# Supplementary material for: Dopamine signaling regulates predator-driven changes in Caenorhabditis elegans’ egg laying behavior
Source: eLife. 2023 Jul 11;12:e83957. doi: 10.7554/eLife.83957 (PMC10335835; doi:10.7554/eLife.83957)
Supplement: Figure 1—figure supplement 2—source data 1. — For each test arena, data tabulate the arena, strain, condition, <x,y> coordinates in pixels, lawn radius in pixels, the egg distance from arena center in pixels, the egg distance from lawn edge in pixels, position as 1 (off) or 0 (on) lawn, the conversion factor for pixel data in mm-per-pixel, the calculated distance from center in mm, the calculated distance from the lawn edge in mm, time in hr. [file elife-83957-fig1-figsupp2-data1.xlsx]

## Sheet: Figure1-S1B
Arena	Strain	Predator	X	Y	LawnRadius	DistCenterPx	DistEdgePx	off	PxScale	DistCenterMm	DistEdgeMm	t
00000002_1.tif	CX7389	Control	14.681	7.526	4.53139	3.71181	-0.819585	0	0.295	1.09498	-0.241778	1
00000002_1.tif	CX7389	Control	15.832	8.031	4.53139	3.67084	-0.86055	0	0.295	1.0829	-0.253862	1
00000002_1.tif	CX7389	Control	14.56	8.162	4.53139	3.0646	-1.4668	0	0.295	0.904056	-0.432705	1
00000002_1.tif	CX7389	Control	16.984	8.525	4.53139	4.04923	-0.482167	0	0.295	1.19452	-0.142239	1
00000002_1.tif	CX7389	Control	16.833	8.559	4.53139	3.91302	-0.618373	0	0.295	1.15434	-0.18242	1
00000002_1.tif	CX7389	Control	16.726	9.209	4.53139	3.42684	-1.10456	0	0.295	1.01092	-0.325845	1
00000002_1.tif	CX7389	Control	11.303	9.912	4.53139	2.88499	-1.64641	0	0.295	0.851071	-0.48569	1
00000002_1.tif	CX7389	Control	15.654	9.942	4.53139	2.12822	-2.40318	0	0.295	0.627823	-0.708938	1
00000002_1.tif	CX7389	Control	11.459	9.934	4.53139	2.73516	-1.79624	0	0.295	0.806872	-0.52989	1
00000002_1.tif	CX7389	Control	11.12	10.414	4.53139	2.88312	-1.64828	0	0.295	0.850519	-0.486242	1
00000002_1.tif	CX7389	Control	13.159	12.642	4.53139	1.66319	-2.8682	0	0.295	0.490641	-0.84612	1
00000002_1.tif	CX7389	Control	12.544	13.969	4.53139	3.12538	-1.40601	0	0.295	0.921988	-0.414774	1
00000002_1.tif	CX7389	Control	13.102	14.024	4.53139	2.97856	-1.55283	0	0.295	0.878676	-0.458085	1
00000002_1.tif	CX7389	Control	13.243	14.221	4.53139	3.13589	-1.39551	0	0.295	0.925087	-0.411674	1
00000034_1.tif	CX7389	Control	9.671	9.285	4.49479	4.52606	0.0312694	1	0.295	1.33519	0.00922447	1
00000034_1.tif	CX7389	Control	16.535	10.987	4.49479	2.97344	-1.52135	0	0.295	0.877163	-0.448799	1
00000034_1.tif	CX7389	Control	15.608	15.181	4.49479	4.17471	-0.320076	0	0.295	1.23154	-0.0944225	1
00000001_1.tif	CX7389	Control	14.231	10.073	4.73449	2.36411	-2.37038	0	0.295	0.697413	-0.699261	1
00000001_1.tif	CX7389	Control	16.863	10.351	4.73449	3.85769	-0.876798	0	0.295	1.13802	-0.258655	1
00000001_1.tif	CX7389	Control	11.728	14.374	4.73449	2.73614	-1.99835	0	0.295	0.807162	-0.589513	1
00000001_1.tif	CX7389	Control	10.174	14.409	4.73449	3.96605	-0.768434	0	0.295	1.16999	-0.226688	1
00000001_1.tif	CX7389	Control	10.812	14.604	4.73449	3.55883	-1.17566	0	0.295	1.04985	-0.34682	1
00000001_1.tif	CX7389	Control	10.318	14.669	4.73449	3.98999	-0.744498	0	0.295	1.17705	-0.219627	1
00000001_1.tif	CX7389	Control	11.663	15.026	4.73449	3.28743	-1.44706	0	0.295	0.969792	-0.426882	1
00000001_1.tif	CX7389	Control	19.119	15.122	4.73449	6.2194	1.48491	1	0.295	1.83472	0.438049	1
00000001_1.tif	CX7389	Control	18.944	15.3	4.73449	6.14714	1.41265	1	0.295	1.81341	0.416731	1
00000001_1.tif	CX7389	Control	11.693	15.936	4.73449	4.05128	-0.683204	0	0.295	1.19513	-0.201545	1
00000013_1.tif	CX7389	Control	15.349	7.459	5.40722	4.56103	-0.846188	0	0.295	1.3455	-0.249626	1
00000013_1.tif	CX7389	Control	14.333	7.553	5.40722	4.49862	-0.908597	0	0.295	1.32709	-0.268036	1
00000013_1.tif	CX7389	Control	15.35	9.221	5.40722	2.80861	-2.59861	0	0.295	0.82854	-0.76659	1
00000013_1.tif	CX7389	Control	15.357	9.756	5.40722	2.28054	-3.12668	0	0.295	0.672761	-0.922369	1
00000013_1.tif	CX7389	Control	15.495	11.042	5.40722	1.09253	-4.31469	0	0.295	0.322297	-1.27283	1
00000013_1.tif	CX7389	Control	15.293	11.278	5.40722	0.791912	-4.61531	0	0.295	0.233614	-1.36152	1
00000013_1.tif	CX7389	Control	12.369	11.721	5.40722	2.62541	-2.78181	0	0.295	0.774495	-0.820635	1
00000013_1.tif	CX7389	Control	14.056	11.741	5.40722	0.960013	-4.44721	0	0.295	0.283204	-1.31193	1
00000013_1.tif	CX7389	Control	16.462	12.193	5.40722	1.49487	-3.91235	0	0.295	0.440986	-1.15414	1
00000013_1.tif	CX7389	Control	15.82	12.219	5.40722	0.8678	-4.53942	0	0.295	0.256001	-1.33913	1
00000013_1.tif	CX7389	Control	15.474	12.314	5.40722	0.583529	-4.82369	0	0.295	0.172141	-1.42299	1
00000013_1.tif	CX7389	Control	16.498	12.429	5.40722	1.57707	-3.83015	0	0.295	0.465234	-1.1299	1
00000013_1.tif	CX7389	Control	19.567	12.573	5.40722	4.62303	-0.784195	0	0.295	1.36379	-0.231337	1
00000013_1.tif	CX7389	Control	13.632	13.818	5.40722	2.25862	-3.1486	0	0.295	0.666294	-0.928836	1
00000013_1.tif	CX7389	Control	14.064	14.125	5.40722	2.30903	-3.09819	0	0.295	0.681164	-0.913966	1
00000031_1.tif	CX7389	Control	15.432	9.372	4.89601	3.43443	-1.46159	0	0.295	1.01316	-0.431169	1
00000031_1.tif	CX7389	Control	15.377	9.436	4.89601	3.36182	-1.5342	0	0.295	0.991736	-0.452588	1
00000031_1.tif	CX7389	Control	15.77	9.846	4.89601	3.05794	-1.83808	0	0.295	0.902091	-0.542233	1
00000031_1.tif	CX7389	Control	11.395	12.789	4.89601	3.41722	-1.47879	0	0.295	1.00808	-0.436244	1
00000031_1.tif	CX7389	Control	12.936	14.116	4.89601	2.32063	-2.57538	0	0.295	0.684586	-0.759738	1
00000028_1.tif	CX7389	Control	13.214	9.05	4.89045	2.63722	-2.25323	0	0.295	0.77798	-0.664704	1
00000028_1.tif	CX7389	Control	13.449	9.972	4.89045	1.85022	-3.04023	0	0.295	0.545815	-0.896869	1
00000028_1.tif	CX7389	Control	15.865	10.055	4.89045	1.29563	-3.59482	0	0.295	0.382211	-1.06047	1
00000028_1.tif	CX7389	Control	14.817	10.985	4.89045	0.168193	-4.72226	0	0.295	0.049617	-1.39307	1
00000028_1.tif	CX7389	Control	12.754	11.205	4.89045	2.23895	-2.6515	0	0.295	0.66049	-0.782193	1
00000028_1.tif	CX7389	Control	12.837	11.334	4.89045	2.17206	-2.71839	0	0.295	0.640758	-0.801926	1
00000028_1.tif	CX7389	Control	12.531	11.423	4.89045	2.48836	-2.40209	0	0.295	0.734066	-0.708618	1
00000028_1.tif	CX7389	Control	17.744	11.507	4.89045	2.80528	-2.08517	0	0.295	0.827558	-0.615126	1
00000028_1.tif	CX7389	Control	12.21	11.558	4.89045	2.82858	-2.06187	0	0.295	0.834432	-0.608252	1
00000028_1.tif	CX7389	Control	11.689	11.592	4.89045	3.34688	-1.54357	0	0.295	0.987329	-0.455355	1
00000028_1.tif	CX7389	Control	14.134	11.588	4.89045	1.03072	-3.85973	0	0.295	0.304063	-1.13862	1
00000028_1.tif	CX7389	Control	13.861	11.717	4.89045	1.32969	-3.56076	0	0.295	0.392258	-1.05043	1
00000028_1.tif	CX7389	Control	14.428	11.709	4.89045	0.89708	-3.99337	0	0.295	0.264639	-1.17805	1
00000028_1.tif	CX7389	Control	16.943	11.811	4.89045	2.11833	-2.77212	0	0.295	0.624907	-0.817777	1
00000028_1.tif	CX7389	Control	12.281	12.568	4.89045	3.12237	-1.76809	0	0.295	0.921098	-0.521585	1
00000028_1.tif	CX7389	Control	17.984	12.586	4.89045	3.3911	-1.49935	0	0.295	1.00037	-0.442309	1
00000028_1.tif	CX7389	Control	18.441	13.089	4.89045	4.03657	-0.853882	0	0.295	1.19079	-0.251895	1
00000028_1.tif	CX7389	Control	12.266	13.125	4.89045	3.44702	-1.44344	0	0.295	1.01687	-0.425814	1
00000028_1.tif	CX7389	Control	14.04	21.769	4.89045	10.8053	5.91486	1	0.295	3.18757	1.74488	1
00000021_1.tif	CX7389	Control	12.395	7.893	4.24509	3.59759	-0.647504	0	0.295	1.06129	-0.191014	1
00000021_1.tif	CX7389	Control	12.51	7.9	4.24509	3.51975	-0.725345	0	0.295	1.03832	-0.213977	1
00000021_1.tif	CX7389	Control	16.701	9.046	4.24509	2.57688	-1.66821	0	0.295	0.760178	-0.492123	1
00000021_1.tif	CX7389	Control	12.854	9.762	4.24509	2.04698	-2.19811	0	0.295	0.603859	-0.648443	1
00000021_1.tif	CX7389	Control	11.666	10.103	4.24509	3.078	-1.16709	0	0.295	0.90801	-0.344291	1
00000021_1.tif	CX7389	Control	18.247	10.526	4.24509	3.55656	-0.688528	0	0.295	1.04919	-0.203116	1
00000021_1.tif	CX7389	Control	14.181	10.783	4.24509	0.526334	-3.71876	0	0.295	0.155269	-1.09703	1
00000021_1.tif	CX7389	Control	18.605	10.823	4.24509	3.91535	-0.329738	0	0.295	1.15503	-0.0972727	1
00000021_1.tif	CX7389	Control	17.37	11.711	4.24509	2.87556	-1.36953	0	0.295	0.848289	-0.404012	1
00000021_1.tif	CX7389	Control	16.509	11.91	4.24509	2.20405	-2.04104	0	0.295	0.650196	-0.602106	1
00000021_1.tif	CX7389	Control	13.167	11.991	4.24509	2.02425	-2.22084	0	0.295	0.597153	-0.655149	1
00000021_1.tif	CX7389	Control	13.568	11.987	4.24509	1.73894	-2.50615	0	0.295	0.512986	-0.739315	1
00000021_1.tif	CX7389	Control	12.297	12.25	4.24509	2.87502	-1.37007	0	0.295	0.848131	-0.404171	1
00000021_1.tif	CX7389	Control	12.593	12.514	4.24509	2.80064	-1.44445	0	0.295	0.82619	-0.426112	1
00000021_1.tif	CX7389	Control	12.509	12.922	4.24509	3.14356	-1.10153	0	0.295	0.927351	-0.324951	1
00000021_1.tif	CX7389	Control	13.813	13.436	4.24509	2.91119	-1.3339	0	0.295	0.858801	-0.393501	1
00000021_1.tif	CX7389	Control	14.668	13.672	4.24509	3.0111	-1.23399	0	0.295	0.888276	-0.364026	1
00000017_1.tif	CX7389	Control	13.127	9.016	4.91678	2.54835	-2.36843	0	0.295	0.751763	-0.698686	1
00000017_1.tif	CX7389	Control	17.09	13.982	4.91678	4.14903	-0.767741	0	0.295	1.22397	-0.226483	1
00000017_1.tif	CX7389	Control	16.425	14.573	4.91678	4.06984	-0.846939	0	0.295	1.2006	-0.249847	1
00000017_1.tif	CX7389	Control	16.267	14.693	4.91678	4.06325	-0.853527	0	0.295	1.19866	-0.25179	1
00000007_1.tif	CX7389	Control	10.547	4.706	4.15732	6.60266	2.44535	1	0.295	1.94779	0.721378	1
00000007_1.tif	CX7389	Control	8.63	11.365	4.15732	3.23447	-0.922847	0	0.295	0.954168	-0.27224	1
00000010_1.tif	CX7389	Control	17.221	8.875	5.33844	2.76919	-2.56925	0	0.295	0.816912	-0.757928	1
00000010_1.tif	CX7389	Control	17.765	8.995	5.33844	3.08744	-2.251	0	0.295	0.910795	-0.664044	1
00000010_1.tif	CX7389	Control	11.699	9.449	5.33844	3.92727	-1.41117	0	0.295	1.15855	-0.416294	1
00000010_1.tif	CX7389	Control	14.254	10.213	5.33844	1.29434	-4.0441	0	0.295	0.381829	-1.19301	1
00000010_1.tif	CX7389	Control	16.111	10.516	5.33844	0.862736	-4.4757	0	0.295	0.254507	-1.32033	1
00000010_1.tif	CX7389	Control	12.746	11.906	5.33844	2.78202	-2.55642	0	0.295	0.820696	-0.754144	1
00000010_1.tif	CX7389	Control	12.018	12.697	5.33844	3.77519	-1.56325	0	0.295	1.11368	-0.461158	1
00000010_1.tif	CX7389	Control	11.224	12.933	5.33844	4.58943	-0.749006	0	0.295	1.35388	-0.220957	1
00000010_1.tif	CX7389	Control	12.823	13.64	5.33844	3.71522	-1.62322	0	0.295	1.09599	-0.478848	1
00000011_1.tif	CX7389	Control	15.931	7.742	4.6825	3.43251	-1.24999	0	0.295	1.01259	-0.368747	1
00000011_1.tif	CX7389	Control	17.527	7.785	4.6825	3.97475	-0.707752	0	0.295	1.17255	-0.208787	1
00000011_1.tif	CX7389	Control	15.946	7.837	4.6825	3.34129	-1.34121	0	0.295	0.98568	-0.395658	1
00000011_1.tif	CX7389	Control	17.304	8.346	4.6825	3.38414	-1.29836	0	0.295	0.998323	-0.383015	1
00000011_1.tif	CX7389	Control	14.789	9.559	4.6825	1.67849	-3.00401	0	0.295	0.495154	-0.886184	1
00000011_1.tif	CX7389	Control	14.824	10.037	4.6825	1.22629	-3.45621	0	0.295	0.361755	-1.01958	1
00000011_1.tif	CX7389	Control	15.46	11.561	4.6825	0.438362	-4.24414	0	0.295	0.129317	-1.25202	1
00000018_1.tif	CX7389	Control	12.133	7.903	4.83787	4.04593	-0.791945	0	0.295	1.19355	-0.233624	1
00000018_1.tif	CX7389	Control	15.876	8.113	4.83787	3.78643	-1.05144	0	0.295	1.117	-0.310175	1
00000018_1.tif	CX7389	Control	13.665	8.515	4.83787	2.96264	-1.87524	0	0.295	0.873978	-0.553195	1
00000018_1.tif	CX7389	Control	6.747	9.184	4.83787	7.67741	2.83954	1	0.295	2.26484	0.837663	1
00000018_1.tif	CX7389	Control	16.824	10.554	4.83787	2.88311	-1.95476	0	0.295	0.850517	-0.576655	1
00000018_1.tif	CX7389	Control	14.076	11.607	4.83787	0.159154	-4.67872	0	0.295	0.0469504	-1.38022	1
00000018_1.tif	CX7389	Control	17.49	11.643	4.83787	3.41258	-1.4253	0	0.295	1.00671	-0.420462	1
00000018_1.tif	CX7389	Control	17.817	12.02	4.83787	3.77756	-1.06031	0	0.295	1.11438	-0.312793	1
00000018_1.tif	CX7389	Control	10.441	13.145	4.83787	4.01796	-0.819916	0	0.295	1.1853	-0.241875	1
00000018_1.tif	CX7389	Control	11.936	13.986	4.83787	3.32431	-1.51356	0	0.295	0.980672	-0.4465	1
00000018_1.tif	CX7389	Control	11.167	14.034	4.83787	3.89749	-0.940379	0	0.295	1.14976	-0.277412	1
00000018_1.tif	CX7389	Control	12.905	14.791	4.83787	3.54448	-1.29339	0	0.295	1.04562	-0.381551	1
00000018_1.tif	CX7389	Control	12.422	15.091	4.83787	4.00379	-0.834078	0	0.295	1.18112	-0.246053	1
00000004_1.tif	CX7389	Control	16.223	7.98	5.052	3.6053	-1.44671	0	0.295	1.06356	-0.426778	2
00000004_1.tif	CX7389	Control	16.3	8.08	5.052	3.52819	-1.52381	0	0.295	1.04082	-0.449525	2
00000004_1.tif	CX7389	Control	16.696	8.284	5.052	3.4654	-1.5866	0	0.295	1.02229	-0.468048	2
00000004_1.tif	CX7389	Control	12.794	8.405	5.052	4.00038	-1.05162	0	0.295	1.18011	-0.310227	2
00000004_1.tif	CX7389	Control	14.258	8.581	5.052	3.09833	-1.95368	0	0.295	0.914006	-0.576335	2
00000004_1.tif	CX7389	Control	14.621	8.781	5.052	2.7958	-2.2562	0	0.295	0.824761	-0.66558	2
00000004_1.tif	CX7389	Control	16.225	8.786	5.052	2.83035	-2.22165	0	0.295	0.834954	-0.655387	2
00000004_1.tif	CX7389	Control	15.805	8.864	5.052	2.65361	-2.3984	0	0.295	0.782814	-0.707527	2
00000004_1.tif	CX7389	Control	14.188	8.948	5.052	2.78667	-2.26533	0	0.295	0.822067	-0.668274	2
00000004_1.tif	CX7389	Control	15.651	8.943	5.052	2.55333	-2.49867	0	0.295	0.753233	-0.737108	2
00000004_1.tif	CX7389	Control	14.166	9.095	5.052	2.66361	-2.3884	0	0.295	0.785764	-0.704577	2
00000004_1.tif	CX7389	Control	16.063	9.106	5.052	2.47665	-2.57535	0	0.295	0.730613	-0.759728	2
00000004_1.tif	CX7389	Control	18.205	9.131	5.052	3.69341	-1.35859	0	0.295	1.08956	-0.400784	2
00000004_1.tif	CX7389	Control	12.852	9.307	5.052	3.31324	-1.73876	0	0.295	0.977407	-0.512933	2
00000004_1.tif	CX7389	Control	12.773	9.337	5.052	3.35406	-1.69794	0	0.295	0.989448	-0.500893	2
00000004_1.tif	CX7389	Control	16.166	9.403	5.052	2.22915	-2.82285	0	0.295	0.6576	-0.832741	2
00000004_1.tif	CX7389	Control	12.691	9.437	5.052	3.35579	-1.69621	0	0.295	0.989958	-0.500382	2
00000004_1.tif	CX7389	Control	16.076	9.692	5.052	1.92734	-3.12466	0	0.295	0.568566	-0.921774	2
00000004_1.tif	CX7389	Control	16.412	9.757	5.052	2.02105	-3.03095	0	0.295	0.59621	-0.89413	2
00000004_1.tif	CX7389	Control	11.705	9.815	5.052	4.0105	-1.0415	0	0.295	1.1831	-0.307244	2
00000004_1.tif	CX7389	Control	12.207	9.985	5.052	3.48363	-1.56838	0	0.295	1.02767	-0.462671	2
00000004_1.tif	CX7389	Control	16.175	10.011	5.052	1.68198	-3.37002	0	0.295	0.496185	-0.994156	2
00000004_1.tif	CX7389	Control	17.444	10.018	5.052	2.55002	-2.50198	0	0.295	0.752257	-0.738084	2
00000004_1.tif	CX7389	Control	13.259	10.132	5.052	2.49067	-2.56133	0	0.295	0.734747	-0.755593	2
00000004_1.tif	CX7389	Control	19.066	10.142	5.052	3.94544	-1.10656	0	0.295	1.16391	-0.326435	2
00000004_1.tif	CX7389	Control	15.197	10.322	5.052	1.1676	-3.8844	0	0.295	0.344443	-1.1459	2
00000004_1.tif	CX7389	Control	15.84	10.329	5.052	1.24848	-3.80352	0	0.295	0.368301	-1.12204	2
00000004_1.tif	CX7389	Control	17.041	10.667	5.052	1.87225	-3.17975	0	0.295	0.552313	-0.938027	2
00000004_1.tif	CX7389	Control	15.138	10.797	5.052	0.715388	-4.33661	0	0.295	0.211039	-1.2793	2
00000004_1.tif	CX7389	Control	16.038	10.791	5.052	0.970155	-4.08185	0	0.295	0.286196	-1.20414	2
00000004_1.tif	CX7389	Control	15.318	10.827	5.052	0.652993	-4.39901	0	0.295	0.192633	-1.29771	2
00000004_1.tif	CX7389	Control	16.658	11.125	5.052	1.3512	-3.70081	0	0.295	0.398603	-1.09174	2
00000004_1.tif	CX7389	Control	16.47	11.292	5.052	1.13156	-3.92044	0	0.295	0.33381	-1.15653	2
00000004_1.tif	CX7389	Control	16.367	11.438	5.052	1.01383	-4.03817	0	0.295	0.29908	-1.19126	2
00000004_1.tif	CX7389	Control	19.2	11.667	5.052	3.85059	-1.20141	0	0.295	1.13592	-0.354416	2
00000004_1.tif	CX7389	Control	17.854	11.806	5.052	2.5213	-2.53071	0	0.295	0.743782	-0.746559	2
00000004_1.tif	CX7389	Control	14.312	11.846	5.052	1.10474	-3.94726	0	0.295	0.325899	-1.16444	2
00000004_1.tif	CX7389	Control	17.693	11.87	5.052	2.37146	-2.68055	0	0.295	0.699579	-0.790761	2
00000004_1.tif	CX7389	Control	19.183	12.168	5.052	3.8905	-1.16151	0	0.295	1.1477	-0.342644	2
00000004_1.tif	CX7389	Control	11.904	12.286	5.052	3.54313	-1.50887	0	0.295	1.04522	-0.445118	2
00000004_1.tif	CX7389	Control	17.989	12.286	5.052	2.75581	-2.29619	0	0.295	0.812963	-0.677377	2
00000004_1.tif	CX7389	Control	11.747	12.524	5.052	3.75533	-1.29668	0	0.295	1.10782	-0.382519	2
00000004_1.tif	CX7389	Control	15.142	12.615	5.052	1.15561	-3.89639	0	0.295	0.340906	-1.14943	2
00000004_1.tif	CX7389	Control	16.446	12.753	5.052	1.67796	-3.37404	0	0.295	0.494997	-0.995343	2
00000004_1.tif	CX7389	Control	11.026	12.852	5.052	4.54056	-0.511439	0	0.295	1.33947	-0.150874	2
00000004_1.tif	CX7389	Control	18.075	13.138	5.052	3.18687	-1.86513	0	0.295	0.940126	-0.550215	2
00000004_1.tif	CX7389	Control	12.564	13.695	5.052	3.56297	-1.48903	0	0.295	1.05108	-0.439264	2
00000004_1.tif	CX7389	Control	17.743	13.794	5.052	3.32664	-1.72536	0	0.295	0.981359	-0.508981	2
00000004_1.tif	CX7389	Control	16.877	14.161	5.052	3.08426	-1.96774	0	0.295	0.909856	-0.580484	2
00000004_1.tif	CX7389	Control	17.352	14.184	5.052	3.36289	-1.68911	0	0.295	0.992053	-0.498288	2
00000004_1.tif	CX7389	Control	12.496	14.232	5.052	3.96827	-1.08373	0	0.295	1.17064	-0.319701	2
00000004_1.tif	CX7389	Control	16.658	14.393	5.052	3.19246	-1.85954	0	0.295	0.941776	-0.548564	2
00000004_1.tif	CX7389	Control	17.362	14.509	5.052	3.63496	-1.41704	0	0.295	1.07231	-0.418026	2
00000004_1.tif	CX7389	Control	17.512	14.558	5.052	3.75995	-1.29205	0	0.295	1.10918	-0.381156	2
00000004_1.tif	CX7389	Control	12.616	14.578	5.052	4.13527	-0.916733	0	0.295	1.2199	-0.270436	2
00000004_1.tif	CX7389	Control	17.258	14.896	5.052	3.91166	-1.14034	0	0.295	1.15394	-0.3364	2
00000004_1.tif	CX7389	Control	15.776	14.925	5.052	3.47174	-1.58026	0	0.295	1.02416	-0.466176	2
00000004_1.tif	CX7389	Control	15.995	15.158	5.052	3.73442	-1.31758	0	0.295	1.10166	-0.388686	2
00000015_7.tif	CX7389	Control	14.487	8.056	4.30207	3.73739	-0.564678	0	0.295	1.10253	-0.16658	2
00000015_7.tif	CX7389	Control	13.522	8.482	4.30207	3.42065	-0.881417	0	0.295	1.00909	-0.260018	2
00000015_7.tif	CX7389	Control	13.278	8.768	4.30207	3.22025	-1.08182	0	0.295	0.949974	-0.319136	2
00000015_7.tif	CX7389	Control	15.698	8.783	4.30207	3.28299	-1.01908	0	0.295	0.968483	-0.300628	2
00000015_7.tif	CX7389	Control	15.78	8.788	4.30207	3.31211	-0.989965	0	0.295	0.977071	-0.29204	2
00000015_7.tif	CX7389	Control	16.847	10.021	4.30207	3.0328	-1.26927	0	0.295	0.894676	-0.374434	2
00000015_7.tif	CX7389	Control	16.365	10.053	4.30207	2.63525	-1.66682	0	0.295	0.777398	-0.491713	2
00000015_7.tif	CX7389	Control	12.401	10.851	4.30207	2.19585	-2.10623	0	0.295	0.647774	-0.621336	2
00000015_7.tif	CX7389	Control	17.642	11.104	4.30207	3.32887	-0.973198	0	0.295	0.982017	-0.287093	2
00000015_7.tif	CX7389	Control	17.512	11.334	4.30207	3.16036	-1.14171	0	0.295	0.932307	-0.336804	2
00000015_7.tif	CX7389	Control	11.961	11.412	4.30207	2.4536	-1.84847	0	0.295	0.723813	-0.545297	2
00000015_7.tif	CX7389	Control	13.925	11.887	4.30207	0.469707	-3.83236	0	0.295	0.138564	-1.13055	2
00000015_7.tif	CX7389	Control	16.631	12.103	4.30207	2.26743	-2.03464	0	0.295	0.668892	-0.600219	2
00000015_7.tif	CX7389	Control	13.842	12.243	4.30207	0.705868	-3.5962	0	0.295	0.208231	-1.06088	2
00000015_7.tif	CX7389	Control	12.333	12.523	4.30207	2.17832	-2.12375	0	0.295	0.642604	-0.626507	2
00000015_7.tif	CX7389	Control	13.334	12.588	4.30207	1.31841	-2.98366	0	0.295	0.388932	-0.880178	2
00000015_7.tif	CX7389	Control	17.173	12.819	4.30207	2.97114	-1.33093	0	0.295	0.876486	-0.392624	2
00000015_7.tif	CX7389	Control	16.766	13.02	4.30207	2.67902	-1.62305	0	0.295	0.790311	-0.4788	2
00000015_7.tif	CX7389	Control	14.214	13.036	4.30207	1.2557	-3.04637	0	0.295	0.370431	-0.89868	2
00000015_7.tif	CX7389	Control	12.267	13.531	4.30207	2.74045	-1.56162	0	0.295	0.808432	-0.460679	2
00000015_7.tif	CX7389	Control	12.138	13.526	4.30207	2.83827	-1.4638	0	0.295	0.837289	-0.431822	2
00000015_7.tif	CX7389	Control	12.008	13.573	4.30207	2.9702	-1.33187	0	0.295	0.876209	-0.392902	2
00000015_7.tif	CX7389	Control	15.943	13.625	4.30207	2.40567	-1.8964	0	0.295	0.709673	-0.559438	2
00000015_7.tif	CX7389	Control	13.987	13.729	4.30207	1.97747	-2.3246	0	0.295	0.583353	-0.685758	2
00000015_7.tif	CX7389	Control	15.927	13.741	4.30207	2.48523	-1.81684	0	0.295	0.733143	-0.535968	2
00000015_7.tif	CX7389	Control	12.014	13.856	4.30207	3.14352	-1.15855	0	0.295	0.927339	-0.341771	2
00000015_7.tif	CX7389	Control	17	14.401	4.30207	3.69393	-0.608142	0	0.295	1.08971	-0.179402	2
00000015_7.tif	CX7389	Control	13.155	14.417	4.30207	2.89888	-1.40319	0	0.295	0.855171	-0.41394	2
00000015_7.tif	CX7389	Control	16.708	14.411	4.30207	3.50078	-0.801286	0	0.295	1.03273	-0.236379	2
00000015_7.tif	CX7389	Control	13.117	14.518	4.30207	3.00648	-1.29559	0	0.295	0.886911	-0.3822	2
00000015_7.tif	CX7389	Control	12.782	15.092	4.30207	3.66873	-0.633336	0	0.295	1.08228	-0.186834	2
00000015_7.tif	CX7389	Control	13.356	15.189	4.30207	3.54943	-0.752641	0	0.295	1.04708	-0.222029	2
00000007_7.tif	CX7389	Control	15.997	6.964	4.88567	3.36033	-1.52534	0	0.295	0.991296	-0.449976	2
00000007_7.tif	CX7389	Control	15.782	7.079	4.88567	3.18492	-1.70074	0	0.295	0.939553	-0.501719	2
00000007_7.tif	CX7389	Control	16.954	7.517	4.88567	3.33687	-1.5488	0	0.295	0.984376	-0.456896	2
00000007_7.tif	CX7389	Control	16.862	7.766	4.88567	3.08556	-1.80011	0	0.295	0.910241	-0.531031	2
00000007_7.tif	CX7389	Control	10.413	8.401	4.88567	4.79641	-0.0892577	0	0.295	1.41494	-0.026331	2
00000007_7.tif	CX7389	Control	12.182	8.489	4.88567	3.16473	-1.72094	0	0.295	0.933596	-0.507676	2
00000007_7.tif	CX7389	Control	16.902	8.965	4.88567	2.33178	-2.55389	0	0.295	0.687875	-0.753397	2
00000007_7.tif	CX7389	Control	16.644	9.461	4.88567	1.88371	-3.00196	0	0.295	0.555694	-0.885578	2
00000007_7.tif	CX7389	Control	16.227	9.492	4.88567	1.48809	-3.39758	0	0.295	0.438987	-1.00229	2
00000007_7.tif	CX7389	Control	11.369	9.601	4.88567	3.55632	-1.32935	0	0.295	1.04911	-0.392157	2
00000007_7.tif	CX7389	Control	14.481	9.756	4.88567	0.553947	-4.33172	0	0.295	0.163414	-1.27786	2
00000007_7.tif	CX7389	Control	10.989	10.063	4.88567	3.89667	-0.989002	0	0.295	1.14952	-0.291755	2
00000007_7.tif	CX7389	Control	17.228	10.532	4.88567	2.3764	-2.50927	0	0.295	0.701037	-0.740235	2
00000007_7.tif	CX7389	Control	17.17	10.766	4.88567	2.37052	-2.51514	0	0.295	0.699305	-0.741967	2
00000007_7.tif	CX7389	Control	13.003	11.267	4.88567	2.19621	-2.68945	0	0.295	0.647883	-0.793389	2
00000007_7.tif	CX7389	Control	12.515	11.353	4.88567	2.66466	-2.221	0	0.295	0.786075	-0.655196	2
00000007_7.tif	CX7389	Control	18.631	11.378	4.88567	3.94684	-0.938824	0	0.295	1.16432	-0.276953	2
00000007_7.tif	CX7389	Control	18.508	11.645	4.88567	3.92508	-0.96059	0	0.295	1.1579	-0.283374	2
00000007_7.tif	CX7389	Control	11.409	11.712	4.88567	3.817	-1.06866	0	0.295	1.12602	-0.315256	2
00000007_7.tif	CX7389	Control	10.933	11.97	4.88567	4.35724	-0.528428	0	0.295	1.28539	-0.155886	2
00000007_7.tif	CX7389	Control	11.653	12.002	4.88567	3.73249	-1.15317	0	0.295	1.10109	-0.340186	2
00000007_7.tif	CX7389	Control	17.704	12.273	4.88567	3.53805	-1.34762	0	0.295	1.04373	-0.397547	2
00000007_7.tif	CX7389	Control	16.967	12.705	4.88567	3.30751	-1.57816	0	0.295	0.975716	-0.465556	2
00000007_7.tif	CX7389	Control	13.424	13.298	4.88567	3.48412	-1.40155	0	0.295	1.02782	-0.413456	2
00000007_7.tif	CX7389	Control	14.444	13.528	4.88567	3.42154	-1.46413	0	0.295	1.00935	-0.431918	2
00000007_7.tif	CX7389	Control	14.666	13.637	4.88567	3.50884	-1.37683	0	0.295	1.03511	-0.406164	2
00000007_7.tif	CX7389	Control	14.905	13.762	4.88567	3.62706	-1.25861	0	0.295	1.06998	-0.37129	2
00000007_7.tif	CX7389	Control	13.362	13.802	4.88567	3.97069	-0.914972	0	0.295	1.17135	-0.269917	2
00000007_7.tif	CX7389	Control	14.203	13.82	4.88567	3.74758	-1.13809	0	0.295	1.10554	-0.335736	2
00000007_7.tif	CX7389	Control	14.034	14.351	4.88567	4.30103	-0.584637	0	0.295	1.2688	-0.172468	2
00000007_7.tif	CX7389	Control	13.629	14.515	4.88567	4.55653	-0.32914	0	0.295	1.34418	-0.0970963	2
00000011_7.tif	CX7389	Control	14.172	6.342	5.33334	4.31182	-1.02151	0	0.295	1.27199	-0.301347	2
00000011_7.tif	CX7389	Control	14.308	6.326	5.33334	4.32505	-1.00829	0	0.295	1.27589	-0.297446	2
00000011_7.tif	CX7389	Control	13.529	6.753	5.33334	3.97905	-1.35429	0	0.295	1.17382	-0.399516	2
00000011_7.tif	CX7389	Control	11.934	6.847	5.33334	4.49462	-0.838713	0	0.295	1.32591	-0.24742	2
00000011_7.tif	CX7389	Control	14.501	6.872	5.33334	3.78296	-1.55038	0	0.295	1.11597	-0.457362	2
00000011_7.tif	CX7389	Control	11.669	6.947	5.33334	4.55959	-0.773744	0	0.295	1.34508	-0.228254	2
00000011_7.tif	CX7389	Control	12.763	7.33	5.33334	3.67128	-1.66206	0	0.295	1.08303	-0.490308	2
00000011_7.tif	CX7389	Control	15.606	7.726	5.33334	3.19201	-2.14133	0	0.295	0.941642	-0.631693	2
00000011_7.tif	CX7389	Control	15.581	7.907	5.33334	3.01655	-2.31679	0	0.295	0.889881	-0.683454	2
00000011_7.tif	CX7389	Control	15.386	7.982	5.33334	2.87105	-2.46229	0	0.295	0.84696	-0.726375	2
00000011_7.tif	CX7389	Control	13.51	8.116	5.33334	2.66371	-2.66963	0	0.295	0.785794	-0.78754	2
00000011_7.tif	CX7389	Control	14.435	8.87	5.33334	1.78421	-3.54913	0	0.295	0.526342	-1.04699	2
00000011_7.tif	CX7389	Control	14.353	8.986	5.33334	1.66519	-3.66815	0	0.295	0.49123	-1.0821	2
00000011_7.tif	CX7389	Control	13.939	9.532	5.33334	1.18469	-4.14865	0	0.295	0.349483	-1.22385	2
00000011_7.tif	CX7389	Control	16.838	9.655	5.33334	2.70039	-2.63295	0	0.295	0.796616	-0.776719	2
00000011_7.tif	CX7389	Control	17.067	9.662	5.33334	2.91209	-2.42125	0	0.295	0.859065	-0.714269	2
00000011_7.tif	CX7389	Control	13.939	9.774	5.33334	0.959401	-4.37394	0	0.295	0.283023	-1.29031	2
00000011_7.tif	CX7389	Control	17.027	10.016	5.33334	2.77269	-2.56064	0	0.295	0.817944	-0.75539	2
00000011_7.tif	CX7389	Control	14.82	10.039	5.33334	0.785244	-4.54809	0	0.295	0.231647	-1.34169	2
00000011_7.tif	CX7389	Control	10.55	10.174	5.33334	3.80799	-1.52534	0	0.295	1.12336	-0.449977	2
00000011_7.tif	CX7389	Control	14.849	10.282	5.33334	0.638437	-4.6949	0	0.295	0.188339	-1.385	2
00000011_7.tif	CX7389	Control	11.789	10.38	5.33334	2.55342	-2.77992	0	0.295	0.753259	-0.820075	2
00000011_7.tif	CX7389	Control	12.733	10.456	5.33334	1.60688	-3.72646	0	0.295	0.474028	-1.09931	2
00000011_7.tif	CX7389	Control	18.372	10.848	5.33334	4.0488	-1.28454	0	0.295	1.19439	-0.37894	2
00000011_7.tif	CX7389	Control	13.558	11.076	5.33334	0.879503	-4.45383	0	0.295	0.259453	-1.31388	2
00000011_7.tif	CX7389	Control	14.883	11.153	5.33334	0.748351	-4.58499	0	0.295	0.220764	-1.35257	2
00000011_7.tif	CX7389	Control	10.272	12.35	5.33334	4.39747	-0.935868	0	0.295	1.29725	-0.276081	2
00000011_7.tif	CX7389	Control	17.117	12.388	5.33334	3.28568	-2.04766	0	0.295	0.969275	-0.604059	2
00000011_7.tif	CX7389	Control	14.715	13.483	5.33334	2.85832	-2.47502	0	0.295	0.843204	-0.73013	2
00000011_7.tif	CX7389	Control	13.171	13.545	5.33334	3.11671	-2.21663	0	0.295	0.91943	-0.653905	2
00000011_7.tif	CX7389	Control	11.73	13.924	5.33334	4.17877	-1.15457	0	0.295	1.23274	-0.340597	2
00000011_7.tif	CX7389	Control	12.256	14.211	5.33334	4.11908	-1.21426	0	0.295	1.21513	-0.358207	2
00000011_7.tif	CX7389	Control	12.67	14.629	5.33334	4.30969	-1.02365	0	0.295	1.27136	-0.301975	2
00000011_7.tif	CX7389	Control	13.497	15.293	5.33334	4.7158	-0.617542	0	0.295	1.39116	-0.182175	2
00000011_7.tif	CX7389	Control	13.064	15.879	5.33334	5.37863	0.0452942	1	0.295	1.5867	0.0133618	2
00000001_7.tif	CX7389	Control	13.746	6.852	5.10948	4.2137	-0.895787	0	0.295	1.24304	-0.264257	2
00000001_7.tif	CX7389	Control	11.693	7.113	5.10948	3.52197	-1.58752	0	0.295	1.03898	-0.468317	2
00000001_7.tif	CX7389	Control	14.105	7.158	5.10948	4.12376	-0.985722	0	0.295	1.21651	-0.290788	2
00000001_7.tif	CX7389	Control	13.175	7.305	5.10948	3.56828	-1.5412	0	0.295	1.05264	-0.454654	2
00000001_7.tif	CX7389	Control	12.787	7.586	5.10948	3.17625	-1.93323	0	0.295	0.936995	-0.570303	2
00000001_7.tif	CX7389	Control	16.135	7.973	5.10948	5.01644	-0.0930432	0	0.295	1.47985	-0.0274477	2
00000001_7.tif	CX7389	Control	12.951	8.175	5.10948	2.67844	-2.43104	0	0.295	0.790141	-0.717156	2
00000001_7.tif	CX7389	Control	11.638	8.974	5.10948	1.67359	-3.43589	0	0.295	0.493709	-1.01359	2
00000001_7.tif	CX7389	Control	14.962	8.961	5.10948	3.50489	-1.60459	0	0.295	1.03394	-0.473354	2
00000001_7.tif	CX7389	Control	12.322	9.134	5.10948	1.55993	-3.54955	0	0.295	0.460179	-1.04712	2
00000001_7.tif	CX7389	Control	12.454	9.218	5.10948	1.52421	-3.58527	0	0.295	0.449642	-1.05766	2
00000001_7.tif	CX7389	Control	10.988	9.52	5.10948	1.424	-3.68549	0	0.295	0.420079	-1.08722	2
00000001_7.tif	CX7389	Control	13.217	9.715	5.10948	1.62012	-3.48936	0	0.295	0.477936	-1.02936	2
00000001_7.tif	CX7389	Control	12.684	10.73	5.10948	0.810195	-4.29929	0	0.295	0.239008	-1.26829	2
00000001_7.tif	CX7389	Control	12.758	10.872	5.10948	0.91074	-4.19874	0	0.295	0.268668	-1.23863	2
00000001_7.tif	CX7389	Control	15.167	10.955	5.10948	3.30303	-1.80646	0	0.295	0.974393	-0.532904	2
00000001_7.tif	CX7389	Control	15.276	11.067	5.10948	3.424	-1.68548	0	0.295	1.01008	-0.497217	2
00000001_7.tif	CX7389	Control	12.687	11.169	5.10948	0.970448	-4.13904	0	0.295	0.286282	-1.22102	2
00000001_7.tif	CX7389	Control	15.276	11.175	5.10948	3.43945	-1.67003	0	0.295	1.01464	-0.492659	2
00000001_7.tif	CX7389	Control	11.392	11.545	5.10948	1.037	-4.07248	0	0.295	0.305915	-1.20138	2
00000001_7.tif	CX7389	Control	16.203	11.774	5.10948	4.47181	-0.637676	0	0.295	1.31918	-0.188114	2
00000001_7.tif	CX7389	Control	11.406	11.785	5.10948	1.24848	-3.861	0	0.295	0.368301	-1.139	2
00000001_7.tif	CX7389	Control	11.337	11.908	5.10948	1.38857	-3.72091	0	0.295	0.409629	-1.09767	2
00000001_7.tif	CX7389	Control	12.886	12.286	5.10948	1.93762	-3.17186	0	0.295	0.571598	-0.9357	2
00000001_7.tif	CX7389	Control	14.51	12.42	5.10948	3.18135	-1.92813	0	0.295	0.938499	-0.568799	2
00000001_7.tif	CX7389	Control	19.353	12.699	5.10948	7.75413	2.64464	1	0.295	2.28747	0.78017	2
00000001_7.tif	CX7389	Control	7.12	13.024	5.10948	5.32812	0.218634	1	0.295	1.57179	0.064497	2
00000001_7.tif	CX7389	Control	13.265	13.233	5.10948	2.94853	-2.16095	0	0.295	0.869817	-0.637481	2
00000001_7.tif	CX7389	Control	10.163	13.484	5.10948	3.33068	-1.77881	0	0.295	0.98255	-0.524748	2
00000001_7.tif	CX7389	Control	10.373	14.406	5.10948	4.06561	-1.04387	0	0.295	1.19936	-0.307941	2
00000001_7.tif	CX7389	Control	11.272	14.947	5.10948	4.3596	-0.749879	0	0.295	1.28608	-0.221214	2
00000001_7.tif	CX7389	Control	11.258	15.073	5.10948	4.48633	-0.623156	0	0.295	1.32347	-0.183831	2
00000020_7.tif	CX7389	Control	19.076	7.284	4.52623	6.02647	1.50024	1	0.295	1.77781	0.442571	2
00000020_7.tif	CX7389	Control	13.271	8.021	4.52623	3.96002	-0.566205	0	0.295	1.16821	-0.167031	2
00000020_7.tif	CX7389	Control	13.334	8.222	4.52623	3.75099	-0.775235	0	0.295	1.10654	-0.228694	2
00000020_7.tif	CX7389	Control	14.491	8.588	4.52623	3.06951	-1.45672	0	0.295	0.905504	-0.429733	2
00000020_7.tif	CX7389	Control	15.75	8.823	4.52623	2.93258	-1.59364	0	0.295	0.865112	-0.470125	2
00000020_7.tif	CX7389	Control	13.562	9.086	4.52623	2.87487	-1.65136	0	0.295	0.848086	-0.487152	2
00000020_7.tif	CX7389	Control	13.147	9.715	4.52623	2.59687	-1.92936	0	0.295	0.766077	-0.56916	2
00000020_7.tif	CX7389	Control	17.155	9.851	4.52623	2.87147	-1.65476	0	0.295	0.847085	-0.488153	2
00000020_7.tif	CX7389	Control	15.496	10.599	4.52623	1.19037	-3.33586	0	0.295	0.35116	-0.984078	2
00000020_7.tif	CX7389	Control	15.36	10.803	4.52623	0.945838	-3.58039	0	0.295	0.279022	-1.05622	2
00000020_7.tif	CX7389	Control	15.106	10.976	4.52623	0.685377	-3.84085	0	0.295	0.202186	-1.13305	2
00000020_7.tif	CX7389	Control	12.756	10.99	4.52623	2.23844	-2.28779	0	0.295	0.660341	-0.674897	2
00000020_7.tif	CX7389	Control	12.527	11.031	4.52623	2.4484	-2.07783	0	0.295	0.722279	-0.612958	2
00000020_7.tif	CX7389	Control	16.651	11.563	4.52623	1.75128	-2.77495	0	0.295	0.516628	-0.818609	2
00000020_7.tif	CX7389	Control	11.749	11.927	4.52623	3.16596	-1.36027	0	0.295	0.933959	-0.401279	2
00000020_7.tif	CX7389	Control	13.286	11.948	4.52623	1.64601	-2.88022	0	0.295	0.485573	-0.849664	2
00000020_7.tif	CX7389	Control	13.403	12.193	4.52623	1.6003	-2.92592	0	0.295	0.47209	-0.863148	2
00000020_7.tif	CX7389	Control	12.886	12.221	4.52623	2.09988	-2.42635	0	0.295	0.619465	-0.715772	2
00000020_7.tif	CX7389	Control	12.048	12.337	4.52623	2.9393	-1.58693	0	0.295	0.867092	-0.468145	2
00000020_7.tif	CX7389	Control	15.94	12.343	4.52623	1.26012	-3.26611	0	0.295	0.371734	-0.963503	2
00000020_7.tif	CX7389	Control	15.901	12.602	4.52623	1.39456	-3.13167	0	0.295	0.411394	-0.923844	2
00000020_7.tif	CX7389	Control	12.149	12.638	4.52623	2.9308	-1.59543	0	0.295	0.864585	-0.470652	2
00000020_7.tif	CX7389	Control	17.84	12.807	4.52623	3.16592	-1.36031	0	0.295	0.933946	-0.401291	2
00000020_7.tif	CX7389	Control	11.84	12.891	4.52623	3.31057	-1.21566	0	0.295	0.976617	-0.358621	2
00000020_7.tif	CX7389	Control	18.567	12.946	4.52623	3.89505	-0.631179	0	0.295	1.14904	-0.186198	2
00000020_7.tif	CX7389	Control	16.698	12.964	4.52623	2.23803	-2.2882	0	0.295	0.660218	-0.675019	2
00000020_7.tif	CX7389	Control	13.007	13.078	4.52623	2.3841	-2.14213	0	0.295	0.70331	-0.631927	2
00000020_7.tif	CX7389	Control	12.179	13.185	4.52623	3.13485	-1.39137	0	0.295	0.924782	-0.410455	2
00000020_7.tif	CX7389	Control	17.392	13.298	4.52623	2.99788	-1.52834	0	0.295	0.884376	-0.450862	2
00000020_7.tif	CX7389	Control	12.218	13.489	4.52623	3.2641	-1.26213	0	0.295	0.96291	-0.372327	2
00000020_7.tif	CX7389	Control	11.903	13.532	4.52623	3.55044	-0.975791	0	0.295	1.04738	-0.287858	2
00000020_7.tif	CX7389	Control	12.599	13.557	4.52623	3.00209	-1.52414	0	0.295	0.885616	-0.449621	2
00000020_7.tif	CX7389	Control	17.929	14.014	4.52623	3.85386	-0.672368	0	0.295	1.13689	-0.198349	2
00000020_7.tif	CX7389	Control	15.938	14.255	4.52623	2.82241	-1.70382	0	0.295	0.832611	-0.502627	2
00000020_7.tif	CX7389	Control	17.246	14.291	4.52623	3.54682	-0.979406	0	0.295	1.04631	-0.288925	2
00000020_7.tif	CX7389	Control	15.877	14.348	4.52623	2.88792	-1.63831	0	0.295	0.851937	-0.4833	2
00000020_7.tif	CX7389	Control	13.35	14.544	4.52623	3.30106	-1.22517	0	0.295	0.973813	-0.361425	2
00000020_7.tif	CX7389	Control	15.127	14.765	4.52623	3.14314	-1.38309	0	0.295	0.927225	-0.408012	2
00000020_7.tif	CX7389	Control	15.244	14.833	4.52623	3.22131	-1.30492	0	0.295	0.950287	-0.38495	2
00000020_7.tif	CX7389	Control	19.433	20.294	4.52623	9.77773	5.2515	1	0.295	2.88443	1.54919	2
00000004_6.tif	CX7389	Control	15.318	2.21	3.96898	10.225	6.25599	1	0.295	3.01637	1.84552	2
00000004_6.tif	CX7389	Control	5.943	6.36	3.96898	8.6158	4.64681	1	0.295	2.54166	1.37081	2
00000004_6.tif	CX7389	Control	10.074	9.116	3.96898	3.74533	-0.223651	0	0.295	1.10487	-0.0659771	2
00000004_6.tif	CX7389	Control	9.548	9.59	3.96898	3.77649	-0.192497	0	0.295	1.11406	-0.0567865	2
00000004_6.tif	CX7389	Control	14.723	9.963	3.96898	3.07516	-0.893828	0	0.295	0.907171	-0.263679	2
00000004_6.tif	CX7389	Control	12.074	10.256	3.96898	1.80214	-2.16684	0	0.295	0.531632	-0.639218	2
00000004_6.tif	CX7389	Control	11.743	10.442	3.96898	1.72519	-2.2438	0	0.295	0.50893	-0.661921	2
00000004_6.tif	CX7389	Control	11.996	10.442	3.96898	1.6397	-2.32929	0	0.295	0.483711	-0.68714	2
00000004_6.tif	CX7389	Control	16.506	10.503	3.96898	4.342	0.373014	1	0.295	1.28089	0.110039	2
00000004_6.tif	CX7389	Control	12.171	10.539	3.96898	1.50586	-2.46312	0	0.295	0.444229	-0.726622	2
00000004_6.tif	CX7389	Control	9.102	10.684	3.96898	3.59395	-0.375036	0	0.295	1.06021	-0.110636	2
00000004_6.tif	CX7389	Control	12.969	10.814	3.96898	1.31864	-2.65035	0	0.295	0.388999	-0.781852	2
00000004_6.tif	CX7389	Control	10.193	10.931	3.96898	2.49562	-1.47336	0	0.295	0.736208	-0.434642	2
00000004_6.tif	CX7389	Control	14.847	10.961	3.96898	2.6319	-1.33709	0	0.295	0.77641	-0.394441	2
00000004_6.tif	CX7389	Control	16.202	11.702	3.96898	3.77749	-0.191491	0	0.295	1.11436	-0.0564899	2
00000004_6.tif	CX7389	Control	10.692	11.717	3.96898	1.77227	-2.19672	0	0.295	0.522819	-0.648032	2
00000004_6.tif	CX7389	Control	13.343	11.718	3.96898	0.954376	-3.01461	0	0.295	0.281541	-0.889309	2
00000004_6.tif	CX7389	Control	16.04	11.758	3.96898	3.61159	-0.357396	0	0.295	1.06542	-0.105432	2
00000004_6.tif	CX7389	Control	16.124	11.839	3.96898	3.69049	-0.278494	0	0.295	1.08869	-0.0821557	2
00000004_6.tif	CX7389	Control	11.917	11.852	3.96898	0.547724	-3.42126	0	0.295	0.161579	-1.00927	2
00000004_6.tif	CX7389	Control	13.747	12.057	3.96898	1.30949	-2.65949	0	0.295	0.386301	-0.784549	2
00000004_6.tif	CX7389	Control	13.922	12.057	3.96898	1.48444	-2.48455	0	0.295	0.437909	-0.732942	2
00000004_6.tif	CX7389	Control	19.04	12.212	3.96898	6.60476	2.63578	1	0.295	1.9484	0.777554	2
00000004_6.tif	CX7389	Control	12.985	12.783	3.96898	0.938005	-3.03098	0	0.295	0.276711	-0.894139	2
00000004_6.tif	CX7389	Control	15.639	12.798	3.96898	3.29395	-0.675031	0	0.295	0.971716	-0.199134	2
00000004_6.tif	CX7389	Control	14.63	12.942	3.96898	2.37763	-1.59136	0	0.295	0.7014	-0.469451	2
00000004_6.tif	CX7389	Control	15.498	13.534	3.96898	3.41362	-0.555369	0	0.295	1.00702	-0.163834	2
00000004_6.tif	CX7389	Control	14.323	13.615	3.96898	2.46862	-1.50037	0	0.295	0.728241	-0.442609	2
00000004_6.tif	CX7389	Control	15.324	13.773	3.96898	3.37617	-0.592818	0	0.295	0.995969	-0.174881	2
00000004_6.tif	CX7389	Control	13.205	14.314	3.96898	2.41788	-1.55111	0	0.295	0.713274	-0.457576	2
00000004_6.tif	CX7389	Control	13.41	14.892	3.96898	3.03108	-0.937908	0	0.295	0.894168	-0.276683	2
00000004_6.tif	CX7389	Control	19.209	15.099	3.96898	7.43778	3.46879	1	0.295	2.19414	1.02329	2
00000004_6.tif	CX7389	Control	18.364	15.292	3.96898	6.76882	2.79983	1	0.295	1.9968	0.825951	2
00000004_6.tif	CX7389	Control	16.554	17.165	3.96898	6.58803	2.61905	1	0.295	1.94347	0.77262	2
00000004_6.tif	CX7389	Control	16.641	17.251	3.96898	6.70955	2.74057	1	0.295	1.97932	0.808468	2
00000020_6.tif	CX7389	Control	16.743	6.866	4.5992	4.52236	-0.0768365	0	0.295	1.3341	-0.0226668	2
00000020_6.tif	CX7389	Control	16.175	7.393	4.5992	3.81206	-0.787138	0	0.295	1.12456	-0.232206	2
00000020_6.tif	CX7389	Control	11.355	7.509	4.5992	4.85429	0.255088	1	0.295	1.43202	0.0752509	2
00000020_6.tif	CX7389	Control	10.968	7.946	4.5992	4.85378	0.254574	1	0.295	1.43186	0.0750995	2
00000020_6.tif	CX7389	Control	16.259	7.949	4.5992	3.33673	-1.26247	0	0.295	0.984335	-0.372429	2
00000020_6.tif	CX7389	Control	15.773	8.023	4.5992	3.0823	-1.5169	0	0.295	0.909278	-0.447486	2
00000020_6.tif	CX7389	Control	11.369	8.17	4.5992	4.40062	-0.198585	0	0.295	1.29818	-0.0585826	2
00000020_6.tif	CX7389	Control	16.609	8.451	4.5992	3.08762	-1.51158	0	0.295	0.910848	-0.445917	2
00000020_6.tif	CX7389	Control	16.939	8.544	4.5992	3.22345	-1.37575	0	0.295	0.950917	-0.405847	2
00000020_6.tif	CX7389	Control	14.486	9.408	4.5992	1.56404	-3.03516	0	0.295	0.461392	-0.895372	2
00000020_6.tif	CX7389	Control	12.047	9.424	4.5992	3.13201	-1.46719	0	0.295	0.923943	-0.432821	2
00000020_6.tif	CX7389	Control	14.656	9.603	4.5992	1.34629	-3.25291	0	0.295	0.397156	-0.959608	2
00000020_6.tif	CX7389	Control	16.26	10.886	4.5992	1.4751	-3.1241	0	0.295	0.435155	-0.921609	2
00000020_6.tif	CX7389	Control	17.468	11.696	4.5992	2.7857	-1.8135	0	0.295	0.821782	-0.534982	2
00000020_6.tif	CX7389	Control	9.041	11.882	4.5992	5.82123	1.22203	1	0.295	1.71726	0.360499	2
00000020_6.tif	CX7389	Control	9.044	11.994	4.5992	5.83739	1.23819	1	0.295	1.72203	0.365267	2
00000020_6.tif	CX7389	Control	17.56	12.129	4.5992	3.0169	-1.5823	0	0.295	0.889985	-0.466779	2
00000020_6.tif	CX7389	Control	15.41	12.186	4.5992	1.39084	-3.20836	0	0.295	0.410297	-0.946468	2
00000020_6.tif	CX7389	Control	12.526	12.242	4.5992	2.60672	-1.99248	0	0.295	0.768983	-0.587781	2
00000020_6.tif	CX7389	Control	12.674	12.344	4.5992	2.53443	-2.06477	0	0.295	0.747657	-0.609107	2
00000020_6.tif	CX7389	Control	17.518	13.154	4.5992	3.51459	-1.08461	0	0.295	1.0368	-0.31996	2
00000020_6.tif	CX7389	Control	13.403	13.357	4.5992	2.7821	-1.8171	0	0.295	0.82072	-0.536044	2
00000020_6.tif	CX7389	Control	12.169	13.528	4.5992	3.67844	-0.920762	0	0.295	1.08514	-0.271625	2
00000020_6.tif	CX7389	Control	11.798	13.988	4.5992	4.26617	-0.333035	0	0.295	1.25852	-0.0982453	2
00000020_6.tif	CX7389	Control	15.938	13.995	4.5992	3.26218	-1.33702	0	0.295	0.962343	-0.394422	2
00000020_6.tif	CX7389	Control	12.204	14.074	4.5992	4.05831	-0.54089	0	0.295	1.1972	-0.159563	2
00000020_6.tif	CX7389	Control	15.323	14.083	4.5992	3.18559	-1.41361	0	0.295	0.939748	-0.417016	2
00000020_6.tif	CX7389	Control	16.561	14.536	4.5992	4.00753	-0.591674	0	0.295	1.18222	-0.174544	2
00000020_6.tif	CX7389	Control	15.587	14.65	4.5992	3.79255	-0.806649	0	0.295	1.1188	-0.237961	2
00000020_6.tif	CX7389	Control	12.705	15.437	4.5992	4.95243	0.353233	1	0.295	1.46097	0.104204	2
00000020_6.tif	CX7389	Control	14.341	15.604	4.5992	4.68219	0.0829939	1	0.295	1.38125	0.0244832	2
00000020_6.tif	CX7389	Control	14.752	15.969	4.5992	5.02612	0.426914	1	0.295	1.4827	0.12594	2
00000020_6.tif	CX7389	Control	14.589	15.976	4.5992	5.03685	0.437653	1	0.295	1.48587	0.129108	2
00000020_6.tif	CX7389	Control	14.513	16.051	4.5992	5.11529	0.516089	1	0.295	1.50901	0.152246	2
00000020_6.tif	CX7389	Control	14.724	16.065	4.5992	5.12238	0.523175	1	0.295	1.5111	0.154336	2
00000020_6.tif	CX7389	Control	14.314	16.073	4.5992	5.15167	0.552467	1	0.295	1.51974	0.162978	2
00000020_6.tif	CX7389	Control	14.678	16.171	4.5992	5.22912	0.629915	1	0.295	1.54259	0.185825	2
00000002_5.tif	CX7389	Control	12.516	8.925	4.3984	3.3177	-1.0807	0	0.295	0.978721	-0.318807	2
00000002_5.tif	CX7389	Control	14.609	10.361	4.3984	1.82509	-2.57331	0	0.295	0.538403	-0.759125	2
00000002_5.tif	CX7389	Control	16.879	10.637	4.3984	3.37598	-1.02242	0	0.295	0.995915	-0.301613	2
00000002_5.tif	CX7389	Control	14.384	11.611	4.3984	0.707987	-3.69041	0	0.295	0.208856	-1.08867	2
00000002_5.tif	CX7389	Control	11.244	12.389	4.3984	2.57312	-1.82528	0	0.295	0.759071	-0.538456	2
00000002_5.tif	CX7389	Control	16.036	12.498	4.3984	2.30663	-2.09176	0	0.295	0.680457	-0.617071	2
00000002_5.tif	CX7389	Control	14.781	12.835	4.3984	1.30539	-3.09301	0	0.295	0.385091	-0.912437	2
00000002_5.tif	CX7389	Control	16.94	13.285	4.3984	3.40951	-0.988892	0	0.295	1.0058	-0.291723	2
00000002_5.tif	CX7389	Control	15.82	14.674	4.3984	3.36764	-1.03076	0	0.295	0.993454	-0.304074	2
00000002_5.tif	CX7389	Control	15.223	14.742	4.3984	3.10459	-1.29381	0	0.295	0.915854	-0.381674	2
00000002_5.tif	CX7389	Control	13.329	16.427	4.3984	4.46047	0.0620731	1	0.295	1.31584	0.0183116	2
00000016_6.tif	CX7389	Control	11.944	0.838	5.28971	11.8563	6.56661	1	0.295	3.49761	1.93715	2
00000016_6.tif	CX7389	Control	7.652	3.207	5.28971	11.4321	6.14239	1	0.295	3.37247	1.812	2
00000016_6.tif	CX7389	Control	12.77	8.694	5.28971	4.08184	-1.20787	0	0.295	1.20414	-0.356322	2
00000016_6.tif	CX7389	Control	12.971	8.706	5.28971	3.9948	-1.29491	0	0.295	1.17847	-0.381998	2
00000016_6.tif	CX7389	Control	12.604	8.804	5.28971	4.05182	-1.23789	0	0.295	1.19529	-0.365178	2
00000016_6.tif	CX7389	Control	12.13	9.932	5.28971	3.37858	-1.91113	0	0.295	0.996681	-0.563784	2
00000016_6.tif	CX7389	Control	13.893	9.964	5.28971	2.52462	-2.76509	0	0.295	0.744762	-0.815703	2
00000016_6.tif	CX7389	Control	11.778	10.299	5.28971	3.38072	-1.90899	0	0.295	0.997311	-0.563153	2
00000016_6.tif	CX7389	Control	12.193	11.417	5.28971	2.4281	-2.86161	0	0.295	0.716288	-0.844176	2
00000016_6.tif	CX7389	Control	18.181	12.322	5.28971	3.78678	-1.50293	0	0.295	1.1171	-0.443365	2
00000016_6.tif	CX7389	Control	13.339	15.172	5.28971	2.93121	-2.3585	0	0.295	0.864708	-0.695757	2
00000016_6.tif	CX7389	Control	13.894	15.213	5.28971	2.82004	-2.46967	0	0.295	0.831912	-0.728552	2
00000016_6.tif	CX7389	Control	13.819	15.289	5.28971	2.9088	-2.38091	0	0.295	0.858097	-0.702368	2
00000016_6.tif	CX7389	Control	13.82	15.424	5.28971	3.04105	-2.24866	0	0.295	0.897109	-0.663355	2
00000016_6.tif	CX7389	Control	13.232	16.487	5.28971	4.21299	-1.07672	0	0.295	1.24283	-0.317632	2
00000016_6.tif	CX7389	Control	16.044	16.482	5.28971	4.3669	-0.922807	0	0.295	1.28824	-0.272228	2
00000006_1.tif	CX7389	Control	16.111	6.539	4.38789	3.80696	-0.580934	0	0.295	1.12305	-0.171376	2
00000006_1.tif	CX7389	Control	12.962	7.257	4.38789	3.91221	-0.47568	0	0.295	1.1541	-0.140326	2
00000006_1.tif	CX7389	Control	16.888	7.774	4.38789	2.90046	-1.48744	0	0.295	0.855634	-0.438794	2
00000006_1.tif	CX7389	Control	14.214	8.686	4.38789	2.01449	-2.3734	0	0.295	0.594275	-0.700154	2
00000006_1.tif	CX7389	Control	19.136	10.361	4.38789	3.69876	-0.689133	0	0.295	1.09113	-0.203294	2
00000006_1.tif	CX7389	Control	17.248	11.205	4.38789	2.02994	-2.35795	0	0.295	0.598833	-0.695596	2
00000006_1.tif	CX7389	Control	16.99	11.359	4.38789	1.8868	-2.50109	0	0.295	0.556607	-0.737821	2
00000006_1.tif	CX7389	Control	17.396	11.352	4.38789	2.22938	-2.15852	0	0.295	0.657666	-0.636763	2
00000006_1.tif	CX7389	Control	16.965	11.53	4.38789	1.96958	-2.41831	0	0.295	0.581028	-0.713401	2
00000006_1.tif	CX7389	Control	15.529	12.204	4.38789	1.92016	-2.46774	0	0.295	0.566446	-0.727982	2
00000006_1.tif	CX7389	Control	16.285	12.667	4.38789	2.52717	-1.86073	0	0.295	0.745514	-0.548915	2
00000006_1.tif	CX7389	Control	16.063	12.989	4.38789	2.77432	-1.61358	0	0.295	0.818423	-0.476005	2
00000006_1.tif	CX7389	Control	13.878	13.888	4.38789	3.9253	-0.462591	0	0.295	1.15796	-0.136464	2
00000006_1.tif	CX7389	Control	15.635	14.327	4.38789	4.0458	-0.342095	0	0.295	1.19351	-0.100918	2
00000006_1.tif	CX7389	Control	14.526	14.389	4.38789	4.20314	-0.184757	0	0.295	1.23993	-0.0545035	2
0000023_10.tif	CX7389	Control	9.908	6.501	4.69787	6.35689	1.65901	1	0.295	1.87528	0.489409	2
0000023_10.tif	CX7389	Control	11.305	7.603	4.69787	4.69554	-0.00232961	0	0.295	1.38519	-0.000687234	2
0000023_10.tif	CX7389	Control	11.728	8.858	4.69787	3.39151	-1.30637	0	0.295	1.00049	-0.385378	2
0000023_10.tif	CX7389	Control	11.5	8.937	4.69787	3.44718	-1.2507	0	0.295	1.01692	-0.368955	2
0000023_10.tif	CX7389	Control	8.873	8.964	4.69787	5.37272	0.674846	1	0.295	1.58495	0.19908	2
0000023_10.tif	CX7389	Control	15.605	9.877	4.69787	2.87713	-1.82075	0	0.295	0.848753	-0.53712	2
0000023_10.tif	CX7389	Control	17.133	9.981	4.69787	4.10112	-0.596749	0	0.295	1.20983	-0.176041	2
0000023_10.tif	CX7389	Control	11.28	11.177	4.69787	2.25056	-2.44731	0	0.295	0.663916	-0.721956	2
0000023_10.tif	CX7389	Control	14.981	13.057	4.69787	1.99456	-2.70331	0	0.295	0.588395	-0.797478	2
0000023_10.tif	CX7389	Control	10.749	13.682	4.69787	3.30127	-1.3966	0	0.295	0.973875	-0.411997	2
0000023_10.tif	CX7389	Control	14.385	14.145	4.69787	2.54292	-2.15495	0	0.295	0.750163	-0.63571	2
0000023_10.tif	CX7389	Control	11.673	16.69	4.69787	5.22005	0.522175	1	0.295	1.53991	0.154042	2
0000023_10.tif	CX7389	Control	19.318	17.233	4.69787	8.01132	3.31344	1	0.295	2.36334	0.977466	2
00000027_7.tif	CX7389	Control	14.331	5.662	4.40115	6.08837	1.68722	1	0.295	1.79607	0.49773	2
00000027_7.tif	CX7389	Control	10.946	5.974	4.40115	7.07007	2.66892	1	0.295	2.08567	0.787332	2
00000027_7.tif	CX7389	Control	7.605	6.21	4.40115	9.2835	4.88235	1	0.295	2.73863	1.44029	2
00000027_7.tif	CX7389	Control	7.427	6.365	4.40115	9.33812	4.93697	1	0.295	2.75475	1.45641	2
00000027_7.tif	CX7389	Control	8.452	6.443	4.40115	8.46861	4.06746	1	0.295	2.49824	1.1999	2
00000027_7.tif	CX7389	Control	11.349	6.456	4.40115	6.44349	2.04234	1	0.295	1.90083	0.602492	2
00000027_7.tif	CX7389	Control	15.049	8.418	4.40115	3.28524	-1.11591	0	0.295	0.969147	-0.329192	2
00000027_7.tif	CX7389	Control	19.061	8.889	4.40115	4.86779	0.466641	1	0.295	1.436	0.137659	2
00000027_7.tif	CX7389	Control	18.891	8.934	4.40115	4.70346	0.302314	1	0.295	1.38752	0.0891827	2
00000027_7.tif	CX7389	Control	13.295	8.956	4.40115	3.28092	-1.12023	0	0.295	0.967872	-0.330467	2
00000027_7.tif	CX7389	Control	13.174	8.968	4.40115	3.33878	-1.06237	0	0.295	0.98494	-0.313399	2
00000027_7.tif	CX7389	Control	19.205	9.154	4.40115	4.84137	0.44022	1	0.295	1.4282	0.129865	2
00000027_7.tif	CX7389	Control	13.248	9.259	4.40115	3.05981	-1.34134	0	0.295	0.902643	-0.395696	2
00000027_7.tif	CX7389	Control	16.509	9.949	4.40115	2.25675	-2.1444	0	0.295	0.665741	-0.632598	2
00000027_7.tif	CX7389	Control	17.754	9.959	4.40115	3.18493	-1.21622	0	0.295	0.939554	-0.358785	2
00000027_7.tif	CX7389	Control	11.256	10.585	4.40115	3.99272	-0.408429	0	0.295	1.17785	-0.120487	2
00000027_7.tif	CX7389	Control	11.393	10.918	4.40115	3.77844	-0.622705	0	0.295	1.11464	-0.183698	2
00000027_7.tif	CX7389	Control	11.725	11.19	4.40115	3.40289	-0.998258	0	0.295	1.00385	-0.294486	2
00000027_7.tif	CX7389	Control	17.272	11.662	4.40115	2.18338	-2.21776	0	0.295	0.644099	-0.65424	2
00000027_7.tif	CX7389	Control	12.287	12.204	4.40115	2.84644	-1.55471	0	0.295	0.839699	-0.45864	2
00000027_7.tif	CX7389	Control	12.993	12.411	4.40115	2.21235	-2.1888	0	0.295	0.652642	-0.645697	2
00000027_7.tif	CX7389	Control	13.154	12.603	4.40115	2.13406	-2.26709	0	0.295	0.629549	-0.66879	2
00000027_7.tif	CX7389	Control	12.147	12.728	4.40115	3.11544	-1.28571	0	0.295	0.919056	-0.379283	2
00000027_7.tif	CX7389	Control	12.042	12.787	4.40115	3.23408	-1.16707	0	0.295	0.954053	-0.344286	2
00000027_7.tif	CX7389	Control	15.086	13.467	4.40115	1.764	-2.63715	0	0.295	0.520381	-0.777958	2
00000027_7.tif	CX7389	Control	15.161	13.698	4.40115	1.9963	-2.40485	0	0.295	0.588908	-0.709431	2
00000027_7.tif	CX7389	Control	12.945	13.86	4.40115	3.04128	-1.35987	0	0.295	0.897178	-0.401161	2
00000027_7.tif	CX7389	Control	13.671	14.884	4.40115	3.48274	-0.918408	0	0.295	1.02741	-0.27093	2
00000027_7.tif	CX7389	Control	15.53	19.892	4.40115	8.20087	3.79972	1	0.295	2.41926	1.12092	2
0000001_13.tif	CX7389	Control	16.201	8.597	4.46887	3.07217	-1.3967	0	0.295	0.90629	-0.412026	3
0000001_13.tif	CX7389	Control	15.536	8.63	4.46887	2.70496	-1.76391	0	0.295	0.797963	-0.520352	3
0000001_13.tif	CX7389	Control	14.642	8.76	4.46887	2.33599	-2.13288	0	0.295	0.689117	-0.629199	3
0000001_13.tif	CX7389	Control	16.101	8.847	4.46887	2.81189	-1.65698	0	0.295	0.829507	-0.488808	3
0000001_13.tif	CX7389	Control	16.763	8.908	4.46887	3.21455	-1.25432	0	0.295	0.948291	-0.370024	3
0000001_13.tif	CX7389	Control	16.625	9.026	4.46887	3.0331	-1.43577	0	0.295	0.894764	-0.423551	3
0000001_13.tif	CX7389	Control	16.796	9.12	4.46887	3.10054	-1.36832	0	0.295	0.91466	-0.403655	3
0000001_13.tif	CX7389	Control	14.565	9.118	4.46887	1.97225	-2.49661	0	0.295	0.581815	-0.7365	3
0000001_13.tif	CX7389	Control	16.949	9.253	4.46887	3.14113	-1.32773	0	0.295	0.926634	-0.391682	3
0000001_13.tif	CX7389	Control	16.055	9.298	4.46887	2.43691	-2.03196	0	0.295	0.718887	-0.599428	3
0000001_13.tif	CX7389	Control	16.802	9.362	4.46887	2.95815	-1.51071	0	0.295	0.872656	-0.44566	3
0000001_13.tif	CX7389	Control	16.931	9.448	4.46887	3.01653	-1.45234	0	0.295	0.889876	-0.428439	3
0000001_13.tif	CX7389	Control	17.083	9.471	4.46887	3.13345	-1.33542	0	0.295	0.924368	-0.393947	3
0000001_13.tif	CX7389	Control	12.747	9.467	4.46887	2.30882	-2.16004	0	0.295	0.681102	-0.637213	3
0000001_13.tif	CX7389	Control	17.933	9.512	4.46887	3.8702	-0.598671	0	0.295	1.14171	-0.176608	3
0000001_13.tif	CX7389	Control	16.79	9.513	4.46887	2.86289	-1.60598	0	0.295	0.844552	-0.473763	3
0000001_13.tif	CX7389	Control	16.99	9.556	4.46887	3.01008	-1.45879	0	0.295	0.887973	-0.430343	3
0000001_13.tif	CX7389	Control	12.667	9.648	4.46887	2.24692	-2.22194	0	0.295	0.662842	-0.655473	3
0000001_13.tif	CX7389	Control	16.581	10.1	4.46887	2.39594	-2.07293	0	0.295	0.706801	-0.611514	3
0000001_13.tif	CX7389	Control	12.077	10.193	4.46887	2.48392	-1.98495	0	0.295	0.732757	-0.585559	3
0000001_13.tif	CX7389	Control	15.67	10.273	4.46887	1.50969	-2.95917	0	0.295	0.44536	-0.872956	3
0000001_13.tif	CX7389	Control	11.426	10.324	4.46887	3.06545	-1.40342	0	0.295	0.904308	-0.414008	3
0000001_13.tif	CX7389	Control	10.512	10.68	4.46887	3.90485	-0.564014	0	0.295	1.15193	-0.166384	3
0000001_13.tif	CX7389	Control	10.434	10.699	4.46887	3.98057	-0.488301	0	0.295	1.17427	-0.144049	3
0000001_13.tif	CX7389	Control	15.75	10.737	4.46887	1.39751	-3.07136	0	0.295	0.412265	-0.90605	3
0000001_13.tif	CX7389	Control	15.453	10.818	4.46887	1.08971	-3.37915	0	0.295	0.321465	-0.99685	3
0000001_13.tif	CX7389	Control	15.6	10.811	4.46887	1.23434	-3.23452	0	0.295	0.364131	-0.954185	3
0000001_13.tif	CX7389	Control	11.575	10.847	4.46887	2.83085	-1.63801	0	0.295	0.835102	-0.483213	3
0000001_13.tif	CX7389	Control	10.418	10.864	4.46887	3.98402	-0.484842	0	0.295	1.17529	-0.143028	3
0000001_13.tif	CX7389	Control	15.263	11.011	4.46887	0.869984	-3.59888	0	0.295	0.256645	-1.06167	3
0000001_13.tif	CX7389	Control	14.92	11.207	4.46887	0.538472	-3.93039	0	0.295	0.158849	-1.15947	3
0000001_13.tif	CX7389	Control	16.013	11.386	4.46887	1.64514	-2.82372	0	0.295	0.485317	-0.832998	3
0000001_13.tif	CX7389	Control	15.794	11.624	4.46887	1.49903	-2.96984	0	0.295	0.442213	-0.876102	3
0000001_13.tif	CX7389	Control	11.516	11.702	4.46887	2.94577	-1.5231	0	0.295	0.869002	-0.449313	3
0000001_13.tif	CX7389	Control	17.318	11.711	4.46887	2.98872	-1.48014	0	0.295	0.881673	-0.436642	3
0000001_13.tif	CX7389	Control	15.753	11.773	4.46887	1.52235	-2.94652	0	0.295	0.449093	-0.869222	3
0000001_13.tif	CX7389	Control	17.711	12.167	4.46887	3.48773	-0.981133	0	0.295	1.02888	-0.289434	3
0000001_13.tif	CX7389	Control	17.409	12.304	4.46887	3.251	-1.21786	0	0.295	0.959045	-0.35927	3
0000001_13.tif	CX7389	Control	17.062	12.507	4.46887	3.02247	-1.44639	0	0.295	0.891629	-0.426686	3
0000001_13.tif	CX7389	Control	17.031	12.644	4.46887	3.06267	-1.4062	0	0.295	0.903488	-0.414828	3
0000001_13.tif	CX7389	Control	16.584	12.725	4.46887	2.7356	-1.73327	0	0.295	0.807002	-0.511313	3
0000001_13.tif	CX7389	Control	11.771	12.831	4.46887	3.15375	-1.31512	0	0.295	0.930356	-0.38796	3
0000001_13.tif	CX7389	Control	12.324	14.009	4.46887	3.58534	-0.883526	0	0.295	1.05768	-0.26064	3
0000001_13.tif	CX7389	Control	12.199	14.092	4.46887	3.72571	-0.743159	0	0.295	1.09908	-0.219232	3
0000001_13.tif	CX7389	Control	12.584	14.261	4.46887	3.65828	-0.810584	0	0.295	1.07919	-0.239122	3
0000001_13.tif	CX7389	Control	12.745	14.258	4.46887	3.57861	-0.890259	0	0.295	1.05569	-0.262626	3
0000001_13.tif	CX7389	Control	14.528	14.596	4.46887	3.51548	-0.953387	0	0.295	1.03707	-0.281249	3
0000001_13.tif	CX7389	Control	13.068	14.661	4.46887	3.8165	-0.652366	0	0.295	1.12587	-0.192448	3
0000001_13.tif	CX7389	Control	14.772	15.034	4.46887	3.96885	-0.500015	0	0.295	1.17081	-0.147504	3
0000001_13.tif	CX7389	Control	13.789	15.112	4.46887	4.07447	-0.394398	0	0.295	1.20197	-0.116347	3
0000007_13.tif	CX7389	Control	13.49	6.827	4.74999	4.61301	-0.136989	0	0.295	1.36084	-0.0404116	3
0000007_13.tif	CX7389	Control	15.747	8.275	4.74999	3.96623	-0.783759	0	0.295	1.17004	-0.231209	3
0000007_13.tif	CX7389	Control	15.63	8.291	4.74999	3.88378	-0.866209	0	0.295	1.14572	-0.255532	3
0000007_13.tif	CX7389	Control	15.698	9.042	4.74999	3.35189	-1.39811	0	0.295	0.988807	-0.412441	3
0000007_13.tif	CX7389	Control	13.625	9.252	4.74999	2.20273	-2.54726	0	0.295	0.649807	-0.751442	3
0000007_13.tif	CX7389	Control	13.53	9.327	4.74999	2.11832	-2.63167	0	0.295	0.624906	-0.776343	3
0000007_13.tif	CX7389	Control	13.924	9.709	4.74999	1.82053	-2.92946	0	0.295	0.537057	-0.864191	3
0000007_13.tif	CX7389	Control	14.583	10.258	4.74999	1.70377	-3.04622	0	0.295	0.502613	-0.898635	3
0000007_13.tif	CX7389	Control	17.12	10.844	4.74999	3.81256	-0.937437	0	0.295	1.1247	-0.276544	3
0000007_13.tif	CX7389	Control	17.005	11.031	4.74999	3.67362	-1.07638	0	0.295	1.08372	-0.317532	3
0000007_13.tif	CX7389	Control	9.817	11.209	4.74999	3.54441	-1.20559	0	0.295	1.0456	-0.355649	3
0000007_13.tif	CX7389	Control	12.914	11.253	4.74999	0.47731	-4.27268	0	0.295	0.140807	-1.26044	3
0000007_13.tif	CX7389	Control	17.275	11.391	4.74999	3.92128	-0.828712	0	0.295	1.15678	-0.24447	3
0000007_13.tif	CX7389	Control	17.161	11.979	4.74999	3.84525	-0.904746	0	0.295	1.13435	-0.2669	3
0000007_13.tif	CX7389	Control	12.617	12.228	4.74999	1.0804	-3.66959	0	0.295	0.318719	-1.08253	3
0000007_13.tif	CX7389	Control	9.65	12.436	4.74999	3.83609	-0.913899	0	0.295	1.13165	-0.2696	3
0000007_13.tif	CX7389	Control	16.398	12.492	4.74999	3.22131	-1.52868	0	0.295	0.950287	-0.450961	3
0000007_13.tif	CX7389	Control	15.126	12.621	4.74999	2.1306	-2.61939	0	0.295	0.628528	-0.77272	3
0000007_13.tif	CX7389	Control	13.427	12.839	4.74999	1.4029	-3.34709	0	0.295	0.413856	-0.987393	3
0000007_13.tif	CX7389	Control	13.333	12.852	4.74999	1.41416	-3.33584	0	0.295	0.417176	-0.984072	3
0000007_13.tif	CX7389	Control	9.499	12.944	4.74999	4.13873	-0.611267	0	0.295	1.22092	-0.180324	3
0000007_13.tif	CX7389	Control	17.201	13.419	4.74999	4.3271	-0.422897	0	0.295	1.27649	-0.124755	3
0000007_13.tif	CX7389	Control	12.397	13.441	4.74999	2.21988	-2.53012	0	0.295	0.654864	-0.746384	3
0000007_13.tif	CX7389	Control	13.906	13.55	4.74999	2.18294	-2.56705	0	0.295	0.643969	-0.757279	3
0000007_13.tif	CX7389	Control	12.341	13.574	4.74999	2.36404	-2.38596	0	0.295	0.697391	-0.703858	3
0000007_13.tif	CX7389	Control	17.248	13.589	4.74999	4.4486	-0.301394	0	0.295	1.31234	-0.0889113	3
0000007_13.tif	CX7389	Control	14.884	13.711	4.74999	2.73997	-2.01003	0	0.295	0.808291	-0.592957	3
0000007_13.tif	CX7389	Control	17.292	13.718	4.74999	4.55041	-0.199582	0	0.295	1.34237	-0.0588768	3
0000007_13.tif	CX7389	Control	17.122	13.756	4.74999	4.42391	-0.326087	0	0.295	1.30505	-0.0961958	3
0000007_13.tif	CX7389	Control	12.683	13.824	4.74999	2.47856	-2.27144	0	0.295	0.731174	-0.670074	3
0000007_13.tif	CX7389	Control	17.252	13.878	4.74999	4.5987	-0.151298	0	0.295	1.35662	-0.0446329	3
0000007_13.tif	CX7389	Control	13.753	14.139	4.74999	2.73031	-2.01968	0	0.295	0.805442	-0.595806	3
0000007_13.tif	CX7389	Control	10.404	14.365	4.74999	4.1557	-0.594295	0	0.295	1.22593	-0.175317	3
0000007_13.tif	CX7389	Control	14.814	14.423	4.74999	3.32292	-1.42707	0	0.295	0.980263	-0.420986	3
0000007_13.tif	CX7389	Control	16.557	14.45	4.74999	4.39674	-0.35325	0	0.295	1.29704	-0.104209	3
0000007_13.tif	CX7389	Control	11.455	14.715	4.74999	3.78747	-0.962524	0	0.295	1.1173	-0.283944	3
0000007_13.tif	CX7389	Control	11.352	14.76	4.74999	3.87862	-0.871374	0	0.295	1.14419	-0.257055	3
0000007_13.tif	CX7389	Control	16.173	14.818	4.74999	4.40127	-0.348726	0	0.295	1.29837	-0.102874	3
0000007_13.tif	CX7389	Control	12.486	14.948	4.74999	3.61573	-1.13426	0	0.295	1.06664	-0.334607	3
0000007_13.tif	CX7389	Control	16.308	15.03	4.74999	4.65065	-0.0993401	0	0.295	1.37194	-0.0293053	3
0000007_13.tif	CX7389	Control	12.429	15.035	4.74999	3.71403	-1.03596	0	0.295	1.09564	-0.305609	3
0000007_13.tif	CX7389	Control	24.119	18.586	4.74999	12.922	8.17205	1	0.295	3.812	2.41075	3
00000002_7.tif	CX7389	Control	12.685	7.219	5.30218	5.0282	-0.273981	0	0.295	1.48332	-0.0808243	3
00000002_7.tif	CX7389	Control	15.223	7.613	5.30218	3.949	-1.35318	0	0.295	1.16496	-0.399188	3
00000002_7.tif	CX7389	Control	15.795	7.946	5.30218	3.66159	-1.64059	0	0.295	1.08017	-0.483975	3
00000002_7.tif	CX7389	Control	13.762	8.006	5.30218	3.84291	-1.45927	0	0.295	1.13366	-0.430484	3
00000002_7.tif	CX7389	Control	17.108	8.024	5.30218	4.01071	-1.29148	0	0.295	1.18316	-0.380985	3
00000002_7.tif	CX7389	Control	18.282	8.279	5.30218	4.49	-0.812186	0	0.295	1.32455	-0.239595	3
00000002_7.tif	CX7389	Control	18.013	8.295	5.30218	4.29881	-1.00338	0	0.295	1.26815	-0.295996	3
00000002_7.tif	CX7389	Control	14.288	8.471	5.30218	3.22816	-2.07402	0	0.295	0.952308	-0.611835	3
00000002_7.tif	CX7389	Control	11.558	8.623	5.30218	4.69475	-0.607435	0	0.295	1.38495	-0.179193	3
00000002_7.tif	CX7389	Control	17.987	8.744	5.30218	3.95006	-1.35212	0	0.295	1.16527	-0.398877	3
00000002_7.tif	CX7389	Control	17.78	9.775	5.30218	3.12283	-2.17935	0	0.295	0.921236	-0.642908	3
00000002_7.tif	CX7389	Control	12.41	9.905	5.30218	3.26131	-2.04087	0	0.295	0.962086	-0.602058	3
00000002_7.tif	CX7389	Control	11.819	10.049	5.30218	3.72145	-1.58073	0	0.295	1.09783	-0.466317	3
00000002_7.tif	CX7389	Control	18.539	10.077	5.30218	3.63698	-1.6652	0	0.295	1.07291	-0.491234	3
00000002_7.tif	CX7389	Control	11.218	10.745	5.30218	4.08356	-1.21862	0	0.295	1.20465	-0.359492	3
00000002_7.tif	CX7389	Control	8.154	11.299	5.30218	7.06989	1.76771	1	0.295	2.08562	0.521475	3
00000002_7.tif	CX7389	Control	9.73	11.324	5.30218	5.49416	0.191976	1	0.295	1.62078	0.0566329	3
00000002_7.tif	CX7389	Control	18.697	11.473	5.30218	3.47914	-1.82304	0	0.295	1.02635	-0.537798	3
00000002_7.tif	CX7389	Control	12.688	11.618	5.30218	2.53162	-2.77056	0	0.295	0.746828	-0.817316	3
00000002_7.tif	CX7389	Control	11.008	11.751	5.30218	4.21524	-1.08694	0	0.295	1.2435	-0.320648	3
00000002_7.tif	CX7389	Control	12.513	11.832	5.30218	2.71944	-2.58274	0	0.295	0.802234	-0.76191	3
00000002_7.tif	CX7389	Control	13.479	12.483	5.30218	1.96872	-3.33347	0	0.295	0.580771	-0.983372	3
00000002_7.tif	CX7389	Control	12.546	12.626	5.30218	2.87698	-2.4252	0	0.295	0.84871	-0.715434	3
00000002_7.tif	CX7389	Control	13.452	12.856	5.30218	2.19014	-3.11204	0	0.295	0.646092	-0.918051	3
00000002_7.tif	CX7389	Control	16.204	12.876	5.30218	1.6422	-3.65998	0	0.295	0.484449	-1.07969	3
00000002_7.tif	CX7389	Control	18.272	13.027	5.30218	3.3863	-1.91588	0	0.295	0.998959	-0.565185	3
00000002_7.tif	CX7389	Control	17.748	13.163	5.30218	2.99317	-2.30902	0	0.295	0.882984	-0.68116	3
00000002_7.tif	CX7389	Control	12.955	13.178	5.30218	2.78157	-2.52061	0	0.295	0.820564	-0.743579	3
00000002_7.tif	CX7389	Control	18.834	13.578	5.30218	4.13914	-1.16304	0	0.295	1.22105	-0.343097	3
00000002_7.tif	CX7389	Control	15.231	13.619	5.30218	2.05704	-3.24515	0	0.295	0.606825	-0.957318	3
00000002_7.tif	CX7389	Control	18.445	13.768	5.30218	3.90813	-1.39405	0	0.295	1.1529	-0.411244	3
00000002_7.tif	CX7389	Control	13.975	13.807	5.30218	2.56662	-2.73556	0	0.295	0.757154	-0.806989	3
00000002_7.tif	CX7389	Control	14.401	13.887	5.30218	2.4647	-2.83748	0	0.295	0.727087	-0.837057	3
00000002_7.tif	CX7389	Control	13.656	13.913	5.30218	2.82315	-2.47903	0	0.295	0.832829	-0.731315	3
00000002_7.tif	CX7389	Control	13.916	13.936	5.30218	2.70808	-2.5941	0	0.295	0.798883	-0.765261	3
00000002_7.tif	CX7389	Control	11.336	14.039	5.30218	4.60578	-0.696401	0	0.295	1.35871	-0.205438	3
00000002_7.tif	CX7389	Control	15.562	14.066	5.30218	2.52738	-2.7748	0	0.295	0.745578	-0.818566	3
00000002_7.tif	CX7389	Control	15.17	14.171	5.30218	2.60946	-2.69272	0	0.295	0.769791	-0.794353	3
00000002_7.tif	CX7389	Control	18.323	14.223	5.30218	4.08849	-1.21369	0	0.295	1.2061	-0.358039	3
00000002_7.tif	CX7389	Control	17.485	14.313	5.30218	3.56409	-1.73809	0	0.295	1.05141	-0.512736	3
00000002_7.tif	CX7389	Control	17.856	14.717	5.30218	4.11191	-1.19027	0	0.295	1.21301	-0.35113	3
00000002_7.tif	CX7389	Control	15.166	14.767	5.30218	3.20544	-2.09674	0	0.295	0.945604	-0.618539	3
00000002_7.tif	CX7389	Control	14.157	15.142	5.30218	3.7342	-1.56798	0	0.295	1.10159	-0.462555	3
00000002_7.tif	CX7389	Control	13.002	15.508	5.30218	4.52615	-0.776035	0	0.295	1.33521	-0.22893	3
00000002_7.tif	CX7389	Control	13.328	16.393	5.30218	5.18791	-0.114268	0	0.295	1.53043	-0.0337092	3
00000002_7.tif	CX7389	Control	13.342	16.556	5.30218	5.33509	0.0329066	1	0.295	1.57385	0.00970743	3
00000002_7.tif	CX7389	Control	13.462	16.721	5.30218	5.44998	0.147803	1	0.295	1.60775	0.0436018	3
00000002_7.tif	CX7389	Control	25.224	17.168	5.30218	11.4685	6.16635	1	0.295	3.38322	1.81907	3
00000002_7.tif	CX7389	Control	10.959	18.224	5.30218	7.90758	2.6054	1	0.295	2.33274	0.768593	3
00000002_7.tif	CX7389	Control	10.758	18.389	5.30218	8.15527	2.85309	1	0.295	2.40581	0.841661	3
0000016_13.tif	CX7389	Control	13.725	8.149	4.69276	3.51149	-1.18126	0	0.295	1.03589	-0.348473	3
0000016_13.tif	CX7389	Control	15.348	8.412	4.69276	2.99767	-1.69508	0	0.295	0.884314	-0.500049	3
0000016_13.tif	CX7389	Control	15.062	8.578	4.69276	2.818	-1.87476	0	0.295	0.83131	-0.553053	3
0000016_13.tif	CX7389	Control	12.719	8.58	4.69276	3.66326	-1.02949	0	0.295	1.08066	-0.3037	3
0000016_13.tif	CX7389	Control	16.171	8.579	4.69276	3.02744	-1.66532	0	0.295	0.893094	-0.491269	3
0000016_13.tif	CX7389	Control	15.73	8.637	4.69276	2.83872	-1.85404	0	0.295	0.837421	-0.546942	3
0000016_13.tif	CX7389	Control	14.57	8.752	4.69276	2.68939	-2.00337	0	0.295	0.793369	-0.590994	3
0000016_13.tif	CX7389	Control	12.65	8.845	4.69276	3.51075	-1.18201	0	0.295	1.03567	-0.348692	3
0000016_13.tif	CX7389	Control	14.944	8.856	4.69276	2.54274	-2.15002	0	0.295	0.750108	-0.634255	3
0000016_13.tif	CX7389	Control	17.51	8.906	4.69276	3.49182	-1.20094	0	0.295	1.03009	-0.354276	3
0000016_13.tif	CX7389	Control	13.781	8.99	4.69276	2.72577	-1.96699	0	0.295	0.804101	-0.580262	3
0000016_13.tif	CX7389	Control	13.818	9.556	4.69276	2.22107	-2.47169	0	0.295	0.655215	-0.729148	3
0000016_13.tif	CX7389	Control	15.498	9.621	4.69276	1.82776	-2.86499	0	0.295	0.53919	-0.845172	3
0000016_13.tif	CX7389	Control	18.154	9.745	4.69276	3.50518	-1.18758	0	0.295	1.03403	-0.350336	3
0000016_13.tif	CX7389	Control	13.948	9.768	4.69276	1.97266	-2.7201	0	0.295	0.581934	-0.802429	3
0000016_13.tif	CX7389	Control	14.844	10.113	4.69276	1.30139	-3.39137	0	0.295	0.38391	-1.00045	3
0000016_13.tif	CX7389	Control	16.311	10.294	4.69276	1.66565	-3.0271	0	0.295	0.491368	-0.892995	3
0000016_13.tif	CX7389	Control	13.049	10.437	4.69276	2.22976	-2.46299	0	0.295	0.657781	-0.726582	3
0000016_13.tif	CX7389	Control	14.884	10.522	4.69276	0.891942	-3.80081	0	0.295	0.263123	-1.12124	3
0000016_13.tif	CX7389	Control	12.929	10.534	4.69276	2.30059	-2.39216	0	0.295	0.678675	-0.705688	3
0000016_13.tif	CX7389	Control	14.137	10.733	4.69276	1.13807	-3.55469	0	0.295	0.335729	-1.04863	3
0000016_13.tif	CX7389	Control	13.434	10.78	4.69276	1.74064	-2.95211	0	0.295	0.51349	-0.870873	3
0000016_13.tif	CX7389	Control	14.59	10.844	4.69276	0.726284	-3.96647	0	0.295	0.214254	-1.17011	3
0000016_13.tif	CX7389	Control	14.452	10.934	4.69276	0.765208	-3.92755	0	0.295	0.225736	-1.15863	3
0000016_13.tif	CX7389	Control	13.547	10.949	4.69276	1.57957	-3.11319	0	0.295	0.465972	-0.91839	3
0000016_13.tif	CX7389	Control	13.31	11.097	4.69276	1.77733	-2.91542	0	0.295	0.524313	-0.86005	3
0000016_13.tif	CX7389	Control	13.894	11.318	4.69276	1.1706	-3.52215	0	0.295	0.345327	-1.03904	3
0000016_13.tif	CX7389	Control	13.691	11.547	4.69276	1.37929	-3.31346	0	0.295	0.406891	-0.977472	3
0000016_13.tif	CX7389	Control	14.034	11.606	4.69276	1.04923	-3.64352	0	0.295	0.309523	-1.07484	3
0000016_13.tif	CX7389	Control	18.272	11.633	4.69276	3.21874	-1.47402	0	0.295	0.949527	-0.434835	3
0000016_13.tif	CX7389	Control	18.743	11.695	4.69276	3.69312	-0.999632	0	0.295	1.08947	-0.294891	3
0000016_13.tif	CX7389	Control	11.92	11.838	4.69276	3.17294	-1.51982	0	0.295	0.936016	-0.448346	3
0000016_13.tif	CX7389	Control	13.791	11.892	4.69276	1.36435	-3.3284	0	0.295	0.402484	-0.981879	3
0000016_13.tif	CX7389	Control	16.567	11.905	4.69276	1.58874	-3.10401	0	0.295	0.468679	-0.915683	3
0000016_13.tif	CX7389	Control	16.662	11.93	4.69276	1.68676	-3.006	0	0.295	0.497594	-0.886769	3
0000016_13.tif	CX7389	Control	12.074	12.113	4.69276	3.07282	-1.61993	0	0.295	0.906482	-0.47788	3
0000016_13.tif	CX7389	Control	13.78	12.217	4.69276	1.52236	-3.1704	0	0.295	0.449095	-0.935268	3
0000016_13.tif	CX7389	Control	12.92	12.676	4.69276	2.49531	-2.19745	0	0.295	0.736116	-0.648247	3
0000016_13.tif	CX7389	Control	14.26	12.915	4.69276	1.71772	-2.97503	0	0.295	0.506728	-0.877635	3
0000016_13.tif	CX7389	Control	17.78	12.983	4.69276	3.14739	-1.54536	0	0.295	0.928481	-0.455881	3
0000016_13.tif	CX7389	Control	12.135	13.185	4.69276	3.43043	-1.26233	0	0.295	1.01198	-0.372386	3
0000016_13.tif	CX7389	Control	15.312	13.658	4.69276	2.27577	-2.41698	0	0.295	0.671353	-0.71301	3
0000016_13.tif	CX7389	Control	15.438	13.777	4.69276	2.41051	-2.28225	0	0.295	0.711099	-0.673264	3
0000016_13.tif	CX7389	Control	13.939	13.979	4.69276	2.81656	-1.87619	0	0.295	0.830886	-0.553477	3
0000016_13.tif	CX7389	Control	14.673	14.865	4.69276	3.49074	-1.20201	0	0.295	1.02977	-0.354594	3
0000029_13.tif	CX7389	Control	12.365	7.139	5.27621	4.18447	-1.09174	0	0.295	1.23442	-0.322063	3
0000029_13.tif	CX7389	Control	16.6	7.388	5.27621	4.42812	-0.848091	0	0.295	1.3063	-0.250187	3
0000029_13.tif	CX7389	Control	11.307	7.553	5.27621	4.37155	-0.904664	0	0.295	1.28961	-0.266876	3
0000029_13.tif	CX7389	Control	11.398	7.67	5.27621	4.22333	-1.05288	0	0.295	1.24588	-0.3106	3
0000029_13.tif	CX7389	Control	9.812	8.408	5.27621	4.93046	-0.345758	0	0.295	1.45448	-0.101999	3
0000029_13.tif	CX7389	Control	10.725	8.439	5.27621	4.16025	-1.11596	0	0.295	1.22727	-0.329208	3
0000029_13.tif	CX7389	Control	16.645	8.555	5.27621	3.57934	-1.69687	0	0.295	1.05591	-0.500577	3
0000029_13.tif	CX7389	Control	13.618	8.963	5.27621	2.05982	-3.2164	0	0.295	0.607646	-0.948837	3
0000029_13.tif	CX7389	Control	13.214	8.96	5.27621	2.1771	-3.09911	0	0.295	0.642246	-0.914237	3
0000029_13.tif	CX7389	Control	11.971	9.08	5.27621	2.79414	-2.48207	0	0.295	0.824272	-0.73221	3
0000029_13.tif	CX7389	Control	12.819	9.317	5.27621	2.05224	-3.22397	0	0.295	0.605411	-0.951072	3
0000029_13.tif	CX7389	Control	13.913	9.428	5.27621	1.55941	-3.71681	0	0.295	0.460025	-1.09646	3
0000029_13.tif	CX7389	Control	13.745	9.509	5.27621	1.49969	-3.77652	0	0.295	0.442408	-1.11407	3
0000029_13.tif	CX7389	Control	16.786	9.54	5.27621	3.12379	-2.15243	0	0.295	0.921517	-0.634966	3
0000029_13.tif	CX7389	Control	14.047	9.562	5.27621	1.42234	-3.85388	0	0.295	0.41959	-1.13689	3
0000029_13.tif	CX7389	Control	13.616	9.592	5.27621	1.44833	-3.82788	0	0.295	0.427258	-1.12923	3
0000029_13.tif	CX7389	Control	14.271	9.609	5.27621	1.39845	-3.87777	0	0.295	0.412541	-1.14394	3
0000029_13.tif	CX7389	Control	13.54	9.744	5.27621	1.32822	-3.94799	0	0.295	0.391826	-1.16466	3
0000029_13.tif	CX7389	Control	11.989	9.994	5.27621	2.25584	-3.02037	0	0.295	0.665474	-0.891009	3
0000029_13.tif	CX7389	Control	13.381	10.028	5.27621	1.14768	-4.12854	0	0.295	0.338565	-1.21792	3
0000029_13.tif	CX7389	Control	12.291	10.253	5.27621	1.8735	-3.40272	0	0.295	0.552681	-1.0038	3
0000029_13.tif	CX7389	Control	16.608	10.444	5.27621	2.64765	-2.62856	0	0.295	0.781058	-0.775425	3
0000029_13.tif	CX7389	Control	11.949	10.816	5.27621	2.07382	-3.2024	0	0.295	0.611776	-0.944707	3
0000029_13.tif	CX7389	Control	14.791	10.969	5.27621	0.775145	-4.50107	0	0.295	0.228668	-1.32782	3
0000029_13.tif	CX7389	Control	11.107	11.036	5.27621	2.90946	-2.36675	0	0.295	0.858292	-0.698191	3
0000029_13.tif	CX7389	Control	14.76	11.062	5.27621	0.748078	-4.52814	0	0.295	0.220683	-1.3358	3
0000029_13.tif	CX7389	Control	13.566	11.19	5.27621	0.49491	-4.7813	0	0.295	0.145998	-1.41048	3
0000029_13.tif	CX7389	Control	14.122	11.353	5.27621	0.383923	-4.89229	0	0.295	0.113257	-1.44323	3
0000029_13.tif	CX7389	Control	16.065	11.436	5.27621	2.09826	-3.17795	0	0.295	0.618987	-0.937496	3
0000029_13.tif	CX7389	Control	12.644	11.504	5.27621	1.46724	-3.80898	0	0.295	0.432835	-1.12365	3
0000029_13.tif	CX7389	Control	13.994	11.536	5.27621	0.552438	-4.72378	0	0.295	0.162969	-1.39351	3
0000029_13.tif	CX7389	Control	18.26	11.563	5.27621	4.28331	-0.9929	0	0.295	1.26358	-0.292905	3
0000029_13.tif	CX7389	Control	10.857	11.602	5.27621	3.21888	-2.05733	0	0.295	0.94957	-0.606913	3
0000029_13.tif	CX7389	Control	14.875	11.622	5.27621	1.07001	-4.2062	0	0.295	0.315653	-1.24083	3
0000029_13.tif	CX7389	Control	13.549	11.653	5.27621	0.815874	-4.46034	0	0.295	0.240683	-1.3158	3
0000029_13.tif	CX7389	Control	15.649	11.647	5.27621	1.76246	-3.51376	0	0.295	0.519925	-1.03656	3
0000029_13.tif	CX7389	Control	18.115	11.652	5.27621	4.15307	-1.12314	0	0.295	1.22516	-0.331326	3
0000029_13.tif	CX7389	Control	11.905	11.785	5.27621	2.25786	-3.01836	0	0.295	0.666068	-0.890415	3
0000029_13.tif	CX7389	Control	12.658	11.797	5.27621	1.58276	-3.69345	0	0.295	0.466915	-1.08957	3
0000029_13.tif	CX7389	Control	17.661	11.922	5.27621	3.76376	-1.51246	0	0.295	1.11031	-0.446175	3
0000029_13.tif	CX7389	Control	18.342	12.116	5.27621	4.47166	-0.804558	0	0.295	1.31914	-0.237345	3
0000029_13.tif	CX7389	Control	13.662	12.229	5.27621	1.29435	-3.98186	0	0.295	0.381833	-1.17465	3
0000029_13.tif	CX7389	Control	15.396	12.275	5.27621	1.88973	-3.38648	0	0.295	0.55747	-0.999012	3
0000029_13.tif	CX7389	Control	11.327	12.314	5.27621	2.99994	-2.27628	0	0.295	0.884981	-0.671502	3
0000029_13.tif	CX7389	Control	15.323	12.411	5.27621	1.93509	-3.34112	0	0.295	0.570852	-0.985631	3
0000029_13.tif	CX7389	Control	9.706	12.442	5.27621	4.54993	-0.726283	0	0.295	1.34223	-0.214254	3
0000029_13.tif	CX7389	Control	14.707	12.461	5.27621	1.63065	-3.64557	0	0.295	0.481041	-1.07544	3
0000029_13.tif	CX7389	Control	13.066	12.482	5.27621	1.77384	-3.50237	0	0.295	0.523282	-1.0332	3
0000029_13.tif	CX7389	Control	15.638	12.516	5.27621	2.23112	-3.04509	0	0.295	0.658181	-0.898302	3
0000029_13.tif	CX7389	Control	18.412	12.623	5.27621	4.6916	-0.584611	0	0.295	1.38402	-0.17246	3
0000029_13.tif	CX7389	Control	14.71	12.632	5.27621	1.78817	-3.48805	0	0.295	0.527509	-1.02897	3
0000029_13.tif	CX7389	Control	10.548	12.737	5.27621	3.88588	-1.39034	0	0.295	1.14633	-0.41015	3
0000029_13.tif	CX7389	Control	12.158	12.736	5.27621	2.55376	-2.72246	0	0.295	0.753358	-0.803125	3
0000029_13.tif	CX7389	Control	11.645	12.828	5.27621	3.00366	-2.27255	0	0.295	0.88608	-0.670403	3
0000029_13.tif	CX7389	Control	10.511	12.832	5.27621	3.96234	-1.31387	0	0.295	1.16889	-0.387593	3
0000029_13.tif	CX7389	Control	12.282	13.004	5.27621	2.66217	-2.61404	0	0.295	0.785341	-0.771142	3
0000029_13.tif	CX7389	Control	12.245	13.103	5.27621	2.76163	-2.51458	0	0.295	0.814681	-0.741802	3
0000029_13.tif	CX7389	Control	13.73	13.293	5.27621	2.32665	-2.94957	0	0.295	0.68636	-0.870123	3
0000029_13.tif	CX7389	Control	12.172	13.405	5.27621	3.04328	-2.23293	0	0.295	0.897769	-0.658714	3
0000029_13.tif	CX7389	Control	13.906	13.452	5.27621	2.47045	-2.80576	0	0.295	0.728783	-0.8277	3
0000029_13.tif	CX7389	Control	11.01	13.651	5.27621	4.01857	-1.25764	0	0.295	1.18548	-0.371004	3
0000029_13.tif	CX7389	Control	12.255	13.998	5.27621	3.49075	-1.78547	0	0.295	1.02977	-0.526712	3
0000029_13.tif	CX7389	Control	10.786	14.123	5.27621	4.50402	-0.772191	0	0.295	1.32869	-0.227796	3
0000029_13.tif	CX7389	Control	14.331	14.346	5.27621	3.37672	-1.89949	0	0.295	0.996134	-0.560349	3
0000029_13.tif	CX7389	Control	15.749	14.445	5.27621	3.87063	-1.40558	0	0.295	1.14184	-0.414646	3
0000029_13.tif	CX7389	Control	14.658	14.568	5.27621	3.64105	-1.63517	0	0.295	1.07411	-0.482374	3
0000029_13.tif	CX7389	Control	13.19	14.776	5.27621	3.88092	-1.39529	0	0.295	1.14487	-0.411612	3
0000029_13.tif	CX7389	Control	12.589	14.942	5.27621	4.20739	-1.06883	0	0.295	1.24118	-0.315304	3
0000029_13.tif	CX7389	Control	14.586	14.958	5.27621	4.01467	-1.26154	0	0.295	1.18433	-0.372155	3
0000029_13.tif	CX7389	Control	12.809	15.05	5.27621	4.24137	-1.03485	0	0.295	1.2512	-0.305279	3
0000029_13.tif	CX7389	Control	11.495	15.283	5.27621	4.98366	-0.292556	0	0.295	1.47018	-0.086304	3
0000029_13.tif	CX7389	Control	13.121	15.511	5.27621	4.61462	-0.661589	0	0.295	1.36131	-0.195169	3
0000029_13.tif	CX7389	Control	14.155	15.631	5.27621	4.64908	-0.627135	0	0.295	1.37148	-0.185005	3
0000029_13.tif	CX7389	Control	13.001	15.64	5.27621	4.76535	-0.510863	0	0.295	1.40578	-0.150705	3
0000035_13.tif	CX7389	Control	17.557	7.51	5.0887	4.69697	-0.391721	0	0.295	1.38561	-0.115558	3
0000035_13.tif	CX7389	Control	18.152	7.566	5.0887	4.95411	-0.134585	0	0.295	1.46146	-0.0397025	3
0000035_13.tif	CX7389	Control	16.013	7.633	5.0887	4.0883	-1.00039	0	0.295	1.20605	-0.295116	3
0000035_13.tif	CX7389	Control	17.358	7.651	5.0887	4.48117	-0.607522	0	0.295	1.32195	-0.179219	3
0000035_13.tif	CX7389	Control	13.586	8.133	5.0887	3.96774	-1.12096	0	0.295	1.17048	-0.330682	3
0000035_13.tif	CX7389	Control	14.175	8.155	5.0887	3.7177	-1.37099	0	0.295	1.09672	-0.404443	3
0000035_13.tif	CX7389	Control	15.454	8.233	5.0887	3.4398	-1.6489	0	0.295	1.01474	-0.486425	3
0000035_13.tif	CX7389	Control	15.383	8.327	5.0887	3.345	-1.74369	0	0.295	0.986775	-0.51439	3
0000035_13.tif	CX7389	Control	16.16	8.324	5.0887	3.43766	-1.65104	0	0.295	1.01411	-0.487056	3
0000035_13.tif	CX7389	Control	13.411	8.552	5.0887	3.68936	-1.39934	0	0.295	1.08836	-0.412805	3
0000035_13.tif	CX7389	Control	17.253	8.826	5.0887	3.40703	-1.68167	0	0.295	1.00507	-0.496092	3
0000035_13.tif	CX7389	Control	17.123	8.846	5.0887	3.32029	-1.76841	0	0.295	0.979486	-0.52168	3
0000035_13.tif	CX7389	Control	17.334	9.108	5.0887	3.2237	-1.865	0	0.295	0.95099	-0.550175	3
0000035_13.tif	CX7389	Control	17.853	9.27	5.0887	3.44751	-1.64118	0	0.295	1.01702	-0.48415	3
0000035_13.tif	CX7389	Control	18.635	10.134	5.0887	3.60007	-1.48863	0	0.295	1.06202	-0.439146	3
0000035_13.tif	CX7389	Control	14.586	10.236	5.0887	1.64089	-3.4478	0	0.295	0.484064	-1.0171	3
0000035_13.tif	CX7389	Control	13.597	10.661	5.0887	2.04969	-3.03901	0	0.295	0.604657	-0.896508	3
0000035_13.tif	CX7389	Control	14.001	10.714	5.0887	1.67911	-3.40959	0	0.295	0.495337	-1.00583	3
0000035_13.tif	CX7389	Control	14.151	10.881	5.0887	1.46155	-3.62715	0	0.295	0.431157	-1.07001	3
0000035_13.tif	CX7389	Control	12.502	11.205	5.0887	2.91564	-2.17305	0	0.295	0.860115	-0.641051	3
0000035_13.tif	CX7389	Control	14.097	11.331	5.0887	1.32754	-3.76115	0	0.295	0.391625	-1.10954	3
0000035_13.tif	CX7389	Control	12.775	11.363	5.0887	2.62326	-2.46543	0	0.295	0.773862	-0.727303	3
0000035_13.tif	CX7389	Control	19.243	11.691	5.0887	3.86305	-1.22565	0	0.295	1.1396	-0.361567	3
0000035_13.tif	CX7389	Control	16.904	11.759	5.0887	1.52648	-3.56221	0	0.295	0.450312	-1.05085	3
0000035_13.tif	CX7389	Control	16.658	11.878	5.0887	1.2945	-3.7942	0	0.295	0.381876	-1.11929	3
0000035_13.tif	CX7389	Control	17.164	12.206	5.0887	1.86221	-3.22649	0	0.295	0.549351	-0.951815	3
0000035_13.tif	CX7389	Control	23.497	12.321	5.0887	8.1429	3.05421	1	0.295	2.40216	0.900991	3
0000035_13.tif	CX7389	Control	19.389	12.428	5.0887	4.07966	-1.00904	0	0.295	1.2035	-0.297666	3
0000035_13.tif	CX7389	Control	14.266	12.615	5.0887	1.45954	-3.62916	0	0.295	0.430563	-1.0706	3
0000035_13.tif	CX7389	Control	19.457	13.093	5.0887	4.31754	-0.771154	0	0.295	1.27367	-0.22749	3
0000035_13.tif	CX7389	Control	18.889	13.609	5.0887	4.00812	-1.08057	0	0.295	1.1824	-0.318769	3
0000035_13.tif	CX7389	Control	18.733	13.652	5.0887	3.89397	-1.19473	0	0.295	1.14872	-0.352444	3
0000035_13.tif	CX7389	Control	11.177	13.764	5.0887	4.69486	-0.39384	0	0.295	1.38498	-0.116183	3
0000035_13.tif	CX7389	Control	11.279	13.895	5.0887	4.66475	-0.423942	0	0.295	1.3761	-0.125063	3
0000035_13.tif	CX7389	Control	11.396	14.02	5.0887	4.62443	-0.464265	0	0.295	1.36421	-0.136958	3
0000035_13.tif	CX7389	Control	14.651	14.045	5.0887	2.48245	-2.60624	0	0.295	0.732323	-0.768842	3
0000035_13.tif	CX7389	Control	11.743	14.119	5.0887	4.38356	-0.705138	0	0.295	1.29315	-0.208016	3
0000035_13.tif	CX7389	Control	18.107	14.137	5.0887	3.67597	-1.41273	0	0.295	1.08441	-0.416754	3
0000035_13.tif	CX7389	Control	13.046	14.852	5.0887	3.94461	-1.14409	0	0.295	1.16366	-0.337505	3
0000035_13.tif	CX7389	Control	16.264	15.472	5.0887	3.90147	-1.18723	0	0.295	1.15093	-0.350232	3
0000035_13.tif	CX7389	Control	15.372	15.767	5.0887	4.09501	-0.993688	0	0.295	1.20803	-0.293138	3
0000035_13.tif	CX7389	Control	17.875	15.844	5.0887	4.86113	-0.227564	0	0.295	1.43403	-0.0671313	3
0000035_13.tif	CX7389	Control	13.081	16.19	5.0887	5.06929	-0.0194037	0	0.295	1.49544	-0.00572409	3
0000035_13.tif	CX7389	Control	15.547	16.507	5.0887	4.83788	-0.250813	0	0.295	1.42718	-0.0739898	3
0000035_13.tif	CX7389	Control	15.089	16.646	5.0887	4.98251	-0.106191	0	0.295	1.46984	-0.0313263	3
0000035_13.tif	CX7389	Control	12.717	19.369	5.0887	8.14465	3.05596	1	0.295	2.40267	0.901507	3
0000035_13.tif	CX7389	Control	12.542	19.547	5.0887	8.37077	3.28208	1	0.295	2.46938	0.968213	3
0000029_11.tif	CX7389	Control	17.593	2.168	4.24509	9.99618	5.75109	1	0.295	2.94887	1.69657	3
0000029_11.tif	CX7389	Control	14.603	5.221	4.24509	6.4519	2.20681	1	0.295	1.90331	0.65101	3
0000029_11.tif	CX7389	Control	14.467	6.654	4.24509	5.01808	0.772987	1	0.295	1.48033	0.228031	3
0000029_11.tif	CX7389	Control	15.017	6.961	4.24509	4.73983	0.494741	1	0.295	1.39825	0.145949	3
0000029_11.tif	CX7389	Control	18.245	6.986	4.24509	6.00176	1.75667	1	0.295	1.77052	0.518217	3
0000029_11.tif	CX7389	Control	10.835	8.346	4.24509	4.94549	0.7004	1	0.295	1.45892	0.206618	3
0000029_11.tif	CX7389	Control	14.439	8.858	4.24509	2.81456	-1.43053	0	0.295	0.830294	-0.422007	3
0000029_11.tif	CX7389	Control	11.434	9.137	4.24509	3.97441	-0.270679	0	0.295	1.17245	-0.0798504	3
0000029_11.tif	CX7389	Control	17.532	9.21	4.24509	3.90958	-0.335511	0	0.295	1.15333	-0.0989758	3
0000029_11.tif	CX7389	Control	12.039	9.265	4.24509	3.43883	-0.806256	0	0.295	1.01446	-0.237846	3
0000029_11.tif	CX7389	Control	13.847	9.299	4.24509	2.45988	-1.78521	0	0.295	0.725666	-0.526636	3
0000029_11.tif	CX7389	Control	17.51	10.722	4.24509	3.16113	-1.08396	0	0.295	0.932533	-0.319769	3
0000029_11.tif	CX7389	Control	11.544	10.811	4.24509	3.07404	-1.17105	0	0.295	0.906842	-0.34546	3
0000029_11.tif	CX7389	Control	17.506	10.895	4.24509	3.10964	-1.13545	0	0.295	0.917343	-0.334959	3
0000029_11.tif	CX7389	Control	17.386	10.912	4.24509	2.98923	-1.25586	0	0.295	0.881822	-0.37048	3
0000029_11.tif	CX7389	Control	16.344	10.946	4.24509	1.98642	-2.25867	0	0.295	0.585995	-0.666307	3
0000029_11.tif	CX7389	Control	16.372	11.108	4.24509	1.9599	-2.28519	0	0.295	0.578172	-0.67413	3
0000029_11.tif	CX7389	Control	17.488	11.126	4.24509	3.04239	-1.2027	0	0.295	0.897506	-0.354795	3
0000029_11.tif	CX7389	Control	17.558	11.189	4.24509	3.10085	-1.14424	0	0.295	0.91475	-0.337552	3
0000029_11.tif	CX7389	Control	17.322	11.424	4.24509	2.83786	-1.40723	0	0.295	0.837168	-0.415134	3
0000029_11.tif	CX7389	Control	9.498	11.457	4.24509	5.00162	0.756532	1	0.295	1.47548	0.223177	3
0000029_11.tif	CX7389	Control	16.817	11.495	4.24509	2.32874	-1.91635	0	0.295	0.686977	-0.565325	3
0000029_11.tif	CX7389	Control	13.093	11.596	4.24509	1.40406	-2.84103	0	0.295	0.414197	-0.838105	3
0000029_11.tif	CX7389	Control	14.359	11.92	4.24509	0.282843	-3.96225	0	0.295	0.0834386	-1.16886	3
0000029_11.tif	CX7389	Control	17.507	11.92	4.24509	3.02219	-1.2229	0	0.295	0.891547	-0.360755	3
0000029_11.tif	CX7389	Control	11.813	11.962	4.24509	2.69763	-1.54746	0	0.295	0.795802	-0.4565	3
0000029_11.tif	CX7389	Control	18.042	11.965	4.24509	3.55908	-0.68601	0	0.295	1.04993	-0.202373	3
0000029_11.tif	CX7389	Control	11.944	12.054	4.24509	2.57944	-1.66565	0	0.295	0.760936	-0.491366	3
0000029_11.tif	CX7389	Control	13.714	12.27	4.24509	0.983649	-3.26144	0	0.295	0.290176	-0.962125	3
0000029_11.tif	CX7389	Control	12.741	12.335	4.24509	1.87512	-2.36997	0	0.295	0.553161	-0.699141	3
0000029_11.tif	CX7389	Control	17.902	12.587	4.24509	3.52773	-0.717362	0	0.295	1.04068	-0.211622	3
0000029_11.tif	CX7389	Control	18.215	12.763	4.24509	3.87668	-0.368407	0	0.295	1.14362	-0.10868	3
0000029_11.tif	CX7389	Control	15.982	12.765	4.24509	1.84549	-2.3996	0	0.295	0.544418	-0.707883	3
0000029_11.tif	CX7389	Control	15.855	12.88	4.24509	1.81903	-2.42606	0	0.295	0.536613	-0.715688	3
0000029_11.tif	CX7389	Control	15.302	12.908	4.24509	1.47612	-2.76897	0	0.295	0.435457	-0.816845	3
0000029_11.tif	CX7389	Control	14.872	13.085	4.24509	1.46243	-2.78266	0	0.295	0.431416	-0.820885	3
0000029_11.tif	CX7389	Control	14.464	13.38	4.24509	1.70828	-2.53681	0	0.295	0.503943	-0.748359	3
0000029_11.tif	CX7389	Control	13.212	13.474	4.24509	2.21208	-2.03301	0	0.295	0.652563	-0.599739	3
0000029_11.tif	CX7389	Control	14.603	13.491	4.24509	1.8222	-2.42289	0	0.295	0.53755	-0.714752	3
0000029_11.tif	CX7389	Control	12.825	13.848	4.24509	2.74297	-1.50212	0	0.295	0.809176	-0.443126	3
0000029_11.tif	CX7389	Control	16.322	13.94	4.24509	2.91234	-1.33275	0	0.295	0.859142	-0.39316	3
0000029_11.tif	CX7389	Control	13.143	14.005	4.24509	2.69644	-1.54865	0	0.295	0.79545	-0.456852	3
0000029_11.tif	CX7389	Control	12.89	14.101	4.24509	2.91137	-1.33372	0	0.295	0.858854	-0.393448	3
0000029_11.tif	CX7389	Control	14.583	14.1	4.24509	2.42959	-1.8155	0	0.295	0.71673	-0.535571	3
0000029_11.tif	CX7389	Control	13.209	14.318	4.24509	2.94196	-1.30313	0	0.295	0.867877	-0.384424	3
0000029_11.tif	CX7389	Control	11.327	14.396	4.24509	4.17809	-0.0670051	0	0.295	1.23254	-0.0197665	3
0000029_11.tif	CX7389	Control	15.773	14.517	4.24509	3.11886	-1.12623	0	0.295	0.920065	-0.332237	3
0000029_11.tif	CX7389	Control	10.778	14.532	4.24509	4.68996	0.444865	1	0.295	1.38354	0.131235	3
0000029_11.tif	CX7389	Control	14.388	14.741	4.24509	3.07086	-1.17423	0	0.295	0.905905	-0.346397	3
0000029_11.tif	CX7389	Control	14.141	14.776	4.24509	3.12412	-1.12097	0	0.295	0.921616	-0.330686	3
0000029_11.tif	CX7389	Control	14.252	14.82	4.24509	3.15736	-1.08773	0	0.295	0.931423	-0.320879	3
0000029_11.tif	CX7389	Control	12.808	14.892	4.24509	3.63516	-0.609933	0	0.295	1.07237	-0.17993	3
0000029_11.tif	CX7389	Control	14.164	14.897	4.24509	3.24194	-1.00315	0	0.295	0.956373	-0.295929	3
0000029_11.tif	CX7389	Control	13.849	15.774	4.24509	4.15256	-0.092535	0	0.295	1.225	-0.0272978	3
0000029_11.tif	CX7389	Control	13.589	15.964	4.24509	4.38658	0.141491	1	0.295	1.29404	0.0417398	3
0000020_11.tif	CX7389	Control	11.847	7.01	4.82839	4.49962	-0.328773	0	0.295	1.32739	-0.0969881	3
0000020_11.tif	CX7389	Control	11.118	7.391	4.82839	4.52833	-0.300061	0	0.295	1.33586	-0.088518	3
0000020_11.tif	CX7389	Control	13.196	7.74	4.82839	3.40694	-1.42145	0	0.295	1.00505	-0.419329	3
0000020_11.tif	CX7389	Control	15.801	7.878	4.82839	3.8524	-0.975991	0	0.295	1.13646	-0.287917	3
0000020_11.tif	CX7389	Control	14.652	7.937	4.82839	3.31092	-1.51747	0	0.295	0.976721	-0.447653	3
0000020_11.tif	CX7389	Control	15.071	7.991	4.82839	3.4049	-1.42349	0	0.295	1.00445	-0.419929	3
0000020_11.tif	CX7389	Control	11.921	8.21	4.82839	3.4029	-1.42549	0	0.295	1.00386	-0.420519	3
0000020_11.tif	CX7389	Control	12.191	8.4	4.82839	3.10239	-1.726	0	0.295	0.915205	-0.509169	3
0000020_11.tif	CX7389	Control	16.471	8.483	4.82839	3.81546	-1.01293	0	0.295	1.12556	-0.298815	3
0000020_11.tif	CX7389	Control	15.149	8.588	4.82839	2.90626	-1.92213	0	0.295	0.857347	-0.567027	3
0000020_11.tif	CX7389	Control	12.198	8.814	4.82839	2.74446	-2.08393	0	0.295	0.809615	-0.614759	3
0000020_11.tif	CX7389	Control	10.334	9.045	4.82839	3.95098	-0.877407	0	0.295	1.16554	-0.258835	3
0000020_11.tif	CX7389	Control	16.276	9.068	4.82839	3.28421	-1.54418	0	0.295	0.968841	-0.455534	3
0000020_11.tif	CX7389	Control	10.235	9.121	4.82839	3.9974	-0.830993	0	0.295	1.17923	-0.245143	3
0000020_11.tif	CX7389	Control	11.031	9.235	4.82839	3.26366	-1.56473	0	0.295	0.962779	-0.461596	3
0000020_11.tif	CX7389	Control	17.352	9.781	4.82839	3.88314	-0.945247	0	0.295	1.14553	-0.278848	3
0000020_11.tif	CX7389	Control	13.429	9.81	4.82839	1.32758	-3.50081	0	0.295	0.391637	-1.03274	3
0000020_11.tif	CX7389	Control	15.001	9.905	4.82839	1.77043	-3.05796	0	0.295	0.522277	-0.902098	3
0000020_11.tif	CX7389	Control	15.28	10.134	4.82839	1.85406	-2.97432	0	0.295	0.546949	-0.877426	3
0000020_11.tif	CX7389	Control	15.141	10.205	4.82839	1.69855	-3.12984	0	0.295	0.501071	-0.923303	3
0000020_11.tif	CX7389	Control	12.296	10.35	4.82839	1.59867	-3.22972	0	0.295	0.471606	-0.952768	3
0000020_11.tif	CX7389	Control	10.29	10.411	4.82839	3.48364	-1.34474	0	0.295	1.02767	-0.3967	3
0000020_11.tif	CX7389	Control	16.245	10.475	4.82839	2.61987	-2.20852	0	0.295	0.772862	-0.651513	3
0000020_11.tif	CX7389	Control	11.951	10.749	4.82839	1.7886	-3.03978	0	0.295	0.527638	-0.896736	3
0000020_11.tif	CX7389	Control	16.11	11.795	4.82839	2.50285	-2.32554	0	0.295	0.73834	-0.686035	3
0000020_11.tif	CX7389	Control	17.433	12.024	4.82839	3.84059	-0.987799	0	0.295	1.13297	-0.291401	3
0000020_11.tif	CX7389	Control	16.571	12.096	4.82839	3.03308	-1.79531	0	0.295	0.89476	-0.529615	3
0000020_11.tif	CX7389	Control	15.613	13.959	4.82839	3.43083	-1.39756	0	0.295	1.0121	-0.412279	3
0000020_11.tif	CX7389	Control	16.084	13.996	4.82839	3.74218	-1.08621	0	0.295	1.10394	-0.320431	3
0000020_11.tif	CX7389	Control	8.299	14.85	4.82839	6.57254	1.74415	1	0.295	1.9389	0.514525	3
0000020_11.tif	CX7389	Control	8.127	14.902	4.82839	6.74378	1.9154	1	0.295	1.98942	0.565042	3
0000020_11.tif	CX7389	Control	14.666	14.929	4.82839	3.93951	-0.888875	0	0.295	1.16216	-0.262218	3
00000000_9.tif	CX7389	Control	12.303	4.038	4.50717	8.28745	3.78029	1	0.295	2.4448	1.11518	3
00000000_9.tif	CX7389	Control	14.154	8.086	4.50717	3.89536	-0.61181	0	0.295	1.14913	-0.180484	3
00000000_9.tif	CX7389	Control	15.521	8.648	4.50717	3.32326	-1.1839	0	0.295	0.980362	-0.349251	3
00000000_9.tif	CX7389	Control	13.009	8.977	4.50717	3.48573	-1.02144	0	0.295	1.02829	-0.301325	3
00000000_9.tif	CX7389	Control	15.658	9.908	4.50717	2.14483	-2.36233	0	0.295	0.632725	-0.696889	3
00000000_9.tif	CX7389	Control	16.205	10.221	4.50717	2.14072	-2.36644	0	0.295	0.631513	-0.6981	3
00000000_9.tif	CX7389	Control	12.101	10.799	4.50717	3.00344	-1.50373	0	0.295	0.886014	-0.443599	3
00000000_9.tif	CX7389	Control	14.421	10.825	4.50717	1.18334	-3.32382	0	0.295	0.349086	-0.980528	3
00000000_9.tif	CX7389	Control	12.63	11.108	4.50717	2.39936	-2.1078	0	0.295	0.707811	-0.621802	3
00000000_9.tif	CX7389	Control	16.106	11.148	4.50717	1.43471	-3.07245	0	0.295	0.42324	-0.906374	3
00000000_9.tif	CX7389	Control	12.594	11.402	4.50717	2.35272	-2.15445	0	0.295	0.694052	-0.635561	3
00000000_9.tif	CX7389	Control	12.739	11.526	4.50717	2.18617	-2.321	0	0.295	0.644919	-0.684694	3
00000000_9.tif	CX7389	Control	12.152	11.889	4.50717	2.73909	-1.76808	0	0.295	0.808031	-0.521583	3
00000000_9.tif	CX7389	Control	15.349	12.191	4.50717	0.536809	-3.97036	0	0.295	0.158359	-1.17126	3
00000000_9.tif	CX7389	Control	18.876	12.308	4.50717	4.00473	-0.502439	0	0.295	1.18139	-0.148219	3
00000000_9.tif	CX7389	Control	18.32	12.358	4.50717	3.45801	-1.04915	0	0.295	1.02011	-0.3095	3
00000000_9.tif	CX7389	Control	16.03	13.161	4.50717	1.6911	-2.81606	0	0.295	0.498875	-0.830739	3
00000000_9.tif	CX7389	Control	16.813	13.431	4.50717	2.4504	-2.05676	0	0.295	0.722869	-0.606744	3
00000000_9.tif	CX7389	Control	14.953	13.698	4.50717	1.78808	-2.71909	0	0.295	0.527482	-0.802132	3
00000000_9.tif	CX7389	Control	13.378	14.006	4.50717	2.58422	-1.92294	0	0.295	0.762345	-0.567269	3
00000000_9.tif	CX7389	Control	13.972	14.131	4.50717	2.4027	-2.10447	0	0.295	0.708796	-0.620818	3
00000000_9.tif	CX7389	Control	14.811	14.245	4.50717	2.33537	-2.17179	0	0.295	0.688934	-0.640679	3
00000000_9.tif	CX7389	Control	14.969	14.228	4.50717	2.31831	-2.18885	0	0.295	0.683902	-0.645711	3
00000000_9.tif	CX7389	Control	16.03	14.49	4.50717	2.81932	-1.68785	0	0.295	0.831699	-0.497914	3
00000000_9.tif	CX7389	Control	13.501	14.538	4.50717	2.97207	-1.53509	0	0.295	0.876762	-0.452852	3
00000000_9.tif	CX7389	Control	13.723	14.65	4.50717	2.97764	-1.52952	0	0.295	0.878404	-0.45121	3
00000000_9.tif	CX7389	Control	13.622	15.6	4.50717	3.90116	-0.606001	0	0.295	1.15084	-0.17877	3
0000017_11.tif	CX7389	Control	4.477	4.036	5.50228	12.23	6.72775	1	0.295	3.60786	1.98468	3
0000017_11.tif	CX7389	Control	14.18	6.605	5.50228	4.74997	-0.75231	0	0.295	1.40124	-0.221932	3
0000017_11.tif	CX7389	Control	10.433	6.723	5.50228	6.01787	0.515594	1	0.295	1.77527	0.1521	3
0000017_11.tif	CX7389	Control	15.164	7.132	5.50228	4.31437	-1.18791	0	0.295	1.27274	-0.350432	3
0000017_11.tif	CX7389	Control	16.117	7.89	5.50228	3.92283	-1.57945	0	0.295	1.15723	-0.465939	3
0000017_11.tif	CX7389	Control	11.96	8.328	5.50228	3.81058	-1.6917	0	0.295	1.12412	-0.499051	3
0000017_11.tif	CX7389	Control	11.251	8.701	5.50228	4.02356	-1.47872	0	0.295	1.18695	-0.436223	3
0000017_11.tif	CX7389	Control	11.653	8.941	5.50228	3.56408	-1.9382	0	0.295	1.0514	-0.571768	3
0000017_11.tif	CX7389	Control	14.05	9.133	5.50228	2.23247	-3.26981	0	0.295	0.658578	-0.964594	3
0000017_11.tif	CX7389	Control	14.185	9.214	5.50228	2.14193	-3.36035	0	0.295	0.631871	-0.991302	3
0000017_11.tif	CX7389	Control	11.091	9.413	5.50228	3.72984	-1.77244	0	0.295	1.1003	-0.52287	3
0000017_11.tif	CX7389	Control	14.599	9.75	5.50228	1.6362	-3.86608	0	0.295	0.482679	-1.14049	3
0000017_11.tif	CX7389	Control	10.425	9.817	5.50228	4.14639	-1.35589	0	0.295	1.22319	-0.399987	3
0000017_11.tif	CX7389	Control	10.135	9.883	5.50228	4.39451	-1.10777	0	0.295	1.29638	-0.326792	3
0000017_11.tif	CX7389	Control	10.026	9.969	5.50228	4.46998	-1.0323	0	0.295	1.31864	-0.304529	3
0000017_11.tif	CX7389	Control	14.084	9.971	5.50228	1.39626	-4.10602	0	0.295	0.411898	-1.21127	3
0000017_11.tif	CX7389	Control	10.76	10.159	5.50228	3.71353	-1.78875	0	0.295	1.09549	-0.527682	3
0000017_11.tif	CX7389	Control	11.208	10.156	5.50228	3.2936	-2.20868	0	0.295	0.971613	-0.65156	3
0000017_11.tif	CX7389	Control	13.579	10.551	5.50228	1.06331	-4.43898	0	0.295	0.313675	-1.3095	3
0000017_11.tif	CX7389	Control	9.879	10.597	5.50228	4.46169	-1.04059	0	0.295	1.3162	-0.306975	3
0000017_11.tif	CX7389	Control	13.483	10.619	5.50228	1.08124	-4.42104	0	0.295	0.318965	-1.30421	3
0000017_11.tif	CX7389	Control	10.761	10.927	5.50228	3.54084	-1.96144	0	0.295	1.04455	-0.578625	3
0000017_11.tif	CX7389	Control	14.282	10.949	5.50228	0.405044	-5.09724	0	0.295	0.119488	-1.50368	3
0000017_11.tif	CX7389	Control	10.807	11.298	5.50228	3.46945	-2.03283	0	0.295	1.02349	-0.599684	3
0000017_11.tif	CX7389	Control	10.245	11.374	5.50228	4.03105	-1.47123	0	0.295	1.18916	-0.434013	3
0000017_11.tif	CX7389	Control	26.204	11.481	5.50228	11.9287	6.4264	1	0.295	3.51896	1.89579	3
0000017_11.tif	CX7389	Control	10.533	12.051	5.50228	3.80734	-1.69494	0	0.295	1.12317	-0.500007	3
0000017_11.tif	CX7389	Control	10.134	12.651	5.50228	4.34032	-1.16196	0	0.295	1.28039	-0.342778	3
0000017_11.tif	CX7389	Control	10.64	12.75	5.50228	3.89478	-1.6075	0	0.295	1.14896	-0.474213	3
0000017_11.tif	CX7389	Control	12.144	12.96	5.50228	2.66921	-2.83307	0	0.295	0.787416	-0.835757	3
0000017_11.tif	CX7389	Control	12.3	13.136	5.50228	2.66085	-2.84143	0	0.295	0.784949	-0.838223	3
0000017_11.tif	CX7389	Control	14.485	13.246	5.50228	1.90351	-3.59877	0	0.295	0.561535	-1.06164	3
0000017_11.tif	CX7389	Control	14.544	13.47	5.50228	2.1329	-3.36938	0	0.295	0.629207	-0.993966	3
0000017_11.tif	CX7389	Control	10.994	13.833	5.50228	4.11302	-1.38926	0	0.295	1.21334	-0.409831	3
0000017_11.tif	CX7389	Control	11.033	13.992	5.50228	4.18044	-1.32184	0	0.295	1.23323	-0.389942	3
0000017_11.tif	CX7389	Control	16.282	14.263	5.50228	3.5336	-1.96868	0	0.295	1.04241	-0.580761	3
0000017_11.tif	CX7389	Control	12.838	14.363	5.50228	3.33496	-2.16733	0	0.295	0.983812	-0.639361	3
0000017_11.tif	CX7389	Control	13.683	14.559	5.50228	3.2594	-2.24288	0	0.295	0.961522	-0.66165	3
0000017_11.tif	CX7389	Control	13.009	14.907	5.50228	3.77215	-1.73013	0	0.295	1.11278	-0.510389	3
0000017_11.tif	CX7389	Control	14.481	15.567	5.50228	4.21798	-1.2843	0	0.295	1.24431	-0.378867	3
0000017_11.tif	CX7389	Control	12.803	15.571	5.50228	4.46686	-1.03542	0	0.295	1.31772	-0.30545	3
0000017_11.tif	CX7389	Control	12.507	15.612	5.50228	4.61085	-0.891432	0	0.295	1.3602	-0.262972	3
0000017_11.tif	CX7389	Control	13.728	15.951	5.50228	4.62955	-0.872733	0	0.295	1.36572	-0.257456	3
00000002_6.tif	CX7389	Control	12.781	5.64	4.37754	6.67015	2.29261	1	0.295	1.96769	0.676319	3
00000002_6.tif	CX7389	Control	13.122	5.979	4.37754	6.20311	1.82556	1	0.295	1.82992	0.538541	3
00000002_6.tif	CX7389	Control	13.145	6.805	4.37754	5.49739	1.11984	1	0.295	1.62173	0.330353	3
00000002_6.tif	CX7389	Control	15.387	7.57	4.37754	3.84373	-0.533819	0	0.295	1.1339	-0.157477	3
00000002_6.tif	CX7389	Control	15.486	7.701	4.37754	3.69341	-0.684139	0	0.295	1.08955	-0.201821	3
00000002_6.tif	CX7389	Control	13.931	7.839	4.37754	4.19973	-0.177812	0	0.295	1.23892	-0.0524547	3
00000002_6.tif	CX7389	Control	15.53	7.862	4.37754	3.52666	-0.850884	0	0.295	1.04036	-0.251011	3
00000002_6.tif	CX7389	Control	18.458	8.389	4.37754	3.6211	-0.756443	0	0.295	1.06822	-0.223151	3
00000002_6.tif	CX7389	Control	14.518	8.977	4.37754	2.93362	-1.44392	0	0.295	0.865419	-0.425957	3
00000002_6.tif	CX7389	Control	19.379	9.008	4.37754	3.83401	-0.543536	0	0.295	1.13103	-0.160343	3
00000002_6.tif	CX7389	Control	13.894	9.647	4.37754	2.92602	-1.45152	0	0.295	0.863176	-0.4282	3
00000002_6.tif	CX7389	Control	13.714	9.834	4.37754	2.97971	-1.39783	0	0.295	0.879015	-0.412361	3
00000002_6.tif	CX7389	Control	18.477	10	4.37754	2.53063	-1.84691	0	0.295	0.746537	-0.544839	3
00000002_6.tif	CX7389	Control	13.677	10.022	4.37754	2.92494	-1.4526	0	0.295	0.862859	-0.428517	3
00000002_6.tif	CX7389	Control	13.449	10.164	4.37754	3.07623	-1.30131	0	0.295	0.907489	-0.383887	3
00000002_6.tif	CX7389	Control	16.71	10.358	4.37754	1.02642	-3.35112	0	0.295	0.302795	-0.988581	3
00000002_6.tif	CX7389	Control	18.001	10.389	4.37754	1.92437	-2.45317	0	0.295	0.56769	-0.723686	3
00000002_6.tif	CX7389	Control	14.201	10.738	4.37754	2.18021	-2.19733	0	0.295	0.643163	-0.648212	3
00000002_6.tif	CX7389	Control	16.582	10.839	4.37754	0.538511	-3.83903	0	0.295	0.158861	-1.13251	3
00000002_6.tif	CX7389	Control	15.6	11.504	4.37754	0.735291	-3.64225	0	0.295	0.216911	-1.07446	3
00000002_6.tif	CX7389	Control	13.427	11.535	4.37754	2.88941	-1.48813	0	0.295	0.852376	-0.439	3
00000002_6.tif	CX7389	Control	18.896	11.711	4.37754	2.62111	-1.75644	0	0.295	0.773227	-0.518149	3
00000002_6.tif	CX7389	Control	19.664	11.861	4.37754	3.40322	-0.974321	0	0.295	1.00395	-0.287425	3
00000002_6.tif	CX7389	Control	18.47	11.995	4.37754	2.2713	-2.10624	0	0.295	0.670034	-0.621341	3
00000002_6.tif	CX7389	Control	15.695	12.668	4.37754	1.49683	-2.88071	0	0.295	0.441565	-0.849811	3
00000002_6.tif	CX7389	Control	18.832	12.79	4.37754	2.93083	-1.44671	0	0.295	0.864595	-0.42678	3
00000002_6.tif	CX7389	Control	13.808	12.855	4.37754	2.94225	-1.4353	0	0.295	0.867962	-0.423413	3
00000002_6.tif	CX7389	Control	17.792	13.031	4.37754	2.27918	-2.09836	0	0.295	0.672358	-0.619017	3
00000002_6.tif	CX7389	Control	18.32	13.234	4.37754	2.79012	-1.58742	0	0.295	0.823087	-0.468289	3
00000002_6.tif	CX7389	Control	15.911	13.302	4.37754	2.03883	-2.33872	0	0.295	0.601454	-0.689921	3
00000002_6.tif	CX7389	Control	15.522	13.474	4.37754	2.3095	-2.06804	0	0.295	0.681304	-0.610072	3
00000002_6.tif	CX7389	Control	16.129	13.583	4.37754	2.28793	-2.08961	0	0.295	0.674941	-0.616435	3
00000002_6.tif	CX7389	Control	14.349	13.688	4.37754	3.08654	-1.291	0	0.295	0.910531	-0.380845	3
00000002_6.tif	CX7389	Control	13.009	13.815	4.37754	4.14632	-0.231224	0	0.295	1.22316	-0.068211	3
00000002_6.tif	CX7389	Control	14.289	13.832	4.37754	3.23624	-1.14131	0	0.295	0.95469	-0.336686	3
00000002_6.tif	CX7389	Control	18.491	13.931	4.37754	3.41782	-0.959724	0	0.295	1.00826	-0.283118	3
00000002_6.tif	CX7389	Control	12.396	14.177	4.37754	4.85402	0.47648	1	0.295	1.43194	0.140561	3
00000002_6.tif	CX7389	Control	22.825	17.833	4.37754	9.22704	4.8495	1	0.295	2.72198	1.4306	3
0000026_16.tif	CX7389	Control	11.633	6.042	5.01555	5.26262	0.247073	1	0.295	1.55247	0.0728865	3
0000026_16.tif	CX7389	Control	13.483	6.518	5.01555	4.39546	-0.620088	0	0.295	1.29666	-0.182926	3
0000026_16.tif	CX7389	Control	13.027	7.131	5.01555	3.82779	-1.18775	0	0.295	1.1292	-0.350387	3
0000026_16.tif	CX7389	Control	13.187	7.273	5.01555	3.66487	-1.35067	0	0.295	1.08114	-0.398449	3
0000026_16.tif	CX7389	Control	14.917	7.375	5.01555	3.76293	-1.25261	0	0.295	1.11007	-0.369521	3
0000026_16.tif	CX7389	Control	11.138	7.801	5.01555	3.98524	-1.0303	0	0.295	1.17565	-0.30394	3
0000026_16.tif	CX7389	Control	10.256	7.893	5.01555	4.52683	-0.488716	0	0.295	1.33542	-0.144171	3
0000026_16.tif	CX7389	Control	17.27	8.113	5.01555	4.59112	-0.424425	0	0.295	1.35438	-0.125205	3
0000026_16.tif	CX7389	Control	14.505	8.291	5.01555	2.76225	-2.2533	0	0.295	0.814864	-0.664723	3
0000026_16.tif	CX7389	Control	14.276	8.379	5.01555	2.61311	-2.40244	0	0.295	0.770867	-0.708719	3
0000026_16.tif	CX7389	Control	14.508	8.604	5.01555	2.46843	-2.54712	0	0.295	0.728186	-0.7514	3
0000026_16.tif	CX7389	Control	12.133	8.674	5.01555	2.69169	-2.32386	0	0.295	0.794048	-0.685539	3
0000026_16.tif	CX7389	Control	16.318	8.769	5.01555	3.43708	-1.57847	0	0.295	1.01394	-0.465648	3
0000026_16.tif	CX7389	Control	15.113	8.808	5.01555	2.5733	-2.44224	0	0.295	0.759125	-0.720461	3
0000026_16.tif	CX7389	Control	17.473	8.836	5.01555	4.36741	-0.648137	0	0.295	1.28839	-0.1912	3
0000026_16.tif	CX7389	Control	16.27	8.854	5.01555	3.34677	-1.66878	0	0.295	0.987296	-0.49229	3
0000026_16.tif	CX7389	Control	17.918	9.355	5.01555	4.56159	-0.45396	0	0.295	1.34567	-0.133918	3
0000026_16.tif	CX7389	Control	9.958	9.568	5.01555	3.90989	-1.10566	0	0.295	1.15342	-0.326169	3
0000026_16.tif	CX7389	Control	9.663	9.654	5.01555	4.16139	-0.85416	0	0.295	1.22761	-0.251977	3
0000026_16.tif	CX7389	Control	11.497	9.684	5.01555	2.46074	-2.55481	0	0.295	0.725917	-0.753669	3
0000026_16.tif	CX7389	Control	11.033	9.707	5.01555	2.86252	-2.15303	0	0.295	0.844444	-0.635143	3
0000026_16.tif	CX7389	Control	16.114	9.782	5.01555	2.72853	-2.28701	0	0.295	0.804917	-0.674669	3
0000026_16.tif	CX7389	Control	15.989	10.017	5.01555	2.52272	-2.49283	0	0.295	0.744202	-0.735384	3
0000026_16.tif	CX7389	Control	9.399	10.702	5.01555	4.23616	-0.779388	0	0.295	1.24967	-0.22992	3
0000026_16.tif	CX7389	Control	17.532	10.768	5.01555	3.90462	-1.11093	0	0.295	1.15186	-0.327724	3
0000026_16.tif	CX7389	Control	17.845	11.008	5.01555	4.21612	-0.799431	0	0.295	1.24375	-0.235832	3
0000026_16.tif	CX7389	Control	17.499	11.189	5.01555	3.87897	-1.13657	0	0.295	1.1443	-0.335289	3
0000026_16.tif	CX7389	Control	17.082	11.203	5.01555	3.46433	-1.55122	0	0.295	1.02198	-0.45761	3
0000026_16.tif	CX7389	Control	9.662	11.282	5.01555	3.98531	-1.03024	0	0.295	1.17567	-0.303921	3
0000026_16.tif	CX7389	Control	10.795	11.376	5.01555	2.87288	-2.14267	0	0.295	0.8475	-0.632086	3
0000026_16.tif	CX7389	Control	15.398	11.726	5.01555	1.9468	-3.06874	0	0.295	0.574307	-0.905279	3
0000026_16.tif	CX7389	Control	16.024	11.75	5.01555	2.53676	-2.47879	0	0.295	0.748345	-0.731242	3
0000026_16.tif	CX7389	Control	15.511	11.951	5.01555	2.14936	-2.86618	0	0.295	0.634062	-0.845524	3
0000026_16.tif	CX7389	Control	10.211	12.084	5.01555	3.61462	-1.40093	0	0.295	1.06631	-0.413273	3
0000026_16.tif	CX7389	Control	15.184	12.113	5.01555	1.96462	-3.05093	0	0.295	0.579562	-0.900024	3
0000026_16.tif	CX7389	Control	11.618	12.111	5.01555	2.34268	-2.67287	0	0.295	0.69109	-0.788496	3
0000026_16.tif	CX7389	Control	11.345	12.207	5.01555	2.62695	-2.3886	0	0.295	0.774949	-0.704638	3
0000026_16.tif	CX7389	Control	11.551	12.251	5.01555	2.47343	-2.54212	0	0.295	0.729661	-0.749925	3
0000026_16.tif	CX7389	Control	17.366	12.375	5.01555	4.0126	-1.00294	0	0.295	1.18372	-0.295868	3
0000026_16.tif	CX7389	Control	15.202	13.217	5.01555	2.79085	-2.2247	0	0.295	0.823299	-0.656287	3
0000026_16.tif	CX7389	Control	15.112	13.581	5.01555	3.05372	-1.96182	0	0.295	0.900848	-0.578738	3
0000026_16.tif	CX7389	Control	14.932	13.608	5.01555	2.99483	-2.02072	0	0.295	0.883475	-0.596111	3
0000026_16.tif	CX7389	Control	15.456	13.873	5.01555	3.47961	-1.53593	0	0.295	1.02649	-0.4531	3
0000030_13.tif	CX7389	Control	12.679	2.298	4.65882	9.66783	5.00901	1	0.295	2.85201	1.47766	3
0000030_13.tif	CX7389	Control	13.603	2.65	4.65882	9.32336	4.66454	1	0.295	2.75039	1.37604	3
0000030_13.tif	CX7389	Control	7.749	5.051	4.65882	8.71771	4.05889	1	0.295	2.57172	1.19737	3
0000030_13.tif	CX7389	Control	12.241	5.856	4.65882	6.15779	1.49897	1	0.295	1.81655	0.442195	3
0000030_13.tif	CX7389	Control	12.26	5.975	4.65882	6.03731	1.37849	1	0.295	1.78101	0.406656	3
0000030_13.tif	CX7389	Control	8.443	6.072	4.65882	7.48569	2.82688	1	0.295	2.20828	0.833928	3
0000030_13.tif	CX7389	Control	8.214	6.137	4.65882	7.57927	2.92045	1	0.295	2.23589	0.861533	3
0000030_13.tif	CX7389	Control	12.707	6.968	4.65882	5.00304	0.344222	1	0.295	1.4759	0.101545	3
0000030_13.tif	CX7389	Control	11.833	7.092	4.65882	5.02028	0.361458	1	0.295	1.48098	0.10663	3
0000030_13.tif	CX7389	Control	12.004	7.207	4.65882	4.86869	0.209866	1	0.295	1.43626	0.0619105	3
0000030_13.tif	CX7389	Control	12.3	7.492	4.65882	4.53155	-0.127265	0	0.295	1.33681	-0.0375433	3
0000030_13.tif	CX7389	Control	12.439	8.34	4.65882	3.67227	-0.986549	0	0.295	1.08332	-0.291032	3
0000030_13.tif	CX7389	Control	12.626	8.569	4.65882	3.4177	-1.24112	0	0.295	1.00822	-0.36613	3
0000030_13.tif	CX7389	Control	18.834	8.579	4.65882	6.68314	2.02432	1	0.295	1.97153	0.597175	3
0000030_13.tif	CX7389	Control	11.388	9.062	4.65882	3.34802	-1.3108	0	0.295	0.987665	-0.386687	3
0000030_13.tif	CX7389	Control	22.686	9.393	4.65882	9.95415	5.29533	1	0.295	2.93647	1.56212	3
0000030_13.tif	CX7389	Control	11.858	9.524	4.65882	2.71817	-1.94065	0	0.295	0.801861	-0.572491	3
0000030_13.tif	CX7389	Control	13.321	9.619	4.65882	2.35264	-2.30618	0	0.295	0.69403	-0.680322	3
0000030_13.tif	CX7389	Control	12.927	9.724	4.65882	2.23845	-2.42037	0	0.295	0.660341	-0.71401	3
0000030_13.tif	CX7389	Control	18.921	9.737	4.65882	6.26023	1.60141	1	0.295	1.84677	0.472415	3
0000030_13.tif	CX7389	Control	15.226	9.937	4.65882	2.95659	-1.70223	0	0.295	0.872193	-0.502159	3
0000030_13.tif	CX7389	Control	9.595	10.02	4.65882	3.97713	-0.681688	0	0.295	1.17325	-0.201098	3
0000030_13.tif	CX7389	Control	15.247	10.561	4.65882	2.58837	-2.07045	0	0.295	0.763569	-0.610783	3
0000030_13.tif	CX7389	Control	11.038	10.78	4.65882	2.34704	-2.31178	0	0.295	0.692376	-0.681976	3
0000030_13.tif	CX7389	Control	14.799	10.903	4.65882	2.02716	-2.63166	0	0.295	0.598013	-0.776339	3
0000030_13.tif	CX7389	Control	10.795	11.178	4.65882	2.40311	-2.25571	0	0.295	0.708917	-0.665435	3
0000030_13.tif	CX7389	Control	11.03	11.511	4.65882	2.08645	-2.57237	0	0.295	0.615501	-0.75885	3
0000030_13.tif	CX7389	Control	15.669	11.741	4.65882	2.61004	-2.04878	0	0.295	0.769961	-0.604391	3
0000030_13.tif	CX7389	Control	9.199	11.794	4.65882	3.87247	-0.786345	0	0.295	1.14238	-0.231972	3
0000030_13.tif	CX7389	Control	15.745	11.874	4.65882	2.67832	-1.9805	0	0.295	0.790104	-0.584248	3
0000030_13.tif	CX7389	Control	16.255	12.214	4.65882	3.19727	-1.46155	0	0.295	0.943193	-0.431158	3
0000030_13.tif	CX7389	Control	16.54	12.245	4.65882	3.48384	-1.17498	0	0.295	1.02773	-0.346618	3
0000030_13.tif	CX7389	Control	8.445	12.288	4.65882	4.63476	-0.0240561	0	0.295	1.36726	-0.00709655	3
0000030_13.tif	CX7389	Control	16.405	12.359	4.65882	3.36101	-1.29781	0	0.295	0.991497	-0.382855	3
0000030_13.tif	CX7389	Control	6.648	12.499	4.65882	6.44275	1.78393	1	0.295	1.90061	0.526261	3
0000030_13.tif	CX7389	Control	15.76	12.635	4.65882	2.77582	-1.883	0	0.295	0.818868	-0.555484	3
0000030_13.tif	CX7389	Control	16.451	12.677	4.65882	3.45856	-1.20026	0	0.295	1.02028	-0.354076	3
0000030_13.tif	CX7389	Control	16.675	12.927	4.65882	3.73489	-0.923928	0	0.295	1.10179	-0.272559	3
0000030_13.tif	CX7389	Control	6.071	13.176	4.65882	7.10222	2.4434	1	0.295	2.09515	0.720803	3
0000030_13.tif	CX7389	Control	15.675	13.34	4.65882	2.95066	-1.70816	0	0.295	0.870444	-0.503908	3
0000030_13.tif	CX7389	Control	15.637	13.541	4.65882	3.01756	-1.64126	0	0.295	0.890179	-0.484172	3
0000030_13.tif	CX7389	Control	15.478	13.637	4.65882	2.9372	-1.72162	0	0.295	0.866474	-0.507878	3
0000030_13.tif	CX7389	Control	15.2	14.575	4.65882	3.37552	-1.2833	0	0.295	0.995777	-0.378574	3
0000030_13.tif	CX7389	Control	16.235	14.655	4.65882	4.15977	-0.499048	0	0.295	1.22713	-0.147219	3
0000030_13.tif	CX7389	Control	10.209	14.66	4.65882	3.93379	-0.725032	0	0.295	1.16047	-0.213884	3
0000030_13.tif	CX7389	Control	10.168	14.96	4.65882	4.17397	-0.484852	0	0.295	1.23132	-0.143031	3
0000030_13.tif	CX7389	Control	11.568	14.993	4.65882	3.38544	-1.27338	0	0.295	0.998706	-0.375646	3
0000030_13.tif	CX7389	Control	11.728	15.194	4.65882	3.50247	-1.15635	0	0.295	1.03323	-0.341123	3
0000030_13.tif	CX7389	Control	13.997	15.508	4.65882	3.66954	-0.989277	0	0.295	1.08251	-0.291837	3
0000030_13.tif	CX7389	Control	12.374	15.547	4.65882	3.65548	-1.00334	0	0.295	1.07837	-0.295984	3
0000030_13.tif	CX7389	Control	13.27	15.555	4.65882	3.60267	-1.05615	0	0.295	1.06279	-0.311565	3
0000030_13.tif	CX7389	Control	13.433	15.639	4.65882	3.69905	-0.959767	0	0.295	1.09122	-0.283131	3
0000030_13.tif	CX7389	Control	13.009	15.858	4.65882	3.90045	-0.758373	0	0.295	1.15063	-0.22372	3
0000030_13.tif	CX7389	Control	13.758	15.956	4.65882	4.05711	-0.601714	0	0.295	1.19685	-0.177506	3
0000026_19.tif	CX7389	Control	14.375	8.222	4.43246	3.42556	-1.0069	0	0.295	1.01054	-0.297036	4
0000026_19.tif	CX7389	Control	14.14	8.248	4.43246	3.35729	-1.07517	0	0.295	0.990401	-0.317176	4
0000026_19.tif	CX7389	Control	14.234	8.278	4.43246	3.34301	-1.08945	0	0.295	0.986189	-0.321387	4
0000026_19.tif	CX7389	Control	15.035	8.286	4.43246	3.56578	-0.866686	0	0.295	1.0519	-0.255672	4
0000026_19.tif	CX7389	Control	14.441	8.319	4.43246	3.34604	-1.08642	0	0.295	0.987083	-0.320494	4
0000026_19.tif	CX7389	Control	11.959	8.352	4.43246	3.62929	-0.803168	0	0.295	1.07064	-0.236934	4
0000026_19.tif	CX7389	Control	16.05	8.372	4.43246	4.00221	-0.430251	0	0.295	1.18065	-0.126924	4
0000026_19.tif	CX7389	Control	13.813	8.524	4.43246	3.04886	-1.38361	0	0.295	0.899412	-0.408164	4
0000026_19.tif	CX7389	Control	15.11	8.566	4.43246	3.34215	-1.09031	0	0.295	0.985934	-0.321642	4
0000026_19.tif	CX7389	Control	14.583	8.623	4.43246	3.09199	-1.34047	0	0.295	0.912136	-0.39544	4
0000026_19.tif	CX7389	Control	13.324	8.75	4.43246	2.83577	-1.59669	0	0.295	0.836553	-0.471023	4
0000026_19.tif	CX7389	Control	16.351	8.757	4.43246	3.90459	-0.527873	0	0.295	1.15185	-0.155722	4
0000026_19.tif	CX7389	Control	13.557	8.812	4.43246	2.75728	-1.67518	0	0.295	0.813398	-0.494179	4
0000026_19.tif	CX7389	Control	14.195	8.806	4.43246	2.81701	-1.61545	0	0.295	0.831019	-0.476558	4
0000026_19.tif	CX7389	Control	12.704	8.862	4.43246	2.86363	-1.56883	0	0.295	0.844772	-0.462804	4
0000026_19.tif	CX7389	Control	15.473	8.889	4.43246	3.2455	-1.18696	0	0.295	0.957422	-0.350154	4
0000026_19.tif	CX7389	Control	15.913	9.626	4.43246	2.98887	-1.44359	0	0.295	0.881717	-0.42586	4
0000026_19.tif	CX7389	Control	11.141	9.754	4.43246	3.08879	-1.34368	0	0.295	0.911192	-0.396385	4
0000026_19.tif	CX7389	Control	14.389	9.817	4.43246	1.90408	-2.52839	0	0.295	0.561702	-0.745874	4
0000026_19.tif	CX7389	Control	14.854	9.836	4.43246	2.11452	-2.31794	0	0.295	0.623783	-0.683793	4
0000026_19.tif	CX7389	Control	11.987	9.853	4.43246	2.38263	-2.04983	0	0.295	0.702877	-0.6047	4
0000026_19.tif	CX7389	Control	11.87	9.863	4.43246	2.45835	-1.97412	0	0.295	0.725212	-0.582364	4
0000026_19.tif	CX7389	Control	11.962	10.044	4.43246	2.26751	-2.16495	0	0.295	0.668916	-0.63866	4
0000026_19.tif	CX7389	Control	14.227	10.145	4.43246	1.53894	-2.89353	0	0.295	0.453986	-0.85359	4
0000026_19.tif	CX7389	Control	11.94	10.21	4.43246	2.17659	-2.25587	0	0.295	0.642095	-0.665481	4
0000026_19.tif	CX7389	Control	11.705	10.331	4.43246	2.29745	-2.13501	0	0.295	0.677747	-0.629829	4
0000026_19.tif	CX7389	Control	10.822	10.341	4.43246	3.07446	-1.358	0	0.295	0.906965	-0.400611	4
0000026_19.tif	CX7389	Control	10.748	10.499	4.43246	3.08419	-1.34828	0	0.295	0.909835	-0.397741	4
0000026_19.tif	CX7389	Control	11.571	10.534	4.43246	2.31388	-2.11858	0	0.295	0.682596	-0.624981	4
0000026_19.tif	CX7389	Control	12.219	10.577	4.43246	1.73325	-2.69921	0	0.295	0.51131	-0.796267	4
0000026_19.tif	CX7389	Control	10.808	10.581	4.43246	3.00001	-1.43245	0	0.295	0.885003	-0.422574	4
0000026_19.tif	CX7389	Control	12.036	10.598	4.43246	1.87535	-2.55712	0	0.295	0.553227	-0.754349	4
0000026_19.tif	CX7389	Control	14.098	10.615	4.43246	1.05691	-3.37555	0	0.295	0.311788	-0.995788	4
0000026_19.tif	CX7389	Control	12.668	10.63	4.43246	1.35151	-3.08095	0	0.295	0.398695	-0.908882	4
0000026_19.tif	CX7389	Control	11.045	10.695	4.43246	2.73886	-1.6936	0	0.295	0.807963	-0.499613	4
0000026_19.tif	CX7389	Control	11.864	10.799	4.43246	1.93626	-2.49621	0	0.295	0.571196	-0.736381	4
0000026_19.tif	CX7389	Control	11.59	10.922	4.43246	2.15033	-2.28213	0	0.295	0.634347	-0.673229	4
0000026_19.tif	CX7389	Control	15.513	10.986	4.43246	1.96038	-2.47208	0	0.295	0.578313	-0.729263	4
0000026_19.tif	CX7389	Control	13.187	11.148	4.43246	0.618479	-3.81398	0	0.295	0.182451	-1.12513	4
0000026_19.tif	CX7389	Control	14.1	11.205	4.43246	0.585192	-3.84727	0	0.295	0.172632	-1.13494	4
0000026_19.tif	CX7389	Control	15.044	11.29	4.43246	1.43028	-3.00219	0	0.295	0.421932	-0.885645	4
0000026_19.tif	CX7389	Control	13.677	11.358	4.43246	0.213063	-4.2194	0	0.295	0.0628537	-1.24472	4
0000026_19.tif	CX7389	Control	13.953	11.404	4.43246	0.352477	-4.07999	0	0.295	0.103981	-1.2036	4
0000026_19.tif	CX7389	Control	14.87	11.424	4.43246	1.23741	-3.19506	0	0.295	0.365035	-0.942541	4
0000026_19.tif	CX7389	Control	12.378	11.674	4.43246	1.26744	-3.16502	0	0.295	0.373895	-0.933682	4
0000026_19.tif	CX7389	Control	11.823	11.722	4.43246	1.82451	-2.60795	0	0.295	0.538231	-0.769346	4
0000026_19.tif	CX7389	Control	15.914	11.728	4.43246	2.27862	-2.15384	0	0.295	0.672194	-0.635382	4
0000026_19.tif	CX7389	Control	10.017	11.748	4.43246	3.62847	-0.803995	0	0.295	1.0704	-0.237179	4
0000026_19.tif	CX7389	Control	12.567	11.748	4.43246	1.08898	-3.34348	0	0.295	0.321249	-0.986327	4
0000026_19.tif	CX7389	Control	13.254	11.774	4.43246	0.438412	-3.99405	0	0.295	0.129332	-1.17824	4
0000026_19.tif	CX7389	Control	10.754	11.988	4.43246	2.91739	-1.51507	0	0.295	0.86063	-0.446946	4
0000026_19.tif	CX7389	Control	10.378	12.025	4.43246	3.29485	-1.13762	0	0.295	0.97198	-0.335596	4
0000026_19.tif	CX7389	Control	11.313	12.135	4.43246	2.39605	-2.03641	0	0.295	0.706836	-0.600741	4
0000026_19.tif	CX7389	Control	13.403	12.149	4.43246	0.627857	-3.8046	0	0.295	0.185218	-1.12236	4
0000026_19.tif	CX7389	Control	13.517	12.191	4.43246	0.63522	-3.79724	0	0.295	0.18739	-1.12019	4
0000026_19.tif	CX7389	Control	11.821	12.518	4.43246	2.05302	-2.37944	0	0.295	0.605642	-0.701935	4
0000026_19.tif	CX7389	Control	13.263	12.521	4.43246	1.02523	-3.40723	0	0.295	0.302442	-1.00513	4
0000026_19.tif	CX7389	Control	13.372	12.538	4.43246	1.00661	-3.42585	0	0.295	0.29695	-1.01063	4
0000026_19.tif	CX7389	Control	11.541	12.561	4.43246	2.32294	-2.10952	0	0.295	0.685267	-0.622309	4
0000026_19.tif	CX7389	Control	11.516	12.789	4.43246	2.45081	-1.98165	0	0.295	0.722989	-0.584588	4
0000026_19.tif	CX7389	Control	12.045	12.919	4.43246	2.09103	-2.34143	0	0.295	0.616855	-0.690722	4
0000026_19.tif	CX7389	Control	10.654	12.951	4.43246	3.29163	-1.14083	0	0.295	0.971032	-0.336544	4
0000026_19.tif	CX7389	Control	15.458	13.028	4.43246	2.3309	-2.10156	0	0.295	0.687615	-0.619961	4
0000026_19.tif	CX7389	Control	11.217	13.064	4.43246	2.84847	-1.58399	0	0.295	0.840299	-0.467277	4
0000026_19.tif	CX7389	Control	13.203	13.168	4.43246	1.65887	-2.77359	0	0.295	0.489366	-0.81821	4
0000026_19.tif	CX7389	Control	16.456	13.23	4.43246	3.26902	-1.16345	0	0.295	0.96436	-0.343217	4
0000026_19.tif	CX7389	Control	12.066	13.441	4.43246	2.44719	-1.98527	0	0.295	0.721922	-0.585654	4
0000026_19.tif	CX7389	Control	12.906	13.512	4.43246	2.07831	-2.35416	0	0.295	0.613101	-0.694476	4
0000026_19.tif	CX7389	Control	13.636	13.54	4.43246	1.97201	-2.46046	0	0.295	0.581742	-0.725835	4
0000026_19.tif	CX7389	Control	13.784	13.561	4.43246	1.99812	-2.43434	0	0.295	0.589446	-0.71813	4
0000026_19.tif	CX7389	Control	11.746	13.632	4.43246	2.80199	-1.63048	0	0.295	0.826586	-0.480991	4
0000026_19.tif	CX7389	Control	14.303	13.675	4.43246	2.20855	-2.22391	0	0.295	0.651522	-0.656054	4
0000026_19.tif	CX7389	Control	12.868	13.733	4.43246	2.29886	-2.1336	0	0.295	0.678163	-0.629413	4
0000026_19.tif	CX7389	Control	12.303	14.025	4.43246	2.79769	-1.63477	0	0.295	0.82532	-0.482257	4
0000026_19.tif	CX7389	Control	12.137	14.151	4.43246	2.98896	-1.4435	0	0.295	0.881744	-0.425832	4
0000026_19.tif	CX7389	Control	12.196	14.217	4.43246	3.01749	-1.41498	0	0.295	0.890159	-0.417418	4
0000026_19.tif	CX7389	Control	12.858	14.205	4.43246	2.75079	-1.68167	0	0.295	0.811484	-0.496093	4
0000026_19.tif	CX7389	Control	15.374	14.631	4.43246	3.51927	-0.913193	0	0.295	1.03818	-0.269392	4
0000026_19.tif	CX7389	Control	13.851	15.103	4.43246	3.54123	-0.89123	0	0.295	1.04466	-0.262913	4
0000026_19.tif	CX7389	Control	14.258	15.488	4.43246	3.96826	-0.464202	0	0.295	1.17064	-0.13694	4
0000026_19.tif	CX7389	Control	14.274	15.718	4.43246	4.198	-0.234464	0	0.295	1.23841	-0.0691669	4
0000026_19.tif	CX7389	Control	14.368	15.889	4.43246	4.38173	-0.050731	0	0.295	1.29261	-0.0149656	4
0000026_19.tif	CX7389	Control	13.611	16.046	4.43246	4.4781	0.0456381	1	0.295	1.32104	0.0134632	4
0000026_19.tif	CX7389	Control	14.336	21.472	4.43246	9.92836	5.49589	1	0.295	2.92886	1.62129	4
0000018_19.tif	CX7389	Control	11.982	6.364	4.66148	6.99452	2.33304	1	0.295	2.06338	0.688246	4
0000018_19.tif	CX7389	Control	14.874	8.395	4.66148	4.77465	0.113164	1	0.295	1.40852	0.0333832	4
0000018_19.tif	CX7389	Control	17.975	8.465	4.66148	6.12673	1.46524	1	0.295	1.80738	0.432247	4
0000018_19.tif	CX7389	Control	15.149	8.619	4.66148	4.61921	-0.0422713	0	0.295	1.36267	-0.01247	4
0000018_19.tif	CX7389	Control	15.153	8.874	4.66148	4.37467	-0.286816	0	0.295	1.29053	-0.0846106	4
0000018_19.tif	CX7389	Control	14.717	9.417	4.66148	3.74192	-0.919559	0	0.295	1.10387	-0.27127	4
0000018_19.tif	CX7389	Control	13.648	9.492	4.66148	3.59811	-1.06337	0	0.295	1.06144	-0.313694	4
0000018_19.tif	CX7389	Control	12.472	9.637	4.66148	3.74223	-0.919248	0	0.295	1.10396	-0.271178	4
0000018_19.tif	CX7389	Control	14.284	9.83	4.66148	3.26585	-1.39563	0	0.295	0.963426	-0.411711	4
0000018_19.tif	CX7389	Control	12.517	9.886	4.66148	3.49605	-1.16544	0	0.295	1.03133	-0.343804	4
0000018_19.tif	CX7389	Control	14.288	10.033	4.66148	3.06448	-1.597	0	0.295	0.904022	-0.471115	4
0000018_19.tif	CX7389	Control	12.566	10.429	4.66148	2.98552	-1.67596	0	0.295	0.880728	-0.494409	4
0000018_19.tif	CX7389	Control	12.297	10.455	4.66148	3.09668	-1.5648	0	0.295	0.913521	-0.461616	4
0000018_19.tif	CX7389	Control	15.924	10.543	4.66148	3.21723	-1.44425	0	0.295	0.949084	-0.426054	4
0000018_19.tif	CX7389	Control	16.28	10.56	4.66148	3.43539	-1.22609	0	0.295	1.01344	-0.361698	4
0000018_19.tif	CX7389	Control	16.193	10.535	4.66148	3.39549	-1.26599	0	0.295	1.00167	-0.373468	4
0000018_19.tif	CX7389	Control	9.895	10.601	4.66148	4.74572	0.0842343	1	0.295	1.39999	0.0248491	4
0000018_19.tif	CX7389	Control	10.933	10.625	4.66148	3.88295	-0.778532	0	0.295	1.14547	-0.229667	4
0000018_19.tif	CX7389	Control	12.393	10.622	4.66148	2.90421	-1.75727	0	0.295	0.856742	-0.518396	4
0000018_19.tif	CX7389	Control	12.448	10.72	4.66148	2.79199	-1.8695	0	0.295	0.823636	-0.551501	4
0000018_19.tif	CX7389	Control	12.335	10.767	4.66148	2.81538	-1.8461	0	0.295	0.830538	-0.544599	4
0000018_19.tif	CX7389	Control	16.203	10.798	4.66148	3.2103	-1.45119	0	0.295	0.947037	-0.4281	4
0000018_19.tif	CX7389	Control	20.415	10.835	4.66148	6.84966	2.18818	1	0.295	2.02065	0.645512	4
0000018_19.tif	CX7389	Control	14.815	10.913	4.66148	2.33401	-2.32747	0	0.295	0.688533	-0.686604	4
0000018_19.tif	CX7389	Control	15.907	10.93	4.66148	2.91053	-1.75095	0	0.295	0.858607	-0.51653	4
0000018_19.tif	CX7389	Control	11.329	10.986	4.66148	3.34805	-1.31343	0	0.295	0.987676	-0.387462	4
0000018_19.tif	CX7389	Control	14.973	10.979	4.66148	2.3381	-2.32339	0	0.295	0.689739	-0.685399	4
0000018_19.tif	CX7389	Control	16.637	11.006	4.66148	3.39865	-1.26283	0	0.295	1.0026	-0.372536	4
0000018_19.tif	CX7389	Control	9.993	11.228	4.66148	4.36177	-0.299717	0	0.295	1.28672	-0.0884166	4
0000018_19.tif	CX7389	Control	11.374	11.235	4.66148	3.16171	-1.49977	0	0.295	0.932704	-0.442433	4
0000018_19.tif	CX7389	Control	15.239	11.274	4.66148	2.22127	-2.44021	0	0.295	0.655274	-0.719863	4
0000018_19.tif	CX7389	Control	10.493	11.296	4.66148	3.88304	-0.77844	0	0.295	1.1455	-0.22964	4
0000018_19.tif	CX7389	Control	15.859	11.429	4.66148	2.5279	-2.13359	0	0.295	0.745729	-0.629408	4
0000018_19.tif	CX7389	Control	16.889	11.455	4.66148	3.36349	-1.298	0	0.295	0.992229	-0.382909	4
0000018_19.tif	CX7389	Control	12.596	11.532	4.66148	2.05049	-2.61099	0	0.295	0.604896	-0.770242	4
0000018_19.tif	CX7389	Control	11.95	11.602	4.66148	2.48005	-2.18144	0	0.295	0.731613	-0.643524	4
0000018_19.tif	CX7389	Control	11.763	11.686	4.66148	2.58652	-2.07497	0	0.295	0.763022	-0.612115	4
0000018_19.tif	CX7389	Control	11.386	11.754	4.66148	2.87945	-1.78203	0	0.295	0.849437	-0.5257	4
0000018_19.tif	CX7389	Control	14.947	11.775	4.66148	1.64494	-3.01654	0	0.295	0.485257	-0.88988	4
0000018_19.tif	CX7389	Control	16.496	11.901	4.66148	2.81125	-1.85023	0	0.295	0.829319	-0.545818	4
0000018_19.tif	CX7389	Control	12.009	11.924	4.66148	2.25213	-2.40936	0	0.295	0.664377	-0.71076	4
0000018_19.tif	CX7389	Control	12.989	11.986	4.66148	1.45003	-3.21146	0	0.295	0.427758	-0.947379	4
0000018_19.tif	CX7389	Control	16.232	12.083	4.66148	2.49591	-2.16558	0	0.295	0.736292	-0.638845	4
0000018_19.tif	CX7389	Control	10.715	12.319	4.66148	3.31603	-1.34545	0	0.295	0.978229	-0.396908	4
0000018_19.tif	CX7389	Control	10.671	12.49	4.66148	3.32441	-1.33707	0	0.295	0.980702	-0.394435	4
0000018_19.tif	CX7389	Control	17.016	12.71	4.66148	3.09496	-1.56653	0	0.295	0.913012	-0.462125	4
0000018_19.tif	CX7389	Control	16.917	12.767	4.66148	2.99022	-1.67127	0	0.295	0.882114	-0.493024	4
0000018_19.tif	CX7389	Control	17.151	12.761	4.66148	3.22362	-1.43786	0	0.295	0.950969	-0.424168	4
0000018_19.tif	CX7389	Control	10.667	12.766	4.66148	3.29082	-1.37066	0	0.295	0.970793	-0.404345	4
0000018_19.tif	CX7389	Control	16.183	12.883	4.66148	2.24847	-2.41301	0	0.295	0.663299	-0.711838	4
0000018_19.tif	CX7389	Control	10.957	12.962	4.66148	2.98825	-1.67323	0	0.295	0.881534	-0.493603	4
0000018_19.tif	CX7389	Control	9.883	12.944	4.66148	4.06221	-0.599272	0	0.295	1.19835	-0.176785	4
0000018_19.tif	CX7389	Control	13.529	13.586	4.66148	0.655332	-4.00615	0	0.295	0.193323	-1.18181	4
0000018_19.tif	CX7389	Control	12.853	13.674	4.66148	1.2423	-3.41918	0	0.295	0.366479	-1.00866	4
0000018_19.tif	CX7389	Control	11.085	13.784	4.66148	2.94391	-1.71757	0	0.295	0.868453	-0.506684	4
0000018_19.tif	CX7389	Control	16.778	13.997	4.66148	2.98023	-1.68125	0	0.295	0.879169	-0.495969	4
0000018_19.tif	CX7389	Control	12.853	14.012	4.66148	1.43543	-3.22605	0	0.295	0.423452	-0.951686	4
0000018_19.tif	CX7389	Control	17.915	14.15	4.66148	4.11412	-0.547365	0	0.295	1.21366	-0.161473	4
0000018_19.tif	CX7389	Control	12.117	14.164	4.66148	2.12454	-2.53694	0	0.295	0.626739	-0.748398	4
0000018_19.tif	CX7389	Control	16.377	14.194	4.66148	2.67765	-1.98383	0	0.295	0.789907	-0.585231	4
0000018_19.tif	CX7389	Control	13.921	14.256	4.66148	1.17821	-3.48328	0	0.295	0.347571	-1.02757	4
0000018_19.tif	CX7389	Control	16.562	14.276	4.66148	2.87999	-1.78149	0	0.295	0.849598	-0.525539	4
0000018_19.tif	CX7389	Control	16.418	14.433	4.66148	2.82164	-1.83984	0	0.295	0.832384	-0.542754	4
0000018_19.tif	CX7389	Control	18.73	14.502	4.66148	4.99431	0.332828	1	0.295	1.47332	0.0981843	4
0000018_19.tif	CX7389	Control	17.473	14.504	4.66148	3.80715	-0.854335	0	0.295	1.12311	-0.252029	4
0000018_19.tif	CX7389	Control	18.361	14.536	4.66148	4.65236	-0.00911937	0	0.295	1.37245	-0.00269021	4
0000018_19.tif	CX7389	Control	17.339	14.571	4.66148	3.7097	-0.951784	0	0.295	1.09436	-0.280776	4
0000018_19.tif	CX7389	Control	11.507	14.645	4.66148	2.89648	-1.76501	0	0.295	0.854461	-0.520676	4
0000018_19.tif	CX7389	Control	16.397	14.754	4.66148	2.97172	-1.68977	0	0.295	0.876656	-0.498481	4
0000018_19.tif	CX7389	Control	13.94	14.771	4.66148	1.693	-2.96848	0	0.295	0.499436	-0.875702	4
0000018_19.tif	CX7389	Control	16.655	14.778	4.66148	3.20077	-1.46071	0	0.295	0.944228	-0.43091	4
0000018_19.tif	CX7389	Control	17.398	14.944	4.66148	3.9267	-0.734782	0	0.295	1.15838	-0.216761	4
0000018_19.tif	CX7389	Control	13.868	14.957	4.66148	1.8805	-2.78099	0	0.295	0.554746	-0.820391	4
0000018_19.tif	CX7389	Control	12.526	15.038	4.66148	2.41857	-2.24291	0	0.295	0.713479	-0.661659	4
0000018_19.tif	CX7389	Control	16.907	15.158	4.66148	3.62101	-1.04048	0	0.295	1.0682	-0.30694	4
0000018_19.tif	CX7389	Control	12.26	15.346	4.66148	2.82424	-1.83725	0	0.295	0.83315	-0.541988	4
0000018_19.tif	CX7389	Control	16.489	15.525	4.66148	3.53128	-1.1302	0	0.295	1.04173	-0.33341	4
0000018_19.tif	CX7389	Control	15.972	15.644	4.66148	3.27127	-1.39021	0	0.295	0.965024	-0.410113	4
0000018_19.tif	CX7389	Control	16.163	15.7	4.66148	3.43559	-1.22589	0	0.295	1.0135	-0.361638	4
0000018_19.tif	CX7389	Control	12.906	15.725	4.66148	2.84288	-1.8186	0	0.295	0.83865	-0.536487	4
0000018_19.tif	CX7389	Control	13.757	15.735	4.66148	2.6635	-1.99798	0	0.295	0.785733	-0.589404	4
0000018_19.tif	CX7389	Control	17.351	15.754	4.66148	4.33306	-0.328419	0	0.295	1.27825	-0.0968837	4
0000018_19.tif	CX7389	Control	14.429	15.851	4.66148	2.81527	-1.84622	0	0.295	0.830504	-0.544634	4
0000018_19.tif	CX7389	Control	13.066	15.864	4.66148	2.92077	-1.74071	0	0.295	0.861629	-0.513509	4
0000018_19.tif	CX7389	Control	16.816	15.884	4.66148	4.01594	-0.645544	0	0.295	1.1847	-0.190436	4
0000018_19.tif	CX7389	Control	15.894	15.924	4.66148	3.45052	-1.21096	0	0.295	1.0179	-0.357233	4
0000018_19.tif	CX7389	Control	12.837	15.927	4.66148	3.05615	-1.60534	0	0.295	0.901563	-0.473574	4
0000018_19.tif	CX7389	Control	16.69	15.951	4.66148	3.97494	-0.686544	0	0.295	1.17261	-0.202531	4
0000018_19.tif	CX7389	Control	13.411	15.972	4.66148	2.94249	-1.71899	0	0.295	0.868035	-0.507102	4
0000018_19.tif	CX7389	Control	13.824	16.032	4.66148	2.9564	-1.70509	0	0.295	0.872137	-0.503001	4
0000018_19.tif	CX7389	Control	13.251	16.023	4.66148	3.02521	-1.63627	0	0.295	0.892437	-0.482701	4
0000018_19.tif	CX7389	Control	12.438	16.214	4.66148	3.47844	-1.18305	0	0.295	1.02614	-0.348999	4
0000018_19.tif	CX7389	Control	12.506	16.293	4.66148	3.52153	-1.13995	0	0.295	1.03885	-0.336285	4
0000018_19.tif	CX7389	Control	13.998	16.411	4.66148	3.33345	-1.32803	0	0.295	0.983369	-0.391769	4
0000018_19.tif	CX7389	Control	12.847	16.444	4.66148	3.53994	-1.12154	0	0.295	1.04428	-0.330855	4
0000018_19.tif	CX7389	Control	14.789	16.493	4.66148	3.51823	-1.14325	0	0.295	1.03788	-0.33726	4
0000018_19.tif	CX7389	Control	16.229	16.75	4.66148	4.32543	-0.336049	0	0.295	1.276	-0.0991345	4
0000018_19.tif	CX7389	Control	14.121	16.975	4.66148	3.90106	-0.76042	0	0.295	1.15081	-0.224324	4
0000018_19.tif	CX7389	Control	13.342	17.208	4.66148	4.1735	-0.487983	0	0.295	1.23118	-0.143955	4
0000018_19.tif	CX7389	Control	13.177	17.275	4.66148	4.26633	-0.395154	0	0.295	1.25857	-0.11657	4
0000018_19.tif	CX7389	Control	17.403	18.141	4.66148	6.13234	1.47085	1	0.295	1.80904	0.433902	4
0000017_19.tif	CX7389	Control	13.276	7.891	5.16907	3.68138	-1.48768	0	0.295	1.08601	-0.438866	4
0000017_19.tif	CX7389	Control	16.968	7.884	5.16907	3.36235	-1.80672	0	0.295	0.991892	-0.532982	4
0000017_19.tif	CX7389	Control	17.616	8.056	5.16907	3.56604	-1.60303	0	0.295	1.05198	-0.472894	4
0000017_19.tif	CX7389	Control	14.483	8.288	5.16907	2.75557	-2.4135	0	0.295	0.812893	-0.711981	4
0000017_19.tif	CX7389	Control	14.251	8.385	5.16907	2.75588	-2.41319	0	0.295	0.812984	-0.711891	4
0000017_19.tif	CX7389	Control	13.024	8.544	5.16907	3.35142	-1.81765	0	0.295	0.988669	-0.536205	4
0000017_19.tif	CX7389	Control	14.668	8.544	5.16907	2.45301	-2.71606	0	0.295	0.723638	-0.801237	4
0000017_19.tif	CX7389	Control	12.202	8.642	5.16907	3.92673	-1.24234	0	0.295	1.15838	-0.36649	4
0000017_19.tif	CX7389	Control	12.741	8.652	5.16907	3.49045	-1.67862	0	0.295	1.02968	-0.495193	4
0000017_19.tif	CX7389	Control	11.623	9.277	5.16907	4.13063	-1.03844	0	0.295	1.21854	-0.30634	4
0000017_19.tif	CX7389	Control	11.705	9.373	5.16907	4.01827	-1.15079	0	0.295	1.18539	-0.339484	4
0000017_19.tif	CX7389	Control	12.023	9.393	5.16907	3.7172	-1.45186	0	0.295	1.09658	-0.4283	4
0000017_19.tif	CX7389	Control	12.947	9.449	5.16907	2.86508	-2.30398	0	0.295	0.8452	-0.679675	4
0000017_19.tif	CX7389	Control	19.019	9.503	5.16907	3.84044	-1.32863	0	0.295	1.13293	-0.391946	4
0000017_19.tif	CX7389	Control	13.174	9.774	5.16907	2.51212	-2.65694	0	0.295	0.741076	-0.783798	4
0000017_19.tif	CX7389	Control	13.071	9.943	5.16907	2.5383	-2.63077	0	0.295	0.748797	-0.776077	4
0000017_19.tif	CX7389	Control	12.105	10.109	5.16907	3.41404	-1.75502	0	0.295	1.00714	-0.517732	4
0000017_19.tif	CX7389	Control	13.097	10.21	5.16907	2.42785	-2.74122	0	0.295	0.716215	-0.808659	4
0000017_19.tif	CX7389	Control	18.214	10.218	5.16907	2.85853	-2.31054	0	0.295	0.843265	-0.681609	4
0000017_19.tif	CX7389	Control	11.376	10.234	5.16907	4.10634	-1.06273	0	0.295	1.21137	-0.313505	4
0000017_19.tif	CX7389	Control	19.259	10.236	5.16907	3.87998	-1.28909	0	0.295	1.14459	-0.38028	4
0000017_19.tif	CX7389	Control	12.707	10.255	5.16907	2.79464	-2.37442	0	0.295	0.824419	-0.700455	4
0000017_19.tif	CX7389	Control	19.337	10.295	5.16907	3.94784	-1.22123	0	0.295	1.16461	-0.360262	4
0000017_19.tif	CX7389	Control	15.123	10.302	5.16907	0.651007	-4.51806	0	0.295	0.192047	-1.33283	4
0000017_19.tif	CX7389	Control	15.803	10.421	5.16907	0.586308	-4.58276	0	0.295	0.172961	-1.35191	4
0000017_19.tif	CX7389	Control	19.191	10.536	5.16907	3.77426	-1.39481	0	0.295	1.11341	-0.411469	4
0000017_19.tif	CX7389	Control	18.486	10.631	5.16907	3.06373	-2.10533	0	0.295	0.903801	-0.621074	4
0000017_19.tif	CX7389	Control	16.889	10.683	5.16907	1.4696	-3.69947	0	0.295	0.433531	-1.09134	4
0000017_19.tif	CX7389	Control	15.299	11.025	5.16907	0.200472	-4.96859	0	0.295	0.0591392	-1.46574	4
0000017_19.tif	CX7389	Control	12.855	11.238	5.16907	2.60244	-2.56663	0	0.295	0.76772	-0.757155	4
0000017_19.tif	CX7389	Control	14.922	11.286	5.16907	0.654997	-4.51407	0	0.295	0.193224	-1.33165	4
0000017_19.tif	CX7389	Control	14.366	11.395	5.16907	1.18607	-3.983	0	0.295	0.34989	-1.17498	4
0000017_19.tif	CX7389	Control	12.901	11.479	5.16907	2.60207	-2.56699	0	0.295	0.767611	-0.757264	4
0000017_19.tif	CX7389	Control	18.034	11.657	5.16907	2.71697	-2.4521	0	0.295	0.801506	-0.723368	4
0000017_19.tif	CX7389	Control	15.721	11.669	5.16907	0.84496	-4.32411	0	0.295	0.249263	-1.27561	4
0000017_19.tif	CX7389	Control	18.562	11.972	5.16907	3.31667	-1.8524	0	0.295	0.978418	-0.546457	4
0000017_19.tif	CX7389	Control	15.852	11.976	5.16907	1.17839	-3.99068	0	0.295	0.347625	-1.17725	4
0000017_19.tif	CX7389	Control	14.099	11.992	5.16907	1.73913	-3.42994	0	0.295	0.513044	-1.01183	4
0000017_19.tif	CX7389	Control	13.117	12.213	5.16907	2.67385	-2.49522	0	0.295	0.788785	-0.736089	4
0000017_19.tif	CX7389	Control	14.638	12.394	5.16907	1.714	-3.45507	0	0.295	0.50563	-1.01924	4
0000017_19.tif	CX7389	Control	19.021	12.504	5.16907	3.94139	-1.22768	0	0.295	1.16271	-0.362164	4
0000017_19.tif	CX7389	Control	14.418	12.544	5.16907	1.95288	-3.21618	0	0.295	0.576101	-0.948774	4
0000017_19.tif	CX7389	Control	17.331	12.583	5.16907	2.55411	-2.61496	0	0.295	0.753462	-0.771413	4
0000017_19.tif	CX7389	Control	18.89	12.999	5.16907	4.05822	-1.11085	0	0.295	1.19717	-0.3277	4
0000017_19.tif	CX7389	Control	14.039	13.091	5.16907	2.61746	-2.55161	0	0.295	0.772151	-0.752724	4
0000017_19.tif	CX7389	Control	12.613	13.15	5.16907	3.62248	-1.54658	0	0.295	1.06863	-0.456242	4
0000017_19.tif	CX7389	Control	17.77	13.183	5.16907	3.28529	-1.88378	0	0.295	0.96916	-0.555715	4
0000017_19.tif	CX7389	Control	17.891	13.211	5.16907	3.39169	-1.77737	0	0.295	1.00055	-0.524325	4
0000017_19.tif	CX7389	Control	17.427	13.276	5.16907	3.12167	-2.0474	0	0.295	0.920893	-0.603982	4
0000017_19.tif	CX7389	Control	13.294	13.354	5.16907	3.2736	-1.89546	0	0.295	0.965713	-0.559161	4
0000017_19.tif	CX7389	Control	16.078	13.339	5.16907	2.54728	-2.62179	0	0.295	0.751446	-0.773428	4
0000017_19.tif	CX7389	Control	17	13.361	5.16907	2.93919	-2.22988	0	0.295	0.86706	-0.657815	4
0000017_19.tif	CX7389	Control	12.893	13.455	5.16907	3.6198	-1.54927	0	0.295	1.06784	-0.457035	4
0000017_19.tif	CX7389	Control	17.512	13.502	5.16907	3.35075	-1.81832	0	0.295	0.988471	-0.536403	4
0000017_19.tif	CX7389	Control	14.91	13.561	5.16907	2.73625	-2.43281	0	0.295	0.807195	-0.71768	4
0000017_19.tif	CX7389	Control	13.183	13.591	5.16907	3.52628	-1.64279	0	0.295	1.04025	-0.484622	4
0000017_19.tif	CX7389	Control	13.152	13.809	5.16907	3.71574	-1.45332	0	0.295	1.09614	-0.42873	4
0000004_19.tif	CX7389	Control	11.838	4.832	5.15652	7.72518	2.56866	1	0.295	2.27893	0.757756	4
0000004_19.tif	CX7389	Control	12.832	6.14	5.15652	6.12816	0.971639	1	0.295	1.80781	0.286634	4
0000004_19.tif	CX7389	Control	14.964	6.782	5.15652	5.04357	-0.11295	0	0.295	1.48785	-0.0333201	4
0000004_19.tif	CX7389	Control	14.164	6.907	5.15652	5.00905	-0.14747	0	0.295	1.47767	-0.0435038	4
0000004_19.tif	CX7389	Control	12.8	8.339	5.15652	4.18854	-0.967978	0	0.295	1.23562	-0.285554	4
0000004_19.tif	CX7389	Control	16.558	8.348	5.15652	3.75887	-1.39765	0	0.295	1.10887	-0.412306	4
0000004_19.tif	CX7389	Control	15.755	8.4	5.15652	3.48049	-1.67603	0	0.295	1.02675	-0.494428	4
0000004_19.tif	CX7389	Control	9.39	8.758	5.15652	6.50265	1.34613	1	0.295	1.91828	0.397108	4
0000004_19.tif	CX7389	Control	16.66	8.963	5.15652	3.24589	-1.91063	0	0.295	0.957539	-0.563635	4
0000004_19.tif	CX7389	Control	16.184	9.044	5.15652	2.97394	-2.18258	0	0.295	0.877312	-0.643861	4
0000004_19.tif	CX7389	Control	16.826	9.133	5.15652	3.18269	-1.97383	0	0.295	0.938893	-0.582281	4
0000004_19.tif	CX7389	Control	12.707	9.127	5.15652	3.62148	-1.53504	0	0.295	1.06834	-0.452836	4
0000004_19.tif	CX7389	Control	14.33	9.241	5.15652	2.70162	-2.4549	0	0.295	0.796978	-0.724196	4
0000004_19.tif	CX7389	Control	14.998	9.445	5.15652	2.38139	-2.77513	0	0.295	0.70251	-0.818664	4
0000004_19.tif	CX7389	Control	14.021	9.722	5.15652	2.3734	-2.78312	0	0.295	0.700152	-0.821021	4
0000004_19.tif	CX7389	Control	16.857	9.953	5.15652	2.54887	-2.60765	0	0.295	0.751916	-0.769258	4
0000004_19.tif	CX7389	Control	16.345	9.999	5.15652	2.1944	-2.96212	0	0.295	0.647347	-0.873826	4
0000004_19.tif	CX7389	Control	12.958	9.998	5.15652	2.83311	-2.32341	0	0.295	0.835768	-0.685406	4
0000004_19.tif	CX7389	Control	14.641	10.122	5.15652	1.76852	-3.388	0	0.295	0.521713	-0.99946	4
0000004_19.tif	CX7389	Control	9.314	10.198	5.15652	6.03393	0.877413	1	0.295	1.78001	0.258837	4
0000004_19.tif	CX7389	Control	16.528	10.248	5.15652	2.10927	-3.04725	0	0.295	0.622236	-0.898938	4
0000004_19.tif	CX7389	Control	16.722	10.266	5.15652	2.23039	-2.92613	0	0.295	0.657966	-0.863207	4
0000004_19.tif	CX7389	Control	11.442	10.528	5.15652	3.90404	-1.25248	0	0.295	1.15169	-0.369482	4
0000004_19.tif	CX7389	Control	15.096	11.108	5.15652	0.715588	-4.44093	0	0.295	0.211098	-1.31007	4
0000004_19.tif	CX7389	Control	14.495	11.126	5.15652	0.939526	-4.21699	0	0.295	0.27716	-1.24401	4
0000004_19.tif	CX7389	Control	13.429	11.227	5.15652	1.79767	-3.35885	0	0.295	0.530314	-0.99086	4
0000004_19.tif	CX7389	Control	9.286	11.406	5.15652	5.85387	0.697351	1	0.295	1.72689	0.205719	4
0000004_19.tif	CX7389	Control	19.716	11.421	5.15652	4.60857	-0.547953	0	0.295	1.35953	-0.161646	4
0000004_19.tif	CX7389	Control	11.593	11.452	5.15652	3.55143	-1.60509	0	0.295	1.04767	-0.473501	4
0000004_19.tif	CX7389	Control	13.63	11.465	5.15652	1.53727	-3.61925	0	0.295	0.453494	-1.06768	4
0000004_19.tif	CX7389	Control	14.173	11.475	5.15652	1.01361	-4.14291	0	0.295	0.299015	-1.22216	4
0000004_19.tif	CX7389	Control	13.632	11.568	5.15652	1.51462	-3.6419	0	0.295	0.446813	-1.07436	4
0000004_19.tif	CX7389	Control	14.189	11.722	5.15652	0.941433	-4.21509	0	0.295	0.277723	-1.24345	4
0000004_19.tif	CX7389	Control	13.882	11.756	5.15652	1.2448	-3.91172	0	0.295	0.367217	-1.15396	4
0000004_19.tif	CX7389	Control	14.254	11.809	5.15652	0.871113	-4.28541	0	0.295	0.256978	-1.2642	4
0000004_19.tif	CX7389	Control	12.946	12.2	5.15652	2.21137	-2.94515	0	0.295	0.652355	-0.868818	4
0000004_19.tif	CX7389	Control	12.354	12.23	5.15652	2.80073	-2.35579	0	0.295	0.826215	-0.694958	4
0000004_19.tif	CX7389	Control	16.385	12.526	5.15652	1.44285	-3.71367	0	0.295	0.42564	-1.09553	4
0000004_19.tif	CX7389	Control	17.496	12.677	5.15652	2.52011	-2.63641	0	0.295	0.743433	-0.777741	4
0000004_19.tif	CX7389	Control	17.955	12.847	5.15652	3.00956	-2.14696	0	0.295	0.887821	-0.633352	4
0000004_19.tif	CX7389	Control	13.923	12.956	5.15652	1.65182	-3.5047	0	0.295	0.487285	-1.03389	4
0000004_19.tif	CX7389	Control	13.223	12.991	5.15652	2.232	-2.92452	0	0.295	0.65844	-0.862733	4
0000004_19.tif	CX7389	Control	13.208	13.074	5.15652	2.28908	-2.86744	0	0.295	0.675279	-0.845895	4
0000004_19.tif	CX7389	Control	11.755	13.12	5.15652	3.61097	-1.54555	0	0.295	1.06524	-0.455937	4
0000004_19.tif	CX7389	Control	13.794	13.148	5.15652	1.87808	-3.27844	0	0.295	0.554034	-0.96714	4
0000004_19.tif	CX7389	Control	14.254	13.167	5.15652	1.60155	-3.55497	0	0.295	0.472459	-1.04871	4
0000004_19.tif	CX7389	Control	14.008	13.428	5.15652	1.95543	-3.20109	0	0.295	0.576852	-0.944321	4
0000004_19.tif	CX7389	Control	17.156	13.409	5.15652	2.57689	-2.57963	0	0.295	0.760182	-0.760991	4
0000004_19.tif	CX7389	Control	17.897	13.426	5.15652	3.20212	-1.9544	0	0.295	0.944626	-0.576547	4
0000004_19.tif	CX7389	Control	18.164	13.483	5.15652	3.46282	-1.6937	0	0.295	1.02153	-0.499642	4
0000004_19.tif	CX7389	Control	17.011	13.601	5.15652	2.59196	-2.56456	0	0.295	0.76463	-0.756544	4
0000004_19.tif	CX7389	Control	17.407	13.635	5.15652	2.91391	-2.24261	0	0.295	0.859603	-0.66157	4
0000004_19.tif	CX7389	Control	19.255	13.894	5.15652	4.62017	-0.536353	0	0.295	1.36295	-0.158224	4
0000004_19.tif	CX7389	Control	19.078	14.218	5.15652	4.62193	-0.53459	0	0.295	1.36347	-0.157704	4
0000004_19.tif	CX7389	Control	18.05	14.284	5.15652	3.82258	-1.33394	0	0.295	1.12766	-0.393511	4
0000004_19.tif	CX7389	Control	18.874	14.279	5.15652	4.48185	-0.674675	0	0.295	1.32214	-0.199029	4
0000004_19.tif	CX7389	Control	12.741	14.44	5.15652	3.54008	-1.61644	0	0.295	1.04432	-0.476851	4
0000004_19.tif	CX7389	Control	12.817	14.521	5.15652	3.5505	-1.60602	0	0.295	1.0474	-0.473775	4
0000004_19.tif	CX7389	Control	13.554	14.584	5.15652	3.17666	-1.97986	0	0.295	0.937114	-0.584059	4
0000004_19.tif	CX7389	Control	18.772	14.576	5.15652	4.56942	-0.587098	0	0.295	1.34798	-0.173194	4
0000004_19.tif	CX7389	Control	18.693	14.761	5.15652	4.62195	-0.534565	0	0.295	1.36348	-0.157697	4
0000004_19.tif	CX7389	Control	16.072	14.851	5.15652	3.17263	-1.98389	0	0.295	0.935926	-0.585247	4
0000004_19.tif	CX7389	Control	11.636	14.876	5.15652	4.63615	-0.520365	0	0.295	1.36767	-0.153508	4
0000004_19.tif	CX7389	Control	12.134	14.865	5.15652	4.26613	-0.890392	0	0.295	1.25851	-0.262666	4
0000004_19.tif	CX7389	Control	11.575	15.028	5.15652	4.78273	-0.373788	0	0.295	1.41091	-0.110267	4
0000004_19.tif	CX7389	Control	13.594	15.076	5.15652	3.59527	-1.56125	0	0.295	1.0606	-0.460569	4
0000004_19.tif	CX7389	Control	16.805	15.113	5.15652	3.69412	-1.4624	0	0.295	1.08976	-0.431409	4
0000004_19.tif	CX7389	Control	12.596	15.254	5.15652	4.26235	-0.894173	0	0.295	1.25739	-0.263781	4
0000004_19.tif	CX7389	Control	16.894	15.286	5.15652	3.88867	-1.26785	0	0.295	1.14716	-0.374017	4
0000004_19.tif	CX7389	Control	16.482	15.296	5.15652	3.7287	-1.42782	0	0.295	1.09997	-0.421208	4
0000004_19.tif	CX7389	Control	15.259	15.374	5.15652	3.55353	-1.60299	0	0.295	1.04829	-0.472883	4
0000004_19.tif	CX7389	Control	14.33	15.566	5.15652	3.8265	-1.33002	0	0.295	1.12882	-0.392357	4
0000004_19.tif	CX7389	Control	11.956	15.594	5.15652	4.92575	-0.230771	0	0.295	1.4531	-0.0680775	4
0000004_19.tif	CX7389	Control	15.631	15.675	5.15652	3.88509	-1.27143	0	0.295	1.1461	-0.375071	4
0000004_19.tif	CX7389	Control	15.874	15.713	5.15652	3.96145	-1.19507	0	0.295	1.16863	-0.352545	4
0000004_19.tif	CX7389	Control	13.005	15.875	5.15652	4.57308	-0.583435	0	0.295	1.34906	-0.172113	4
0000004_19.tif	CX7389	Control	13.849	15.913	5.15652	4.28442	-0.872097	0	0.295	1.2639	-0.257269	4
0000004_19.tif	CX7389	Control	13.138	15.939	5.15652	4.57052	-0.586003	0	0.295	1.3483	-0.172871	4
0000004_19.tif	CX7389	Control	13.599	16.293	5.15652	4.7233	-0.433219	0	0.295	1.39337	-0.127799	4
0000004_19.tif	CX7389	Control	12.929	16.391	5.15652	5.06844	-0.0880843	0	0.295	1.49519	-0.0259849	4
0000004_19.tif	CX7389	Control	13.446	16.538	5.15652	5.00502	-0.151496	0	0.295	1.47648	-0.0446913	4
0000004_19.tif	CX7389	Control	13.366	16.629	5.15652	5.11778	-0.0387356	0	0.295	1.50975	-0.011427	4
0000004_19.tif	CX7389	Control	11.462	16.839	5.15652	6.2111	1.05459	1	0.295	1.83228	0.311103	4
0000004_19.tif	CX7389	Control	18.582	18.461	5.15652	7.48424	2.32772	1	0.295	2.20785	0.686678	4
0000004_19.tif	CX7389	Control	18.398	18.634	5.15652	7.5566	2.40008	1	0.295	2.2292	0.708025	4
0000026_19.tif	CX7389	Control	13.036	2.597	4.48444	7.93357	3.44914	1	0.295	2.3404	1.0175	4
0000026_19.tif	CX7389	Control	14.052	3.31	4.48444	7.10296	2.61852	1	0.295	2.09537	0.772464	4
0000026_19.tif	CX7389	Control	17.81	3.589	4.48444	7.5894	3.10497	1	0.295	2.23887	0.915965	4
0000026_19.tif	CX7389	Control	12.635	6.617	4.48444	4.20284	-0.281594	0	0.295	1.23984	-0.0830702	4
0000026_19.tif	CX7389	Control	14.847	6.709	4.48444	3.71181	-0.772625	0	0.295	1.09498	-0.227924	4
0000026_19.tif	CX7389	Control	12.434	6.73	4.48444	4.19489	-0.289543	0	0.295	1.23749	-0.0854152	4
0000026_19.tif	CX7389	Control	15.085	7.133	4.48444	3.32648	-1.15796	0	0.295	0.981311	-0.341598	4
0000026_19.tif	CX7389	Control	16.308	7.223	4.48444	3.67424	-0.8102	0	0.295	1.0839	-0.239009	4
0000026_19.tif	CX7389	Control	15.071	7.351	4.48444	3.10981	-1.37462	0	0.295	0.917395	-0.405514	4
0000026_19.tif	CX7389	Control	16.873	7.509	4.48444	3.7639	-0.720538	0	0.295	1.11035	-0.212559	4
0000026_19.tif	CX7389	Control	12.38	7.52	4.48444	3.55573	-0.928708	0	0.295	1.04894	-0.273969	4
0000026_19.tif	CX7389	Control	15.976	7.582	4.48444	3.19889	-1.28555	0	0.295	0.943673	-0.379236	4
0000026_19.tif	CX7389	Control	15.406	7.704	4.48444	2.85678	-1.62766	0	0.295	0.842749	-0.48016	4
0000026_19.tif	CX7389	Control	16.718	7.885	4.48444	3.37798	-1.10645	0	0.295	0.996505	-0.326404	4
0000026_19.tif	CX7389	Control	17.182	7.953	4.48444	3.6579	-0.826538	0	0.295	1.07908	-0.243829	4
0000026_19.tif	CX7389	Control	16.661	7.973	4.48444	3.27445	-1.20999	0	0.295	0.965961	-0.356948	4
0000026_19.tif	CX7389	Control	17.144	8.074	4.48444	3.54927	-0.935166	0	0.295	1.04704	-0.275874	4
0000026_19.tif	CX7389	Control	14.632	8.078	4.48444	2.32907	-2.15537	0	0.295	0.687075	-0.635834	4
0000026_19.tif	CX7389	Control	15.932	8.083	4.48444	2.74375	-1.74069	0	0.295	0.809405	-0.513504	4
0000026_19.tif	CX7389	Control	15.291	8.314	4.48444	2.24488	-2.23956	0	0.295	0.66224	-0.660669	4
0000026_19.tif	CX7389	Control	14.799	8.35	4.48444	2.07818	-2.40626	0	0.295	0.613063	-0.709846	4
0000026_19.tif	CX7389	Control	12.136	8.468	4.48444	3.0259	-1.45854	0	0.295	0.892641	-0.430269	4
0000026_19.tif	CX7389	Control	16.619	8.502	4.48444	2.87232	-1.61212	0	0.295	0.847335	-0.475575	4
0000026_19.tif	CX7389	Control	12.211	8.71	4.48444	2.817	-1.66744	0	0.295	0.831015	-0.491894	4
0000026_19.tif	CX7389	Control	17.485	8.723	4.48444	3.45574	-1.0287	0	0.295	1.01944	-0.303466	4
0000026_19.tif	CX7389	Control	23.195	8.792	4.48444	8.87802	4.39358	1	0.295	2.61902	1.29611	4
0000026_19.tif	CX7389	Control	13.877	9.01	4.48444	1.50978	-2.97465	0	0.295	0.445387	-0.877523	4
0000026_19.tif	CX7389	Control	11.522	9.062	4.48444	3.23238	-1.25206	0	0.295	0.953552	-0.369357	4
0000026_19.tif	CX7389	Control	15.343	9.264	4.48444	1.43715	-3.04728	0	0.295	0.42396	-0.898949	4
0000026_19.tif	CX7389	Control	15.652	9.294	4.48444	1.62382	-2.86062	0	0.295	0.479027	-0.843882	4
0000026_19.tif	CX7389	Control	19.03	9.599	4.48444	4.6359	0.151461	1	0.295	1.36759	0.0446811	4
0000026_19.tif	CX7389	Control	12.49	9.595	4.48444	2.13221	-2.35223	0	0.295	0.629001	-0.693908	4
0000026_19.tif	CX7389	Control	18.442	9.666	4.48444	4.04533	-0.439106	0	0.295	1.19337	-0.129536	4
0000026_19.tif	CX7389	Control	14.397	9.668	4.48444	0.736056	-3.74838	0	0.295	0.217136	-1.10577	4
0000026_19.tif	CX7389	Control	12.557	9.731	4.48444	2.02127	-2.46316	0	0.295	0.596276	-0.726633	4
0000026_19.tif	CX7389	Control	12.132	9.767	4.48444	2.41665	-2.06779	0	0.295	0.712911	-0.609998	4
0000026_19.tif	CX7389	Control	14.87	9.87	4.48444	0.668429	-3.81601	0	0.295	0.197186	-1.12572	4
0000026_19.tif	CX7389	Control	17.764	9.97	4.48444	3.32803	-1.15641	0	0.295	0.981768	-0.341141	4
0000026_19.tif	CX7389	Control	12.013	9.993	4.48444	2.48473	-1.99971	0	0.295	0.732994	-0.589915	4
0000026_19.tif	CX7389	Control	14.886	10.036	4.48444	0.557951	-3.92649	0	0.295	0.164595	-1.15831	4
0000026_19.tif	CX7389	Control	17.474	10.034	4.48444	3.03229	-1.45215	0	0.295	0.894526	-0.428383	4
0000026_19.tif	CX7389	Control	15.144	10.224	4.48444	0.702659	-3.78178	0	0.295	0.207284	-1.11562	4
0000026_19.tif	CX7389	Control	16.695	10.287	4.48444	2.23391	-2.25053	0	0.295	0.659004	-0.663905	4
0000026_19.tif	CX7389	Control	16.58	10.3	4.48444	2.11841	-2.36603	0	0.295	0.624931	-0.697978	4
0000026_19.tif	CX7389	Control	21.854	10.36	4.48444	7.39011	2.90568	1	0.295	2.18008	0.857174	4
0000026_19.tif	CX7389	Control	17.755	10.385	4.48444	3.29104	-1.1934	0	0.295	0.970856	-0.352053	4
0000026_19.tif	CX7389	Control	17.59	10.516	4.48444	3.12811	-1.35632	0	0.295	0.922794	-0.400115	4
0000026_19.tif	CX7389	Control	17.926	10.523	4.48444	3.46415	-1.02029	0	0.295	1.02192	-0.300985	4
0000026_19.tif	CX7389	Control	13.043	10.601	4.48444	1.43501	-3.04943	0	0.295	0.423327	-0.899582	4
0000026_19.tif	CX7389	Control	17.5	10.677	4.48444	3.04852	-1.43592	0	0.295	0.899313	-0.423596	4
0000026_19.tif	CX7389	Control	15.766	10.682	4.48444	1.33198	-3.15246	0	0.295	0.392933	-0.929976	4
0000026_19.tif	CX7389	Control	11.3	10.742	4.48444	3.18232	-1.30212	0	0.295	0.938785	-0.384124	4
0000026_19.tif	CX7389	Control	15.301	10.792	4.48444	0.923824	-3.56061	0	0.295	0.272528	-1.05038	4
0000026_19.tif	CX7389	Control	15.013	10.94	4.48444	0.769365	-3.71507	0	0.295	0.226963	-1.09595	4
0000026_19.tif	CX7389	Control	10.948	10.976	4.48444	3.56271	-0.921731	0	0.295	1.051	-0.271911	4
0000026_19.tif	CX7389	Control	13.041	10.949	4.48444	1.52487	-2.95957	0	0.295	0.449837	-0.873072	4
0000026_19.tif	CX7389	Control	14.776	11.127	4.48444	0.790203	-3.69424	0	0.295	0.23311	-1.0898	4
0000026_19.tif	CX7389	Control	10.319	11.145	4.48444	4.21124	-0.273196	0	0.295	1.24232	-0.0805927	4
0000026_19.tif	CX7389	Control	15.875	11.214	4.48444	1.62846	-2.85598	0	0.295	0.480396	-0.842513	4
0000026_19.tif	CX7389	Control	17.216	11.322	4.48444	2.90202	-1.58241	0	0.295	0.856097	-0.466812	4
0000026_19.tif	CX7389	Control	10.165	11.39	4.48444	4.41129	-0.0731429	0	0.295	1.30133	-0.0215772	4
0000026_19.tif	CX7389	Control	16.277	11.39	4.48444	2.06521	-2.41923	0	0.295	0.609237	-0.713672	4
0000026_19.tif	CX7389	Control	12.243	11.438	4.48444	2.45117	-2.03327	0	0.295	0.723094	-0.599815	4
0000026_19.tif	CX7389	Control	14.242	11.458	4.48444	1.08006	-3.40438	0	0.295	0.318618	-1.00429	4
0000026_19.tif	CX7389	Control	17.357	11.473	4.48444	3.08523	-1.39921	0	0.295	0.910142	-0.412767	4
0000026_19.tif	CX7389	Control	20.242	11.529	4.48444	5.88708	1.40264	1	0.295	1.73669	0.413778	4
0000026_19.tif	CX7389	Control	17.052	11.527	4.48444	2.82234	-1.66209	0	0.295	0.832591	-0.490318	4
0000026_19.tif	CX7389	Control	11.456	11.632	4.48444	3.25014	-1.2343	0	0.295	0.958792	-0.364117	4
0000026_19.tif	CX7389	Control	14.768	11.691	4.48444	1.32534	-3.1591	0	0.295	0.390974	-0.931935	4
0000026_19.tif	CX7389	Control	18.7	11.788	4.48444	4.45729	-0.0271443	0	0.295	1.3149	-0.00800757	4
0000026_19.tif	CX7389	Control	14.944	11.863	4.48444	1.53878	-2.94566	0	0.295	0.45394	-0.868969	4
0000026_19.tif	CX7389	Control	14.754	11.933	4.48444	1.55921	-2.92523	0	0.295	0.459966	-0.862943	4
0000026_19.tif	CX7389	Control	18.375	11.969	4.48444	4.21361	-0.270824	0	0.295	1.24302	-0.0798929	4
0000026_19.tif	CX7389	Control	14.291	11.965	4.48444	1.57354	-2.9109	0	0.295	0.464194	-0.858715	4
0000026_19.tif	CX7389	Control	15.07	12.055	4.48444	1.76152	-2.72292	0	0.295	0.519648	-0.803261	4
0000026_19.tif	CX7389	Control	10.423	12.3	4.48444	4.46496	-0.0194762	0	0.295	1.31716	-0.00574547	4
0000026_19.tif	CX7389	Control	15.857	12.38	4.48444	2.4201	-2.06434	0	0.295	0.71393	-0.608979	4
0000026_19.tif	CX7389	Control	10.681	12.565	4.48444	4.35821	-0.126229	0	0.295	1.28567	-0.0372375	4
0000026_19.tif	CX7389	Control	16.889	12.656	4.48444	3.31144	-1.173	0	0.295	0.976875	-0.346034	4
0000026_19.tif	CX7389	Control	14.065	12.728	4.48444	2.36096	-2.12348	0	0.295	0.696483	-0.626426	4
0000026_19.tif	CX7389	Control	16.977	12.744	4.48444	3.43581	-1.04862	0	0.295	1.01357	-0.309344	4
0000026_19.tif	CX7389	Control	21.333	12.799	4.48444	7.27555	2.79111	1	0.295	2.14629	0.823377	4
0000026_19.tif	CX7389	Control	12.49	12.839	4.48444	3.13696	-1.34748	0	0.295	0.925403	-0.397506	4
0000026_19.tif	CX7389	Control	16.892	12.913	4.48444	3.49361	-0.990825	0	0.295	1.03062	-0.292293	4
0000026_19.tif	CX7389	Control	11.854	12.951	4.48444	3.64892	-0.83552	0	0.295	1.07643	-0.246478	4
0000026_19.tif	CX7389	Control	20.746	12.951	4.48444	6.77982	2.29539	1	0.295	2.00005	0.677139	4
0000026_19.tif	CX7389	Control	14.384	13.025	4.48444	2.62522	-1.85922	0	0.295	0.77444	-0.548469	4
0000026_19.tif	CX7389	Control	16.73	13.126	4.48444	3.54406	-0.940375	0	0.295	1.0455	-0.277411	4
0000026_19.tif	CX7389	Control	15.888	13.2	4.48444	3.14041	-1.34403	0	0.295	0.926421	-0.396488	4
0000026_19.tif	CX7389	Control	13.343	13.233	4.48444	3.04579	-1.43864	0	0.295	0.898509	-0.4244	4
0000026_19.tif	CX7389	Control	14.842	13.47	4.48444	3.09219	-1.39225	0	0.295	0.912196	-0.410713	4
0000026_19.tif	CX7389	Control	12.422	13.512	4.48444	3.7213	-0.763136	0	0.295	1.09778	-0.225125	4
0000026_19.tif	CX7389	Control	15.864	13.539	4.48444	3.43614	-1.0483	0	0.295	1.01366	-0.309248	4
0000026_19.tif	CX7389	Control	15.595	13.528	4.48444	3.32525	-1.15919	0	0.295	0.980949	-0.34196	4
0000026_19.tif	CX7389	Control	13.914	13.586	4.48444	3.23214	-1.2523	0	0.295	0.953481	-0.369428	4
0000026_19.tif	CX7389	Control	14.186	13.603	4.48444	3.21405	-1.27039	0	0.295	0.948143	-0.374766	4
0000026_19.tif	CX7389	Control	12.528	13.697	4.48444	3.82253	-0.661911	0	0.295	1.12765	-0.195264	4
0000026_19.tif	CX7389	Control	17.195	13.715	4.48444	4.29429	-0.190144	0	0.295	1.26682	-0.0560925	4
0000026_19.tif	CX7389	Control	14.33	13.784	4.48444	3.38565	-1.09878	0	0.295	0.998768	-0.324142	4
0000026_19.tif	CX7389	Control	14.408	14.079	4.48444	3.67843	-0.806011	0	0.295	1.08514	-0.237773	4
0000026_19.tif	CX7389	Control	14.628	14.117	4.48444	3.71962	-0.764821	0	0.295	1.09729	-0.225622	4
0000026_19.tif	CX7389	Control	14.34	14.167	4.48444	3.76804	-0.716397	0	0.295	1.11157	-0.211337	4
0000026_19.tif	CX7389	Control	14.693	14.246	4.48444	3.85181	-0.632624	0	0.295	1.13628	-0.186624	4
0000026_19.tif	CX7389	Control	16.226	14.431	4.48444	4.39836	-0.0860808	0	0.295	1.29752	-0.0253938	4
0000026_19.tif	CX7389	Control	17.747	14.569	4.48444	5.30569	0.821249	1	0.295	1.56518	0.242268	4
0000026_19.tif	CX7389	Control	16.023	14.573	4.48444	4.45377	-0.030668	0	0.295	1.31386	-0.00904706	4
0000026_19.tif	CX7389	Control	17.793	14.694	4.48444	5.4325	0.948065	1	0.295	1.60259	0.279679	4
0000026_19.tif	CX7389	Control	18.254	15.709	4.48444	6.52219	2.03775	1	0.295	1.92405	0.601137	4
0000026_19.tif	CX7389	Control	18.222	16.548	4.48444	7.20473	2.72029	1	0.295	2.1254	0.802487	4
0000026_19.tif	CX7389	Control	17.357	16.917	4.48444	7.12936	2.64492	1	0.295	2.10316	0.780251	4
0000026_19.tif	CX7389	Control	17.879	17.48	4.48444	7.85967	3.37524	1	0.295	2.3186	0.995695	4
0000027_16.tif	CX7389	Control	14.49	5.708	3.78138	4.92718	1.1458	1	0.295	1.45352	0.338012	4
0000027_16.tif	CX7389	Control	14.407	7.268	3.78138	3.36725	-0.414126	0	0.295	0.993339	-0.122167	4
0000027_16.tif	CX7389	Control	14.744	7.965	3.78138	2.68636	-1.09502	0	0.295	0.792475	-0.32303	4
0000027_16.tif	CX7389	Control	13.912	7.999	3.78138	2.68994	-1.09143	0	0.295	0.793533	-0.321973	4
0000027_16.tif	CX7389	Control	13.597	8.154	3.78138	2.62289	-1.15848	0	0.295	0.773753	-0.341753	4
0000027_16.tif	CX7389	Control	13.483	8.25	3.78138	2.57283	-1.20855	0	0.295	0.758985	-0.356521	4
0000027_16.tif	CX7389	Control	12.275	8.378	3.78138	3.13305	-0.648329	0	0.295	0.924249	-0.191257	4
0000027_16.tif	CX7389	Control	12.632	8.375	3.78138	2.89922	-0.882159	0	0.295	0.855269	-0.260237	4
0000027_16.tif	CX7389	Control	12.057	8.486	3.78138	3.21482	-0.566553	0	0.295	0.948373	-0.167133	4
0000027_16.tif	CX7389	Control	17.069	8.554	3.78138	3.34667	-0.434705	0	0.295	0.987268	-0.128238	4
0000027_16.tif	CX7389	Control	14.301	8.692	3.78138	1.94855	-1.83282	0	0.295	0.574823	-0.540683	4
0000027_16.tif	CX7389	Control	13.12	8.696	3.78138	2.35017	-1.4312	0	0.295	0.693301	-0.422205	4
0000027_16.tif	CX7389	Control	15.914	8.712	3.78138	2.41807	-1.3633	0	0.295	0.713332	-0.402174	4
0000027_16.tif	CX7389	Control	16.632	8.714	3.78138	2.90862	-0.872751	0	0.295	0.858044	-0.257461	4
0000027_16.tif	CX7389	Control	12.356	8.746	3.78138	2.81865	-0.962726	0	0.295	0.831502	-0.284004	4
0000027_16.tif	CX7389	Control	15.869	8.809	3.78138	2.31377	-1.46761	0	0.295	0.682561	-0.432944	4
0000027_16.tif	CX7389	Control	13.422	8.859	3.78138	2.05106	-1.73031	0	0.295	0.605063	-0.510443	4
0000027_16.tif	CX7389	Control	13.26	8.892	3.78138	2.10936	-1.67202	0	0.295	0.622261	-0.493245	4
0000027_16.tif	CX7389	Control	7.952	8.967	3.78138	6.70673	2.92536	1	0.295	1.97849	0.86298	4
0000027_16.tif	CX7389	Control	14.811	9.049	3.78138	1.62701	-2.15436	0	0.295	0.479968	-0.635537	4
0000027_16.tif	CX7389	Control	13.077	9.089	3.78138	2.06634	-1.71504	0	0.295	0.60957	-0.505936	4
0000027_16.tif	CX7389	Control	11.532	9.165	3.78138	3.26557	-0.515804	0	0.295	0.963344	-0.152162	4
0000027_16.tif	CX7389	Control	15.11	9.221	3.78138	1.56129	-2.22008	0	0.295	0.460582	-0.654924	4
0000027_16.tif	CX7389	Control	13.324	9.274	3.78138	1.76513	-2.01624	0	0.295	0.520714	-0.594791	4
0000027_16.tif	CX7389	Control	16.435	9.256	3.78138	2.41864	-1.36274	0	0.295	0.713498	-0.402007	4
0000027_16.tif	CX7389	Control	16.248	9.396	3.78138	2.18521	-1.59617	0	0.295	0.644635	-0.47087	4
0000027_16.tif	CX7389	Control	12.526	9.571	3.78138	2.19686	-1.58452	0	0.295	0.648073	-0.467433	4
0000027_16.tif	CX7389	Control	16.12	10.001	3.78138	1.78817	-1.99321	0	0.295	0.527509	-0.587997	4
0000027_16.tif	CX7389	Control	11.899	10.024	3.78138	2.62121	-1.16017	0	0.295	0.773256	-0.34225	4
0000027_16.tif	CX7389	Control	24.354	10.052	3.78138	9.92314	6.14177	1	0.295	2.92733	1.81182	4
0000027_16.tif	CX7389	Control	11.719	10.176	3.78138	2.76733	-1.01404	0	0.295	0.816363	-0.299143	4
0000027_16.tif	CX7389	Control	9.633	10.385	3.78138	4.82149	1.04011	1	0.295	1.42234	0.306833	4
0000027_16.tif	CX7389	Control	12.495	10.447	3.78138	1.96203	-1.81935	0	0.295	0.578798	-0.536707	4
0000027_16.tif	CX7389	Control	8.521	10.459	3.78138	5.92961	2.14824	1	0.295	1.74924	0.63373	4
0000027_16.tif	CX7389	Control	12.198	10.54	3.78138	2.252	-1.52937	0	0.295	0.664341	-0.451164	4
0000027_16.tif	CX7389	Control	12.332	10.663	3.78138	2.11619	-1.66519	0	0.295	0.624275	-0.491231	4
0000027_16.tif	CX7389	Control	12.139	10.758	3.78138	2.31227	-1.4691	0	0.295	0.682121	-0.433385	4
0000027_16.tif	CX7389	Control	17.366	10.753	3.78138	2.92038	-0.86099	0	0.295	0.861514	-0.253992	4
0000027_16.tif	CX7389	Control	12.113	11.018	3.78138	2.3662	-1.41517	0	0.295	0.69803	-0.417476	4
0000027_16.tif	CX7389	Control	12.734	11.042	3.78138	1.76166	-2.01972	0	0.295	0.51969	-0.595816	4
0000027_16.tif	CX7389	Control	14.834	11.129	3.78138	0.626923	-3.15445	0	0.295	0.184942	-0.930564	4
0000027_16.tif	CX7389	Control	11.117	11.297	3.78138	3.39615	-0.38523	0	0.295	1.00186	-0.113643	4
0000027_16.tif	CX7389	Control	13.266	11.342	3.78138	1.37731	-2.40407	0	0.295	0.406305	-0.7092	4
0000027_16.tif	CX7389	Control	15.185	11.311	3.78138	1.00007	-2.7813	0	0.295	0.295021	-0.820484	4
0000027_16.tif	CX7389	Control	15.002	11.334	3.78138	0.891918	-2.88946	0	0.295	0.263116	-0.85239	4
0000027_16.tif	CX7389	Control	17.385	11.432	3.78138	3.04322	-0.738157	0	0.295	0.897749	-0.217756	4
0000027_16.tif	CX7389	Control	12.166	11.498	3.78138	2.43973	-1.34164	0	0.295	0.719721	-0.395785	4
0000027_16.tif	CX7389	Control	14.259	11.514	3.78138	0.89909	-2.88229	0	0.295	0.265231	-0.850274	4
0000027_16.tif	CX7389	Control	14.266	11.65	3.78138	1.03119	-2.75019	0	0.295	0.304201	-0.811305	4
0000027_16.tif	CX7389	Control	13.623	11.762	3.78138	1.39669	-2.38468	0	0.295	0.412025	-0.703481	4
0000027_16.tif	CX7389	Control	23.073	11.766	3.78138	8.69884	4.91746	1	0.295	2.56616	1.45065	4
0000027_16.tif	CX7389	Control	14.057	11.889	3.78138	1.31354	-2.46783	0	0.295	0.387495	-0.72801	4
0000027_16.tif	CX7389	Control	15.065	11.943	3.78138	1.44622	-2.33515	0	0.295	0.426635	-0.688871	4
0000027_16.tif	CX7389	Control	12.334	12.013	3.78138	2.52347	-1.25791	0	0.295	0.744422	-0.371083	4
0000027_16.tif	CX7389	Control	12.071	12.076	3.78138	2.77968	-1.0017	0	0.295	0.820005	-0.295501	4
0000027_16.tif	CX7389	Control	16.323	12.309	3.78138	2.51354	-1.26783	0	0.295	0.741495	-0.37401	4
0000027_16.tif	CX7389	Control	12.332	12.359	3.78138	2.7294	-1.05197	0	0.295	0.805173	-0.310332	4
0000027_16.tif	CX7389	Control	12.609	12.495	3.78138	2.61563	-1.16575	0	0.295	0.771611	-0.343895	4
0000027_16.tif	CX7389	Control	11.808	12.756	3.78138	3.38648	-0.394896	0	0.295	0.999011	-0.116494	4
0000027_16.tif	CX7389	Control	13.711	12.748	3.78138	2.23784	-1.54353	0	0.295	0.660163	-0.455342	4
0000027_16.tif	CX7389	Control	13.869	12.802	3.78138	2.24302	-1.53836	0	0.295	0.66169	-0.453815	4
0000027_16.tif	CX7389	Control	12.954	12.852	3.78138	2.67341	-1.10796	0	0.295	0.788656	-0.32685	4
0000027_16.tif	CX7389	Control	13.776	13.002	3.78138	2.46054	-1.32083	0	0.295	0.72586	-0.389645	4
0000027_16.tif	CX7389	Control	14.873	13.003	3.78138	2.40584	-1.37554	0	0.295	0.709722	-0.405784	4
0000027_16.tif	CX7389	Control	15.262	13.095	3.78138	2.59118	-1.1902	0	0.295	0.764397	-0.351109	4
0000027_16.tif	CX7389	Control	13.988	13.125	3.78138	2.53213	-1.24924	0	0.295	0.746979	-0.368526	4
0000027_16.tif	CX7389	Control	7.894	13.213	3.78138	7.0428	3.26142	1	0.295	2.07763	0.96212	4
0000027_16.tif	CX7389	Control	22.738	13.238	3.78138	8.68906	4.90768	1	0.295	2.56327	1.44777	4
0000027_16.tif	CX7389	Control	13.349	13.263	3.78138	2.84854	-0.932834	0	0.295	0.84032	-0.275186	4
0000027_16.tif	CX7389	Control	22.509	13.307	3.78138	8.49231	4.71093	1	0.295	2.50523	1.38973	4
0000027_16.tif	CX7389	Control	7.773	13.41	3.78138	7.22885	3.44747	1	0.295	2.13251	1.017	4
0000027_16.tif	CX7389	Control	14.828	13.595	3.78138	2.98429	-0.797083	0	0.295	0.880366	-0.235139	4
0000027_16.tif	CX7389	Control	13.486	13.829	3.78138	3.33573	-0.445647	0	0.295	0.98404	-0.131466	4
0000027_16.tif	CX7389	Control	8.295	14.054	3.78138	7.0391	3.25773	1	0.295	2.07654	0.96103	4
0000027_16.tif	CX7389	Control	14.877	14.205	3.78138	3.59568	-0.185692	0	0.295	1.06073	-0.054779	4
0000027_16.tif	CX7389	Control	10.216	14.445	3.78138	5.69438	1.913	1	0.295	1.67984	0.564335	4
0000027_16.tif	CX7389	Control	14.023	14.538	3.78138	3.92607	0.144696	1	0.295	1.15819	0.0426853	4
0000027_16.tif	CX7389	Control	17.689	14.61	3.78138	5.12881	1.34744	1	0.295	1.513	0.397494	4
0000027_16.tif	CX7389	Control	15.373	16.387	3.78138	5.8259	2.04453	1	0.295	1.71864	0.603135	4
0000027_16.tif	CX7389	Control	7.327	16.583	3.78138	9.27833	5.49695	1	0.295	2.73711	1.6216	4
0000027_16.tif	CX7389	Control	14.499	16.803	3.78138	6.16821	2.38684	1	0.295	1.81962	0.704117	4
0000027_16.tif	CX7389	Control	5.608	17.126	3.78138	10.9672	7.18579	1	0.295	3.23531	2.11981	4
0000026_16.tif	CX7389	Control	13.47	8.542	4.21371	3.5673	-0.64641	0	0.295	1.05235	-0.190691	4
0000026_16.tif	CX7389	Control	14.062	8.682	4.21371	3.47022	-0.743484	0	0.295	1.02372	-0.219328	4
0000026_16.tif	CX7389	Control	13.755	8.967	4.21371	3.15108	-1.06263	0	0.295	0.929568	-0.313476	4
0000026_16.tif	CX7389	Control	12.419	9.176	4.21371	3.13144	-1.08227	0	0.295	0.923774	-0.31927	4
0000026_16.tif	CX7389	Control	13.851	9.193	4.21371	2.93518	-1.27853	0	0.295	0.865878	-0.377165	4
0000026_16.tif	CX7389	Control	16.245	9.516	4.21371	3.76445	-0.449256	0	0.295	1.11051	-0.132531	4
0000026_16.tif	CX7389	Control	12.714	9.603	4.21371	2.63121	-1.5825	0	0.295	0.776205	-0.466838	4
0000026_16.tif	CX7389	Control	11.928	9.722	4.21371	2.86697	-1.34674	0	0.295	0.845756	-0.397288	4
0000026_16.tif	CX7389	Control	15.273	10.01	4.21371	2.73731	-1.4764	0	0.295	0.807506	-0.435538	4
0000026_16.tif	CX7389	Control	14.83	10.041	4.21371	2.45015	-1.76356	0	0.295	0.722793	-0.52025	4
0000026_16.tif	CX7389	Control	12.424	10.521	4.21371	1.92723	-2.28648	0	0.295	0.568532	-0.674511	4
0000026_16.tif	CX7389	Control	14.288	10.876	4.21371	1.45474	-2.75897	0	0.295	0.429149	-0.813895	4
0000026_16.tif	CX7389	Control	12.563	10.96	4.21371	1.49279	-2.72092	0	0.295	0.440372	-0.802672	4
0000026_16.tif	CX7389	Control	16.871	11.006	4.21371	3.53166	-0.682045	0	0.295	1.04184	-0.201203	4
0000026_16.tif	CX7389	Control	14.593	11.024	4.21371	1.52878	-2.68493	0	0.295	0.450989	-0.792055	4
0000026_16.tif	CX7389	Control	11.049	11.391	4.21371	2.56936	-1.64435	0	0.295	0.757961	-0.485082	4
0000026_16.tif	CX7389	Control	15.752	11.488	4.21371	2.32063	-1.89307	0	0.295	0.684587	-0.558457	4
0000026_16.tif	CX7389	Control	10.668	11.599	4.21371	2.8933	-1.3204	0	0.295	0.853524	-0.389519	4
0000026_16.tif	CX7389	Control	11.565	12.099	4.21371	1.95103	-2.26268	0	0.295	0.575553	-0.667491	4
0000026_16.tif	CX7389	Control	17.029	12.085	4.21371	3.51308	-0.700625	0	0.295	1.03636	-0.206684	4
0000026_16.tif	CX7389	Control	10.688	12.151	4.21371	2.82831	-1.38539	0	0.295	0.834352	-0.408692	4
0000026_16.tif	CX7389	Control	10.383	12.217	4.21371	3.13486	-1.07885	0	0.295	0.924784	-0.31826	4
0000026_16.tif	CX7389	Control	11.749	12.39	4.21371	1.7892	-2.4245	0	0.295	0.527815	-0.715228	4
0000026_16.tif	CX7389	Control	10.782	12.523	4.21371	2.76517	-1.44854	0	0.295	0.815724	-0.427319	4
0000026_16.tif	CX7389	Control	10.939	12.579	4.21371	2.61951	-1.5942	0	0.295	0.772755	-0.470288	4
0000026_16.tif	CX7389	Control	10.421	12.621	4.21371	3.13706	-1.07664	0	0.295	0.925434	-0.31761	4
0000026_16.tif	CX7389	Control	11.324	12.622	4.21371	2.25123	-1.96248	0	0.295	0.664113	-0.578931	4
0000026_16.tif	CX7389	Control	15.689	12.775	4.21371	2.27277	-1.94094	0	0.295	0.670467	-0.572576	4
0000026_16.tif	CX7389	Control	11.726	12.856	4.21371	1.93962	-2.27409	0	0.295	0.572187	-0.670857	4
0000026_16.tif	CX7389	Control	10.969	12.863	4.21371	2.65626	-1.55745	0	0.295	0.783597	-0.459446	4
0000026_16.tif	CX7389	Control	10.46	12.9	4.21371	3.15671	-1.057	0	0.295	0.931229	-0.311814	4
0000026_16.tif	CX7389	Control	9.719	12.917	4.21371	3.88202	-0.331688	0	0.295	1.1452	-0.0978479	4
0000026_16.tif	CX7389	Control	10.731	12.92	4.21371	2.90068	-1.31303	0	0.295	0.855701	-0.387343	4
0000026_16.tif	CX7389	Control	11.176	13.192	4.21371	2.57847	-1.63524	0	0.295	0.760648	-0.482396	4
0000026_16.tif	CX7389	Control	10.776	13.326	4.21371	2.99811	-1.21559	0	0.295	0.884444	-0.3586	4
0000026_16.tif	CX7389	Control	10.768	13.49	4.21371	3.07549	-1.13821	0	0.295	0.907271	-0.335773	4
0000026_16.tif	CX7389	Control	11.777	13.587	4.21371	2.28224	-1.93147	0	0.295	0.67326	-0.569784	4
0000026_16.tif	CX7389	Control	15.143	13.669	4.21371	2.25405	-1.95966	0	0.295	0.664944	-0.5781	4
0000026_16.tif	CX7389	Control	10.941	13.855	4.21371	3.11113	-1.10258	0	0.295	0.917784	-0.32526	4
0000026_16.tif	CX7389	Control	13.64	13.873	4.21371	1.76835	-2.44535	0	0.295	0.521664	-0.721379	4
0000026_16.tif	CX7389	Control	15.344	13.908	4.21371	2.56476	-1.64895	0	0.295	0.756604	-0.48644	4
0000026_16.tif	CX7389	Control	11.401	14.047	4.21371	2.86864	-1.34507	0	0.295	0.846247	-0.396796	4
0000026_16.tif	CX7389	Control	12.085	14.121	4.21371	2.46899	-1.74472	0	0.295	0.728352	-0.514692	4
0000026_16.tif	CX7389	Control	15.363	14.131	4.21371	2.73859	-1.47511	0	0.295	0.807885	-0.435159	4
0000026_16.tif	CX7389	Control	11.153	14.146	4.21371	3.1198	-1.09391	0	0.295	0.92034	-0.322703	4
0000026_16.tif	CX7389	Control	14.066	14.184	4.21371	2.14665	-2.06705	0	0.295	0.633263	-0.60978	4
0000026_16.tif	CX7389	Control	11.466	14.364	4.21371	3.04754	-1.16616	0	0.295	0.899026	-0.344018	4
0000026_16.tif	CX7389	Control	15.188	14.39	4.21371	2.82817	-1.38554	0	0.295	0.83431	-0.408733	4
0000026_16.tif	CX7389	Control	11.971	14.472	4.21371	2.82326	-1.39045	0	0.295	0.832862	-0.410182	4
0000026_16.tif	CX7389	Control	14.052	14.536	4.21371	2.48548	-1.72822	0	0.295	0.733217	-0.509826	4
0000026_16.tif	CX7389	Control	9.169	14.578	4.21371	4.99924	0.78553	1	0.295	1.47477	0.231731	4
0000026_16.tif	CX7389	Control	15.63	14.583	4.21371	3.25418	-0.959529	0	0.295	0.959982	-0.283061	4
0000026_16.tif	CX7389	Control	8.911	14.65	4.21371	5.25953	1.04583	1	0.295	1.55156	0.308519	4
0000026_16.tif	CX7389	Control	12.602	14.637	4.21371	2.68816	-1.52555	0	0.295	0.793006	-0.450038	4
0000026_16.tif	CX7389	Control	12.825	14.825	4.21371	2.80252	-1.41118	0	0.295	0.826744	-0.416299	4
0000026_16.tif	CX7389	Control	12.218	15.073	4.21371	3.23575	-0.977953	0	0.295	0.954547	-0.288496	4
0000026_16.tif	CX7389	Control	12.666	15.135	4.21371	3.14312	-1.07059	0	0.295	0.927219	-0.315824	4
0000026_16.tif	CX7389	Control	12.619	15.226	4.21371	3.2435	-0.970206	0	0.295	0.956833	-0.286211	4
0000026_16.tif	CX7389	Control	10.685	15.287	4.21371	4.25608	0.0423764	1	0.295	1.25554	0.012501	4
0000026_16.tif	CX7389	Control	10.521	15.322	4.21371	4.39242	0.178718	1	0.295	1.29577	0.0527217	4
0000026_16.tif	CX7389	Control	14.47	15.359	4.21371	3.38713	-0.826582	0	0.295	0.999202	-0.243842	4
0000026_16.tif	CX7389	Control	10.468	15.458	4.21371	4.52837	0.31466	1	0.295	1.33587	0.0928247	4
0000026_16.tif	CX7389	Control	16.769	17.868	4.21371	6.61423	2.40053	1	0.295	1.9512	0.708155	4
0000026_16.tif	CX7389	Control	15.308	18.8	4.21371	6.92681	2.71311	1	0.295	2.04341	0.800366	4
0000026_16.tif	CX7389	Control	15.247	18.964	4.21371	7.07018	2.85647	1	0.295	2.0857	0.842658	4
0000003_13.tif	CX7389	Control	19.589	5.392	4.17462	9.22089	5.04627	1	0.295	2.72016	1.48865	4
0000003_13.tif	CX7389	Control	21.569	6.826	4.17462	9.71328	5.53865	1	0.295	2.86542	1.6339	4
0000003_13.tif	CX7389	Control	17.62	8.726	4.17462	5.44163	1.26701	1	0.295	1.60528	0.373769	4
0000003_13.tif	CX7389	Control	15.268	9.264	4.17462	3.56671	-0.607914	0	0.295	1.05218	-0.179335	4
0000003_13.tif	CX7389	Control	14.913	9.425	4.17462	3.2705	-0.904124	0	0.295	0.964797	-0.266717	4
0000003_13.tif	CX7389	Control	14.022	9.63	4.17462	2.83373	-1.34089	0	0.295	0.83595	-0.395563	4
0000003_13.tif	CX7389	Control	13.709	9.66	4.17462	2.77883	-1.39579	0	0.295	0.819755	-0.411758	4
0000003_13.tif	CX7389	Control	11.762	9.726	4.17462	3.29933	-0.875291	0	0.295	0.973303	-0.258211	4
0000003_13.tif	CX7389	Control	13.375	9.778	4.17462	2.67327	-1.50135	0	0.295	0.788614	-0.4429	4
0000003_13.tif	CX7389	Control	12.565	9.961	4.17462	2.70061	-1.47401	0	0.295	0.796681	-0.434833	4
0000003_13.tif	CX7389	Control	13.117	10.021	4.17462	2.47315	-1.70147	0	0.295	0.729579	-0.501935	4
0000003_13.tif	CX7389	Control	13.373	10.12	4.17462	2.33344	-1.84118	0	0.295	0.688365	-0.543148	4
0000003_13.tif	CX7389	Control	14.307	10.132	4.17462	2.40025	-1.77437	0	0.295	0.708073	-0.52344	4
0000003_13.tif	CX7389	Control	11.906	10.188	4.17462	2.84125	-1.33337	0	0.295	0.83817	-0.393343	4
0000003_13.tif	CX7389	Control	13.822	10.174	4.17462	2.27122	-1.9034	0	0.295	0.670011	-0.561502	4
0000003_13.tif	CX7389	Control	14.566	10.306	4.17462	2.32402	-1.85061	0	0.295	0.685585	-0.545929	4
0000003_13.tif	CX7389	Control	14.276	10.391	4.17462	2.14323	-2.03139	0	0.295	0.632253	-0.599261	4
0000003_13.tif	CX7389	Control	15.012	10.415	4.17462	2.4438	-1.73082	0	0.295	0.720922	-0.510592	4
0000003_13.tif	CX7389	Control	9.02	10.427	4.17462	5.03962	0.864998	1	0.295	1.48669	0.255174	4
0000003_13.tif	CX7389	Control	11.146	10.42	4.17462	3.20895	-0.965673	0	0.295	0.94664	-0.284874	4
0000003_13.tif	CX7389	Control	15.286	10.54	4.17462	2.51166	-1.66296	0	0.295	0.740939	-0.490574	4
0000003_13.tif	CX7389	Control	15.649	10.675	4.17462	2.67212	-1.5025	0	0.295	0.788276	-0.443238	4
0000003_13.tif	CX7389	Control	11.159	10.852	4.17462	2.94546	-1.22916	0	0.295	0.86891	-0.362603	4
0000003_13.tif	CX7389	Control	17.134	10.896	4.17462	3.81822	-0.356401	0	0.295	1.12638	-0.105138	4
0000003_13.tif	CX7389	Control	10.806	11.515	4.17462	2.98147	-1.19315	0	0.295	0.879533	-0.35198	4
0000003_13.tif	CX7389	Control	15.953	11.816	4.17462	2.39421	-1.78041	0	0.295	0.706291	-0.525222	4
0000003_13.tif	CX7389	Control	12.159	11.84	4.17462	1.5981	-2.57652	0	0.295	0.47144	-0.760073	4
0000003_13.tif	CX7389	Control	11.351	12.045	4.17462	2.32348	-1.85114	0	0.295	0.685426	-0.546087	4
0000003_13.tif	CX7389	Control	21.787	12.065	4.17462	8.15454	3.97991	1	0.295	2.40559	1.17407	4
0000003_13.tif	CX7389	Control	12.076	12.158	4.17462	1.58985	-2.58477	0	0.295	0.469006	-0.762507	4
0000003_13.tif	CX7389	Control	16.714	12.262	4.17462	3.07804	-1.09659	0	0.295	0.908021	-0.323493	4
0000003_13.tif	CX7389	Control	12.731	12.281	4.17462	0.923444	-3.25118	0	0.295	0.272416	-0.959097	4
0000003_13.tif	CX7389	Control	12.223	12.454	4.17462	1.41809	-2.75653	0	0.295	0.418337	-0.813177	4
0000003_13.tif	CX7389	Control	12.436	12.461	4.17462	1.20522	-2.9694	0	0.295	0.35554	-0.875974	4
0000003_13.tif	CX7389	Control	5.317	12.548	4.17462	8.32473	4.15011	1	0.295	2.45579	1.22428	4
0000003_13.tif	CX7389	Control	15.299	12.665	4.17462	1.67347	-2.50115	0	0.295	0.493673	-0.737841	4
0000003_13.tif	CX7389	Control	15.106	13.108	4.17462	1.61094	-2.56368	0	0.295	0.475227	-0.756286	4
0000003_13.tif	CX7389	Control	15.405	13.447	4.17462	2.03219	-2.14244	0	0.295	0.599495	-0.632019	4
0000003_13.tif	CX7389	Control	15.965	13.567	4.17462	2.58372	-1.5909	0	0.295	0.762198	-0.469316	4
0000003_13.tif	CX7389	Control	16.127	13.617	4.17462	2.75141	-1.42322	0	0.295	0.811665	-0.419849	4
0000003_13.tif	CX7389	Control	16.769	13.729	4.17462	3.38394	-0.790679	0	0.295	0.998263	-0.23325	4
0000003_13.tif	CX7389	Control	15.786	13.81	4.17462	2.54625	-1.62837	0	0.295	0.751145	-0.480368	4
0000003_13.tif	CX7389	Control	17.667	13.919	4.17462	4.28976	0.115138	1	0.295	1.26548	0.0339657	4
0000003_13.tif	CX7389	Control	13.145	13.982	4.17462	1.62171	-2.55291	0	0.295	0.478405	-0.753108	4
0000003_13.tif	CX7389	Control	15.637	14.558	4.17462	2.91177	-1.26285	0	0.295	0.858973	-0.372541	4
0000003_13.tif	CX7389	Control	15.37	14.558	4.17462	2.73566	-1.43896	0	0.295	0.80702	-0.424493	4
0000003_13.tif	CX7389	Control	14.139	14.569	4.17462	2.18842	-1.98621	0	0.295	0.645583	-0.585931	4
0000003_13.tif	CX7389	Control	7.617	14.932	4.17462	6.51986	2.34524	1	0.295	1.92336	0.691846	4
0000003_13.tif	CX7389	Control	14.24	15.074	4.17462	2.7032	-1.47142	0	0.295	0.797444	-0.434069	4
0000003_13.tif	CX7389	Control	13.871	15.141	4.17462	2.71277	-1.46185	0	0.295	0.800266	-0.431247	4
0000003_13.tif	CX7389	Control	13.166	15.381	4.17462	2.98109	-1.19354	0	0.295	0.87942	-0.352093	4
0000003_13.tif	CX7389	Control	13.223	15.444	4.17462	3.03492	-1.1397	0	0.295	0.895302	-0.336211	4
0000003_13.tif	CX7389	Control	14.033	15.443	4.17462	3.03046	-1.14416	0	0.295	0.893986	-0.337528	4
0000003_13.tif	CX7389	Control	13.873	15.491	4.17462	3.0618	-1.11282	0	0.295	0.903232	-0.328282	4
0000003_13.tif	CX7389	Control	13.541	15.625	4.17462	3.18857	-0.986053	0	0.295	0.940628	-0.290886	4
0000003_13.tif	CX7389	Control	14.948	15.608	4.17462	3.42887	-0.745752	0	0.295	1.01152	-0.219997	4
0000003_13.tif	CX7389	Control	21.802	15.733	4.17462	8.80108	4.62645	1	0.295	2.59632	1.3648	4
0000003_13.tif	CX7389	Control	14.738	15.834	4.17462	3.56878	-0.605837	0	0.295	1.05279	-0.178722	4
0000003_13.tif	CX7389	Control	10.816	16.636	4.17462	5.06002	0.885401	1	0.295	1.49271	0.261193	4
0000003_13.tif	CX7389	Control	10.872	16.729	4.17462	5.10686	0.932241	1	0.295	1.50652	0.275011	4
0000003_13.tif	CX7389	Control	10.674	16.759	4.17462	5.24158	1.06696	1	0.295	1.54627	0.314752	4
0000004_16.tif	CX7389	Control	19.358	6.132	5.14583	7.45524	2.30941	1	0.295	2.1993	0.681276	4
0000004_16.tif	CX7389	Control	19.452	6.177	5.14583	7.49722	2.35139	1	0.295	2.21168	0.69366	4
0000004_16.tif	CX7389	Control	14.041	6.497	5.14583	4.53939	-0.606437	0	0.295	1.33912	-0.178899	4
0000004_16.tif	CX7389	Control	12.423	6.637	5.14583	4.58062	-0.565214	0	0.295	1.35128	-0.166738	4
0000004_16.tif	CX7389	Control	19.295	6.704	5.14583	7.04304	1.89721	1	0.295	2.0777	0.559677	4
0000004_16.tif	CX7389	Control	12.234	7.012	5.14583	4.28511	-0.860716	0	0.295	1.26411	-0.253911	4
0000004_16.tif	CX7389	Control	10.734	7.141	5.14583	4.90849	-0.237345	0	0.295	1.448	-0.0700167	4
0000004_16.tif	CX7389	Control	16.307	7.992	5.14583	3.97813	-1.1677	0	0.295	1.17355	-0.344473	4
0000004_16.tif	CX7389	Control	15.689	8.121	5.14583	3.50158	-1.64425	0	0.295	1.03297	-0.485054	4
0000004_16.tif	CX7389	Control	15.526	8.173	5.14583	3.36911	-1.77672	0	0.295	0.993886	-0.524134	4
0000004_16.tif	CX7389	Control	17.93	8.207	5.14583	5.05502	-0.0908146	0	0.295	1.49123	-0.0267903	4
0000004_16.tif	CX7389	Control	16.043	8.24	5.14583	3.61846	-1.52737	0	0.295	1.06745	-0.450573	4
0000004_16.tif	CX7389	Control	16.887	8.292	5.14583	4.17327	-0.972562	0	0.295	1.23111	-0.286906	4
0000004_16.tif	CX7389	Control	16.52	8.527	5.14583	3.74257	-1.40326	0	0.295	1.10406	-0.413963	4
0000004_16.tif	CX7389	Control	10.495	8.593	5.14583	4.051	-1.09483	0	0.295	1.19505	-0.322974	4
0000004_16.tif	CX7389	Control	10.692	8.619	5.14583	3.8791	-1.26673	0	0.295	1.14433	-0.373685	4
0000004_16.tif	CX7389	Control	15.76	8.642	5.14583	3.1286	-2.01723	0	0.295	0.922937	-0.595083	4
0000004_16.tif	CX7389	Control	13.322	8.688	5.14583	2.37402	-2.77181	0	0.295	0.700337	-0.817683	4
0000004_16.tif	CX7389	Control	12.896	8.703	5.14583	2.46953	-2.6763	0	0.295	0.728511	-0.789509	4
0000004_16.tif	CX7389	Control	14.084	8.728	5.14583	2.3245	-2.82133	0	0.295	0.685728	-0.832292	4
0000004_16.tif	CX7389	Control	16.401	8.955	5.14583	3.37667	-1.76916	0	0.295	0.996119	-0.521901	4
0000004_16.tif	CX7389	Control	14.064	8.987	5.14583	2.06553	-3.0803	0	0.295	0.609332	-0.908688	4
0000004_16.tif	CX7389	Control	13.208	9.02	5.14583	2.07382	-3.07201	0	0.295	0.611776	-0.906244	4
0000004_16.tif	CX7389	Control	14.143	9.084	5.14583	1.9846	-3.16123	0	0.295	0.585458	-0.932562	4
0000004_16.tif	CX7389	Control	13.168	9.087	5.14583	2.01992	-3.12591	0	0.295	0.595876	-0.922143	4
0000004_16.tif	CX7389	Control	12.891	9.252	5.14583	1.96411	-3.18172	0	0.295	0.579412	-0.938608	4
0000004_16.tif	CX7389	Control	12.774	9.512	5.14583	1.79271	-3.35312	0	0.295	0.528848	-0.989171	4
0000004_16.tif	CX7389	Control	11.742	9.559	5.14583	2.47389	-2.67194	0	0.295	0.729799	-0.788221	4
0000004_16.tif	CX7389	Control	11.9	9.57	5.14583	2.34169	-2.80414	0	0.295	0.690797	-0.827222	4
0000004_16.tif	CX7389	Control	10.631	10.318	5.14583	3.18275	-1.96308	0	0.295	0.93891	-0.57911	4
0000004_16.tif	CX7389	Control	10.857	10.337	5.14583	2.95835	-2.18748	0	0.295	0.872714	-0.645306	4
0000004_16.tif	CX7389	Control	14.367	10.342	5.14583	0.931958	-4.21387	0	0.295	0.274927	-1.24309	4
0000004_16.tif	CX7389	Control	14.854	10.601	5.14583	1.19793	-3.9479	0	0.295	0.353388	-1.16463	4
0000004_16.tif	CX7389	Control	16.842	10.654	5.14583	3.13018	-2.01565	0	0.295	0.923404	-0.594616	4
0000004_16.tif	CX7389	Control	14.331	10.916	5.14583	0.607049	-4.53878	0	0.295	0.17908	-1.33894	4
0000004_16.tif	CX7389	Control	11.136	11.074	5.14583	2.59844	-2.54739	0	0.295	0.766541	-0.751479	4
0000004_16.tif	CX7389	Control	10.811	11.311	5.14583	2.93686	-2.20897	0	0.295	0.866374	-0.651646	4
0000004_16.tif	CX7389	Control	10.975	11.337	5.14583	2.77647	-2.36936	0	0.295	0.81906	-0.69896	4
0000004_16.tif	CX7389	Control	10.31	11.358	5.14583	3.44006	-1.70577	0	0.295	1.01482	-0.503203	4
0000004_16.tif	CX7389	Control	16.355	11.408	5.14583	2.64869	-2.49714	0	0.295	0.781364	-0.736656	4
0000004_16.tif	CX7389	Control	10.128	11.934	5.14583	3.71856	-1.42727	0	0.295	1.09698	-0.421044	4
0000004_16.tif	CX7389	Control	9.17	12.092	5.14583	4.68684	-0.458991	0	0.295	1.38262	-0.135402	4
0000004_16.tif	CX7389	Control	10.465	12.078	5.14583	3.4341	-1.71173	0	0.295	1.01306	-0.504959	4
0000004_16.tif	CX7389	Control	11.362	12.242	5.14583	2.66553	-2.4803	0	0.295	0.786331	-0.731689	4
0000004_16.tif	CX7389	Control	11.237	12.296	5.14583	2.80141	-2.34442	0	0.295	0.826417	-0.691603	4
0000004_16.tif	CX7389	Control	11.92	12.599	5.14583	2.40103	-2.7448	0	0.295	0.708303	-0.809717	4
0000004_16.tif	CX7389	Control	9.433	13.088	5.14583	4.76974	-0.376087	0	0.295	1.40707	-0.110946	4
0000004_16.tif	CX7389	Control	9.144	13.128	5.14583	5.04842	-0.0974137	0	0.295	1.48928	-0.028737	4
0000004_16.tif	CX7389	Control	16.089	13.141	5.14583	3.16532	-1.98051	0	0.295	0.933769	-0.58425	4
0000004_16.tif	CX7389	Control	11.096	13.188	5.14583	3.41076	-1.73507	0	0.295	1.00617	-0.511845	4
0000004_16.tif	CX7389	Control	21.598	13.182	5.14583	8.15419	3.00836	1	0.295	2.40549	0.887467	4
0000004_16.tif	CX7389	Control	15.503	13.251	5.14583	2.84253	-2.3033	0	0.295	0.838547	-0.679473	4
0000004_16.tif	CX7389	Control	16.149	13.361	5.14583	3.35923	-1.7866	0	0.295	0.990974	-0.527046	4
0000004_16.tif	CX7389	Control	10.515	13.383	5.14583	3.98966	-1.15617	0	0.295	1.17695	-0.341069	4
0000004_16.tif	CX7389	Control	15.117	14.065	5.14583	3.33889	-1.80694	0	0.295	0.984974	-0.533046	4
0000004_16.tif	CX7389	Control	14.116	14.489	5.14583	3.48401	-1.66182	0	0.295	1.02778	-0.490238	4
0000004_16.tif	CX7389	Control	15.21	14.479	5.14583	3.75523	-1.3906	0	0.295	1.10779	-0.410226	4
0000004_16.tif	CX7389	Control	13.772	14.591	5.14583	3.5652	-1.58063	0	0.295	1.05173	-0.466285	4
0000004_16.tif	CX7389	Control	14.073	14.8	5.14583	3.78919	-1.35663	0	0.295	1.11781	-0.400207	4
0000004_16.tif	CX7389	Control	16.173	14.921	5.14583	4.59562	-0.550207	0	0.295	1.35571	-0.162311	4
0000004_16.tif	CX7389	Control	15.444	15.015	5.14583	4.34007	-0.805758	0	0.295	1.28032	-0.237699	4
0000004_16.tif	CX7389	Control	15.419	15.182	5.14583	4.48459	-0.661238	0	0.295	1.32295	-0.195065	4
0000004_16.tif	CX7389	Control	12.918	15.241	5.14583	4.29326	-0.85257	0	0.295	1.26651	-0.251508	4
0000004_16.tif	CX7389	Control	12.64	15.734	5.14583	4.83344	-0.312394	0	0.295	1.42586	-0.0921562	4
0000004_16.tif	CX7389	Control	11.66	15.746	5.14583	5.15557	0.00973782	1	0.295	1.52089	0.00287266	4
0000004_16.tif	CX7389	Control	11.438	15.972	5.14583	5.45294	0.307108	1	0.295	1.60862	0.0905969	4
0000004_16.tif	CX7389	Control	11.248	15.989	5.14583	5.55082	0.404987	1	0.295	1.63749	0.119471	4
0000004_16.tif	CX7389	Control	7.743	16.011	5.14583	7.79374	2.64791	1	0.295	2.29915	0.781132	4
0000004_16.tif	CX7389	Control	16.504	16.086	5.14583	5.76858	0.622749	1	0.295	1.70173	0.183711	4
0000004_16.tif	CX7389	Control	13.556	17.257	5.14583	6.23354	1.08771	1	0.295	1.83889	0.320875	4
0000004_16.tif	CX7389	Control	13.51	17.376	5.14583	6.35395	1.20812	1	0.295	1.87442	0.356395	4
0000004_16.tif	CX7389	Control	13.133	18.771	5.14583	7.76828	2.62245	1	0.295	2.29164	0.773624	4
0000004_16.tif	CX7389	Control	13.441	19.173	5.14583	8.15227	3.00644	1	0.295	2.40492	0.886899	4
0000004_16.tif	CX7389	Control	12.321	19.724	5.14583	8.81202	3.66619	1	0.295	2.59955	1.08153	4
0000004_16.tif	CX7389	Control	11.762	20.389	5.14583	9.56841	4.42258	1	0.295	2.82268	1.30466	4
0000005_11.tif	CX7389	Control	13.965	0.631	4.43584	10.7133	6.27747	1	0.295	3.16042	1.85185	4
0000005_11.tif	CX7389	Control	13.947	0.836	4.43584	10.509	6.07316	1	0.295	3.10015	1.79158	4
0000005_11.tif	CX7389	Control	14.569	0.893	4.43584	10.4494	6.01358	1	0.295	3.08258	1.774	4
0000005_11.tif	CX7389	Control	15.734	1.917	4.43584	9.5302	5.09436	1	0.295	2.81141	1.50284	4
0000005_11.tif	CX7389	Control	15.977	1.932	4.43584	9.55496	5.11912	1	0.295	2.81871	1.51014	4
0000005_11.tif	CX7389	Control	15.581	2.038	4.43584	9.38853	4.95269	1	0.295	2.76962	1.46104	4
0000005_11.tif	CX7389	Control	14.524	2.181	4.43584	9.16069	4.72485	1	0.295	2.7024	1.39383	4
0000005_11.tif	CX7389	Control	14.62	2.293	4.43584	9.05159	4.61575	1	0.295	2.67022	1.36165	4
0000005_11.tif	CX7389	Control	20.192	3.163	4.43584	10.0767	5.64082	1	0.295	2.97261	1.66404	4
0000005_11.tif	CX7389	Control	20.314	3.282	4.43584	10.0528	5.61699	1	0.295	2.96558	1.65701	4
0000005_11.tif	CX7389	Control	16.686	3.669	4.43584	8.03196	3.59612	1	0.295	2.36943	1.06086	4
0000005_11.tif	CX7389	Control	16.618	3.902	4.43584	7.78928	3.35344	1	0.295	2.29784	0.989265	4
0000005_11.tif	CX7389	Control	15.369	5.015	4.43584	6.41338	1.97755	1	0.295	1.89195	0.583376	4
0000005_11.tif	CX7389	Control	15.312	5.896	4.43584	5.53591	1.10008	1	0.295	1.63309	0.324523	4
0000005_11.tif	CX7389	Control	8.805	7.003	4.43584	7.00128	2.56544	1	0.295	2.06538	0.756806	4
0000005_11.tif	CX7389	Control	7.058	7.37	4.43584	8.26005	3.82422	1	0.295	2.43672	1.12814	4
0000005_11.tif	CX7389	Control	6.772	7.572	4.43584	8.41969	3.98385	1	0.295	2.48381	1.17524	4
0000005_11.tif	CX7389	Control	9.207	7.698	4.43584	6.26226	1.82642	1	0.295	1.84737	0.538795	4
0000005_11.tif	CX7389	Control	6.548	7.857	4.43584	8.49993	4.0641	1	0.295	2.50748	1.19891	4
0000005_11.tif	CX7389	Control	9.684	7.908	4.43584	5.75306	1.31722	1	0.295	1.69715	0.388581	4
0000005_11.tif	CX7389	Control	5.297	8.643	4.43584	9.39992	4.96408	1	0.295	2.77298	1.4644	4
0000005_11.tif	CX7389	Control	5.365	8.774	4.43584	9.29781	4.86197	1	0.295	2.74285	1.43428	4
0000005_11.tif	CX7389	Control	7.016	9.614	4.43584	7.48742	3.05158	1	0.295	2.20879	0.900216	4
0000005_11.tif	CX7389	Control	7.679	9.768	4.43584	6.80677	2.37094	1	0.295	2.008	0.699427	4
0000005_11.tif	CX7389	Control	5.393	9.964	4.43584	9.01448	4.57865	1	0.295	2.65927	1.3507	4
0000005_11.tif	CX7389	Control	5.341	10.151	4.43584	9.03941	4.60357	1	0.295	2.66662	1.35805	4
0000005_11.tif	CX7389	Control	11.286	10.199	4.43584	3.22426	-1.21158	0	0.295	0.951157	-0.357415	4
0000005_11.tif	CX7389	Control	8.534	10.295	4.43584	5.86172	1.42588	1	0.295	1.72921	0.420636	4
0000005_11.tif	CX7389	Control	6.997	10.456	4.43584	7.35817	2.92234	1	0.295	2.17066	0.862089	4
0000005_11.tif	CX7389	Control	6.62	10.524	4.43584	7.72511	3.28928	1	0.295	2.27891	0.970336	4
0000005_11.tif	CX7389	Control	8.212	10.626	4.43584	6.1316	1.69576	1	0.295	1.80882	0.500249	4
0000005_11.tif	CX7389	Control	12.458	11.234	4.43584	1.84699	-2.58885	0	0.295	0.544861	-0.763711	4
0000005_11.tif	CX7389	Control	5.863	11.338	4.43584	8.439	4.00316	1	0.295	2.48951	1.18093	4
0000005_11.tif	CX7389	Control	7.713	11.471	4.43584	6.59032	2.15449	1	0.295	1.94415	0.635573	4
0000005_11.tif	CX7389	Control	6.918	11.513	4.43584	7.38605	2.95021	1	0.295	2.17888	0.870313	4
0000005_11.tif	CX7389	Control	6.844	11.592	4.43584	7.46229	3.02645	1	0.295	2.20138	0.892804	4
0000005_11.tif	CX7389	Control	5.814	11.684	4.43584	8.49501	4.05917	1	0.295	2.50603	1.19746	4
0000005_11.tif	CX7389	Control	4.912	11.702	4.43584	9.39701	4.96118	1	0.295	2.77212	1.46355	4
0000005_11.tif	CX7389	Control	23.466	11.753	4.43584	9.17335	4.73751	1	0.295	2.70614	1.39757	4
0000005_11.tif	CX7389	Control	13.035	12.261	4.43584	1.56696	-2.86887	0	0.295	0.462254	-0.846318	4
0000005_11.tif	CX7389	Control	15.606	12.274	4.43584	1.60457	-2.83127	0	0.295	0.473348	-0.835224	4
0000005_11.tif	CX7389	Control	27.972	12.319	4.43584	13.7051	9.26925	1	0.295	4.043	2.73443	4
0000005_11.tif	CX7389	Control	7.593	12.328	4.43584	6.7815	2.34567	1	0.295	2.00054	0.691972	4
0000005_11.tif	CX7389	Control	4.93	12.357	4.43584	9.42713	4.99129	1	0.295	2.781	1.47243	4
0000005_11.tif	CX7389	Control	15.085	12.375	4.43584	1.29861	-3.13723	0	0.295	0.38309	-0.925482	4
0000005_11.tif	CX7389	Control	15.479	12.372	4.43584	1.56602	-2.86982	0	0.295	0.461976	-0.846596	4
0000005_11.tif	CX7389	Control	15.211	12.389	4.43584	1.38881	-3.04703	0	0.295	0.409698	-0.898874	4
0000005_11.tif	CX7389	Control	4.897	12.526	4.43584	9.47961	5.04377	1	0.295	2.79648	1.48791	4
0000005_11.tif	CX7389	Control	4.857	12.623	4.43584	9.53188	5.09604	1	0.295	2.8119	1.50333	4
0000005_11.tif	CX7389	Control	4.91	12.728	4.43584	9.49416	5.05832	1	0.295	2.80078	1.4922	4
0000005_11.tif	CX7389	Control	8.15	12.922	4.43584	6.3524	1.91656	1	0.295	1.87396	0.565386	4
0000005_11.tif	CX7389	Control	4.717	12.946	4.43584	9.71878	5.28294	1	0.295	2.86704	1.55847	4
0000005_11.tif	CX7389	Control	15.034	13.156	4.43584	1.95891	-2.47693	0	0.295	0.577877	-0.730694	4
0000005_11.tif	CX7389	Control	14.93	13.385	4.43584	2.14021	-2.29563	0	0.295	0.631362	-0.67721	4
0000005_11.tif	CX7389	Control	14.282	13.76	4.43584	2.42108	-2.01475	0	0.295	0.714219	-0.594352	4
0000005_11.tif	CX7389	Control	4.89	13.785	4.43584	9.72464	5.28881	1	0.295	2.86877	1.5602	4
0000005_11.tif	CX7389	Control	23.916	14.052	4.43584	9.98946	5.55363	1	0.295	2.94689	1.63832	4
0000005_11.tif	CX7389	Control	13.506	14.586	4.43584	3.34315	-1.09269	0	0.295	0.986228	-0.322344	4
0000005_11.tif	CX7389	Control	14.729	15.013	4.43584	3.69873	-0.737106	0	0.295	1.09113	-0.217446	4
0000005_11.tif	CX7389	Control	6.273	15.375	4.43584	8.98633	4.55049	1	0.295	2.65097	1.3424	4
0000005_11.tif	CX7389	Control	4.974	15.43	4.43584	10.1857	5.74983	1	0.295	3.00477	1.6962	4
0000005_11.tif	CX7389	Control	5.371	15.655	4.43584	9.9192	5.48337	1	0.295	2.92617	1.61759	4
0000005_11.tif	CX7389	Control	5.407	15.828	4.43584	9.96354	5.5277	1	0.295	2.93924	1.63067	4
0000005_11.tif	CX7389	Control	5.227	16.36	4.43584	10.3714	5.93557	1	0.295	3.05956	1.75099	4
0000005_11.tif	CX7389	Control	20.916	16.383	4.43584	8.31787	3.88203	1	0.295	2.45377	1.1452	4
0000005_11.tif	CX7389	Control	20.866	16.472	4.43584	8.33269	3.89686	1	0.295	2.45814	1.14957	4
0000005_11.tif	CX7389	Control	7.927	16.815	4.43584	8.404	3.96816	1	0.295	2.47918	1.17061	4
0000005_11.tif	CX7389	Control	6.116	16.882	4.43584	9.88612	5.45029	1	0.295	2.91641	1.60783	4
0000005_11.tif	CX7389	Control	8.027	16.993	4.43584	8.4465	4.01066	1	0.295	2.49172	1.18315	4
0000005_11.tif	CX7389	Control	9.913	17.798	4.43584	7.8091	3.37326	1	0.295	2.30368	0.995112	4
0000005_11.tif	CX7389	Control	9.382	17.985	4.43584	8.26896	3.83312	1	0.295	2.43934	1.13077	4
0000005_11.tif	CX7389	Control	12.314	19.07	4.43584	7.98251	3.54668	1	0.295	2.35484	1.04627	4
0000005_11.tif	CX7389	Control	20.264	19.16	4.43584	9.8343	5.39847	1	0.295	2.90112	1.59255	4
0000005_11.tif	CX7389	Control	8.572	19.183	4.43584	9.71397	5.27813	1	0.295	2.86562	1.55705	4
0000005_11.tif	CX7389	Control	8.336	19.244	4.43584	9.90364	5.46781	1	0.295	2.92158	1.613	4
0000005_11.tif	CX7389	Control	12.702	19.327	4.43584	8.14666	3.71083	1	0.295	2.40327	1.09469	4
0000005_11.tif	CX7389	Control	13.37	19.345	4.43584	8.06007	3.62423	1	0.295	2.37772	1.06915	4
0000005_11.tif	CX7389	Control	10.242	19.452	4.43584	9.07218	4.63634	1	0.295	2.67629	1.36772	4
0000005_11.tif	CX7389	Control	13.454	19.591	4.43584	8.29546	3.85962	1	0.295	2.44716	1.13859	4
0000005_11.tif	CX7389	Control	15.203	20.49	4.43584	9.19525	4.75941	1	0.295	2.7126	1.40403	4
0000005_11.tif	CX7389	Control	17.063	20.506	4.43584	9.57377	5.13793	1	0.295	2.82426	1.51569	4
0000005_11.tif	CX7389	Control	17.483	20.554	4.43584	9.74859	5.31275	1	0.295	2.87583	1.56726	4
0000015_22.tif	CX7389	Control	10.374	4.418	4.25524	8.28395	4.02871	1	0.295	2.44377	1.18847	4
0000015_22.tif	CX7389	Control	10.246	5.208	4.25524	7.71467	3.45944	1	0.295	2.27583	1.02053	4
0000015_22.tif	CX7389	Control	15.261	8.161	4.25524	3.18293	-1.07231	0	0.295	0.938963	-0.316333	4
0000015_22.tif	CX7389	Control	13.493	8.28	4.25524	3.37532	-0.879916	0	0.295	0.99572	-0.259575	4
0000015_22.tif	CX7389	Control	16.104	8.286	4.25524	3.25602	-0.999216	0	0.295	0.960527	-0.294769	4
0000015_22.tif	CX7389	Control	15.993	8.334	4.25524	3.17278	-1.08246	0	0.295	0.93597	-0.319325	4
0000015_22.tif	CX7389	Control	15.818	8.513	4.25524	2.94786	-1.30738	0	0.295	0.869617	-0.385678	4
0000015_22.tif	CX7389	Control	12.318	8.552	4.25524	3.82058	-0.434663	0	0.295	1.12707	-0.128226	4
0000015_22.tif	CX7389	Control	11.771	8.677	4.25524	4.13393	-0.121308	0	0.295	1.21951	-0.0357858	4
0000015_22.tif	CX7389	Control	16.202	8.737	4.25524	2.88069	-1.37455	0	0.295	0.849803	-0.405493	4
0000015_22.tif	CX7389	Control	15.529	8.85	4.25524	2.54635	-1.70889	0	0.295	0.751172	-0.504123	4
0000015_22.tif	CX7389	Control	15.866	8.884	4.25524	2.61248	-1.64276	0	0.295	0.770682	-0.484613	4
0000015_22.tif	CX7389	Control	12.641	9.006	4.25524	3.26969	-0.985547	0	0.295	0.964559	-0.290736	4
0000015_22.tif	CX7389	Control	12.901	9.047	4.25524	3.06149	-1.19375	0	0.295	0.90314	-0.352156	4
0000015_22.tif	CX7389	Control	16.24	9.136	4.25524	2.54697	-1.70827	0	0.295	0.751357	-0.503938	4
0000015_22.tif	CX7389	Control	15.469	9.223	4.25524	2.16972	-2.08552	0	0.295	0.640068	-0.615227	4
0000015_22.tif	CX7389	Control	14.718	9.25	4.25524	2.09015	-2.16509	0	0.295	0.616593	-0.638702	4
0000015_22.tif	CX7389	Control	15.996	9.259	4.25524	2.32154	-1.93369	0	0.295	0.684856	-0.57044	4
0000015_22.tif	CX7389	Control	8.474	9.433	4.25524	6.74084	2.48561	1	0.295	1.98855	0.733254	4
0000015_22.tif	CX7389	Control	17.059	9.472	4.25524	2.81464	-1.4406	0	0.295	0.830318	-0.424977	4
0000015_22.tif	CX7389	Control	12.516	9.535	4.25524	3.01748	-1.23776	0	0.295	0.890156	-0.365139	4
0000015_22.tif	CX7389	Control	13.783	9.558	4.25524	2.11625	-2.13899	0	0.295	0.624293	-0.631003	4
0000015_22.tif	CX7389	Control	16.143	9.645	4.25524	2.067	-2.18824	0	0.295	0.609765	-0.64553	4
0000015_22.tif	CX7389	Control	16.297	9.668	4.25524	2.14218	-2.11306	0	0.295	0.631942	-0.623354	4
0000015_22.tif	CX7389	Control	16.655	9.691	4.25524	2.36869	-1.88654	0	0.295	0.698765	-0.556531	4
0000015_22.tif	CX7389	Control	14.284	9.756	4.25524	1.70454	-2.5507	0	0.295	0.50284	-0.752455	4
0000015_22.tif	CX7389	Control	17.536	9.819	4.25524	3.00012	-1.25512	0	0.295	0.885036	-0.37026	4
0000015_22.tif	CX7389	Control	16.969	9.848	4.25524	2.509	-1.74624	0	0.295	0.740155	-0.515141	4
0000015_22.tif	CX7389	Control	16.416	10.074	4.25524	1.93449	-2.32075	0	0.295	0.570674	-0.684621	4
0000015_22.tif	CX7389	Control	12.226	10.086	4.25524	2.98742	-1.26782	0	0.295	0.881288	-0.374008	4
0000015_22.tif	CX7389	Control	17.183	10.086	4.25524	2.56128	-1.69396	0	0.295	0.755578	-0.499717	4
0000015_22.tif	CX7389	Control	13.202	10.305	4.25524	2.01931	-2.23593	0	0.295	0.595696	-0.659599	4
0000015_22.tif	CX7389	Control	16.179	10.33	4.25524	1.58862	-2.66662	0	0.295	0.468642	-0.786654	4
0000015_22.tif	CX7389	Control	12.224	10.579	4.25524	2.82028	-1.43496	0	0.295	0.831982	-0.423314	4
0000015_22.tif	CX7389	Control	9.321	10.744	4.25524	5.65225	1.39701	1	0.295	1.66741	0.412119	4
0000015_22.tif	CX7389	Control	18.907	11.117	4.25524	3.96961	-0.285627	0	0.295	1.17104	-0.08426	4
0000015_22.tif	CX7389	Control	17.081	11.367	4.25524	2.13836	-2.11688	0	0.295	0.630815	-0.624481	4
0000015_22.tif	CX7389	Control	17.533	11.398	4.25524	2.59095	-1.66429	0	0.295	0.764329	-0.490966	4
0000015_22.tif	CX7389	Control	15.895	11.454	4.25524	0.960302	-3.29494	0	0.295	0.283289	-0.972006	4
0000015_22.tif	CX7389	Control	16.822	11.533	4.25524	1.89015	-2.36509	0	0.295	0.557594	-0.697701	4
0000015_22.tif	CX7389	Control	15.902	11.58	4.25524	0.991557	-3.26368	0	0.295	0.292509	-0.962786	4
0000015_22.tif	CX7389	Control	16.038	11.611	4.25524	1.13098	-3.12426	0	0.295	0.333639	-0.921657	4
0000015_22.tif	CX7389	Control	16.859	11.679	4.25524	1.94789	-2.30735	0	0.295	0.574626	-0.680669	4
0000015_22.tif	CX7389	Control	17.179	11.726	4.25524	2.27115	-1.98409	0	0.295	0.669988	-0.585308	4
0000015_22.tif	CX7389	Control	15.812	11.839	4.25524	1.00811	-3.24713	0	0.295	0.297392	-0.957904	4
0000015_22.tif	CX7389	Control	17.13	11.863	4.25524	2.25149	-2.00375	0	0.295	0.664189	-0.591107	4
0000015_22.tif	CX7389	Control	16.944	11.949	4.25524	2.09515	-2.16009	0	0.295	0.618068	-0.637227	4
0000015_22.tif	CX7389	Control	14.814	12.082	4.25524	0.764956	-3.49028	0	0.295	0.225662	-1.02963	4
0000015_22.tif	CX7389	Control	15.947	12.305	4.25524	1.40091	-2.85433	0	0.295	0.413268	-0.842027	4
0000015_22.tif	CX7389	Control	12.809	12.336	4.25524	2.36009	-1.89515	0	0.295	0.696226	-0.559069	4
0000015_22.tif	CX7389	Control	17.418	12.752	4.25524	2.85542	-1.39982	0	0.295	0.842348	-0.412948	4
0000015_22.tif	CX7389	Control	6.232	12.875	4.25524	8.8473	4.59206	1	0.295	2.60995	1.35466	4
0000015_22.tif	CX7389	Control	17.253	12.973	4.25524	2.83586	-1.41937	0	0.295	0.83658	-0.418716	4
0000015_22.tif	CX7389	Control	13.112	13.136	4.25524	2.57321	-1.68203	0	0.295	0.759098	-0.496198	4
0000015_22.tif	CX7389	Control	12.803	13.22	4.25524	2.85644	-1.3988	0	0.295	0.842651	-0.412645	4
0000015_22.tif	CX7389	Control	12.977	13.229	4.25524	2.73477	-1.52047	0	0.295	0.806757	-0.448539	4
0000015_22.tif	CX7389	Control	11.17	13.349	4.25524	4.28018	0.0249445	1	0.295	1.26265	0.00735864	4
0000015_22.tif	CX7389	Control	18.385	13.41	4.25524	4.0227	-0.232542	0	0.295	1.1867	-0.0686	4
0000015_22.tif	CX7389	Control	12.842	13.468	4.25524	2.99897	-1.25627	0	0.295	0.884695	-0.3706	4
0000015_22.tif	CX7389	Control	14.691	13.75	4.25524	2.43507	-1.82016	0	0.295	0.718347	-0.536948	4
0000015_22.tif	CX7389	Control	17.58	13.788	4.25524	3.6063	-0.648943	0	0.295	1.06386	-0.191438	4
0000015_22.tif	CX7389	Control	15.313	13.847	4.25524	2.54603	-1.70921	0	0.295	0.751078	-0.504217	4
0000015_22.tif	CX7389	Control	14.671	14.035	4.25524	2.72063	-1.53461	0	0.295	0.802586	-0.452709	4
0000015_22.tif	CX7389	Control	15.326	14.055	4.25524	2.75376	-1.50147	0	0.295	0.81236	-0.442935	4
0000015_22.tif	CX7389	Control	17.647	14.067	4.25524	3.84886	-0.406377	0	0.295	1.13541	-0.119881	4
0000015_22.tif	CX7389	Control	16.323	14.173	4.25524	3.16203	-1.09321	0	0.295	0.932798	-0.322497	4
0000015_22.tif	CX7389	Control	15.402	14.746	4.25524	3.44868	-0.806557	0	0.295	1.01736	-0.237934	4
0000015_22.tif	CX7389	Control	14.687	15.18	4.25524	3.8605	-0.394741	0	0.295	1.13885	-0.116449	4
0000015_22.tif	CX7389	Control	15.213	15.283	4.25524	3.96421	-0.291033	0	0.295	1.16944	-0.0858549	4
0000015_22.tif	CX7389	Control	14.486	17.611	4.25524	6.2996	2.04436	1	0.295	1.85838	0.603086	4
0000033_19.tif	CX7389	Control	16.12	6.676	5.11468	5.17499	0.0603076	1	0.295	1.52662	0.0177907	4
0000033_19.tif	CX7389	Control	18.402	7.39	5.11468	5.47859	0.363912	1	0.295	1.61619	0.107354	4
0000033_19.tif	CX7389	Control	10.207	7.638	5.11468	6.37135	1.25667	1	0.295	1.87955	0.370717	4
0000033_19.tif	CX7389	Control	8.301	7.692	5.11468	7.89649	2.78181	1	0.295	2.32946	0.820633	4
0000033_19.tif	CX7389	Control	14.871	8.157	5.11468	3.59397	-1.52072	0	0.295	1.06022	-0.448611	4
0000033_19.tif	CX7389	Control	11.976	8.191	5.11468	4.71734	-0.39734	0	0.295	1.39162	-0.117215	4
0000033_19.tif	CX7389	Control	11.352	8.269	5.11468	5.09565	-0.0190325	0	0.295	1.50322	-0.00561457	4
0000033_19.tif	CX7389	Control	12.122	8.278	5.11468	4.5561	-0.558585	0	0.295	1.34405	-0.164783	4
0000033_19.tif	CX7389	Control	15.226	8.288	5.11468	3.46017	-1.65452	0	0.295	1.02075	-0.488082	4
0000033_19.tif	CX7389	Control	14.414	8.299	5.11468	3.50939	-1.60529	0	0.295	1.03527	-0.473562	4
0000033_19.tif	CX7389	Control	12.676	8.369	5.11468	4.14331	-0.971377	0	0.295	1.22228	-0.286556	4
0000033_19.tif	CX7389	Control	14.021	8.577	5.11468	3.33968	-1.775	0	0.295	0.985206	-0.523625	4
0000033_19.tif	CX7389	Control	15.433	8.577	5.11468	3.18783	-1.92685	0	0.295	0.940409	-0.568422	4
0000033_19.tif	CX7389	Control	14.182	8.658	5.11468	3.2144	-1.90028	0	0.295	0.948249	-0.560583	4
0000033_19.tif	CX7389	Control	14.865	8.73	5.11468	3.02251	-2.09217	0	0.295	0.891642	-0.61719	4
0000033_19.tif	CX7389	Control	10.568	8.724	5.11468	5.42831	0.313626	1	0.295	1.60135	0.0925198	4
0000033_19.tif	CX7389	Control	17.884	9.008	5.11468	3.9198	-1.19489	0	0.295	1.15634	-0.352491	4
0000033_19.tif	CX7389	Control	11.352	9.043	5.11468	4.60259	-0.512088	0	0.295	1.35777	-0.151066	4
0000033_19.tif	CX7389	Control	11.319	9.157	5.11468	4.56375	-0.550932	0	0.295	1.34631	-0.162525	4
0000033_19.tif	CX7389	Control	14.227	9.429	5.11468	2.4674	-2.64728	0	0.295	0.727883	-0.780949	4
0000033_19.tif	CX7389	Control	18.752	9.444	5.11468	4.33508	-0.779608	0	0.295	1.27885	-0.229984	4
0000033_19.tif	CX7389	Control	11.354	9.679	5.11468	4.2587	-0.855982	0	0.295	1.25632	-0.252515	4
0000033_19.tif	CX7389	Control	16.581	9.665	5.11468	2.56621	-2.54848	0	0.295	0.757031	-0.751801	4
0000033_19.tif	CX7389	Control	14.57	9.867	5.11468	1.94549	-3.16919	0	0.295	0.573921	-0.934911	4
[truncated: 14,865 more rows]
