# Supplementary material for: Dopamine signaling regulates predator-driven changes in Caenorhabditis elegans’ egg laying behavior
Source: eLife. 2023 Jul 11;12:e83957. doi: 10.7554/eLife.83957 (PMC10335835; doi:10.7554/eLife.83957)
Supplement: Figure 1—figure supplement 4—source data 1. — Individual animal fluorescence data is tabulated with strain, predator condition, GFP intensity, dsRed intensity, the calculated GFP/dsRed ratio, the calculated log2 GFP/dsRed ratio, the normalized log2 GFP/dsRed set relative to the average of the mock (control) condition, and time in hr. [file elife-83957-fig1-figsupp4-data1.xlsx]

## Sheet: Figure1-S1D
Strain	Predator	GFP	dsRed	ratio	log2ratio	normalizer	norm_log2ratio	t
TU445	eud-1	16.415	57.392	0.286015	-1.80583	-1.78552	-0.0203144	2
TU445	eud-1	17.064	54.055	0.315678	-1.66347	-1.78552	0.122048	2
TU445	eud-1	15.421	49.495	0.311567	-1.68239	-1.78552	0.103134	2
TU445	eud-1	22.2	47.817	0.46427	-1.10696	-1.78552	0.678557	2
TU445	eud-1	17.506	49.274	0.355279	-1.49298	-1.78552	0.292543	2
TU445	eud-1	18.051	65.264	0.276584	-1.85421	-1.78552	-0.0686881	2
TU445	eud-1	14.541	53.355	0.272533	-1.8755	-1.78552	-0.0899765	2
TU445	eud-1	13.241	41.06	0.322479	-1.63272	-1.78552	0.152799	2
TU445	eud-1	15.231	51.003	0.298629	-1.74357	-1.78552	0.0419491	2
TU445	eud-1	15.987	50.958	0.313729	-1.67241	-1.78552	0.113111	2
TU445	eud-1	13.683	50.54	0.270736	-1.88504	-1.78552	-0.0995206	2
TU445	eud-1	14.159	55.156	0.256708	-1.9618	-1.78552	-0.176278	2
TU445	eud-1	13.497	59.234	0.227859	-2.13379	-1.78552	-0.348266	2
TU445	eud-1	14.211	49.192	0.288888	-1.79142	-1.78552	-0.00589513	2
TU445	eud-1	13.367	57.27	0.233403	-2.0991	-1.78552	-0.313583	2
TU445	eud-1	13.667	57.812	0.236404	-2.08067	-1.78552	-0.295152	2
TU445	eud-1	16.973	56.474	0.300545	-1.73435	-1.78552	0.0511753	2
TU445	eud-1	53.634	72.647	0.738282	-0.437755	-1.78552	1.34777	2
TU445	eud-1	22.862	68.191	0.335264	-1.57663	-1.78552	0.208891	2
TU445	eud-1	16.68	53.104	0.314101	-1.6707	-1.78552	0.114819	2
TU445	eud-1	17.805	63.092	0.282207	-1.82517	-1.78552	-0.0396541	2
TU445	eud-1	22.539	41.434	0.543974	-0.878392	-1.78552	0.907129	2
TU445	eud-1	19.715	68.365	0.288379	-1.79396	-1.78552	-0.0084437	2
TU445	eud-1	17.349	62.996	0.275398	-1.86041	-1.78552	-0.0748872	2
TU445	eud-1	16.113	56.108	0.287178	-1.79998	-1.78552	-0.0144609	2
TU445	eud-1	17.16	64.088	0.267757	-1.901	-1.78552	-0.115484	4
TU445	eud-1	16.233	54.054	0.300311	-1.73547	-1.78552	0.0500488	4
TU445	eud-1	17.409	62.963	0.276496	-1.85467	-1.78552	-0.0691504	4
TU445	eud-1	15.004	52.496	0.285812	-1.80686	-1.78552	-0.0213398	4
TU445	eud-1	15.074	45.078	0.334398	-1.58036	-1.78552	0.205159	4
TU445	eud-1	17.946	64.307	0.279068	-1.84131	-1.78552	-0.055793	4
TU445	eud-1	18.061	56.574	0.319246	-1.64726	-1.78552	0.138259	4
TU445	eud-1	21.86	50.464	0.43318	-1.20696	-1.78552	0.578559	4
TU445	eud-1	13.889	52.941	0.262349	-1.93044	-1.78552	-0.144922	4
TU445	eud-1	13.221	60.92	0.217022	-2.20408	-1.78552	-0.418564	4
TU445	eud-1	15.493	65.696	0.235829	-2.08419	-1.78552	-0.298668	4
TU445	eud-1	15.779	58.164	0.271285	-1.88212	-1.78552	-0.0966002	4
TU445	eud-1	16.777	55.804	0.300642	-1.73388	-1.78552	0.0516367	4
TU445	eud-1	13.514	54.432	0.248273	-2.01	-1.78552	-0.22448	4
TU445	eud-1	14.139	62.404	0.226572	-2.14196	-1.78552	-0.356438	4
TU445	eud-1	18.41	63.013	0.292162	-1.77516	-1.78552	0.0103606	4
TU445	eud-1	14.843	59.301	0.250299	-1.99827	-1.78552	-0.212753	4
TU445	eud-1	20.437	70.772	0.288772	-1.792	-1.78552	-0.00647475	4
TU445	eud-1	23.335	45.147	0.516867	-0.952135	-1.78552	0.833386	4
TU445	eud-1	22.502	77.012	0.292188	-1.77503	-1.78552	0.0104905	4
TU445	eud-1	18.553	64.548	0.28743	-1.79872	-1.78552	-0.0131994	4
TU445	eud-1	17.7	63.648	0.278092	-1.84637	-1.78552	-0.0608453	4
TU445	eud-1	57.244	67.033	0.853967	-0.227747	-1.78552	1.55777	4
TU445	eud-1	22.303	71.032	0.313985	-1.67123	-1.78552	0.114289	4
TU445	eud-1	19.301	57.213	0.337353	-1.56767	-1.78552	0.217853	4
TU445	eud-1	21.191	52.365	0.404679	-1.30515	-1.78552	0.480369	6
TU445	eud-1	17.443	54.472	0.32022	-1.64287	-1.78552	0.142654	6
TU445	eud-1	15.043	52.508	0.28649	-1.80344	-1.78552	-0.0179244	6
TU445	eud-1	16.003	60.696	0.263658	-1.92326	-1.78552	-0.137739	6
TU445	eud-1	16.082	62.464	0.25746	-1.95758	-1.78552	-0.172058	6
TU445	eud-1	14.506	45.404	0.319487	-1.64617	-1.78552	0.139351	6
TU445	eud-1	14.833	54.664	0.271349	-1.88178	-1.78552	-0.0962601	6
TU445	eud-1	16.856	61.911	0.272262	-1.87693	-1.78552	-0.091413	6
TU445	eud-1	13.61	66.687	0.204088	-2.29274	-1.78552	-0.507218	6
TU445	eud-1	15.491	60.28	0.256984	-1.96025	-1.78552	-0.174729	6
TU445	eud-1	13.931	59.488	0.234182	-2.0943	-1.78552	-0.308779	6
TU445	eud-1	14.377	68.141	0.210989	-2.24476	-1.78552	-0.45924	6
TU445	eud-1	15.876	62.304	0.254815	-1.97248	-1.78552	-0.186957	6
TU445	eud-1	17.183	62.25	0.276032	-1.85709	-1.78552	-0.0715714	6
TU445	eud-1	14.835	54.063	0.274402	-1.86564	-1.78552	-0.0801161	6
TU445	eud-1	17.588	58.338	0.301484	-1.72984	-1.78552	0.055676	6
TU445	eud-1	16.69	63.029	0.264799	-1.91703	-1.78552	-0.131511	6
TU445	eud-1	18.184	68.03	0.267294	-1.9035	-1.78552	-0.117981	6
TU445	eud-1	19.817	70.343	0.28172	-1.82767	-1.78552	-0.0421478	6
TU445	eud-1	23.262	75.381	0.308592	-1.69623	-1.78552	0.0892947	6
TU445	eud-1	23.636	58.015	0.407412	-1.29544	-1.78552	0.49008	6
TU445	eud-1	20.827	79.376	0.262384	-1.93025	-1.78552	-0.144727	6
TU445	eud-1	23.285	66.343	0.350979	-1.51054	-1.78552	0.274977	6
TU445	eud-1	62.169	81.566	0.762193	-0.391773	-1.78552	1.39375	6
TU445	eud-1	19.915	55.23	0.360583	-1.4716	-1.78552	0.313924	6
IV869	Control	14.803	53.324	0.277605	-1.8489	-1.78552	-0.0633749	2
IV869	Control	15.659	56.842	0.275483	-1.85997	-1.78552	-0.0744447	2
IV869	Control	14.505	51.779	0.280133	-1.83582	-1.78552	-0.0502963	2
IV869	Control	16.632	51.306	0.324173	-1.62517	-1.78552	0.160355	2
IV869	Control	16.888	49.648	0.340155	-1.55574	-1.78552	0.229783	2
IV869	Control	14.1	43.174	0.326585	-1.61447	-1.78552	0.171053	2
IV869	Control	13.834	51.274	0.269805	-1.89001	-1.78552	-0.104489	2
IV869	Control	12.364	47.193	0.261988	-1.93243	-1.78552	-0.146907	2
IV869	Control	13.564	54.135	0.250559	-1.99678	-1.78552	-0.211258	2
IV869	Control	13.74	48.524	0.283159	-1.82032	-1.78552	-0.034796	2
IV869	Control	14.118	58.882	0.239768	-2.06029	-1.78552	-0.27477	2
IV869	Control	15.227	53.408	0.285107	-1.81042	-1.78552	-0.0249036	2
IV869	Control	13.228	61.772	0.214142	-2.22336	-1.78552	-0.437838	2
IV869	Control	14.475	49.21	0.294148	-1.76539	-1.78552	0.0201323	2
IV869	Control	13.077	52.429	0.249423	-2.00333	-1.78552	-0.217813	2
IV869	Control	14.797	46.441	0.318619	-1.65009	-1.78552	0.135426	2
IV869	Control	12.713	53.264	0.238679	-2.06686	-1.78552	-0.281336	2
IV869	Control	15.733	54.999	0.28606	-1.80561	-1.78552	-0.0200911	2
IV869	Control	17.333	44.359	0.390744	-1.35571	-1.78552	0.429815	2
IV869	Control	17.404	56.484	0.308123	-1.69842	-1.78552	0.0870972	2
IV869	Control	18.37	68.499	0.268179	-1.89873	-1.78552	-0.113211	2
IV869	Control	14.232	62.404	0.228062	-2.1325	-1.78552	-0.34698	2
IV869	Control	19.519	66.559	0.293259	-1.76975	-1.78552	0.0157659	2
IV869	Control	19.07	51.326	0.371547	-1.42838	-1.78552	0.357136	2
IV869	Control	18.334	53.231	0.344423	-1.53775	-1.78552	0.247775	2
IV869	Control	19.369	54.774	0.353617	-1.49974	-1.78552	0.285779	2
IV869	Control	19.794	66.25	0.298777	-1.74286	-1.78552	0.0426632	2
IV869	Control	20.254	76.349	0.265282	-1.9144	-1.78552	-0.128882	2
IV869	Control	13.994	60.757	0.230327	-2.11824	-1.78552	-0.332722	2
IV869	Control	15.715	63.399	0.247875	-2.01232	-1.78552	-0.226797	2
IV869	Control	16.742	61.474	0.272343	-1.8765	-1.78552	-0.090984	2
IV869	Control	22.237	56.99	0.390191	-1.35775	-1.78552	0.427774	2
IV869	Control	14.903	60.052	0.248168	-2.01061	-1.78552	-0.225089	2
IV869	Control	19.384	67.388	0.287648	-1.79763	-1.78552	-0.0121049	2
IV869	Control	14.568	61.76	0.235881	-2.08387	-1.78552	-0.298349	4
IV869	Control	14.506	51.877	0.279623	-1.83845	-1.78552	-0.0529248	4
IV869	Control	14.167	60.467	0.234293	-2.09361	-1.78552	-0.308093	4
IV869	Control	13.831	59.844	0.231118	-2.1133	-1.78552	-0.327781	4
IV869	Control	15.618	56.007	0.278858	-1.8424	-1.78552	-0.0568769	4
IV869	Control	17.139	62.925	0.272372	-1.87635	-1.78552	-0.0908299	4
IV869	Control	13.308	51.034	0.260767	-1.93916	-1.78552	-0.153644	4
IV869	Control	16.407	74.035	0.221611	-2.1739	-1.78552	-0.388375	4
IV869	Control	14.881	60.112	0.247555	-2.01418	-1.78552	-0.228661	4
IV869	Control	17.547	53.605	0.327339	-1.61114	-1.78552	0.174377	4
IV869	Control	13.79	45.117	0.30565	-1.71005	-1.78552	0.0754718	4
IV869	Control	15.692	51.87	0.302526	-1.72487	-1.78552	0.0606494	4
IV869	Control	17.913	48.422	0.369935	-1.43466	-1.78552	0.350865	4
IV869	Control	20.203	64.62	0.312643	-1.67741	-1.78552	0.108109	4
IV869	Control	18.412	61.951	0.297203	-1.75048	-1.78552	0.0350393	4
IV869	Control	15.284	71.538	0.213649	-2.22669	-1.78552	-0.441167	4
IV869	Control	20.052	83.134	0.241201	-2.05169	-1.78552	-0.266172	4
IV869	Control	22.746	84.573	0.268951	-1.89458	-1.78552	-0.109064	4
IV869	Control	21.137	57.992	0.364481	-1.45608	-1.78552	0.329437	4
IV869	Control	21.024	66.274	0.317228	-1.65641	-1.78552	0.129115	4
IV869	Control	15.281	54.319	0.28132	-1.82972	-1.78552	-0.0441975	4
IV869	Control	19.603	61.802	0.31719	-1.65658	-1.78552	0.128941	4
IV869	Control	21.258	73.839	0.287897	-1.79638	-1.78552	-0.0108566	4
IV869	Control	23.11	63.035	0.366622	-1.44764	-1.78552	0.337885	4
IV869	Control	17.811	66.403	0.268226	-1.89848	-1.78552	-0.112959	4
IV869	Control	17.122	73.043	0.23441	-2.09289	-1.78552	-0.307374	4
IV869	Control	16.164	67.653	0.238925	-2.06537	-1.78552	-0.279849	4
IV869	Control	17.632	74.75	0.23588	-2.08388	-1.78552	-0.298357	4
IV869	Control	20.723	72.781	0.284731	-1.81233	-1.78552	-0.0268085	4
IV869	Control	14.708	58.711	0.250515	-1.99703	-1.78552	-0.211509	6
IV869	Control	14.296	53.063	0.269416	-1.89209	-1.78552	-0.106574	6
IV869	Control	14.784	50.535	0.29255	-1.77325	-1.78552	0.0122742	6
IV869	Control	16.263	71.048	0.228902	-2.1272	-1.78552	-0.34168	6
IV869	Control	18.678	60.011	0.311243	-1.68389	-1.78552	0.101634	6
IV869	Control	16.722	63.322	0.264079	-1.92096	-1.78552	-0.135439	6
IV869	Control	14.824	64.513	0.229783	-2.12166	-1.78552	-0.336135	6
IV869	Control	16.321	62.85	0.259682	-1.94518	-1.78552	-0.159663	6
IV869	Control	15.68	62.423	0.251189	-1.99315	-1.78552	-0.207632	6
IV869	Control	14.293	60.286	0.237087	-2.07651	-1.78552	-0.290994	6
IV869	Control	15.291	55.428	0.275871	-1.85793	-1.78552	-0.0724117	6
IV869	Control	13.338	61.687	0.216221	-2.20942	-1.78552	-0.423904	6
IV869	Control	13.193	55.106	0.239411	-2.06244	-1.78552	-0.276916	6
IV869	Control	14.986	60.768	0.24661	-2.0197	-1.78552	-0.234176	6
IV869	Control	13.487	70.237	0.192021	-2.38066	-1.78552	-0.595141	6
IV869	Control	15.092	49.293	0.306169	-1.7076	-1.78552	0.0779217	6
IV869	Control	12.943	55.647	0.232591	-2.10413	-1.78552	-0.318611	6
IV869	Control	14.93	61.107	0.244326	-2.03312	-1.78552	-0.247603	6
IV869	Control	13.193	55.106	0.239411	-2.06244	-1.78552	-0.276916	6
IV869	Control	14.986	60.768	0.24661	-2.0197	-1.78552	-0.234176	6
IV869	Control	13.487	70.237	0.192021	-2.38066	-1.78552	-0.595141	6
IV869	Control	15.092	49.293	0.306169	-1.7076	-1.78552	0.0779217	6
IV869	Control	12.943	55.647	0.232591	-2.10413	-1.78552	-0.318611	6
IV869	Control	14.93	61.107	0.244326	-2.03312	-1.78552	-0.247603	6
IV869	Control	16.603	64.297	0.258224	-1.95331	-1.78552	-0.167787	6
IV869	Control	18.961	65.567	0.289185	-1.78993	-1.78552	-0.00441433	6
IV869	Control	22.539	86.995	0.259084	-1.94851	-1.78552	-0.162988	6
IV869	Control	22.088	66.776	0.330778	-1.59607	-1.78552	0.189454	6
IV869	Control	20.282	70.608	0.287248	-1.79963	-1.78552	-0.0141112	6
IV869	Control	20.994	85.916	0.244355	-2.03295	-1.78552	-0.247429	6
IV869	Control	17.902	70.446	0.254124	-1.9764	-1.78552	-0.190877	6
IV869	Control	18.625	77.408	0.240608	-2.05524	-1.78552	-0.269722	6
IV869	Control	16.949	70.518	0.24035	-2.05679	-1.78552	-0.271271	6
IV869	Control	20.909	75.808	0.275815	-1.85823	-1.78552	-0.0727055	6
IV869	Control	24.037	70.717	0.339904	-1.5568	-1.78552	0.22872	6
IV869	Control	17.438	74.827	0.233044	-2.10132	-1.78552	-0.315804	6
IV869	Control	20.237	64.957	0.311545	-1.68249	-1.78552	0.103031	6
IV869	Control	16.306	71.462	0.228177	-2.13177	-1.78552	-0.346253	6
IV869	Control	18.381	50.292	0.365486	-1.45211	-1.78552	0.333407	6
IV869	Control	19.822	75.426	0.262801	-1.92796	-1.78552	-0.142439	6
IV869	Control	19.893	63.776	0.31192	-1.68075	-1.78552	0.104768	6
JU1051F	JU1051F	15.779	52.104	0.302837	-1.72339	-1.78552	0.0621322	2
JU1051F	JU1051F	15.009	50.109	0.299527	-1.73924	-1.78552	0.0462786	2
JU1051F	JU1051F	16.425	51.228	0.320625	-1.64104	-1.78552	0.144481	2
JU1051F	JU1051F	16.473	61.678	0.267081	-1.90465	-1.78552	-0.119132	2
JU1051F	JU1051F	18.791	59.863	0.3139	-1.67162	-1.78552	0.113898	2
JU1051F	JU1051F	20.005	55.952	0.357539	-1.48383	-1.78552	0.301691	2
JU1051F	JU1051F	18.237	49.36	0.369469	-1.43647	-1.78552	0.349047	2
JU1051F	JU1051F	13.368	58.148	0.229896	-2.12095	-1.78552	-0.335425	2
JU1051F	JU1051F	17.022	60.016	0.283624	-1.81795	-1.78552	-0.0324261	2
JU1051F	JU1051F	13.186	53.977	0.244289	-2.03334	-1.78552	-0.247817	2
JU1051F	JU1051F	14.164	61.224	0.231347	-2.11187	-1.78552	-0.326348	2
JU1051F	JU1051F	14.229	67.362	0.211232	-2.2431	-1.78552	-0.45758	2
JU1051F	JU1051F	17.848	60.365	0.295668	-1.75795	-1.78552	0.0275706	2
JU1051F	JU1051F	26.91	44.956	0.598585	-0.740371	-1.78552	1.04515	2
JU1051F	JU1051F	18.041	61.833	0.29177	-1.7771	-1.78552	0.00842281	2
JU1051F	JU1051F	16.736	62.659	0.267097	-1.90457	-1.78552	-0.119046	2
JU1051F	JU1051F	18.628	63.041	0.29549	-1.75882	-1.78552	0.0267029	2
JU1051F	JU1051F	17.122	65.466	0.26154	-1.93489	-1.78552	-0.149374	2
JU1051F	JU1051F	20.739	61.881	0.335143	-1.57715	-1.78552	0.20837	2
JU1051F	JU1051F	13.707	46.614	0.294053	-1.76585	-1.78552	0.01967	2
JU1051F	JU1051F	16.562	54.543	0.30365	-1.71952	-1.78552	0.0660034	4
JU1051F	JU1051F	15.654	52.486	0.298251	-1.7454	-1.78552	0.0401192	4
JU1051F	JU1051F	16.53	59.656	0.277089	-1.85158	-1.78552	-0.06606	4
JU1051F	JU1051F	16.567	63.598	0.260496	-1.94067	-1.78552	-0.155149	4
JU1051F	JU1051F	16.565	61.504	0.269332	-1.89254	-1.78552	-0.107022	4
JU1051F	JU1051F	14.665	51.041	0.287318	-1.79928	-1.78552	-0.013759	4
JU1051F	JU1051F	17.776	69.722	0.254955	-1.97168	-1.78552	-0.186163	4
JU1051F	JU1051F	18.747	62.29	0.300963	-1.73234	-1.78552	0.0531797	4
JU1051F	JU1051F	21.425	61.112	0.350586	-1.51216	-1.78552	0.27336	4
JU1051F	JU1051F	13.488	61.297	0.220043	-2.18414	-1.78552	-0.39862	4
JU1051F	JU1051F	15.295	76.899	0.198897	-2.3299	-1.78552	-0.544384	4
JU1051F	JU1051F	15.04	80.584	0.186638	-2.42169	-1.78552	-0.636168	4
JU1051F	JU1051F	19.365	52.528	0.368661	-1.43964	-1.78552	0.345885	4
JU1051F	JU1051F	14.063	58.631	0.239856	-2.05976	-1.78552	-0.274239	4
JU1051F	JU1051F	18.881	68.2	0.276848	-1.85284	-1.78552	-0.0673161	4
JU1051F	JU1051F	20.527	72.146	0.28452	-1.8134	-1.78552	-0.0278761	4
JU1051F	JU1051F	17.745	67.098	0.264464	-1.91886	-1.78552	-0.133337	4
JU1051F	JU1051F	17.891	68.237	0.262189	-1.93132	-1.78552	-0.1458	4
JU1051F	JU1051F	14.67	53.491	0.274252	-1.86643	-1.78552	-0.0809068	4
JU1051F	JU1051F	22.126	66.982	0.330328	-1.59803	-1.78552	0.18749	4
JU1051F	JU1051F	18.436	62.595	0.294528	-1.76352	-1.78552	0.0219988	4
JU1051F	JU1051F	30.318	46.651	0.64989	-0.621733	-1.78552	1.16379	4
JU1051F	JU1051F	18.832	69.904	0.269398	-1.89219	-1.78552	-0.106668	4
JU1051F	JU1051F	16.6	65.918	0.251828	-1.98949	-1.78552	-0.203969	6
JU1051F	JU1051F	17.519	63.455	0.276085	-1.85681	-1.78552	-0.0712929	6
JU1051F	JU1051F	24.355	60.436	0.402988	-1.31119	-1.78552	0.47433	6
JU1051F	JU1051F	15.799	57.96	0.272585	-1.87522	-1.78552	-0.0897038	6
JU1051F	JU1051F	15.902	52.444	0.303219	-1.72157	-1.78552	0.063951	6
JU1051F	JU1051F	15.261	49.073	0.310986	-1.68508	-1.78552	0.100441	6
JU1051F	JU1051F	14.227	49.728	0.286096	-1.80543	-1.78552	-0.0199064	6
JU1051F	JU1051F	16.78	65.941	0.25447	-1.97443	-1.78552	-0.188913	6
JU1051F	JU1051F	16.158	62.506	0.258503	-1.95175	-1.78552	-0.166226	6
JU1051F	JU1051F	18.314	65.445	0.279838	-1.83734	-1.78552	-0.0518155	6
JU1051F	JU1051F	15.22	62.11	0.245049	-2.02886	-1.78552	-0.243337	6
JU1051F	JU1051F	19.46	53.105	0.366444	-1.44834	-1.78552	0.337185	6
JU1051F	JU1051F	14.89	72.028	0.206725	-2.27421	-1.78552	-0.488694	6
JU1051F	JU1051F	13.84	60.432	0.229018	-2.12647	-1.78552	-0.340948	6
JU1051F	JU1051F	14.467	68.618	0.210834	-2.24582	-1.78552	-0.460301	6
JU1051F	JU1051F	19.542	72.266	0.270418	-1.88674	-1.78552	-0.101218	6
JU1051F	JU1051F	30.265	53.552	0.565152	-0.82329	-1.78552	0.96223	6
JU1051F	JU1051F	19.92	70.789	0.2814	-1.82931	-1.78552	-0.043787	6
JU1051F	JU1051F	22.672	81.465	0.278304	-1.84527	-1.78552	-0.0597482	6
JU1051F	JU1051F	19.397	74.012	0.262079	-1.93193	-1.78552	-0.146405	6
JU1051F	JU1051F	18.41	72.265	0.254757	-1.97281	-1.78552	-0.187287	6
JU1051F	JU1051F	23.632	77.186	0.30617	-1.7076	-1.78552	0.077923	6
JU1051F	JU1051F	15.364	58.98	0.260495	-1.94067	-1.78552	-0.155151	6
JU1051M	JU1051M	16.984	60.317	0.281579	-1.82839	-1.78552	-0.0428679	2
JU1051M	JU1051M	17.126	56.482	0.303212	-1.7216	-1.78552	0.0639176	2
JU1051M	JU1051M	16.931	67.919	0.249282	-2.00415	-1.78552	-0.218628	2
JU1051M	JU1051M	20.073	66.069	0.303819	-1.71872	-1.78552	0.0668032	2
JU1051M	JU1051M	17.133	56.548	0.302982	-1.7227	-1.78552	0.0628223	2
JU1051M	JU1051M	18.418	60.027	0.306829	-1.7045	-1.78552	0.0810253	2
JU1051M	JU1051M	14.751	54.898	0.268698	-1.89594	-1.78552	-0.11042	2
JU1051M	JU1051M	19.847	48.868	0.406135	-1.29997	-1.78552	0.485551	2
JU1051M	JU1051M	15.825	61.099	0.259006	-1.94894	-1.78552	-0.163423	2
JU1051M	JU1051M	13.824	52.153	0.265066	-1.91558	-1.78552	-0.130055	2
JU1051M	JU1051M	15.545	56.331	0.275958	-1.85748	-1.78552	-0.071958	2
JU1051M	JU1051M	15.9	53.928	0.294838	-1.76201	-1.78552	0.0235127	2
JU1051M	JU1051M	12.857	46.826	0.27457	-1.86476	-1.78552	-0.0792352	2
JU1051M	JU1051M	16.037	61.89	0.259121	-1.9483	-1.78552	-0.162782	2
JU1051M	JU1051M	18.655	42.404	0.439935	-1.18464	-1.78552	0.600883	2
JU1051M	JU1051M	15.23	59.473	0.256083	-1.96532	-1.78552	-0.179798	2
JU1051M	JU1051M	15.389	73.098	0.210526	-2.24793	-1.78552	-0.462412	2
JU1051M	JU1051M	13.484	72.29	0.186526	-2.42255	-1.78552	-0.637027	2
JU1051M	JU1051M	18.107	71.361	0.253738	-1.97859	-1.78552	-0.193068	2
JU1051M	JU1051M	14.555	64.749	0.224791	-2.15334	-1.78552	-0.367823	2
JU1051M	JU1051M	15.389	61.755	0.249194	-2.00466	-1.78552	-0.219136	2
JU1051M	JU1051M	21.151	61.615	0.343277	-1.54256	-1.78552	0.242965	2
JU1051M	JU1051M	22.524	67.55	0.333442	-1.58449	-1.78552	0.201028	2
JU1051M	JU1051M	18.636	41.203	0.452297	-1.14466	-1.78552	0.640863	2
JU1051M	JU1051M	19.211	63.209	0.303928	-1.7182	-1.78552	0.0673231	4
JU1051M	JU1051M	18.553	66.165	0.280405	-1.83442	-1.78552	-0.0488953	4
JU1051M	JU1051M	16.608	55.393	0.299821	-1.73783	-1.78552	0.0476952	4
JU1051M	JU1051M	19.676	51.576	0.381495	-1.39026	-1.78552	0.395258	4
JU1051M	JU1051M	16.316	64.056	0.254715	-1.97305	-1.78552	-0.187526	4
JU1051M	JU1051M	15.781	61.317	0.257367	-1.9581	-1.78552	-0.172578	4
JU1051M	JU1051M	19.73	76.73	0.257135	-1.9594	-1.78552	-0.173879	4
JU1051M	JU1051M	18.356	57.625	0.318542	-1.65044	-1.78552	0.135077	4
JU1051M	JU1051M	17.847	69.949	0.255143	-1.97062	-1.78552	-0.185101	4
JU1051M	JU1051M	17.252	61.391	0.281018	-1.83126	-1.78552	-0.045743	4
JU1051M	JU1051M	14.454	57.191	0.252732	-1.98432	-1.78552	-0.198799	4
JU1051M	JU1051M	16.216	61.516	0.263606	-1.92354	-1.78552	-0.138023	4
JU1051M	JU1051M	17.46	42.644	0.409436	-1.28829	-1.78552	0.497231	4
JU1051M	JU1051M	13.122	54.759	0.239632	-2.06111	-1.78552	-0.275588	4
JU1051M	JU1051M	16.857	73.668	0.228824	-2.12769	-1.78552	-0.34217	4
JU1051M	JU1051M	16.948	72.276	0.23449	-2.0924	-1.78552	-0.306881	4
JU1051M	JU1051M	15.257	66.214	0.23042	-2.11766	-1.78552	-0.332144	4
JU1051M	JU1051M	18.473	70.976	0.260271	-1.94191	-1.78552	-0.156393	4
JU1051M	JU1051M	22.782	71.326	0.319407	-1.64653	-1.78552	0.138987	4
JU1051M	JU1051M	22.146	52.382	0.422779	-1.24203	-1.78552	0.543496	4
JU1051M	JU1051M	19.224	63.227	0.304047	-1.71763	-1.78552	0.0678883	4
JU1051M	JU1051M	16.833	70.334	0.239329	-2.06293	-1.78552	-0.277409	4
JU1051M	JU1051M	15.708	65.136	0.241157	-2.05196	-1.78552	-0.266435	4
JU1051M	JU1051M	14.502	76.301	0.190063	-2.39545	-1.78552	-0.60993	4
JU1051M	JU1051M	16.724	58.407	0.286336	-1.80422	-1.78552	-0.0187008	6
JU1051M	JU1051M	19.214	64.83	0.296375	-1.7545	-1.78552	0.0310168	6
JU1051M	JU1051M	17.419	56.491	0.30835	-1.69736	-1.78552	0.0881613	6
JU1051M	JU1051M	16.081	64.566	0.249063	-2.00542	-1.78552	-0.219897	6
JU1051M	JU1051M	18.436	54.326	0.339359	-1.55912	-1.78552	0.226403	6
JU1051M	JU1051M	15.752	65.123	0.241881	-2.04763	-1.78552	-0.262112	6
JU1051M	JU1051M	17.238	63.054	0.273385	-1.871	-1.78552	-0.085475	6
JU1051M	JU1051M	18.624	73.5	0.253388	-1.98058	-1.78552	-0.195061	6
JU1051M	JU1051M	19.179	63.173	0.303595	-1.71978	-1.78552	0.0657399	6
JU1051M	JU1051M	17.064	67.969	0.251056	-1.99392	-1.78552	-0.208401	6
JU1051M	JU1051M	17.497	62.282	0.280932	-1.83171	-1.78552	-0.0461872	6
JU1051M	JU1051M	14.796	57.153	0.258884	-1.94962	-1.78552	-0.164102	6
JU1051M	JU1051M	22.123	56.154	0.39397	-1.34384	-1.78552	0.441679	6
JU1051M	JU1051M	22.602	72.859	0.310216	-1.68866	-1.78552	0.0968638	6
JU1051M	JU1051M	24.067	69.739	0.345101	-1.53491	-1.78552	0.250611	6
JU1051M	JU1051M	15.817	73.469	0.215288	-2.21566	-1.78552	-0.430139	6
JU1051M	JU1051M	15.203	81.584	0.186348	-2.42393	-1.78552	-0.63841	6
JU1051M	JU1051M	17.603	70.291	0.25043	-1.99752	-1.78552	-0.211998	6
JU1051M	JU1051M	16.143	70.757	0.228147	-2.13196	-1.78552	-0.346444	6
JU1051M	JU1051M	19.091	69.615	0.274237	-1.86651	-1.78552	-0.080985	6
JU1051M	JU1051M	19.161	75.005	0.255463	-1.96881	-1.78552	-0.183293	6
JU1051M	JU1051M	13.482	52.667	0.255986	-1.96586	-1.78552	-0.180344	6
JU1051M	JU1051M	16.893	67.362	0.250779	-1.99551	-1.78552	-0.209989	6
JU1051M	JU1051M	17.792	53.612	0.331866	-1.59133	-1.78552	0.194193	6
PS312	PS312	27.855	68.632	0.40586	-1.30095	-1.78552	0.484575	2
PS312	PS312	31.553	63.384	0.497807	-1.00634	-1.78552	0.779179	2
PS312	PS312	23.571	81.343	0.289773	-1.78701	-1.78552	-0.00148473	2
PS312	PS312	29.929	64.971	0.460652	-1.11825	-1.78552	0.667269	2
PS312	PS312	21.942	55.965	0.392066	-1.35083	-1.78552	0.434691	2
PS312	PS312	18.55	53.351	0.347697	-1.5241	-1.78552	0.261424	2
PS312	PS312	19.368	53.539	0.361755	-1.46692	-1.78552	0.318605	2
PS312	PS312	23.912	50.97	0.469139	-1.09191	-1.78552	0.693607	2
PS312	PS312	17.044	62.717	0.27176	-1.87959	-1.78552	-0.0940721	2
PS312	PS312	26.88	54.39	0.494208	-1.01681	-1.78552	0.768712	2
PS312	PS312	16.931	63.378	0.267143	-1.90431	-1.78552	-0.118794	2
PS312	PS312	28.902	54.898	0.526467	-0.925584	-1.78552	0.859936	2
PS312	PS312	17.317	60.126	0.288012	-1.7958	-1.78552	-0.0102795	2
PS312	PS312	20.28	59.962	0.338214	-1.56399	-1.78552	0.22153	2
PS312	PS312	25.343	52.752	0.480418	-1.05764	-1.78552	0.727882	2
PS312	PS312	26.549	57.129	0.46472	-1.10557	-1.78552	0.679955	2
PS312	PS312	21.18	60.815	0.348269	-1.52172	-1.78552	0.263796	2
PS312	PS312	29.392	77.506	0.379222	-1.39888	-1.78552	0.386636	2
PS312	PS312	32.053	63.137	0.507674	-0.978026	-1.78552	0.807494	2
PS312	PS312	19.742	69.992	0.282061	-1.82592	-1.78552	-0.0404014	2
PS312	PS312	15.808	58.295	0.271172	-1.88272	-1.78552	-0.0971968	2
PS312	PS312	16.892	69.796	0.24202	-2.0468	-1.78552	-0.261284	2
PS312	PS312	19.661	73.142	0.268806	-1.89536	-1.78552	-0.109843	2
PS312	PS312	19.051	66.204	0.287762	-1.79705	-1.78552	-0.0115312	2
PS312	PS312	18.002	74.252	0.242445	-2.04427	-1.78552	-0.258752	2
PS312	PS312	16.527	78.624	0.210203	-2.25014	-1.78552	-0.464624	2
PS312	PS312	37.065	69.741	0.531466	-0.91195	-1.78552	0.873571	4
PS312	PS312	48.021	70.757	0.678675	-0.559207	-1.78552	1.22631	4
PS312	PS312	32.471	49.486	0.656165	-0.607869	-1.78552	1.17765	4
PS312	PS312	20.648	56.727	0.363989	-1.45803	-1.78552	0.327487	4
PS312	PS312	35.841	69.815	0.513371	-0.961926	-1.78552	0.823594	4
PS312	PS312	36.052	76.038	0.474131	-1.07664	-1.78552	0.708879	4
PS312	PS312	47.427	68.264	0.694759	-0.525416	-1.78552	1.2601	4
PS312	PS312	47.421	58.118	0.815943	-0.293459	-1.78552	1.49206	4
PS312	PS312	17.602	62.395	0.282106	-1.82569	-1.78552	-0.0401706	4
PS312	PS312	27.4	57.036	0.480398	-1.0577	-1.78552	0.727824	4
PS312	PS312	45.112	55.179	0.817557	-0.290608	-1.78552	1.49491	4
PS312	PS312	47.263	63.821	0.740556	-0.43332	-1.78552	1.3522	4
PS312	PS312	45.523	56.03	0.812475	-0.299604	-1.78552	1.48592	4
PS312	PS312	38.047	62.786	0.605979	-0.72266	-1.78552	1.06286	4
PS312	PS312	22.018	67.505	0.326168	-1.61631	-1.78552	0.16921	4
PS312	PS312	33.915	73.343	0.462416	-1.11274	-1.78552	0.672785	4
PS312	PS312	50.474	64.489	0.782676	-0.353513	-1.78552	1.43201	4
PS312	PS312	28.603	69.118	0.413829	-1.2729	-1.78552	0.512626	4
PS312	PS312	30.139	80.132	0.376117	-1.41075	-1.78552	0.374774	4
PS312	PS312	24.713	88.398	0.279565	-1.83874	-1.78552	-0.0532231	4
PS312	PS312	36.655	76.835	0.477061	-1.06775	-1.78552	0.717767	4
PS312	PS312	45.731	76.732	0.595983	-0.746656	-1.78552	1.03886	4
PS312	PS312	54.779	72.474	0.755843	-0.403841	-1.78552	1.38168	4
PS312	PS312	22.768	64.865	0.351006	-1.51043	-1.78552	0.275088	4
PS312	PS312	38.761	86.763	0.446746	-1.16247	-1.78552	0.623046	4
PS312	PS312	22.206	71.951	0.308627	-1.69607	-1.78552	0.0894553	4
PS312	PS312	57.195	62.108	0.920896	-0.11889	-1.78552	1.66663	6
PS312	PS312	55.451	63.117	0.878543	-0.186815	-1.78552	1.59871	6
PS312	PS312	46.449	85.138	0.545573	-0.874156	-1.78552	0.911365	6
PS312	PS312	37.065	62.304	0.594906	-0.749267	-1.78552	1.03625	6
PS312	PS312	51.528	57.257	0.899942	-0.152095	-1.78552	1.63343	6
PS312	PS312	48.197	57.335	0.840621	-0.250473	-1.78552	1.53505	6
PS312	PS312	61.897	68.875	0.898686	-0.154111	-1.78552	1.63141	6
PS312	PS312	45.067	64.861	0.694824	-0.52528	-1.78552	1.26024	6
PS312	PS312	51.972	62.46	0.832085	-0.265198	-1.78552	1.52032	6
PS312	PS312	55.554	63.252	0.878296	-0.18722	-1.78552	1.5983	6
PS312	PS312	25.445	64.702	0.393265	-1.34643	-1.78552	0.439092	6
PS312	PS312	58.118	66.421	0.874994	-0.192654	-1.78552	1.59287	6
PS312	PS312	63.137	64.914	0.972625	-0.0400439	-1.78552	1.74548	6
PS312	PS312	45.89	64.876	0.707349	-0.499505	-1.78552	1.28602	6
PS312	PS312	43.231	69.152	0.625159	-0.677705	-1.78552	1.10782	6
PS312	PS312	31.608	73.641	0.429217	-1.22022	-1.78552	0.565301	6
PS312	PS312	53.564	60.919	0.879266	-0.185629	-1.78552	1.59989	6
PS312	PS312	34.321	84.219	0.407521	-1.29505	-1.78552	0.490466	6
PS312	PS312	42.253	68.049	0.62092	-0.68752	-1.78552	1.098	6
PS312	PS312	43.328	78.497	0.55197	-0.857338	-1.78552	0.928183	6
PS312	PS312	61.904	85.009	0.728205	-0.457583	-1.78552	1.32794	6
PS312	PS312	50.343	67.343	0.747561	-0.419737	-1.78552	1.36578	6
PS312	PS312	43.179	74.157	0.582265	-0.780253	-1.78552	1.00527	6
PS312	PS312	56.539	83.501	0.677106	-0.562547	-1.78552	1.22297	6
PS312	PS312	68.384	76.781	0.890637	-0.167091	-1.78552	1.61843	6
PS312	PS312	52.916	78.695	0.672419	-0.572568	-1.78552	1.21295	6
RS5194	RS5194	26.978	63.639	0.423922	-1.23813	-1.78552	0.547393	2
RS5194	RS5194	28.962	47.448	0.610395	-0.712186	-1.78552	1.07333	2
RS5194	RS5194	34.743	68.919	0.504114	-0.988179	-1.78552	0.797341	2
RS5194	RS5194	30.753	68.529	0.448759	-1.15599	-1.78552	0.629533	2
RS5194	RS5194	29.261	55.772	0.524654	-0.930562	-1.78552	0.854959	2
RS5194	RS5194	31.537	69.061	0.456654	-1.13083	-1.78552	0.654695	2
RS5194	RS5194	31.192	63.617	0.490309	-1.02824	-1.78552	0.757284	2
RS5194	RS5194	25.621	60.815	0.421294	-1.2471	-1.78552	0.53842	2
RS5194	RS5194	33.133	62.077	0.53374	-0.90579	-1.78552	0.879731	2
RS5194	RS5194	31.016	55.062	0.563292	-0.828044	-1.78552	0.957476	2
RS5194	RS5194	18.162	57.626	0.31517	-1.6658	-1.78552	0.119724	2
RS5194	RS5194	27.836	53.962	0.515844	-0.954992	-1.78552	0.830529	2
RS5194	RS5194	27.064	64.702	0.418287	-1.25744	-1.78552	0.528085	2
RS5194	RS5194	27.696	57.051	0.48546	-1.04257	-1.78552	0.742946	2
RS5194	RS5194	23.35	56.31	0.414669	-1.26997	-1.78552	0.515552	2
RS5194	RS5194	26.897	65.997	0.407549	-1.29496	-1.78552	0.490565	2
RS5194	RS5194	19.746	57.349	0.344313	-1.53821	-1.78552	0.247313	2
RS5194	RS5194	28.916	63.265	0.457062	-1.12954	-1.78552	0.655981	2
RS5194	RS5194	31.124	71.33	0.436338	-1.19648	-1.78552	0.589039	2
RS5194	RS5194	30.891	55.122	0.560411	-0.835442	-1.78552	0.950079	2
RS5194	RS5194	27.786	79.561	0.349241	-1.5177	-1.78552	0.267817	2
RS5194	RS5194	26.299	84.184	0.312399	-1.67854	-1.78552	0.106982	2
RS5194	RS5194	23.928	46.058	0.519519	-0.944752	-1.78552	0.840769	2
RS5194	RS5194	26.677	52.14	0.511642	-0.966794	-1.78552	0.818726	2
RS5194	RS5194	23.168	60.465	0.383164	-1.38397	-1.78552	0.401554	2
RS5194	RS5194	25.203	62.828	0.401143	-1.31781	-1.78552	0.467708	2
RS5194	RS5194	60.308	76.688	0.786407	-0.346651	-1.78552	1.43887	4
RS5194	RS5194	55.764	72.09	0.773533	-0.370465	-1.78552	1.41506	4
RS5194	RS5194	60.805	71.206	0.853931	-0.227809	-1.78552	1.55771	4
RS5194	RS5194	54.748	70.172	0.780197	-0.358089	-1.78552	1.42743	4
RS5194	RS5194	62.14	72.434	0.857884	-0.221145	-1.78552	1.56438	4
RS5194	RS5194	53.467	50.316	1.06262	0.0876315	-1.78552	1.87315	4
RS5194	RS5194	46	73.878	0.622648	-0.683511	-1.78552	1.10201	4
RS5194	RS5194	51.378	57.26	0.897276	-0.156377	-1.78552	1.62914	4
RS5194	RS5194	54.334	75.62	0.718514	-0.476913	-1.78552	1.30861	4
RS5194	RS5194	52.853	58.93	0.896878	-0.157017	-1.78552	1.6285	4
RS5194	RS5194	39.29	54.942	0.715118	-0.483747	-1.78552	1.30177	4
RS5194	RS5194	49.172	67.564	0.727784	-0.458418	-1.78552	1.3271	4
RS5194	RS5194	36.892	57.629	0.640164	-0.643487	-1.78552	1.14203	4
RS5194	RS5194	53.05	62.608	0.847336	-0.238994	-1.78552	1.54653	4
RS5194	RS5194	25.383	59.701	0.425169	-1.23389	-1.78552	0.551628	4
RS5194	RS5194	50.316	56.325	0.893316	-0.162758	-1.78552	1.62276	4
RS5194	RS5194	46.652	69.18	0.674357	-0.568416	-1.78552	1.2171	4
RS5194	RS5194	49.581	56.829	0.872459	-0.19684	-1.78552	1.58868	4
RS5194	RS5194	51.022	54.317	0.939338	-0.0902843	-1.78552	1.69524	4
RS5194	RS5194	44.368	66.449	0.6677	-0.582728	-1.78552	1.20279	4
RS5194	RS5194	56.957	78.834	0.722493	-0.468945	-1.78552	1.31658	4
RS5194	RS5194	58.011	85.761	0.676426	-0.563995	-1.78552	1.22153	4
RS5194	RS5194	39.984	49.268	0.811561	-0.301228	-1.78552	1.48429	4
RS5194	RS5194	54.002	85.746	0.62979	-0.667057	-1.78552	1.11846	4
RS5194	RS5194	61.256	70.849	0.864599	-0.209896	-1.78552	1.57562	6
RS5194	RS5194	58.644	63.141	0.928778	-0.106594	-1.78552	1.67893	6
RS5194	RS5194	69.133	68.531	1.00878	0.0126178	-1.78552	1.79814	6
RS5194	RS5194	53.357	74.212	0.718981	-0.475975	-1.78552	1.30955	6
RS5194	RS5194	77.972	59.281	1.31529	0.395386	-1.78552	2.18091	6
RS5194	RS5194	67.523	75.288	0.896863	-0.157041	-1.78552	1.62848	6
RS5194	RS5194	72.848	71.88	1.01347	0.019299	-1.78552	1.80482	6
RS5194	RS5194	76.824	85.507	0.898453	-0.154485	-1.78552	1.63104	6
RS5194	RS5194	67.602	63.088	1.07155	0.0997003	-1.78552	1.88522	6
RS5194	RS5194	57.266	57.27	0.99993	-0.000100768	-1.78552	1.78542	6
RS5194	RS5194	35.801	64.418	0.555761	-0.847464	-1.78552	0.938057	6
RS5194	RS5194	61.45	63.276	0.971142	-0.0422454	-1.78552	1.74328	6
RS5194	RS5194	68.833	68.578	1.00372	0.00535456	-1.78552	1.79088	6
RS5194	RS5194	58.497	64.308	0.909638	-0.136636	-1.78552	1.64888	6
RS5194	RS5194	45.787	62.398	0.73379	-0.446562	-1.78552	1.33896	6
RS5194	RS5194	61.202	69.327	0.882802	-0.179839	-1.78552	1.60568	6
RS5194	RS5194	73.615	71.26	1.03305	0.0469073	-1.78552	1.83243	6
RS5194	RS5194	57.227	75.026	0.762762	-0.390695	-1.78552	1.39483	6
RS5194	RS5194	86.911	89.04	0.976089	-0.0349148	-1.78552	1.75061	6
RS5194	RS5194	72.392	63.297	1.14369	0.193693	-1.78552	1.97921	6
RS5194	RS5194	60.395	80.683	0.748547	-0.417836	-1.78552	1.36768	6
RS5194	RS5194	65.508	81.639	0.802411	-0.317587	-1.78552	1.46793	6
RS5194	RS5194	60.57	60.261	1.00513	0.0073788	-1.78552	1.7929	6
stab	stab	41.753	58.114	0.718467	-0.477006	-1.78552	1.30851	2
stab	stab	34.684	70.332	0.493147	-1.01991	-1.78552	0.76561	2
stab	stab	40.346	71.388	0.565165	-0.823256	-1.78552	0.962265	2
stab	stab	38.421	43.916	0.874875	-0.192852	-1.78552	1.59267	2
stab	stab	17.929	51.627	0.34728	-1.52583	-1.78552	0.25969	2
stab	stab	31.233	51.04	0.611932	-0.708557	-1.78552	1.07696	2
stab	stab	33.587	47.635	0.705091	-0.504119	-1.78552	1.2814	2
stab	stab	33.892	60.97	0.55588	-0.847155	-1.78552	0.938366	2
stab	stab	35.501	60.658	0.585265	-0.772838	-1.78552	1.01268	2
stab	stab	36.321	62.789	0.578461	-0.789708	-1.78552	0.995813	2
stab	stab	18.532	56.973	0.325277	-1.62026	-1.78552	0.165261	2
stab	stab	37.414	60.869	0.614664	-0.702129	-1.78552	1.08339	2
stab	stab	19.587	58.38	0.335509	-1.57558	-1.78552	0.209943	2
stab	stab	18.732	47.496	0.394391	-1.3423	-1.78552	0.443219	2
stab	stab	20.512	61.575	0.333122	-1.58588	-1.78552	0.199644	2
stab	stab	21.474	73.032	0.294035	-1.76594	-1.78552	0.0195827	2
stab	stab	21.053	84.082	0.250387	-1.99777	-1.78552	-0.212251	2
stab	stab	19.273	58.502	0.329442	-1.6019	-1.78552	0.183616	2
stab	stab	19.77	51.128	0.386677	-1.3708	-1.78552	0.41472	2
stab	stab	24.126	66.454	0.363048	-1.46177	-1.78552	0.323753	2
stab	stab	13.494	52.797	0.255583	-1.96814	-1.78552	-0.182617	2
stab	stab	19.878	51.513	0.385883	-1.37376	-1.78552	0.411757	2
stab	stab	23.647	56.515	0.41842	-1.25698	-1.78552	0.528544	2
stab	stab	24.985	84.353	0.296196	-1.75538	-1.78552	0.0301433	2
stab	stab	19.449	54.623	0.356059	-1.48981	-1.78552	0.295708	2
stab	stab	19.458	48.937	0.397613	-1.33056	-1.78552	0.454958	2
stab	stab	19.245	53.325	0.3609	-1.47033	-1.78552	0.315192	2
stab	stab	20.859	59.151	0.35264	-1.50373	-1.78552	0.281788	2
stab	stab	18.877	64.953	0.290626	-1.78277	-1.78552	0.00275385	2
stab	stab	25.164	66.476	0.378543	-1.40147	-1.78552	0.384048	2
stab	stab	17.042	61.586	0.276719	-1.85351	-1.78552	-0.0679873	2
stab	stab	26.383	71.011	0.371534	-1.42843	-1.78552	0.357087	2
stab	stab	26.906	67.64	0.397782	-1.32995	-1.78552	0.455572	2
stab	stab	33.185	64.329	0.515864	-0.954938	-1.78552	0.830583	2
stab	stab	18.671	65.849	0.283543	-1.81836	-1.78552	-0.0328418	2
stab	stab	24.15	72.453	0.33332	-1.58502	-1.78552	0.200498	2
stab	stab	22.919	52.723	0.434706	-1.20189	-1.78552	0.583632	2
stab	stab	24.704	74.984	0.329457	-1.60184	-1.78552	0.183682	2
stab	stab	21.016	73.314	0.286657	-1.8026	-1.78552	-0.0170801	2
stab	stab	24.465	75.494	0.324065	-1.62564	-1.78552	0.159878	2
stab	stab	19.417	67.92	0.28588	-1.80652	-1.78552	-0.0209956	2
stab	stab	19.06	64.662	0.294764	-1.76237	-1.78552	0.0231505	2
stab	stab	18.975	58.643	0.323568	-1.62786	-1.78552	0.157661	2
stab	stab	23.574	58.98	0.399695	-1.32303	-1.78552	0.462491	2
stab	stab	23.223	63.033	0.368426	-1.44055	-1.78552	0.344968	2
stab	stab	19.45	70.244	0.276892	-1.8526	-1.78552	-0.0670843	2
stab	stab	22.073	68.072	0.32426	-1.62478	-1.78552	0.160742	2
stab	stab	32.829	61.962	0.529825	-0.916413	-1.78552	0.869108	2
stab	stab	19.043	56.608	0.336401	-1.57175	-1.78552	0.213775	2
stab	stab	24.532	76.9	0.319012	-1.64832	-1.78552	0.137202	2
stab	stab	23.837	64.053	0.372145	-1.42606	-1.78552	0.359457	2
stab	stab	16.782	59.365	0.282692	-1.8227	-1.78552	-0.0371774	2
stab	stab	17.427	56.129	0.310481	-1.68742	-1.78552	0.0980984	4
stab	stab	65.826	85.291	0.771781	-0.373736	-1.78552	1.41178	4
stab	stab	56.166	85.436	0.657404	-0.605147	-1.78552	1.18037	4
stab	stab	45.889	43.413	1.05703	0.0800212	-1.78552	1.86554	4
stab	stab	48.192	58.959	0.817382	-0.290918	-1.78552	1.4946	4
stab	stab	54.771	57.186	0.957769	-0.0622498	-1.78552	1.72327	4
stab	stab	19.819	63.386	0.312672	-1.67728	-1.78552	0.10824	4
stab	stab	47.214	62.227	0.758738	-0.398326	-1.78552	1.38719	4
stab	stab	48.995	53.552	0.914905	-0.128306	-1.78552	1.65721	4
stab	stab	44.453	53.077	0.837519	-0.255806	-1.78552	1.52971	4
stab	stab	47.291	67.129	0.704479	-0.505371	-1.78552	1.28015	4
stab	stab	50.854	56.819	0.895018	-0.160012	-1.78552	1.62551	4
stab	stab	20.103	49.479	0.406294	-1.29941	-1.78552	0.486115	4
stab	stab	20.712	67.142	0.308481	-1.69675	-1.78552	0.0887719	4
stab	stab	23.827	54.124	0.44023	-1.18367	-1.78552	0.601849	4
stab	stab	24.046	61.875	0.388622	-1.36356	-1.78552	0.421961	4
stab	stab	23.725	62.364	0.380428	-1.39431	-1.78552	0.391215	4
stab	stab	32.704	78.971	0.414127	-1.27186	-1.78552	0.513665	4
stab	stab	23.02	66.863	0.344286	-1.53832	-1.78552	0.2472	4
stab	stab	26.736	84.736	0.315521	-1.66419	-1.78552	0.121329	4
stab	stab	25.515	58.358	0.437215	-1.19358	-1.78552	0.591936	4
stab	stab	25.806	69.093	0.373497	-1.42083	-1.78552	0.364687	4
stab	stab	24.519	72.894	0.336365	-1.5719	-1.78552	0.213621	4
stab	stab	30.43	69.579	0.437345	-1.19316	-1.78552	0.592363	4
stab	stab	27.967	61.531	0.454519	-1.13759	-1.78552	0.647933	4
stab	stab	23.799	56.418	0.421833	-1.24525	-1.78552	0.540266	4
stab	stab	32.305	67.636	0.47763	-1.06603	-1.78552	0.719487	4
stab	stab	24.457	55.661	0.439392	-1.18642	-1.78552	0.599101	4
stab	stab	14.788	66.433	0.2226	-2.16747	-1.78552	-0.381953	4
stab	stab	28.715	64.839	0.442866	-1.17506	-1.78552	0.610463	4
stab	stab	21.159	69.55	0.304227	-1.71678	-1.78552	0.0687414	4
stab	stab	23.434	72.14	0.324841	-1.6222	-1.78552	0.163324	4
stab	stab	23.689	71.719	0.330303	-1.59814	-1.78552	0.187382	4
stab	stab	22.2	65.475	0.339061	-1.56038	-1.78552	0.225136	4
stab	stab	26.075	59.471	0.438449	-1.18952	-1.78552	0.596001	4
stab	stab	34.962	65.172	0.536457	-0.898465	-1.78552	0.887056	4
stab	stab	26.323	82.304	0.319826	-1.64464	-1.78552	0.140882	4
stab	stab	28.618	72.382	0.395375	-1.33871	-1.78552	0.446812	4
stab	stab	33.627	79.025	0.425524	-1.23269	-1.78552	0.552831	4
stab	stab	21.442	72.594	0.295369	-1.75941	-1.78552	0.0261097	4
stab	stab	32.488	75.76	0.428828	-1.22153	-1.78552	0.563991	4
stab	stab	21.289	58.296	0.365188	-1.45329	-1.78552	0.332232	6
stab	stab	49.809	53.869	0.924632	-0.113049	-1.78552	1.67247	6
stab	stab	41.359	57.758	0.716074	-0.481819	-1.78552	1.3037	6
stab	stab	50.134	59.502	0.84256	-0.247149	-1.78552	1.53837	6
stab	stab	62.186	68.421	0.908873	-0.137849	-1.78552	1.64767	6
stab	stab	49.87	50.449	0.988523	-0.0166535	-1.78552	1.76887	6
stab	stab	49.856	57.233	0.871106	-0.19908	-1.78552	1.58644	6
stab	stab	15.997	52.522	0.304577	-1.71512	-1.78552	0.0704	6
stab	stab	54.617	72.538	0.752943	-0.409387	-1.78552	1.37613	6
stab	stab	66.716	75.632	0.882113	-0.180964	-1.78552	1.60456	6
stab	stab	44.838	41.756	1.07381	0.102738	-1.78552	1.88826	6
stab	stab	60.805	57.409	1.05915	0.082913	-1.78552	1.86843	6
stab	stab	14.596	56.617	0.257802	-1.95566	-1.78552	-0.170142	6
stab	stab	28.272	62.776	0.450363	-1.15084	-1.78552	0.634681	6
stab	stab	33.355	77.49	0.430443	-1.21611	-1.78552	0.569413	6
stab	stab	26.806	64.759	0.413935	-1.27252	-1.78552	0.512996	6
stab	stab	23.126	59.589	0.388092	-1.36553	-1.78552	0.41999	6
stab	stab	28.261	67.785	0.416921	-1.26215	-1.78552	0.523367	6
stab	stab	21.493	68.523	0.313661	-1.67272	-1.78552	0.112799	6
stab	stab	24.16	67.294	0.359022	-1.47786	-1.78552	0.307663	6
stab	stab	22.506	70.501	0.31923	-1.64733	-1.78552	0.138186	6
stab	stab	25.051	62.368	0.401664	-1.31594	-1.78552	0.469583	6
stab	stab	23.537	71.429	0.329516	-1.60158	-1.78552	0.183941	6
stab	stab	20.703	75.391	0.274608	-1.86455	-1.78552	-0.079032	6
stab	stab	21.995	60.583	0.363056	-1.46174	-1.78552	0.323783	6
stab	stab	23.096	72.806	0.317227	-1.65641	-1.78552	0.129106	6
stab	stab	24.209	60.166	0.40237	-1.3134	-1.78552	0.472116	6
stab	stab	30.2	73.327	0.411854	-1.2798	-1.78552	0.505725	6
stab	stab	24.991	70.657	0.353695	-1.49942	-1.78552	0.286097	6
stab	stab	35.322	84.782	0.416621	-1.26319	-1.78552	0.52233	6
stab	stab	34.134	62.136	0.549343	-0.86422	-1.78552	0.921301	6
stab	stab	32.454	76.109	0.426415	-1.22967	-1.78552	0.55585	6
stab	stab	30.15	80.237	0.375762	-1.41211	-1.78552	0.373411	6
stab	stab	28.155	91.749	0.30687	-1.7043	-1.78552	0.0812192	6
stab	stab	23.027	82.283	0.279851	-1.83727	-1.78552	-0.0517474	6
stab	stab	29.746	60.015	0.495643	-1.01263	-1.78552	0.772893	6
stab	stab	18.039	63.093	0.285911	-1.80636	-1.78552	-0.0208401	6
stab	stab	20.128	57.992	0.347082	-1.52665	-1.78552	0.25887	6
stab	stab	27.214	71.201	0.382214	-1.38755	-1.78552	0.397972	6
stab	stab	27.774	81.601	0.340363	-1.55485	-1.78552	0.230669	6
stab	stab	24.815	67.991	0.364975	-1.45413	-1.78552	0.331389	6
stab	stab	21.474	70.799	0.303309	-1.72114	-1.78552	0.0643825	6
stab	stab	21.723	80.431	0.270082	-1.88853	-1.78552	-0.103008	6
stab	stab	21.387	76.9	0.278114	-1.84625	-1.78552	-0.060729	6
stab	stab	26.044	69.793	0.373161	-1.42213	-1.78552	0.363389	6
stab	stab	22.416	69.267	0.323617	-1.62764	-1.78552	0.157881	6
stab	stab	26.823	65.051	0.412338	-1.2781	-1.78552	0.50742	6
