# Supplementary material for: Dopamine signaling regulates predator-driven changes in Caenorhabditis elegans’ egg laying behavior
Source: eLife. 2023 Jul 11;12:e83957. doi: 10.7554/eLife.83957 (PMC10335835; doi:10.7554/eLife.83957)
Supplement: Figure 1—figure supplement 5—source data 1. — For each test arena, data tabulate the arena, ratio of predator:prey, <x,y> coordinates in pixels, lawn radius in pixels, the egg distance from arena center in pixels, the egg distance from lawn edge in pixels, position as 1 (off) or 0 (on) lawn, the conversion factor for pixel data in mm-per-pixel, the calculated distance from center in mm, the calculated distance from the lawn edge in mm. [file elife-83957-fig1-figsupp5-data1.xlsx]

## Sheet: Figure1-S2A-B
Arena	PredatorNumber	CElegansNumber	Ratio	X	Y	LawnRadius	DistCenterPx	DistEdgePx	off	PxScale	DistCenterMm	DistEdgeMm
00000001_8.tif	3	3	3:3	9.76	2.802	4.90112	10.0532	5.1521	1	0.29777	2.99355	1.53414
00000001_8.tif	3	3	3:3	9.432	5.457	4.90112	8.20365	3.30254	1	0.29777	2.4428	0.983396
00000001_8.tif	3	3	3:3	9.432	5.845	4.90112	7.93721	3.0361	1	0.29777	2.36346	0.904058
00000001_8.tif	3	3	3:3	8.439	5.741	4.90112	8.76108	3.85996	1	0.29777	2.60879	1.14938
00000001_8.tif	3	3	3:3	7.689	5.957	4.90112	9.23566	4.33454	1	0.29777	2.7501	1.2907
00000001_8.tif	3	3	3:3	7.03	5.936	4.90112	9.7969	4.89579	1	0.29777	2.91722	1.45782
00000001_8.tif	3	3	3:3	6.738	6.609	4.90112	9.70925	4.80813	1	0.29777	2.89112	1.43172
00000001_8.tif	3	3	3:3	6.092	10.102	4.90112	9.26943	4.36831	1	0.29777	2.76016	1.30075
00000001_8.tif	3	3	3:3	6.516	11.88	4.90112	8.80783	3.90672	1	0.29777	2.62271	1.1633
00000001_8.tif	3	3	3:3	7.557	11.769	4.90112	7.7614	2.86029	1	0.29777	2.31111	0.851708
00000001_8.tif	3	3	3:3	7.731	11.915	4.90112	7.60037	2.69926	1	0.29777	2.26316	0.803757
00000001_8.tif	3	3	3:3	7.745	12.047	4.90112	7.60013	2.69902	1	0.29777	2.26309	0.803686
00000001_8.tif	3	3	3:3	7.898	12.234	4.90112	7.47187	2.57076	1	0.29777	2.2249	0.765494
00000001_8.tif	3	3	3:3	6.62	14.165	4.90112	9.17187	4.27075	1	0.29777	2.73111	1.2717
00000001_8.tif	3	3	3:3	5.905	14.62	4.90112	9.9977	5.09658	1	0.29777	2.97701	1.51761
00000001_8.tif	3	3	3:3	6.391	14.602	4.90112	9.53615	4.63503	1	0.29777	2.83958	1.38017
00000001_8.tif	3	3	3:3	6.502	14.901	4.90112	9.5447	4.64358	1	0.29777	2.84213	1.38272
00000001_8.tif	3	3	3:3	9.981	14.29	4.90112	6.15234	1.25122	1	0.29777	1.83198	0.372576
00000001_8.tif	3	3	3:3	10.148	13.602	4.90112	5.68467	0.783555	1	0.29777	1.69272	0.233319
00000001_8.tif	3	3	3:3	8.55	15.196	4.90112	7.84513	2.94401	1	0.29777	2.33604	0.876638
00000001_8.tif	3	3	3:3	6.418	15.391	4.90112	9.8214	4.92028	1	0.29777	2.92452	1.46511
00000001_8.tif	3	3	3:3	6.62	15.502	4.90112	9.68802	4.78691	1	0.29777	2.8848	1.4254
00000001_8.tif	3	3	3:3	6.613	15.752	4.90112	9.80797	4.90686	1	0.29777	2.92052	1.46111
00000001_8.tif	3	3	3:3	6.71	15.905	4.90112	9.79487	4.89376	1	0.29777	2.91662	1.45721
00000001_8.tif	3	3	3:3	9.384	16.641	4.90112	8.04017	3.13905	1	0.29777	2.39412	0.934715
00000001_8.tif	3	3	3:3	8.391	17.766	4.90112	9.534	4.63288	1	0.29777	2.83894	1.37953
00000001_8.tif	3	3	3:3	8.627	17.759	4.90112	9.35955	4.45844	1	0.29777	2.78699	1.32759
00000001_8.tif	3	3	3:3	9.474	19.148	4.90112	9.85847	4.95735	1	0.29777	2.93556	1.47615
00000001_8.tif	3	3	3:3	9.835	19.043	4.90112	9.56326	4.66214	1	0.29777	2.84765	1.38825
00000001_8.tif	3	3	3:3	14.894	20.599	4.90112	9.41463	4.51351	1	0.29777	2.80339	1.34399
00000001_8.tif	3	3	3:3	14.54	20.418	4.90112	9.25601	4.35489	1	0.29777	2.75616	1.29676
00000001_8.tif	3	3	3:3	13.359	20.467	4.90112	9.47433	4.57321	1	0.29777	2.82117	1.36177
00000001_8.tif	3	3	3:3	10.602	18.467	4.90112	8.6576	3.75649	1	0.29777	2.57797	1.11857
00000001_8.tif	3	3	3:3	10.762	18.363	4.90112	8.48382	3.5827	1	0.29777	2.52623	1.06682
00000001_8.tif	3	3	3:3	11.436	19.12	4.90112	8.81729	3.91618	1	0.29777	2.62553	1.16612
00000001_8.tif	3	3	3:3	11.401	17.884	4.90112	7.74263	2.84151	1	0.29777	2.30552	0.846117
00000001_8.tif	3	3	3:3	11.957	17.849	4.90112	7.44701	2.54589	1	0.29777	2.2175	0.75809
00000001_8.tif	3	3	3:3	11.922	18.078	4.90112	7.66771	2.7666	1	0.29777	2.28322	0.82381
00000001_8.tif	3	3	3:3	12.311	16.62	4.90112	6.19423	1.29312	1	0.29777	1.84446	0.385052
00000001_8.tif	3	3	3:3	12.436	16.175	4.90112	5.74505	0.843938	1	0.29777	1.7107	0.251299
00000001_8.tif	3	3	3:3	12.415	16.391	4.90112	5.94349	1.04238	1	0.29777	1.76979	0.310389
00000001_8.tif	3	3	3:3	13.415	16.731	4.90112	5.84905	0.947933	1	0.29777	1.74167	0.282266
00000001_8.tif	3	3	3:3	14.165	16.411	4.90112	5.33938	0.438261	1	0.29777	1.58991	0.130501
00000001_8.tif	3	3	3:3	14.373	16.46	4.90112	5.34744	0.446319	1	0.29777	1.59231	0.132901
00000001_8.tif	3	3	3:3	13.269	15.71	4.90112	4.95137	0.0502549	1	0.29777	1.47437	0.0149644
00000001_8.tif	3	3	3:3	13.283	15.106	4.90112	4.40088	-0.500234	0	0.29777	1.31045	-0.148955
00000001_8.tif	3	3	3:3	13.7	13.696	4.90112	2.96908	-1.93204	0	0.29777	0.884102	-0.575303
00000001_8.tif	3	3	3:3	10.436	14.835	4.90112	6.074	1.17288	1	0.29777	1.80866	0.34925
00000001_8.tif	3	3	3:3	10.998	14.141	4.90112	5.21269	0.311571	1	0.29777	1.55218	0.0927765
00000001_8.tif	3	3	3:3	11.762	9.922	4.90112	3.75655	-1.14457	0	0.29777	1.11859	-0.340817
00000001_8.tif	3	3	3:3	11.609	9.609	4.90112	4.01378	-0.88734	0	0.29777	1.19518	-0.264223
00000001_8.tif	3	3	3:3	11.79	8.776	4.90112	4.25922	-0.641898	0	0.29777	1.26827	-0.191138
00000001_8.tif	3	3	3:3	13.026	8.033	4.90112	3.89141	-1.00971	0	0.29777	1.15874	-0.300661
00000001_8.tif	3	3	3:3	13.082	7.859	4.90112	4.00272	-0.898394	0	0.29777	1.19189	-0.267515
00000001_8.tif	3	3	3:3	10.97	5.748	4.90112	6.95492	2.05381	1	0.29777	2.07097	0.611562
00000001_8.tif	3	3	3:3	13.665	4.589	4.90112	6.80266	1.90155	1	0.29777	2.02563	0.566224
00000001_8.tif	3	3	3:3	11.033	3.283	4.90112	8.98609	4.08497	1	0.29777	2.67579	1.21638
00000001_8.tif	3	3	3:3	11.45	3.401	4.90112	8.68992	3.7888	1	0.29777	2.5876	1.12819
00000001_8.tif	3	3	3:3	10.762	2.047	4.90112	10.2086	5.30749	1	0.29777	3.03982	1.58041
00000001_8.tif	3	3	3:3	13.373	2.047	4.90112	9.34618	4.44506	1	0.29777	2.78301	1.32361
00000001_8.tif	3	3	3:3	13.54	1.911	4.90112	9.44683	4.54571	1	0.29777	2.81298	1.35358
00000001_8.tif	3	3	3:3	12.63	1.231	4.90112	10.3128	5.41171	1	0.29777	3.07085	1.61144
00000001_8.tif	3	3	3:3	12.818	1.161	4.90112	10.3338	5.43264	1	0.29777	3.07708	1.61768
00000001_8.tif	3	3	3:3	14.29	1.273	4.90112	9.97098	5.06986	1	0.29777	2.96906	1.50965
00000001_8.tif	3	3	3:3	14.464	1.141	4.90112	10.0865	5.18534	1	0.29777	3.00344	1.54404
00000001_8.tif	3	3	3:3	14.457	1.307	4.90112	9.92162	5.02051	1	0.29777	2.95436	1.49496
00000001_8.tif	3	3	3:3	15.991	3.53	4.90112	7.69436	2.79325	1	0.29777	2.29115	0.831745
00000001_8.tif	3	3	3:3	16.2	2.849	4.90112	8.39272	3.4916	1	0.29777	2.4991	1.03969
00000001_8.tif	3	3	3:3	20.391	20.602	4.90112	10.6994	5.79833	1	0.29777	3.18597	1.72657
00000001_8.tif	3	3	3:3	20.502	20.429	4.90112	10.6017	5.70057	1	0.29777	3.15686	1.69746
00000001_8.tif	3	3	3:3	19.731	14.161	4.90112	5.33567	0.434555	1	0.29777	1.5888	0.129397
00000001_8.tif	3	3	3:3	19.738	13.918	4.90112	5.21038	0.309269	1	0.29777	1.5515	0.0920909
00000001_8.tif	3	3	3:3	22.092	4.023	4.90112	9.87831	4.97719	1	0.29777	2.94146	1.48206
00000001_8.tif	3	3	3:3	24.745	12.842	4.90112	9.59082	4.68971	1	0.29777	2.85586	1.39645
00000001_8.tif	3	3	3:3	25.043	13.238	4.90112	9.95824	5.05712	1	0.29777	2.96527	1.50586
00000001_8.tif	3	3	3:3	25.078	13.432	4.90112	10.034	5.13288	1	0.29777	2.98782	1.52842
00000001_8.tif	3	3	3:3	23.043	16.533	4.90112	9.4083	4.50718	1	0.29777	2.80151	1.3421
00000001_8.tif	3	3	3:3	24.536	15.262	4.90112	10.0953	5.19422	1	0.29777	3.00609	1.54668
00000001_8.tif	3	3	3:3	24.821	14.644	4.90112	10.13	5.22884	1	0.29777	3.0164	1.55699
00000001_8.tif	3	3	3:3	22.623	19.158	4.90112	10.8218	5.92069	1	0.29777	3.22241	1.763
00000001_8.tif	3	3	3:3	15.297	9.03	4.90112	2.163	-2.73812	0	0.29777	0.644077	-0.815329
00000001_8.tif	3	3	3:3	16.332	10.564	4.90112	1.21114	-3.68997	0	0.29777	0.360642	-1.09876
00000003_2.tif	0	6	0:6	9.521	6.292	5.32823	6.32385	0.995622	1	0.29777	1.88305	0.296466
00000003_2.tif	0	6	0:6	9.873	6.321	5.32823	6.07819	0.749953	1	0.29777	1.8099	0.223313
00000003_2.tif	0	6	0:6	10.04	6.627	5.32823	5.73471	0.406476	1	0.29777	1.70762	0.121037
00000003_2.tif	0	6	0:6	10.957	6.807	5.32823	5.0563	-0.27193	0	0.29777	1.50562	-0.0809726
00000003_2.tif	0	6	0:6	10.637	7.196	5.32823	4.91848	-0.409751	0	0.29777	1.46458	-0.122012
00000003_2.tif	0	6	0:6	10.623	7.488	5.32823	4.69908	-0.62915	0	0.29777	1.39925	-0.187342
00000003_2.tif	0	6	0:6	10.387	7.641	5.32823	4.74076	-0.587471	0	0.29777	1.41166	-0.174931
00000003_2.tif	0	6	0:6	9.651	7.349	5.32823	5.46763	0.139394	1	0.29777	1.6281	0.0415075
00000003_2.tif	0	6	0:6	9.658	7.05	5.32823	5.67196	0.343733	1	0.29777	1.68894	0.102353
00000003_2.tif	0	6	0:6	8.207	7.918	5.32823	6.28711	0.958873	1	0.29777	1.87211	0.285524
00000003_2.tif	0	6	0:6	8.137	8.155	5.32823	6.23219	0.903957	1	0.29777	1.85576	0.269171
00000003_2.tif	0	6	0:6	8.589	8.856	5.32823	5.51749	0.189261	1	0.29777	1.64294	0.0563562
00000003_2.tif	0	6	0:6	8.748	8.87	5.32823	5.36678	0.0385513	1	0.29777	1.59807	0.0114794
00000003_2.tif	0	6	0:6	9.575	9.196	5.32823	4.47933	-0.848898	0	0.29777	1.33381	-0.252776
00000003_2.tif	0	6	0:6	9.839	9.741	5.32823	4.02689	-1.30134	0	0.29777	1.19909	-0.387501
00000003_2.tif	0	6	0:6	9.908	9.641	5.32823	3.99738	-1.33085	0	0.29777	1.1903	-0.396288
00000003_2.tif	0	6	0:6	9.325	9.679	5.32823	4.53315	-0.795085	0	0.29777	1.34984	-0.236752
00000003_2.tif	0	6	0:6	9.54	9.797	5.32823	4.29224	-1.03599	0	0.29777	1.2781	-0.308488
00000003_2.tif	0	6	0:6	6.762	9.849	5.32823	6.98083	1.65259	1	0.29777	2.07868	0.492093
00000003_2.tif	0	6	0:6	5.401	9.856	5.32823	8.32235	2.99412	1	0.29777	2.47815	0.891558
00000003_2.tif	0	6	0:6	5.214	10.043	5.32823	8.48199	3.15376	1	0.29777	2.52568	0.939095
00000003_2.tif	0	6	0:6	9.637	10.54	5.32823	4.03194	-1.29629	0	0.29777	1.20059	-0.385997
00000003_2.tif	0	6	0:6	10.943	12.707	5.32823	3.13139	-2.19684	0	0.29777	0.932435	-0.654152
00000003_2.tif	0	6	0:6	9.005	13.033	5.32823	5.01308	-0.315151	0	0.29777	1.49275	-0.0938426
00000003_2.tif	0	6	0:6	9.13	13.186	5.32823	4.9604	-0.367832	0	0.29777	1.47706	-0.109529
00000003_2.tif	0	6	0:6	9.172	13.29	5.32823	4.96732	-0.360915	0	0.29777	1.47912	-0.10747
00000003_2.tif	0	6	0:6	9.873	14.095	5.32823	4.80532	-0.522916	0	0.29777	1.43088	-0.155709
00000003_2.tif	0	6	0:6	10.012	14.102	5.32823	4.70191	-0.626325	0	0.29777	1.40009	-0.186501
00000003_2.tif	0	6	0:6	10.401	12.345	5.32823	3.46106	-1.86717	0	0.29777	1.0306	-0.555987
00000003_2.tif	0	6	0:6	10.512	12.429	5.32823	3.38981	-1.93842	0	0.29777	1.00938	-0.577203
00000003_2.tif	0	6	0:6	9.859	12.332	5.32823	3.96746	-1.36077	0	0.29777	1.18139	-0.405197
00000003_2.tif	0	6	0:6	9.679	12.082	5.32823	4.07145	-1.25678	0	0.29777	1.21236	-0.374233
00000003_2.tif	0	6	0:6	9.693	11.519	5.32823	3.95934	-1.36889	0	0.29777	1.17897	-0.407615
00000003_2.tif	0	6	0:6	10.248	14.832	5.32823	5.03718	-0.291049	0	0.29777	1.49992	-0.0866657
00000003_2.tif	0	6	0:6	14.203	17.474	5.32823	6.4007	1.07247	1	0.29777	1.90594	0.319349
00000003_2.tif	0	6	0:6	14.488	17.099	5.32823	6.06104	0.732804	1	0.29777	1.80479	0.218207
00000003_2.tif	0	6	0:6	14.592	17.196	5.32823	6.17243	0.844195	1	0.29777	1.83796	0.251376
00000003_2.tif	0	6	0:6	14.641	16.981	5.32823	5.96825	0.640021	1	0.29777	1.77717	0.190579
00000003_2.tif	0	6	0:6	14.495	16.481	5.32823	5.45107	0.122836	1	0.29777	1.62316	0.036577
00000003_2.tif	0	6	0:6	14.328	16.266	5.32823	5.21393	-0.1143	0	0.29777	1.55255	-0.034035
00000003_2.tif	0	6	0:6	14.578	16.259	5.32823	5.24636	-0.0818712	0	0.29777	1.56221	-0.0243788
00000003_2.tif	0	6	0:6	13.606	17.057	5.32823	5.95805	0.629816	1	0.29777	1.77413	0.18754
00000003_2.tif	0	6	0:6	13.634	16.863	5.32823	5.764	0.435769	1	0.29777	1.71635	0.129759
00000003_2.tif	0	6	0:6	13.752	16.134	5.32823	5.03648	-0.291754	0	0.29777	1.49971	-0.0868757
00000003_2.tif	0	6	0:6	13.557	16.002	5.32823	4.90354	-0.424689	0	0.29777	1.46013	-0.12646
00000003_2.tif	0	6	0:6	13.745	15.835	5.32823	4.7374	-0.590836	0	0.29777	1.41065	-0.175933
00000003_2.tif	0	6	0:6	13.939	15.752	5.32823	4.66325	-0.664983	0	0.29777	1.38858	-0.198012
00000003_2.tif	0	6	0:6	12.55	16.002	5.32823	5.02054	-0.307694	0	0.29777	1.49497	-0.0916219
00000003_2.tif	0	6	0:6	12.661	16.05	5.32823	5.04493	-0.283298	0	0.29777	1.50223	-0.0843576
00000003_2.tif	0	6	0:6	11.689	14.28	5.32823	3.72642	-1.60181	0	0.29777	1.10962	-0.47697
00000003_2.tif	0	6	0:6	11.418	14.057	5.32823	3.6936	-1.63463	0	0.29777	1.09984	-0.486743
00000003_2.tif	0	6	0:6	11.161	14.141	5.32823	3.91787	-1.41036	0	0.29777	1.16662	-0.419963
00000003_2.tif	0	6	0:6	11.161	14.335	5.32823	4.07034	-1.25789	0	0.29777	1.21202	-0.374563
00000003_2.tif	0	6	0:6	14.717	13.304	5.32823	2.45837	-2.86986	0	0.29777	0.732029	-0.854558
00000003_2.tif	0	6	0:6	14.967	13.408	5.32823	2.66815	-2.66008	0	0.29777	0.794496	-0.792091
00000003_2.tif	0	6	0:6	15.335	13.345	5.32823	2.81985	-2.50838	0	0.29777	0.839666	-0.746922
00000003_2.tif	0	6	0:6	15.3	11.901	5.32823	1.85259	-3.47564	0	0.29777	0.551647	-1.03494
00000003_2.tif	0	6	0:6	13.981	11.484	5.32823	0.520986	-4.80725	0	0.29777	0.155134	-1.43145
00000003_2.tif	0	6	0:6	13.759	11.477	5.32823	0.399406	-4.92883	0	0.29777	0.118931	-1.46766
00000003_2.tif	0	6	0:6	13.564	11.873	5.32823	0.776809	-4.55142	0	0.29777	0.23131	-1.35528
00000003_2.tif	0	6	0:6	13.016	11.727	5.32823	0.878282	-4.44995	0	0.29777	0.261526	-1.32506
00000003_2.tif	0	6	0:6	13.036	11.394	5.32823	0.66322	-4.66501	0	0.29777	0.197487	-1.3891
00000003_2.tif	0	6	0:6	12.78	11.526	5.32823	0.951225	-4.37701	0	0.29777	0.283246	-1.30334
00000003_2.tif	0	6	0:6	12.516	11.318	5.32823	1.13532	-4.19291	0	0.29777	0.338065	-1.24852
00000003_2.tif	0	6	0:6	15.342	10.095	5.32823	1.98468	-3.34355	0	0.29777	0.590979	-0.995609
00000003_2.tif	0	6	0:6	15.28	10.04	5.32823	1.96061	-3.36762	0	0.29777	0.58381	-1.00278
00000003_2.tif	0	6	0:6	11.543	10.262	5.32823	2.24859	-3.07965	0	0.29777	0.669561	-0.917026
00000003_2.tif	0	6	0:6	11.314	9.679	5.32823	2.71666	-2.61157	0	0.29777	0.808941	-0.777647
00000003_2.tif	0	6	0:6	11.717	8.734	5.32823	3.04184	-2.28639	0	0.29777	0.905769	-0.680819
00000003_2.tif	0	6	0:6	12.856	9.033	5.32823	2.20623	-3.12201	0	0.29777	0.656948	-0.92964
00000003_2.tif	0	6	0:6	14.557	9.075	5.32823	2.22619	-3.10205	0	0.29777	0.662891	-0.923696
00000003_2.tif	0	6	0:6	15.682	8.79	5.32823	3.08904	-2.23919	0	0.29777	0.919824	-0.666763
00000003_2.tif	0	6	0:6	12.911	7.984	5.32823	3.1969	-2.13133	0	0.29777	0.951942	-0.634646
00000003_2.tif	0	6	0:6	13.995	7.595	5.32823	3.52296	-1.80527	0	0.29777	1.04903	-0.537556
00000003_2.tif	0	6	0:6	14.286	7.443	5.32823	3.71439	-1.61385	0	0.29777	1.10603	-0.480555
00000003_2.tif	0	6	0:6	14.502	7.394	5.32823	3.80623	-1.522	0	0.29777	1.13338	-0.453206
00000003_2.tif	0	6	0:6	13.78	6.929	5.32823	4.1727	-1.15554	0	0.29777	1.2425	-0.344084
00000003_2.tif	0	6	0:6	13.946	6.97	5.32823	4.14107	-1.18716	0	0.29777	1.23309	-0.3535
00000003_2.tif	0	6	0:6	14.099	6.672	5.32823	4.45177	-0.876458	0	0.29777	1.3256	-0.260983
00000003_2.tif	0	6	0:6	14.175	6.505	5.32823	4.62621	-0.702018	0	0.29777	1.37755	-0.20904
00000003_2.tif	0	6	0:6	11.189	6.436	5.32823	5.26327	-0.0649585	0	0.29777	1.56725	-0.0193427
00000003_2.tif	0	6	0:6	11.398	6.394	5.32823	5.20758	-0.120656	0	0.29777	1.55066	-0.0359278
00000003_2.tif	0	6	0:6	11.571	6.589	5.32823	4.95778	-0.370452	0	0.29777	1.47628	-0.11031
00000003_2.tif	0	6	0:6	12.474	5.839	5.32823	5.38553	0.057298	1	0.29777	1.60365	0.0170616
00000003_2.tif	0	6	0:6	12.641	6.047	5.32823	5.1479	-0.180337	0	0.29777	1.53289	-0.053699
00000003_2.tif	0	6	0:6	13.231	5.825	5.32823	5.28907	-0.0391608	0	0.29777	1.57493	-0.0116609
00000003_2.tif	0	6	0:6	13.37	5.915	5.32823	5.19052	-0.137716	0	0.29777	1.54558	-0.0410078
00000003_2.tif	0	6	0:6	13.564	6.012	5.32823	5.08743	-0.240804	0	0.29777	1.51488	-0.0717042
00000003_2.tif	0	6	0:6	13.939	6.061	5.32823	5.04747	-0.280765	0	0.29777	1.50298	-0.0836034
00000003_2.tif	0	6	0:6	14.099	6.165	5.32823	4.95624	-0.371992	0	0.29777	1.47582	-0.110768
00000003_2.tif	0	6	0:6	14.002	5.477	5.32823	5.63429	0.306062	1	0.29777	1.67772	0.091136
00000003_2.tif	0	6	0:6	13.766	5.241	5.32823	5.85958	0.531346	1	0.29777	1.74481	0.158219
00000003_2.tif	0	6	0:6	14.668	5.332	5.32823	5.85967	0.531438	1	0.29777	1.74483	0.158246
00000003_2.tif	0	6	0:6	15.418	6.283	5.32823	5.1372	-0.191035	0	0.29777	1.5297	-0.0568844
00000003_2.tif	0	6	0:6	16.106	4.175	5.32823	7.35339	2.02516	1	0.29777	2.18962	0.603031
00000003_2.tif	0	6	0:6	18.703	4.655	5.32823	8.20125	2.87302	1	0.29777	2.44209	0.855498
00000003_2.tif	0	6	0:6	15.627	6.842	5.32823	4.70213	-0.626099	0	0.29777	1.40015	-0.186433
00000003_2.tif	0	6	0:6	15.689	6.911	5.32823	4.66678	-0.661453	0	0.29777	1.38963	-0.196961
00000003_2.tif	0	6	0:6	15.655	7.092	5.32823	4.48962	-0.838614	0	0.29777	1.33687	-0.249714
00000003_2.tif	0	6	0:6	16.516	6.78	5.32823	5.19449	-0.133739	0	0.29777	1.54676	-0.0398235
00000003_2.tif	0	6	0:6	17.356	6.634	5.32823	5.81544	0.487204	1	0.29777	1.73166	0.145075
00000003_2.tif	0	6	0:6	17.509	6.745	5.32823	5.83129	0.503059	1	0.29777	1.73638	0.149796
00000003_2.tif	0	6	0:6	17.641	6.828	5.32823	5.85914	0.530911	1	0.29777	1.74468	0.158089
00000003_2.tif	0	6	0:6	15.842	8.457	5.32823	3.44574	-1.88249	0	0.29777	1.02604	-0.56055
00000003_2.tif	0	6	0:6	16.078	8.352	5.32823	3.6795	-1.64873	0	0.29777	1.09564	-0.490943
00000003_2.tif	0	6	0:6	16.266	8.311	5.32823	3.83685	-1.49138	0	0.29777	1.1425	-0.444088
00000003_2.tif	0	6	0:6	16.773	7.637	5.32823	4.67588	-0.652348	0	0.29777	1.39234	-0.19425
00000003_2.tif	0	6	0:6	16.953	7.609	5.32823	4.81897	-0.509267	0	0.29777	1.43494	-0.151644
00000003_2.tif	0	6	0:6	17.002	8.297	5.32823	4.38424	-0.943989	0	0.29777	1.3055	-0.281092
00000003_2.tif	0	6	0:6	17.509	8.262	5.32823	4.80575	-0.522485	0	0.29777	1.43101	-0.15558
00000003_2.tif	0	6	0:6	17.363	9.144	5.32823	4.21394	-1.11429	0	0.29777	1.25479	-0.331802
00000003_2.tif	0	6	0:6	17.842	9.2	5.32823	4.6203	-0.707935	0	0.29777	1.37579	-0.210802
00000003_2.tif	0	6	0:6	19.62	8.325	5.32823	6.60115	1.27292	1	0.29777	1.96562	0.379037
00000003_2.tif	0	6	0:6	19.293	11.609	5.32823	5.68592	0.357686	1	0.29777	1.6931	0.106508
00000003_2.tif	0	6	0:6	16.245	11.804	5.32823	2.70837	-2.61987	0	0.29777	0.80647	-0.780117
00000003_2.tif	0	6	0:6	16.314	14.38	5.32823	4.23896	-1.08927	0	0.29777	1.26224	-0.324351
00000003_2.tif	0	6	0:6	16.474	14.304	5.32823	4.2849	-1.04333	0	0.29777	1.27591	-0.310673
00000003_2.tif	0	6	0:6	15.793	13.484	5.32823	3.21975	-2.10848	0	0.29777	0.958745	-0.627843
00000003_2.tif	0	6	0:6	17.856	13.595	5.32823	4.90806	-0.420168	0	0.29777	1.46147	-0.125114
00000003_2.tif	0	6	0:6	18.12	12.686	5.32823	4.76221	-0.56602	0	0.29777	1.41804	-0.168544
00000003_2.tif	0	6	0:6	18.196	12.797	5.32823	4.8715	-0.456727	0	0.29777	1.45059	-0.136
00000003_2.tif	0	6	0:6	18.905	12.547	5.32823	5.47013	0.141898	1	0.29777	1.62884	0.0422531
00000003_2.tif	0	6	0:6	19.425	13.457	5.32823	6.25637	0.92814	1	0.29777	1.86296	0.276372
00000003_2.tif	0	6	0:6	19.314	13.741	5.32823	6.26802	0.939783	1	0.29777	1.86643	0.279839
00000003_2.tif	0	6	0:6	19.002	14.005	5.32823	6.10764	0.779404	1	0.29777	1.81867	0.232083
00000003_2.tif	0	6	0:6	19.453	14.283	5.32823	6.63665	1.30842	1	0.29777	1.9762	0.389609
00000003_2.tif	0	6	0:6	20.148	15.991	5.32823	8.1496	2.82137	1	0.29777	2.42671	0.840119
00000003_2.tif	0	6	0:6	20.252	16.269	5.32823	8.40118	3.07295	1	0.29777	2.50162	0.915031
00000003_2.tif	0	6	0:6	16.217	15.325	5.32823	4.95496	-0.373271	0	0.29777	1.47544	-0.111149
00000003_2.tif	0	6	0:6	16.203	15.651	5.32823	5.22887	-0.0993669	0	0.29777	1.557	-0.0295885
00000003_2.tif	0	6	0:6	16.335	16.089	5.32823	5.67601	0.347781	1	0.29777	1.69015	0.103559
00000003_2.tif	0	6	0:6	16.606	16.207	5.32823	5.9117	0.583471	1	0.29777	1.76033	0.17374
00000003_2.tif	0	6	0:6	15.37	20.13	5.32823	9.1971	3.86886	1	0.29777	2.73862	1.15203
00000003_2.tif	0	6	0:6	15.523	20.082	5.32823	9.18029	3.85206	1	0.29777	2.73362	1.14703
00000003_2.tif	0	6	0:6	22.137	15.745	5.32823	9.69301	4.36477	1	0.29777	2.88629	1.2997
00000003_2.tif	0	6	0:6	21.964	15.627	5.32823	9.48464	4.1564	1	0.29777	2.82424	1.23765
00000003_2.tif	0	6	0:6	21.991	15.141	5.32823	9.28677	3.95854	1	0.29777	2.76532	1.17873
00000003_2.tif	0	6	0:6	22.151	12.658	5.32823	8.66244	3.33421	1	0.29777	2.57942	0.992828
00000003_2.tif	0	6	0:6	22.04	12.595	5.32823	8.54202	3.21379	1	0.29777	2.54356	0.95697
00000003_2.tif	0	6	0:6	20.686	11.241	5.32823	7.05743	1.7292	1	0.29777	2.10149	0.514903
00000003_2.tif	0	6	0:6	20.54	11.297	5.32823	6.91284	1.5846	1	0.29777	2.05844	0.471848
00000003_2.tif	0	6	0:6	20.568	11.165	5.32823	6.93831	1.61008	1	0.29777	2.06602	0.479434
00000003_3.tif	1	5	1:5	14.927	4.458	4.62002	7.31143	2.69141	1	0.29777	2.17713	0.801422
00000003_3.tif	1	5	1:5	14.432	4.505	4.62002	7.26606	2.64604	1	0.29777	2.16361	0.78791
00000003_3.tif	1	5	1:5	11.432	4.245	4.62002	8.20152	3.5815	1	0.29777	2.44217	1.06646
00000003_3.tif	1	5	1:5	10.224	4.703	4.62002	8.36346	3.74344	1	0.29777	2.49039	1.11468
00000003_3.tif	1	5	1:5	10.422	4.839	4.62002	8.14311	3.52309	1	0.29777	2.42477	1.04907
00000003_3.tif	1	5	1:5	10.651	5.557	4.62002	7.4142	2.79418	1	0.29777	2.20773	0.832023
00000003_3.tif	1	5	1:5	8.193	6.182	4.62002	8.57678	3.95676	1	0.29777	2.55391	1.1782
00000003_3.tif	1	5	1:5	8.234	5.943	4.62002	8.70375	4.08373	1	0.29777	2.59172	1.21601
00000003_3.tif	1	5	1:5	8.193	10.349	4.62002	6.66243	2.04241	1	0.29777	1.98387	0.608169
00000003_3.tif	1	5	1:5	9.533	9.071	4.62002	5.83026	1.21024	1	0.29777	1.73608	0.360373
00000003_3.tif	1	5	1:5	9.436	9.349	4.62002	5.7951	1.17508	1	0.29777	1.72561	0.349903
00000003_3.tif	1	5	1:5	9.651	9.266	4.62002	5.63673	1.01671	1	0.29777	1.67845	0.302745
00000003_3.tif	1	5	1:5	9.825	9.474	4.62002	5.38963	0.769613	1	0.29777	1.60487	0.229168
00000003_3.tif	1	5	1:5	8.082	10.252	4.62002	6.79189	2.17187	1	0.29777	2.02242	0.646719
00000003_3.tif	1	5	1:5	7.984	10.252	4.62002	6.88746	2.26744	1	0.29777	2.05088	0.675177
00000003_3.tif	1	5	1:5	11.873	10.616	4.62002	3.05473	-1.56529	0	0.29777	0.909608	-0.466095
00000003_3.tif	1	5	1:5	11.873	10.852	4.62002	2.97394	-1.64608	0	0.29777	0.885549	-0.490154
00000003_3.tif	1	5	1:5	10.283	12.019	4.62002	4.42723	-0.192785	0	0.29777	1.3183	-0.0574057
00000003_3.tif	1	5	1:5	9.686	12.172	4.62002	5.0334	0.413381	1	0.29777	1.4988	0.123092
00000003_3.tif	1	5	1:5	8.47	11.561	4.62002	6.23637	1.61635	1	0.29777	1.857	0.481301
00000003_3.tif	1	5	1:5	8.54	11.991	4.62002	6.16711	1.54709	1	0.29777	1.83638	0.460676
00000003_3.tif	1	5	1:5	8.755	12.741	4.62002	6.02738	1.40736	1	0.29777	1.79477	0.41907
00000003_3.tif	1	5	1:5	8.957	12.734	4.62002	5.82697	1.20695	1	0.29777	1.7351	0.359392
00000003_3.tif	1	5	1:5	9.047	12.818	4.62002	5.753	1.13298	1	0.29777	1.71307	0.337368
00000003_3.tif	1	5	1:5	9.352	13.047	4.62002	5.5022	0.882176	1	0.29777	1.63839	0.262685
00000003_3.tif	1	5	1:5	6.866	14.54	4.62002	8.31346	3.69344	1	0.29777	2.4755	1.0998
00000003_3.tif	1	5	1:5	6.964	14.693	4.62002	8.27402	3.654	1	0.29777	2.46376	1.08805
00000003_3.tif	1	5	1:5	7.116	14.609	4.62002	8.10217	3.48215	1	0.29777	2.41258	1.03688
00000003_3.tif	1	5	1:5	8.852	16.165	4.62002	7.32021	2.70018	1	0.29777	2.17974	0.804034
00000003_3.tif	1	5	1:5	8.832	16.012	4.62002	7.24549	2.62547	1	0.29777	2.15749	0.781787
00000003_3.tif	1	5	1:5	8.679	15.943	4.62002	7.33048	2.71046	1	0.29777	2.1828	0.807093
00000003_3.tif	1	5	1:5	11.484	15.887	4.62002	5.22921	0.609186	1	0.29777	1.5571	0.181397
00000003_3.tif	1	5	1:5	11.373	15.714	4.62002	5.16484	0.544823	1	0.29777	1.53794	0.162232
00000003_3.tif	1	5	1:5	11.526	15.408	4.62002	4.83296	0.212939	1	0.29777	1.43911	0.0634068
00000003_3.tif	1	5	1:5	11.936	14.929	4.62002	4.20248	-0.417538	0	0.29777	1.25137	-0.12433
00000003_3.tif	1	5	1:5	12.179	14.769	4.62002	3.92283	-0.697192	0	0.29777	1.1681	-0.207603
00000003_3.tif	1	5	1:5	11.207	15.47	4.62002	5.09329	0.473273	1	0.29777	1.51663	0.140926
00000003_3.tif	1	5	1:5	11.311	15.359	4.62002	4.94119	0.321165	1	0.29777	1.47134	0.0956333
00000003_3.tif	1	5	1:5	11.005	15.29	4.62002	5.10821	0.488187	1	0.29777	1.52107	0.145367
00000003_3.tif	1	5	1:5	10.526	15.22	4.62002	5.4201	0.800076	1	0.29777	1.61394	0.238239
00000003_3.tif	1	5	1:5	10.332	15.13	4.62002	5.51563	0.895606	1	0.29777	1.64239	0.266685
00000003_3.tif	1	5	1:5	9.095	15.575	4.62002	6.77924	2.15922	1	0.29777	2.01866	0.642952
00000003_3.tif	1	5	1:5	8.929	15.491	4.62002	6.8713	2.25128	1	0.29777	2.04607	0.670362
00000003_3.tif	1	5	1:5	12.234	19.373	4.62002	7.99765	3.37763	1	0.29777	2.38146	1.00576
00000003_3.tif	1	5	1:5	8.047	17.575	4.62002	8.83441	4.21439	1	0.29777	2.63062	1.25492
00000003_3.tif	1	5	1:5	8.151	17.714	4.62002	8.84915	4.22913	1	0.29777	2.63501	1.25931
00000003_3.tif	1	5	1:5	7.957	17.88	4.62002	9.10437	4.48435	1	0.29777	2.71101	1.3353
00000003_3.tif	1	5	1:5	7.762	17.88	4.62002	9.24978	4.62976	1	0.29777	2.75431	1.3786
00000003_3.tif	1	5	1:5	7.554	17.832	4.62002	9.37574	4.75572	1	0.29777	2.79181	1.41611
00000003_3.tif	1	5	1:5	13.134	17.335	4.62002	5.7858	1.16578	1	0.29777	1.72284	0.347135
00000003_3.tif	1	5	1:5	14.085	17.085	4.62002	5.35478	0.734761	1	0.29777	1.59449	0.21879
00000003_3.tif	1	5	1:5	15.071	14.738	4.62002	2.9947	-1.62532	0	0.29777	0.891731	-0.483973
00000003_3.tif	1	5	1:5	15.231	14.71	4.62002	2.99097	-1.62905	0	0.29777	0.890622	-0.485081
00000003_3.tif	1	5	1:5	12.377	15.078	4.62002	4.04717	-0.572846	0	0.29777	1.20513	-0.170576
00000003_3.tif	1	5	1:5	12.384	14.502	4.62002	3.58657	-1.03345	0	0.29777	1.06797	-0.307732
00000003_3.tif	1	5	1:5	16.53	13.082	4.62002	2.25162	-2.3684	0	0.29777	0.670464	-0.705239
00000003_3.tif	1	5	1:5	16.439	12.401	4.62002	1.84849	-2.77153	0	0.29777	0.550425	-0.825278
00000003_3.tif	1	5	1:5	13.967	13.311	4.62002	1.71135	-2.90867	0	0.29777	0.509589	-0.866115
00000003_3.tif	1	5	1:5	13.766	13.04	4.62002	1.58147	-3.03855	0	0.29777	0.470914	-0.904789
00000003_3.tif	1	5	1:5	13.87	12.894	4.62002	1.40224	-3.21778	0	0.29777	0.417545	-0.958159
00000003_3.tif	1	5	1:5	13.474	12.477	4.62002	1.41985	-3.20017	0	0.29777	0.422787	-0.952916
00000003_3.tif	1	5	1:5	13.703	12.651	4.62002	1.33537	-3.28465	0	0.29777	0.397634	-0.978069
00000003_3.tif	1	5	1:5	12.398	10.957	4.62002	2.44285	-2.17717	0	0.29777	0.727407	-0.648297
00000003_3.tif	1	5	1:5	15.606	11.665	4.62002	0.908631	-3.71139	0	0.29777	0.270563	-1.10514
00000003_3.tif	1	5	1:5	15.46	11.387	4.62002	0.846575	-3.77344	0	0.29777	0.252085	-1.12362
00000003_3.tif	1	5	1:5	15.918	11.311	4.62002	1.2974	-3.32262	0	0.29777	0.386327	-0.989376
00000003_3.tif	1	5	1:5	15.877	10.575	4.62002	1.67235	-2.94767	0	0.29777	0.497976	-0.877728
00000003_3.tif	1	5	1:5	16.016	10.526	4.62002	1.80598	-2.81404	0	0.29777	0.537767	-0.837936
00000003_3.tif	1	5	1:5	15.495	10.88	4.62002	1.18839	-3.43163	0	0.29777	0.353866	-1.02184
00000003_3.tif	1	5	1:5	15.328	11.005	4.62002	0.984757	-3.63526	0	0.29777	0.293231	-1.08247
00000003_3.tif	1	5	1:5	15.21	10.984	4.62002	0.931973	-3.68805	0	0.29777	0.277513	-1.09819
00000003_3.tif	1	5	1:5	14.578	11.2	4.62002	0.579639	-4.04038	0	0.29777	0.172599	-1.2031
00000003_3.tif	1	5	1:5	14.648	10.755	4.62002	1.01249	-3.60753	0	0.29777	0.301491	-1.07421
00000003_3.tif	1	5	1:5	14.842	10.665	4.62002	1.10974	-3.51028	0	0.29777	0.330447	-1.04526
00000003_3.tif	1	5	1:5	14.988	10.401	4.62002	1.39444	-3.22558	0	0.29777	0.415221	-0.960482
00000003_3.tif	1	5	1:5	14.175	10.339	4.62002	1.52155	-3.09847	0	0.29777	0.453072	-0.922632
00000003_3.tif	1	5	1:5	14.273	10.262	4.62002	1.56426	-3.05576	0	0.29777	0.46579	-0.909913
00000003_3.tif	1	5	1:5	18.686	2.821	4.62002	9.7917	5.17168	1	0.29777	2.91567	1.53997
00000003_3.tif	1	5	1:5	19.269	2.793	4.62002	10.0679	5.4479	1	0.29777	2.99793	1.62222
00000003_3.tif	1	5	1:5	20.554	4.043	4.62002	9.68911	5.06909	1	0.29777	2.88513	1.50942
00000003_3.tif	1	5	1:5	20.332	3.939	4.62002	9.64093	5.02091	1	0.29777	2.87078	1.49508
00000003_3.tif	1	5	1:5	21.089	7.998	4.62002	7.41477	2.79475	1	0.29777	2.2079	0.832193
00000003_3.tif	1	5	1:5	16.977	8.97	4.62002	3.60398	-1.01604	0	0.29777	1.07316	-0.302545
00000003_3.tif	1	5	1:5	17.186	8.915	4.62002	3.78067	-0.839347	0	0.29777	1.12577	-0.249932
00000003_3.tif	1	5	1:5	20.033	9.04	4.62002	5.98665	1.36663	1	0.29777	1.78264	0.406941
00000003_3.tif	1	5	1:5	17.707	10.283	4.62002	3.35012	-1.2699	0	0.29777	0.997565	-0.378138
00000003_3.tif	1	5	1:5	18.47	10.568	4.62002	3.95291	-0.667111	0	0.29777	1.17706	-0.198646
00000003_3.tif	1	5	1:5	18.915	10.738	4.62002	4.33563	-0.284386	0	0.29777	1.29102	-0.0846815
00000003_3.tif	1	5	1:5	19.2	10.582	4.62002	4.65025	0.030234	1	0.29777	1.38471	0.00900277
00000003_3.tif	1	5	1:5	19.047	10.227	4.62002	4.60856	-0.0114569	0	0.29777	1.37229	-0.00341151
00000003_3.tif	1	5	1:5	17.491	12.224	4.62002	2.82537	-1.79465	0	0.29777	0.84131	-0.534393
00000003_3.tif	1	5	1:5	17.387	12.405	4.62002	2.75902	-1.861	0	0.29777	0.821553	-0.554151
00000003_3.tif	1	5	1:5	17.72	12.342	4.62002	3.07149	-1.54853	0	0.29777	0.914598	-0.461105
00000003_3.tif	1	5	1:5	17.665	12.564	4.62002	3.06761	-1.55241	0	0.29777	0.913443	-0.46226
00000003_3.tif	1	5	1:5	18.602	11.231	4.62002	3.93553	-0.684487	0	0.29777	1.17188	-0.20382
00000003_3.tif	1	5	1:5	20.873	11.335	4.62002	6.18504	1.56501	1	0.29777	1.84172	0.466014
00000003_3.tif	1	5	1:5	20.616	11.87	4.62002	5.91391	1.29389	1	0.29777	1.76099	0.385283
00000003_3.tif	1	5	1:5	20.908	12.203	4.62002	6.22037	1.60035	1	0.29777	1.85224	0.476536
00000003_3.tif	1	5	1:5	19.707	12.974	4.62002	5.14775	0.527725	1	0.29777	1.53284	0.157141
00000003_3.tif	1	5	1:5	19.332	12.759	4.62002	4.73431	0.11429	1	0.29777	1.40974	0.034032
00000003_3.tif	1	5	1:5	21.165	15.873	4.62002	7.65669	3.03667	1	0.29777	2.27993	0.904229
00000003_3.tif	1	5	1:5	21.082	16.054	4.62002	7.68626	3.06624	1	0.29777	2.28874	0.913034
00000003_3.tif	1	5	1:5	20.887	17.394	4.62002	8.36159	3.74157	1	0.29777	2.48983	1.11413
00000003_3.tif	1	5	1:5	19.88	16.714	4.62002	7.16129	2.54127	1	0.29777	2.13242	0.756713
00000003_3.tif	1	5	1:5	19.804	16.491	4.62002	6.95312	2.3331	1	0.29777	2.07043	0.694726
00000003_3.tif	1	5	1:5	19.998	16.491	4.62002	7.09666	2.47664	1	0.29777	2.11317	0.73747
00000003_3.tif	1	5	1:5	19.019	15.012	4.62002	5.4004	0.780384	1	0.29777	1.60808	0.232375
00000003_3.tif	1	5	1:5	18.894	15.033	4.62002	5.31392	0.693902	1	0.29777	1.58233	0.206623
00000003_3.tif	1	5	1:5	19.102	16.095	4.62002	6.17183	1.55181	1	0.29777	1.83778	0.462081
00000003_3.tif	1	5	1:5	19.255	16.04	4.62002	6.24402	1.624	1	0.29777	1.85928	0.483578
00000003_3.tif	1	5	1:5	18.394	15.616	4.62002	5.33348	0.713457	1	0.29777	1.58815	0.212446
00000003_3.tif	1	5	1:5	17.644	15.276	4.62002	4.57926	-0.0407648	0	0.29777	1.36356	-0.0121385
00000003_3.tif	1	5	1:5	17.352	16.123	4.62002	5.09908	0.479063	1	0.29777	1.51835	0.142651
00000003_3.tif	1	5	1:5	17.575	16.741	4.62002	5.74448	1.12446	1	0.29777	1.71053	0.334829
00000003_3.tif	1	5	1:5	17.734	16.72	4.62002	5.80767	1.18765	1	0.29777	1.72935	0.353648
00000003_3.tif	1	5	1:5	16.137	21.137	4.62002	9.48008	4.86006	1	0.29777	2.82288	1.44718
00000003_3.tif	1	5	1:5	16.13	20.964	4.62002	9.30804	4.68802	1	0.29777	2.77165	1.39595
00000003_3.tif	1	5	1:5	16.262	20.991	4.62002	9.35581	4.73579	1	0.29777	2.78588	1.41017
00000003_3.tif	1	5	1:5	17.561	19.373	4.62002	8.12617	3.50615	1	0.29777	2.41973	1.04403
00000003_3.tif	1	5	1:5	17.575	18.783	4.62002	7.582	2.96198	1	0.29777	2.25769	0.881988
00000003_3.tif	1	5	1:5	22.307	5.411	4.62002	9.90994	5.28992	1	0.29777	2.95088	1.57518
00000006_1.tif	0	6	0:6	10.271	3.677	4.87481	6.65164	1.77683	1	0.29777	1.98066	0.529087
00000006_1.tif	0	6	0:6	10.438	3.479	4.87481	6.76655	1.89174	1	0.29777	2.01487	0.563303
00000006_1.tif	0	6	0:6	7.38	5.464	4.87481	7.07983	2.20503	1	0.29777	2.10816	0.65659
00000006_1.tif	0	6	0:6	7.13	5.432	4.87481	7.29973	2.42492	1	0.29777	2.17364	0.722068
00000006_1.tif	0	6	0:6	7.5	7.141	4.87481	6.10653	1.23172	1	0.29777	1.81834	0.36677
00000006_1.tif	0	6	0:6	7.667	7.135	4.87481	5.9583	1.08349	1	0.29777	1.7742	0.322632
00000006_1.tif	0	6	0:6	7.802	7.083	4.87481	5.86035	0.985548	1	0.29777	1.74504	0.293467
00000006_1.tif	0	6	0:6	11.026	8.938	4.87481	2.15539	-2.71942	0	0.29777	0.64181	-0.809761
00000006_1.tif	0	6	0:6	11.167	9.094	4.87481	1.96919	-2.90561	0	0.29777	0.586367	-0.865205
00000006_1.tif	0	6	0:6	9.901	8.245	4.87481	3.46398	-1.41083	0	0.29777	1.03147	-0.420102
00000006_1.tif	0	6	0:6	9.745	8.255	4.87481	3.60145	-1.27335	0	0.29777	1.07241	-0.379166
00000006_1.tif	0	6	0:6	10.401	8.948	4.87481	2.74351	-2.13129	0	0.29777	0.816936	-0.634636
00000006_1.tif	0	6	0:6	10.469	8.828	4.87481	2.71581	-2.15899	0	0.29777	0.808688	-0.642883
00000006_1.tif	0	6	0:6	10.339	8.734	4.87481	2.87	-2.00481	0	0.29777	0.854599	-0.596972
00000006_1.tif	0	6	0:6	10.349	8.615	4.87481	2.90416	-1.97065	0	0.29777	0.86477	-0.586801
00000006_1.tif	0	6	0:6	10.828	9.307	4.87481	2.24305	-2.63175	0	0.29777	0.667914	-0.783657
00000006_1.tif	0	6	0:6	10.844	10.068	4.87481	2.21312	-2.66169	0	0.29777	0.659	-0.792571
00000006_1.tif	0	6	0:6	10.76	10.156	4.87481	2.31079	-2.56401	0	0.29777	0.688085	-0.763486
00000006_1.tif	0	6	0:6	11.073	10.255	4.87481	2.02742	-2.84738	0	0.29777	0.603705	-0.847866
00000006_1.tif	0	6	0:6	7.234	10.229	4.87481	5.81852	0.943716	1	0.29777	1.73258	0.28101
00000006_1.tif	0	6	0:6	8.052	9.521	4.87481	4.98334	0.108536	1	0.29777	1.48389	0.0323187
00000006_1.tif	0	6	0:6	8.573	9.802	4.87481	4.4586	-0.416209	0	0.29777	1.32764	-0.123935
00000006_1.tif	0	6	0:6	8.938	9.984	4.87481	4.10094	-0.773871	0	0.29777	1.22114	-0.230436
00000006_1.tif	0	6	0:6	9.875	10.276	4.87481	3.20305	-1.67175	0	0.29777	0.953773	-0.497798
00000006_1.tif	0	6	0:6	9.771	9.87	4.87481	3.26305	-1.61176	0	0.29777	0.971638	-0.479934
00000006_1.tif	0	6	0:6	10.542	11.25	4.87481	2.91694	-1.95786	0	0.29777	0.868578	-0.582993
00000006_1.tif	0	6	0:6	10.474	12.042	4.87481	3.44793	-1.42688	0	0.29777	1.02669	-0.424881
00000006_1.tif	0	6	0:6	10.417	12.12	4.87481	3.54258	-1.33223	0	0.29777	1.05487	-0.396697
00000006_1.tif	0	6	0:6	9.625	11.76	4.87481	3.96558	-0.90923	0	0.29777	1.18083	-0.270742
00000006_1.tif	0	6	0:6	9.693	11.703	4.87481	3.878	-0.996802	0	0.29777	1.15475	-0.296818
00000006_1.tif	0	6	0:6	9.802	11.646	4.87481	3.75517	-1.11963	0	0.29777	1.11818	-0.333393
00000006_1.tif	0	6	0:6	9.766	11.464	4.87481	3.69736	-1.17745	0	0.29777	1.10096	-0.350609
00000006_1.tif	0	6	0:6	9.792	11.349	4.87481	3.62154	-1.25327	0	0.29777	1.07838	-0.373187
00000006_1.tif	0	6	0:6	6.625	13.734	4.87481	7.55492	2.68012	1	0.29777	2.24963	0.798058
00000006_1.tif	0	6	0:6	8.964	12.839	4.87481	5.11982	0.245016	1	0.29777	1.52453	0.0729585
00000006_1.tif	0	6	0:6	9.828	12.818	4.87481	4.44985	-0.424961	0	0.29777	1.32503	-0.126541
00000006_1.tif	0	6	0:6	9.562	12.344	4.87481	4.34421	-0.530594	0	0.29777	1.29358	-0.157995
00000006_1.tif	0	6	0:6	7.281	11.969	4.87481	6.17091	1.2961	1	0.29777	1.83751	0.38594
00000006_1.tif	0	6	0:6	7.484	12.12	4.87481	6.04037	1.16556	1	0.29777	1.79864	0.34707
00000006_1.tif	0	6	0:6	7.88	11.885	4.87481	5.58401	0.7092	1	0.29777	1.66275	0.211179
00000006_1.tif	0	6	0:6	14.531	14.604	4.87481	5.10055	0.225744	1	0.29777	1.51879	0.0672199
00000006_1.tif	0	6	0:6	14.969	14.5	4.87481	5.14959	0.274784	1	0.29777	1.53339	0.0818224
00000006_1.tif	0	6	0:6	15.062	14.776	4.87481	5.44033	0.565521	1	0.29777	1.61997	0.168395
00000006_1.tif	0	6	0:6	13.047	13.495	4.87481	3.76603	-1.10877	0	0.29777	1.12141	-0.330159
00000006_1.tif	0	6	0:6	13.188	13.385	4.87481	3.65937	-1.21544	0	0.29777	1.08965	-0.361921
00000006_1.tif	0	6	0:6	13.25	13.234	4.87481	3.51184	-1.36297	0	0.29777	1.04572	-0.405852
00000006_1.tif	0	6	0:6	11.562	12.703	4.87481	3.31702	-1.55778	0	0.29777	0.98771	-0.463862
00000006_1.tif	0	6	0:6	13.964	10.849	4.87481	1.4577	-3.41711	0	0.29777	0.434059	-1.01751
00000006_1.tif	0	6	0:6	13.292	9.51	4.87481	0.340708	-4.5341	0	0.29777	0.101453	-1.35012
00000006_1.tif	0	6	0:6	13.167	9.542	4.87481	0.231225	-4.64358	0	0.29777	0.0688519	-1.38272
00000006_1.tif	0	6	0:6	11.682	8.422	4.87481	1.87831	-2.9965	0	0.29777	0.559304	-0.892267
00000006_1.tif	0	6	0:6	12.682	8.786	4.87481	1.00551	-3.8693	0	0.29777	0.299411	-1.15216
00000006_1.tif	0	6	0:6	13.026	8.74	4.87481	0.989013	-3.88579	0	0.29777	0.294498	-1.15707
00000006_1.tif	0	6	0:6	14.24	8.495	4.87481	1.72755	-3.14725	0	0.29777	0.514413	-0.937158
00000006_1.tif	0	6	0:6	12.911	8.151	4.87481	1.58256	-3.29225	0	0.29777	0.471238	-0.980334
00000006_1.tif	0	6	0:6	12.859	7.865	4.87481	1.87192	-3.00289	0	0.29777	0.557401	-0.89417
00000006_1.tif	0	6	0:6	12.453	8.021	4.87481	1.80315	-3.07166	0	0.29777	0.536924	-0.914647
00000006_1.tif	0	6	0:6	12.141	8.094	4.87481	1.86154	-3.01327	0	0.29777	0.55431	-0.897261
00000006_1.tif	0	6	0:6	12.036	7.938	4.87481	2.04883	-2.82598	0	0.29777	0.61008	-0.841491
00000006_1.tif	0	6	0:6	12.167	7.688	4.87481	2.21634	-2.65846	0	0.29777	0.659961	-0.791611
00000006_1.tif	0	6	0:6	12.646	7.693	4.87481	2.07208	-2.80273	0	0.29777	0.617004	-0.834568
00000006_1.tif	0	6	0:6	12.688	6.99	4.87481	2.76039	-2.11441	0	0.29777	0.821962	-0.629609
00000006_1.tif	0	6	0:6	12.281	7.214	4.87481	2.62445	-2.25036	0	0.29777	0.781482	-0.67009
00000006_1.tif	0	6	0:6	11.562	6.979	4.87481	3.11777	-1.75704	0	0.29777	0.928377	-0.523194
00000006_1.tif	0	6	0:6	11.932	6.307	4.87481	3.59415	-1.28066	0	0.29777	1.07023	-0.381342
00000006_1.tif	0	6	0:6	12.333	6.479	4.87481	3.32411	-1.5507	0	0.29777	0.98982	-0.461751
00000006_1.tif	0	6	0:6	12.411	6.161	4.87481	3.62147	-1.25334	0	0.29777	1.07836	-0.373207
00000006_1.tif	0	6	0:6	12.792	6.177	4.87481	3.56003	-1.31478	0	0.29777	1.06007	-0.391501
00000006_1.tif	0	6	0:6	12.797	5.932	4.87481	3.8042	-1.0706	0	0.29777	1.13278	-0.318794
00000006_1.tif	0	6	0:6	12.562	5.979	4.87481	3.77921	-1.09559	0	0.29777	1.12534	-0.326235
00000006_1.tif	0	6	0:6	12.557	5.885	4.87481	3.87311	-1.00169	0	0.29777	1.1533	-0.298274
00000006_1.tif	0	6	0:6	13.833	2.729	4.87481	7.04579	2.17099	1	0.29777	2.09803	0.646455
00000006_1.tif	0	6	0:6	11.505	1.089	4.87481	8.77373	3.89892	1	0.29777	2.61255	1.16098
00000006_1.tif	0	6	0:6	11.615	1.099	4.87481	8.7454	3.87059	1	0.29777	2.60412	1.15255
00000006_1.tif	0	6	0:6	12.318	0.812	4.87481	8.94546	4.07065	1	0.29777	2.66369	1.21212
00000006_1.tif	0	6	0:6	12.484	0.719	4.87481	9.02659	4.15178	1	0.29777	2.68785	1.23628
00000006_1.tif	0	6	0:6	15.698	5.193	4.87481	5.26196	0.387149	1	0.29777	1.56685	0.115281
00000006_1.tif	0	6	0:6	16.724	5.469	4.87481	5.63789	0.763087	1	0.29777	1.6788	0.227224
00000006_1.tif	0	6	0:6	16.781	5.604	4.87481	5.57478	0.699969	1	0.29777	1.66	0.20843
00000006_1.tif	0	6	0:6	16.698	6.526	4.87481	4.86889	-0.00591612	0	0.29777	1.44981	-0.00176164
00000006_1.tif	0	6	0:6	16.818	6.958	4.87481	4.69253	-0.18228	0	0.29777	1.39729	-0.0542775
00000006_1.tif	0	6	0:6	16.948	7.938	4.87481	4.30704	-0.56777	0	0.29777	1.28251	-0.169065
00000006_1.tif	0	6	0:6	17.016	7.76	4.87481	4.44491	-0.429901	0	0.29777	1.32356	-0.128012
00000006_1.tif	0	6	0:6	17.417	7.677	4.87481	4.84228	-0.0325244	0	0.29777	1.44189	-0.0096848
00000006_1.tif	0	6	0:6	17.797	7.115	4.87481	5.43578	0.560977	1	0.29777	1.61861	0.167042
00000006_1.tif	0	6	0:6	18.344	7.615	4.87481	5.71813	0.843319	1	0.29777	1.70269	0.251115
00000006_1.tif	0	6	0:6	18.349	7.427	4.87481	5.79485	0.920047	1	0.29777	1.72553	0.273962
00000006_1.tif	0	6	0:6	17.031	8.953	4.87481	4.07458	-0.80023	0	0.29777	1.21329	-0.238285
00000006_1.tif	0	6	0:6	17.333	9.333	4.87481	4.32019	-0.554619	0	0.29777	1.28642	-0.165149
00000006_1.tif	0	6	0:6	18.365	10.026	4.87481	5.34226	0.467455	1	0.29777	1.59077	0.139194
00000006_1.tif	0	6	0:6	16.073	10.635	4.87481	3.17405	-1.70076	0	0.29777	0.945137	-0.506434
00000006_1.tif	0	6	0:6	18.224	13.932	4.87481	6.68075	1.80595	1	0.29777	1.98933	0.537756
00000006_1.tif	0	6	0:6	18.099	13.823	4.87481	6.51502	1.64021	1	0.29777	1.93998	0.488406
00000006_1.tif	0	6	0:6	18.068	13.281	4.87481	6.16345	1.28864	1	0.29777	1.83529	0.383718
00000006_1.tif	0	6	0:6	17.323	11.932	4.87481	4.82436	-0.0504445	0	0.29777	1.43655	-0.0150209
00000006_1.tif	0	6	0:6	16.984	12.271	4.87481	4.69978	-0.175023	0	0.29777	1.39945	-0.0521165
00000006_1.tif	0	6	0:6	16.745	12.156	4.87481	4.43668	-0.438127	0	0.29777	1.32111	-0.130461
00000006_1.tif	0	6	0:6	16.073	15.135	4.87481	6.20311	1.32831	1	0.29777	1.8471	0.395529
00000006_1.tif	0	6	0:6	16.849	20.76	4.87481	11.673	6.79824	1	0.29777	3.47588	2.02431
00000006_1.tif	0	6	0:6	17.036	20.771	4.87481	11.7459	6.87108	1	0.29777	3.49757	2.046
00000006_1.tif	0	6	0:6	20.557	14.217	4.87481	8.76258	3.88777	1	0.29777	2.60923	1.15766
00000006_1.tif	0	6	0:6	20.557	14.05	4.87481	8.67823	3.80343	1	0.29777	2.58412	1.13255
00000006_1.tif	0	6	0:6	19.266	13.509	4.87481	7.29134	2.41653	1	0.29777	2.17114	0.719571
00000006_1.tif	0	6	0:6	19.245	13.342	4.87481	7.18802	2.31321	1	0.29777	2.14038	0.688804
00000006_1.tif	0	6	0:6	22.814	12.554	4.87481	10.1827	5.30791	1	0.29777	3.03211	1.58054
00000006_1.tif	0	6	0:6	22.391	12.019	4.87481	9.63606	4.76126	1	0.29777	2.86933	1.41776
00000006_1.tif	0	6	0:6	22.925	12.144	4.87481	10.1845	5.30966	1	0.29777	3.03263	1.58106
00000006_1.tif	0	6	0:6	22.946	11.248	4.87481	10.0307	5.15588	1	0.29777	2.98684	1.53526
00000006_1.tif	0	6	0:6	22.342	10.387	4.87481	9.33422	4.45941	1	0.29777	2.77945	1.32788
00000006_1.tif	0	6	0:6	18.641	10.477	4.87481	5.65965	0.78484	1	0.29777	1.68527	0.233702
00000006_1.tif	0	6	0:6	19.057	9.839	4.87481	6.027	1.1522	1	0.29777	1.79466	0.34309
00000006_1.tif	0	6	0:6	19.224	11.54	4.87481	6.45236	1.57755	1	0.29777	1.92132	0.469748
00000006_1.tif	0	6	0:6	19.391	10.762	4.87481	6.44334	1.56854	1	0.29777	1.91863	0.467063
00000006_1.tif	0	6	0:6	20.648	10.214	4.87481	7.63243	2.75762	1	0.29777	2.27271	0.821136
00000006_1.tif	0	6	0:6	21.148	9.88	4.87481	8.1184	3.2436	1	0.29777	2.41742	0.965846
00000006_1.tif	0	6	0:6	21.175	9.7	4.87481	8.14405	3.26924	1	0.29777	2.42505	0.973483
00000006_1.tif	0	6	0:6	22.842	8.443	4.87481	9.89492	5.02012	1	0.29777	2.94641	1.49484
00000006_1.tif	0	6	0:6	23.002	8.207	4.87481	10.0865	5.21169	1	0.29777	3.00345	1.55188
00000006_1.tif	0	6	0:6	23.016	7.311	4.87481	10.2736	5.3988	1	0.29777	3.05917	1.6076
00000006_1.tif	0	6	0:6	21.398	8.658	4.87481	8.43527	3.56046	1	0.29777	2.51177	1.0602
00000006_1.tif	0	6	0:6	19.384	8.72	4.87481	6.43263	1.55782	1	0.29777	1.91544	0.463872
00000006_1.tif	0	6	0:6	19.516	8.915	4.87481	6.53589	1.66108	1	0.29777	1.94619	0.49462
00000006_1.tif	0	6	0:6	19.898	8.672	4.87481	6.94787	2.07307	1	0.29777	2.06887	0.617297
00000006_1.tif	0	6	0:6	21.203	7.408	4.87481	8.49521	3.6204	1	0.29777	2.52962	1.07805
00000006_1.tif	0	6	0:6	21.28	7.234	4.87481	8.61806	3.74326	1	0.29777	2.5662	1.11463
00000006_1.tif	0	6	0:6	19.877	6.651	4.87481	7.50612	2.63131	1	0.29777	2.2351	0.783525
00000006_1.tif	0	6	0:6	19.495	6.672	4.87481	7.15042	2.27562	1	0.29777	2.12918	0.67761
00000006_1.tif	0	6	0:6	19.731	6.533	4.87481	7.42323	2.54843	1	0.29777	2.21042	0.758845
00000006_1.tif	0	6	0:6	20.349	6.241	4.87481	8.10674	3.23194	1	0.29777	2.41394	0.962373
00000006_1.tif	0	6	0:6	20.328	6.054	4.87481	8.17018	3.29537	1	0.29777	2.43283	0.981263
00000006_1.tif	0	6	0:6	21.807	5.2	4.87481	9.87573	5.00092	1	0.29777	2.9407	1.48912
00000006_1.tif	0	6	0:6	21.668	5.061	4.87481	9.81774	4.94293	1	0.29777	2.92343	1.47186
00000006_1.tif	0	6	0:6	21.509	4.984	4.87481	9.71553	4.84072	1	0.29777	2.89299	1.44142
00000006_1.tif	0	6	0:6	21.321	4.991	4.87481	9.54844	4.67364	1	0.29777	2.84324	1.39167
00000006_1.tif	0	6	0:6	21.453	5.109	4.87481	9.60596	4.73115	1	0.29777	2.86037	1.4088
00000006_1.tif	0	6	0:6	21.293	4.852	4.87481	9.59405	4.71924	1	0.29777	2.85682	1.40525
00000006_1.tif	0	6	0:6	21.259	5.089	4.87481	9.44614	4.57133	1	0.29777	2.81278	1.36121
00000006_1.tif	0	6	0:6	21.175	4.929	4.87481	9.45329	4.57849	1	0.29777	2.81491	1.36334
00000006_4.tif	1	5	1:5	10.646	4.312	4.93239	7.79659	2.8642	1	0.29777	2.32159	0.852874
00000006_4.tif	1	5	1:5	11.929	5.78	4.93239	5.86876	0.936372	1	0.29777	1.74754	0.278824
00000006_4.tif	1	5	1:5	11.998	6.009	4.93239	5.63751	0.705125	1	0.29777	1.67868	0.209965
00000006_4.tif	1	5	1:5	12.29	6.05	4.93239	5.45324	0.520858	1	0.29777	1.62381	0.155096
00000006_4.tif	1	5	1:5	10.172	6.634	4.93239	6.35529	1.42291	1	0.29777	1.89242	0.4237
00000006_4.tif	1	5	1:5	10.339	7.023	4.93239	5.97715	1.04476	1	0.29777	1.77982	0.311099
00000006_4.tif	1	5	1:5	11.797	7.842	4.93239	4.33882	-0.593566	0	0.29777	1.29197	-0.176746
00000006_4.tif	1	5	1:5	11.929	8.745	4.93239	3.67188	-1.2605	0	0.29777	1.09338	-0.37534
00000006_4.tif	1	5	1:5	9.936	9.04	4.93239	5.33559	0.403202	1	0.29777	1.58878	0.120061
00000006_4.tif	1	5	1:5	9.345	10.457	4.93239	5.63926	0.706874	1	0.29777	1.6792	0.210486
00000006_4.tif	1	5	1:5	9.589	12.332	4.93239	5.5995	0.667119	1	0.29777	1.66736	0.198648
00000006_4.tif	1	5	1:5	9.484	12.158	4.93239	5.65618	0.723799	1	0.29777	1.68424	0.215526
00000006_4.tif	1	5	1:5	9.707	12.075	4.93239	5.41983	0.487446	1	0.29777	1.61386	0.145147
00000006_4.tif	1	5	1:5	7.318	10.908	4.93239	7.6568	2.72442	1	0.29777	2.27997	0.81125
00000006_4.tif	1	5	1:5	9.99	13.729	4.93239	5.78246	0.850078	1	0.29777	1.72184	0.253128
00000006_4.tif	1	5	1:5	9.922	14.01	4.93239	5.98716	1.05477	1	0.29777	1.7828	0.31408
00000006_4.tif	1	5	1:5	11.531	14.255	4.93239	4.87976	-0.0526299	0	0.29777	1.45304	-0.0156716
00000006_4.tif	1	5	1:5	11.667	13.943	4.93239	4.56438	-0.368005	0	0.29777	1.35914	-0.109581
00000006_4.tif	1	5	1:5	11.901	15.854	4.93239	5.91748	0.985095	1	0.29777	1.76205	0.293332
00000006_4.tif	1	5	1:5	11.833	15.661	4.93239	5.79002	0.857639	1	0.29777	1.7241	0.255379
00000006_4.tif	1	5	1:5	12.297	16.823	4.93239	6.59386	1.66148	1	0.29777	1.96345	0.494738
00000006_4.tif	1	5	1:5	11.109	16.078	4.93239	6.54425	1.61186	1	0.29777	1.94868	0.479964
00000006_4.tif	1	5	1:5	12.172	12.125	4.93239	3.10077	-1.83161	0	0.29777	0.923317	-0.545399
00000006_4.tif	1	5	1:5	12.125	11.943	4.93239	3.07085	-1.86154	0	0.29777	0.914407	-0.554309
00000006_4.tif	1	5	1:5	12.38	11.927	4.93239	2.82944	-2.10294	0	0.29777	0.842523	-0.626194
00000006_4.tif	1	5	1:5	12.542	12.016	4.93239	2.7204	-2.21198	0	0.29777	0.810054	-0.658662
00000006_4.tif	1	5	1:5	12.333	10.401	4.93239	2.67052	-2.26186	0	0.29777	0.795202	-0.673515
00000006_4.tif	1	5	1:5	12.312	10.219	4.93239	2.72403	-2.20836	0	0.29777	0.811134	-0.657583
00000006_4.tif	1	5	1:5	11.979	17.406	4.93239	7.25596	2.32357	1	0.29777	2.16061	0.69189
00000006_4.tif	1	5	1:5	13.255	16.755	4.93239	6.20103	1.26864	1	0.29777	1.84648	0.377763
00000006_4.tif	1	5	1:5	13.531	16.307	4.93239	5.69582	0.763433	1	0.29777	1.69604	0.227328
00000006_4.tif	1	5	1:5	14.339	15.766	4.93239	5.00941	0.0770245	1	0.29777	1.49165	0.0229356
00000006_4.tif	1	5	1:5	15.401	16.094	4.93239	5.31418	0.381797	1	0.29777	1.5824	0.113688
00000006_4.tif	1	5	1:5	15.234	15.224	4.93239	4.43463	-0.497757	0	0.29777	1.3205	-0.148217
00000006_4.tif	1	5	1:5	15.969	14.573	4.93239	3.90489	-1.02749	0	0.29777	1.16276	-0.305956
00000006_4.tif	1	5	1:5	16.068	14.49	4.93239	3.85163	-1.08075	0	0.29777	1.1469	-0.321815
00000006_4.tif	1	5	1:5	15.682	12.661	4.93239	1.99393	-2.93845	0	0.29777	0.593733	-0.874984
00000006_4.tif	1	5	1:5	15.984	12.448	4.93239	1.93543	-2.99695	0	0.29777	0.576314	-0.892402
00000006_4.tif	1	5	1:5	14.354	13.042	4.93239	2.32904	-2.60335	0	0.29777	0.693518	-0.775198
00000006_4.tif	1	5	1:5	15.286	11.682	4.93239	0.938386	-3.994	0	0.29777	0.279423	-1.18929
00000006_4.tif	1	5	1:5	15.385	11	4.93239	0.458399	-4.47399	0	0.29777	0.136498	-1.33222
00000006_4.tif	1	5	1:5	15.203	10.943	4.93239	0.271582	-4.6608	0	0.29777	0.0808691	-1.38785
00000006_4.tif	1	5	1:5	15.953	10.094	4.93239	1.20526	-3.72713	0	0.29777	0.35889	-1.10983
00000006_4.tif	1	5	1:5	15.938	9.927	4.93239	1.29854	-3.63385	0	0.29777	0.386665	-1.08205
00000006_4.tif	1	5	1:5	15.37	10.13	4.93239	0.775696	-4.15669	0	0.29777	0.230979	-1.23774
00000006_4.tif	1	5	1:5	15.073	10.297	4.93239	0.509707	-4.42268	0	0.29777	0.151775	-1.31694
00000006_4.tif	1	5	1:5	15.604	9.339	4.93239	1.58829	-3.3441	0	0.29777	0.472945	-0.995771
00000006_4.tif	1	5	1:5	14.302	10.557	4.93239	0.713571	-4.21881	0	0.29777	0.21248	-1.25624
00000006_4.tif	1	5	1:5	14.177	10.432	4.93239	0.876604	-4.05578	0	0.29777	0.261026	-1.20769
00000006_4.tif	1	5	1:5	14.104	10.286	4.93239	1.00897	-3.92342	0	0.29777	0.300441	-1.16828
00000006_4.tif	1	5	1:5	13.979	10.297	4.93239	1.11356	-3.81882	0	0.29777	0.331586	-1.13713
00000006_4.tif	1	5	1:5	13.818	10.135	4.93239	1.33213	-3.60025	0	0.29777	0.396669	-1.07205
00000006_4.tif	1	5	1:5	12.984	10.932	4.93239	1.99457	-2.93781	0	0.29777	0.593924	-0.874792
00000006_4.tif	1	5	1:5	12.833	11.036	4.93239	2.1543	-2.77809	0	0.29777	0.641485	-0.827231
00000006_4.tif	1	5	1:5	14.365	2.88	4.93239	7.94039	3.008	1	0.29777	2.36441	0.895693
00000006_4.tif	1	5	1:5	14.547	2.76	4.93239	8.04834	3.11595	1	0.29777	2.39655	0.927836
00000006_4.tif	1	5	1:5	14.49	2.609	4.93239	8.20229	3.26991	1	0.29777	2.4424	0.97368
00000006_4.tif	1	5	1:5	16.352	1.252	4.93239	9.64396	4.71157	1	0.29777	2.87168	1.40296
00000006_4.tif	1	5	1:5	20.387	2.182	4.93239	10.1744	5.24203	1	0.29777	3.02964	1.56092
00000006_4.tif	1	5	1:5	20.609	2.231	4.93239	10.2533	5.32089	1	0.29777	3.05312	1.5844
00000006_4.tif	1	5	1:5	19.748	4.03	4.93239	8.28151	3.34912	1	0.29777	2.46598	0.997268
00000006_4.tif	1	5	1:5	19.783	4.224	4.93239	8.14437	3.21199	1	0.29777	2.42515	0.956434
00000006_4.tif	1	5	1:5	17.429	4.675	4.93239	6.5959	1.66352	1	0.29777	1.96406	0.495345
00000006_4.tif	1	5	1:5	19.825	5.804	4.93239	6.96148	2.0291	1	0.29777	2.07292	0.604205
00000006_4.tif	1	5	1:5	19.352	6.276	4.93239	6.29336	1.36097	1	0.29777	1.87397	0.405256
00000006_4.tif	1	5	1:5	20.248	6.727	4.93239	6.66183	1.72944	1	0.29777	1.98369	0.514977
00000006_4.tif	1	5	1:5	19.832	7.408	4.93239	5.9233	0.990915	1	0.29777	1.76378	0.295065
00000006_4.tif	1	5	1:5	18.339	6.79	4.93239	5.23252	0.300136	1	0.29777	1.55809	0.0893714
00000006_4.tif	1	5	1:5	18.241	6.595	4.93239	5.3226	0.390217	1	0.29777	1.58491	0.116195
00000006_4.tif	1	5	1:5	17.859	6.929	4.93239	4.82542	-0.106968	0	0.29777	1.43686	-0.031852
00000006_4.tif	1	5	1:5	16.839	7.269	4.93239	3.99062	-0.94177	0	0.29777	1.18829	-0.280431
00000006_4.tif	1	5	1:5	16.866	7.568	4.93239	3.74247	-1.18991	0	0.29777	1.1144	-0.35432
00000006_4.tif	1	5	1:5	21.408	8.141	4.93239	6.96065	2.02827	1	0.29777	2.07267	0.603957
00000006_4.tif	1	5	1:5	21.054	8.703	4.93239	6.43049	1.49811	1	0.29777	1.91481	0.446091
00000006_4.tif	1	5	1:5	22.005	9.731	4.93239	7.11135	2.17897	1	0.29777	2.11755	0.648831
00000006_4.tif	1	5	1:5	22.123	9.599	4.93239	7.24868	2.3163	1	0.29777	2.15844	0.689724
00000006_4.tif	1	5	1:5	19.866	8.703	4.93239	5.32133	0.38894	1	0.29777	1.58453	0.115815
00000006_4.tif	1	5	1:5	19.832	8.835	4.93239	5.23924	0.306852	1	0.29777	1.56009	0.0913713
00000006_4.tif	1	5	1:5	19.637	8.759	4.93239	5.08891	0.156526	1	0.29777	1.51532	0.0466086
00000006_4.tif	1	5	1:5	19.734	8.905	4.93239	5.12223	0.189847	1	0.29777	1.52525	0.0565308
00000006_4.tif	1	5	1:5	20.776	9.741	4.93239	5.89732	0.964931	1	0.29777	1.75604	0.287328
00000006_4.tif	1	5	1:5	20.797	9.887	4.93239	5.89368	0.961292	1	0.29777	1.75496	0.286244
00000006_4.tif	1	5	1:5	20.498	10.137	4.93239	5.56329	0.630903	1	0.29777	1.65658	0.187864
00000006_4.tif	1	5	1:5	20.304	10.727	4.93239	5.33046	0.398074	1	0.29777	1.58725	0.118535
00000006_4.tif	1	5	1:5	16.47	11.262	4.93239	1.5666	-3.36578	0	0.29777	0.466487	-1.00223
00000006_4.tif	1	5	1:5	16.582	11.193	4.93239	1.65604	-3.27634	0	0.29777	0.49312	-0.975596
00000006_4.tif	1	5	1:5	16.644	11.318	4.93239	1.74938	-3.183	0	0.29777	0.520914	-0.947803
00000006_4.tif	1	5	1:5	16.859	11.325	4.93239	1.95755	-2.97483	0	0.29777	0.5829	-0.885816
00000006_4.tif	1	5	1:5	16.415	11.665	4.93239	1.68223	-3.25015	0	0.29777	0.500918	-0.967798
00000006_4.tif	1	5	1:5	16.769	12.061	4.93239	2.19539	-2.737	0	0.29777	0.65372	-0.814996
00000006_4.tif	1	5	1:5	17.366	13.033	4.93239	3.27435	-1.65804	0	0.29777	0.975003	-0.493714
00000006_4.tif	1	5	1:5	18.214	13.345	4.93239	4.12188	-0.810504	0	0.29777	1.22737	-0.241344
00000006_4.tif	1	5	1:5	18.575	13.068	4.93239	4.2573	-0.675081	0	0.29777	1.2677	-0.201019
00000006_4.tif	1	5	1:5	18.929	11.894	4.93239	4.10432	-0.828066	0	0.29777	1.22214	-0.246573
00000006_4.tif	1	5	1:5	19.068	12.512	4.93239	4.4387	-0.493685	0	0.29777	1.32171	-0.147005
00000006_4.tif	1	5	1:5	20.623	12.29	4.93239	5.84297	0.910581	1	0.29777	1.73986	0.271144
00000006_4.tif	1	5	1:5	20.679	11.651	4.93239	5.76856	0.83618	1	0.29777	1.71771	0.248989
00000006_4.tif	1	5	1:5	21.943	11.609	4.93239	7.01615	2.08376	1	0.29777	2.0892	0.620481
00000006_4.tif	1	5	1:5	21.88	12.075	4.93239	7.02326	2.09087	1	0.29777	2.09131	0.622598
00000006_4.tif	1	5	1:5	22.38	12.359	4.93239	7.56893	2.63654	1	0.29777	2.2538	0.785083
00000006_4.tif	1	5	1:5	21.852	12.714	4.93239	7.14015	2.20777	1	0.29777	2.12612	0.657407
00000006_4.tif	1	5	1:5	21.776	12.915	4.93239	7.12412	2.19174	1	0.29777	2.12135	0.652634
00000006_4.tif	1	5	1:5	22.311	13.519	4.93239	7.82565	2.89327	1	0.29777	2.33024	0.861528
00000006_4.tif	1	5	1:5	21.464	13.019	4.93239	6.85984	1.92745	1	0.29777	2.04265	0.573938
00000006_4.tif	1	5	1:5	21.339	12.894	4.93239	6.70154	1.76915	1	0.29777	1.99552	0.526801
00000006_4.tif	1	5	1:5	21.318	13.116	4.93239	6.75456	1.82218	1	0.29777	2.01131	0.542589
00000006_4.tif	1	5	1:5	21.054	12.852	4.93239	6.4179	1.48551	1	0.29777	1.91106	0.442341
00000006_4.tif	1	5	1:5	20.227	12.686	4.93239	5.58232	0.649938	1	0.29777	1.66225	0.193532
00000006_4.tif	1	5	1:5	20.061	13.068	4.93239	5.57091	0.638522	1	0.29777	1.65885	0.190133
00000006_4.tif	1	5	1:5	19.491	14.276	4.93239	5.70147	0.769082	1	0.29777	1.69773	0.22901
00000006_4.tif	1	5	1:5	20.033	13.686	4.93239	5.82579	0.893402	1	0.29777	1.73474	0.266028
00000006_4.tif	1	5	1:5	20.158	13.352	4.93239	5.77944	0.847051	1	0.29777	1.72094	0.252226
00000006_4.tif	1	5	1:5	20.29	13.498	4.93239	5.96282	1.03044	1	0.29777	1.77555	0.306833
00000006_4.tif	1	5	1:5	20.332	13.401	4.93239	5.95726	1.02488	1	0.29777	1.77389	0.305178
00000006_4.tif	1	5	1:5	20.484	13.332	4.93239	6.06517	1.13279	1	0.29777	1.80603	0.33731
00000006_4.tif	1	5	1:5	20.575	13.589	4.93239	6.25831	1.32593	1	0.29777	1.86354	0.394821
00000006_4.tif	1	5	1:5	22.054	14.589	4.93239	8.03154	3.09916	1	0.29777	2.39155	0.922836
00000006_4.tif	1	5	1:5	21.901	14.894	4.93239	8.0479	3.11552	1	0.29777	2.39642	0.927708
00000006_4.tif	1	5	1:5	21.97	15.734	4.93239	8.56259	3.63021	1	0.29777	2.54968	1.08097
00000006_4.tif	1	5	1:5	21.998	15.894	4.93239	8.67848	3.74609	1	0.29777	2.58419	1.11547
00000006_4.tif	1	5	1:5	22.095	15.991	4.93239	8.81398	3.8816	1	0.29777	2.62454	1.15582
00000006_4.tif	1	5	1:5	22.276	15.929	4.93239	8.92506	3.99267	1	0.29777	2.65761	1.1889
00000006_4.tif	1	5	1:5	16.561	16.55	4.93239	5.96788	1.03549	1	0.29777	1.77706	0.308339
00000006_4.tif	1	5	1:5	22.04	16.8	4.93239	9.2717	4.33931	1	0.29777	2.76083	1.29212
00000006_4.tif	1	5	1:5	22.29	17.085	4.93239	9.64691	4.71452	1	0.29777	2.87256	1.40384
00000006_4.tif	1	5	1:5	18.859	17.245	4.93239	7.52794	2.59556	1	0.29777	2.2416	0.772879
00000006_4.tif	1	5	1:5	18.88	17.502	4.93239	7.75976	2.82737	1	0.29777	2.31062	0.841907
00000006_4.tif	1	5	1:5	21.193	17.835	4.93239	9.39199	4.4596	1	0.29777	2.79665	1.32794
00000006_4.tif	1	5	1:5	21.255	18.036	4.93239	9.58405	4.65167	1	0.29777	2.85384	1.38513
00000006_4.tif	1	5	1:5	20.929	18.557	4.93239	9.7816	4.84921	1	0.29777	2.91267	1.44395
00000006_4.tif	1	5	1:5	20.977	19.391	4.93239	10.483	5.55059	1	0.29777	3.12152	1.6528
00000006_4.tif	1	5	1:5	21.2	19.398	4.93239	10.6179	5.68554	1	0.29777	3.1617	1.69298
00000006_4.tif	1	5	1:5	20.318	19.286	4.93239	10.031	5.09864	1	0.29777	2.98694	1.51822
00000006_4.tif	1	5	1:5	20.137	19.342	4.93239	9.98367	5.05128	1	0.29777	2.97284	1.50412
00000006_4.tif	1	5	1:5	24.266	17.109	4.93239	11.2331	6.30072	1	0.29777	3.34488	1.87616
00000006_4.tif	1	5	1:5	24.526	15.047	4.93239	10.4548	5.52243	1	0.29777	3.11313	1.64441
00000006_4.tif	1	5	1:5	24.557	14.672	4.93239	10.3368	5.40442	1	0.29777	3.07799	1.60927
00000006_4.tif	1	5	1:5	24.651	13.88	4.93239	10.1562	5.22386	1	0.29777	3.02422	1.55551
00000006_4.tif	1	5	1:5	24.745	13.682	4.93239	10.188	5.25563	1	0.29777	3.03369	1.56497
00000006_4.tif	1	5	1:5	25.089	13.505	4.93239	10.4712	5.53884	1	0.29777	3.11802	1.6493
00000006_4.tif	1	5	1:5	22.734	12.891	4.93239	8.03756	3.10518	1	0.29777	2.39335	0.924629
00000006_4.tif	1	5	1:5	22.609	12.714	4.93239	7.87198	2.9396	1	0.29777	2.34404	0.875324
00000006_4.tif	1	5	1:5	23.13	10.349	4.93239	8.16829	3.23591	1	0.29777	2.43227	0.963557
00000006_4.tif	1	5	1:5	25.599	9.297	4.93239	10.7304	5.79797	1	0.29777	3.19518	1.72646
00000006_4.tif	1	5	1:5	25.453	9.193	4.93239	10.601	5.66866	1	0.29777	3.15667	1.68796
00000006_9.tif	4	2	4:2	6.406	15.542	4.5992	9.77172	5.17252	1	0.29777	2.90972	1.54022
00000006_9.tif	4	2	4:2	7.582	15.668	4.5992	8.74857	4.14937	1	0.29777	2.60506	1.23556
00000006_9.tif	4	2	4:2	7.526	19.307	4.5992	10.8839	6.28469	1	0.29777	3.2409	1.87139
00000006_9.tif	4	2	4:2	9.144	20.009	4.5992	10.3145	5.71531	1	0.29777	3.07135	1.70185
00000006_9.tif	4	2	4:2	9.241	19.703	4.5992	10.0137	5.4145	1	0.29777	2.98178	1.61228
00000006_9.tif	4	2	4:2	9.22	19.509	4.5992	9.87552	5.27632	1	0.29777	2.94063	1.57113
00000006_9.tif	4	2	4:2	14.72	20.675	4.5992	8.85639	4.25718	1	0.29777	2.63717	1.26766
00000006_9.tif	4	2	4:2	12.748	21.682	4.5992	10.1983	5.59908	1	0.29777	3.03674	1.66724
00000006_9.tif	4	2	4:2	11.998	21.439	4.5992	10.1934	5.59419	1	0.29777	3.03528	1.66578
00000006_9.tif	4	2	4:2	10.568	20.8	4.5992	10.1972	5.59804	1	0.29777	3.03643	1.66693
00000006_9.tif	4	2	4:2	10.651	20.689	4.5992	10.0601	5.46086	1	0.29777	2.99558	1.62608
00000006_9.tif	4	2	4:2	11.283	18.3	4.5992	7.68143	3.08223	1	0.29777	2.2873	0.917794
00000006_9.tif	4	2	4:2	11.151	18.411	4.5992	7.84647	3.24727	1	0.29777	2.33644	0.966939
00000006_9.tif	4	2	4:2	13.512	17.703	4.5992	6.1674	1.5682	1	0.29777	1.83647	0.466962
00000006_9.tif	4	2	4:2	13.832	17.543	4.5992	5.92024	1.32104	1	0.29777	1.76287	0.393367
00000006_9.tif	4	2	4:2	13.248	4.852	4.5992	7.33621	2.73701	1	0.29777	2.1845	0.815
00000006_9.tif	4	2	4:2	12.72	2.807	4.5992	9.44601	4.84681	1	0.29777	2.81274	1.44323
00000006_9.tif	4	2	4:2	7.71	5.443	4.5992	10.0494	5.45022	1	0.29777	2.99242	1.62291
00000006_9.tif	4	2	4:2	7.502	4.88	4.5992	10.5729	5.97366	1	0.29777	3.14828	1.77878
00000006_9.tif	4	2	4:2	15.12	3.095	4.5992	8.76033	4.16113	1	0.29777	2.60856	1.23906
00000006_9.tif	4	2	4:2	15.043	2.998	4.5992	8.86049	4.26129	1	0.29777	2.63839	1.26888
00000006_9.tif	4	2	4:2	18.349	3.54	4.5992	8.79922	4.20002	1	0.29777	2.62014	1.25064
00000006_9.tif	4	2	4:2	18.335	3.144	4.5992	9.16968	4.57047	1	0.29777	2.73045	1.36095
00000006_9.tif	4	2	4:2	16.161	2.45	4.5992	9.42563	4.82643	1	0.29777	2.80667	1.43717
00000006_9.tif	4	2	4:2	16.363	1.929	4.5992	9.96165	5.36245	1	0.29777	2.96628	1.59678
00000006_9.tif	4	2	4:2	18.88	2.714	4.5992	9.75667	5.15747	1	0.29777	2.90524	1.53574
00000006_9.tif	4	2	4:2	19.03	9.873	4.5992	4.0865	-0.512698	0	0.29777	1.21684	-0.152666
00000006_9.tif	4	2	4:2	18.87	10.075	4.5992	3.85006	-0.74914	0	0.29777	1.14643	-0.223072
00000006_9.tif	4	2	4:2	19.582	20.929	4.5992	9.97472	5.37552	1	0.29777	2.97017	1.60067
00000006_9.tif	4	2	4:2	19.595	20.693	4.5992	9.76588	5.16668	1	0.29777	2.90799	1.53848
00000006_9.tif	4	2	4:2	15.561	20.644	4.5992	8.79566	4.19646	1	0.29777	2.61908	1.24958
00000006_9.tif	4	2	4:2	15.408	20.825	4.5992	8.97611	4.37691	1	0.29777	2.67282	1.30331
00000006_9.tif	4	2	4:2	15.373	20.637	4.5992	8.78836	4.18916	1	0.29777	2.61691	1.24741
00000006_9.tif	4	2	4:2	15.526	22.248	4.5992	10.3993	5.80006	1	0.29777	3.09659	1.72708
00000006_9.tif	4	2	4:2	15.45	22.262	4.5992	10.413	5.8138	1	0.29777	3.10068	1.73118
00000006_9.tif	4	2	4:2	24.512	12.634	4.5992	9.09295	4.49375	1	0.29777	2.70761	1.3381
00000006_9.tif	4	2	4:2	24.45	11.453	4.5992	9.00571	4.40651	1	0.29777	2.68163	1.31213
00000006_9.tif	4	2	4:2	24.547	11.28	4.5992	9.11178	4.51258	1	0.29777	2.71322	1.34371
00000006_9.tif	4	2	4:2	24.283	10.55	4.5992	8.92504	4.32584	1	0.29777	2.65761	1.2881
00000006_9.tif	4	2	4:2	25.207	9.929	4.5992	9.94117	5.34197	1	0.29777	2.96018	1.59068
00000006_9.tif	4	2	4:2	24.998	9.894	4.5992	9.74315	5.14395	1	0.29777	2.90122	1.53171
00000006_9.tif	4	2	4:2	23.832	8.089	4.5992	9.18397	4.58477	1	0.29777	2.73471	1.36521
00000006_9.tif	4	2	4:2	23.734	7.964	4.5992	9.14703	4.54783	1	0.29777	2.72371	1.35421
00000006_9.tif	4	2	4:2	23.845	7.901	4.5992	9.27429	4.67508	1	0.29777	2.7616	1.3921
00000006_9.tif	4	2	4:2	22.366	7.005	4.5992	8.4412	3.842	1	0.29777	2.51354	1.14403
00000006_9.tif	4	2	4:2	22.193	6.839	4.5992	8.39808	3.79888	1	0.29777	2.5007	1.13119
00000006_9.tif	4	2	4:2	23.707	6.401	4.5992	9.88985	5.29065	1	0.29777	2.9449	1.5754
00000006_9.tif	4	2	4:2	22.887	5.672	4.5992	9.66539	5.06619	1	0.29777	2.87806	1.50856
00000006_9.tif	4	2	4:2	22.741	5.7	4.5992	9.53547	4.93627	1	0.29777	2.83938	1.46987
00000006_9.tif	4	2	4:2	21.651	4.516	4.5992	9.60146	5.00226	1	0.29777	2.85903	1.48952
00000006_9.tif	4	2	4:2	21.29	4.488	4.5992	9.39441	4.79521	1	0.29777	2.79737	1.42787
0000006_11.tif	5	1	5:1	10.74	16.417	4.55738	7.37025	2.81287	1	0.29777	2.19464	0.837587
0000006_11.tif	5	1	5:1	10.686	16.189	4.55738	7.22183	2.66445	1	0.29777	2.15045	0.793394
0000006_11.tif	5	1	5:1	10.47	15.446	4.55738	6.79939	2.24201	1	0.29777	2.02465	0.667603
0000006_11.tif	5	1	5:1	6.115	9.568	4.55738	9.07451	4.51712	1	0.29777	2.70212	1.34506
0000006_11.tif	5	1	5:1	6.219	9.583	4.55738	8.96951	4.41213	1	0.29777	2.67085	1.3138
0000006_11.tif	5	1	5:1	11.79	1.613	4.55738	9.50247	4.94509	1	0.29777	2.82955	1.4725
0000006_11.tif	5	1	5:1	12.533	3.821	4.55738	7.17478	2.6174	1	0.29777	2.13644	0.779384
0000006_11.tif	5	1	5:1	12.651	4.036	4.55738	6.93167	2.37429	1	0.29777	2.06404	0.706992
0000006_11.tif	5	1	5:1	12.887	4.134	4.55738	6.75797	2.20059	1	0.29777	2.01232	0.655269
0000006_11.tif	5	1	5:1	16.255	5.849	4.55738	4.78741	0.230033	1	0.29777	1.42555	0.068497
0000006_11.tif	5	1	5:1	16.276	6.016	4.55738	4.63026	0.0728833	1	0.29777	1.37875	0.0217025
0000006_11.tif	5	1	5:1	11.745	19.526	4.55738	9.63905	5.08167	1	0.29777	2.87022	1.51317
0000006_11.tif	5	1	5:1	11.776	19.724	4.55738	9.81393	5.25655	1	0.29777	2.92229	1.56524
0000006_11.tif	5	1	5:1	23.047	16.932	4.55738	10.1888	5.6314	1	0.29777	3.03391	1.67686
0000006_11.tif	5	1	5:1	22.87	14.401	4.55738	8.65542	4.09804	1	0.29777	2.57732	1.22027
0000006_11.tif	5	1	5:1	25.276	10.266	4.55738	10.1378	5.58044	1	0.29777	3.01874	1.66169
0000006_11.tif	5	1	5:1	25.036	9.432	4.55738	9.95301	5.39563	1	0.29777	2.96371	1.60666
0000006_11.tif	5	1	5:1	23.411	9.568	4.55738	8.32291	3.76553	1	0.29777	2.47831	1.12126
0000006_11.tif	5	1	5:1	24.016	6.484	4.55738	9.74341	5.18603	1	0.29777	2.9013	1.54424
0000006_11.tif	5	1	5:1	23.703	6.474	4.55738	9.46345	4.90606	1	0.29777	2.81793	1.46088
0000006_11.tif	5	1	5:1	23.005	6.37	4.55738	8.88486	4.32748	1	0.29777	2.64564	1.28859
0000006_11.tif	5	1	5:1	22.776	4.464	4.55738	9.73586	5.17848	1	0.29777	2.89905	1.54199
0000006_11.tif	5	1	5:1	22.536	4.557	4.55738	9.49024	4.93286	1	0.29777	2.82591	1.46886
0000006_11.tif	5	1	5:1	19.714	3.172	4.55738	8.64206	4.08468	1	0.29777	2.57335	1.2163
0000006_11.tif	5	1	5:1	19.714	2.87	4.55738	8.89975	4.34237	1	0.29777	2.65008	1.29303
0000006_11.tif	5	1	5:1	17.547	1.443	4.55738	9.37596	4.81858	1	0.29777	2.79188	1.43483
0000006_12.tif	5	1	5:1	6.354	15.844	3.68226	10.1414	6.45911	1	0.29777	3.0198	1.92333
0000006_12.tif	5	1	5:1	6.384	15.613	3.68226	10.0061	6.32385	1	0.29777	2.97952	1.88305
0000006_12.tif	5	1	5:1	6.661	14.988	3.68226	9.48097	5.79871	1	0.29777	2.82315	1.72668
0000006_12.tif	5	1	5:1	6.842	15.148	3.68226	9.38709	5.70483	1	0.29777	2.79519	1.69873
0000006_12.tif	5	1	5:1	7.286	15.127	3.68226	8.98162	5.29935	1	0.29777	2.67446	1.57799
0000006_12.tif	5	1	5:1	8.474	15.37	3.68226	8.07583	4.39356	1	0.29777	2.40474	1.30827
0000006_12.tif	5	1	5:1	9.231	17.203	3.68226	8.65821	4.97595	1	0.29777	2.57815	1.48169
0000006_12.tif	5	1	5:1	9.05	17.314	3.68226	8.86402	5.18176	1	0.29777	2.63944	1.54297
0000006_12.tif	5	1	5:1	9.655	17.731	3.68226	8.76824	5.08598	1	0.29777	2.61092	1.51445
0000006_12.tif	5	1	5:1	9.488	19.467	3.68226	10.2577	6.5754	1	0.29777	3.05442	1.95796
0000006_12.tif	5	1	5:1	14.339	6.686	3.68226	4.39453	0.712265	1	0.29777	1.30856	0.212091
0000006_12.tif	5	1	5:1	20.078	16.085	3.68226	7.02008	3.33782	1	0.29777	2.09037	0.993903
0000006_12.tif	5	1	5:1	18.786	15.266	3.68226	5.55009	1.86783	1	0.29777	1.65265	0.556183
0000006_12.tif	5	1	5:1	18.859	15.092	3.68226	5.46484	1.78258	1	0.29777	1.62727	0.530799
0000006_12.tif	5	1	5:1	17.231	15.523	3.68226	4.95046	1.2682	1	0.29777	1.4741	0.377633
0000006_12.tif	5	1	5:1	18.953	15.078	3.68226	5.51689	1.83463	1	0.29777	1.64276	0.546297
0000006_12.tif	5	1	5:1	19.335	8.714	3.68226	4.66897	0.986711	1	0.29777	1.39028	0.293813
0000006_12.tif	5	1	5:1	19.578	8.797	3.68226	4.84472	1.16246	1	0.29777	1.44261	0.346145
0000006_12.tif	5	1	5:1	20.481	9.151	3.68226	5.53814	1.85588	1	0.29777	1.64909	0.552624
0000006_12.tif	5	1	5:1	20.398	8.804	3.68226	5.58595	1.90369	1	0.29777	1.66333	0.566862
0000006_12.tif	5	1	5:1	24.405	7.37	3.68226	9.83786	6.1556	1	0.29777	2.92942	1.83295
0000006_12.tif	5	1	5:1	24.453	7.509	3.68226	9.83254	6.15028	1	0.29777	2.92784	1.83137
0000006_12.tif	5	1	5:1	23.064	11.512	3.68226	7.82683	4.14457	1	0.29777	2.3306	1.23413
0000006_12.tif	5	1	5:1	23.356	12.526	3.68226	8.24645	4.56419	1	0.29777	2.45555	1.35908
0000006_12.tif	5	1	5:1	24.321	13.144	3.68226	9.31976	5.6375	1	0.29777	2.77515	1.67868
0000006_12.tif	5	1	5:1	24.585	12.54	3.68226	9.45886	5.7766	1	0.29777	2.81656	1.7201
0000006_12.tif	5	1	5:1	21.599	13.186	3.68226	6.71529	3.03303	1	0.29777	1.99961	0.903145
0000006_12.tif	5	1	5:1	21.974	13.693	3.68226	7.24456	3.5623	1	0.29777	2.15721	1.06075
0000006_12.tif	5	1	5:1	22.557	14.908	3.68226	8.28957	4.60731	1	0.29777	2.46839	1.37192
0000006_12.tif	5	1	5:1	23.092	14.977	3.68226	8.7956	5.11334	1	0.29777	2.61907	1.5226
0000006_12.tif	5	1	5:1	23.46	15.519	3.68226	9.37487	5.69261	1	0.29777	2.79156	1.69509
0000006_12.tif	5	1	5:1	23.71	15.297	3.68226	9.49152	5.80926	1	0.29777	2.82629	1.72982
00000007_7.tif	3	3	3:3	12.365	1.74	4.93239	8.46211	3.52972	1	0.29777	2.51976	1.05105
00000007_7.tif	3	3	3:3	12.214	1.849	4.93239	8.39531	3.46293	1	0.29777	2.49987	1.03116
00000007_7.tif	3	3	3:3	13.016	3.859	4.93239	6.24911	1.31673	1	0.29777	1.8608	0.392081
00000007_7.tif	3	3	3:3	14.443	5.005	4.93239	4.938	0.00561472	1	0.29777	1.47039	0.00167189
00000007_7.tif	3	3	3:3	10.828	2.286	4.93239	8.46746	3.53507	1	0.29777	2.52136	1.05264
00000007_7.tif	3	3	3:3	7.932	3.797	4.93239	8.95357	4.02119	1	0.29777	2.6661	1.19739
00000007_7.tif	3	3	3:3	7.609	3.849	4.93239	9.15644	4.22405	1	0.29777	2.72651	1.2578
00000007_7.tif	3	3	3:3	8.099	5.255	4.93239	7.8882	2.95581	1	0.29777	2.34887	0.880153
00000007_7.tif	3	3	3:3	8.099	5.901	4.93239	7.52224	2.58986	1	0.29777	2.2399	0.771181
00000007_7.tif	3	3	3:3	9.089	5.37	4.93239	7.04114	2.10875	1	0.29777	2.09664	0.627924
00000007_7.tif	3	3	3:3	6.089	6.891	4.93239	8.89404	3.96166	1	0.29777	2.64838	1.17966
00000007_7.tif	3	3	3:3	4.818	12.203	4.93239	9.88677	4.95438	1	0.29777	2.94398	1.47527
00000007_7.tif	3	3	3:3	15.62	21.464	4.93239	11.581	6.64858	1	0.29777	3.44846	1.97975
00000007_7.tif	3	3	3:3	15.724	21.224	4.93239	11.3535	6.42111	1	0.29777	3.38073	1.91201
00000007_7.tif	3	3	3:3	15.641	20.911	4.93239	11.0332	6.10085	1	0.29777	3.28537	1.81665
00000007_7.tif	3	3	3:3	15.661	20.703	4.93239	10.8287	5.89633	1	0.29777	3.22447	1.75575
00000007_7.tif	3	3	3:3	15.589	20.589	4.93239	10.7075	5.77512	1	0.29777	3.18837	1.71966
00000007_7.tif	3	3	3:3	14.839	21.068	4.93239	11.132	6.19966	1	0.29777	3.31479	1.84607
00000007_7.tif	3	3	3:3	14.464	21.13	4.93239	11.187	6.25463	1	0.29777	3.33116	1.86244
00000007_7.tif	3	3	3:3	14.203	21.234	4.93239	11.2936	6.36117	1	0.29777	3.36288	1.89416
00000007_7.tif	3	3	3:3	14.297	21.151	4.93239	11.209	6.27657	1	0.29777	3.33769	1.86897
00000007_7.tif	3	3	3:3	14.089	20.932	4.93239	10.9947	6.06232	1	0.29777	3.27389	1.80518
00000007_7.tif	3	3	3:3	14.398	19.922	4.93239	9.9791	5.04672	1	0.29777	2.97148	1.50276
00000007_7.tif	3	3	3:3	14.453	19.804	4.93239	9.86101	4.92862	1	0.29777	2.93631	1.4676
00000007_7.tif	3	3	3:3	17.161	17.783	4.93239	8.29778	3.36539	1	0.29777	2.47083	1.00211
00000007_7.tif	3	3	3:3	17.217	17.672	4.93239	8.21173	3.27935	1	0.29777	2.44521	0.976491
00000007_7.tif	3	3	3:3	12.974	18.415	4.93239	8.59842	3.66603	1	0.29777	2.56035	1.09163
00000007_7.tif	3	3	3:3	12.335	18.714	4.93239	9.02076	4.08837	1	0.29777	2.68611	1.2174
00000007_7.tif	3	3	3:3	12.134	18.755	4.93239	9.10949	4.17711	1	0.29777	2.71253	1.24382
00000007_7.tif	3	3	3:3	11.158	19.727	4.93239	10.3208	5.38836	1	0.29777	3.07321	1.60449
00000007_7.tif	3	3	3:3	11.03	19.908	4.93239	10.5333	5.60089	1	0.29777	3.13649	1.66778
00000007_7.tif	3	3	3:3	12.502	20.498	4.93239	10.732	5.7996	1	0.29777	3.19566	1.72695
00000007_7.tif	3	3	3:3	12.668	20.589	4.93239	10.793	5.86057	1	0.29777	3.21382	1.7451
00000007_7.tif	3	3	3:3	12.55	20.915	4.93239	11.1341	6.20172	1	0.29777	3.3154	1.84669
00000007_7.tif	3	3	3:3	12.786	21.45	4.93239	11.6257	6.69331	1	0.29777	3.46178	1.99307
00000007_7.tif	3	3	3:3	12.766	21.29	4.93239	11.4703	6.53787	1	0.29777	3.4155	1.94678
00000007_7.tif	3	3	3:3	8.901	20.297	4.93239	11.7439	6.81151	1	0.29777	3.49698	2.02826
00000007_7.tif	3	3	3:3	9.859	19.727	4.93239	10.8046	5.87223	1	0.29777	3.21729	1.74857
00000007_7.tif	3	3	3:3	10.29	19.595	4.93239	10.5075	5.57516	1	0.29777	3.12883	1.66012
00000007_7.tif	3	3	3:3	10.373	20.505	4.93239	11.319	6.38666	1	0.29777	3.37047	1.90176
00000007_7.tif	3	3	3:3	10.63	20.595	4.93239	11.3139	6.3815	1	0.29777	3.36894	1.90022
00000007_7.tif	3	3	3:3	11.248	16.745	4.93239	7.515	2.58261	1	0.29777	2.23774	0.769025
00000007_7.tif	3	3	3:3	10.533	16.564	4.93239	7.68933	2.75694	1	0.29777	2.28965	0.820934
00000007_7.tif	3	3	3:3	10.568	16.675	4.93239	7.76759	2.8352	1	0.29777	2.31296	0.844239
00000007_7.tif	3	3	3:3	19.401	20.043	4.93239	11.2513	6.31892	1	0.29777	3.3503	1.88158
00000007_7.tif	3	3	3:3	19.63	20.085	4.93239	11.3915	6.45906	1	0.29777	3.39203	1.92332
00000007_7.tif	3	3	3:3	21.644	18.203	4.93239	10.9582	6.02581	1	0.29777	3.26302	1.7943
00000007_7.tif	3	3	3:3	19.477	17.259	4.93239	8.8806	3.94821	1	0.29777	2.64438	1.17566
00000007_7.tif	3	3	3:3	20.45	16.127	4.93239	8.62125	3.68886	1	0.29777	2.56715	1.09843
00000007_7.tif	3	3	3:3	21.7	16.488	4.93239	9.77247	4.84008	1	0.29777	2.90995	1.44123
00000007_7.tif	3	3	3:3	21.825	16.405	4.93239	9.81078	4.87839	1	0.29777	2.92136	1.45264
00000007_7.tif	3	3	3:3	20.7	14.915	4.93239	7.99192	3.05954	1	0.29777	2.37975	0.911039
00000007_7.tif	3	3	3:3	21.38	13.776	4.93239	7.92552	2.99313	1	0.29777	2.35998	0.891266
00000007_7.tif	3	3	3:3	23.047	13.658	4.93239	9.37177	4.43938	1	0.29777	2.79063	1.32192
00000007_7.tif	3	3	3:3	23.401	13.047	4.93239	9.48054	4.54815	1	0.29777	2.82302	1.3543
00000007_7.tif	3	3	3:3	23.47	13.304	4.93239	9.6324	4.70001	1	0.29777	2.86824	1.39952
00000007_7.tif	3	3	3:3	23.207	9.634	4.93239	8.76945	3.83706	1	0.29777	2.61128	1.14256
00000007_7.tif	3	3	3:3	23.443	9.516	4.93239	9.01012	4.07774	1	0.29777	2.68294	1.21423
00000007_7.tif	3	3	3:3	22.568	9.307	4.93239	8.14985	3.21747	1	0.29777	2.42678	0.958066
00000007_7.tif	3	3	3:3	16.648	3.29	4.93239	7.00888	2.0765	1	0.29777	2.08703	0.618319
00000007_7.tif	3	3	3:3	16.599	3.415	4.93239	6.87482	1.94243	1	0.29777	2.04711	0.578398
00000007_7.tif	3	3	3:3	17.113	3.998	4.93239	6.51705	1.58466	1	0.29777	1.94058	0.471865
00000007_7.tif	3	3	3:3	17.314	4.116	4.93239	6.49589	1.5635	1	0.29777	1.93428	0.465564
00000007_7.tif	3	3	3:3	17.453	3.936	4.93239	6.71894	1.78655	1	0.29777	2.0007	0.531982
00000007_7.tif	3	3	3:3	17.495	3.852	4.93239	6.81285	1.88047	1	0.29777	2.02866	0.559947
00000007_7.tif	3	3	3:3	15.925	5.405	4.93239	4.77386	-0.158522	0	0.29777	1.42151	-0.0472032
00000007_7.tif	3	3	3:3	16.752	5.613	4.93239	4.90718	-0.0252088	0	0.29777	1.46121	-0.00750643
00000007_7.tif	3	3	3:3	17.252	6.418	4.93239	4.50734	-0.425046	0	0.29777	1.34215	-0.126566
00000007_7.tif	3	3	3:3	17.356	6.606	4.93239	4.42958	-0.50281	0	0.29777	1.31899	-0.149722
00000007_7.tif	3	3	3:3	17.773	6.828	4.93239	4.55984	-0.372547	0	0.29777	1.35778	-0.110933
00000007_7.tif	3	3	3:3	17.71	6.911	4.93239	4.45716	-0.475221	0	0.29777	1.32721	-0.141507
00000007_7.tif	3	3	3:3	17.932	6.939	4.93239	4.60403	-0.32835	0	0.29777	1.37094	-0.0977729
00000007_7.tif	3	3	3:3	20.641	3.724	4.93239	8.78016	3.84777	1	0.29777	2.61447	1.14575
00000007_7.tif	3	3	3:3	20.745	3.905	4.93239	8.72769	3.79531	1	0.29777	2.59885	1.13013
0000007_10.tif	4	2	4:2	6.677	13.123	4.67199	8.39436	3.72237	1	0.29777	2.49959	1.10841
0000007_10.tif	4	2	4:2	6.825	13.247	4.67199	8.25733	3.58534	1	0.29777	2.45878	1.06761
0000007_10.tif	4	2	4:2	7.352	13.503	4.67199	7.76218	3.09019	1	0.29777	2.31134	0.920166
0000007_10.tif	4	2	4:2	7.95	5.16	4.67199	10.1985	5.52646	1	0.29777	3.03679	1.64561
0000007_10.tif	4	2	4:2	11.359	6.229	4.67199	7.26129	2.58931	1	0.29777	2.1622	0.771017
0000007_10.tif	4	2	4:2	11.561	6.188	4.67199	7.19665	2.52467	1	0.29777	2.14295	0.75177
0000007_10.tif	4	2	4:2	7.033	16.931	4.67199	9.16515	4.49316	1	0.29777	2.72911	1.33793
0000007_10.tif	4	2	4:2	7.262	17.076	4.67199	9.0384	4.36641	1	0.29777	2.69136	1.30019
0000007_10.tif	4	2	4:2	7.748	19.014	4.67199	9.79369	5.1217	1	0.29777	2.91627	1.52509
0000007_10.tif	4	2	4:2	10.401	19.333	4.67199	8.27612	3.60413	1	0.29777	2.46438	1.0732
0000007_10.tif	4	2	4:2	11.054	18.84	4.67199	7.50618	2.8342	1	0.29777	2.23512	0.843939
0000007_10.tif	4	2	4:2	10.109	20.726	4.67199	9.60804	4.93605	1	0.29777	2.86099	1.46981
0000007_10.tif	4	2	4:2	16.418	20.045	4.67199	7.68429	3.01231	1	0.29777	2.28815	0.896974
0000007_10.tif	4	2	4:2	13.724	22.288	4.67199	9.89286	5.22088	1	0.29777	2.9458	1.55462
0000007_10.tif	4	2	4:2	13.884	22.309	4.67199	9.89359	5.22161	1	0.29777	2.94602	1.55484
0000007_10.tif	4	2	4:2	12.238	21.427	4.67199	9.37378	4.70179	1	0.29777	2.79123	1.40005
0000007_10.tif	4	2	4:2	13.12	21.476	4.67199	9.19616	4.52417	1	0.29777	2.73834	1.34716
0000007_10.tif	4	2	4:2	12.21	20.302	4.67199	8.31683	3.64484	1	0.29777	2.4765	1.08533
0000007_10.tif	4	2	4:2	12.738	20.094	4.67199	7.95258	3.2806	1	0.29777	2.36804	0.976863
0000007_10.tif	4	2	4:2	13.023	19.844	4.67199	7.63323	2.96124	1	0.29777	2.27295	0.881769
0000007_10.tif	4	2	4:2	13.474	19.865	4.67199	7.54675	2.87477	1	0.29777	2.2472	0.856019
0000007_10.tif	4	2	4:2	13.655	19.844	4.67199	7.49048	2.81849	1	0.29777	2.23044	0.839262
0000007_10.tif	4	2	4:2	13.821	19.781	4.67199	7.39928	2.72729	1	0.29777	2.20328	0.812105
0000007_10.tif	4	2	4:2	16.155	16.34	4.67199	4.01203	-0.659955	0	0.29777	1.19466	-0.196515
0000007_10.tif	4	2	4:2	16.161	16.125	4.67199	3.80761	-0.864379	0	0.29777	1.13379	-0.257386
0000007_10.tif	4	2	4:2	16.328	16.271	4.67199	3.99779	-0.674196	0	0.29777	1.19042	-0.200755
0000007_10.tif	4	2	4:2	16.411	1.882	4.67199	10.6894	6.0174	1	0.29777	3.18298	1.7918
0000007_10.tif	4	2	4:2	15.453	2.09	4.67199	10.4019	5.72994	1	0.29777	3.09738	1.7062
0000007_10.tif	4	2	4:2	14.828	1.951	4.67199	10.5353	5.86329	1	0.29777	3.13709	1.74591
0000007_10.tif	4	2	4:2	14.141	1.854	4.67199	10.6685	5.99655	1	0.29777	3.17677	1.78559
0000007_10.tif	4	2	4:2	13.911	1.944	4.67199	10.601	5.92906	1	0.29777	3.15667	1.76549
0000007_10.tif	4	2	4:2	14.106	2.056	4.67199	10.4704	5.79838	1	0.29777	3.11776	1.72658
0000007_10.tif	4	2	4:2	14.189	2.271	4.67199	10.249	5.57699	1	0.29777	3.05184	1.66066
0000007_10.tif	4	2	4:2	13.932	3.069	4.67199	9.48079	4.80881	1	0.29777	2.8231	1.43192
0000007_10.tif	4	2	4:2	13.432	3.667	4.67199	8.96369	4.2917	1	0.29777	2.66912	1.27794
0000007_10.tif	4	2	4:2	14.168	4.951	4.67199	7.58411	2.91212	1	0.29777	2.25832	0.867143
0000007_10.tif	4	2	4:2	15.724	5.528	4.67199	6.98887	2.31688	1	0.29777	2.08107	0.689897
0000007_10.tif	4	2	4:2	12.905	6.062	4.67199	6.7698	2.09782	1	0.29777	2.01584	0.624667
0000007_10.tif	4	2	4:2	13.023	6.222	4.67199	6.58097	1.90899	1	0.29777	1.95962	0.568439
0000007_10.tif	4	2	4:2	12.738	6.417	4.67199	6.49153	1.81954	1	0.29777	1.93298	0.541805
0000007_10.tif	4	2	4:2	12.571	6.486	4.67199	6.48896	1.81697	1	0.29777	1.93222	0.54104
0000007_10.tif	4	2	4:2	12.439	7.219	4.67199	5.87553	1.20355	1	0.29777	1.74956	0.35838
0000007_10.tif	4	2	4:2	12.981	7.33	4.67199	5.55266	0.880676	1	0.29777	1.65342	0.262239
0000007_10.tif	4	2	4:2	15.05	7.059	4.67199	5.425	0.753014	1	0.29777	1.6154	0.224225
0000007_10.tif	4	2	4:2	17.762	5.997	4.67199	7.03224	2.36025	1	0.29777	2.09399	0.702812
0000007_10.tif	4	2	4:2	20.72	6.413	4.67199	8.30903	3.63704	1	0.29777	2.47418	1.083
0000007_10.tif	4	2	4:2	20.616	6.205	4.67199	8.39283	3.72084	1	0.29777	2.49913	1.10796
0000007_10.tif	4	2	4:2	20.957	20.106	4.67199	9.64484	4.97286	1	0.29777	2.87194	1.48077
0000007_10.tif	4	2	4:2	19.484	20.911	4.67199	9.52372	4.85174	1	0.29777	2.83588	1.4447
0000007_10.tif	4	2	4:2	19.602	20.835	4.67199	9.51248	4.84049	1	0.29777	2.83253	1.44135
0000007_10.tif	4	2	4:2	23.359	16.894	4.67199	9.40943	4.73745	1	0.29777	2.80185	1.41067
0000007_10.tif	4	2	4:2	23.234	16.79	4.67199	9.25033	4.57834	1	0.29777	2.75447	1.36329
00000008_6.tif	2	4	2:4	8.219	3.667	4.86458	10.1498	5.28521	1	0.29777	3.0223	1.57378
00000008_6.tif	2	4	2:4	8.13	3.79	4.86458	10.1286	5.26403	1	0.29777	3.016	1.56747
00000008_6.tif	2	4	2:4	8.686	4.429	4.86458	9.28582	4.42124	1	0.29777	2.76504	1.31651
00000008_6.tif	2	4	2:4	6.707	5.981	4.86458	9.98934	5.12476	1	0.29777	2.97452	1.526
00000008_6.tif	2	4	2:4	9.172	8.092	4.86458	6.8481	1.98352	1	0.29777	2.03916	0.590634
00000008_6.tif	2	4	2:4	9.304	8.064	4.86458	6.73788	1.8733	1	0.29777	2.00634	0.557814
00000008_6.tif	2	4	2:4	8.54	7.259	4.86458	7.77218	2.9076	1	0.29777	2.31432	0.865796
00000008_6.tif	2	4	2:4	8.45	7.411	4.86458	7.78605	2.92148	1	0.29777	2.31845	0.869928
00000008_6.tif	2	4	2:4	5.637	8.575	4.86458	10.0816	5.21705	1	0.29777	3.00201	1.55348
00000008_6.tif	2	4	2:4	6.679	9.102	4.86458	8.95483	4.09025	1	0.29777	2.66648	1.21795
00000008_6.tif	2	4	2:4	6.818	8.97	4.86458	8.84404	3.97946	1	0.29777	2.63349	1.18496
00000008_6.tif	2	4	2:4	9.248	10.693	4.86458	6.23136	1.36678	1	0.29777	1.85551	0.406987
00000008_6.tif	2	4	2:4	9.026	10.714	4.86458	6.45316	1.58859	1	0.29777	1.92156	0.473033
00000008_6.tif	2	4	2:4	8.269	10.554	4.86458	7.21294	2.34837	1	0.29777	2.1478	0.699273
00000008_6.tif	2	4	2:4	7.651	9.54	4.86458	7.9225	3.05792	1	0.29777	2.35908	0.910557
00000008_6.tif	2	4	2:4	7.512	9.79	4.86458	8.02583	3.16126	1	0.29777	2.38985	0.941327
00000008_6.tif	2	4	2:4	6.63	12.005	4.86458	8.93615	4.07158	1	0.29777	2.66092	1.21239
00000008_6.tif	2	4	2:4	14.96	21.089	4.86458	10.342	5.47745	1	0.29777	3.07955	1.63102
00000008_6.tif	2	4	2:4	14.821	21.04	4.86458	10.301	5.43646	1	0.29777	3.06734	1.61881
00000008_6.tif	2	4	2:4	13.731	20.533	4.86458	9.92809	5.06352	1	0.29777	2.95629	1.50776
00000008_6.tif	2	4	2:4	13.648	20.304	4.86458	9.71805	4.85347	1	0.29777	2.89374	1.44522
00000008_6.tif	2	4	2:4	12.481	19.686	4.86458	9.41602	4.55145	1	0.29777	2.80381	1.35528
00000008_6.tif	2	4	2:4	12.773	19.693	4.86458	9.33386	4.46928	1	0.29777	2.77934	1.33082
00000008_6.tif	2	4	2:4	14.981	19.165	4.86458	8.41974	3.55516	1	0.29777	2.50715	1.05862
00000008_6.tif	2	4	2:4	15.724	18.373	4.86458	7.61694	2.75236	1	0.29777	2.2681	0.819571
00000008_6.tif	2	4	2:4	15.377	18.269	4.86458	7.50969	2.64512	1	0.29777	2.23616	0.787636
00000008_6.tif	2	4	2:4	13.655	16.679	4.86458	6.19367	1.32909	1	0.29777	1.84429	0.395764
00000008_6.tif	2	4	2:4	12.821	17.241	4.86458	7.00488	2.1403	1	0.29777	2.08584	0.637318
00000008_6.tif	2	4	2:4	12.113	14.63	4.86458	5.12902	0.264444	1	0.29777	1.52727	0.0787434
00000008_6.tif	2	4	2:4	11.168	12.929	4.86458	4.8259	-0.0386802	0	0.29777	1.43701	-0.0115178
00000008_6.tif	2	4	2:4	11.509	13.339	4.86458	4.73415	-0.130431	0	0.29777	1.40969	-0.0388384
00000008_6.tif	2	4	2:4	11.745	13.651	4.86458	4.72236	-0.142222	0	0.29777	1.40618	-0.0423495
00000008_6.tif	2	4	2:4	11.8	13.45	4.86458	4.55754	-0.307041	0	0.29777	1.3571	-0.0914275
00000008_6.tif	2	4	2:4	11.911	13.526	4.86458	4.51457	-0.350003	0	0.29777	1.3443	-0.10422
00000008_6.tif	2	4	2:4	12.196	13.325	4.86458	4.16621	-0.698366	0	0.29777	1.24057	-0.207953
00000008_6.tif	2	4	2:4	10.168	10.55	4.86458	5.31515	0.450573	1	0.29777	1.58269	0.134167
00000008_6.tif	2	4	2:4	10.293	10.432	4.86458	5.19636	0.331785	1	0.29777	1.54732	0.0987956
00000008_6.tif	2	4	2:4	15.439	7.78	4.86458	2.98027	-1.88431	0	0.29777	0.887435	-0.561091
00000008_6.tif	2	4	2:4	10.641	8.682	4.86458	5.26539	0.400812	1	0.29777	1.56788	0.11935
00000008_6.tif	2	4	2:4	10.391	8.627	4.86458	5.51701	0.652436	1	0.29777	1.6428	0.194276
00000008_6.tif	2	4	2:4	10.078	9.599	4.86458	5.52438	0.659798	1	0.29777	1.64499	0.196468
00000008_6.tif	2	4	2:4	9.807	8.113	4.86458	6.25925	1.39467	1	0.29777	1.86382	0.415291
00000008_6.tif	2	4	2:4	9.828	7.898	4.86458	6.33442	1.46984	1	0.29777	1.8862	0.437674
00000008_6.tif	2	4	2:4	10.273	3.075	4.86458	9.28233	4.41775	1	0.29777	2.764	1.31547
00000008_6.tif	2	4	2:4	10.898	2.075	4.86458	9.8191	4.95453	1	0.29777	2.92383	1.47531
00000008_6.tif	2	4	2:4	11.085	2.123	4.86458	9.69046	4.82588	1	0.29777	2.88553	1.437
00000008_6.tif	2	4	2:4	12.245	2.241	4.86458	9.1122	4.24762	1	0.29777	2.71334	1.26481
00000008_6.tif	2	4	2:4	12.398	2.276	4.86458	9.02612	4.16154	1	0.29777	2.68771	1.23918
00000008_6.tif	2	4	2:4	12.502	3.214	4.86458	8.11201	3.24743	1	0.29777	2.41551	0.966987
00000008_6.tif	2	4	2:4	13.168	3.359	4.86458	7.75342	2.88884	1	0.29777	2.30874	0.860211
00000008_6.tif	2	4	2:4	13.807	2.811	4.86458	8.12294	3.25836	1	0.29777	2.41877	0.970243
00000008_6.tif	2	4	2:4	14.009	3.095	4.86458	7.80469	2.94011	1	0.29777	2.324	0.875476
00000008_6.tif	2	4	2:4	14.502	4.602	4.86458	6.23502	1.37044	1	0.29777	1.8566	0.408077
00000008_6.tif	2	4	2:4	12.71	3.818	4.86458	7.47387	2.60929	1	0.29777	2.22549	0.776969
00000008_6.tif	2	4	2:4	11.939	4.207	4.86458	7.44805	2.58347	1	0.29777	2.21781	0.76928
00000008_6.tif	2	4	2:4	15.349	2.328	4.86458	8.433	3.56842	1	0.29777	2.5111	1.06257
00000008_6.tif	2	4	2:4	15.349	2.467	4.86458	8.29402	3.42944	1	0.29777	2.46971	1.02118
00000008_6.tif	2	4	2:4	15.189	3.155	4.86458	7.61053	2.74595	1	0.29777	2.26619	0.817662
00000008_6.tif	2	4	2:4	15.307	3.328	4.86458	7.43399	2.56941	1	0.29777	2.21362	0.765094
00000008_6.tif	2	4	2:4	15.585	3.668	4.86458	7.09279	2.22821	1	0.29777	2.11202	0.663496
00000008_6.tif	2	4	2:4	15.293	3.842	4.86458	6.9205	2.05592	1	0.29777	2.06072	0.612192
00000008_6.tif	2	4	2:4	18.349	2.988	4.86458	8.28498	3.4204	1	0.29777	2.46702	1.01849
00000008_6.tif	2	4	2:4	18.509	3.37	4.86458	7.98705	3.12247	1	0.29777	2.3783	0.929779
00000008_6.tif	2	4	2:4	17.856	4.106	4.86458	7.06582	2.20125	1	0.29777	2.10399	0.655465
00000008_6.tif	2	4	2:4	17.655	4.161	4.86458	6.94851	2.08393	1	0.29777	2.06906	0.620532
00000008_6.tif	2	4	2:4	15.405	4.78	4.86458	5.98046	1.11588	1	0.29777	1.7808	0.332276
00000008_6.tif	2	4	2:4	15.509	4.932	4.86458	5.82808	0.9635	1	0.29777	1.73543	0.286901
00000008_6.tif	2	4	2:4	15.578	4.884	4.86458	5.87683	1.01226	1	0.29777	1.74994	0.30142
00000008_6.tif	2	4	2:4	16.273	5.057	4.86458	5.75801	0.89343	1	0.29777	1.71456	0.266037
00000008_6.tif	2	4	2:4	16.307	4.863	4.86458	5.95485	1.09027	1	0.29777	1.77317	0.324649
00000008_6.tif	2	4	2:4	16.141	4.849	4.86458	5.94795	1.08338	1	0.29777	1.77112	0.322597
00000008_6.tif	2	4	2:4	16.814	4.495	4.86458	6.40566	1.54108	1	0.29777	1.90741	0.458888
00000008_6.tif	2	4	2:4	16.918	4.398	4.86458	6.52271	1.65813	1	0.29777	1.94227	0.493743
00000008_6.tif	2	4	2:4	17.141	4.363	4.86458	6.60938	1.7448	1	0.29777	1.96807	0.519549
00000008_6.tif	2	4	2:4	17.196	4.363	4.86458	6.62342	1.75884	1	0.29777	1.97226	0.523731
00000008_6.tif	2	4	2:4	17.071	4.502	4.86458	6.45732	1.59275	1	0.29777	1.9228	0.474272
00000008_6.tif	2	4	2:4	16.946	4.543	4.86458	6.38774	1.52316	1	0.29777	1.90208	0.453551
00000008_6.tif	2	4	2:4	19.21	4.707	4.86458	7.1105	2.24592	1	0.29777	2.11729	0.668768
00000008_6.tif	2	4	2:4	19.016	4.866	4.86458	6.87383	2.00926	1	0.29777	2.04682	0.598297
00000008_6.tif	2	4	2:4	19.141	4.873	4.86458	6.93304	2.06846	1	0.29777	2.06445	0.615925
00000008_6.tif	2	4	2:4	19.224	5.089	4.86458	6.79597	1.9314	1	0.29777	2.02364	0.575112
00000008_6.tif	2	4	2:4	19.321	5.859	4.86458	6.22742	1.36284	1	0.29777	1.85434	0.405814
00000008_6.tif	2	4	2:4	18.502	4.873	4.86458	6.6178	1.75322	1	0.29777	1.97058	0.522058
00000008_6.tif	2	4	2:4	18.21	5.366	4.86458	6.04596	1.18138	1	0.29777	1.8003	0.351779
00000008_6.tif	2	4	2:4	18.391	5.443	4.86458	6.0622	1.19762	1	0.29777	1.80514	0.356615
00000008_6.tif	2	4	2:4	17.363	5.533	4.86458	5.55617	0.691589	1	0.29777	1.65446	0.205934
00000008_6.tif	2	4	2:4	15.307	6.307	4.86458	4.45632	-0.408257	0	0.29777	1.32696	-0.121567
00000008_6.tif	2	4	2:4	15.398	6.481	4.86458	4.27977	-0.584811	0	0.29777	1.27439	-0.174139
00000008_6.tif	2	4	2:4	18.002	7.092	4.86458	4.45194	-0.412639	0	0.29777	1.32565	-0.122872
00000008_6.tif	2	4	2:4	18.071	7.21	4.86458	4.39556	-0.469015	0	0.29777	1.30887	-0.139659
00000008_6.tif	2	4	2:4	18.557	8.148	4.86458	4.03691	-0.827669	0	0.29777	1.20207	-0.246455
00000008_6.tif	2	4	2:4	19.155	8.321	4.86458	4.41154	-0.453036	0	0.29777	1.31362	-0.134901
00000008_6.tif	2	4	2:4	17.28	8.936	4.86458	2.56331	-2.30126	0	0.29777	0.763278	-0.685247
00000008_6.tif	2	4	2:4	16.321	8.811	4.86458	2.1231	-2.74147	0	0.29777	0.632196	-0.816329
00000008_6.tif	2	4	2:4	20.092	12.672	4.86458	4.99355	0.12897	1	0.29777	1.48693	0.0384034
00000008_6.tif	2	4	2:4	19.543	18.859	4.86458	9.06145	4.19687	1	0.29777	2.69823	1.2497
00000008_6.tif	2	4	2:4	19.634	16.464	4.86458	7.05689	2.19231	1	0.29777	2.10133	0.652804
00000008_6.tif	2	4	2:4	19.78	16.637	4.86458	7.2827	2.41812	1	0.29777	2.16857	0.720045
00000008_6.tif	2	4	2:4	16.807	18.019	4.86458	7.37948	2.5149	1	0.29777	2.19739	0.748861
00000008_6.tif	2	4	2:4	16.925	18.193	4.86458	7.57234	2.70777	1	0.29777	2.25482	0.806292
00000008_6.tif	2	4	2:4	21.995	18.234	4.86458	9.91559	5.05101	1	0.29777	2.95257	1.50404
00000008_6.tif	2	4	2:4	22.005	18.016	4.86458	9.75901	4.89443	1	0.29777	2.90594	1.45741
00000008_6.tif	2	4	2:4	21.061	13.866	4.86458	6.38795	1.52338	1	0.29777	1.90214	0.453616
00000008_6.tif	2	4	2:4	20.998	14.158	4.86458	6.48119	1.61661	1	0.29777	1.9299	0.481377
00000008_6.tif	2	4	2:4	22.561	15.227	4.86458	8.3731	3.50852	1	0.29777	2.49326	1.04473
00000008_6.tif	2	4	2:4	23.144	15.561	4.86458	9.04444	4.17986	1	0.29777	2.69316	1.24464
00000008_6.tif	2	4	2:4	23.144	15.561	4.86458	9.04444	4.17986	1	0.29777	2.69316	1.24464
00000008_6.tif	2	4	2:4	23.057	15.786	4.86458	9.09323	4.22865	1	0.29777	2.70769	1.25916
00000008_6.tif	2	4	2:4	23.219	15.719	4.86458	9.19235	4.32777	1	0.29777	2.73721	1.28868
00000008_6.tif	2	4	2:4	22.589	16.208	4.86458	8.95728	4.0927	1	0.29777	2.66721	1.21868
00000008_6.tif	2	4	2:4	22.755	16.094	4.86458	9.02174	4.15716	1	0.29777	2.6864	1.23788
00000008_6.tif	2	4	2:4	22.484	16.227	4.86458	8.88584	4.02126	1	0.29777	2.64594	1.19741
00000008_6.tif	2	4	2:4	23.748	16.595	4.86458	10.1205	5.25588	1	0.29777	3.01357	1.56504
00000008_6.tif	2	4	2:4	23.88	16.51	4.86458	10.1803	5.31576	1	0.29777	3.0314	1.58287
00000008_6.tif	2	4	2:4	24.646	13.729	4.86458	9.63581	4.77123	1	0.29777	2.86926	1.42073
00000008_6.tif	2	4	2:4	24.599	13.568	4.86458	9.5425	4.67792	1	0.29777	2.84147	1.39294
00000008_6.tif	2	4	2:4	21.438	12.141	4.86458	6.11693	1.25235	1	0.29777	1.82144	0.372913
00000008_6.tif	2	4	2:4	21.661	11.979	4.86458	6.30104	1.43646	1	0.29777	1.87626	0.427735
00000008_6.tif	2	4	2:4	22.062	11.771	4.86458	6.66018	1.7956	1	0.29777	1.9832	0.534677
00000008_6.tif	2	4	2:4	22.135	11.286	4.86458	6.67675	1.81217	1	0.29777	1.98814	0.539611
00000008_6.tif	2	4	2:4	20.958	9.839	4.86458	5.55587	0.691292	1	0.29777	1.65437	0.205846
00000008_6.tif	2	4	2:4	21.354	10.385	4.86458	5.88696	1.02238	1	0.29777	1.75296	0.304434
00000008_6.tif	2	4	2:4	22.214	11.094	4.86458	6.74328	1.8787	1	0.29777	2.00795	0.55942
00000008_6.tif	2	4	2:4	21.417	3.656	4.86458	9.25887	4.39429	1	0.29777	2.75701	1.30849
00000008_6.tif	2	4	2:4	21.865	3.927	4.86458	9.35259	4.48801	1	0.29777	2.78492	1.33639
00000008_6.tif	2	4	2:4	22.172	6.63	4.86458	7.86468	3.0001	1	0.29777	2.34186	0.89334
00000008_6.tif	2	4	2:4	22.406	6.25	4.86458	8.2658	3.40122	1	0.29777	2.46131	1.01278
00000008_6.tif	2	4	2:4	20.656	5.776	4.86458	7.18621	2.32163	1	0.29777	2.13984	0.691312
00000008_6.tif	2	4	2:4	20.911	5.589	4.86458	7.49972	2.63515	1	0.29777	2.23319	0.784668
00000008_6.tif	2	4	2:4	20.688	5.453	4.86458	7.43626	2.57168	1	0.29777	2.21429	0.765769
00000008_6.tif	2	4	2:4	20.547	5.547	4.86458	7.27049	2.40591	1	0.29777	2.16493	0.716408
00000008_6.tif	2	4	2:4	20.193	5.38	4.86458	7.15306	2.28848	1	0.29777	2.12997	0.68144
00000008_6.tif	2	4	2:4	20.193	5.484	4.86458	7.07517	2.21059	1	0.29777	2.10677	0.658247
00000009_5.tif	2	4	2:4	7.365	3.896	4.56255	8.72893	4.16638	1	0.29777	2.59921	1.24062
00000009_5.tif	2	4	2:4	6.981	4.068	4.56255	8.89368	4.33113	1	0.29777	2.64827	1.28968
00000009_5.tif	2	4	2:4	6.585	5.422	4.56255	8.38914	3.8266	1	0.29777	2.49803	1.13945
00000009_5.tif	2	4	2:4	6.759	5.512	4.56255	8.19416	3.63161	1	0.29777	2.43997	1.08138
00000009_5.tif	2	4	2:4	6.925	5.623	4.56255	7.99449	3.43194	1	0.29777	2.38052	1.02193
00000009_5.tif	2	4	2:4	7.634	5.741	4.56255	7.34084	2.7783	1	0.29777	2.18588	0.827294
00000009_5.tif	2	4	2:4	7.842	5.859	4.56255	7.10288	2.54034	1	0.29777	2.11503	0.756436
00000009_5.tif	2	4	2:4	7.752	6.012	4.56255	7.08996	2.52741	1	0.29777	2.11118	0.752588
00000009_5.tif	2	4	2:4	8.55	8.036	4.56255	5.44001	0.877464	1	0.29777	1.61987	0.261282
00000009_5.tif	2	4	2:4	8.717	7.856	4.56255	5.35271	0.790163	1	0.29777	1.59388	0.235287
00000009_5.tif	2	4	2:4	7.3	7.391	4.56255	6.83947	2.27692	1	0.29777	2.03659	0.677999
00000009_5.tif	2	4	2:4	7.474	7.182	4.56255	6.76205	2.1995	1	0.29777	2.01353	0.654946
00000009_5.tif	2	4	2:4	6.155	7.092	4.56255	8.01421	3.45166	1	0.29777	2.38639	1.0278
00000009_5.tif	2	4	2:4	6.155	7.092	4.56255	8.01421	3.45166	1	0.29777	2.38639	1.0278
00000009_5.tif	2	4	2:4	6.064	6.78	4.56255	8.21522	3.65267	1	0.29777	2.44624	1.08766
00000009_5.tif	2	4	2:4	4.3	7.516	4.56255	9.65191	5.08937	1	0.29777	2.87405	1.51546
00000009_5.tif	2	4	2:4	4.446	7.585	4.56255	9.49322	4.93067	1	0.29777	2.8268	1.46821
00000009_5.tif	2	4	2:4	4.481	7.418	4.56255	9.50281	4.94026	1	0.29777	2.82965	1.47106
00000009_5.tif	2	4	2:4	4.974	8.148	4.56255	8.85037	4.28782	1	0.29777	2.63537	1.27678
00000009_5.tif	2	4	2:4	5.05	7.995	4.56255	8.80902	4.24648	1	0.29777	2.62306	1.26447
00000009_5.tif	2	4	2:4	5.37	8.238	4.56255	8.44432	3.88178	1	0.29777	2.51447	1.15588
00000009_5.tif	2	4	2:4	6.071	7.807	4.56255	7.86691	3.30437	1	0.29777	2.34253	0.983942
00000009_5.tif	2	4	2:4	5.995	7.939	4.56255	7.90509	3.34255	1	0.29777	2.3539	0.99531
00000009_5.tif	2	4	2:4	7.009	8.481	4.56255	6.79102	2.22848	1	0.29777	2.02216	0.663574
00000009_5.tif	2	4	2:4	7.481	8.384	4.56255	6.35484	1.79229	1	0.29777	1.89228	0.53369
00000009_5.tif	2	4	2:4	7.356	8.418	4.56255	6.46772	1.90518	1	0.29777	1.92589	0.567304
00000009_5.tif	2	4	2:4	4.418	11.564	4.56255	9.35399	4.79144	1	0.29777	2.78534	1.42675
00000009_5.tif	2	4	2:4	4.155	11.043	4.56255	9.54064	4.9781	1	0.29777	2.84092	1.48233
00000009_5.tif	2	4	2:4	4.543	10.675	4.56255	9.11937	4.55682	1	0.29777	2.71547	1.35689
00000009_5.tif	2	4	2:4	4.398	10.793	4.56255	9.27368	4.71113	1	0.29777	2.76142	1.40283
00000009_5.tif	2	4	2:4	4.481	10.856	4.56255	9.19687	4.63433	1	0.29777	2.73855	1.37996
00000009_5.tif	2	4	2:4	5.245	10.974	4.56255	8.44998	3.88743	1	0.29777	2.51615	1.15756
00000009_5.tif	2	4	2:4	5.12	10.78	4.56255	8.55353	3.99099	1	0.29777	2.54699	1.1884
00000009_5.tif	2	4	2:4	5.37	10.773	4.56255	8.30401	3.74147	1	0.29777	2.47269	1.1141
00000009_5.tif	2	4	2:4	5.988	11.293	4.56255	7.76077	3.19823	1	0.29777	2.31093	0.952336
00000009_5.tif	2	4	2:4	6.12	11.127	4.56255	7.6037	3.04115	1	0.29777	2.26415	0.905563
00000009_5.tif	2	4	2:4	6.682	10.036	4.56255	6.95332	2.39078	1	0.29777	2.07049	0.711901
00000009_5.tif	2	4	2:4	6.974	10.467	4.56255	6.67959	2.11704	1	0.29777	1.98898	0.630392
00000009_5.tif	2	4	2:4	7.106	10.675	4.56255	6.56706	2.00451	1	0.29777	1.95547	0.596884
00000009_5.tif	2	4	2:4	7.273	10.627	4.56255	6.39594	1.83339	1	0.29777	1.90452	0.545929
00000009_5.tif	2	4	2:4	7.773	11.113	4.56255	5.97259	1.41004	1	0.29777	1.77846	0.419867
00000009_5.tif	2	4	2:4	7.974	11.648	4.56255	5.90474	1.34219	1	0.29777	1.75825	0.399665
00000009_5.tif	2	4	2:4	8.141	11.731	4.56255	5.76963	1.20709	1	0.29777	1.71802	0.359435
00000009_5.tif	2	4	2:4	8.349	11.62	4.56255	5.53783	0.975287	1	0.29777	1.649	0.290411
00000009_5.tif	2	4	2:4	7.092	12.543	4.56255	7.0311	2.46855	1	0.29777	2.09365	0.73506
00000009_5.tif	2	4	2:4	7.273	12.571	4.56255	6.87353	2.31099	1	0.29777	2.04673	0.688142
00000009_5.tif	2	4	2:4	7.752	13.71	4.56255	6.97171	2.40917	1	0.29777	2.07597	0.717377
00000009_5.tif	2	4	2:4	7.349	14.536	4.56255	7.7699	3.20735	1	0.29777	2.31364	0.955053
00000009_5.tif	2	4	2:4	5.53	13.557	4.56255	8.86368	4.30113	1	0.29777	2.63934	1.28075
00000009_5.tif	2	4	2:4	5.363	13.432	4.56255	8.96763	4.40508	1	0.29777	2.67029	1.3117
00000009_5.tif	2	4	2:4	7.891	17.547	4.56255	9.50892	4.94638	1	0.29777	2.83147	1.47288
00000009_5.tif	2	4	2:4	7.127	17.734	4.56255	10.1316	5.56905	1	0.29777	3.01689	1.6583
00000009_5.tif	2	4	2:4	7.078	17.561	4.56255	10.0316	5.46904	1	0.29777	2.98711	1.62852
00000009_5.tif	2	4	2:4	12.575	21.401	4.56255	11.481	6.91849	1	0.29777	3.41871	2.06012
00000009_5.tif	2	4	2:4	12.679	21.276	4.56255	11.3473	6.7848	1	0.29777	3.3789	2.02031
00000009_5.tif	2	4	2:4	10.679	19.762	4.56255	10.2294	5.66686	1	0.29777	3.04601	1.68742
00000009_5.tif	2	4	2:4	10.554	19.568	4.56255	10.0813	5.51879	1	0.29777	3.00192	1.64333
00000009_5.tif	2	4	2:4	12.623	17.637	4.56255	7.73449	3.17195	1	0.29777	2.3031	0.94451
00000009_5.tif	2	4	2:4	12.707	17.401	4.56255	7.48971	2.92717	1	0.29777	2.23021	0.871623
00000009_5.tif	2	4	2:4	13.366	15.717	4.56255	5.75429	1.19174	1	0.29777	1.71346	0.354866
00000009_5.tif	2	4	2:4	13.227	15.543	4.56255	5.58891	1.02637	1	0.29777	1.66421	0.305621
00000009_5.tif	2	4	2:4	9.922	15.12	4.56255	6.34974	1.78719	1	0.29777	1.89076	0.532172
00000009_5.tif	2	4	2:4	14.644	8.72	4.56255	1.60564	-2.95691	0	0.29777	0.478112	-0.880478
00000009_5.tif	2	4	2:4	14.672	8.491	4.56255	1.80551	-2.75704	0	0.29777	0.537626	-0.820964
00000009_5.tif	2	4	2:4	13.547	7.811	4.56255	2.15979	-2.40275	0	0.29777	0.643122	-0.715468
00000009_5.tif	2	4	2:4	13.325	7.505	4.56255	2.48342	-2.07912	0	0.29777	0.739489	-0.6191
00000009_5.tif	2	4	2:4	11.214	9.095	4.56255	2.57393	-1.98862	0	0.29777	0.766439	-0.59215
00000009_5.tif	2	4	2:4	9.769	7.561	4.56255	4.5546	-0.00794217	0	0.29777	1.35622	-0.00236494
00000009_5.tif	2	4	2:4	9.832	7.116	4.56255	4.7542	0.191654	1	0.29777	1.41566	0.0570687
00000009_5.tif	2	4	2:4	10.193	6.852	4.56255	4.6436	0.081057	1	0.29777	1.38273	0.0241363
00000009_5.tif	2	4	2:4	10.304	6.977	4.56255	4.47746	-0.085089	0	0.29777	1.33325	-0.025337
00000009_5.tif	2	4	2:4	14.852	3.866	4.56255	6.22316	1.66061	1	0.29777	1.85307	0.49448
00000009_5.tif	2	4	2:4	12.776	3.554	4.56255	6.47226	1.90971	1	0.29777	1.92724	0.568654
00000009_5.tif	2	4	2:4	12.373	2.512	4.56255	7.56303	3.00049	1	0.29777	2.25204	0.893455
00000009_5.tif	2	4	2:4	12.38	2.318	4.56255	7.75325	3.1907	1	0.29777	2.30868	0.950095
00000009_5.tif	2	4	2:4	9.908	4.922	4.56255	6.27397	1.71143	1	0.29777	1.8682	0.509612
00000009_5.tif	2	4	2:4	9.727	4.825	4.56255	6.46012	1.89758	1	0.29777	1.92363	0.565042
00000009_5.tif	2	4	2:4	9.623	4.762	4.56255	6.57335	2.01081	1	0.29777	1.95735	0.598758
00000009_5.tif	2	4	2:4	12.29	4.811	4.56255	5.33048	0.767931	1	0.29777	1.58726	0.228667
00000009_5.tif	2	4	2:4	12.623	4.54	4.56255	5.52252	0.95997	1	0.29777	1.64444	0.28585
00000009_5.tif	2	4	2:4	12.651	4.97	4.56255	5.09492	0.532378	1	0.29777	1.51712	0.158526
00000009_5.tif	2	4	2:4	13.415	5.102	4.56255	4.87197	0.309423	1	0.29777	1.45073	0.092137
00000009_5.tif	2	4	2:4	12.977	5.561	4.56255	4.45684	-0.105706	0	0.29777	1.32711	-0.031476
00000009_5.tif	2	4	2:4	13.116	5.519	4.56255	4.48016	-0.0823834	0	0.29777	1.33406	-0.0245313
00000009_5.tif	2	4	2:4	13.29	5.561	4.56255	4.42148	-0.141066	0	0.29777	1.31658	-0.0420052
00000009_5.tif	2	4	2:4	13.359	5.852	4.56255	4.12624	-0.436305	0	0.29777	1.22867	-0.129919
00000009_5.tif	2	4	2:4	13.665	5.852	4.56255	4.11711	-0.445437	0	0.29777	1.22595	-0.132638
00000009_5.tif	2	4	2:4	16.818	2.752	4.56255	7.88775	3.3252	1	0.29777	2.34873	0.990145
00000009_5.tif	2	4	2:4	17.359	2.273	4.56255	8.54965	3.98711	1	0.29777	2.54583	1.18724
00000009_5.tif	2	4	2:4	15.373	2.557	4.56255	7.61304	3.05049	1	0.29777	2.26694	0.908346
00000009_5.tif	2	4	2:4	15.582	2.641	4.56255	7.58224	3.0197	1	0.29777	2.25776	0.899175
00000009_5.tif	2	4	2:4	15.95	3.043	4.56255	7.30265	2.7401	1	0.29777	2.17451	0.815921
00000009_5.tif	2	4	2:4	16.137	3.099	4.56255	7.31142	2.74888	1	0.29777	2.17712	0.818533
00000009_5.tif	2	4	2:4	16.804	1.759	4.56255	8.80038	4.23783	1	0.29777	2.62049	1.2619
00000009_5.tif	2	4	2:4	16.568	1.724	4.56255	8.75114	4.1886	1	0.29777	2.60583	1.24724
00000009_5.tif	2	4	2:4	18.269	2.981	4.56255	8.38487	3.82233	1	0.29777	2.49676	1.13817
00000009_5.tif	2	4	2:4	18.297	3.238	4.56255	8.18783	3.62529	1	0.29777	2.43809	1.0795
00000009_5.tif	2	4	2:4	18.443	3.224	4.56255	8.28323	3.72068	1	0.29777	2.4665	1.10791
00000009_5.tif	2	4	2:4	18.623	3.28	4.56255	8.34403	3.78149	1	0.29777	2.4846	1.12601
00000009_5.tif	2	4	2:4	20.214	4.418	4.56255	8.60795	4.04541	1	0.29777	2.56319	1.2046
00000009_5.tif	2	4	2:4	20.186	4.63	4.56255	8.45107	3.88852	1	0.29777	2.51647	1.15788
00000009_5.tif	2	4	2:4	19.977	5.377	4.56255	7.82991	3.26736	1	0.29777	2.33151	0.972922
00000009_5.tif	2	4	2:4	19.943	5.842	4.56255	7.5381	2.97556	1	0.29777	2.24462	0.886031
00000009_5.tif	2	4	2:4	19.929	5.957	4.56255	7.46395	2.90141	1	0.29777	2.22254	0.863952
00000009_5.tif	2	4	2:4	20.082	6.693	4.56255	7.2316	2.66905	1	0.29777	2.15335	0.794763
00000009_5.tif	2	4	2:4	15.387	8.109	4.56255	2.55521	-2.00734	0	0.29777	0.760865	-0.597724
00000009_5.tif	2	4	2:4	16.589	8.97	4.56255	3.11835	-1.44419	0	0.29777	0.928552	-0.430038
00000009_5.tif	2	4	2:4	16.776	9.109	4.56255	3.25661	-1.30594	0	0.29777	0.969719	-0.38887
00000009_5.tif	2	4	2:4	19.54	13.644	4.56255	6.95519	2.39264	1	0.29777	2.07105	0.712457
00000009_5.tif	2	4	2:4	19.741	13.797	4.56255	7.20672	2.64417	1	0.29777	2.14595	0.787356
00000009_5.tif	2	4	2:4	15.595	16.686	4.56255	6.99712	2.43457	1	0.29777	2.08353	0.724943
00000009_5.tif	2	4	2:4	15.366	16.818	4.56255	7.06436	2.50181	1	0.29777	2.10355	0.744965
00000009_5.tif	2	4	2:4	23.106	6.186	4.56255	10.1986	5.63603	1	0.29777	3.03683	1.67824
00000009_5.tif	2	4	2:4	23.106	6.186	4.56255	10.1986	5.63603	1	0.29777	3.03683	1.67824
00000009_5.tif	2	4	2:4	23.488	8.658	4.56255	9.93984	5.37729	1	0.29777	2.95978	1.6012
00000009_5.tif	2	4	2:4	23.453	8.832	4.56255	9.88362	5.32107	1	0.29777	2.94304	1.58446
00000009_5.tif	2	4	2:4	22.474	9.47	4.56255	8.85307	4.29053	1	0.29777	2.63618	1.27759
00000009_5.tif	2	4	2:4	22.481	9.686	4.56255	8.85053	4.28798	1	0.29777	2.63542	1.27683
00000009_5.tif	2	4	2:4	23.849	13.55	4.56255	10.8236	6.26101	1	0.29777	3.22293	1.86434
00000009_5.tif	2	4	2:4	23.696	15.113	4.56255	11.2998	6.73721	1	0.29777	3.36473	2.00614
00000009_5.tif	2	4	2:4	23.071	15.682	4.56255	11.0307	6.46816	1	0.29777	3.28461	1.92602
00000009_5.tif	2	4	2:4	22.849	15.641	4.56255	10.8199	6.25731	1	0.29777	3.22183	1.86324
00000001_1.tif	0	6	0:6	6.812	5.156	3.58875	9.2302	5.64145	1	0.29777	2.74848	1.67986
00000001_1.tif	0	6	0:6	5.918	5.901	3.58875	9.48557	5.89682	1	0.29777	2.82452	1.7559
00000001_1.tif	0	6	0:6	8.071	5.908	3.58875	7.79106	4.20231	1	0.29777	2.31994	1.25132
00000001_1.tif	0	6	0:6	8.148	5.783	3.58875	7.82113	4.23238	1	0.29777	2.3289	1.26028
00000001_1.tif	0	6	0:6	7.092	9.939	3.58875	6.80452	3.21577	1	0.29777	2.02618	0.957559
00000001_1.tif	0	6	0:6	7.238	9.96	3.58875	6.65717	3.06842	1	0.29777	1.98231	0.913684
00000001_1.tif	0	6	0:6	7.432	9.474	3.58875	6.57829	2.98954	1	0.29777	1.95882	0.890196
00000001_1.tif	0	6	0:6	8.405	14.894	3.58875	6.51076	2.92201	1	0.29777	1.93871	0.870088
00000001_1.tif	0	6	0:6	8.321	14.797	3.58875	6.52648	2.93773	1	0.29777	1.94339	0.874767
00000001_1.tif	0	6	0:6	5.536	16.47	3.58875	9.77359	6.18484	1	0.29777	2.91028	1.84166
00000001_1.tif	0	6	0:6	5.55	16.297	3.58875	9.66974	6.08099	1	0.29777	2.87936	1.81074
00000001_1.tif	0	6	0:6	12.273	17.071	3.58875	6.04677	2.45802	1	0.29777	1.80055	0.731925
00000001_1.tif	0	6	0:6	12.21	16.946	3.58875	5.94207	2.35332	1	0.29777	1.76937	0.700747
00000001_1.tif	0	6	0:6	13.196	15.585	3.58875	4.40931	0.820562	1	0.29777	1.31296	0.244339
00000001_1.tif	0	6	0:6	10.307	14.578	3.58875	4.83223	1.24348	1	0.29777	1.43889	0.370271
00000001_1.tif	0	6	0:6	10.717	14.307	3.58875	4.35019	0.761436	1	0.29777	1.29536	0.226733
00000001_1.tif	0	6	0:6	10.523	14.217	3.58875	4.42719	0.838439	1	0.29777	1.31828	0.249662
00000001_1.tif	0	6	0:6	13.224	14.766	3.58875	3.59464	0.00588465	1	0.29777	1.07037	0.00175227
00000001_1.tif	0	6	0:6	13.286	14.745	3.58875	3.56484	-0.0239146	0	0.29777	1.0615	-0.00712105
00000001_1.tif	0	6	0:6	12.946	14.391	3.58875	3.28363	-0.305121	0	0.29777	0.977767	-0.0908558
00000001_1.tif	0	6	0:6	12.981	14.314	3.58875	3.20032	-0.388435	0	0.29777	0.952958	-0.115664
00000001_1.tif	0	6	0:6	13.071	14.314	3.58875	3.17915	-0.409597	0	0.29777	0.946657	-0.121966
00000001_1.tif	0	6	0:6	12.835	14.224	3.58875	3.15366	-0.43509	0	0.29777	0.939066	-0.129557
00000001_1.tif	0	6	0:6	13.016	14.057	3.58875	2.94283	-0.645921	0	0.29777	0.876287	-0.192336
00000001_1.tif	0	6	0:6	12.057	13.745	3.58875	3.05956	-0.529189	0	0.29777	0.911046	-0.157577
00000001_1.tif	0	6	0:6	12.161	13.53	3.58875	2.82349	-0.765264	0	0.29777	0.84075	-0.227873
00000001_1.tif	0	6	0:6	12.293	13.46	3.58875	2.69143	-0.89732	0	0.29777	0.801428	-0.267195
00000001_1.tif	0	6	0:6	11.863	13.182	3.58875	2.74456	-0.844194	0	0.29777	0.817247	-0.251376
00000001_1.tif	0	6	0:6	11.62	12.953	3.58875	2.76992	-0.818831	0	0.29777	0.824799	-0.243823
00000001_1.tif	0	6	0:6	11.939	12.967	3.58875	2.53921	-1.04954	0	0.29777	0.7561	-0.312522
00000001_1.tif	0	6	0:6	11.939	12.863	3.58875	2.46856	-1.1202	0	0.29777	0.735062	-0.33356
00000001_1.tif	0	6	0:6	10.96	12.658	3.58875	3.16465	-0.424104	0	0.29777	0.942337	-0.126285
00000001_1.tif	0	6	0:6	11.231	12.7	3.58875	2.94707	-0.641681	0	0.29777	0.877549	-0.191073
00000001_1.tif	0	6	0:6	11.773	12.672	3.58875	2.47745	-1.1113	0	0.29777	0.737711	-0.330911
00000001_1.tif	0	6	0:6	11.703	12.547	3.58875	2.46459	-1.12416	0	0.29777	0.733882	-0.334741
00000001_1.tif	0	6	0:6	12.094	12.401	3.58875	2.05866	-1.53009	0	0.29777	0.613008	-0.455614
00000001_1.tif	0	6	0:6	11.917	11.99	3.58875	2.01446	-1.57429	0	0.29777	0.599846	-0.468776
00000001_1.tif	0	6	0:6	13.354	13.667	3.58875	2.48903	-1.09972	0	0.29777	0.74116	-0.327463
00000001_1.tif	0	6	0:6	13.292	13.583	3.58875	2.41794	-1.17081	0	0.29777	0.719989	-0.348634
00000001_1.tif	0	6	0:6	13.198	13.49	3.58875	2.34825	-1.24051	0	0.29777	0.699237	-0.369385
00000001_1.tif	0	6	0:6	13.969	13.557	3.58875	2.35094	-1.23782	0	0.29777	0.700038	-0.368584
00000001_1.tif	0	6	0:6	13.865	13.484	3.58875	2.27174	-1.31701	0	0.29777	0.676457	-0.392165
00000001_1.tif	0	6	0:6	13.906	13.208	3.58875	1.99823	-1.59052	0	0.29777	0.595014	-0.473609
00000001_1.tif	0	6	0:6	13.359	14.281	3.58875	3.09522	-0.493533	0	0.29777	0.921663	-0.146959
00000001_1.tif	0	6	0:6	13.328	14.198	3.58875	3.01744	-0.571309	0	0.29777	0.898504	-0.170119
00000001_1.tif	0	6	0:6	13.755	15.688	3.58875	4.47405	0.885298	1	0.29777	1.33224	0.263615
00000001_1.tif	0	6	0:6	13.682	15.531	3.58875	4.31802	0.729272	1	0.29777	1.28578	0.217155
00000001_1.tif	0	6	0:6	13.823	15.953	3.58875	4.73923	1.15048	1	0.29777	1.4112	0.342579
00000001_1.tif	0	6	0:6	13.724	12.604	3.58875	1.39097	-2.19778	0	0.29777	0.41419	-0.654433
00000001_1.tif	0	6	0:6	13.75	12.411	3.58875	1.19728	-2.39147	0	0.29777	0.356515	-0.712108
00000001_1.tif	0	6	0:6	13.823	12.359	3.58875	1.14596	-2.44279	0	0.29777	0.341234	-0.727389
00000001_1.tif	0	6	0:6	11.094	11.214	3.58875	2.682	-0.906751	0	0.29777	0.798619	-0.270003
00000001_1.tif	0	6	0:6	11.547	11.484	3.58875	2.24529	-1.34346	0	0.29777	0.668581	-0.400042
00000001_1.tif	0	6	0:6	11.646	11.521	3.58875	2.15201	-1.43674	0	0.29777	0.640804	-0.427818
00000001_1.tif	0	6	0:6	11.766	11.682	3.58875	2.06376	-1.52499	0	0.29777	0.614527	-0.454095
00000001_1.tif	0	6	0:6	10.599	10.344	3.58875	3.29397	-0.294783	0	0.29777	0.980845	-0.0877775
00000001_1.tif	0	6	0:6	10.818	10.375	3.58875	3.07468	-0.514067	0	0.29777	0.915549	-0.153074
00000001_1.tif	0	6	0:6	10.828	10.25	3.58875	3.10161	-0.487139	0	0.29777	0.923567	-0.145055
00000001_1.tif	0	6	0:6	11.141	10.411	3.58875	2.75464	-0.834113	0	0.29777	0.820249	-0.248374
00000001_1.tif	0	6	0:6	11.245	10.323	3.58875	2.68325	-0.905499	0	0.29777	0.798992	-0.269631
00000001_1.tif	0	6	0:6	11.266	10.229	3.58875	2.69635	-0.892397	0	0.29777	0.802893	-0.265729
00000001_1.tif	0	6	0:6	11.333	10.193	3.58875	2.64777	-0.940981	0	0.29777	0.788427	-0.280196
00000001_1.tif	0	6	0:6	11.37	10.099	3.58875	2.6518	-0.936948	0	0.29777	0.789627	-0.278995
00000001_1.tif	0	6	0:6	11.385	10.286	3.58875	2.56477	-1.02398	0	0.29777	0.763713	-0.30491
00000001_1.tif	0	6	0:6	11.344	10.521	3.58875	2.52881	-1.05994	0	0.29777	0.753003	-0.315619
00000001_1.tif	0	6	0:6	11.818	10.5	3.58875	2.08412	-1.50463	0	0.29777	0.620589	-0.448034
00000001_1.tif	0	6	0:6	12.438	10.99	3.58875	1.35662	-2.23213	0	0.29777	0.403961	-0.664662
00000001_1.tif	0	6	0:6	12.443	10.891	3.58875	1.37158	-2.21718	0	0.29777	0.408414	-0.660209
00000001_1.tif	0	6	0:6	12.271	11.693	3.58875	1.57939	-2.00936	0	0.29777	0.470294	-0.598328
00000001_1.tif	0	6	0:6	12.516	11.443	3.58875	1.28064	-2.30811	0	0.29777	0.381336	-0.687286
00000001_1.tif	0	6	0:6	12.88	11.542	3.58875	0.954149	-2.6346	0	0.29777	0.284117	-0.784506
00000001_1.tif	0	6	0:6	12.922	11.312	3.58875	0.859605	-2.72915	0	0.29777	0.255964	-0.812658
00000001_1.tif	0	6	0:6	13.917	11.344	3.58875	0.191784	-3.39697	0	0.29777	0.0571074	-1.01152
00000001_1.tif	0	6	0:6	13.401	11.135	3.58875	0.383231	-3.20552	0	0.29777	0.114115	-0.954508
00000001_1.tif	0	6	0:6	13.167	11.068	3.58875	0.626256	-2.9625	0	0.29777	0.18648	-0.882142
00000001_1.tif	0	6	0:6	13.286	10.802	3.58875	0.640191	-2.94856	0	0.29777	0.19063	-0.877993
00000001_1.tif	0	6	0:6	13.094	10.714	3.58875	0.84565	-2.7431	0	0.29777	0.251809	-0.816813
00000001_1.tif	0	6	0:6	12.87	10.844	3.58875	0.97864	-2.61011	0	0.29777	0.29141	-0.777213
00000001_1.tif	0	6	0:6	12.875	10.641	3.58875	1.06777	-2.52098	0	0.29777	0.317949	-0.750673
00000001_1.tif	0	6	0:6	12.943	10.615	3.58875	1.02601	-2.56274	0	0.29777	0.305514	-0.763108
00000001_1.tif	0	6	0:6	14.031	10.615	3.58875	0.651019	-2.93773	0	0.29777	0.193854	-0.874769
00000001_1.tif	0	6	0:6	14.068	10.474	3.58875	0.795527	-2.79322	0	0.29777	0.236884	-0.831738
00000001_1.tif	0	6	0:6	13.87	10.51	3.58875	0.710248	-2.8785	0	0.29777	0.211491	-0.857132
00000001_1.tif	0	6	0:6	13.781	10.5	3.58875	0.714018	-2.87473	0	0.29777	0.212613	-0.856009
00000001_1.tif	0	6	0:6	13.5	10.458	3.58875	0.804806	-2.78395	0	0.29777	0.239647	-0.828976
00000001_1.tif	0	6	0:6	12.557	10.599	3.58875	1.36535	-2.2234	0	0.29777	0.406561	-0.662062
00000001_1.tif	0	6	0:6	12.495	10.49	3.58875	1.47144	-2.11731	0	0.29777	0.438151	-0.630472
00000001_1.tif	0	6	0:6	12.677	10.349	3.58875	1.39858	-2.19017	0	0.29777	0.416455	-0.652167
00000001_1.tif	0	6	0:6	12.615	10.255	3.58875	1.50586	-2.0829	0	0.29777	0.448399	-0.620224
00000001_1.tif	0	6	0:6	12.448	10.344	3.58875	1.5876	-2.00115	0	0.29777	0.472741	-0.595882
00000001_1.tif	0	6	0:6	12.365	10.219	3.58875	1.72654	-1.86221	0	0.29777	0.514112	-0.55451
00000001_1.tif	0	6	0:6	12.521	10.115	3.58875	1.66818	-1.92057	0	0.29777	0.496734	-0.571888
00000001_1.tif	0	6	0:6	12.578	10.047	3.58875	1.67245	-1.9163	0	0.29777	0.498006	-0.570617
00000001_1.tif	0	6	0:6	11.828	9.974	3.58875	2.30918	-1.27957	0	0.29777	0.687604	-0.381018
00000001_1.tif	0	6	0:6	11.802	9.844	3.58875	2.40283	-1.18592	0	0.29777	0.71549	-0.353133
00000001_1.tif	0	6	0:6	12.188	9.812	3.58875	2.11834	-1.47042	0	0.29777	0.630777	-0.437846
00000001_1.tif	0	6	0:6	12.188	9.667	3.58875	2.21697	-1.37178	0	0.29777	0.660147	-0.408476
00000001_1.tif	0	6	0:6	12.375	9.812	3.58875	1.98202	-1.60673	0	0.29777	0.590186	-0.478436
00000001_1.tif	0	6	0:6	11.635	9.062	3.58875	3.03562	-0.553132	0	0.29777	0.903916	-0.164706
00000001_1.tif	0	6	0:6	11.703	9.089	3.58875	2.96866	-0.620089	0	0.29777	0.883978	-0.184644
00000001_1.tif	0	6	0:6	12.25	9.229	3.58875	2.50378	-1.08497	0	0.29777	0.74555	-0.323073
00000001_1.tif	0	6	0:6	12.479	9.089	3.58875	2.48954	-1.09921	0	0.29777	0.741312	-0.327311
00000001_1.tif	0	6	0:6	12.604	8.917	3.58875	2.57872	-1.01003	0	0.29777	0.767865	-0.300757
00000001_1.tif	0	6	0:6	12.891	8.958	3.58875	2.42338	-1.16537	0	0.29777	0.721609	-0.347013
00000001_1.tif	0	6	0:6	14.021	9.438	3.58875	1.79282	-1.79593	0	0.29777	0.533848	-0.534775
00000001_1.tif	0	6	0:6	14.021	9.375	3.58875	1.85525	-1.7335	0	0.29777	0.552437	-0.516185
00000001_1.tif	0	6	0:6	14.062	8.953	3.58875	2.27902	-1.30973	0	0.29777	0.678623	-0.39
00000001_1.tif	0	6	0:6	13.979	8.76	3.58875	2.46238	-1.12637	0	0.29777	0.733223	-0.335399
00000001_1.tif	0	6	0:6	13.167	8.719	3.58875	2.56825	-1.0205	0	0.29777	0.764748	-0.303875
00000001_1.tif	0	6	0:6	13.542	8.615	3.58875	2.60951	-0.979239	0	0.29777	0.777035	-0.291588
00000001_1.tif	0	6	0:6	13.609	8.578	3.58875	2.64128	-0.947467	0	0.29777	0.786495	-0.282127
00000001_1.tif	0	6	0:6	13.422	8.365	3.58875	2.87091	-0.717843	0	0.29777	0.85487	-0.213752
00000001_1.tif	0	6	0:6	15.786	5.422	3.58875	6.13085	2.5421	1	0.29777	1.82558	0.756962
00000001_1.tif	0	6	0:6	15.802	5.531	3.58875	6.03334	2.44459	1	0.29777	1.79655	0.727925
00000001_1.tif	0	6	0:6	14.495	8.823	3.58875	2.49677	-1.09199	0	0.29777	0.743462	-0.32516
00000001_1.tif	0	6	0:6	14.203	8.359	3.58875	2.88675	-0.701996	0	0.29777	0.859589	-0.209033
00000001_1.tif	0	6	0:6	14.182	9.453	3.58875	1.8072	-1.78156	0	0.29777	0.538129	-0.530494
00000001_1.tif	0	6	0:6	14.49	9	3.58875	2.32628	-1.26247	0	0.29777	0.692697	-0.375925
00000001_1.tif	0	6	0:6	14.792	8.818	3.58875	2.60251	-0.986239	0	0.29777	0.77495	-0.293672
00000001_1.tif	0	6	0:6	15.01	9.255	3.58875	2.31526	-1.27349	0	0.29777	0.689415	-0.379207
00000001_1.tif	0	6	0:6	15.536	9.12	3.58875	2.7354	-0.853347	0	0.29777	0.814521	-0.254101
00000001_1.tif	0	6	0:6	15.797	8.714	3.58875	3.21472	-0.374029	0	0.29777	0.957248	-0.111375
00000001_1.tif	0	6	0:6	16.25	8.797	3.58875	3.45869	-0.130057	0	0.29777	1.0299	-0.0387271
00000001_1.tif	0	6	0:6	16.255	8.865	3.58875	3.41515	-0.173602	0	0.29777	1.01693	-0.0516936
00000001_1.tif	0	6	0:6	16.255	8.953	3.58875	3.35523	-0.233522	0	0.29777	0.999087	-0.0695359
00000001_1.tif	0	6	0:6	16.865	9.208	3.58875	3.6832	0.0944479	1	0.29777	1.09675	0.0281238
00000001_1.tif	0	6	0:6	16.938	9.094	3.58875	3.80692	0.218169	1	0.29777	1.13359	0.0649642
00000001_1.tif	0	6	0:6	17.068	9.099	3.58875	3.91286	0.324111	1	0.29777	1.16513	0.0965104
00000001_1.tif	0	6	0:6	15.948	9.568	3.58875	2.72523	-0.863517	0	0.29777	0.811493	-0.25713
00000001_1.tif	0	6	0:6	15.901	9.646	3.58875	2.64088	-0.947871	0	0.29777	0.786375	-0.282248
00000001_1.tif	0	6	0:6	15.823	9.667	3.58875	2.56582	-1.02293	0	0.29777	0.764023	-0.304599
00000001_1.tif	0	6	0:6	16.583	9.625	3.58875	3.22555	-0.363202	0	0.29777	0.960472	-0.108151
00000001_1.tif	0	6	0:6	14.906	9.771	3.58875	1.8328	-1.75595	0	0.29777	0.545752	-0.52287
00000001_1.tif	0	6	0:6	15.047	9.943	3.58875	1.79747	-1.79129	0	0.29777	0.535231	-0.533391
00000001_1.tif	0	6	0:6	14.833	10.396	3.58875	1.33655	-2.2522	0	0.29777	0.397985	-0.670637
00000001_1.tif	0	6	0:6	14.24	11.047	3.58875	0.493138	-3.09561	0	0.29777	0.146842	-0.921781
00000001_1.tif	0	6	0:6	14.38	11.057	3.58875	0.624071	-2.96468	0	0.29777	0.18583	-0.882793
00000001_1.tif	0	6	0:6	14.344	10.911	3.58875	0.643765	-2.94499	0	0.29777	0.191694	-0.876929
00000001_1.tif	0	6	0:6	14.328	10.766	3.58875	0.710921	-2.87783	0	0.29777	0.211691	-0.856932
00000001_1.tif	0	6	0:6	15.667	9.844	3.58875	2.33512	-1.25363	0	0.29777	0.695328	-0.373294
00000001_1.tif	0	6	0:6	15.604	9.901	3.58875	2.25068	-1.33807	0	0.29777	0.670184	-0.398438
00000001_1.tif	0	6	0:6	15.745	9.922	3.58875	2.35504	-1.23371	0	0.29777	0.701261	-0.367361
00000001_1.tif	0	6	0:6	15.552	10.125	3.58875	2.08329	-1.50546	0	0.29777	0.620341	-0.448281
00000001_1.tif	0	6	0:6	15.63	10.062	3.58875	2.18276	-1.406	0	0.29777	0.649959	-0.418663
00000001_1.tif	0	6	0:6	15.672	10.224	3.58875	2.13891	-1.44985	0	0.29777	0.636902	-0.431721
00000001_1.tif	0	6	0:6	15.818	10.219	3.58875	2.27152	-1.31723	0	0.29777	0.67639	-0.392233
00000001_1.tif	0	6	0:6	16.318	9.948	3.58875	2.83981	-0.748942	0	0.29777	0.84561	-0.223012
00000001_1.tif	0	6	0:6	16.438	9.943	3.58875	2.94986	-0.638889	0	0.29777	0.87838	-0.190242
00000001_1.tif	0	6	0:6	16.448	10.078	3.58875	2.90346	-0.685291	0	0.29777	0.864563	-0.204059
00000001_1.tif	0	6	0:6	16.578	10.281	3.58875	2.95325	-0.6355	0	0.29777	0.87939	-0.189233
00000001_1.tif	0	6	0:6	16.651	10.682	3.58875	2.92381	-0.664944	0	0.29777	0.870622	-0.198
00000001_1.tif	0	6	0:6	14.182	11.516	3.58875	0.506004	-3.08275	0	0.29777	0.150673	-0.91795
00000001_1.tif	0	6	0:6	15.177	10.891	3.58875	1.43775	-2.151	0	0.29777	0.428119	-0.640503
00000001_1.tif	0	6	0:6	15.203	10.693	3.58875	1.51913	-2.06962	0	0.29777	0.452353	-0.61627
00000001_1.tif	0	6	0:6	15.151	10.609	3.58875	1.50222	-2.08654	0	0.29777	0.447315	-0.621308
00000001_1.tif	0	6	0:6	15.807	10.641	3.58875	2.11028	-1.47847	0	0.29777	0.628379	-0.440244
00000001_1.tif	0	6	0:6	15.849	10.568	3.58875	2.17132	-1.41743	0	0.29777	0.646555	-0.422068
00000001_1.tif	0	6	0:6	15.911	10.531	3.58875	2.24159	-1.34716	0	0.29777	0.667477	-0.401145
00000001_1.tif	0	6	0:6	15.865	10.911	3.58875	2.11086	-1.47789	0	0.29777	0.628551	-0.440072
00000001_1.tif	0	6	0:6	15.88	10.797	3.58875	2.14493	-1.44383	0	0.29777	0.638694	-0.429928
00000001_1.tif	0	6	0:6	16.13	10.75	3.58875	2.39929	-1.18946	0	0.29777	0.714438	-0.354185
00000001_1.tif	0	6	0:6	16.245	10.776	3.58875	2.50755	-1.0812	0	0.29777	0.746673	-0.321949
00000001_1.tif	0	6	0:6	16.208	10.672	3.58875	2.49166	-1.09709	0	0.29777	0.741943	-0.32668
00000001_1.tif	0	6	0:6	16.281	10.583	3.58875	2.58325	-1.0055	0	0.29777	0.769215	-0.299408
00000001_1.tif	0	6	0:6	14.964	11.599	3.58875	1.24883	-2.33992	0	0.29777	0.371863	-0.696759
00000001_1.tif	0	6	0:6	16.193	11.172	3.58875	2.41736	-1.17139	0	0.29777	0.719819	-0.348804
00000001_1.tif	0	6	0:6	16.703	11.203	3.58875	2.92702	-0.661731	0	0.29777	0.871579	-0.197044
00000001_1.tif	0	6	0:6	16.073	11.432	3.58875	2.30732	-1.28143	0	0.29777	0.687051	-0.381571
00000001_1.tif	0	6	0:6	16.271	11.552	3.58875	2.51779	-1.07096	0	0.29777	0.749722	-0.3189
00000001_1.tif	0	6	0:6	16.01	11.922	3.58875	2.34351	-1.24525	0	0.29777	0.697826	-0.370797
00000001_1.tif	0	6	0:6	16.021	11.839	3.58875	2.33038	-1.25838	0	0.29777	0.693916	-0.374707
00000001_1.tif	0	6	0:6	16.302	11.792	3.58875	2.59129	-0.997466	0	0.29777	0.771607	-0.297015
00000001_1.tif	0	6	0:6	15.87	12.167	3.58875	2.30066	-1.28809	0	0.29777	0.685068	-0.383554
00000001_1.tif	0	6	0:6	15.932	12.12	3.58875	2.33863	-1.25013	0	0.29777	0.696373	-0.37225
00000001_1.tif	0	6	0:6	16.229	12.271	3.58875	2.67104	-0.917711	0	0.29777	0.795356	-0.273267
00000001_1.tif	0	6	0:6	16.474	12.161	3.58875	2.85937	-0.729379	0	0.29777	0.851435	-0.217187
00000001_1.tif	0	6	0:6	16.62	12.328	3.58875	3.0544	-0.534356	0	0.29777	0.909507	-0.159115
00000001_1.tif	0	6	0:6	16.458	12.672	3.58875	3.05269	-0.536066	0	0.29777	0.908998	-0.159624
00000001_1.tif	0	6	0:6	16.625	12.667	3.58875	3.19813	-0.390625	0	0.29777	0.952306	-0.116317
00000001_1.tif	0	6	0:6	16.729	12.109	3.58875	3.08565	-0.503102	0	0.29777	0.918814	-0.149809
00000001_1.tif	0	6	0:6	16.667	11.995	3.58875	2.99464	-0.594116	0	0.29777	0.891713	-0.17691
00000001_1.tif	0	6	0:6	14.141	12.245	3.58875	1.0937	-2.49505	0	0.29777	0.325672	-0.742951
00000001_1.tif	0	6	0:6	14.193	12.188	3.58875	1.05951	-2.52924	0	0.29777	0.315491	-0.753132
00000001_1.tif	0	6	0:6	14.401	12.292	3.58875	1.24608	-2.34267	0	0.29777	0.371044	-0.697578
00000001_1.tif	0	6	0:6	14.542	12.354	3.58875	1.37345	-2.2153	0	0.29777	0.408971	-0.659651
00000001_1.tif	0	6	0:6	14.828	12.307	3.58875	1.51702	-2.07173	0	0.29777	0.451723	-0.616899
00000001_1.tif	0	6	0:6	15.281	12.599	3.58875	2.0453	-1.54345	0	0.29777	0.609029	-0.459594
00000001_1.tif	0	6	0:6	18.182	14.964	3.58875	5.78579	2.19704	1	0.29777	1.72283	0.654211
00000001_1.tif	0	6	0:6	14.557	13.792	3.58875	2.6937	-0.895047	0	0.29777	0.802104	-0.266518
00000001_1.tif	0	6	0:6	14.62	13.76	3.58875	2.68225	-0.906504	0	0.29777	0.798693	-0.26993
00000001_1.tif	0	6	0:6	14.51	13.427	3.58875	2.33155	-1.2572	0	0.29777	0.694266	-0.374357
00000001_1.tif	0	6	0:6	14.568	13.344	3.58875	2.27248	-1.31627	0	0.29777	0.676676	-0.391946
00000001_1.tif	0	6	0:6	14.609	13.146	3.58875	2.10393	-1.48482	0	0.29777	0.626487	-0.442136
00000001_1.tif	0	6	0:6	14.615	12.818	3.58875	1.81018	-1.77858	0	0.29777	0.539016	-0.529606
00000001_1.tif	0	6	0:6	14.651	12.703	3.58875	1.72706	-1.86169	0	0.29777	0.514267	-0.554355
00000001_1.tif	0	6	0:6	14.76	13.005	3.58875	2.04351	-1.54524	0	0.29777	0.608496	-0.460126
00000001_1.tif	0	6	0:6	14.849	13.016	3.58875	2.09727	-1.49148	0	0.29777	0.624503	-0.444119
00000001_1.tif	0	6	0:6	15.156	13.583	3.58875	2.74163	-0.847117	0	0.29777	0.816377	-0.252246
00000001_1.tif	0	6	0:6	15.255	13.505	3.58875	2.72693	-0.861826	0	0.29777	0.811997	-0.256626
00000001_1.tif	0	6	0:6	15.865	13.391	3.58875	3.01716	-0.571592	0	0.29777	0.89842	-0.170203
00000001_1.tif	0	6	0:6	15.656	13.062	3.58875	2.63619	-0.95256	0	0.29777	0.784979	-0.283644
00000001_1.tif	0	6	0:6	15.729	12.974	3.58875	2.62903	-0.959719	0	0.29777	0.782847	-0.285776
00000001_1.tif	0	6	0:6	16.036	12.812	3.58875	2.76789	-0.820863	0	0.29777	0.824194	-0.244428
00000001_1.tif	0	6	0:6	17.146	17.208	3.58875	6.8764	3.28765	1	0.29777	2.04759	0.978964
00000001_1.tif	0	6	0:6	17.109	18.969	3.58875	8.44091	4.85216	1	0.29777	2.51345	1.44483
00000001_1.tif	0	6	0:6	14.526	16.667	3.58875	5.50434	1.91558	1	0.29777	1.63903	0.570403
00000001_1.tif	0	6	0:6	15.474	17.693	3.58875	6.69781	3.10906	1	0.29777	1.99441	0.925784
00000001_1.tif	0	6	0:6	15.594	17.755	3.58875	6.78895	3.2002	1	0.29777	2.02154	0.952922
00000001_1.tif	0	6	0:6	16.307	17.932	3.58875	7.17896	3.59021	1	0.29777	2.13768	1.06906
00000001_1.tif	0	6	0:6	20.807	17.373	3.58875	9.3471	5.75835	1	0.29777	2.78329	1.71466
00000001_1.tif	0	6	0:6	19.252	14.491	3.58875	6.38164	2.79289	1	0.29777	1.90026	0.831638
00000001_1.tif	0	6	0:6	21.481	14.589	3.58875	8.41176	4.82301	1	0.29777	2.50477	1.43615
00000001_1.tif	0	6	0:6	21.391	14.401	3.58875	8.25501	4.66626	1	0.29777	2.45809	1.38947
00000001_1.tif	0	6	0:6	20.835	12.293	3.58875	7.14099	3.55224	1	0.29777	2.12637	1.05775
00000001_1.tif	0	6	0:6	20.731	12.168	3.58875	7.02012	3.43137	1	0.29777	2.09038	1.02176
00000001_1.tif	0	6	0:6	19.411	12.286	3.58875	5.73606	2.14731	1	0.29777	1.70803	0.639405
00000001_1.tif	0	6	0:6	19.96	11.87	3.58875	6.2187	2.62995	1	0.29777	1.85174	0.783119
00000001_1.tif	0	6	0:6	19.342	7.901	3.58875	6.47737	2.88862	1	0.29777	1.92877	0.860144
00000001_1.tif	0	6	0:6	19.161	7.797	3.58875	6.37763	2.78887	1	0.29777	1.89907	0.830443
00000001_1.tif	0	6	0:6	19.168	7.477	3.58875	6.5604	2.97165	1	0.29777	1.95349	0.884867
00000001_1.tif	0	6	0:6	19.814	7.359	3.58875	7.16369	3.57494	1	0.29777	2.13313	1.06451
0000003_16.tif	5	1	5:1	9.604	12.25	5.052	5.70161	0.649605	1	0.29777	1.69777	0.193433
0000003_16.tif	5	1	5:1	11.384	11.658	5.052	3.8556	-1.1964	0	0.29777	1.14808	-0.356253
0000003_16.tif	5	1	5:1	12.016	11.901	5.052	3.26651	-1.78549	0	0.29777	0.972669	-0.531666
0000003_16.tif	5	1	5:1	13.328	17.016	5.052	6.05866	1.00666	1	0.29777	1.80409	0.299754
0000003_16.tif	5	1	5:1	13.349	16.964	5.052	6.00271	0.950707	1	0.29777	1.78743	0.283092
0000003_16.tif	5	1	5:1	12.224	16.453	5.052	5.99477	0.942769	1	0.29777	1.78506	0.280728
0000003_16.tif	5	1	5:1	17.089	16.134	5.052	5.22042	0.168417	1	0.29777	1.55448	0.0501496
0000003_16.tif	5	1	5:1	17.415	16.03	5.052	5.25122	0.199219	1	0.29777	1.56366	0.0593213
0000003_16.tif	5	1	5:1	17.012	15.384	5.052	4.49691	-0.555089	0	0.29777	1.33905	-0.165289
0000003_16.tif	5	1	5:1	15.651	13.8	5.052	2.57648	-2.47553	0	0.29777	0.767197	-0.737138
0000003_16.tif	5	1	5:1	19.179	14.988	5.052	5.43871	0.38671	1	0.29777	1.61949	0.115151
0000003_16.tif	5	1	5:1	19.311	14.752	5.052	5.37945	0.327452	1	0.29777	1.60184	0.0975055
0000003_16.tif	5	1	5:1	14.651	11.595	5.052	0.659431	-4.39257	0	0.29777	0.196359	-1.30798
0000003_16.tif	5	1	5:1	14.977	11.255	5.052	0.242052	-4.80995	0	0.29777	0.0720757	-1.43226
0000003_16.tif	5	1	5:1	18.887	11.38	5.052	3.66996	-1.38204	0	0.29777	1.0928	-0.41153
0000003_16.tif	5	1	5:1	18.561	11.061	5.052	3.34792	-1.70408	0	0.29777	0.99691	-0.507425
0000003_16.tif	5	1	5:1	18.873	10.755	5.052	3.68873	-1.36327	0	0.29777	1.09839	-0.405941
0000003_16.tif	5	1	5:1	19.276	10.161	5.052	4.20322	-0.848783	0	0.29777	1.25159	-0.252742
0000003_16.tif	5	1	5:1	19.304	10.071	5.052	4.25452	-0.797481	0	0.29777	1.26687	-0.237466
0000003_16.tif	5	1	5:1	17.123	10.106	5.052	2.22642	-2.82559	0	0.29777	0.66296	-0.841374
0000003_16.tif	5	1	5:1	15.415	9.884	5.052	1.38989	-3.66211	0	0.29777	0.413867	-1.09047
0000003_16.tif	5	1	5:1	15.568	9.786	5.052	1.51475	-3.53725	0	0.29777	0.451048	-1.05329
0000003_16.tif	5	1	5:1	13.922	7.752	5.052	3.74009	-1.31191	0	0.29777	1.11369	-0.390648
0000003_16.tif	5	1	5:1	13.977	7.668	5.052	3.80066	-1.25134	0	0.29777	1.13172	-0.372612
0000003_16.tif	5	1	5:1	13.464	7.002	5.052	4.6055	-0.446506	0	0.29777	1.37138	-0.132956
0000003_16.tif	5	1	5:1	13.922	7.092	5.052	4.36514	-0.686864	0	0.29777	1.29981	-0.204527
0000003_16.tif	5	1	5:1	14.623	7.37	5.052	3.93539	-1.11661	0	0.29777	1.17184	-0.332493
0000003_16.tif	5	1	5:1	17.589	7.849	5.052	4.15353	-0.898471	0	0.29777	1.2368	-0.267538
0000003_16.tif	5	1	5:1	17.123	7.641	5.052	4.0893	-0.962702	0	0.29777	1.21767	-0.286664
0000003_16.tif	5	1	5:1	11.229	9.359	5.052	4.41972	-0.632285	0	0.29777	1.31606	-0.188275
0000003_16.tif	5	1	5:1	12.786	8.896	5.052	3.39234	-1.65966	0	0.29777	1.01014	-0.494197
0000003_16.tif	5	1	5:1	12.792	8.802	5.052	3.45429	-1.59772	0	0.29777	1.02858	-0.475752
0000003_16.tif	5	1	5:1	12.901	8.844	5.052	3.34816	-1.70384	0	0.29777	0.996982	-0.507353
0000003_16.tif	5	1	5:1	12.938	8.755	5.052	3.38792	-1.66408	0	0.29777	1.00882	-0.495514
0000003_16.tif	5	1	5:1	12.151	8.573	5.052	4.07831	-0.973694	0	0.29777	1.2144	-0.289937
0000003_16.tif	5	1	5:1	12.094	8.286	5.052	4.31397	-0.738036	0	0.29777	1.28457	-0.219765
0000003_16.tif	5	1	5:1	11.901	8.318	5.052	4.43447	-0.617536	0	0.29777	1.32045	-0.183884
0000003_16.tif	5	1	5:1	20.644	12.651	5.052	5.60049	0.54849	1	0.29777	1.66766	0.163324
0000004_14.tif	4	2	4:2	6.25	4.948	4.16665	10.2438	6.07715	1	0.29777	3.05029	1.80959
0000004_14.tif	4	2	4:2	6.036	8.276	4.16665	8.58047	4.41382	1	0.29777	2.55501	1.3143
0000004_14.tif	4	2	4:2	5.585	8.602	4.16665	8.8702	4.70355	1	0.29777	2.64128	1.40058
0000004_14.tif	4	2	4:2	5.557	8.394	4.16665	8.97346	4.80681	1	0.29777	2.67203	1.43132
0000004_14.tif	4	2	4:2	5.453	8.359	4.16665	9.08295	4.91631	1	0.29777	2.70463	1.46393
0000004_14.tif	4	2	4:2	5.391	8.359	4.16665	9.14033	4.97368	1	0.29777	2.72172	1.48101
0000004_14.tif	4	2	4:2	3.62	9.214	4.16665	10.5586	6.39197	1	0.29777	3.14404	1.90334
0000004_14.tif	4	2	4:2	3.613	9.012	4.16665	10.6169	6.45023	1	0.29777	3.16139	1.92069
0000004_14.tif	4	2	4:2	11.568	3.589	4.16665	8.53484	4.3682	1	0.29777	2.54142	1.30072
0000004_14.tif	4	2	4:2	11.637	3.22	4.16665	8.87342	4.70677	1	0.29777	2.64224	1.40154
0000004_14.tif	4	2	4:2	11.63	2.741	4.16665	9.33966	5.17301	1	0.29777	2.78107	1.54037
0000004_14.tif	4	2	4:2	11.839	2.748	4.16665	9.28527	5.11863	1	0.29777	2.76488	1.52417
0000004_14.tif	4	2	4:2	12.658	2.144	4.16665	9.7417	5.57505	1	0.29777	2.90078	1.66008
0000004_14.tif	4	2	4:2	12.832	2.054	4.16665	9.81137	5.64473	1	0.29777	2.92153	1.68083
0000004_14.tif	4	2	4:2	13.477	1.63	4.16665	10.189	6.02233	1	0.29777	3.03397	1.79327
0000004_14.tif	4	2	4:2	13.658	1.714	4.16665	10.0999	5.93326	1	0.29777	3.00745	1.76675
0000004_14.tif	4	2	4:2	15.304	3.311	4.16665	8.62378	4.45713	1	0.29777	2.5679	1.3272
0000004_14.tif	4	2	4:2	15.304	3.137	4.16665	8.79535	4.6287	1	0.29777	2.61899	1.37829
0000004_14.tif	4	2	4:2	14.38	3.415	4.16665	8.41346	4.24681	1	0.29777	2.50528	1.26457
0000004_14.tif	4	2	4:2	17.505	3.995	4.16665	8.62759	4.46094	1	0.29777	2.56904	1.32833
0000004_14.tif	4	2	4:2	17.651	4.03	4.16665	8.65891	4.49226	1	0.29777	2.57836	1.33766
0000004_14.tif	4	2	4:2	18.616	3.87	4.16665	9.26024	5.09359	1	0.29777	2.75742	1.51672
0000004_14.tif	4	2	4:2	20.97	5.238	4.16665	9.68788	5.52123	1	0.29777	2.88476	1.64406
0000004_14.tif	4	2	4:2	21.207	5.307	4.16665	9.81741	5.65077	1	0.29777	2.92333	1.68263
0000004_14.tif	4	2	4:2	21.964	6.335	4.16665	9.7862	5.61955	1	0.29777	2.91404	1.67333
0000004_14.tif	4	2	4:2	19.95	5.377	4.16665	8.864	4.69735	1	0.29777	2.63943	1.39873
0000004_14.tif	4	2	4:2	19.984	5.516	4.16665	8.78729	4.62065	1	0.29777	2.61659	1.37589
0000004_14.tif	4	2	4:2	21.005	7.446	4.16665	8.37847	4.21182	1	0.29777	2.49486	1.25415
0000004_14.tif	4	2	4:2	20.491	7.585	4.16665	7.86875	3.70211	1	0.29777	2.34308	1.10238
0000004_14.tif	4	2	4:2	15.651	20.693	4.16665	9.06098	4.89433	1	0.29777	2.69809	1.45739
0000004_14.tif	4	2	4:2	15.845	20.554	4.16665	8.96586	4.79921	1	0.29777	2.66976	1.42906
0000004_14.tif	4	2	4:2	22.845	14.429	4.16665	9.36412	5.19748	1	0.29777	2.78835	1.54765
0000004_14.tif	4	2	4:2	22.984	14.297	4.16665	9.46214	5.2955	1	0.29777	2.81754	1.57684
0000004_14.tif	4	2	4:2	22.234	11.655	4.16665	8.38147	4.21482	1	0.29777	2.49575	1.25505
0000004_14.tif	4	2	4:2	22.22	11.523	4.16665	8.37099	4.20434	1	0.29777	2.49263	1.25193
0000004_14.tif	4	2	4:2	13.87	4.995	4.16665	6.81702	2.65037	1	0.29777	2.0299	0.789201
00000005_3.tif	0	6	0:6	10.604	4.167	4.72412	6.63774	1.91362	1	0.29777	1.97652	0.569818
00000005_3.tif	0	6	0:6	10.78	4.168	4.72412	6.52272	1.7986	1	0.29777	1.94227	0.535568
00000005_3.tif	0	6	0:6	13.217	6.352	4.72412	3.31729	-1.40683	0	0.29777	0.987789	-0.418913
00000005_3.tif	0	6	0:6	13.28	6.311	4.72412	3.31982	-1.40431	0	0.29777	0.988542	-0.418161
00000005_3.tif	0	6	0:6	13.259	6.693	4.72412	3.00873	-1.71539	0	0.29777	0.89591	-0.510792
00000005_3.tif	0	6	0:6	13.203	6.644	4.72412	3.08089	-1.64323	0	0.29777	0.917398	-0.489305
00000005_3.tif	0	6	0:6	13.078	6.609	4.72412	3.18213	-1.54199	0	0.29777	0.947543	-0.459159
00000005_3.tif	0	6	0:6	12.911	6.491	4.72412	3.37677	-1.34735	0	0.29777	1.0055	-0.401202
00000005_3.tif	0	6	0:6	11.092	6.602	4.72412	4.64729	-0.0768357	0	0.29777	1.38382	-0.0228794
00000005_3.tif	0	6	0:6	11.349	6.672	4.72412	4.39525	-0.328873	0	0.29777	1.30877	-0.0979286
00000005_3.tif	0	6	0:6	11.023	6.839	4.72412	4.57978	-0.144345	0	0.29777	1.36372	-0.0429816
00000005_3.tif	0	6	0:6	11.168	6.818	4.72412	4.46665	-0.257477	0	0.29777	1.33003	-0.0766689
00000005_3.tif	0	6	0:6	11.113	6.95	4.72412	4.44606	-0.278059	0	0.29777	1.3239	-0.0827978
00000005_3.tif	0	6	0:6	12.939	7.175	4.72412	2.84405	-1.88007	0	0.29777	0.846873	-0.559829
00000005_3.tif	0	6	0:6	12.793	7.377	4.72412	2.81696	-1.90716	0	0.29777	0.838806	-0.567896
00000005_3.tif	0	6	0:6	13.148	8.252	4.72412	2.03574	-2.68838	0	0.29777	0.606184	-0.800519
00000005_3.tif	0	6	0:6	12.078	8.161	4.72412	3.05796	-1.66616	0	0.29777	0.910569	-0.496134
00000005_3.tif	0	6	0:6	11.523	9.55	4.72412	3.4617	-1.26242	0	0.29777	1.03079	-0.375912
00000005_3.tif	0	6	0:6	11.655	9.641	4.72412	3.34207	-1.38205	0	0.29777	0.995169	-0.411534
00000005_3.tif	0	6	0:6	11.269	10.155	4.72412	3.82352	-0.900602	0	0.29777	1.13853	-0.268172
00000005_3.tif	0	6	0:6	11.714	10.394	4.72412	3.47214	-1.25198	0	0.29777	1.0339	-0.372802
00000005_3.tif	0	6	0:6	12.113	10.398	4.72412	3.10343	-1.62069	0	0.29777	0.924108	-0.482594
00000005_3.tif	0	6	0:6	12.307	10.408	4.72412	2.93042	-1.79371	0	0.29777	0.87259	-0.534112
00000005_3.tif	0	6	0:6	12.665	10.658	4.72412	2.73744	-1.98668	0	0.29777	0.815129	-0.591574
00000005_3.tif	0	6	0:6	12.359	9.644	4.72412	2.64742	-2.07671	0	0.29777	0.788321	-0.618381
00000005_3.tif	0	6	0:6	12.568	9.648	4.72412	2.44282	-2.2813	0	0.29777	0.7274	-0.679302
00000005_3.tif	0	6	0:6	12.745	9.398	4.72412	2.23048	-2.49364	0	0.29777	0.66417	-0.742532
00000005_3.tif	0	6	0:6	12.898	9.418	4.72412	2.08059	-2.64353	0	0.29777	0.619539	-0.787164
00000005_3.tif	0	6	0:6	12.96	9.227	4.72412	2.00475	-2.71937	0	0.29777	0.596956	-0.809746
00000005_3.tif	0	6	0:6	13.408	9.47	4.72412	1.58428	-3.13984	0	0.29777	0.471751	-0.934951
00000005_3.tif	0	6	0:6	13.762	9.29	4.72412	1.20778	-3.51635	0	0.29777	0.35964	-1.04706
00000005_3.tif	0	6	0:6	13.998	9.832	4.72412	1.16994	-3.55419	0	0.29777	0.348373	-1.05833
00000005_3.tif	0	6	0:6	13.755	9.894	4.72412	1.40818	-3.31595	0	0.29777	0.419313	-0.987389
00000005_3.tif	0	6	0:6	13.505	10.016	4.72412	1.68553	-3.03859	0	0.29777	0.501901	-0.904801
00000005_3.tif	0	6	0:6	14.297	10.668	4.72412	1.63796	-3.08617	0	0.29777	0.487735	-0.918968
00000005_3.tif	0	6	0:6	12.825	10.939	4.72412	2.77446	-1.94967	0	0.29777	0.82615	-0.580552
00000005_3.tif	0	6	0:6	13.03	10.95	4.72412	2.6271	-2.09703	0	0.29777	0.782271	-0.624432
00000005_3.tif	0	6	0:6	11.717	10.762	4.72412	3.6154	-1.10872	0	0.29777	1.07656	-0.330145
00000005_3.tif	0	6	0:6	12.87	11.366	4.72412	3.0329	-1.69123	0	0.29777	0.903106	-0.503596
00000005_3.tif	0	6	0:6	12.852	11.516	4.72412	3.15514	-1.56899	0	0.29777	0.939505	-0.467198
00000005_3.tif	0	6	0:6	12.929	11.599	4.72412	3.16726	-1.55686	0	0.29777	0.943116	-0.463586
00000005_3.tif	0	6	0:6	12.991	11.661	4.72412	3.17614	-1.54799	0	0.29777	0.945758	-0.460944
00000005_3.tif	0	6	0:6	12.269	11.95	4.72412	3.87044	-0.853683	0	0.29777	1.1525	-0.254201
00000005_3.tif	0	6	0:6	13.29	11.314	4.72412	2.71854	-2.00559	0	0.29777	0.809499	-0.597204
00000005_3.tif	0	6	0:6	13.599	11.731	4.72412	2.90029	-1.82383	0	0.29777	0.863621	-0.543082
00000005_3.tif	0	6	0:6	14.016	11.72	4.72412	2.71864	-2.00548	0	0.29777	0.80953	-0.597173
00000005_3.tif	0	6	0:6	14.245	11.592	4.72412	2.52455	-2.19957	0	0.29777	0.751736	-0.654967
00000005_3.tif	0	6	0:6	13.967	11.321	4.72412	2.36901	-2.35511	0	0.29777	0.70542	-0.701282
00000005_3.tif	0	6	0:6	14.061	12.863	4.72412	3.79985	-0.92427	0	0.29777	1.13148	-0.27522
00000005_3.tif	0	6	0:6	14.092	12.748	4.72412	3.68078	-1.04334	0	0.29777	1.09603	-0.310676
00000005_3.tif	0	6	0:6	12.995	12.714	4.72412	4.0525	-0.671627	0	0.29777	1.20671	-0.19999
00000005_3.tif	0	6	0:6	11.033	13.363	4.72412	5.74606	1.02194	1	0.29777	1.71101	0.304303
00000005_3.tif	0	6	0:6	11.321	13.512	4.72412	5.66631	0.942185	1	0.29777	1.68726	0.280554
00000005_3.tif	0	6	0:6	12.519	14.585	4.72412	5.93958	1.21546	1	0.29777	1.76863	0.361926
00000005_3.tif	0	6	0:6	10.505	14.036	4.72412	6.59857	1.87445	1	0.29777	1.96486	0.558155
00000005_3.tif	0	6	0:6	10.51	13.865	4.72412	6.47011	1.74599	1	0.29777	1.92661	0.519903
00000005_3.tif	0	6	0:6	16.885	14.177	4.72412	5.36099	0.636871	1	0.29777	1.59634	0.189641
00000005_3.tif	0	6	0:6	16.974	14.167	4.72412	5.38425	0.660124	1	0.29777	1.60327	0.196565
00000005_3.tif	0	6	0:6	17.068	13.786	4.72412	5.07108	0.346953	1	0.29777	1.51001	0.103312
00000005_3.tif	0	6	0:6	17.021	13.62	4.72412	4.90061	0.176484	1	0.29777	1.45925	0.0525516
00000005_3.tif	0	6	0:6	17.219	13.526	4.72412	4.9033	0.179176	1	0.29777	1.46006	0.0533531
00000005_3.tif	0	6	0:6	16.234	13.203	4.72412	4.22633	-0.497794	0	0.29777	1.25847	-0.148228
00000005_3.tif	0	6	0:6	16.328	13.135	4.72412	4.19117	-0.532958	0	0.29777	1.248	-0.158699
00000005_3.tif	0	6	0:6	16.641	13.083	4.72412	4.25538	-0.468745	0	0.29777	1.26712	-0.139578
00000005_3.tif	0	6	0:6	16.536	12.99	4.72412	4.12896	-0.595164	0	0.29777	1.22948	-0.177222
00000005_3.tif	0	6	0:6	16.052	13.052	4.72412	4.02966	-0.694465	0	0.29777	1.19991	-0.206791
00000005_3.tif	0	6	0:6	16.135	12.979	4.72412	3.98303	-0.741098	0	0.29777	1.18603	-0.220677
00000005_3.tif	0	6	0:6	16.042	12.958	4.72412	3.93648	-0.787643	0	0.29777	1.17217	-0.234536
00000005_3.tif	0	6	0:6	15.307	12.865	4.72412	3.70889	-1.01523	0	0.29777	1.1044	-0.302305
00000005_3.tif	0	6	0:6	15.391	12.802	4.72412	3.65503	-1.0691	0	0.29777	1.08836	-0.318345
00000005_3.tif	0	6	0:6	15.193	12.703	4.72412	3.53842	-1.18571	0	0.29777	1.05363	-0.353068
00000005_3.tif	0	6	0:6	14.885	12.641	4.72412	3.4699	-1.25422	0	0.29777	1.03323	-0.37347
00000005_3.tif	0	6	0:6	14.536	12.427	4.72412	3.28302	-1.44111	0	0.29777	0.977584	-0.429118
00000005_3.tif	0	6	0:6	15.349	12.104	4.72412	2.95717	-1.76695	0	0.29777	0.880556	-0.526146
00000005_3.tif	0	6	0:6	15.349	11.979	4.72412	2.83328	-1.89084	0	0.29777	0.843666	-0.563037
00000005_3.tif	0	6	0:6	14.984	11.891	4.72412	2.71907	-2.00505	0	0.29777	0.809659	-0.597044
00000005_3.tif	0	6	0:6	15.078	11.729	4.72412	2.55954	-2.16458	0	0.29777	0.762154	-0.644548
00000005_3.tif	0	6	0:6	15.094	11.625	4.72412	2.45644	-2.26768	0	0.29777	0.731455	-0.675247
00000005_3.tif	0	6	0:6	15.167	11.552	4.72412	2.38864	-2.33548	0	0.29777	0.711266	-0.695436
00000005_3.tif	0	6	0:6	15.292	11.719	4.72412	2.56803	-2.15609	0	0.29777	0.764683	-0.642019
00000005_3.tif	0	6	0:6	15.667	12.547	4.72412	3.44744	-1.27668	0	0.29777	1.02654	-0.380158
00000005_3.tif	0	6	0:6	15.734	12.516	4.72412	3.43151	-1.29262	0	0.29777	1.0218	-0.384903
00000005_3.tif	0	6	0:6	16.078	12.516	4.72412	3.52467	-1.19945	0	0.29777	1.04954	-0.35716
00000005_3.tif	0	6	0:6	16.88	12.542	4.72412	3.87659	-0.847533	0	0.29777	1.15433	-0.25237
00000005_3.tif	0	6	0:6	15.625	11.651	4.72412	2.56561	-2.15851	0	0.29777	0.763962	-0.64274
00000005_3.tif	0	6	0:6	15.781	11.818	4.72412	2.76926	-1.95486	0	0.29777	0.824603	-0.582099
00000005_3.tif	0	6	0:6	15.922	11.885	4.72412	2.87717	-1.84695	0	0.29777	0.856736	-0.549966
00000005_3.tif	0	6	0:6	15.995	11.948	4.72412	2.96127	-1.76285	0	0.29777	0.881778	-0.524924
00000005_3.tif	0	6	0:6	16.224	11.891	4.72412	2.99676	-1.72737	0	0.29777	0.892345	-0.514357
00000005_3.tif	0	6	0:6	16.339	12.188	4.72412	3.31465	-1.40948	0	0.29777	0.987002	-0.4197
00000005_3.tif	0	6	0:6	16.562	11.984	4.72412	3.23434	-1.48978	0	0.29777	0.963089	-0.443613
00000005_3.tif	0	6	0:6	17.198	11.927	4.72412	3.54694	-1.17718	0	0.29777	1.05617	-0.35053
00000005_3.tif	0	6	0:6	17.734	11.573	4.72412	3.66575	-1.05838	0	0.29777	1.09155	-0.315153
00000005_3.tif	0	6	0:6	17.333	11.365	4.72412	3.22822	-1.4959	0	0.29777	0.961267	-0.445435
00000005_3.tif	0	6	0:6	17.63	11.089	4.72412	3.28366	-1.44046	0	0.29777	0.977776	-0.428926
00000005_3.tif	0	6	0:6	16.922	11.078	4.72412	2.73251	-1.99162	0	0.29777	0.813659	-0.593043
00000005_3.tif	0	6	0:6	18.344	11.021	4.72412	3.85269	-0.871436	0	0.29777	1.14721	-0.259487
00000005_3.tif	0	6	0:6	18.281	10.865	4.72412	3.72408	-1.00005	0	0.29777	1.10892	-0.297784
00000005_3.tif	0	6	0:6	18.318	10.479	4.72412	3.59966	-1.12446	0	0.29777	1.07187	-0.334831
00000005_3.tif	0	6	0:6	18.089	10.495	4.72412	3.39352	-1.33061	0	0.29777	1.01049	-0.396215
00000005_3.tif	0	6	0:6	17.167	10.307	4.72412	2.47819	-2.24593	0	0.29777	0.737931	-0.668771
00000005_3.tif	0	6	0:6	17.224	10.229	4.72412	2.49496	-2.22916	0	0.29777	0.742926	-0.663777
00000005_3.tif	0	6	0:6	16.844	9.875	4.72412	2.00714	-2.71698	0	0.29777	0.597666	-0.809036
00000005_3.tif	0	6	0:6	17.51	9.76	4.72412	2.61302	-2.11111	0	0.29777	0.778078	-0.628624
00000005_3.tif	0	6	0:6	17.266	9.531	4.72412	2.32983	-2.3943	0	0.29777	0.693752	-0.71295
00000005_3.tif	0	6	0:6	14.411	9.464	4.72412	0.625358	-4.09877	0	0.29777	0.186213	-1.22049
00000005_3.tif	0	6	0:6	14.37	9.375	4.72412	0.62773	-4.09639	0	0.29777	0.186919	-1.21978
00000005_3.tif	0	6	0:6	14.698	10.286	4.72412	1.14532	-3.57881	0	0.29777	0.341041	-1.06566
00000005_3.tif	0	6	0:6	15.094	10.25	4.72412	1.08581	-3.63831	0	0.29777	0.323322	-1.08338
00000005_3.tif	0	6	0:6	15.172	10.172	4.72412	1.0214	-3.70272	0	0.29777	0.304143	-1.10256
00000005_3.tif	0	6	0:6	14.948	9.38	4.72412	0.208614	-4.51551	0	0.29777	0.0621191	-1.34458
00000005_3.tif	0	6	0:6	15.729	10.094	4.72412	1.19804	-3.52608	0	0.29777	0.356742	-1.04996
00000005_3.tif	0	6	0:6	15.854	9.854	4.72412	1.12126	-3.60286	0	0.29777	0.333878	-1.07282
00000005_3.tif	0	6	0:6	15.911	9.688	4.72412	1.07845	-3.64567	0	0.29777	0.321132	-1.08557
00000005_3.tif	0	6	0:6	16.271	9.896	4.72412	1.49413	-3.22999	0	0.29777	0.444907	-0.961795
00000005_3.tif	0	6	0:6	16.109	9.651	4.72412	1.24116	-3.48297	0	0.29777	0.369579	-1.03712
00000005_3.tif	0	6	0:6	16.125	9.526	4.72412	1.21377	-3.51035	0	0.29777	0.361424	-1.04528
00000005_3.tif	0	6	0:6	17.141	9.214	4.72412	2.17741	-2.54672	0	0.29777	0.648366	-0.758336
00000005_3.tif	0	6	0:6	14.578	8.38	4.72412	0.881056	-3.84307	0	0.29777	0.262352	-1.14435
00000005_3.tif	0	6	0:6	14.073	7.531	4.72412	1.86729	-2.85684	0	0.29777	0.556022	-0.85068
00000005_3.tif	0	6	0:6	15.328	7.172	4.72412	2.03285	-2.69127	0	0.29777	0.605323	-0.801379
00000005_3.tif	0	6	0:6	15.432	7.135	4.72412	2.09007	-2.63405	0	0.29777	0.62236	-0.784342
00000005_3.tif	0	6	0:6	15.625	7.604	4.72412	1.70163	-3.02249	0	0.29777	0.506694	-0.900008
00000005_3.tif	0	6	0:6	15.953	9.083	4.72412	0.992996	-3.73113	0	0.29777	0.295685	-1.11102
00000005_3.tif	0	6	0:6	16.073	8.99	4.72412	1.12383	-3.60029	0	0.29777	0.334644	-1.07206
00000005_3.tif	0	6	0:6	16.099	8.703	4.72412	1.22808	-3.49604	0	0.29777	0.365686	-1.04102
00000005_3.tif	0	6	0:6	15.984	8.516	4.72412	1.21274	-3.51138	0	0.29777	0.361117	-1.04558
00000005_3.tif	0	6	0:6	16.536	8.344	4.72412	1.77673	-2.94739	0	0.29777	0.529057	-0.877645
00000005_3.tif	0	6	0:6	16.573	8.12	4.72412	1.92239	-2.80173	0	0.29777	0.57243	-0.834272
00000005_3.tif	0	6	0:6	17.125	8.615	4.72412	2.23163	-2.49249	0	0.29777	0.664512	-0.74219
00000005_3.tif	0	6	0:6	17.151	8.547	4.72412	2.27455	-2.44957	0	0.29777	0.677294	-0.729408
00000005_3.tif	0	6	0:6	18.25	8.047	4.72412	3.47324	-1.25088	0	0.29777	1.03423	-0.372475
00000005_3.tif	0	6	0:6	18.323	7.479	4.72412	3.76153	-0.962591	0	0.29777	1.12007	-0.286631
00000005_3.tif	0	6	0:6	17.651	7.839	4.72412	2.99948	-1.72465	0	0.29777	0.893154	-0.513548
00000005_3.tif	0	6	0:6	17.714	7.833	4.72412	3.05866	-1.66546	0	0.29777	0.910778	-0.495924
00000005_3.tif	0	6	0:6	17.448	7.781	4.72412	2.84695	-1.87717	0	0.29777	0.847737	-0.558965
00000005_3.tif	0	6	0:6	17.464	7.859	4.72412	2.82382	-1.9003	0	0.29777	0.840849	-0.565853
00000005_3.tif	0	6	0:6	17.401	8.016	4.72412	2.69728	-2.02685	0	0.29777	0.803168	-0.603534
00000005_3.tif	0	6	0:6	17.458	8.094	4.72412	2.71701	-2.00712	0	0.29777	0.809043	-0.597659
00000005_3.tif	0	6	0:6	16.026	6.411	4.72412	2.9582	-1.76592	0	0.29777	0.880864	-0.525838
00000005_3.tif	0	6	0:6	15.495	6.219	4.72412	3.00036	-1.72376	0	0.29777	0.893418	-0.513285
00000005_3.tif	0	6	0:6	14.177	6.62	4.72412	2.67059	-2.05353	0	0.29777	0.795223	-0.611479
00000005_3.tif	0	6	0:6	13.953	6.536	4.72412	2.82323	-1.9009	0	0.29777	0.840673	-0.56603
00000005_3.tif	0	6	0:6	13.901	6.401	4.72412	2.9679	-1.75623	0	0.29777	0.883751	-0.522952
00000005_3.tif	0	6	0:6	14.073	6.021	4.72412	3.27455	-1.44957	0	0.29777	0.975063	-0.431639
00000005_3.tif	0	6	0:6	13.958	5.688	4.72412	3.62633	-1.09779	0	0.29777	1.07981	-0.326889
00000005_3.tif	0	6	0:6	13.745	5.562	4.72412	3.81026	-0.913866	0	0.29777	1.13458	-0.272122
00000005_3.tif	0	6	0:6	13.698	5.422	4.72412	3.95794	-0.766188	0	0.29777	1.17855	-0.228148
00000005_3.tif	0	6	0:6	13.547	5.568	4.72412	3.87256	-0.851566	0	0.29777	1.15313	-0.253571
00000005_3.tif	0	6	0:6	14.354	5.901	4.72412	3.32739	-1.39673	0	0.29777	0.990798	-0.415905
00000005_3.tif	0	6	0:6	14.167	5.656	4.72412	3.6052	-1.11892	0	0.29777	1.07352	-0.333182
00000005_3.tif	0	6	0:6	14.25	5.552	4.72412	3.68974	-1.03438	0	0.29777	1.09869	-0.308008
00000005_3.tif	0	6	0:6	14.083	4.995	4.72412	4.2689	-0.455226	0	0.29777	1.27115	-0.135552
00000005_3.tif	0	6	0:6	14.281	5.031	4.72412	4.19695	-0.527176	0	0.29777	1.24973	-0.156977
00000005_3.tif	0	6	0:6	14.297	4.885	4.72412	4.33858	-0.385546	0	0.29777	1.2919	-0.114804
00000005_3.tif	0	6	0:6	14.401	4.953	4.72412	4.2564	-0.467725	0	0.29777	1.26743	-0.139274
00000005_3.tif	0	6	0:6	14.479	4.828	4.72412	4.37099	-0.353133	0	0.29777	1.30155	-0.105152
00000005_3.tif	0	6	0:6	14.812	5.073	4.72412	4.10182	-0.622306	0	0.29777	1.2214	-0.185304
00000005_3.tif	0	6	0:6	17.052	5.469	4.72412	4.25111	-0.473012	0	0.29777	1.26585	-0.140849
00000005_3.tif	0	6	0:6	19.094	7.771	4.72412	4.36116	-0.362965	0	0.29777	1.29862	-0.10808
00000005_3.tif	0	6	0:6	24.276	13.009	4.72412	10.0715	5.34742	1	0.29777	2.999	1.5923
00000005_3.tif	0	6	0:6	24.332	12.814	4.72412	10.051	5.32693	1	0.29777	2.9929	1.5862
00000005_3.tif	0	6	0:6	22.582	10.061	4.72412	7.6697	2.94557	1	0.29777	2.28381	0.877103
00000005_6.tif	1	5	1:5	5.708	6.292	4.92706	10.141	5.21397	1	0.29777	3.01969	1.55256
00000005_6.tif	1	5	1:5	6.564	5.349	4.92706	10.0312	5.10416	1	0.29777	2.987	1.51987
00000005_6.tif	1	5	1:5	6.641	5.349	4.92706	9.97315	5.04609	1	0.29777	2.9697	1.50257
00000005_6.tif	1	5	1:5	7.023	5.05	4.92706	9.89408	4.96702	1	0.29777	2.94616	1.47903
00000005_6.tif	1	5	1:5	7.613	4.863	4.92706	9.61452	4.68746	1	0.29777	2.86292	1.39579
00000005_6.tif	1	5	1:5	7.724	4.981	4.92706	9.45252	4.52546	1	0.29777	2.81468	1.34755
00000005_6.tif	1	5	1:5	8.641	5.932	4.92706	8.13174	3.20469	1	0.29777	2.42139	0.954259
00000005_6.tif	1	5	1:5	8.655	6.085	4.92706	8.0102	3.08314	1	0.29777	2.3852	0.918067
00000005_6.tif	1	5	1:5	8.113	8.72	4.92706	6.82773	1.90067	1	0.29777	2.03309	0.565963
00000005_6.tif	1	5	1:5	9.092	9.88	4.92706	5.44906	0.522004	1	0.29777	1.62257	0.155437
00000005_6.tif	1	5	1:5	8.953	10.741	4.92706	5.32449	0.397435	1	0.29777	1.58547	0.118344
00000005_6.tif	1	5	1:5	9.182	11.082	4.92706	5.03374	0.10668	1	0.29777	1.4989	0.0317661
00000005_6.tif	1	5	1:5	9.217	11.262	4.92706	4.97233	0.0452717	1	0.29777	1.48061	0.0134806
00000005_6.tif	1	5	1:5	9.141	11.408	4.92706	5.03082	0.103757	1	0.29777	1.49803	0.0308958
00000005_6.tif	1	5	1:5	9.46	12.731	4.92706	4.75617	-0.170884	0	0.29777	1.41625	-0.0508842
00000005_6.tif	1	5	1:5	9.752	14.536	4.92706	5.11531	0.188252	1	0.29777	1.52319	0.0560557
00000005_6.tif	1	5	1:5	9.856	14.606	4.92706	5.06308	0.136026	1	0.29777	1.50763	0.0405044
00000005_6.tif	1	5	1:5	10.057	14.682	4.92706	4.93611	0.00904806	1	0.29777	1.46982	0.00269424
00000005_6.tif	1	5	1:5	9.939	15.016	4.92706	5.22519	0.298135	1	0.29777	1.55591	0.0887758
00000005_6.tif	1	5	1:5	10.023	15.46	4.92706	5.43617	0.509115	1	0.29777	1.61873	0.151599
00000005_6.tif	1	5	1:5	8.946	16.55	4.92706	6.96453	2.03747	1	0.29777	2.07383	0.606698
00000005_6.tif	1	5	1:5	8.856	16.356	4.92706	6.90571	1.97865	1	0.29777	2.05631	0.589183
00000005_6.tif	1	5	1:5	8.224	16.182	4.92706	7.29797	2.37091	1	0.29777	2.17312	0.705985
00000005_6.tif	1	5	1:5	14.427	19.703	4.92706	7.79107	2.86401	1	0.29777	2.31995	0.852816
00000005_6.tif	1	5	1:5	13.849	19.474	4.92706	7.56283	2.63578	1	0.29777	2.25199	0.784855
00000005_6.tif	1	5	1:5	13.802	19.333	4.92706	7.42397	2.49692	1	0.29777	2.21064	0.743507
00000005_6.tif	1	5	1:5	11.339	18.474	4.92706	7.13257	2.20551	1	0.29777	2.12386	0.656734
00000005_6.tif	1	5	1:5	11.156	18.203	4.92706	6.96088	2.03382	1	0.29777	2.07274	0.605612
00000005_6.tif	1	5	1:5	11.099	17.26	4.92706	6.15076	1.2237	1	0.29777	1.83151	0.364382
00000005_6.tif	1	5	1:5	10.807	16.792	4.92706	5.90885	0.981795	1	0.29777	1.75948	0.292349
00000005_6.tif	1	5	1:5	11.271	16.036	4.92706	5.02313	0.0960668	1	0.29777	1.49574	0.0286058
00000005_6.tif	1	5	1:5	13.062	14.844	4.92706	3.12128	-1.80578	0	0.29777	0.929423	-0.537707
00000005_6.tif	1	5	1:5	12.984	14.734	4.92706	3.04725	-1.87981	0	0.29777	0.90738	-0.55975
00000005_6.tif	1	5	1:5	13.089	14.646	4.92706	2.92655	-2.00051	0	0.29777	0.871439	-0.595692
00000005_6.tif	1	5	1:5	10.927	12.526	4.92706	3.2761	-1.65096	0	0.29777	0.975525	-0.491605
00000005_6.tif	1	5	1:5	12.026	12.052	4.92706	2.12429	-2.80276	0	0.29777	0.632551	-0.834579
00000005_6.tif	1	5	1:5	10.849	10.839	4.92706	3.46876	-1.4583	0	0.29777	1.03289	-0.434238
00000005_6.tif	1	5	1:5	11.786	11.286	4.92706	2.4429	-2.48416	0	0.29777	0.727422	-0.739708
00000005_6.tif	1	5	1:5	11.859	10.849	4.92706	2.52408	-2.40298	0	0.29777	0.751596	-0.715534
00000005_6.tif	1	5	1:5	12.885	11.823	4.92706	1.2645	-3.66256	0	0.29777	0.37653	-1.0906
00000005_6.tif	1	5	1:5	12.776	11.651	4.92706	1.39558	-3.53147	0	0.29777	0.415563	-1.05157
00000005_6.tif	1	5	1:5	12.661	11.266	4.92706	1.62143	-3.30563	0	0.29777	0.482812	-0.984318
00000005_6.tif	1	5	1:5	12.562	10.922	4.92706	1.87058	-3.05648	0	0.29777	0.557004	-0.910127
00000005_6.tif	1	5	1:5	13.797	11.625	4.92706	0.455044	-4.47201	0	0.29777	0.135498	-1.33163
00000005_6.tif	1	5	1:5	13.38	11.474	4.92706	0.884876	-4.04218	0	0.29777	0.263489	-1.20364
00000005_6.tif	1	5	1:5	13.312	11.161	4.92706	1.12565	-3.80141	0	0.29777	0.335185	-1.13194
00000005_6.tif	1	5	1:5	10.615	9.943	4.92706	4.04532	-0.881735	0	0.29777	1.20458	-0.262554
00000005_6.tif	1	5	1:5	11.297	10.031	4.92706	3.41669	-1.51036	0	0.29777	1.01739	-0.449741
00000005_6.tif	1	5	1:5	11.724	9.932	4.92706	3.1315	-1.79556	0	0.29777	0.932468	-0.534663
00000005_6.tif	1	5	1:5	10.781	8.292	4.92706	4.94609	0.0190361	1	0.29777	1.4728	0.00566839
00000005_6.tif	1	5	1:5	11.339	7.375	4.92706	5.33938	0.412325	1	0.29777	1.58991	0.122778
00000005_6.tif	1	5	1:5	11.646	7.339	4.92706	5.21614	0.289079	1	0.29777	1.55321	0.0860789
00000005_6.tif	1	5	1:5	11.661	7.161	4.92706	5.36608	0.439017	1	0.29777	1.59786	0.130726
00000005_6.tif	1	5	1:5	13.75	7.422	4.92706	4.51241	-0.414649	0	0.29777	1.34366	-0.12347
00000005_6.tif	1	5	1:5	14.292	8.797	4.92706	3.12341	-1.80364	0	0.29777	0.930059	-0.537071
00000005_6.tif	1	5	1:5	14.438	8.755	4.92706	3.17545	-1.7516	0	0.29777	0.945555	-0.521575
00000005_6.tif	1	5	1:5	14.224	6.87	4.92706	5.0476	0.120544	1	0.29777	1.50302	0.0358945
00000005_6.tif	1	5	1:5	13.568	6.568	4.92706	5.38014	0.45308	1	0.29777	1.60204	0.134914
00000005_6.tif	1	5	1:5	14.193	6.052	4.92706	5.86519	0.93813	1	0.29777	1.74648	0.279347
00000005_6.tif	1	5	1:5	14.516	5.974	4.92706	5.95451	1.02745	1	0.29777	1.77307	0.305943
00000005_6.tif	1	5	1:5	14.224	5.875	4.92706	6.0425	1.11545	1	0.29777	1.79928	0.332146
00000005_6.tif	1	5	1:5	14.271	5.729	4.92706	6.18926	1.2622	1	0.29777	1.84298	0.375847
00000005_6.tif	1	5	1:5	12.109	5.193	4.92706	7.02578	2.09872	1	0.29777	2.09207	0.624936
00000005_6.tif	1	5	1:5	12.135	5.047	4.92706	7.15828	2.23123	1	0.29777	2.13152	0.664392
00000005_6.tif	1	5	1:5	12.271	3.911	4.92706	8.22263	3.29557	1	0.29777	2.44845	0.981323
00000005_6.tif	1	5	1:5	12.406	3.911	4.92706	8.1929	3.26584	1	0.29777	2.4396	0.97247
00000005_6.tif	1	5	1:5	12.411	3.125	4.92706	8.96156	4.0345	1	0.29777	2.66848	1.20135
00000005_6.tif	1	5	1:5	12.26	3.104	4.92706	9.01254	4.08549	1	0.29777	2.68367	1.21654
00000005_6.tif	1	5	1:5	16.146	5.573	4.92706	6.65179	1.72473	1	0.29777	1.9807	0.513574
00000005_6.tif	1	5	1:5	16.427	5.88	4.92706	6.45355	1.52649	1	0.29777	1.92167	0.454544
00000005_6.tif	1	5	1:5	15.417	6.922	4.92706	5.15417	0.227111	1	0.29777	1.53476	0.067627
00000005_6.tif	1	5	1:5	15.438	6.818	4.92706	5.26014	0.333081	1	0.29777	1.56631	0.0991815
00000005_6.tif	1	5	1:5	15.552	6.875	4.92706	5.23437	0.307309	1	0.29777	1.55864	0.0915074
00000005_6.tif	1	5	1:5	15.672	6.948	4.92706	5.19804	0.270983	1	0.29777	1.54782	0.0806907
00000005_6.tif	1	5	1:5	15.286	9.432	4.92706	2.73401	-2.19305	0	0.29777	0.814107	-0.653023
00000005_6.tif	1	5	1:5	16.156	9.51	4.92706	3.13588	-1.79118	0	0.29777	0.933771	-0.533359
00000005_6.tif	1	5	1:5	16.156	9.688	4.92706	3.00142	-1.92564	0	0.29777	0.893734	-0.573396
00000005_6.tif	1	5	1:5	16.37	9.922	4.92706	2.98767	-1.93938	0	0.29777	0.88964	-0.57749
00000005_6.tif	1	5	1:5	16.432	9.714	4.92706	3.17474	-1.75231	0	0.29777	0.945344	-0.521786
00000005_6.tif	1	5	1:5	17.583	10.068	4.92706	3.90279	-1.02427	0	0.29777	1.16213	-0.304996
00000005_6.tif	1	5	1:5	17.906	10.255	4.92706	4.11094	-0.816116	0	0.29777	1.22412	-0.243015
00000005_6.tif	1	5	1:5	18.849	10.401	4.92706	4.9413	0.0142437	1	0.29777	1.47137	0.00424133
00000005_6.tif	1	5	1:5	18.776	10.276	4.92706	4.91221	-0.014851	0	0.29777	1.46271	-0.00442217
00000005_6.tif	1	5	1:5	18.901	10.281	4.92706	5.02857	0.101512	1	0.29777	1.49736	0.0302273
00000005_6.tif	1	5	1:5	18.88	10.188	4.92706	5.03986	0.112803	1	0.29777	1.50072	0.0335892
00000005_6.tif	1	5	1:5	17.458	10.474	4.92706	3.6127	-1.31436	0	0.29777	1.07575	-0.391377
00000005_6.tif	1	5	1:5	17.526	10.578	4.92706	3.63556	-1.29149	0	0.29777	1.08256	-0.384568
00000005_6.tif	1	5	1:5	17.583	10.484	4.92706	3.72377	-1.20329	0	0.29777	1.10883	-0.358303
00000005_6.tif	1	5	1:5	16.917	10.651	4.92706	3.04651	-1.88055	0	0.29777	0.907158	-0.559972
00000005_6.tif	1	5	1:5	16.75	11.073	4.92706	2.73736	-2.1897	0	0.29777	0.815104	-0.652026
00000005_6.tif	1	5	1:5	16.802	11.229	4.92706	2.74366	-2.1834	0	0.29777	0.81698	-0.65015
00000005_6.tif	1	5	1:5	14.839	12.734	4.92706	1.07133	-3.85573	0	0.29777	0.319009	-1.14812
00000005_6.tif	1	5	1:5	14.958	12.854	4.92706	1.23988	-3.68717	0	0.29777	0.3692	-1.09793
00000005_6.tif	1	5	1:5	15.661	12.698	4.92706	1.70446	-3.2226	0	0.29777	0.507537	-0.959593
00000005_6.tif	1	5	1:5	15.87	13.109	4.92706	2.09596	-2.8311	0	0.29777	0.624113	-0.843017
00000005_6.tif	1	5	1:5	15.953	13.057	4.92706	2.13655	-2.79051	0	0.29777	0.636201	-0.830929
00000005_6.tif	1	5	1:5	17.198	12.422	4.92706	3.0935	-1.83356	0	0.29777	0.921151	-0.545979
00000005_6.tif	1	5	1:5	17.594	12.01	4.92706	3.44925	-1.4778	0	0.29777	1.02708	-0.440046
00000005_6.tif	1	5	1:5	17.943	13.167	4.92706	3.99746	-0.929595	0	0.29777	1.19032	-0.276806
00000005_6.tif	1	5	1:5	18.057	13.161	4.92706	4.10408	-0.82298	0	0.29777	1.22207	-0.245059
00000005_6.tif	1	5	1:5	17.328	13.307	4.92706	3.47235	-1.45471	0	0.29777	1.03396	-0.433168
00000005_6.tif	1	5	1:5	17.458	13.599	4.92706	3.71463	-1.21243	0	0.29777	1.10611	-0.361025
00000005_6.tif	1	5	1:5	17.839	13.802	4.92706	4.14626	-0.780798	0	0.29777	1.23463	-0.232498
00000005_6.tif	1	5	1:5	18.01	14.24	4.92706	4.50853	-0.41853	0	0.29777	1.3425	-0.124626
00000005_6.tif	1	5	1:5	18.089	14.24	4.92706	4.57642	-0.350643	0	0.29777	1.36272	-0.104411
00000005_6.tif	1	5	1:5	18.161	14.464	4.92706	4.75473	-0.172331	0	0.29777	1.41582	-0.0513149
00000005_6.tif	1	5	1:5	17.771	14.552	4.92706	4.4815	-0.445557	0	0.29777	1.33446	-0.132674
00000005_6.tif	1	5	1:5	17.516	14.422	4.92706	4.19904	-0.72802	0	0.29777	1.25035	-0.216782
00000005_6.tif	1	5	1:5	17.078	15.073	4.92706	4.30778	-0.619279	0	0.29777	1.28273	-0.184403
00000005_6.tif	1	5	1:5	17.484	16.089	4.92706	5.34302	0.415958	1	0.29777	1.59099	0.12386
00000005_6.tif	1	5	1:5	19.198	16.161	4.92706	6.59805	1.67099	1	0.29777	1.9647	0.497571
00000005_6.tif	1	5	1:5	15.01	16.958	4.92706	5.11451	0.187448	1	0.29777	1.52295	0.0558165
00000005_6.tif	1	5	1:5	15.068	17.182	4.92706	5.34512	0.418062	1	0.29777	1.59162	0.124486
00000005_6.tif	1	5	1:5	15.807	17.891	4.92706	6.20061	1.27355	1	0.29777	1.84636	0.379226
00000005_6.tif	1	5	1:5	15.938	17.839	4.92706	6.18719	1.26013	1	0.29777	1.84236	0.37523
00000005_6.tif	1	5	1:5	17.734	17.068	4.92706	6.27746	1.3504	1	0.29777	1.86924	0.40211
00000005_6.tif	1	5	1:5	17.406	16.797	4.92706	5.86873	0.941672	1	0.29777	1.74753	0.280402
00000005_6.tif	1	5	1:5	17.74	16.536	4.92706	5.85252	0.925462	1	0.29777	1.74271	0.275575
00000005_6.tif	1	5	1:5	18.38	16.411	4.92706	6.17437	1.24731	1	0.29777	1.83854	0.371411
00000005_6.tif	1	5	1:5	18.807	17.026	4.92706	6.91569	1.98863	1	0.29777	2.05929	0.592156
00000005_6.tif	1	5	1:5	19.031	17.906	4.92706	7.72861	2.80155	1	0.29777	2.30135	0.834217
00000005_6.tif	1	5	1:5	19.005	18.057	4.92706	7.83004	2.90298	1	0.29777	2.33155	0.86442
00000005_6.tif	1	5	1:5	19.099	18.047	4.92706	7.88093	2.95387	1	0.29777	2.34671	0.879575
00000005_6.tif	1	5	1:5	15.182	18.943	4.92706	7.10197	2.17491	1	0.29777	2.11475	0.647623
00000005_6.tif	1	5	1:5	16.526	18.76	4.92706	7.24507	2.31801	1	0.29777	2.15736	0.690235
00000005_6.tif	1	5	1:5	16.583	18.901	4.92706	7.39697	2.46992	1	0.29777	2.2026	0.735467
00000005_6.tif	1	5	1:5	16.578	18.979	4.92706	7.46903	2.54198	1	0.29777	2.22405	0.756924
00000005_6.tif	1	5	1:5	16.516	19.224	4.92706	7.68174	2.75468	1	0.29777	2.28739	0.820262
00000005_6.tif	1	5	1:5	16.453	19.344	4.92706	7.77705	2.85	1	0.29777	2.31577	0.848643
00000005_6.tif	1	5	1:5	21.738	12.214	4.92706	7.59781	2.67075	1	0.29777	2.2624	0.795269
00000005_6.tif	1	5	1:5	22.321	11.762	4.92706	8.17647	3.24941	1	0.29777	2.43471	0.967577
00000005_6.tif	1	5	1:5	22.113	11.602	4.92706	7.97322	3.04617	1	0.29777	2.37419	0.907057
00000005_6.tif	1	5	1:5	21.509	10.377	4.92706	7.52232	2.59527	1	0.29777	2.23992	0.772792
00000005_6.tif	1	5	1:5	20.648	9.238	4.92706	7.03229	2.10523	1	0.29777	2.094	0.626874
00000005_6.tif	1	5	1:5	20.641	9.141	4.92706	7.06337	2.13631	1	0.29777	2.10326	0.63613
00000005_8.tif	2	4	2:4	5.844	6.969	4.99994	9.34657	4.34663	1	0.29777	2.78313	1.29429
00000005_8.tif	2	4	2:4	5.7	7.082	4.99994	9.4201	4.42016	1	0.29777	2.80502	1.31619
00000005_8.tif	2	4	2:4	4.637	7.936	4.99994	10.0428	5.04289	1	0.29777	2.99045	1.50162
00000005_8.tif	2	4	2:4	4.845	7.957	4.99994	9.84082	4.84088	1	0.29777	2.9303	1.44147
00000005_8.tif	2	4	2:4	5.332	8.457	4.99994	9.2125	4.21255	1	0.29777	2.74321	1.25437
00000005_8.tif	2	4	2:4	5.408	8.394	4.99994	9.16155	4.16161	1	0.29777	2.72804	1.2392
00000005_8.tif	2	4	2:4	4.991	10.019	4.99994	9.16468	4.16474	1	0.29777	2.72897	1.24013
00000005_8.tif	2	4	2:4	9.575	9.2	4.99994	5.00526	0.00532035	1	0.29777	1.49042	0.00158424
00000005_8.tif	2	4	2:4	9.54	9.297	4.99994	4.99379	-0.00615354	0	0.29777	1.487	-0.00183234
00000005_8.tif	2	4	2:4	9.248	10.234	4.99994	4.94779	-0.0521536	0	0.29777	1.4733	-0.0155298
00000005_8.tif	2	4	2:4	9.248	10.401	4.99994	4.90914	-0.0907992	0	0.29777	1.4618	-0.0270373
00000005_8.tif	2	4	2:4	8.554	11.536	4.99994	5.48855	0.488612	1	0.29777	1.63433	0.145494
00000005_8.tif	2	4	2:4	8.47	11.675	4.99994	5.57622	0.576282	1	0.29777	1.66043	0.171599
00000005_8.tif	2	4	2:4	5.714	14.78	4.99994	8.96612	3.96618	1	0.29777	2.66984	1.18101
00000005_8.tif	2	4	2:4	5.63	14.661	4.99994	9.00116	4.00122	1	0.29777	2.68028	1.19144
00000005_8.tif	2	4	2:4	4.589	13.252	4.99994	9.62173	4.62179	1	0.29777	2.86506	1.37623
00000005_8.tif	2	4	2:4	9.63	12.891	4.99994	4.63888	-0.361059	0	0.29777	1.38132	-0.107513
00000005_8.tif	2	4	2:4	9.589	12.578	4.99994	4.59169	-0.408253	0	0.29777	1.36727	-0.121566
00000005_8.tif	2	4	2:4	9.526	12.495	4.99994	4.63353	-0.36641	0	0.29777	1.37973	-0.109106
00000005_8.tif	2	4	2:4	5.901	15.686	4.99994	9.17343	4.17349	1	0.29777	2.73157	1.24274
00000005_8.tif	2	4	2:4	5.964	15.79	4.99994	9.16626	4.16632	1	0.29777	2.72944	1.2406
00000005_8.tif	2	4	2:4	6.137	17.505	4.99994	9.95265	4.95271	1	0.29777	2.9636	1.47477
00000005_8.tif	2	4	2:4	6.616	16.887	4.99994	9.19889	4.19894	1	0.29777	2.73915	1.25032
00000005_8.tif	2	4	2:4	7.318	17.075	4.99994	8.76144	3.7615	1	0.29777	2.60889	1.12006
00000005_8.tif	2	4	2:4	7.519	17.394	4.99994	8.81962	3.81967	1	0.29777	2.62622	1.13738
00000005_8.tif	2	4	2:4	7.415	17.762	4.99994	9.14645	4.14651	1	0.29777	2.72354	1.23471
00000005_8.tif	2	4	2:4	7.964	19.602	4.99994	10.162	5.16209	1	0.29777	3.02595	1.53711
00000005_8.tif	2	4	2:4	10.012	20.45	4.99994	9.85378	4.85384	1	0.29777	2.93416	1.44533
00000005_8.tif	2	4	2:4	13.97	21.054	4.99994	9.59627	4.59633	1	0.29777	2.85748	1.36865
00000005_8.tif	2	4	2:4	13.859	20.984	4.99994	9.52776	4.52782	1	0.29777	2.83708	1.34825
00000005_8.tif	2	4	2:4	15.089	20.137	4.99994	8.74192	3.74198	1	0.29777	2.60308	1.11425
00000005_8.tif	2	4	2:4	14.089	20.214	4.99994	8.75613	3.75618	1	0.29777	2.60731	1.11848
00000005_8.tif	2	4	2:4	14.019	20.068	4.99994	8.61003	3.61009	1	0.29777	2.56381	1.07498
00000005_8.tif	2	4	2:4	14.533	19.339	4.99994	7.89628	2.89634	1	0.29777	2.35128	0.862443
00000005_8.tif	2	4	2:4	13.095	20.241	4.99994	8.83391	3.83396	1	0.29777	2.63047	1.14164
00000005_8.tif	2	4	2:4	12.887	19.957	4.99994	8.57712	3.57718	1	0.29777	2.55401	1.06518
00000005_8.tif	2	4	2:4	12.783	19.825	4.99994	8.46119	3.46125	1	0.29777	2.51949	1.03066
00000005_8.tif	2	4	2:4	14.095	17.255	4.99994	5.79724	0.7973	1	0.29777	1.72624	0.237412
00000005_8.tif	2	4	2:4	14.651	15.325	4.99994	3.91466	-1.08528	0	0.29777	1.16567	-0.323164
00000005_8.tif	2	4	2:4	14.72	14.887	4.99994	3.49539	-1.50456	0	0.29777	1.04082	-0.448012
00000005_8.tif	2	4	2:4	11.561	16.401	4.99994	5.5307	0.530755	1	0.29777	1.64688	0.158043
00000005_8.tif	2	4	2:4	11.568	16.325	4.99994	5.4597	0.459762	1	0.29777	1.62574	0.136903
00000005_8.tif	2	4	2:4	10.366	15.009	4.99994	5.11103	0.111083	1	0.29777	1.52191	0.0330771
00000005_8.tif	2	4	2:4	12.616	14.599	4.99994	3.44954	-1.5504	0	0.29777	1.02717	-0.461662
00000005_8.tif	2	4	2:4	14.311	14.495	4.99994	3.04889	-1.95105	0	0.29777	0.907868	-0.580965
00000005_8.tif	2	4	2:4	13.366	13.884	4.99994	2.51842	-2.48152	0	0.29777	0.749911	-0.738922
00000005_8.tif	2	4	2:4	9.741	12.661	4.99994	4.46607	-0.533869	0	0.29777	1.32986	-0.15897
00000005_8.tif	2	4	2:4	9.811	12.536	4.99994	4.36617	-0.633772	0	0.29777	1.30011	-0.188718
00000005_8.tif	2	4	2:4	10.04	12.46	4.99994	4.12553	-0.874411	0	0.29777	1.22846	-0.260373
00000005_8.tif	2	4	2:4	10.012	11.793	4.99994	4.0439	-0.956042	0	0.29777	1.20415	-0.284681
00000005_8.tif	2	4	2:4	9.72	11.21	4.99994	4.32911	-0.670833	0	0.29777	1.28908	-0.199754
00000005_8.tif	2	4	2:4	10.512	13.266	4.99994	3.96608	-1.03387	0	0.29777	1.18098	-0.307854
00000005_8.tif	2	4	2:4	11.526	13.821	4.99994	3.45167	-1.54827	0	0.29777	1.0278	-0.461029
00000005_8.tif	2	4	2:4	11.443	13.648	4.99994	3.39866	-1.60128	0	0.29777	1.01202	-0.476813
00000005_8.tif	2	4	2:4	12.144	13.585	4.99994	2.85071	-2.14923	0	0.29777	0.848855	-0.639978
00000005_8.tif	2	4	2:4	12.075	13.266	4.99994	2.67169	-2.32825	0	0.29777	0.795551	-0.693282
00000005_8.tif	2	4	2:4	12.269	13.203	4.99994	2.48768	-2.51226	0	0.29777	0.740757	-0.748076
00000005_8.tif	2	4	2:4	11.339	12.946	4.99994	3.08551	-1.91444	0	0.29777	0.918771	-0.570061
00000005_8.tif	2	4	2:4	11.734	12.8	4.99994	2.6698	-2.33014	0	0.29777	0.794986	-0.693847
00000005_8.tif	2	4	2:4	11.936	12.724	4.99994	2.45723	-2.54271	0	0.29777	0.73169	-0.757143
00000005_8.tif	2	4	2:4	12.207	12.481	4.99994	2.10089	-2.89905	0	0.29777	0.625583	-0.86325
00000005_8.tif	2	4	2:4	14.894	13.53	4.99994	2.24033	-2.75961	0	0.29777	0.667104	-0.821729
00000005_8.tif	2	4	2:4	14.443	13.474	4.99994	2.05549	-2.94445	0	0.29777	0.612065	-0.876768
00000005_8.tif	2	4	2:4	14.179	13.106	4.99994	1.65368	-3.34626	0	0.29777	0.492418	-0.996415
00000005_8.tif	2	4	2:4	14.207	13.023	4.99994	1.57367	-3.42627	0	0.29777	0.468593	-1.02024
00000005_8.tif	2	4	2:4	14.818	12.502	4.99994	1.30081	-3.69913	0	0.29777	0.387343	-1.10149
00000005_8.tif	2	4	2:4	14.561	12.418	4.99994	1.09131	-3.90863	0	0.29777	0.32496	-1.16387
00000005_8.tif	2	4	2:4	13.109	12.398	4.99994	1.32442	-3.67552	0	0.29777	0.394373	-1.09446
00000005_8.tif	2	4	2:4	12.887	12.224	4.99994	1.38592	-3.61402	0	0.29777	0.412686	-1.07615
00000005_8.tif	2	4	2:4	12.457	11.842	4.99994	1.63085	-3.36909	0	0.29777	0.485619	-1.00321
00000005_8.tif	2	4	2:4	12.693	11.474	4.99994	1.34909	-3.65085	0	0.29777	0.40172	-1.08711
00000005_8.tif	2	4	2:4	12.686	11.405	4.99994	1.35704	-3.64291	0	0.29777	0.404084	-1.08475
00000005_8.tif	2	4	2:4	13.082	11.599	4.99994	0.970299	-4.02964	0	0.29777	0.288926	-1.19991
00000005_8.tif	2	4	2:4	10.387	10.186	4.99994	3.87001	-1.12993	0	0.29777	1.15237	-0.336459
00000005_8.tif	2	4	2:4	11.352	10.623	4.99994	2.81662	-2.18333	0	0.29777	0.838704	-0.650129
00000005_8.tif	2	4	2:4	12.79	10.002	4.99994	1.92027	-3.07967	0	0.29777	0.571799	-0.917034
00000005_8.tif	2	4	2:4	15.095	9.241	4.99994	2.45436	-2.54558	0	0.29777	0.730836	-0.757997
00000005_8.tif	2	4	2:4	12.075	8.741	4.99994	3.35428	-1.64566	0	0.29777	0.998803	-0.49003
00000005_8.tif	2	4	2:4	12.109	8.554	4.99994	3.48851	-1.51143	0	0.29777	1.03877	-0.450059
00000005_8.tif	2	4	2:4	11.165	8.255	4.99994	4.30538	-0.694557	0	0.29777	1.28201	-0.206818
00000005_8.tif	2	4	2:4	10.116	7.554	4.99994	5.53667	0.536726	1	0.29777	1.64865	0.159821
00000005_8.tif	2	4	2:4	10.186	7.311	4.99994	5.66272	0.662773	1	0.29777	1.68619	0.197354
00000005_8.tif	2	4	2:4	10.29	6.748	4.99994	6.02176	1.02182	1	0.29777	1.7931	0.304267
00000005_8.tif	2	4	2:4	10.839	6.672	4.99994	5.75891	0.758964	1	0.29777	1.71483	0.225997
00000005_8.tif	2	4	2:4	9.79	5.95	4.99994	6.95827	1.95833	1	0.29777	2.07197	0.583132
00000005_8.tif	2	4	2:4	13.832	8.144	4.99994	3.32065	-1.6793	0	0.29777	0.988789	-0.500044
00000005_8.tif	2	4	2:4	12.762	7.54	4.99994	4.12179	-0.878156	0	0.29777	1.22734	-0.261488
00000005_8.tif	2	4	2:4	12.554	6.797	4.99994	4.89276	-0.107186	0	0.29777	1.45692	-0.0319167
00000005_8.tif	2	4	2:4	12.741	5.748	4.99994	5.85634	0.856396	1	0.29777	1.74384	0.255009
00000005_8.tif	2	4	2:4	12.623	5.568	4.99994	6.05852	1.05858	1	0.29777	1.80405	0.315213
00000005_8.tif	2	4	2:4	11.755	5.498	4.99994	6.38373	1.38378	1	0.29777	1.90088	0.41205
00000005_8.tif	2	4	2:4	10.026	3.262	4.99994	9.12703	4.12709	1	0.29777	2.71776	1.22892
00000005_8.tif	2	4	2:4	10.102	3.109	4.99994	9.23198	4.23203	1	0.29777	2.74901	1.26017
00000005_8.tif	2	4	2:4	9.929	2.873	4.99994	9.5194	4.51946	1	0.29777	2.83459	1.34576
00000005_8.tif	2	4	2:4	9.79	2.734	4.99994	9.70503	4.70509	1	0.29777	2.88987	1.40104
00000005_8.tif	2	4	2:4	12.783	1.922	4.99994	9.61875	4.61881	1	0.29777	2.86418	1.37534
00000005_8.tif	2	4	2:4	13.033	2.04	4.99994	9.4719	4.47195	1	0.29777	2.82045	1.33161
00000005_8.tif	2	4	2:4	14.366	2.311	4.99994	9.15274	4.15279	1	0.29777	2.72541	1.23658
00000005_8.tif	2	4	2:4	14.359	2.241	4.99994	9.22245	4.22251	1	0.29777	2.74617	1.25734
00000005_8.tif	2	4	2:4	14.832	2.457	4.99994	9.0356	4.03566	1	0.29777	2.69053	1.2017
00000005_8.tif	2	4	2:4	16.04	2.488	4.99994	9.18983	4.18988	1	0.29777	2.73645	1.24762
00000005_8.tif	2	4	2:4	16.686	2.592	4.99994	9.25185	4.25191	1	0.29777	2.75492	1.26609
00000005_8.tif	2	4	2:4	19.109	2.856	4.99994	9.98343	4.98349	1	0.29777	2.97277	1.48393
00000005_8.tif	2	4	2:4	15.616	4.168	4.99994	7.45799	2.45805	1	0.29777	2.22076	0.731932
00000005_8.tif	2	4	2:4	18.345	5.661	4.99994	7.21949	2.21955	1	0.29777	2.14975	0.660914
00000005_8.tif	2	4	2:4	18.526	5.717	4.99994	7.2846	2.28465	1	0.29777	2.16913	0.680301
00000005_8.tif	2	4	2:4	15.297	10.227	4.99994	1.75795	-3.24199	0	0.29777	0.523465	-0.965368
00000005_8.tif	2	4	2:4	15.901	10.144	4.99994	2.27651	-2.72344	0	0.29777	0.677875	-0.810958
00000005_8.tif	2	4	2:4	16.054	9.318	4.99994	2.9373	-2.06264	0	0.29777	0.87464	-0.614192
00000005_8.tif	2	4	2:4	16.727	8.734	4.99994	3.82484	-1.1751	0	0.29777	1.13892	-0.34991
00000005_8.tif	2	4	2:4	16.894	10.464	4.99994	3.02025	-1.97969	0	0.29777	0.899341	-0.589491
00000005_8.tif	2	4	2:4	17.679	10.304	4.99994	3.81569	-1.18425	0	0.29777	1.1362	-0.352635
00000005_8.tif	2	4	2:4	17.873	10.241	4.99994	4.01966	-0.980284	0	0.29777	1.19693	-0.291899
00000005_8.tif	2	4	2:4	18.304	10.165	4.99994	4.45382	-0.546124	0	0.29777	1.32621	-0.162619
00000005_8.tif	2	4	2:4	17.304	11.158	4.99994	3.27577	-1.72418	0	0.29777	0.975425	-0.513408
00000005_8.tif	2	4	2:4	21.123	10.484	4.99994	7.14767	2.14773	1	0.29777	2.12836	0.63953
00000005_8.tif	2	4	2:4	20.977	12.207	4.99994	6.97533	1.97539	1	0.29777	2.07704	0.588211
00000005_8.tif	2	4	2:4	20.762	12.207	4.99994	6.76161	1.76167	1	0.29777	2.01341	0.524573
00000005_8.tif	2	4	2:4	15.2	11.988	4.99994	1.27352	-3.72642	0	0.29777	0.379217	-1.10962
00000005_8.tif	2	4	2:4	16.769	13.057	4.99994	3.16122	-1.83872	0	0.29777	0.941317	-0.547515
00000005_8.tif	2	4	2:4	17.109	13.37	4.99994	3.61417	-1.38577	0	0.29777	1.07619	-0.412641
00000005_8.tif	2	4	2:4	17.345	14.203	4.99994	4.29474	-0.705197	0	0.29777	1.27885	-0.209987
00000005_8.tif	2	4	2:4	17.422	14.21	4.99994	4.35866	-0.641284	0	0.29777	1.29788	-0.190955
00000005_8.tif	2	4	2:4	17.825	13.863	4.99994	4.48276	-0.517185	0	0.29777	1.33483	-0.154002
00000005_8.tif	2	4	2:4	17.915	14.231	4.99994	4.76337	-0.236576	0	0.29777	1.41839	-0.0704452
00000005_8.tif	2	4	2:4	20.484	14.863	4.99994	7.28652	2.28658	1	0.29777	2.16971	0.680875
00000005_8.tif	2	4	2:4	20.714	15.043	4.99994	7.57415	2.57421	1	0.29777	2.25536	0.766523
00000005_8.tif	2	4	2:4	20.936	14.918	4.99994	7.71355	2.71361	1	0.29777	2.29686	0.808031
00000005_8.tif	2	4	2:4	20.616	15.377	4.99994	7.6535	2.65356	1	0.29777	2.27898	0.790149
00000005_8.tif	2	4	2:4	20.061	15.911	4.99994	7.48716	2.48722	1	0.29777	2.22945	0.740619
00000005_8.tif	2	4	2:4	17.227	16.318	4.99994	5.81066	0.810723	1	0.29777	1.73024	0.241409
00000005_8.tif	2	4	2:4	17.38	16.415	4.99994	5.97613	0.976185	1	0.29777	1.77951	0.290679
00000005_8.tif	2	4	2:4	17.484	16.477	4.99994	6.08586	1.08592	1	0.29777	1.81219	0.323355
00000005_8.tif	2	4	2:4	17.547	16.658	4.99994	6.27097	1.27102	1	0.29777	1.86731	0.378473
00000005_8.tif	2	4	2:4	18.783	17.276	4.99994	7.50508	2.50514	1	0.29777	2.23479	0.745954
00000005_8.tif	2	4	2:4	15.318	19.818	4.99994	8.45682	3.45688	1	0.29777	2.51819	1.02935
00000005_8.tif	2	4	2:4	16.269	20.45	4.99994	9.26367	4.26373	1	0.29777	2.75844	1.26961
00000005_8.tif	2	4	2:4	17.727	20.387	4.99994	9.65952	4.65957	1	0.29777	2.87631	1.38748
00000005_8.tif	2	4	2:4	18.491	18.686	4.99994	8.4875	3.48755	1	0.29777	2.52732	1.03849
00000005_8.tif	2	4	2:4	22.293	17.075	4.99994	9.98147	4.98153	1	0.29777	2.97218	1.48335
00000005_8.tif	2	4	2:4	22.585	16.714	4.99994	10.0304	5.03043	1	0.29777	2.98674	1.49791
00000005_8.tif	2	4	2:4	22.224	16.734	4.99994	9.73557	4.73563	1	0.29777	2.89896	1.41013
00000005_8.tif	2	4	2:4	22.189	16.589	4.99994	9.62812	4.62818	1	0.29777	2.86697	1.37813
00000005_8.tif	2	4	2:4	22.12	16.457	4.99994	9.49969	4.49975	1	0.29777	2.82872	1.33989
00000005_8.tif	2	4	2:4	22.168	16.345	4.99994	9.48233	4.48239	1	0.29777	2.82355	1.33472
00000005_8.tif	2	4	2:4	22.37	16.387	4.99994	9.67733	4.67738	1	0.29777	2.88162	1.39278
00000005_8.tif	2	4	2:4	21.96	15.696	4.99994	8.98083	3.98089	1	0.29777	2.67422	1.18539
00000005_8.tif	2	4	2:4	21.592	15.266	4.99994	8.45597	3.45602	1	0.29777	2.51793	1.0291
00000005_8.tif	2	4	2:4	21.453	15.293	4.99994	8.34447	3.34453	1	0.29777	2.48473	0.995899
00000005_8.tif	2	4	2:4	22.411	13.745	4.99994	8.67586	3.67592	1	0.29777	2.58341	1.09458
00000005_8.tif	2	4	2:4	23.648	13.405	4.99994	9.80133	4.80139	1	0.29777	2.91854	1.42971
00000005_8.tif	2	4	2:4	23.335	11.516	4.99994	9.29318	4.29324	1	0.29777	2.76723	1.2784
00000005_8.tif	2	4	2:4	21.266	10.634	4.99994	7.27084	2.2709	1	0.29777	2.16504	0.676206
00000005_8.tif	2	4	2:4	23.564	8.356	4.99994	10.0145	5.01459	1	0.29777	2.98203	1.49319
0000005_11.tif	3	3	3:3	8.229	3.24	4.25524	9.96904	5.7138	1	0.29777	2.96848	1.7014
0000005_11.tif	3	3	3:3	8.38	3.123	4.25524	9.93826	5.68302	1	0.29777	2.95931	1.69223
0000005_11.tif	3	3	3:3	10.214	4.911	4.25524	7.37722	3.12199	1	0.29777	2.19672	0.929634
0000005_11.tif	3	3	3:3	10.311	4.766	4.25524	7.40787	3.15263	1	0.29777	2.20584	0.938758
0000005_11.tif	3	3	3:3	6.464	6.474	4.25524	9.76963	5.51439	1	0.29777	2.9091	1.64202
0000005_11.tif	3	3	3:3	6.498	6.613	4.25524	9.68894	5.4337	1	0.29777	2.88507	1.61799
0000005_11.tif	3	3	3:3	9.991	6.432	4.25524	6.61911	2.36387	1	0.29777	1.97097	0.70389
0000005_11.tif	3	3	3:3	9.915	6.474	4.25524	6.66141	2.40617	1	0.29777	1.98357	0.716485
0000005_11.tif	3	3	3:3	9.915	7.595	4.25524	6.14869	1.89346	1	0.29777	1.8309	0.563814
0000005_11.tif	3	3	3:3	9.811	7.818	4.25524	6.16365	1.90841	1	0.29777	1.83535	0.568268
0000005_11.tif	3	3	3:3	10.38	8.457	4.25524	5.42261	1.16737	1	0.29777	1.61469	0.347609
0000005_11.tif	3	3	3:3	10.193	9.366	4.25524	5.42903	1.1738	1	0.29777	1.6166	0.349521
0000005_11.tif	3	3	3:3	10.054	9.464	4.25524	5.55754	1.3023	1	0.29777	1.65487	0.387786
0000005_11.tif	3	3	3:3	9.345	9.526	4.25524	6.25934	2.0041	1	0.29777	1.86384	0.596762
0000005_11.tif	3	3	3:3	7.144	8.783	4.25524	8.52718	4.27194	1	0.29777	2.53914	1.27206
0000005_11.tif	3	3	3:3	10.102	11.422	4.25524	5.67741	1.42217	1	0.29777	1.69056	0.423479
0000005_11.tif	3	3	3:3	10.248	11.373	4.25524	5.52373	1.26849	1	0.29777	1.6448	0.377718
0000005_11.tif	3	3	3:3	10.443	13.845	4.25524	6.44542	2.19018	1	0.29777	1.91925	0.652171
0000005_11.tif	3	3	3:3	10.054	15.168	4.25524	7.59723	3.34199	1	0.29777	2.26223	0.995143
0000005_11.tif	3	3	3:3	10.123	15.571	4.25524	7.83043	3.57519	1	0.29777	2.33167	1.06458
0000005_11.tif	3	3	3:3	10.2	15.703	4.25524	7.87258	3.61734	1	0.29777	2.34422	1.07713
0000005_11.tif	3	3	3:3	7.248	15.821	4.25524	10.192	5.93675	1	0.29777	3.03487	1.76779
0000005_11.tif	3	3	3:3	7.116	15.911	4.25524	10.3517	6.0965	1	0.29777	3.08244	1.81536
0000005_11.tif	3	3	3:3	8.241	17.214	4.25524	10.3226	6.06734	1	0.29777	3.07375	1.80667
0000005_11.tif	3	3	3:3	7.873	17.88	4.25524	11.0544	6.79916	1	0.29777	3.29167	2.02459
0000005_11.tif	3	3	3:3	7.88	17.783	4.25524	10.9802	6.72499	1	0.29777	3.26958	2.0025
0000005_11.tif	3	3	3:3	8.318	18.429	4.25524	11.159	6.90378	1	0.29777	3.32282	2.05574
0000005_11.tif	3	3	3:3	8.325	18.193	4.25524	10.9764	6.7212	1	0.29777	3.26845	2.00137
0000005_11.tif	3	3	3:3	12.238	19.97	4.25524	10.5522	6.29698	1	0.29777	3.14213	1.87505
0000005_11.tif	3	3	3:3	14.53	18.658	4.25524	8.75826	4.50302	1	0.29777	2.60795	1.34086
0000005_11.tif	3	3	3:3	14.46	18.505	4.25524	8.6153	4.36006	1	0.29777	2.56538	1.29829
0000005_11.tif	3	3	3:3	11.064	17.533	4.25524	8.81847	4.56323	1	0.29777	2.62588	1.35879
0000005_11.tif	3	3	3:3	10.946	17.401	4.25524	8.76735	4.51211	1	0.29777	2.61065	1.34357
0000005_11.tif	3	3	3:3	11.12	17.38	4.25524	8.65847	4.40323	1	0.29777	2.57823	1.31115
0000005_11.tif	3	3	3:3	11.009	17.29	4.25524	8.63983	4.38459	1	0.29777	2.57268	1.3056
0000005_11.tif	3	3	3:3	11.043	15.79	4.25524	7.38975	3.13451	1	0.29777	2.20045	0.933363
0000005_11.tif	3	3	3:3	13.03	17.422	4.25524	7.88481	3.62957	1	0.29777	2.34786	1.08078
0000005_11.tif	3	3	3:3	12.967	17.269	4.25524	7.76131	3.50607	1	0.29777	2.31108	1.044
0000005_11.tif	3	3	3:3	14.002	17.158	4.25524	7.36697	3.11173	1	0.29777	2.19366	0.926579
0000005_11.tif	3	3	3:3	15.002	16.012	4.25524	6.07642	1.82118	1	0.29777	1.80938	0.542293
0000005_11.tif	3	3	3:3	14.911	15.804	4.25524	5.87922	1.62399	1	0.29777	1.75066	0.483574
0000005_11.tif	3	3	3:3	14.849	13.835	4.25524	3.9411	-0.314142	0	0.29777	1.17354	-0.0935422
0000005_11.tif	3	3	3:3	12.96	12.821	4.25524	3.88254	-0.372702	0	0.29777	1.1561	-0.11098
0000005_11.tif	3	3	3:3	13.148	12.564	4.25524	3.5663	-0.688941	0	0.29777	1.06194	-0.205146
0000005_11.tif	3	3	3:3	11.161	11.568	4.25524	4.70956	0.454326	1	0.29777	1.40237	0.135285
0000005_11.tif	3	3	3:3	11.085	11.436	4.25524	4.73844	0.4832	1	0.29777	1.41096	0.143882
0000005_11.tif	3	3	3:3	11.585	9.63	4.25524	4.01791	-0.237332	0	0.29777	1.19641	-0.0706705
0000005_11.tif	3	3	3:3	12.141	9.595	4.25524	3.46769	-0.78755	0	0.29777	1.03257	-0.234509
0000005_11.tif	3	3	3:3	13.661	10.102	4.25524	1.93293	-2.32231	0	0.29777	0.575569	-0.691513
0000005_11.tif	3	3	3:3	14.064	9.582	4.25524	1.57212	-2.68312	0	0.29777	0.468129	-0.798953
0000005_11.tif	3	3	3:3	14.099	9.47	4.25524	1.56976	-2.68548	0	0.29777	0.467426	-0.799656
0000005_11.tif	3	3	3:3	10.842	8.068	4.25524	5.11164	0.856397	1	0.29777	1.52209	0.255009
0000005_11.tif	3	3	3:3	10.946	8.095	4.25524	5.00506	0.74982	1	0.29777	1.49036	0.223274
0000005_11.tif	3	3	3:3	13.516	8.352	4.25524	2.626	-1.62924	0	0.29777	0.781944	-0.485139
0000005_11.tif	3	3	3:3	14.564	7.321	4.25524	2.8348	-1.42044	0	0.29777	0.844118	-0.422965
0000005_11.tif	3	3	3:3	14.481	6.946	4.25524	3.21496	-1.04028	0	0.29777	0.95732	-0.309763
0000005_11.tif	3	3	3:3	14.939	7.043	4.25524	2.99245	-1.26279	0	0.29777	0.891061	-0.376021
0000005_11.tif	3	3	3:3	17.172	0.995	4.25524	9.10763	4.85239	1	0.29777	2.71198	1.4449
0000005_11.tif	3	3	3:3	17.339	0.995	4.25524	9.13813	4.88289	1	0.29777	2.72106	1.45398
0000005_11.tif	3	3	3:3	18.283	1.953	4.25524	8.45185	4.19661	1	0.29777	2.51671	1.24962
0000005_11.tif	3	3	3:3	20.019	3.349	4.25524	7.96135	3.70611	1	0.29777	2.37065	1.10357
0000005_11.tif	3	3	3:3	20.179	3.259	4.25524	8.12558	3.87035	1	0.29777	2.41956	1.15247
0000005_11.tif	3	3	3:3	17.832	4.095	4.25524	6.28301	2.02777	1	0.29777	1.87089	0.603809
0000005_11.tif	3	3	3:3	17.977	4.193	4.25524	6.24556	1.99032	1	0.29777	1.85974	0.592657
0000005_11.tif	3	3	3:3	20.686	5.644	4.25524	6.68145	2.42621	1	0.29777	1.98954	0.722454
0000005_11.tif	3	3	3:3	15.686	6.505	4.25524	3.46036	-0.794879	0	0.29777	1.03039	-0.236691
0000005_11.tif	3	3	3:3	15.825	6.63	4.25524	3.34234	-0.912897	0	0.29777	0.995249	-0.271833
0000005_11.tif	3	3	3:3	18.595	7.311	4.25524	4.00929	-0.245944	0	0.29777	1.19385	-0.0732348
0000005_11.tif	3	3	3:3	18.776	7.345	4.25524	4.12506	-0.130178	0	0.29777	1.22832	-0.038763
0000005_11.tif	3	3	3:3	18.811	7.415	4.25524	4.10837	-0.146871	0	0.29777	1.22335	-0.0437338
0000005_11.tif	3	3	3:3	17.297	8.019	4.25524	2.58849	-1.66675	0	0.29777	0.770775	-0.496307
0000005_11.tif	3	3	3:3	18.116	7.984	4.25524	3.21032	-1.04492	0	0.29777	0.955936	-0.311147
0000005_11.tif	3	3	3:3	18.311	8.068	4.25524	3.31724	-0.937996	0	0.29777	0.987775	-0.279307
0000005_11.tif	3	3	3:3	19.061	8.332	4.25524	3.83643	-0.418807	0	0.29777	1.14237	-0.124708
0000005_11.tif	3	3	3:3	15.498	9.491	4.25524	0.481674	-3.77356	0	0.29777	0.143428	-1.12365
0000005_11.tif	3	3	3:3	15.783	9.88	4.25524	0.211405	-4.04383	0	0.29777	0.06295	-1.20413
0000005_11.tif	3	3	3:3	17.033	12.495	4.25524	2.91395	-1.34129	0	0.29777	0.867687	-0.399396
0000005_11.tif	3	3	3:3	16.554	13.259	4.25524	3.4334	-0.821837	0	0.29777	1.02236	-0.244718
0000005_11.tif	3	3	3:3	17.63	13.05	4.25524	3.69988	-0.555364	0	0.29777	1.10171	-0.165371
0000005_11.tif	3	3	3:3	17.714	13.064	4.25524	3.75841	-0.496832	0	0.29777	1.11914	-0.147942
0000005_11.tif	3	3	3:3	18.526	13.474	4.25524	4.57669	0.321449	1	0.29777	1.3628	0.0957178
0000005_11.tif	3	3	3:3	18.707	13.571	4.25524	4.76785	0.512609	1	0.29777	1.41972	0.15264
0000005_11.tif	3	3	3:3	18.825	13.988	4.25524	5.16375	0.908507	1	0.29777	1.53761	0.270526
0000005_11.tif	3	3	3:3	18.762	14.224	4.25524	5.31183	1.05659	1	0.29777	1.5817	0.314621
0000005_11.tif	3	3	3:3	18.845	14.405	4.25524	5.50672	1.25149	1	0.29777	1.63974	0.372655
0000005_11.tif	3	3	3:3	17.804	16.595	4.25524	6.99116	2.73593	1	0.29777	2.08176	0.814677
0000005_11.tif	3	3	3:3	17.929	16.762	4.25524	7.18946	2.93423	1	0.29777	2.14081	0.873724
0000005_11.tif	3	3	3:3	17.609	17.665	4.25524	7.96152	3.70628	1	0.29777	2.3707	1.10362
0000005_11.tif	3	3	3:3	19.373	18.71	4.25524	9.52949	5.27425	1	0.29777	2.8376	1.57051
0000005_11.tif	3	3	3:3	19.019	19.023	4.25524	9.68661	5.43137	1	0.29777	2.88438	1.6173
0000005_11.tif	3	3	3:3	18.783	18.953	4.25524	9.53959	5.28435	1	0.29777	2.8406	1.57352
0000005_11.tif	3	3	3:3	16.693	20.168	4.25524	10.2635	6.00831	1	0.29777	3.05618	1.78909
0000005_11.tif	3	3	3:3	15.345	19.363	4.25524	9.40217	5.14693	1	0.29777	2.79968	1.5326
0000005_11.tif	3	3	3:3	15.484	19.405	4.25524	9.44158	5.18634	1	0.29777	2.81142	1.54434
0000005_11.tif	3	3	3:3	20.964	18.057	4.25524	9.71531	5.46007	1	0.29777	2.89293	1.62585
0000005_11.tif	3	3	3:3	21.099	17.974	4.25524	9.72215	5.46691	1	0.29777	2.89496	1.62788
0000005_11.tif	3	3	3:3	21.276	14.661	4.25524	7.37589	3.12065	1	0.29777	2.19632	0.929237
0000005_11.tif	3	3	3:3	23.283	15.023	4.25524	9.20821	4.95297	1	0.29777	2.74193	1.47485
0000005_11.tif	3	3	3:3	23.255	14.877	4.25524	9.10523	4.84999	1	0.29777	2.71126	1.44418
0000005_11.tif	3	3	3:3	24.283	14.026	4.25524	9.59612	5.34088	1	0.29777	2.85744	1.59035
0000005_11.tif	3	3	3:3	24.276	13.894	4.25524	9.53461	5.27938	1	0.29777	2.83912	1.57204
0000005_11.tif	3	3	3:3	21.505	8.328	4.25524	6.13804	1.8828	1	0.29777	1.82772	0.560642
0000005_11.tif	3	3	3:3	21.63	8.3	4.25524	6.26599	2.01075	1	0.29777	1.86582	0.59874
0000005_11.tif	3	3	3:3	22.429	8.099	4.25524	7.0897	2.83446	1	0.29777	2.1111	0.844017
0000005_15.tif	4	2	4:2	6.135	7.146	3.35444	8.58399	5.22956	1	0.29777	2.55606	1.5572
0000005_15.tif	4	2	4:2	9.905	2.755	3.35444	9.76075	6.40631	1	0.29777	2.90646	1.90761
0000005_15.tif	4	2	4:2	9.967	2.644	3.35444	9.84403	6.48959	1	0.29777	2.93126	1.93241
0000005_15.tif	4	2	4:2	6.078	9.332	3.35444	7.64339	4.28896	1	0.29777	2.27597	1.27712
0000005_15.tif	4	2	4:2	6.196	9.526	3.35444	7.4681	4.11366	1	0.29777	2.22378	1.22492
0000005_15.tif	4	2	4:2	6.411	13.738	3.35444	7.09758	3.74314	1	0.29777	2.11345	1.1146
0000005_15.tif	4	2	4:2	6.467	13.849	3.35444	7.07298	3.71854	1	0.29777	2.10612	1.10727
0000005_15.tif	4	2	4:2	5.814	16.984	3.35444	9.01562	5.66118	1	0.29777	2.68458	1.68573
0000005_15.tif	4	2	4:2	6.002	16.929	3.35444	8.82941	5.47497	1	0.29777	2.62913	1.63028
0000005_15.tif	4	2	4:2	9.821	18.655	3.35444	7.56988	4.21545	1	0.29777	2.25408	1.25523
0000005_15.tif	4	2	4:2	9.974	18.488	3.35444	7.35175	3.99731	1	0.29777	2.18913	1.19028
0000005_15.tif	4	2	4:2	10.071	17.87	3.35444	6.75857	3.40413	1	0.29777	2.0125	1.01365
0000005_15.tif	4	2	4:2	9.786	17.168	3.35444	6.30224	2.9478	1	0.29777	1.87662	0.877767
0000005_15.tif	4	2	4:2	13.252	21.089	3.35444	9.17202	5.81758	1	0.29777	2.73115	1.7323
0000005_15.tif	4	2	4:2	13.523	20.54	3.35444	8.62668	5.27224	1	0.29777	2.56877	1.56992
0000005_15.tif	4	2	4:2	10.425	19.109	3.35444	7.73464	4.3802	1	0.29777	2.30314	1.30429
0000005_15.tif	4	2	4:2	10.793	16.155	3.35444	4.90929	1.55485	1	0.29777	1.46184	0.462988
0000005_15.tif	4	2	4:2	10.918	15.877	3.35444	4.60632	1.25188	1	0.29777	1.37162	0.372774
0000005_15.tif	4	2	4:2	10.634	14.967	3.35444	4.03191	0.677468	1	0.29777	1.20058	0.20173
0000005_15.tif	4	2	4:2	10.55	14.932	3.35444	4.06129	0.706851	1	0.29777	1.20933	0.210479
0000005_15.tif	4	2	4:2	14.967	13.55	3.35444	2.35438	-1.00006	0	0.29777	0.701064	-0.297787
0000005_15.tif	4	2	4:2	13.891	13.043	3.35444	1.28541	-2.06903	0	0.29777	0.382756	-0.616095
0000005_15.tif	4	2	4:2	14.668	12.009	3.35444	1.40003	-1.95441	0	0.29777	0.416886	-0.581965
0000005_15.tif	4	2	4:2	11.488	12.071	3.35444	1.78964	-1.5648	0	0.29777	0.532901	-0.46595
0000005_15.tif	4	2	4:2	12.314	12.064	3.35444	0.968224	-2.38621	0	0.29777	0.288308	-0.710543
0000005_15.tif	4	2	4:2	12.307	11.953	3.35444	0.964672	-2.38977	0	0.29777	0.28725	-0.711601
0000005_15.tif	4	2	4:2	12.141	11.814	3.35444	1.13468	-2.21975	0	0.29777	0.337875	-0.660976
0000005_15.tif	4	2	4:2	11.641	10.457	3.35444	2.18826	-1.16617	0	0.29777	0.651599	-0.347252
0000005_15.tif	4	2	4:2	11.689	10.332	3.35444	2.23941	-1.11503	0	0.29777	0.666829	-0.332022
0000005_15.tif	4	2	4:2	13.474	11.061	3.35444	0.879741	-2.4747	0	0.29777	0.261961	-0.73689
[truncated: 3,782 more rows]
