# Supplementary material for: Dopamine signaling regulates predator-driven changes in Caenorhabditis elegans’ egg laying behavior
Source: eLife. 2023 Jul 11;12:e83957. doi: 10.7554/eLife.83957 (PMC10335835; doi:10.7554/eLife.83957)
Supplement: Figure 1—figure supplement 6—source data 1. — For each test arena, data tabulate the arena, condition, <x,y> coordinates in pixels, lawn radius in pixels, the egg distance from arena center in pixels, the egg distance from lawn edge in pixels, position as 1 (off) or 0 (on) lawn, the conversion factor for pixel data in mm-per-pixel, the calculated distance from center in mm, the calculated distance from the lawn edge in mm. [file elife-83957-fig1-figsupp6-data1.xlsx]

## Sheet: Figure1-S3
Arena	Condition	X	Y	LawnRadius	DistCenterPx	DistEdgePx	off	PxScale	DistCenterMm	DistEdgeMm
00000000_2.tif	control	6.094	13.083	5.23445	8.63651	3.40206	1	0.29777	2.57169	1.01303
00000000_2.tif	control	7.8	10.273	5.23445	6.90366	1.66921	1	0.29777	2.0557	0.497041
00000000_2.tif	control	8.627	9.745	5.23445	6.22233	0.98788	1	0.29777	1.85282	0.294161
00000000_2.tif	control	14.266	2.839	5.23445	8.693	3.45855	1	0.29777	2.58852	1.02985
00000000_2.tif	control	13.453	4.786	5.23445	6.83506	1.60061	1	0.29777	2.03528	0.476614
00000000_2.tif	control	10.106	9.075	5.23445	5.10927	-0.125176	0	0.29777	1.52139	-0.0372737
00000000_2.tif	control	10.161	9.207	5.23445	4.99849	-0.235957	0	0.29777	1.4884	-0.0702609
00000000_2.tif	control	11.53	10.554	5.23445	3.20971	-2.02474	0	0.29777	0.955757	-0.602906
00000000_2.tif	control	12.231	10.477	5.23445	2.58081	-2.65364	0	0.29777	0.768487	-0.790176
00000000_2.tif	control	11.05	17.391	5.23445	6.85002	1.61557	1	0.29777	2.03973	0.481067
00000000_2.tif	control	11.12	17.606	5.23445	7.00003	1.76557	1	0.29777	2.0844	0.525735
00000000_2.tif	control	12.071	18.974	5.23445	7.86213	2.62768	1	0.29777	2.34111	0.782443
00000000_2.tif	control	11.925	19.939	5.23445	8.82471	3.59026	1	0.29777	2.62773	1.06907
00000000_2.tif	control	12.766	20.661	5.23445	9.31513	4.08067	1	0.29777	2.77376	1.2151
00000000_2.tif	control	13.061	20.55	5.23445	9.15245	3.918	1	0.29777	2.72533	1.16666
00000000_2.tif	control	14.845	18.599	5.23445	7.07763	1.84318	1	0.29777	2.10751	0.548844
00000000_2.tif	control	15.102	17.474	5.23445	5.97008	0.73563	1	0.29777	1.77771	0.219049
00000000_2.tif	control	17.505	17.432	5.23445	6.58664	1.35219	1	0.29777	1.96131	0.402643
00000000_2.tif	control	17.804	17.405	5.23445	6.70066	1.46621	1	0.29777	1.99526	0.436594
00000000_2.tif	control	17.95	17.266	5.23445	6.65161	1.41716	1	0.29777	1.98065	0.421988
00000000_2.tif	control	15.825	15.245	5.23445	3.91901	-1.31544	0	0.29777	1.16696	-0.391698
00000000_2.tif	control	15.283	12.259	5.23445	1.00942	-4.22503	0	0.29777	0.300574	-1.25809
00000000_2.tif	control	16.193	11.033	5.23445	1.67805	-3.5564	0	0.29777	0.499674	-1.05899
00000000_2.tif	control	15.616	10.755	5.23445	1.2842	-3.95025	0	0.29777	0.382396	-1.17627
00000000_2.tif	control	17.825	10.63	5.23445	3.35775	-1.8767	0	0.29777	0.999838	-0.558824
00000000_2.tif	control	16.714	9.96	5.23445	2.63969	-2.59476	0	0.29777	0.786021	-0.772641
00000000_2.tif	control	17.2	9.217	5.23445	3.48551	-1.74894	0	0.29777	1.03788	-0.520781
00000000_2.tif	control	17.04	9.064	5.23445	3.47402	-1.76043	0	0.29777	1.03446	-0.524202
00000000_2.tif	control	15.922	9.405	5.23445	2.5051	-2.72935	0	0.29777	0.745944	-0.812719
00000000_2.tif	control	15.727	9.057	5.23445	2.71864	-2.51581	0	0.29777	0.80953	-0.749133
00000000_2.tif	control	15.248	6.172	5.23445	5.3944	0.159953	1	0.29777	1.60629	0.0476292
00000000_2.tif	control	15.269	6.061	5.23445	5.50714	0.272692	1	0.29777	1.63986	0.0811995
00000000_2.tif	control	19.297	3.345	5.23445	9.43896	4.20451	1	0.29777	2.81064	1.25198
00000000_2.tif	control	18.422	10.227	5.23445	4.04713	-1.18732	0	0.29777	1.20511	-0.353548
00000000_2.tif	control	18.491	10.186	5.23445	4.12568	-1.10877	0	0.29777	1.2285	-0.33016
00000000_2.tif	control	20.595	11.832	5.23445	6.01379	0.779339	1	0.29777	1.79073	0.232064
00000000_2.tif	control	19.401	18.328	5.23445	8.33202	3.09757	1	0.29777	2.48103	0.922363
00000000_2.tif	control	21.911	6.672	5.23445	8.78482	3.55037	1	0.29777	2.61585	1.05719
00000000_2.tif	control	22.099	6.568	5.23445	8.99899	3.76454	1	0.29777	2.67963	1.12097
00000001_5.tif	predator	15.031	11.021	5.57293	0.701231	-4.87169	0	0.29777	0.208806	-1.45064
00000001_5.tif	predator	15.089	10.87	5.57293	0.847232	-4.72569	0	0.29777	0.25228	-1.40717
00000001_5.tif	predator	14.12	10.536	5.57293	1.01669	-4.55624	0	0.29777	0.302738	-1.35671
00000001_5.tif	predator	13.849	9.911	5.57293	1.69777	-3.87515	0	0.29777	0.505545	-1.1539
00000001_5.tif	predator	11.776	6.911	5.57293	5.31853	-0.254392	0	0.29777	1.5837	-0.0757502
00000001_5.tif	predator	11.964	6.828	5.57293	5.29746	-0.275464	0	0.29777	1.57743	-0.0820249
00000001_5.tif	predator	12.45	6.411	5.57293	5.46691	-0.106013	0	0.29777	1.62788	-0.0315676
00000001_5.tif	predator	15.036	7.269	5.57293	4.24398	-1.32894	0	0.29777	1.26373	-0.395719
00000001_5.tif	predator	15.12	7.186	5.57293	4.33754	-1.23539	0	0.29777	1.29159	-0.367861
00000001_5.tif	predator	17.585	20.391	5.57293	9.43085	3.85793	1	0.29777	2.80822	1.14877
00000001_5.tif	predator	18.585	12.255	5.57293	4.15805	-1.41487	0	0.29777	1.23814	-0.421307
00000001_5.tif	predator	16.939	11.155	5.57293	2.46043	-3.1125	0	0.29777	0.732641	-0.926809
00000001_5.tif	predator	17.036	11.231	5.57293	2.5481	-3.02483	0	0.29777	0.758747	-0.900703
00000001_5.tif	predator	17.641	11.127	5.57293	3.16066	-2.41226	0	0.29777	0.94115	-0.7183
00000001_5.tif	predator	17.606	11.043	5.57293	3.13645	-2.43647	0	0.29777	0.933941	-0.725509
00000001_5.tif	predator	18.259	10.502	5.57293	3.88389	-1.68903	0	0.29777	1.15651	-0.502944
00000001_5.tif	predator	18.113	10.411	5.57293	3.76754	-1.80538	0	0.29777	1.12186	-0.537588
00000001_5.tif	predator	18.634	10.405	5.57293	4.27123	-1.30169	0	0.29777	1.27185	-0.387605
00000001_5.tif	predator	17.106	9.193	5.57293	3.46656	-2.10637	0	0.29777	1.03224	-0.627213
00000001_5.tif	predator	17.314	9.137	5.57293	3.66109	-1.91184	0	0.29777	1.09016	-0.569288
00000001_5.tif	predator	16.356	7.696	5.57293	4.21377	-1.35916	0	0.29777	1.25473	-0.404717
00000001_5.tif	predator	15.821	7.502	5.57293	4.19065	-1.38227	0	0.29777	1.24785	-0.411599
00000001_5.tif	predator	15.87	7.446	5.57293	4.25934	-1.31358	0	0.29777	1.2683	-0.391146
00000001_5.tif	predator	17.092	7.405	5.57293	4.82866	-0.744267	0	0.29777	1.43783	-0.22162
00000001_5.tif	predator	15.877	6.13	5.57293	5.5234	-0.0495268	0	0.29777	1.6447	-0.0147476
00000001_5.tif	predator	15.738	6.005	5.57293	5.61225	0.0393221	1	0.29777	1.67116	0.0117089
00000001_5.tif	predator	18.925	11.189	5.57293	4.43449	-1.13843	0	0.29777	1.32046	-0.338991
00000001_5.tif	predator	18.946	10.481	5.57293	4.55663	-1.01629	0	0.29777	1.35683	-0.302621
00000001_5.tif	predator	19.016	11.53	5.57293	4.51629	-1.05664	0	0.29777	1.34482	-0.314635
00000001_5.tif	predator	19.689	13.543	5.57293	5.58443	0.0115011	1	0.29777	1.66287	0.00342467
00000001_5.tif	predator	19.814	13.189	5.57293	5.58236	0.00943055	1	0.29777	1.66226	0.00280813
00000001_5.tif	predator	20.05	12.849	5.57293	5.71659	0.143665	1	0.29777	1.70223	0.042779
00000001_5.tif	predator	20.391	12.752	5.57293	6.02697	0.454048	1	0.29777	1.79465	0.135202
00000001_5.tif	predator	20.717	18.186	5.57293	9.14521	3.57229	1	0.29777	2.72317	1.06372
00000001_5.tif	predator	21.05	18.783	5.57293	9.81076	4.23783	1	0.29777	2.92135	1.2619
00000001_5.tif	predator	21.127	18.72	5.57293	9.81576	4.24284	1	0.29777	2.92284	1.26339
00000001_5.tif	predator	21.314	18.894	5.57293	10.0704	4.49747	1	0.29777	2.99866	1.33921
00000001_5.tif	predator	22.585	12.137	5.57293	8.11173	2.53881	1	0.29777	2.41543	0.75598
00000001_5.tif	predator	24.245	11.13	5.57293	9.75125	4.17832	1	0.29777	2.90363	1.24418
00000001_5.tif	predator	23.891	9.248	5.57293	9.65237	4.07944	1	0.29777	2.87419	1.21474
00000003_3.tif	control	6.562	11.646	5.65114	6.50602	0.854879	1	0.29777	1.9373	0.254557
00000003_3.tif	control	7.908	11.474	5.65114	5.16236	-0.488783	0	0.29777	1.5372	-0.145545
00000003_3.tif	control	7.977	11.328	5.65114	5.09995	-0.551191	0	0.29777	1.51861	-0.164128
00000003_3.tif	control	8.144	11.731	5.65114	4.92504	-0.726105	0	0.29777	1.46653	-0.216212
00000003_3.tif	control	8.359	12.425	5.65114	4.77564	-0.875504	0	0.29777	1.42204	-0.260699
00000003_3.tif	control	7.734	12.509	5.65114	5.40594	-0.2452	0	0.29777	1.60973	-0.0730132
00000003_3.tif	control	7.595	12.627	5.65114	5.56307	-0.0880719	0	0.29777	1.65652	-0.0262252
00000003_3.tif	control	7.651	17.988	5.65114	8.35273	2.70159	1	0.29777	2.48719	0.804451
00000003_3.tif	control	7.623	17.828	5.65114	8.25004	2.5989	1	0.29777	2.45662	0.773875
00000003_3.tif	control	10.589	19.026	5.65114	7.8004	2.14926	1	0.29777	2.32273	0.639985
00000003_3.tif	control	11.807	19.13	5.65114	7.60527	1.95413	1	0.29777	2.26462	0.581881
00000003_3.tif	control	11.135	18.865	5.65114	7.48877	1.83763	1	0.29777	2.22993	0.547192
00000003_3.tif	control	9.219	15.964	5.65114	5.79641	0.145268	1	0.29777	1.726	0.0432565
00000003_3.tif	control	10.333	15.984	5.65114	5.14174	-0.509396	0	0.29777	1.53106	-0.151683
00000003_3.tif	control	10.443	15.87	5.65114	4.98681	-0.664336	0	0.29777	1.48492	-0.197819
00000003_3.tif	control	10.318	15.844	5.65114	5.03193	-0.619213	0	0.29777	1.49836	-0.184383
00000003_3.tif	control	9.052	13.302	5.65114	4.35015	-1.30099	0	0.29777	1.29535	-0.387395
00000003_3.tif	control	11.894	5.752	5.65114	5.99409	0.342953	1	0.29777	1.78486	0.102121
00000003_3.tif	control	15.526	7.217	5.65114	5.05137	-0.599772	0	0.29777	1.50415	-0.178594
00000003_3.tif	control	17.686	14.359	5.65114	5.36408	-0.28706	0	0.29777	1.59726	-0.0854778
00000003_3.tif	control	17.582	14.491	5.65114	5.3443	-0.306843	0	0.29777	1.59137	-0.0913687
00000003_3.tif	control	15.47	16.668	5.65114	5.58131	-0.0698286	0	0.29777	1.66195	-0.0207929
00000003_3.tif	control	15.033	17.446	5.65114	6.13898	0.487839	1	0.29777	1.828	0.145264
00000003_3.tif	control	17.082	17.377	5.65114	7.01001	1.35887	1	0.29777	2.08737	0.40463
00000003_3.tif	control	17.533	17.446	5.65114	7.33226	1.68112	1	0.29777	2.18333	0.500588
00000003_3.tif	control	17.887	17.446	5.65114	7.55305	1.90191	1	0.29777	2.24907	0.566332
00000003_3.tif	control	18.47	16.898	5.65114	7.54542	1.89428	1	0.29777	2.2468	0.564061
00000003_3.tif	control	17.97	16.863	5.65114	7.17035	1.51921	1	0.29777	2.13511	0.452374
00000004_1.tif	control	8.76	9.417	5.68232	5.43598	-0.24634	0	0.29777	1.61867	-0.0733526
00000004_1.tif	control	11.839	8.911	5.68232	3.14356	-2.53875	0	0.29777	0.936059	-0.755965
00000004_1.tif	control	9.762	15.78	5.68232	6.0435	0.361182	1	0.29777	1.79957	0.107549
00000004_1.tif	control	9.068	15.793	5.68232	6.54173	0.85941	1	0.29777	1.94793	0.255907
00000004_1.tif	control	8.707	16.356	5.68232	7.19173	1.50941	1	0.29777	2.14148	0.449457
00000004_1.tif	control	14.082	15.168	5.68232	3.84706	-1.83525	0	0.29777	1.14554	-0.546484
00000004_1.tif	control	13.464	13.898	5.68232	2.59868	-3.08364	0	0.29777	0.773808	-0.918215
00000004_1.tif	control	14.72	13.363	5.68232	2.21356	-3.46875	0	0.29777	0.659133	-1.03289
00000004_1.tif	control	12.623	10.262	5.68232	1.62463	-4.05768	0	0.29777	0.483767	-1.20826
00000004_1.tif	control	12.665	10.137	5.68232	1.67939	-4.00293	0	0.29777	0.500071	-1.19195
00000004_1.tif	control	14.45	9.318	5.68232	2.09793	-3.58439	0	0.29777	0.6247	-1.06732
00000004_1.tif	control	13.755	7.616	5.68232	3.71319	-1.96913	0	0.29777	1.10568	-0.586347
00000004_1.tif	control	13.345	7.241	5.68232	4.11796	-1.56436	0	0.29777	1.2262	-0.465819
00000004_1.tif	control	12.901	3.484	5.68232	7.90108	2.21876	1	0.29777	2.3527	0.660681
00000004_1.tif	control	16.394	5.977	5.68232	5.92539	0.243072	1	0.29777	1.7644	0.0723795
00000004_1.tif	control	16.498	6.116	5.68232	5.84655	0.164234	1	0.29777	1.74093	0.0489038
00000004_1.tif	control	16.186	6.609	5.68232	5.26598	-0.416338	0	0.29777	1.56805	-0.123973
00000004_1.tif	control	17.769	7.061	5.68232	5.79428	0.111964	1	0.29777	1.72536	0.0333397
00000004_1.tif	control	16.984	8.905	5.68232	3.96222	-1.7201	0	0.29777	1.17983	-0.512194
00000004_1.tif	control	17.609	10.495	5.68232	3.85117	-1.83115	0	0.29777	1.14676	-0.545261
00000004_1.tif	control	16.97	15.457	5.68232	5.17584	-0.50648	0	0.29777	1.54121	-0.150815
00000004_1.tif	control	17.832	17.349	5.68232	7.21919	1.53688	1	0.29777	2.14966	0.457635
00000004_1.tif	control	16.443	16.703	5.68232	5.9682	0.285888	1	0.29777	1.77715	0.0851288
00000004_1.tif	control	15.498	16.273	5.68232	5.2127	-0.469618	0	0.29777	1.55219	-0.139838
00000004_1.tif	control	15.193	16.335	5.68232	5.18424	-0.498072	0	0.29777	1.54371	-0.148311
00000004_1.tif	control	15.012	19.686	5.68232	8.43853	2.75621	1	0.29777	2.51274	0.820717
00000004_1.tif	control	21.672	13.078	5.68232	8.01635	2.33403	1	0.29777	2.38703	0.695005
00000004_1.tif	control	21.755	12.964	5.68232	8.0735	2.39118	1	0.29777	2.40404	0.712021
00000004_1.tif	control	23.411	8.87	5.68232	9.87287	4.19056	1	0.29777	2.93985	1.24782
00000004_1.tif	control	21.474	8.755	5.68232	8.04742	2.3651	1	0.29777	2.39628	0.704257
00000004_1.tif	control	21.349	8.599	5.68232	7.98107	2.29875	1	0.29777	2.37652	0.684499
00000004_1.tif	control	20.078	8.474	5.68232	6.8517	1.16938	1	0.29777	2.04023	0.348207
00000004_1.tif	control	19.62	4.724	5.68232	8.77025	3.08793	1	0.29777	2.61152	0.919494
00000004_4.tif	predator	8.729	7.385	5.79178	6.66944	0.877652	1	0.29777	1.98596	0.261338
00000004_4.tif	predator	10.217	7.762	5.79178	5.21995	-0.571834	0	0.29777	1.55434	-0.170275
00000004_4.tif	predator	10.168	7.95	5.79178	5.15214	-0.63964	0	0.29777	1.53415	-0.190466
00000004_4.tif	predator	10.175	8.165	5.79178	5.02905	-0.76273	0	0.29777	1.4975	-0.227118
00000004_4.tif	predator	7.141	9.911	5.79178	7.35502	1.56323	1	0.29777	2.1901	0.465484
00000004_4.tif	predator	8.932	11.21	5.79178	5.51889	-0.272893	0	0.29777	1.64336	-0.0812593
00000004_4.tif	predator	9.356	11.321	5.79178	5.10538	-0.686408	0	0.29777	1.52023	-0.204392
00000004_4.tif	predator	9.502	11.418	5.79178	4.97055	-0.821239	0	0.29777	1.48008	-0.24454
00000004_4.tif	predator	10.363	12.401	5.79178	4.36626	-1.42552	0	0.29777	1.30014	-0.424478
00000004_4.tif	predator	10.196	12.248	5.79178	4.47178	-1.32001	0	0.29777	1.33156	-0.393059
00000004_4.tif	predator	10.113	13.054	5.79178	4.86194	-0.929844	0	0.29777	1.44774	-0.27688
00000004_4.tif	predator	10.057	12.929	5.79178	4.85658	-0.935204	0	0.29777	1.44614	-0.278476
00000004_4.tif	predator	9.974	13.019	5.79178	4.9705	-0.821282	0	0.29777	1.48007	-0.244553
00000004_4.tif	predator	12.075	14.005	5.79178	3.95542	-1.83636	0	0.29777	1.17781	-0.546814
00000004_4.tif	predator	11.734	8.804	5.79178	3.3806	-2.41118	0	0.29777	1.00664	-0.717978
00000004_4.tif	predator	11.88	8.79	5.79178	3.27372	-2.51807	0	0.29777	0.974814	-0.749805
00000004_4.tif	predator	11.839	6.571	5.79178	4.99194	-0.799847	0	0.29777	1.48645	-0.23817
00000004_4.tif	predator	11.741	5.859	5.79178	5.65813	-0.13365	0	0.29777	1.68482	-0.039797
00000004_4.tif	predator	11.873	5.859	5.79178	5.59642	-0.195366	0	0.29777	1.66645	-0.0581741
00000004_4.tif	predator	11.845	4.943	5.79178	6.43551	0.643722	1	0.29777	1.9163	0.191681
00000004_4.tif	predator	11.818	4.262	5.79178	7.07407	1.28228	1	0.29777	2.10645	0.381826
00000004_4.tif	predator	11.707	4.082	5.79178	7.28247	1.49068	1	0.29777	2.1685	0.443881
00000004_4.tif	predator	10.665	3.401	5.79178	8.33488	2.54309	1	0.29777	2.48188	0.757256
00000004_4.tif	predator	10.623	3.193	5.79178	8.53954	2.74776	1	0.29777	2.54282	0.818201
00000004_4.tif	predator	12.22	3.887	5.79178	7.29153	1.49975	1	0.29777	2.1712	0.44658
00000004_4.tif	predator	12.429	3.88	5.79178	7.23742	1.44564	1	0.29777	2.15509	0.430468
00000004_4.tif	predator	10.845	2.144	5.79178	9.40257	3.61079	1	0.29777	2.7998	1.07518
00000004_4.tif	predator	10.748	2.616	5.79178	9.00751	3.21572	1	0.29777	2.68217	0.957546
00000004_4.tif	predator	11.283	2.04	5.79178	9.34189	3.5501	1	0.29777	2.78173	1.05711
00000004_4.tif	predator	12.88	2.568	5.79178	8.41056	2.61878	1	0.29777	2.50441	0.779794
00000004_4.tif	predator	13.186	1.568	5.79178	9.34921	3.55743	1	0.29777	2.78391	1.05929
00000004_4.tif	predator	13.095	1.387	5.79178	9.54099	3.74921	1	0.29777	2.84102	1.1164
00000004_4.tif	predator	12.422	1.144	5.79178	9.89651	4.10473	1	0.29777	2.94688	1.22227
00000004_4.tif	predator	15.63	5.047	5.79178	5.90751	0.115724	1	0.29777	1.75908	0.0344592
00000004_4.tif	predator	15.665	5.193	5.79178	5.77193	-0.0198587	0	0.29777	1.71871	-0.00591332
00000004_4.tif	predator	18.62	2.911	5.79178	8.95808	3.1663	1	0.29777	2.66745	0.942828
00000004_4.tif	predator	22.495	7.089	5.79178	8.88441	3.09263	1	0.29777	2.64551	0.920892
00000004_4.tif	predator	22.724	7.193	5.79178	9.05027	3.25849	1	0.29777	2.6949	0.970279
00000004_4.tif	predator	22.175	13.97	5.79178	8.34877	2.55698	1	0.29777	2.48601	0.761393
00000004_4.tif	predator	24.068	11.724	5.79178	9.67113	3.87935	1	0.29777	2.87977	1.15515
00000001_2.tif	control	5.229	7.302	5.70819	9.71814	4.00995	1	0.29777	2.89377	1.19404
00000001_2.tif	control	10.668	16.759	5.70819	6.11847	0.410272	1	0.29777	1.8219	0.122167
00000001_2.tif	control	10.842	16.495	5.70819	5.80233	0.0941368	1	0.29777	1.72776	0.0280311
00000001_2.tif	control	10.405	15.311	5.70819	5.13507	-0.573124	0	0.29777	1.52907	-0.170659
00000001_2.tif	control	11.363	15.102	5.70819	4.35756	-1.35064	0	0.29777	1.29755	-0.40218
00000001_2.tif	control	11.953	15.179	5.70819	4.10271	-1.60548	0	0.29777	1.22166	-0.478064
00000001_2.tif	control	10.71	14.679	5.70819	4.47234	-1.23585	0	0.29777	1.33173	-0.367999
00000001_2.tif	control	10.793	14.554	5.70819	4.32616	-1.38204	0	0.29777	1.2882	-0.411529
00000001_2.tif	control	10.696	14.443	5.70819	4.32346	-1.38473	0	0.29777	1.2874	-0.412332
00000001_2.tif	control	9.55	14.505	5.70819	5.27412	-0.434075	0	0.29777	1.57047	-0.129255
00000001_2.tif	control	13.592	8.28	5.70819	3.33307	-2.37513	0	0.29777	0.992487	-0.707242
00000001_2.tif	control	13.717	8.273	5.70819	3.32902	-2.37917	0	0.29777	0.991284	-0.708445
00000001_2.tif	control	12.974	14.786	5.70819	3.3373	-2.3709	0	0.29777	0.993746	-0.705982
00000001_2.tif	control	12.516	14.981	5.70819	3.67728	-2.03091	0	0.29777	1.09498	-0.604745
00000001_2.tif	control	18.464	19.224	5.70819	8.86629	3.1581	1	0.29777	2.64012	0.940387
00000001_2.tif	control	18.332	19.182	5.70819	8.7634	3.05521	1	0.29777	2.60948	0.909749
00000001_2.tif	control	19.04	16.47	5.70819	7.0501	1.3419	1	0.29777	2.09931	0.399578
00000001_2.tif	control	19.116	12.193	5.70819	5.2026	-0.505596	0	0.29777	1.54918	-0.150551
00000001_2.tif	control	18.845	10.273	5.70819	5.07205	-0.636148	0	0.29777	1.5103	-0.189426
00000001_2.tif	control	18.547	10.036	5.70819	4.85574	-0.852458	0	0.29777	1.44589	-0.253836
00000001_2.tif	control	19.144	8.37	5.70819	6.11495	0.406755	1	0.29777	1.82085	0.121119
00000001_2.tif	control	16.637	5.977	5.70819	6.22747	0.519279	1	0.29777	1.85435	0.154626
00000001_2.tif	control	17.401	6.095	5.70819	6.49324	0.78505	1	0.29777	1.93349	0.233764
00000001_2.tif	control	16.929	3.998	5.70819	8.16	2.45181	1	0.29777	2.4298	0.730074
00000001_2.tif	control	16.686	3.984	5.70819	8.08757	2.37937	1	0.29777	2.40823	0.708506
00000001_2.tif	control	23.286	7.984	5.70819	10.0115	4.30332	1	0.29777	2.98113	1.2814
00000001_2.tif	control	23.297	7.797	5.70819	10.0906	4.38245	1	0.29777	3.00469	1.30496
00000001_5.tif	predator	6.979	6.99	5.41143	9.00521	3.59379	1	0.29777	2.68148	1.07012
00000001_5.tif	predator	10.609	5.839	5.41143	7.45853	2.04711	1	0.29777	2.22093	0.609567
00000001_5.tif	predator	10.943	6.443	5.41143	6.76834	1.35692	1	0.29777	2.01541	0.404049
00000001_5.tif	predator	12.207	7.352	5.41143	5.40601	-0.00541483	0	0.29777	1.60975	-0.00161237
00000001_5.tif	predator	12.227	7.526	5.41143	5.23703	-0.174399	0	0.29777	1.55943	-0.0519309
00000001_5.tif	predator	9.29	18.55	5.41143	7.88088	2.46945	1	0.29777	2.34669	0.735329
00000001_5.tif	predator	14.925	9.849	5.41143	2.63473	-2.7767	0	0.29777	0.784543	-0.826818
00000001_5.tif	predator	15.502	10.821	5.41143	2.03567	-3.37576	0	0.29777	0.606162	-1.0052
00000001_5.tif	predator	15.668	8.884	5.41143	3.79442	-1.61701	0	0.29777	1.12987	-0.481496
00000001_5.tif	predator	14.953	8.398	5.41143	4.05388	-1.35755	0	0.29777	1.20712	-0.404238
00000001_5.tif	predator	14.189	9.307	5.41143	3.073	-2.33843	0	0.29777	0.915048	-0.696313
00000001_5.tif	predator	13.939	8.238	5.41143	4.14978	-1.26165	0	0.29777	1.23568	-0.375681
00000001_5.tif	predator	13.842	8.12	5.41143	4.27444	-1.13699	0	0.29777	1.2728	-0.338562
00000001_5.tif	predator	13.939	8.057	5.41143	4.33046	-1.08097	0	0.29777	1.28948	-0.321881
00000001_5.tif	predator	14.203	8.092	5.41143	4.28801	-1.12342	0	0.29777	1.27684	-0.33452
00000001_5.tif	predator	14.252	7.974	5.41143	4.4064	-1.00503	0	0.29777	1.31209	-0.299269
00000001_5.tif	predator	14.672	2.297	5.41143	10.0944	4.68294	1	0.29777	3.0058	1.39444
00000001_5.tif	predator	14.505	2.089	5.41143	10.2957	4.8843	1	0.29777	3.06576	1.4544
00000001_5.tif	predator	17.595	6.005	5.41143	7.22594	1.81451	1	0.29777	2.15167	0.540308
00000001_5.tif	predator	17.727	7.655	5.41143	5.90041	0.488977	1	0.29777	1.75696	0.145603
00000001_5.tif	predator	17.033	9.363	5.41143	4.14342	-1.26801	0	0.29777	1.23378	-0.377576
00000001_5.tif	predator	16.748	9.627	5.41143	3.75593	-1.65549	0	0.29777	1.1184	-0.492957
00000001_5.tif	predator	17.172	10.825	5.41143	3.36043	-2.051	0	0.29777	1.00063	-0.610727
00000001_5.tif	predator	21.953	9.464	5.41143	8.28979	2.87836	1	0.29777	2.46845	0.85709
00000001_5.tif	predator	22.089	9.318	5.41143	8.46892	3.0575	1	0.29777	2.52179	0.91043
00000001_5.tif	predator	22.078	7.703	5.41143	9.16775	3.75632	1	0.29777	2.72988	1.11852
00000005_3.tif	control	9.667	15.25	5.53119	6.06669	0.535507	1	0.29777	1.80648	0.159458
00000005_3.tif	control	10.03	14.852	5.53119	5.5378	0.00661529	1	0.29777	1.64899	0.00196984
00000005_3.tif	control	11.085	15.352	5.53119	5.08602	-0.445169	0	0.29777	1.51446	-0.132558
00000005_3.tif	control	11.21	15.352	5.53119	5.00295	-0.528242	0	0.29777	1.48973	-0.157295
00000005_3.tif	control	14.717	15.585	5.53119	4.00788	-1.52331	0	0.29777	1.19343	-0.453596
00000005_3.tif	control	14.474	14.793	5.53119	3.21011	-2.32108	0	0.29777	0.955873	-0.691149
00000005_3.tif	control	13.314	14.28	5.53119	2.94625	-2.58493	0	0.29777	0.877306	-0.769716
00000005_3.tif	control	12.488	14.168	5.53119	3.27572	-2.25546	0	0.29777	0.975412	-0.671609
00000005_3.tif	control	15.189	14.807	5.53119	3.2968	-2.23439	0	0.29777	0.981688	-0.665333
00000005_3.tif	control	15.641	15.911	5.53119	4.47588	-1.05531	0	0.29777	1.33278	-0.31424
00000005_3.tif	control	16.036	15.877	5.53119	4.56045	-0.970735	0	0.29777	1.35797	-0.289056
00000005_3.tif	control	16.106	15.807	5.53119	4.51901	-1.01218	0	0.29777	1.34562	-0.301397
00000005_3.tif	control	12.752	8.741	5.53119	3.33654	-2.19465	0	0.29777	0.99352	-0.653502
00000005_3.tif	control	12.877	8.686	5.53119	3.32065	-2.21053	0	0.29777	0.988791	-0.658231
00000005_3.tif	control	13.543	7.901	5.53119	3.80434	-1.72685	0	0.29777	1.13282	-0.514205
00000005_3.tif	control	13.634	7.352	5.53119	4.31872	-1.21247	0	0.29777	1.28598	-0.361037
00000005_3.tif	control	16.925	8.696	5.53119	3.77033	-1.76086	0	0.29777	1.12269	-0.52433
00000005_3.tif	control	18.356	9.578	5.53119	4.34612	-1.18507	0	0.29777	1.29414	-0.352878
00000005_3.tif	control	18.46	10.286	5.53119	4.16699	-1.3642	0	0.29777	1.2408	-0.406217
00000005_3.tif	control	18.106	13.627	5.53119	4.14502	-1.38617	0	0.29777	1.23426	-0.41276
00000005_3.tif	control	18.488	13.405	5.53119	4.3845	-1.14669	0	0.29777	1.30557	-0.34145
00000005_3.tif	control	18.682	14.155	5.53119	4.90961	-0.621574	0	0.29777	1.46194	-0.185086
00000005_3.tif	control	17.405	14.759	5.53119	4.30418	-1.227	0	0.29777	1.28166	-0.365365
00000005_3.tif	control	16.543	15.707	5.53119	4.60231	-0.928881	0	0.29777	1.37043	-0.276593
00000005_3.tif	control	18.148	17.464	5.53119	6.92055	1.38937	1	0.29777	2.06073	0.413712
00000005_3.tif	control	18.321	17.359	5.53119	6.92548	1.39429	1	0.29777	2.0622	0.415177
00000005_3.tif	control	19.252	17.589	5.53119	7.65856	2.12737	1	0.29777	2.28049	0.633468
00000005_3.tif	control	18.99	12.521	5.53119	4.58693	-0.944256	0	0.29777	1.36585	-0.281171
00000005_4.tif	control	8.021	4.752	5.64065	8.69323	3.05257	1	0.29777	2.58858	0.908965
00000005_4.tif	control	8.349	3.962	5.64065	9.15627	3.51561	1	0.29777	2.72646	1.04684
00000005_4.tif	control	8.71	3.858	5.64065	9.05783	3.41717	1	0.29777	2.69715	1.01753
00000005_4.tif	control	8.773	3.844	5.64065	9.03854	3.39788	1	0.29777	2.6914	1.01179
00000005_4.tif	control	12.439	15.323	5.64065	3.72059	-1.92007	0	0.29777	1.10788	-0.571739
00000005_4.tif	control	13.377	15.33	5.64065	3.63905	-2.00161	0	0.29777	1.0836	-0.596019
00000005_4.tif	control	12.731	14.747	5.64065	3.09863	-2.54203	0	0.29777	0.922678	-0.756939
00000005_4.tif	control	12.884	14.566	5.64065	2.89686	-2.7438	0	0.29777	0.862597	-0.817021
00000005_4.tif	control	11.342	12.42	5.64065	2.04648	-3.59417	0	0.29777	0.609382	-1.07024
00000005_4.tif	control	14.05	9.597	5.64065	2.2417	-3.39895	0	0.29777	0.667512	-1.01211
00000005_4.tif	control	13.578	8.924	5.64065	2.78778	-2.85288	0	0.29777	0.830116	-0.849502
00000005_4.tif	control	13.536	8.764	5.64065	2.94245	-2.69821	0	0.29777	0.876173	-0.803445
00000005_4.tif	control	11.293	8.354	5.64065	3.87277	-1.76788	0	0.29777	1.1532	-0.526422
00000005_4.tif	control	14.474	8.375	5.64065	3.53484	-2.10582	0	0.29777	1.05257	-0.627049
00000005_4.tif	control	14.238	9.236	5.64065	2.64634	-2.99431	0	0.29777	0.788002	-0.891616
00000005_4.tif	control	15.043	11.535	5.64065	1.79497	-3.84569	0	0.29777	0.534487	-1.14513
00000005_4.tif	control	15.814	11.451	5.64065	2.57042	-3.07024	0	0.29777	0.765393	-0.914225
00000005_4.tif	control	14.668	13.465	5.64065	2.2664	-3.37426	0	0.29777	0.674865	-1.00475
00000005_4.tif	control	16.064	14.34	5.64065	3.85967	-1.78098	0	0.29777	1.1493	-0.530322
00000005_4.tif	control	15.099	15.194	5.64065	3.95694	-1.68372	0	0.29777	1.17826	-0.501361
00000005_4.tif	control	14.682	15.41	5.64065	3.98151	-1.65914	0	0.29777	1.18557	-0.494044
00000005_4.tif	control	14.13	21.382	5.64065	9.72843	4.08778	1	0.29777	2.89683	1.21722
00000005_4.tif	control	14.255	21.34	5.64065	9.69869	4.05804	1	0.29777	2.88798	1.20836
00000005_4.tif	control	16.443	11.653	5.64065	3.18825	-2.4524	0	0.29777	0.949365	-0.730252
00000005_4.tif	control	17.38	11.674	5.64065	4.12504	-1.51561	0	0.29777	1.22831	-0.451303
00000005_4.tif	control	17.339	11.569	5.64065	4.08588	-1.55477	0	0.29777	1.21665	-0.462965
00000005_4.tif	control	17.214	12.177	5.64065	3.98848	-1.65218	0	0.29777	1.18765	-0.491969
00000005_4.tif	control	18.01	11.464	5.64065	4.76051	-0.880143	0	0.29777	1.41754	-0.26208
00000005_4.tif	control	17.927	11.474	5.64065	4.67713	-0.963524	0	0.29777	1.39271	-0.286909
00000005_4.tif	control	17.125	10.427	5.64065	4.07181	-1.56884	0	0.29777	1.21246	-0.467154
00000005_4.tif	control	16.922	10.328	5.64065	3.91281	-1.72784	0	0.29777	1.16512	-0.514499
00000005_4.tif	control	21.172	9.866	5.64065	8.12507	2.48442	1	0.29777	2.4194	0.739785
00000005_4.tif	control	21.144	10.061	5.64065	8.05604	2.41538	1	0.29777	2.39885	0.719229
00000005_4.tif	control	21.373	10.54	5.64065	8.19947	2.55882	1	0.29777	2.44156	0.761939
00000005_4.tif	control	20.068	12.193	5.64065	6.83132	1.19067	1	0.29777	2.03416	0.354545
00000005_4.tif	control	19.852	12.2	5.64065	6.61645	0.975799	1	0.29777	1.97018	0.290564
00000006_1.tif	control	5.479	16.042	5.71368	9.19511	3.48143	1	0.29777	2.73803	1.03666
00000006_1.tif	control	7.082	11.575	5.71368	6.97011	1.25642	1	0.29777	2.07549	0.374125
00000006_1.tif	control	6.325	11.144	5.71368	7.78644	2.07276	1	0.29777	2.31857	0.617205
00000006_1.tif	control	8.898	12.939	5.71368	5.10108	-0.612599	0	0.29777	1.51895	-0.182414
00000006_1.tif	control	8.793	13.703	5.71368	5.31816	-0.395524	0	0.29777	1.58359	-0.117775
00000006_1.tif	control	10.786	10.453	5.71368	3.82257	-1.89111	0	0.29777	1.13825	-0.563117
00000006_1.tif	control	10.613	10.432	5.71368	3.97956	-1.73413	0	0.29777	1.18499	-0.516371
00000006_1.tif	control	10.321	10.474	5.71368	4.20891	-1.50478	0	0.29777	1.25329	-0.448077
00000006_1.tif	control	11.974	20.026	5.71368	7.74439	2.0307	1	0.29777	2.30605	0.604683
00000006_1.tif	control	14.401	16.234	5.71368	3.71051	-2.00318	0	0.29777	1.10488	-0.596486
00000006_1.tif	control	12.811	11.321	5.71368	1.69676	-4.01692	0	0.29777	0.505245	-1.19612
00000006_1.tif	control	12.776	11.196	5.71368	1.81231	-3.90137	0	0.29777	0.539651	-1.16171
00000006_1.tif	control	14.116	11.293	5.71368	1.26093	-4.45276	0	0.29777	0.375467	-1.3259
00000006_1.tif	control	15.946	8.155	5.71368	4.81031	-0.903371	0	0.29777	1.43237	-0.268997
00000006_1.tif	control	16.571	7.96	5.71368	5.26623	-0.447457	0	0.29777	1.56812	-0.133239
00000006_1.tif	control	16.849	7.918	5.71368	5.44388	-0.2698	0	0.29777	1.62103	-0.0803384
00000006_1.tif	control	19.207	12.734	5.71368	5.22635	-0.487337	0	0.29777	1.55625	-0.145114
00000006_1.tif	control	18.894	12.196	5.71368	4.92253	-0.791154	0	0.29777	1.46578	-0.235582
00000006_1.tif	control	18.887	12.064	5.71368	4.92673	-0.786951	0	0.29777	1.46703	-0.23433
00000006_1.tif	control	19.283	11.849	5.71368	5.34477	-0.36891	0	0.29777	1.59151	-0.10985
00000006_1.tif	control	18.908	10.467	5.71368	5.34529	-0.368389	0	0.29777	1.59167	-0.109695
00000006_1.tif	control	18.804	10.05	5.71368	5.42839	-0.285294	0	0.29777	1.61641	-0.0849521
00000006_1.tif	control	18.825	9.884	5.71368	5.52511	-0.188573	0	0.29777	1.64521	-0.0561513
00000006_1.tif	control	20.165	4.373	5.71368	10.2479	4.5342	1	0.29777	3.05151	1.35015
00000006_7.tif	predator	4.979	10.104	5.20851	10.6466	5.43809	1	0.29777	3.17024	1.6193
00000006_7.tif	predator	5.318	10.342	5.20851	10.2549	5.04634	1	0.29777	3.05359	1.50265
00000006_7.tif	predator	5.464	10.356	5.20851	10.1106	4.90205	1	0.29777	3.01062	1.45968
00000006_7.tif	predator	5.609	10.53	5.20851	9.92428	4.71576	1	0.29777	2.95515	1.40421
00000006_7.tif	predator	11.356	15.168	5.20851	4.34259	-0.865924	0	0.29777	1.29309	-0.257846
00000006_7.tif	predator	12.141	15.064	5.20851	3.61164	-1.59687	0	0.29777	1.07544	-0.475501
00000006_7.tif	predator	9.099	14.12	5.20851	6.16976	0.961249	1	0.29777	1.83717	0.286231
00000006_7.tif	predator	8.988	14.155	5.20851	6.28497	1.07646	1	0.29777	1.87148	0.320538
00000006_7.tif	predator	8.856	13.71	5.20851	6.35897	1.15045	1	0.29777	1.89351	0.342571
00000006_7.tif	predator	9.696	12.797	5.20851	5.50179	0.293274	1	0.29777	1.63827	0.0873282
00000006_7.tif	predator	12.134	12.089	5.20851	3.22494	-1.98358	0	0.29777	0.960289	-0.590649
00000006_7.tif	predator	12.203	12.957	5.20851	2.98972	-2.21879	0	0.29777	0.89025	-0.660689
00000006_7.tif	predator	10.189	11.359	5.20851	5.30177	0.0932573	1	0.29777	1.57871	0.0277692
00000006_7.tif	predator	13.21	9.828	5.20851	3.84483	-1.36369	0	0.29777	1.14487	-0.406065
00000006_7.tif	predator	14.026	7.418	5.20851	5.8241	0.615584	1	0.29777	1.73424	0.183302
00000006_7.tif	predator	15.387	13.359	5.20851	0.307176	-4.90134	0	0.29777	0.0914678	-1.45947
00000006_7.tif	predator	16.342	18.273	5.20851	5.27576	0.0672458	1	0.29777	1.57096	0.0200238
00000006_7.tif	predator	16.488	18.238	5.20851	5.27568	0.0671652	1	0.29777	1.57094	0.0199998
00000006_7.tif	predator	16.613	16.036	5.20851	3.24107	-1.96744	0	0.29777	0.965094	-0.585845
00000006_7.tif	predator	16.648	16.134	5.20851	3.3445	-1.86401	0	0.29777	0.995892	-0.555047
00000006_7.tif	predator	15.877	15.238	5.20851	2.2225	-2.98602	0	0.29777	0.661793	-0.889146
00000006_7.tif	predator	17.106	15.703	5.20851	3.21322	-1.99529	0	0.29777	0.956802	-0.594137
00000006_7.tif	predator	18.03	16.078	5.20851	4.09844	-1.11008	0	0.29777	1.22039	-0.330547
00000006_7.tif	predator	18.974	16.502	5.20851	5.07326	-0.135256	0	0.29777	1.51066	-0.0402752
00000006_7.tif	predator	18.446	13.79	5.20851	3.32518	-1.88334	0	0.29777	0.990137	-0.560801
00000006_7.tif	predator	18.328	12.849	5.20851	3.15211	-2.05641	0	0.29777	0.938603	-0.612336
00000006_7.tif	predator	17.057	11.05	5.20851	2.79263	-2.41588	0	0.29777	0.831562	-0.719377
00000006_7.tif	predator	15.96	8.845	5.20851	4.34907	-0.859445	0	0.29777	1.29502	-0.255917
00000006_7.tif	predator	17.405	8.311	5.20851	5.29997	0.0914583	1	0.29777	1.57817	0.0272335
00000006_7.tif	predator	22.203	5.672	5.20851	10.2351	5.0266	1	0.29777	3.04771	1.49677
00000006_7.tif	predator	21.214	11.547	5.20851	6.22919	1.02067	1	0.29777	1.85486	0.303926
00000006_7.tif	predator	19.661	12.901	5.20851	4.47861	-0.729907	0	0.29777	1.33359	-0.217344
00000006_7.tif	predator	19.717	13.505	5.20851	4.54491	-0.663598	0	0.29777	1.35334	-0.1976
00000006_7.tif	predator	19.807	13.415	5.20851	4.62809	-0.580417	0	0.29777	1.37811	-0.172831
00000006_7.tif	predator	20.245	13.332	5.20851	5.06123	-0.147277	0	0.29777	1.50708	-0.0438547
00000006_7.tif	predator	20.62	13.922	5.20851	5.49016	0.281646	1	0.29777	1.6348	0.0838657
00000006_7.tif	predator	20.689	13.998	5.20851	5.56984	0.361329	1	0.29777	1.65853	0.107593
00000006_7.tif	predator	20.307	14.373	5.20851	5.26893	0.060422	1	0.29777	1.56893	0.0179919
00000006_7.tif	predator	20.057	14.464	5.20851	5.04976	-0.158751	0	0.29777	1.50367	-0.0472714
00000006_7.tif	predator	21.224	14.977	5.20851	6.31373	1.10522	1	0.29777	1.88004	0.329101
00000006_7.tif	predator	21.967	14.901	5.20851	7.00778	1.79927	1	0.29777	2.08671	0.535769
00000006_7.tif	predator	20.807	16.252	5.20851	6.4305	1.22198	1	0.29777	1.91481	0.36387
00000006_7.tif	predator	19.425	17.078	5.20851	5.79469	0.586173	1	0.29777	1.72548	0.174545
00000006_7.tif	predator	22.092	15.731	5.20851	7.37946	2.17095	1	0.29777	2.19738	0.646444
00000006_7.tif	predator	22.092	15.481	5.20851	7.29493	2.08641	1	0.29777	2.17221	0.621272
00000006_8.tif	predator	6.521	14.104	5.60431	8.47168	2.86737	1	0.29777	2.52261	0.853817
00000006_8.tif	predator	6.738	13.877	5.60431	8.21256	2.60825	1	0.29777	2.44545	0.776659
00000006_8.tif	predator	7.196	14.766	5.60431	7.99526	2.39096	1	0.29777	2.38075	0.711955
00000006_8.tif	predator	7.891	15.023	5.60431	7.42949	1.82518	1	0.29777	2.21228	0.543484
00000006_8.tif	predator	8.773	16.523	5.60431	7.36939	1.76508	1	0.29777	2.19438	0.525587
00000006_8.tif	predator	9.127	16.884	5.60431	7.30561	1.70131	1	0.29777	2.17539	0.506598
00000006_8.tif	predator	8.161	5.009	5.60431	9.83396	4.22965	1	0.29777	2.92826	1.25946
00000006_8.tif	predator	10.092	4.116	5.60431	9.41244	3.80813	1	0.29777	2.80274	1.13395
00000006_8.tif	predator	10.245	4.054	5.60431	9.39118	3.78687	1	0.29777	2.79641	1.12762
00000006_8.tif	predator	12.481	5.203	5.60431	7.43622	1.83191	1	0.29777	2.21428	0.545488
00000006_8.tif	predator	9.766	9.804	5.60431	5.59882	-0.00549026	0	0.29777	1.66716	-0.00163484
00000006_8.tif	predator	9.523	11.089	5.60431	5.39995	-0.204356	0	0.29777	1.60794	-0.0608511
00000006_8.tif	predator	10.453	11.019	5.60431	4.51602	-1.08829	0	0.29777	1.34473	-0.32406
00000006_8.tif	predator	11.03	11.589	5.60431	3.82332	-1.78099	0	0.29777	1.13847	-0.530325
00000006_8.tif	predator	11.793	11.387	5.60431	3.12657	-2.47774	0	0.29777	0.931	-0.737795
00000006_8.tif	predator	11.905	12.106	5.60431	2.89171	-2.7126	0	0.29777	0.861065	-0.80773
00000006_8.tif	predator	11.488	12.474	5.60431	3.31023	-2.29408	0	0.29777	0.985687	-0.683108
00000006_8.tif	predator	9.738	18.977	5.60431	8.39722	2.79291	1	0.29777	2.50044	0.831646
00000006_8.tif	predator	9.842	18.818	5.60431	8.20766	2.60335	1	0.29777	2.444	0.7752
00000006_8.tif	predator	10.953	19.741	5.60431	8.39874	2.79443	1	0.29777	2.50089	0.832098
00000006_8.tif	predator	10.745	19.582	5.60431	8.35637	2.75206	1	0.29777	2.48828	0.819482
00000006_8.tif	predator	10.745	19.457	5.60431	8.24723	2.64292	1	0.29777	2.45578	0.786983
00000006_8.tif	predator	11.759	19.859	5.60431	8.17171	2.5674	1	0.29777	2.43329	0.764495
00000006_8.tif	predator	11.877	19.769	5.60431	8.0447	2.44039	1	0.29777	2.39547	0.726676
00000006_8.tif	predator	14.252	20.286	5.60431	8.03317	2.42886	1	0.29777	2.39204	0.723242
00000006_8.tif	predator	14.425	20.273	5.60431	8.01041	2.4061	1	0.29777	2.38526	0.716465
00000006_8.tif	predator	15.266	16.321	5.60431	4.07764	-1.52667	0	0.29777	1.2142	-0.454595
00000006_8.tif	predator	15.196	16.314	5.60431	4.06313	-1.54117	0	0.29777	1.20988	-0.458915
00000006_8.tif	predator	14.759	7.227	5.60431	5.04411	-0.5602	0	0.29777	1.50198	-0.166811
00000006_8.tif	predator	18.71	8.214	5.60431	5.64003	0.0357246	1	0.29777	1.67943	0.0106377
00000006_8.tif	predator	17.863	12.63	5.60431	3.09191	-2.5124	0	0.29777	0.920679	-0.748116
00000006_8.tif	predator	18.703	12.616	5.60431	3.92619	-1.67812	0	0.29777	1.1691	-0.499694
00000006_8.tif	predator	22.318	7.943	5.60431	8.68172	3.07741	1	0.29777	2.58516	0.916361
00000007_6.tif	predator	8.156	7.083	6.32829	6.76772	0.43943	1	0.29777	2.01522	0.130849
00000007_6.tif	predator	8.609	7.092	6.32829	6.38909	0.0608007	1	0.29777	1.90248	0.0181046
00000007_6.tif	predator	8.637	6.8	6.32829	6.54102	0.212735	1	0.29777	1.94772	0.063346
00000007_6.tif	predator	9.651	7.78	6.32829	5.1415	-1.18678	0	0.29777	1.53099	-0.353388
00000007_6.tif	predator	8.47	9.203	6.32829	5.57283	-0.75546	0	0.29777	1.65942	-0.224953
00000007_6.tif	predator	10.457	9.321	6.32829	3.66479	-2.66349	0	0.29777	1.09126	-0.793109
00000007_6.tif	predator	9.241	11.759	6.32829	4.66419	-1.6641	0	0.29777	1.38886	-0.495518
00000007_6.tif	predator	9.165	11.745	6.32829	4.73582	-1.59246	0	0.29777	1.41019	-0.474188
00000007_6.tif	predator	10.533	14.873	6.32829	5.22029	-1.108	0	0.29777	1.55445	-0.329928
00000007_6.tif	predator	14.109	15.729	6.32829	4.93126	-1.39703	0	0.29777	1.46838	-0.415994
00000007_6.tif	predator	14.177	15.651	6.32829	4.85811	-1.47018	0	0.29777	1.4466	-0.437774
00000007_6.tif	predator	14.146	15.562	6.32829	4.76707	-1.56122	0	0.29777	1.41949	-0.464884
00000007_6.tif	predator	12.193	14.708	6.32829	4.22171	-2.10658	0	0.29777	1.2571	-0.627276
00000007_6.tif	predator	11.932	14.688	6.32829	4.3102	-2.01809	0	0.29777	1.28345	-0.600927
00000007_6.tif	predator	14.036	13.958	6.32829	3.15931	-3.16898	0	0.29777	0.940748	-0.943626
00000007_6.tif	predator	11.604	13.312	6.32829	3.3359	-2.99239	0	0.29777	0.993331	-0.891043
00000007_6.tif	predator	12.057	10.776	6.32829	1.75027	-4.57801	0	0.29777	0.521179	-1.36319
00000007_6.tif	predator	13.068	10.271	6.32829	0.912917	-5.41537	0	0.29777	0.271839	-1.61253
00000007_6.tif	predator	13.365	7.01	6.32829	3.82264	-2.50565	0	0.29777	1.13827	-0.746106
00000007_6.tif	predator	14.552	5.474	6.32829	5.38479	-0.943501	0	0.29777	1.60343	-0.280946
00000007_6.tif	predator	15.12	5.854	6.32829	5.12408	-1.20421	0	0.29777	1.5258	-0.358577
00000007_6.tif	predator	15.245	8.599	6.32829	2.63498	-3.69331	0	0.29777	0.784617	-1.09976
00000007_6.tif	predator	15.406	8.797	6.32829	2.56844	-3.75984	0	0.29777	0.764805	-1.11957
00000007_6.tif	predator	14.62	9.781	6.32829	1.30906	-5.01922	0	0.29777	0.3898	-1.49457
00000007_6.tif	predator	14.62	9.901	6.32829	1.21729	-5.11099	0	0.29777	0.362474	-1.5219
00000007_6.tif	predator	16.432	9.646	6.32829	2.87029	-3.458	0	0.29777	0.854685	-1.02969
00000007_6.tif	predator	16.839	11.932	6.32829	3.23398	-3.0943	0	0.29777	0.962983	-0.92139
00000007_6.tif	predator	16.995	11.969	6.32829	3.39317	-2.93512	0	0.29777	1.01038	-0.87399
00000007_6.tif	predator	15.792	13.344	6.32829	3.22127	-3.10701	0	0.29777	0.959198	-0.925176
00000007_6.tif	predator	16.156	14.464	6.32829	4.34643	-1.98186	0	0.29777	1.29424	-0.590137
00000007_6.tif	predator	16.255	14.307	6.32829	4.27115	-2.05714	0	0.29777	1.27182	-0.612554
00000007_6.tif	predator	17.135	13.792	6.32829	4.47055	-1.85774	0	0.29777	1.3312	-0.553178
00000007_6.tif	predator	18.769	11.661	6.32829	5.03495	-1.29333	0	0.29777	1.49926	-0.385116
00000007_6.tif	predator	18.88	11.627	6.32829	5.13885	-1.18944	0	0.29777	1.53019	-0.35418
00000007_6.tif	predator	18.29	10.002	6.32829	4.5547	-1.77358	0	0.29777	1.35625	-0.52812
00000007_6.tif	predator	18.832	7.175	6.32829	6.20017	-0.128121	0	0.29777	1.84622	-0.0381505
00000007_6.tif	predator	18.832	7.078	6.32829	6.25748	-0.0708052	0	0.29777	1.86329	-0.0210837
