# Supplementary material for: Dopamine signaling regulates predator-driven changes in Caenorhabditis elegans’ egg laying behavior
Source: eLife. 2023 Jul 11;12:e83957. doi: 10.7554/eLife.83957 (PMC10335835; doi:10.7554/eLife.83957)
Supplement: Figure 1—source data 1. — For each test arena, data tabulate the arena, strain, condition, <x,y> coordinates in pixels, lawn radius in pixels, the egg distance from arena center in pixels, the egg distance from lawn edge in pixels, position as 1 (off) or 0 (on) lawn, the conversion factor for pixel data in mm-per-pixel, the calculated distance from center in mm, the calculated distance from the lawn edge in mm. [file elife-83957-fig1-data1.xlsx]

## Sheet: Figure1B-C
Arena	Strain	Predator	X	Y	LawnRadius	DistCenterPx	DistEdgePx	off	PxScale	DistCenterMm	DistEdgeMm
00000008_1.tif	CX7389	Control	14.851	2.817	4.87001	9.21587	4.34586	1	0.29777	2.74421	1.28203
00000008_1.tif	CX7389	Control	14.668	2.821	4.87001	9.23435	4.36434	1	0.29777	2.74971	1.28748
00000008_1.tif	CX7389	Control	14.164	3.251	4.87001	8.89231	4.02231	1	0.29777	2.64786	1.18658
00000008_1.tif	CX7389	Control	20.482	3.392	4.87001	9.73283	4.86283	1	0.29777	2.89815	1.43453
00000008_1.tif	CX7389	Control	14.235	3.423	4.87001	8.70988	3.83987	1	0.29777	2.59354	1.13276
00000008_1.tif	CX7389	Control	20.553	3.627	4.87001	9.56068	4.69068	1	0.29777	2.84688	1.38375
00000008_1.tif	CX7389	Control	12.153	3.922	4.87001	8.87735	4.00735	1	0.29777	2.64341	1.18217
00000008_1.tif	CX7389	Control	11.79	4.148	4.87001	8.83541	3.96541	1	0.29777	2.63092	1.16979
00000008_1.tif	CX7389	Control	13.85	4.338	4.87001	7.90406	3.03406	1	0.29777	2.35359	0.895046
00000008_1.tif	CX7389	Control	9.638	4.713	4.87001	9.58239	4.71238	1	0.29777	2.85335	1.39015
00000008_1.tif	CX7389	Control	9.643	4.818	4.87001	9.49978	4.62978	1	0.29777	2.82875	1.36578
00000008_1.tif	CX7389	Control	10.541	4.838	4.87001	8.9188	4.04879	1	0.29777	2.65575	1.19439
00000008_1.tif	CX7389	Control	10.476	5.101	4.87001	8.74988	3.87987	1	0.29777	2.60545	1.14456
00000008_1.tif	CX7389	Control	10.499	5.208	4.87001	8.65173	3.78172	1	0.29777	2.57623	1.11561
00000008_1.tif	CX7389	Control	21.47	5.248	4.87001	8.73867	3.86866	1	0.29777	2.60211	1.14126
00000008_1.tif	CX7389	Control	15.412	5.655	4.87001	6.33713	1.46712	1	0.29777	1.88701	0.432801
00000008_1.tif	CX7389	Control	15.326	5.932	4.87001	6.06836	1.19835	1	0.29777	1.80698	0.353515
00000008_1.tif	CX7389	Control	23.035	6.122	4.87001	9.23486	4.36485	1	0.29777	2.74986	1.28763
00000008_1.tif	CX7389	Control	10.424	6.22	4.87001	7.93704	3.06703	1	0.29777	2.36341	0.904775
00000008_1.tif	CX7389	Control	10.251	6.217	4.87001	8.05932	3.18932	1	0.29777	2.39982	0.940848
00000008_1.tif	CX7389	Control	10.262	6.414	4.87001	7.91197	3.04196	1	0.29777	2.35595	0.897379
00000008_1.tif	CX7389	Control	10.497	6.404	4.87001	7.75372	2.88371	1	0.29777	2.30882	0.850695
00000008_1.tif	CX7389	Control	18.919	6.411	4.87001	6.3337	1.46369	1	0.29777	1.88599	0.43179
00000008_1.tif	CX7389	Control	22.611	6.501	4.87001	8.66673	3.79672	1	0.29777	2.58069	1.12003
00000008_1.tif	CX7389	Control	9.086	6.517	4.87001	8.72278	3.85277	1	0.29777	2.59738	1.13657
00000008_1.tif	CX7389	Control	9.295	6.532	4.87001	8.55117	3.68117	1	0.29777	2.54628	1.08594
00000008_1.tif	CX7389	Control	21.614	6.709	4.87001	7.77644	2.90643	1	0.29777	2.31559	0.857397
00000008_1.tif	CX7389	Control	21.742	6.733	4.87001	7.85508	2.98507	1	0.29777	2.33901	0.880597
00000008_1.tif	CX7389	Control	10.237	7.114	4.87001	7.45569	2.58568	1	0.29777	2.22008	0.762777
00000008_1.tif	CX7389	Control	10.684	7.186	4.87001	7.07374	2.20373	1	0.29777	2.10635	0.650102
00000008_1.tif	CX7389	Control	19.578	7.182	4.87001	6.04626	1.17625	1	0.29777	1.80039	0.346994
00000008_1.tif	CX7389	Control	10.586	7.231	4.87001	7.11611	2.24611	1	0.29777	2.11897	0.662602
00000008_1.tif	CX7389	Control	21.226	7.354	4.87001	7.05738	2.18738	1	0.29777	2.10148	0.645276
00000008_1.tif	CX7389	Control	11.094	7.38	4.87001	6.64199	1.77199	1	0.29777	1.97779	0.522736
00000008_1.tif	CX7389	Control	10.682	7.449	4.87001	6.89995	2.02994	1	0.29777	2.0546	0.598834
00000008_1.tif	CX7389	Control	20.424	7.435	4.87001	6.41487	1.54487	1	0.29777	1.91016	0.455736
00000008_1.tif	CX7389	Control	17.295	7.515	4.87001	4.67482	-0.19519	0	0.29777	1.39202	-0.0575811
00000008_1.tif	CX7389	Control	7.655	7.594	4.87001	9.32824	4.45824	1	0.29777	2.77767	1.31518
00000008_1.tif	CX7389	Control	10.615	7.633	4.87001	6.83231	1.9623	1	0.29777	2.03446	0.57888
00000008_1.tif	CX7389	Control	17.245	7.72	4.87001	4.46428	-0.405721	0	0.29777	1.32933	-0.119688
00000008_1.tif	CX7389	Control	22.802	7.734	4.87001	8.10799	3.23799	1	0.29777	2.41432	0.955206
00000008_1.tif	CX7389	Control	15.14	7.908	4.87001	4.13477	-0.735231	0	0.29777	1.23121	-0.216893
00000008_1.tif	CX7389	Control	16.806	7.94	4.87001	4.13647	-0.733536	0	0.29777	1.23172	-0.216393
00000008_1.tif	CX7389	Control	10.73	8.004	4.87001	6.51128	1.64128	1	0.29777	1.93887	0.484177
00000008_1.tif	CX7389	Control	19.618	7.987	4.87001	5.45772	0.587714	1	0.29777	1.62515	0.173376
00000008_1.tif	CX7389	Control	8.219	8.106	4.87001	8.59192	3.72191	1	0.29777	2.55841	1.09796
00000008_1.tif	CX7389	Control	14.598	8.257	4.87001	3.93547	-0.934534	0	0.29777	1.17187	-0.275687
00000008_1.tif	CX7389	Control	19.075	8.35	4.87001	4.82403	-0.0459787	0	0.29777	1.43645	-0.0135637
00000008_1.tif	CX7389	Control	10.426	8.429	4.87001	6.51408	1.64408	1	0.29777	1.9397	0.485002
00000008_1.tif	CX7389	Control	14.642	8.395	4.87001	3.79068	-1.07933	0	0.29777	1.12875	-0.318401
00000008_1.tif	CX7389	Control	12.648	8.439	4.87001	4.79722	-0.07279	0	0.29777	1.42847	-0.0214731
00000008_1.tif	CX7389	Control	21.499	8.504	4.87001	6.59474	1.72473	1	0.29777	1.96372	0.508796
00000008_1.tif	CX7389	Control	18.994	8.622	4.87001	4.56777	-0.302236	0	0.29777	1.36014	-0.0891597
00000008_1.tif	CX7389	Control	21.411	8.649	4.87001	6.44407	1.57406	1	0.29777	1.91885	0.464349
00000008_1.tif	CX7389	Control	10.409	8.695	4.87001	6.38781	1.51781	1	0.29777	1.9021	0.447754
00000008_1.tif	CX7389	Control	18.903	8.878	4.87001	4.31942	-0.550589	0	0.29777	1.28619	-0.162424
00000008_1.tif	CX7389	Control	14.789	8.93	4.87001	3.23734	-1.63267	0	0.29777	0.963981	-0.481638
00000008_1.tif	CX7389	Control	11.552	8.985	4.87001	5.26887	0.39887	1	0.29777	1.56891	0.117667
00000008_1.tif	CX7389	Control	19.379	9.018	4.87001	4.5721	-0.297907	0	0.29777	1.36143	-0.0878826
00000008_1.tif	CX7389	Control	18.895	9.168	4.87001	4.11068	-0.75933	0	0.29777	1.22404	-0.224002
00000008_1.tif	CX7389	Control	10.955	9.184	4.87001	5.66994	0.799933	1	0.29777	1.68834	0.23598
00000008_1.tif	CX7389	Control	7.15	9.276	4.87001	9.14791	4.27791	1	0.29777	2.72397	1.26198
00000008_1.tif	CX7389	Control	19.022	9.314	4.87001	4.10838	-0.761628	0	0.29777	1.22335	-0.22468
00000008_1.tif	CX7389	Control	10.273	9.405	4.87001	6.17751	1.30751	1	0.29777	1.83948	0.385715
00000008_1.tif	CX7389	Control	10.45	9.516	4.87001	5.97045	1.10044	1	0.29777	1.77782	0.32463
00000008_1.tif	CX7389	Control	9.98	9.53	4.87001	6.39633	1.52633	1	0.29777	1.90464	0.450266
00000008_1.tif	CX7389	Control	9.167	10.025	4.87001	7.00077	2.13076	1	0.29777	2.08462	0.628576
00000008_1.tif	CX7389	Control	5.92	10.079	4.87001	10.1495	5.27947	1	0.29777	3.02221	1.55744
00000008_1.tif	CX7389	Control	20.063	10.123	4.87001	4.56419	-0.30582	0	0.29777	1.35908	-0.090217
00000008_1.tif	CX7389	Control	9.224	10.251	4.87001	6.88605	2.01604	1	0.29777	2.05046	0.594732
00000008_1.tif	CX7389	Control	18.817	10.261	4.87001	3.39055	-1.47945	0	0.29777	1.0096	-0.436439
00000008_1.tif	CX7389	Control	13.299	10.293	4.87001	3.08937	-1.78063	0	0.29777	0.919923	-0.525287
00000008_1.tif	CX7389	Control	23.126	10.27	4.87001	7.43296	2.56295	1	0.29777	2.21331	0.756071
00000008_1.tif	CX7389	Control	13.15	10.272	4.87001	3.22644	-1.64357	0	0.29777	0.960736	-0.484853
00000008_1.tif	CX7389	Control	9.277	10.303	4.87001	6.82182	1.95182	1	0.29777	2.03133	0.575786
00000008_1.tif	CX7389	Control	11.907	10.377	4.87001	4.29216	-0.577842	0	0.29777	1.27808	-0.170463
00000008_1.tif	CX7389	Control	9.148	10.391	4.87001	6.92632	2.05632	1	0.29777	2.06245	0.606613
00000008_1.tif	CX7389	Control	13.211	10.376	4.87001	3.12026	-1.74975	0	0.29777	0.929119	-0.516176
00000008_1.tif	CX7389	Control	13.411	10.441	4.87001	2.91556	-1.95445	0	0.29777	0.868166	-0.576561
00000008_1.tif	CX7389	Control	11.643	10.402	4.87001	4.52954	-0.34047	0	0.29777	1.34876	-0.100439
00000008_1.tif	CX7389	Control	9.539	10.455	4.87001	6.5311	1.66109	1	0.29777	1.94477	0.490023
00000008_1.tif	CX7389	Control	8.993	10.497	4.87001	7.05436	2.18435	1	0.29777	2.10058	0.644383
00000008_1.tif	CX7389	Control	20.264	10.579	4.87001	4.59011	-0.27989	0	0.29777	1.3668	-0.0825677
00000008_1.tif	CX7389	Control	13.764	10.591	4.87001	2.53709	-2.33292	0	0.29777	0.755469	-0.68821
00000008_1.tif	CX7389	Control	24.693	10.591	4.87001	8.90999	4.03998	1	0.29777	2.65313	1.1918
00000008_1.tif	CX7389	Control	6.957	10.614	4.87001	9.03692	4.16692	1	0.29777	2.69092	1.22924
00000008_1.tif	CX7389	Control	14.589	10.634	4.87001	1.86837	-3.00164	0	0.29777	0.556344	-0.885483
00000008_1.tif	CX7389	Control	16.847	10.64	4.87001	1.64119	-3.22882	0	0.29777	0.488696	-0.952502
00000008_1.tif	CX7389	Control	5.971	10.633	4.87001	10.0102	5.14022	1	0.29777	2.98075	1.51637
00000008_1.tif	CX7389	Control	24.382	10.668	4.87001	8.59085	3.72085	1	0.29777	2.5581	1.09765
00000008_1.tif	CX7389	Control	20.135	10.729	4.87001	4.42285	-0.44716	0	0.29777	1.31699	-0.131912
00000008_1.tif	CX7389	Control	16.909	10.74	4.87001	1.59971	-3.27029	0	0.29777	0.476346	-0.964736
00000008_1.tif	CX7389	Control	8.538	10.796	4.87001	7.44676	2.57676	1	0.29777	2.21742	0.760144
00000008_1.tif	CX7389	Control	13.649	10.83	4.87001	2.517	-2.353	0	0.29777	0.749488	-0.694136
00000008_1.tif	CX7389	Control	13.627	10.929	4.87001	2.49354	-2.37647	0	0.29777	0.7425	-0.701058
00000008_1.tif	CX7389	Control	9.523	11.004	4.87001	6.44145	1.57145	1	0.29777	1.91807	0.463577
00000008_1.tif	CX7389	Control	17.542	10.957	4.87001	1.9391	-2.93091	0	0.29777	0.577404	-0.864618
00000008_1.tif	CX7389	Control	13.862	11.005	4.87001	2.24851	-2.62149	0	0.29777	0.669539	-0.773341
00000008_1.tif	CX7389	Control	13.514	10.99	4.87001	2.57262	-2.29738	0	0.29777	0.76605	-0.677728
00000008_1.tif	CX7389	Control	13.685	11.038	4.87001	2.39636	-2.47365	0	0.29777	0.713564	-0.729726
00000008_1.tif	CX7389	Control	18.025	11.207	4.87001	2.26765	-2.60235	0	0.29777	0.675239	-0.767694
00000008_1.tif	CX7389	Control	17.345	11.219	4.87001	1.63833	-3.23167	0	0.29777	0.487847	-0.953343
00000008_1.tif	CX7389	Control	18.9	11.229	4.87001	3.09986	-1.77015	0	0.29777	0.923044	-0.522194
00000008_1.tif	CX7389	Control	13.06	11.316	4.87001	2.90646	-1.96354	0	0.29777	0.865457	-0.579245
00000008_1.tif	CX7389	Control	12.432	11.447	4.87001	3.49892	-1.37109	0	0.29777	1.04187	-0.404471
00000008_1.tif	CX7389	Control	13.239	11.529	4.87001	2.68908	-2.18093	0	0.29777	0.800726	-0.643374
00000008_1.tif	CX7389	Control	8.709	11.843	4.87001	7.18319	2.31319	1	0.29777	2.13894	0.682391
00000008_1.tif	CX7389	Control	8.463	11.976	4.87001	7.428	2.558	1	0.29777	2.21184	0.754609
00000008_1.tif	CX7389	Control	18.744	12.178	4.87001	2.86028	-2.00972	0	0.29777	0.851707	-0.592868
00000008_1.tif	CX7389	Control	7.919	12.21	4.87001	7.97549	3.10549	1	0.29777	2.37486	0.916119
00000008_1.tif	CX7389	Control	13.812	12.356	4.87001	2.1138	-2.7562	0	0.29777	0.629427	-0.81308
00000008_1.tif	CX7389	Control	17.614	12.501	4.87001	1.80179	-3.06821	0	0.29777	0.53652	-0.905123
00000008_1.tif	CX7389	Control	7.615	12.504	4.87001	8.29295	3.42295	1	0.29777	2.46939	1.00977
00000008_1.tif	CX7389	Control	8.28	12.768	4.87001	7.6523	2.7823	1	0.29777	2.27863	0.820778
00000008_1.tif	CX7389	Control	13.955	13.149	4.87001	2.26467	-2.60534	0	0.29777	0.67435	-0.768575
00000008_1.tif	CX7389	Control	7.685	13.326	4.87001	8.31663	3.44663	1	0.29777	2.47644	1.01675
00000008_1.tif	CX7389	Control	7.84	13.509	4.87001	8.19603	3.32602	1	0.29777	2.44053	0.981176
00000008_1.tif	CX7389	Control	13.346	13.614	4.87001	3.02764	-1.84236	0	0.29777	0.901541	-0.543497
00000008_1.tif	CX7389	Control	13.239	13.592	4.87001	3.10661	-1.76339	0	0.29777	0.925055	-0.520201
00000008_1.tif	CX7389	Control	19.182	13.638	4.87001	3.68776	-1.18224	0	0.29777	1.0981	-0.348762
00000008_1.tif	CX7389	Control	13.18	13.712	4.87001	3.22027	-1.64973	0	0.29777	0.958901	-0.486671
00000008_1.tif	CX7389	Control	19.383	13.76	4.87001	3.92223	-0.947779	0	0.29777	1.16792	-0.279595
00000008_1.tif	CX7389	Control	17.922	13.734	4.87001	2.68748	-2.18252	0	0.29777	0.800252	-0.643844
00000008_1.tif	CX7389	Control	17.662	13.867	4.87001	2.59228	-2.27773	0	0.29777	0.771902	-0.67193
00000008_1.tif	CX7389	Control	17.389	13.908	4.87001	2.4463	-2.42371	0	0.29777	0.728433	-0.714994
00000008_1.tif	CX7389	Control	17.823	14.056	4.87001	2.84031	-2.0297	0	0.29777	0.845758	-0.598761
00000008_1.tif	CX7389	Control	19.382	14.135	4.87001	4.10573	-0.764277	0	0.29777	1.22256	-0.225462
00000008_1.tif	CX7389	Control	15.9	14.3	4.87001	2.32602	-2.54399	0	0.29777	0.692618	-0.750476
00000008_1.tif	CX7389	Control	15.772	14.321	4.87001	2.35001	-2.51999	0	0.29777	0.699764	-0.743397
00000008_1.tif	CX7389	Control	15.674	14.614	4.87001	2.6489	-2.2211	0	0.29777	0.788764	-0.655225
00000008_1.tif	CX7389	Control	16.002	14.634	4.87001	2.66231	-2.20769	0	0.29777	0.792758	-0.651269
00000008_1.tif	CX7389	Control	13.475	15.352	4.87001	4.15306	-0.716941	0	0.29777	1.23666	-0.211498
00000008_1.tif	CX7389	Control	13.157	15.505	4.87001	4.46573	-0.404278	0	0.29777	1.32976	-0.119262
00000008_1.tif	CX7389	Control	13.157	15.657	4.87001	4.58686	-0.28315	0	0.29777	1.36583	-0.0835291
00000008_1.tif	CX7389	Control	14.219	16.187	4.87001	4.53265	-0.337351	0	0.29777	1.34969	-0.0995186
00000008_1.tif	CX7389	Control	7.129	16.198	4.87001	9.72701	4.85701	1	0.29777	2.89641	1.43282
00000008_1.tif	CX7389	Control	6.986	16.402	4.87001	9.94516	5.07515	1	0.29777	2.96137	1.49717
00000008_1.tif	CX7389	Control	9.72	16.524	4.87001	7.66706	2.79705	1	0.29777	2.28302	0.82513
00000008_1.tif	CX7389	Control	14.291	16.553	4.87001	4.85049	-0.0195165	0	0.29777	1.44433	-0.00575738
00000008_1.tif	CX7389	Control	9.877	16.574	4.87001	7.57154	2.70153	1	0.29777	2.25458	0.796952
00000008_1.tif	CX7389	Control	15.166	16.94	4.87001	5.01864	0.148638	1	0.29777	1.4944	0.0438482
00000008_1.tif	CX7389	Control	17.232	17.153	4.87001	5.3498	0.479791	1	0.29777	1.59301	0.141538
00000008_1.tif	CX7389	Control	17.651	17.275	4.87001	5.58553	0.71553	1	0.29777	1.6632	0.211081
00000008_1.tif	CX7389	Control	20.171	18.526	4.87001	7.82605	2.95605	1	0.29777	2.33036	0.872034
00000008_1.tif	CX7389	Control	16.563	19.019	4.87001	7.07698	2.20697	1	0.29777	2.10731	0.651057
00000008_1.tif	CX7389	Control	14.649	19.039	4.87001	7.17334	2.30333	1	0.29777	2.13601	0.679483
00000008_1.tif	CX7389	Control	14.579	19.091	4.87001	7.23692	2.36692	1	0.29777	2.15494	0.69824
00000008_1.tif	CX7389	Control	12.491	19.228	4.87001	8.01127	3.14127	1	0.29777	2.38552	0.926674
00000008_1.tif	CX7389	Control	12.786	19.79	4.87001	8.41017	3.54016	1	0.29777	2.50429	1.04435
00000008_1.tif	CX7389	Control	16.229	20.534	4.87001	8.56667	3.69667	1	0.29777	2.5509	1.09052
00000008_1.tif	CX7389	Control	13.74	20.979	4.87001	9.25834	4.38833	1	0.29777	2.75686	1.29456
00000010_2.tif	CX7389	Control	9.118	6.198	5.06261	7.56745	2.50485	1	0.29777	2.25336	0.73893
00000010_2.tif	CX7389	Control	9.01	6.311	5.06261	7.54769	2.48508	1	0.29777	2.24747	0.733098
00000010_2.tif	CX7389	Control	10.702	6.541	5.06261	6.39701	1.3344	1	0.29777	1.90484	0.393648
00000010_2.tif	CX7389	Control	9.768	6.799	5.06261	6.69397	1.63137	1	0.29777	1.99326	0.481253
00000010_2.tif	CX7389	Control	9.27	6.999	5.06261	6.85607	1.79346	1	0.29777	2.04153	0.529071
00000010_2.tif	CX7389	Control	16.246	7.036	5.06261	5.63639	0.573779	1	0.29777	1.67835	0.169265
00000010_2.tif	CX7389	Control	9.684	7.084	5.06261	6.5225	1.45989	1	0.29777	1.9422	0.430668
00000010_2.tif	CX7389	Control	9.596	7.151	5.06261	6.5275	1.46489	1	0.29777	1.94369	0.432142
00000010_2.tif	CX7389	Control	16.866	7.225	5.06261	5.768	0.705395	1	0.29777	1.71754	0.208091
00000010_2.tif	CX7389	Control	15.978	7.344	5.06261	5.24423	0.181626	1	0.29777	1.56158	0.0535797
00000010_2.tif	CX7389	Control	13.242	7.39	5.06261	4.77051	-0.292095	0	0.29777	1.42052	-0.0861681
00000010_2.tif	CX7389	Control	8.969	7.419	5.06261	6.76075	1.69814	1	0.29777	2.01315	0.500952
00000010_2.tif	CX7389	Control	13.323	7.423	5.06261	4.72851	-0.334098	0	0.29777	1.40801	-0.0985588
00000010_2.tif	CX7389	Control	13.12	7.475	5.06261	4.70284	-0.359767	0	0.29777	1.40036	-0.106131
00000010_2.tif	CX7389	Control	14.792	7.503	5.06261	4.72248	-0.340124	0	0.29777	1.40621	-0.100337
00000010_2.tif	CX7389	Control	12.613	7.716	5.06261	4.57202	-0.490586	0	0.29777	1.36141	-0.144723
00000010_2.tif	CX7389	Control	12.493	7.74	5.06261	4.58226	-0.480345	0	0.29777	1.36446	-0.141702
00000010_2.tif	CX7389	Control	14.316	8.147	5.06261	4.00843	-1.05417	0	0.29777	1.19359	-0.310982
00000010_2.tif	CX7389	Control	16.4	8.343	5.06261	4.57651	-0.486096	0	0.29777	1.36275	-0.143398
00000010_2.tif	CX7389	Control	14.298	8.361	5.06261	3.79385	-1.26875	0	0.29777	1.1297	-0.374283
00000010_2.tif	CX7389	Control	11.474	8.48	5.06261	4.33634	-0.72627	0	0.29777	1.29123	-0.21425
00000010_2.tif	CX7389	Control	11.513	8.679	5.06261	4.14862	-0.913991	0	0.29777	1.23533	-0.269627
00000010_2.tif	CX7389	Control	11.678	9	5.06261	3.79034	-1.27227	0	0.29777	1.12865	-0.37532
00000010_2.tif	CX7389	Control	16.88	9.033	5.06261	4.34807	-0.714537	0	0.29777	1.29472	-0.210789
00000010_2.tif	CX7389	Control	11.294	9.387	5.06261	3.72726	-1.33535	0	0.29777	1.10987	-0.393927
00000010_2.tif	CX7389	Control	11.272	9.65	5.06261	3.55432	-1.50828	0	0.29777	1.05837	-0.444943
00000010_2.tif	CX7389	Control	16.013	9.671	5.06261	3.28911	-1.7735	0	0.29777	0.979397	-0.523183
00000010_2.tif	CX7389	Control	16.955	9.734	5.06261	3.94034	-1.12226	0	0.29777	1.17332	-0.331068
00000010_2.tif	CX7389	Control	12.307	9.793	5.06261	2.78145	-2.28115	0	0.29777	0.828233	-0.672941
00000010_2.tif	CX7389	Control	16.807	9.81	5.06261	3.7767	-1.28591	0	0.29777	1.12459	-0.379342
00000010_2.tif	CX7389	Control	16.917	9.838	5.06261	3.84749	-1.21511	0	0.29777	1.14567	-0.358459
00000010_2.tif	CX7389	Control	16.868	9.96	5.06261	3.73621	-1.3264	0	0.29777	1.11253	-0.391288
00000010_2.tif	CX7389	Control	16.978	9.957	5.06261	3.82809	-1.23452	0	0.29777	1.13989	-0.364184
00000010_2.tif	CX7389	Control	14.653	10.089	5.06261	2.19868	-2.86393	0	0.29777	0.654701	-0.844858
00000010_2.tif	CX7389	Control	15.102	10.108	5.06261	2.38833	-2.67428	0	0.29777	0.711174	-0.788911
00000010_2.tif	CX7389	Control	15.253	10.11	5.06261	2.47086	-2.59175	0	0.29777	0.735747	-0.764567
00000010_2.tif	CX7389	Control	15.169	10.159	5.06261	2.38262	-2.67999	0	0.29777	0.709472	-0.790597
00000010_2.tif	CX7389	Control	17.629	10.223	5.06261	4.25479	-0.807817	0	0.29777	1.26695	-0.238306
00000010_2.tif	CX7389	Control	15.305	10.204	5.06261	2.42622	-2.63638	0	0.29777	0.722457	-0.777733
00000010_2.tif	CX7389	Control	14.952	10.251	5.06261	2.18781	-2.8748	0	0.29777	0.651464	-0.848065
00000010_2.tif	CX7389	Control	16.409	10.31	5.06261	3.15937	-1.90324	0	0.29777	0.940766	-0.561455
00000010_2.tif	CX7389	Control	11.582	10.366	5.06261	2.84889	-2.21372	0	0.29777	0.848313	-0.653047
00000010_2.tif	CX7389	Control	15.225	10.366	5.06261	2.24937	-2.81323	0	0.29777	0.669796	-0.829904
00000010_2.tif	CX7389	Control	3.876	10.46	5.06261	10.0854	5.02278	1	0.29777	3.00313	1.48172
00000010_2.tif	CX7389	Control	11.175	10.636	5.06261	3.03793	-2.02468	0	0.29777	0.904605	-0.59728
00000010_2.tif	CX7389	Control	12.955	10.666	5.06261	1.69768	-3.36493	0	0.29777	0.505517	-0.992655
00000010_2.tif	CX7389	Control	12.879	10.74	5.06261	1.67611	-3.38649	0	0.29777	0.499097	-0.999015
00000010_2.tif	CX7389	Control	17.33	10.733	5.06261	3.77316	-1.28945	0	0.29777	1.12353	-0.380388
00000010_2.tif	CX7389	Control	10.856	10.94	5.06261	3.19489	-1.86772	0	0.29777	0.951342	-0.550977
00000010_2.tif	CX7389	Control	9.173	10.998	5.06261	4.78462	-0.277983	0	0.29777	1.42472	-0.082005
00000010_2.tif	CX7389	Control	16.851	11.064	5.06261	3.20851	-1.8541	0	0.29777	0.955397	-0.54696
00000010_2.tif	CX7389	Control	11.116	11.094	5.06261	2.89669	-2.16592	0	0.29777	0.862547	-0.638946
00000010_2.tif	CX7389	Control	12.73	11.072	5.06261	1.51771	-3.54489	0	0.29777	0.45193	-1.04574
00000010_2.tif	CX7389	Control	12.778	11.095	5.06261	1.46728	-3.59532	0	0.29777	0.436913	-1.06062
00000010_2.tif	CX7389	Control	11.188	11.149	5.06261	2.80995	-2.25266	0	0.29777	0.836718	-0.664535
00000010_2.tif	CX7389	Control	16.968	11.227	5.06261	3.27069	-1.79191	0	0.29777	0.973914	-0.528615
00000010_2.tif	CX7389	Control	12.753	11.179	5.06261	1.42822	-3.63439	0	0.29777	0.425281	-1.07214
00000010_2.tif	CX7389	Control	12.695	11.197	5.06261	1.46067	-3.60193	0	0.29777	0.434945	-1.06257
00000010_2.tif	CX7389	Control	8.953	11.258	5.06261	4.94657	-0.116034	0	0.29777	1.47294	-0.03423
00000010_2.tif	CX7389	Control	16.546	11.403	5.06261	2.81709	-2.24551	0	0.29777	0.838846	-0.662427
00000010_2.tif	CX7389	Control	9.01	11.37	5.06261	4.87186	-0.19075	0	0.29777	1.45069	-0.0562713
00000010_2.tif	CX7389	Control	6.343	11.435	5.06261	7.51176	2.44915	1	0.29777	2.23678	0.722499
00000010_2.tif	CX7389	Control	16.95	11.524	5.06261	3.18423	-1.87838	0	0.29777	0.948169	-0.554121
00000010_2.tif	CX7389	Control	8.97	11.541	5.06261	4.88801	-0.174595	0	0.29777	1.4555	-0.0515055
00000010_2.tif	CX7389	Control	16.476	11.643	5.06261	2.69643	-2.36618	0	0.29777	0.802916	-0.698022
00000010_2.tif	CX7389	Control	16.556	11.737	5.06261	2.7604	-2.3022	0	0.29777	0.821966	-0.67915
00000010_2.tif	CX7389	Control	10.776	11.754	5.06261	3.0695	-1.9931	0	0.29777	0.914006	-0.587966
00000010_2.tif	CX7389	Control	10.18	11.873	5.06261	3.65171	-1.4109	0	0.29777	1.08737	-0.416216
00000010_2.tif	CX7389	Control	17.308	11.979	5.06261	3.48806	-1.57455	0	0.29777	1.03864	-0.464492
00000010_2.tif	CX7389	Control	18.888	12.039	5.06261	5.06573	0.00312265	1	0.29777	1.50842	0.000921182
00000010_2.tif	CX7389	Control	11.635	12.054	5.06261	2.18915	-2.87346	0	0.29777	0.651864	-0.847669
00000010_2.tif	CX7389	Control	10.392	12.119	5.06261	3.43101	-1.6316	0	0.29777	1.02165	-0.481323
00000010_2.tif	CX7389	Control	11.328	12.208	5.06261	2.49638	-2.56623	0	0.29777	0.743347	-0.757037
00000010_2.tif	CX7389	Control	18.808	12.207	5.06261	4.98567	-0.076933	0	0.29777	1.48458	-0.0226952
00000010_2.tif	CX7389	Control	11.469	12.352	5.06261	2.36492	-2.69769	0	0.29777	0.704202	-0.795818
00000010_2.tif	CX7389	Control	10.88	12.42	5.06261	2.95775	-2.10486	0	0.29777	0.880729	-0.620933
00000010_2.tif	CX7389	Control	11.392	12.404	5.06261	2.44696	-2.61565	0	0.29777	0.728631	-0.771617
00000010_2.tif	CX7389	Control	17.068	12.497	5.06261	3.26625	-1.79635	0	0.29777	0.972592	-0.529925
00000010_2.tif	CX7389	Control	14.55	12.502	5.06261	0.818937	-4.24367	0	0.29777	0.243855	-1.25188
00000010_2.tif	CX7389	Control	16.511	12.52	5.06261	2.71687	-2.34574	0	0.29777	0.809002	-0.691993
00000010_2.tif	CX7389	Control	16.442	12.541	5.06261	2.65183	-2.41077	0	0.29777	0.789636	-0.711179
00000010_2.tif	CX7389	Control	14.613	12.559	5.06261	0.901363	-4.16124	0	0.29777	0.268399	-1.22757
00000010_2.tif	CX7389	Control	12.046	12.637	5.06261	1.84929	-3.21332	0	0.29777	0.550663	-0.947929
00000010_2.tif	CX7389	Control	12.208	12.672	5.06261	1.70512	-3.35749	0	0.29777	0.507734	-0.990459
00000010_2.tif	CX7389	Control	16.195	12.782	5.06261	2.46131	-2.6013	0	0.29777	0.732903	-0.767384
00000010_2.tif	CX7389	Control	12.824	12.801	5.06261	1.20622	-3.85638	0	0.29777	0.359177	-1.13763
00000010_2.tif	CX7389	Control	12.715	12.839	5.06261	1.31813	-3.74448	0	0.29777	0.392499	-1.10462
00000010_2.tif	CX7389	Control	15.973	12.858	5.06261	2.27152	-2.79109	0	0.29777	0.67639	-0.823372
00000010_2.tif	CX7389	Control	16.473	13.203	5.06261	2.86087	-2.20174	0	0.29777	0.851882	-0.649512
00000010_2.tif	CX7389	Control	17.48	13.341	5.06261	3.85387	-1.20874	0	0.29777	1.14757	-0.356578
00000010_2.tif	CX7389	Control	16.003	13.634	5.06261	2.65132	-2.41129	0	0.29777	0.789483	-0.711331
00000010_2.tif	CX7389	Control	18.912	13.988	5.06261	5.41929	0.356681	1	0.29777	1.6137	0.105221
00000010_2.tif	CX7389	Control	11.819	14.169	5.06261	2.86251	-2.2001	0	0.29777	0.852369	-0.649029
00000010_2.tif	CX7389	Control	11.931	14.149	5.06261	2.7706	-2.292	0	0.29777	0.825002	-0.676141
00000010_2.tif	CX7389	Control	11.891	14.21	5.06261	2.84251	-2.2201	0	0.29777	0.846413	-0.654929
00000010_2.tif	CX7389	Control	18.743	14.338	5.06261	5.39479	0.332184	1	0.29777	1.60641	0.0979941
00000010_2.tif	CX7389	Control	12.486	14.446	5.06261	2.67855	-2.38406	0	0.29777	0.797591	-0.703298
00000010_2.tif	CX7389	Control	16.043	14.534	5.06261	3.27592	-1.78668	0	0.29777	0.975472	-0.527071
00000010_2.tif	CX7389	Control	15.979	14.567	5.06261	3.25756	-1.80505	0	0.29777	0.970004	-0.532489
00000010_2.tif	CX7389	Control	12.464	14.76	5.06261	2.96481	-2.0978	0	0.29777	0.882832	-0.61885
00000010_2.tif	CX7389	Control	6.542	14.784	5.06261	7.75134	2.68873	1	0.29777	2.30812	0.793176
00000010_2.tif	CX7389	Control	6.639	14.914	5.06261	7.70639	2.64378	1	0.29777	2.29473	0.779915
00000010_2.tif	CX7389	Control	12.61	14.967	5.06261	3.09004	-1.97257	0	0.29777	0.920121	-0.581908
00000010_2.tif	CX7389	Control	12.651	15.076	5.06261	3.17521	-1.88739	0	0.29777	0.945484	-0.556781
00000010_2.tif	CX7389	Control	11.983	15.112	5.06261	3.50824	-1.55436	0	0.29777	1.04465	-0.458537
00000010_2.tif	CX7389	Control	12.766	15.133	5.06261	3.18831	-1.8743	0	0.29777	0.949383	-0.552918
00000010_2.tif	CX7389	Control	12.293	15.355	5.06261	3.57405	-1.48856	0	0.29777	1.06424	-0.439126
00000010_2.tif	CX7389	Control	14.427	15.546	5.06261	3.47391	-1.5887	0	0.29777	1.03443	-0.468665
00000010_2.tif	CX7389	Control	16.026	15.656	5.06261	4.16187	-0.900736	0	0.29777	1.23928	-0.265717
00000010_2.tif	CX7389	Control	13.57	15.947	5.06261	3.83036	-1.23224	0	0.29777	1.14057	-0.363512
00000010_2.tif	CX7389	Control	12.057	16.006	5.06261	4.26391	-0.798699	0	0.29777	1.26966	-0.235616
00000010_2.tif	CX7389	Control	11.57	16.135	5.06261	4.59958	-0.46303	0	0.29777	1.36962	-0.136594
00000010_2.tif	CX7389	Control	15.324	16.151	5.06261	4.29671	-0.765902	0	0.29777	1.27943	-0.225941
00000010_2.tif	CX7389	Control	11.431	16.207	5.06261	4.73121	-0.331393	0	0.29777	1.40881	-0.097761
00000010_2.tif	CX7389	Control	18.18	16.242	5.06261	5.99443	0.931818	1	0.29777	1.78496	0.274886
00000010_2.tif	CX7389	Control	18.312	16.274	5.06261	6.11272	1.05011	1	0.29777	1.82018	0.309783
00000010_2.tif	CX7389	Control	12.114	16.295	5.06261	4.50662	-0.555992	0	0.29777	1.34193	-0.164018
00000010_2.tif	CX7389	Control	16.311	16.44	5.06261	4.9809	-0.081707	0	0.29777	1.48316	-0.0241036
00000010_2.tif	CX7389	Control	10.539	16.524	5.06261	5.48961	0.427006	1	0.29777	1.63464	0.125967
00000010_2.tif	CX7389	Control	13.025	16.557	5.06261	4.50327	-0.559339	0	0.29777	1.34094	-0.165005
00000010_2.tif	CX7389	Control	10.387	16.645	5.06261	5.67772	0.615112	1	0.29777	1.69065	0.181458
00000010_2.tif	CX7389	Control	11.886	16.787	5.06261	5.04839	-0.0142202	0	0.29777	1.50326	-0.00419497
00000010_2.tif	CX7389	Control	14.262	16.949	5.06261	4.84393	-0.218673	0	0.29777	1.44238	-0.0645086
00000010_2.tif	CX7389	Control	9.865	16.939	5.06261	6.2322	1.1696	1	0.29777	1.85576	0.345031
00000010_2.tif	CX7389	Control	13.044	16.99	5.06261	4.92697	-0.135634	0	0.29777	1.4671	-0.0400121
00000010_2.tif	CX7389	Control	14.91	17.174	5.06261	5.16468	0.102077	1	0.29777	1.53789	0.0301129
00000010_2.tif	CX7389	Control	14.592	17.155	5.06261	5.08844	0.0258365	1	0.29777	1.51519	0.00762176
00000010_2.tif	CX7389	Control	14.649	17.212	5.06261	5.15362	0.091017	1	0.29777	1.53459	0.02685
00000010_2.tif	CX7389	Control	14.538	17.224	5.06261	5.14889	0.0862785	1	0.29777	1.53318	0.0254522
00000010_2.tif	CX7389	Control	14.458	17.26	5.06261	5.17411	0.111506	1	0.29777	1.5407	0.0328943
00000010_2.tif	CX7389	Control	19.567	17.275	5.06261	7.71466	2.65206	1	0.29777	2.2972	0.782357
00000010_2.tif	CX7389	Control	18.855	17.312	5.06261	7.22676	2.16415	1	0.29777	2.15191	0.638424
00000010_2.tif	CX7389	Control	18.716	17.363	5.06261	7.16785	2.10524	1	0.29777	2.13437	0.621047
00000010_2.tif	CX7389	Control	13.834	17.355	5.06261	5.23001	0.167404	1	0.29777	1.55734	0.0493842
00000010_2.tif	CX7389	Control	10.228	17.419	5.06261	6.39925	1.33665	1	0.29777	1.90551	0.394311
00000010_2.tif	CX7389	Control	17.391	17.676	5.06261	6.5988	1.5362	1	0.29777	1.96493	0.453178
00000010_2.tif	CX7389	Control	10.27	17.644	5.06261	6.56378	1.50117	1	0.29777	1.9545	0.442845
00000010_2.tif	CX7389	Control	10.372	17.669	5.06261	6.53034	1.46773	1	0.29777	1.94454	0.432981
00000010_2.tif	CX7389	Control	19.373	17.804	5.06261	7.94063	2.87802	1	0.29777	2.36448	0.849015
00000010_2.tif	CX7389	Control	13.9	17.818	5.06261	5.69352	0.630913	1	0.29777	1.69536	0.186119
00000010_2.tif	CX7389	Control	17.518	17.808	5.06261	6.77861	1.716	1	0.29777	2.01847	0.50622
00000010_2.tif	CX7389	Control	10.106	17.852	5.06261	6.82749	1.76488	1	0.29777	2.03302	0.52064
00000010_2.tif	CX7389	Control	17.452	17.868	5.06261	6.7935	1.7309	1	0.29777	2.0229	0.510614
00000010_2.tif	CX7389	Control	13.931	17.955	5.06261	5.831	0.768393	1	0.29777	1.7363	0.226676
00000010_2.tif	CX7389	Control	11.929	17.969	5.06261	6.14325	1.08065	1	0.29777	1.82928	0.318791
00000010_2.tif	CX7389	Control	8.318	18.036	5.06261	8.07743	3.01483	1	0.29777	2.40522	0.889374
00000010_2.tif	CX7389	Control	12.768	18.192	5.06261	6.15804	1.09544	1	0.29777	1.83368	0.323154
00000010_2.tif	CX7389	Control	11.056	18.298	5.06261	6.76478	1.70217	1	0.29777	2.01435	0.50214
00000010_2.tif	CX7389	Control	13.61	18.354	5.06261	6.23264	1.17003	1	0.29777	1.85589	0.34516
00000010_2.tif	CX7389	Control	15.338	18.373	5.06261	6.42905	1.36645	1	0.29777	1.91438	0.403102
00000010_2.tif	CX7389	Control	15.277	18.472	5.06261	6.51141	1.44881	1	0.29777	1.9389	0.427398
00000010_2.tif	CX7389	Control	11.101	18.467	5.06261	6.90147	1.83886	1	0.29777	2.05505	0.542464
00000010_2.tif	CX7389	Control	14.919	18.627	5.06261	6.59373	1.53112	1	0.29777	1.96341	0.45168
00000010_2.tif	CX7389	Control	15.04	18.785	5.06261	6.77028	1.70767	1	0.29777	2.01599	0.503763
00000010_2.tif	CX7389	Control	15.051	18.839	5.06261	6.82538	1.76277	1	0.29777	2.03239	0.520017
00000010_2.tif	CX7389	Control	15.2	18.892	5.06261	6.90568	1.84307	1	0.29777	2.0563	0.543706
00000010_2.tif	CX7389	Control	12.344	18.919	5.06261	6.95312	1.89051	1	0.29777	2.07043	0.557701
00000010_2.tif	CX7389	Control	14.004	18.962	5.06261	6.8394	1.77679	1	0.29777	2.03657	0.524152
00000010_2.tif	CX7389	Control	12.463	19.028	5.06261	7.0357	1.97309	1	0.29777	2.09502	0.582061
00000010_2.tif	CX7389	Control	14.661	19.097	5.06261	7.02218	1.95957	1	0.29777	2.09099	0.578074
00000010_2.tif	CX7389	Control	16.451	19.184	5.06261	7.53232	2.46971	1	0.29777	2.2429	0.728566
00000010_2.tif	CX7389	Control	15.95	19.299	5.06261	7.48267	2.42007	1	0.29777	2.22812	0.71392
00000010_2.tif	CX7389	Control	8.975	19.386	5.06261	8.73071	3.6681	1	0.29777	2.59974	1.08209
00000010_2.tif	CX7389	Control	17.369	19.498	5.06261	8.1814	3.11879	1	0.29777	2.43617	0.920043
00000010_2.tif	CX7389	Control	12.337	19.922	5.06261	7.93734	2.87474	1	0.29777	2.3635	0.848047
00000010_2.tif	CX7389	Control	15.179	19.935	5.06261	7.92684	2.86424	1	0.29777	2.36038	0.844949
00000010_2.tif	CX7389	Control	17.077	19.972	5.06261	8.49494	3.43233	1	0.29777	2.52954	1.01254
00000010_2.tif	CX7389	Control	17.216	19.981	5.06261	8.55741	3.4948	1	0.29777	2.54814	1.03097
00000010_2.tif	CX7389	Control	15.1	20.024	5.06261	8.00156	2.93895	1	0.29777	2.38262	0.86699
00000010_2.tif	CX7389	Control	11.301	20.082	5.06261	8.34712	3.28451	1	0.29777	2.48552	0.96893
00000010_2.tif	CX7389	Control	17.452	20.101	5.06261	8.76277	3.70017	1	0.29777	2.60929	1.09155
00000010_2.tif	CX7389	Control	11.399	20.174	5.06261	8.40608	3.34347	1	0.29777	2.50308	0.986324
00000010_2.tif	CX7389	Control	14.481	20.599	5.06261	8.49951	3.4369	1	0.29777	2.5309	1.01389
00000010_2.tif	CX7389	Control	14.359	20.696	5.06261	8.58774	3.52514	1	0.29777	2.55717	1.03992
00000004_2.tif	CX7389	Control	14.375	3.498	5.33346	8.05898	2.72552	1	0.29777	2.39972	0.804028
00000004_2.tif	CX7389	Control	14.384	3.61	5.33346	7.95128	2.61782	1	0.29777	2.36765	0.772258
00000004_2.tif	CX7389	Control	14.909	4.423	5.33346	7.29832	1.96487	1	0.29777	2.17322	0.579636
00000004_2.tif	CX7389	Control	13.954	5.183	5.33346	6.32377	0.99031	1	0.29777	1.88303	0.292141
00000004_2.tif	CX7389	Control	10.753	6.64	5.33346	5.13616	-0.197293	0	0.29777	1.5294	-0.0582014
00000004_2.tif	CX7389	Control	21.213	6.639	5.33346	9.72998	4.39653	1	0.29777	2.8973	1.29697
00000004_2.tif	CX7389	Control	21.093	6.868	5.33346	9.51458	4.18112	1	0.29777	2.83316	1.23343
00000004_2.tif	CX7389	Control	15.27	6.962	5.33346	5.10593	-0.227526	0	0.29777	1.52039	-0.0671202
00000004_2.tif	CX7389	Control	10.693	6.986	5.33346	4.84313	-0.49033	0	0.29777	1.44214	-0.144647
00000004_2.tif	CX7389	Control	10.761	7.263	5.33346	4.5634	-0.770054	0	0.29777	1.35884	-0.227166
00000004_2.tif	CX7389	Control	10.933	8.025	5.33346	3.80518	-1.52828	0	0.29777	1.13307	-0.450842
00000004_2.tif	CX7389	Control	13.553	8.017	5.33346	3.46972	-1.86373	0	0.29777	1.03318	-0.549801
00000004_2.tif	CX7389	Control	6.598	8.173	5.33346	6.91257	1.57911	1	0.29777	2.05836	0.465838
00000004_2.tif	CX7389	Control	10.69	8.222	5.33346	3.75785	-1.57561	0	0.29777	1.11897	-0.464805
00000004_2.tif	CX7389	Control	14.067	8.214	5.33346	3.44563	-1.88783	0	0.29777	1.026	-0.55691
00000004_2.tif	CX7389	Control	6.769	8.263	5.33346	6.71933	1.38587	1	0.29777	2.00081	0.408832
00000004_2.tif	CX7389	Control	15.273	8.299	5.33346	4.00578	-1.32767	0	0.29777	1.1928	-0.391663
00000004_2.tif	CX7389	Control	14.453	8.376	5.33346	3.47287	-1.86059	0	0.29777	1.03412	-0.548873
00000004_2.tif	CX7389	Control	12.553	8.659	5.33346	2.73105	-2.60241	0	0.29777	0.813225	-0.76771
00000004_2.tif	CX7389	Control	14.138	8.745	5.33346	2.99719	-2.33626	0	0.29777	0.892474	-0.689198
00000004_2.tif	CX7389	Control	15.306	8.786	5.33346	3.66707	-1.66639	0	0.29777	1.09194	-0.491585
00000004_2.tif	CX7389	Control	12.559	8.817	5.33346	2.57298	-2.76048	0	0.29777	0.766156	-0.814341
00000004_2.tif	CX7389	Control	13.375	8.813	5.33346	2.65434	-2.67912	0	0.29777	0.790383	-0.79034
00000004_2.tif	CX7389	Control	12.21	9.175	5.33346	2.26786	-3.0656	0	0.29777	0.6753	-0.904352
00000004_2.tif	CX7389	Control	14.261	9.286	5.33346	2.60453	-2.72893	0	0.29777	0.77555	-0.805034
00000004_2.tif	CX7389	Control	12.257	9.281	5.33346	2.15413	-3.17933	0	0.29777	0.641434	-0.937903
00000004_2.tif	CX7389	Control	12.628	9.593	5.33346	1.79431	-3.53915	0	0.29777	0.534291	-1.04405
00000004_2.tif	CX7389	Control	15.832	9.616	5.33346	3.58052	-1.75294	0	0.29777	1.06617	-0.517116
00000004_2.tif	CX7389	Control	13.379	9.759	5.33346	1.75484	-3.57861	0	0.29777	0.52254	-1.05569
00000004_2.tif	CX7389	Control	13.712	9.836	5.33346	1.83996	-3.4935	0	0.29777	0.547885	-1.03058
00000004_2.tif	CX7389	Control	14.829	10.042	5.33346	2.50115	-2.83231	0	0.29777	0.744767	-0.835531
00000004_2.tif	CX7389	Control	7.765	10.085	5.33346	5.12173	-0.211727	0	0.29777	1.5251	-0.0624595
00000004_2.tif	CX7389	Control	16.304	10.137	5.33346	3.79601	-1.53744	0	0.29777	1.13034	-0.453545
00000004_2.tif	CX7389	Control	14.884	10.198	5.33346	2.46905	-2.86441	0	0.29777	0.735208	-0.845001
00000004_2.tif	CX7389	Control	11.464	10.298	5.33346	1.6603	-3.67316	0	0.29777	0.494387	-1.08358
00000004_2.tif	CX7389	Control	16.372	10.369	5.33346	3.79166	-1.5418	0	0.29777	1.12904	-0.454831
00000004_2.tif	CX7389	Control	12.818	10.371	5.33346	1.01882	-4.31464	0	0.29777	0.303374	-1.27282
00000004_2.tif	CX7389	Control	8.145	10.465	5.33346	4.66561	-0.667851	0	0.29777	1.38928	-0.197016
00000004_2.tif	CX7389	Control	7.649	10.543	5.33346	5.13944	-0.194015	0	0.29777	1.53037	-0.0572344
00000004_2.tif	CX7389	Control	16.225	10.688	5.33346	3.57461	-1.75885	0	0.29777	1.06441	-0.51886
00000004_2.tif	CX7389	Control	11.341	10.886	5.33346	1.46557	-3.86789	0	0.29777	0.436402	-1.14103
00000004_2.tif	CX7389	Control	16.402	10.963	5.33346	3.7071	-1.62636	0	0.29777	1.10386	-0.479776
00000004_2.tif	CX7389	Control	17.725	10.994	5.33346	5.02125	-0.31221	0	0.29777	1.49518	-0.0921021
00000004_2.tif	CX7389	Control	17.541	11.18	5.33346	4.82636	-0.507101	0	0.29777	1.43714	-0.149595
00000004_2.tif	CX7389	Control	14.49	11.497	5.33346	1.77454	-3.55892	0	0.29777	0.528404	-1.04988
00000004_2.tif	CX7389	Control	13.762	11.501	5.33346	1.04943	-4.28403	0	0.29777	0.312489	-1.26379
00000004_2.tif	CX7389	Control	14.677	11.646	5.33346	1.97532	-3.35814	0	0.29777	0.588191	-0.990651
00000004_2.tif	CX7389	Control	11.507	11.745	5.33346	1.26434	-4.06912	0	0.29777	0.376481	-1.20039
00000004_2.tif	CX7389	Control	9.941	11.78	5.33346	2.80594	-2.52752	0	0.29777	0.835525	-0.745617
00000004_2.tif	CX7389	Control	11.282	11.853	5.33346	1.51129	-3.82217	0	0.29777	0.450016	-1.12754
00000004_2.tif	CX7389	Control	9.881	11.883	5.33346	2.88136	-2.45209	0	0.29777	0.857983	-0.723368
00000004_2.tif	CX7389	Control	9.768	11.985	5.33346	3.01138	-2.32208	0	0.29777	0.896698	-0.685013
00000004_2.tif	CX7389	Control	9.206	11.989	5.33346	3.56455	-1.76891	0	0.29777	1.06141	-0.521829
00000004_2.tif	CX7389	Control	12.427	12.099	5.33346	0.771401	-4.56206	0	0.29777	0.2297	-1.34581
00000004_2.tif	CX7389	Control	9.309	12.114	5.33346	3.48705	-1.8464	0	0.29777	1.03834	-0.544689
00000004_2.tif	CX7389	Control	19.586	12.147	5.33346	6.90915	1.57569	1	0.29777	2.05734	0.464829
00000004_2.tif	CX7389	Control	12.028	12.187	5.33346	1.05862	-4.27483	0	0.29777	0.315227	-1.26108
00000004_2.tif	CX7389	Control	8.961	12.185	5.33346	3.84221	-1.49125	0	0.29777	1.14409	-0.439918
00000004_2.tif	CX7389	Control	9.094	12.218	5.33346	3.71948	-1.61398	0	0.29777	1.10755	-0.476124
00000004_2.tif	CX7389	Control	12.135	12.276	5.33346	1.06533	-4.26812	0	0.29777	0.317225	-1.2591
00000004_2.tif	CX7389	Control	11.544	12.364	5.33346	1.5294	-3.80406	0	0.29777	0.45541	-1.1222
00000004_2.tif	CX7389	Control	12.49	12.426	5.33346	1.06589	-4.26757	0	0.29777	0.31739	-1.25893
00000004_2.tif	CX7389	Control	12.48	12.532	5.33346	1.17164	-4.16182	0	0.29777	0.348878	-1.22774
00000004_2.tif	CX7389	Control	19.807	12.644	5.33346	7.19895	1.86549	1	0.29777	2.14363	0.550319
00000004_2.tif	CX7389	Control	19.226	12.933	5.33346	6.6886	1.35514	1	0.29777	1.99166	0.399767
00000004_2.tif	CX7389	Control	13.845	13.01	5.33346	1.97699	-3.35646	0	0.29777	0.588689	-0.990157
00000004_2.tif	CX7389	Control	19.306	13.042	5.33346	6.79222	1.45876	1	0.29777	2.02252	0.430334
00000004_2.tif	CX7389	Control	13.978	13.097	5.33346	2.12509	-3.20836	0	0.29777	0.632789	-0.946467
00000004_2.tif	CX7389	Control	17.915	13.259	5.33346	5.52361	0.190155	1	0.29777	1.64477	0.0560958
00000004_2.tif	CX7389	Control	17.652	13.274	5.33346	5.28231	-0.0511459	0	0.29777	1.57291	-0.015088
00000004_2.tif	CX7389	Control	14.954	13.348	5.33346	2.97466	-2.3588	0	0.29777	0.885764	-0.695846
00000004_2.tif	CX7389	Control	11.95	13.977	5.33346	2.70367	-2.62979	0	0.29777	0.805071	-0.775788
00000004_2.tif	CX7389	Control	6.75	14.425	5.33346	6.69855	1.36509	1	0.29777	1.99463	0.402702
00000004_2.tif	CX7389	Control	9.933	14.603	5.33346	4.25644	-1.07701	0	0.29777	1.26744	-0.317719
00000004_2.tif	CX7389	Control	9.729	14.829	5.33346	4.56084	-0.77262	0	0.29777	1.35808	-0.227923
00000004_2.tif	CX7389	Control	9.95	15.038	5.33346	4.58386	-0.749597	0	0.29777	1.36494	-0.221131
00000004_2.tif	CX7389	Control	13.201	15.715	5.33346	4.35674	-0.976712	0	0.29777	1.29731	-0.28813
00000004_2.tif	CX7389	Control	15.687	15.773	5.33346	5.29751	-0.0359511	0	0.29777	1.57744	-0.0106056
00000004_2.tif	CX7389	Control	15.552	15.906	5.33346	5.33529	0.00183405	1	0.29777	1.58869	0.000541045
00000004_2.tif	CX7389	Control	15.655	15.927	5.33346	5.40831	0.074857	1	0.29777	1.61043	0.0220828
00000004_2.tif	CX7389	Control	16.784	16.166	5.33346	6.27552	0.942066	1	0.29777	1.86866	0.277909
00000004_2.tif	CX7389	Control	15.215	16.253	5.33346	5.4706	0.137141	1	0.29777	1.62898	0.0404565
00000004_2.tif	CX7389	Control	15.391	17.287	5.33346	6.47867	1.14521	1	0.29777	1.92915	0.337838
00000004_2.tif	CX7389	Control	15.852	17.35	5.33346	6.73772	1.40427	1	0.29777	2.00629	0.414259
00000004_2.tif	CX7389	Control	13.996	17.999	5.33346	6.73615	1.40269	1	0.29777	2.00582	0.413795
00000004_2.tif	CX7389	Control	14.228	18.044	5.33346	6.82784	1.49438	1	0.29777	2.03313	0.440842
00000007_1.tif	CX7389	Control	14.54	2.036	5.18757	9.11653	3.92896	1	0.29777	2.71463	1.15904
00000007_1.tif	CX7389	Control	14.611	2.188	5.18757	8.96219	3.77462	1	0.29777	2.66867	1.11351
00000007_1.tif	CX7389	Control	14.387	2.852	5.18757	8.30894	3.12137	1	0.29777	2.47415	0.920804
00000007_1.tif	CX7389	Control	14.378	3.005	5.18757	8.15677	2.9692	1	0.29777	2.42884	0.875915
00000007_1.tif	CX7389	Control	14.009	3.892	5.18757	7.3067	2.11913	1	0.29777	2.17572	0.625144
00000007_1.tif	CX7389	Control	14.258	3.997	5.18757	7.17644	1.98887	1	0.29777	2.13693	0.586718
00000007_1.tif	CX7389	Control	18.853	4.586	5.18757	7.66672	2.47915	1	0.29777	2.28292	0.73135
00000007_1.tif	CX7389	Control	19.027	4.761	5.18757	7.61081	2.42324	1	0.29777	2.26627	0.714855
00000007_1.tif	CX7389	Control	18.417	4.85	5.18757	7.21905	2.03148	1	0.29777	2.14962	0.599286
00000007_1.tif	CX7389	Control	18.423	5.073	5.18757	7.02843	1.84086	1	0.29777	2.09285	0.543053
00000007_1.tif	CX7389	Control	15.153	5.123	5.18757	6.02896	0.84139	1	0.29777	1.79524	0.24821
00000007_1.tif	CX7389	Control	18.13	5.578	5.18757	6.44458	1.25701	1	0.29777	1.919	0.370819
00000007_1.tif	CX7389	Control	14.33	5.715	5.18757	5.45928	0.271715	1	0.29777	1.62561	0.080156
00000007_1.tif	CX7389	Control	18.111	5.708	5.18757	6.32289	1.13532	1	0.29777	1.88277	0.334919
00000007_1.tif	CX7389	Control	14.169	5.821	5.18757	5.37292	0.185352	1	0.29777	1.59989	0.0546788
00000007_1.tif	CX7389	Control	18.168	5.898	5.18757	6.19028	1.00271	1	0.29777	1.84328	0.2958
00000007_1.tif	CX7389	Control	18.184	5.959	5.18757	6.14722	0.959656	1	0.29777	1.83046	0.283098
00000007_1.tif	CX7389	Control	13.022	6.054	5.18757	5.42211	0.234537	1	0.29777	1.61454	0.0691884
00000007_1.tif	CX7389	Control	14.666	6.086	5.18757	5.06474	-0.122832	0	0.29777	1.50813	-0.0362355
00000007_1.tif	CX7389	Control	13.168	6.202	5.18757	5.23366	0.0460936	1	0.29777	1.55843	0.0135976
00000007_1.tif	CX7389	Control	13.011	6.572	5.18757	4.94301	-0.244559	0	0.29777	1.47188	-0.0721448
00000007_1.tif	CX7389	Control	13.128	6.579	5.18757	4.89332	-0.294253	0	0.29777	1.45708	-0.0868048
00000007_1.tif	CX7389	Control	20.224	6.655	5.18757	6.97668	1.78911	1	0.29777	2.07744	0.527786
00000007_1.tif	CX7389	Control	8.687	6.734	5.18757	7.60795	2.42038	1	0.29777	2.26542	0.714013
00000007_1.tif	CX7389	Control	12.993	6.867	5.18757	4.67862	-0.508947	0	0.29777	1.39315	-0.150139
00000007_1.tif	CX7389	Control	14.608	6.952	5.18757	4.20314	-0.984432	0	0.29777	1.25157	-0.290407
00000007_1.tif	CX7389	Control	14.497	7.182	5.18757	3.98294	-1.20463	0	0.29777	1.186	-0.355364
00000007_1.tif	CX7389	Control	20.088	7.209	5.18757	6.52466	1.33709	1	0.29777	1.94285	0.394442
00000007_1.tif	CX7389	Control	17.004	7.338	5.18757	4.35787	-0.8297	0	0.29777	1.29764	-0.244761
00000007_1.tif	CX7389	Control	17.915	7.395	5.18757	4.82192	-0.36565	0	0.29777	1.43582	-0.107867
00000007_1.tif	CX7389	Control	14.433	7.514	5.18757	3.66002	-1.52755	0	0.29777	1.08984	-0.450628
00000007_1.tif	CX7389	Control	17.992	7.475	5.18757	4.80933	-0.378235	0	0.29777	1.43208	-0.111579
00000007_1.tif	CX7389	Control	14.778	7.49	5.18757	3.65757	-1.53	0	0.29777	1.08911	-0.451351
00000007_1.tif	CX7389	Control	17.783	7.575	5.18757	4.59896	-0.588608	0	0.29777	1.36943	-0.173639
00000007_1.tif	CX7389	Control	18.39	7.674	5.18757	4.93354	-0.25403	0	0.29777	1.46906	-0.0749388
00000007_1.tif	CX7389	Control	17.878	7.77	5.18757	4.5117	-0.67587	0	0.29777	1.34345	-0.199382
00000007_1.tif	CX7389	Control	14.384	7.836	5.18757	3.3477	-1.83987	0	0.29777	0.996845	-0.542761
00000007_1.tif	CX7389	Control	15.933	8.065	5.18757	3.25436	-1.93321	0	0.29777	0.969051	-0.570296
00000007_1.tif	CX7389	Control	14.539	8.069	5.18757	3.09639	-2.09118	0	0.29777	0.922013	-0.616897
00000007_1.tif	CX7389	Control	17.778	8.073	5.18757	4.22052	-0.96705	0	0.29777	1.25674	-0.28528
00000007_1.tif	CX7389	Control	15.73	8.143	5.18757	3.11962	-2.06795	0	0.29777	0.928929	-0.610045
00000007_1.tif	CX7389	Control	14.396	8.163	5.18757	3.02281	-2.16475	0	0.29777	0.900104	-0.638602
00000007_1.tif	CX7389	Control	15.432	8.214	5.18757	2.98259	-2.20498	0	0.29777	0.888125	-0.650469
00000007_1.tif	CX7389	Control	9.456	8.427	5.18757	6.07182	0.884251	1	0.29777	1.80801	0.260854
00000007_1.tif	CX7389	Control	15.474	8.441	5.18757	2.76838	-2.41919	0	0.29777	0.824341	-0.71366
00000007_1.tif	CX7389	Control	15.417	8.458	5.18757	2.74014	-2.44743	0	0.29777	0.815932	-0.721992
00000007_1.tif	CX7389	Control	19.654	8.53	5.18757	5.43938	0.251807	1	0.29777	1.61968	0.0742832
00000007_1.tif	CX7389	Control	10.892	8.623	5.18757	4.7233	-0.464267	0	0.29777	1.40646	-0.136959
00000007_1.tif	CX7389	Control	15.438	8.649	5.18757	2.5575	-2.63007	0	0.29777	0.761547	-0.77587
00000007_1.tif	CX7389	Control	9.38	8.638	5.18757	6.04939	0.861818	1	0.29777	1.80133	0.254236
00000007_1.tif	CX7389	Control	10.91	8.725	5.18757	4.65423	-0.533338	0	0.29777	1.38589	-0.157335
00000007_1.tif	CX7389	Control	15.634	8.829	5.18757	2.43505	-2.75251	0	0.29777	0.725086	-0.811992
00000007_1.tif	CX7389	Control	15.348	8.994	5.18757	2.20124	-2.98633	0	0.29777	0.655464	-0.880966
00000007_1.tif	CX7389	Control	19.042	9.324	5.18757	4.53876	-0.64881	0	0.29777	1.35151	-0.191399
00000007_1.tif	CX7389	Control	18.919	9.339	5.18757	4.42023	-0.767342	0	0.29777	1.31621	-0.226366
00000007_1.tif	CX7389	Control	15.584	9.328	5.18757	1.94775	-3.23982	0	0.29777	0.579981	-0.955747
00000007_1.tif	CX7389	Control	11.704	9.365	5.18757	3.64564	-1.54192	0	0.29777	1.08556	-0.454868
00000007_1.tif	CX7389	Control	14.664	9.34	5.18757	1.81947	-3.3681	0	0.29777	0.541784	-0.993589
00000007_1.tif	CX7389	Control	14.857	9.516	5.18757	1.63024	-3.55733	0	0.29777	0.485437	-1.04941
00000007_1.tif	CX7389	Control	14.118	9.614	5.18757	1.71328	-3.47429	0	0.29777	0.510162	-1.02492
00000007_1.tif	CX7389	Control	14.232	9.642	5.18757	1.63964	-3.54793	0	0.29777	0.488236	-1.04664
00000007_1.tif	CX7389	Control	16.417	9.726	5.18757	2.08888	-3.09869	0	0.29777	0.622006	-0.914113
00000007_1.tif	CX7389	Control	21.143	9.833	5.18757	6.39426	1.20669	1	0.29777	1.90402	0.355973
00000007_1.tif	CX7389	Control	12.505	9.915	5.18757	2.67951	-2.50806	0	0.29777	0.797877	-0.739878
00000007_1.tif	CX7389	Control	15.83	9.842	5.18757	1.61042	-3.57715	0	0.29777	0.479534	-1.05526
00000007_1.tif	CX7389	Control	17.125	9.938	5.18757	2.54497	-2.6426	0	0.29777	0.757815	-0.779567
00000007_1.tif	CX7389	Control	21.297	9.94	5.18757	6.52443	1.33686	1	0.29777	1.94278	0.394374
00000007_1.tif	CX7389	Control	14.749	9.945	5.18757	1.20868	-3.97889	0	0.29777	0.359907	-1.17377
00000007_1.tif	CX7389	Control	11.781	10.043	5.18757	3.29415	-1.89342	0	0.29777	0.980899	-0.558559
00000007_1.tif	CX7389	Control	12.117	10.054	5.18757	2.97562	-2.21195	0	0.29777	0.886049	-0.652526
00000007_1.tif	CX7389	Control	16.998	10.098	5.18757	2.35862	-2.82895	0	0.29777	0.702325	-0.834541
00000007_1.tif	CX7389	Control	12.17	10.137	5.18757	2.89643	-2.29114	0	0.29777	0.86247	-0.675886
00000007_1.tif	CX7389	Control	11.677	10.195	5.18757	3.34599	-1.84158	0	0.29777	0.996336	-0.543265
00000007_1.tif	CX7389	Control	16.287	10.19	5.18757	1.69692	-3.49065	0	0.29777	0.505292	-1.02974
00000007_1.tif	CX7389	Control	12.284	10.288	5.18757	2.73886	-2.44871	0	0.29777	0.815551	-0.722369
00000007_1.tif	CX7389	Control	9.582	10.305	5.18757	5.36927	0.181704	1	0.29777	1.59881	0.0536026
00000007_1.tif	CX7389	Control	13.885	10.357	5.18757	1.27378	-3.91379	0	0.29777	0.379294	-1.15457
00000007_1.tif	CX7389	Control	13.285	10.34	5.18757	1.79155	-3.39602	0	0.29777	0.533469	-1.00183
00000007_1.tif	CX7389	Control	12.486	10.491	5.18757	2.48681	-2.70076	0	0.29777	0.740498	-0.796724
00000007_1.tif	CX7389	Control	22.102	10.525	5.18757	7.24367	2.0561	1	0.29777	2.15695	0.606549
00000007_1.tif	CX7389	Control	16.313	10.53	5.18757	1.5552	-3.63237	0	0.29777	0.463091	-1.07155
00000007_1.tif	CX7389	Control	14.061	10.562	5.18757	1.00997	-4.1776	0	0.29777	0.300738	-1.23239
00000007_1.tif	CX7389	Control	19.239	10.606	5.18757	4.38736	-0.80021	0	0.29777	1.30642	-0.236062
00000007_1.tif	CX7389	Control	19.346	10.653	5.18757	4.48816	-0.69941	0	0.29777	1.33644	-0.206326
00000007_1.tif	CX7389	Control	22.109	10.718	5.18757	7.23667	2.0491	1	0.29777	2.15486	0.604484
00000007_1.tif	CX7389	Control	12.399	10.825	5.18757	2.50664	-2.68093	0	0.29777	0.746402	-0.790874
00000007_1.tif	CX7389	Control	10.569	10.839	5.18757	4.3269	-0.860664	0	0.29777	1.28842	-0.253896
00000007_1.tif	CX7389	Control	14.1	10.859	5.18757	0.835819	-4.35175	0	0.29777	0.248882	-1.28377
00000007_1.tif	CX7389	Control	10.757	10.893	5.18757	4.13575	-1.05182	0	0.29777	1.2315	-0.310288
00000007_1.tif	CX7389	Control	17.941	11.029	5.18757	3.05824	-2.12933	0	0.29777	0.910652	-0.628152
00000007_1.tif	CX7389	Control	18.06	11.027	5.18757	3.17723	-2.01034	0	0.29777	0.946084	-0.59305
00000007_1.tif	CX7389	Control	16.36	11.19	5.18757	1.47566	-3.71191	0	0.29777	0.439406	-1.09501
00000007_1.tif	CX7389	Control	16.187	11.404	5.18757	1.32732	-3.86025	0	0.29777	0.395235	-1.13877
00000007_1.tif	CX7389	Control	12.751	11.405	5.18757	2.14966	-3.03791	0	0.29777	0.640104	-0.896183
00000007_1.tif	CX7389	Control	12.448	11.504	5.18757	2.46316	-2.72441	0	0.29777	0.733454	-0.803702
00000007_1.tif	CX7389	Control	16.272	11.521	5.18757	1.4368	-3.75077	0	0.29777	0.427836	-1.10648
00000007_1.tif	CX7389	Control	12.816	11.527	5.18757	2.10379	-3.08378	0	0.29777	0.626445	-0.909716
00000007_1.tif	CX7389	Control	12.379	11.661	5.18757	2.55837	-2.6292	0	0.29777	0.761806	-0.775613
00000007_1.tif	CX7389	Control	17.759	11.784	5.18757	2.94396	-2.24361	0	0.29777	0.876624	-0.661864
00000007_1.tif	CX7389	Control	10.699	11.813	5.18757	4.23881	-0.948762	0	0.29777	1.26219	-0.279885
00000007_1.tif	CX7389	Control	12.304	11.809	5.18757	2.66479	-2.52277	0	0.29777	0.793496	-0.744218
00000007_1.tif	CX7389	Control	11.089	11.85	5.18757	3.86073	-1.32684	0	0.29777	1.14961	-0.391418
00000007_1.tif	CX7389	Control	13.886	11.919	5.18757	1.26314	-3.92443	0	0.29777	0.376126	-1.15771
00000007_1.tif	CX7389	Control	19.314	12.139	5.18757	4.53895	-0.648617	0	0.29777	1.35156	-0.191342
00000007_1.tif	CX7389	Control	19.498	12.175	5.18757	4.72637	-0.461195	0	0.29777	1.40737	-0.136053
00000007_1.tif	CX7389	Control	10.873	12.183	5.18757	4.14385	-1.04372	0	0.29777	1.23391	-0.307896
00000007_1.tif	CX7389	Control	19.161	12.19	5.18757	4.4016	-0.785966	0	0.29777	1.31067	-0.23186
00000007_1.tif	CX7389	Control	17.182	12.208	5.18757	2.53062	-2.65695	0	0.29777	0.753544	-0.783799
00000007_1.tif	CX7389	Control	11.81	12.283	5.18757	3.27847	-1.90909	0	0.29777	0.976231	-0.563183
00000007_1.tif	CX7389	Control	17.203	12.348	5.18757	2.61112	-2.57645	0	0.29777	0.777512	-0.760054
00000007_1.tif	CX7389	Control	16.559	12.427	5.18757	2.1079	-3.07967	0	0.29777	0.627669	-0.908503
00000007_1.tif	CX7389	Control	18.097	12.561	5.18757	3.50987	-1.6777	0	0.29777	1.04513	-0.494922
00000007_1.tif	CX7389	Control	12.757	12.523	5.18757	2.53466	-2.65291	0	0.29777	0.754746	-0.782607
00000007_1.tif	CX7389	Control	11.492	12.491	5.18757	3.64986	-1.53771	0	0.29777	1.08682	-0.453624
00000007_1.tif	CX7389	Control	10.566	12.631	5.18757	4.56716	-0.620405	0	0.29777	1.35996	-0.18302
00000007_1.tif	CX7389	Control	12.6	12.623	5.18757	2.7208	-2.46677	0	0.29777	0.810173	-0.727697
00000007_1.tif	CX7389	Control	10.541	12.681	5.18757	4.60723	-0.58034	0	0.29777	1.37189	-0.1712
00000007_1.tif	CX7389	Control	18.787	12.729	5.18757	4.21088	-0.976691	0	0.29777	1.25387	-0.288124
00000007_1.tif	CX7389	Control	15.488	12.73	5.18757	1.69489	-3.49268	0	0.29777	0.504689	-1.03034
00000007_1.tif	CX7389	Control	15.413	12.786	5.18757	1.7229	-3.46467	0	0.29777	0.513028	-1.02208
00000007_1.tif	CX7389	Control	16.437	12.843	5.18757	2.29968	-2.88789	0	0.29777	0.684775	-0.851928
00000007_1.tif	CX7389	Control	10.666	12.846	5.18757	4.54862	-0.638947	0	0.29777	1.35444	-0.188489
00000007_1.tif	CX7389	Control	15.836	12.838	5.18757	1.94094	-3.24662	0	0.29777	0.577955	-0.957754
00000007_1.tif	CX7389	Control	8.583	12.841	5.18757	6.52597	1.3384	1	0.29777	1.94324	0.394827
00000007_1.tif	CX7389	Control	8.416	12.876	5.18757	6.69633	1.50876	1	0.29777	1.99397	0.445085
00000007_1.tif	CX7389	Control	11.005	12.864	5.18757	4.24334	-0.94423	0	0.29777	1.26354	-0.278548
00000007_1.tif	CX7389	Control	15.298	12.948	5.18757	1.84872	-3.33885	0	0.29777	0.550494	-0.98496
00000007_1.tif	CX7389	Control	18.856	12.985	5.18757	4.37616	-0.811411	0	0.29777	1.30309	-0.239366
00000007_1.tif	CX7389	Control	10.803	13.002	5.18757	4.48413	-0.703435	0	0.29777	1.33524	-0.207513
00000007_1.tif	CX7389	Control	16.287	13.083	5.18757	2.39114	-2.79642	0	0.29777	0.712011	-0.824945
00000007_1.tif	CX7389	Control	10.978	13.087	5.18757	4.36258	-0.824986	0	0.29777	1.29905	-0.243371
00000007_1.tif	CX7389	Control	16.099	13.122	5.18757	2.31913	-2.86844	0	0.29777	0.690568	-0.846189
00000007_1.tif	CX7389	Control	16.044	13.279	5.18757	2.42754	-2.76003	0	0.29777	0.72285	-0.814207
00000007_1.tif	CX7389	Control	10.928	13.304	5.18757	4.5072	-0.680373	0	0.29777	1.34211	-0.20071
00000007_1.tif	CX7389	Control	11.225	13.36	5.18757	4.27755	-0.910023	0	0.29777	1.27372	-0.268457
00000007_1.tif	CX7389	Control	11.067	13.349	5.18757	4.40799	-0.779584	0	0.29777	1.31257	-0.229977
00000007_1.tif	CX7389	Control	11.442	13.372	5.18757	4.09992	-1.08765	0	0.29777	1.22083	-0.320857
00000007_1.tif	CX7389	Control	8.625	13.484	5.18757	6.68235	1.49478	1	0.29777	1.9898	0.440961
00000007_1.tif	CX7389	Control	10.695	13.505	5.18757	4.80843	-0.379141	0	0.29777	1.43181	-0.111847
00000007_1.tif	CX7389	Control	18.658	13.659	5.18757	4.53329	-0.654281	0	0.29777	1.34988	-0.193013
00000007_1.tif	CX7389	Control	14.716	13.951	5.18757	2.81009	-2.37748	0	0.29777	0.836759	-0.701357
00000007_1.tif	CX7389	Control	17.942	14.147	5.18757	4.28384	-0.903733	0	0.29777	1.2756	-0.266601
00000007_1.tif	CX7389	Control	17.249	14.179	5.18757	3.84546	-1.34211	0	0.29777	1.14506	-0.395921
00000007_1.tif	CX7389	Control	8.367	14.331	5.18757	7.25455	2.06698	1	0.29777	2.16019	0.60976
00000007_1.tif	CX7389	Control	16.019	14.4	5.18757	3.44594	-1.74163	0	0.29777	1.0261	-0.513782
00000007_1.tif	CX7389	Control	16.126	14.36	5.18757	3.44527	-1.7423	0	0.29777	1.0259	-0.513979
00000007_1.tif	CX7389	Control	8.315	14.421	5.18757	7.34102	2.15345	1	0.29777	2.18593	0.635267
00000007_1.tif	CX7389	Control	16.101	14.436	5.18757	3.50753	-1.68004	0	0.29777	1.04444	-0.495612
00000007_1.tif	CX7389	Control	13.094	14.496	5.18757	3.79871	-1.38886	0	0.29777	1.13114	-0.409714
00000007_1.tif	CX7389	Control	13.701	14.595	5.18757	3.64657	-1.541	0	0.29777	1.08584	-0.454595
00000007_1.tif	CX7389	Control	8.882	14.482	5.18757	6.86767	1.6801	1	0.29777	2.04499	0.49563
00000007_1.tif	CX7389	Control	13.562	14.574	5.18757	3.67444	-1.51313	0	0.29777	1.09414	-0.446373
00000007_1.tif	CX7389	Control	13.252	14.523	5.18757	3.75111	-1.43646	0	0.29777	1.11697	-0.423756
00000007_1.tif	CX7389	Control	13.419	14.612	5.18757	3.76328	-1.42428	0	0.29777	1.12059	-0.420164
00000007_1.tif	CX7389	Control	15.926	14.743	5.18757	3.74461	-1.44296	0	0.29777	1.11503	-0.425673
00000007_1.tif	CX7389	Control	12.015	14.747	5.18757	4.60479	-0.582778	0	0.29777	1.37117	-0.171919
00000007_1.tif	CX7389	Control	11.909	14.852	5.18757	4.753	-0.434569	0	0.29777	1.4153	-0.128198
00000007_1.tif	CX7389	Control	14.455	14.891	5.18757	3.76961	-1.41796	0	0.29777	1.12248	-0.418299
00000007_1.tif	CX7389	Control	13.828	14.929	5.18757	3.92789	-1.25968	0	0.29777	1.16961	-0.371605
00000007_1.tif	CX7389	Control	13.312	14.904	5.18757	4.07393	-1.11364	0	0.29777	1.21309	-0.328524
00000007_1.tif	CX7389	Control	15.358	14.923	5.18757	3.8065	-1.38107	0	0.29777	1.13346	-0.407415
00000007_1.tif	CX7389	Control	12.606	14.966	5.18757	4.44817	-0.739396	0	0.29777	1.32453	-0.218122
00000007_1.tif	CX7389	Control	10.253	15.03	5.18757	6.04491	0.857336	1	0.29777	1.79999	0.252914
00000007_1.tif	CX7389	Control	12.728	15.03	5.18757	4.44276	-0.74481	0	0.29777	1.32292	-0.219719
00000007_1.tif	CX7389	Control	15.166	15.085	5.18757	3.94901	-1.23856	0	0.29777	1.1759	-0.365375
00000007_1.tif	CX7389	Control	15.286	15.251	5.18757	4.12454	-1.06303	0	0.29777	1.22816	-0.313594
00000007_1.tif	CX7389	Control	15.49	15.359	5.18757	4.25622	-0.931351	0	0.29777	1.26737	-0.274748
00000007_1.tif	CX7389	Control	10.533	15.328	5.18757	6.03565	0.848077	1	0.29777	1.79723	0.250183
00000007_1.tif	CX7389	Control	17.678	15.353	5.18757	5.04972	-0.137846	0	0.29777	1.50366	-0.0406647
00000007_1.tif	CX7389	Control	15.712	15.512	5.18757	4.44363	-0.743935	0	0.29777	1.32318	-0.219461
00000007_1.tif	CX7389	Control	15.573	15.578	5.18757	4.48508	-0.702486	0	0.29777	1.33552	-0.207233
00000007_1.tif	CX7389	Control	10.506	15.61	5.18757	6.25323	1.06567	1	0.29777	1.86203	0.314371
00000007_1.tif	CX7389	Control	15.609	15.614	5.18757	4.52628	-0.66129	0	0.29777	1.34779	-0.195081
00000007_1.tif	CX7389	Control	11.471	15.648	5.18757	5.65008	0.462511	1	0.29777	1.68242	0.136441
00000007_1.tif	CX7389	Control	16.9	15.638	5.18757	4.92324	-0.264329	0	0.29777	1.46599	-0.0779772
00000007_1.tif	CX7389	Control	15.556	15.801	5.18757	4.70311	-0.484457	0	0.29777	1.40045	-0.142915
00000007_1.tif	CX7389	Control	11.627	15.733	5.18757	5.62629	0.43872	1	0.29777	1.67534	0.129423
00000007_1.tif	CX7389	Control	15.008	15.854	5.18757	4.70961	-0.477963	0	0.29777	1.40238	-0.140999
00000007_1.tif	CX7389	Control	16.464	15.974	5.18757	5.07965	-0.107921	0	0.29777	1.51257	-0.0318367
00000007_1.tif	CX7389	Control	16.592	16.07	5.18757	5.21149	0.0239207	1	0.29777	1.55183	0.00705659
00000007_1.tif	CX7389	Control	16.572	16.609	5.18757	5.71755	0.529977	1	0.29777	1.70251	0.156343
00000007_1.tif	CX7389	Control	16.441	16.615	5.18757	5.68604	0.498475	1	0.29777	1.69313	0.14705
00000007_1.tif	CX7389	Control	15.757	16.764	5.18757	5.68527	0.497702	1	0.29777	1.6929	0.146822
00000007_1.tif	CX7389	Control	14.545	16.899	5.18757	5.76304	0.575469	1	0.29777	1.71606	0.169763
00000007_1.tif	CX7389	Control	13.117	17.198	5.18757	6.30496	1.11739	1	0.29777	1.87743	0.329631
00000007_1.tif	CX7389	Control	18.218	18.205	5.18757	7.8063	2.61873	1	0.29777	2.32448	0.772527
00000007_1.tif	CX7389	Control	18.21	18.31	5.18757	7.89801	2.71044	1	0.29777	2.35179	0.799579
00000007_1.tif	CX7389	Control	12.554	18.762	5.18757	7.96474	2.77717	1	0.29777	2.37166	0.819264
00000007_1.tif	CX7389	Control	10.881	18.88	5.18757	8.70901	3.52144	1	0.29777	2.59328	1.03882
00000007_1.tif	CX7389	Control	12.665	18.861	5.18757	8.02805	2.84048	1	0.29777	2.39051	0.837943
00000004_2.tif	CX7389	Control	15.527	3.826	4.72931	7.85067	3.12136	1	0.29777	2.33769	0.920802
00000004_2.tif	CX7389	Control	15.15	4.731	4.72931	6.88332	2.15401	1	0.29777	2.04965	0.635434
00000004_2.tif	CX7389	Control	12.729	5.046	4.72931	6.46734	1.73803	1	0.29777	1.92578	0.512719
00000004_2.tif	CX7389	Control	12.602	5.117	4.72931	6.4165	1.68719	1	0.29777	1.91064	0.497722
00000004_2.tif	CX7389	Control	14.74	5.211	4.72931	6.33222	1.60291	1	0.29777	1.88555	0.472859
00000004_2.tif	CX7389	Control	15.057	5.264	4.72931	6.34293	1.61362	1	0.29777	1.88873	0.476019
00000004_2.tif	CX7389	Control	16.006	5.355	4.72931	6.53408	1.80477	1	0.29777	1.94565	0.532409
00000004_2.tif	CX7389	Control	16.759	5.498	4.72931	6.71515	1.98584	1	0.29777	1.99957	0.585824
00000004_2.tif	CX7389	Control	14.577	6.615	4.72931	4.92185	0.192545	1	0.29777	1.46558	0.0568009
00000004_2.tif	CX7389	Control	18.159	7.159	4.72931	6.22597	1.49666	1	0.29777	1.85391	0.441515
00000004_2.tif	CX7389	Control	13.358	7.175	4.72931	4.28269	-0.446614	0	0.29777	1.27526	-0.131751
00000004_2.tif	CX7389	Control	13.228	7.271	4.72931	4.19786	-0.531446	0	0.29777	1.25	-0.156777
00000004_2.tif	CX7389	Control	11.003	7.604	4.72931	4.66495	-0.064356	0	0.29777	1.38908	-0.018985
00000004_2.tif	CX7389	Control	10.952	7.768	4.72931	4.56071	-0.168603	0	0.29777	1.35804	-0.049738
00000004_2.tif	CX7389	Control	8.369	8.925	4.72931	5.84912	1.11982	1	0.29777	1.74169	0.330346
00000004_2.tif	CX7389	Control	8.201	9.034	4.72931	5.95612	1.22682	1	0.29777	1.77356	0.361911
00000004_2.tif	CX7389	Control	18.739	9.08	4.72931	5.61659	0.88728	1	0.29777	1.67245	0.261748
00000004_2.tif	CX7389	Control	18.57	9.132	4.72931	5.44147	0.712164	1	0.29777	1.62031	0.210089
00000004_2.tif	CX7389	Control	10.903	9.306	4.72931	3.48026	-1.24905	0	0.29777	1.03632	-0.368469
00000004_2.tif	CX7389	Control	8.645	9.49	4.72931	5.37064	0.64133	1	0.29777	1.59922	0.189192
00000004_2.tif	CX7389	Control	11.364	9.669	4.72931	2.8935	-1.8358	0	0.29777	0.861599	-0.541562
00000004_2.tif	CX7389	Control	15.676	9.727	4.72931	2.66134	-2.06797	0	0.29777	0.792468	-0.61005
00000004_2.tif	CX7389	Control	10.013	9.787	4.72931	3.9947	-0.734611	0	0.29777	1.1895	-0.21671
00000004_2.tif	CX7389	Control	14.499	10.059	4.72931	1.63001	-3.0993	0	0.29777	0.485368	-0.914293
00000004_2.tif	CX7389	Control	15.912	10.091	4.72931	2.64125	-2.08806	0	0.29777	0.786485	-0.615977
00000004_2.tif	CX7389	Control	15.558	10.234	4.72931	2.26485	-2.46446	0	0.29777	0.674404	-0.727016
00000004_2.tif	CX7389	Control	9.898	10.212	4.72931	3.94654	-0.782766	0	0.29777	1.17516	-0.230916
00000004_2.tif	CX7389	Control	14.174	10.36	4.72931	1.20935	-3.51996	0	0.29777	0.360108	-1.03839
00000004_2.tif	CX7389	Control	19.453	10.416	4.72931	5.89799	1.16868	1	0.29777	1.75624	0.344761
00000004_2.tif	CX7389	Control	14.927	10.442	4.72931	1.6288	-3.10051	0	0.29777	0.485008	-0.914649
00000004_2.tif	CX7389	Control	9.843	10.462	4.72931	3.92874	-0.800568	0	0.29777	1.16986	-0.236168
00000004_2.tif	CX7389	Control	18.557	10.687	4.72931	4.96961	0.240303	1	0.29777	1.4798	0.0708894
00000004_2.tif	CX7389	Control	13.292	10.918	4.72931	0.637351	-4.09196	0	0.29777	0.189784	-1.20713
00000004_2.tif	CX7389	Control	13.171	10.996	4.72931	0.65569	-4.07362	0	0.29777	0.195245	-1.20172
00000004_2.tif	CX7389	Control	17.452	11.077	4.72931	3.82404	-0.90527	0	0.29777	1.13868	-0.267055
00000004_2.tif	CX7389	Control	18.262	11.067	4.72931	4.6317	-0.0976119	0	0.29777	1.37918	-0.0287955
00000004_2.tif	CX7389	Control	13.053	11.337	4.72931	0.603299	-4.12601	0	0.29777	0.179644	-1.21717
00000004_2.tif	CX7389	Control	13.097	11.454	4.72931	0.549033	-4.18028	0	0.29777	0.163485	-1.23318
00000004_2.tif	CX7389	Control	13.057	11.522	4.72931	0.59363	-4.13568	0	0.29777	0.176765	-1.22003
00000004_2.tif	CX7389	Control	14.531	11.538	4.72931	0.889564	-3.83974	0	0.29777	0.264886	-1.13272
00000004_2.tif	CX7389	Control	11.937	11.758	4.72931	1.73689	-2.99242	0	0.29777	0.517193	-0.882764
00000004_2.tif	CX7389	Control	11.623	11.831	4.72931	2.05894	-2.67037	0	0.29777	0.613089	-0.78776
00000004_2.tif	CX7389	Control	10.043	12.029	4.72931	3.64954	-1.07977	0	0.29777	1.08672	-0.318531
00000004_2.tif	CX7389	Control	14.47	12.052	4.72931	1.02166	-3.70765	0	0.29777	0.30422	-1.09376
00000004_2.tif	CX7389	Control	11.086	12.073	4.72931	2.63519	-2.09412	0	0.29777	0.78468	-0.617765
00000004_2.tif	CX7389	Control	9.417	12.106	4.72931	4.27988	-0.449425	0	0.29777	1.27442	-0.13258
00000004_2.tif	CX7389	Control	9.512	12.187	4.72931	4.19953	-0.529776	0	0.29777	1.25049	-0.156284
00000004_2.tif	CX7389	Control	11.005	12.232	4.72931	2.75491	-1.9744	0	0.29777	0.82033	-0.582447
00000004_2.tif	CX7389	Control	14.552	12.236	4.72931	1.20074	-3.52857	0	0.29777	0.357545	-1.04093
00000004_2.tif	CX7389	Control	19.15	12.477	4.72931	5.59936	0.870053	1	0.29777	1.66732	0.256666
00000004_2.tif	CX7389	Control	12.404	12.466	4.72931	1.60589	-3.12342	0	0.29777	0.478186	-0.921408
00000004_2.tif	CX7389	Control	19.085	12.611	4.72931	5.56195	0.832641	1	0.29777	1.65618	0.245629
00000004_2.tif	CX7389	Control	17.109	12.613	4.72931	3.65371	-1.0756	0	0.29777	1.08797	-0.317302
00000004_2.tif	CX7389	Control	13.58	12.719	4.72931	1.27271	-3.4566	0	0.29777	0.378976	-1.0197
00000004_2.tif	CX7389	Control	17.028	12.859	4.72931	3.66454	-1.06477	0	0.29777	1.09119	-0.314107
00000004_2.tif	CX7389	Control	14.807	12.869	4.72931	1.83498	-2.89433	0	0.29777	0.546403	-0.853826
00000004_2.tif	CX7389	Control	10.713	13.023	4.72931	3.32913	-1.40018	0	0.29777	0.991315	-0.413052
00000004_2.tif	CX7389	Control	12.376	13.041	4.72931	2.03729	-2.69202	0	0.29777	0.606644	-0.794146
00000004_2.tif	CX7389	Control	12.724	13.099	4.72931	1.891	-2.83831	0	0.29777	0.563083	-0.837301
00000004_2.tif	CX7389	Control	8.099	13.251	4.72931	5.83267	1.10336	1	0.29777	1.73679	0.325491
00000004_2.tif	CX7389	Control	8.295	13.243	4.72931	5.64404	0.914735	1	0.29777	1.68063	0.269847
00000004_2.tif	CX7389	Control	13.421	13.248	4.72931	1.81401	-2.9153	0	0.29777	0.540157	-0.860014
00000004_2.tif	CX7389	Control	13.524	13.329	4.72931	1.88495	-2.84436	0	0.29777	0.561282	-0.839085
00000004_2.tif	CX7389	Control	17.302	13.363	4.72931	4.12717	-0.602135	0	0.29777	1.22895	-0.17763
00000004_2.tif	CX7389	Control	11.75	13.36	4.72931	2.69269	-2.03662	0	0.29777	0.801801	-0.600804
00000004_2.tif	CX7389	Control	14.946	13.394	4.72931	2.34028	-2.38903	0	0.29777	0.696866	-0.704763
00000004_2.tif	CX7389	Control	18.339	13.392	4.72931	5.0797	0.350394	1	0.29777	1.51258	0.103366
00000004_2.tif	CX7389	Control	13.055	13.514	4.72931	2.14887	-2.58044	0	0.29777	0.639869	-0.76123
00000004_2.tif	CX7389	Control	18.484	13.601	4.72931	5.29544	0.566128	1	0.29777	1.57682	0.167008
00000004_2.tif	CX7389	Control	15.226	13.587	4.72931	2.65927	-2.07004	0	0.29777	0.791851	-0.610661
00000004_2.tif	CX7389	Control	9.504	13.681	4.72931	4.70558	-0.0237321	0	0.29777	1.40118	-0.00700096
00000004_2.tif	CX7389	Control	16.849	13.776	4.72931	3.95965	-0.769663	0	0.29777	1.17906	-0.227051
00000004_2.tif	CX7389	Control	9.568	13.767	4.72931	4.69125	-0.0380569	0	0.29777	1.39691	-0.0112268
00000004_2.tif	CX7389	Control	11.18	13.886	4.72931	3.46771	-1.2616	0	0.29777	1.03258	-0.372172
00000004_2.tif	CX7389	Control	16.733	14.344	4.72931	4.23278	-0.496534	0	0.29777	1.26039	-0.146477
00000004_2.tif	CX7389	Control	10.988	14.431	4.72931	3.9954	-0.733905	0	0.29777	1.18971	-0.216502
00000004_2.tif	CX7389	Control	16.697	14.548	4.72931	4.34955	-0.379757	0	0.29777	1.29517	-0.112028
00000004_2.tif	CX7389	Control	17.044	14.589	4.72931	4.62734	-0.101968	0	0.29777	1.37788	-0.0300805
00000004_2.tif	CX7389	Control	9.686	14.772	4.72931	5.17016	0.440853	1	0.29777	1.53952	0.130052
00000004_2.tif	CX7389	Control	10.832	14.771	4.72931	4.35441	-0.374894	0	0.29777	1.29661	-0.110594
00000004_2.tif	CX7389	Control	10.811	14.873	4.72931	4.44611	-0.283204	0	0.29777	1.32392	-0.0835451
00000004_2.tif	CX7389	Control	9.7	14.945	4.72931	5.27256	0.543255	1	0.29777	1.57001	0.16026
00000004_2.tif	CX7389	Control	10.709	15.047	4.72931	4.6453	-0.0840134	0	0.29777	1.38323	-0.024784
00000004_2.tif	CX7389	Control	12.061	15.099	4.72931	3.9802	-0.749105	0	0.29777	1.18519	-0.220986
00000004_2.tif	CX7389	Control	11.969	15.143	4.72931	4.05775	-0.671557	0	0.29777	1.20828	-0.198109
00000004_2.tif	CX7389	Control	16.147	15.29	4.72931	4.58432	-0.144992	0	0.29777	1.36507	-0.0427725
00000004_2.tif	CX7389	Control	9.166	15.366	4.72931	5.95156	1.22226	1	0.29777	1.7722	0.360566
00000004_2.tif	CX7389	Control	9.318	15.392	4.72931	5.85549	1.12618	1	0.29777	1.74359	0.332222
00000004_2.tif	CX7389	Control	12.201	15.427	4.72931	4.23326	-0.496052	0	0.29777	1.26054	-0.146335
00000004_2.tif	CX7389	Control	12.108	15.509	4.72931	4.34248	-0.386825	0	0.29777	1.29306	-0.114113
00000004_2.tif	CX7389	Control	14.866	15.531	4.72931	4.26137	-0.467937	0	0.29777	1.26891	-0.138041
00000004_2.tif	CX7389	Control	11.99	15.522	4.72931	4.39771	-0.331604	0	0.29777	1.3095	-0.0978231
00000004_2.tif	CX7389	Control	9.118	15.738	4.72931	6.23754	1.50823	1	0.29777	1.85735	0.444928
00000004_2.tif	CX7389	Control	13.182	15.871	4.72931	4.44727	-0.282037	0	0.29777	1.32426	-0.083201
00000004_2.tif	CX7389	Control	9.218	15.895	4.72931	6.27559	1.54628	1	0.29777	1.86868	0.456152
00000004_2.tif	CX7389	Control	13.397	15.881	4.72931	4.43999	-0.289321	0	0.29777	1.3221	-0.0853498
00000004_2.tif	CX7389	Control	14.674	16.019	4.72931	4.68517	-0.0441381	0	0.29777	1.3951	-0.0130207
00000004_2.tif	CX7389	Control	12.57	16.083	4.72931	4.75826	0.0289472	1	0.29777	1.41687	0.00853943
00000004_2.tif	CX7389	Control	12.615	16.228	4.72931	4.88992	0.160616	1	0.29777	1.45607	0.0473816
00000004_2.tif	CX7389	Control	17.237	16.255	4.72931	6.00021	1.2709	1	0.29777	1.78668	0.374916
00000004_2.tif	CX7389	Control	11.168	16.289	4.72931	5.43836	0.709052	1	0.29777	1.61938	0.20917
00000004_2.tif	CX7389	Control	14.682	16.295	4.72931	4.95648	0.227172	1	0.29777	1.47589	0.0670158
00000004_2.tif	CX7389	Control	17.616	16.369	4.72931	6.32275	1.59344	1	0.29777	1.88272	0.470065
00000004_2.tif	CX7389	Control	10.975	16.383	4.72931	5.61146	0.88215	1	0.29777	1.67092	0.260234
00000004_2.tif	CX7389	Control	9.331	16.746	4.72931	6.83286	2.10356	1	0.29777	2.03462	0.620549
00000004_2.tif	CX7389	Control	10.453	16.774	4.72931	6.20979	1.48048	1	0.29777	1.84909	0.436743
00000004_2.tif	CX7389	Control	10.616	16.819	4.72931	6.16673	1.43742	1	0.29777	1.83627	0.424039
00000004_2.tif	CX7389	Control	12.822	16.84	4.72931	5.4546	0.725289	1	0.29777	1.62422	0.21396
00000004_2.tif	CX7389	Control	18.547	17.215	4.72931	7.56823	2.83892	1	0.29777	2.25359	0.837481
00000004_2.tif	CX7389	Control	18.756	17.376	4.72931	7.82645	3.09714	1	0.29777	2.33048	0.913656
00000004_2.tif	CX7389	Control	11.631	18.216	4.72931	7.06159	2.33228	1	0.29777	2.10273	0.688023
00000004_2.tif	CX7389	Control	11.547	18.353	4.72931	7.21698	2.48767	1	0.29777	2.149	0.733864
00000006_1.tif	CX7389	Control	7.752	4.014	5.06773	10.0771	5.00932	1	0.29777	3.00064	1.47775
00000006_1.tif	CX7389	Control	7.773	4.187	5.06773	9.94397	4.87624	1	0.29777	2.96101	1.43849
00000006_1.tif	CX7389	Control	7.972	5.394	5.06773	9.01285	3.94512	1	0.29777	2.68376	1.16381
00000006_1.tif	CX7389	Control	7.895	5.513	5.06773	9.002	3.93427	1	0.29777	2.68053	1.16061
00000006_1.tif	CX7389	Control	15.815	6.217	5.06773	4.74829	-0.319436	0	0.29777	1.4139	-0.0942335
00000006_1.tif	CX7389	Control	15.979	6.251	5.06773	4.74236	-0.325367	0	0.29777	1.41213	-0.0959832
00000006_1.tif	CX7389	Control	14.75	6.327	5.06773	4.59727	-0.470463	0	0.29777	1.36893	-0.138787
00000006_1.tif	CX7389	Control	16.512	6.409	5.06773	4.71854	-0.349194	0	0.29777	1.40504	-0.103012
00000006_1.tif	CX7389	Control	15.145	6.851	5.06773	4.06026	-1.00747	0	0.29777	1.20902	-0.297203
00000006_1.tif	CX7389	Control	11.715	6.895	5.06773	5.25164	0.18391	1	0.29777	1.56378	0.0542534
00000006_1.tif	CX7389	Control	11.558	6.954	5.06773	5.31004	0.242311	1	0.29777	1.58117	0.0714819
00000006_1.tif	CX7389	Control	17.603	7.039	5.06773	4.61112	-0.456612	0	0.29777	1.37305	-0.134701
00000006_1.tif	CX7389	Control	18.112	7.283	5.06773	4.71599	-0.35174	0	0.29777	1.40428	-0.103763
00000006_1.tif	CX7389	Control	18.817	7.895	5.06773	4.78746	-0.280268	0	0.29777	1.42556	-0.0826792
00000006_1.tif	CX7389	Control	17.96	8.284	5.06773	3.88413	-1.1836	0	0.29777	1.15658	-0.349162
00000006_1.tif	CX7389	Control	20.402	8.379	5.06773	5.87646	0.808735	1	0.29777	1.74983	0.238577
00000006_1.tif	CX7389	Control	18.09	8.397	5.06773	3.90721	-1.16052	0	0.29777	1.16345	-0.342354
00000006_1.tif	CX7389	Control	11.173	8.529	5.06773	4.5921	-0.475627	0	0.29777	1.36739	-0.14031
00000006_1.tif	CX7389	Control	20.32	8.559	5.06773	5.72632	0.658591	1	0.29777	1.70513	0.194284
00000006_1.tif	CX7389	Control	13.492	8.599	5.06773	2.81563	-2.2521	0	0.29777	0.838411	-0.664368
00000006_1.tif	CX7389	Control	16.131	8.86	5.06773	2.296	-2.77173	0	0.29777	0.683681	-0.81766
00000006_1.tif	CX7389	Control	12.005	9.013	5.06773	3.62977	-1.43796	0	0.29777	1.08084	-0.424198
00000006_1.tif	CX7389	Control	16.491	9.389	5.06773	2.06256	-3.00517	0	0.29777	0.614168	-0.886525
00000006_1.tif	CX7389	Control	19.486	9.415	5.06773	4.63506	-0.432669	0	0.29777	1.38018	-0.127637
00000006_1.tif	CX7389	Control	15.869	9.495	5.06773	1.61182	-3.45591	0	0.29777	0.479951	-1.01949
00000006_1.tif	CX7389	Control	15.146	9.504	5.06773	1.40778	-3.65994	0	0.29777	0.419196	-1.07968
00000006_1.tif	CX7389	Control	16.152	9.51	5.06773	1.7526	-3.31513	0	0.29777	0.521872	-0.977963
00000006_1.tif	CX7389	Control	7.17	9.915	5.06773	7.99131	2.92358	1	0.29777	2.37957	0.862457
00000006_1.tif	CX7389	Control	21.491	9.923	5.06773	6.46791	1.40018	1	0.29777	1.92595	0.413052
00000006_1.tif	CX7389	Control	11.933	9.929	5.06773	3.3148	-1.75293	0	0.29777	0.987047	-0.517115
00000006_1.tif	CX7389	Control	7.522	10.004	5.06773	7.63109	2.56336	1	0.29777	2.27231	0.756192
00000006_1.tif	CX7389	Control	5.861	10.141	5.06773	9.27003	4.20231	1	0.29777	2.76034	1.23968
00000006_1.tif	CX7389	Control	5.734	10.255	5.06773	9.38795	4.32022	1	0.29777	2.79545	1.27446
00000006_1.tif	CX7389	Control	5.159	10.61	5.06773	9.94456	4.87683	1	0.29777	2.96119	1.43866
00000006_1.tif	CX7389	Control	5.283	10.636	5.06773	9.81985	4.75212	1	0.29777	2.92406	1.40188
00000006_1.tif	CX7389	Control	23.696	11.367	5.06773	8.60909	3.54136	1	0.29777	2.56353	1.0447
00000006_1.tif	CX7389	Control	15.483	11.347	5.06773	0.580992	-4.48674	0	0.29777	0.173002	-1.32359
00000006_1.tif	CX7389	Control	15.271	11.36	5.06773	0.480817	-4.58691	0	0.29777	0.143173	-1.35314
00000006_1.tif	CX7389	Control	18.842	11.527	5.06773	3.79335	-1.27438	0	0.29777	1.12955	-0.375942
00000006_1.tif	CX7389	Control	18.817	11.637	5.06773	3.78822	-1.27951	0	0.29777	1.12802	-0.377456
00000006_1.tif	CX7389	Control	18.962	11.788	5.06773	3.9613	-1.10643	0	0.29777	1.17956	-0.326397
00000006_1.tif	CX7389	Control	14.829	11.87	5.06773	0.996284	-4.07145	0	0.29777	0.296663	-1.20108
00000006_1.tif	CX7389	Control	16.323	12.024	5.06773	1.65437	-3.41336	0	0.29777	0.492622	-1.00694
00000006_1.tif	CX7389	Control	13.735	12.124	5.06773	1.82534	-3.24239	0	0.29777	0.543531	-0.956505
00000006_1.tif	CX7389	Control	16.405	12.171	5.06773	1.81473	-3.253	0	0.29777	0.540371	-0.959635
00000006_1.tif	CX7389	Control	13.567	12.266	5.06773	2.04525	-3.02248	0	0.29777	0.609014	-0.891631
00000006_1.tif	CX7389	Control	19.168	13.117	5.06773	4.62852	-0.439209	0	0.29777	1.37823	-0.129567
00000006_1.tif	CX7389	Control	12.143	13.129	5.06773	3.6956	-1.37213	0	0.29777	1.10044	-0.404778
00000006_1.tif	CX7389	Control	14.499	13.138	5.06773	2.30641	-2.76132	0	0.29777	0.68678	-0.814589
00000006_1.tif	CX7389	Control	17.258	13.198	5.06773	3.1451	-1.92263	0	0.29777	0.936516	-0.567176
00000006_1.tif	CX7389	Control	14.595	13.221	5.06773	2.36434	-2.70339	0	0.29777	0.70403	-0.797499
00000006_1.tif	CX7389	Control	19.814	13.233	5.06773	5.25575	0.188021	1	0.29777	1.565	0.0554662
00000006_1.tif	CX7389	Control	9.997	13.29	5.06773	5.62939	0.561662	1	0.29777	1.67626	0.16569
00000006_1.tif	CX7389	Control	10.454	13.316	5.06773	5.23068	0.162954	1	0.29777	1.55754	0.0480716
00000006_1.tif	CX7389	Control	12.035	13.325	5.06773	3.9007	-1.16703	0	0.29777	1.16151	-0.344272
00000006_1.tif	CX7389	Control	10.384	13.397	5.06773	5.33024	0.262507	1	0.29777	1.58718	0.0774397
00000006_1.tif	CX7389	Control	20.291	13.407	5.06773	5.76081	0.693076	1	0.29777	1.7154	0.204458
00000006_1.tif	CX7389	Control	17.278	13.421	5.06773	3.32387	-1.74385	0	0.29777	0.98975	-0.514437
00000006_1.tif	CX7389	Control	22.085	13.416	5.06773	7.42154	2.35381	1	0.29777	2.20991	0.694374
00000006_1.tif	CX7389	Control	13.206	13.486	5.06773	3.19595	-1.87178	0	0.29777	0.951657	-0.552176
00000006_1.tif	CX7389	Control	21.454	13.53	5.06773	6.87351	1.80578	1	0.29777	2.04673	0.532706
00000006_1.tif	CX7389	Control	20.608	13.645	5.06773	6.15011	1.08238	1	0.29777	1.83132	0.319302
00000006_1.tif	CX7389	Control	13.121	13.67	5.06773	3.39478	-1.67294	0	0.29777	1.01087	-0.493519
00000006_1.tif	CX7389	Control	13.027	13.73	5.06773	3.49856	-1.56917	0	0.29777	1.04177	-0.462904
00000006_1.tif	CX7389	Control	22.153	13.81	5.06773	7.62647	2.55875	1	0.29777	2.27094	0.75483
00000006_1.tif	CX7389	Control	12.721	13.857	5.06773	3.786	-1.28173	0	0.29777	1.12736	-0.37811
00000006_1.tif	CX7389	Control	12.461	13.965	5.06773	4.03559	-1.03214	0	0.29777	1.20168	-0.304482
00000006_1.tif	CX7389	Control	12.908	13.995	5.06773	3.78306	-1.28467	0	0.29777	1.12648	-0.378978
00000006_1.tif	CX7389	Control	12.152	14.039	5.06773	4.29758	-0.770149	0	0.29777	1.27969	-0.227194
00000006_1.tif	CX7389	Control	20.281	14.27	5.06773	6.17544	1.10771	1	0.29777	1.83886	0.326773
00000006_1.tif	CX7389	Control	10.836	14.301	5.06773	5.44658	0.378854	1	0.29777	1.62183	0.111762
00000006_1.tif	CX7389	Control	20.381	14.4	5.06773	6.3303	1.26257	1	0.29777	1.88497	0.372457
00000006_1.tif	CX7389	Control	18	14.413	5.06773	4.54751	-0.520224	0	0.29777	1.35411	-0.153466
00000006_1.tif	CX7389	Control	18.1	14.402	5.06773	4.60359	-0.464135	0	0.29777	1.37081	-0.13692
00000006_1.tif	CX7389	Control	17.722	14.47	5.06773	4.42115	-0.646574	0	0.29777	1.31649	-0.190739
00000006_1.tif	CX7389	Control	17.914	14.556	5.06773	4.60546	-0.46227	0	0.29777	1.37137	-0.13637
00000006_1.tif	CX7389	Control	23.378	14.874	5.06773	9.17863	4.1109	1	0.29777	2.73312	1.21272
00000006_1.tif	CX7389	Control	10.9	14.999	5.06773	5.86032	0.79259	1	0.29777	1.74503	0.233814
00000006_1.tif	CX7389	Control	12.385	15.205	5.06773	5.07979	0.0120575	1	0.29777	1.51261	0.00355697
00000006_1.tif	CX7389	Control	12.429	15.289	5.06773	5.12794	0.0602124	1	0.29777	1.52695	0.0177627
00000006_1.tif	CX7389	Control	12.336	15.345	5.06773	5.22442	0.156687	1	0.29777	1.55567	0.0462227
00000006_1.tif	CX7389	Control	22.819	15.575	5.06773	9.0195	3.95177	1	0.29777	2.68574	1.16577
00000006_1.tif	CX7389	Control	22.695	15.784	5.06773	9.02471	3.95698	1	0.29777	2.68729	1.16731
00000006_1.tif	CX7389	Control	10.76	16.667	5.06773	7.20822	2.14049	1	0.29777	2.14639	0.631445
00000006_1.tif	CX7389	Control	10.97	16.742	5.06773	7.14487	2.07714	1	0.29777	2.12753	0.612757
00000006_1.tif	CX7389	Control	21.003	16.836	5.06773	8.36438	3.29665	1	0.29777	2.49066	0.972512
00000006_1.tif	CX7389	Control	11.393	16.871	5.06773	7.01826	1.95054	1	0.29777	2.08983	0.575408
00000006_1.tif	CX7389	Control	11.537	16.875	5.06773	6.94674	1.87901	1	0.29777	2.06853	0.554307
00000006_1.tif	CX7389	Control	10.918	17.064	5.06773	7.4391	2.37137	1	0.29777	2.21514	0.699554
00000006_1.tif	CX7389	Control	22.01	17.161	5.06773	9.31796	4.25023	1	0.29777	2.77461	1.25382
00000006_1.tif	CX7389	Control	10.804	17.2	5.06773	7.61568	2.54795	1	0.29777	2.26772	0.751645
00000006_1.tif	CX7389	Control	22.002	17.406	5.06773	9.47821	4.41048	1	0.29777	2.82233	1.30109
00000006_1.tif	CX7389	Control	9.444	18.185	5.06773	9.21358	4.14585	1	0.29777	2.74353	1.22303
00000006_1.tif	CX7389	Control	21.091	19.27	5.06773	10.2848	5.21706	1	0.29777	3.0625	1.53903
00000006_1.tif	CX7389	Control	21.08	19.444	5.06773	10.4204	5.35266	1	0.29777	3.10288	1.57903
00000005_4.tif	CX7389	Control	13.123	3.391	5.07303	7.37781	2.30478	1	0.29777	2.19689	0.651589
00000005_4.tif	CX7389	Control	14.102	3.469	5.07303	7.0381	1.96506	1	0.29777	2.09573	0.555548
00000005_4.tif	CX7389	Control	13.347	3.478	5.07303	7.22396	2.15093	1	0.29777	2.15108	0.608093
00000005_4.tif	CX7389	Control	14.049	3.48	5.07303	7.03854	1.96551	1	0.29777	2.09587	0.555673
00000005_4.tif	CX7389	Control	13.452	3.514	5.07303	7.15805	2.08502	1	0.29777	2.13145	0.58946
00000005_4.tif	CX7389	Control	13.361	3.564	5.07303	7.13782	2.06479	1	0.29777	2.12543	0.583741
00000005_4.tif	CX7389	Control	13.287	3.603	5.07303	7.12402	2.05098	1	0.29777	2.12132	0.579838
00000005_4.tif	CX7389	Control	7.511	3.858	5.07303	10.3449	5.27185	1	0.29777	3.0804	1.49042
00000005_4.tif	CX7389	Control	18.655	4.227	5.07303	6.86344	1.7904	1	0.29777	2.04373	0.506169
00000005_4.tif	CX7389	Control	18.535	4.218	5.07303	6.8183	1.74527	1	0.29777	2.03029	0.493408
00000005_4.tif	CX7389	Control	18.513	4.26	5.07303	6.77091	1.69788	1	0.29777	2.01617	0.480011
00000005_4.tif	CX7389	Control	12.152	4.346	5.07303	6.90827	1.83523	1	0.29777	2.05707	0.518843
00000005_4.tif	CX7389	Control	19.755	4.387	5.07303	7.2929	2.21986	1	0.29777	2.17161	0.627582
00000005_4.tif	CX7389	Control	17.576	4.41	5.07303	6.27593	1.2029	1	0.29777	1.86878	0.340074
00000005_4.tif	CX7389	Control	12.018	4.485	5.07303	6.85603	1.78299	1	0.29777	2.04152	0.504074
00000005_4.tif	CX7389	Control	13.534	4.537	5.07303	6.16038	1.08735	1	0.29777	1.83438	0.307406
00000005_4.tif	CX7389	Control	18.458	4.665	5.07303	6.38369	1.31066	1	0.29777	1.90087	0.370539
00000005_4.tif	CX7389	Control	13.232	5.321	5.07303	5.54617	0.473135	1	0.29777	1.65148	0.133761
00000005_4.tif	CX7389	Control	19.219	5.359	5.07303	6.19061	1.11758	1	0.29777	1.84338	0.315953
00000005_4.tif	CX7389	Control	14.914	5.469	5.07303	4.92779	-0.145242	0	0.29777	1.46735	-0.0410618
00000005_4.tif	CX7389	Control	18.836	5.656	5.07303	5.72628	0.653246	1	0.29777	1.70511	0.184681
00000005_4.tif	CX7389	Control	18.892	5.831	5.07303	5.61662	0.543587	1	0.29777	1.67246	0.153679
00000005_4.tif	CX7389	Control	17.793	5.979	5.07303	4.91101	-0.162027	0	0.29777	1.46235	-0.0458071
00000005_4.tif	CX7389	Control	22.151	6.061	5.07303	7.86414	2.79111	1	0.29777	2.34171	0.789081
00000005_4.tif	CX7389	Control	14.464	6.121	5.07303	4.37309	-0.699947	0	0.29777	1.30217	-0.197883
00000005_4.tif	CX7389	Control	17.947	6.143	5.07303	4.8395	-0.233535	0	0.29777	1.44106	-0.0660233
00000005_4.tif	CX7389	Control	22.148	6.235	5.07303	7.76798	2.69495	1	0.29777	2.31307	0.761895
00000005_4.tif	CX7389	Control	21.124	6.267	5.07303	6.90213	1.8291	1	0.29777	2.05525	0.517108
00000005_4.tif	CX7389	Control	14.557	6.946	5.07303	3.5531	-1.51994	0	0.29777	1.05801	-0.429705
00000005_4.tif	CX7389	Control	21.178	7.089	5.07303	6.49613	1.42309	1	0.29777	1.93435	0.402326
00000005_4.tif	CX7389	Control	11.436	7.436	5.07303	5.05357	-0.0194609	0	0.29777	1.5048	-0.00550183
00000005_4.tif	CX7389	Control	22.639	7.423	5.07303	7.65994	2.58691	1	0.29777	2.2809	0.73135
00000005_4.tif	CX7389	Control	19.315	7.492	5.07303	4.71975	-0.353282	0	0.29777	1.4054	-0.0998773
00000005_4.tif	CX7389	Control	15.054	7.491	5.07303	2.90772	-2.16531	0	0.29777	0.865832	-0.612161
00000005_4.tif	CX7389	Control	11.365	7.547	5.07303	5.04916	-0.0238698	0	0.29777	1.50349	-0.00674828
00000005_4.tif	CX7389	Control	22.331	7.585	5.07303	7.31346	2.24043	1	0.29777	2.17773	0.633396
00000005_4.tif	CX7389	Control	19.242	7.668	5.07303	4.55598	-0.517049	0	0.29777	1.35664	-0.146176
00000005_4.tif	CX7389	Control	14.454	7.798	5.07303	2.78582	-2.28721	0	0.29777	0.829534	-0.646623
00000005_4.tif	CX7389	Control	12.88	7.849	5.07303	3.6699	-1.40314	0	0.29777	1.09279	-0.396684
00000005_4.tif	CX7389	Control	13.426	8.024	5.07303	3.16092	-1.91212	0	0.29777	0.941226	-0.540579
00000005_4.tif	CX7389	Control	9.879	8.347	5.07303	6.02698	0.95395	1	0.29777	1.79466	0.269693
00000005_4.tif	CX7389	Control	10.039	8.399	5.07303	5.8588	0.785768	1	0.29777	1.74458	0.222146
00000005_4.tif	CX7389	Control	11.198	8.546	5.07303	4.7237	-0.349332	0	0.29777	1.40658	-0.0987604
00000005_4.tif	CX7389	Control	11.179	8.585	5.07303	4.72653	-0.346508	0	0.29777	1.40742	-0.097962
00000005_4.tif	CX7389	Control	11.351	8.647	5.07303	4.54383	-0.529206	0	0.29777	1.35302	-0.149613
00000005_4.tif	CX7389	Control	21.918	8.614	5.07303	6.58987	1.51683	1	0.29777	1.96226	0.428827
00000005_4.tif	CX7389	Control	15.133	8.634	5.07303	1.77269	-3.30034	0	0.29777	0.527855	-0.933047
00000005_4.tif	CX7389	Control	19.309	8.667	5.07303	4.10926	-0.963779	0	0.29777	1.22361	-0.272472
00000005_4.tif	CX7389	Control	19.73	8.682	5.07303	4.49086	-0.582176	0	0.29777	1.33724	-0.164588
00000005_4.tif	CX7389	Control	22.109	8.655	5.07303	6.76386	1.69083	1	0.29777	2.01407	0.478017
00000005_4.tif	CX7389	Control	19.612	8.707	5.07303	4.37208	-0.700951	0	0.29777	1.30188	-0.198167
00000005_4.tif	CX7389	Control	22.869	8.893	5.07303	7.45163	2.37859	1	0.29777	2.21887	0.672458
00000005_4.tif	CX7389	Control	12.156	8.952	5.07303	3.68326	-1.38977	0	0.29777	1.09677	-0.392905
00000005_4.tif	CX7389	Control	22.917	8.966	5.07303	7.48482	2.41179	1	0.29777	2.22876	0.681842
00000005_4.tif	CX7389	Control	11.55	9.036	5.07303	4.22295	-0.850088	0	0.29777	1.25747	-0.24033
00000005_4.tif	CX7389	Control	22.859	9.094	5.07303	7.40499	2.33195	1	0.29777	2.20498	0.659271
00000005_4.tif	CX7389	Control	13.711	9.144	5.07303	2.2114	-2.86163	0	0.29777	0.658489	-0.809018
00000005_4.tif	CX7389	Control	22.803	9.164	5.07303	7.33813	2.2651	1	0.29777	2.18508	0.640371
00000005_4.tif	CX7389	Control	11.944	9.176	5.07303	3.80495	-1.26809	0	0.29777	1.133	-0.358504
00000005_4.tif	CX7389	Control	18.94	9.203	5.07303	3.56871	-1.50432	0	0.29777	1.06265	-0.425291
00000005_4.tif	CX7389	Control	12.05	9.265	5.07303	3.67696	-1.39607	0	0.29777	1.09489	-0.394686
00000005_4.tif	CX7389	Control	12.722	9.319	5.07303	3.02272	-2.05032	0	0.29777	0.900075	-0.579649
00000005_4.tif	CX7389	Control	15.925	9.328	5.07303	1.08832	-3.98471	0	0.29777	0.32407	-1.12653
00000005_4.tif	CX7389	Control	23.972	9.314	5.07303	8.47406	3.40103	1	0.29777	2.52332	0.961512
00000005_4.tif	CX7389	Control	18.83	9.378	5.07303	3.41063	-1.6624	0	0.29777	1.01558	-0.469982
00000005_4.tif	CX7389	Control	12.633	9.333	5.07303	3.10185	-1.97118	0	0.29777	0.923638	-0.557277
00000005_4.tif	CX7389	Control	21.071	9.405	5.07303	5.59014	0.517108	1	0.29777	1.66458	0.146193
00000005_4.tif	CX7389	Control	12.756	9.443	5.07303	2.95018	-2.12285	0	0.29777	0.878475	-0.600157
00000005_4.tif	CX7389	Control	12.952	9.475	5.07303	2.75404	-2.31899	0	0.29777	0.820071	-0.655608
00000005_4.tif	CX7389	Control	20.97	9.517	5.07303	5.47239	0.399354	1	0.29777	1.62951	0.112902
00000005_4.tif	CX7389	Control	21.081	9.513	5.07303	5.58271	0.509675	1	0.29777	1.66236	0.144091
00000005_4.tif	CX7389	Control	21.083	9.565	5.07303	5.57709	0.504059	1	0.29777	1.66069	0.142504
00000005_4.tif	CX7389	Control	12.331	9.628	5.07303	3.31156	-1.76147	0	0.29777	0.986084	-0.49799
00000005_4.tif	CX7389	Control	21.897	9.61	5.07303	6.37854	1.30551	1	0.29777	1.89934	0.369082
00000005_4.tif	CX7389	Control	9.128	9.677	5.07303	6.46952	1.39649	1	0.29777	1.92643	0.394804
00000005_4.tif	CX7389	Control	8.992	9.743	5.07303	6.59835	1.52532	1	0.29777	1.96479	0.431225
00000005_4.tif	CX7389	Control	9.716	9.758	5.07303	5.8763	0.803269	1	0.29777	1.74979	0.227094
00000005_4.tif	CX7389	Control	12.275	9.827	5.07303	3.32898	-1.74406	0	0.29777	0.99127	-0.493066
00000005_4.tif	CX7389	Control	18.273	9.897	5.07303	2.74925	-2.32378	0	0.29777	0.818644	-0.656962
00000005_4.tif	CX7389	Control	9.584	9.88	5.07303	5.99676	0.923729	1	0.29777	1.78566	0.261149
00000005_4.tif	CX7389	Control	19.14	9.862	5.07303	3.61167	-1.46137	0	0.29777	1.07545	-0.413146
00000005_4.tif	CX7389	Control	9.762	9.881	5.07303	5.81926	0.746221	1	0.29777	1.7328	0.210966
00000005_4.tif	CX7389	Control	19.157	9.923	5.07303	3.62074	-1.45229	0	0.29777	1.07815	-0.41058
00000005_4.tif	CX7389	Control	15.63	10.094	5.07303	0.268745	-4.80429	0	0.29777	0.0800243	-1.35823
00000005_4.tif	CX7389	Control	9.899	10.112	5.07303	5.66817	0.595135	1	0.29777	1.68781	0.168252
00000005_4.tif	CX7389	Control	15.731	10.152	5.07303	0.263372	-4.80966	0	0.29777	0.0784244	-1.35975
00000005_4.tif	CX7389	Control	15.108	10.276	5.07303	0.460652	-4.61238	0	0.29777	0.137168	-1.30398
00000005_4.tif	CX7389	Control	8.311	10.318	5.07303	7.25109	2.17806	1	0.29777	2.15916	0.615763
00000005_4.tif	CX7389	Control	20.444	10.34	5.07303	4.88202	-0.191014	0	0.29777	1.45372	-0.0540019
00000005_4.tif	CX7389	Control	12.805	10.395	5.07303	2.7573	-2.31573	0	0.29777	0.821043	-0.654685
00000005_4.tif	CX7389	Control	20.648	10.397	5.07303	5.08618	0.0131479	1	0.29777	1.51451	0.00371707
00000005_4.tif	CX7389	Control	15.219	10.488	5.07303	0.368246	-4.70479	0	0.29777	0.109653	-1.3301
00000005_4.tif	CX7389	Control	7.892	10.538	5.07303	7.67221	2.59917	1	0.29777	2.28455	0.734818
00000005_4.tif	CX7389	Control	9.694	10.586	5.07303	5.87258	0.799551	1	0.29777	1.74868	0.226043
00000005_4.tif	CX7389	Control	12.805	10.586	5.07303	2.76674	-2.30629	0	0.29777	0.823853	-0.652016
00000005_4.tif	CX7389	Control	10.614	10.58	5.07303	4.95316	-0.119875	0	0.29777	1.4749	-0.0338902
00000005_4.tif	CX7389	Control	13.667	10.651	5.07303	1.91813	-3.1549	0	0.29777	0.571162	-0.891929
00000005_4.tif	CX7389	Control	10.699	10.688	5.07303	4.87446	-0.198577	0	0.29777	1.45147	-0.0561403
00000005_4.tif	CX7389	Control	11.438	10.721	5.07303	4.1403	-0.932736	0	0.29777	1.23286	-0.263696
00000005_4.tif	CX7389	Control	11.53	10.731	5.07303	4.04959	-1.02345	0	0.29777	1.20585	-0.289341
00000005_4.tif	CX7389	Control	10.411	10.769	5.07303	5.16769	0.0946567	1	0.29777	1.53878	0.0267606
00000005_4.tif	CX7389	Control	10.498	10.765	5.07303	5.08065	0.00761737	1	0.29777	1.51287	0.00215352
00000005_4.tif	CX7389	Control	23.896	10.853	5.07303	8.34893	3.27589	1	0.29777	2.48606	0.926135
00000005_4.tif	CX7389	Control	11.345	10.854	5.07303	4.24654	-0.826495	0	0.29777	1.26449	-0.23366
00000005_4.tif	CX7389	Control	11.268	10.873	5.07303	4.32525	-0.747783	0	0.29777	1.28793	-0.211407
00000005_4.tif	CX7389	Control	23.728	10.873	5.07303	8.18248	3.10944	1	0.29777	2.4365	0.879077
00000005_4.tif	CX7389	Control	14.559	10.951	5.07303	1.16723	-3.90581	0	0.29777	0.347565	-1.10422
00000005_4.tif	CX7389	Control	20.521	10.989	5.07303	4.99949	-0.0735433	0	0.29777	1.4887	-0.0207916
00000005_4.tif	CX7389	Control	15.265	11.019	5.07303	0.728309	-4.34472	0	0.29777	0.216869	-1.22831
00000005_4.tif	CX7389	Control	7.788	11.075	5.07303	7.80736	2.73433	1	0.29777	2.3248	0.773028
00000005_4.tif	CX7389	Control	21.061	11.096	5.07303	5.54883	0.475801	1	0.29777	1.65228	0.134515
00000005_4.tif	CX7389	Control	5.069	11.641	5.07303	10.5716	5.4986	1	0.29777	3.14792	1.55452
00000005_4.tif	CX7389	Control	12.836	11.843	5.07303	3.10615	-1.96688	0	0.29777	0.92492	-0.556061
00000005_4.tif	CX7389	Control	8.156	12.575	5.07303	7.73186	2.65883	1	0.29777	2.30232	0.751683
00000005_4.tif	CX7389	Control	14.528	12.619	5.07303	2.48986	-2.58318	0	0.29777	0.741404	-0.730296
00000005_4.tif	CX7389	Control	23.366	12.695	5.07303	8.14756	3.07452	1	0.29777	2.4261	0.869206
00000005_4.tif	CX7389	Control	10.055	12.749	5.07303	6.00525	0.93222	1	0.29777	1.78818	0.26355
00000005_4.tif	CX7389	Control	23.384	12.743	5.07303	8.17869	3.10566	1	0.29777	2.43537	0.878008
00000005_4.tif	CX7389	Control	8.101	12.807	5.07303	7.8539	2.78087	1	0.29777	2.33866	0.786185
00000005_4.tif	CX7389	Control	6.744	12.864	5.07303	9.16827	4.09524	1	0.29777	2.73004	1.15777
00000005_4.tif	CX7389	Control	13.985	12.882	5.07303	2.97955	-2.09348	0	0.29777	0.88722	-0.591854
00000005_4.tif	CX7389	Control	12.757	12.97	5.07303	3.83555	-1.23748	0	0.29777	1.14211	-0.34985
00000005_4.tif	CX7389	Control	17.972	13.133	5.07303	3.67844	-1.39459	0	0.29777	1.09533	-0.394268
00000005_4.tif	CX7389	Control	18.156	13.172	5.07303	3.83014	-1.2429	0	0.29777	1.1405	-0.351382
00000005_4.tif	CX7389	Control	18.095	13.203	5.07303	3.8122	-1.26083	0	0.29777	1.13516	-0.356452
00000005_4.tif	CX7389	Control	15.869	13.23	5.07303	2.89234	-2.18069	0	0.29777	0.861252	-0.616509
00000005_4.tif	CX7389	Control	14.177	13.333	5.07303	3.28522	-1.78781	0	0.29777	0.97824	-0.505437
00000005_4.tif	CX7389	Control	14.316	13.391	5.07303	3.28266	-1.79037	0	0.29777	0.977479	-0.506159
00000005_4.tif	CX7389	Control	23.876	13.562	5.07303	8.91145	3.83841	1	0.29777	2.65356	1.08517
00000005_4.tif	CX7389	Control	23.823	13.689	5.07303	8.90878	3.83575	1	0.29777	2.65277	1.08441
00000005_4.tif	CX7389	Control	20.861	14.048	5.07303	6.45949	1.38646	1	0.29777	1.92344	0.391969
00000005_4.tif	CX7389	Control	11.608	14.095	5.07303	5.44327	0.370237	1	0.29777	1.62084	0.104671
00000005_4.tif	CX7389	Control	23.017	14.77	5.07303	8.66476	3.59173	1	0.29777	2.58011	1.01543
00000005_4.tif	CX7389	Control	14.043	14.926	5.07303	4.81773	-0.255302	0	0.29777	1.43458	-0.0721769
00000005_4.tif	CX7389	Control	15.046	14.945	5.07303	4.61991	-0.453127	0	0.29777	1.37567	-0.128105
00000005_4.tif	CX7389	Control	17.271	15.012	5.07303	4.96162	-0.111417	0	0.29777	1.47742	-0.0314989
00000005_4.tif	CX7389	Control	22.03	15.054	5.07303	7.99531	2.92228	1	0.29777	2.38076	0.826164
00000005_4.tif	CX7389	Control	17.214	15.032	5.07303	4.96113	-0.111906	0	0.29777	1.47727	-0.0316372
00000005_4.tif	CX7389	Control	16.763	15.22	5.07303	5.01202	-0.0610126	0	0.29777	1.49243	-0.017249
00000005_4.tif	CX7389	Control	21.246	15.207	5.07303	7.47392	2.40089	1	0.29777	2.22551	0.67876
00000005_4.tif	CX7389	Control	16.931	15.256	5.07303	5.08957	0.0165403	1	0.29777	1.51552	0.00467614
00000005_4.tif	CX7389	Control	22.008	15.349	5.07303	8.15481	3.08178	1	0.29777	2.42826	0.871256
00000005_4.tif	CX7389	Control	20.261	15.509	5.07303	6.97529	1.90225	1	0.29777	2.07703	0.53779
00000005_4.tif	CX7389	Control	20.366	15.655	5.07303	7.15395	2.08092	1	0.29777	2.13023	0.588301
00000005_4.tif	CX7389	Control	10.184	15.749	5.07303	7.61767	2.54464	1	0.29777	2.26831	0.7194
00000005_4.tif	CX7389	Control	20.383	15.754	5.07303	7.23893	2.16589	1	0.29777	2.15553	0.612324
00000005_4.tif	CX7389	Control	20.424	15.83	5.07303	7.32295	2.24992	1	0.29777	2.18056	0.636079
00000005_4.tif	CX7389	Control	20.856	15.956	5.07303	7.70771	2.63468	1	0.29777	2.29513	0.744856
00000005_4.tif	CX7389	Control	11.861	15.965	5.07303	6.72166	1.64863	1	0.29777	2.00151	0.466087
00000005_4.tif	CX7389	Control	14.513	15.989	5.07303	5.73181	0.658774	1	0.29777	1.70676	0.186244
00000005_4.tif	CX7389	Control	14.56	16.012	5.07303	5.74604	0.673005	1	0.29777	1.711	0.190267
00000005_4.tif	CX7389	Control	11.507	16.055	5.07303	6.99603	1.923	1	0.29777	2.08321	0.543654
00000005_4.tif	CX7389	Control	17.405	16.14	5.07303	6.07243	0.999399	1	0.29777	1.80819	0.282542
00000005_4.tif	CX7389	Control	17.484	16.123	5.07303	6.08074	1.00771	1	0.29777	1.81066	0.284892
00000005_4.tif	CX7389	Control	11.709	16.17	5.07303	6.97649	1.90346	1	0.29777	2.07739	0.538131
00000005_4.tif	CX7389	Control	13.679	16.232	5.07303	6.17224	1.09921	1	0.29777	1.83791	0.31076
00000005_4.tif	CX7389	Control	16.142	16.328	5.07303	6.00209	0.929055	1	0.29777	1.78724	0.262655
00000005_4.tif	CX7389	Control	15.999	16.415	5.07303	6.07673	1.0037	1	0.29777	1.80947	0.283758
00000005_4.tif	CX7389	Control	21.832	16.434	5.07303	8.7338	3.66077	1	0.29777	2.60066	1.03494
00000005_4.tif	CX7389	Control	16.001	16.475	5.07303	6.13672	1.06369	1	0.29777	1.82733	0.300718
00000005_4.tif	CX7389	Control	14.922	16.649	5.07303	6.32745	1.25442	1	0.29777	1.88412	0.354639
00000005_4.tif	CX7389	Control	10.561	16.635	5.07303	8.02876	2.95572	1	0.29777	2.39072	0.835619
00000005_4.tif	CX7389	Control	13.727	16.659	5.07303	6.5666	1.49357	1	0.29777	1.95534	0.42225
00000005_4.tif	CX7389	Control	14.82	16.685	5.07303	6.37433	1.3013	1	0.29777	1.89809	0.367893
00000005_4.tif	CX7389	Control	13.128	16.694	5.07303	6.79117	1.71813	1	0.29777	2.02221	0.485737
00000005_4.tif	CX7389	Control	17.925	16.756	5.07303	6.82418	1.75114	1	0.29777	2.03203	0.495069
00000005_4.tif	CX7389	Control	14.737	16.762	5.07303	6.46089	1.38786	1	0.29777	1.92386	0.392364
00000005_4.tif	CX7389	Control	17.139	17.098	5.07303	6.92593	1.85289	1	0.29777	2.06233	0.523836
00000005_4.tif	CX7389	Control	16.835	17.258	5.07303	7.02038	1.94735	1	0.29777	2.09046	0.550539
00000005_4.tif	CX7389	Control	16.936	17.342	5.07303	7.1218	2.04877	1	0.29777	2.12066	0.579211
00000005_4.tif	CX7389	Control	15.963	17.387	5.07303	7.04442	1.97139	1	0.29777	2.09762	0.557336
00000005_4.tif	CX7389	Control	13.167	17.8	5.07303	7.8217	2.74866	1	0.29777	2.32907	0.777081
00000005_4.tif	CX7389	Control	20.708	17.953	5.07303	9.17748	4.10444	1	0.29777	2.73278	1.16038
00000005_4.tif	CX7389	Control	13.46	18.033	5.07303	7.9615	2.88846	1	0.29777	2.3707	0.816604
00000005_4.tif	CX7389	Control	20.132	18.121	5.07303	9.01173	3.93869	1	0.29777	2.68342	1.11352
00000005_4.tif	CX7389	Control	19.955	18.18	5.07303	8.97467	3.90164	1	0.29777	2.67239	1.10304
00000005_4.tif	CX7389	Control	20.24	18.191	5.07303	9.12701	4.05397	1	0.29777	2.71775	1.14611
00000005_4.tif	CX7389	Control	20.009	18.204	5.07303	9.0221	3.94907	1	0.29777	2.68651	1.11645
00000005_4.tif	CX7389	Control	20.057	18.276	5.07303	9.10841	4.03537	1	0.29777	2.71221	1.14085
00000005_4.tif	CX7389	Control	14.068	18.326	5.07303	8.11078	3.03775	1	0.29777	2.41515	0.858809
00000005_4.tif	CX7389	Control	21.187	18.57	5.07303	9.95707	4.88404	1	0.29777	2.96492	1.38078
00000005_4.tif	CX7389	Control	21.058	18.648	5.07303	9.9497	4.87666	1	0.29777	2.96272	1.37869
00000005_4.tif	CX7389	Control	14.963	18.795	5.07303	8.46223	3.38919	1	0.29777	2.5198	0.958166
00000007_1.tif	CX7389	Control	14.265	2.257	5.81759	9.68601	3.86842	1	0.29777	2.8842	1.09365
00000007_1.tif	CX7389	Control	20.31	2.932	5.81759	10.8564	5.0388	1	0.29777	3.23271	1.42453
00000007_1.tif	CX7389	Control	11.201	2.952	5.81759	9.49553	3.67794	1	0.29777	2.82748	1.0398
00000007_1.tif	CX7389	Control	11.039	3.594	5.81759	8.94698	3.1294	1	0.29777	2.66414	0.884718
00000007_1.tif	CX7389	Control	11.533	3.957	5.81759	8.43715	2.61956	1	0.29777	2.51233	0.740583
00000007_1.tif	CX7389	Control	10.091	4.394	5.81759	8.62127	2.80368	1	0.29777	2.56716	0.792636
00000007_1.tif	CX7389	Control	10.076	4.456	5.81759	8.57433	2.75675	1	0.29777	2.55318	0.779367
00000007_1.tif	CX7389	Control	9.85	4.553	5.81759	8.60326	2.78568	1	0.29777	2.56179	0.787545
00000007_1.tif	CX7389	Control	15.563	4.699	5.81759	7.36114	1.54356	1	0.29777	2.19193	0.436382
00000007_1.tif	CX7389	Control	15.54	4.749	5.81759	7.30786	1.49028	1	0.29777	2.17606	0.42132
00000007_1.tif	CX7389	Control	15.669	4.882	5.81759	7.20119	1.3836	1	0.29777	2.1443	0.391162
00000007_1.tif	CX7389	Control	15.622	4.912	5.81759	7.16266	1.34507	1	0.29777	2.13282	0.380268
00000007_1.tif	CX7389	Control	14.766	5.188	5.81759	6.7743	0.956715	1	0.29777	2.01718	0.270475
00000007_1.tif	CX7389	Control	14.846	5.208	5.81759	6.76088	0.943295	1	0.29777	2.01319	0.266681
00000007_1.tif	CX7389	Control	14.297	5.799	5.81759	6.14414	0.326558	1	0.29777	1.82954	0.092322
00000007_1.tif	CX7389	Control	8.115	5.804	5.81759	8.68256	2.86498	1	0.29777	2.58541	0.809965
00000007_1.tif	CX7389	Control	19.218	6.593	5.81759	7.29752	1.47994	1	0.29777	2.17298	0.418397
00000007_1.tif	CX7389	Control	19.336	6.609	5.81759	7.36669	1.5491	1	0.29777	2.19358	0.437951
00000007_1.tif	CX7389	Control	21.461	6.802	5.81759	8.85191	3.03433	1	0.29777	2.63583	0.857841
00000007_1.tif	CX7389	Control	13.833	6.932	5.81759	5.02874	-0.788847	0	0.29777	1.49741	-0.223017
00000007_1.tif	CX7389	Control	14.001	6.951	5.81759	4.99846	-0.819128	0	0.29777	1.48839	-0.231577
00000007_1.tif	CX7389	Control	21.478	6.992	5.81759	8.75695	2.93936	1	0.29777	2.60756	0.830994
00000007_1.tif	CX7389	Control	16.511	7.129	5.81759	5.3164	-0.501183	0	0.29777	1.58307	-0.141691
00000007_1.tif	CX7389	Control	21.379	7.162	5.81759	8.57959	2.762	1	0.29777	2.55474	0.780852
00000007_1.tif	CX7389	Control	16.369	7.266	5.81759	5.13257	-0.68501	0	0.29777	1.52833	-0.193661
00000007_1.tif	CX7389	Control	7.824	7.261	5.81759	7.9548	2.13722	1	0.29777	2.3687	0.604217
00000007_1.tif	CX7389	Control	14.63	7.478	5.81759	4.48072	-1.33687	0	0.29777	1.33422	-0.377948
00000007_1.tif	CX7389	Control	10.229	7.543	5.81759	5.96395	0.146363	1	0.29777	1.77588	0.0413785
00000007_1.tif	CX7389	Control	10.884	7.564	5.81759	5.52624	-0.29135	0	0.29777	1.64555	-0.0823681
00000007_1.tif	CX7389	Control	10.333	7.581	5.81759	5.86593	0.0483441	1	0.29777	1.7467	0.0136675
00000007_1.tif	CX7389	Control	10.155	7.693	5.81759	5.90529	0.0877089	1	0.29777	1.75842	0.0247964
00000007_1.tif	CX7389	Control	10.71	7.764	5.81759	5.48006	-0.337525	0	0.29777	1.6318	-0.0954223
00000007_1.tif	CX7389	Control	10.764	7.799	5.81759	5.41847	-0.399115	0	0.29777	1.61346	-0.112835
00000007_1.tif	CX7389	Control	10.913	8.003	5.81759	5.16648	-0.651101	0	0.29777	1.53842	-0.184074
00000007_1.tif	CX7389	Control	17.37	8.073	5.81759	4.96791	-0.849676	0	0.29777	1.47929	-0.240214
00000007_1.tif	CX7389	Control	14.146	8.514	5.81759	3.43073	-2.38685	0	0.29777	1.02157	-0.674793
00000007_1.tif	CX7389	Control	11.496	9.601	5.81759	3.61898	-2.1986	0	0.29777	1.07762	-0.621571
00000007_1.tif	CX7389	Control	11.484	9.725	5.81759	3.54936	-2.26822	0	0.29777	1.05689	-0.641255
00000007_1.tif	CX7389	Control	20.01	10.476	5.81759	5.93903	0.121448	1	0.29777	1.76847	0.0343348
00000007_1.tif	CX7389	Control	18.352	10.952	5.81759	4.21515	-1.60244	0	0.29777	1.25515	-0.453028
00000007_1.tif	CX7389	Control	18.399	11.319	5.81759	4.19072	-1.62687	0	0.29777	1.24787	-0.459935
00000007_1.tif	CX7389	Control	9.851	11.49	5.81759	4.42724	-1.39035	0	0.29777	1.3183	-0.393069
00000007_1.tif	CX7389	Control	9.99	11.882	5.81759	4.26544	-1.55215	0	0.29777	1.27012	-0.438812
00000007_1.tif	CX7389	Control	19.481	12.181	5.81759	5.23142	-0.586169	0	0.29777	1.55776	-0.165717
00000007_1.tif	CX7389	Control	23.177	12.473	5.81759	8.93773	3.12014	1	0.29777	2.66139	0.882103
00000007_1.tif	CX7389	Control	23.133	12.655	5.81759	8.9065	3.08892	1	0.29777	2.65209	0.873275
00000007_1.tif	CX7389	Control	16.173	13.121	5.81759	2.25087	-3.56672	0	0.29777	0.670241	-1.00835
00000007_1.tif	CX7389	Control	9.918	13.198	5.81759	4.51493	-1.30266	0	0.29777	1.34441	-0.368277
00000007_1.tif	CX7389	Control	16.156	13.208	5.81759	2.28342	-3.53416	0	0.29777	0.679935	-0.999151
00000007_1.tif	CX7389	Control	16.13	13.328	5.81759	2.33106	-3.48652	0	0.29777	0.69412	-0.985683
00000007_1.tif	CX7389	Control	8.932	13.944	5.81759	5.68668	-0.130905	0	0.29777	1.69332	-0.0370085
00000007_1.tif	CX7389	Control	10.402	14.012	5.81759	4.37337	-1.44421	0	0.29777	1.30226	-0.408297
00000007_1.tif	CX7389	Control	7.342	14.205	5.81759	7.27367	1.45608	1	0.29777	2.16588	0.411652
00000007_1.tif	CX7389	Control	11.85	14.741	5.81759	3.68956	-2.12803	0	0.29777	1.09864	-0.60162
00000007_1.tif	CX7389	Control	9.691	14.822	5.81759	5.39618	-0.421407	0	0.29777	1.60682	-0.119137
00000007_1.tif	CX7389	Control	18.236	14.8	5.81759	4.90008	-0.917503	0	0.29777	1.4591	-0.259389
00000007_1.tif	CX7389	Control	12.428	14.86	5.81759	3.44192	-2.37566	0	0.29777	1.0249	-0.671629
00000007_1.tif	CX7389	Control	11.889	14.993	5.81759	3.86011	-1.95747	0	0.29777	1.14943	-0.553402
00000007_1.tif	CX7389	Control	12.314	15.059	5.81759	3.67109	-2.14649	0	0.29777	1.09314	-0.606839
00000007_1.tif	CX7389	Control	12.38	15.42	5.81759	3.95034	-1.86725	0	0.29777	1.17629	-0.527894
00000007_1.tif	CX7389	Control	19.218	15.407	5.81759	6.05233	0.234742	1	0.29777	1.8022	0.0663644
00000007_1.tif	CX7389	Control	12.196	15.429	5.81759	4.04866	-1.76892	0	0.29777	1.20557	-0.500096
00000007_1.tif	CX7389	Control	6.758	15.903	5.81759	8.4786	2.66101	1	0.29777	2.52467	0.752301
00000007_1.tif	CX7389	Control	14.967	15.924	5.81759	4.04417	-1.77342	0	0.29777	1.20423	-0.501366
00000007_1.tif	CX7389	Control	9.583	15.965	5.81759	6.16474	0.347159	1	0.29777	1.83568	0.098146
00000007_1.tif	CX7389	Control	6.62	16.043	5.81759	8.66621	2.84863	1	0.29777	2.58054	0.805342
00000007_1.tif	CX7389	Control	16.163	16.068	5.81759	4.5449	-1.27269	0	0.29777	1.35333	-0.359805
00000007_1.tif	CX7389	Control	15.225	16.587	5.81759	4.74422	-1.07336	0	0.29777	1.41269	-0.303453
00000007_1.tif	CX7389	Control	6.366	16.705	5.81759	9.21482	3.39724	1	0.29777	2.7439	0.960441
00000007_1.tif	CX7389	Control	6.422	16.777	5.81759	9.20453	3.38695	1	0.29777	2.74083	0.957532
00000007_1.tif	CX7389	Control	6.887	17.253	5.81759	9.08204	3.26446	1	0.29777	2.70436	0.922902
00000007_1.tif	CX7389	Control	11.416	18.069	5.81759	6.75187	0.934288	1	0.29777	2.01051	0.264135
00000007_1.tif	CX7389	Control	19.432	18.332	5.81759	8.22318	2.40559	1	0.29777	2.44862	0.68009
00000007_1.tif	CX7389	Control	7.284	19.251	5.81759	10.0996	4.282	1	0.29777	3.00735	1.21057
00000007_1.tif	CX7389	Control	7.336	19.248	5.81759	10.0616	4.244	1	0.29777	2.99604	1.19983
00000007_1.tif	CX7389	Control	7.547	19.316	5.81759	9.96787	4.15028	1	0.29777	2.96813	1.17334
00000007_1.tif	CX7389	Control	19.005	19.638	5.81759	9.04298	3.2254	1	0.29777	2.69273	0.911859
00000007_1.tif	CX7389	Control	18.956	19.832	5.81759	9.18345	3.36586	1	0.29777	2.73456	0.951571
00000007_1.tif	CX7389	Control	18.929	19.908	5.81759	9.23512	3.41754	1	0.29777	2.74994	0.96618
00000007_1.tif	CX7389	Control	19.025	20.109	5.81759	9.45708	3.6395	1	0.29777	2.81604	1.02893
00000007_1.tif	CX7389	Control	19.018	20.16	5.81759	9.49764	3.68006	1	0.29777	2.82811	1.0404
00000007_1.tif	CX7389	Control	15.523	20.893	5.81759	9.03938	3.22179	1	0.29777	2.69166	0.91084
00000007_1.tif	CX7389	Control	15.445	21.178	5.81759	9.31135	3.49377	1	0.29777	2.77264	0.987731
00000007_1.tif	CX7389	Control	15.203	21.287	5.81759	9.39197	3.57438	1	0.29777	2.79665	1.01052
00000008_3.tif	CX7389	Control	12.275	2.227	5.72404	10.4099	4.68591	1	0.29777	3.09977	1.32476
00000008_3.tif	CX7389	Control	12.307	2.296	5.72404	10.334	4.60995	1	0.29777	3.07715	1.30329
00000008_3.tif	CX7389	Control	20.052	2.512	5.72404	10.1397	4.41568	1	0.29777	3.0193	1.24837
00000008_3.tif	CX7389	Control	19.715	3.103	5.72404	9.46512	3.74109	1	0.29777	2.81843	1.05765
00000008_3.tif	CX7389	Control	14.651	3.562	5.72404	8.45592	2.73188	1	0.29777	2.51792	0.772337
00000008_3.tif	CX7389	Control	14.506	3.568	5.72404	8.47732	2.75328	1	0.29777	2.52429	0.778386
00000008_3.tif	CX7389	Control	10.983	4.041	5.72404	9.40083	3.6768	1	0.29777	2.79929	1.03948
00000008_3.tif	CX7389	Control	10.802	4.081	5.72404	9.46897	3.74493	1	0.29777	2.81957	1.05874
00000008_3.tif	CX7389	Control	10.905	4.145	5.72404	9.35797	3.63393	1	0.29777	2.78652	1.02736
00000008_3.tif	CX7389	Control	17.894	4.485	5.72404	7.59285	1.86881	1	0.29777	2.26092	0.528335
00000008_3.tif	CX7389	Control	20.246	4.694	5.72404	8.26051	2.53648	1	0.29777	2.45973	0.717093
00000008_3.tif	CX7389	Control	11.77	4.743	5.72404	8.38537	2.66133	1	0.29777	2.49691	0.752391
00000008_3.tif	CX7389	Control	18.007	5.146	5.72404	6.97954	1.2555	1	0.29777	2.0783	0.354946
00000008_3.tif	CX7389	Control	17.943	5.207	5.72404	6.90401	1.17997	1	0.29777	2.05581	0.333593
00000008_3.tif	CX7389	Control	13.4	5.215	5.72404	7.21846	1.49443	1	0.29777	2.14944	0.422493
00000008_3.tif	CX7389	Control	13.087	5.257	5.72404	7.30625	1.58222	1	0.29777	2.17558	0.447312
00000008_3.tif	CX7389	Control	13.264	5.29	5.72404	7.20309	1.47906	1	0.29777	2.14487	0.418148
00000008_3.tif	CX7389	Control	13.114	5.309	5.72404	7.24772	1.52368	1	0.29777	2.15815	0.430763
00000008_3.tif	CX7389	Control	13.267	5.419	5.72404	7.08403	1.36	1	0.29777	2.10941	0.384488
00000008_3.tif	CX7389	Control	21.801	5.627	5.72404	8.41342	2.68938	1	0.29777	2.50526	0.760322
00000008_3.tif	CX7389	Control	19.74	5.679	5.72404	7.15423	1.43019	1	0.29777	2.13032	0.404334
00000008_3.tif	CX7389	Control	14.11	6.521	5.72404	5.74201	0.0179777	1	0.29777	1.7098	0.00508252
00000008_3.tif	CX7389	Control	14.053	6.892	5.72404	5.41944	-0.304599	0	0.29777	1.61375	-0.0861137
00000008_3.tif	CX7389	Control	14.118	6.914	5.72404	5.37402	-0.350018	0	0.29777	1.60022	-0.0989544
00000008_3.tif	CX7389	Control	15.366	7.258	5.72404	4.69175	-1.03229	0	0.29777	1.39706	-0.29184
00000008_3.tif	CX7389	Control	11.076	7.456	5.72404	6.74841	1.02437	1	0.29777	2.00947	0.289602
00000008_3.tif	CX7389	Control	12.945	7.558	5.72404	5.39381	-0.330224	0	0.29777	1.60612	-0.0933583
00000008_3.tif	CX7389	Control	18.67	7.591	5.72404	4.96342	-0.760618	0	0.29777	1.47796	-0.215036
00000008_3.tif	CX7389	Control	12.955	7.703	5.72404	5.27223	-0.451805	0	0.29777	1.56991	-0.127731
00000008_3.tif	CX7389	Control	12.761	7.732	5.72404	5.37037	-0.353671	0	0.29777	1.59913	-0.0999871
00000008_3.tif	CX7389	Control	19.479	7.719	5.72404	5.31509	-0.408947	0	0.29777	1.58267	-0.115614
00000008_3.tif	CX7389	Control	11.681	7.781	5.72404	6.08037	0.356332	1	0.29777	1.81055	0.100739
00000008_3.tif	CX7389	Control	17.869	7.816	5.72404	4.40408	-1.31996	0	0.29777	1.3114	-0.373168
00000008_3.tif	CX7389	Control	16.246	7.89	5.72404	3.99069	-1.73335	0	0.29777	1.18831	-0.490039
00000008_3.tif	CX7389	Control	16.524	7.87	5.72404	4.02542	-1.69862	0	0.29777	1.19865	-0.48022
00000008_3.tif	CX7389	Control	14.972	7.976	5.72404	4.08426	-1.63977	0	0.29777	1.21617	-0.463584
00000008_3.tif	CX7389	Control	18.494	7.977	5.72404	4.54149	-1.18255	0	0.29777	1.35232	-0.334321
00000008_3.tif	CX7389	Control	15.128	8.009	5.72404	4.00931	-1.71473	0	0.29777	1.19385	-0.484774
00000008_3.tif	CX7389	Control	13.108	8.056	5.72404	4.90011	-0.823927	0	0.29777	1.45911	-0.232934
00000008_3.tif	CX7389	Control	17.158	8.027	5.72404	3.97716	-1.74688	0	0.29777	1.18428	-0.493863
00000008_3.tif	CX7389	Control	10.533	8.289	5.72404	6.68533	0.961291	1	0.29777	1.99069	0.271769
00000008_3.tif	CX7389	Control	17.3	8.335	5.72404	3.72014	-2.0039	0	0.29777	1.10774	-0.566527
00000008_3.tif	CX7389	Control	15.098	8.479	5.72404	3.56655	-2.15749	0	0.29777	1.06201	-0.609948
00000008_3.tif	CX7389	Control	14.523	8.486	5.72404	3.77339	-1.95065	0	0.29777	1.1236	-0.551473
00000008_3.tif	CX7389	Control	14.775	8.537	5.72404	3.62316	-2.10088	0	0.29777	1.07887	-0.593945
00000008_3.tif	CX7389	Control	14.003	8.654	5.72404	3.88737	-1.83667	0	0.29777	1.15754	-0.519248
00000008_3.tif	CX7389	Control	13.135	8.606	5.72404	4.4657	-1.25834	0	0.29777	1.32975	-0.355748
00000008_3.tif	CX7389	Control	12.829	8.706	5.72404	4.60976	-1.11427	0	0.29777	1.37265	-0.315018
00000008_3.tif	CX7389	Control	12.904	8.712	5.72404	4.55149	-1.17255	0	0.29777	1.3553	-0.331494
00000008_3.tif	CX7389	Control	12.764	8.764	5.72404	4.61778	-1.10625	0	0.29777	1.37504	-0.312751
00000008_3.tif	CX7389	Control	11.944	8.774	5.72404	5.24626	-0.477779	0	0.29777	1.56218	-0.135074
00000008_3.tif	CX7389	Control	15.275	8.807	5.72404	3.20124	-2.5228	0	0.29777	0.953233	-0.713225
00000008_3.tif	CX7389	Control	18.614	8.801	5.72404	3.92984	-1.7942	0	0.29777	1.17019	-0.507243
00000008_3.tif	CX7389	Control	13.055	8.825	5.72404	4.36448	-1.35955	0	0.29777	1.29961	-0.384362
00000008_3.tif	CX7389	Control	13.975	8.922	5.72404	3.68464	-2.0394	0	0.29777	1.09718	-0.576562
00000008_3.tif	CX7389	Control	14.217	8.915	5.72404	3.55151	-2.17252	0	0.29777	1.05753	-0.614199
00000008_3.tif	CX7389	Control	13.074	8.966	5.72404	4.25312	-1.47092	0	0.29777	1.26645	-0.415847
00000008_3.tif	CX7389	Control	16.027	9.004	5.72404	2.87965	-2.84438	0	0.29777	0.857474	-0.804142
00000008_3.tif	CX7389	Control	12.87	9.076	5.72404	4.33193	-1.39211	0	0.29777	1.28992	-0.393565
00000008_3.tif	CX7389	Control	14.007	9.15	5.72404	3.48427	-2.23977	0	0.29777	1.03751	-0.63321
00000008_3.tif	CX7389	Control	13.876	9.207	5.72404	3.52371	-2.20032	0	0.29777	1.04926	-0.622059
00000008_3.tif	CX7389	Control	7.455	9.239	5.72404	9.10829	3.38425	1	0.29777	2.71218	0.95677
00000008_3.tif	CX7389	Control	14.895	9.287	5.72404	2.89039	-2.83364	0	0.29777	0.860673	-0.801105
00000008_3.tif	CX7389	Control	16.323	9.324	5.72404	2.56046	-3.16358	0	0.29777	0.762427	-0.894383
00000008_3.tif	CX7389	Control	17.101	9.36	5.72404	2.68578	-3.03825	0	0.29777	0.799746	-0.858951
00000008_3.tif	CX7389	Control	12.591	9.387	5.72404	4.36333	-1.36071	0	0.29777	1.29927	-0.38469
00000008_3.tif	CX7389	Control	13.915	9.442	5.72404	3.32233	-2.4017	0	0.29777	0.989291	-0.678991
00000008_3.tif	CX7389	Control	6.319	9.506	5.72404	10.135	4.41093	1	0.29777	3.01789	1.24702
00000008_3.tif	CX7389	Control	21.849	9.512	5.72404	6.15108	0.427041	1	0.29777	1.83161	0.12073
00000008_3.tif	CX7389	Control	13.967	9.57	5.72404	3.19345	-2.53059	0	0.29777	0.950914	-0.715428
00000008_3.tif	CX7389	Control	19.249	9.569	5.72404	3.8482	-1.87584	0	0.29777	1.14588	-0.530322
00000008_3.tif	CX7389	Control	17.975	9.694	5.72404	2.83362	-2.89042	0	0.29777	0.843767	-0.817156
00000008_3.tif	CX7389	Control	16.929	9.786	5.72404	2.22663	-3.49741	0	0.29777	0.663024	-0.988759
00000008_3.tif	CX7389	Control	14.533	9.833	5.72404	2.62231	-3.10172	0	0.29777	0.780846	-0.876895
00000008_3.tif	CX7389	Control	14.974	9.922	5.72404	2.29542	-3.42861	0	0.29777	0.683508	-0.969311
00000008_3.tif	CX7389	Control	17.049	9.944	5.72404	2.12538	-3.59866	0	0.29777	0.632873	-1.01739
00000008_3.tif	CX7389	Control	19.201	9.974	5.72404	3.57878	-2.14525	0	0.29777	1.06565	-0.60649
00000008_3.tif	CX7389	Control	16.962	10.042	5.72404	2.00059	-3.72345	0	0.29777	0.595714	-1.05266
00000008_3.tif	CX7389	Control	12.935	10.062	5.72404	3.71259	-2.01145	0	0.29777	1.1055	-0.568662
00000008_3.tif	CX7389	Control	8.252	10.792	5.72404	7.99438	2.27035	1	0.29777	2.38049	0.641855
00000008_3.tif	CX7389	Control	18.803	10.851	5.72404	2.82507	-2.89897	0	0.29777	0.84122	-0.819574
00000008_3.tif	CX7389	Control	8.105	10.901	5.72404	8.12619	2.40215	1	0.29777	2.41973	0.679118
00000008_3.tif	CX7389	Control	12.488	10.994	5.72404	3.78904	-1.93499	0	0.29777	1.12826	-0.547046
00000008_3.tif	CX7389	Control	17.604	11.154	5.72404	1.60552	-4.11851	0	0.29777	0.478076	-1.16435
00000008_3.tif	CX7389	Control	19.067	11.166	5.72404	2.98175	-2.74229	0	0.29777	0.887875	-0.775278
00000008_3.tif	CX7389	Control	14.094	11.347	5.72404	2.14527	-3.57877	0	0.29777	0.638796	-1.01176
00000008_3.tif	CX7389	Control	14.062	11.409	5.72404	2.16193	-3.56211	0	0.29777	0.643758	-1.00705
00000008_3.tif	CX7389	Control	2.065	11.702	5.72404	14.1081	8.38409	1	0.29777	4.20098	2.37028
00000008_3.tif	CX7389	Control	19.746	11.783	5.72404	3.57532	-2.14872	0	0.29777	1.06462	-0.607469
00000008_3.tif	CX7389	Control	19.965	12.068	5.72404	3.79766	-1.92638	0	0.29777	1.13083	-0.544611
00000008_3.tif	CX7389	Control	9.052	12.151	5.72404	7.12516	1.40112	1	0.29777	2.12166	0.396114
00000008_3.tif	CX7389	Control	14.527	12.21	5.72404	1.67777	-4.04626	0	0.29777	0.499591	-1.14393
00000008_3.tif	CX7389	Control	12.473	12.236	5.72404	3.71609	-2.00794	0	0.29777	1.10654	-0.567671
00000008_3.tif	CX7389	Control	19.695	12.209	5.72404	3.53833	-2.18571	0	0.29777	1.05361	-0.617926
00000008_3.tif	CX7389	Control	8.921	12.237	5.72404	7.25978	1.53575	1	0.29777	2.16175	0.434174
00000008_3.tif	CX7389	Control	8.971	12.265	5.72404	7.21128	1.48725	1	0.29777	2.1473	0.420463
00000008_3.tif	CX7389	Control	17.813	12.298	5.72404	1.6934	-4.03064	0	0.29777	0.504244	-1.13951
00000008_3.tif	CX7389	Control	12.353	12.297	5.72404	3.8417	-1.88234	0	0.29777	1.14394	-0.53216
00000008_3.tif	CX7389	Control	17.02	12.584	5.72404	1.10214	-4.62189	0	0.29777	0.328185	-1.30667
00000008_3.tif	CX7389	Control	19.668	12.592	5.72404	3.56777	-2.15627	0	0.29777	1.06237	-0.609604
00000008_3.tif	CX7389	Control	20.775	13.049	5.72404	4.74912	-0.974913	0	0.29777	1.41415	-0.27562
00000008_3.tif	CX7389	Control	21.596	13.086	5.72404	5.55646	-0.16758	0	0.29777	1.65455	-0.0473768
00000008_3.tif	CX7389	Control	20.559	13.113	5.72404	4.55698	-1.16706	0	0.29777	1.35693	-0.329941
00000008_3.tif	CX7389	Control	8.581	13.148	5.72404	7.69617	1.97214	1	0.29777	2.29169	0.557548
00000008_3.tif	CX7389	Control	13.687	13.264	5.72404	2.84441	-2.87962	0	0.29777	0.846981	-0.814105
00000008_3.tif	CX7389	Control	13.892	13.292	5.72404	2.68182	-3.04222	0	0.29777	0.798565	-0.860073
00000008_3.tif	CX7389	Control	17.551	13.342	5.72404	2.00975	-3.71429	0	0.29777	0.598443	-1.05007
00000008_3.tif	CX7389	Control	13.589	13.513	5.72404	3.05591	-2.66813	0	0.29777	0.909958	-0.754312
00000008_3.tif	CX7389	Control	17.367	13.723	5.72404	2.19651	-3.52752	0	0.29777	0.654056	-0.997274
00000008_3.tif	CX7389	Control	20.186	13.879	5.72404	4.48422	-1.23982	0	0.29777	1.33527	-0.350512
00000008_3.tif	CX7389	Control	15.226	14.029	5.72404	2.348	-3.37603	0	0.29777	0.699165	-0.954446
00000008_3.tif	CX7389	Control	6.575	14.032	5.72404	9.83532	4.11128	1	0.29777	2.92866	1.16231
00000008_3.tif	CX7389	Control	13.547	14.089	5.72404	3.43079	-2.29325	0	0.29777	1.02159	-0.648329
00000008_3.tif	CX7389	Control	6.743	14.09	5.72404	9.68453	3.96049	1	0.29777	2.88376	1.11968
00000008_3.tif	CX7389	Control	15.143	14.157	5.72404	2.49871	-3.22532	0	0.29777	0.744042	-0.911838
00000008_3.tif	CX7389	Control	8.6	14.103	5.72404	7.89157	2.16754	1	0.29777	2.34987	0.612789
00000008_3.tif	CX7389	Control	23.304	14.12	5.72404	7.47549	1.75146	1	0.29777	2.22598	0.495159
00000008_3.tif	CX7389	Control	8.588	14.167	5.72404	7.92133	2.19729	1	0.29777	2.35873	0.621201
00000008_3.tif	CX7389	Control	23.069	14.209	5.72404	7.27962	1.55558	1	0.29777	2.16765	0.439782
00000008_3.tif	CX7389	Control	14.02	14.277	5.72404	3.22129	-2.50275	0	0.29777	0.959204	-0.707557
00000008_3.tif	CX7389	Control	22.996	14.551	5.72404	7.32811	1.60408	1	0.29777	2.18209	0.453492
00000008_3.tif	CX7389	Control	23.018	14.632	5.72404	7.37843	1.65439	1	0.29777	2.19707	0.467717
00000008_3.tif	CX7389	Control	13.177	14.734	5.72404	4.13707	-1.58697	0	0.29777	1.2319	-0.448655
00000008_3.tif	CX7389	Control	15.654	14.738	5.72404	2.90456	-2.81947	0	0.29777	0.864892	-0.7971
00000008_3.tif	CX7389	Control	12.889	14.784	5.72404	4.38307	-1.34097	0	0.29777	1.30515	-0.379107
00000008_3.tif	CX7389	Control	19.138	14.766	5.72404	4.13838	-1.58566	0	0.29777	1.23228	-0.448286
00000008_3.tif	CX7389	Control	15.941	14.894	5.72404	3.02284	-2.7012	0	0.29777	0.900111	-0.763661
00000008_3.tif	CX7389	Control	13.054	14.931	5.72404	4.3624	-1.36164	0	0.29777	1.29899	-0.384952
00000008_3.tif	CX7389	Control	20.658	15.041	5.72404	5.48782	-0.236221	0	0.29777	1.63411	-0.0667826
00000008_3.tif	CX7389	Control	15.765	15.054	5.72404	3.19999	-2.52405	0	0.29777	0.952861	-0.713579
00000008_3.tif	CX7389	Control	20.697	15.122	5.72404	5.56652	-0.157512	0	0.29777	1.65754	-0.0445307
00000008_3.tif	CX7389	Control	15.85	15.137	5.72404	3.27288	-2.45116	0	0.29777	0.974565	-0.692972
00000008_3.tif	CX7389	Control	20.793	15.367	5.72404	5.78902	0.0649887	1	0.29777	1.7238	0.0183731
00000008_3.tif	CX7389	Control	11.844	15.411	5.72404	5.58566	-0.138381	0	0.29777	1.66324	-0.039122
00000008_3.tif	CX7389	Control	18.19	15.415	5.72404	4.07045	-1.65359	0	0.29777	1.21206	-0.46749
00000008_3.tif	CX7389	Control	11.741	15.436	5.72404	5.68145	-0.0425843	0	0.29777	1.69177	-0.0120391
00000008_3.tif	CX7389	Control	19.609	15.484	5.72404	4.98014	-0.743897	0	0.29777	1.48294	-0.210309
00000008_3.tif	CX7389	Control	11.733	15.488	5.72404	5.72035	-0.00368797	0	0.29777	1.70335	-0.00104263
00000008_3.tif	CX7389	Control	10.596	15.565	5.72404	6.68364	0.959601	1	0.29777	1.99019	0.271291
00000008_3.tif	CX7389	Control	15.042	15.968	5.72404	4.2413	-1.48273	0	0.29777	1.26293	-0.419187
00000008_3.tif	CX7389	Control	22.324	16.081	5.72404	7.44953	1.72549	1	0.29777	2.21825	0.487818
00000008_3.tif	CX7389	Control	17.025	16.125	5.72404	4.32985	-1.39418	0	0.29777	1.2893	-0.394152
00000008_3.tif	CX7389	Control	16.376	16.163	5.72404	4.28786	-1.43618	0	0.29777	1.27679	-0.406026
00000008_3.tif	CX7389	Control	17.008	16.27	5.72404	4.46889	-1.25514	0	0.29777	1.3307	-0.354845
00000008_3.tif	CX7389	Control	7.062	16.281	5.72404	10.1174	4.39332	1	0.29777	3.01265	1.24205
00000008_3.tif	CX7389	Control	15.269	16.318	5.72404	4.52894	-1.1951	0	0.29777	1.34858	-0.33787
00000008_3.tif	CX7389	Control	15.273	16.4	5.72404	4.60854	-1.1155	0	0.29777	1.37228	-0.315366
00000008_3.tif	CX7389	Control	15.48	16.451	5.72404	4.62308	-1.10095	0	0.29777	1.37662	-0.311253
00000008_3.tif	CX7389	Control	23.132	16.466	5.72404	8.33505	2.61101	1	0.29777	2.48193	0.738164
00000008_3.tif	CX7389	Control	12.801	16.684	5.72404	5.86874	0.144699	1	0.29777	1.74753	0.0409083
00000008_3.tif	CX7389	Control	12.575	16.827	5.72404	6.11647	0.392435	1	0.29777	1.8213	0.110946
00000008_3.tif	CX7389	Control	12.753	16.821	5.72404	6.00858	0.284544	1	0.29777	1.78918	0.0804442
00000008_3.tif	CX7389	Control	14.647	16.893	5.72404	5.23983	-0.484209	0	0.29777	1.56026	-0.136892
00000008_3.tif	CX7389	Control	7.335	17.21	5.72404	10.32	4.59592	1	0.29777	3.07297	1.29932
00000008_3.tif	CX7389	Control	14.245	17.249	5.72404	5.70434	-0.0196967	0	0.29777	1.69858	-0.0055685
00000008_3.tif	CX7389	Control	21.872	18.725	5.72404	8.90753	3.18349	1	0.29777	2.65239	0.900012
00000008_3.tif	CX7389	Control	16.229	18.954	5.72404	7.07423	1.35019	1	0.29777	2.10649	0.381716
00000008_3.tif	CX7389	Control	14.759	19.132	5.72404	7.38837	1.66434	1	0.29777	2.20004	0.470529
00000008_3.tif	CX7389	Control	14.927	19.165	5.72404	7.39062	1.66658	1	0.29777	2.2007	0.471163
00000008_3.tif	CX7389	Control	16.201	19.148	5.72404	7.26806	1.54402	1	0.29777	2.16421	0.436514
00000014_2.tif	CX7389	Control	8.318	3.951	5.8491	9.28407	3.43497	1	0.29777	2.76452	0.971108
00000014_2.tif	CX7389	Control	8.44	4.192	5.8491	9.01541	3.16631	1	0.29777	2.68452	0.895155
00000014_2.tif	CX7389	Control	9.856	5.722	5.8491	7.12521	1.27611	1	0.29777	2.12167	0.360773
00000014_2.tif	CX7389	Control	9.987	5.827	5.8491	6.99146	1.14237	1	0.29777	2.08185	0.322961
00000014_2.tif	CX7389	Control	8.261	5.924	5.8491	7.50072	1.65162	1	0.29777	2.23349	0.466934
00000014_2.tif	CX7389	Control	6.699	6.089	5.8491	8.19007	2.34098	1	0.29777	2.43876	0.661823
00000014_2.tif	CX7389	Control	6.643	6.089	5.8491	8.22399	2.37489	1	0.29777	2.44886	0.67141
00000014_2.tif	CX7389	Control	5.226	7.183	5.8491	8.40911	2.56002	1	0.29777	2.50398	0.723748
00000014_2.tif	CX7389	Control	16.061	7.257	5.8491	6.94969	1.10059	1	0.29777	2.06941	0.31115
00000014_2.tif	CX7389	Control	16.152	7.383	5.8491	6.91197	1.06287	1	0.29777	2.05818	0.300486
00000014_2.tif	CX7389	Control	10.114	7.383	5.8491	5.45508	-0.394018	0	0.29777	1.62436	-0.111394
00000014_2.tif	CX7389	Control	10.099	7.434	5.8491	5.41039	-0.438704	0	0.29777	1.61105	-0.124027
00000014_2.tif	CX7389	Control	16.196	7.451	5.8491	6.8896	1.0405	1	0.29777	2.05152	0.294163
00000014_2.tif	CX7389	Control	10.102	7.519	5.8491	5.32811	-0.520991	0	0.29777	1.58655	-0.147291
00000014_2.tif	CX7389	Control	10.168	7.513	5.8491	5.31518	-0.533914	0	0.29777	1.5827	-0.150944
00000014_2.tif	CX7389	Control	10.139	7.603	5.8491	5.23701	-0.612086	0	0.29777	1.55943	-0.173044
00000014_2.tif	CX7389	Control	5.163	7.74	5.8491	8.11042	2.26132	1	0.29777	2.41504	0.639303
00000014_2.tif	CX7389	Control	11.936	7.81	5.8491	4.81904	-1.03006	0	0.29777	1.43496	-0.291211
00000014_2.tif	CX7389	Control	11.971	7.96	5.8491	4.67167	-1.17743	0	0.29777	1.39108	-0.332873
00000014_2.tif	CX7389	Control	2.082	8.292	5.8491	10.4931	4.64405	1	0.29777	3.12454	1.31293
00000014_2.tif	CX7389	Control	14.505	8.326	5.8491	5.16149	-0.687612	0	0.29777	1.53694	-0.194396
00000014_2.tif	CX7389	Control	14.591	8.372	5.8491	5.17185	-0.677251	0	0.29777	1.54002	-0.191467
00000014_2.tif	CX7389	Control	14.733	8.48	5.8491	5.16721	-0.681887	0	0.29777	1.53864	-0.192778
00000014_2.tif	CX7389	Control	20.004	8.509	5.8491	9.3188	3.46971	1	0.29777	2.77486	0.980928
00000014_2.tif	CX7389	Control	14.327	8.607	5.8491	4.82895	-1.02015	0	0.29777	1.43792	-0.288408
00000014_2.tif	CX7389	Control	14.568	8.64	5.8491	4.94042	-0.90868	0	0.29777	1.47111	-0.256895
00000014_2.tif	CX7389	Control	12.076	8.775	5.8491	3.86953	-1.97957	0	0.29777	1.15223	-0.559649
00000014_2.tif	CX7389	Control	14.707	8.796	5.8491	4.90136	-0.947738	0	0.29777	1.45948	-0.267937
00000014_2.tif	CX7389	Control	14.5	8.878	5.8491	4.70919	-1.13991	0	0.29777	1.40225	-0.322267
00000014_2.tif	CX7389	Control	16.773	8.893	5.8491	6.34255	0.493453	1	0.29777	1.88862	0.139505
00000014_2.tif	CX7389	Control	8.932	8.949	5.8491	4.56234	-1.28676	0	0.29777	1.35853	-0.363783
00000014_2.tif	CX7389	Control	10.546	8.952	5.8491	3.82796	-2.02114	0	0.29777	1.13985	-0.571401
00000014_2.tif	CX7389	Control	10.323	9.035	5.8491	3.8196	-2.0295	0	0.29777	1.13736	-0.573764
00000014_2.tif	CX7389	Control	9.222	9.085	5.8491	4.28343	-1.56567	0	0.29777	1.27548	-0.442633
00000014_2.tif	CX7389	Control	10.009	9.135	5.8491	3.8482	-2.0009	0	0.29777	1.14588	-0.565678
00000014_2.tif	CX7389	Control	11.237	9.17	5.8491	3.47357	-2.37552	0	0.29777	1.03433	-0.67159
00000014_2.tif	CX7389	Control	9.272	9.247	5.8491	4.12181	-1.72729	0	0.29777	1.22735	-0.488326
00000014_2.tif	CX7389	Control	8.538	9.241	5.8491	4.58762	-1.26148	0	0.29777	1.36606	-0.356635
00000014_2.tif	CX7389	Control	17.498	9.274	5.8491	6.74538	0.896283	1	0.29777	2.00857	0.25339
00000014_2.tif	CX7389	Control	19.432	9.312	5.8491	8.46419	2.61509	1	0.29777	2.52038	0.739319
00000014_2.tif	CX7389	Control	9.481	9.339	5.8491	3.92818	-1.92092	0	0.29777	1.16969	-0.543068
00000014_2.tif	CX7389	Control	9.513	9.376	5.8491	3.87968	-1.96942	0	0.29777	1.15525	-0.556778
00000014_2.tif	CX7389	Control	17.734	9.473	5.8491	6.85772	1.00862	1	0.29777	2.04202	0.285148
00000014_2.tif	CX7389	Control	16.025	9.551	5.8491	5.35147	-0.497629	0	0.29777	1.59351	-0.140686
00000014_2.tif	CX7389	Control	9.29	9.636	5.8491	3.79888	-2.05022	0	0.29777	1.13119	-0.579623
00000014_2.tif	CX7389	Control	10.261	9.621	5.8491	3.30127	-2.54783	0	0.29777	0.98302	-0.720301
00000014_2.tif	CX7389	Control	16.046	9.811	5.8491	5.22441	-0.624684	0	0.29777	1.55567	-0.176606
00000014_2.tif	CX7389	Control	12.702	9.841	5.8491	2.97465	-2.87444	0	0.29777	0.885763	-0.812641
00000014_2.tif	CX7389	Control	16.914	9.892	5.8491	5.93688	0.0877794	1	0.29777	1.76782	0.0248163
00000014_2.tif	CX7389	Control	16.803	9.902	5.8491	5.83385	-0.0152512	0	0.29777	1.73714	-0.00431169
00000014_2.tif	CX7389	Control	12.654	10.006	5.8491	2.80342	-3.04568	0	0.29777	0.834774	-0.86105
00000014_2.tif	CX7389	Control	13.247	9.995	5.8491	3.07731	-2.77178	0	0.29777	0.916332	-0.783617
00000014_2.tif	CX7389	Control	16.844	10.068	5.8491	5.79516	-0.053935	0	0.29777	1.72563	-0.0152481
00000014_2.tif	CX7389	Control	11.951	10.132	5.8491	2.50724	-3.34186	0	0.29777	0.74658	-0.944785
00000014_2.tif	CX7389	Control	17.091	10.174	5.8491	5.97373	0.124629	1	0.29777	1.7788	0.0352342
00000014_2.tif	CX7389	Control	12.981	10.199	5.8491	2.7671	-3.082	0	0.29777	0.823959	-0.871319
00000014_2.tif	CX7389	Control	17.249	10.293	5.8491	6.07162	0.222524	1	0.29777	1.80795	0.0629103
00000014_2.tif	CX7389	Control	11.54	10.387	5.8491	2.23528	-3.61381	0	0.29777	0.6656	-1.02167
00000014_2.tif	CX7389	Control	11.895	10.464	5.8491	2.17091	-3.67819	0	0.29777	0.646432	-1.03987
00000014_2.tif	CX7389	Control	16.468	10.458	5.8491	5.28906	-0.560036	0	0.29777	1.57492	-0.158329
00000014_2.tif	CX7389	Control	16.532	10.573	5.8491	5.30208	-0.547014	0	0.29777	1.5788	-0.154648
00000014_2.tif	CX7389	Control	5.315	10.684	5.8491	6.61562	0.766518	1	0.29777	1.96993	0.216704
00000014_2.tif	CX7389	Control	12.877	10.741	5.8491	2.24907	-3.60002	0	0.29777	0.669707	-1.01777
00000014_2.tif	CX7389	Control	16.432	10.846	5.8491	5.10889	-0.740208	0	0.29777	1.52127	-0.209266
00000014_2.tif	CX7389	Control	15.383	11.075	5.8491	4.04841	-1.80069	0	0.29777	1.20549	-0.509078
00000014_2.tif	CX7389	Control	5.543	11.125	5.8491	6.27858	0.429487	1	0.29777	1.86957	0.121421
00000014_2.tif	CX7389	Control	5.64	11.157	5.8491	6.17676	0.327663	1	0.29777	1.83925	0.0926342
00000014_2.tif	CX7389	Control	4.117	11.534	5.8491	7.60197	1.75287	1	0.29777	2.26364	0.495559
00000014_2.tif	CX7389	Control	11.278	11.608	5.8491	1.07513	-4.77396	0	0.29777	0.320143	-1.34966
00000014_2.tif	CX7389	Control	11.375	11.673	5.8491	0.983649	-4.86545	0	0.29777	0.292901	-1.37552
00000014_2.tif	CX7389	Control	8.255	11.673	5.8491	3.51594	-2.33316	0	0.29777	1.04694	-0.659613
00000014_2.tif	CX7389	Control	13.698	11.826	5.8491	2.20492	-3.64418	0	0.29777	0.65656	-1.03025
00000014_2.tif	CX7389	Control	13.639	11.934	5.8491	2.11249	-3.73661	0	0.29777	0.629035	-1.05639
00000014_2.tif	CX7389	Control	6.792	11.984	5.8491	4.89053	-0.958567	0	0.29777	1.45625	-0.270998
00000014_2.tif	CX7389	Control	16.068	12.073	5.8491	4.46067	-1.38843	0	0.29777	1.32825	-0.392527
00000014_2.tif	CX7389	Control	16.162	12.133	5.8491	4.54715	-1.30194	0	0.29777	1.35401	-0.368075
00000014_2.tif	CX7389	Control	7.601	12.121	5.8491	4.0707	-1.7784	0	0.29777	1.21213	-0.502775
00000014_2.tif	CX7389	Control	6.879	12.152	5.8491	4.78494	-1.06416	0	0.29777	1.42481	-0.30085
00000014_2.tif	CX7389	Control	13.026	12.189	5.8491	1.45051	-4.39859	0	0.29777	0.431919	-1.24353
00000014_2.tif	CX7389	Control	7.516	12.201	5.8491	4.14623	-1.70287	0	0.29777	1.23462	-0.481423
00000014_2.tif	CX7389	Control	12.318	12.251	5.8491	0.771032	-5.07807	0	0.29777	0.22959	-1.43563
00000014_2.tif	CX7389	Control	15.639	12.318	5.8491	4.00939	-1.83971	0	0.29777	1.19388	-0.520108
00000014_2.tif	CX7389	Control	9.371	12.398	5.8491	2.28083	-3.56827	0	0.29777	0.679163	-1.00879
00000014_2.tif	CX7389	Control	4.893	12.389	5.8491	6.75195	0.902855	1	0.29777	2.01053	0.255248
00000014_2.tif	CX7389	Control	12.89	12.451	5.8491	1.26038	-4.58872	0	0.29777	0.375304	-1.29729
00000014_2.tif	CX7389	Control	12.649	12.555	5.8491	1.01009	-4.839	0	0.29777	0.300776	-1.36805
00000014_2.tif	CX7389	Control	9.277	12.581	5.8491	2.36432	-3.48478	0	0.29777	0.704024	-0.985189
00000014_2.tif	CX7389	Control	13.885	12.626	5.8491	2.24401	-3.60509	0	0.29777	0.668198	-1.0192
00000014_2.tif	CX7389	Control	12.645	12.66	5.8491	1.0048	-4.8443	0	0.29777	0.299198	-1.36954
00000014_2.tif	CX7389	Control	13.939	12.723	5.8491	2.30031	-3.54879	0	0.29777	0.684962	-1.00329
00000014_2.tif	CX7389	Control	10.65	12.737	5.8491	0.997883	-4.85122	0	0.29777	0.29714	-1.3715
00000014_2.tif	CX7389	Control	10.734	12.745	5.8491	0.915573	-4.93352	0	0.29777	0.27263	-1.39477
00000014_2.tif	CX7389	Control	10.603	12.823	5.8491	1.05766	-4.79143	0	0.29777	0.314941	-1.3546
00000014_2.tif	CX7389	Control	12.598	12.838	5.8491	0.981516	-4.86758	0	0.29777	0.292266	-1.37613
00000014_2.tif	CX7389	Control	12.402	12.885	5.8491	0.80582	-5.04328	0	0.29777	0.239949	-1.4258
00000014_2.tif	CX7389	Control	10.549	12.876	5.8491	1.12161	-4.72749	0	0.29777	0.333981	-1.33652
00000014_2.tif	CX7389	Control	16.104	13.032	5.8491	4.48198	-1.36712	0	0.29777	1.3346	-0.386502
00000014_2.tif	CX7389	Control	16.06	13.157	5.8491	4.45151	-1.39759	0	0.29777	1.32553	-0.395116
00000014_2.tif	CX7389	Control	9.785	13.155	5.8491	1.93157	-3.91753	0	0.29777	0.575163	-1.10753
00000014_2.tif	CX7389	Control	7.743	13.167	5.8491	3.93619	-1.91291	0	0.29777	1.17208	-0.540802
00000014_2.tif	CX7389	Control	6.633	13.227	5.8491	5.04465	-0.804446	0	0.29777	1.50215	-0.227427
00000014_2.tif	CX7389	Control	4.781	13.321	5.8491	6.89572	1.04663	1	0.29777	2.05334	0.295894
00000014_2.tif	CX7389	Control	6.559	13.376	5.8491	5.13792	-0.711174	0	0.29777	1.52992	-0.201058
00000014_2.tif	CX7389	Control	9.835	13.346	5.8491	1.94646	-3.90264	0	0.29777	0.579598	-1.10332
00000014_2.tif	CX7389	Control	4.893	13.454	5.8491	6.79934	0.950245	1	0.29777	2.02464	0.268646
00000014_2.tif	CX7389	Control	7.144	14.057	5.8491	4.72101	-1.12808	0	0.29777	1.40578	-0.318923
00000014_2.tif	CX7389	Control	7.303	14.144	5.8491	4.59791	-1.25118	0	0.29777	1.36912	-0.353725
00000014_2.tif	CX7389	Control	14.381	14.183	5.8491	3.15445	-2.69465	0	0.29777	0.939301	-0.761809
00000014_2.tif	CX7389	Control	11.118	14.381	5.8491	1.83702	-4.01208	0	0.29777	0.54701	-1.13426
00000014_2.tif	CX7389	Control	10.983	14.442	5.8491	1.93718	-3.91192	0	0.29777	0.576833	-1.10595
00000014_2.tif	CX7389	Control	9.789	14.453	5.8491	2.60572	-3.24337	0	0.29777	0.775906	-0.916942
00000014_2.tif	CX7389	Control	9.875	14.457	5.8491	2.5482	-3.3009	0	0.29777	0.758778	-0.933204
00000014_2.tif	CX7389	Control	9.711	14.566	5.8491	2.74077	-3.10833	0	0.29777	0.816119	-0.878763
00000014_2.tif	CX7389	Control	11.162	14.745	5.8491	2.17832	-3.67078	0	0.29777	0.648638	-1.03777
00000014_2.tif	CX7389	Control	6.352	14.859	5.8491	5.7434	-0.105698	0	0.29777	1.71021	-0.0298821
00000014_2.tif	CX7389	Control	6.557	14.92	5.8491	5.58006	-0.269039	0	0.29777	1.66157	-0.0760607
00000014_2.tif	CX7389	Control	6.468	15.017	5.8491	5.70136	-0.147735	0	0.29777	1.69769	-0.0417665
00000014_2.tif	CX7389	Control	15.03	15.236	5.8491	4.28121	-1.56789	0	0.29777	1.27482	-0.443261
00000014_2.tif	CX7389	Control	11.542	15.652	5.8491	3.03362	-2.81548	0	0.29777	0.90332	-0.795971
00000014_2.tif	CX7389	Control	14.52	15.795	5.8491	4.28594	-1.56316	0	0.29777	1.27622	-0.441924
00000014_2.tif	CX7389	Control	11.578	15.845	5.8491	3.22562	-2.62348	0	0.29777	0.960491	-0.741691
00000014_2.tif	CX7389	Control	10.265	16.03	5.8491	3.67716	-2.17194	0	0.29777	1.09495	-0.614035
00000014_2.tif	CX7389	Control	14.428	15.975	5.8491	4.36158	-1.48752	0	0.29777	1.29875	-0.420539
00000014_2.tif	CX7389	Control	16.688	16.143	5.8491	6.15498	0.305879	1	0.29777	1.83277	0.0864757
00000014_2.tif	CX7389	Control	16.601	16.347	5.8491	6.2042	0.355105	1	0.29777	1.84743	0.100392
00000014_2.tif	CX7389	Control	9.427	16.613	5.8491	4.56573	-1.28337	0	0.29777	1.35954	-0.362825
00000014_2.tif	CX7389	Control	8.169	16.834	5.8491	5.46009	-0.389008	0	0.29777	1.62585	-0.109977
00000014_2.tif	CX7389	Control	10.996	16.921	5.8491	4.34909	-1.5	0	0.29777	1.29503	-0.424069
00000014_2.tif	CX7389	Control	7.977	16.948	5.8491	5.67067	-0.17843	0	0.29777	1.68855	-0.0504442
00000014_2.tif	CX7389	Control	7.751	17.31	5.8491	6.09329	0.244193	1	0.29777	1.8144	0.0690365
00000014_2.tif	CX7389	Control	14.112	17.857	5.8491	5.79068	-0.0584149	0	0.29777	1.72429	-0.0165146
00000014_2.tif	CX7389	Control	14.259	17.879	5.8491	5.87461	0.0255089	1	0.29777	1.74928	0.00721167
00000014_2.tif	CX7389	Control	15.021	18.389	5.8491	6.68624	0.837139	1	0.29777	1.99096	0.236669
00000014_2.tif	CX7389	Control	9.991	18.792	5.8491	6.38875	0.539649	1	0.29777	1.90238	0.152565
00000014_2.tif	CX7389	Control	10.098	18.869	5.8491	6.43668	0.587582	1	0.29777	1.91665	0.166117
00000007_2.tif	CX7389	Control	9.259	3.171	4.65102	9.6483	4.99727	1	0.29777	2.87297	1.4742
00000007_2.tif	CX7389	Control	16.341	3.725	4.65102	7.63635	2.98533	1	0.29777	2.27388	0.880673
00000007_2.tif	CX7389	Control	16.425	3.829	4.65102	7.55425	2.90323	1	0.29777	2.24943	0.856452
00000007_2.tif	CX7389	Control	16.481	3.831	4.65102	7.56566	2.91463	1	0.29777	2.25283	0.859817
00000007_2.tif	CX7389	Control	18.37	4.398	4.65102	7.72774	3.07672	1	0.29777	2.30109	0.907633
00000007_2.tif	CX7389	Control	18.127	4.418	4.65102	7.59599	2.94497	1	0.29777	2.26186	0.868766
00000007_2.tif	CX7389	Control	15.447	4.594	4.65102	6.62599	1.97496	1	0.29777	1.97302	0.582614
00000007_2.tif	CX7389	Control	15.215	4.676	4.65102	6.52044	1.86941	1	0.29777	1.94159	0.551477
00000007_2.tif	CX7389	Control	15.279	4.871	4.65102	6.33222	1.68119	1	0.29777	1.88554	0.495952
00000007_2.tif	CX7389	Control	10.55	4.975	4.65102	7.43108	2.78006	1	0.29777	2.21275	0.820118
00000007_2.tif	CX7389	Control	16.443	5.024	4.65102	6.40384	1.75282	1	0.29777	1.90687	0.517081
00000007_2.tif	CX7389	Control	10.768	5.092	4.65102	7.21416	2.56314	1	0.29777	2.14816	0.756125
00000007_2.tif	CX7389	Control	16.389	5.111	4.65102	6.30526	1.65424	1	0.29777	1.87752	0.488001
00000007_2.tif	CX7389	Control	16.154	5.199	4.65102	6.1592	1.50818	1	0.29777	1.83402	0.444912
00000007_2.tif	CX7389	Control	16.486	5.205	4.65102	6.24278	1.59176	1	0.29777	1.85891	0.469568
00000007_2.tif	CX7389	Control	16.304	5.212	4.65102	6.18498	1.53396	1	0.29777	1.8417	0.452518
00000007_2.tif	CX7389	Control	10.629	5.717	4.65102	6.77743	2.1264	1	0.29777	2.01811	0.627289
00000007_2.tif	CX7389	Control	10.526	5.714	4.65102	6.84145	2.19042	1	0.29777	2.03718	0.646175
00000007_2.tif	CX7389	Control	10.552	5.815	4.65102	6.74531	2.09429	1	0.29777	2.00855	0.617815
00000007_2.tif	CX7389	Control	13.802	5.949	4.65102	5.29155	0.640529	1	0.29777	1.57567	0.188956
00000007_2.tif	CX7389	Control	14.626	5.99	4.65102	5.18206	0.531037	1	0.29777	1.54306	0.156656
00000007_2.tif	CX7389	Control	10.394	6.989	4.65102	5.96821	1.31719	1	0.29777	1.77715	0.38857
00000007_2.tif	CX7389	Control	8.672	7.009	4.65102	7.28553	2.63451	1	0.29777	2.16941	0.777181
00000007_2.tif	CX7389	Control	10.358	7.076	4.65102	5.93355	1.28253	1	0.29777	1.76683	0.378346
00000007_2.tif	CX7389	Control	10.357	7.265	4.65102	5.80544	1.15441	1	0.29777	1.72868	0.340552
00000007_2.tif	CX7389	Control	13.567	7.283	4.65102	4.03725	-0.613775	0	0.29777	1.20217	-0.181064
00000007_2.tif	CX7389	Control	12.173	7.385	4.65102	4.52569	-0.125336	0	0.29777	1.34761	-0.036974
00000007_2.tif	CX7389	Control	8.423	7.827	4.65102	7.06944	2.41842	1	0.29777	2.10507	0.713433
00000007_2.tif	CX7389	Control	19.073	7.818	4.65102	5.55008	0.899057	1	0.29777	1.65265	0.265222
00000007_2.tif	CX7389	Control	8.226	7.916	4.65102	7.20293	2.5519	1	0.29777	2.14482	0.752812
00000007_2.tif	CX7389	Control	13.85	8.009	4.65102	3.26285	-1.38818	0	0.29777	0.971578	-0.409512
00000007_2.tif	CX7389	Control	12.343	8.111	4.65102	3.83361	-0.817411	0	0.29777	1.14153	-0.241136
00000007_2.tif	CX7389	Control	14.179	8.155	4.65102	3.0537	-1.59733	0	0.29777	0.9093	-0.471211
00000007_2.tif	CX7389	Control	18.408	8.178	4.65102	4.80407	0.153046	1	0.29777	1.43051	0.0451485
00000007_2.tif	CX7389	Control	14.543	8.242	4.65102	2.93199	-1.71903	0	0.29777	0.873059	-0.507115
00000007_2.tif	CX7389	Control	14.419	8.353	4.65102	2.82853	-1.82249	0	0.29777	0.842252	-0.537635
00000007_2.tif	CX7389	Control	18.02	8.544	4.65102	4.27277	-0.378256	0	0.29777	1.2723	-0.111585
00000007_2.tif	CX7389	Control	16.8	8.658	4.65102	3.30732	-1.3437	0	0.29777	0.984822	-0.396391
00000007_2.tif	CX7389	Control	18.174	8.675	4.65102	4.31816	-0.33286	0	0.29777	1.28582	-0.0981937
00000007_2.tif	CX7389	Control	14.277	8.669	4.65102	2.53079	-2.12024	0	0.29777	0.753593	-0.62547
00000007_2.tif	CX7389	Control	18.155	8.799	4.65102	4.23192	-0.419104	0	0.29777	1.26014	-0.123636
00000007_2.tif	CX7389	Control	14.422	8.97	4.65102	2.21388	-2.43715	0	0.29777	0.659226	-0.718959
00000007_2.tif	CX7389	Control	14.945	8.996	4.65102	2.19577	-2.45525	0	0.29777	0.653835	-0.724299
00000007_2.tif	CX7389	Control	14.927	9.124	4.65102	2.06651	-2.58451	0	0.29777	0.615346	-0.76243
00000007_2.tif	CX7389	Control	14.145	9.198	4.65102	2.03782	-2.6132	0	0.29777	0.606802	-0.770895
00000007_2.tif	CX7389	Control	16.522	9.277	4.65102	2.66302	-1.98801	0	0.29777	0.792967	-0.586462
00000007_2.tif	CX7389	Control	14.448	9.247	4.65102	1.93567	-2.71535	0	0.29777	0.576386	-0.801028
00000007_2.tif	CX7389	Control	11.709	9.497	4.65102	3.38541	-1.26562	0	0.29777	1.00807	-0.373357
00000007_2.tif	CX7389	Control	12.823	9.619	4.65102	2.39862	-2.2524	0	0.29777	0.714238	-0.664458
00000007_2.tif	CX7389	Control	11.852	9.672	4.65102	3.17559	-1.47543	0	0.29777	0.945597	-0.435252
00000007_2.tif	CX7389	Control	18.568	9.7	4.65102	4.18446	-0.466568	0	0.29777	1.24601	-0.137637
00000007_2.tif	CX7389	Control	18.435	9.724	4.65102	4.05159	-0.599436	0	0.29777	1.20644	-0.176834
00000007_2.tif	CX7389	Control	12.18	9.802	4.65102	2.82537	-1.82565	0	0.29777	0.841312	-0.538567
00000007_2.tif	CX7389	Control	16.747	9.87	4.65102	2.46747	-2.18355	0	0.29777	0.734739	-0.644148
00000007_2.tif	CX7389	Control	8.524	9.825	4.65102	6.27332	1.6223	1	0.29777	1.86801	0.478577
00000007_2.tif	CX7389	Control	8.261	9.85	4.65102	6.52532	1.87429	1	0.29777	1.94304	0.552917
00000007_2.tif	CX7389	Control	11.78	9.966	4.65102	3.11401	-1.53701	0	0.29777	0.92726	-0.453418
00000007_2.tif	CX7389	Control	12.711	10.04	4.65102	2.24611	-2.40491	0	0.29777	0.668825	-0.709449
00000007_2.tif	CX7389	Control	11.637	10.079	4.65102	3.20606	-1.44496	0	0.29777	0.95467	-0.426263
00000007_2.tif	CX7389	Control	12.641	10.106	4.65102	2.27518	-2.37584	0	0.29777	0.677481	-0.700873
00000007_2.tif	CX7389	Control	12.859	10.124	4.65102	2.07595	-2.57507	0	0.29777	0.618156	-0.759647
00000007_2.tif	CX7389	Control	17.036	10.179	4.65102	2.58346	-2.06756	0	0.29777	0.769277	-0.609931
00000007_2.tif	CX7389	Control	16.416	10.249	4.65102	1.99177	-2.65925	0	0.29777	0.59309	-0.784479
00000007_2.tif	CX7389	Control	17.146	10.309	4.65102	2.64004	-2.01099	0	0.29777	0.786124	-0.593241
00000007_2.tif	CX7389	Control	9.456	10.501	4.65102	5.23815	0.587131	1	0.29777	1.55977	0.173204
00000007_2.tif	CX7389	Control	10.804	10.672	4.65102	3.87936	-0.771667	0	0.29777	1.15516	-0.227642
00000007_2.tif	CX7389	Control	16.168	10.738	4.65102	1.57786	-3.07316	0	0.29777	0.46984	-0.906583
00000007_2.tif	CX7389	Control	11.072	11.013	4.65102	3.58253	-1.06849	0	0.29777	1.06677	-0.315206
00000007_2.tif	CX7389	Control	13.568	11.062	4.65102	1.08857	-3.56245	0	0.29777	0.324144	-1.05092
00000007_2.tif	CX7389	Control	14.621	11.158	4.65102	0.0331059	-4.61792	0	0.29777	0.00985794	-1.36229
00000007_2.tif	CX7389	Control	10.126	11.183	4.65102	4.52501	-0.12601	0	0.29777	1.34741	-0.037173
00000007_2.tif	CX7389	Control	17.439	11.196	4.65102	2.7881	-1.86292	0	0.29777	0.830214	-0.549562
00000007_2.tif	CX7389	Control	13.615	11.192	4.65102	1.03619	-3.61483	0	0.29777	0.308547	-1.06638
00000007_2.tif	CX7389	Control	3.28	11.242	4.65102	11.3712	6.72019	1	0.29777	3.38601	1.98246
00000007_2.tif	CX7389	Control	12.323	11.341	4.65102	2.33413	-2.3169	0	0.29777	0.695033	-0.683485
00000007_2.tif	CX7389	Control	17.134	11.381	4.65102	2.49178	-2.15924	0	0.29777	0.741977	-0.636977
00000007_2.tif	CX7389	Control	14.845	11.521	4.65102	0.399296	-4.25173	0	0.29777	0.118898	-1.25426
00000007_2.tif	CX7389	Control	13.557	11.547	4.65102	1.15649	-3.49454	0	0.29777	0.344367	-1.03089
00000007_2.tif	CX7389	Control	8.611	11.553	4.65102	6.052	1.40098	1	0.29777	1.80211	0.413289
00000007_2.tif	CX7389	Control	15.045	11.594	4.65102	0.577339	-4.07368	0	0.29777	0.171914	-1.20174
00000007_2.tif	CX7389	Control	12.437	11.612	4.65102	2.2573	-2.39373	0	0.29777	0.672156	-0.706149
00000007_2.tif	CX7389	Control	8.632	11.709	4.65102	6.04291	1.39188	1	0.29777	1.7994	0.410606
00000007_2.tif	CX7389	Control	10.247	11.752	4.65102	4.44203	-0.208995	0	0.29777	1.3227	-0.0616536
00000007_2.tif	CX7389	Control	18.181	11.758	4.65102	3.57831	-1.07271	0	0.29777	1.06551	-0.316451
00000007_2.tif	CX7389	Control	8.682	11.755	4.65102	5.9974	1.34638	1	0.29777	1.78585	0.397182
00000007_2.tif	CX7389	Control	17.948	11.83	4.65102	3.36202	-1.289	0	0.29777	1.00111	-0.380256
00000007_2.tif	CX7389	Control	7.791	11.891	4.65102	6.89758	2.24655	1	0.29777	2.05389	0.662733
00000007_2.tif	CX7389	Control	12.227	11.892	4.65102	2.52867	-2.12235	0	0.29777	0.752962	-0.626094
00000007_2.tif	CX7389	Control	11.94	11.931	4.65102	2.81524	-1.83578	0	0.29777	0.838295	-0.541555
00000007_2.tif	CX7389	Control	15.722	11.99	4.65102	1.34765	-3.30337	0	0.29777	0.40129	-0.974495
00000007_2.tif	CX7389	Control	11.83	12.056	4.65102	2.95626	-1.69476	0	0.29777	0.880287	-0.499954
00000007_2.tif	CX7389	Control	17.838	12.075	4.65102	3.31246	-1.33857	0	0.29777	0.986351	-0.394877
00000007_2.tif	CX7389	Control	7.709	12.054	4.65102	6.99781	2.34678	1	0.29777	2.08374	0.692301
00000007_2.tif	CX7389	Control	14.468	12.179	4.65102	1.02349	-3.62753	0	0.29777	0.304766	-1.07012
00000007_2.tif	CX7389	Control	11.577	12.179	4.65102	3.23474	-1.41629	0	0.29777	0.963208	-0.417805
00000007_2.tif	CX7389	Control	9.349	12.231	4.65102	5.40673	0.755702	1	0.29777	1.60996	0.222932
00000007_2.tif	CX7389	Control	14.894	12.305	4.65102	1.15877	-3.49226	0	0.29777	0.345046	-1.03022
00000007_2.tif	CX7389	Control	17.68	12.313	4.65102	3.23678	-1.41425	0	0.29777	0.963815	-0.417203
00000007_2.tif	CX7389	Control	15.462	12.375	4.65102	1.45084	-3.20019	0	0.29777	0.432016	-0.944055
00000007_2.tif	CX7389	Control	18.004	12.338	4.65102	3.54995	-1.10107	0	0.29777	1.05707	-0.324816
00000007_2.tif	CX7389	Control	9.494	12.414	4.65102	5.30445	0.653428	1	0.29777	1.57951	0.192761
00000007_2.tif	CX7389	Control	11.667	12.449	4.65102	3.24576	-1.40526	0	0.29777	0.966491	-0.414552
00000007_2.tif	CX7389	Control	17.876	12.491	4.65102	3.48431	-1.16672	0	0.29777	1.03752	-0.344182
00000007_2.tif	CX7389	Control	5.91	12.655	4.65102	8.86591	4.21489	1	0.29777	2.64	1.24339
00000007_2.tif	CX7389	Control	10.968	12.61	4.65102	3.95377	-0.697249	0	0.29777	1.17732	-0.205689
00000007_2.tif	CX7389	Control	8.07	12.651	4.65102	6.74515	2.09412	1	0.29777	2.0085	0.617766
00000007_2.tif	CX7389	Control	11.59	12.672	4.65102	3.40877	-1.24225	0	0.29777	1.01503	-0.366464
00000007_2.tif	CX7389	Control	6.196	12.736	4.65102	8.59844	3.94741	1	0.29777	2.56036	1.16449
00000007_2.tif	CX7389	Control	12.031	12.684	4.65102	3.02499	-1.62604	0	0.29777	0.90075	-0.479681
00000007_2.tif	CX7389	Control	18.113	12.865	4.65102	3.85379	-0.797234	0	0.29777	1.14754	-0.235184
00000007_2.tif	CX7389	Control	11.63	12.913	4.65102	3.48676	-1.16426	0	0.29777	1.03825	-0.343457
00000007_2.tif	CX7389	Control	8.531	12.873	4.65102	6.35199	1.70097	1	0.29777	1.89143	0.501786
00000007_2.tif	CX7389	Control	8.594	12.949	4.65102	6.31229	1.66126	1	0.29777	1.87961	0.490073
00000007_2.tif	CX7389	Control	16.236	12.953	4.65102	2.38415	-2.26687	0	0.29777	0.709929	-0.668727
00000007_2.tif	CX7389	Control	16.372	13	4.65102	2.51066	-2.14036	0	0.29777	0.7476	-0.631407
00000007_2.tif	CX7389	Control	16.233	13.169	4.65102	2.54769	-2.10333	0	0.29777	0.758626	-0.620483
00000007_2.tif	CX7389	Control	18.019	13.194	4.65102	3.92835	-0.722677	0	0.29777	1.16974	-0.21319
00000007_2.tif	CX7389	Control	17.036	13.227	4.65102	3.14821	-1.50281	0	0.29777	0.937444	-0.443329
00000007_2.tif	CX7389	Control	16.411	13.252	4.65102	2.7247	-1.92632	0	0.29777	0.811334	-0.568265
00000007_2.tif	CX7389	Control	12.931	13.305	4.65102	2.74009	-1.91093	0	0.29777	0.815916	-0.563726
00000007_2.tif	CX7389	Control	15.91	13.3	4.65102	2.47254	-2.17848	0	0.29777	0.736249	-0.642652
00000007_2.tif	CX7389	Control	8.447	13.329	4.65102	6.56828	1.91725	1	0.29777	1.95584	0.56559
00000007_2.tif	CX7389	Control	12.758	13.333	4.65102	2.87287	-1.77816	0	0.29777	0.855454	-0.524556
00000007_2.tif	CX7389	Control	13.575	13.354	4.65102	2.43288	-2.21814	0	0.29777	0.724438	-0.654353
00000007_2.tif	CX7389	Control	9.53	13.498	4.65102	5.62449	0.973469	1	0.29777	1.67481	0.287173
00000007_2.tif	CX7389	Control	9.409	13.518	4.65102	5.74302	1.092	1	0.29777	1.7101	0.322139
00000007_2.tif	CX7389	Control	10.649	13.549	4.65102	4.65469	0.00366564	1	0.29777	1.38603	0.00108136
00000007_2.tif	CX7389	Control	16.583	13.599	4.65102	3.10209	-1.54894	0	0.29777	0.923709	-0.456936
00000007_2.tif	CX7389	Control	15.406	13.712	4.65102	2.64983	-2.00119	0	0.29777	0.789041	-0.590351
00000007_2.tif	CX7389	Control	9.228	13.758	4.65102	6.00802	1.357	1	0.29777	1.78901	0.400314
00000007_2.tif	CX7389	Control	10.584	14.069	4.65102	4.99331	0.342282	1	0.29777	1.48686	0.100973
00000007_2.tif	CX7389	Control	10.535	14.102	4.65102	5.05236	0.401338	1	0.29777	1.50444	0.118395
00000007_2.tif	CX7389	Control	9.092	14.294	4.65102	6.37569	1.72466	1	0.29777	1.89849	0.508775
00000007_2.tif	CX7389	Control	11.813	14.362	4.65102	4.2697	-0.381323	0	0.29777	1.27139	-0.11249
00000007_2.tif	CX7389	Control	9.661	14.543	4.65102	6.02194	1.37091	1	0.29777	1.79315	0.40442
00000007_2.tif	CX7389	Control	9.899	14.57	4.65102	5.84191	1.19089	1	0.29777	1.73955	0.351311
00000007_2.tif	CX7389	Control	10.965	14.73	4.65102	5.12308	0.472057	1	0.29777	1.5255	0.139257
00000007_2.tif	CX7389	Control	10.059	14.793	4.65102	5.84791	1.19689	1	0.29777	1.74133	0.353083
00000007_2.tif	CX7389	Control	10.727	14.814	4.65102	5.35368	0.702661	1	0.29777	1.59417	0.207285
00000007_2.tif	CX7389	Control	10.728	14.872	4.65102	5.39258	0.741557	1	0.29777	1.60575	0.218759
00000007_2.tif	CX7389	Control	10.871	14.871	4.65102	5.28876	0.637738	1	0.29777	1.57483	0.188133
00000007_2.tif	CX7389	Control	18.264	15.139	4.65102	5.36571	0.714688	1	0.29777	1.59775	0.210833
00000007_2.tif	CX7389	Control	11.823	15.188	4.65102	4.91181	0.260782	1	0.29777	1.46259	0.0769308
00000007_2.tif	CX7389	Control	17.961	15.206	4.65102	5.21817	0.567142	1	0.29777	1.55381	0.167307
00000007_2.tif	CX7389	Control	17.781	15.256	4.65102	5.14548	0.494455	1	0.29777	1.53217	0.145864
00000007_2.tif	CX7389	Control	11.751	15.303	4.65102	5.04729	0.396269	1	0.29777	1.50293	0.116899
00000007_2.tif	CX7389	Control	12.554	15.454	4.65102	4.76791	0.116883	1	0.29777	1.41974	0.0344804
00000007_2.tif	CX7389	Control	12.418	15.442	4.65102	4.81863	0.167606	1	0.29777	1.43484	0.0494437
00000007_2.tif	CX7389	Control	12.187	15.51	4.65102	4.98894	0.337918	1	0.29777	1.48556	0.0996858
00000007_2.tif	CX7389	Control	16.651	16.498	4.65102	5.68914	1.03811	1	0.29777	1.69405	0.306243
00000007_2.tif	CX7389	Control	16.643	16.689	4.65102	5.86561	1.21458	1	0.29777	1.7466	0.358302
00000007_2.tif	CX7389	Control	11.127	16.77	4.65102	6.61485	1.96382	1	0.29777	1.9697	0.579327
00000007_2.tif	CX7389	Control	11.159	16.86	4.65102	6.67438	2.02336	1	0.29777	1.98743	0.596891
00000011_1.tif	CX7389	Control	12.635	2.683	4.72931	9.00552	4.27621	1	0.29777	2.68157	1.26148
00000011_1.tif	CX7389	Control	13.079	2.751	4.72931	8.77615	4.04684	1	0.29777	2.61327	1.19382
00000011_1.tif	CX7389	Control	13.276	3.615	4.72931	7.89933	3.17002	1	0.29777	2.35218	0.935156
00000011_1.tif	CX7389	Control	13.145	3.646	4.72931	7.91992	3.19061	1	0.29777	2.35832	0.941231
00000011_1.tif	CX7389	Control	15.703	3.698	4.72931	7.27618	2.54687	1	0.29777	2.16663	0.751328
00000011_1.tif	CX7389	Control	13.13	3.711	4.72931	7.86577	3.13646	1	0.29777	2.34219	0.925257
00000011_1.tif	CX7389	Control	15.649	3.838	4.72931	7.14037	2.41106	1	0.29777	2.12619	0.711264
00000011_1.tif	CX7389	Control	13.457	3.91	4.72931	7.55862	2.82931	1	0.29777	2.25073	0.834645
00000011_1.tif	CX7389	Control	13.453	4.046	4.72931	7.43344	2.70413	1	0.29777	2.21345	0.797717
00000011_1.tif	CX7389	Control	16.702	4.552	4.72931	6.42659	1.69728	1	0.29777	1.91365	0.500697
00000011_1.tif	CX7389	Control	16.738	4.73	4.72931	6.25224	1.52293	1	0.29777	1.86173	0.449264
00000011_1.tif	CX7389	Control	15.939	4.894	4.72931	6.06911	1.3398	1	0.29777	1.8072	0.395241
00000011_1.tif	CX7389	Control	16.024	5.031	4.72931	5.92927	1.19996	1	0.29777	1.76556	0.353988
00000011_1.tif	CX7389	Control	13.519	5.049	4.72931	6.48381	1.7545	1	0.29777	1.93069	0.517579
00000011_1.tif	CX7389	Control	16.022	5.155	4.72931	5.80537	1.07606	1	0.29777	1.72867	0.317439
00000011_1.tif	CX7389	Control	16.07	5.158	4.72931	5.8012	1.07189	1	0.29777	1.72742	0.316208
00000011_1.tif	CX7389	Control	16.885	5.185	4.72931	5.81492	1.08561	1	0.29777	1.73151	0.320256
00000011_1.tif	CX7389	Control	17.068	5.363	4.72931	5.66378	0.934473	1	0.29777	1.6865	0.27567
00000011_1.tif	CX7389	Control	15.766	5.498	4.72931	5.47628	0.746975	1	0.29777	1.63067	0.220358
00000011_1.tif	CX7389	Control	14.939	5.501	4.72931	5.59811	0.868802	1	0.29777	1.66695	0.256297
00000011_1.tif	CX7389	Control	20.567	5.482	4.72931	7.01158	2.28227	1	0.29777	2.08784	0.673269
00000011_1.tif	CX7389	Control	20.134	5.523	4.72931	6.71641	1.9871	1	0.29777	1.99994	0.586194
00000011_1.tif	CX7389	Control	20.195	5.549	4.72931	6.73152	2.00221	1	0.29777	2.00444	0.590652
00000011_1.tif	CX7389	Control	20.129	5.598	4.72931	6.6529	1.92359	1	0.29777	1.98103	0.567459
00000011_1.tif	CX7389	Control	19.737	5.876	4.72931	6.19856	1.46925	1	0.29777	1.84574	0.433429
00000011_1.tif	CX7389	Control	19.838	5.886	4.72931	6.24881	1.51951	1	0.29777	1.86071	0.448254
00000011_1.tif	CX7389	Control	19.611	5.971	4.72931	6.04873	1.31942	1	0.29777	1.80113	0.389228
00000011_1.tif	CX7389	Control	18.286	6.194	4.72931	5.20551	0.476198	1	0.29777	1.55004	0.140478
00000011_1.tif	CX7389	Control	18.151	6.247	4.72931	5.10362	0.374307	1	0.29777	1.5197	0.11042
00000011_1.tif	CX7389	Control	13.257	6.468	4.72931	5.36198	0.632674	1	0.29777	1.59664	0.186639
00000011_1.tif	CX7389	Control	21.859	6.568	4.72931	7.17163	2.44233	1	0.29777	2.1355	0.720486
00000011_1.tif	CX7389	Control	17.36	6.691	4.72931	4.42503	-0.304281	0	0.29777	1.31764	-0.0897629
00000011_1.tif	CX7389	Control	12.702	6.917	4.72931	5.33684	0.607533	1	0.29777	1.58915	0.179222
00000011_1.tif	CX7389	Control	17.665	6.948	4.72931	4.27336	-0.455946	0	0.29777	1.27248	-0.134504
00000011_1.tif	CX7389	Control	17.614	7.039	4.72931	4.17038	-0.558933	0	0.29777	1.24181	-0.164885
00000011_1.tif	CX7389	Control	18.236	7.085	4.72931	4.38115	-0.348164	0	0.29777	1.30457	-0.102708
00000011_1.tif	CX7389	Control	12.79	7.152	4.72931	5.10216	0.372851	1	0.29777	1.51927	0.109991
00000011_1.tif	CX7389	Control	17.642	7.308	4.72931	3.92895	-0.800363	0	0.29777	1.16992	-0.236107
00000011_1.tif	CX7389	Control	13.442	7.35	4.72931	4.53411	-0.195196	0	0.29777	1.35012	-0.0575828
00000011_1.tif	CX7389	Control	17.634	7.47	4.72931	3.77585	-0.953457	0	0.29777	1.12434	-0.28127
00000011_1.tif	CX7389	Control	11.301	7.53	4.72931	5.96942	1.24011	1	0.29777	1.77751	0.365832
00000011_1.tif	CX7389	Control	14.004	7.616	4.72931	3.99235	-0.736964	0	0.29777	1.1888	-0.217404
00000011_1.tif	CX7389	Control	20.709	7.859	4.72931	5.48117	0.751863	1	0.29777	1.63213	0.2218
00000011_1.tif	CX7389	Control	18.286	8.236	4.72931	3.4367	-1.29261	0	0.29777	1.02335	-0.38132
00000011_1.tif	CX7389	Control	21.461	8.307	4.72931	5.90189	1.17258	1	0.29777	1.75741	0.345912
00000011_1.tif	CX7389	Control	18.271	8.324	4.72931	3.3581	-1.37121	0	0.29777	0.999942	-0.404506
00000011_1.tif	CX7389	Control	21.696	8.358	4.72931	6.09082	1.36151	1	0.29777	1.81366	0.401645
00000011_1.tif	CX7389	Control	18.166	8.381	4.72931	3.2486	-1.48071	0	0.29777	0.967336	-0.436809
00000011_1.tif	CX7389	Control	21.68	8.485	4.72931	6.0231	1.2938	1	0.29777	1.7935	0.38167
00000011_1.tif	CX7389	Control	16.786	8.51	4.72931	2.51998	-2.20933	0	0.29777	0.750375	-0.651752
00000011_1.tif	CX7389	Control	12.362	8.661	4.72931	4.46256	-0.266744	0	0.29777	1.32882	-0.0786895
00000011_1.tif	CX7389	Control	13.966	8.755	4.72931	3.12898	-1.60033	0	0.29777	0.931715	-0.472098
00000011_1.tif	CX7389	Control	17.049	8.745	4.72931	2.37459	-2.35472	0	0.29777	0.707082	-0.694641
00000011_1.tif	CX7389	Control	17.045	8.804	4.72931	2.31822	-2.41108	0	0.29777	0.690298	-0.71127
00000011_1.tif	CX7389	Control	16.882	8.821	4.72931	2.24687	-2.48244	0	0.29777	0.669049	-0.732321
00000011_1.tif	CX7389	Control	19.454	8.855	4.72931	3.8845	-0.844806	0	0.29777	1.15669	-0.249218
00000011_1.tif	CX7389	Control	22.217	8.891	4.72931	6.37349	1.64418	1	0.29777	1.89783	0.485032
00000011_1.tif	CX7389	Control	22.311	8.962	4.72931	6.44012	1.71081	1	0.29777	1.91767	0.504689
00000011_1.tif	CX7389	Control	12.983	9.011	4.72931	3.75004	-0.979264	0	0.29777	1.11665	-0.288883
00000011_1.tif	CX7389	Control	23.986	9.043	4.72931	8.0297	3.30039	1	0.29777	2.391	0.973614
00000011_1.tif	CX7389	Control	10.161	9.067	4.72931	6.31669	1.58738	1	0.29777	1.88092	0.468278
00000011_1.tif	CX7389	Control	19.198	9.048	4.72931	3.56486	-1.16445	0	0.29777	1.06151	-0.343514
00000011_1.tif	CX7389	Control	13.043	9.142	4.72931	3.63165	-1.09766	0	0.29777	1.0814	-0.323809
00000011_1.tif	CX7389	Control	18.975	9.266	4.72931	3.2604	-1.46891	0	0.29777	0.97085	-0.433327
00000011_1.tif	CX7389	Control	19.06	9.29	4.72931	3.32124	-1.40807	0	0.29777	0.988964	-0.415382
00000011_1.tif	CX7389	Control	17.319	9.368	4.72931	1.95122	-2.77809	0	0.29777	0.581015	-0.819536
00000011_1.tif	CX7389	Control	19.994	9.44	4.72931	4.09756	-0.631754	0	0.29777	1.22013	-0.186367
00000011_1.tif	CX7389	Control	14.779	9.542	4.72931	1.99758	-2.73173	0	0.29777	0.59482	-0.805859
00000011_1.tif	CX7389	Control	14.284	9.565	4.72931	2.35917	-2.37014	0	0.29777	0.702489	-0.699192
00000011_1.tif	CX7389	Control	16.444	9.598	4.72931	1.38388	-3.34542	0	0.29777	0.412079	-0.9869
00000011_1.tif	CX7389	Control	16.703	9.644	4.72931	1.41132	-3.31799	0	0.29777	0.420248	-0.978807
00000011_1.tif	CX7389	Control	18.197	9.762	4.72931	2.33805	-2.39125	0	0.29777	0.696202	-0.70542
00000011_1.tif	CX7389	Control	18.508	9.851	4.72931	2.57057	-2.15874	0	0.29777	0.76544	-0.636827
00000011_1.tif	CX7389	Control	19.878	9.908	4.72931	3.83648	-0.892826	0	0.29777	1.14239	-0.263384
00000011_1.tif	CX7389	Control	20.863	9.974	4.72931	4.77743	0.0481257	1	0.29777	1.42258	0.0141971
00000011_1.tif	CX7389	Control	19.401	10.029	4.72931	3.34461	-1.3847	0	0.29777	0.995924	-0.408486
00000011_1.tif	CX7389	Control	20.042	10.065	4.72931	3.9561	-0.773204	0	0.29777	1.17801	-0.228095
00000011_1.tif	CX7389	Control	14.953	10.137	4.72931	1.48299	-3.24632	0	0.29777	0.441591	-0.957663
00000011_1.tif	CX7389	Control	12.863	10.174	4.72931	3.41618	-1.31313	0	0.29777	1.01724	-0.387373
00000011_1.tif	CX7389	Control	19.499	10.313	4.72931	3.37324	-1.35607	0	0.29777	1.00445	-0.40004
00000011_1.tif	CX7389	Control	18.708	10.505	4.72931	2.56039	-2.16892	0	0.29777	0.762408	-0.63983
00000011_1.tif	CX7389	Control	14.385	10.571	4.72931	1.84407	-2.88524	0	0.29777	0.549107	-0.851147
00000011_1.tif	CX7389	Control	21.269	10.603	4.72931	5.09339	0.364078	1	0.29777	1.51666	0.107403
00000011_1.tif	CX7389	Control	19.6	10.694	4.72931	3.4222	-1.30711	0	0.29777	1.01903	-0.385598
00000011_1.tif	CX7389	Control	12.556	10.76	4.72931	3.63739	-1.09192	0	0.29777	1.08311	-0.322115
00000011_1.tif	CX7389	Control	21.262	10.728	4.72931	5.07921	0.349901	1	0.29777	1.51244	0.103221
00000011_1.tif	CX7389	Control	19.299	10.858	4.72931	3.11261	-1.6167	0	0.29777	0.926841	-0.476927
00000011_1.tif	CX7389	Control	19.167	10.889	4.72931	2.9798	-1.74951	0	0.29777	0.887295	-0.516105
00000011_1.tif	CX7389	Control	12.546	10.923	4.72931	3.64217	-1.08714	0	0.29777	1.08453	-0.320707
00000011_1.tif	CX7389	Control	8.864	11.129	4.72931	7.326	2.59669	1	0.29777	2.18146	0.766023
00000011_1.tif	CX7389	Control	16.553	11.248	4.72931	0.466181	-4.26313	0	0.29777	0.138815	-1.25762
00000011_1.tif	CX7389	Control	18.637	11.258	4.72931	2.46731	-2.262	0	0.29777	0.73469	-0.667291
00000011_1.tif	CX7389	Control	17.657	11.34	4.72931	1.51786	-3.21145	0	0.29777	0.451972	-0.947379
00000011_1.tif	CX7389	Control	21.759	11.417	4.72931	5.58988	0.860568	1	0.29777	1.6645	0.253868
00000011_1.tif	CX7389	Control	21.324	11.448	4.72931	5.15932	0.430012	1	0.29777	1.53629	0.126854
00000011_1.tif	CX7389	Control	21.593	11.496	4.72931	5.43171	0.702401	1	0.29777	1.6174	0.207208
00000011_1.tif	CX7389	Control	17.359	11.501	4.72931	1.29077	-3.43854	0	0.29777	0.384353	-1.01437
00000011_1.tif	CX7389	Control	21.511	11.476	4.72931	5.34814	0.618836	1	0.29777	1.59252	0.182557
00000011_1.tif	CX7389	Control	8.665	11.996	4.72931	7.59427	2.86496	1	0.29777	2.26135	0.845164
00000011_1.tif	CX7389	Control	8.725	12.004	4.72931	7.53595	2.80664	1	0.29777	2.24398	0.827958
00000011_1.tif	CX7389	Control	12.989	12.19	4.72931	3.42804	-1.30127	0	0.29777	1.02077	-0.383876
00000011_1.tif	CX7389	Control	12.964	12.292	4.72931	3.48909	-1.24022	0	0.29777	1.03895	-0.365865
00000011_1.tif	CX7389	Control	22.047	12.286	4.72931	6.00762	1.27831	1	0.29777	1.78889	0.377101
00000011_1.tif	CX7389	Control	19.771	12.356	4.72931	3.84608	-0.883234	0	0.29777	1.14525	-0.260554
00000011_1.tif	CX7389	Control	21.981	12.439	4.72931	5.97932	1.25001	1	0.29777	1.78046	0.368752
00000011_1.tif	CX7389	Control	19.542	12.618	4.72931	3.74231	-0.986995	0	0.29777	1.11435	-0.291163
00000011_1.tif	CX7389	Control	16.878	12.74	4.72931	1.91092	-2.81839	0	0.29777	0.569015	-0.831424
00000011_1.tif	CX7389	Control	16.297	12.858	4.72931	1.90312	-2.82618	0	0.29777	0.566693	-0.833725
00000011_1.tif	CX7389	Control	19.688	13.009	4.72931	4.05667	-0.672635	0	0.29777	1.20796	-0.198427
00000011_1.tif	CX7389	Control	19.082	13.198	4.72931	3.65962	-1.06969	0	0.29777	1.08973	-0.315558
00000011_1.tif	CX7389	Control	16.136	13.291	4.72931	2.33358	-2.39573	0	0.29777	0.69487	-0.70674
00000011_1.tif	CX7389	Control	12.638	13.397	4.72931	4.30711	-0.422196	0	0.29777	1.28253	-0.124548
00000011_1.tif	CX7389	Control	13.11	13.449	4.72931	3.95969	-0.769616	0	0.29777	1.17908	-0.227037
00000011_1.tif	CX7389	Control	13.102	13.567	4.72931	4.04107	-0.688235	0	0.29777	1.20331	-0.203029
00000011_1.tif	CX7389	Control	18.963	13.684	4.72931	3.88995	-0.83936	0	0.29777	1.15831	-0.247611
00000011_1.tif	CX7389	Control	7.844	13.954	4.72931	8.86557	4.13626	1	0.29777	2.6399	1.2202
00000011_1.tif	CX7389	Control	16.97	14.07	4.72931	3.20875	-1.52056	0	0.29777	0.955469	-0.448565
00000011_1.tif	CX7389	Control	12.687	14.073	4.72931	4.68617	-0.043135	0	0.29777	1.3954	-0.0127248
00000011_1.tif	CX7389	Control	18.488	14.147	4.72931	3.93189	-0.797424	0	0.29777	1.1708	-0.23524
00000011_1.tif	CX7389	Control	13.12	14.255	4.72931	4.50365	-0.225662	0	0.29777	1.34105	-0.0665704
00000011_1.tif	CX7389	Control	11.74	14.262	4.72931	5.54086	0.81155	1	0.29777	1.6499	0.239407
00000011_1.tif	CX7389	Control	11.698	14.413	4.72931	5.66543	0.936124	1	0.29777	1.687	0.276156
00000011_1.tif	CX7389	Control	19.665	14.417	4.72931	4.90451	0.1752	1	0.29777	1.46042	0.0516841
00000011_1.tif	CX7389	Control	19.643	14.473	4.72931	4.92872	0.199408	1	0.29777	1.46762	0.0588254
00000011_1.tif	CX7389	Control	8.85	14.478	4.72931	8.13859	3.40928	1	0.29777	2.42343	1.00574
00000011_1.tif	CX7389	Control	19.703	14.541	4.72931	5.01927	0.289965	1	0.29777	1.49459	0.0855398
00000011_1.tif	CX7389	Control	19.57	14.572	4.72931	4.94964	0.220329	1	0.29777	1.47385	0.0649972
00000011_1.tif	CX7389	Control	9.958	14.601	4.72931	7.21695	2.48764	1	0.29777	2.14899	0.733854
00000011_1.tif	CX7389	Control	9.964	14.661	4.72931	7.24226	2.51295	1	0.29777	2.15653	0.741322
00000011_1.tif	CX7389	Control	18.504	14.748	4.72931	4.44162	-0.287693	0	0.29777	1.32258	-0.0848693
00000011_1.tif	CX7389	Control	9.992	14.826	4.72931	7.30423	2.57493	1	0.29777	2.17498	0.759603
00000011_1.tif	CX7389	Control	7.513	14.964	4.72931	9.55529	4.82599	1	0.29777	2.84528	1.42367
00000011_1.tif	CX7389	Control	21.426	15.215	4.72931	6.74972	2.02041	1	0.29777	2.00986	0.596021
00000011_1.tif	CX7389	Control	16.648	15.234	4.72931	4.30067	-0.428637	0	0.29777	1.28061	-0.126448
00000011_1.tif	CX7389	Control	7.593	15.258	4.72931	9.61062	4.88131	1	0.29777	2.86175	1.43999
00000011_1.tif	CX7389	Control	16.666	15.295	4.72931	4.36326	-0.366047	0	0.29777	1.29925	-0.107984
00000011_1.tif	CX7389	Control	20.996	15.381	4.72931	6.53298	1.80367	1	0.29777	1.94532	0.532082
00000011_1.tif	CX7389	Control	16.413	15.801	4.72931	4.84822	0.118915	1	0.29777	1.44366	0.0350799
00000011_1.tif	CX7389	Control	16.464	15.875	4.72931	4.92474	0.195431	1	0.29777	1.46644	0.0576522
00000011_1.tif	CX7389	Control	18.805	15.911	4.72931	5.60187	0.872557	1	0.29777	1.66807	0.257404
00000011_1.tif	CX7389	Control	19.91	16.188	4.72931	6.4192	1.6899	1	0.29777	1.91145	0.498519
00000011_1.tif	CX7389	Control	17.021	16.182	4.72931	5.29	0.560688	1	0.29777	1.5752	0.165403
00000011_1.tif	CX7389	Control	20.242	16.331	4.72931	6.73083	2.00152	1	0.29777	2.00424	0.590448
00000011_1.tif	CX7389	Control	14.096	16.385	4.72931	5.81625	1.08694	1	0.29777	1.73191	0.320648
00000011_1.tif	CX7389	Control	14.011	16.409	4.72931	5.86964	1.14034	1	0.29777	1.7478	0.336399
00000011_1.tif	CX7389	Control	20.117	16.406	4.72931	6.71697	1.98767	1	0.29777	2.00011	0.586361
00000011_1.tif	CX7389	Control	20.197	16.534	4.72931	6.86759	2.13829	1	0.29777	2.04496	0.630794
00000011_1.tif	CX7389	Control	10.495	16.899	4.72931	8.22835	3.49904	1	0.29777	2.45016	1.03222
00000011_1.tif	CX7389	Control	15.478	17.427	4.72931	6.50785	1.77854	1	0.29777	1.93784	0.524668
0000003_12.tif	TU445	eud-1	11.348	3.913	5.29188	8.65285	3.36097	1	0.29777	2.57656	0.991487
0000003_12.tif	TU445	eud-1	11.35	4.149	5.29188	8.45172	3.15985	1	0.29777	2.51667	0.932155
0000003_12.tif	TU445	eud-1	14.647	6.333	5.29188	5.10052	-0.191351	0	0.29777	1.51878	-0.0564487
0000003_12.tif	TU445	eud-1	14.567	6.301	5.29188	5.15146	-0.140417	0	0.29777	1.53395	-0.0414231
0000003_12.tif	TU445	eud-1	12.978	6.511	5.29188	5.58601	0.294138	1	0.29777	1.66335	0.0867707
0000003_12.tif	TU445	eud-1	16.775	7.244	5.29188	4.13394	-1.15793	0	0.29777	1.23096	-0.341591
0000003_12.tif	TU445	eud-1	16.565	7.257	5.29188	4.08105	-1.21082	0	0.29777	1.21521	-0.357193
0000003_12.tif	TU445	eud-1	15.729	7.359	5.29188	3.9251	-1.36677	0	0.29777	1.16878	-0.403198
0000003_12.tif	TU445	eud-1	15.51	7.434	5.29188	3.86523	-1.42664	0	0.29777	1.15095	-0.420859
0000003_12.tif	TU445	eud-1	15.667	7.492	5.29188	3.79527	-1.49661	0	0.29777	1.13012	-0.4415
0000003_12.tif	TU445	eud-1	15.829	7.493	5.29188	3.78841	-1.50346	0	0.29777	1.12808	-0.443521
0000003_12.tif	TU445	eud-1	16.934	7.532	5.29188	3.89299	-1.39888	0	0.29777	1.15922	-0.41267
0000003_12.tif	TU445	eud-1	17.064	7.52	5.29188	3.94147	-1.35041	0	0.29777	1.17365	-0.398371
0000003_12.tif	TU445	eud-1	11.687	8.324	5.29188	5.13489	-0.15699	0	0.29777	1.52901	-0.046312
0000003_12.tif	TU445	eud-1	11.78	8.399	5.29188	5.01567	-0.276205	0	0.29777	1.49352	-0.0814806
0000003_12.tif	TU445	eud-1	15.347	8.406	5.29188	2.9249	-2.36697	0	0.29777	0.870949	-0.698256
0000003_12.tif	TU445	eud-1	13.873	8.458	5.29188	3.46662	-1.82525	0	0.29777	1.03226	-0.53845
0000003_12.tif	TU445	eud-1	6.931	8.676	5.29188	9.32524	4.03337	1	0.29777	2.77678	1.18984
0000003_12.tif	TU445	eud-1	6.984	8.681	5.29188	9.27296	3.98109	1	0.29777	2.76121	1.17442
0000003_12.tif	TU445	eud-1	14.88	8.716	5.29188	2.75486	-2.53702	0	0.29777	0.820314	-0.74842
0000003_12.tif	TU445	eud-1	11.221	8.943	5.29188	5.2172	-0.0746792	0	0.29777	1.55352	-0.0220304
0000003_12.tif	TU445	eud-1	12.598	9.104	5.29188	3.94255	-1.34933	0	0.29777	1.17397	-0.398051
0000003_12.tif	TU445	eud-1	13.662	9.47	5.29188	2.86731	-2.42457	0	0.29777	0.853798	-0.715248
0000003_12.tif	TU445	eud-1	13.325	9.499	5.29188	3.11915	-2.17272	0	0.29777	0.928791	-0.640953
0000003_12.tif	TU445	eud-1	19.579	9.732	5.29188	4.00563	-1.28625	0	0.29777	1.19276	-0.379444
0000003_12.tif	TU445	eud-1	13.7	9.954	5.29188	2.55639	-2.73548	0	0.29777	0.761218	-0.806967
0000003_12.tif	TU445	eud-1	13.843	10.001	5.29188	2.41001	-2.88186	0	0.29777	0.71763	-0.850149
0000003_12.tif	TU445	eud-1	14.384	10.17	5.29188	1.86744	-3.42444	0	0.29777	0.556067	-1.01021
0000003_12.tif	TU445	eud-1	6.426	10.211	5.29188	9.51933	4.22745	1	0.29777	2.83457	1.2471
0000003_12.tif	TU445	eud-1	19.115	10.374	5.29188	3.35493	-1.93695	0	0.29777	0.998997	-0.571399
0000003_12.tif	TU445	eud-1	14.459	10.432	5.29188	1.6596	-3.63227	0	0.29777	0.49418	-1.07152
0000003_12.tif	TU445	eud-1	12.84	10.502	5.29188	3.14307	-2.14881	0	0.29777	0.935911	-0.633899
0000003_12.tif	TU445	eud-1	9.738	10.509	5.29188	6.19529	0.903412	1	0.29777	1.84477	0.266507
0000003_12.tif	TU445	eud-1	14.471	10.502	5.29188	1.61438	-3.67749	0	0.29777	0.480715	-1.08486
0000003_12.tif	TU445	eud-1	9.903	10.578	5.29188	6.02317	0.731291	1	0.29777	1.79352	0.215731
0000003_12.tif	TU445	eud-1	9.846	10.661	5.29188	6.07074	0.778867	1	0.29777	1.80769	0.229766
0000003_12.tif	TU445	eud-1	12.688	10.698	5.29188	3.24972	-2.04215	0	0.29777	0.96767	-0.602435
0000003_12.tif	TU445	eud-1	6.336	10.96	5.29188	9.55439	4.26252	1	0.29777	2.84501	1.25744
0000003_12.tif	TU445	eud-1	12.31	11.005	5.29188	3.58564	-1.70624	0	0.29777	1.0677	-0.50334
0000003_12.tif	TU445	eud-1	17.617	11.028	5.29188	1.75038	-3.54149	0	0.29777	0.521211	-1.04474
0000003_12.tif	TU445	eud-1	5.295	11.032	5.29188	10.5929	5.30105	1	0.29777	3.15426	1.56381
0000003_12.tif	TU445	eud-1	5.221	11.126	5.29188	10.6651	5.37325	1	0.29777	3.17575	1.58511
0000003_12.tif	TU445	eud-1	5.847	11.108	5.29188	10.0395	4.74761	1	0.29777	2.98946	1.40055
0000003_12.tif	TU445	eud-1	5.302	11.167	5.29188	10.5836	5.29174	1	0.29777	3.15148	1.56106
0000003_12.tif	TU445	eud-1	16.35	11.285	5.29188	0.465017	-4.82686	0	0.29777	0.138468	-1.42392
0000003_12.tif	TU445	eud-1	16.862	11.364	5.29188	0.980519	-4.31136	0	0.29777	0.291969	-1.27185
0000003_12.tif	TU445	eud-1	17.362	11.488	5.29188	1.49143	-3.80044	0	0.29777	0.444105	-1.12113
0000003_12.tif	TU445	eud-1	17.152	11.612	5.29188	1.30952	-3.98235	0	0.29777	0.389937	-1.17479
0000003_12.tif	TU445	eud-1	13.926	11.68	5.29188	1.99922	-3.29266	0	0.29777	0.595308	-0.971333
0000003_12.tif	TU445	eud-1	16.384	11.715	5.29188	0.66133	-4.63055	0	0.29777	0.196924	-1.36601
0000003_12.tif	TU445	eud-1	6.861	11.722	5.29188	9.03477	3.74289	1	0.29777	2.69028	1.10415
0000003_12.tif	TU445	eud-1	13.103	11.947	5.29188	2.86061	-2.43127	0	0.29777	0.851803	-0.717224
0000003_12.tif	TU445	eud-1	7.459	12.296	5.29188	8.48691	3.19504	1	0.29777	2.52715	0.942536
0000003_12.tif	TU445	eud-1	16.383	12.384	5.29188	1.21021	-4.08166	0	0.29777	0.360365	-1.20409
0000003_12.tif	TU445	eud-1	18.348	12.365	5.29188	2.69099	-2.60089	0	0.29777	0.801296	-0.767261
0000003_12.tif	TU445	eud-1	7.76	12.431	5.29188	8.20598	2.91411	1	0.29777	2.44349	0.859661
0000003_12.tif	TU445	eud-1	18.277	12.469	5.29188	2.67077	-2.62111	0	0.29777	0.795275	-0.773226
0000003_12.tif	TU445	eud-1	18.239	12.554	5.29188	2.67616	-2.61571	0	0.29777	0.796881	-0.771635
0000003_12.tif	TU445	eud-1	18.245	12.672	5.29188	2.73943	-2.55244	0	0.29777	0.81572	-0.752971
0000003_12.tif	TU445	eud-1	6.177	12.957	5.29188	9.85161	4.55974	1	0.29777	2.93351	1.34512
0000003_12.tif	TU445	eud-1	13.251	12.985	5.29188	3.13713	-2.15475	0	0.29777	0.934143	-0.635651
0000003_12.tif	TU445	eud-1	8.222	13.159	5.29188	7.88977	2.59789	1	0.29777	2.34934	0.766378
0000003_12.tif	TU445	eud-1	8.304	13.194	5.29188	7.81864	2.52676	1	0.29777	2.32816	0.745395
0000003_12.tif	TU445	eud-1	10.437	13.426	5.29188	5.85506	0.563184	1	0.29777	1.74346	0.166139
0000003_12.tif	TU445	eud-1	9.71	13.503	5.29188	6.56261	1.27074	1	0.29777	1.95415	0.374868
0000003_12.tif	TU445	eud-1	9.621	13.5	5.29188	6.64542	1.35355	1	0.29777	1.97881	0.399297
0000003_12.tif	TU445	eud-1	9.493	13.603	5.29188	6.80069	1.50881	1	0.29777	2.02504	0.445099
0000003_12.tif	TU445	eud-1	15.382	14.129	5.29188	2.89208	-2.3998	0	0.29777	0.861174	-0.70794
0000003_12.tif	TU445	eud-1	15.391	14.236	5.29188	2.99601	-2.29587	0	0.29777	0.892121	-0.677281
0000003_12.tif	TU445	eud-1	15.462	14.272	5.29188	3.02076	-2.27111	0	0.29777	0.899493	-0.669978
0000003_12.tif	TU445	eud-1	9.1	14.268	5.29188	7.41339	2.12152	1	0.29777	2.20749	0.625848
0000003_12.tif	TU445	eud-1	9.501	14.336	5.29188	7.07732	1.78545	1	0.29777	2.10741	0.526707
0000003_12.tif	TU445	eud-1	7.567	15.133	5.29188	9.16663	3.87475	1	0.29777	2.72955	1.14305
0000003_12.tif	TU445	eud-1	9.438	16.127	5.29188	8.0652	2.77333	1	0.29777	2.40158	0.818132
0000003_12.tif	TU445	eud-1	9.425	16.248	5.29188	8.14878	2.85691	1	0.29777	2.42646	0.842788
0000003_12.tif	TU445	eud-1	9.506	16.491	5.29188	8.23625	2.94437	1	0.29777	2.45251	0.868589
0000003_12.tif	TU445	eud-1	9.663	16.538	5.29188	8.14551	2.85363	1	0.29777	2.42549	0.841822
0000003_12.tif	TU445	eud-1	9.687	16.797	5.29188	8.29708	3.0052	1	0.29777	2.47062	0.886534
0000003_12.tif	TU445	eud-1	8.865	16.981	5.29188	9.0427	3.75082	1	0.29777	2.69264	1.10649
0000003_12.tif	TU445	eud-1	8.683	17.127	5.29188	9.27602	3.98414	1	0.29777	2.76212	1.17532
0000003_12.tif	TU445	eud-1	9.122	18.082	5.29188	9.59123	4.29936	1	0.29777	2.85598	1.26831
0000003_12.tif	TU445	eud-1	17.332	18.483	5.29188	7.34592	2.05405	1	0.29777	2.1874	0.605945
0000003_12.tif	TU445	eud-1	19.81	18.536	5.29188	8.24868	2.9568	1	0.29777	2.45621	0.872256
0000003_12.tif	TU445	eud-1	17.11	18.677	5.29188	7.49676	2.20489	1	0.29777	2.23231	0.650441
0000003_12.tif	TU445	eud-1	12.187	19.962	5.29188	9.43583	4.14396	1	0.29777	2.80971	1.22247
0000003_12.tif	TU445	eud-1	19.881	20.132	5.29188	9.71124	4.41937	1	0.29777	2.89172	1.30371
0000003_12.tif	TU445	eud-1	20.411	20.21	5.29188	10.0106	4.7187	1	0.29777	2.98085	1.39202
0000003_12.tif	TU445	eud-1	7.119	20.291	5.29188	12.5707	7.27884	1	0.29777	3.74318	2.14726
0000003_12.tif	TU445	eud-1	18.824	20.374	5.29188	9.55617	4.26429	1	0.29777	2.84554	1.25797
0000003_12.tif	TU445	eud-1	18.733	20.501	5.29188	9.64984	4.35797	1	0.29777	2.87343	1.2856
0000006_11.tif	TU445	eud-1	21.695	3.738	5.23445	10.8195	5.58504	1	0.29777	3.22172	1.64759
0000006_11.tif	TU445	eud-1	21.576	3.772	5.23445	10.7242	5.48973	1	0.29777	3.19334	1.61947
0000006_11.tif	TU445	eud-1	21.786	3.796	5.23445	10.824	5.58956	1	0.29777	3.22306	1.64892
0000006_11.tif	TU445	eud-1	20.829	5.863	5.23445	8.59307	3.35862	1	0.29777	2.55876	0.990792
0000006_11.tif	TU445	eud-1	19.155	5.875	5.23445	7.66788	2.43343	1	0.29777	2.28327	0.717862
0000006_11.tif	TU445	eud-1	18.82	5.948	5.23445	7.45042	2.21597	1	0.29777	2.21851	0.653711
0000006_11.tif	TU445	eud-1	20.926	6.032	5.23445	8.5213	3.28685	1	0.29777	2.53739	0.96962
0000006_11.tif	TU445	eud-1	21.304	6.526	5.23445	8.39859	3.16414	1	0.29777	2.50085	0.93342
0000006_11.tif	TU445	eud-1	22.775	7.334	5.23445	8.96706	3.73261	1	0.29777	2.67012	1.10112
0000006_11.tif	TU445	eud-1	14.826	7.354	5.23445	5.33594	0.101485	1	0.29777	1.58888	0.029938
0000006_11.tif	TU445	eud-1	14.9	7.533	5.23445	5.14881	-0.0856383	0	0.29777	1.53316	-0.0252633
0000006_11.tif	TU445	eud-1	22.033	7.967	5.23445	7.99465	2.7602	1	0.29777	2.38057	0.814259
0000006_11.tif	TU445	eud-1	19.564	8.305	5.23445	5.91077	0.676317	1	0.29777	1.76005	0.199514
0000006_11.tif	TU445	eud-1	15.989	8.343	5.23445	4.32067	-0.913784	0	0.29777	1.28657	-0.269566
0000006_11.tif	TU445	eud-1	12.495	8.381	5.23445	5.24045	0.00599773	1	0.29777	1.56045	0.00176933
0000006_11.tif	TU445	eud-1	12.467	8.424	5.23445	5.22202	-0.0124315	0	0.29777	1.55496	-0.00366729
0000006_11.tif	TU445	eud-1	20.021	8.432	5.23445	6.14267	0.908216	1	0.29777	1.8291	0.267924
0000006_11.tif	TU445	eud-1	12.582	8.538	5.23445	5.0622	-0.172255	0	0.29777	1.50737	-0.0508151
0000006_11.tif	TU445	eud-1	15.107	8.711	5.23445	3.95455	-1.2799	0	0.29777	1.17755	-0.37757
0000006_11.tif	TU445	eud-1	20.895	8.805	5.23445	6.58149	1.34704	1	0.29777	1.95977	0.397376
0000006_11.tif	TU445	eud-1	21.549	9.016	5.23445	7.01175	1.7773	1	0.29777	2.08789	0.524303
0000006_11.tif	TU445	eud-1	18.577	9.328	5.23445	4.48964	-0.744811	0	0.29777	1.33688	-0.219719
0000006_11.tif	TU445	eud-1	15.547	9.65	5.23445	2.991	-2.24345	0	0.29777	0.89063	-0.661818
0000006_11.tif	TU445	eud-1	19.438	9.679	5.23445	4.89013	-0.344326	0	0.29777	1.45613	-0.101576
0000006_11.tif	TU445	eud-1	15.668	9.679	5.23445	2.96447	-2.26998	0	0.29777	0.88273	-0.669644
0000006_11.tif	TU445	eud-1	18.139	10.286	5.23445	3.50207	-1.73238	0	0.29777	1.04281	-0.511053
0000006_11.tif	TU445	eud-1	18.217	10.303	5.23445	3.54896	-1.68549	0	0.29777	1.05677	-0.497219
0000006_11.tif	TU445	eud-1	12.23	10.423	5.23445	3.99024	-1.24421	0	0.29777	1.18817	-0.367042
0000006_11.tif	TU445	eud-1	12.335	10.702	5.23445	3.75189	-1.48256	0	0.29777	1.1172	-0.437356
0000006_11.tif	TU445	eud-1	18.999	10.697	5.23445	3.96175	-1.2727	0	0.29777	1.17969	-0.375448
0000006_11.tif	TU445	eud-1	19.11	10.91	5.23445	3.96123	-1.27322	0	0.29777	1.17953	-0.375601
0000006_11.tif	TU445	eud-1	19.184	10.918	5.23445	4.02449	-1.20996	0	0.29777	1.19837	-0.356939
0000006_11.tif	TU445	eud-1	15.214	11.236	5.23445	1.44392	-3.79053	0	0.29777	0.429957	-1.11821
0000006_11.tif	TU445	eud-1	23.236	11.451	5.23445	7.78054	2.54609	1	0.29777	2.31681	0.751097
0000006_11.tif	TU445	eud-1	12.979	11.611	5.23445	2.76686	-2.46759	0	0.29777	0.823888	-0.727939
0000006_11.tif	TU445	eud-1	13.1	11.744	5.23445	2.60623	-2.62822	0	0.29777	0.776056	-0.775326
0000006_11.tif	TU445	eud-1	18.726	11.99	5.23445	3.24497	-1.98948	0	0.29777	0.966255	-0.586896
0000006_11.tif	TU445	eud-1	15.395	12.165	5.23445	0.49968	-4.73477	0	0.29777	0.14879	-1.39676
0000006_11.tif	TU445	eud-1	15.674	12.251	5.23445	0.410157	-4.82429	0	0.29777	0.122133	-1.42317
0000006_11.tif	TU445	eud-1	17.688	12.315	5.23445	2.16568	-3.06877	0	0.29777	0.644874	-0.905288
0000006_11.tif	TU445	eud-1	18.956	12.42	5.23445	3.41616	-1.8183	0	0.29777	1.01723	-0.536397
0000006_11.tif	TU445	eud-1	13.478	12.59	5.23445	2.06963	-3.16482	0	0.29777	0.616273	-0.933623
0000006_11.tif	TU445	eud-1	20.735	12.637	5.23445	5.188	-0.0464496	0	0.29777	1.54483	-0.0137026
0000006_11.tif	TU445	eud-1	19.074	13.547	5.23445	3.64151	-1.59295	0	0.29777	1.08433	-0.469919
0000006_11.tif	TU445	eud-1	16.995	14.988	5.23445	2.75774	-2.47671	0	0.29777	0.821171	-0.730631
0000006_11.tif	TU445	eud-1	16.876	14.99	5.23445	2.6989	-2.53555	0	0.29777	0.80365	-0.747989
0000006_11.tif	TU445	eud-1	16.572	15.029	5.23445	2.59869	-2.63577	0	0.29777	0.773811	-0.777551
0000006_11.tif	TU445	eud-1	16.622	15.649	5.23445	3.19432	-2.04013	0	0.29777	0.951173	-0.601838
0000006_11.tif	TU445	eud-1	14.275	15.799	5.23445	3.40455	-1.8299	0	0.29777	1.01377	-0.539821
0000006_11.tif	TU445	eud-1	23.498	15.891	5.23445	8.58958	3.35513	1	0.29777	2.55772	0.989763
0000006_11.tif	TU445	eud-1	17.625	16.192	5.23445	4.11433	-1.12012	0	0.29777	1.22512	-0.330437
0000006_11.tif	TU445	eud-1	14.28	17.857	5.23445	5.36768	0.133225	1	0.29777	1.59833	0.0393013
0000006_10.tif	TU445	eud-1	12.951	3.02	5.20851	7.9289	2.72039	1	0.29777	2.36099	0.802514
0000006_10.tif	TU445	eud-1	14.468	3.599	5.20851	7.28911	2.0806	1	0.29777	2.17048	0.613777
0000006_10.tif	TU445	eud-1	14.157	3.779	5.20851	7.09712	1.88861	1	0.29777	2.11331	0.557139
0000006_10.tif	TU445	eud-1	14.102	3.823	5.20851	7.05236	1.84385	1	0.29777	2.09998	0.543934
0000006_10.tif	TU445	eud-1	14.149	4.089	5.20851	6.78703	1.57851	1	0.29777	2.02097	0.465662
0000006_10.tif	TU445	eud-1	14.036	4.533	5.20851	6.342	1.13349	1	0.29777	1.88846	0.33438
0000006_10.tif	TU445	eud-1	14.268	4.94	5.20851	5.93973	0.731218	1	0.29777	1.76867	0.215709
0000006_10.tif	TU445	eud-1	13.003	4.957	5.20851	6.00662	0.79811	1	0.29777	1.78859	0.235442
0000006_10.tif	TU445	eud-1	12.889	4.996	5.20851	5.98889	0.780378	1	0.29777	1.78331	0.230212
0000006_10.tif	TU445	eud-1	12.298	5.322	5.20851	5.81714	0.608626	1	0.29777	1.73217	0.179545
0000006_10.tif	TU445	eud-1	11.767	5.379	5.20851	5.94405	0.735537	1	0.29777	1.76996	0.216983
0000006_10.tif	TU445	eud-1	13.667	5.371	5.20851	5.51602	0.307511	1	0.29777	1.64251	0.0907158
0000006_10.tif	TU445	eud-1	13.666	5.595	5.20851	5.2926	0.084089	1	0.29777	1.57598	0.0248063
0000006_10.tif	TU445	eud-1	10.593	6.033	5.20851	5.93842	0.729906	1	0.29777	1.76828	0.215322
0000006_10.tif	TU445	eud-1	10.794	6.235	5.20851	5.65754	0.449029	1	0.29777	1.68465	0.132464
0000006_10.tif	TU445	eud-1	15.624	6.308	5.20851	4.83685	-0.37166	0	0.29777	1.44027	-0.10964
0000006_10.tif	TU445	eud-1	15.64	6.405	5.20851	4.75077	-0.457746	0	0.29777	1.41464	-0.135035
0000006_10.tif	TU445	eud-1	15.881	7.011	5.20851	4.28404	-0.924472	0	0.29777	1.27566	-0.272719
0000006_10.tif	TU445	eud-1	12.447	7.151	5.20851	4.04688	-1.16163	0	0.29777	1.20504	-0.342682
0000006_10.tif	TU445	eud-1	15.188	7.18	5.20851	3.87191	-1.3366	0	0.29777	1.15294	-0.394298
0000006_10.tif	TU445	eud-1	13.515	7.234	5.20851	3.67738	-1.53113	0	0.29777	1.09501	-0.451683
0000006_10.tif	TU445	eud-1	11.868	7.271	5.20851	4.20326	-1.00525	0	0.29777	1.2516	-0.29655
0000006_10.tif	TU445	eud-1	14.296	7.524	5.20851	3.36146	-1.84705	0	0.29777	1.00094	-0.54488
0000006_10.tif	TU445	eud-1	16.356	7.587	5.20851	4.02698	-1.18153	0	0.29777	1.19911	-0.348552
0000006_10.tif	TU445	eud-1	11.746	7.614	5.20851	3.98188	-1.22663	0	0.29777	1.18568	-0.361857
0000006_10.tif	TU445	eud-1	16.928	7.624	5.20851	4.35449	-0.854019	0	0.29777	1.29664	-0.251936
0000006_10.tif	TU445	eud-1	13.86	7.747	5.20851	3.13267	-2.07584	0	0.29777	0.932815	-0.612373
0000006_10.tif	TU445	eud-1	11.736	7.744	5.20851	3.88203	-1.32648	0	0.29777	1.15595	-0.391311
0000006_10.tif	TU445	eud-1	14.008	7.759	5.20851	3.11608	-2.09243	0	0.29777	0.927877	-0.617266
0000006_10.tif	TU445	eud-1	17.047	7.805	5.20851	4.30362	-0.904891	0	0.29777	1.28149	-0.266943
0000006_10.tif	TU445	eud-1	15.796	7.839	5.20851	3.51177	-1.69674	0	0.29777	1.0457	-0.500539
0000006_10.tif	TU445	eud-1	14.165	7.841	5.20851	3.03696	-2.17155	0	0.29777	0.904315	-0.640609
0000006_10.tif	TU445	eud-1	11.629	8.207	5.20851	3.58996	-1.61855	0	0.29777	1.06898	-0.477472
0000006_10.tif	TU445	eud-1	10.65	8.24	5.20851	4.28654	-0.921977	0	0.29777	1.2764	-0.271983
0000006_10.tif	TU445	eud-1	11.692	8.496	5.20851	3.33625	-1.87226	0	0.29777	0.993435	-0.552317
0000006_10.tif	TU445	eud-1	11.618	8.549	5.20851	3.35154	-1.85697	0	0.29777	0.997989	-0.547806
0000006_10.tif	TU445	eud-1	11.427	8.604	5.20851	3.45518	-1.75333	0	0.29777	1.02885	-0.517233
0000006_10.tif	TU445	eud-1	12.308	8.856	5.20851	2.65426	-2.55425	0	0.29777	0.790359	-0.753505
0000006_10.tif	TU445	eud-1	12.443	8.883	5.20851	2.54751	-2.661	0	0.29777	0.758572	-0.784996
0000006_10.tif	TU445	eud-1	14.766	9.476	5.20851	1.58032	-3.62819	0	0.29777	0.470573	-1.07032
0000006_10.tif	TU445	eud-1	17.263	9.617	5.20851	3.4682	-1.74032	0	0.29777	1.03272	-0.513393
0000006_10.tif	TU445	eud-1	18.121	9.842	5.20851	4.21843	-0.990078	0	0.29777	1.25612	-0.292073
0000006_10.tif	TU445	eud-1	14.109	9.93	5.20851	0.948214	-4.2603	0	0.29777	0.28235	-1.25679
0000006_10.tif	TU445	eud-1	17.384	10.034	5.20851	3.45686	-1.75165	0	0.29777	1.02935	-0.516737
0000006_10.tif	TU445	eud-1	14.109	10.032	5.20851	0.846601	-4.36191	0	0.29777	0.252092	-1.28676
0000006_10.tif	TU445	eud-1	17.522	10.067	5.20851	3.58329	-1.62523	0	0.29777	1.067	-0.479441
0000006_10.tif	TU445	eud-1	15.744	10.197	5.20851	1.8423	-3.36622	0	0.29777	0.54858	-0.993034
0000006_10.tif	TU445	eud-1	17.153	10.244	5.20851	3.18513	-2.02338	0	0.29777	0.948436	-0.596898
0000006_10.tif	TU445	eud-1	13.157	10.324	5.20851	1.03319	-4.17532	0	0.29777	0.307652	-1.23172
0000006_10.tif	TU445	eud-1	14.791	10.358	5.20851	0.919178	-4.28933	0	0.29777	0.273704	-1.26535
0000006_10.tif	TU445	eud-1	12.997	10.483	5.20851	1.10581	-4.1027	0	0.29777	0.329278	-1.2103
0000006_10.tif	TU445	eud-1	16.601	10.531	5.20851	2.59292	-2.61559	0	0.29777	0.772094	-0.7716
0000006_10.tif	TU445	eud-1	14.406	10.724	5.20851	0.40426	-4.80425	0	0.29777	0.120376	-1.41725
0000006_10.tif	TU445	eud-1	15.28	10.948	5.20851	1.25113	-3.95738	0	0.29777	0.372549	-1.16743
0000006_10.tif	TU445	eud-1	10.844	11.014	5.20851	3.19003	-2.01848	0	0.29777	0.949895	-0.595452
0000006_10.tif	TU445	eud-1	10.903	11.003	5.20851	3.13062	-2.07789	0	0.29777	0.932204	-0.612979
0000006_10.tif	TU445	eud-1	9.744	11.127	5.20851	4.2944	-0.914112	0	0.29777	1.27874	-0.269663
0000006_10.tif	TU445	eud-1	10.911	11.142	5.20851	3.1314	-2.07711	0	0.29777	0.932438	-0.612747
0000006_10.tif	TU445	eud-1	10.315	11.616	5.20851	3.78916	-1.41935	0	0.29777	1.1283	-0.418709
0000006_10.tif	TU445	eud-1	10.443	11.636	5.20851	3.66781	-1.5407	0	0.29777	1.09217	-0.454506
0000006_10.tif	TU445	eud-1	17.78	11.769	5.20851	3.85412	-1.35439	0	0.29777	1.14764	-0.399546
0000006_10.tif	TU445	eud-1	10.341	11.8	5.20851	3.80417	-1.40434	0	0.29777	1.13277	-0.41428
0000006_10.tif	TU445	eud-1	9.249	11.807	5.20851	4.87198	-0.336536	0	0.29777	1.45073	-0.0992782
0000006_10.tif	TU445	eud-1	15.258	11.863	5.20851	1.57533	-3.63318	0	0.29777	0.469087	-1.07179
0000006_10.tif	TU445	eud-1	11.212	12.152	5.20851	3.09475	-2.11376	0	0.29777	0.921524	-0.623559
0000006_10.tif	TU445	eud-1	16.349	12.271	5.20851	2.70591	-2.5026	0	0.29777	0.805738	-0.738268
0000006_10.tif	TU445	eud-1	16.387	12.407	5.20851	2.8103	-2.39822	0	0.29777	0.836822	-0.707474
0000006_10.tif	TU445	eud-1	13.068	12.556	5.20851	1.9373	-3.27121	0	0.29777	0.57687	-0.965008
0000006_10.tif	TU445	eud-1	13.168	12.565	5.20851	1.8976	-3.31092	0	0.29777	0.565047	-0.97672
0000006_10.tif	TU445	eud-1	13.548	12.607	5.20851	1.79809	-3.41043	0	0.29777	0.535416	-1.00608
0000006_10.tif	TU445	eud-1	13.231	12.666	5.20851	1.96155	-3.24696	0	0.29777	0.584091	-0.957854
0000006_10.tif	TU445	eud-1	14.046	12.682	5.20851	1.80706	-3.40145	0	0.29777	0.538089	-1.00343
0000006_10.tif	TU445	eud-1	13.295	12.741	5.20851	2.0059	-3.20261	0	0.29777	0.597298	-0.944769
0000006_10.tif	TU445	eud-1	10.527	12.82	5.20851	4.00762	-1.20089	0	0.29777	1.19335	-0.354262
0000006_10.tif	TU445	eud-1	14.152	12.841	5.20851	1.96972	-3.23879	0	0.29777	0.586524	-0.955444
0000006_10.tif	TU445	eud-1	17.898	13.136	5.20851	4.47949	-0.729024	0	0.29777	1.33386	-0.215062
0000006_10.tif	TU445	eud-1	11.579	13.14	5.20851	3.33804	-1.87047	0	0.29777	0.993969	-0.551788
0000006_10.tif	TU445	eud-1	11.438	13.161	5.20851	3.4568	-1.75172	0	0.29777	1.02933	-0.516756
0000006_10.tif	TU445	eud-1	7.373	13.237	5.20851	7.06456	1.85605	1	0.29777	2.10361	0.547534
0000006_10.tif	TU445	eud-1	7.449	13.258	5.20851	7.0001	1.79159	1	0.29777	2.08442	0.528519
0000006_10.tif	TU445	eud-1	17.831	13.349	5.20851	4.53439	-0.674124	0	0.29777	1.3502	-0.198867
0000006_10.tif	TU445	eud-1	17.733	13.517	5.20851	4.54807	-0.660439	0	0.29777	1.35428	-0.194829
0000006_10.tif	TU445	eud-1	17.66	13.652	5.20851	4.56961	-0.638898	0	0.29777	1.36069	-0.188475
0000006_10.tif	TU445	eud-1	11.457	13.803	5.20851	3.89855	-1.30997	0	0.29777	1.16087	-0.38644
0000006_10.tif	TU445	eud-1	10.993	13.959	5.20851	4.32903	-0.879482	0	0.29777	1.28906	-0.259447
0000006_10.tif	TU445	eud-1	11.612	14.033	5.20851	3.97801	-1.23051	0	0.29777	1.18453	-0.363
0000006_10.tif	TU445	eud-1	18.415	14.075	5.20851	5.42766	0.219145	1	0.29777	1.61619	0.0646477
0000006_10.tif	TU445	eud-1	18.796	14.158	5.20851	5.78648	0.577965	1	0.29777	1.72304	0.1705
0000006_10.tif	TU445	eud-1	17.551	14.122	5.20851	4.78888	-0.419628	0	0.29777	1.42599	-0.12379
0000006_10.tif	TU445	eud-1	11.677	14.145	5.20851	4.02917	-1.17934	0	0.29777	1.19977	-0.347906
0000006_10.tif	TU445	eud-1	11.601	14.184	5.20851	4.10541	-1.1031	0	0.29777	1.22247	-0.325415
0000006_10.tif	TU445	eud-1	17.026	14.245	5.20851	4.50854	-0.699973	0	0.29777	1.34251	-0.206492
0000006_10.tif	TU445	eud-1	18.151	14.313	5.20851	5.36603	0.157515	1	0.29777	1.59784	0.0464669
0000006_10.tif	TU445	eud-1	16.675	14.508	5.20851	4.49326	-0.715248	0	0.29777	1.33796	-0.210998
0000006_10.tif	TU445	eud-1	13.461	14.827	5.20851	3.99289	-1.21562	0	0.29777	1.18896	-0.358607
0000006_10.tif	TU445	eud-1	8.808	14.86	5.20851	6.56962	1.36111	1	0.29777	1.95624	0.401528
0000006_10.tif	TU445	eud-1	14.822	15.228	5.20851	4.42428	-0.784228	0	0.29777	1.31742	-0.231347
0000006_10.tif	TU445	eud-1	12.849	15.233	5.20851	4.51545	-0.693062	0	0.29777	1.34457	-0.204453
0000006_10.tif	TU445	eud-1	13.233	15.285	5.20851	4.48162	-0.726893	0	0.29777	1.33449	-0.214434
0000006_10.tif	TU445	eud-1	14.455	15.295	5.20851	4.44029	-0.768222	0	0.29777	1.32219	-0.226625
0000006_10.tif	TU445	eud-1	14.479	15.392	5.20851	4.53916	-0.66935	0	0.29777	1.35163	-0.197458
0000006_10.tif	TU445	eud-1	13.675	16.853	5.20851	5.98859	0.780079	1	0.29777	1.78322	0.230123
0000006_10.tif	TU445	eud-1	14.21	18.175	5.20851	7.30219	2.09368	1	0.29777	2.17437	0.617636
0000008_11.tif	TU445	eud-1	19.462	4.771	5.56255	8.50206	2.93951	1	0.29777	2.53166	0.867155
0000008_11.tif	TU445	eud-1	13.977	6.069	5.56255	6.04287	0.480318	1	0.29777	1.79938	0.141694
0000008_11.tif	TU445	eud-1	14.056	6.266	5.56255	5.83534	0.272796	1	0.29777	1.73759	0.0804748
0000008_11.tif	TU445	eud-1	19.63	6.9	5.56255	6.88967	1.32712	1	0.29777	2.05154	0.3915
0000008_11.tif	TU445	eud-1	15.261	7.175	5.56255	4.85194	-0.710609	0	0.29777	1.44476	-0.20963
0000008_11.tif	TU445	eud-1	13.916	7.304	5.56255	4.8447	-0.717849	0	0.29777	1.44261	-0.211766
0000008_11.tif	TU445	eud-1	15.429	7.404	5.56255	4.63499	-0.927557	0	0.29777	1.38016	-0.273629
0000008_11.tif	TU445	eud-1	14.52	7.466	5.56255	4.58247	-0.980079	0	0.29777	1.36452	-0.289123
0000008_11.tif	TU445	eud-1	14.199	7.673	5.56255	4.42502	-1.13753	0	0.29777	1.31764	-0.335571
0000008_11.tif	TU445	eud-1	22.053	7.764	5.56255	8.22016	2.65761	1	0.29777	2.44772	0.783996
0000008_11.tif	TU445	eud-1	22.344	7.797	5.56255	8.4539	2.89136	1	0.29777	2.51732	0.85295
0000008_11.tif	TU445	eud-1	22.033	7.865	5.56255	8.1511	2.58855	1	0.29777	2.42715	0.763623
0000008_11.tif	TU445	eud-1	22.276	7.879	5.56255	8.35411	2.79156	1	0.29777	2.4876	0.823511
0000008_11.tif	TU445	eud-1	13.573	7.926	5.56255	4.34347	-1.21908	0	0.29777	1.29335	-0.359628
0000008_11.tif	TU445	eud-1	22.272	7.935	5.56255	8.323	2.76046	1	0.29777	2.47834	0.814334
0000008_11.tif	TU445	eud-1	22.265	8.125	5.56255	8.22523	2.66268	1	0.29777	2.44923	0.78549
0000008_11.tif	TU445	eud-1	22.117	8.479	5.56255	7.93089	2.36834	1	0.29777	2.36158	0.69866
0000008_11.tif	TU445	eud-1	21.107	8.583	5.56255	6.98994	1.42739	1	0.29777	2.08139	0.42108
0000008_11.tif	TU445	eud-1	16.893	8.94	5.56255	3.60513	-1.95742	0	0.29777	1.0735	-0.577439
0000008_11.tif	TU445	eud-1	17.027	9.022	5.56255	3.60805	-1.9545	0	0.29777	1.07437	-0.576577
0000008_11.tif	TU445	eud-1	14.394	9.046	5.56255	3.04035	-2.52219	0	0.29777	0.905326	-0.744047
0000008_11.tif	TU445	eud-1	23.811	9.092	5.56255	9.26516	3.70261	1	0.29777	2.75889	1.09227
0000008_11.tif	TU445	eud-1	18.604	9.223	5.56255	4.54606	-1.01649	0	0.29777	1.35368	-0.299863
0000008_11.tif	TU445	eud-1	15.909	9.234	5.56255	2.92505	-2.6375	0	0.29777	0.870992	-0.778062
0000008_11.tif	TU445	eud-1	20.22	9.26	5.56255	5.88666	0.324107	1	0.29777	1.75287	0.0956117
0000008_11.tif	TU445	eud-1	16.045	9.276	5.56255	2.92978	-2.63277	0	0.29777	0.8724	-0.776667
0000008_11.tif	TU445	eud-1	18.709	9.319	5.56255	4.57189	-0.990662	0	0.29777	1.36137	-0.292245
0000008_11.tif	TU445	eud-1	18.802	9.355	5.56255	4.62639	-0.936155	0	0.29777	1.3776	-0.276166
0000008_11.tif	TU445	eud-1	20.972	9.408	5.56255	6.4994	0.936849	1	0.29777	1.93533	0.27637
0000008_11.tif	TU445	eud-1	20.969	9.513	5.56255	6.45514	0.892586	1	0.29777	1.92215	0.263313
0000008_11.tif	TU445	eud-1	20.426	9.536	5.56255	5.94889	0.386338	1	0.29777	1.7714	0.11397
0000008_11.tif	TU445	eud-1	11.917	9.721	5.56255	3.86326	-1.69928	0	0.29777	1.15036	-0.501289
0000008_11.tif	TU445	eud-1	16.567	9.811	5.56255	2.69708	-2.86547	0	0.29777	0.803108	-0.845315
0000008_11.tif	TU445	eud-1	19.105	9.991	5.56255	4.5607	-1.00185	0	0.29777	1.35804	-0.295546
0000008_11.tif	TU445	eud-1	19.457	10.209	5.56255	4.79181	-0.770739	0	0.29777	1.42686	-0.227368
0000008_11.tif	TU445	eud-1	19.178	10.509	5.56255	4.42344	-1.13911	0	0.29777	1.31717	-0.336038
0000008_11.tif	TU445	eud-1	15.316	11.266	5.56255	0.810586	-4.75196	0	0.29777	0.241368	-1.40183
0000008_11.tif	TU445	eud-1	11.074	11.643	5.56255	3.96506	-1.59749	0	0.29777	1.18068	-0.471259
0000008_11.tif	TU445	eud-1	16.579	11.707	5.56255	1.58933	-3.97322	0	0.29777	0.473254	-1.1721
0000008_11.tif	TU445	eud-1	16.314	11.83	5.56255	1.30703	-4.25552	0	0.29777	0.389195	-1.25538
0000008_11.tif	TU445	eud-1	19.605	11.834	5.56255	4.58781	-0.974736	0	0.29777	1.36611	-0.287547
0000008_11.tif	TU445	eud-1	15.773	12.304	5.56255	0.803488	-4.75906	0	0.29777	0.239255	-1.40392
0000008_11.tif	TU445	eud-1	14.605	12.558	5.56255	0.679283	-4.88327	0	0.29777	0.20227	-1.44056
0000008_11.tif	TU445	eud-1	15.516	12.763	5.56255	0.891958	-4.67059	0	0.29777	0.265598	-1.37782
0000008_11.tif	TU445	eud-1	11.653	13.142	5.56255	3.54966	-2.01289	0	0.29777	1.05698	-0.593803
0000008_11.tif	TU445	eud-1	12.893	13.249	5.56255	2.4569	-3.10565	0	0.29777	0.731592	-0.916166
0000008_11.tif	TU445	eud-1	12.804	13.264	5.56255	2.54168	-3.02087	0	0.29777	0.756836	-0.891156
0000008_11.tif	TU445	eud-1	12.653	13.379	5.56255	2.72976	-2.83279	0	0.29777	0.812841	-0.835673
0000008_11.tif	TU445	eud-1	15.996	13.454	5.56255	1.73324	-3.82931	0	0.29777	0.516106	-1.12965
0000008_11.tif	TU445	eud-1	18.849	13.67	5.56255	4.16807	-1.39448	0	0.29777	1.24113	-0.411372
0000008_11.tif	TU445	eud-1	18.648	13.878	5.56255	4.07475	-1.4878	0	0.29777	1.21334	-0.438901
0000008_11.tif	TU445	eud-1	10.965	14.077	5.56255	4.54734	-1.01521	0	0.29777	1.35406	-0.299488
0000008_11.tif	TU445	eud-1	10.788	14.14	5.56255	4.73376	-0.828792	0	0.29777	1.40957	-0.244494
0000008_11.tif	TU445	eud-1	21.825	14.199	5.56255	7.1441	1.58155	1	0.29777	2.1273	0.466556
0000008_11.tif	TU445	eud-1	16.791	14.275	5.56255	2.86591	-2.69664	0	0.29777	0.853381	-0.79551
0000008_11.tif	TU445	eud-1	21.621	14.305	5.56255	6.98403	1.42148	1	0.29777	2.07963	0.419337
0000008_11.tif	TU445	eud-1	11.679	14.61	5.56255	4.22752	-1.33503	0	0.29777	1.25883	-0.393835
0000008_11.tif	TU445	eud-1	16.875	14.627	5.56255	3.19821	-2.36434	0	0.29777	0.952331	-0.69748
0000008_11.tif	TU445	eud-1	18.811	14.669	5.56255	4.62342	-0.93913	0	0.29777	1.37672	-0.277043
0000008_11.tif	TU445	eud-1	17.946	14.72	5.56255	3.97998	-1.58257	0	0.29777	1.18512	-0.466858
0000008_11.tif	TU445	eud-1	12.017	14.77	5.56255	4.07198	-1.49057	0	0.29777	1.21251	-0.439718
0000008_11.tif	TU445	eud-1	16.55	14.853	5.56255	3.21839	-2.34415	0	0.29777	0.958341	-0.691525
0000008_11.tif	TU445	eud-1	12.398	14.867	5.56255	3.87038	-1.69217	0	0.29777	1.15248	-0.49919
0000008_11.tif	TU445	eud-1	11.782	15.449	5.56255	4.71617	-0.846374	0	0.29777	1.40434	-0.24968
0000008_11.tif	TU445	eud-1	14.45	15.484	5.56255	3.50976	-2.05279	0	0.29777	1.0451	-0.605573
0000008_11.tif	TU445	eud-1	13.185	15.516	5.56255	3.9479	-1.61465	0	0.29777	1.17557	-0.476321
0000008_11.tif	TU445	eud-1	13.327	15.656	5.56255	4.01034	-1.5522	0	0.29777	1.19416	-0.4579
0000008_11.tif	TU445	eud-1	11.061	15.689	5.56255	5.39776	-0.164788	0	0.29777	1.60729	-0.0486124
0000008_11.tif	TU445	eud-1	10.545	15.948	5.56255	5.95449	0.391937	1	0.29777	1.77307	0.115622
0000008_11.tif	TU445	eud-1	13.401	16.061	5.56255	4.3527	-1.20985	0	0.29777	1.2961	-0.356905
0000008_11.tif	TU445	eud-1	10.745	16.2	5.56255	5.97898	0.416432	1	0.29777	1.78036	0.122848
0000008_11.tif	TU445	eud-1	11.019	16.217	5.56255	5.79848	0.235935	1	0.29777	1.72661	0.069601
0000008_11.tif	TU445	eud-1	13.491	16.314	5.56255	4.55749	-1.00506	0	0.29777	1.35708	-0.296491
0000008_11.tif	TU445	eud-1	11.123	16.379	5.56255	5.84693	0.284379	1	0.29777	1.74104	0.0838919
0000008_11.tif	TU445	eud-1	14.352	16.438	5.56255	4.46738	-1.09517	0	0.29777	1.33025	-0.323076
0000008_11.tif	TU445	eud-1	14.4	16.948	5.56255	4.96598	-0.596568	0	0.29777	1.47872	-0.175987
0000008_11.tif	TU445	eud-1	14.621	16.994	5.56255	4.98906	-0.573488	0	0.29777	1.48559	-0.169179
0000008_11.tif	TU445	eud-1	8.856	17.118	5.56255	7.99916	2.43662	1	0.29777	2.38191	0.718802
0000008_11.tif	TU445	eud-1	15.863	17.25	5.56255	5.29636	-0.266191	0	0.29777	1.5771	-0.0785264
0000008_11.tif	TU445	eud-1	8.87	17.305	5.56255	8.10897	2.54643	1	0.29777	2.41461	0.751195
0000008_11.tif	TU445	eud-1	18.94	17.353	5.56255	6.61731	1.05476	1	0.29777	1.97044	0.311154
0000008_11.tif	TU445	eud-1	15.906	17.353	5.56255	5.40495	-0.157602	0	0.29777	1.60943	-0.0464926
[truncated: 3,562 more rows]
