# Supplementary material for: Dopamine signaling regulates predator-driven changes in Caenorhabditis elegans’ egg laying behavior
Source: eLife. 2023 Jul 11;12:e83957. doi: 10.7554/eLife.83957 (PMC10335835; doi:10.7554/eLife.83957)
Supplement: Figure 1—source data 2. — Individual animal fluorescence data is tabulated with strain, predator condition, GFP intensity, dsRed intensity, the calculated GFP/dsRed ratio, the calculated log2 GFP/dsRed ratio, and the normalized log2 GFP/dsRed set relative to the average of the mock (control) condition. [file elife-83957-fig1-data2.xlsx]

## Sheet: Figure1E
Strain	Predator	GFP	dsRed	ratio	log2ratio	normalizer	norm_log2ratio
IV869	Control	5.333	27.451	0.194273	-2.36384	-2.07471	-0.289125
IV869	Control	7.355	32.002	0.229829	-2.12136	-2.07471	-0.0466499
IV869	Control	5.695	21.195	0.268695	-1.89596	-2.07471	0.178759
IV869	Control	6.413	33.721	0.190178	-2.39458	-2.07471	-0.319861
IV869	Control	5.724	27.738	0.20636	-2.27677	-2.07471	-0.202053
IV869	Control	6.396	27.354	0.233823	-2.09651	-2.07471	-0.021795
IV869	Control	5.862	25.187	0.232739	-2.10321	-2.07471	-0.0284995
IV869	Control	6.021	24.279	0.247992	-2.01163	-2.07471	0.0630809
IV869	Control	6.164	26.653	0.231269	-2.11236	-2.07471	-0.0376442
IV869	Control	6.412	18.524	0.346146	-1.53055	-2.07471	0.544166
IV869	Control	5.974	29.741	0.200867	-2.31568	-2.07471	-0.240969
IV869	Control	7.29	22.509	0.32387	-1.62651	-2.07471	0.448204
IV869	Control	7.561	33.641	0.224756	-2.15357	-2.07471	-0.0788567
IV869	Control	6.16	36.504	0.168749	-2.56705	-2.07471	-0.492337
IV869	Control	8.404	39.755	0.211395	-2.24199	-2.07471	-0.167273
IV869	Control	6.647	24.142	0.275329	-1.86077	-2.07471	0.213945
IV869	Control	6.147	28.623	0.214757	-2.21922	-2.07471	-0.144506
IV869	Control	6.662	32.652	0.20403	-2.29314	-2.07471	-0.218429
IV869	Control	6.262	26.534	0.235999	-2.08315	-2.07471	-0.00843184
IV869	Control	6.181	21.109	0.292813	-1.77195	-2.07471	0.302769
IV869	Control	6.709	17.426	0.384999	-1.37707	-2.07471	0.697643
IV869	Control	6.212	28.357	0.219064	-2.19058	-2.07471	-0.11586
IV869	Control	5.788	23.013	0.25151	-1.99131	-2.07471	0.0834027
IV869	Control	6.014	33.57	0.179148	-2.48078	-2.07471	-0.406061
IV869	Control	6.256	24.276	0.257703	-1.95622	-2.07471	0.118497
IV869	Control	5.729	28.389	0.201804	-2.30898	-2.07471	-0.234262
IV869	Control	6.15	22.332	0.27539	-1.86045	-2.07471	0.214261
IV869	Control	6.522	27.396	0.238064	-2.07058	-2.07471	0.00413601
IV869	Control	6.507	21.444	0.303442	-1.72051	-2.07471	0.354205
IV869	Control	6.465	13.868	0.466181	-1.10104	-2.07471	0.973677
IV869	Control	7.115	25.049	0.284043	-1.81582	-2.07471	0.258898
IV869	Control	5.506	26.448	0.208182	-2.26408	-2.07471	-0.189367
IV869	Control	5.286	28.677	0.184329	-2.43965	-2.07471	-0.364931
IV869	Control	5.929	28.302	0.20949	-2.25504	-2.07471	-0.180328
IV869	Control	5.245	20.388	0.257259	-1.95871	-2.07471	0.116009
IV869	Control	5.2	29.812	0.174426	-2.51931	-2.07471	-0.444595
IV869	Control	5.463	26.624	0.205191	-2.28496	-2.07471	-0.210247
IV869	Control	5.402	34.254	0.157704	-2.66471	-2.07471	-0.589992
IV869	Control	5.922	30.447	0.194502	-2.36214	-2.07471	-0.287429
IV869	Control	5.733	36.993	0.154975	-2.68989	-2.07471	-0.615175
IV869	Control	5.74	29.373	0.195418	-2.35537	-2.07471	-0.280653
IV869	Control	5.985	27.007	0.221609	-2.17391	-2.07471	-0.0991953
IV869	Control	6.046	29.348	0.206011	-2.27921	-2.07471	-0.204494
IV869	Control	7.474	32.165	0.232364	-2.10554	-2.07471	-0.0308243
IV869	Control	7.571	31.053	0.243809	-2.03618	-2.07471	0.038538
IV869	Control	7.484	29.202	0.256284	-1.96419	-2.07471	0.110529
IV869	Control	7.65	30.273	0.2527	-1.9845	-2.07471	0.0902149
IV869	Control	7.392	30.206	0.24472	-2.0308	-2.07471	0.0439164
IV869	Control	7.416	29.373	0.252477	-1.98578	-2.07471	0.0889375
IV869	Control	7.346	30.268	0.242699	-2.04276	-2.07471	0.0319524
IV869	Control	7.543	22.832	0.33037	-1.59785	-2.07471	0.476868
IV869	Control	7.866	29.396	0.267587	-1.90192	-2.07471	0.172797
IV869	Control	7.59	23.329	0.325346	-1.61995	-2.07471	0.454762
IV869	Control	6.973	24.105	0.289276	-1.78948	-2.07471	0.285234
IV869	Control	7.702	29.145	0.264265	-1.91994	-2.07471	0.154772
IV869	Control	5.95	27.118	0.219411	-2.18829	-2.07471	-0.113574
IV869	Control	6.503	26.695	0.243604	-2.03739	-2.07471	0.0373227
IV869	Control	6.427	25.429	0.252743	-1.98426	-2.07471	0.0904576
IV869	Control	6.652	31.785	0.209281	-2.25649	-2.07471	-0.181771
IV869	Control	7.539	25.23	0.298811	-1.7427	-2.07471	0.33202
IV869	Control	6.834	27.419	0.249243	-2.00437	-2.07471	0.0703411
IV869	Control	7.323	36.873	0.198601	-2.33206	-2.07471	-0.257343
IV869	Control	7.296	34.608	0.210818	-2.24593	-2.07471	-0.171213
IV869	Control	8.241	22.652	0.363809	-1.45875	-2.07471	0.615968
IV869	Control	7.308	35.182	0.20772	-2.26729	-2.07471	-0.192574
IV869	Control	7.109	30.576	0.232503	-2.10468	-2.07471	-0.0299662
IV869	Control	7.988	31.704	0.251956	-1.98876	-2.07471	0.0859563
IV869	Control	6.32	34.186	0.184871	-2.43541	-2.07471	-0.360694
IV869	Control	6.683	27.085	0.246742	-2.01893	-2.07471	0.0557886
IV869	Control	6.96	35.255	0.197419	-2.34067	-2.07471	-0.265954
IV869	Control	6.647	31.002	0.214406	-2.22159	-2.07471	-0.146871
IV869	Control	7.057	30.344	0.232567	-2.10428	-2.07471	-0.0295694
IV869	Control	6.78	25.632	0.264513	-1.91859	-2.07471	0.156126
IV869	Control	7.955	33.63	0.236545	-2.07981	-2.07471	-0.00510002
IV869	Control	8.765	32.212	0.272104	-1.87777	-2.07471	0.196943
IV869	Control	8.325	29.927	0.278177	-1.84593	-2.07471	0.228789
IV869	Control	8.278	35.75	0.231552	-2.11059	-2.07471	-0.0358742
IV869	Control	7.434	34.892	0.213057	-2.23069	-2.07471	-0.155971
IV869	Control	7.093	27.755	0.255558	-1.96828	-2.07471	0.106435
JU1051F	JU1051F	7.651	29.039	0.263473	-1.92427	-2.07471	0.150443
JU1051F	JU1051F	6.815	23.751	0.286935	-1.8012	-2.07471	0.273512
JU1051F	JU1051F	6.247	33.487	0.18655	-2.42237	-2.07471	-0.347651
JU1051F	JU1051F	7.55	34.214	0.22067	-2.18004	-2.07471	-0.105323
JU1051F	JU1051F	6.308	20.287	0.310938	-1.6853	-2.07471	0.389414
JU1051F	JU1051F	5.904	16.185	0.364782	-1.45489	-2.07471	0.619822
JU1051F	JU1051F	7.818	46.064	0.16972	-2.55877	-2.07471	-0.484053
JU1051F	JU1051F	6.344	38.16	0.166247	-2.5886	-2.07471	-0.513882
JU1051F	JU1051F	6.506	36.63	0.177614	-2.49318	-2.07471	-0.418468
JU1051F	JU1051F	6.893	27.602	0.249728	-2.00157	-2.07471	0.073146
JU1051F	JU1051F	6.041	28.583	0.211349	-2.2423	-2.07471	-0.167583
JU1051F	JU1051F	6.49	25.993	0.249683	-2.00183	-2.07471	0.0728822
JU1051F	JU1051F	7.853	27.197	0.288745	-1.79213	-2.07471	0.282583
JU1051F	JU1051F	6.937	24.549	0.282578	-1.82328	-2.07471	0.251434
JU1051F	JU1051F	7.77	29.571	0.262757	-1.9282	-2.07471	0.146518
JU1051F	JU1051F	6.22	25.655	0.242448	-2.04425	-2.07471	0.0304614
JU1051F	JU1051F	5.954	37.133	0.160343	-2.64077	-2.07471	-0.566056
JU1051F	JU1051F	6.762	31.285	0.216142	-2.20995	-2.07471	-0.135234
JU1051F	JU1051F	6.043	30.517	0.198021	-2.33628	-2.07471	-0.261561
JU1051F	JU1051F	5.356	34.091	0.157109	-2.67016	-2.07471	-0.595448
JU1051F	JU1051F	5.441	33.212	0.163826	-2.60976	-2.07471	-0.535046
JU1051F	JU1051F	5.309	1.95	2.72256	1.44497	-2.07471	3.51968
JU1051F	JU1051F	8.321	23.248	0.357923	-1.48228	-2.07471	0.592437
JU1051F	JU1051F	8.549	28.63	0.298603	-1.7437	-2.07471	0.331015
JU1051F	JU1051F	8.225	26.583	0.309408	-1.69242	-2.07471	0.382299
JU1051F	JU1051F	6.884	19.918	0.345617	-1.53275	-2.07471	0.541961
JU1051F	JU1051F	7.714	29.917	0.257847	-1.95541	-2.07471	0.1193
JU1051F	JU1051F	7.996	29.691	0.269307	-1.89268	-2.07471	0.18204
JU1051F	JU1051F	8.463	36.15	0.234108	-2.09475	-2.07471	-0.0200397
JU1051F	JU1051F	8.515	37.293	0.228327	-2.13083	-2.07471	-0.0561115
JU1051F	JU1051F	6.933	30.738	0.225551	-2.14847	-2.07471	-0.0737567
JU1051F	JU1051F	7.374	37.997	0.194068	-2.36537	-2.07471	-0.290651
JU1051F	JU1051F	8.487	35.326	0.240248	-2.0574	-2.07471	0.0173111
JU1051F	JU1051F	7.354	35.465	0.207359	-2.26979	-2.07471	-0.19508
JU1051F	JU1051F	8.321	41.653	0.19977	-2.32359	-2.07471	-0.248877
JU1051F	JU1051F	8.4	36.158	0.232314	-2.10585	-2.07471	-0.0311387
JU1051F	JU1051F	7.607	44.973	0.169146	-2.56366	-2.07471	-0.488945
JU1051F	JU1051F	7.804	34.607	0.225504	-2.14878	-2.07471	-0.0740633
JU1051F	JU1051F	38.262	29.123	1.31381	0.393753	-2.07471	2.46847
JU1051F	JU1051F	8.871	32.283	0.274789	-1.86361	-2.07471	0.211109
JU1051F	JU1051F	8.844	45.713	0.193468	-2.36983	-2.07471	-0.295119
JU1051F	JU1051F	8.741	38.638	0.226228	-2.14415	-2.07471	-0.0694353
JU1051F	JU1051F	8.322	30.671	0.271331	-1.88187	-2.07471	0.192842
JU1051F	JU1051F	9.617	34.619	0.277795	-1.84791	-2.07471	0.22681
JU1051F	JU1051F	9.606	29.144	0.329605	-1.60119	-2.07471	0.473524
JU1051F	JU1051F	8.057	30.155	0.267186	-1.90408	-2.07471	0.170632
JU1051F	JU1051F	9.811	35.094	0.279563	-1.83875	-2.07471	0.235963
JU1051F	JU1051F	8.723	36.063	0.241882	-2.04762	-2.07471	0.0270918
JU1051F	JU1051F	23.669	40.726	0.581177	-0.782951	-2.07471	1.29176
JU1051M	JU1051M	6.198	34.85	0.177848	-2.49128	-2.07471	-0.416569
JU1051M	JU1051M	5.93	28.318	0.209407	-2.25562	-2.07471	-0.1809
JU1051M	JU1051M	5.959	22.524	0.264562	-1.91832	-2.07471	0.156394
JU1051M	JU1051M	6.198	22.802	0.271818	-1.87929	-2.07471	0.195429
JU1051M	JU1051M	6.407	24.29	0.263771	-1.92264	-2.07471	0.152073
JU1051M	JU1051M	8.371	33.631	0.248907	-2.00632	-2.07471	0.0683951
JU1051M	JU1051M	6.93	31.331	0.221187	-2.17666	-2.07471	-0.101949
JU1051M	JU1051M	7.168	26.975	0.265728	-1.91198	-2.07471	0.162735
JU1051M	JU1051M	6.767	35.087	0.192863	-2.37435	-2.07471	-0.299633
JU1051M	JU1051M	6.418	44.076	0.145612	-2.7798	-2.07471	-0.705083
JU1051M	JU1051M	6.319	41.173	0.153474	-2.70393	-2.07471	-0.629215
JU1051M	JU1051M	7.41	39.412	0.188014	-2.41109	-2.07471	-0.336375
JU1051M	JU1051M	6.07	32.829	0.184897	-2.4352	-2.07471	-0.360487
JU1051M	JU1051M	7.057	25.642	0.275213	-1.86138	-2.07471	0.213333
JU1051M	JU1051M	7.288	25.515	0.285636	-1.80775	-2.07471	0.266964
JU1051M	JU1051M	6.083	29.739	0.204546	-2.2895	-2.07471	-0.214786
JU1051M	JU1051M	6.615	33.699	0.196297	-2.34889	-2.07471	-0.274178
JU1051M	JU1051M	7.227	27.996	0.258144	-1.95375	-2.07471	0.120963
JU1051M	JU1051M	5.958	25.283	0.235652	-2.08527	-2.07471	-0.0105527
JU1051M	JU1051M	6.231	30.667	0.203183	-2.29915	-2.07471	-0.224436
JU1051M	JU1051M	6.274	31.133	0.201523	-2.31099	-2.07471	-0.236272
JU1051M	JU1051M	7.966	28.943	0.275231	-1.86129	-2.07471	0.213428
JU1051M	JU1051M	8.049	31.897	0.252343	-1.98654	-2.07471	0.0881756
JU1051M	JU1051M	9.145	25.525	0.358276	-1.48086	-2.07471	0.593859
JU1051M	JU1051M	7.851	35.602	0.220521	-2.18101	-2.07471	-0.106295
JU1051M	JU1051M	7.382	39.741	0.185753	-2.42854	-2.07471	-0.35383
JU1051M	JU1051M	9.178	30.05	0.305424	-1.71111	-2.07471	0.363602
JU1051M	JU1051M	8.541	36.795	0.232124	-2.10703	-2.07471	-0.0323179
JU1051M	JU1051M	8.502	38.045	0.223472	-2.16183	-2.07471	-0.0871178
JU1051M	JU1051M	7.602	18.601	0.408688	-1.29093	-2.07471	0.783786
JU1051M	JU1051M	7.98	33.929	0.235197	-2.08806	-2.07471	-0.0133433
JU1051M	JU1051M	10.006	33.536	0.298366	-1.74485	-2.07471	0.32987
JU1051M	JU1051M	8.744	33.014	0.264857	-1.91671	-2.07471	0.158002
JU1051M	JU1051M	8.27	33.442	0.247294	-2.0157	-2.07471	0.059013
JU1051M	JU1051M	8.541	35.528	0.240402	-2.05648	-2.07471	0.0182353
JU1051M	JU1051M	8.816	32.512	0.271161	-1.88278	-2.07471	0.191939
JU1051M	JU1051M	9.919	32.634	0.303947	-1.71811	-2.07471	0.356606
JU1051M	JU1051M	8.933	40.483	0.220661	-2.1801	-2.07471	-0.105385
JU1051M	JU1051M	9.901	31.72	0.312137	-1.67975	-2.07471	0.394968
JU1051M	JU1051M	8.927	29.113	0.306633	-1.70542	-2.07471	0.369299
JU1051M	JU1051M	8.857	20.869	0.424409	-1.23647	-2.07471	0.838243
JU1051M	JU1051M	9.504	45.959	0.206793	-2.27374	-2.07471	-0.199026
JU1051M	JU1051M	10.522	35.591	0.295637	-1.7581	-2.07471	0.316611
JU1051M	JU1051M	8.463	42.597	0.198676	-2.33151	-2.07471	-0.256796
PS312	PS312	16.488	22.36	0.737388	-0.439504	-2.07471	1.63521
PS312	PS312	24.098	25.776	0.934901	-0.097115	-2.07471	1.9776
PS312	PS312	30.533	28.612	1.06714	0.093749	-2.07471	2.16846
PS312	PS312	32.996	25.165	1.31119	0.390873	-2.07471	2.46559
PS312	PS312	32.184	26.064	1.23481	0.304285	-2.07471	2.379
PS312	PS312	21.781	14.92	1.45985	0.545823	-2.07471	2.62054
PS312	PS312	43.499	37.333	1.16516	0.220531	-2.07471	2.29525
PS312	PS312	37.601	35.486	1.0596	0.0835211	-2.07471	2.15824
PS312	PS312	24.762	20.936	1.18275	0.242142	-2.07471	2.31686
PS312	PS312	40.556	30.018	1.35106	0.434088	-2.07471	2.5088
PS312	PS312	36.389	33.303	1.09266	0.12785	-2.07471	2.20257
PS312	PS312	17.678	33.117	0.533804	-0.905617	-2.07471	1.1691
PS312	PS312	38.14	28.75	1.32661	0.407743	-2.07471	2.48246
PS312	PS312	35.276	28.392	1.24246	0.313203	-2.07471	2.38792
PS312	PS312	24.875	35.962	0.691702	-0.531777	-2.07471	1.54294
PS312	PS312	13.189	35.504	0.371479	-1.42865	-2.07471	0.646069
PS312	PS312	10.915	40.882	0.266988	-1.90515	-2.07471	0.169561
PS312	PS312	11.202	34.163	0.327899	-1.60868	-2.07471	0.466037
PS312	PS312	31.871	21.551	1.47886	0.564489	-2.07471	2.6392
PS312	PS312	38.572	28.468	1.35492	0.438213	-2.07471	2.51293
PS312	PS312	32.692	22.007	1.48553	0.570975	-2.07471	2.64569
PS312	PS312	28.531	33.642	0.848077	-0.237733	-2.07471	1.83698
PS312	PS312	36.31	27.204	1.33473	0.416548	-2.07471	2.49126
PS312	PS312	46.438	35.346	1.31381	0.393759	-2.07471	2.46847
PS312	PS312	29.815	38.326	0.777931	-0.362285	-2.07471	1.71243
PS312	PS312	32.303	27.152	1.18971	0.25061	-2.07471	2.32532
PS312	PS312	30.56	32.961	0.927156	-0.109115	-2.07471	1.9656
PS312	PS312	38.581	36.446	1.05858	0.0821301	-2.07471	2.15684
PS312	PS312	37.279	32.576	1.14437	0.194554	-2.07471	2.26927
PS312	PS312	27.741	24.325	1.14043	0.18958	-2.07471	2.26429
PS312	PS312	36.697	30.99	1.18416	0.243859	-2.07471	2.31857
PS312	PS312	46.962	31.586	1.4868	0.572209	-2.07471	2.64692
PS312	PS312	38.121	34.784	1.09593	0.132162	-2.07471	2.20688
PS312	PS312	39.794	32.596	1.22082	0.287856	-2.07471	2.36257
TU445	eud-1	6.749	30.331	0.222512	-2.16805	-2.07471	-0.0933325
TU445	eud-1	5.701	30.773	0.18526	-2.43238	-2.07471	-0.357663
TU445	eud-1	5.984	21.288	0.281097	-1.83086	-2.07471	0.243857
TU445	eud-1	9.36	37.874	0.247135	-2.01663	-2.07471	0.0580876
TU445	eud-1	6.677	38.479	0.173523	-2.5268	-2.07471	-0.452084
TU445	eud-1	5.862	30.229	0.19392	-2.36647	-2.07471	-0.291753
TU445	eud-1	7.108	31.629	0.22473	-2.15373	-2.07471	-0.0790174
TU445	eud-1	6.496	27.435	0.236778	-2.07839	-2.07471	-0.00367911
TU445	eud-1	6.157	29.952	0.205562	-2.28235	-2.07471	-0.207638
TU445	eud-1	6.795	40.03	0.169748	-2.55854	-2.07471	-0.483821
TU445	eud-1	7.224	31.724	0.227714	-2.1347	-2.07471	-0.05999
TU445	eud-1	6.997	36.588	0.191238	-2.38656	-2.07471	-0.311847
TU445	eud-1	7.163	35.931	0.199354	-2.32659	-2.07471	-0.251878
TU445	eud-1	6.253	34.368	0.181943	-2.45845	-2.07471	-0.383731
TU445	eud-1	6.105	29.839	0.204598	-2.28914	-2.07471	-0.214421
TU445	eud-1	5.935	32.72	0.181388	-2.46285	-2.07471	-0.388138
TU445	eud-1	7.237	38.026	0.190317	-2.39352	-2.07471	-0.318808
TU445	eud-1	6.245	38.273	0.16317	-2.61555	-2.07471	-0.540839
TU445	eud-1	5.875	33.012	0.177966	-2.49033	-2.07471	-0.415615
TU445	eud-1	6.496	33.576	0.193472	-2.36981	-2.07471	-0.295092
TU445	eud-1	6.116	36.393	0.168054	-2.573	-2.07471	-0.498286
TU445	eud-1	9.301	29.864	0.311445	-1.68295	-2.07471	0.391765
TU445	eud-1	8.548	31.695	0.269696	-1.8906	-2.07471	0.184118
TU445	eud-1	8.124	25.709	0.315998	-1.66201	-2.07471	0.412704
TU445	eud-1	7.624	24.422	0.312178	-1.67956	-2.07471	0.395154
TU445	eud-1	7.989	34.775	0.229734	-2.12196	-2.07471	-0.0472488
TU445	eud-1	8.66	35.326	0.245145	-2.02829	-2.07471	0.0464235
TU445	eud-1	6.992	41.297	0.16931	-2.56226	-2.07471	-0.487545
TU445	eud-1	7.967	23.184	0.343642	-1.54102	-2.07471	0.533694
TU445	eud-1	8.583	25.538	0.336087	-1.57309	-2.07471	0.501623
TU445	eud-1	8.494	28.288	0.300269	-1.73567	-2.07471	0.339041
TU445	eud-1	8.999	34.149	0.263522	-1.92401	-2.07471	0.150708
TU445	eud-1	9.097	33.845	0.268784	-1.89548	-2.07471	0.179235
TU445	eud-1	7.71	32.636	0.236242	-2.08166	-2.07471	-0.00694656
TU445	eud-1	7.459	33.033	0.225804	-2.14685	-2.07471	-0.0721389
TU445	eud-1	8.012	33.834	0.236803	-2.07824	-2.07471	-0.0035245
TU445	eud-1	7.136	41.247	0.173007	-2.5311	-2.07471	-0.456387
TU445	eud-1	7.148	31.215	0.228992	-2.12663	-2.07471	-0.051913
TU445	eud-1	7.474	39.897	0.187332	-2.41633	-2.07471	-0.341613
TU445	eud-1	8.807	34.662	0.254082	-1.97663	-2.07471	0.0980826
TU445	eud-1	9.373	29.323	0.319647	-1.64545	-2.07471	0.429265
TU445	eud-1	9.039	33.495	0.269861	-1.88971	-2.07471	0.185004
TU445	eud-1	8.593	30.955	0.277597	-1.84894	-2.07471	0.225776
TU445	eud-1	8.873	29.13	0.3046	-1.71501	-2.07471	0.359703
TU445	eud-1	7.706	23.553	0.327177	-1.61186	-2.07471	0.462858
TU445	eud-1	7.63	29.346	0.260001	-1.94341	-2.07471	0.131306
TU445	eud-1	11.138	30.294	0.367664	-1.44354	-2.07471	0.631173
