# Supplementary material for: Dopamine signaling regulates predator-driven changes in Caenorhabditis elegans’ egg laying behavior
Source: eLife. 2023 Jul 11;12:e83957. doi: 10.7554/eLife.83957 (PMC10335835; doi:10.7554/eLife.83957)
Supplement: Figure 2—source data 1. — For each test arena, 20 hr (15 frames/hr, tresolution = 4 min) of tracking data are tabulated, showing frame number, time (in hr), arena, condition, number of worms tracked per time point, lawn radius (in pixels), distance of body midpoint to center of arena (in pixels), distance of body midpoint to edge of lawn (in pixels), position as 1 (off) or 0 (on) lawn, the conversion factor for pixel data in mm-per-pixel, the calculated distance from center in mm, the calculated distance from the lawn edge in mm. [file elife-83957-fig2-data1.xlsx]

## Sheet: Figure2B
Frame	t	PlateID	Condition	N_worms	Lawn_Radius	DistCenterPx	DistEdgePx	off	PxScale	DistCenterMm	DistEdgeMm
1	0	220525Well 1	control	4	124.522	179.711	55.1888	1	0.00976923	1.75564	0.539152
2	0.0666667	220525Well 1	control	5	124.522	137.534	13.0117	1	0.00976923	1.3436	0.127115
3	0.133333	220525Well 1	control	5	124.522	136.935	12.4124	1	0.00976923	1.33775	0.121259
4	0.2	220525Well 1	control	6	124.522	133.279	8.75641	1	0.00976923	1.30203	0.0855434
5	0.266667	220525Well 1	control	5	124.522	131.999	7.47685	1	0.00976923	1.28953	0.073043
6	0.333333	220525Well 1	control	4	124.522	105.261	-19.261	0	0.00976923	1.02832	-0.188165
7	0.4	220525Well 1	control	5	124.522	100.26	-24.2626	0	0.00976923	0.979461	-0.237027
8	0.466667	220525Well 1	control	7	124.522	124.086	-0.436435	0	0.00976923	1.21222	-0.00426363
9	0.533333	220525Well 1	control	6	124.522	129.198	4.67528	1	0.00976923	1.26216	0.0456739
10	0.6	220525Well 1	control	5	124.522	100.78	-23.7426	0	0.00976923	0.984542	-0.231947
11	0.666667	220525Well 1	control	5	124.522	96.663	-27.8594	0	0.00976923	0.944324	-0.272165
12	0.733333	220525Well 1	control	5	124.522	96.9405	-27.5819	0	0.00976923	0.947034	-0.269454
13	0.8	220525Well 1	control	4	124.522	92.7954	-31.7271	0	0.00976923	0.906539	-0.309949
14	0.866667	220525Well 1	control	5	124.522	135.97	11.4478	1	0.00976923	1.32832	0.111836
15	0.933333	220525Well 1	control	4	124.522	107.167	-17.3549	0	0.00976923	1.04694	-0.169544
16	1	220525Well 1	control	5	124.522	105.153	-19.3694	0	0.00976923	1.02726	-0.189224
17	1.06667	220525Well 1	control	3	124.522	104.277	-20.2449	0	0.00976923	1.01871	-0.197777
18	1.13333	220525Well 1	control	4	124.522	105.3	-19.2221	0	0.00976923	1.0287	-0.187785
19	1.2	220525Well 1	control	5	124.522	136.258	11.7356	1	0.00976923	1.33114	0.114647
20	1.26667	220525Well 1	control	3	124.522	94.884	-29.6384	0	0.00976923	0.926943	-0.289545
21	1.33333	220525Well 1	control	3	124.522	93.8644	-30.658	0	0.00976923	0.916983	-0.299505
22	1.4	220525Well 1	control	6	124.522	123.444	-1.07813	0	0.00976923	1.20596	-0.0105325
23	1.46667	220525Well 1	control	6	124.522	124.521	-0.00139536	0	0.00976923	1.21647	-1.36316e-05
24	1.53333	220525Well 1	control	7	124.522	124.267	-0.25513	0	0.00976923	1.214	-0.00249242
25	1.6	220525Well 1	control	6	124.522	126.914	2.39162	1	0.00976923	1.23985	0.0233643
26	1.66667	220525Well 1	control	5	124.522	95.1581	-29.3643	0	0.00976923	0.929621	-0.286867
27	1.73333	220525Well 1	control	5	124.522	106.301	-18.2217	0	0.00976923	1.03848	-0.178012
28	1.8	220525Well 1	control	5	124.522	89.3157	-35.2067	0	0.00976923	0.872546	-0.343942
29	1.86667	220525Well 1	control	6	124.522	89.5165	-35.0059	0	0.00976923	0.874507	-0.341981
30	1.93333	220525Well 1	control	6	124.522	130.727	6.20493	1	0.00976923	1.27711	0.0606174
31	2	220525Well 1	control	5	124.522	100.717	-23.8055	0	0.00976923	0.983927	-0.232561
32	2.06667	220525Well 1	control	4	124.522	96.9385	-27.5839	0	0.00976923	0.947015	-0.269474
33	2.13333	220525Well 1	control	6	124.522	99.268	-25.2544	0	0.00976923	0.969772	-0.246716
34	2.2	220525Well 1	control	4	124.522	83.5842	-40.9382	0	0.00976923	0.816553	-0.399935
35	2.26667	220525Well 1	control	5	124.522	140.804	16.2814	1	0.00976923	1.37555	0.159057
36	2.33333	220525Well 1	control	5	124.522	99.9554	-24.567	0	0.00976923	0.976488	-0.24
37	2.4	220525Well 1	control	6	124.522	126.617	2.09446	1	0.00976923	1.23695	0.0204612
38	2.46667	220525Well 1	control	6	124.522	127.886	3.36361	1	0.00976923	1.24935	0.0328598
39	2.53333	220525Well 1	control	6	124.522	132.33	7.80718	1	0.00976923	1.29276	0.0762701
40	2.6	220525Well 1	control	5	124.522	101.46	-23.0623	0	0.00976923	0.991187	-0.225301
41	2.66667	220525Well 1	control	6	124.522	132.731	8.20828	1	0.00976923	1.29668	0.0801886
42	2.73333	220525Well 1	control	6	124.522	135.917	11.3944	1	0.00976923	1.3278	0.111314
43	2.8	220525Well 1	control	6	124.522	135.245	10.7222	1	0.00976923	1.32124	0.104748
44	2.86667	220525Well 1	control	6	124.522	134.325	9.8027	1	0.00976923	1.31225	0.0957648
45	2.93333	220525Well 1	control	7	124.522	138.196	13.6739	1	0.00976923	1.35007	0.133583
46	3	220525Well 1	control	6	124.522	108.149	-16.3731	0	0.00976923	1.05654	-0.159952
47	3.06667	220525Well 1	control	7	124.522	129.45	4.92743	1	0.00976923	1.26463	0.0481372
48	3.13333	220525Well 1	control	6	124.522	104.816	-19.7067	0	0.00976923	1.02397	-0.192519
49	3.2	220525Well 1	control	7	124.522	127.359	2.83617	1	0.00976923	1.2442	0.0277072
50	3.26667	220525Well 1	control	6	124.522	102.6	-21.9229	0	0.00976923	1.00232	-0.21417
51	3.33333	220525Well 1	control	6	124.522	102.088	-22.4343	0	0.00976923	0.997322	-0.219166
52	3.4	220525Well 1	control	7	124.522	124.439	-0.0829891	0	0.00976923	1.21568	-0.00081074
53	3.46667	220525Well 1	control	6	124.522	97.5617	-26.9607	0	0.00976923	0.953103	-0.263385
54	3.53333	220525Well 1	control	8	124.522	99.8588	-24.6636	0	0.00976923	0.975544	-0.240944
55	3.6	220525Well 1	control	8	124.522	116.146	-8.37682	0	0.00976923	1.13465	-0.0818351
56	3.66667	220525Well 1	control	7	124.522	122.247	-2.27558	0	0.00976923	1.19426	-0.0222306
57	3.73333	220525Well 1	control	6	124.522	94.8744	-29.648	0	0.00976923	0.92685	-0.289638
58	3.8	220525Well 1	control	6	124.522	130.079	5.55617	1	0.00976923	1.27077	0.0542795
59	3.86667	220525Well 1	control	5	124.522	99.615	-24.9075	0	0.00976923	0.973161	-0.243327
60	3.93333	220525Well 1	control	6	124.522	97.4289	-27.0935	0	0.00976923	0.951806	-0.264682
61	4	220525Well 1	control	6	124.522	101.43	-23.0926	0	0.00976923	0.990891	-0.225597
62	4.06667	220525Well 1	control	6	124.522	128.485	3.96257	1	0.00976923	1.2552	0.0387113
63	4.13333	220525Well 1	control	5	124.522	101.362	-23.1602	0	0.00976923	0.990231	-0.226257
64	4.2	220525Well 1	control	6	124.522	103.283	-21.2398	0	0.00976923	1.00899	-0.207496
65	4.26667	220525Well 1	control	6	124.522	110.357	-14.1654	0	0.00976923	1.0781	-0.138385
66	4.33333	220525Well 1	control	6	124.522	105.133	-19.3894	0	0.00976923	1.02707	-0.18942
67	4.4	220525Well 1	control	6	124.522	132.441	7.91889	1	0.00976923	1.29385	0.0773614
68	4.46667	220525Well 1	control	6	124.522	103.504	-21.0186	0	0.00976923	1.01115	-0.205336
69	4.53333	220525Well 1	control	6	124.522	98.3815	-26.1409	0	0.00976923	0.961112	-0.255376
70	4.6	220525Well 1	control	6	124.522	97.1765	-27.3459	0	0.00976923	0.94934	-0.267148
71	4.66667	220525Well 1	control	7	124.522	124.898	0.375241	1	0.00976923	1.22015	0.00366582
72	4.73333	220525Well 1	control	7	124.522	99.731	-24.7914	0	0.00976923	0.974295	-0.242193
73	4.8	220525Well 1	control	5	124.522	93.7054	-30.817	0	0.00976923	0.915429	-0.301059
74	4.86667	220525Well 1	control	6	124.522	93.3171	-31.2053	0	0.00976923	0.911636	-0.304852
75	4.93333	220525Well 1	control	7	124.522	101.995	-22.5275	0	0.00976923	0.996412	-0.220076
76	5	220525Well 1	control	5	124.522	99.758	-24.7644	0	0.00976923	0.974559	-0.241929
77	5.06667	220525Well 1	control	5	124.522	112.99	-11.5322	0	0.00976923	1.10383	-0.112661
78	5.13333	220525Well 1	control	6	124.522	101.342	-23.1807	0	0.00976923	0.99003	-0.226458
79	5.2	220525Well 1	control	6	124.522	105.44	-19.0825	0	0.00976923	1.03007	-0.186421
80	5.26667	220525Well 1	control	6	124.522	101.91	-22.6121	0	0.00976923	0.995585	-0.220903
81	5.33333	220525Well 1	control	6	124.522	102.819	-21.7038	0	0.00976923	1.00446	-0.212029
82	5.4	220525Well 1	control	6	124.522	98.545	-25.9774	0	0.00976923	0.962709	-0.25378
83	5.46667	220525Well 1	control	7	124.522	125.748	1.22547	1	0.00976923	1.22846	0.0119719
84	5.53333	220525Well 1	control	6	124.522	101.768	-22.7545	0	0.00976923	0.994194	-0.222294
85	5.6	220525Well 1	control	5	124.522	100.034	-24.4888	0	0.00976923	0.977252	-0.239236
86	5.66667	220525Well 1	control	7	124.522	116.75	-7.77289	0	0.00976923	1.14055	-0.0759352
87	5.73333	220525Well 1	control	7	124.522	123.421	-1.10162	0	0.00976923	1.20573	-0.010762
88	5.8	220525Well 1	control	6	124.522	114.917	-9.60542	0	0.00976923	1.12265	-0.0938376
89	5.86667	220525Well 1	control	8	124.522	83.8414	-40.681	0	0.00976923	0.819066	-0.397422
90	5.93333	220525Well 1	control	5	124.522	76.2553	-48.2671	0	0.00976923	0.744956	-0.471532
91	6	220525Well 1	control	7	124.522	107.528	-16.994	0	0.00976923	1.05047	-0.166019
92	6.06667	220525Well 1	control	6	124.522	97.302	-27.2204	0	0.00976923	0.950566	-0.265922
93	6.13333	220525Well 1	control	8	124.522	91.8838	-32.6386	0	0.00976923	0.897635	-0.318854
94	6.2	220525Well 1	control	6	124.522	71.09	-53.4324	0	0.00976923	0.694494	-0.521994
95	6.26667	220525Well 1	control	7	124.522	72.2392	-52.2832	0	0.00976923	0.705721	-0.510767
96	6.33333	220525Well 1	control	7	124.522	66.5455	-57.9769	0	0.00976923	0.650098	-0.56639
97	6.4	220525Well 1	control	6	124.522	68.639	-55.8834	0	0.00976923	0.67055	-0.545938
98	6.46667	220525Well 1	control	5	124.522	71.2926	-53.2298	0	0.00976923	0.696474	-0.520014
99	6.53333	220525Well 1	control	6	124.522	60.7083	-63.8141	0	0.00976923	0.593074	-0.623415
100	6.6	220525Well 1	control	7	124.522	91.8311	-32.6913	0	0.00976923	0.897119	-0.319369
101	6.66667	220525Well 1	control	7	124.522	92.6934	-31.829	0	0.00976923	0.905543	-0.310945
102	6.73333	220525Well 1	control	8	124.522	55.1441	-69.3783	0	0.00976923	0.538715	-0.677773
103	6.8	220525Well 1	control	6	124.522	64.2014	-60.321	0	0.00976923	0.627198	-0.58929
104	6.86667	220525Well 1	control	6	124.522	64.4109	-60.1115	0	0.00976923	0.629245	-0.587243
105	6.93333	220525Well 1	control	7	124.522	95.4786	-29.0438	0	0.00976923	0.932752	-0.283736
106	7	220525Well 1	control	7	124.522	92.5866	-31.9358	0	0.00976923	0.9045	-0.311988
107	7.06667	220525Well 1	control	7	124.522	86.3998	-38.1226	0	0.00976923	0.84406	-0.372428
108	7.13333	220525Well 1	control	7	124.522	88.2948	-36.2276	0	0.00976923	0.862572	-0.353916
109	7.2	220525Well 1	control	5	124.522	60.9903	-63.5322	0	0.00976923	0.595828	-0.62066
110	7.26667	220525Well 1	control	5	124.522	60.7827	-63.7397	0	0.00976923	0.5938	-0.622688
111	7.33333	220525Well 1	control	6	124.522	97.426	-27.0964	0	0.00976923	0.951777	-0.264711
112	7.4	220525Well 1	control	8	124.522	45.7122	-78.8102	0	0.00976923	0.446573	-0.769915
113	7.46667	220525Well 1	control	6	124.522	86.7406	-37.7818	0	0.00976923	0.847389	-0.369099
114	7.53333	220525Well 1	control	7	124.522	84.6109	-39.9115	0	0.00976923	0.826583	-0.389905
115	7.6	220525Well 1	control	6	124.522	52.8695	-71.6529	0	0.00976923	0.516494	-0.699994
116	7.66667	220525Well 1	control	6	124.522	55.9419	-68.5805	0	0.00976923	0.546509	-0.669979
117	7.73333	220525Well 1	control	6	124.522	53.7903	-70.7321	0	0.00976923	0.52549	-0.690999
118	7.8	220525Well 1	control	6	124.522	58.7809	-65.7415	0	0.00976923	0.574244	-0.642244
119	7.86667	220525Well 1	control	6	124.522	64.9408	-59.5816	0	0.00976923	0.634422	-0.582067
120	7.93333	220525Well 1	control	7	124.522	58.1084	-66.414	0	0.00976923	0.567674	-0.648814
121	8	220525Well 1	control	7	124.522	99.79	-24.7324	0	0.00976923	0.974871	-0.241617
122	8.06667	220525Well 1	control	10	124.522	90.5929	-33.9295	0	0.00976923	0.885023	-0.331465
123	8.13333	220525Well 1	control	7	124.522	100.254	-24.2683	0	0.00976923	0.979405	-0.237083
124	8.2	220525Well 1	control	6	124.522	97.4135	-27.1089	0	0.00976923	0.951655	-0.264833
125	8.26667	220525Well 1	control	6	124.522	50.2412	-74.2812	0	0.00976923	0.490818	-0.72567
126	8.33333	220525Well 1	control	8	124.522	80.294	-44.2284	0	0.00976923	0.784411	-0.432077
127	8.4	220525Well 1	control	8	124.522	61.0438	-63.4787	0	0.00976923	0.59635	-0.620138
128	8.46667	220525Well 1	control	7	124.522	65.6734	-58.849	0	0.00976923	0.641578	-0.57491
129	8.53333	220525Well 1	control	6	124.522	61.9328	-62.5896	0	0.00976923	0.605036	-0.611452
130	8.6	220525Well 1	control	6	124.522	65.5714	-58.951	0	0.00976923	0.640582	-0.575906
131	8.66667	220525Well 1	control	7	124.522	69.583	-54.9394	0	0.00976923	0.679772	-0.536716
132	8.73333	220525Well 1	control	8	124.522	113.144	-11.3784	0	0.00976923	1.10533	-0.111158
133	8.8	220525Well 1	control	6	124.522	72.9302	-51.5922	0	0.00976923	0.712472	-0.504016
134	8.86667	220525Well 1	control	6	124.522	59.2548	-65.2676	0	0.00976923	0.578874	-0.637614
135	8.93333	220525Well 1	control	6	124.522	65.8643	-58.6581	0	0.00976923	0.643444	-0.573044
136	9	220525Well 1	control	6	124.522	65.9634	-58.559	0	0.00976923	0.644411	-0.572077
137	9.06667	220525Well 1	control	7	124.522	67.7941	-56.7283	0	0.00976923	0.662296	-0.554192
138	9.13333	220525Well 1	control	7	124.522	104.116	-20.4063	0	0.00976923	1.01713	-0.199354
139	9.2	220525Well 1	control	6	124.522	71.3912	-53.1312	0	0.00976923	0.697437	-0.519051
140	9.26667	220525Well 1	control	7	124.522	76.8974	-47.625	0	0.00976923	0.751229	-0.465259
141	9.33333	220525Well 1	control	7	124.522	89.9876	-34.5348	0	0.00976923	0.879109	-0.337379
142	9.4	220525Well 1	control	6	124.522	86.4852	-38.0372	0	0.00976923	0.844894	-0.371595
143	9.46667	220525Well 1	control	10	124.522	92.661	-31.8615	0	0.00976923	0.905226	-0.311262
144	9.53333	220525Well 1	control	6	124.522	87.8601	-36.6623	0	0.00976923	0.858326	-0.358163
145	9.6	220525Well 1	control	7	124.522	110.751	-13.7719	0	0.00976923	1.08195	-0.13454
146	9.66667	220525Well 1	control	7	124.522	95.9324	-28.59	0	0.00976923	0.937185	-0.279303
147	9.73333	220525Well 1	control	6	124.522	87.1541	-37.3683	0	0.00976923	0.851428	-0.36506
148	9.8	220525Well 1	control	6	124.522	86.4322	-38.0902	0	0.00976923	0.844376	-0.372112
149	9.86667	220525Well 1	control	6	124.522	76.9305	-47.5919	0	0.00976923	0.751552	-0.464936
150	9.93333	220525Well 1	control	7	124.522	110.388	-14.1347	0	0.00976923	1.0784	-0.138085
151	10	220525Well 1	control	8	124.522	112.356	-12.1664	0	0.00976923	1.09763	-0.118857
152	10.0667	220525Well 1	control	6	124.522	86.5656	-37.9568	0	0.00976923	0.845679	-0.370809
153	10.1333	220525Well 1	control	6	124.522	79.7339	-44.7885	0	0.00976923	0.778939	-0.437549
154	10.2	220525Well 1	control	7	124.522	107.816	-16.7065	0	0.00976923	1.05328	-0.163209
155	10.2667	220525Well 1	control	6	124.522	87.5722	-36.9502	0	0.00976923	0.855513	-0.360975
156	10.3333	220525Well 1	control	6	124.522	95.9251	-28.5973	0	0.00976923	0.937114	-0.279374
157	10.4	220525Well 1	control	8	124.522	75.6929	-48.8295	0	0.00976923	0.739462	-0.477026
158	10.4667	220525Well 1	control	6	124.522	76.6198	-47.9026	0	0.00976923	0.748517	-0.467971
159	10.5333	220525Well 1	control	7	124.522	75.2952	-49.2272	0	0.00976923	0.735576	-0.480912
160	10.6	220525Well 1	control	8	124.522	63.8546	-60.6678	0	0.00976923	0.62381	-0.592678
161	10.6667	220525Well 1	control	6	124.522	86.4956	-38.0268	0	0.00976923	0.844995	-0.371493
162	10.7333	220525Well 1	control	7	124.522	105.924	-18.5981	0	0.00976923	1.0348	-0.18169
163	10.8	220525Well 1	control	6	124.522	85.457	-39.0654	0	0.00976923	0.834849	-0.381639
164	10.8667	220525Well 1	control	7	124.522	82.3785	-42.1439	0	0.00976923	0.804774	-0.411714
165	10.9333	220525Well 1	control	6	124.522	70.1774	-54.345	0	0.00976923	0.685579	-0.530909
166	11	220525Well 1	control	6	124.522	72.1039	-52.4185	0	0.00976923	0.7044	-0.512089
167	11.0667	220525Well 1	control	7	124.522	69.3702	-55.1522	0	0.00976923	0.677694	-0.538794
168	11.1333	220525Well 1	control	6	124.522	84.7645	-39.7579	0	0.00976923	0.828084	-0.388404
169	11.2	220525Well 1	control	6	124.522	79.771	-44.7514	0	0.00976923	0.779302	-0.437187
170	11.2667	220525Well 1	control	5	124.522	84.0915	-40.4309	0	0.00976923	0.821509	-0.394979
171	11.3333	220525Well 1	control	6	124.522	88.4304	-36.092	0	0.00976923	0.863897	-0.352591
172	11.4	220525Well 1	control	7	124.522	114.369	-10.1537	0	0.00976923	1.11729	-0.0991934
173	11.4667	220525Well 1	control	8	124.522	89.4158	-35.1066	0	0.00976923	0.873524	-0.342964
174	11.5333	220525Well 1	control	7	124.522	88.696	-35.8264	0	0.00976923	0.866492	-0.349996
175	11.6	220525Well 1	control	7	124.522	131.864	7.34208	1	0.00976923	1.28821	0.0717265
176	11.6667	220525Well 1	control	7	124.522	113.006	-11.516	0	0.00976923	1.10399	-0.112502
177	11.7333	220525Well 1	control	6	124.522	88.821	-35.7014	0	0.00976923	0.867713	-0.348775
178	11.8	220525Well 1	control	7	124.522	114.747	-9.77514	0	0.00976923	1.12099	-0.0954956
179	11.8667	220525Well 1	control	6	124.522	93.211	-31.3114	0	0.00976923	0.9106	-0.305888
180	11.9333	220525Well 1	control	6	124.522	95.2783	-29.2441	0	0.00976923	0.930796	-0.285692
181	12	220525Well 1	control	6	124.522	96.779	-27.7434	0	0.00976923	0.945456	-0.271032
182	12.0667	220525Well 1	control	7	124.522	90.3653	-34.1572	0	0.00976923	0.882799	-0.333689
183	12.1333	220525Well 1	control	7	124.522	113.699	-10.8233	0	0.00976923	1.11075	-0.105735
184	12.2	220525Well 1	control	7	124.522	112.824	-11.698	0	0.00976923	1.10221	-0.11428
185	12.2667	220525Well 1	control	6	124.522	92.6036	-31.9188	0	0.00976923	0.904666	-0.311822
186	12.3333	220525Well 1	control	7	124.522	103.199	-21.3229	0	0.00976923	1.00818	-0.208309
187	12.4	220525Well 1	control	6	124.522	80.378	-44.1444	0	0.00976923	0.785231	-0.431257
188	12.4667	220525Well 1	control	6	124.522	77.0946	-47.4278	0	0.00976923	0.753155	-0.463333
189	12.5333	220525Well 1	control	6	124.522	75.0786	-49.4438	0	0.00976923	0.73346	-0.483028
190	12.6	220525Well 1	control	6	124.522	75.0543	-49.4681	0	0.00976923	0.733223	-0.483265
191	12.6667	220525Well 1	control	6	124.522	72.5099	-52.0125	0	0.00976923	0.708366	-0.508122
192	12.7333	220525Well 1	control	6	124.522	76.7193	-47.8031	0	0.00976923	0.749488	-0.467
193	12.8	220525Well 1	control	5	124.522	72.9486	-51.5738	0	0.00976923	0.712652	-0.503836
194	12.8667	220525Well 1	control	7	124.522	66.2074	-58.315	0	0.00976923	0.646795	-0.569693
195	12.9333	220525Well 1	control	6	124.522	72.6235	-51.8989	0	0.00976923	0.709476	-0.507013
196	13	220525Well 1	control	6	124.522	76.0435	-48.4789	0	0.00976923	0.742887	-0.473602
197	13.0667	220525Well 1	control	6	124.522	71.016	-53.5064	0	0.00976923	0.693772	-0.522716
198	13.1333	220525Well 1	control	6	124.522	76.7323	-47.7902	0	0.00976923	0.749615	-0.466873
199	13.2	220525Well 1	control	6	124.522	78.2433	-46.2791	0	0.00976923	0.764377	-0.452111
200	13.2667	220525Well 1	control	6	124.522	93.5971	-30.9253	0	0.00976923	0.914372	-0.302116
201	13.3333	220525Well 1	control	8	124.522	113.021	-11.5013	0	0.00976923	1.10413	-0.112359
202	13.4	220525Well 1	control	6	124.522	84.5992	-39.9232	0	0.00976923	0.826469	-0.390019
203	13.4667	220525Well 1	control	7	124.522	84.6919	-39.8305	0	0.00976923	0.827375	-0.389114
204	13.5333	220525Well 1	control	8	124.522	107.644	-16.8789	0	0.00976923	1.05159	-0.164894
205	13.6	220525Well 1	control	6	124.522	100.172	-24.3501	0	0.00976923	0.978606	-0.237882
206	13.6667	220525Well 1	control	7	124.522	118.243	-6.2799	0	0.00976923	1.15514	-0.0613498
207	13.7333	220525Well 1	control	6	124.522	107.698	-16.824	0	0.00976923	1.05213	-0.164357
208	13.8	220525Well 1	control	7	124.522	91.4893	-33.0331	0	0.00976923	0.89378	-0.322708
209	13.8667	220525Well 1	control	8	124.522	78.9018	-45.6206	0	0.00976923	0.77081	-0.445678
210	13.9333	220525Well 1	control	7	124.522	107.922	-16.5999	0	0.00976923	1.05432	-0.162168
211	14	220525Well 1	control	7	124.522	116.027	-8.49578	0	0.00976923	1.13349	-0.0829972
212	14.0667	220525Well 1	control	5	124.522	81.4137	-43.1087	0	0.00976923	0.795349	-0.421139
213	14.1333	220525Well 1	control	6	124.522	96.1082	-28.4142	0	0.00976923	0.938903	-0.277585
214	14.2	220525Well 1	control	7	124.522	92.579	-31.9434	0	0.00976923	0.904426	-0.312062
215	14.2667	220525Well 1	control	7	124.522	102.044	-22.4783	0	0.00976923	0.996893	-0.219595
216	14.3333	220525Well 1	control	7	124.522	95.9157	-28.6067	0	0.00976923	0.937023	-0.279465
217	14.4	220525Well 1	control	8	124.522	128.019	3.49707	1	0.00976923	1.25065	0.0341637
218	14.4667	220525Well 1	control	6	124.522	143.899	19.3765	1	0.00976923	1.40578	0.189293
219	14.5333	220525Well 1	control	7	124.522	117.06	-7.46254	0	0.00976923	1.14358	-0.0729032
220	14.6	220525Well 1	control	6	124.522	131.298	6.77573	1	0.00976923	1.28268	0.0661937
221	14.6667	220525Well 1	control	7	124.522	99.1236	-25.3988	0	0.00976923	0.968361	-0.248127
222	14.7333	220525Well 1	control	6	124.522	108.982	-15.54	0	0.00976923	1.06467	-0.151813
223	14.8	220525Well 1	control	5	124.522	120.716	-3.80685	0	0.00976923	1.1793	-0.03719
224	14.8667	220525Well 1	control	7	124.522	139.513	14.9909	1	0.00976923	1.36294	0.146449
225	14.9333	220525Well 1	control	7	124.522	118.996	-5.52629	0	0.00976923	1.1625	-0.0539876
226	15	220525Well 1	control	7	124.522	93.9584	-30.564	0	0.00976923	0.917901	-0.298587
227	15.0667	220525Well 1	control	6	124.522	125.203	0.680737	1	0.00976923	1.22314	0.00665027
228	15.1333	220525Well 1	control	7	124.522	121.64	-2.88257	0	0.00976923	1.18833	-0.0281605
229	15.2	220525Well 1	control	7	124.522	141.351	16.8283	1	0.00976923	1.38089	0.164399
230	15.2667	220525Well 1	control	6	124.522	128.3	3.77789	1	0.00976923	1.2534	0.0369071
231	15.3333	220525Well 1	control	8	124.522	86.4505	-38.0719	0	0.00976923	0.844555	-0.371933
232	15.4	220525Well 1	control	8	124.522	115.027	-9.49554	0	0.00976923	1.12372	-0.0927641
233	15.4667	220525Well 1	control	6	124.522	123.104	-1.41822	0	0.00976923	1.20263	-0.0138549
234	15.5333	220525Well 1	control	7	124.522	121.434	-3.08853	0	0.00976923	1.18632	-0.0301726
235	15.6	220525Well 1	control	5	124.522	84.0668	-40.4556	0	0.00976923	0.821268	-0.395221
236	15.6667	220525Well 1	control	8	124.522	131.688	7.16556	1	0.00976923	1.28649	0.070002
237	15.7333	220525Well 1	control	7	124.522	103.192	-21.3305	0	0.00976923	1.00811	-0.208382
238	15.8	220525Well 1	control	7	124.522	81.613	-42.9094	0	0.00976923	0.797296	-0.419192
239	15.8667	220525Well 1	control	6	124.522	108.144	-16.3781	0	0.00976923	1.05649	-0.160001
240	15.9333	220525Well 1	control	7	124.522	147.166	22.644	1	0.00976923	1.4377	0.221214
241	16	220525Well 1	control	8	124.522	137.983	13.4605	1	0.00976923	1.34799	0.131499
242	16.0667	220525Well 1	control	7	124.522	95.4824	-29.04	0	0.00976923	0.93279	-0.283698
243	16.1333	220525Well 1	control	6	124.522	99.348	-25.1745	0	0.00976923	0.970553	-0.245935
244	16.2	220525Well 1	control	7	124.522	123.908	-0.613933	0	0.00976923	1.21049	-0.00599766
245	16.2667	220525Well 1	control	7	124.522	143.894	19.3718	1	0.00976923	1.40574	0.189248
246	16.3333	220525Well 1	control	7	124.522	133.568	9.04571	1	0.00976923	1.30486	0.0883696
247	16.4	220525Well 1	control	6	124.522	119.067	-5.45551	0	0.00976923	1.16319	-0.0532962
248	16.4667	220525Well 1	control	6	124.522	117.926	-6.5966	0	0.00976923	1.15204	-0.0644437
249	16.5333	220525Well 1	control	6	124.522	135.859	11.3363	1	0.00976923	1.32724	0.110747
250	16.6	220525Well 1	control	7	124.522	137.405	12.8823	1	0.00976923	1.34234	0.12585
251	16.6667	220525Well 1	control	7	124.522	127.042	2.51917	1	0.00976923	1.2411	0.0246103
252	16.7333	220525Well 1	control	7	124.522	111.755	-12.7677	0	0.00976923	1.09176	-0.12473
253	16.8	220525Well 1	control	8	124.522	133.914	9.39153	1	0.00976923	1.30824	0.091748
254	16.8667	220525Well 1	control	7	124.522	146.193	21.6704	1	0.00976923	1.42819	0.211703
255	16.9333	220525Well 1	control	7	124.522	97.9323	-26.5901	0	0.00976923	0.956723	-0.259765
256	17	220525Well 1	control	6	124.522	102.745	-21.7771	0	0.00976923	1.00374	-0.212745
257	17.0667	220525Well 1	control	7	124.522	92.4191	-32.1033	0	0.00976923	0.902864	-0.313624
258	17.1333	220525Well 1	control	7	124.522	100.168	-24.3542	0	0.00976923	0.978567	-0.237921
259	17.2	220525Well 1	control	6	124.522	75.7373	-48.7851	0	0.00976923	0.739896	-0.476593
260	17.2667	220525Well 1	control	8	124.522	89.0037	-35.5187	0	0.00976923	0.869498	-0.34699
261	17.3333	220525Well 1	control	7	124.522	137.983	13.4607	1	0.00976923	1.34799	0.131501
262	17.4	220525Well 1	control	6	124.522	72.482	-52.0404	0	0.00976923	0.708093	-0.508395
263	17.4667	220525Well 1	control	6	124.522	128.24	3.71772	1	0.00976923	1.25281	0.0363193
264	17.5333	220525Well 1	control	6	124.522	115.176	-9.34608	0	0.00976923	1.12518	-0.091304
265	17.6	220525Well 1	control	6	124.522	107.943	-16.5789	0	0.00976923	1.05452	-0.161964
266	17.6667	220525Well 1	control	6	124.522	130.831	6.30857	1	0.00976923	1.27812	0.0616298
267	17.7333	220525Well 1	control	6	124.522	91.6957	-32.8267	0	0.00976923	0.895796	-0.320692
268	17.8	220525Well 1	control	6	124.522	87.6111	-36.9113	0	0.00976923	0.855893	-0.360595
269	17.8667	220525Well 1	control	6	124.522	81.6324	-42.89	0	0.00976923	0.797486	-0.419002
270	17.9333	220525Well 1	control	7	124.522	110.812	-13.7105	0	0.00976923	1.08255	-0.133941
271	18	220525Well 1	control	7	124.522	134.09	9.56776	1	0.00976923	1.30996	0.0934697
272	18.0667	220525Well 1	control	6	124.522	124.811	0.288836	1	0.00976923	1.21931	0.0028217
273	18.1333	220525Well 1	control	8	124.522	111.865	-12.657	0	0.00976923	1.09284	-0.123649
274	18.2	220525Well 1	control	6	124.522	108.046	-16.4767	0	0.00976923	1.05552	-0.160965
275	18.2667	220525Well 1	control	8	124.522	94.1903	-30.3321	0	0.00976923	0.920166	-0.296322
276	18.3333	220525Well 1	control	7	124.522	123.136	-1.38622	0	0.00976923	1.20295	-0.0135423
277	18.4	220525Well 1	control	8	124.522	115.927	-8.59545	0	0.00976923	1.13252	-0.083971
278	18.4667	220525Well 1	control	7	124.522	123.047	-1.47542	0	0.00976923	1.20207	-0.0144138
279	18.5333	220525Well 1	control	6	124.522	98.0637	-26.4587	0	0.00976923	0.958007	-0.258481
280	18.6	220525Well 1	control	7	124.522	129.642	5.12	1	0.00976923	1.26651	0.0500184
281	18.6667	220525Well 1	control	6	124.522	137.47	12.9477	1	0.00976923	1.34298	0.126489
282	18.7333	220525Well 1	control	7	124.522	162.797	38.2748	1	0.00976923	1.5904	0.373915
283	18.8	220525Well 1	control	7	124.522	152.766	28.2435	1	0.00976923	1.49241	0.275918
284	18.8667	220525Well 1	control	6	124.522	131.265	6.74231	1	0.00976923	1.28236	0.0658672
285	18.9333	220525Well 1	control	6	124.522	127.156	2.63311	1	0.00976923	1.24221	0.0257235
286	19	220525Well 1	control	6	124.522	134.526	10.0038	1	0.00976923	1.31422	0.097729
287	19.0667	220525Well 1	control	7	124.522	154.624	30.1019	1	0.00976923	1.51056	0.294073
288	19.1333	220525Well 1	control	7	124.522	143.978	19.4552	1	0.00976923	1.40655	0.190063
289	19.2	220525Well 1	control	6	124.522	114.465	-10.0571	0	0.00976923	1.11824	-0.0982502
290	19.2667	220525Well 1	control	7	124.522	156.232	31.71	1	0.00976923	1.52627	0.309783
291	19.3333	220525Well 1	control	7	124.522	116.763	-7.75933	0	0.00976923	1.14069	-0.0758027
292	19.4	220525Well 1	control	7	124.522	132.435	7.913	1	0.00976923	1.29379	0.077304
293	19.4667	220525Well 1	control	7	124.522	137.572	13.0494	1	0.00976923	1.34397	0.127483
294	19.5333	220525Well 1	control	6	124.522	119.28	-5.24275	0	0.00976923	1.16527	-0.0512177
295	19.6	220525Well 1	control	8	124.522	132.091	7.56903	1	0.00976923	1.29043	0.0739436
296	19.6667	220525Well 1	control	8	124.522	126.463	1.94065	1	0.00976923	1.23545	0.0189586
297	19.7333	220525Well 1	control	6	124.522	105.696	-18.8263	0	0.00976923	1.03257	-0.183918
298	19.8	220525Well 1	control	6	124.522	127.509	2.9867	1	0.00976923	1.24567	0.0291777
299	19.8667	220525Well 1	control	7	124.522	146.826	22.3035	1	0.00976923	1.43438	0.217888
300	19.9333	220525Well 1	control	7	124.522	129.568	5.04566	1	0.00976923	1.26578	0.0492923
301	20	220525Well 1	control	7	124.522	157.42	32.8977	1	0.00976923	1.53787	0.321385
1	0	220525Well 2	predator	2	144.026	118.616	-25.4103	0	0.00976923	1.15879	-0.248239
2	0.0666667	220525Well 2	predator	3	144.026	120.514	-23.512	0	0.00976923	1.17733	-0.229694
3	0.133333	220525Well 2	predator	2	144.026	114.287	-29.7397	0	0.00976923	1.11649	-0.290534
4	0.2	220525Well 2	predator	2	144.026	112.029	-31.9974	0	0.00976923	1.09444	-0.31259
5	0.266667	220525Well 2	predator	3	144.026	111.561	-32.4653	0	0.00976923	1.08987	-0.317161
6	0.333333	220525Well 2	predator	2	144.026	109.527	-34.4995	0	0.00976923	1.06999	-0.337034
7	0.4	220525Well 2	predator	3	144.026	110.667	-33.3599	0	0.00976923	1.08113	-0.3259
8	0.466667	220525Well 2	predator	2	144.026	115.292	-28.7347	0	0.00976923	1.12631	-0.280716
9	0.533333	220525Well 2	predator	4	144.026	108.152	-35.8745	0	0.00976923	1.05656	-0.350466
10	0.6	220525Well 2	predator	3	144.026	114.283	-29.7432	0	0.00976923	1.11646	-0.290568
11	0.666667	220525Well 2	predator	3	144.026	110.69	-33.3361	0	0.00976923	1.08136	-0.325668
12	0.733333	220525Well 2	predator	2	144.026	118.521	-25.5057	0	0.00976923	1.15786	-0.249171
13	0.8	220525Well 2	predator	2	144.026	113.179	-30.8476	0	0.00976923	1.10567	-0.301357
14	0.866667	220525Well 2	predator	3	144.026	104.839	-39.1878	0	0.00976923	1.02419	-0.382835
15	0.933333	220525Well 2	predator	3	144.026	103.828	-40.1987	0	0.00976923	1.01432	-0.392711
16	1	220525Well 2	predator	3	144.026	104.614	-39.4126	0	0.00976923	1.022	-0.385031
17	1.06667	220525Well 2	predator	4	144.026	110.984	-33.0424	0	0.00976923	1.08423	-0.322799
18	1.13333	220525Well 2	predator	3	144.026	101.052	-42.9748	0	0.00976923	0.987196	-0.419831
19	1.2	220525Well 2	predator	2	144.026	97.2976	-46.7289	0	0.00976923	0.950522	-0.456505
20	1.26667	220525Well 2	predator	2	144.026	99.5128	-44.5137	0	0.00976923	0.972163	-0.434865
21	1.33333	220525Well 2	predator	3	144.026	99.6474	-44.3791	0	0.00976923	0.973478	-0.433549
22	1.4	220525Well 2	predator	3	144.026	97.5305	-46.496	0	0.00976923	0.952797	-0.45423
23	1.46667	220525Well 2	predator	3	144.026	96.6594	-47.367	0	0.00976923	0.944288	-0.462739
24	1.53333	220525Well 2	predator	3	144.026	94.7832	-49.2433	0	0.00976923	0.925959	-0.481069
25	1.6	220525Well 2	predator	3	144.026	106.344	-37.6826	0	0.00976923	1.0389	-0.36813
26	1.66667	220525Well 2	predator	3	144.026	114.028	-29.9988	0	0.00976923	1.11396	-0.293065
27	1.73333	220525Well 2	predator	3	144.026	112.778	-31.2488	0	0.00976923	1.10175	-0.305277
28	1.8	220525Well 2	predator	3	144.026	112.745	-31.2813	0	0.00976923	1.10143	-0.305594
29	1.86667	220525Well 2	predator	3	144.026	114.091	-29.9358	0	0.00976923	1.11458	-0.29245
30	1.93333	220525Well 2	predator	3	144.026	114.3	-29.7263	0	0.00976923	1.11662	-0.290403
31	2	220525Well 2	predator	3	144.026	112.412	-31.6143	0	0.00976923	1.09818	-0.308847
32	2.06667	220525Well 2	predator	3	144.026	111.618	-32.4085	0	0.00976923	1.09042	-0.316606
33	2.13333	220525Well 2	predator	3	144.026	111.515	-32.5113	0	0.00976923	1.08942	-0.31761
34	2.2	220525Well 2	predator	3	144.026	106.759	-37.2671	0	0.00976923	1.04296	-0.364071
35	2.26667	220525Well 2	predator	3	144.026	111.077	-32.9494	0	0.00976923	1.08514	-0.32189
36	2.33333	220525Well 2	predator	3	144.026	106.235	-37.7917	0	0.00976923	1.03783	-0.369196
37	2.4	220525Well 2	predator	3	144.026	134.641	-9.38519	0	0.00976923	1.31534	-0.0916861
38	2.46667	220525Well 2	predator	3	144.026	113.68	-30.3461	0	0.00976923	1.11057	-0.296458
39	2.53333	220525Well 2	predator	3	144.026	103.523	-40.5034	0	0.00976923	1.01134	-0.395687
40	2.6	220525Well 2	predator	3	144.026	88.3869	-55.6395	0	0.00976923	0.863472	-0.543555
41	2.66667	220525Well 2	predator	3	144.026	85.5721	-58.4544	0	0.00976923	0.835973	-0.571054
42	2.73333	220525Well 2	predator	3	144.026	96.9486	-47.0778	0	0.00976923	0.947113	-0.459914
43	2.8	220525Well 2	predator	3	144.026	94.9099	-49.1166	0	0.00976923	0.927196	-0.479831
44	2.86667	220525Well 2	predator	3	144.026	112.024	-32.0025	0	0.00976923	1.09439	-0.31264
45	2.93333	220525Well 2	predator	3	144.026	113.362	-30.6645	0	0.00976923	1.10746	-0.299569
46	3	220525Well 2	predator	3	144.026	125.85	-18.1763	0	0.00976923	1.22946	-0.177568
47	3.06667	220525Well 2	predator	3	144.026	120.976	-23.0502	0	0.00976923	1.18184	-0.225183
48	3.13333	220525Well 2	predator	3	144.026	123.212	-20.8149	0	0.00976923	1.20368	-0.203346
49	3.2	220525Well 2	predator	4	144.026	118.768	-25.2586	0	0.00976923	1.16027	-0.246757
50	3.26667	220525Well 2	predator	2	144.026	129.18	-14.8462	0	0.00976923	1.26199	-0.145036
51	3.33333	220525Well 2	predator	3	144.026	119.773	-24.2531	0	0.00976923	1.17009	-0.236934
52	3.4	220525Well 2	predator	4	144.026	110.312	-33.7147	0	0.00976923	1.07766	-0.329367
53	3.46667	220525Well 2	predator	3	144.026	114.538	-29.4885	0	0.00976923	1.11895	-0.28808
54	3.53333	220525Well 2	predator	3	144.026	117.879	-26.1477	0	0.00976923	1.15159	-0.255443
55	3.6	220525Well 2	predator	3	144.026	114.06	-29.9668	0	0.00976923	1.11428	-0.292752
56	3.66667	220525Well 2	predator	3	144.026	114.718	-29.3089	0	0.00976923	1.1207	-0.286326
57	3.73333	220525Well 2	predator	2	144.026	119.072	-24.9546	0	0.00976923	1.16324	-0.243787
58	3.8	220525Well 2	predator	3	144.026	115.255	-28.7719	0	0.00976923	1.12595	-0.281079
59	3.86667	220525Well 2	predator	3	144.026	111.048	-32.9781	0	0.00976923	1.08486	-0.322171
60	3.93333	220525Well 2	predator	3	144.026	85.238	-58.7885	0	0.00976923	0.832709	-0.574318
61	4	220525Well 2	predator	3	144.026	82.9739	-61.0525	0	0.00976923	0.810591	-0.596436
62	4.06667	220525Well 2	predator	3	144.026	82.5542	-61.4723	0	0.00976923	0.806491	-0.600537
63	4.13333	220525Well 2	predator	3	144.026	74.6395	-69.3869	0	0.00976923	0.729171	-0.677857
64	4.2	220525Well 2	predator	3	144.026	63.2628	-80.7636	0	0.00976923	0.618029	-0.788998
65	4.26667	220525Well 2	predator	3	144.026	68.6505	-75.376	0	0.00976923	0.670662	-0.736365
66	4.33333	220525Well 2	predator	3	144.026	66.106	-77.9205	0	0.00976923	0.645805	-0.761223
67	4.4	220525Well 2	predator	3	144.026	72.727	-71.2994	0	0.00976923	0.710487	-0.696541
68	4.46667	220525Well 2	predator	4	144.026	81.4088	-62.6177	0	0.00976923	0.795301	-0.611727
69	4.53333	220525Well 2	predator	3	144.026	69.9975	-74.029	0	0.00976923	0.683822	-0.723206
70	4.6	220525Well 2	predator	3	144.026	71.3665	-72.66	0	0.00976923	0.697196	-0.709832
71	4.66667	220525Well 2	predator	3	144.026	73.5672	-70.4592	0	0.00976923	0.718695	-0.688332
72	4.73333	220525Well 2	predator	3	144.026	79.7435	-64.283	0	0.00976923	0.779033	-0.627995
73	4.8	220525Well 2	predator	3	144.026	74.296	-69.7305	0	0.00976923	0.725815	-0.681213
74	4.86667	220525Well 2	predator	4	144.026	68.7201	-75.3064	0	0.00976923	0.671342	-0.735685
75	4.93333	220525Well 2	predator	3	144.026	85.7064	-58.3201	0	0.00976923	0.837285	-0.569742
76	5	220525Well 2	predator	3	144.026	101.562	-42.4649	0	0.00976923	0.992179	-0.414849
77	5.06667	220525Well 2	predator	3	144.026	87.5814	-56.4451	0	0.00976923	0.855602	-0.551425
78	5.13333	220525Well 2	predator	3	144.026	90.9229	-53.1036	0	0.00976923	0.888246	-0.518781
79	5.2	220525Well 2	predator	3	144.026	102.724	-41.3029	0	0.00976923	1.00353	-0.403498
80	5.26667	220525Well 2	predator	3	144.026	118.736	-25.2902	0	0.00976923	1.15996	-0.247066
81	5.33333	220525Well 2	predator	3	144.026	99.8212	-44.2052	0	0.00976923	0.975177	-0.431851
82	5.4	220525Well 2	predator	3	144.026	107.203	-36.8238	0	0.00976923	1.04729	-0.35974
83	5.46667	220525Well 2	predator	3	144.026	100.984	-43.0429	0	0.00976923	0.986531	-0.420496
84	5.53333	220525Well 2	predator	3	144.026	93.3757	-50.6508	0	0.00976923	0.912208	-0.494819
85	5.6	220525Well 2	predator	3	144.026	105.211	-38.8154	0	0.00976923	1.02783	-0.379196
86	5.66667	220525Well 2	predator	3	144.026	112.515	-31.5111	0	0.00976923	1.09919	-0.30784
87	5.73333	220525Well 2	predator	3	144.026	107.811	-36.2154	0	0.00976923	1.05323	-0.353797
88	5.8	220525Well 2	predator	3	144.026	129.697	-14.3293	0	0.00976923	1.26704	-0.139987
89	5.86667	220525Well 2	predator	3	144.026	124.094	-19.9322	0	0.00976923	1.21231	-0.194723
90	5.93333	220525Well 2	predator	3	144.026	115.119	-28.9073	0	0.00976923	1.12463	-0.282402
91	6	220525Well 2	predator	3	144.026	116.109	-27.9177	0	0.00976923	1.13429	-0.272735
92	6.06667	220525Well 2	predator	3	144.026	138.728	-5.29885	0	0.00976923	1.35526	-0.0517657
93	6.13333	220525Well 2	predator	3	144.026	136.502	-7.52449	0	0.00976923	1.33352	-0.0735085
94	6.2	220525Well 2	predator	3	144.026	115.431	-28.5955	0	0.00976923	1.12767	-0.279356
95	6.26667	220525Well 2	predator	3	144.026	150.435	6.40811	1	0.00976923	1.46963	0.0626023
96	6.33333	220525Well 2	predator	3	144.026	157.287	13.2605	1	0.00976923	1.53657	0.129545
97	6.4	220525Well 2	predator	3	144.026	142.508	-1.5186	0	0.00976923	1.39219	-0.0148355
98	6.46667	220525Well 2	predator	3	144.026	155.833	11.8067	1	0.00976923	1.52237	0.115343
99	6.53333	220525Well 2	predator	3	144.026	199.098	55.0716	1	0.00976923	1.94504	0.538008
100	6.6	220525Well 2	predator	2	144.026	246.376	102.349	1	0.00976923	2.4069	0.999875
101	6.66667	220525Well 2	predator	3	144.026	213.114	69.0879	1	0.00976923	2.08196	0.674936
102	6.73333	220525Well 2	predator	3	144.026	164.178	20.1511	1	0.00976923	1.60389	0.19686
103	6.8	220525Well 2	predator	3	144.026	152.817	8.79093	1	0.00976923	1.49291	0.0858806
104	6.86667	220525Well 2	predator	3	144.026	142.673	-1.35372	0	0.00976923	1.3938	-0.0132248
105	6.93333	220525Well 2	predator	3	144.026	123.761	-20.2651	0	0.00976923	1.20905	-0.197974
106	7	220525Well 2	predator	3	144.026	132.293	-11.733	0	0.00976923	1.29241	-0.114622
107	7.06667	220525Well 2	predator	3	144.026	135.479	-8.54786	0	0.00976923	1.32352	-0.083506
108	7.13333	220525Well 2	predator	3	144.026	113.618	-30.4083	0	0.00976923	1.10996	-0.297065
109	7.2	220525Well 2	predator	3	144.026	92.7539	-51.2725	0	0.00976923	0.906134	-0.500893
110	7.26667	220525Well 2	predator	3	144.026	95.3754	-48.651	0	0.00976923	0.931744	-0.475283
111	7.33333	220525Well 2	predator	3	144.026	97.0754	-46.9511	0	0.00976923	0.948352	-0.458676
112	7.4	220525Well 2	predator	3	144.026	133.132	-10.8941	0	0.00976923	1.3006	-0.106427
113	7.46667	220525Well 2	predator	3	144.026	156.915	12.8882	1	0.00976923	1.53294	0.125908
114	7.53333	220525Well 2	predator	3	144.026	143.961	-0.0656364	0	0.00976923	1.40639	-0.000641217
115	7.6	220525Well 2	predator	3	144.026	150.932	6.90559	1	0.00976923	1.47449	0.0674623
116	7.66667	220525Well 2	predator	3	144.026	149.134	5.1075	1	0.00976923	1.45692	0.0498963
117	7.73333	220525Well 2	predator	3	144.026	134.461	-9.56577	0	0.00976923	1.31358	-0.0934502
118	7.8	220525Well 2	predator	3	144.026	149.601	5.57468	1	0.00976923	1.46149	0.0544604
119	7.86667	220525Well 2	predator	3	144.026	177.722	33.6959	1	0.00976923	1.73621	0.329183
120	7.93333	220525Well 2	predator	3	144.026	151.65	7.62315	1	0.00976923	1.4815	0.0744723
121	8	220525Well 2	predator	3	144.026	158.131	14.1045	1	0.00976923	1.54482	0.13779
122	8.06667	220525Well 2	predator	3	144.026	159.815	15.7884	1	0.00976923	1.56127	0.154241
123	8.13333	220525Well 2	predator	3	144.026	173.15	29.1233	1	0.00976923	1.69154	0.284512
124	8.2	220525Well 2	predator	3	144.026	156.417	12.3906	1	0.00976923	1.52807	0.121046
125	8.26667	220525Well 2	predator	3	144.026	94.1967	-49.8298	0	0.00976923	0.920229	-0.486798
126	8.33333	220525Well 2	predator	3	144.026	89.269	-54.7574	0	0.00976923	0.87209	-0.534938
127	8.4	220525Well 2	predator	3	144.026	90.3068	-53.7197	0	0.00976923	0.882228	-0.5248
128	8.46667	220525Well 2	predator	3	144.026	104.018	-40.0087	0	0.00976923	1.01617	-0.390854
129	8.53333	220525Well 2	predator	3	144.026	94.7065	-49.32	0	0.00976923	0.92521	-0.481818
130	8.6	220525Well 2	predator	3	144.026	107.254	-36.7724	0	0.00976923	1.04779	-0.359238
131	8.66667	220525Well 2	predator	3	144.026	127.146	-16.8805	0	0.00976923	1.24212	-0.16491
132	8.73333	220525Well 2	predator	3	144.026	89.3496	-54.6768	0	0.00976923	0.872877	-0.53415
133	8.8	220525Well 2	predator	4	144.026	104.542	-39.4841	0	0.00976923	1.0213	-0.385729
134	8.86667	220525Well 2	predator	3	144.026	107.784	-36.2425	0	0.00976923	1.05297	-0.354061
135	8.93333	220525Well 2	predator	3	144.026	84.5914	-59.435	0	0.00976923	0.826393	-0.580634
136	9	220525Well 2	predator	3	144.026	74.1467	-69.8798	0	0.00976923	0.724356	-0.682672
137	9.06667	220525Well 2	predator	2	144.026	84.9147	-59.1117	0	0.00976923	0.829552	-0.577476
138	9.13333	220525Well 2	predator	3	144.026	98.1061	-45.9204	0	0.00976923	0.958421	-0.448607
139	9.2	220525Well 2	predator	3	144.026	104.344	-39.6825	0	0.00976923	1.01936	-0.387668
140	9.26667	220525Well 2	predator	3	144.026	83.1516	-60.8748	0	0.00976923	0.812327	-0.5947
141	9.33333	220525Well 2	predator	3	144.026	156.721	12.6945	1	0.00976923	1.53104	0.124016
142	9.4	220525Well 2	predator	3	144.026	116.092	-27.9344	0	0.00976923	1.13413	-0.272897
143	9.46667	220525Well 2	predator	3	144.026	150.722	6.69524	1	0.00976923	1.47243	0.0654073
144	9.53333	220525Well 2	predator	3	144.026	129.479	-14.5472	0	0.00976923	1.26491	-0.142115
145	9.6	220525Well 2	predator	3	144.026	47.1358	-96.8906	0	0.00976923	0.460481	-0.946547
146	9.66667	220525Well 2	predator	3	144.026	245.434	101.408	1	0.00976923	2.3977	0.990677
147	9.73333	220525Well 2	predator	3	144.026	188.096	44.0696	1	0.00976923	1.83755	0.430526
148	9.8	220525Well 2	predator	3	144.026	126.438	-17.5881	0	0.00976923	1.23521	-0.171822
149	9.86667	220525Well 2	predator	3	144.026	136.448	-7.57849	0	0.00976923	1.33299	-0.074036
150	9.93333	220525Well 2	predator	3	144.026	201.637	57.6109	1	0.00976923	1.96984	0.562814
151	10	220525Well 2	predator	3	144.026	131.909	-12.1177	0	0.00976923	1.28865	-0.118381
152	10.0667	220525Well 2	predator	3	144.026	112.632	-31.3946	0	0.00976923	1.10033	-0.306701
153	10.1333	220525Well 2	predator	3	144.026	112.56	-31.4663	0	0.00976923	1.09963	-0.307401
154	10.2	220525Well 2	predator	3	144.026	124.035	-19.9914	0	0.00976923	1.21173	-0.195301
155	10.2667	220525Well 2	predator	3	144.026	94.7129	-49.3135	0	0.00976923	0.925272	-0.481755
156	10.3333	220525Well 2	predator	3	144.026	181.271	37.2446	1	0.00976923	1.77088	0.363851
157	10.4	220525Well 2	predator	3	144.026	86.6262	-57.4003	0	0.00976923	0.846271	-0.560757
158	10.4667	220525Well 2	predator	3	144.026	101.489	-42.5376	0	0.00976923	0.991468	-0.415559
159	10.5333	220525Well 2	predator	3	144.026	173.932	29.906	1	0.00976923	1.69919	0.292159
160	10.6	220525Well 2	predator	3	144.026	165.186	21.1598	1	0.00976923	1.61374	0.206715
161	10.6667	220525Well 2	predator	3	144.026	184.243	40.2165	1	0.00976923	1.79991	0.392884
162	10.7333	220525Well 2	predator	3	144.026	144.343	0.316634	1	0.00976923	1.41012	0.00309327
163	10.8	220525Well 2	predator	3	144.026	141.198	-2.82845	0	0.00976923	1.3794	-0.0276318
164	10.8667	220525Well 2	predator	3	144.026	183.876	39.8496	1	0.00976923	1.79633	0.3893
165	10.9333	220525Well 2	predator	3	144.026	109.657	-34.3692	0	0.00976923	1.07127	-0.335761
166	11	220525Well 2	predator	3	144.026	95.7084	-48.3181	0	0.00976923	0.934997	-0.472031
167	11.0667	220525Well 2	predator	3	144.026	85.2914	-58.735	0	0.00976923	0.833231	-0.573796
168	11.1333	220525Well 2	predator	3	144.026	68.8126	-75.2138	0	0.00976923	0.672246	-0.734781
169	11.2	220525Well 2	predator	3	144.026	111.85	-32.1762	0	0.00976923	1.09269	-0.314337
170	11.2667	220525Well 2	predator	3	144.026	141.769	-2.25794	0	0.00976923	1.38497	-0.0220583
171	11.3333	220525Well 2	predator	3	144.026	173.38	29.3535	1	0.00976923	1.69379	0.286761
172	11.4	220525Well 2	predator	3	144.026	158.897	14.8704	1	0.00976923	1.5523	0.145273
173	11.4667	220525Well 2	predator	3	144.026	140.865	-3.16166	0	0.00976923	1.37614	-0.030887
174	11.5333	220525Well 2	predator	3	144.026	131.493	-12.5337	0	0.00976923	1.28458	-0.122444
175	11.6	220525Well 2	predator	3	144.026	149.004	4.97732	1	0.00976923	1.45565	0.0486246
176	11.6667	220525Well 2	predator	3	144.026	200.235	56.2088	1	0.00976923	1.95614	0.549117
177	11.7333	220525Well 2	predator	3	144.026	172.294	28.2679	1	0.00976923	1.68318	0.276155
178	11.8	220525Well 2	predator	3	144.026	200.332	56.3059	1	0.00976923	1.95709	0.550065
179	11.8667	220525Well 2	predator	3	144.026	222.604	78.5772	1	0.00976923	2.17467	0.767639
180	11.9333	220525Well 2	predator	3	144.026	200.085	56.0583	1	0.00976923	1.95467	0.547646
181	12	220525Well 2	predator	2	144.026	211.011	66.9845	1	0.00976923	2.06142	0.654387
182	12.0667	220525Well 2	predator	3	144.026	147.583	3.55614	1	0.00976923	1.44177	0.0347408
183	12.1333	220525Well 2	predator	3	144.026	182.291	38.2644	1	0.00976923	1.78084	0.373814
184	12.2	220525Well 2	predator	3	144.026	102.784	-41.2427	0	0.00976923	1.00412	-0.402909
185	12.2667	220525Well 2	predator	3	144.026	113.731	-30.2954	0	0.00976923	1.11106	-0.295963
186	12.3333	220525Well 2	predator	3	144.026	165.197	21.1704	1	0.00976923	1.61385	0.206819
187	12.4	220525Well 2	predator	3	144.026	77.006	-67.0204	0	0.00976923	0.752289	-0.654738
188	12.4667	220525Well 2	predator	3	144.026	142.042	-1.98477	0	0.00976923	1.38764	-0.0193897
189	12.5333	220525Well 2	predator	3	144.026	132.14	-11.8863	0	0.00976923	1.29091	-0.11612
190	12.6	220525Well 2	predator	3	144.026	132.517	-11.5098	0	0.00976923	1.29459	-0.112442
191	12.6667	220525Well 2	predator	3	144.026	141.511	-2.51558	0	0.00976923	1.38245	-0.0245753
192	12.7333	220525Well 2	predator	3	144.026	134.435	-9.59151	0	0.00976923	1.31333	-0.0937017
193	12.8	220525Well 2	predator	3	144.026	174.059	30.0321	1	0.00976923	1.70042	0.293391
194	12.8667	220525Well 2	predator	3	144.026	133.189	-10.8372	0	0.00976923	1.30116	-0.105871
195	12.9333	220525Well 2	predator	3	144.026	124.759	-19.2679	0	0.00976923	1.21879	-0.188233
196	13	220525Well 2	predator	3	144.026	129.85	-14.1765	0	0.00976923	1.26853	-0.138494
197	13.0667	220525Well 2	predator	3	144.026	119.217	-24.8097	0	0.00976923	1.16466	-0.242371
198	13.1333	220525Well 2	predator	3	144.026	123.375	-20.6516	0	0.00976923	1.20528	-0.20175
199	13.2	220525Well 2	predator	3	144.026	170.829	26.803	1	0.00976923	1.66887	0.261845
200	13.2667	220525Well 2	predator	3	144.026	182.39	38.3634	1	0.00976923	1.78181	0.374781
201	13.3333	220525Well 2	predator	3	144.026	112.087	-31.9392	0	0.00976923	1.09501	-0.312021
202	13.4	220525Well 2	predator	3	144.026	85.6728	-58.3536	0	0.00976923	0.836958	-0.57007
203	13.4667	220525Well 2	predator	3	144.026	91.5055	-52.5209	0	0.00976923	0.893938	-0.513089
204	13.5333	220525Well 2	predator	3	144.026	132.343	-11.6834	0	0.00976923	1.29289	-0.114138
205	13.6	220525Well 2	predator	3	144.026	89.9449	-54.0815	0	0.00976923	0.878693	-0.528335
206	13.6667	220525Well 2	predator	3	144.026	131.771	-12.2558	0	0.00976923	1.2873	-0.11973
207	13.7333	220525Well 2	predator	3	144.026	107.73	-36.296	0	0.00976923	1.05244	-0.354584
208	13.8	220525Well 2	predator	3	144.026	125.31	-18.7165	0	0.00976923	1.22418	-0.182846
209	13.8667	220525Well 2	predator	3	144.026	167.039	23.0124	1	0.00976923	1.63184	0.224813
210	13.9333	220525Well 2	predator	3	144.026	198.133	54.1062	1	0.00976923	1.9356	0.528576
211	14	220525Well 2	predator	3	144.026	155.008	10.9816	1	0.00976923	1.51431	0.107282
212	14.0667	220525Well 2	predator	3	144.026	155.741	11.715	1	0.00976923	1.52147	0.114446
213	14.1333	220525Well 2	predator	3	144.026	145.684	1.65803	1	0.00976923	1.42323	0.0161977
214	14.2	220525Well 2	predator	3	144.026	160.224	16.198	1	0.00976923	1.56527	0.158242
215	14.2667	220525Well 2	predator	3	144.026	128.17	-15.8564	0	0.00976923	1.25212	-0.154905
216	14.3333	220525Well 2	predator	3	144.026	108.294	-35.7324	0	0.00976923	1.05795	-0.349078
217	14.4	220525Well 2	predator	3	144.026	106.39	-37.6363	0	0.00976923	1.03935	-0.367678
218	14.4667	220525Well 2	predator	3	144.026	109.927	-34.0997	0	0.00976923	1.0739	-0.333127
219	14.5333	220525Well 2	predator	3	144.026	108.499	-35.5278	0	0.00976923	1.05995	-0.34708
220	14.6	220525Well 2	predator	3	144.026	96.9293	-47.0972	0	0.00976923	0.946924	-0.460103
221	14.6667	220525Well 2	predator	3	144.026	105.344	-38.682	0	0.00976923	1.02913	-0.377893
222	14.7333	220525Well 2	predator	4	144.026	87.0593	-56.9672	0	0.00976923	0.850502	-0.556526
223	14.8	220525Well 2	predator	4	144.026	87.4185	-56.608	0	0.00976923	0.854011	-0.553016
224	14.8667	220525Well 2	predator	3	144.026	110.167	-33.859	0	0.00976923	1.07625	-0.330776
225	14.9333	220525Well 2	predator	3	144.026	121.323	-22.7033	0	0.00976923	1.18523	-0.221793
226	15	220525Well 2	predator	3	144.026	184.559	40.5322	1	0.00976923	1.803	0.395968
227	15.0667	220525Well 2	predator	3	144.026	182.515	38.4887	1	0.00976923	1.78303	0.376005
228	15.1333	220525Well 2	predator	3	144.026	147.288	3.26194	1	0.00976923	1.43889	0.0318666
229	15.2	220525Well 2	predator	3	144.026	120.341	-23.6854	0	0.00976923	1.17564	-0.231388
230	15.2667	220525Well 2	predator	3	144.026	64.0652	-79.9613	0	0.00976923	0.625867	-0.78116
231	15.3333	220525Well 2	predator	3	144.026	102.423	-41.6038	0	0.00976923	1.00059	-0.406437
232	15.4	220525Well 2	predator	3	144.026	84.9115	-59.1149	0	0.00976923	0.82952	-0.577507
233	15.4667	220525Well 2	predator	2	144.026	84.8336	-59.1928	0	0.00976923	0.828759	-0.578269
234	15.5333	220525Well 2	predator	3	144.026	76.2048	-67.8216	0	0.00976923	0.744463	-0.662565
235	15.6	220525Well 2	predator	3	144.026	90.0052	-54.0213	0	0.00976923	0.879282	-0.527746
236	15.6667	220525Well 2	predator	3	144.026	100.278	-43.748	0	0.00976923	0.979643	-0.427384
237	15.7333	220525Well 2	predator	3	144.026	105.331	-38.6957	0	0.00976923	1.029	-0.378027
238	15.8	220525Well 2	predator	3	144.026	99.1821	-44.8444	0	0.00976923	0.968933	-0.438095
239	15.8667	220525Well 2	predator	3	144.026	148.069	4.04215	1	0.00976923	1.44652	0.0394887
240	15.9333	220525Well 2	predator	3	144.026	101.726	-42.3008	0	0.00976923	0.993781	-0.413246
241	16	220525Well 2	predator	3	144.026	103.662	-40.3643	0	0.00976923	1.0127	-0.394328
242	16.0667	220525Well 2	predator	3	144.026	92.8206	-51.2058	0	0.00976923	0.906786	-0.500242
243	16.1333	220525Well 2	predator	3	144.026	91.2453	-52.7812	0	0.00976923	0.891396	-0.515631
244	16.2	220525Well 2	predator	3	144.026	145.332	1.30604	1	0.00976923	1.41979	0.012759
245	16.2667	220525Well 2	predator	3	144.026	140.183	-3.84354	0	0.00976923	1.36948	-0.0375485
246	16.3333	220525Well 2	predator	3	144.026	164.247	20.2208	1	0.00976923	1.60457	0.197541
247	16.4	220525Well 2	predator	3	144.026	179.378	35.3516	1	0.00976923	1.75239	0.345358
248	16.4667	220525Well 2	predator	3	144.026	155.071	11.0443	1	0.00976923	1.51492	0.107895
249	16.5333	220525Well 2	predator	3	144.026	111.581	-32.4456	0	0.00976923	1.09006	-0.316969
250	16.6	220525Well 2	predator	3	144.026	159.923	15.8961	1	0.00976923	1.56232	0.155292
251	16.6667	220525Well 2	predator	3	144.026	101.81	-42.2167	0	0.00976923	0.994603	-0.412424
252	16.7333	220525Well 2	predator	4	144.026	99.9106	-44.1159	0	0.00976923	0.97605	-0.430978
253	16.8	220525Well 2	predator	3	144.026	95.7251	-48.3013	0	0.00976923	0.935161	-0.471867
254	16.8667	220525Well 2	predator	3	144.026	92.4068	-51.6196	0	0.00976923	0.902743	-0.504284
255	16.9333	220525Well 2	predator	3	144.026	106.637	-37.3893	0	0.00976923	1.04176	-0.365265
256	17	220525Well 2	predator	3	144.026	162.567	18.5403	1	0.00976923	1.58815	0.181124
257	17.0667	220525Well 2	predator	3	144.026	119.267	-24.7599	0	0.00976923	1.16514	-0.241886
258	17.1333	220525Well 2	predator	3	144.026	142.275	-1.75193	0	0.00976923	1.38991	-0.017115
259	17.2	220525Well 2	predator	3	144.026	128.537	-15.4895	0	0.00976923	1.25571	-0.151321
260	17.2667	220525Well 2	predator	3	144.026	148.502	4.4752	1	0.00976923	1.45075	0.0437192
261	17.3333	220525Well 2	predator	3	144.026	107.509	-36.5179	0	0.00976923	1.05028	-0.356752
262	17.4	220525Well 2	predator	3	144.026	105.742	-38.2844	0	0.00976923	1.03302	-0.374009
263	17.4667	220525Well 2	predator	3	144.026	106.572	-37.4545	0	0.00976923	1.04113	-0.365901
264	17.5333	220525Well 2	predator	3	144.026	137.404	-6.62274	0	0.00976923	1.34233	-0.0646991
265	17.6	220525Well 2	predator	3	144.026	106.938	-37.0883	0	0.00976923	1.0447	-0.362324
266	17.6667	220525Well 2	predator	3	144.026	97.6812	-46.3453	0	0.00976923	0.95427	-0.452758
267	17.7333	220525Well 2	predator	3	144.026	108.329	-35.6975	0	0.00976923	1.05829	-0.348737
268	17.8	220525Well 2	predator	3	144.026	116.4	-27.6263	0	0.00976923	1.13714	-0.269887
269	17.8667	220525Well 2	predator	3	144.026	113.362	-30.6645	0	0.00976923	1.10746	-0.299568
270	17.9333	220525Well 2	predator	3	144.026	143.213	-0.813939	0	0.00976923	1.39908	-0.00795156
271	18	220525Well 2	predator	3	144.026	117.492	-26.5346	0	0.00976923	1.1478	-0.259223
272	18.0667	220525Well 2	predator	3	144.026	86.0359	-57.9906	0	0.00976923	0.840504	-0.566523
273	18.1333	220525Well 2	predator	3	144.026	159.581	15.5549	1	0.00976923	1.55899	0.15196
274	18.2	220525Well 2	predator	3	144.026	162.276	18.2495	1	0.00976923	1.58531	0.178283
275	18.2667	220525Well 2	predator	3	144.026	174.079	30.053	1	0.00976923	1.70062	0.293595
276	18.3333	220525Well 2	predator	3	144.026	165.855	21.829	1	0.00976923	1.62028	0.213252
277	18.4	220525Well 2	predator	3	144.026	206.563	62.5363	1	0.00976923	2.01796	0.610931
278	18.4667	220525Well 2	predator	3	144.026	202.091	58.0641	1	0.00976923	1.97427	0.567241
279	18.5333	220525Well 2	predator	3	144.026	179.891	35.8642	1	0.00976923	1.75739	0.350366
280	18.6	220525Well 2	predator	3	144.026	190.964	46.9373	1	0.00976923	1.86557	0.458541
281	18.6667	220525Well 2	predator	3	144.026	191.757	47.731	1	0.00976923	1.87332	0.466295
282	18.7333	220525Well 2	predator	3	144.026	123.089	-20.937	0	0.00976923	1.20249	-0.204539
283	18.8	220525Well 2	predator	3	144.026	117.902	-26.124	0	0.00976923	1.15182	-0.255211
284	18.8667	220525Well 2	predator	3	144.026	96.396	-47.6305	0	0.00976923	0.941715	-0.465313
285	18.9333	220525Well 2	predator	3	144.026	126.772	-17.2541	0	0.00976923	1.23847	-0.16856
286	19	220525Well 2	predator	3	144.026	125.601	-18.4253	0	0.00976923	1.22703	-0.180001
287	19.0667	220525Well 2	predator	3	144.026	129.056	-14.9707	0	0.00976923	1.26078	-0.146252
288	19.1333	220525Well 2	predator	3	144.026	153.104	9.07748	1	0.00976923	1.49571	0.08868
289	19.2	220525Well 2	predator	3	144.026	102.693	-41.3339	0	0.00976923	1.00323	-0.403801
290	19.2667	220525Well 2	predator	3	144.026	74.7147	-69.3117	0	0.00976923	0.729906	-0.677122
291	19.3333	220525Well 2	predator	3	144.026	73.2087	-70.8178	0	0.00976923	0.715192	-0.691835
292	19.4	220525Well 2	predator	3	144.026	69.6901	-74.3364	0	0.00976923	0.680818	-0.726209
293	19.4667	220525Well 2	predator	3	144.026	71.1745	-72.852	0	0.00976923	0.69532	-0.711708
294	19.5333	220525Well 2	predator	3	144.026	62.0784	-81.9481	0	0.00976923	0.606458	-0.80057
295	19.6	220525Well 2	predator	3	144.026	72.6698	-71.3566	0	0.00976923	0.709928	-0.697099
296	19.6667	220525Well 2	predator	3	144.026	78.5606	-65.4658	0	0.00976923	0.767477	-0.639551
297	19.7333	220525Well 2	predator	3	144.026	77.7585	-66.268	0	0.00976923	0.759641	-0.647387
298	19.8	220525Well 2	predator	3	144.026	80.1761	-63.8503	0	0.00976923	0.783259	-0.623769
299	19.8667	220525Well 2	predator	3	144.026	81.6711	-62.3553	0	0.00976923	0.797864	-0.609163
300	19.9333	220525Well 2	predator	3	144.026	82.3534	-61.673	0	0.00976923	0.80453	-0.602498
301	20	220525Well 2	predator	3	144.026	85.248	-58.7785	0	0.00976923	0.832807	-0.57422
1	0	220525Well 3	control	4	123.547	88.826	-34.7212	0	0.00976923	0.867762	-0.339199
2	0.0666667	220525Well 3	control	5	123.547	90.0445	-33.5027	0	0.00976923	0.879666	-0.327296
3	0.133333	220525Well 3	control	5	123.547	89.9784	-33.5688	0	0.00976923	0.87902	-0.327942
4	0.2	220525Well 3	control	6	123.547	91.9334	-31.6138	0	0.00976923	0.898119	-0.308842
5	0.266667	220525Well 3	control	7	123.547	92.5539	-30.9933	0	0.00976923	0.904181	-0.30278
6	0.333333	220525Well 3	control	7	123.547	93.1078	-30.4394	0	0.00976923	0.909592	-0.29737
7	0.4	220525Well 3	control	5	123.547	92.981	-30.5662	0	0.00976923	0.908353	-0.298608
8	0.466667	220525Well 3	control	6	123.547	91.309	-32.2382	0	0.00976923	0.892018	-0.314943
9	0.533333	220525Well 3	control	5	123.547	93.0645	-30.4828	0	0.00976923	0.909168	-0.297793
10	0.6	220525Well 3	control	6	123.547	93.6641	-29.8831	0	0.00976923	0.915026	-0.291935
11	0.666667	220525Well 3	control	7	123.547	96.6201	-26.9271	0	0.00976923	0.943904	-0.263057
12	0.733333	220525Well 3	control	4	123.547	97.3366	-26.2106	0	0.00976923	0.950904	-0.256057
13	0.8	220525Well 3	control	4	123.547	97.1404	-26.4068	0	0.00976923	0.948987	-0.257974
14	0.866667	220525Well 3	control	4	123.547	94.144	-29.4032	0	0.00976923	0.919714	-0.287247
15	0.933333	220525Well 3	control	7	123.547	90.832	-32.7153	0	0.00976923	0.887358	-0.319603
16	1	220525Well 3	control	6	123.547	89.1011	-34.4461	0	0.00976923	0.870449	-0.336512
17	1.06667	220525Well 3	control	6	123.547	96.2129	-27.3344	0	0.00976923	0.939926	-0.267036
18	1.13333	220525Well 3	control	6	123.547	91.6045	-31.9427	0	0.00976923	0.894906	-0.312055
19	1.2	220525Well 3	control	7	123.547	90.5351	-33.0121	0	0.00976923	0.884459	-0.322502
20	1.26667	220525Well 3	control	8	123.547	89.5605	-33.9867	0	0.00976923	0.874937	-0.332024
21	1.33333	220525Well 3	control	4	123.547	88.3449	-35.2023	0	0.00976923	0.863062	-0.343899
22	1.4	220525Well 3	control	6	123.547	85.5038	-38.0434	0	0.00976923	0.835306	-0.371655
23	1.46667	220525Well 3	control	7	123.547	91.6813	-31.8659	0	0.00976923	0.895656	-0.311306
24	1.53333	220525Well 3	control	6	123.547	82.3215	-41.2257	0	0.00976923	0.804218	-0.402744
25	1.6	220525Well 3	control	5	123.547	87.0798	-36.4674	0	0.00976923	0.850703	-0.356258
26	1.66667	220525Well 3	control	7	123.547	85.2161	-38.3311	0	0.00976923	0.832496	-0.374466
27	1.73333	220525Well 3	control	6	123.547	85.2428	-38.3044	0	0.00976923	0.832757	-0.374205
28	1.8	220525Well 3	control	6	123.547	86.5813	-36.9659	0	0.00976923	0.845833	-0.361129
29	1.86667	220525Well 3	control	7	123.547	86.6474	-36.8998	0	0.00976923	0.846478	-0.360483
30	1.93333	220525Well 3	control	6	123.547	89.2504	-34.2968	0	0.00976923	0.871908	-0.335053
31	2	220525Well 3	control	6	123.547	88.7593	-34.7879	0	0.00976923	0.867111	-0.339851
32	2.06667	220525Well 3	control	6	123.547	86.8491	-36.6981	0	0.00976923	0.848449	-0.358512
33	2.13333	220525Well 3	control	6	123.547	88.9604	-34.5869	0	0.00976923	0.869074	-0.337887
34	2.2	220525Well 3	control	6	123.547	88.3225	-35.2247	0	0.00976923	0.862843	-0.344118
35	2.26667	220525Well 3	control	6	123.547	90.8917	-32.6555	0	0.00976923	0.887942	-0.319019
36	2.33333	220525Well 3	control	5	123.547	87.4282	-36.119	0	0.00976923	0.854106	-0.352855
37	2.4	220525Well 3	control	6	123.547	98.8951	-24.6521	0	0.00976923	0.966129	-0.240832
38	2.46667	220525Well 3	control	6	123.547	95.9434	-27.6038	0	0.00976923	0.937293	-0.269668
39	2.53333	220525Well 3	control	6	123.547	84.5733	-38.9739	0	0.00976923	0.826216	-0.380745
40	2.6	220525Well 3	control	6	123.547	84.5476	-38.9996	0	0.00976923	0.825965	-0.380996
41	2.66667	220525Well 3	control	5	123.547	80.2399	-43.3074	0	0.00976923	0.783882	-0.42308
42	2.73333	220525Well 3	control	4	123.547	81.3374	-42.2098	0	0.00976923	0.794604	-0.412357
43	2.8	220525Well 3	control	5	123.547	78.2503	-45.2969	0	0.00976923	0.764445	-0.442516
44	2.86667	220525Well 3	control	7	123.547	68.442	-55.1052	0	0.00976923	0.668626	-0.538336
45	2.93333	220525Well 3	control	6	123.547	72.3223	-51.2249	0	0.00976923	0.706533	-0.500428
46	3	220525Well 3	control	6	123.547	83.6838	-39.8634	0	0.00976923	0.817527	-0.389435
47	3.06667	220525Well 3	control	6	123.547	80.4423	-43.1049	0	0.00976923	0.785859	-0.421102
48	3.13333	220525Well 3	control	6	123.547	83.9711	-39.5761	0	0.00976923	0.820333	-0.386628
49	3.2	220525Well 3	control	6	123.547	81.8746	-41.6726	0	0.00976923	0.799852	-0.407109
50	3.26667	220525Well 3	control	6	123.547	81.9225	-41.6247	0	0.00976923	0.80032	-0.406641
51	3.33333	220525Well 3	control	6	123.547	81.5231	-42.0241	0	0.00976923	0.796418	-0.410543
52	3.4	220525Well 3	control	6	123.547	81.6449	-41.9024	0	0.00976923	0.797607	-0.409354
53	3.46667	220525Well 3	control	6	123.547	85.684	-37.8632	0	0.00976923	0.837067	-0.369895
54	3.53333	220525Well 3	control	6	123.547	85.3365	-38.2107	0	0.00976923	0.833672	-0.373289
55	3.6	220525Well 3	control	6	123.547	79.2768	-44.2704	0	0.00976923	0.774474	-0.432487
56	3.66667	220525Well 3	control	6	123.547	79.7048	-43.8424	0	0.00976923	0.778655	-0.428307
57	3.73333	220525Well 3	control	6	123.547	73.8625	-49.6847	0	0.00976923	0.72158	-0.485381
58	3.8	220525Well 3	control	5	123.547	72.9704	-50.5768	0	0.00976923	0.712865	-0.494097
59	3.86667	220525Well 3	control	6	123.547	78.5253	-45.0219	0	0.00976923	0.767132	-0.439829
60	3.93333	220525Well 3	control	7	123.547	96.5656	-26.9816	0	0.00976923	0.943372	-0.26359
61	4	220525Well 3	control	7	123.547	101.547	-22.0007	0	0.00976923	0.992031	-0.21493
62	4.06667	220525Well 3	control	7	123.547	99.0574	-24.4898	0	0.00976923	0.967715	-0.239246
63	4.13333	220525Well 3	control	5	123.547	89.6801	-33.8671	0	0.00976923	0.876105	-0.330856
64	4.2	220525Well 3	control	5	123.547	94.4971	-29.0502	0	0.00976923	0.923163	-0.283798
65	4.26667	220525Well 3	control	4	123.547	80.8241	-42.7231	0	0.00976923	0.789589	-0.417372
66	4.33333	220525Well 3	control	6	123.547	80.6895	-42.8577	0	0.00976923	0.788274	-0.418687
67	4.4	220525Well 3	control	6	123.547	81.9982	-41.549	0	0.00976923	0.801059	-0.405902
68	4.46667	220525Well 3	control	5	123.547	63.3358	-60.2114	0	0.00976923	0.618742	-0.588219
69	4.53333	220525Well 3	control	6	123.547	61.6376	-61.9096	0	0.00976923	0.602152	-0.604809
70	4.6	220525Well 3	control	6	123.547	67.2668	-56.2804	0	0.00976923	0.657145	-0.549816
71	4.66667	220525Well 3	control	6	123.547	61.8614	-61.6858	0	0.00976923	0.604338	-0.602623
72	4.73333	220525Well 3	control	6	123.547	61.5318	-62.0154	0	0.00976923	0.601118	-0.605843
73	4.8	220525Well 3	control	6	123.547	84.0297	-39.5176	0	0.00976923	0.820905	-0.386056
74	4.86667	220525Well 3	control	6	123.547	70.3941	-53.1531	0	0.00976923	0.687696	-0.519265
75	4.93333	220525Well 3	control	6	123.547	87.2867	-36.2605	0	0.00976923	0.852724	-0.354237
76	5	220525Well 3	control	6	123.547	71.8035	-51.7438	0	0.00976923	0.701465	-0.505497
77	5.06667	220525Well 3	control	6	123.547	68.4585	-55.0888	0	0.00976923	0.668786	-0.538175
78	5.13333	220525Well 3	control	7	123.547	77.9763	-45.5709	0	0.00976923	0.761769	-0.445193
79	5.2	220525Well 3	control	6	123.547	75.5484	-47.9988	0	0.00976923	0.73805	-0.468911
80	5.26667	220525Well 3	control	6	123.547	73.5308	-50.0165	0	0.00976923	0.718339	-0.488622
81	5.33333	220525Well 3	control	6	123.547	72.7438	-50.8034	0	0.00976923	0.710651	-0.496311
82	5.4	220525Well 3	control	6	123.547	68.6826	-54.8646	0	0.00976923	0.670976	-0.535985
83	5.46667	220525Well 3	control	7	123.547	65.0966	-58.4506	0	0.00976923	0.635944	-0.571017
84	5.53333	220525Well 3	control	6	123.547	70.6839	-52.8633	0	0.00976923	0.690528	-0.516434
85	5.6	220525Well 3	control	7	123.547	70.4118	-53.1354	0	0.00976923	0.687869	-0.519092
86	5.66667	220525Well 3	control	6	123.547	65.6311	-57.9161	0	0.00976923	0.641165	-0.565796
87	5.73333	220525Well 3	control	6	123.547	70.2326	-53.3147	0	0.00976923	0.686118	-0.520843
88	5.8	220525Well 3	control	6	123.547	74.7012	-48.846	0	0.00976923	0.729774	-0.477188
89	5.86667	220525Well 3	control	6	123.547	76.737	-46.8102	0	0.00976923	0.749661	-0.4573
90	5.93333	220525Well 3	control	6	123.547	69.3647	-54.1825	0	0.00976923	0.67764	-0.529321
91	6	220525Well 3	control	6	123.547	70.7074	-52.8398	0	0.00976923	0.690757	-0.516204
92	6.06667	220525Well 3	control	7	123.547	72.1525	-51.3947	0	0.00976923	0.704875	-0.502087
93	6.13333	220525Well 3	control	5	123.547	68.9935	-54.5537	0	0.00976923	0.674013	-0.532948
94	6.2	220525Well 3	control	6	123.547	69.5999	-53.9473	0	0.00976923	0.679937	-0.527024
95	6.26667	220525Well 3	control	6	123.547	71.0486	-52.4987	0	0.00976923	0.69409	-0.512871
96	6.33333	220525Well 3	control	7	123.547	68.8699	-54.6773	0	0.00976923	0.672806	-0.534156
97	6.4	220525Well 3	control	6	123.547	64.9066	-58.6406	0	0.00976923	0.634087	-0.572874
98	6.46667	220525Well 3	control	6	123.547	70.229	-53.3182	0	0.00976923	0.686083	-0.520878
99	6.53333	220525Well 3	control	6	123.547	63.4149	-60.1323	0	0.00976923	0.619515	-0.587446
100	6.6	220525Well 3	control	6	123.547	67.5229	-56.0243	0	0.00976923	0.659647	-0.547315
101	6.66667	220525Well 3	control	7	123.547	70.3187	-53.2285	0	0.00976923	0.68696	-0.520002
102	6.73333	220525Well 3	control	5	123.547	73.3458	-50.2014	0	0.00976923	0.716532	-0.49043
103	6.8	220525Well 3	control	7	123.547	69.5372	-54.01	0	0.00976923	0.679325	-0.527636
104	6.86667	220525Well 3	control	8	123.547	58.249	-65.2982	0	0.00976923	0.569048	-0.637914
105	6.93333	220525Well 3	control	5	123.547	75.5799	-47.9673	0	0.00976923	0.738357	-0.468604
106	7	220525Well 3	control	5	123.547	84.7628	-38.7845	0	0.00976923	0.828067	-0.378894
107	7.06667	220525Well 3	control	5	123.547	93.3765	-30.1707	0	0.00976923	0.912216	-0.294745
108	7.13333	220525Well 3	control	6	123.547	88.0913	-35.4559	0	0.00976923	0.860584	-0.346377
109	7.2	220525Well 3	control	6	123.547	97.3886	-26.1586	0	0.00976923	0.951412	-0.255549
110	7.26667	220525Well 3	control	6	123.547	75.5401	-48.0071	0	0.00976923	0.737969	-0.468992
111	7.33333	220525Well 3	control	6	123.547	72.294	-51.2532	0	0.00976923	0.706257	-0.500704
112	7.4	220525Well 3	control	5	123.547	78.0453	-45.5019	0	0.00976923	0.762443	-0.444519
113	7.46667	220525Well 3	control	7	123.547	63.1684	-60.3788	0	0.00976923	0.617107	-0.589854
114	7.53333	220525Well 3	control	6	123.547	59.2507	-64.2965	0	0.00976923	0.578833	-0.628128
115	7.6	220525Well 3	control	6	123.547	67.8596	-55.6876	0	0.00976923	0.662936	-0.544025
116	7.66667	220525Well 3	control	8	123.547	74.0774	-49.4698	0	0.00976923	0.723679	-0.483282
117	7.73333	220525Well 3	control	7	123.547	78.0238	-45.5235	0	0.00976923	0.762232	-0.444729
118	7.8	220525Well 3	control	7	123.547	84.5578	-38.9894	0	0.00976923	0.826065	-0.380896
119	7.86667	220525Well 3	control	7	123.547	73.0962	-50.451	0	0.00976923	0.714094	-0.492868
120	7.93333	220525Well 3	control	6	123.547	66.9641	-56.5831	0	0.00976923	0.654188	-0.552773
121	8	220525Well 3	control	6	123.547	69.8961	-53.6511	0	0.00976923	0.682831	-0.52413
122	8.06667	220525Well 3	control	6	123.547	73.6839	-49.8633	0	0.00976923	0.719835	-0.487126
123	8.13333	220525Well 3	control	6	123.547	79.8746	-43.6726	0	0.00976923	0.780314	-0.426648
124	8.2	220525Well 3	control	6	123.547	81.989	-41.5582	0	0.00976923	0.800969	-0.405992
125	8.26667	220525Well 3	control	7	123.547	86.23	-37.3172	0	0.00976923	0.842401	-0.364561
126	8.33333	220525Well 3	control	6	123.547	91.3378	-32.2094	0	0.00976923	0.8923	-0.314661
127	8.4	220525Well 3	control	6	123.547	80.5199	-43.0273	0	0.00976923	0.786617	-0.420344
128	8.46667	220525Well 3	control	6	123.547	85.5457	-38.0015	0	0.00976923	0.835716	-0.371245
129	8.53333	220525Well 3	control	6	123.547	92.0452	-31.502	0	0.00976923	0.899211	-0.307751
130	8.6	220525Well 3	control	7	123.547	88.9409	-34.6063	0	0.00976923	0.868884	-0.338077
131	8.66667	220525Well 3	control	6	123.547	87.2769	-36.2704	0	0.00976923	0.852628	-0.354333
132	8.73333	220525Well 3	control	7	123.547	90.049	-33.4982	0	0.00976923	0.87971	-0.327252
133	8.8	220525Well 3	control	7	123.547	84.6868	-38.8604	0	0.00976923	0.827325	-0.379637
134	8.86667	220525Well 3	control	7	123.547	84.6161	-38.9311	0	0.00976923	0.826634	-0.380327
135	8.93333	220525Well 3	control	7	123.547	91.3095	-32.2377	0	0.00976923	0.892024	-0.314937
136	9	220525Well 3	control	7	123.547	83.8262	-39.721	0	0.00976923	0.818917	-0.388044
137	9.06667	220525Well 3	control	6	123.547	88.5789	-34.9683	0	0.00976923	0.865347	-0.341614
138	9.13333	220525Well 3	control	7	123.547	74.9143	-48.6329	0	0.00976923	0.731855	-0.475106
139	9.2	220525Well 3	control	8	123.547	74.0341	-49.5131	0	0.00976923	0.723257	-0.483705
140	9.26667	220525Well 3	control	5	123.547	87.996	-35.5512	0	0.00976923	0.859653	-0.347308
141	9.33333	220525Well 3	control	6	123.547	84.1217	-39.4255	0	0.00976923	0.821804	-0.385157
142	9.4	220525Well 3	control	6	123.547	93.2196	-30.3276	0	0.00976923	0.910684	-0.296278
143	9.46667	220525Well 3	control	6	123.547	88.3703	-35.1769	0	0.00976923	0.86331	-0.343652
144	9.53333	220525Well 3	control	6	123.547	90.9505	-32.5967	0	0.00976923	0.888516	-0.318445
145	9.6	220525Well 3	control	6	123.547	95.1537	-28.3935	0	0.00976923	0.929578	-0.277383
146	9.66667	220525Well 3	control	8	123.547	89.2424	-34.3048	0	0.00976923	0.87183	-0.335131
147	9.73333	220525Well 3	control	6	123.547	96.4729	-27.0743	0	0.00976923	0.942466	-0.264495
148	9.8	220525Well 3	control	6	123.547	92.1753	-31.3719	0	0.00976923	0.900482	-0.306479
149	9.86667	220525Well 3	control	6	123.547	88.7429	-34.8044	0	0.00976923	0.866949	-0.340012
150	9.93333	220525Well 3	control	7	123.547	99.9381	-23.6091	0	0.00976923	0.976318	-0.230643
151	10	220525Well 3	control	6	123.547	90.0573	-33.4899	0	0.00976923	0.87979	-0.327171
152	10.0667	220525Well 3	control	6	123.547	80.0055	-43.5418	0	0.00976923	0.781592	-0.42537
153	10.1333	220525Well 3	control	6	123.547	86.0567	-37.4905	0	0.00976923	0.840707	-0.366254
154	10.2	220525Well 3	control	6	123.547	86.8284	-36.7188	0	0.00976923	0.848247	-0.358714
155	10.2667	220525Well 3	control	7	123.547	97.3505	-26.1967	0	0.00976923	0.95104	-0.255922
156	10.3333	220525Well 3	control	7	123.547	96.7311	-26.8161	0	0.00976923	0.944988	-0.261973
157	10.4	220525Well 3	control	6	123.547	114.079	-9.46827	0	0.00976923	1.11446	-0.0924977
158	10.4667	220525Well 3	control	8	123.547	93.9575	-29.5897	0	0.00976923	0.917893	-0.289069
159	10.5333	220525Well 3	control	6	123.547	99.5489	-23.9983	0	0.00976923	0.972516	-0.234445
160	10.6	220525Well 3	control	6	123.547	99.3491	-24.1981	0	0.00976923	0.970564	-0.236397
161	10.6667	220525Well 3	control	6	123.547	104.387	-19.1598	0	0.00976923	1.01978	-0.187177
162	10.7333	220525Well 3	control	6	123.547	104.57	-18.9775	0	0.00976923	1.02157	-0.185396
163	10.8	220525Well 3	control	7	123.547	94.7885	-28.7587	0	0.00976923	0.926011	-0.28095
164	10.8667	220525Well 3	control	9	123.547	85.5613	-37.9859	0	0.00976923	0.835868	-0.371093
165	10.9333	220525Well 3	control	7	123.547	106.13	-17.4171	0	0.00976923	1.03681	-0.170151
166	11	220525Well 3	control	6	123.547	103.554	-19.9932	0	0.00976923	1.01164	-0.195318
167	11.0667	220525Well 3	control	6	123.547	101.913	-21.6343	0	0.00976923	0.995611	-0.21135
168	11.1333	220525Well 3	control	5	123.547	91.8151	-31.7321	0	0.00976923	0.896963	-0.309998
169	11.2	220525Well 3	control	6	123.547	96.4579	-27.0894	0	0.00976923	0.942319	-0.264642
170	11.2667	220525Well 3	control	6	123.547	104.13	-19.4172	0	0.00976923	1.01727	-0.189691
171	11.3333	220525Well 3	control	7	123.547	112.881	-10.6665	0	0.00976923	1.10276	-0.104204
172	11.4	220525Well 3	control	8	123.547	101.466	-22.0809	0	0.00976923	0.991248	-0.215713
173	11.4667	220525Well 3	control	6	123.547	110.146	-13.4015	0	0.00976923	1.07604	-0.130922
174	11.5333	220525Well 3	control	6	123.547	104.219	-19.3284	0	0.00976923	1.01814	-0.188824
175	11.6	220525Well 3	control	6	123.547	102.563	-20.9839	0	0.00976923	1.00196	-0.204996
176	11.6667	220525Well 3	control	6	123.547	113.437	-10.11	0	0.00976923	1.10819	-0.0987665
177	11.7333	220525Well 3	control	6	123.547	100.798	-22.7496	0	0.00976923	0.984716	-0.222246
178	11.8	220525Well 3	control	6	123.547	91.2053	-32.3419	0	0.00976923	0.891006	-0.315955
179	11.8667	220525Well 3	control	6	123.547	97.9116	-25.6356	0	0.00976923	0.956521	-0.250441
180	11.9333	220525Well 3	control	7	123.547	72.3451	-51.2021	0	0.00976923	0.706756	-0.500205
181	12	220525Well 3	control	7	123.547	69.993	-53.5542	0	0.00976923	0.683778	-0.523183
182	12.0667	220525Well 3	control	7	123.547	74.5383	-49.0089	0	0.00976923	0.728182	-0.478779
183	12.1333	220525Well 3	control	6	123.547	160	36.4527	1	0.00976923	1.56308	0.356114
184	12.2	220525Well 3	control	6	123.547	117.377	-6.16994	0	0.00976923	1.14669	-0.0602755
185	12.2667	220525Well 3	control	9	123.547	102.81	-20.7368	0	0.00976923	1.00438	-0.202582
186	12.3333	220525Well 3	control	6	123.547	91.4723	-32.0749	0	0.00976923	0.893614	-0.313347
187	12.4	220525Well 3	control	6	123.547	62.0535	-61.4937	0	0.00976923	0.606215	-0.600746
188	12.4667	220525Well 3	control	6	123.547	69.0401	-54.5071	0	0.00976923	0.674469	-0.532493
189	12.5333	220525Well 3	control	8	123.547	71.1824	-52.3648	0	0.00976923	0.695397	-0.511564
190	12.6	220525Well 3	control	7	123.547	68.1133	-55.4339	0	0.00976923	0.665414	-0.541547
191	12.6667	220525Well 3	control	6	123.547	99.8321	-23.7151	0	0.00976923	0.975283	-0.231678
192	12.7333	220525Well 3	control	6	123.547	93.917	-29.6302	0	0.00976923	0.917497	-0.289464
193	12.8	220525Well 3	control	6	123.547	103.841	-19.7058	0	0.00976923	1.01445	-0.19251
194	12.8667	220525Well 3	control	5	123.547	87.1749	-36.3723	0	0.00976923	0.851632	-0.355329
195	12.9333	220525Well 3	control	9	123.547	96.1333	-27.4139	0	0.00976923	0.939148	-0.267813
196	13	220525Well 3	control	6	123.547	81.3926	-42.1546	0	0.00976923	0.795143	-0.411818
197	13.0667	220525Well 3	control	6	123.547	84.9808	-38.5664	0	0.00976923	0.830197	-0.376764
198	13.1333	220525Well 3	control	7	123.547	85.5793	-37.9679	0	0.00976923	0.836044	-0.370917
199	13.2	220525Well 3	control	6	123.547	85.9242	-37.623	0	0.00976923	0.839413	-0.367548
200	13.2667	220525Well 3	control	6	123.547	81.6609	-41.8863	0	0.00976923	0.797764	-0.409197
201	13.3333	220525Well 3	control	6	123.547	102.906	-20.6408	0	0.00976923	1.00532	-0.201645
202	13.4	220525Well 3	control	5	123.547	152.692	29.1448	1	0.00976923	1.49168	0.284722
203	13.4667	220525Well 3	control	7	123.547	92.2833	-31.2639	0	0.00976923	0.901537	-0.305424
204	13.5333	220525Well 3	control	6	123.547	101.523	-22.0247	0	0.00976923	0.991797	-0.215164
205	13.6	220525Well 3	control	6	123.547	94.052	-29.4952	0	0.00976923	0.918816	-0.288146
206	13.6667	220525Well 3	control	7	123.547	80.8491	-42.6981	0	0.00976923	0.789833	-0.417128
207	13.7333	220525Well 3	control	6	123.547	110.318	-13.2287	0	0.00976923	1.07773	-0.129235
208	13.8	220525Well 3	control	7	123.547	108.52	-15.0277	0	0.00976923	1.06015	-0.146809
209	13.8667	220525Well 3	control	6	123.547	105.725	-17.8224	0	0.00976923	1.03285	-0.174111
210	13.9333	220525Well 3	control	7	123.547	82.2802	-41.267	0	0.00976923	0.803814	-0.403147
211	14	220525Well 3	control	6	123.547	95.6341	-27.9131	0	0.00976923	0.934272	-0.272689
212	14.0667	220525Well 3	control	8	123.547	89.5779	-33.9693	0	0.00976923	0.875107	-0.331854
213	14.1333	220525Well 3	control	6	123.547	88.9046	-34.6427	0	0.00976923	0.868529	-0.338432
214	14.2	220525Well 3	control	6	123.547	81.8713	-41.6759	0	0.00976923	0.79982	-0.407141
215	14.2667	220525Well 3	control	6	123.547	97.6229	-25.9243	0	0.00976923	0.953701	-0.253261
216	14.3333	220525Well 3	control	6	123.547	86.5171	-37.0301	0	0.00976923	0.845205	-0.361756
217	14.4	220525Well 3	control	7	123.547	90.3102	-33.237	0	0.00976923	0.882261	-0.3247
218	14.4667	220525Well 3	control	6	123.547	108.606	-14.9411	0	0.00976923	1.061	-0.145963
219	14.5333	220525Well 3	control	5	123.547	101.598	-21.9492	0	0.00976923	0.992534	-0.214427
220	14.6	220525Well 3	control	6	123.547	103.346	-20.2011	0	0.00976923	1.00961	-0.197349
221	14.6667	220525Well 3	control	6	123.547	89.8172	-33.73	0	0.00976923	0.877445	-0.329516
222	14.7333	220525Well 3	control	6	123.547	92.2743	-31.2729	0	0.00976923	0.901449	-0.305512
223	14.8	220525Well 3	control	6	123.547	116.533	-7.01459	0	0.00976923	1.13843	-0.0685272
224	14.8667	220525Well 3	control	6	123.547	111.49	-12.0573	0	0.00976923	1.08917	-0.11779
225	14.9333	220525Well 3	control	6	123.547	106.42	-17.1268	0	0.00976923	1.03965	-0.167315
226	15	220525Well 3	control	7	123.547	97.6695	-25.8777	0	0.00976923	0.954156	-0.252805
227	15.0667	220525Well 3	control	6	123.547	118.632	-4.91477	0	0.00976923	1.15895	-0.0480135
228	15.1333	220525Well 3	control	6	123.547	88.6307	-34.9165	0	0.00976923	0.865854	-0.341108
229	15.2	220525Well 3	control	6	123.547	82.2493	-41.2979	0	0.00976923	0.803513	-0.403449
230	15.2667	220525Well 3	control	6	123.547	104.937	-18.6101	0	0.00976923	1.02515	-0.181807
231	15.3333	220525Well 3	control	6	123.547	118.627	-4.92067	0	0.00976923	1.15889	-0.0480711
232	15.4	220525Well 3	control	6	123.547	115.176	-8.3711	0	0.00976923	1.12518	-0.0817792
233	15.4667	220525Well 3	control	6	123.547	88.0443	-35.5029	0	0.00976923	0.860125	-0.346836
234	15.5333	220525Well 3	control	6	123.547	103.357	-20.1901	0	0.00976923	1.00972	-0.197242
235	15.6	220525Well 3	control	6	123.547	109.215	-14.3326	0	0.00976923	1.06694	-0.140018
236	15.6667	220525Well 3	control	6	123.547	105.782	-17.7653	0	0.00976923	1.03341	-0.173553
237	15.7333	220525Well 3	control	6	123.547	115.107	-8.44009	0	0.00976923	1.12451	-0.0824532
238	15.8	220525Well 3	control	6	123.547	114.183	-9.36454	0	0.00976923	1.11548	-0.0914843
239	15.8667	220525Well 3	control	5	123.547	95.7605	-27.7867	0	0.00976923	0.935506	-0.271455
240	15.9333	220525Well 3	control	5	123.547	91.6008	-31.9464	0	0.00976923	0.894869	-0.312092
241	16	220525Well 3	control	5	123.547	87.7392	-35.808	0	0.00976923	0.857145	-0.349816
242	16.0667	220525Well 3	control	6	123.547	87.6908	-35.8564	0	0.00976923	0.856672	-0.35029
243	16.1333	220525Well 3	control	8	123.547	89.9654	-33.5818	0	0.00976923	0.878893	-0.328068
244	16.2	220525Well 3	control	6	123.547	63.8614	-59.6859	0	0.00976923	0.623876	-0.583085
245	16.2667	220525Well 3	control	9	123.547	75.1469	-48.4003	0	0.00976923	0.734127	-0.472834
246	16.3333	220525Well 3	control	6	123.547	122.836	-0.710998	0	0.00976923	1.20002	-0.00694591
247	16.4	220525Well 3	control	6	123.547	105.664	-17.8827	0	0.00976923	1.03226	-0.174701
248	16.4667	220525Well 3	control	5	123.547	96.7586	-26.7886	0	0.00976923	0.945257	-0.261704
249	16.5333	220525Well 3	control	6	123.547	94.9798	-28.5674	0	0.00976923	0.92788	-0.279081
250	16.6	220525Well 3	control	6	123.547	94.8042	-28.743	0	0.00976923	0.926165	-0.280797
251	16.6667	220525Well 3	control	6	123.547	105.377	-18.17	0	0.00976923	1.02945	-0.177507
252	16.7333	220525Well 3	control	6	123.547	135.914	12.3672	1	0.00976923	1.32778	0.120818
253	16.8	220525Well 3	control	6	123.547	104.664	-18.8837	0	0.00976923	1.02248	-0.184479
254	16.8667	220525Well 3	control	6	123.547	160.859	37.3122	1	0.00976923	1.57147	0.364511
255	16.9333	220525Well 3	control	6	123.547	121.433	-2.11468	0	0.00976923	1.1863	-0.0206588
256	17	220525Well 3	control	8	123.547	100.912	-22.6348	0	0.00976923	0.985837	-0.221124
257	17.0667	220525Well 3	control	7	123.547	96.2025	-27.3447	0	0.00976923	0.939824	-0.267137
258	17.1333	220525Well 3	control	7	123.547	102.089	-21.4585	0	0.00976923	0.997328	-0.209633
259	17.2	220525Well 3	control	6	123.547	95.0459	-28.5013	0	0.00976923	0.928525	-0.278436
260	17.2667	220525Well 3	control	6	123.547	118.556	-4.99129	0	0.00976923	1.1582	-0.0487611
261	17.3333	220525Well 3	control	5	123.547	111.268	-12.2788	0	0.00976923	1.08701	-0.119954
262	17.4	220525Well 3	control	6	123.547	115.684	-7.86301	0	0.00976923	1.13015	-0.0768156
263	17.4667	220525Well 3	control	6	123.547	112.349	-11.198	0	0.00976923	1.09757	-0.109396
264	17.5333	220525Well 3	control	6	123.547	89.9627	-33.5845	0	0.00976923	0.878866	-0.328095
265	17.6	220525Well 3	control	6	123.547	108.435	-15.1123	0	0.00976923	1.05933	-0.147636
266	17.6667	220525Well 3	control	6	123.547	82.1459	-41.4013	0	0.00976923	0.802502	-0.404459
267	17.7333	220525Well 3	control	6	123.547	107.111	-16.4365	0	0.00976923	1.04639	-0.160572
268	17.8	220525Well 3	control	6	123.547	108.127	-15.4201	0	0.00976923	1.05632	-0.150643
269	17.8667	220525Well 3	control	7	123.547	89.5948	-33.9524	0	0.00976923	0.875272	-0.331689
270	17.9333	220525Well 3	control	7	123.547	86.8513	-36.6959	0	0.00976923	0.848471	-0.358491
271	18	220525Well 3	control	6	123.547	68.8228	-54.7244	0	0.00976923	0.672346	-0.534616
272	18.0667	220525Well 3	control	6	123.547	93.4479	-30.0993	0	0.00976923	0.912914	-0.294047
273	18.1333	220525Well 3	control	6	123.547	86.634	-36.9132	0	0.00976923	0.846348	-0.360613
274	18.2	220525Well 3	control	6	123.547	85.5534	-37.9938	0	0.00976923	0.835791	-0.37117
275	18.2667	220525Well 3	control	6	123.547	79.2111	-44.3361	0	0.00976923	0.773832	-0.433129
276	18.3333	220525Well 3	control	6	123.547	89.1472	-34.4001	0	0.00976923	0.870899	-0.336062
277	18.4	220525Well 3	control	6	123.547	89.8501	-33.6971	0	0.00976923	0.877766	-0.329195
278	18.4667	220525Well 3	control	6	123.547	122.657	-0.890356	0	0.00976923	1.19826	-0.00869809
279	18.5333	220525Well 3	control	6	123.547	142.512	18.9648	1	0.00976923	1.39223	0.185272
280	18.6	220525Well 3	control	7	123.547	103.432	-20.1156	0	0.00976923	1.01045	-0.196514
281	18.6667	220525Well 3	control	6	123.547	133.756	10.209	1	0.00976923	1.30669	0.0997337
282	18.7333	220525Well 3	control	6	123.547	94.9035	-28.6438	0	0.00976923	0.927134	-0.279827
283	18.8	220525Well 3	control	8	123.547	86.5013	-37.0459	0	0.00976923	0.845051	-0.36191
284	18.8667	220525Well 3	control	6	123.547	93.5797	-29.9676	0	0.00976923	0.914201	-0.29276
285	18.9333	220525Well 3	control	6	123.547	133.341	9.79334	1	0.00976923	1.30263	0.0956734
286	19	220525Well 3	control	5	123.547	103.733	-19.814	0	0.00976923	1.01339	-0.193567
287	19.0667	220525Well 3	control	7	123.547	119.368	-4.17955	0	0.00976923	1.16613	-0.0408309
288	19.1333	220525Well 3	control	6	123.547	121.321	-2.22634	0	0.00976923	1.18521	-0.0217497
289	19.2	220525Well 3	control	6	123.547	104.716	-18.8316	0	0.00976923	1.02299	-0.18397
290	19.2667	220525Well 3	control	6	123.547	97.5565	-25.9908	0	0.00976923	0.953052	-0.25391
291	19.3333	220525Well 3	control	7	123.547	102.16	-21.3874	0	0.00976923	0.998023	-0.208938
292	19.4	220525Well 3	control	6	123.547	113.43	-10.1172	0	0.00976923	1.10812	-0.0988374
293	19.4667	220525Well 3	control	6	123.547	107.589	-15.9586	0	0.00976923	1.05106	-0.155903
294	19.5333	220525Well 3	control	6	123.547	115.93	-7.61759	0	0.00976923	1.13254	-0.074418
295	19.6	220525Well 3	control	6	123.547	116.122	-7.42511	0	0.00976923	1.13442	-0.0725376
296	19.6667	220525Well 3	control	6	123.547	121.645	-1.90186	0	0.00976923	1.18838	-0.0185798
297	19.7333	220525Well 3	control	6	123.547	114.064	-9.48282	0	0.00976923	1.11432	-0.0926399
298	19.8	220525Well 3	control	6	123.547	106.197	-17.3506	0	0.00976923	1.03746	-0.169502
299	19.8667	220525Well 3	control	6	123.547	128.674	5.12652	1	0.00976923	1.25704	0.0500822
300	19.9333	220525Well 3	control	6	123.547	130.322	6.77482	1	0.00976923	1.27315	0.0661848
301	20	220525Well 3	control	6	123.547	165.026	41.4788	1	0.00976923	1.61218	0.405216
1	0	220525Well 4	predator	3	144.026	118.267	-25.7594	0	0.00976923	1.15538	-0.251649
2	0.0666667	220525Well 4	predator	3	144.026	112.934	-31.0928	0	0.00976923	1.10327	-0.303753
3	0.133333	220525Well 4	predator	3	144.026	93.9111	-50.1153	0	0.00976923	0.91744	-0.489588
4	0.2	220525Well 4	predator	3	144.026	98.8864	-45.1401	0	0.00976923	0.966044	-0.440984
5	0.266667	220525Well 4	predator	3	144.026	123.282	-20.7449	0	0.00976923	1.20437	-0.202662
6	0.333333	220525Well 4	predator	3	144.026	131.315	-12.7116	0	0.00976923	1.28284	-0.124183
7	0.4	220525Well 4	predator	3	144.026	128.023	-16.0033	0	0.00976923	1.25069	-0.15634
8	0.466667	220525Well 4	predator	3	144.026	136.01	-8.01628	0	0.00976923	1.32871	-0.0783129
9	0.533333	220525Well 4	predator	3	144.026	133.459	-10.567	0	0.00976923	1.3038	-0.103231
10	0.6	220525Well 4	predator	3	144.026	126.646	-17.3801	0	0.00976923	1.23724	-0.169791
11	0.666667	220525Well 4	predator	3	144.026	135.405	-8.62142	0	0.00976923	1.3228	-0.0842246
12	0.733333	220525Well 4	predator	3	144.026	130.302	-13.7241	0	0.00976923	1.27295	-0.134074
13	0.8	220525Well 4	predator	3	144.026	133.881	-10.1452	0	0.00976923	1.30792	-0.0991112
14	0.866667	220525Well 4	predator	3	144.026	131.234	-12.7928	0	0.00976923	1.28205	-0.124976
15	0.933333	220525Well 4	predator	3	144.026	124.103	-19.9231	0	0.00976923	1.21239	-0.194633
16	1	220525Well 4	predator	3	144.026	121.468	-22.5586	0	0.00976923	1.18665	-0.22038
17	1.06667	220525Well 4	predator	3	144.026	115.98	-28.0467	0	0.00976923	1.13303	-0.273995
18	1.13333	220525Well 4	predator	4	144.026	110.114	-33.9122	0	0.00976923	1.07573	-0.331296
19	1.2	220525Well 4	predator	4	144.026	110.646	-33.3809	0	0.00976923	1.08092	-0.326106
20	1.26667	220525Well 4	predator	3	144.026	121.996	-22.0303	0	0.00976923	1.19181	-0.215219
21	1.33333	220525Well 4	predator	3	144.026	114.104	-29.9224	0	0.00976923	1.11471	-0.292319
22	1.4	220525Well 4	predator	3	144.026	117.377	-26.6491	0	0.00976923	1.14669	-0.260341
23	1.46667	220525Well 4	predator	3	144.026	112.036	-31.9901	0	0.00976923	1.09451	-0.312519
24	1.53333	220525Well 4	predator	3	144.026	112.654	-31.3721	0	0.00976923	1.10055	-0.306481
25	1.6	220525Well 4	predator	3	144.026	111.895	-32.1319	0	0.00976923	1.09312	-0.313904
26	1.66667	220525Well 4	predator	3	144.026	115.508	-28.518	0	0.00976923	1.12843	-0.278599
27	1.73333	220525Well 4	predator	3	144.026	117.18	-26.8466	0	0.00976923	1.14476	-0.262271
28	1.8	220525Well 4	predator	3	144.026	114.542	-29.484	0	0.00976923	1.11899	-0.288036
29	1.86667	220525Well 4	predator	3	144.026	116.572	-27.4541	0	0.00976923	1.13882	-0.268205
30	1.93333	220525Well 4	predator	3	144.026	123.377	-20.6496	0	0.00976923	1.2053	-0.201731
31	2	220525Well 4	predator	3	144.026	120.103	-23.9235	0	0.00976923	1.17331	-0.233714
32	2.06667	220525Well 4	predator	3	144.026	110.872	-33.1543	0	0.00976923	1.08314	-0.323892
33	2.13333	220525Well 4	predator	3	144.026	118.701	-25.3252	0	0.00976923	1.15962	-0.247407
34	2.2	220525Well 4	predator	3	144.026	126.082	-17.9447	0	0.00976923	1.23172	-0.175306
35	2.26667	220525Well 4	predator	3	144.026	121.698	-22.3284	0	0.00976923	1.1889	-0.218132
36	2.33333	220525Well 4	predator	3	144.026	117.007	-27.0199	0	0.00976923	1.14306	-0.263964
37	2.4	220525Well 4	predator	3	144.026	137.835	-6.19137	0	0.00976923	1.34654	-0.060485
38	2.46667	220525Well 4	predator	3	144.026	149.871	5.84419	1	0.00976923	1.46412	0.0570932
39	2.53333	220525Well 4	predator	3	144.026	150.876	6.84918	1	0.00976923	1.47394	0.0669112
40	2.6	220525Well 4	predator	3	144.026	141.543	-2.48311	0	0.00976923	1.38277	-0.0242581
41	2.66667	220525Well 4	predator	3	144.026	136.993	-7.03369	0	0.00976923	1.33831	-0.0687138
42	2.73333	220525Well 4	predator	3	144.026	123.807	-20.2193	0	0.00976923	1.2095	-0.197527
43	2.8	220525Well 4	predator	3	144.026	119.062	-24.9649	0	0.00976923	1.16314	-0.243888
44	2.86667	220525Well 4	predator	3	144.026	118.659	-25.3674	0	0.00976923	1.15921	-0.24782
45	2.93333	220525Well 4	predator	3	144.026	127.038	-16.988	0	0.00976923	1.24107	-0.165959
46	3	220525Well 4	predator	3	144.026	128.155	-15.8712	0	0.00976923	1.25198	-0.155049
47	3.06667	220525Well 4	predator	2	144.026	132.877	-11.1499	0	0.00976923	1.2981	-0.108926
48	3.13333	220525Well 4	predator	2	144.026	120.589	-23.4372	0	0.00976923	1.17806	-0.228964
49	3.2	220525Well 4	predator	3	144.026	121.958	-22.0684	0	0.00976923	1.19144	-0.215591
50	3.26667	220525Well 4	predator	2	144.026	133.012	-11.014	0	0.00976923	1.29943	-0.107598
51	3.33333	220525Well 4	predator	3	144.026	126.757	-17.2699	0	0.00976923	1.23831	-0.168714
52	3.4	220525Well 4	predator	2	144.026	134.893	-9.13378	0	0.00976923	1.3178	-0.08923
53	3.46667	220525Well 4	predator	2	144.026	139.562	-4.46418	0	0.00976923	1.36342	-0.0436116
54	3.53333	220525Well 4	predator	2	144.026	138.977	-5.04977	0	0.00976923	1.3577	-0.0493323
55	3.6	220525Well 4	predator	4	144.026	121.085	-22.9417	0	0.00976923	1.18291	-0.224122
56	3.66667	220525Well 4	predator	3	144.026	121.088	-22.9386	0	0.00976923	1.18294	-0.224092
57	3.73333	220525Well 4	predator	3	144.026	121.462	-22.5646	0	0.00976923	1.18659	-0.220439
58	3.8	220525Well 4	predator	3	144.026	114.726	-29.3002	0	0.00976923	1.12079	-0.28624
59	3.86667	220525Well 4	predator	3	144.026	121.445	-22.5818	0	0.00976923	1.18642	-0.220607
60	3.93333	220525Well 4	predator	3	144.026	113.961	-30.0651	0	0.00976923	1.11332	-0.293712
61	4	220525Well 4	predator	3	144.026	115.33	-28.6963	0	0.00976923	1.12669	-0.280341
62	4.06667	220525Well 4	predator	2	144.026	118.895	-25.1314	0	0.00976923	1.16151	-0.245514
63	4.13333	220525Well 4	predator	3	144.026	117.977	-26.0498	0	0.00976923	1.15254	-0.254486
64	4.2	220525Well 4	predator	2	144.026	120.297	-23.7299	0	0.00976923	1.1752	-0.231823
65	4.26667	220525Well 4	predator	3	144.026	119.631	-24.3958	0	0.00976923	1.1687	-0.238328
66	4.33333	220525Well 4	predator	3	144.026	123.199	-20.8276	0	0.00976923	1.20356	-0.20347
67	4.4	220525Well 4	predator	3	144.026	124.752	-19.274	0	0.00976923	1.21874	-0.188292
68	4.46667	220525Well 4	predator	3	144.026	118.035	-25.9919	0	0.00976923	1.15311	-0.253921
69	4.53333	220525Well 4	predator	4	144.026	107.028	-36.9986	0	0.00976923	1.04558	-0.361448
70	4.6	220525Well 4	predator	3	144.026	130.239	-13.7871	0	0.00976923	1.27234	-0.13469
71	4.66667	220525Well 4	predator	3	144.026	152.957	8.93064	1	0.00976923	1.49427	0.0872455
72	4.73333	220525Well 4	predator	3	144.026	138.552	-5.47432	0	0.00976923	1.35355	-0.0534798
73	4.8	220525Well 4	predator	3	144.026	132.716	-11.3107	0	0.00976923	1.29653	-0.110497
74	4.86667	220525Well 4	predator	3	144.026	138.454	-5.57268	0	0.00976923	1.35259	-0.0544408
75	4.93333	220525Well 4	predator	3	144.026	125.036	-18.9905	0	0.00976923	1.2215	-0.185523
76	5	220525Well 4	predator	3	144.026	123.065	-20.9618	0	0.00976923	1.20225	-0.20478
77	5.06667	220525Well 4	predator	3	144.026	117.182	-26.8449	0	0.00976923	1.14477	-0.262254
78	5.13333	220525Well 4	predator	3	144.026	164.593	20.5666	1	0.00976923	1.60795	0.20092
79	5.2	220525Well 4	predator	3	144.026	144.42	0.393903	1	0.00976923	1.41088	0.00384813
80	5.26667	220525Well 4	predator	3	144.026	140.262	-3.76443	0	0.00976923	1.37025	-0.0367756
81	5.33333	220525Well 4	predator	3	144.026	157.228	13.202	1	0.00976923	1.536	0.128974
82	5.4	220525Well 4	predator	3	144.026	152.082	8.05603	1	0.00976923	1.48573	0.0787012
83	5.46667	220525Well 4	predator	3	144.026	150.317	6.29027	1	0.00976923	1.46848	0.0614511
84	5.53333	220525Well 4	predator	3	144.026	176.624	32.5974	1	0.00976923	1.72548	0.318451
85	5.6	220525Well 4	predator	3	144.026	158.356	14.3294	1	0.00976923	1.54702	0.139987
86	5.66667	220525Well 4	predator	3	144.026	173.99	29.9637	1	0.00976923	1.69975	0.292723
87	5.73333	220525Well 4	predator	3	144.026	152.603	8.57647	1	0.00976923	1.49081	0.0837855
88	5.8	220525Well 4	predator	3	144.026	147.398	3.37196	1	0.00976923	1.43997	0.0329414
89	5.86667	220525Well 4	predator	3	144.026	151.528	7.50132	1	0.00976923	1.48031	0.0732821
90	5.93333	220525Well 4	predator	3	144.026	152.716	8.68931	1	0.00976923	1.49192	0.0848879
91	6	220525Well 4	predator	3	144.026	157.507	13.4801	1	0.00976923	1.53872	0.13169
92	6.06667	220525Well 4	predator	3	144.026	153.379	9.35295	1	0.00976923	1.4984	0.0913711
93	6.13333	220525Well 4	predator	3	144.026	162.493	18.4662	1	0.00976923	1.58743	0.1804
94	6.2	220525Well 4	predator	3	144.026	163.151	19.1248	1	0.00976923	1.59386	0.186835
95	6.26667	220525Well 4	predator	3	144.026	145.039	1.01253	1	0.00976923	1.41692	0.0098916
96	6.33333	220525Well 4	predator	3	144.026	138.766	-5.26092	0	0.00976923	1.35563	-0.0513952
97	6.4	220525Well 4	predator	3	144.026	167.679	23.653	1	0.00976923	1.6381	0.231071
98	6.46667	220525Well 4	predator	3	144.026	152.507	8.48032	1	0.00976923	1.48987	0.0828462
99	6.53333	220525Well 4	predator	3	144.026	139.413	-4.61382	0	0.00976923	1.36195	-0.0450735
100	6.6	220525Well 4	predator	3	144.026	131.745	-12.2812	0	0.00976923	1.28705	-0.119977
101	6.66667	220525Well 4	predator	3	144.026	121.874	-22.1525	0	0.00976923	1.19062	-0.216412
102	6.73333	220525Well 4	predator	3	144.026	122.69	-21.336	0	0.00976923	1.19859	-0.208437
103	6.8	220525Well 4	predator	3	144.026	130.217	-13.8092	0	0.00976923	1.27212	-0.134905
104	6.86667	220525Well 4	predator	3	144.026	117.494	-26.5322	0	0.00976923	1.14783	-0.259199
105	6.93333	220525Well 4	predator	3	144.026	138.623	-5.40381	0	0.00976923	1.35424	-0.0527911
106	7	220525Well 4	predator	3	144.026	143.476	-0.550668	0	0.00976923	1.40165	-0.0053796
107	7.06667	220525Well 4	predator	3	144.026	171.083	27.0562	1	0.00976923	1.67135	0.264318
108	7.13333	220525Well 4	predator	3	144.026	164.963	20.9366	1	0.00976923	1.61156	0.204535
109	7.2	220525Well 4	predator	3	144.026	162.983	18.9569	1	0.00976923	1.59222	0.185194
110	7.26667	220525Well 4	predator	3	144.026	153.879	9.85233	1	0.00976923	1.50328	0.0962497
111	7.33333	220525Well 4	predator	3	144.026	166.441	22.4141	1	0.00976923	1.626	0.218968
112	7.4	220525Well 4	predator	3	144.026	160.612	16.5858	1	0.00976923	1.56906	0.16203
113	7.46667	220525Well 4	predator	3	144.026	164.407	20.3809	1	0.00976923	1.60613	0.199106
114	7.53333	220525Well 4	predator	3	144.026	160.447	16.4207	1	0.00976923	1.56745	0.160418
115	7.6	220525Well 4	predator	3	144.026	156.265	12.2384	1	0.00976923	1.52659	0.11956
116	7.66667	220525Well 4	predator	3	144.026	161.018	16.9917	1	0.00976923	1.57302	0.165995
117	7.73333	220525Well 4	predator	3	144.026	186.283	42.2566	1	0.00976923	1.81984	0.412815
118	7.8	220525Well 4	predator	3	144.026	191.75	47.7238	1	0.00976923	1.87325	0.466224
119	7.86667	220525Well 4	predator	3	144.026	197.571	53.5444	1	0.00976923	1.93011	0.523087
120	7.93333	220525Well 4	predator	3	144.026	195.723	51.6963	1	0.00976923	1.91206	0.505033
121	8	220525Well 4	predator	3	144.026	193.176	49.1495	1	0.00976923	1.88718	0.480153
122	8.06667	220525Well 4	predator	3	144.026	208.405	64.3786	1	0.00976923	2.03596	0.628929
123	8.13333	220525Well 4	predator	3	144.026	182.719	38.6926	1	0.00976923	1.78502	0.377997
124	8.2	220525Well 4	predator	3	144.026	160.515	16.4887	1	0.00976923	1.56811	0.161082
125	8.26667	220525Well 4	predator	3	144.026	153.471	9.44428	1	0.00976923	1.49929	0.0922634
126	8.33333	220525Well 4	predator	3	144.026	155.894	11.8674	1	0.00976923	1.52296	0.115936
127	8.4	220525Well 4	predator	2	144.026	123.506	-20.52	0	0.00976923	1.20656	-0.200465
128	8.46667	220525Well 4	predator	3	144.026	162.895	18.8683	1	0.00976923	1.59136	0.184329
129	8.53333	220525Well 4	predator	3	144.026	167.956	23.9295	1	0.00976923	1.6408	0.233772
130	8.6	220525Well 4	predator	3	144.026	182.998	38.9716	1	0.00976923	1.78775	0.380722
131	8.66667	220525Well 4	predator	3	144.026	157.024	12.9973	1	0.00976923	1.534	0.126973
132	8.73333	220525Well 4	predator	3	144.026	157.571	13.5446	1	0.00976923	1.53935	0.132321
133	8.8	220525Well 4	predator	3	144.026	171.732	27.7058	1	0.00976923	1.67769	0.270664
134	8.86667	220525Well 4	predator	3	144.026	158.463	14.4365	1	0.00976923	1.54806	0.141033
135	8.93333	220525Well 4	predator	3	144.026	155.703	11.6768	1	0.00976923	1.5211	0.114074
136	9	220525Well 4	predator	3	144.026	149.386	5.35986	1	0.00976923	1.45939	0.0523617
137	9.06667	220525Well 4	predator	3	144.026	160.331	16.3044	1	0.00976923	1.56631	0.159282
138	9.13333	220525Well 4	predator	3	144.026	170.148	26.1217	1	0.00976923	1.66222	0.255189
139	9.2	220525Well 4	predator	3	144.026	163.356	19.3299	1	0.00976923	1.59587	0.188838
140	9.26667	220525Well 4	predator	3	144.026	223.414	79.3876	1	0.00976923	2.18258	0.775556
141	9.33333	220525Well 4	predator	3	144.026	227.267	83.2408	1	0.00976923	2.22023	0.813199
142	9.4	220525Well 4	predator	2	144.026	200.994	56.9671	1	0.00976923	1.96355	0.556524
143	9.46667	220525Well 4	predator	3	144.026	210.759	66.7324	1	0.00976923	2.05895	0.651924
144	9.53333	220525Well 4	predator	3	144.026	198.432	54.406	1	0.00976923	1.93853	0.531505
145	9.6	220525Well 4	predator	3	144.026	193.646	49.6192	1	0.00976923	1.89177	0.484741
146	9.66667	220525Well 4	predator	3	144.026	241.41	97.3831	1	0.00976923	2.35839	0.951358
147	9.73333	220525Well 4	predator	3	144.026	200.248	56.2216	1	0.00976923	1.95627	0.549242
148	9.8	220525Well 4	predator	3	144.026	180.651	36.6248	1	0.00976923	1.76482	0.357796
149	9.86667	220525Well 4	predator	3	144.026	175.064	31.0377	1	0.00976923	1.71024	0.303214
150	9.93333	220525Well 4	predator	3	144.026	204.22	60.1938	1	0.00976923	1.99507	0.588047
151	10	220525Well 4	predator	3	144.026	248.833	104.807	1	0.00976923	2.43091	1.02388
152	10.0667	220525Well 4	predator	3	144.026	227.049	83.0223	1	0.00976923	2.21809	0.811064
153	10.1333	220525Well 4	predator	3	144.026	236.708	92.6814	1	0.00976923	2.31245	0.905426
154	10.2	220525Well 4	predator	3	144.026	208.57	64.5438	1	0.00976923	2.03757	0.630543
155	10.2667	220525Well 4	predator	3	144.026	231.031	87.0046	1	0.00976923	2.257	0.849968
156	10.3333	220525Well 4	predator	3	144.026	233.415	89.3888	1	0.00976923	2.28029	0.87326
157	10.4	220525Well 4	predator	3	144.026	221.664	77.6376	1	0.00976923	2.16549	0.75846
158	10.4667	220525Well 4	predator	3	144.026	208.454	64.4278	1	0.00976923	2.03644	0.62941
159	10.5333	220525Well 4	predator	3	144.026	180.896	36.8693	1	0.00976923	1.76721	0.360185
160	10.6	220525Well 4	predator	3	144.026	178.281	34.2544	1	0.00976923	1.74167	0.334639
161	10.6667	220525Well 4	predator	3	144.026	225.258	81.2318	1	0.00976923	2.2006	0.793572
162	10.7333	220525Well 4	predator	3	144.026	206.704	62.6777	1	0.00976923	2.01934	0.612313
163	10.8	220525Well 4	predator	3	144.026	216.668	72.6412	1	0.00976923	2.11668	0.709648
164	10.8667	220525Well 4	predator	3	144.026	191.187	47.1601	1	0.00976923	1.86775	0.460718
165	10.9333	220525Well 4	predator	3	144.026	220.42	76.3939	1	0.00976923	2.15334	0.746309
166	11	220525Well 4	predator	3	144.026	203.517	59.4906	1	0.00976923	1.9882	0.581177
167	11.0667	220525Well 4	predator	3	144.026	236.446	92.4197	1	0.00976923	2.3099	0.90287
168	11.1333	220525Well 4	predator	3	144.026	246.94	102.913	1	0.00976923	2.41241	1.00539
169	11.2	220525Well 4	predator	4	144.026	186.818	42.7916	1	0.00976923	1.82507	0.418041
170	11.2667	220525Well 4	predator	3	144.026	216.732	72.7059	1	0.00976923	2.11731	0.710281
171	11.3333	220525Well 4	predator	3	144.026	175.602	31.5752	1	0.00976923	1.71549	0.308465
172	11.4	220525Well 4	predator	3	144.026	186.674	42.648	1	0.00976923	1.82367	0.416638
173	11.4667	220525Well 4	predator	3	144.026	195.805	51.779	1	0.00976923	1.91287	0.505841
174	11.5333	220525Well 4	predator	3	144.026	183.614	39.5879	1	0.00976923	1.79377	0.386743
175	11.6	220525Well 4	predator	3	144.026	150.756	6.72969	1	0.00976923	1.47277	0.0657439
176	11.6667	220525Well 4	predator	3	144.026	190.859	46.8324	1	0.00976923	1.86454	0.457516
177	11.7333	220525Well 4	predator	3	144.026	202.283	58.2569	1	0.00976923	1.97615	0.569125
178	11.8	220525Well 4	predator	3	144.026	115.983	-28.0439	0	0.00976923	1.13306	-0.273968
179	11.8667	220525Well 4	predator	3	144.026	123.69	-20.3368	0	0.00976923	1.20835	-0.198675
180	11.9333	220525Well 4	predator	3	144.026	199.302	55.2755	1	0.00976923	1.94703	0.539999
181	12	220525Well 4	predator	3	144.026	190.17	46.1434	1	0.00976923	1.85781	0.450786
182	12.0667	220525Well 4	predator	3	144.026	222.655	78.6284	1	0.00976923	2.17517	0.768139
183	12.1333	220525Well 4	predator	3	144.026	194.441	50.415	1	0.00976923	1.89954	0.492516
184	12.2	220525Well 4	predator	3	144.026	197.594	53.5679	1	0.00976923	1.93034	0.523317
185	12.2667	220525Well 4	predator	3	144.026	129.955	-14.0715	0	0.00976923	1.26956	-0.137468
186	12.3333	220525Well 4	predator	3	144.026	201.418	57.3913	1	0.00976923	1.9677	0.560669
187	12.4	220525Well 4	predator	3	144.026	166.559	22.5325	1	0.00976923	1.62715	0.220125
188	12.4667	220525Well 4	predator	3	144.026	182.425	38.399	1	0.00976923	1.78216	0.375129
189	12.5333	220525Well 4	predator	3	144.026	175.267	31.241	1	0.00976923	1.71223	0.3052
190	12.6	220525Well 4	predator	3	144.026	156.162	12.136	1	0.00976923	1.52559	0.11856
191	12.6667	220525Well 4	predator	3	144.026	159.47	15.4437	1	0.00976923	1.5579	0.150873
192	12.7333	220525Well 4	predator	3	144.026	169.55	25.5233	1	0.00976923	1.65637	0.249343
193	12.8	220525Well 4	predator	3	144.026	182.471	38.4441	1	0.00976923	1.7826	0.375569
194	12.8667	220525Well 4	predator	3	144.026	175.802	31.7752	1	0.00976923	1.71745	0.31042
195	12.9333	220525Well 4	predator	3	144.026	183.796	39.7691	1	0.00976923	1.79554	0.388513
196	13	220525Well 4	predator	3	144.026	172.55	28.524	1	0.00976923	1.68569	0.278658
197	13.0667	220525Well 4	predator	3	144.026	176.32	32.2932	1	0.00976923	1.72251	0.31548
198	13.1333	220525Well 4	predator	4	144.026	181.973	37.9467	1	0.00976923	1.77774	0.37071
199	13.2	220525Well 4	predator	3	144.026	216.434	72.4078	1	0.00976923	2.1144	0.707369
200	13.2667	220525Well 4	predator	3	144.026	212.896	68.8693	1	0.00976923	2.07983	0.6728
201	13.3333	220525Well 4	predator	4	144.026	198.832	54.8054	1	0.00976923	1.94243	0.535406
202	13.4	220525Well 4	predator	3	144.026	218.689	74.6623	1	0.00976923	2.13642	0.729393
203	13.4667	220525Well 4	predator	3	144.026	221.603	77.5767	1	0.00976923	2.16489	0.757865
204	13.5333	220525Well 4	predator	4	144.026	200.967	56.9403	1	0.00976923	1.96329	0.556263
205	13.6	220525Well 4	predator	3	144.026	239.745	95.7184	1	0.00976923	2.34212	0.935095
206	13.6667	220525Well 4	predator	3	144.026	241.57	97.5439	1	0.00976923	2.35996	0.952929
207	13.7333	220525Well 4	predator	3	144.026	221.652	77.6259	1	0.00976923	2.16537	0.758345
208	13.8	220525Well 4	predator	3	144.026	225.432	81.406	1	0.00976923	2.2023	0.795274
209	13.8667	220525Well 4	predator	3	144.026	219.062	75.0355	1	0.00976923	2.14007	0.733039
210	13.9333	220525Well 4	predator	3	144.026	212.858	68.8319	1	0.00976923	2.07946	0.672435
211	14	220525Well 4	predator	3	144.026	205.144	61.1178	1	0.00976923	2.0041	0.597074
212	14.0667	220525Well 4	predator	3	144.026	151.692	7.66597	1	0.00976923	1.48192	0.0748906
213	14.1333	220525Well 4	predator	3	144.026	163.718	19.6912	1	0.00976923	1.5994	0.192368
214	14.2	220525Well 4	predator	3	144.026	141.673	-2.35378	0	0.00976923	1.38403	-0.0229946
215	14.2667	220525Well 4	predator	3	144.026	123.929	-20.097	0	0.00976923	1.21069	-0.196333
216	14.3333	220525Well 4	predator	3	144.026	132.37	-11.656	0	0.00976923	1.29316	-0.11387
217	14.4	220525Well 4	predator	3	144.026	140.232	-3.794	0	0.00976923	1.36996	-0.0370645
218	14.4667	220525Well 4	predator	3	144.026	179.577	35.5506	1	0.00976923	1.75433	0.347302
219	14.5333	220525Well 4	predator	3	144.026	185.759	41.7322	1	0.00976923	1.81472	0.407691
220	14.6	220525Well 4	predator	3	144.026	204.93	60.9036	1	0.00976923	2.00201	0.594981
221	14.6667	220525Well 4	predator	3	144.026	214.92	70.8937	1	0.00976923	2.0996	0.692576
222	14.7333	220525Well 4	predator	3	144.026	209.937	65.9107	1	0.00976923	2.05092	0.643896
223	14.8	220525Well 4	predator	3	144.026	220.45	76.4232	1	0.00976923	2.15362	0.746596
224	14.8667	220525Well 4	predator	4	144.026	168.079	24.0525	1	0.00976923	1.642	0.234975
225	14.9333	220525Well 4	predator	3	144.026	164.067	20.041	1	0.00976923	1.60281	0.195785
226	15	220525Well 4	predator	3	144.026	177.335	33.3089	1	0.00976923	1.73243	0.325402
227	15.0667	220525Well 4	predator	3	144.026	177.217	33.1909	1	0.00976923	1.73128	0.32425
228	15.1333	220525Well 4	predator	3	144.026	169.578	25.5516	1	0.00976923	1.65665	0.249619
229	15.2	220525Well 4	predator	3	144.026	174.128	30.1014	1	0.00976923	1.7011	0.294068
230	15.2667	220525Well 4	predator	3	144.026	164.156	20.1294	1	0.00976923	1.60368	0.196649
231	15.3333	220525Well 4	predator	3	144.026	236.629	92.6029	1	0.00976923	2.31169	0.904659
232	15.4	220525Well 4	predator	3	144.026	159.532	15.5054	1	0.00976923	1.5585	0.151476
233	15.4667	220525Well 4	predator	3	144.026	229.725	85.6983	1	0.00976923	2.24423	0.837207
234	15.5333	220525Well 4	predator	3	144.026	194.601	50.5747	1	0.00976923	1.9011	0.494076
235	15.6	220525Well 4	predator	3	144.026	181.387	37.3609	1	0.00976923	1.77202	0.364988
236	15.6667	220525Well 4	predator	3	144.026	215.627	71.6002	1	0.00976923	2.10651	0.699479
237	15.7333	220525Well 4	predator	3	144.026	155.477	11.4502	1	0.00976923	1.51889	0.11186
238	15.8	220525Well 4	predator	3	144.026	149.329	5.30222	1	0.00976923	1.45883	0.0517986
239	15.8667	220525Well 4	predator	3	144.026	145.244	1.21772	1	0.00976923	1.41892	0.0118962
240	15.9333	220525Well 4	predator	3	144.026	163.851	19.8245	1	0.00976923	1.6007	0.19367
241	16	220525Well 4	predator	3	144.026	205.501	61.4742	1	0.00976923	2.00758	0.600556
242	16.0667	220525Well 4	predator	3	144.026	204.303	60.2767	1	0.00976923	1.99588	0.588857
243	16.1333	220525Well 4	predator	3	144.026	214.508	70.4812	1	0.00976923	2.09558	0.688548
244	16.2	220525Well 4	predator	3	144.026	181.413	37.3867	1	0.00976923	1.77227	0.365239
245	16.2667	220525Well 4	predator	3	144.026	196.24	52.2138	1	0.00976923	1.91712	0.510088
246	16.3333	220525Well 4	predator	3	144.026	163.99	19.964	1	0.00976923	1.60206	0.195033
247	16.4	220525Well 4	predator	3	144.026	143.929	-0.0978267	0	0.00976923	1.40607	-0.000955692
248	16.4667	220525Well 4	predator	3	144.026	212.495	68.4683	1	0.00976923	2.07591	0.668883
249	16.5333	220525Well 4	predator	3	144.026	205.333	61.3064	1	0.00976923	2.00594	0.598916
250	16.6	220525Well 4	predator	3	144.026	184.75	40.7231	1	0.00976923	1.80486	0.397833
251	16.6667	220525Well 4	predator	3	144.026	166.258	22.2319	1	0.00976923	1.62422	0.217188
252	16.7333	220525Well 4	predator	3	144.026	86.0917	-57.9348	0	0.00976923	0.841049	-0.565978
253	16.8	220525Well 4	predator	3	144.026	96.5587	-47.4677	0	0.00976923	0.943304	-0.463723
254	16.8667	220525Well 4	predator	3	144.026	192.287	48.2602	1	0.00976923	1.87849	0.471465
255	16.9333	220525Well 4	predator	3	144.026	143.09	-0.936708	0	0.00976923	1.39788	-0.00915092
256	17	220525Well 4	predator	3	144.026	106.962	-37.0643	0	0.00976923	1.04494	-0.36209
257	17.0667	220525Well 4	predator	3	144.026	191.164	47.1373	1	0.00976923	1.86752	0.460495
258	17.1333	220525Well 4	predator	3	144.026	198.264	54.2374	1	0.00976923	1.93689	0.529858
259	17.2	220525Well 4	predator	3	144.026	155.553	11.5265	1	0.00976923	1.51963	0.112605
260	17.2667	220525Well 4	predator	3	144.026	245.461	101.434	1	0.00976923	2.39796	0.990933
261	17.3333	220525Well 4	predator	3	144.026	230.455	86.4285	1	0.00976923	2.25137	0.84434
262	17.4	220525Well 4	predator	3	144.026	152.889	8.86255	1	0.00976923	1.49361	0.0865803
263	17.4667	220525Well 4	predator	4	144.026	94.9446	-49.0819	0	0.00976923	0.927535	-0.479492
264	17.5333	220525Well 4	predator	3	144.026	85.1311	-58.8954	0	0.00976923	0.831665	-0.575363
265	17.6	220525Well 4	predator	3	144.026	137.583	-6.44344	0	0.00976923	1.34408	-0.0629474
266	17.6667	220525Well 4	predator	3	144.026	170.631	26.6048	1	0.00976923	1.66694	0.259908
267	17.7333	220525Well 4	predator	3	144.026	150.515	6.48873	1	0.00976923	1.47042	0.0633899
268	17.8	220525Well 4	predator	3	144.026	155.832	11.8051	1	0.00976923	1.52235	0.115327
269	17.8667	220525Well 4	predator	3	144.026	204.203	60.1768	1	0.00976923	1.99491	0.587881
270	17.9333	220525Well 4	predator	3	144.026	208.987	64.9605	1	0.00976923	2.04164	0.634614
271	18	220525Well 4	predator	3	144.026	190.391	46.3647	1	0.00976923	1.85998	0.452948
272	18.0667	220525Well 4	predator	3	144.026	241.852	97.8259	1	0.00976923	2.36271	0.955684
273	18.1333	220525Well 4	predator	3	144.026	165.797	21.771	1	0.00976923	1.61971	0.212686
274	18.2	220525Well 4	predator	3	144.026	148.983	4.9566	1	0.00976923	1.45545	0.0484222
275	18.2667	220525Well 4	predator	3	144.026	130.644	-13.3829	0	0.00976923	1.27629	-0.13074
276	18.3333	220525Well 4	predator	3	144.026	144.551	0.524618	1	0.00976923	1.41215	0.00512512
277	18.4	220525Well 4	predator	3	144.026	187.995	43.9687	1	0.00976923	1.83657	0.429541
278	18.4667	220525Well 4	predator	3	144.026	202.71	58.6835	1	0.00976923	1.98032	0.573293
279	18.5333	220525Well 4	predator	3	144.026	211.138	67.1116	1	0.00976923	2.06266	0.655629
280	18.6	220525Well 4	predator	3	144.026	145.069	1.04274	1	0.00976923	1.41721	0.0101868
281	18.6667	220525Well 4	predator	4	144.026	146.762	2.73556	1	0.00976923	1.43375	0.0267243
282	18.7333	220525Well 4	predator	3	144.026	204.762	60.7356	1	0.00976923	2.00037	0.59334
283	18.8	220525Well 4	predator	3	144.026	149.79	5.76337	1	0.00976923	1.46333	0.0563037
284	18.8667	220525Well 4	predator	3	144.026	177.026	33	1	0.00976923	1.72941	0.322385
285	18.9333	220525Well 4	predator	3	144.026	152.229	8.20226	1	0.00976923	1.48716	0.0801298
286	19	220525Well 4	predator	3	144.026	253.926	109.9	1	0.00976923	2.48067	1.07364
287	19.0667	220525Well 4	predator	3	144.026	188.705	44.6785	1	0.00976923	1.8435	0.436475
288	19.1333	220525Well 4	predator	3	144.026	176.616	32.5895	1	0.00976923	1.7254	0.318374
289	19.2	220525Well 4	predator	3	144.026	192.776	48.7498	1	0.00976923	1.88328	0.476249
290	19.2667	220525Well 4	predator	3	144.026	188.213	44.1864	1	0.00976923	1.83869	0.431667
291	19.3333	220525Well 4	predator	3	144.026	196.808	52.7813	1	0.00976923	1.92266	0.515632
292	19.4	220525Well 4	predator	3	144.026	151.287	7.26094	1	0.00976923	1.47796	0.0709338
293	19.4667	220525Well 4	predator	3	144.026	182.652	38.6255	1	0.00976923	1.78437	0.377342
294	19.5333	220525Well 4	predator	4	144.026	165.596	21.5699	1	0.00976923	1.61775	0.210722
295	19.6	220525Well 4	predator	3	144.026	180.138	36.1111	1	0.00976923	1.75981	0.352778
296	19.6667	220525Well 4	predator	3	144.026	180.216	36.1896	1	0.00976923	1.76057	0.353545
297	19.7333	220525Well 4	predator	3	144.026	193.765	49.7389	1	0.00976923	1.89294	0.485911
298	19.8	220525Well 4	predator	3	144.026	191.899	47.8726	1	0.00976923	1.87471	0.467678
299	19.8667	220525Well 4	predator	3	144.026	182.978	38.9518	1	0.00976923	1.78756	0.380529
300	19.9333	220525Well 4	predator	3	144.026	164.414	20.3874	1	0.00976923	1.6062	0.19917
301	20	220525Well 4	predator	3	144.026	174.282	30.2553	1	0.00976923	1.7026	0.295571
1	0	220525Well 5	predator	3	122.983	111.473	-11.51	0	0.00976923	1.08901	-0.112444
2	0.0666667	220525Well 5	predator	3	122.983	106.831	-16.152	0	0.00976923	1.04366	-0.157792
3	0.133333	220525Well 5	predator	3	122.983	103.066	-19.9166	0	0.00976923	1.00688	-0.19457
4	0.2	220525Well 5	predator	3	122.983	107.2	-15.7829	0	0.00976923	1.04726	-0.154187
5	0.266667	220525Well 5	predator	3	122.983	111.185	-11.7983	0	0.00976923	1.08619	-0.11526
6	0.333333	220525Well 5	predator	3	122.983	106.04	-16.9432	0	0.00976923	1.03593	-0.165522
7	0.4	220525Well 5	predator	2	122.983	111.252	-11.7311	0	0.00976923	1.08685	-0.114604
8	0.466667	220525Well 5	predator	2	122.983	118.442	-4.54069	0	0.00976923	1.15709	-0.044359
9	0.533333	220525Well 5	predator	2	122.983	120.516	-2.46709	0	0.00976923	1.17735	-0.0241016
10	0.6	220525Well 5	predator	3	122.983	107.708	-15.2751	0	0.00976923	1.05222	-0.149226
11	0.666667	220525Well 5	predator	3	122.983	100.947	-22.0361	0	0.00976923	0.986173	-0.215276
12	0.733333	220525Well 5	predator	3	122.983	96.7032	-26.2798	0	0.00976923	0.944715	-0.256734
13	0.8	220525Well 5	predator	2	122.983	91.4686	-31.5144	0	0.00976923	0.893578	-0.307871
14	0.866667	220525Well 5	predator	3	122.983	116.436	-6.54704	0	0.00976923	1.13749	-0.0639596
15	0.933333	220525Well 5	predator	2	122.983	110.765	-12.2182	0	0.00976923	1.08209	-0.119362
16	1	220525Well 5	predator	3	122.983	117.622	-5.36121	0	0.00976923	1.14907	-0.0523749
17	1.06667	220525Well 5	predator	3	122.983	116.632	-6.3505	0	0.00976923	1.13941	-0.0620395
18	1.13333	220525Well 5	predator	4	122.983	115.422	-7.56053	0	0.00976923	1.12759	-0.0738606
19	1.2	220525Well 5	predator	3	122.983	100.1	-22.8832	0	0.00976923	0.977897	-0.223552
20	1.26667	220525Well 5	predator	3	122.983	107.305	-15.6778	0	0.00976923	1.04829	-0.15316
21	1.33333	220525Well 5	predator	3	122.983	105.335	-17.6482	0	0.00976923	1.02904	-0.172409
22	1.4	220525Well 5	predator	3	122.983	107.724	-15.2585	0	0.00976923	1.05238	-0.149064
23	1.46667	220525Well 5	predator	3	122.983	91.2531	-31.7298	0	0.00976923	0.891473	-0.309976
24	1.53333	220525Well 5	predator	3	122.983	94.1075	-28.8755	0	0.00976923	0.919357	-0.282092
25	1.6	220525Well 5	predator	3	122.983	89.5175	-33.4655	0	0.00976923	0.874517	-0.326932
26	1.66667	220525Well 5	predator	3	122.983	96.0518	-26.9312	0	0.00976923	0.938352	-0.263097
27	1.73333	220525Well 5	predator	3	122.983	96.9965	-25.9865	0	0.00976923	0.947581	-0.253868
28	1.8	220525Well 5	predator	2	122.983	108.764	-14.2192	0	0.00976923	1.06254	-0.138911
29	1.86667	220525Well 5	predator	4	122.983	106.224	-16.7585	0	0.00976923	1.03773	-0.163717
30	1.93333	220525Well 5	predator	3	122.983	101.738	-21.2453	0	0.00976923	0.993899	-0.20755
31	2	220525Well 5	predator	3	122.983	108.255	-14.7283	0	0.00976923	1.05756	-0.143885
32	2.06667	220525Well 5	predator	3	122.983	116.407	-6.57637	0	0.00976923	1.1372	-0.0642461
33	2.13333	220525Well 5	predator	2	122.983	117.46	-5.52323	0	0.00976923	1.14749	-0.0539577
34	2.2	220525Well 5	predator	3	122.983	113.339	-9.64352	0	0.00976923	1.10724	-0.0942097
35	2.26667	220525Well 5	predator	4	122.983	110.916	-12.0671	0	0.00976923	1.08356	-0.117886
36	2.33333	220525Well 5	predator	4	122.983	97.2122	-25.7708	0	0.00976923	0.949688	-0.251761
37	2.4	220525Well 5	predator	3	122.983	110.969	-12.0138	0	0.00976923	1.08408	-0.117366
38	2.46667	220525Well 5	predator	3	122.983	107.962	-15.0211	0	0.00976923	1.0547	-0.146745
39	2.53333	220525Well 5	predator	3	122.983	115.888	-7.09456	0	0.00976923	1.13214	-0.0693084
40	2.6	220525Well 5	predator	4	122.983	108.613	-14.37	0	0.00976923	1.06107	-0.140384
41	2.66667	220525Well 5	predator	3	122.983	105.28	-17.7028	0	0.00976923	1.02851	-0.172943
42	2.73333	220525Well 5	predator	2	122.983	105.472	-17.5105	0	0.00976923	1.03038	-0.171064
43	2.8	220525Well 5	predator	3	122.983	114.981	-8.00212	0	0.00976923	1.12327	-0.0781746
44	2.86667	220525Well 5	predator	3	122.983	108.197	-14.7855	0	0.00976923	1.05701	-0.144443
45	2.93333	220525Well 5	predator	3	122.983	101.12	-21.8632	0	0.00976923	0.987862	-0.213587
46	3	220525Well 5	predator	4	122.983	99.2845	-23.6984	0	0.00976923	0.969934	-0.231516
47	3.06667	220525Well 5	predator	3	122.983	87.6179	-35.3651	0	0.00976923	0.85596	-0.34549
48	3.13333	220525Well 5	predator	2	122.983	103.544	-19.4386	0	0.00976923	1.01155	-0.189901
49	3.2	220525Well 5	predator	6	122.983	95.0634	-27.9196	0	0.00976923	0.928696	-0.272753
50	3.26667	220525Well 5	predator	3	122.983	83.4263	-39.5567	0	0.00976923	0.81501	-0.386439
51	3.33333	220525Well 5	predator	2	122.983	81.8893	-41.0937	0	0.00976923	0.799996	-0.401453
52	3.4	220525Well 5	predator	3	122.983	79.3727	-43.6102	0	0.00976923	0.775411	-0.426038
53	3.46667	220525Well 5	predator	4	122.983	83.0677	-39.9153	0	0.00976923	0.811508	-0.389941
54	3.53333	220525Well 5	predator	3	122.983	77.3718	-45.6112	0	0.00976923	0.755863	-0.445586
55	3.6	220525Well 5	predator	3	122.983	87.1729	-35.8101	0	0.00976923	0.851612	-0.349837
56	3.66667	220525Well 5	predator	3	122.983	89.2265	-33.7565	0	0.00976923	0.871674	-0.329775
57	3.73333	220525Well 5	predator	5	122.983	81.7713	-41.2117	0	0.00976923	0.798842	-0.402607
58	3.8	220525Well 5	predator	3	122.983	77.4489	-45.5341	0	0.00976923	0.756616	-0.444833
59	3.86667	220525Well 5	predator	3	122.983	79.6051	-43.3779	0	0.00976923	0.777681	-0.423768
60	3.93333	220525Well 5	predator	3	122.983	75.5512	-47.4318	0	0.00976923	0.738077	-0.463372
61	4	220525Well 5	predator	3	122.983	75.3157	-47.6673	0	0.00976923	0.735776	-0.465673
62	4.06667	220525Well 5	predator	3	122.983	87.2065	-35.7765	0	0.00976923	0.85194	-0.349509
63	4.13333	220525Well 5	predator	3	122.983	96.8594	-26.1235	0	0.00976923	0.946242	-0.255207
64	4.2	220525Well 5	predator	3	122.983	97.0693	-25.9136	0	0.00976923	0.948293	-0.253156
65	4.26667	220525Well 5	predator	3	122.983	89.3929	-33.59	0	0.00976923	0.8733	-0.328149
66	4.33333	220525Well 5	predator	2	122.983	79.2329	-43.7501	0	0.00976923	0.774044	-0.427405
67	4.4	220525Well 5	predator	2	122.983	76.1647	-46.8183	0	0.00976923	0.74407	-0.457379
68	4.46667	220525Well 5	predator	4	122.983	67.9609	-55.0221	0	0.00976923	0.663926	-0.537523
69	4.53333	220525Well 5	predator	4	122.983	70.2129	-52.77	0	0.00976923	0.685926	-0.515523
70	4.6	220525Well 5	predator	3	122.983	55.7152	-67.2678	0	0.00976923	0.544294	-0.657155
71	4.66667	220525Well 5	predator	3	122.983	98.1953	-24.7877	0	0.00976923	0.959293	-0.242157
72	4.73333	220525Well 5	predator	3	122.983	103.627	-19.3565	0	0.00976923	1.01235	-0.189098
73	4.8	220525Well 5	predator	3	122.983	104.225	-18.7577	0	0.00976923	1.0182	-0.183248
74	4.86667	220525Well 5	predator	3	122.983	101.88	-21.1033	0	0.00976923	0.995286	-0.206163
75	4.93333	220525Well 5	predator	3	122.983	120.333	-2.64976	0	0.00976923	1.17556	-0.0258861
76	5	220525Well 5	predator	3	122.983	108.248	-14.7354	0	0.00976923	1.0575	-0.143954
77	5.06667	220525Well 5	predator	3	122.983	98.3849	-24.5981	0	0.00976923	0.961145	-0.240304
78	5.13333	220525Well 5	predator	3	122.983	94.8318	-28.1512	0	0.00976923	0.926434	-0.275015
79	5.2	220525Well 5	predator	3	122.983	87.3203	-35.6627	0	0.00976923	0.853052	-0.348397
80	5.26667	220525Well 5	predator	3	122.983	96.2578	-26.7252	0	0.00976923	0.940365	-0.261085
81	5.33333	220525Well 5	predator	3	122.983	82.9358	-40.0472	0	0.00976923	0.810219	-0.39123
82	5.4	220525Well 5	predator	3	122.983	96.007	-26.976	0	0.00976923	0.937914	-0.263535
83	5.46667	220525Well 5	predator	2	122.983	113.613	-9.3696	0	0.00976923	1.10992	-0.0915338
84	5.53333	220525Well 5	predator	3	122.983	113.922	-9.06111	0	0.00976923	1.11293	-0.0885201
85	5.6	220525Well 5	predator	3	122.983	103.736	-19.2466	0	0.00976923	1.01342	-0.188024
86	5.66667	220525Well 5	predator	3	122.983	116.619	-6.36428	0	0.00976923	1.13927	-0.0621742
87	5.73333	220525Well 5	predator	3	122.983	117.228	-5.75455	0	0.00976923	1.14523	-0.0562175
88	5.8	220525Well 5	predator	3	122.983	126.41	3.42678	1	0.00976923	1.23493	0.033477
89	5.86667	220525Well 5	predator	3	122.983	96.7151	-26.2679	0	0.00976923	0.944832	-0.256617
90	5.93333	220525Well 5	predator	3	122.983	90.0043	-32.9787	0	0.00976923	0.879273	-0.322176
91	6	220525Well 5	predator	3	122.983	95.1246	-27.8584	0	0.00976923	0.929294	-0.272155
92	6.06667	220525Well 5	predator	4	122.983	94.5132	-28.4698	0	0.00976923	0.923321	-0.278128
93	6.13333	220525Well 5	predator	3	122.983	102.404	-20.5785	0	0.00976923	1.00041	-0.201036
94	6.2	220525Well 5	predator	3	122.983	124.098	1.11513	1	0.00976923	1.21234	0.0108939
95	6.26667	220525Well 5	predator	3	122.983	120.488	-2.4948	0	0.00976923	1.17708	-0.0243723
96	6.33333	220525Well 5	predator	3	122.983	119.235	-3.74793	0	0.00976923	1.16483	-0.0366144
97	6.4	220525Well 5	predator	3	122.983	120.742	-2.24138	0	0.00976923	1.17955	-0.0218965
98	6.46667	220525Well 5	predator	2	122.983	139.019	16.0363	1	0.00976923	1.35811	0.156662
99	6.53333	220525Well 5	predator	3	122.983	183.588	60.6049	1	0.00976923	1.79351	0.592064
100	6.6	220525Well 5	predator	3	122.983	122.677	-0.306314	0	0.00976923	1.19846	-0.00299245
101	6.66667	220525Well 5	predator	3	122.983	121.216	-1.76661	0	0.00976923	1.18419	-0.0172584
102	6.73333	220525Well 5	predator	3	122.983	134.328	11.3448	1	0.00976923	1.31228	0.11083
103	6.8	220525Well 5	predator	3	122.983	178.795	55.8118	1	0.00976923	1.74669	0.545238
104	6.86667	220525Well 5	predator	3	122.983	179.562	56.5787	1	0.00976923	1.75418	0.55273
105	6.93333	220525Well 5	predator	3	122.983	152.014	29.0309	1	0.00976923	1.48506	0.283609
106	7	220525Well 5	predator	3	122.983	152.579	29.5965	1	0.00976923	1.49058	0.289135
107	7.06667	220525Well 5	predator	3	122.983	128.385	5.40203	1	0.00976923	1.25422	0.0527737
108	7.13333	220525Well 5	predator	3	122.983	118.026	-4.95661	0	0.00976923	1.15303	-0.0484223
109	7.2	220525Well 5	predator	3	122.983	190.018	67.0355	1	0.00976923	1.85633	0.654885
110	7.26667	220525Well 5	predator	3	122.983	151.372	28.3894	1	0.00976923	1.47879	0.277343
111	7.33333	220525Well 5	predator	3	122.983	119.024	-3.95862	0	0.00976923	1.16278	-0.0386727
112	7.4	220525Well 5	predator	4	122.983	85.2333	-37.7496	0	0.00976923	0.832664	-0.368785
113	7.46667	220525Well 5	predator	3	122.983	165.763	42.7805	1	0.00976923	1.61938	0.417932
114	7.53333	220525Well 5	predator	3	122.983	156.804	33.8215	1	0.00976923	1.53186	0.33041
115	7.6	220525Well 5	predator	3	122.983	83.5442	-39.4388	0	0.00976923	0.816163	-0.385287
116	7.66667	220525Well 5	predator	3	122.983	124.822	1.83946	1	0.00976923	1.21942	0.0179701
117	7.73333	220525Well 5	predator	3	122.983	111.806	-11.1766	0	0.00976923	1.09226	-0.109187
118	7.8	220525Well 5	predator	3	122.983	99.9132	-23.0698	0	0.00976923	0.976075	-0.225374
119	7.86667	220525Well 5	predator	3	122.983	106.514	-16.4692	0	0.00976923	1.04056	-0.160892
120	7.93333	220525Well 5	predator	3	122.983	94.3913	-28.5917	0	0.00976923	0.922131	-0.279318
121	8	220525Well 5	predator	3	122.983	79.6344	-43.3486	0	0.00976923	0.777967	-0.423482
122	8.06667	220525Well 5	predator	3	122.983	151.438	28.4553	1	0.00976923	1.47944	0.277986
123	8.13333	220525Well 5	predator	3	122.983	127.121	4.1377	1	0.00976923	1.24187	0.0404222
124	8.2	220525Well 5	predator	3	122.983	120.097	-2.88569	0	0.00976923	1.17326	-0.028191
125	8.26667	220525Well 5	predator	3	122.983	102.199	-20.7836	0	0.00976923	0.998409	-0.20304
126	8.33333	220525Well 5	predator	3	122.983	120.157	-2.82623	0	0.00976923	1.17384	-0.0276101
127	8.4	220525Well 5	predator	3	122.983	129.393	6.4097	1	0.00976923	1.26407	0.0626178
128	8.46667	220525Well 5	predator	3	122.983	170.369	47.3857	1	0.00976923	1.66437	0.462922
129	8.53333	220525Well 5	predator	3	122.983	123.678	0.695167	1	0.00976923	1.20824	0.00679125
130	8.6	220525Well 5	predator	3	122.983	166.514	43.5306	1	0.00976923	1.62671	0.425261
131	8.66667	220525Well 5	predator	3	122.983	166.279	43.2957	1	0.00976923	1.62441	0.422966
132	8.73333	220525Well 5	predator	3	122.983	115.827	-7.15588	0	0.00976923	1.13154	-0.0699075
133	8.8	220525Well 5	predator	3	122.983	104.663	-18.3201	0	0.00976923	1.02248	-0.178973
134	8.86667	220525Well 5	predator	3	122.983	108.805	-14.1781	0	0.00976923	1.06294	-0.138509
135	8.93333	220525Well 5	predator	3	122.983	120.484	-2.4992	0	0.00976923	1.17703	-0.0244152
136	9	220525Well 5	predator	3	122.983	113.03	-9.95315	0	0.00976923	1.10421	-0.0972346
137	9.06667	220525Well 5	predator	3	122.983	154.121	31.1382	1	0.00976923	1.50565	0.304196
138	9.13333	220525Well 5	predator	3	122.983	134.521	11.5385	1	0.00976923	1.31417	0.112722
139	9.2	220525Well 5	predator	3	122.983	139.71	16.7274	1	0.00976923	1.36486	0.163414
140	9.26667	220525Well 5	predator	3	122.983	152.943	29.9595	1	0.00976923	1.49413	0.292682
141	9.33333	220525Well 5	predator	3	122.983	148.282	25.2986	1	0.00976923	1.4486	0.247148
142	9.4	220525Well 5	predator	3	122.983	150.008	27.0251	1	0.00976923	1.46546	0.264014
143	9.46667	220525Well 5	predator	3	122.983	163.875	40.8922	1	0.00976923	1.60093	0.399486
144	9.53333	220525Well 5	predator	3	122.983	181.943	58.9596	1	0.00976923	1.77744	0.57599
145	9.6	220525Well 5	predator	3	122.983	193.421	70.4378	1	0.00976923	1.88957	0.688123
146	9.66667	220525Well 5	predator	3	122.983	208.069	85.0862	1	0.00976923	2.03268	0.831227
147	9.73333	220525Well 5	predator	3	122.983	190.791	67.8081	1	0.00976923	1.86388	0.662433
148	9.8	220525Well 5	predator	3	122.983	163.549	40.566	1	0.00976923	1.59775	0.396298
149	9.86667	220525Well 5	predator	3	122.983	132.289	9.30576	1	0.00976923	1.29236	0.0909101
150	9.93333	220525Well 5	predator	3	122.983	136.389	13.4056	1	0.00976923	1.33241	0.130963
151	10	220525Well 5	predator	3	122.983	126.108	3.12463	1	0.00976923	1.23197	0.0305252
152	10.0667	220525Well 5	predator	3	122.983	118.978	-4.00467	0	0.00976923	1.16233	-0.0391226
153	10.1333	220525Well 5	predator	3	122.983	157.452	34.4694	1	0.00976923	1.53819	0.336739
154	10.2	220525Well 5	predator	3	122.983	140.939	17.9565	1	0.00976923	1.37687	0.175421
155	10.2667	220525Well 5	predator	3	122.983	144.713	21.7301	1	0.00976923	1.41374	0.212287
156	10.3333	220525Well 5	predator	3	122.983	139.369	16.3862	1	0.00976923	1.36153	0.160081
157	10.4	220525Well 5	predator	3	122.983	148.591	25.6079	1	0.00976923	1.45162	0.25017
158	10.4667	220525Well 5	predator	4	122.983	181.286	58.3031	1	0.00976923	1.77103	0.569576
159	10.5333	220525Well 5	predator	3	122.983	195.296	72.313	1	0.00976923	1.90789	0.706442
160	10.6	220525Well 5	predator	3	122.983	173.935	50.9518	1	0.00976923	1.69921	0.49776
161	10.6667	220525Well 5	predator	3	122.983	170.45	47.4671	1	0.00976923	1.66517	0.463717
162	10.7333	220525Well 5	predator	3	122.983	137.636	14.6532	1	0.00976923	1.3446	0.14315
163	10.8	220525Well 5	predator	3	122.983	142.517	19.5337	1	0.00976923	1.39228	0.19083
164	10.8667	220525Well 5	predator	3	122.983	141.186	18.2034	1	0.00976923	1.37928	0.177834
165	10.9333	220525Well 5	predator	3	122.983	145.734	22.7514	1	0.00976923	1.42371	0.222263
166	11	220525Well 5	predator	3	122.983	133.824	10.8409	1	0.00976923	1.30736	0.105907
167	11.0667	220525Well 5	predator	3	122.983	127.597	4.61382	1	0.00976923	1.24652	0.0450735
168	11.1333	220525Well 5	predator	3	122.983	157.03	34.0472	1	0.00976923	1.53406	0.332615
169	11.2	220525Well 5	predator	3	122.983	147.348	24.3652	1	0.00976923	1.43948	0.238029
170	11.2667	220525Well 5	predator	3	122.983	130.04	7.05697	1	0.00976923	1.27039	0.0689412
171	11.3333	220525Well 5	predator	3	122.983	146.775	23.7919	1	0.00976923	1.43388	0.232428
172	11.4	220525Well 5	predator	3	122.983	124.095	1.11167	1	0.00976923	1.21231	0.0108602
173	11.4667	220525Well 5	predator	3	122.983	140.428	17.4454	1	0.00976923	1.37188	0.170428
174	11.5333	220525Well 5	predator	3	122.983	140.418	17.4351	1	0.00976923	1.37178	0.170327
175	11.6	220525Well 5	predator	3	122.983	134.656	11.6732	1	0.00976923	1.31549	0.114038
176	11.6667	220525Well 5	predator	3	122.983	172.536	49.5534	1	0.00976923	1.68555	0.484099
177	11.7333	220525Well 5	predator	3	122.983	192.687	69.704	1	0.00976923	1.8824	0.680955
178	11.8	220525Well 5	predator	3	122.983	154.583	31.6	1	0.00976923	1.51016	0.308708
179	11.8667	220525Well 5	predator	3	122.983	142.226	19.2428	1	0.00976923	1.38944	0.187987
180	11.9333	220525Well 5	predator	3	122.983	144.5	21.5169	1	0.00976923	1.41165	0.210203
181	12	220525Well 5	predator	3	122.983	142.626	19.6435	1	0.00976923	1.39335	0.191901
182	12.0667	220525Well 5	predator	3	122.983	164.852	41.8693	1	0.00976923	1.61048	0.409031
183	12.1333	220525Well 5	predator	3	122.983	147.118	24.1354	1	0.00976923	1.43723	0.235785
184	12.2	220525Well 5	predator	3	122.983	127.738	4.75466	1	0.00976923	1.2479	0.0464493
185	12.2667	220525Well 5	predator	3	122.983	143.68	20.6974	1	0.00976923	1.40365	0.202198
186	12.3333	220525Well 5	predator	3	122.983	137.644	14.6609	1	0.00976923	1.34467	0.143225
187	12.4	220525Well 5	predator	3	122.983	150.384	27.4012	1	0.00976923	1.46914	0.267689
188	12.4667	220525Well 5	predator	3	122.983	190.545	67.5617	1	0.00976923	1.86147	0.660026
189	12.5333	220525Well 5	predator	3	122.983	155.237	32.2539	1	0.00976923	1.51655	0.315096
190	12.6	220525Well 5	predator	3	122.983	123.238	0.255402	1	0.00976923	1.20394	0.00249508
191	12.6667	220525Well 5	predator	3	122.983	122.739	-0.243994	0	0.00976923	1.19907	-0.00238364
192	12.7333	220525Well 5	predator	3	122.983	154.129	31.1459	1	0.00976923	1.50572	0.304271
193	12.8	220525Well 5	predator	3	122.983	203.559	80.576	1	0.00976923	1.98861	0.787165
194	12.8667	220525Well 5	predator	3	122.983	198.835	75.8518	1	0.00976923	1.94246	0.741014
195	12.9333	220525Well 5	predator	3	122.983	235.897	112.914	1	0.00976923	2.30453	1.10308
196	13	220525Well 5	predator	3	122.983	201.799	78.8162	1	0.00976923	1.97142	0.769973
197	13.0667	220525Well 5	predator	3	122.983	175.691	52.7085	1	0.00976923	1.71637	0.514921
198	13.1333	220525Well 5	predator	3	122.983	166.902	43.9192	1	0.00976923	1.63051	0.429057
199	13.2	220525Well 5	predator	3	122.983	168.003	45.0196	1	0.00976923	1.64126	0.439807
200	13.2667	220525Well 5	predator	3	122.983	173.189	50.2065	1	0.00976923	1.69193	0.490479
201	13.3333	220525Well 5	predator	3	122.983	128.189	5.20594	1	0.00976923	1.25231	0.050858
202	13.4	220525Well 5	predator	3	122.983	124.194	1.21079	1	0.00976923	1.21328	0.0118284
203	13.4667	220525Well 5	predator	3	122.983	100.55	-22.4335	0	0.00976923	0.982291	-0.219158
204	13.5333	220525Well 5	predator	3	122.983	84.9331	-38.0498	0	0.00976923	0.829732	-0.371718
205	13.6	220525Well 5	predator	3	122.983	143.674	20.6908	1	0.00976923	1.40358	0.202133
206	13.6667	220525Well 5	predator	3	122.983	165.612	42.6295	1	0.00976923	1.61791	0.416458
207	13.7333	220525Well 5	predator	3	122.983	160.815	37.8316	1	0.00976923	1.57103	0.369585
208	13.8	220525Well 5	predator	3	122.983	150.834	27.8511	1	0.00976923	1.47353	0.272084
209	13.8667	220525Well 5	predator	3	122.983	160.516	37.533	1	0.00976923	1.56812	0.366669
210	13.9333	220525Well 5	predator	3	122.983	148.865	25.8816	1	0.00976923	1.45429	0.252843
211	14	220525Well 5	predator	3	122.983	232.588	109.605	1	0.00976923	2.27221	1.07076
212	14.0667	220525Well 5	predator	3	122.983	228.317	105.334	1	0.00976923	2.23048	1.02903
213	14.1333	220525Well 5	predator	3	122.983	218.45	95.4674	1	0.00976923	2.13409	0.932643
214	14.2	220525Well 5	predator	3	122.983	198.007	75.0244	1	0.00976923	1.93438	0.732931
215	14.2667	220525Well 5	predator	3	122.983	210.829	87.8456	1	0.00976923	2.05963	0.858184
216	14.3333	220525Well 5	predator	3	122.983	214.363	91.3802	1	0.00976923	2.09416	0.892714
217	14.4	220525Well 5	predator	3	122.983	205.621	82.6376	1	0.00976923	2.00876	0.807306
218	14.4667	220525Well 5	predator	3	122.983	208.485	85.502	1	0.00976923	2.03674	0.835288
219	14.5333	220525Well 5	predator	3	122.983	207.453	84.47	1	0.00976923	2.02666	0.825207
220	14.6	220525Well 5	predator	3	122.983	208.752	85.7687	1	0.00976923	2.03934	0.837894
221	14.6667	220525Well 5	predator	3	122.983	211.714	88.7306	1	0.00976923	2.06828	0.86683
222	14.7333	220525Well 5	predator	3	122.983	224.877	101.894	1	0.00976923	2.19688	0.995429
223	14.8	220525Well 5	predator	3	122.983	222.882	99.8988	1	0.00976923	2.17738	0.975934
224	14.8667	220525Well 5	predator	3	122.983	218.856	95.8734	1	0.00976923	2.13806	0.936609
225	14.9333	220525Well 5	predator	3	122.983	215.303	92.3201	1	0.00976923	2.10335	0.901896
226	15	220525Well 5	predator	3	122.983	212.868	89.8854	1	0.00976923	2.07956	0.878111
227	15.0667	220525Well 5	predator	3	122.983	246.317	123.334	1	0.00976923	2.40632	1.20488
228	15.1333	220525Well 5	predator	3	122.983	243.399	120.416	1	0.00976923	2.37782	1.17637
229	15.2	220525Well 5	predator	3	122.983	239.112	116.129	1	0.00976923	2.33594	1.13449
230	15.2667	220525Well 5	predator	3	122.983	260.219	137.236	1	0.00976923	2.54214	1.34069
231	15.3333	220525Well 5	predator	3	122.983	253.652	130.669	1	0.00976923	2.47799	1.27654
232	15.4	220525Well 5	predator	3	122.983	188.834	65.8513	1	0.00976923	1.84477	0.643316
233	15.4667	220525Well 5	predator	3	122.983	258.383	135.4	1	0.00976923	2.5242	1.32275
234	15.5333	220525Well 5	predator	3	122.983	252.454	129.471	1	0.00976923	2.46628	1.26484
235	15.6	220525Well 5	predator	3	122.983	262.33	139.348	1	0.00976923	2.56277	1.36132
236	15.6667	220525Well 5	predator	3	122.983	216.258	93.2746	1	0.00976923	2.11267	0.911221
237	15.7333	220525Well 5	predator	3	122.983	205.996	83.0132	1	0.00976923	2.01242	0.810976
238	15.8	220525Well 5	predator	3	122.983	188.942	65.9591	1	0.00976923	1.84582	0.64437
239	15.8667	220525Well 5	predator	3	122.983	194.799	71.8159	1	0.00976923	1.90304	0.701586
240	15.9333	220525Well 5	predator	3	122.983	214.118	91.1349	1	0.00976923	2.09177	0.890318
241	16	220525Well 5	predator	3	122.983	228.998	106.015	1	0.00976923	2.23714	1.03569
242	16.0667	220525Well 5	predator	3	122.983	246.762	123.779	1	0.00976923	2.41067	1.20922
243	16.1333	220525Well 5	predator	3	122.983	256.227	133.244	1	0.00976923	2.50314	1.30169
244	16.2	220525Well 5	predator	3	122.983	190.006	67.0235	1	0.00976923	1.85622	0.654768
245	16.2667	220525Well 5	predator	3	122.983	246.201	123.218	1	0.00976923	2.40519	1.20374
246	16.3333	220525Well 5	predator	3	122.983	167.764	44.7815	1	0.00976923	1.63893	0.437481
247	16.4	220525Well 5	predator	3	122.983	196.705	73.7222	1	0.00976923	1.92166	0.720209
248	16.4667	220525Well 5	predator	3	122.983	202.485	79.5021	1	0.00976923	1.97812	0.776675
249	16.5333	220525Well 5	predator	3	122.983	198.325	75.3418	1	0.00976923	1.93748	0.736031
250	16.6	220525Well 5	predator	3	122.983	191.962	68.9795	1	0.00976923	1.87533	0.673876
251	16.6667	220525Well 5	predator	3	122.983	216.906	93.9229	1	0.00976923	2.119	0.917554
252	16.7333	220525Well 5	predator	3	122.983	182.307	59.3239	1	0.00976923	1.781	0.579548
253	16.8	220525Well 5	predator	3	122.983	202.194	79.2109	1	0.00976923	1.97528	0.77383
254	16.8667	220525Well 5	predator	3	122.983	179.426	56.4428	1	0.00976923	1.75285	0.551403
255	16.9333	220525Well 5	predator	3	122.983	210.446	87.4634	1	0.00976923	2.0559	0.85445
256	17	220525Well 5	predator	3	122.983	191.408	68.4247	1	0.00976923	1.86991	0.668457
257	17.0667	220525Well 5	predator	3	122.983	189.445	66.4623	1	0.00976923	1.85073	0.649285
258	17.1333	220525Well 5	predator	3	122.983	183.643	60.6598	1	0.00976923	1.79405	0.5926
259	17.2	220525Well 5	predator	3	122.983	171.959	48.9762	1	0.00976923	1.67991	0.47846
260	17.2667	220525Well 5	predator	3	122.983	176.859	53.8759	1	0.00976923	1.72778	0.526326
261	17.3333	220525Well 5	predator	3	122.983	209.635	86.6523	1	0.00976923	2.04798	0.846526
262	17.4	220525Well 5	predator	3	122.983	218.331	95.3481	1	0.00976923	2.13293	0.931478
263	17.4667	220525Well 5	predator	3	122.983	166.326	43.343	1	0.00976923	1.62488	0.423428
264	17.5333	220525Well 5	predator	3	122.983	97.5313	-25.4517	0	0.00976923	0.952805	-0.248644
265	17.6	220525Well 5	predator	3	122.983	140.558	17.5749	1	0.00976923	1.37314	0.171693
266	17.6667	220525Well 5	predator	3	122.983	134.107	11.124	1	0.00976923	1.31012	0.108672
267	17.7333	220525Well 5	predator	3	122.983	161.536	38.5529	1	0.00976923	1.57808	0.376633
268	17.8	220525Well 5	predator	3	122.983	273.715	150.732	1	0.00976923	2.67399	1.47254
269	17.8667	220525Well 5	predator	3	122.983	201.719	78.7361	1	0.00976923	1.97064	0.769191
270	17.9333	220525Well 5	predator	3	122.983	206.458	83.4751	1	0.00976923	2.01694	0.815487
271	18	220525Well 5	predator	3	122.983	216.153	93.1696	1	0.00976923	2.11164	0.910195
272	18.0667	220525Well 5	predator	3	122.983	202.512	79.5288	1	0.00976923	1.97838	0.776935
273	18.1333	220525Well 5	predator	3	122.983	217.297	94.3136	1	0.00976923	2.12282	0.921372
274	18.2	220525Well 5	predator	3	122.983	183.759	60.7761	1	0.00976923	1.79519	0.593736
275	18.2667	220525Well 5	predator	3	122.983	135.826	12.8433	1	0.00976923	1.32692	0.125469
276	18.3333	220525Well 5	predator	3	122.983	176.689	53.7062	1	0.00976923	1.72612	0.524669
277	18.4	220525Well 5	predator	3	122.983	172.908	49.9253	1	0.00976923	1.68918	0.487731
278	18.4667	220525Well 5	predator	3	122.983	225.869	102.886	1	0.00976923	2.20656	1.00511
279	18.5333	220525Well 5	predator	3	122.983	217.759	94.7756	1	0.00976923	2.12733	0.925885
280	18.6	220525Well 5	predator	3	122.983	201.637	78.654	1	0.00976923	1.96984	0.76839
281	18.6667	220525Well 5	predator	3	122.983	213.991	91.0078	1	0.00976923	2.09053	0.889077
282	18.7333	220525Well 5	predator	3	122.983	212.168	89.1855	1	0.00976923	2.07272	0.871274
283	18.8	220525Well 5	predator	3	122.983	234.242	111.259	1	0.00976923	2.28836	1.08691
284	18.8667	220525Well 5	predator	3	122.983	247.228	124.245	1	0.00976923	2.41523	1.21378
285	18.9333	220525Well 5	predator	3	122.983	261.368	138.385	1	0.00976923	2.55336	1.35191
286	19	220525Well 5	predator	3	122.983	251.27	128.287	1	0.00976923	2.45471	1.25326
287	19.0667	220525Well 5	predator	3	122.983	244.465	121.482	1	0.00976923	2.38823	1.18678
288	19.1333	220525Well 5	predator	3	122.983	227.487	104.504	1	0.00976923	2.22237	1.02092
289	19.2	220525Well 5	predator	3	122.983	160.866	37.8827	1	0.00976923	1.57153	0.370085
290	19.2667	220525Well 5	predator	3	122.983	140.406	17.4233	1	0.00976923	1.37166	0.170213
291	19.3333	220525Well 5	predator	3	122.983	227.27	104.287	1	0.00976923	2.22025	1.0188
292	19.4	220525Well 5	predator	3	122.983	219.298	96.3154	1	0.00976923	2.14238	0.940927
293	19.4667	220525Well 5	predator	3	122.983	198.162	75.179	1	0.00976923	1.93589	0.734441
294	19.5333	220525Well 5	predator	3	122.983	193.004	70.0207	1	0.00976923	1.8855	0.684048
295	19.6	220525Well 5	predator	3	122.983	180.252	57.2691	1	0.00976923	1.76092	0.559475
296	19.6667	220525Well 5	predator	3	122.983	180.602	57.6193	1	0.00976923	1.76435	0.562896
297	19.7333	220525Well 5	predator	3	122.983	194.289	71.3057	1	0.00976923	1.89805	0.696602
298	19.8	220525Well 5	predator	3	122.983	184.297	61.3145	1	0.00976923	1.80044	0.598996
299	19.8667	220525Well 5	predator	3	122.983	258.078	135.095	1	0.00976923	2.52123	1.31978
300	19.9333	220525Well 5	predator	3	122.983	175.885	52.9023	1	0.00976923	1.71826	0.516815
301	20	220525Well 5	predator	3	122.983	193.379	70.3961	1	0.00976923	1.88916	0.687716
1	0	220525Well 6	control	4	132.513	150.793	18.2809	1	0.00976923	1.47314	0.17859
2	0.0666667	220525Well 6	control	6	132.513	111.351	-21.1618	0	0.00976923	1.08781	-0.206734
3	0.133333	220525Well 6	control	5	132.513	116.372	-16.1408	0	0.00976923	1.13686	-0.157683
4	0.2	220525Well 6	control	4	132.513	114.493	-18.0196	0	0.00976923	1.11851	-0.176038
5	0.266667	220525Well 6	control	4	132.513	112.595	-19.9178	0	0.00976923	1.09996	-0.194582
6	0.333333	220525Well 6	control	5	132.513	114.615	-17.8973	0	0.00976923	1.1197	-0.174843
7	0.4	220525Well 6	control	5	132.513	117.297	-15.2157	0	0.00976923	1.1459	-0.148646
8	0.466667	220525Well 6	control	5	132.513	92.5812	-39.9313	0	0.00976923	0.904447	-0.390098
9	0.533333	220525Well 6	control	5	132.513	97.2158	-35.2967	0	0.00976923	0.949724	-0.344821
10	0.6	220525Well 6	control	7	132.513	102.764	-29.7486	0	0.00976923	1.00392	-0.290621
11	0.666667	220525Well 6	control	5	132.513	118.873	-13.6397	0	0.00976923	1.1613	-0.133249
12	0.733333	220525Well 6	control	6	132.513	110.325	-22.1874	0	0.00976923	1.07779	-0.216754
13	0.8	220525Well 6	control	5	132.513	102.754	-29.7588	0	0.00976923	1.00382	-0.290721
14	0.866667	220525Well 6	control	6	132.513	111.559	-20.9533	0	0.00976923	1.08985	-0.204698
15	0.933333	220525Well 6	control	5	132.513	114.341	-18.171	0	0.00976923	1.11703	-0.177517
16	1	220525Well 6	control	6	132.513	120.034	-12.4789	0	0.00976923	1.17264	-0.12191
17	1.06667	220525Well 6	control	5	132.513	107.917	-24.5955	0	0.00976923	1.05427	-0.240279
18	1.13333	220525Well 6	control	5	132.513	106.771	-25.7415	0	0.00976923	1.04307	-0.251475
19	1.2	220525Well 6	control	6	132.513	117.479	-15.0338	0	0.00976923	1.14768	-0.146869
20	1.26667	220525Well 6	control	7	132.513	117.179	-15.3331	0	0.00976923	1.14475	-0.149792
21	1.33333	220525Well 6	control	5	132.513	114.302	-18.2103	0	0.00976923	1.11664	-0.177901
22	1.4	220525Well 6	control	5	132.513	119.032	-13.4806	0	0.00976923	1.16285	-0.131696
23	1.46667	220525Well 6	control	6	132.513	117.675	-14.8379	0	0.00976923	1.14959	-0.144954
24	1.53333	220525Well 6	control	5	132.513	118.323	-14.1891	0	0.00976923	1.15593	-0.138616
25	1.6	220525Well 6	control	6	132.513	120.307	-12.2056	0	0.00976923	1.17531	-0.11924
26	1.66667	220525Well 6	control	7	132.513	121.787	-10.7254	0	0.00976923	1.18977	-0.104779
27	1.73333	220525Well 6	control	5	132.513	118.153	-14.3597	0	0.00976923	1.15426	-0.140283
28	1.8	220525Well 6	control	6	132.513	120.006	-12.5069	0	0.00976923	1.17236	-0.122183
29	1.86667	220525Well 6	control	6	132.513	119.681	-12.8319	0	0.00976923	1.16919	-0.125358
30	1.93333	220525Well 6	control	5	132.513	118.28	-14.2324	0	0.00976923	1.15551	-0.139039
31	2	220525Well 6	control	4	132.513	119.704	-12.8089	0	0.00976923	1.16941	-0.125133
32	2.06667	220525Well 6	control	4	132.513	116.486	-16.0265	0	0.00976923	1.13798	-0.156566
33	2.13333	220525Well 6	control	5	132.513	121.828	-10.6847	0	0.00976923	1.19016	-0.104381
34	2.2	220525Well 6	control	6	132.513	124.236	-8.27606	0	0.00976923	1.21369	-0.0808507
35	2.26667	220525Well 6	control	6	132.513	128.921	-3.5911	0	0.00976923	1.25946	-0.0350822
36	2.33333	220525Well 6	control	7	132.513	124.213	-8.29989	0	0.00976923	1.21346	-0.0810835
37	2.4	220525Well 6	control	5	132.513	129.678	-2.83485	0	0.00976923	1.26685	-0.0276943
38	2.46667	220525Well 6	control	6	132.513	130.269	-2.24366	0	0.00976923	1.27263	-0.0219188
39	2.53333	220525Well 6	control	6	132.513	129.447	-3.06576	0	0.00976923	1.2646	-0.0299501
40	2.6	220525Well 6	control	6	132.513	126.741	-5.77175	0	0.00976923	1.23816	-0.0563856
41	2.66667	220525Well 6	control	4	132.513	133.545	1.03261	1	0.00976923	1.30463	0.0100878
42	2.73333	220525Well 6	control	4	132.513	126.493	-6.01972	0	0.00976923	1.23574	-0.058808
43	2.8	220525Well 6	control	6	132.513	129.599	-2.91323	0	0.00976923	1.26609	-0.02846
44	2.86667	220525Well 6	control	5	132.513	127.98	-4.53297	0	0.00976923	1.25026	-0.0442837
45	2.93333	220525Well 6	control	5	132.513	120.759	-11.7533	0	0.00976923	1.17972	-0.11482
46	3	220525Well 6	control	6	132.513	117.681	-14.831	0	0.00976923	1.14966	-0.144888
47	3.06667	220525Well 6	control	6	132.513	116.801	-15.7116	0	0.00976923	1.14106	-0.15349
48	3.13333	220525Well 6	control	7	132.513	115.86	-16.6525	0	0.00976923	1.13186	-0.162682
49	3.2	220525Well 6	control	6	132.513	115.225	-17.2879	0	0.00976923	1.12566	-0.16889
50	3.26667	220525Well 6	control	6	132.513	119.078	-13.4341	0	0.00976923	1.1633	-0.131241
51	3.33333	220525Well 6	control	5	132.513	116.907	-15.6059	0	0.00976923	1.14209	-0.152458
52	3.4	220525Well 6	control	5	132.513	122.63	-9.88296	0	0.00976923	1.198	-0.096549
53	3.46667	220525Well 6	control	5	132.513	122.648	-9.86484	0	0.00976923	1.19817	-0.0963719
54	3.53333	220525Well 6	control	4	132.513	121.273	-11.2393	0	0.00976923	1.18475	-0.109799
55	3.6	220525Well 6	control	5	132.513	123.21	-9.30289	0	0.00976923	1.20366	-0.0908821
56	3.66667	220525Well 6	control	6	132.513	122.77	-9.74283	0	0.00976923	1.19937	-0.09518
57	3.73333	220525Well 6	control	5	132.513	124.916	-7.59633	0	0.00976923	1.22033	-0.0742103
58	3.8	220525Well 6	control	6	132.513	116.38	-16.1328	0	0.00976923	1.13694	-0.157605
59	3.86667	220525Well 6	control	6	132.513	119.55	-12.9625	0	0.00976923	1.16791	-0.126634
60	3.93333	220525Well 6	control	6	132.513	115.37	-17.1429	0	0.00976923	1.12707	-0.167473
61	4	220525Well 6	control	6	132.513	117.057	-15.4556	0	0.00976923	1.14356	-0.150989
62	4.06667	220525Well 6	control	6	132.513	116.22	-16.2927	0	0.00976923	1.13538	-0.159167
63	4.13333	220525Well 6	control	6	132.513	114.494	-18.0189	0	0.00976923	1.11851	-0.176031
64	4.2	220525Well 6	control	5	132.513	106.962	-25.5503	0	0.00976923	1.04494	-0.249607
65	4.26667	220525Well 6	control	5	132.513	103.846	-28.6667	0	0.00976923	1.01449	-0.280051
66	4.33333	220525Well 6	control	6	132.513	108.363	-24.1499	0	0.00976923	1.05862	-0.235926
67	4.4	220525Well 6	control	6	132.513	120.715	-11.7975	0	0.00976923	1.17929	-0.115252
68	4.46667	220525Well 6	control	7	132.513	112.389	-20.1233	0	0.00976923	1.09796	-0.196589
69	4.53333	220525Well 6	control	7	132.513	101.382	-31.13	0	0.00976923	0.990429	-0.304117
70	4.6	220525Well 6	control	7	132.513	109.001	-23.5113	0	0.00976923	1.06486	-0.229687
71	4.66667	220525Well 6	control	7	132.513	116.676	-15.8367	0	0.00976923	1.13983	-0.154712
72	4.73333	220525Well 6	control	5	132.513	112.119	-20.3931	0	0.00976923	1.09532	-0.199225
73	4.8	220525Well 6	control	7	132.513	107.875	-24.6371	0	0.00976923	1.05386	-0.240686
74	4.86667	220525Well 6	control	7	132.513	107.961	-24.5518	0	0.00976923	1.05469	-0.239852
75	4.93333	220525Well 6	control	5	132.513	102.349	-30.1636	0	0.00976923	0.99987	-0.294675
76	5	220525Well 6	control	6	132.513	97.8436	-34.6689	0	0.00976923	0.955856	-0.338689
77	5.06667	220525Well 6	control	6	132.513	95.939	-36.5736	0	0.00976923	0.93725	-0.357295
78	5.13333	220525Well 6	control	6	132.513	93.7994	-38.7131	0	0.00976923	0.916348	-0.378197
79	5.2	220525Well 6	control	6	132.513	87.492	-45.0205	0	0.00976923	0.85473	-0.439816
80	5.26667	220525Well 6	control	7	132.513	82.1461	-50.3664	0	0.00976923	0.802504	-0.492041
81	5.33333	220525Well 6	control	6	132.513	83.1209	-49.3916	0	0.00976923	0.812028	-0.482518
82	5.4	220525Well 6	control	6	132.513	74.1311	-58.3814	0	0.00976923	0.724204	-0.570341
83	5.46667	220525Well 6	control	6	132.513	75.7531	-56.7594	0	0.00976923	0.74005	-0.554495
84	5.53333	220525Well 6	control	6	132.513	75.7946	-56.7179	0	0.00976923	0.740455	-0.554091
85	5.6	220525Well 6	control	6	132.513	89.2864	-43.2262	0	0.00976923	0.872259	-0.422286
86	5.66667	220525Well 6	control	6	132.513	88.2297	-44.2828	0	0.00976923	0.861937	-0.432609
87	5.73333	220525Well 6	control	9	132.513	81.1537	-51.3588	0	0.00976923	0.792809	-0.501736
88	5.8	220525Well 6	control	8	132.513	76.8548	-55.6577	0	0.00976923	0.750812	-0.543733
89	5.86667	220525Well 6	control	6	132.513	79.6117	-52.9008	0	0.00976923	0.777745	-0.5168
90	5.93333	220525Well 6	control	7	132.513	82.5875	-49.925	0	0.00976923	0.806816	-0.487729
91	6	220525Well 6	control	6	132.513	90.052	-42.4605	0	0.00976923	0.879738	-0.414807
92	6.06667	220525Well 6	control	6	132.513	96.5808	-35.9318	0	0.00976923	0.94352	-0.351026
93	6.13333	220525Well 6	control	6	132.513	97.7314	-34.7811	0	0.00976923	0.954761	-0.339785
94	6.2	220525Well 6	control	6	132.513	106.519	-25.9933	0	0.00976923	1.04061	-0.253934
95	6.26667	220525Well 6	control	6	132.513	98.913	-33.5996	0	0.00976923	0.966303	-0.328242
96	6.33333	220525Well 6	control	7	132.513	99.7206	-32.7919	0	0.00976923	0.974193	-0.320352
97	6.4	220525Well 6	control	6	132.513	102.166	-30.3465	0	0.00976923	0.998084	-0.296462
98	6.46667	220525Well 6	control	6	132.513	104.215	-28.2974	0	0.00976923	1.0181	-0.276444
99	6.53333	220525Well 6	control	6	132.513	107.041	-25.4713	0	0.00976923	1.04571	-0.248835
100	6.6	220525Well 6	control	7	132.513	106.823	-25.6894	0	0.00976923	1.04358	-0.250965
101	6.66667	220525Well 6	control	6	132.513	105.611	-26.902	0	0.00976923	1.03173	-0.262812
102	6.73333	220525Well 6	control	6	132.513	102.028	-30.4845	0	0.00976923	0.996736	-0.29781
103	6.8	220525Well 6	control	6	132.513	93.3012	-39.2113	0	0.00976923	0.911481	-0.383064
104	6.86667	220525Well 6	control	5	132.513	98.1545	-34.3581	0	0.00976923	0.958893	-0.335652
105	6.93333	220525Well 6	control	6	132.513	90.5747	-41.9378	0	0.00976923	0.884845	-0.4097
106	7	220525Well 6	control	6	132.513	86.1652	-46.3473	0	0.00976923	0.841768	-0.452777
107	7.06667	220525Well 6	control	6	132.513	81.7406	-50.7719	0	0.00976923	0.798543	-0.496002
108	7.13333	220525Well 6	control	6	132.513	77.1707	-55.3418	0	0.00976923	0.753898	-0.540647
109	7.2	220525Well 6	control	7	132.513	84.927	-47.5855	0	0.00976923	0.829672	-0.464873
110	7.26667	220525Well 6	control	6	132.513	93.9211	-38.5915	0	0.00976923	0.917536	-0.377009
111	7.33333	220525Well 6	control	6	132.513	98.6196	-33.8929	0	0.00976923	0.963438	-0.331107
112	7.4	220525Well 6	control	7	132.513	93.0149	-39.4976	0	0.00976923	0.908684	-0.385861
113	7.46667	220525Well 6	control	6	132.513	95.4433	-37.0692	0	0.00976923	0.932408	-0.362137
114	7.53333	220525Well 6	control	6	132.513	105.409	-27.1037	0	0.00976923	1.02976	-0.264783
115	7.6	220525Well 6	control	6	132.513	104.539	-27.9733	0	0.00976923	1.02127	-0.273278
116	7.66667	220525Well 6	control	6	132.513	105.625	-26.8877	0	0.00976923	1.03187	-0.262673
117	7.73333	220525Well 6	control	6	132.513	102.615	-29.8975	0	0.00976923	1.00247	-0.292075
118	7.8	220525Well 6	control	6	132.513	88.1319	-44.3806	0	0.00976923	0.860981	-0.433565
119	7.86667	220525Well 6	control	7	132.513	88.4275	-44.085	0	0.00976923	0.863869	-0.430677
120	7.93333	220525Well 6	control	6	132.513	91.937	-40.5755	0	0.00976923	0.898154	-0.396392
121	8	220525Well 6	control	7	132.513	80.5191	-51.9934	0	0.00976923	0.78661	-0.507935
122	8.06667	220525Well 6	control	7	132.513	83.1515	-49.361	0	0.00976923	0.812326	-0.482219
123	8.13333	220525Well 6	control	6	132.513	80.4307	-52.0818	0	0.00976923	0.785746	-0.508799
124	8.2	220525Well 6	control	8	132.513	90.7284	-41.7842	0	0.00976923	0.886346	-0.408199
125	8.26667	220525Well 6	control	6	132.513	76.8621	-55.6505	0	0.00976923	0.750883	-0.543662
126	8.33333	220525Well 6	control	6	132.513	66.5047	-66.0078	0	0.00976923	0.6497	-0.644846
127	8.4	220525Well 6	control	6	132.513	81.6162	-50.8963	0	0.00976923	0.797327	-0.497218
128	8.46667	220525Well 6	control	6	132.513	78.1413	-54.3712	0	0.00976923	0.763381	-0.531165
129	8.53333	220525Well 6	control	6	132.513	70.9622	-61.5503	0	0.00976923	0.693246	-0.601299
130	8.6	220525Well 6	control	6	132.513	75.1594	-57.3531	0	0.00976923	0.734249	-0.560296
131	8.66667	220525Well 6	control	6	132.513	68.0632	-64.4493	0	0.00976923	0.664925	-0.62962
132	8.73333	220525Well 6	control	8	132.513	84.969	-47.5435	0	0.00976923	0.830082	-0.464463
133	8.8	220525Well 6	control	7	132.513	85.3843	-47.1282	0	0.00976923	0.834139	-0.460407
134	8.86667	220525Well 6	control	6	132.513	94.3904	-38.1221	0	0.00976923	0.922121	-0.372424
135	8.93333	220525Well 6	control	7	132.513	92.585	-39.9275	0	0.00976923	0.904484	-0.390061
136	9	220525Well 6	control	6	132.513	95.0447	-37.4678	0	0.00976923	0.928513	-0.366032
137	9.06667	220525Well 6	control	6	132.513	94.9541	-37.5584	0	0.00976923	0.927628	-0.366917
138	9.13333	220525Well 6	control	6	132.513	96.848	-35.6645	0	0.00976923	0.946131	-0.348415
139	9.2	220525Well 6	control	6	132.513	101.286	-31.2266	0	0.00976923	0.989485	-0.30506
140	9.26667	220525Well 6	control	6	132.513	100.811	-31.701	0	0.00976923	0.984851	-0.309695
141	9.33333	220525Well 6	control	6	132.513	104.005	-28.5076	0	0.00976923	1.01605	-0.278497
142	9.4	220525Well 6	control	6	132.513	89.086	-43.4265	0	0.00976923	0.870301	-0.424244
143	9.46667	220525Well 6	control	6	132.513	81.723	-50.7895	0	0.00976923	0.798371	-0.496174
144	9.53333	220525Well 6	control	6	132.513	96.6441	-35.8685	0	0.00976923	0.944138	-0.350407
145	9.6	220525Well 6	control	6	132.513	96.8484	-35.6641	0	0.00976923	0.946134	-0.348411
146	9.66667	220525Well 6	control	6	132.513	89.7845	-42.728	0	0.00976923	0.877126	-0.417419
147	9.73333	220525Well 6	control	6	132.513	73.1152	-59.3973	0	0.00976923	0.714279	-0.580266
148	9.8	220525Well 6	control	5	132.513	81.3874	-51.1251	0	0.00976923	0.795092	-0.499453
149	9.86667	220525Well 6	control	7	132.513	83.8732	-48.6393	0	0.00976923	0.819377	-0.475168
150	9.93333	220525Well 6	control	7	132.513	79.4839	-53.0287	0	0.00976923	0.776496	-0.518049
151	10	220525Well 6	control	7	132.513	80.6797	-51.8328	0	0.00976923	0.788178	-0.506367
152	10.0667	220525Well 6	control	6	132.513	74.7883	-57.7242	0	0.00976923	0.730624	-0.563921
153	10.1333	220525Well 6	control	6	132.513	82.0695	-50.443	0	0.00976923	0.801756	-0.49279
154	10.2	220525Well 6	control	6	132.513	99.3784	-33.1341	0	0.00976923	0.97085	-0.323695
155	10.2667	220525Well 6	control	6	132.513	101.112	-31.4005	0	0.00976923	0.987787	-0.306758
156	10.3333	220525Well 6	control	7	132.513	94.3664	-38.1462	0	0.00976923	0.921887	-0.372659
157	10.4	220525Well 6	control	6	132.513	108.953	-23.5599	0	0.00976923	1.06438	-0.230162
158	10.4667	220525Well 6	control	6	132.513	112.951	-19.5618	0	0.00976923	1.10344	-0.191104
159	10.5333	220525Well 6	control	6	132.513	107.017	-25.496	0	0.00976923	1.04547	-0.249076
160	10.6	220525Well 6	control	6	132.513	98.9683	-33.5442	0	0.00976923	0.966845	-0.327701
161	10.6667	220525Well 6	control	5	132.513	113.578	-18.9346	0	0.00976923	1.10957	-0.184976
162	10.7333	220525Well 6	control	6	132.513	96.6869	-35.8256	0	0.00976923	0.944557	-0.349989
163	10.8	220525Well 6	control	6	132.513	99.958	-32.5545	0	0.00976923	0.976513	-0.318032
164	10.8667	220525Well 6	control	6	132.513	90.5405	-41.972	0	0.00976923	0.884511	-0.410034
165	10.9333	220525Well 6	control	6	132.513	96.1667	-36.3458	0	0.00976923	0.939475	-0.355071
166	11	220525Well 6	control	7	132.513	98.5202	-33.9923	0	0.00976923	0.962467	-0.332079
167	11.0667	220525Well 6	control	6	132.513	85.7274	-46.7851	0	0.00976923	0.837491	-0.457054
168	11.1333	220525Well 6	control	6	132.513	99.172	-33.3405	0	0.00976923	0.968834	-0.325711
169	11.2	220525Well 6	control	6	132.513	99.646	-32.8665	0	0.00976923	0.973465	-0.321081
170	11.2667	220525Well 6	control	6	132.513	105.228	-27.2846	0	0.00976923	1.028	-0.266549
171	11.3333	220525Well 6	control	6	132.513	97.2312	-35.2813	0	0.00976923	0.949874	-0.344671
172	11.4	220525Well 6	control	6	132.513	127.472	-5.04068	0	0.00976923	1.2453	-0.0492436
173	11.4667	220525Well 6	control	6	132.513	101.866	-30.6466	0	0.00976923	0.995152	-0.299394
174	11.5333	220525Well 6	control	6	132.513	91.3189	-41.1936	0	0.00976923	0.892115	-0.40243
175	11.6	220525Well 6	control	6	132.513	92.4952	-40.0173	0	0.00976923	0.903607	-0.390938
176	11.6667	220525Well 6	control	5	132.513	112.265	-20.2478	0	0.00976923	1.09674	-0.197805
177	11.7333	220525Well 6	control	6	132.513	102.779	-29.7338	0	0.00976923	1.00407	-0.290477
178	11.8	220525Well 6	control	6	132.513	113.124	-19.3888	0	0.00976923	1.10513	-0.189414
179	11.8667	220525Well 6	control	6	132.513	111.503	-21.0096	0	0.00976923	1.0893	-0.205248
180	11.9333	220525Well 6	control	6	132.513	105.721	-26.7912	0	0.00976923	1.03282	-0.26173
181	12	220525Well 6	control	6	132.513	119.579	-12.9334	0	0.00976923	1.1682	-0.12635
182	12.0667	220525Well 6	control	6	132.513	100.812	-31.7003	0	0.00976923	0.984858	-0.309688
183	12.1333	220525Well 6	control	6	132.513	88.4709	-44.0416	0	0.00976923	0.864293	-0.430252
184	12.2	220525Well 6	control	6	132.513	92.9578	-39.5547	0	0.00976923	0.908126	-0.386419
185	12.2667	220525Well 6	control	6	132.513	93.6962	-38.8163	0	0.00976923	0.91534	-0.379205
186	12.3333	220525Well 6	control	5	132.513	110.989	-21.5235	0	0.00976923	1.08428	-0.210268
187	12.4	220525Well 6	control	6	132.513	115.611	-16.901	0	0.00976923	1.12944	-0.16511
188	12.4667	220525Well 6	control	6	132.513	92.0133	-40.4992	0	0.00976923	0.898899	-0.395646
189	12.5333	220525Well 6	control	5	132.513	84.4258	-48.0867	0	0.00976923	0.824775	-0.46977
190	12.6	220525Well 6	control	6	132.513	76.0847	-56.4278	0	0.00976923	0.743289	-0.551256
191	12.6667	220525Well 6	control	6	132.513	74.0805	-58.432	0	0.00976923	0.723709	-0.570836
192	12.7333	220525Well 6	control	7	132.513	82.9572	-49.5553	0	0.00976923	0.810428	-0.484117
193	12.8	220525Well 6	control	6	132.513	86.228	-46.2845	0	0.00976923	0.842381	-0.452164
194	12.8667	220525Well 6	control	6	132.513	83.8312	-48.6813	0	0.00976923	0.818966	-0.475579
195	12.9333	220525Well 6	control	7	132.513	110.775	-21.737	0	0.00976923	1.08219	-0.212354
196	13	220525Well 6	control	6	132.513	115.041	-17.4719	0	0.00976923	1.12386	-0.170687
197	13.0667	220525Well 6	control	6	132.513	116.837	-15.6751	0	0.00976923	1.14141	-0.153134
198	13.1333	220525Well 6	control	6	132.513	110.967	-21.5455	0	0.00976923	1.08406	-0.210483
199	13.2	220525Well 6	control	6	132.513	114.361	-18.1517	0	0.00976923	1.11722	-0.177328
200	13.2667	220525Well 6	control	6	132.513	108.773	-23.7395	0	0.00976923	1.06263	-0.231917
201	13.3333	220525Well 6	control	6	132.513	105.309	-27.2036	0	0.00976923	1.02879	-0.265758
202	13.4	220525Well 6	control	6	132.513	111.375	-21.137	0	0.00976923	1.08805	-0.206493
203	13.4667	220525Well 6	control	6	132.513	106.93	-25.5823	0	0.00976923	1.04463	-0.24992
204	13.5333	220525Well 6	control	6	132.513	102.568	-29.9443	0	0.00976923	1.00201	-0.292532
205	13.6	220525Well 6	control	7	132.513	111.581	-20.9311	0	0.00976923	1.09006	-0.20448
206	13.6667	220525Well 6	control	6	132.513	102.088	-30.4249	0	0.00976923	0.997318	-0.297228
207	13.7333	220525Well 6	control	6	132.513	105.589	-26.9236	0	0.00976923	1.03152	-0.263023
208	13.8	220525Well 6	control	6	132.513	108.685	-23.8276	0	0.00976923	1.06177	-0.232777
209	13.8667	220525Well 6	control	6	132.513	105.429	-27.0836	0	0.00976923	1.02996	-0.264586
210	13.9333	220525Well 6	control	6	132.513	96.501	-36.0115	0	0.00976923	0.942741	-0.351805
211	14	220525Well 6	control	6	132.513	108.014	-24.4985	0	0.00976923	1.05521	-0.239331
212	14.0667	220525Well 6	control	6	132.513	101.927	-30.586	0	0.00976923	0.995744	-0.298802
213	14.1333	220525Well 6	control	6	132.513	95.99	-36.5225	0	0.00976923	0.937748	-0.356797
214	14.2	220525Well 6	control	6	132.513	91.6634	-40.8491	0	0.00976923	0.895481	-0.399064
215	14.2667	220525Well 6	control	7	132.513	92.4582	-40.0543	0	0.00976923	0.903245	-0.3913
216	14.3333	220525Well 6	control	8	132.513	73.8907	-58.6218	0	0.00976923	0.721855	-0.57269
217	14.4	220525Well 6	control	6	132.513	76.604	-55.9086	0	0.00976923	0.748362	-0.546184
218	14.4667	220525Well 6	control	6	132.513	86.6512	-45.8613	0	0.00976923	0.846516	-0.448029
219	14.5333	220525Well 6	control	6	132.513	88.5971	-43.9154	0	0.00976923	0.865525	-0.42902
220	14.6	220525Well 6	control	6	132.513	96.5863	-35.9262	0	0.00976923	0.943573	-0.350972
221	14.6667	220525Well 6	control	6	132.513	123.504	-9.00831	0	0.00976923	1.20654	-0.0880043
222	14.7333	220525Well 6	control	5	132.513	105.806	-26.7064	0	0.00976923	1.03364	-0.260901
223	14.8	220525Well 6	control	7	132.513	114.262	-18.2502	0	0.00976923	1.11625	-0.17829
224	14.8667	220525Well 6	control	5	132.513	142.986	10.4733	1	0.00976923	1.39686	0.102316
225	14.9333	220525Well 6	control	6	132.513	108.551	-23.9613	0	0.00976923	1.06046	-0.234083
226	15	220525Well 6	control	6	132.513	97.8136	-34.6989	0	0.00976923	0.955564	-0.338981
227	15.0667	220525Well 6	control	6	132.513	85.2233	-47.2892	0	0.00976923	0.832566	-0.461979
228	15.1333	220525Well 6	control	7	132.513	92.2093	-40.3032	0	0.00976923	0.900814	-0.393731
229	15.2	220525Well 6	control	5	132.513	134.056	1.54386	1	0.00976923	1.30963	0.0150824
230	15.2667	220525Well 6	control	6	132.513	108.966	-23.547	0	0.00976923	1.06451	-0.230036
231	15.3333	220525Well 6	control	6	132.513	113.907	-18.6057	0	0.00976923	1.11278	-0.181763
232	15.4	220525Well 6	control	6	132.513	112.318	-20.1947	0	0.00976923	1.09726	-0.197287
233	15.4667	220525Well 6	control	8	132.513	96.8796	-35.6329	0	0.00976923	0.946439	-0.348106
234	15.5333	220525Well 6	control	7	132.513	100.964	-31.5484	0	0.00976923	0.986341	-0.308204
235	15.6	220525Well 6	control	6	132.513	108.859	-23.6536	0	0.00976923	1.06347	-0.231078
236	15.6667	220525Well 6	control	6	132.513	146.425	13.9125	1	0.00976923	1.43046	0.135914
237	15.7333	220525Well 6	control	6	132.513	152.433	19.9209	1	0.00976923	1.48916	0.194612
238	15.8	220525Well 6	control	6	132.513	156.635	24.1221	1	0.00976923	1.5302	0.235654
239	15.8667	220525Well 6	control	6	132.513	105.512	-27.0002	0	0.00976923	1.03077	-0.263772
240	15.9333	220525Well 6	control	6	132.513	100.606	-31.9065	0	0.00976923	0.982844	-0.311702
241	16	220525Well 6	control	6	132.513	124.723	-7.78906	0	0.00976923	1.21845	-0.0760931
242	16.0667	220525Well 6	control	6	132.513	156.194	23.6817	1	0.00976923	1.5259	0.231352
243	16.1333	220525Well 6	control	6	132.513	141.742	9.22949	1	0.00976923	1.38471	0.090165
244	16.2	220525Well 6	control	6	132.513	91.6643	-40.8482	0	0.00976923	0.895489	-0.399056
245	16.2667	220525Well 6	control	7	132.513	73.0352	-59.4773	0	0.00976923	0.713498	-0.581048
246	16.3333	220525Well 6	control	6	132.513	86.8276	-45.685	0	0.00976923	0.848238	-0.446307
247	16.4	220525Well 6	control	6	132.513	121.379	-11.1338	0	0.00976923	1.18578	-0.108768
248	16.4667	220525Well 6	control	6	132.513	128.783	-3.72979	0	0.00976923	1.25811	-0.0364371
249	16.5333	220525Well 6	control	6	132.513	111.85	-20.6627	0	0.00976923	1.09269	-0.201858
250	16.6	220525Well 6	control	6	132.513	121.825	-10.687	0	0.00976923	1.19014	-0.104404
251	16.6667	220525Well 6	control	6	132.513	117.224	-15.2881	0	0.00976923	1.14519	-0.149353
252	16.7333	220525Well 6	control	6	132.513	104.775	-27.7378	0	0.00976923	1.02357	-0.270977
253	16.8	220525Well 6	control	6	132.513	108.983	-23.5298	0	0.00976923	1.06468	-0.229868
254	16.8667	220525Well 6	control	6	132.513	134.6	2.08709	1	0.00976923	1.31493	0.0203892
255	16.9333	220525Well 6	control	5	132.513	138.791	6.27857	1	0.00976923	1.35588	0.0613368
256	17	220525Well 6	control	6	132.513	135.818	3.30573	1	0.00976923	1.32684	0.0322944
257	17.0667	220525Well 6	control	6	132.513	115.693	-16.8198	0	0.00976923	1.13023	-0.164316
258	17.1333	220525Well 6	control	6	132.513	111.298	-21.2145	0	0.00976923	1.0873	-0.20725
259	17.2	220525Well 6	control	7	132.513	107.186	-25.3262	0	0.00976923	1.04713	-0.247418
260	17.2667	220525Well 6	control	6	132.513	102.132	-30.3806	0	0.00976923	0.99775	-0.296795
261	17.3333	220525Well 6	control	6	132.513	109.632	-22.8806	0	0.00976923	1.07102	-0.223526
262	17.4	220525Well 6	control	9	132.513	115.419	-17.0933	0	0.00976923	1.12756	-0.166988
263	17.4667	220525Well 6	control	6	132.513	91.4771	-41.0354	0	0.00976923	0.893661	-0.400884
264	17.5333	220525Well 6	control	6	132.513	101.496	-31.0167	0	0.00976923	0.991536	-0.303009
265	17.6	220525Well 6	control	6	132.513	127.611	-4.9011	0	0.00976923	1.24667	-0.04788
266	17.6667	220525Well 6	control	6	132.513	107.657	-24.8551	0	0.00976923	1.05173	-0.242815
267	17.7333	220525Well 6	control	6	132.513	95.6065	-36.906	0	0.00976923	0.934002	-0.360543
268	17.8	220525Well 6	control	6	132.513	94.6274	-37.8851	0	0.00976923	0.924437	-0.370108
269	17.8667	220525Well 6	control	6	132.513	115.881	-16.6319	0	0.00976923	1.13206	-0.16248
270	17.9333	220525Well 6	control	6	132.513	103.923	-28.5896	0	0.00976923	1.01525	-0.279298
271	18	220525Well 6	control	6	132.513	97.3447	-35.1678	0	0.00976923	0.950983	-0.343562
272	18.0667	220525Well 6	control	6	132.513	90.9747	-41.5378	0	0.00976923	0.888753	-0.405792
273	18.1333	220525Well 6	control	6	132.513	91.7299	-40.7826	0	0.00976923	0.89613	-0.398415
274	18.2	220525Well 6	control	7	132.513	92.8006	-39.7119	0	0.00976923	0.90659	-0.387955
275	18.2667	220525Well 6	control	6	132.513	95.6819	-36.8306	0	0.00976923	0.934739	-0.359806
276	18.3333	220525Well 6	control	6	132.513	115.185	-17.3277	0	0.00976923	1.12527	-0.169278
277	18.4	220525Well 6	control	5	132.513	110.275	-22.2371	0	0.00976923	1.07731	-0.217239
278	18.4667	220525Well 6	control	6	132.513	104.636	-27.876	0	0.00976923	1.02222	-0.272327
279	18.5333	220525Well 6	control	7	132.513	87.1306	-45.3819	0	0.00976923	0.851199	-0.443346
280	18.6	220525Well 6	control	6	132.513	74.0222	-58.4903	0	0.00976923	0.72314	-0.571405
281	18.6667	220525Well 6	control	6	132.513	70.3108	-62.2017	0	0.00976923	0.686882	-0.607663
282	18.7333	220525Well 6	control	6	132.513	83.1818	-49.3307	0	0.00976923	0.812622	-0.481923
283	18.8	220525Well 6	control	6	132.513	102.25	-30.2629	0	0.00976923	0.9989	-0.295645
284	18.8667	220525Well 6	control	5	132.513	97.5982	-34.9143	0	0.00976923	0.953459	-0.341086
285	18.9333	220525Well 6	control	6	132.513	90.0446	-42.4679	0	0.00976923	0.879666	-0.414879
286	19	220525Well 6	control	6	132.513	88.6393	-43.8732	0	0.00976923	0.865938	-0.428608
287	19.0667	220525Well 6	control	6	132.513	100.348	-32.1645	0	0.00976923	0.980323	-0.314222
288	19.1333	220525Well 6	control	6	132.513	126.412	-6.10019	0	0.00976923	1.23495	-0.0595942
289	19.2	220525Well 6	control	7	132.513	112.08	-20.4324	0	0.00976923	1.09494	-0.199609
290	19.2667	220525Well 6	control	7	132.513	108.831	-23.6814	0	0.00976923	1.0632	-0.231349
291	19.3333	220525Well 6	control	6	132.513	123.551	-8.96163	0	0.00976923	1.207	-0.0875482
292	19.4	220525Well 6	control	6	132.513	101.111	-31.402	0	0.00976923	0.987772	-0.306773
293	19.4667	220525Well 6	control	7	132.513	73.5591	-58.9534	0	0.00976923	0.718616	-0.57593
294	19.5333	220525Well 6	control	6	132.513	125.807	-6.70583	0	0.00976923	1.22903	-0.0655108
295	19.6	220525Well 6	control	6	132.513	100.733	-31.7797	0	0.00976923	0.984082	-0.310464
296	19.6667	220525Well 6	control	7	132.513	90.3055	-42.207	0	0.00976923	0.882215	-0.41233
297	19.7333	220525Well 6	control	6	132.513	105.225	-27.2872	0	0.00976923	1.02797	-0.266575
298	19.8	220525Well 6	control	7	132.513	91.5231	-40.9894	0	0.00976923	0.89411	-0.400435
299	19.8667	220525Well 6	control	7	132.513	96.3678	-36.1447	0	0.00976923	0.94144	-0.353106
300	19.9333	220525Well 6	control	6	132.513	138.139	5.62671	1	0.00976923	1.34951	0.0549686
301	20	220525Well 6	control	6	132.513	142.585	10.0729	1	0.00976923	1.39295	0.0984048
1	0	220525Well 7	predator	3	112.506	139.652	27.1465	1	0.00976923	1.3643	0.2652
2	0.0666667	220525Well 7	predator	3	112.506	88.4474	-24.0586	0	0.00976923	0.864063	-0.235034
3	0.133333	220525Well 7	predator	3	112.506	93.9042	-18.6018	0	0.00976923	0.917372	-0.181725
4	0.2	220525Well 7	predator	3	112.506	86.2611	-26.2449	0	0.00976923	0.842705	-0.256392
5	0.266667	220525Well 7	predator	2	112.506	88.0965	-24.4095	0	0.00976923	0.860635	-0.238462
6	0.333333	220525Well 7	predator	2	112.506	95.6549	-16.8511	0	0.00976923	0.934474	-0.164622
7	0.4	220525Well 7	predator	3	112.506	92.626	-19.88	0	0.00976923	0.904885	-0.194212
8	0.466667	220525Well 7	predator	3	112.506	92.9612	-19.5448	0	0.00976923	0.908159	-0.190937
9	0.533333	220525Well 7	predator	3	112.506	92.4895	-20.0165	0	0.00976923	0.903551	-0.195545
10	0.6	220525Well 7	predator	4	112.506	102.854	-9.65243	0	0.00976923	1.0048	-0.0942968
11	0.666667	220525Well 7	predator	2	112.506	96.142	-16.364	0	0.00976923	0.939233	-0.159864
12	0.733333	220525Well 7	predator	3	112.506	92.5317	-19.9743	0	0.00976923	0.903963	-0.195134
13	0.8	220525Well 7	predator	3	112.506	96.4965	-16.0095	0	0.00976923	0.942696	-0.156401
14	0.866667	220525Well 7	predator	3	112.506	92.0791	-20.4269	0	0.00976923	0.899542	-0.199555
15	0.933333	220525Well 7	predator	2	112.506	86.1818	-26.3242	0	0.00976923	0.84193	-0.257167
16	1	220525Well 7	predator	2	112.506	96.4762	-16.0297	0	0.00976923	0.942499	-0.156598
17	1.06667	220525Well 7	predator	4	112.506	94.0984	-18.4076	0	0.00976923	0.919269	-0.179828
18	1.13333	220525Well 7	predator	2	112.506	97.006	-15.4999	0	0.00976923	0.947674	-0.151423
19	1.2	220525Well 7	predator	3	112.506	97.4399	-15.0661	0	0.00976923	0.951913	-0.147184
20	1.26667	220525Well 7	predator	3	112.506	97.6294	-14.8765	0	0.00976923	0.953765	-0.145332
21	1.33333	220525Well 7	predator	3	112.506	90.9089	-21.5971	0	0.00976923	0.88811	-0.210987
22	1.4	220525Well 7	predator	3	112.506	80.2798	-32.2262	0	0.00976923	0.784271	-0.314825
23	1.46667	220525Well 7	predator	3	112.506	86.6334	-25.8725	0	0.00976923	0.846342	-0.252755
24	1.53333	220525Well 7	predator	3	112.506	86.3548	-26.1512	0	0.00976923	0.84362	-0.255477
25	1.6	220525Well 7	predator	3	112.506	78.3271	-34.1789	0	0.00976923	0.765195	-0.333901
26	1.66667	220525Well 7	predator	3	112.506	102.554	-9.9524	0	0.00976923	1.00187	-0.0972273
27	1.73333	220525Well 7	predator	3	112.506	93.2202	-19.2857	0	0.00976923	0.91069	-0.188407
28	1.8	220525Well 7	predator	3	112.506	92.4491	-20.0569	0	0.00976923	0.903156	-0.19594
29	1.86667	220525Well 7	predator	3	112.506	93.5917	-18.9143	0	0.00976923	0.914319	-0.184778
30	1.93333	220525Well 7	predator	3	112.506	98.3643	-14.1417	0	0.00976923	0.960944	-0.138153
31	2	220525Well 7	predator	3	112.506	102.286	-10.2201	0	0.00976923	0.999255	-0.0998422
32	2.06667	220525Well 7	predator	3	112.506	97.3539	-15.152	0	0.00976923	0.951073	-0.148024
33	2.13333	220525Well 7	predator	3	112.506	105.046	-7.46028	0	0.00976923	1.02622	-0.0728812
34	2.2	220525Well 7	predator	3	112.506	100.589	-11.9167	0	0.00976923	0.982679	-0.116417
35	2.26667	220525Well 7	predator	3	112.506	96.7869	-15.719	0	0.00976923	0.945534	-0.153563
36	2.33333	220525Well 7	predator	2	112.506	100.607	-11.8988	0	0.00976923	0.982855	-0.116242
37	2.4	220525Well 7	predator	3	112.506	102.546	-9.95978	0	0.00976923	1.0018	-0.0972994
38	2.46667	220525Well 7	predator	3	112.506	104.671	-7.83451	0	0.00976923	1.02256	-0.0765372
39	2.53333	220525Well 7	predator	5	112.506	108.184	-4.32172	0	0.00976923	1.05688	-0.0422199
40	2.6	220525Well 7	predator	3	112.506	98.7305	-13.7755	0	0.00976923	0.964521	-0.134576
41	2.66667	220525Well 7	predator	3	112.506	99.2215	-13.2845	0	0.00976923	0.969318	-0.129779
42	2.73333	220525Well 7	predator	3	112.506	102.107	-10.3987	0	0.00976923	0.997509	-0.101587
43	2.8	220525Well 7	predator	3	112.506	109.56	-2.94563	0	0.00976923	1.07032	-0.0287766
44	2.86667	220525Well 7	predator	3	112.506	107.105	-5.40091	0	0.00976923	1.04633	-0.0527628
45	2.93333	220525Well 7	predator	3	112.506	104.935	-7.57073	0	0.00976923	1.02514	-0.0739602
46	3	220525Well 7	predator	3	112.506	97.4517	-15.0543	0	0.00976923	0.952028	-0.147069
47	3.06667	220525Well 7	predator	4	112.506	89.7452	-22.7608	0	0.00976923	0.876741	-0.222355
48	3.13333	220525Well 7	predator	2	112.506	94.432	-18.074	0	0.00976923	0.922528	-0.176569
49	3.2	220525Well 7	predator	3	112.506	80.4708	-32.0352	0	0.00976923	0.786138	-0.312959
50	3.26667	220525Well 7	predator	3	112.506	86.0886	-26.4173	0	0.00976923	0.84102	-0.258077
51	3.33333	220525Well 7	predator	3	112.506	84.6483	-27.8576	0	0.00976923	0.826949	-0.272148
52	3.4	220525Well 7	predator	3	112.506	90.7938	-21.7121	0	0.00976923	0.886986	-0.212111
53	3.46667	220525Well 7	predator	3	112.506	82.3612	-30.1448	0	0.00976923	0.804606	-0.294491
54	3.53333	220525Well 7	predator	3	112.506	92.0275	-20.4784	0	0.00976923	0.899038	-0.200058
55	3.6	220525Well 7	predator	3	112.506	88.9862	-23.5197	0	0.00976923	0.869327	-0.22977
56	3.66667	220525Well 7	predator	3	112.506	85.8044	-26.7016	0	0.00976923	0.838243	-0.260854
57	3.73333	220525Well 7	predator	3	112.506	87.9091	-24.5969	0	0.00976923	0.858804	-0.240293
58	3.8	220525Well 7	predator	3	112.506	90.7152	-21.7907	0	0.00976923	0.886218	-0.212879
59	3.86667	220525Well 7	predator	3	112.506	89.8917	-22.6143	0	0.00976923	0.878173	-0.220924
60	3.93333	220525Well 7	predator	3	112.506	88.947	-23.559	0	0.00976923	0.868944	-0.230153
61	4	220525Well 7	predator	3	112.506	90.3642	-22.1418	0	0.00976923	0.882789	-0.216308
62	4.06667	220525Well 7	predator	3	112.506	95.9991	-16.5068	0	0.00976923	0.937838	-0.161259
63	4.13333	220525Well 7	predator	3	112.506	101.026	-11.48	0	0.00976923	0.986946	-0.112151
64	4.2	220525Well 7	predator	3	112.506	101.267	-11.2393	0	0.00976923	0.989297	-0.109799
65	4.26667	220525Well 7	predator	3	112.506	95.7452	-16.7608	0	0.00976923	0.935356	-0.16374
66	4.33333	220525Well 7	predator	3	112.506	97.8293	-14.6767	0	0.00976923	0.955717	-0.14338
67	4.4	220525Well 7	predator	3	112.506	97.2253	-15.2807	0	0.00976923	0.949817	-0.14928
68	4.46667	220525Well 7	predator	3	112.506	87.6342	-24.8718	0	0.00976923	0.856119	-0.242978
69	4.53333	220525Well 7	predator	3	112.506	81.7115	-30.7945	0	0.00976923	0.798259	-0.300838
70	4.6	220525Well 7	predator	3	112.506	73.8928	-38.6132	0	0.00976923	0.721876	-0.377221
71	4.66667	220525Well 7	predator	3	112.506	71.4039	-41.102	0	0.00976923	0.697561	-0.401535
72	4.73333	220525Well 7	predator	3	112.506	73.6744	-38.8316	0	0.00976923	0.719742	-0.379354
73	4.8	220525Well 7	predator	3	112.506	74.3216	-38.1843	0	0.00976923	0.726065	-0.373032
74	4.86667	220525Well 7	predator	3	112.506	76.3218	-36.1841	0	0.00976923	0.745606	-0.353491
75	4.93333	220525Well 7	predator	3	112.506	76.3203	-36.1856	0	0.00976923	0.745591	-0.353506
76	5	220525Well 7	predator	3	112.506	94.7082	-17.7978	0	0.00976923	0.925226	-0.173871
77	5.06667	220525Well 7	predator	3	112.506	95.234	-17.272	0	0.00976923	0.930363	-0.168734
78	5.13333	220525Well 7	predator	3	112.506	100.302	-12.2043	0	0.00976923	0.979871	-0.119226
79	5.2	220525Well 7	predator	3	112.506	157.151	44.6453	1	0.00976923	1.53525	0.43615
80	5.26667	220525Well 7	predator	3	112.506	166.671	54.1653	1	0.00976923	1.62825	0.529153
81	5.33333	220525Well 7	predator	3	112.506	175.697	63.1909	1	0.00976923	1.71642	0.617327
82	5.4	220525Well 7	predator	3	112.506	172.978	60.4718	1	0.00976923	1.68986	0.590763
83	5.46667	220525Well 7	predator	3	112.506	174.187	61.6815	1	0.00976923	1.70168	0.602581
84	5.53333	220525Well 7	predator	3	112.506	184.684	72.1785	1	0.00976923	1.80422	0.705128
85	5.6	220525Well 7	predator	3	112.506	180.798	68.292	1	0.00976923	1.76626	0.667161
86	5.66667	220525Well 7	predator	3	112.506	170.262	57.7563	1	0.00976923	1.66333	0.564235
87	5.73333	220525Well 7	predator	3	112.506	167.677	55.1715	1	0.00976923	1.63808	0.538983
88	5.8	220525Well 7	predator	3	112.506	167.172	54.6659	1	0.00976923	1.63314	0.534044
89	5.86667	220525Well 7	predator	3	112.506	170.911	58.4048	1	0.00976923	1.66967	0.57057
90	5.93333	220525Well 7	predator	3	112.506	185.323	72.8167	1	0.00976923	1.81046	0.711363
91	6	220525Well 7	predator	3	112.506	189.51	77.004	1	0.00976923	1.85137	0.752269
92	6.06667	220525Well 7	predator	3	112.506	227.645	115.139	1	0.00976923	2.22392	1.12482
93	6.13333	220525Well 7	predator	3	112.506	240.949	128.443	1	0.00976923	2.35388	1.25479
94	6.2	220525Well 7	predator	3	112.506	191.177	78.6713	1	0.00976923	1.86766	0.768558
95	6.26667	220525Well 7	predator	3	112.506	196.552	84.0465	1	0.00976923	1.92017	0.821069
96	6.33333	220525Well 7	predator	3	112.506	192.792	80.2856	1	0.00976923	1.88343	0.784329
97	6.4	220525Well 7	predator	3	112.506	198.966	86.4597	1	0.00976923	1.94374	0.844645
98	6.46667	220525Well 7	predator	3	112.506	215.556	103.05	1	0.00976923	2.10582	1.00672
99	6.53333	220525Well 7	predator	3	112.506	219.807	107.301	1	0.00976923	2.14735	1.04825
100	6.6	220525Well 7	predator	3	112.506	236.065	123.559	1	0.00976923	2.30618	1.20708
101	6.66667	220525Well 7	predator	3	112.506	240.447	127.941	1	0.00976923	2.34898	1.24988
102	6.73333	220525Well 7	predator	3	112.506	249.293	136.787	1	0.00976923	2.4354	1.3363
103	6.8	220525Well 7	predator	3	112.506	238.26	125.754	1	0.00976923	2.32762	1.22852
104	6.86667	220525Well 7	predator	3	112.506	253.451	140.946	1	0.00976923	2.47603	1.37693
105	6.93333	220525Well 7	predator	3	112.506	210.778	98.2725	1	0.00976923	2.05914	0.960047
106	7	220525Well 7	predator	3	112.506	226.852	114.346	1	0.00976923	2.21617	1.11707
107	7.06667	220525Well 7	predator	3	112.506	188.824	76.3179	1	0.00976923	1.84466	0.745567
108	7.13333	220525Well 7	predator	3	112.506	195.895	83.3885	1	0.00976923	1.91374	0.814642
109	7.2	220525Well 7	predator	3	112.506	184.405	71.8995	1	0.00976923	1.8015	0.702403
110	7.26667	220525Well 7	predator	3	112.506	172.575	60.0691	1	0.00976923	1.68593	0.586829
111	7.33333	220525Well 7	predator	3	112.506	178.807	66.3011	1	0.00976923	1.74681	0.64771
112	7.4	220525Well 7	predator	3	112.506	160.812	48.306	1	0.00976923	1.57101	0.471912
113	7.46667	220525Well 7	predator	3	112.506	155.816	43.31	1	0.00976923	1.5222	0.423105
114	7.53333	220525Well 7	predator	3	112.506	179.438	66.9316	1	0.00976923	1.75297	0.65387
115	7.6	220525Well 7	predator	3	112.506	171.916	59.4101	1	0.00976923	1.67949	0.580391
116	7.66667	220525Well 7	predator	3	112.506	169.329	56.8232	1	0.00976923	1.65422	0.555119
117	7.73333	220525Well 7	predator	3	112.506	169.481	56.9747	1	0.00976923	1.6557	0.556599
118	7.8	220525Well 7	predator	3	112.506	173.409	60.9029	1	0.00976923	1.69407	0.594974
119	7.86667	220525Well 7	predator	3	112.506	183.516	71.0103	1	0.00976923	1.79281	0.693716
120	7.93333	220525Well 7	predator	3	112.506	180.065	67.5592	1	0.00976923	1.7591	0.660001
121	8	220525Well 7	predator	3	112.506	184.99	72.484	1	0.00976923	1.80721	0.708113
122	8.06667	220525Well 7	predator	4	112.506	161.66	49.1536	1	0.00976923	1.57929	0.480193
123	8.13333	220525Well 7	predator	3	112.506	172.015	59.5094	1	0.00976923	1.68046	0.581361
124	8.2	220525Well 7	predator	3	112.506	188.984	76.4778	1	0.00976923	1.84623	0.74713
125	8.26667	220525Well 7	predator	3	112.506	178.778	66.2723	1	0.00976923	1.74653	0.647429
126	8.33333	220525Well 7	predator	3	112.506	188.404	75.8982	1	0.00976923	1.84056	0.741467
127	8.4	220525Well 7	predator	3	112.506	200.654	88.1483	1	0.00976923	1.96024	0.861141
128	8.46667	220525Well 7	predator	3	112.506	223.791	111.285	1	0.00976923	2.18627	1.08717
129	8.53333	220525Well 7	predator	3	112.506	221.231	108.725	1	0.00976923	2.16126	1.06216
130	8.6	220525Well 7	predator	3	112.506	185.957	73.4515	1	0.00976923	1.81666	0.717564
131	8.66667	220525Well 7	predator	3	112.506	204.233	91.7271	1	0.00976923	1.9952	0.896103
132	8.73333	220525Well 7	predator	3	112.506	227.682	115.176	1	0.00976923	2.22428	1.12518
133	8.8	220525Well 7	predator	3	112.506	226.336	113.83	1	0.00976923	2.21113	1.11203
134	8.86667	220525Well 7	predator	3	112.506	197.754	85.2478	1	0.00976923	1.9319	0.832806
135	8.93333	220525Well 7	predator	3	112.506	222.587	110.081	1	0.00976923	2.17451	1.07541
136	9	220525Well 7	predator	3	112.506	272.481	159.975	1	0.00976923	2.66193	1.56283
137	9.06667	220525Well 7	predator	3	112.506	259.184	146.678	1	0.00976923	2.53203	1.43293
138	9.13333	220525Well 7	predator	3	112.506	231.861	119.355	1	0.00976923	2.26511	1.16601
139	9.2	220525Well 7	predator	3	112.506	218.854	106.348	1	0.00976923	2.13804	1.03894
140	9.26667	220525Well 7	predator	3	112.506	181.604	69.098	1	0.00976923	1.77413	0.675035
141	9.33333	220525Well 7	predator	3	112.506	240.612	128.106	1	0.00976923	2.3506	1.2515
142	9.4	220525Well 7	predator	3	112.506	196.921	84.4147	1	0.00976923	1.92376	0.824667
143	9.46667	220525Well 7	predator	3	112.506	170.56	58.0538	1	0.00976923	1.66624	0.567141
144	9.53333	220525Well 7	predator	3	112.506	178.713	66.2073	1	0.00976923	1.74589	0.646795
145	9.6	220525Well 7	predator	3	112.506	206.501	93.9955	1	0.00976923	2.01736	0.918264
146	9.66667	220525Well 7	predator	3	112.506	232.089	119.583	1	0.00976923	2.26733	1.16823
147	9.73333	220525Well 7	predator	3	112.506	209.032	96.5256	1	0.00976923	2.04208	0.942981
148	9.8	220525Well 7	predator	3	112.506	192.751	80.245	1	0.00976923	1.88303	0.783932
149	9.86667	220525Well 7	predator	3	112.506	185.016	72.5099	1	0.00976923	1.80746	0.708366
150	9.93333	220525Well 7	predator	3	112.506	237.567	125.061	1	0.00976923	2.32085	1.22175
151	10	220525Well 7	predator	3	112.506	232.962	120.456	1	0.00976923	2.27586	1.17676
152	10.0667	220525Well 7	predator	3	112.506	216.321	103.815	1	0.00976923	2.11329	1.01419
153	10.1333	220525Well 7	predator	3	112.506	217.91	105.404	1	0.00976923	2.12881	1.02972
154	10.2	220525Well 7	predator	3	112.506	207.231	94.7253	1	0.00976923	2.02449	0.925393
155	10.2667	220525Well 7	predator	3	112.506	229.626	117.12	1	0.00976923	2.24327	1.14417
156	10.3333	220525Well 7	predator	3	112.506	180.236	67.73	1	0.00976923	1.76077	0.66167
157	10.4	220525Well 7	predator	3	112.506	146.996	34.4901	1	0.00976923	1.43604	0.336942
158	10.4667	220525Well 7	predator	3	112.506	166.749	54.2429	1	0.00976923	1.62901	0.529911
159	10.5333	220525Well 7	predator	3	112.506	156.053	43.5474	1	0.00976923	1.52452	0.425425
160	10.6	220525Well 7	predator	3	112.506	167.569	55.0634	1	0.00976923	1.63702	0.537927
161	10.6667	220525Well 7	predator	3	112.506	150.566	38.0603	1	0.00976923	1.47092	0.37182
162	10.7333	220525Well 7	predator	3	112.506	129.209	16.7031	1	0.00976923	1.26227	0.163176
163	10.8	220525Well 7	predator	3	112.506	178.037	65.5314	1	0.00976923	1.73929	0.640191
164	10.8667	220525Well 7	predator	3	112.506	246.375	133.869	1	0.00976923	2.40689	1.3078
165	10.9333	220525Well 7	predator	3	112.506	215.928	103.422	1	0.00976923	2.10945	1.01035
166	11	220525Well 7	predator	3	112.506	211.663	99.1566	1	0.00976923	2.06778	0.968684
167	11.0667	220525Well 7	predator	3	112.506	234.057	121.551	1	0.00976923	2.28656	1.18746
168	11.1333	220525Well 7	predator	3	112.506	172.671	60.1652	1	0.00976923	1.68686	0.587768
169	11.2	220525Well 7	predator	3	112.506	145.928	33.4218	1	0.00976923	1.4256	0.326506
170	11.2667	220525Well 7	predator	3	112.506	188.047	75.5407	1	0.00976923	1.83707	0.737975
171	11.3333	220525Well 7	predator	3	112.506	260.646	148.14	1	0.00976923	2.54631	1.44721
172	11.4	220525Well 7	predator	3	112.506	246.28	133.774	1	0.00976923	2.40597	1.30687
173	11.4667	220525Well 7	predator	3	112.506	234.796	122.29	1	0.00976923	2.29378	1.19468
174	11.5333	220525Well 7	predator	3	112.506	220.46	107.954	1	0.00976923	2.15372	1.05463
175	11.6	220525Well 7	predator	3	112.506	191.262	78.7565	1	0.00976923	1.86849	0.76939
176	11.6667	220525Well 7	predator	3	112.506	176.663	64.1575	1	0.00976923	1.72587	0.626769
177	11.7333	220525Well 7	predator	3	112.506	235.595	123.089	1	0.00976923	2.30159	1.20249
178	11.8	220525Well 7	predator	3	112.506	193.394	80.8876	1	0.00976923	1.88931	0.79021
179	11.8667	220525Well 7	predator	3	112.506	181.302	68.7958	1	0.00976923	1.77118	0.672082
180	11.9333	220525Well 7	predator	3	112.506	208.041	95.5349	1	0.00976923	2.0324	0.933303
181	12	220525Well 7	predator	3	112.506	186.834	74.3278	1	0.00976923	1.82522	0.726126
182	12.0667	220525Well 7	predator	3	112.506	186.817	74.3106	1	0.00976923	1.82505	0.725958
183	12.1333	220525Well 7	predator	3	112.506	187.493	74.987	1	0.00976923	1.83166	0.732565
184	12.2	220525Well 7	predator	3	112.506	177.527	65.0214	1	0.00976923	1.73431	0.635209
185	12.2667	220525Well 7	predator	3	112.506	186.528	74.0218	1	0.00976923	1.82223	0.723136
186	12.3333	220525Well 7	predator	3	112.506	163.975	51.4694	1	0.00976923	1.60191	0.502816
187	12.4	220525Well 7	predator	3	112.506	174.952	62.446	1	0.00976923	1.70915	0.610049
188	12.4667	220525Well 7	predator	3	112.506	171.217	58.7111	1	0.00976923	1.67266	0.573562
189	12.5333	220525Well 7	predator	3	112.506	198.779	86.2733	1	0.00976923	1.94192	0.842824
190	12.6	220525Well 7	predator	3	112.506	192.242	79.7356	1	0.00976923	1.87805	0.778956
191	12.6667	220525Well 7	predator	3	112.506	217.401	104.895	1	0.00976923	2.12384	1.02474
192	12.7333	220525Well 7	predator	3	112.506	200.549	88.0428	1	0.00976923	1.95921	0.860111
193	12.8	220525Well 7	predator	3	112.506	227.183	114.677	1	0.00976923	2.2194	1.1203
[truncated: 5,237 more rows]
