# Supplementary material for: Dopamine signaling regulates predator-driven changes in Caenorhabditis elegans’ egg laying behavior
Source: eLife. 2023 Jul 11;12:e83957. doi: 10.7554/eLife.83957 (PMC10335835; doi:10.7554/eLife.83957)
Supplement: Figure 3—source data 1. — For each test arena, data tabulate the arena, condition, <x,y> coordinates in pixels, lawn radius in pixels, the egg distance from arena center in pixels, the egg distance from lawn edge in pixels, position as 1 (off) or 0 (on) lawn, the conversion factor for pixel data in mm-per-pixel, the calculated distance from center in mm, the calculated distance from the lawn edge in mm. [file elife-83957-fig3-data1.xlsx]

## Sheet: Figure3B-C
Arena	Condition	X	Y	LawnRadius	DistCenterPx	DistEdgePx	off	PxScale	DistCenterMm	DistEdgeMm
00000001_2.tif	control	10.443	15.057	5.50017	4.95789	-0.542275	0	0.29777	1.47631	-0.161473
00000001_2.tif	control	10.271	14.964	5.50017	5.0211	-0.479071	0	0.29777	1.49513	-0.142653
00000001_2.tif	control	10.641	14.703	5.50017	4.57149	-0.928683	0	0.29777	1.36125	-0.276534
00000001_2.tif	control	9.521	12.734	5.50017	4.63464	-0.865529	0	0.29777	1.38006	-0.257729
00000001_2.tif	control	9.542	12.469	5.50017	4.55783	-0.942343	0	0.29777	1.35718	-0.280601
00000001_2.tif	control	9.911	12.479	5.50017	4.19779	-1.30238	0	0.29777	1.24998	-0.38781
00000001_2.tif	control	9.974	11.635	5.50017	4.04701	-1.45316	0	0.29777	1.20508	-0.432706
00000001_2.tif	control	9.932	11.323	5.50017	4.10014	-1.40003	0	0.29777	1.2209	-0.416887
00000001_2.tif	control	10.464	11.714	5.50017	3.55811	-1.94206	0	0.29777	1.0595	-0.578286
00000001_2.tif	control	11.005	11.271	5.50017	3.0367	-2.46346	0	0.29777	0.904239	-0.733546
00000001_2.tif	control	9.464	10.964	5.50017	4.60469	-0.895478	0	0.29777	1.37114	-0.266647
00000001_2.tif	control	9.516	10.859	5.50017	4.56966	-0.93051	0	0.29777	1.36071	-0.277078
00000001_2.tif	control	9.599	10.76	5.50017	4.50581	-0.99436	0	0.29777	1.34169	-0.296091
00000001_2.tif	control	9.328	10.776	5.50017	4.76918	-0.730991	0	0.29777	1.42012	-0.217667
00000001_2.tif	control	9.208	10.776	5.50017	4.88731	-0.612861	0	0.29777	1.45529	-0.182492
00000001_2.tif	control	9.297	9.917	5.50017	5.02329	-0.476879	0	0.29777	1.49578	-0.142
00000001_2.tif	control	9.021	9.698	5.50017	5.35848	-0.141687	0	0.29777	1.5956	-0.04219
00000001_2.tif	control	8.505	9.026	5.50017	6.09763	0.597459	1	0.29777	1.81569	0.177905
00000001_2.tif	control	8.495	8.849	5.50017	6.18408	0.683912	1	0.29777	1.84143	0.203648
00000001_2.tif	control	8.422	7.807	5.50017	6.77687	1.2767	1	0.29777	2.01795	0.380162
00000001_2.tif	control	8.422	7.594	5.50017	6.89911	1.39894	1	0.29777	2.05435	0.416564
00000001_2.tif	control	10.078	7.682	5.50017	5.57624	0.0760756	1	0.29777	1.66044	0.022653
00000001_2.tif	control	9.979	7.505	5.50017	5.77167	0.271501	1	0.29777	1.71863	0.0808447
00000001_2.tif	control	10.536	8.229	5.50017	4.86601	-0.63416	0	0.29777	1.44895	-0.188834
00000001_2.tif	control	10.646	7.953	5.50017	4.98741	-0.512763	0	0.29777	1.4851	-0.152686
00000001_2.tif	control	10.62	7.724	5.50017	5.17538	-0.324784	0	0.29777	1.54107	-0.096711
00000001_2.tif	control	10.896	8.448	5.50017	4.45634	-1.04383	0	0.29777	1.32696	-0.310821
00000001_2.tif	control	11.031	8.422	5.50017	4.3817	-1.11847	0	0.29777	1.30474	-0.333046
00000001_2.tif	control	11.083	7.943	5.50017	4.71052	-0.789652	0	0.29777	1.40265	-0.235135
00000001_2.tif	control	10.927	7.125	5.50017	5.46103	-0.0391396	0	0.29777	1.62613	-0.0116546
00000001_2.tif	control	8.885	4.693	5.50017	8.62735	3.12718	1	0.29777	2.56897	0.93118
00000001_2.tif	control	8.667	4.714	5.50017	8.74227	3.2421	1	0.29777	2.60318	0.9654
00000001_2.tif	control	12.411	2.293	5.50017	9.46986	3.9697	1	0.29777	2.81984	1.18206
00000001_2.tif	control	12.877	2.286	5.50017	9.40881	3.90864	1	0.29777	2.80166	1.16388
00000001_2.tif	control	13.356	3.668	5.50017	7.98474	2.48457	1	0.29777	2.37762	0.739831
00000001_2.tif	control	13.786	4.307	5.50017	7.32177	1.8216	1	0.29777	2.1802	0.542419
00000001_2.tif	control	11.589	6.802	5.50017	5.40148	-0.0986915	0	0.29777	1.6084	-0.0293874
00000001_2.tif	control	11.641	6.859	5.50017	5.32721	-0.172959	0	0.29777	1.58628	-0.0515021
00000001_2.tif	control	12.042	6.37	5.50017	5.61529	0.11512	1	0.29777	1.67206	0.0342793
00000001_2.tif	control	11.594	7.214	5.50017	5.03461	-0.465563	0	0.29777	1.49915	-0.138631
00000001_2.tif	control	11.724	7.365	5.50017	4.83981	-0.660354	0	0.29777	1.44115	-0.196633
00000001_2.tif	control	12.411	7.37	5.50017	4.54941	-0.950759	0	0.29777	1.35468	-0.283108
00000001_2.tif	control	12.062	7.792	5.50017	4.3046	-1.19557	0	0.29777	1.28178	-0.356005
00000001_2.tif	control	12.365	7.938	5.50017	4.04182	-1.45835	0	0.29777	1.20353	-0.434253
00000001_2.tif	control	13.318	7.401	5.50017	4.2821	-1.21807	0	0.29777	1.27508	-0.362704
00000001_2.tif	control	13.229	7.312	5.50017	4.38511	-1.11505	0	0.29777	1.30576	-0.332029
00000001_2.tif	control	13.453	6.734	5.50017	4.92387	-0.576298	0	0.29777	1.46618	-0.171604
00000001_2.tif	control	13.63	6.729	5.50017	4.91159	-0.58858	0	0.29777	1.46252	-0.175262
00000001_2.tif	control	13.646	6.849	5.50017	4.7907	-0.709469	0	0.29777	1.42653	-0.211259
00000001_2.tif	control	13.88	6.693	5.50017	4.93402	-0.566153	0	0.29777	1.4692	-0.168583
00000001_2.tif	control	13.922	6.547	5.50017	5.07896	-0.421204	0	0.29777	1.51236	-0.125422
00000001_2.tif	control	11.604	8.797	5.50017	3.72014	-1.78002	0	0.29777	1.10775	-0.530038
00000001_2.tif	control	11.719	8.76	5.50017	3.67525	-1.82492	0	0.29777	1.09438	-0.543407
00000001_2.tif	control	11.323	9.016	5.50017	3.75314	-1.74703	0	0.29777	1.11757	-0.520212
00000001_2.tif	control	11.323	9.141	5.50017	3.66735	-1.83282	0	0.29777	1.09203	-0.545758
00000001_2.tif	control	11.49	9.073	5.50017	3.59425	-1.90591	0	0.29777	1.07026	-0.567524
00000001_2.tif	control	11.609	9.422	5.50017	3.26664	-2.23353	0	0.29777	0.972708	-0.665077
00000001_2.tif	control	13.031	9.021	5.50017	2.78584	-2.71433	0	0.29777	0.82954	-0.808245
00000001_2.tif	control	13.453	9.01	5.50017	2.67598	-2.82419	0	0.29777	0.796825	-0.84096
00000001_2.tif	control	13.682	9.104	5.50017	2.54369	-2.95648	0	0.29777	0.757435	-0.88035
00000001_2.tif	control	13.198	9.401	5.50017	2.37139	-3.12878	0	0.29777	0.70613	-0.931655
00000001_2.tif	control	13.906	9.667	5.50017	1.96137	-3.53879	0	0.29777	0.584038	-1.05375
00000001_2.tif	control	13.766	9.812	5.50017	1.83085	-3.66932	0	0.29777	0.545171	-1.09261
00000001_2.tif	control	13.615	9.875	5.50017	1.79648	-3.70369	0	0.29777	0.534937	-1.10285
00000001_2.tif	control	13.776	10.245	5.50017	1.40158	-4.09859	0	0.29777	0.417348	-1.22044
00000001_2.tif	control	13.938	10.344	5.50017	1.28369	-4.21648	0	0.29777	0.382243	-1.25554
00000001_2.tif	control	13.526	10.208	5.50017	1.50097	-3.9992	0	0.29777	0.446944	-1.19084
00000001_2.tif	control	11.536	10.031	5.50017	2.9523	-2.54787	0	0.29777	0.879106	-0.75868
00000001_2.tif	control	12.557	10.505	5.50017	1.84328	-3.65688	0	0.29777	0.548875	-1.08891
00000001_2.tif	control	11.958	11.125	5.50017	2.12273	-3.37744	0	0.29777	0.632084	-1.0057
00000001_2.tif	control	12.651	11.333	5.50017	1.40077	-4.0994	0	0.29777	0.417108	-1.22068
00000001_2.tif	control	12.917	11.25	5.50017	1.16595	-4.33422	0	0.29777	0.347185	-1.2906
00000001_2.tif	control	13.911	10.781	5.50017	0.851138	-4.64903	0	0.29777	0.253443	-1.38434
00000001_2.tif	control	14.146	11.099	5.50017	0.540649	-4.95952	0	0.29777	0.160989	-1.4768
00000001_2.tif	control	12.109	11.583	5.50017	1.91246	-3.58771	0	0.29777	0.569474	-1.06831
00000001_2.tif	control	12.646	11.693	5.50017	1.37668	-4.12349	0	0.29777	0.409934	-1.22785
00000001_2.tif	control	13.073	11.51	5.50017	0.95495	-4.54522	0	0.29777	0.284355	-1.35343
00000001_2.tif	control	13.359	11.578	5.50017	0.663666	-4.8365	0	0.29777	0.19762	-1.44017
00000001_2.tif	control	13.438	11.49	5.50017	0.598426	-4.90174	0	0.29777	0.178193	-1.45959
00000001_2.tif	control	12.891	11.906	5.50017	1.16441	-4.33575	0	0.29777	0.346728	-1.29106
00000001_2.tif	control	12.943	11.974	5.50017	1.13309	-4.36708	0	0.29777	0.337399	-1.30039
00000001_2.tif	control	12.917	12.068	5.50017	1.18957	-4.3106	0	0.29777	0.354217	-1.28357
00000001_2.tif	control	12.922	12.167	5.50017	1.22538	-4.27478	0	0.29777	0.364882	-1.2729
00000001_2.tif	control	13.161	12.057	5.50017	0.962405	-4.53776	0	0.29777	0.286575	-1.35121
00000001_2.tif	control	13.266	12.177	5.50017	0.935269	-4.5649	0	0.29777	0.278495	-1.35929
00000001_2.tif	control	13.516	11.927	5.50017	0.588412	-4.91176	0	0.29777	0.175212	-1.46257
00000001_2.tif	control	13.781	11.958	5.50017	0.410474	-5.08969	0	0.29777	0.122227	-1.51556
00000001_2.tif	control	13.974	12.125	5.50017	0.502204	-4.99796	0	0.29777	0.149541	-1.48824
00000001_2.tif	control	12.958	12.609	5.50017	1.44853	-4.05164	0	0.29777	0.431327	-1.20646
00000001_2.tif	control	12.557	12.807	5.50017	1.8816	-3.61857	0	0.29777	0.560284	-1.0775
00000001_2.tif	control	12.339	12.812	5.50017	2.05866	-3.44151	0	0.29777	0.613008	-1.02478
00000001_2.tif	control	12.01	12.891	5.50017	2.37632	-3.12385	0	0.29777	0.707596	-0.93019
00000001_2.tif	control	12.609	13.057	5.50017	2.01106	-3.48911	0	0.29777	0.598834	-1.03895
00000001_2.tif	control	12.703	13.083	5.50017	1.96542	-3.53475	0	0.29777	0.585244	-1.05254
00000001_2.tif	control	13.286	13.12	5.50017	1.66591	-3.83426	0	0.29777	0.496057	-1.14173
00000001_2.tif	control	13.536	12.875	5.50017	1.34079	-4.15938	0	0.29777	0.399248	-1.23854
00000001_2.tif	control	13.599	12.87	5.50017	1.31458	-4.18559	0	0.29777	0.391441	-1.24634
00000001_2.tif	control	13.604	13.307	5.50017	1.73292	-3.76725	0	0.29777	0.516012	-1.12177
00000001_2.tif	control	13.766	13.266	5.50017	1.66069	-3.83947	0	0.29777	0.494505	-1.14328
00000001_2.tif	control	13.948	13.266	5.50017	1.64262	-3.85755	0	0.29777	0.489124	-1.14866
00000001_2.tif	control	13.927	13.516	5.50017	1.89333	-3.60683	0	0.29777	0.563778	-1.07401
00000001_2.tif	control	14.099	13.37	5.50017	1.74674	-3.75343	0	0.29777	0.520127	-1.11766
00000001_2.tif	control	12.307	13.474	5.50017	2.52123	-2.97894	0	0.29777	0.750746	-0.887039
00000001_2.tif	control	12.401	13.677	5.50017	2.6144	-2.88577	0	0.29777	0.778491	-0.859294
00000001_2.tif	control	11.88	13.901	5.50017	3.12475	-2.37542	0	0.29777	0.930457	-0.707329
00000001_2.tif	control	11.964	13.943	5.50017	3.09909	-2.40108	0	0.29777	0.922817	-0.714968
00000001_2.tif	control	13.24	13.807	5.50017	2.31756	-3.18261	0	0.29777	0.6901	-0.947685
00000001_2.tif	control	11.37	14.474	5.50017	3.89161	-1.60856	0	0.29777	1.1588	-0.478981
00000001_2.tif	control	11.646	14.448	5.50017	3.68917	-1.811	0	0.29777	1.09852	-0.539262
00000001_2.tif	control	11.391	14.995	5.50017	4.27479	-1.22538	0	0.29777	1.2729	-0.364882
00000001_2.tif	control	11.906	15.292	5.50017	4.23322	-1.26695	0	0.29777	1.26052	-0.377261
00000001_2.tif	control	11.917	15.427	5.50017	4.34534	-1.15482	0	0.29777	1.29391	-0.343872
00000001_2.tif	control	12.958	14.531	5.50017	3.09432	-2.40585	0	0.29777	0.921395	-0.71639
00000001_2.tif	control	13.521	14.51	5.50017	2.92801	-2.57216	0	0.29777	0.871873	-0.765913
00000001_2.tif	control	13.688	14.573	5.50017	2.96675	-2.53342	0	0.29777	0.883409	-0.754377
00000001_2.tif	control	13.656	14.745	5.50017	3.14128	-2.35889	0	0.29777	0.935378	-0.702407
00000001_2.tif	control	13.693	14.849	5.50017	3.24064	-2.25953	0	0.29777	0.964966	-0.672819
00000001_2.tif	control	13.505	15.172	5.50017	3.58434	-1.91583	0	0.29777	1.06731	-0.570477
00000001_2.tif	control	14.01	16.156	5.50017	4.53101	-0.969155	0	0.29777	1.3492	-0.288585
00000001_2.tif	control	12.99	16.385	5.50017	4.87038	-0.629793	0	0.29777	1.45025	-0.187533
00000001_2.tif	control	12.516	16.276	5.50017	4.88844	-0.61173	0	0.29777	1.45563	-0.182155
00000001_2.tif	control	12.589	16.203	5.50017	4.79674	-0.703429	0	0.29777	1.42833	-0.20946
00000001_2.tif	control	12.432	16.479	5.50017	5.10747	-0.3927	0	0.29777	1.52085	-0.116934
00000001_2.tif	control	12.62	16.443	5.50017	5.01756	-0.482607	0	0.29777	1.49408	-0.143706
00000001_2.tif	control	13.51	18.083	5.50017	6.47819	0.978017	1	0.29777	1.92901	0.291224
00000001_2.tif	control	14.844	17.026	5.50017	5.46334	-0.0368243	0	0.29777	1.62682	-0.0109652
00000001_2.tif	control	14.344	15.87	5.50017	4.25727	-1.2429	0	0.29777	1.26769	-0.370098
00000001_2.tif	control	14.354	16.208	5.50017	4.59508	-0.905087	0	0.29777	1.36828	-0.269508
00000001_2.tif	control	14.495	16.271	5.50017	4.67012	-0.830052	0	0.29777	1.39062	-0.247164
00000001_2.tif	control	14.932	16.182	5.50017	4.64717	-0.853001	0	0.29777	1.38379	-0.253998
00000001_2.tif	control	14.958	16.078	5.50017	4.55051	-0.949654	0	0.29777	1.35501	-0.282779
00000001_2.tif	control	15.417	16.234	5.50017	4.81578	-0.684393	0	0.29777	1.43399	-0.203792
00000001_2.tif	control	14.203	14.156	5.50017	2.53754	-2.96263	0	0.29777	0.755602	-0.882183
00000001_2.tif	control	15.448	13.932	5.50017	2.71267	-2.7875	0	0.29777	0.807752	-0.830033
00000001_2.tif	control	15.057	13.792	5.50017	2.40191	-3.09826	0	0.29777	0.715218	-0.922568
00000001_2.tif	control	14.969	13.333	5.50017	1.95345	-3.54672	0	0.29777	0.581679	-1.05611
00000001_2.tif	control	14.885	13.146	5.50017	1.74927	-3.7509	0	0.29777	0.520879	-1.11691
00000001_2.tif	control	14.693	13.135	5.50017	1.65278	-3.84739	0	0.29777	0.492149	-1.14564
00000001_2.tif	control	14.312	12.953	5.50017	1.35951	-4.14066	0	0.29777	0.404821	-1.23296
00000001_2.tif	control	14.349	12.833	5.50017	1.25174	-4.24843	0	0.29777	0.37273	-1.26506
00000001_2.tif	control	14.823	12.781	5.50017	1.40696	-4.09321	0	0.29777	0.418951	-1.21883
00000001_2.tif	control	15.333	12.276	5.50017	1.46463	-4.03554	0	0.29777	0.436123	-1.20166
00000001_2.tif	control	15.318	11.938	5.50017	1.33423	-4.16594	0	0.29777	0.397295	-1.24049
00000001_2.tif	control	14.995	11.734	5.50017	0.98008	-4.52009	0	0.29777	0.291838	-1.34595
00000001_2.tif	control	14.641	11.344	5.50017	0.680706	-4.81946	0	0.29777	0.202694	-1.43509
00000001_2.tif	control	15.047	10.469	5.50017	1.54564	-3.95453	0	0.29777	0.460246	-1.17754
00000001_2.tif	control	14.281	10.172	5.50017	1.47608	-4.02409	0	0.29777	0.439532	-1.19825
00000001_2.tif	control	14.38	10.161	5.50017	1.50737	-3.99279	0	0.29777	0.448851	-1.18893
00000001_2.tif	control	14.203	9.557	5.50017	2.07599	-3.42418	0	0.29777	0.618169	-1.01962
00000001_2.tif	control	14.198	9.401	5.50017	2.23103	-3.26914	0	0.29777	0.664334	-0.973451
00000001_2.tif	control	14.604	9.792	5.50017	1.92348	-3.57669	0	0.29777	0.572755	-1.06503
00000001_2.tif	control	14.74	9.25	5.50017	2.48145	-3.01872	0	0.29777	0.738901	-0.898884
00000001_2.tif	control	15.109	9.448	5.50017	2.43374	-3.06643	0	0.29777	0.724694	-0.913091
00000001_2.tif	control	14.771	8.948	5.50017	2.78008	-2.72009	0	0.29777	0.827824	-0.809962
00000001_2.tif	control	15.021	9.031	5.50017	2.78008	-2.72009	0	0.29777	0.827824	-0.809961
00000001_2.tif	control	15.161	8.906	5.50017	2.94831	-2.55185	0	0.29777	0.87792	-0.759865
00000001_2.tif	control	15.104	8.484	5.50017	3.32246	-2.1777	0	0.29777	0.98933	-0.648455
00000001_2.tif	control	15.12	8.312	5.50017	3.49053	-2.00964	0	0.29777	1.03937	-0.598411
00000001_2.tif	control	16.615	16.13	5.50017	5.19845	-0.301721	0	0.29777	1.54794	-0.0898433
00000001_2.tif	control	16.516	16.01	5.50017	5.04512	-0.455047	0	0.29777	1.50229	-0.135499
00000001_2.tif	control	16.964	15.51	5.50017	4.87386	-0.626312	0	0.29777	1.45129	-0.186497
00000001_2.tif	control	16.641	15.24	5.50017	4.4646	-1.03557	0	0.29777	1.32942	-0.308362
00000001_2.tif	control	15.745	13.693	5.50017	2.69236	-2.80781	0	0.29777	0.801704	-0.836081
00000001_2.tif	control	16.083	13.672	5.50017	2.90552	-2.59465	0	0.29777	0.865177	-0.772608
00000001_2.tif	control	16.047	13.87	5.50017	3.02402	-2.47615	0	0.29777	0.900463	-0.737323
00000001_2.tif	control	16.125	13.948	5.50017	3.13419	-2.36598	0	0.29777	0.933268	-0.704518
00000001_2.tif	control	16.177	14.016	5.50017	3.21951	-2.28066	0	0.29777	0.958672	-0.679113
00000001_2.tif	control	15.927	13.302	5.50017	2.53873	-2.96144	0	0.29777	0.755959	-0.881827
00000001_2.tif	control	16.516	13.161	5.50017	2.9299	-2.57027	0	0.29777	0.872437	-0.765348
00000001_2.tif	control	17.583	14.318	5.50017	4.46543	-1.03474	0	0.29777	1.32967	-0.308113
00000001_2.tif	control	17.646	13.74	5.50017	4.19689	-1.30328	0	0.29777	1.24971	-0.388078
00000001_2.tif	control	17.833	13.62	5.50017	4.30248	-1.19768	0	0.29777	1.28115	-0.356634
00000001_2.tif	control	17.932	13.557	5.50017	4.36217	-1.138	0	0.29777	1.29892	-0.338861
00000001_2.tif	control	18.542	12.667	5.50017	4.63953	-0.860642	0	0.29777	1.38151	-0.256273
00000001_2.tif	control	16.01	12.036	5.50017	2.03102	-3.46915	0	0.29777	0.604777	-1.03301
00000001_2.tif	control	16.052	11.943	5.50017	2.05574	-3.44442	0	0.29777	0.612139	-1.02565
00000001_2.tif	control	16.234	12.443	5.50017	2.35934	-3.14083	0	0.29777	0.702541	-0.935244
00000001_2.tif	control	16.536	12.073	5.50017	2.55459	-2.94558	0	0.29777	0.76068	-0.877105
00000001_2.tif	control	16.76	12.005	5.50017	2.76523	-2.73493	0	0.29777	0.823404	-0.814381
00000001_2.tif	control	16.797	11.943	5.50017	2.79415	-2.70601	0	0.29777	0.832015	-0.80577
00000001_2.tif	control	15.88	11.458	5.50017	1.86649	-3.63368	0	0.29777	0.555784	-1.082
00000001_2.tif	control	18.906	11.786	5.50017	4.88765	-0.612516	0	0.29777	1.4554	-0.182389
00000001_2.tif	control	16.01	10.438	5.50017	2.31627	-3.1839	0	0.29777	0.689715	-0.948071
00000001_2.tif	control	17.448	10.656	5.50017	3.56136	-1.93881	0	0.29777	1.06047	-0.577319
00000001_2.tif	control	16.661	9.641	5.50017	3.3024	-2.19777	0	0.29777	0.983356	-0.654429
00000001_2.tif	control	16.099	9.5	5.50017	2.97216	-2.52801	0	0.29777	0.885019	-0.752766
00000001_2.tif	control	16.141	9.016	5.50017	3.36174	-2.13843	0	0.29777	1.00102	-0.636761
00000001_2.tif	control	16.37	8.917	5.50017	3.58484	-1.91533	0	0.29777	1.06746	-0.570328
00000001_2.tif	control	16.604	9.115	5.50017	3.60166	-1.8985	0	0.29777	1.07247	-0.565317
00000001_2.tif	control	17.229	9.115	5.50017	4.07325	-1.42692	0	0.29777	1.21289	-0.424894
00000001_2.tif	control	17.302	8.901	5.50017	4.2644	-1.23577	0	0.29777	1.26981	-0.367974
00000001_2.tif	control	17.526	8.99	5.50017	4.385	-1.11517	0	0.29777	1.30572	-0.332063
00000001_2.tif	control	17.182	9.547	5.50017	3.78286	-1.71731	0	0.29777	1.12642	-0.511364
00000001_2.tif	control	17.328	9.51	5.50017	3.92549	-1.57468	0	0.29777	1.16889	-0.468892
00000001_2.tif	control	17.297	9.594	5.50017	3.8545	-1.64567	0	0.29777	1.14775	-0.490032
00000001_2.tif	control	17.422	9.604	5.50017	3.95617	-1.544	0	0.29777	1.17803	-0.459758
00000001_2.tif	control	18.26	9.151	5.50017	4.90814	-0.592033	0	0.29777	1.4615	-0.17629
00000001_2.tif	control	18.255	10.109	5.50017	4.49722	-1.00295	0	0.29777	1.33914	-0.298647
00000001_2.tif	control	18.349	10.167	5.50017	4.56698	-0.933184	0	0.29777	1.35991	-0.277874
00000001_2.tif	control	18.167	10.547	5.50017	4.28385	-1.21632	0	0.29777	1.2756	-0.362182
00000001_2.tif	control	18.422	10.417	5.50017	4.56378	-0.936391	0	0.29777	1.35896	-0.278829
00000001_2.tif	control	18.5	10.818	5.50017	4.55112	-0.949049	0	0.29777	1.35519	-0.282598
00000001_2.tif	control	19.104	10.99	5.50017	5.12251	-0.377658	0	0.29777	1.52533	-0.112455
00000001_2.tif	control	19.339	10.839	5.50017	5.37577	-0.124397	0	0.29777	1.60074	-0.0370417
00000001_2.tif	control	17.365	10.344	5.50017	3.58096	-1.91921	0	0.29777	1.0663	-0.571482
00000001_2.tif	control	16.839	8.396	5.50017	4.28574	-1.21443	0	0.29777	1.27616	-0.36162
00000001_2.tif	control	16.844	8.24	5.50017	4.40767	-1.0925	0	0.29777	1.31247	-0.325313
00000001_2.tif	control	16.677	8.135	5.50017	4.38571	-1.11446	0	0.29777	1.30593	-0.331853
00000001_2.tif	control	15.75	8.234	5.50017	3.80635	-1.69382	0	0.29777	1.13342	-0.504367
00000001_2.tif	control	15.521	7.74	5.50017	4.16452	-1.33565	0	0.29777	1.24007	-0.397716
00000001_2.tif	control	15.776	7.464	5.50017	4.51597	-0.984203	0	0.29777	1.34472	-0.293066
00000001_2.tif	control	17.531	8.349	5.50017	4.80128	-0.69889	0	0.29777	1.42968	-0.208108
00000001_2.tif	control	17.375	8.245	5.50017	4.76169	-0.738476	0	0.29777	1.41789	-0.219896
00000001_2.tif	control	14.302	7.234	5.50017	4.39998	-1.10019	0	0.29777	1.31018	-0.327603
00000001_2.tif	control	14.255	6.87	5.50017	4.76075	-0.739414	0	0.29777	1.41761	-0.220175
00000002_3.tif	control	10.738	16.238	5.69792	5.46802	-0.229905	0	0.29777	1.62821	-0.0684589
00000002_3.tif	control	11.314	15.783	5.69792	4.74334	-0.95458	0	0.29777	1.41243	-0.284245
00000002_3.tif	control	12.196	15.509	5.69792	3.97909	-1.71883	0	0.29777	1.18485	-0.511817
00000002_3.tif	control	10.083	14.818	5.69792	5.09111	-0.60681	0	0.29777	1.51598	-0.18069
00000002_3.tif	control	10.146	14.589	5.69792	4.924	-0.77392	0	0.29777	1.46622	-0.23045
00000002_3.tif	control	12.734	15.88	5.69792	4.02765	-1.67028	0	0.29777	1.19931	-0.497359
00000002_3.tif	control	12.589	16.953	5.69792	5.06856	-0.629363	0	0.29777	1.50927	-0.187405
00000002_3.tif	control	12.807	15.172	5.69792	3.36655	-2.33137	0	0.29777	1.00246	-0.694213
00000002_3.tif	control	13.161	15.344	5.69792	3.36303	-2.3349	0	0.29777	1.00141	-0.695262
00000002_3.tif	control	13.25	15.521	5.69792	3.49426	-2.20366	0	0.29777	1.04049	-0.656184
00000002_3.tif	control	13.12	14.849	5.69792	2.93286	-2.76506	0	0.29777	0.873318	-0.823352
00000002_3.tif	control	11.089	13.99	5.69792	3.81047	-1.88745	0	0.29777	1.13464	-0.562026
00000002_3.tif	control	9.635	12.719	5.69792	4.86665	-0.831272	0	0.29777	1.44914	-0.247528
00000002_3.tif	control	9.401	12.359	5.69792	5.07917	-0.618754	0	0.29777	1.51242	-0.184246
00000002_3.tif	control	10.099	12.057	5.69792	4.38425	-1.31367	0	0.29777	1.3055	-0.391173
00000002_3.tif	control	10.625	12.177	5.69792	3.85469	-1.84323	0	0.29777	1.14781	-0.548859
00000002_3.tif	control	11	12.297	5.69792	3.47932	-2.21861	0	0.29777	1.03604	-0.660634
00000002_3.tif	control	11.276	12.396	5.69792	3.20633	-2.4916	0	0.29777	0.954748	-0.741923
00000002_3.tif	control	11.203	12.812	5.69792	3.32386	-2.37407	0	0.29777	0.989745	-0.706926
00000002_3.tif	control	11.484	12.484	5.69792	3.00413	-2.6938	0	0.29777	0.894539	-0.802132
00000002_3.tif	control	11.344	13.229	5.69792	3.28431	-2.41362	0	0.29777	0.977968	-0.718703
00000002_3.tif	control	11.229	13.344	5.69792	3.42919	-2.26873	0	0.29777	1.02111	-0.675561
00000002_3.tif	control	11.25	13.422	5.69792	3.43512	-2.26281	0	0.29777	1.02287	-0.673796
00000002_3.tif	control	12.214	13.667	5.69792	2.67172	-3.0262	0	0.29777	0.79556	-0.901111
00000002_3.tif	control	12.198	13.323	5.69792	2.52077	-3.17715	0	0.29777	0.75061	-0.946061
00000002_3.tif	control	12.333	13.281	5.69792	2.38081	-3.31711	0	0.29777	0.708935	-0.987736
00000002_3.tif	control	12.969	13.844	5.69792	2.19566	-3.50226	0	0.29777	0.653803	-1.04287
00000002_3.tif	control	12.135	12.786	5.69792	2.4045	-3.29342	0	0.29777	0.715989	-0.980682
00000002_3.tif	control	12.667	12.88	5.69792	1.9184	-3.77953	0	0.29777	0.571241	-1.12543
00000002_3.tif	control	12.88	12.547	5.69792	1.62635	-4.07158	0	0.29777	0.484278	-1.21239
00000002_3.tif	control	11.125	11.583	5.69792	3.41968	-2.27824	0	0.29777	1.01828	-0.678393
00000002_3.tif	control	9.625	11.146	5.69792	4.97796	-0.719959	0	0.29777	1.48229	-0.214382
00000002_3.tif	control	9.495	10.76	5.69792	5.20196	-0.495967	0	0.29777	1.54899	-0.147684
00000002_3.tif	control	10.214	10.719	5.69792	4.53147	-1.16646	0	0.29777	1.34933	-0.347336
00000002_3.tif	control	10.047	10.297	5.69792	4.84323	-0.854698	0	0.29777	1.44217	-0.254504
00000002_3.tif	control	10.276	10.266	5.69792	4.64774	-1.05019	0	0.29777	1.38396	-0.312714
00000002_3.tif	control	11.755	10.667	5.69792	3.15057	-2.54736	0	0.29777	0.938144	-0.758527
00000002_3.tif	control	12.958	11.172	5.69792	1.86428	-3.83365	0	0.29777	0.555125	-1.14155
00000002_3.tif	control	13.24	11.156	5.69792	1.65286	-4.04506	0	0.29777	0.492173	-1.2045
00000002_3.tif	control	11.177	9.672	5.69792	4.18919	-1.50874	0	0.29777	1.24741	-0.449257
00000002_3.tif	control	10.516	9.188	5.69792	5.00811	-0.689809	0	0.29777	1.49127	-0.205404
00000002_3.tif	control	10.719	8.948	5.69792	5.00408	-0.693845	0	0.29777	1.49006	-0.206606
00000002_3.tif	control	10.792	8.76	5.69792	5.07682	-0.621107	0	0.29777	1.51172	-0.184947
00000002_3.tif	control	10.917	8.542	5.69792	5.1417	-0.556221	0	0.29777	1.53104	-0.165626
00000002_3.tif	control	11.193	8.635	5.69792	4.88529	-0.812638	0	0.29777	1.45469	-0.241979
00000002_3.tif	control	11.052	8.724	5.69792	4.91701	-0.780912	0	0.29777	1.46414	-0.232532
00000002_3.tif	control	11.276	8.547	5.69792	4.89606	-0.801862	0	0.29777	1.4579	-0.238771
00000002_3.tif	control	11.135	8.276	5.69792	5.19375	-0.504176	0	0.29777	1.54654	-0.150129
00000002_3.tif	control	11.214	8.198	5.69792	5.20374	-0.494182	0	0.29777	1.54952	-0.147153
00000002_3.tif	control	11.469	8.531	5.69792	4.78446	-0.913463	0	0.29777	1.42467	-0.272002
00000002_3.tif	control	12.932	8.839	5.69792	3.74541	-1.95251	0	0.29777	1.11527	-0.581399
00000002_3.tif	control	12.948	8.302	5.69792	4.23446	-1.46346	0	0.29777	1.2609	-0.435775
00000002_3.tif	control	13.005	8.391	5.69792	4.13093	-1.567	0	0.29777	1.23007	-0.466605
00000002_3.tif	control	13.177	7.948	5.69792	4.49471	-1.20321	0	0.29777	1.33839	-0.358281
00000002_3.tif	control	12.385	7.979	5.69792	4.75671	-0.941215	0	0.29777	1.41641	-0.280266
00000002_3.tif	control	13.818	7.87	5.69792	4.4296	-1.26833	0	0.29777	1.319	-0.37767
00000002_3.tif	control	13.755	7.964	5.69792	4.34672	-1.3512	0	0.29777	1.29432	-0.402348
00000002_3.tif	control	13.719	7.901	5.69792	4.41491	-1.28302	0	0.29777	1.31463	-0.382044
00000002_3.tif	control	13.703	8.094	5.69792	4.22783	-1.4701	0	0.29777	1.25892	-0.437751
00000002_3.tif	control	13.849	8.188	5.69792	4.11056	-1.58736	0	0.29777	1.224	-0.472668
00000002_3.tif	control	15.01	7.047	5.69792	5.23003	-0.467898	0	0.29777	1.55734	-0.139326
00000002_3.tif	control	15.172	7.036	5.69792	5.25985	-0.438072	0	0.29777	1.56623	-0.130445
00000002_3.tif	control	15.24	6.938	5.69792	5.36623	-0.33169	0	0.29777	1.5979	-0.0987673
00000002_3.tif	control	15.422	6.979	5.69792	5.35469	-0.343235	0	0.29777	1.59447	-0.102205
00000002_3.tif	control	15.516	7.01	5.69792	5.34163	-0.356298	0	0.29777	1.59058	-0.106095
00000002_3.tif	control	15.661	6.911	5.69792	5.46828	-0.229648	0	0.29777	1.62829	-0.0683821
00000002_3.tif	control	15.896	8.406	5.69792	4.09686	-1.60107	0	0.29777	1.21992	-0.47675
00000002_3.tif	control	15.266	9.693	5.69792	2.67537	-3.02255	0	0.29777	0.796646	-0.900025
00000002_3.tif	control	15.552	9.557	5.69792	2.89889	-2.79903	0	0.29777	0.863203	-0.833468
00000002_3.tif	control	13.745	10.901	5.69792	1.53576	-4.16216	0	0.29777	0.457303	-1.23937
00000002_3.tif	control	13.438	11.406	5.69792	1.34016	-4.35777	0	0.29777	0.399058	-1.29761
00000002_3.tif	control	13.573	11.547	5.69792	1.14675	-4.55117	0	0.29777	0.341469	-1.3552
00000002_3.tif	control	13.698	11.62	5.69792	1.00342	-4.6945	0	0.29777	0.29879	-1.39788
00000002_3.tif	control	16.167	9.786	5.69792	2.98674	-2.71118	0	0.29777	0.889363	-0.807308
00000002_3.tif	control	16.365	9.656	5.69792	3.20715	-2.49077	0	0.29777	0.954994	-0.741677
00000002_3.tif	control	16.438	9.625	5.69792	3.27541	-2.42251	0	0.29777	0.975319	-0.721352
00000002_3.tif	control	17.151	9.224	5.69792	4.03686	-1.66106	0	0.29777	1.20206	-0.494614
00000002_3.tif	control	17.151	9.104	5.69792	4.12758	-1.57035	0	0.29777	1.22907	-0.467602
00000002_3.tif	control	13.51	12.276	5.69792	0.969349	-4.72858	0	0.29777	0.288643	-1.40803
00000002_3.tif	control	14.578	11.792	5.69792	0.468578	-5.22935	0	0.29777	0.139528	-1.55714
00000002_3.tif	control	14.74	11.766	5.69792	0.549888	-5.14804	0	0.29777	0.16374	-1.53293
00000002_3.tif	control	14.922	11.75	5.69792	0.668019	-5.02991	0	0.29777	0.198916	-1.49775
00000002_3.tif	control	15.271	11.411	5.69792	1.15377	-4.54415	0	0.29777	0.343558	-1.35311
00000002_3.tif	control	15.901	11.109	5.69792	1.82317	-3.87475	0	0.29777	0.542887	-1.15378
00000002_3.tif	control	16.203	11.083	5.69792	2.08184	-3.61608	0	0.29777	0.61991	-1.07676
00000002_3.tif	control	17.516	10.411	5.69792	3.55039	-2.14753	0	0.29777	1.0572	-0.63947
00000002_3.tif	control	16.979	10.865	5.69792	2.85801	-2.83991	0	0.29777	0.85103	-0.845641
00000002_3.tif	control	17.109	11.089	5.69792	2.87486	-2.82306	0	0.29777	0.856047	-0.840624
00000002_3.tif	control	17.13	11.177	5.69792	2.85992	-2.83801	0	0.29777	0.851598	-0.845073
00000002_3.tif	control	13.339	13.005	5.69792	1.36734	-4.33058	0	0.29777	0.407154	-1.28952
00000002_3.tif	control	13.391	12.953	5.69792	1.29536	-4.40257	0	0.29777	0.385719	-1.31095
00000002_3.tif	control	13.745	13.203	5.69792	1.2029	-4.49503	0	0.29777	0.358187	-1.33848
00000002_3.tif	control	13.995	13.021	5.69792	0.910328	-4.7876	0	0.29777	0.271068	-1.4256
00000002_3.tif	control	13.901	12.906	5.69792	0.874311	-4.82361	0	0.29777	0.260344	-1.43633
00000002_3.tif	control	13.995	12.792	5.69792	0.72665	-4.97127	0	0.29777	0.216375	-1.4803
00000002_3.tif	control	14.177	12.609	5.69792	0.469132	-5.22879	0	0.29777	0.139693	-1.55698
00000002_3.tif	control	14.333	12.906	5.69792	0.672051	-5.02587	0	0.29777	0.200117	-1.49655
00000002_3.tif	control	14.521	12.693	5.69792	0.444987	-5.25294	0	0.29777	0.132504	-1.56417
00000002_3.tif	control	14.557	12.234	5.69792	0.0796241	-5.6183	0	0.29777	0.0237097	-1.67296
00000002_3.tif	control	15.01	12.438	5.69792	0.563298	-5.13463	0	0.29777	0.167733	-1.52894
00000002_3.tif	control	14.979	12.839	5.69792	0.772607	-4.92532	0	0.29777	0.230059	-1.46661
00000002_3.tif	control	15.432	12.188	5.69792	0.955015	-4.74291	0	0.29777	0.284375	-1.4123
00000002_3.tif	control	15.349	12.078	5.69792	0.886839	-4.81108	0	0.29777	0.264074	-1.4326
00000002_3.tif	control	15.641	12.396	5.69792	1.17114	-4.52679	0	0.29777	0.348729	-1.34794
00000002_3.tif	control	15.812	12.406	5.69792	1.3421	-4.35583	0	0.29777	0.399636	-1.29703
00000002_3.tif	control	15.724	12.266	5.69792	1.2451	-4.45282	0	0.29777	0.370754	-1.32592
00000002_3.tif	control	17.469	11.938	5.69792	3.00623	-2.69169	0	0.29777	0.895166	-0.801504
00000002_3.tif	control	17.49	11.677	5.69792	3.06504	-2.63289	0	0.29777	0.912676	-0.783995
00000002_3.tif	control	17.49	11.573	5.69792	3.08617	-2.61175	0	0.29777	0.918969	-0.777702
00000002_3.tif	control	17.797	11.781	5.69792	3.35098	-2.34694	0	0.29777	0.997822	-0.698849
00000002_3.tif	control	15.74	12.589	5.69792	1.30577	-4.39215	0	0.29777	0.38882	-1.30785
00000002_3.tif	control	13.641	13.724	5.69792	1.69556	-4.00236	0	0.29777	0.504887	-1.19178
00000002_3.tif	control	13.932	13.516	5.69792	1.37912	-4.31881	0	0.29777	0.41066	-1.28601
00000002_3.tif	control	13.927	13.443	5.69792	1.31452	-4.38341	0	0.29777	0.391424	-1.30525
00000002_3.tif	control	14.01	13.474	5.69792	1.31078	-4.38715	0	0.29777	0.39031	-1.30636
00000002_3.tif	control	14.562	13.49	5.69792	1.24277	-4.45515	0	0.29777	0.370061	-1.32661
00000002_3.tif	control	14.13	13.276	5.69792	1.08373	-4.61419	0	0.29777	0.322703	-1.37397
00000002_3.tif	control	14.141	13.167	5.69792	0.977309	-4.72061	0	0.29777	0.291013	-1.40566
00000002_3.tif	control	14.266	13.104	5.69792	0.880162	-4.81776	0	0.29777	0.262086	-1.43458
00000002_3.tif	control	13.745	13.953	5.69792	1.85444	-3.84348	0	0.29777	0.552198	-1.14447
00000002_3.tif	control	13.844	13.917	5.69792	1.78385	-3.91408	0	0.29777	0.531176	-1.16549
00000002_3.tif	control	13.885	13.797	5.69792	1.65712	-4.0408	0	0.29777	0.49344	-1.20323
00000002_3.tif	control	13.974	13.771	5.69792	1.60264	-4.09528	0	0.29777	0.477219	-1.21945
00000002_3.tif	control	13.927	13.615	5.69792	1.47239	-4.22553	0	0.29777	0.438433	-1.25824
00000002_3.tif	control	14.089	13.771	5.69792	1.5702	-4.12772	0	0.29777	0.46756	-1.22911
00000002_3.tif	control	13.844	14.188	5.69792	2.03938	-3.65854	0	0.29777	0.607266	-1.0894
00000002_3.tif	control	13.682	14.589	5.69792	2.47106	-3.22687	0	0.29777	0.735807	-0.960864
00000002_3.tif	control	13.312	15.099	5.69792	3.07875	-2.61918	0	0.29777	0.916759	-0.779912
00000002_3.tif	control	14.026	14.75	5.69792	2.54071	-3.15721	0	0.29777	0.756547	-0.940123
00000002_3.tif	control	14.578	13.781	5.69792	1.5342	-4.16373	0	0.29777	0.456838	-1.23983
00000002_3.tif	control	14.656	13.635	5.69792	1.39626	-4.30166	0	0.29777	0.415766	-1.28091
00000002_3.tif	control	14.849	13.76	5.69792	1.55467	-4.14325	0	0.29777	0.462934	-1.23374
00000002_3.tif	control	14.964	13.74	5.69792	1.56695	-4.13098	0	0.29777	0.46659	-1.23008
00000002_3.tif	control	14.885	13.354	5.69792	1.17629	-4.52164	0	0.29777	0.350263	-1.34641
00000002_3.tif	control	14.896	13.099	5.69792	0.945881	-4.75204	0	0.29777	0.281655	-1.41502
00000002_3.tif	control	15.073	13.401	5.69792	1.29524	-4.40269	0	0.29777	0.385683	-1.31099
00000002_3.tif	control	15.161	13.448	5.69792	1.37852	-4.3194	0	0.29777	0.410483	-1.28619
00000002_3.tif	control	15.25	13.245	5.69792	1.25876	-4.43917	0	0.29777	0.37482	-1.32185
00000002_3.tif	control	15.302	13.068	5.69792	1.16037	-4.53756	0	0.29777	0.345523	-1.35115
00000002_3.tif	control	15.484	13.589	5.69792	1.6742	-4.02372	0	0.29777	0.498527	-1.19814
00000002_3.tif	control	15.594	13.552	5.69792	1.71418	-3.98374	0	0.29777	0.510433	-1.18624
00000002_3.tif	control	15.724	13.552	5.69792	1.80145	-3.89647	0	0.29777	0.536418	-1.16025
00000002_3.tif	control	15.839	13.589	5.69792	1.90854	-3.78938	0	0.29777	0.568306	-1.12837
00000002_3.tif	control	15.552	13.214	5.69792	1.44244	-4.25549	0	0.29777	0.429515	-1.26716
00000002_3.tif	control	15.578	13.172	5.69792	1.43453	-4.26339	0	0.29777	0.427161	-1.26951
00000002_3.tif	control	15.849	13.099	5.69792	1.61174	-4.08619	0	0.29777	0.479927	-1.21674
00000002_3.tif	control	16.01	12.859	5.69792	1.64768	-4.05025	0	0.29777	0.490629	-1.20604
00000002_3.tif	control	16.026	12.953	5.69792	1.69924	-3.99868	0	0.29777	0.505983	-1.19069
00000002_3.tif	control	16.156	12.677	5.69792	1.73051	-3.96742	0	0.29777	0.515293	-1.18138
00000002_3.tif	control	16.167	13.12	5.69792	1.89901	-3.79891	0	0.29777	0.565469	-1.1312
00000002_3.tif	control	16.661	13.135	5.69792	2.35464	-3.34328	0	0.29777	0.701142	-0.995528
00000002_3.tif	control	17.484	12.542	5.69792	3.01915	-2.67877	0	0.29777	0.899013	-0.797657
00000002_3.tif	control	17.672	12.74	5.69792	3.23038	-2.46754	0	0.29777	0.96191	-0.734761
00000002_3.tif	control	17.771	12.49	5.69792	3.30074	-2.39719	0	0.29777	0.98286	-0.71381
00000002_3.tif	control	17.266	13.344	5.69792	2.99403	-2.7039	0	0.29777	0.891532	-0.805139
00000002_3.tif	control	17.406	13.385	5.69792	3.13936	-2.55857	0	0.29777	0.934806	-0.761865
00000002_3.tif	control	15.536	13.911	5.69792	1.9688	-3.72912	0	0.29777	0.586249	-1.11042
00000002_3.tif	control	15.12	14.052	5.69792	1.91261	-3.78531	0	0.29777	0.569519	-1.12715
00000002_3.tif	control	15.401	14.286	5.69792	2.23503	-3.46289	0	0.29777	0.665526	-1.03114
00000002_3.tif	control	15.76	14.229	5.69792	2.35741	-3.34051	0	0.29777	0.701967	-0.994704
00000002_3.tif	control	15.896	14.365	5.69792	2.5458	-3.15212	0	0.29777	0.758064	-0.938607
00000002_3.tif	control	16.219	14.422	5.69792	2.78302	-2.91491	0	0.29777	0.828699	-0.867972
00000002_3.tif	control	16.286	14.484	5.69792	2.87333	-2.8246	0	0.29777	0.85559	-0.84108
00000002_3.tif	control	16.271	14.625	5.69792	2.97521	-2.72271	0	0.29777	0.885929	-0.810742
00000002_3.tif	control	16.76	13.958	5.69792	2.8496	-2.84832	0	0.29777	0.848526	-0.848145
00000002_3.tif	control	15.865	14.891	5.69792	2.9826	-2.71533	0	0.29777	0.888128	-0.808543
00000002_3.tif	control	15.698	15.062	5.69792	3.06485	-2.63307	0	0.29777	0.91262	-0.78405
00000002_3.tif	control	15.443	15.167	5.69792	3.07216	-2.62576	0	0.29777	0.914798	-0.781873
00000002_3.tif	control	13.995	15.625	5.69792	3.40953	-2.2884	0	0.29777	1.01526	-0.681416
00000002_3.tif	control	13.516	16.177	5.69792	4.04335	-1.65457	0	0.29777	1.20399	-0.492682
00000002_3.tif	control	13.745	16.354	5.69792	4.16912	-1.5288	0	0.29777	1.24144	-0.455232
00000002_3.tif	control	13.833	16.354	5.69792	4.15453	-1.54339	0	0.29777	1.23709	-0.459576
00000002_3.tif	control	14.417	16.307	5.69792	4.05747	-1.64045	0	0.29777	1.20819	-0.488477
00000002_3.tif	control	14.333	16.141	5.69792	3.89374	-1.80419	0	0.29777	1.15944	-0.537232
00000002_3.tif	control	14.51	16.193	5.69792	3.94312	-1.7548	0	0.29777	1.17414	-0.522527
00000002_3.tif	control	14.474	17.167	5.69792	4.917	-0.780921	0	0.29777	1.46414	-0.232535
00000002_3.tif	control	14.776	15.974	5.69792	3.73582	-1.9621	0	0.29777	1.11242	-0.584254
00000002_3.tif	control	15.172	16.839	5.69792	4.64103	-1.05689	0	0.29777	1.38196	-0.314711
00000002_3.tif	control	15.307	16.38	5.69792	4.21218	-1.48574	0	0.29777	1.25426	-0.442409
00000002_3.tif	control	15.635	15.844	5.69792	3.77534	-1.92259	0	0.29777	1.12418	-0.572489
00000002_3.tif	control	15.885	15.349	5.69792	3.40303	-2.29489	0	0.29777	1.01332	-0.683349
00000002_3.tif	control	16.219	15.13	5.69792	3.36482	-2.33311	0	0.29777	1.00194	-0.694729
00000002_3.tif	control	16.276	15.047	5.69792	3.32452	-2.37341	0	0.29777	0.989942	-0.706729
00000002_3.tif	control	16.328	15.229	5.69792	3.50617	-2.19175	0	0.29777	1.04403	-0.652638
00000002_3.tif	control	16.328	15.312	5.69792	3.57696	-2.12096	0	0.29777	1.06511	-0.631559
00000002_3.tif	control	16.453	15.292	5.69792	3.62635	-2.07157	0	0.29777	1.07982	-0.616851
00000002_3.tif	control	16.562	15.302	5.69792	3.69508	-2.00285	0	0.29777	1.10028	-0.596388
00000002_3.tif	control	15.979	16.349	5.69792	4.36484	-1.33309	0	0.29777	1.29972	-0.396953
00000002_3.tif	control	16.208	16.594	5.69792	4.67544	-1.02248	0	0.29777	1.39221	-0.304464
00000002_3.tif	control	17.344	17.24	5.69792	5.75398	0.0560596	1	0.29777	1.71336	0.0166929
00000002_3.tif	control	16.792	15.542	5.69792	4.02334	-1.67459	0	0.29777	1.19803	-0.498642
00000002_3.tif	control	16.828	15.682	5.69792	4.1589	-1.53903	0	0.29777	1.23839	-0.458276
00000002_3.tif	control	17.094	15.432	5.69792	4.11866	-1.57927	0	0.29777	1.22641	-0.470258
00000002_3.tif	control	17.224	15.37	5.69792	4.15565	-1.54227	0	0.29777	1.23743	-0.459243
00000002_3.tif	control	17.417	15.156	5.69792	4.13239	-1.56553	0	0.29777	1.2305	-0.466168
00000002_3.tif	control	17.26	15.984	5.69792	4.65583	-1.0421	0	0.29777	1.38637	-0.310305
00000002_3.tif	control	17.438	16.172	5.69792	4.91302	-0.784904	0	0.29777	1.46295	-0.233721
00000002_3.tif	control	17.568	16.068	5.69792	4.91111	-0.786809	0	0.29777	1.46238	-0.234288
00000002_3.tif	control	17.828	15.891	5.69792	4.94699	-0.750937	0	0.29777	1.47306	-0.223606
00000002_3.tif	control	17.943	15.833	5.69792	4.98369	-0.714232	0	0.29777	1.48399	-0.212677
00000002_3.tif	control	18.026	15.839	5.69792	5.046	-0.651922	0	0.29777	1.50255	-0.194123
00000002_3.tif	control	17.802	15.755	5.69792	4.82984	-0.868084	0	0.29777	1.43818	-0.258489
00000002_3.tif	control	18.01	15.74	5.69792	4.96468	-0.733242	0	0.29777	1.47833	-0.218338
00000002_3.tif	control	18.708	15.589	5.69792	5.38826	-0.309662	0	0.29777	1.60446	-0.0922081
00000002_3.tif	control	18.948	15.661	5.69792	5.622	-0.0759239	0	0.29777	1.67406	-0.0226079
00000002_3.tif	control	19.51	15.51	5.69792	5.99488	0.296954	1	0.29777	1.78509	0.088424
00000002_3.tif	control	18.146	14.016	5.69792	4.07009	-1.62783	0	0.29777	1.21195	-0.48472
00000002_3.tif	control	18.349	14.302	5.69792	4.38037	-1.31756	0	0.29777	1.30434	-0.392329
00000002_3.tif	control	19.031	14.245	5.69792	4.96998	-0.727941	0	0.29777	1.47991	-0.216759
00000002_3.tif	control	18.854	13.958	5.69792	4.69658	-1.00134	0	0.29777	1.3985	-0.298169
00000002_3.tif	control	18.365	13.391	5.69792	4.05005	-1.64788	0	0.29777	1.20598	-0.490688
00000002_3.tif	control	19.37	13.443	5.69792	5.03439	-0.663529	0	0.29777	1.49909	-0.197579
00000002_3.tif	control	19.885	13.38	5.69792	5.52284	-0.175086	0	0.29777	1.64454	-0.0521354
00000002_3.tif	control	19.323	12.547	5.69792	4.8531	-0.844827	0	0.29777	1.44511	-0.251564
00000002_3.tif	control	19.182	12.448	5.69792	4.70717	-0.990758	0	0.29777	1.40165	-0.295018
00000002_3.tif	control	19.422	11.734	5.69792	4.96986	-0.728064	0	0.29777	1.47988	-0.216796
00000002_3.tif	control	18.953	11.573	5.69792	4.52493	-1.17299	0	0.29777	1.34739	-0.349282
00000002_3.tif	control	18.818	11.432	5.69792	4.41543	-1.28249	0	0.29777	1.31478	-0.381887
00000002_3.tif	control	18.766	11.224	5.69792	4.40807	-1.28986	0	0.29777	1.31259	-0.384081
00000002_3.tif	control	18.948	11.219	5.69792	4.58638	-1.11154	0	0.29777	1.36569	-0.330983
00000002_3.tif	control	18.422	9.651	5.69792	4.7225	-0.975419	0	0.29777	1.40622	-0.290451
00000002_7.tif	smeared	5.844	10.891	5.66664	8.7621	3.09547	1	0.29777	2.60909	0.921737
00000002_7.tif	smeared	7.792	14.646	5.66664	7.68754	2.0209	1	0.29777	2.28912	0.601765
00000002_7.tif	smeared	10.333	14.484	5.66664	5.45969	-0.206945	0	0.29777	1.62573	-0.0616221
00000002_7.tif	smeared	8.302	12.875	5.66664	6.55183	0.885192	1	0.29777	1.95094	0.263584
00000002_7.tif	smeared	8.307	12.667	5.66664	6.49317	0.826533	1	0.29777	1.93347	0.246117
00000002_7.tif	smeared	8.177	12.094	5.66664	6.50603	0.839394	1	0.29777	1.9373	0.249946
00000002_7.tif	smeared	8.151	11.948	5.66664	6.51072	0.844079	1	0.29777	1.9387	0.251341
00000002_7.tif	smeared	8.812	11.979	5.66664	5.86089	0.194256	1	0.29777	1.7452	0.0578437
00000002_7.tif	smeared	8.917	12.073	5.66664	5.77253	0.105889	1	0.29777	1.71889	0.0315307
00000002_7.tif	smeared	9.125	12.422	5.66664	5.64024	-0.0263929	0	0.29777	1.6795	-0.007859
00000002_7.tif	smeared	9.141	12.646	5.66664	5.68219	0.0155571	1	0.29777	1.69199	0.00463244
00000002_7.tif	smeared	9.302	12.714	5.66664	5.54719	-0.119443	0	0.29777	1.65179	-0.0355667
00000002_7.tif	smeared	9.276	12.974	5.66664	5.65362	-0.0130137	0	0.29777	1.68348	-0.00387508
00000002_7.tif	smeared	9.438	12.964	5.66664	5.49779	-0.168846	0	0.29777	1.63708	-0.0502772
00000002_7.tif	smeared	9.984	12.583	5.66664	4.85741	-0.809231	0	0.29777	1.44639	-0.240965
00000002_7.tif	smeared	8.568	11.729	5.66664	6.07047	0.403833	1	0.29777	1.8076	0.120249
00000002_7.tif	smeared	8.891	11.802	5.66664	5.75807	0.0914288	1	0.29777	1.71458	0.0272248
00000002_7.tif	smeared	9.167	11.656	5.66664	5.46711	-0.199527	0	0.29777	1.62794	-0.0594132
00000002_7.tif	smeared	9.349	11.161	5.66664	5.25558	-0.411059	0	0.29777	1.56495	-0.122401
00000002_7.tif	smeared	9.641	10.74	5.66664	4.97484	-0.691799	0	0.29777	1.48136	-0.205997
00000002_7.tif	smeared	9.812	10.667	5.66664	4.81002	-0.856615	0	0.29777	1.43228	-0.255074
00000002_7.tif	smeared	9.776	10.583	5.66664	4.85382	-0.812816	0	0.29777	1.44532	-0.242032
00000002_7.tif	smeared	8.312	10.286	5.66664	6.34228	0.675639	1	0.29777	1.88854	0.201185
00000002_7.tif	smeared	10.193	9.047	5.66664	4.85821	-0.808426	0	0.29777	1.44663	-0.240725
00000002_7.tif	smeared	10.073	8.922	5.66664	5.01995	-0.646689	0	0.29777	1.49479	-0.192565
00000002_7.tif	smeared	10.078	8.766	5.66664	5.0846	-0.582037	0	0.29777	1.51404	-0.173313
00000002_7.tif	smeared	10.229	8.833	5.66664	4.91967	-0.746971	0	0.29777	1.46493	-0.222425
00000002_7.tif	smeared	9.958	8.344	5.66664	5.39328	-0.273361	0	0.29777	1.60596	-0.0813986
00000002_7.tif	smeared	8.328	7.411	5.66664	7.2713	1.60466	1	0.29777	2.16517	0.477819
00000002_7.tif	smeared	9.76	7.042	5.66664	6.30825	0.641612	1	0.29777	1.87841	0.191053
00000002_7.tif	smeared	9.859	6.969	5.66664	6.28013	0.613491	1	0.29777	1.87003	0.182679
00000002_7.tif	smeared	13.443	4.417	5.66664	6.76635	1.09971	1	0.29777	2.01482	0.327461
00000002_7.tif	smeared	13.026	7.724	5.66664	3.71119	-1.95544	0	0.29777	1.10508	-0.582272
00000002_7.tif	smeared	13.031	7.802	5.66664	3.63858	-2.02805	0	0.29777	1.08346	-0.603894
00000002_7.tif	smeared	13.068	7.958	5.66664	3.48209	-2.18455	0	0.29777	1.03686	-0.650494
00000002_7.tif	smeared	13.411	7.505	5.66664	3.77165	-1.89499	0	0.29777	1.12308	-0.564271
00000002_7.tif	smeared	11.396	8.375	5.66664	4.19816	-1.46848	0	0.29777	1.25009	-0.437269
00000002_7.tif	smeared	11.344	8.854	5.66664	3.94918	-1.71746	0	0.29777	1.17595	-0.511407
00000002_7.tif	smeared	11.557	9.099	5.66664	3.636	-2.03064	0	0.29777	1.08269	-0.604664
00000002_7.tif	smeared	11.672	8.818	5.66664	3.70498	-1.96166	0	0.29777	1.10323	-0.584124
00000002_7.tif	smeared	11.792	8.833	5.66664	3.60137	-2.06527	0	0.29777	1.07238	-0.614976
00000002_7.tif	smeared	10.49	9.484	5.66664	4.41382	-1.25282	0	0.29777	1.3143	-0.373052
00000002_7.tif	smeared	11.042	9.698	5.66664	3.82179	-1.84485	0	0.29777	1.13801	-0.549341
00000002_7.tif	smeared	12.214	9.109	5.66664	3.0998	-2.56684	0	0.29777	0.923028	-0.764327
00000002_7.tif	smeared	12.323	8.984	5.66664	3.0998	-2.56684	0	0.29777	0.923028	-0.764327
00000002_7.tif	smeared	12.484	9.286	5.66664	2.77914	-2.8875	0	0.29777	0.827544	-0.859811
00000002_7.tif	smeared	13.37	8.901	5.66664	2.50677	-3.15987	0	0.29777	0.74644	-0.940915
00000002_7.tif	smeared	12.312	9.594	5.66664	2.7332	-2.93344	0	0.29777	0.813865	-0.87349
00000002_7.tif	smeared	12.396	9.854	5.66664	2.527	-3.13964	0	0.29777	0.752463	-0.934891
00000002_7.tif	smeared	12.344	9.917	5.66664	2.54306	-3.12358	0	0.29777	0.757247	-0.930108
00000002_7.tif	smeared	12.271	10.01	5.66664	2.56792	-3.09872	0	0.29777	0.76465	-0.922705
00000002_7.tif	smeared	11.411	10.411	5.66664	3.26295	-2.40369	0	0.29777	0.971608	-0.715747
00000002_7.tif	smeared	11.51	10.406	5.66664	3.1672	-2.49944	0	0.29777	0.943098	-0.744257
00000002_7.tif	smeared	11.453	10.609	5.66664	3.18645	-2.48019	0	0.29777	0.94883	-0.738525
00000002_7.tif	smeared	11.422	11.224	5.66664	3.18512	-2.48152	0	0.29777	0.948434	-0.738921
00000002_7.tif	smeared	11.562	11.25	5.66664	3.04658	-2.62006	0	0.29777	0.90718	-0.780174
00000002_7.tif	smeared	11.781	11.016	5.66664	2.82379	-2.84284	0	0.29777	0.840841	-0.846513
00000002_7.tif	smeared	12.474	10.599	5.66664	2.1843	-3.48234	0	0.29777	0.650418	-1.03694
00000002_7.tif	smeared	12.943	10.422	5.66664	1.78769	-3.87895	0	0.29777	0.532321	-1.15503
00000002_7.tif	smeared	13.068	9.995	5.66664	1.8823	-3.78434	0	0.29777	0.560491	-1.12686
00000002_7.tif	smeared	13.391	10.339	5.66664	1.42299	-4.24365	0	0.29777	0.423724	-1.26363
00000002_7.tif	smeared	13.339	10.286	5.66664	1.49514	-4.1715	0	0.29777	0.445207	-1.24215
00000002_7.tif	smeared	13.354	10.177	5.66664	1.54381	-4.12283	0	0.29777	0.459699	-1.22766
00000002_7.tif	smeared	13.458	10.146	5.66664	1.4803	-4.18634	0	0.29777	0.440789	-1.24657
00000002_7.tif	smeared	13.411	10.635	5.66664	1.27434	-4.39229	0	0.29777	0.379461	-1.30789
00000002_7.tif	smeared	13.245	10.599	5.66664	1.44261	-4.22402	0	0.29777	0.429567	-1.25779
00000002_7.tif	smeared	13.203	11.177	5.66664	1.40415	-4.26249	0	0.29777	0.418114	-1.26924
00000002_7.tif	smeared	13.052	11.5	5.66664	1.60704	-4.05959	0	0.29777	0.47853	-1.20882
00000002_7.tif	smeared	12.859	11.297	5.66664	1.75807	-3.90856	0	0.29777	0.523501	-1.16385
00000002_7.tif	smeared	13.432	12.448	5.66664	1.79911	-3.86752	0	0.29777	0.535722	-1.15163
00000002_7.tif	smeared	11.849	11.698	5.66664	2.82281	-2.84383	0	0.29777	0.840548	-0.846807
00000002_7.tif	smeared	10.401	12.87	5.66664	4.56712	-1.09952	0	0.29777	1.35995	-0.327404
00000002_7.tif	smeared	10.74	12.943	5.66664	4.28837	-1.37827	0	0.29777	1.27695	-0.410408
00000002_7.tif	smeared	11.005	12.531	5.66664	3.87937	-1.78727	0	0.29777	1.15516	-0.532195
00000002_7.tif	smeared	11.031	12.365	5.66664	3.79603	-1.87061	0	0.29777	1.13034	-0.55701
00000002_7.tif	smeared	11.177	12.469	5.66664	3.69666	-1.96997	0	0.29777	1.10076	-0.586599
00000002_7.tif	smeared	11.255	12.427	5.66664	3.60862	-2.05802	0	0.29777	1.07454	-0.612816
00000002_7.tif	smeared	11.359	12.375	5.66664	3.49275	-2.17389	0	0.29777	1.04004	-0.647319
00000002_7.tif	smeared	11.458	12.818	5.66664	3.59271	-2.07393	0	0.29777	1.0698	-0.617554
00000002_7.tif	smeared	12.448	13.578	5.66664	3.29748	-2.36916	0	0.29777	0.98189	-0.705465
00000002_7.tif	smeared	13.339	13.802	5.66664	2.99886	-2.66777	0	0.29777	0.892972	-0.794383
00000002_7.tif	smeared	11.286	15.562	5.66664	5.5741	-0.09254	0	0.29777	1.6598	-0.0275556
00000002_7.tif	smeared	11.51	15.891	5.66664	5.71749	0.050853	1	0.29777	1.7025	0.0151425
00000002_7.tif	smeared	12.203	15.104	5.66664	4.68329	-0.983344	0	0.29777	1.39454	-0.29281
00000002_7.tif	smeared	12.318	15.073	5.66664	4.59847	-1.06817	0	0.29777	1.36929	-0.318069
00000002_7.tif	smeared	12.62	15.344	5.66664	4.70025	-0.966385	0	0.29777	1.39959	-0.28776
00000002_7.tif	smeared	12.984	15.536	5.66664	4.73852	-0.928114	0	0.29777	1.41099	-0.276364
00000002_7.tif	smeared	11.484	17.448	5.66664	7.08856	1.42192	1	0.29777	2.11076	0.423405
00000002_7.tif	smeared	11.568	17.573	5.66664	7.16501	1.49837	1	0.29777	2.13353	0.446171
00000002_7.tif	smeared	14.922	18.99	5.66664	7.91339	2.24675	1	0.29777	2.35637	0.669016
00000002_7.tif	smeared	16.5	17.932	5.66664	7.10659	1.43995	1	0.29777	2.11613	0.428774
00000002_7.tif	smeared	16.375	17.333	5.66664	6.49607	0.829433	1	0.29777	1.93434	0.24698
00000002_7.tif	smeared	16.609	17.005	5.66664	6.25221	0.585571	1	0.29777	1.86172	0.174365
00000002_7.tif	smeared	16.536	17.01	5.66664	6.23394	0.567298	1	0.29777	1.85628	0.168924
00000002_7.tif	smeared	14.562	14.214	5.66664	3.13128	-2.53536	0	0.29777	0.932402	-0.754953
00000002_7.tif	smeared	15.531	13.828	5.66664	2.8973	-2.76934	0	0.29777	0.862729	-0.824625
00000002_7.tif	smeared	14.875	13.51	5.66664	2.44208	-3.22455	0	0.29777	0.727179	-0.960176
00000002_7.tif	smeared	15.734	13.344	5.66664	2.52765	-3.13899	0	0.29777	0.752659	-0.934696
00000002_7.tif	smeared	16.177	14.63	5.66664	3.88015	-1.78649	0	0.29777	1.15539	-0.531963
00000002_7.tif	smeared	16.104	14.536	5.66664	3.76473	-1.90191	0	0.29777	1.12102	-0.56633
00000002_7.tif	smeared	13.927	12.531	5.66664	1.59845	-4.06819	0	0.29777	0.47597	-1.21139
00000002_7.tif	smeared	13.906	12.479	5.66664	1.56078	-4.10586	0	0.29777	0.464752	-1.2226
00000002_7.tif	smeared	13.536	13.276	5.66664	2.43924	-3.2274	0	0.29777	0.726331	-0.961023
00000002_7.tif	smeared	13.854	12.214	5.66664	1.35708	-4.30956	0	0.29777	0.404097	-1.28326
00000002_7.tif	smeared	14.359	12.37	5.66664	1.31011	-4.35653	0	0.29777	0.390112	-1.29724
00000002_7.tif	smeared	14.703	11.844	5.66664	0.767413	-4.89923	0	0.29777	0.228512	-1.45884
00000002_7.tif	smeared	14.87	11.99	5.66664	0.945201	-4.72144	0	0.29777	0.281453	-1.4059
00000002_7.tif	smeared	15.156	12.083	5.66664	1.14224	-4.5244	0	0.29777	0.340124	-1.34723
00000002_7.tif	smeared	15.078	12.151	5.66664	1.16846	-4.49818	0	0.29777	0.347932	-1.33942
00000002_7.tif	smeared	15.818	12.615	5.66664	1.95469	-3.71195	0	0.29777	0.582049	-1.10531
00000002_7.tif	smeared	16.177	12.13	5.66664	1.88959	-3.77705	0	0.29777	0.562662	-1.12469
00000002_7.tif	smeared	17.089	11.646	5.66664	2.54798	-3.11866	0	0.29777	0.758712	-0.928643
00000002_7.tif	smeared	14.042	11.432	5.66664	0.661547	-5.00509	0	0.29777	0.196989	-1.49037
00000002_7.tif	smeared	14.307	11.495	5.66664	0.507891	-5.15875	0	0.29777	0.151235	-1.53612
00000002_7.tif	smeared	13.99	10.724	5.66664	0.71125	-4.95539	0	0.29777	0.211789	-1.47557
00000002_7.tif	smeared	14.172	10.938	5.66664	0.455685	-5.21095	0	0.29777	0.135689	-1.55167
00000002_7.tif	smeared	14.359	10.786	5.66664	0.385012	-5.28163	0	0.29777	0.114645	-1.57271
00000002_7.tif	smeared	14.495	10.969	5.66664	0.157724	-5.50891	0	0.29777	0.0469656	-1.64039
00000002_7.tif	smeared	14.583	10.979	5.66664	0.106099	-5.56054	0	0.29777	0.0315931	-1.65576
00000002_7.tif	smeared	14.599	11.328	5.66664	0.245051	-5.42159	0	0.29777	0.0729688	-1.61439
00000002_7.tif	smeared	15.37	11.411	5.66664	0.833271	-4.83337	0	0.29777	0.248123	-1.43923
00000002_7.tif	smeared	15.484	11.151	5.66664	0.882623	-4.78401	0	0.29777	0.262819	-1.42454
00000002_7.tif	smeared	15.375	10.943	5.66664	0.783608	-4.88303	0	0.29777	0.233335	-1.45402
00000002_7.tif	smeared	15.568	10.922	5.66664	0.977352	-4.68929	0	0.29777	0.291026	-1.39633
00000002_7.tif	smeared	15.688	11.083	5.66664	1.084	-4.58264	0	0.29777	0.322783	-1.36457
00000002_7.tif	smeared	15.714	11.365	5.66664	1.14526	-4.52138	0	0.29777	0.341025	-1.34633
00000002_7.tif	smeared	15.854	11.234	5.66664	1.25909	-4.40755	0	0.29777	0.374918	-1.31244
00000002_7.tif	smeared	16.479	11.24	5.66664	1.88156	-3.78508	0	0.29777	0.560273	-1.12708
00000002_7.tif	smeared	15.208	10.802	5.66664	0.666166	-5.00047	0	0.29777	0.198364	-1.48899
00000002_7.tif	smeared	14.479	10.682	5.66664	0.420031	-5.24661	0	0.29777	0.125073	-1.56228
00000002_7.tif	smeared	14.599	10.505	5.66664	0.578022	-5.08862	0	0.29777	0.172118	-1.51524
00000002_7.tif	smeared	14.667	10.479	5.66664	0.607277	-5.05936	0	0.29777	0.180829	-1.50653
00000002_7.tif	smeared	13.828	10.24	5.66664	1.14579	-4.52085	0	0.29777	0.341181	-1.34617
00000002_7.tif	smeared	13.854	10.104	5.66664	1.23326	-4.43337	0	0.29777	0.367229	-1.32013
00000002_7.tif	smeared	13.979	9.849	5.66664	1.38325	-4.28339	0	0.29777	0.41189	-1.27546
00000002_7.tif	smeared	14.057	9.656	5.66664	1.52825	-4.13839	0	0.29777	0.455066	-1.23229
00000002_7.tif	smeared	14.354	9.37	5.66664	1.73115	-3.93549	0	0.29777	0.515484	-1.17187
00000002_7.tif	smeared	14.354	9.307	5.66664	1.79351	-3.87313	0	0.29777	0.534053	-1.1533
00000002_7.tif	smeared	14.083	9.135	5.66664	2.01647	-3.65017	0	0.29777	0.600444	-1.08691
00000002_7.tif	smeared	14.229	9.109	5.66664	2.0093	-3.65733	0	0.29777	0.59831	-1.08904
00000002_7.tif	smeared	14.24	8.964	5.66664	2.15004	-3.5166	0	0.29777	0.640216	-1.04714
00000002_7.tif	smeared	14.609	9.333	5.66664	1.75001	-3.91663	0	0.29777	0.5211	-1.16626
00000002_7.tif	smeared	15.141	9.63	5.66664	1.54906	-4.11758	0	0.29777	0.461263	-1.22609
00000002_7.tif	smeared	15.12	9.745	5.66664	1.43405	-4.23259	0	0.29777	0.427017	-1.26034
00000002_7.tif	smeared	15.214	9.714	5.66664	1.49875	-4.16788	0	0.29777	0.446284	-1.24107
00000002_7.tif	smeared	15.286	9.74	5.66664	1.50624	-4.16039	0	0.29777	0.448514	-1.23884
00000002_7.tif	smeared	15.302	9.719	5.66664	1.53222	-4.13442	0	0.29777	0.456249	-1.23111
00000002_7.tif	smeared	15.266	9.958	5.66664	1.30532	-4.36131	0	0.29777	0.388686	-1.29867
00000002_7.tif	smeared	15.359	10.052	5.66664	1.27788	-4.38875	0	0.29777	0.380515	-1.30684
00000002_7.tif	smeared	15.208	10.255	5.66664	1.02489	-4.64175	0	0.29777	0.305182	-1.38217
00000002_7.tif	smeared	15.547	9.922	5.66664	1.49572	-4.17092	0	0.29777	0.44538	-1.24197
00000002_7.tif	smeared	15.562	9.703	5.66664	1.67993	-3.98671	0	0.29777	0.500233	-1.18712
00000002_7.tif	smeared	15.703	9.76	5.66664	1.71992	-3.94672	0	0.29777	0.512141	-1.17521
00000002_7.tif	smeared	15.766	9.859	5.66664	1.68773	-3.97891	0	0.29777	0.502554	-1.1848
00000002_7.tif	smeared	16.474	9.682	5.66664	2.3366	-3.33004	0	0.29777	0.695769	-0.991585
00000002_7.tif	smeared	16.74	9.604	5.66664	2.59806	-3.06857	0	0.29777	0.773626	-0.913729
00000002_7.tif	smeared	16.88	9.609	5.66664	2.71161	-2.95502	0	0.29777	0.807437	-0.879917
00000002_7.tif	smeared	16.875	9.484	5.66664	2.77745	-2.88919	0	0.29777	0.827042	-0.860313
00000002_7.tif	smeared	17.094	9.396	5.66664	3.00767	-2.65897	0	0.29777	0.895593	-0.791761
00000002_7.tif	smeared	17.193	9.667	5.66664	2.95093	-2.71571	0	0.29777	0.878698	-0.808657
00000002_7.tif	smeared	14.911	8.938	5.66664	2.16686	-3.49978	0	0.29777	0.645225	-1.04213
00000002_7.tif	smeared	15.51	8.802	5.66664	2.45434	-3.2123	0	0.29777	0.73083	-0.956525
00000002_7.tif	smeared	15.823	8.786	5.66664	2.60042	-3.06622	0	0.29777	0.774326	-0.913028
00000002_7.tif	smeared	16	8.328	5.66664	3.0885	-2.57814	0	0.29777	0.919663	-0.767692
00000002_7.tif	smeared	16.839	8.354	5.66664	3.52742	-2.13922	0	0.29777	1.05036	-0.636996
00000002_7.tif	smeared	16.927	8.521	5.66664	3.45835	-2.20829	0	0.29777	1.02979	-0.657562
00000002_7.tif	smeared	16.875	8.625	5.66664	3.34652	-2.32012	0	0.29777	0.996494	-0.690861
00000002_7.tif	smeared	16.922	7.922	5.66664	3.91983	-1.74681	0	0.29777	1.16721	-0.520148
00000002_7.tif	smeared	14.396	8.109	5.66664	2.98126	-2.68537	0	0.29777	0.887731	-0.799623
00000002_7.tif	smeared	14.438	7.927	5.66664	3.16036	-2.50628	0	0.29777	0.941061	-0.746294
00000002_7.tif	smeared	14.479	7.823	5.66664	3.2624	-2.40424	0	0.29777	0.971444	-0.715911
00000002_7.tif	smeared	14.62	7.807	5.66664	3.27604	-2.3906	0	0.29777	0.975506	-0.711849
00000002_7.tif	smeared	13.542	7.536	5.66664	3.70257	-1.96406	0	0.29777	1.10252	-0.584839
00000002_7.tif	smeared	13.599	7.094	5.66664	4.11365	-1.55298	0	0.29777	1.22492	-0.462432
00000002_7.tif	smeared	15.479	6.979	5.66664	4.19624	-1.4704	0	0.29777	1.24951	-0.43784
00000002_7.tif	smeared	15.536	6.885	5.66664	4.30021	-1.36643	0	0.29777	1.28047	-0.40688
00000002_7.tif	smeared	13.661	4.219	5.66664	6.92847	1.26184	1	0.29777	2.06309	0.375737
00000002_7.tif	smeared	14.01	3.891	5.66664	7.21649	1.54985	1	0.29777	2.14885	0.461499
00000002_7.tif	smeared	14.13	3.984	5.66664	7.11481	1.44817	1	0.29777	2.11858	0.431221
00000002_7.tif	smeared	15.323	2.844	5.66664	8.27031	2.60368	1	0.29777	2.46265	0.775296
00000002_7.tif	smeared	15.562	2.703	5.66664	8.43458	2.76794	1	0.29777	2.51157	0.824211
00000002_7.tif	smeared	17.964	7.005	5.66664	5.28391	-0.38273	0	0.29777	1.57339	-0.113965
00000002_7.tif	smeared	18.062	7.099	5.66664	5.27542	-0.391221	0	0.29777	1.57086	-0.116494
00000002_7.tif	smeared	19.391	6.578	5.66664	6.57346	0.906824	1	0.29777	1.95738	0.270025
00000002_7.tif	smeared	19.74	7.214	5.66664	6.43021	0.763577	1	0.29777	1.91472	0.22737
00000002_7.tif	smeared	19.812	7.531	5.66664	6.30396	0.637327	1	0.29777	1.87713	0.189777
00000002_7.tif	smeared	19.25	7.505	5.66664	5.86408	0.197439	1	0.29777	1.74615	0.0587915
00000002_7.tif	smeared	19.24	7.656	5.66664	5.76514	0.0985011	1	0.29777	1.71669	0.0293307
00000002_7.tif	smeared	19.078	7.719	5.66664	5.5976	-0.0690336	0	0.29777	1.6668	-0.0205561
00000002_7.tif	smeared	19.198	7.797	5.66664	5.64824	-0.0183962	0	0.29777	1.68188	-0.00547784
00000002_7.tif	smeared	19.292	7.922	5.66664	5.65414	-0.0125007	0	0.29777	1.68363	-0.00372234
00000002_7.tif	smeared	19.151	8.578	5.66664	5.19136	-0.475276	0	0.29777	1.54583	-0.141523
00000002_7.tif	smeared	18.995	8.703	5.66664	4.99453	-0.672113	0	0.29777	1.48722	-0.200135
00000002_7.tif	smeared	17.432	9.021	5.66664	3.49992	-2.16672	0	0.29777	1.04217	-0.645184
00000002_7.tif	smeared	17.75	9.948	5.66664	3.34448	-2.32216	0	0.29777	0.995886	-0.691469
00000002_7.tif	smeared	17.734	10.078	5.66664	3.28739	-2.37925	0	0.29777	0.978886	-0.708469
00000002_7.tif	smeared	18.703	11.344	5.66664	4.1073	-1.55934	0	0.29777	1.22303	-0.464324
00000002_7.tif	smeared	18.891	11.089	5.66664	4.287	-1.37963	0	0.29777	1.27654	-0.410813
00000002_7.tif	smeared	19.484	11.656	5.66664	4.91353	-0.753113	0	0.29777	1.4631	-0.224254
00000002_7.tif	smeared	17.854	12.094	5.66664	3.40362	-2.26302	0	0.29777	1.0135	-0.673859
00000002_7.tif	smeared	17.88	12.24	5.66664	3.47431	-2.19233	0	0.29777	1.03455	-0.65281
00000002_7.tif	smeared	17.865	12.453	5.66664	3.53709	-2.12955	0	0.29777	1.05324	-0.634115
00000002_7.tif	smeared	17.922	13.047	5.66664	3.8557	-1.81094	0	0.29777	1.14811	-0.539243
00000002_7.tif	smeared	19.161	13.036	5.66664	4.95787	-0.708769	0	0.29777	1.4763	-0.21105
00000002_7.tif	smeared	19.604	12.839	5.66664	5.29939	-0.367248	0	0.29777	1.578	-0.109355
00000002_7.tif	smeared	20.302	13.536	5.66664	6.20358	0.536943	1	0.29777	1.84724	0.159886
00000002_7.tif	smeared	18.818	15.302	5.66664	5.96303	0.296395	1	0.29777	1.77561	0.0882575
00000002_7.tif	smeared	19.167	15.349	5.66664	6.24658	0.579939	1	0.29777	1.86004	0.172689
00000002_7.tif	smeared	17.464	14.771	5.66664	4.66701	-0.999632	0	0.29777	1.38969	-0.29766
00000002_7.tif	smeared	19.635	16.286	5.66664	7.23755	1.57092	1	0.29777	2.15513	0.467771
00000002_7.tif	smeared	19.844	17.26	5.66664	8.10018	2.43354	1	0.29777	2.41199	0.724636
00000002_7.tif	smeared	19.776	17.385	5.66664	8.15259	2.48596	1	0.29777	2.4276	0.740243
00000002_7.tif	smeared	19.943	17.797	5.66664	8.57804	2.9114	1	0.29777	2.55428	0.866927
00000002_7.tif	smeared	19.833	18.344	5.66664	8.94788	3.28124	1	0.29777	2.66441	0.977056
00000002_7.tif	smeared	20.24	17.995	5.66664	8.91853	3.2519	1	0.29777	2.65567	0.968317
00000002_7.tif	smeared	20.286	17.932	5.66664	8.8991	3.23246	1	0.29777	2.64988	0.962529
00000002_7.tif	smeared	20.568	18.286	5.66664	9.3516	3.68497	1	0.29777	2.78463	1.09727
00000002_7.tif	smeared	20.766	18.286	5.66664	9.47911	3.81247	1	0.29777	2.82259	1.13524
00000002_7.tif	smeared	20.859	18.135	5.66664	9.42633	3.75969	1	0.29777	2.80688	1.11952
00000002_7.tif	smeared	20.823	17.521	5.66664	8.95119	3.28455	1	0.29777	2.6654	0.978041
00000002_7.tif	smeared	21.922	16.964	5.66664	9.38825	3.72161	1	0.29777	2.79554	1.10819
00000002_7.tif	smeared	21.943	16.708	5.66664	9.2467	3.58007	1	0.29777	2.75339	1.06604
00000002_7.tif	smeared	20.594	16.542	5.66664	8.10437	2.43773	1	0.29777	2.41324	0.725883
00000002_7.tif	smeared	21.271	16.078	5.66664	8.3306	2.66396	1	0.29777	2.4806	0.793248
00000002_7.tif	smeared	20.693	15.651	5.66664	7.612	1.94536	1	0.29777	2.26663	0.579271
00000002_7.tif	smeared	20.979	15.474	5.66664	7.7409	2.07426	1	0.29777	2.30501	0.617653
00000002_7.tif	smeared	20.911	14.807	5.66664	7.32437	1.65773	1	0.29777	2.18098	0.493624
00000002_7.tif	smeared	21.844	14.318	5.66664	7.92987	2.26323	1	0.29777	2.36128	0.673922
00000002_7.tif	smeared	22.469	14.182	5.66664	8.45352	2.78688	1	0.29777	2.51721	0.82985
00000002_7.tif	smeared	22.729	14.312	5.66664	8.74312	3.07648	1	0.29777	2.60344	0.916083
00000002_7.tif	smeared	22.667	14.5	5.66664	8.75716	3.09052	1	0.29777	2.60762	0.920265
00000002_7.tif	smeared	22.896	15.229	5.66664	9.27074	3.6041	1	0.29777	2.76055	1.07319
00000002_7.tif	smeared	23.042	15.208	5.66664	9.39231	3.72567	1	0.29777	2.79675	1.10939
00000002_7.tif	smeared	22.484	13.5	5.66664	8.24235	2.57571	1	0.29777	2.45432	0.766969
00000002_7.tif	smeared	22.557	13.391	5.66664	8.28113	2.61449	1	0.29777	2.46587	0.778517
00000002_7.tif	smeared	22.62	13.177	5.66664	8.28499	2.61835	1	0.29777	2.46702	0.779667
00000002_7.tif	smeared	22.339	13.141	5.66664	8.0041	2.33746	1	0.29777	2.38338	0.696026
00000002_7.tif	smeared	22.333	12.068	5.66664	7.79151	2.12487	1	0.29777	2.32008	0.632724
00000002_7.tif	smeared	22.943	11.766	5.66664	8.36692	2.70029	1	0.29777	2.49142	0.804064
00000002_7.tif	smeared	23.062	11.766	5.66664	8.48553	2.81889	1	0.29777	2.52674	0.839382
00000002_7.tif	smeared	23.188	11.677	5.66664	8.60453	2.93789	1	0.29777	2.56217	0.874815
00000002_7.tif	smeared	23	11.536	5.66664	8.40821	2.74157	1	0.29777	2.50371	0.816359
00000002_7.tif	smeared	23.125	11.12	5.66664	8.52108	2.85444	1	0.29777	2.53732	0.849967
00000002_7.tif	smeared	23.083	10.964	5.66664	8.47984	2.8132	1	0.29777	2.52504	0.837686
00000002_7.tif	smeared	22.495	10.276	5.66664	7.93216	2.26552	1	0.29777	2.36196	0.674604
00000002_7.tif	smeared	21.984	10.146	5.66664	7.43925	1.77261	1	0.29777	2.21518	0.527829
00000002_7.tif	smeared	21.901	10.182	5.66664	7.35242	1.68578	1	0.29777	2.18933	0.501974
00000002_7.tif	smeared	21.38	8.281	5.66664	7.33249	1.66585	1	0.29777	2.18339	0.49604
00000002_7.tif	smeared	21.464	8.141	5.66664	7.46425	1.79761	1	0.29777	2.22263	0.535274
00000002_7.tif	smeared	21.625	8.042	5.66664	7.65128	1.98464	1	0.29777	2.27832	0.590968
00000002_7.tif	smeared	20.719	5.568	5.66664	8.23459	2.56795	1	0.29777	2.45201	0.764659
00000002_7.tif	smeared	20.51	5.438	5.66664	8.16988	2.50324	1	0.29777	2.43274	0.745389
00000002_7.tif	smeared	21.208	5.38	5.66664	8.72565	3.05902	1	0.29777	2.59824	0.910883
00000003_5.tif	predator	6.052	17.031	4.92706	8.49334	3.56628	1	0.29777	2.52906	1.06193
00000003_5.tif	predator	5.894	17.366	4.92706	8.81207	3.88501	1	0.29777	2.62397	1.15684
00000003_5.tif	predator	6.72	18.561	4.92706	8.93327	4.00621	1	0.29777	2.66006	1.19293
00000003_5.tif	predator	6.984	18.707	4.92706	8.85	3.92295	1	0.29777	2.63527	1.16814
00000003_5.tif	predator	7.102	18.727	4.92706	8.78293	3.85587	1	0.29777	2.61529	1.14816
00000003_5.tif	predator	7.255	18.755	4.92706	8.69916	3.7721	1	0.29777	2.59035	1.12322
00000003_5.tif	predator	8.99	3.078	4.92706	10.1509	5.22379	1	0.29777	3.02262	1.55549
00000003_5.tif	predator	8.979	3.214	4.92706	10.0314	5.10435	1	0.29777	2.98705	1.51992
00000003_5.tif	predator	9.266	3.276	4.92706	9.85889	4.93184	1	0.29777	2.93568	1.46855
00000003_5.tif	predator	9.448	3.161	4.92706	9.89553	4.96847	1	0.29777	2.94659	1.47946
00000003_5.tif	predator	9.615	3.083	4.92706	9.9074	4.98034	1	0.29777	2.95013	1.483
00000003_5.tif	predator	9.672	3.016	4.92706	9.95007	5.02301	1	0.29777	2.96283	1.4957
00000003_5.tif	predator	9.792	3.089	4.92706	9.84026	4.9132	1	0.29777	2.93013	1.463
00000003_5.tif	predator	9.875	3.01	4.92706	9.88692	4.95986	1	0.29777	2.94403	1.4769
00000003_5.tif	predator	10.036	3.24	4.92706	9.617	4.68994	1	0.29777	2.86365	1.39652
00000003_5.tif	predator	10.266	2.984	4.92706	9.78983	4.86277	1	0.29777	2.91512	1.44799
00000003_5.tif	predator	9.062	4.104	4.92706	9.19168	4.26462	1	0.29777	2.73701	1.26988
00000003_5.tif	predator	8.464	5.042	4.92706	8.66819	3.74113	1	0.29777	2.58113	1.114
00000003_5.tif	predator	8.469	5.161	4.92706	8.56546	3.6384	1	0.29777	2.55054	1.08341
00000003_5.tif	predator	8.682	5.562	4.92706	8.11324	3.18619	1	0.29777	2.41588	0.948751
00000003_5.tif	predator	10.453	5.26	4.92706	7.57471	2.64765	1	0.29777	2.25552	0.78839
00000003_5.tif	predator	9.859	4.682	4.92706	8.33297	3.40591	1	0.29777	2.48131	1.01418
00000003_5.tif	predator	8.656	6.38	4.92706	7.4586	2.53154	1	0.29777	2.22095	0.753818
00000003_5.tif	predator	8.745	6.781	4.92706	7.08654	2.15948	1	0.29777	2.11016	0.643029
00000003_5.tif	predator	8.094	6.677	4.92706	7.58463	2.65757	1	0.29777	2.25847	0.791344
00000003_5.tif	predator	8.677	20.406	4.92706	9.21247	4.28541	1	0.29777	2.7432	1.27607
00000003_5.tif	predator	8.807	20.38	4.92706	9.12737	4.20031	1	0.29777	2.71786	1.25073
00000003_5.tif	predator	12.99	21.161	4.92706	8.81819	3.89113	1	0.29777	2.62579	1.15866
00000003_5.tif	predator	11.365	3.839	4.92706	8.68723	3.76017	1	0.29777	2.5868	1.11967
00000003_5.tif	predator	11.469	3.781	4.92706	8.72356	3.7965	1	0.29777	2.59761	1.13048
00000003_5.tif	predator	12.536	1.682	4.92706	10.6788	5.75175	1	0.29777	3.17983	1.7127
00000003_5.tif	predator	12.656	1.594	4.92706	10.7607	5.83361	1	0.29777	3.2042	1.73707
00000003_5.tif	predator	12.792	2.036	4.92706	10.3137	5.38665	1	0.29777	3.07111	1.60398
00000003_5.tif	predator	13.099	2.562	4.92706	9.78207	4.85501	1	0.29777	2.91281	1.44568
00000003_5.tif	predator	13.12	2.755	4.92706	9.58901	4.66195	1	0.29777	2.85532	1.38819
00000003_5.tif	predator	13.76	2.328	4.92706	10.0355	5.10842	1	0.29777	2.98827	1.52114
00000003_5.tif	predator	13.854	2.266	4.92706	10.1036	5.17656	1	0.29777	3.00855	1.54142
00000003_5.tif	predator	13.734	3.568	4.92706	8.79642	3.86936	1	0.29777	2.61931	1.15218
00000003_5.tif	predator	13.625	3.74	4.92706	8.61794	3.69088	1	0.29777	2.56616	1.09903
00000003_5.tif	predator	14.427	3.161	4.92706	9.27344	4.34639	1	0.29777	2.76135	1.29422
00000003_5.tif	predator	14.406	3.026	4.92706	9.40428	4.47723	1	0.29777	2.80031	1.33318
00000003_5.tif	predator	14.422	2.927	4.92706	9.50454	4.57748	1	0.29777	2.83017	1.36304
00000003_5.tif	predator	15.255	3.167	4.92706	9.41869	4.49163	1	0.29777	2.8046	1.33747
00000003_5.tif	predator	13.219	20.911	4.92706	8.56741	3.64035	1	0.29777	2.55112	1.08399
00000003_5.tif	predator	15.24	20.688	4.92706	8.60543	3.67837	1	0.29777	2.56244	1.09531
00000003_5.tif	predator	15.51	20.786	4.92706	8.76972	3.84266	1	0.29777	2.61136	1.14423
00000003_5.tif	predator	15.531	20.682	4.92706	8.67543	3.74837	1	0.29777	2.58328	1.11615
00000003_5.tif	predator	15.938	20.396	4.92706	8.52593	3.59887	1	0.29777	2.53877	1.07164
00000003_5.tif	predator	16.333	20.542	4.92706	8.79968	3.87262	1	0.29777	2.62028	1.15315
00000003_5.tif	predator	16.401	20.505	4.92706	8.79026	3.8632	1	0.29777	2.61748	1.15035
00000003_5.tif	predator	16.75	20.375	4.92706	8.80711	3.88005	1	0.29777	2.62249	1.15536
00000003_5.tif	predator	16.562	20.266	4.92706	8.63148	3.70442	1	0.29777	2.5702	1.10307
00000003_5.tif	predator	18.443	20.812	4.92706	9.99409	5.06703	1	0.29777	2.97594	1.50881
00000003_5.tif	predator	18.495	20.729	4.92706	9.95177	5.02472	1	0.29777	2.96334	1.49621
00000003_5.tif	predator	18.865	20.943	4.92706	10.3332	5.40617	1	0.29777	3.07693	1.6098
00000003_5.tif	predator	18.229	19.807	4.92706	9.03577	4.10872	1	0.29777	2.69058	1.22345
00000003_5.tif	predator	18.01	19.729	4.92706	8.84895	3.92189	1	0.29777	2.63495	1.16782
00000003_5.tif	predator	19	19.724	4.92706	9.4267	4.49964	1	0.29777	2.80699	1.33986
00000003_5.tif	predator	18.995	19.599	4.92706	9.32602	4.39896	1	0.29777	2.77701	1.30988
00000003_5.tif	predator	18.099	18.417	4.92706	7.84364	2.91658	1	0.29777	2.3356	0.868469
00000003_5.tif	predator	18.115	17.531	4.92706	7.19064	2.26359	1	0.29777	2.14116	0.674028
00000003_5.tif	predator	18.021	17.536	4.92706	7.12951	2.20245	1	0.29777	2.12295	0.655823
00000003_5.tif	predator	18.948	16.786	4.92706	7.3159	2.38884	1	0.29777	2.17845	0.711324
00000003_5.tif	predator	19.526	8.26	4.92706	7.58445	2.6574	1	0.29777	2.25842	0.791293
00000003_5.tif	predator	19.609	7.391	4.92706	8.15137	3.22431	1	0.29777	2.42723	0.960104
00000003_5.tif	predator	16.99	4.401	4.92706	8.82906	3.902	1	0.29777	2.62903	1.1619
00000003_5.tif	predator	18.63	4.307	4.92706	9.73593	4.80887	1	0.29777	2.89907	1.43194
00000003_5.tif	predator	19.359	4.401	4.92706	10.0911	5.164	1	0.29777	3.00481	1.53768
00000003_5.tif	predator	18.854	3.865	4.92706	10.2274	5.30038	1	0.29777	3.04542	1.57829
00000003_5.tif	predator	18.802	3.734	4.92706	10.3076	5.38056	1	0.29777	3.0693	1.60217
00000003_5.tif	predator	19.026	3.719	4.92706	10.4448	5.51777	1	0.29777	3.11016	1.64303
00000003_5.tif	predator	19.276	3.63	4.92706	10.6605	5.73341	1	0.29777	3.17437	1.70724
00000003_5.tif	predator	19.245	3.385	4.92706	10.8442	5.9171	1	0.29777	3.22907	1.76194
00000003_5.tif	predator	18.745	3.281	4.92706	10.6588	5.73174	1	0.29777	3.17387	1.70674
00000003_5.tif	predator	18.698	3.036	4.92706	10.8437	5.91664	1	0.29777	3.22893	1.7618
00000003_5.tif	predator	18.302	3.109	4.92706	10.5822	5.65515	1	0.29777	3.15106	1.68393
00000003_5.tif	predator	18.188	3.073	4.92706	10.5586	5.63155	1	0.29777	3.14404	1.67691
00000003_5.tif	predator	17.432	3.318	4.92706	9.99664	5.06959	1	0.29777	2.9767	1.50957
00000003_5.tif	predator	16.49	3.276	4.92706	9.66875	4.74169	1	0.29777	2.87906	1.41193
00000003_5.tif	predator	20.766	5.276	4.92706	10.4014	5.47433	1	0.29777	3.09722	1.63009
00000003_5.tif	predator	20.719	5.51	4.92706	10.2088	5.28179	1	0.29777	3.03989	1.57276
00000003_5.tif	predator	20.38	5.714	4.92706	9.82074	4.89368	1	0.29777	2.92432	1.45719
00000003_5.tif	predator	20.542	6.057	4.92706	9.71545	4.78839	1	0.29777	2.89297	1.42584
00000003_5.tif	predator	21.51	7.036	4.92706	9.91542	4.98836	1	0.29777	2.95251	1.48538
00000003_5.tif	predator	21.104	7.677	4.92706	9.23503	4.30798	1	0.29777	2.74992	1.28279
00000003_5.tif	predator	20.771	7.745	4.92706	8.91399	3.98694	1	0.29777	2.65432	1.18719
00000003_5.tif	predator	20.573	7.693	4.92706	8.77244	3.84538	1	0.29777	2.61217	1.14504
00000003_5.tif	predator	19.922	7.958	4.92706	8.08086	3.15381	1	0.29777	2.40624	0.939109
00000003_5.tif	predator	20.281	8.115	4.92706	8.3036	3.37654	1	0.29777	2.47256	1.00543
00000003_5.tif	predator	22.005	8.089	4.92706	9.83778	4.91072	1	0.29777	2.9294	1.46227
00000003_5.tif	predator	21.453	8.984	4.92706	8.97099	4.04394	1	0.29777	2.67129	1.20416
00000003_5.tif	predator	21.609	9.052	4.92706	9.09098	4.16392	1	0.29777	2.70702	1.23989
00000003_5.tif	predator	22.474	9.172	4.92706	9.86299	4.93593	1	0.29777	2.9369	1.46977
00000003_5.tif	predator	20.323	12.547	4.92706	7.19087	2.26381	1	0.29777	2.14122	0.674094
00000003_5.tif	predator	21.286	12.885	4.92706	8.16893	3.24188	1	0.29777	2.43246	0.965333
00000003_5.tif	predator	21.927	15.141	4.92706	9.22618	4.29913	1	0.29777	2.74728	1.28015
00000003_5.tif	predator	22.24	15.76	4.92706	9.72471	4.79766	1	0.29777	2.89573	1.4286
00000003_5.tif	predator	22.26	16.823	4.92706	10.165	5.23793	1	0.29777	3.02683	1.5597
00000003_5.tif	predator	20.807	17.005	4.92706	8.97689	4.04983	1	0.29777	2.67305	1.20592
00000003_5.tif	predator	20.484	17.521	4.92706	8.98939	4.06233	1	0.29777	2.67677	1.20964
00000003_5.tif	predator	23.359	11.01	4.92706	10.3107	5.3836	1	0.29777	3.07021	1.60308
00000003_5.tif	predator	22.688	10.693	4.92706	9.69462	4.76756	1	0.29777	2.88677	1.41964
00000003_5.tif	predator	23.13	9.266	4.92706	10.4582	5.53115	1	0.29777	3.11414	1.64701
00000003_9.tif	smeared	5.182	11.51	5.7554	7.90866	2.15326	1	0.29777	2.35496	0.641177
00000003_9.tif	smeared	5.193	11.656	5.7554	7.89602	2.14062	1	0.29777	2.3512	0.637412
00000003_9.tif	smeared	5.411	11.802	5.7554	7.6791	1.9237	1	0.29777	2.28661	0.572821
00000003_9.tif	smeared	5.031	12.984	5.7554	8.16411	2.40871	1	0.29777	2.43103	0.717243
00000003_9.tif	smeared	4.964	13.234	5.7554	8.27378	2.51838	1	0.29777	2.46368	0.749899
00000003_9.tif	smeared	6.802	12.458	5.7554	6.33594	0.580545	1	0.29777	1.88665	0.172869
00000003_9.tif	smeared	6.755	12.24	5.7554	6.35942	0.604019	1	0.29777	1.89364	0.179859
00000003_9.tif	smeared	6.422	16.776	5.7554	8.39641	2.64101	1	0.29777	2.5002	0.786414
00000003_9.tif	smeared	6.286	16.766	5.7554	8.4988	2.74341	1	0.29777	2.53069	0.816904
00000003_9.tif	smeared	7.807	12.005	5.7554	5.29249	-0.462911	0	0.29777	1.57594	-0.137841
00000003_9.tif	smeared	7.578	11.604	5.7554	5.51142	-0.243978	0	0.29777	1.64114	-0.0726493
00000003_9.tif	smeared	7.505	11.245	5.7554	5.6003	-0.155095	0	0.29777	1.6676	-0.0461827
00000003_9.tif	smeared	8.094	11.604	5.7554	4.99546	-0.759935	0	0.29777	1.4875	-0.226286
00000003_9.tif	smeared	8.417	12.229	5.7554	4.70509	-1.05031	0	0.29777	1.40103	-0.312751
00000003_9.tif	smeared	8.927	12	5.7554	4.1749	-1.58049	0	0.29777	1.24316	-0.470623
00000003_9.tif	smeared	8.839	11.995	5.7554	4.26226	-1.49314	0	0.29777	1.26917	-0.444613
00000003_9.tif	smeared	8.859	11.875	5.7554	4.23487	-1.52053	0	0.29777	1.26102	-0.452768
00000003_9.tif	smeared	9.208	12.198	5.7554	3.91648	-1.83891	0	0.29777	1.16621	-0.547574
00000003_9.tif	smeared	9.271	12.094	5.7554	3.84125	-1.91415	0	0.29777	1.14381	-0.569975
00000003_9.tif	smeared	9.552	13.776	5.7554	4.11548	-1.63992	0	0.29777	1.22547	-0.488318
00000003_9.tif	smeared	9.703	13.745	5.7554	3.97018	-1.78522	0	0.29777	1.1822	-0.531584
00000003_9.tif	smeared	9.714	13.089	5.7554	3.6604	-2.095	0	0.29777	1.08996	-0.623828
00000003_9.tif	smeared	9.505	12.74	5.7554	3.73974	-2.01565	0	0.29777	1.11358	-0.600201
00000003_9.tif	smeared	10.172	12.401	5.7554	3.00671	-2.74868	0	0.29777	0.895309	-0.818475
00000003_9.tif	smeared	10.401	12.062	5.7554	2.71615	-3.03925	0	0.29777	0.808787	-0.904998
00000003_9.tif	smeared	11.562	13.599	5.7554	2.45867	-3.29673	0	0.29777	0.732118	-0.981667
00000003_9.tif	smeared	11.615	13.792	5.7554	2.58207	-3.17333	0	0.29777	0.768862	-0.944922
00000003_9.tif	smeared	11.172	14.302	5.7554	3.2545	-2.50089	0	0.29777	0.969093	-0.744691
00000003_9.tif	smeared	11.078	15.068	5.7554	3.94676	-1.80863	0	0.29777	1.17523	-0.538557
00000003_9.tif	smeared	7.812	10.688	5.7554	5.36796	-0.387438	0	0.29777	1.59842	-0.115368
00000003_9.tif	smeared	7.724	10.359	5.7554	5.52333	-0.232066	0	0.29777	1.64468	-0.0691022
00000003_9.tif	smeared	8.302	10.25	5.7554	4.99374	-0.761656	0	0.29777	1.48699	-0.226798
00000003_9.tif	smeared	8.375	10.203	5.7554	4.93759	-0.817811	0	0.29777	1.47027	-0.24352
00000003_9.tif	smeared	8.917	10.849	5.7554	4.2524	-1.503	0	0.29777	1.26624	-0.447547
00000003_9.tif	smeared	9.026	10.818	5.7554	4.15178	-1.60362	0	0.29777	1.23628	-0.477509
00000003_9.tif	smeared	9.214	11.24	5.7554	3.89901	-1.85639	0	0.29777	1.16101	-0.552778
00000003_9.tif	smeared	10.635	11.13	5.7554	2.51314	-3.24226	0	0.29777	0.748338	-0.965447
00000003_9.tif	smeared	10.891	10.943	5.7554	2.31574	-3.43966	0	0.29777	0.689557	-1.02423
00000003_9.tif	smeared	11.062	10.906	5.7554	2.16691	-3.58849	0	0.29777	0.64524	-1.06854
00000003_9.tif	smeared	11.365	11.453	5.7554	1.73785	-4.01754	0	0.29777	0.517481	-1.1963
00000003_9.tif	smeared	11.51	11.349	5.7554	1.6117	-4.1437	0	0.29777	0.479915	-1.23387
00000003_9.tif	smeared	11.339	11.208	5.7554	1.81047	-3.94493	0	0.29777	0.539103	-1.17468
00000003_9.tif	smeared	11.672	11.286	5.7554	1.46863	-4.28676	0	0.29777	0.437315	-1.27647
00000003_9.tif	smeared	11.641	11.427	5.7554	1.46858	-4.28682	0	0.29777	0.437299	-1.27649
00000003_9.tif	smeared	11.453	11.719	5.7554	1.63667	-4.11872	0	0.29777	0.487353	-1.22643
00000003_9.tif	smeared	11.531	11.839	5.7554	1.56692	-4.18847	0	0.29777	0.466583	-1.2472
00000003_9.tif	smeared	11.323	11.901	5.7554	1.78079	-3.97461	0	0.29777	0.530264	-1.18352
00000003_9.tif	smeared	11.661	11.776	5.7554	1.43178	-4.32362	0	0.29777	0.426342	-1.28744
00000003_9.tif	smeared	9.036	9.422	5.7554	4.63566	-1.11974	0	0.29777	1.38036	-0.333425
00000003_9.tif	smeared	9.771	9.047	5.7554	4.23081	-1.52459	0	0.29777	1.25981	-0.453977
00000003_9.tif	smeared	9.672	8.969	5.7554	4.35684	-1.39855	0	0.29777	1.29734	-0.416447
00000003_9.tif	smeared	9.62	8.625	5.7554	4.61716	-1.13824	0	0.29777	1.37485	-0.338933
00000003_9.tif	smeared	9.214	8.443	5.7554	5.04401	-0.711385	0	0.29777	1.50196	-0.211829
00000003_9.tif	smeared	9.349	8.365	5.7554	4.99238	-0.763018	0	0.29777	1.48658	-0.227204
00000003_9.tif	smeared	10.401	9.344	5.7554	3.55597	-2.19943	0	0.29777	1.05886	-0.654923
00000003_9.tif	smeared	10.505	9.438	5.7554	3.41582	-2.33958	0	0.29777	1.01713	-0.696657
00000003_9.tif	smeared	10.417	9.516	5.7554	3.43335	-2.32204	0	0.29777	1.02235	-0.691435
00000003_9.tif	smeared	10.505	9.703	5.7554	3.24869	-2.5067	0	0.29777	0.967364	-0.746421
00000003_9.tif	smeared	10.604	10.292	5.7554	2.84247	-2.91293	0	0.29777	0.846402	-0.867383
00000003_9.tif	smeared	10.719	10.005	5.7554	2.89755	-2.85785	0	0.29777	0.862803	-0.850982
00000003_9.tif	smeared	10.818	10	5.7554	2.82011	-2.93529	0	0.29777	0.839744	-0.87404
00000003_9.tif	smeared	10.969	9.802	5.7554	2.82689	-2.92851	0	0.29777	0.841763	-0.872022
00000003_9.tif	smeared	10.63	9.167	5.7554	3.51023	-2.24517	0	0.29777	1.04524	-0.668544
00000003_9.tif	smeared	11.234	9.266	5.7554	3.03807	-2.71733	0	0.29777	0.904646	-0.809139
00000003_9.tif	smeared	11.594	9.406	5.7554	2.71473	-3.04066	0	0.29777	0.808366	-0.905418
00000003_9.tif	smeared	11.411	8.974	5.7554	3.17725	-2.57815	0	0.29777	0.946088	-0.767696
00000003_9.tif	smeared	11.245	8.859	5.7554	3.36353	-2.39187	0	0.29777	1.00156	-0.712228
00000003_9.tif	smeared	10.849	8.599	5.7554	3.80275	-1.95264	0	0.29777	1.13235	-0.581439
00000003_9.tif	smeared	11.38	7.385	5.7554	4.61509	-1.14031	0	0.29777	1.37424	-0.33955
00000003_9.tif	smeared	8.828	6.818	5.7554	6.4589	0.703506	1	0.29777	1.92327	0.209483
00000003_9.tif	smeared	8.771	6.693	5.7554	6.59057	0.835169	1	0.29777	1.96247	0.248688
00000003_9.tif	smeared	8.146	6.354	5.7554	7.26047	1.50507	1	0.29777	2.16195	0.448164
00000003_9.tif	smeared	8.052	6.182	5.7554	7.4506	1.6952	1	0.29777	2.21857	0.504781
00000003_9.tif	smeared	9.401	5.141	5.7554	7.50035	1.74496	1	0.29777	2.23338	0.519596
00000003_9.tif	smeared	9.667	4.99	5.7554	7.50728	1.75188	1	0.29777	2.23544	0.521657
00000003_9.tif	smeared	9.844	4.62	5.7554	7.76278	2.00738	1	0.29777	2.31152	0.597738
00000003_9.tif	smeared	9.938	4.557	5.7554	7.78152	2.02612	1	0.29777	2.3171	0.603318
00000003_9.tif	smeared	9.953	4.078	5.7554	8.21604	2.46064	1	0.29777	2.44649	0.732706
00000003_9.tif	smeared	12.797	6.776	5.7554	4.9047	-0.850698	0	0.29777	1.46047	-0.253312
00000003_9.tif	smeared	12.724	6.833	5.7554	4.85275	-0.902651	0	0.29777	1.445	-0.268782
00000003_9.tif	smeared	12.771	6.974	5.7554	4.70875	-1.04665	0	0.29777	1.40212	-0.31166
00000003_9.tif	smeared	12.094	8.219	5.7554	3.5935	-2.1619	0	0.29777	1.07004	-0.643749
00000003_9.tif	smeared	12.182	8.167	5.7554	3.62045	-2.13495	0	0.29777	1.07806	-0.635723
00000003_9.tif	smeared	12.599	7.734	5.7554	3.96837	-1.78703	0	0.29777	1.18166	-0.532124
00000003_9.tif	smeared	13.047	8.146	5.7554	3.52625	-2.22915	0	0.29777	1.05001	-0.663773
00000003_9.tif	smeared	13.135	8.167	5.7554	3.5053	-2.2501	0	0.29777	1.04377	-0.670011
00000003_9.tif	smeared	13.25	8.198	5.7554	3.47773	-2.27767	0	0.29777	1.03556	-0.678221
00000003_9.tif	smeared	13.302	8.005	5.7554	3.67318	-2.08222	0	0.29777	1.09376	-0.620022
00000003_9.tif	smeared	13.182	7.911	5.7554	3.76215	-1.99325	0	0.29777	1.12026	-0.593529
00000003_9.tif	smeared	13.635	8.401	5.7554	3.31626	-2.43914	0	0.29777	0.987482	-0.726303
00000003_9.tif	smeared	13.766	8.354	5.7554	3.38636	-2.36903	0	0.29777	1.00836	-0.705427
00000003_9.tif	smeared	13.625	8.833	5.7554	2.88916	-2.86624	0	0.29777	0.860304	-0.853481
00000003_9.tif	smeared	13.87	8.932	5.7554	2.84913	-2.90626	0	0.29777	0.848386	-0.865398
00000003_9.tif	smeared	13.104	8.75	5.7554	2.92204	-2.83336	0	0.29777	0.870095	-0.843689
00000003_9.tif	smeared	14.005	9.604	5.7554	2.26179	-3.49361	0	0.29777	0.673492	-1.04029
00000003_9.tif	smeared	13.693	9.719	5.7554	2.04427	-3.71113	0	0.29777	0.608721	-1.10506
00000003_9.tif	smeared	12.714	9.755	5.7554	1.95333	-3.80206	0	0.29777	0.581644	-1.13214
00000003_9.tif	smeared	11.906	9.922	5.7554	2.11234	-3.64306	0	0.29777	0.628992	-1.08479
00000003_9.tif	smeared	12.016	9.891	5.7554	2.07925	-3.67615	0	0.29777	0.619139	-1.09465
00000003_9.tif	smeared	11.932	10.479	5.7554	1.6619	-4.0935	0	0.29777	0.494863	-1.21892
00000003_9.tif	smeared	12.208	10.521	5.7554	1.44947	-4.30593	0	0.29777	0.431609	-1.28218
00000003_9.tif	smeared	12.188	10.74	5.7554	1.29631	-4.45909	0	0.29777	0.386003	-1.32778
00000003_9.tif	smeared	12.464	10.328	5.7554	1.48221	-4.27318	0	0.29777	0.441359	-1.27243
00000003_9.tif	smeared	12.87	10.115	5.7554	1.57233	-4.18307	0	0.29777	0.468192	-1.24559
00000003_9.tif	smeared	11.812	10.932	5.7554	1.47592	-4.27948	0	0.29777	0.439484	-1.2743
00000003_9.tif	smeared	11.818	11.021	5.7554	1.42802	-4.32738	0	0.29777	0.425222	-1.28856
00000003_9.tif	smeared	11.849	11.167	5.7554	1.33889	-4.41651	0	0.29777	0.398681	-1.3151
00000003_9.tif	smeared	11.797	11.38	5.7554	1.32459	-4.43081	0	0.29777	0.394422	-1.31936
00000003_9.tif	smeared	12.208	11.719	5.7554	0.882253	-4.87314	0	0.29777	0.262708	-1.45108
00000003_9.tif	smeared	12.557	11.276	5.7554	0.663204	-5.09219	0	0.29777	0.197482	-1.5163
00000003_9.tif	smeared	12.51	11.057	5.7554	0.844669	-4.91073	0	0.29777	0.251517	-1.46227
00000003_9.tif	smeared	12.703	11.573	5.7554	0.398493	-5.3569	0	0.29777	0.118659	-1.59513
00000003_9.tif	smeared	12.792	11.516	5.7554	0.335477	-5.41992	0	0.29777	0.0998951	-1.61389
00000003_9.tif	smeared	12.818	11.245	5.7554	0.505737	-5.24966	0	0.29777	0.150593	-1.56319
00000003_9.tif	smeared	13.656	10.552	5.7554	1.25534	-4.50005	0	0.29777	0.373804	-1.33998
00000003_9.tif	smeared	13.943	10.448	5.7554	1.49248	-4.26292	0	0.29777	0.444415	-1.26937
00000003_9.tif	smeared	13.948	10.542	5.7554	1.41943	-4.33597	0	0.29777	0.422664	-1.29112
00000003_9.tif	smeared	13.927	10.682	5.7554	1.29705	-4.45835	0	0.29777	0.386223	-1.32756
00000003_9.tif	smeared	14.047	11.594	5.7554	0.96117	-4.79423	0	0.29777	0.286208	-1.42758
00000003_9.tif	smeared	13.031	11.609	5.7554	0.0856329	-5.66976	0	0.29777	0.0254989	-1.68829
00000003_9.tif	smeared	12.927	11.812	5.7554	0.214112	-5.54129	0	0.29777	0.0637562	-1.65003
00000003_9.tif	smeared	13.281	11.828	5.7554	0.247386	-5.50801	0	0.29777	0.0736642	-1.64012
00000003_9.tif	smeared	12.807	12.089	5.7554	0.503401	-5.252	0	0.29777	0.149898	-1.56389
00000003_9.tif	smeared	12.88	12.167	5.7554	0.537314	-5.21808	0	0.29777	0.159996	-1.55379
00000003_9.tif	smeared	13.297	12.161	5.7554	0.531399	-5.224	0	0.29777	0.158235	-1.55555
00000003_9.tif	smeared	13.391	12.151	5.7554	0.566255	-5.18914	0	0.29777	0.168614	-1.54517
00000003_9.tif	smeared	13.484	12.01	5.7554	0.519874	-5.23552	0	0.29777	0.154803	-1.55898
00000003_9.tif	smeared	13.552	12.042	5.7554	0.59268	-5.16272	0	0.29777	0.176482	-1.5373
00000003_9.tif	smeared	13.932	12.375	5.7554	1.09766	-4.65774	0	0.29777	0.32685	-1.38693
00000003_9.tif	smeared	14	12.625	5.7554	1.31838	-4.43702	0	0.29777	0.392574	-1.32121
00000003_9.tif	smeared	12.182	12.542	5.7554	1.2568	-4.4986	0	0.29777	0.374238	-1.33955
00000003_9.tif	smeared	11.859	12.495	5.7554	1.47994	-4.27546	0	0.29777	0.440682	-1.2731
00000003_9.tif	smeared	11.917	13.594	5.7554	2.25115	-3.50425	0	0.29777	0.670324	-1.04346
00000003_9.tif	smeared	12.078	13.839	5.7554	2.39124	-3.36416	0	0.29777	0.712038	-1.00175
00000003_9.tif	smeared	12.109	13.953	5.7554	2.48261	-3.27279	0	0.29777	0.739247	-0.974537
00000003_9.tif	smeared	12.547	13.911	5.7554	2.30367	-3.45173	0	0.29777	0.685963	-1.02782
00000003_9.tif	smeared	12.719	13.104	5.7554	1.47903	-4.27637	0	0.29777	0.44041	-1.27337
00000003_9.tif	smeared	13.115	13.224	5.7554	1.55222	-4.20318	0	0.29777	0.462204	-1.25158
00000003_9.tif	smeared	13.141	13.453	5.7554	1.78176	-3.97364	0	0.29777	0.530554	-1.18323
00000003_9.tif	smeared	13.938	13.885	5.7554	2.37027	-3.38513	0	0.29777	0.705795	-1.00799
00000003_9.tif	smeared	13.974	13.62	5.7554	2.13961	-3.61579	0	0.29777	0.637112	-1.07667
00000003_9.tif	smeared	12.349	14.448	5.7554	2.87294	-2.88246	0	0.29777	0.855475	-0.85831
00000003_9.tif	smeared	12.432	14.526	5.7554	2.92865	-2.82675	0	0.29777	0.872063	-0.841722
00000003_9.tif	smeared	13.667	14.698	5.7554	3.08071	-2.67469	0	0.29777	0.917342	-0.796442
00000003_9.tif	smeared	14.036	15.333	5.7554	3.7815	-1.9739	0	0.29777	1.12602	-0.587768
00000003_9.tif	smeared	13.25	19.5	5.7554	7.82966	2.07426	1	0.29777	2.33144	0.617652
00000003_9.tif	smeared	13.406	19.651	5.7554	7.98529	2.2299	1	0.29777	2.37778	0.663996
00000003_9.tif	smeared	15.432	20.62	5.7554	9.24967	3.49427	1	0.29777	2.75427	1.04049
00000003_9.tif	smeared	15.438	20.495	5.7554	9.13034	3.37494	1	0.29777	2.71874	1.00496
00000003_9.tif	smeared	15.839	19.76	5.7554	8.54273	2.78733	1	0.29777	2.54377	0.829984
00000003_9.tif	smeared	18.016	19.182	5.7554	8.98195	3.22655	1	0.29777	2.67456	0.960771
00000003_9.tif	smeared	18.167	19.156	5.7554	9.04413	3.28874	1	0.29777	2.69307	0.979287
00000003_9.tif	smeared	14.193	14.724	5.7554	3.24554	-2.50986	0	0.29777	0.966424	-0.747361
00000003_9.tif	smeared	14.464	14.901	5.7554	3.50957	-2.24583	0	0.29777	1.04504	-0.668741
00000003_9.tif	smeared	14.479	15.047	5.7554	3.65003	-2.10537	0	0.29777	1.08687	-0.626915
00000003_9.tif	smeared	14.885	15.125	5.7554	3.89215	-1.86325	0	0.29777	1.15897	-0.554819
00000003_9.tif	smeared	14.854	15.073	5.7554	3.83171	-1.92368	0	0.29777	1.14097	-0.572815
00000003_9.tif	smeared	15.385	13.526	5.7554	2.95109	-2.80431	0	0.29777	0.878746	-0.835039
00000003_9.tif	smeared	16.021	13.245	5.7554	3.3273	-2.42809	0	0.29777	0.990771	-0.723013
00000003_9.tif	smeared	14.229	12.76	5.7554	1.57586	-4.17953	0	0.29777	0.469245	-1.24454
00000003_9.tif	smeared	14.427	12.568	5.7554	1.6103	-4.1451	0	0.29777	0.479498	-1.23429
00000003_9.tif	smeared	14.734	12.5	5.7554	1.84163	-3.91377	0	0.29777	0.548383	-1.1654
00000003_9.tif	smeared	18.391	12.646	5.7554	5.39072	-0.364676	0	0.29777	1.6052	-0.10859
00000003_9.tif	smeared	14.432	11.792	5.7554	1.34835	-4.40705	0	0.29777	0.401498	-1.31229
00000003_9.tif	smeared	14.651	11.708	5.7554	1.56241	-4.19298	0	0.29777	0.46524	-1.24854
00000003_9.tif	smeared	14.76	11.63	5.7554	1.67153	-4.08387	0	0.29777	0.497731	-1.21605
00000003_9.tif	smeared	14.099	11.63	5.7554	1.01087	-4.74452	0	0.29777	0.301008	-1.41278
00000003_9.tif	smeared	14.651	11.974	5.7554	1.59093	-4.16447	0	0.29777	0.47373	-1.24005
00000003_9.tif	smeared	16.208	11.859	5.7554	3.1246	-2.6308	0	0.29777	0.930412	-0.783372
00000003_9.tif	smeared	16.448	11.833	5.7554	3.36286	-2.39254	0	0.29777	1.00136	-0.712427
00000003_9.tif	smeared	16.302	11.63	5.7554	3.21327	-2.54212	0	0.29777	0.956817	-0.756968
00000003_9.tif	smeared	15.016	10.896	5.7554	2.07738	-3.67802	0	0.29777	0.618581	-1.0952
00000003_9.tif	smeared	15.224	10.88	5.7554	2.27717	-3.47823	0	0.29777	0.678072	-1.03571
00000003_9.tif	smeared	15.219	11.099	5.7554	2.20573	-3.54967	0	0.29777	0.656799	-1.05699
00000003_9.tif	smeared	15.599	10.896	5.7554	2.62722	-3.12818	0	0.29777	0.782307	-0.931478
00000003_9.tif	smeared	15.552	10.339	5.7554	2.80058	-2.95482	0	0.29777	0.833929	-0.879855
00000003_9.tif	smeared	16.438	10.224	5.7554	3.64863	-2.10677	0	0.29777	1.08645	-0.627332
00000003_9.tif	smeared	16.641	10.505	5.7554	3.7388	-2.0166	0	0.29777	1.1133	-0.600484
00000003_9.tif	smeared	16.698	10.5	5.7554	3.79453	-1.96087	0	0.29777	1.1299	-0.583887
00000003_9.tif	smeared	16.807	10.901	5.7554	3.7971	-1.9583	0	0.29777	1.13066	-0.583122
00000003_9.tif	smeared	16.964	10.547	5.7554	4.035	-1.72039	0	0.29777	1.2015	-0.512282
00000003_9.tif	smeared	17.021	10.182	5.7554	4.20485	-1.55055	0	0.29777	1.25208	-0.461708
00000003_9.tif	smeared	16.891	9.74	5.7554	4.26472	-1.49068	0	0.29777	1.26991	-0.443879
00000003_9.tif	smeared	16.474	9.453	5.7554	4.04749	-1.70791	0	0.29777	1.20522	-0.508563
00000003_9.tif	smeared	17.573	9.714	5.7554	4.89285	-0.862543	0	0.29777	1.45695	-0.25684
00000003_9.tif	smeared	17.792	9.776	5.7554	5.0708	-0.684596	0	0.29777	1.50993	-0.203852
00000003_9.tif	smeared	17.885	9.844	5.7554	5.13256	-0.622835	0	0.29777	1.52832	-0.185462
00000003_9.tif	smeared	18.042	9.781	5.7554	5.30171	-0.453691	0	0.29777	1.57869	-0.135096
00000003_9.tif	smeared	18.38	9.172	5.7554	5.8519	0.096498	1	0.29777	1.74252	0.0287342
00000003_9.tif	smeared	18.062	9.135	5.7554	5.58275	-0.172647	0	0.29777	1.66238	-0.0514092
00000003_9.tif	smeared	17.943	8.99	5.7554	5.54567	-0.209729	0	0.29777	1.65133	-0.062451
00000003_9.tif	smeared	16.156	8.406	5.7554	4.48032	-1.27508	0	0.29777	1.3341	-0.379681
00000003_9.tif	smeared	14.547	8.365	5.7554	3.61414	-2.14126	0	0.29777	1.07618	-0.637602
00000003_9.tif	smeared	15.536	8.083	5.7554	4.34382	-1.41158	0	0.29777	1.29346	-0.420327
00000003_9.tif	smeared	16.172	7.349	5.7554	5.30973	-0.445669	0	0.29777	1.58108	-0.132707
00000003_9.tif	smeared	16.635	8.349	5.7554	4.85968	-0.895722	0	0.29777	1.44707	-0.266719
00000003_9.tif	smeared	17.042	8.365	5.7554	5.15388	-0.60152	0	0.29777	1.53467	-0.179114
00000003_9.tif	smeared	17.125	8.516	5.7554	5.12344	-0.631958	0	0.29777	1.52561	-0.188178
00000003_9.tif	smeared	17.13	8.646	5.7554	5.0484	-0.706996	0	0.29777	1.50326	-0.210522
00000003_9.tif	smeared	18.51	7.521	5.7554	6.82774	1.07234	1	0.29777	2.0331	0.319312
00000003_9.tif	smeared	15.042	6.656	5.7554	5.38279	-0.372604	0	0.29777	1.60283	-0.11095
00000003_9.tif	smeared	15.318	6.443	5.7554	5.68427	-0.0711313	0	0.29777	1.6926	-0.0211808
00000003_9.tif	smeared	15.703	6.745	5.7554	5.57748	-0.177914	0	0.29777	1.66081	-0.0529774
00000003_9.tif	smeared	15.875	5.99	5.7554	6.32826	0.572866	1	0.29777	1.88437	0.170582
00000003_9.tif	smeared	15.49	5.609	5.7554	6.5211	0.765704	1	0.29777	1.94179	0.228004
00000003_9.tif	smeared	15.531	5.49	5.7554	6.64684	0.891443	1	0.29777	1.97923	0.265445
00000003_9.tif	smeared	15.771	7.234	5.7554	5.18546	-0.56994	0	0.29777	1.54407	-0.169711
00000003_9.tif	smeared	20.245	7.021	5.7554	8.53464	2.77925	1	0.29777	2.54136	0.827576
00000003_9.tif	smeared	20.318	7.068	5.7554	8.5706	2.81521	1	0.29777	2.55207	0.838284
00000003_9.tif	smeared	20.391	7.781	5.7554	8.274	2.5186	1	0.29777	2.46375	0.749964
00000003_9.tif	smeared	20.734	7.688	5.7554	8.62081	2.86541	1	0.29777	2.56702	0.853232
00000003_9.tif	smeared	21.281	7.88	5.7554	9.02708	3.27168	1	0.29777	2.68799	0.974208
00000003_9.tif	smeared	19.182	8.922	5.7554	6.68484	0.929447	1	0.29777	1.99055	0.276762
00000003_9.tif	smeared	19.568	8.729	5.7554	7.11609	1.36069	1	0.29777	2.11896	0.405172
00000003_9.tif	smeared	19.969	8.604	5.7554	7.53306	1.77766	1	0.29777	2.24312	0.529335
00000003_9.tif	smeared	19.729	9.573	5.7554	6.96386	1.20847	1	0.29777	2.07363	0.359845
00000003_9.tif	smeared	20.016	10.292	5.7554	7.06312	1.30773	1	0.29777	2.10319	0.389402
00000003_9.tif	smeared	20.177	10.427	5.7554	7.19651	1.44111	1	0.29777	2.14291	0.42912
00000003_9.tif	smeared	20.115	10.906	5.7554	7.06763	1.31224	1	0.29777	2.10453	0.390744
00000003_9.tif	smeared	19.318	10.786	5.7554	6.2917	0.536298	1	0.29777	1.87348	0.159694
00000003_9.tif	smeared	21.656	9.87	5.7554	8.75447	2.99907	1	0.29777	2.60682	0.893033
00000003_9.tif	smeared	20.521	12.156	5.7554	7.44774	1.69235	1	0.29777	2.21771	0.50393
00000003_9.tif	smeared	20.578	12.24	5.7554	7.51051	1.75511	1	0.29777	2.2364	0.52262
00000003_9.tif	smeared	20.453	12.286	5.7554	7.38955	1.63416	1	0.29777	2.20039	0.486602
00000003_9.tif	smeared	20.339	12.375	5.7554	7.284	1.52861	1	0.29777	2.16896	0.455173
00000003_9.tif	smeared	19.234	11.844	5.7554	6.14741	0.392009	1	0.29777	1.83051	0.116729
00000003_9.tif	smeared	19.042	13.057	5.7554	6.11199	0.356594	1	0.29777	1.81997	0.106183
00000003_9.tif	smeared	19.13	13	5.7554	6.18525	0.429848	1	0.29777	1.84178	0.127996
00000005_8.tif	smeared	6.229	4.99	4.94273	9.47719	4.53446	1	0.29777	2.82202	1.35023
00000005_8.tif	smeared	7.245	4.467	4.94273	9.22899	4.28626	1	0.29777	2.74812	1.27632
00000005_8.tif	smeared	5.198	7.214	4.94273	8.85766	3.91493	1	0.29777	2.63755	1.16575
00000005_8.tif	smeared	5.312	7.401	4.94273	8.66254	3.71981	1	0.29777	2.57944	1.10765
00000005_8.tif	smeared	4.339	8.76	4.94273	8.94464	4.0019	1	0.29777	2.66344	1.19165
00000005_8.tif	smeared	4.594	8.974	4.94273	8.63144	3.68871	1	0.29777	2.57018	1.09839
00000005_8.tif	smeared	4.505	9.109	4.94273	8.67081	3.72808	1	0.29777	2.58191	1.11011
00000005_8.tif	smeared	4.526	9.635	4.94273	8.49577	3.55304	1	0.29777	2.52979	1.05799
00000005_8.tif	smeared	4.219	10.047	4.94273	8.69496	3.75223	1	0.29777	2.5891	1.1173
00000005_8.tif	smeared	3.865	9.792	4.94273	9.09685	4.15412	1	0.29777	2.70877	1.23697
00000005_8.tif	smeared	4.141	11.964	4.94273	8.57323	3.6305	1	0.29777	2.55285	1.08105
00000005_8.tif	smeared	4.172	11.849	4.94273	8.54216	3.59943	1	0.29777	2.5436	1.0718
00000005_8.tif	smeared	4.354	11.839	4.94273	8.36023	3.4175	1	0.29777	2.48943	1.01763
00000005_8.tif	smeared	4.365	11.979	4.94273	8.34936	3.40663	1	0.29777	2.48619	1.01439
00000005_8.tif	smeared	4.568	12.01	4.94273	8.14673	3.204	1	0.29777	2.42585	0.954054
00000005_8.tif	smeared	4.927	11.745	4.94273	7.78856	2.84583	1	0.29777	2.3192	0.847403
00000005_8.tif	smeared	5.135	11.74	4.94273	7.58071	2.63798	1	0.29777	2.25731	0.785511
00000005_8.tif	smeared	5.839	12.099	4.94273	6.87785	1.93512	1	0.29777	2.04802	0.57622
00000005_8.tif	smeared	5.885	12.214	4.94273	6.83617	1.89344	1	0.29777	2.03561	0.563809
00000005_8.tif	smeared	4.271	12.984	4.94273	8.51218	3.56944	1	0.29777	2.53467	1.06287
00000005_8.tif	smeared	4.167	13.208	4.94273	8.64636	3.70362	1	0.29777	2.57463	1.10283
00000005_8.tif	smeared	4.203	13.401	4.94273	8.64217	3.69944	1	0.29777	2.57338	1.10158
00000005_8.tif	smeared	4.531	14.427	4.94273	8.564	3.62127	1	0.29777	2.5501	1.07831
00000005_8.tif	smeared	4.604	14.521	4.94273	8.5227	3.57997	1	0.29777	2.53781	1.06601
00000005_8.tif	smeared	5.599	14.49	4.94273	7.5714	2.62867	1	0.29777	2.25454	0.782739
00000005_8.tif	smeared	5.917	15.354	4.94273	7.62381	2.68107	1	0.29777	2.27014	0.798343
00000005_8.tif	smeared	6.026	15.604	4.94273	7.64471	2.70198	1	0.29777	2.27636	0.804567
00000005_8.tif	smeared	6.104	14.599	4.94273	7.13942	2.19669	1	0.29777	2.1259	0.654107
00000005_8.tif	smeared	6.068	14.49	4.94273	7.13248	2.18975	1	0.29777	2.12384	0.65204
00000005_8.tif	smeared	6.891	15.156	4.94273	6.67101	1.72828	1	0.29777	1.98643	0.514629
00000005_8.tif	smeared	7.828	16.073	4.94273	6.42484	1.48211	1	0.29777	1.91312	0.441327
00000005_8.tif	smeared	8.865	15.594	4.94273	5.33414	0.391408	1	0.29777	1.58835	0.116549
00000005_8.tif	smeared	6.281	13.844	4.94273	6.72003	1.77729	1	0.29777	2.00102	0.529225
00000005_8.tif	smeared	6.495	13.922	4.94273	6.53914	1.59641	1	0.29777	1.94716	0.475363
00000005_8.tif	smeared	7.172	14.359	4.94273	6.06263	1.1199	1	0.29777	1.80527	0.333473
00000005_8.tif	smeared	7.693	14.578	4.94273	5.69006	0.747327	1	0.29777	1.69433	0.222531
00000005_8.tif	smeared	7.828	14.516	4.94273	5.54177	0.599038	1	0.29777	1.65017	0.178376
00000005_8.tif	smeared	8.073	14.182	4.94273	5.17125	0.228519	1	0.29777	1.53984	0.0680462
00000005_8.tif	smeared	8.495	14.625	4.94273	5.02197	0.0792332	1	0.29777	1.49539	0.0235933
00000005_8.tif	smeared	8.625	14.542	4.94273	4.86773	-0.0750016	0	0.29777	1.44946	-0.0223332
00000005_8.tif	smeared	8.823	14.193	4.94273	4.51588	-0.426855	0	0.29777	1.34469	-0.127105
00000005_8.tif	smeared	7.385	13.51	4.94273	5.56661	0.623876	1	0.29777	1.65757	0.185771
00000005_8.tif	smeared	5.802	12.943	4.94273	6.9901	2.04737	1	0.29777	2.08144	0.609645
00000005_8.tif	smeared	5.859	12.865	4.94273	6.92245	1.97972	1	0.29777	2.0613	0.589501
00000005_8.tif	smeared	5.901	12.984	4.94273	6.89854	1.95581	1	0.29777	2.05418	0.582381
00000005_8.tif	smeared	6.266	13.031	4.94273	6.54627	1.60353	1	0.29777	1.94928	0.477484
00000005_8.tif	smeared	6.349	13.307	4.94273	6.51844	1.57571	1	0.29777	1.941	0.469199
00000005_8.tif	smeared	6.37	13.417	4.94273	6.52262	1.57989	1	0.29777	1.94224	0.470444
00000005_8.tif	smeared	6.479	13.276	4.94273	6.38481	1.44208	1	0.29777	1.90121	0.429409
00000005_8.tif	smeared	6.812	12.375	4.94273	5.921	0.978271	1	0.29777	1.7631	0.2913
00000005_8.tif	smeared	6.823	12.688	4.94273	5.94334	1.0006	1	0.29777	1.76975	0.29795
00000005_8.tif	smeared	6.906	12.76	4.94273	5.87118	0.928447	1	0.29777	1.74826	0.276464
00000005_8.tif	smeared	5.932	11.734	4.94273	6.78406	1.84132	1	0.29777	2.02009	0.548291
00000005_8.tif	smeared	7.359	12.401	4.94273	5.37829	0.43556	1	0.29777	1.60149	0.129697
00000005_8.tif	smeared	6.562	10.76	4.94273	6.25691	1.31418	1	0.29777	1.86312	0.391324
00000005_8.tif	smeared	6.562	10.599	4.94273	6.28827	1.34554	1	0.29777	1.87246	0.40066
00000005_8.tif	smeared	6.693	10.578	4.94273	6.16464	1.22191	1	0.29777	1.83564	0.363847
00000005_8.tif	smeared	6.708	10.734	4.94273	6.11833	1.17559	1	0.29777	1.82185	0.350057
00000005_8.tif	smeared	8.964	12.188	4.94273	3.76097	-1.18177	0	0.29777	1.1199	-0.351894
00000005_8.tif	smeared	8.984	11.068	4.94273	3.82188	-1.12085	0	0.29777	1.13804	-0.333755
00000005_8.tif	smeared	8.875	10.984	4.94273	3.947	-0.995732	0	0.29777	1.1753	-0.296499
00000005_8.tif	smeared	8.734	10.953	4.94273	4.09135	-0.851387	0	0.29777	1.21828	-0.253518
00000005_8.tif	smeared	8.932	10.823	4.94273	3.93263	-1.0101	0	0.29777	1.17102	-0.300777
00000005_8.tif	smeared	8.849	10.76	4.94273	4.0299	-0.912831	0	0.29777	1.19998	-0.271814
00000005_8.tif	smeared	8.797	10.688	4.94273	4.10052	-0.842213	0	0.29777	1.22101	-0.250786
00000005_8.tif	smeared	9.13	10.917	4.94273	3.71663	-1.22611	0	0.29777	1.1067	-0.365098
00000005_8.tif	smeared	9.125	10.479	4.94273	3.86044	-1.08229	0	0.29777	1.14952	-0.322274
00000005_8.tif	smeared	9.083	10.365	4.94273	3.94252	-1.00021	0	0.29777	1.17396	-0.297833
00000005_8.tif	smeared	8.719	9.891	4.94273	4.47215	-0.470582	0	0.29777	1.33167	-0.140125
00000005_8.tif	smeared	8.792	9.833	4.94273	4.43381	-0.508918	0	0.29777	1.32026	-0.151541
00000005_8.tif	smeared	7.411	9.312	4.94273	5.90125	0.958516	1	0.29777	1.75721	0.285417
00000005_8.tif	smeared	9.339	9.417	4.94273	4.19057	-0.752162	0	0.29777	1.24783	-0.223971
00000005_8.tif	smeared	9.172	9.052	4.94273	4.54561	-0.397123	0	0.29777	1.35355	-0.118251
00000005_8.tif	smeared	8.849	8.151	4.94273	5.38523	0.4425	1	0.29777	1.60356	0.131763
00000005_8.tif	smeared	8.823	8.031	4.94273	5.48788	0.545144	1	0.29777	1.63412	0.162327
00000005_8.tif	smeared	8.688	4.839	4.94273	8.12899	3.18626	1	0.29777	2.42057	0.948773
00000005_8.tif	smeared	8.234	3.682	4.94273	9.36068	4.41795	1	0.29777	2.78733	1.31553
00000005_8.tif	smeared	8.073	3.703	4.94273	9.42051	4.47778	1	0.29777	2.80515	1.33335
00000005_8.tif	smeared	8.073	3.635	4.94273	9.47975	4.53702	1	0.29777	2.82278	1.35099
00000005_8.tif	smeared	9.906	5.177	4.94273	7.28677	2.34404	1	0.29777	2.16978	0.697985
00000005_8.tif	smeared	9.719	5.495	4.94273	7.07155	2.12882	1	0.29777	2.1057	0.633899
00000005_8.tif	smeared	9.521	5.729	4.94273	6.94902	2.00628	1	0.29777	2.06921	0.597411
00000005_8.tif	smeared	9.599	5.964	4.94273	6.70457	1.76183	1	0.29777	1.99642	0.524621
00000005_8.tif	smeared	9.979	6.427	4.94273	6.11922	1.17649	1	0.29777	1.82212	0.350324
00000005_8.tif	smeared	10.943	4.531	4.94273	7.5798	2.63707	1	0.29777	2.25704	0.785239
00000005_8.tif	smeared	11.276	4.839	4.94273	7.20692	2.26419	1	0.29777	2.146	0.674207
00000005_8.tif	smeared	12.078	4.219	4.94273	7.70828	2.76555	1	0.29777	2.2953	0.823498
00000005_8.tif	smeared	12.484	3.156	4.94273	8.74802	3.80529	1	0.29777	2.6049	1.1331
00000005_8.tif	smeared	12.552	3.01	4.94273	8.89248	3.94974	1	0.29777	2.64791	1.17612
00000005_8.tif	smeared	12.99	2.953	4.94273	8.95226	4.00952	1	0.29777	2.66571	1.19392
00000005_8.tif	smeared	11.964	5.734	4.94273	6.21244	1.26971	1	0.29777	1.84988	0.37808
00000005_8.tif	smeared	12.099	5.812	4.94273	6.11998	1.17725	1	0.29777	1.82235	0.350549
00000005_8.tif	smeared	12.13	6.01	4.94273	5.91988	0.977144	1	0.29777	1.76276	0.290964
00000005_8.tif	smeared	12.219	5.948	4.94273	5.97354	1.03081	1	0.29777	1.77874	0.306945
00000005_8.tif	smeared	12.417	6.073	4.94273	5.83556	0.892831	1	0.29777	1.73766	0.265858
00000005_8.tif	smeared	11.76	7.021	4.94273	4.97238	0.029643	1	0.29777	1.48062	0.00882681
00000005_8.tif	smeared	12.193	7.672	4.94273	4.26097	-0.68176	0	0.29777	1.26879	-0.203008
00000005_8.tif	smeared	12.286	7.797	4.94273	4.12626	-0.816475	0	0.29777	1.22868	-0.243122
00000005_8.tif	smeared	12.781	6.688	4.94273	5.21343	0.270698	1	0.29777	1.5524	0.0806058
00000005_8.tif	smeared	12.911	6.875	4.94273	5.02986	0.0871271	1	0.29777	1.49774	0.0259438
00000005_8.tif	smeared	13.047	7.115	4.94273	4.79757	-0.145162	0	0.29777	1.42857	-0.0432247
00000005_8.tif	smeared	13.161	7.104	4.94273	4.81778	-0.124951	0	0.29777	1.43459	-0.0372066
00000005_8.tif	smeared	13.245	6.865	4.94273	5.06392	0.121185	1	0.29777	1.50788	0.0360852
00000005_8.tif	smeared	13.38	6.854	4.94273	5.09075	0.148021	1	0.29777	1.51587	0.0440761
00000005_8.tif	smeared	13.188	7.719	4.94273	4.20878	-0.733956	0	0.29777	1.25325	-0.21855
00000005_8.tif	smeared	9.729	8.599	4.94273	4.45123	-0.491504	0	0.29777	1.32544	-0.146355
00000005_8.tif	smeared	10.531	8.755	4.94273	3.8292	-1.11353	0	0.29777	1.14022	-0.331575
00000005_8.tif	smeared	10.568	8.849	4.94273	3.73095	-1.21178	0	0.29777	1.11097	-0.360831
00000005_8.tif	smeared	10.76	9.021	4.94273	3.4803	-1.46243	0	0.29777	1.03633	-0.435467
00000005_8.tif	smeared	9.453	10.12	4.94273	3.71565	-1.22708	0	0.29777	1.10641	-0.365387
00000005_8.tif	smeared	9.531	9.505	4.94273	3.98401	-0.958726	0	0.29777	1.18632	-0.28548
00000005_8.tif	smeared	9.771	9.839	4.94273	3.59348	-1.34925	0	0.29777	1.07003	-0.401767
00000005_8.tif	smeared	9.859	9.667	4.94273	3.62516	-1.31757	0	0.29777	1.07946	-0.392334
00000005_8.tif	smeared	10.484	9.5	4.94273	3.27684	-1.66589	0	0.29777	0.975746	-0.496052
00000005_8.tif	smeared	10.708	9.297	4.94273	3.28707	-1.65566	0	0.29777	0.978792	-0.493006
00000005_8.tif	smeared	10.052	10.167	4.94273	3.17695	-1.76578	0	0.29777	0.946	-0.525798
00000005_8.tif	smeared	9.995	10.62	4.94273	3.00565	-1.93708	0	0.29777	0.894992	-0.576805
00000005_8.tif	smeared	9.63	10.708	4.94273	3.30671	-1.63603	0	0.29777	0.984638	-0.48716
00000005_8.tif	smeared	10.339	10.245	4.94273	2.89533	-2.0474	0	0.29777	0.862144	-0.609654
00000005_8.tif	smeared	10.922	10.036	4.94273	2.5864	-2.35633	0	0.29777	0.770154	-0.701644
00000005_8.tif	smeared	11.516	10.276	4.94273	2.01887	-2.92386	0	0.29777	0.601158	-0.870639
00000005_8.tif	smeared	11.672	10.724	4.94273	1.57197	-3.37076	0	0.29777	0.468086	-1.00371
00000005_8.tif	smeared	12.401	10.203	4.94273	1.72661	-3.21612	0	0.29777	0.514132	-0.957666
00000005_8.tif	smeared	12.401	10.068	4.94273	1.85953	-3.0832	0	0.29777	0.553713	-0.918085
00000005_8.tif	smeared	13.115	9.328	4.94273	2.60406	-2.33867	0	0.29777	0.775411	-0.696386
00000005_8.tif	smeared	13.156	9.229	4.94273	2.70831	-2.23442	0	0.29777	0.806454	-0.665344
00000005_8.tif	smeared	13.307	9.594	4.94273	2.38199	-2.56074	0	0.29777	0.709287	-0.762511
00000005_8.tif	smeared	13.422	9.901	4.94273	2.12162	-2.82111	0	0.29777	0.631754	-0.840043
00000005_8.tif	smeared	13.13	10.807	4.94273	1.17042	-3.77231	0	0.29777	0.348517	-1.12328
00000005_8.tif	smeared	11.432	11.927	4.94273	1.28226	-3.66047	0	0.29777	0.38182	-1.08998
00000005_8.tif	smeared	12.302	12.208	4.94273	0.513802	-4.42893	0	0.29777	0.152995	-1.3188
00000005_8.tif	smeared	9.375	13.188	4.94273	3.57845	-1.36428	0	0.29777	1.06555	-0.406243
00000005_8.tif	smeared	10.099	13	4.94273	2.83655	-2.10618	0	0.29777	0.84464	-0.627157
00000005_8.tif	smeared	10.307	13.109	4.94273	2.69312	-2.24961	0	0.29777	0.801931	-0.669866
00000005_8.tif	smeared	10.474	14.214	4.94273	3.21987	-1.72286	0	0.29777	0.958781	-0.513016
00000005_8.tif	smeared	10.391	14.359	4.94273	3.38202	-1.56071	0	0.29777	1.00707	-0.464732
00000005_8.tif	smeared	10.828	14.026	4.94273	2.84124	-2.1015	0	0.29777	0.846035	-0.625763
00000005_8.tif	smeared	10.917	14.172	4.94273	2.89597	-2.04676	0	0.29777	0.862333	-0.609464
00000005_8.tif	smeared	11.036	14.156	4.94273	2.81082	-2.13191	0	0.29777	0.836978	-0.63482
00000005_8.tif	smeared	12.422	14.167	4.94273	2.28474	-2.658	0	0.29777	0.680326	-0.791471
00000005_8.tif	smeared	12.458	13.948	4.94273	2.06295	-2.87979	0	0.29777	0.614283	-0.857514
00000005_8.tif	smeared	12.74	13.177	4.94273	1.27626	-3.66647	0	0.29777	0.380033	-1.09176
00000005_8.tif	smeared	12.849	13.104	4.94273	1.21055	-3.73218	0	0.29777	0.360466	-1.11133
00000005_8.tif	smeared	12.896	12.917	4.94273	1.03217	-3.91056	0	0.29777	0.30735	-1.16445
00000005_8.tif	smeared	11.135	14.724	4.94273	3.23459	-1.70814	0	0.29777	0.963164	-0.508634
00000005_8.tif	smeared	11.25	15.203	4.94273	3.61199	-1.33074	0	0.29777	1.07554	-0.396254
00000005_8.tif	smeared	12.932	14.714	4.94273	2.82143	-2.1213	0	0.29777	0.840139	-0.631659
00000005_8.tif	smeared	9.547	16.417	4.94273	5.51581	0.573076	1	0.29777	1.64244	0.170645
00000005_8.tif	smeared	9.615	16.464	4.94273	5.51587	0.573133	1	0.29777	1.64246	0.170662
00000005_8.tif	smeared	11.922	15.688	4.94273	3.86893	-1.0738	0	0.29777	1.15205	-0.319746
00000005_8.tif	smeared	11.995	15.661	4.94273	3.82813	-1.1146	0	0.29777	1.1399	-0.331896
00000005_8.tif	smeared	12.432	16.104	4.94273	4.21245	-0.730282	0	0.29777	1.25434	-0.217456
00000005_8.tif	smeared	12.667	16.307	4.94273	4.40625	-0.536482	0	0.29777	1.31205	-0.159748
00000005_8.tif	smeared	13.094	16.307	4.94273	4.42236	-0.520376	0	0.29777	1.31685	-0.154952
00000005_8.tif	smeared	13.406	16.38	4.94273	4.53214	-0.410591	0	0.29777	1.34954	-0.122262
00000005_8.tif	smeared	14.703	20.677	4.94273	8.99857	4.05584	1	0.29777	2.6795	1.20771
00000005_8.tif	smeared	15.214	20.552	4.94273	9.00499	4.06226	1	0.29777	2.68142	1.20962
00000005_8.tif	smeared	14.693	20.198	4.94273	8.52975	3.58702	1	0.29777	2.5399	1.06811
00000005_8.tif	smeared	14.729	20.161	4.94273	8.50222	3.55949	1	0.29777	2.53171	1.05991
00000005_8.tif	smeared	13.604	17.453	4.94273	5.62288	0.68015	1	0.29777	1.67433	0.202528
00000005_8.tif	smeared	14.266	17.599	4.94273	5.90558	0.962851	1	0.29777	1.75851	0.286708
00000005_8.tif	smeared	13.521	16.182	4.94273	4.3564	-0.586334	0	0.29777	1.2972	-0.174593
00000005_8.tif	smeared	13.703	16.167	4.94273	4.37914	-0.563591	0	0.29777	1.30398	-0.167821
00000005_8.tif	smeared	13.771	16.021	4.94273	4.25343	-0.689304	0	0.29777	1.26654	-0.205254
00000005_8.tif	smeared	14.073	15.589	4.94273	3.93042	-1.01231	0	0.29777	1.17036	-0.301435
00000005_8.tif	smeared	14.76	15.969	4.94273	4.55354	-0.389191	0	0.29777	1.35591	-0.115889
00000005_8.tif	smeared	15.375	16.823	4.94273	5.59527	0.652534	1	0.29777	1.6661	0.194305
00000005_8.tif	smeared	15.432	17.047	4.94273	5.81969	0.876962	1	0.29777	1.73293	0.261133
00000005_8.tif	smeared	15.328	17.104	4.94273	5.82273	0.879999	1	0.29777	1.73383	0.262037
00000005_8.tif	smeared	17.479	17.135	4.94273	7.07813	2.1354	1	0.29777	2.10766	0.635859
00000005_8.tif	smeared	17.422	16.969	4.94273	6.91736	1.97463	1	0.29777	2.05978	0.587985
00000005_8.tif	smeared	14.74	15.182	4.94273	3.85612	-1.08662	0	0.29777	1.14824	-0.323561
00000005_8.tif	smeared	15.255	14.875	4.94273	3.91169	-1.03104	0	0.29777	1.16479	-0.307012
00000005_8.tif	smeared	15.01	13.927	4.94273	3.06207	-1.88066	0	0.29777	0.911794	-0.560004
00000005_8.tif	smeared	16.656	14.964	4.94273	4.99213	0.0493949	1	0.29777	1.48651	0.0147083
00000005_8.tif	smeared	17.01	14.969	4.94273	5.27904	0.336306	1	0.29777	1.57194	0.100142
00000005_8.tif	smeared	18	15.474	4.94273	6.38029	1.43756	1	0.29777	1.89986	0.428062
00000005_8.tif	smeared	17.708	14.859	4.94273	5.80429	0.861559	1	0.29777	1.72834	0.256547
00000005_8.tif	smeared	16.297	13.599	4.94273	3.96498	-0.977749	0	0.29777	1.18065	-0.291144
00000005_8.tif	smeared	16.448	13.599	4.94273	4.10195	-0.840786	0	0.29777	1.22144	-0.250361
00000005_8.tif	smeared	16.401	13.495	4.94273	4.01682	-0.925917	0	0.29777	1.19609	-0.27571
00000005_8.tif	smeared	17.724	13.854	4.94273	5.3772	0.43447	1	0.29777	1.60117	0.129372
00000005_8.tif	smeared	17.604	13.531	4.94273	5.15451	0.21178	1	0.29777	1.53486	0.0630618
00000005_8.tif	smeared	13.573	12.167	4.94273	0.899242	-4.04349	0	0.29777	0.267767	-1.20403
00000005_8.tif	smeared	13.479	12.042	4.94273	0.777886	-4.16485	0	0.29777	0.231631	-1.24017
00000005_8.tif	smeared	13.589	10.828	4.94273	1.38454	-3.55819	0	0.29777	0.412275	-1.05952
00000005_8.tif	smeared	13.656	10.812	4.94273	1.43989	-3.50284	0	0.29777	0.428756	-1.04304
00000005_8.tif	smeared	14.339	11.115	4.94273	1.80511	-3.13762	0	0.29777	0.537508	-0.93429
00000005_8.tif	smeared	14.495	11.146	4.94273	1.93442	-3.00831	0	0.29777	0.576013	-0.895785
00000005_8.tif	smeared	16.51	11.74	4.94273	3.79941	-1.14332	0	0.29777	1.13135	-0.340446
00000005_8.tif	smeared	16.958	11.948	4.94273	4.24426	-0.698472	0	0.29777	1.26381	-0.207984
00000005_8.tif	smeared	17.208	12.182	4.94273	4.50278	-0.439956	0	0.29777	1.34079	-0.131006
00000005_8.tif	smeared	17.443	12	4.94273	4.73004	-0.212696	0	0.29777	1.40846	-0.0633345
00000005_8.tif	smeared	17.38	11.839	4.94273	4.66641	-0.27632	0	0.29777	1.38952	-0.0822799
00000005_8.tif	smeared	17.443	11.531	4.94273	4.74345	-0.19928	0	0.29777	1.41246	-0.0593395
00000005_8.tif	smeared	14	9.354	4.94273	2.85324	-2.08949	0	0.29777	0.849611	-0.622187
00000005_8.tif	smeared	14.224	9.26	4.94273	3.0422	-1.90053	0	0.29777	0.905876	-0.565921
00000005_8.tif	smeared	14.37	9.224	4.94273	3.1478	-1.79493	0	0.29777	0.937321	-0.534476
00000005_8.tif	smeared	14.333	8.812	4.94273	3.48756	-1.45517	0	0.29777	1.03849	-0.433306
00000005_8.tif	smeared	15.427	9.182	4.94273	3.84101	-1.10173	0	0.29777	1.14374	-0.328061
00000005_8.tif	smeared	16.24	10.312	4.94273	3.86751	-1.07523	0	0.29777	1.15163	-0.32017
00000005_8.tif	smeared	16.719	10.417	4.94273	4.2711	-0.671634	0	0.29777	1.2718	-0.199992
00000005_8.tif	smeared	16.578	9.714	4.94273	4.43998	-0.502747	0	0.29777	1.32209	-0.149703
00000005_8.tif	smeared	16.651	9.656	4.94273	4.53211	-0.410625	0	0.29777	1.34953	-0.122272
00000005_8.tif	smeared	13.812	8.255	4.94273	3.80774	-1.13499	0	0.29777	1.13383	-0.337965
00000005_8.tif	smeared	14.146	8.031	4.94273	4.12644	-0.81629	0	0.29777	1.22873	-0.243067
00000005_8.tif	smeared	14.479	8.109	4.94273	4.18264	-0.760091	0	0.29777	1.24547	-0.226332
00000005_8.tif	smeared	14.615	8.427	4.94273	3.96011	-0.982622	0	0.29777	1.1792	-0.292595
00000005_8.tif	smeared	15.927	8.323	4.94273	4.80889	-0.133839	0	0.29777	1.43194	-0.0398533
00000005_8.tif	smeared	16.396	8.396	4.94273	5.08352	0.140785	1	0.29777	1.51372	0.0419216
00000005_8.tif	smeared	17.214	9.057	4.94273	5.32338	0.380644	1	0.29777	1.58514	0.113344
00000005_8.tif	smeared	17.812	8.505	4.94273	6.12555	1.18282	1	0.29777	1.82401	0.352209
00000005_8.tif	smeared	17.427	8.443	4.94273	5.84552	0.90279	1	0.29777	1.74062	0.268824
00000005_8.tif	smeared	17.188	7.708	4.94273	6.13171	1.18898	1	0.29777	1.82584	0.354043
00000005_8.tif	smeared	17.641	7.547	4.94273	6.57515	1.63242	1	0.29777	1.95788	0.486086
00000005_8.tif	smeared	13.521	6.911	4.94273	5.05483	0.112102	1	0.29777	1.50518	0.0333806
00000005_8.tif	smeared	18.13	6.823	4.94273	7.42423	2.48149	1	0.29777	2.21071	0.738915
00000005_8.tif	smeared	18.203	7.083	4.94273	7.30358	2.36085	1	0.29777	2.17479	0.702989
00000005_8.tif	smeared	18.448	8.188	4.94273	6.83119	1.88846	1	0.29777	2.03412	0.562325
00000005_8.tif	smeared	18.703	8.021	4.94273	7.136	2.19327	1	0.29777	2.12489	0.65309
00000005_8.tif	smeared	19.557	8.281	4.94273	7.74151	2.79878	1	0.29777	2.30519	0.833393
00000005_8.tif	smeared	19.766	8.073	4.94273	8.02398	3.08125	1	0.29777	2.3893	0.917504
00000005_8.tif	smeared	19.521	7.547	4.94273	8.08038	3.13765	1	0.29777	2.4061	0.934298
00000005_8.tif	smeared	20.188	7.667	4.94273	8.58996	3.64723	1	0.29777	2.55783	1.08604
00000005_8.tif	smeared	20.391	7.5	4.94273	8.84902	3.90629	1	0.29777	2.63497	1.16317
00000005_8.tif	smeared	19.656	9.599	4.94273	7.31372	2.37099	1	0.29777	2.17781	0.70601
00000005_8.tif	smeared	18.786	12.25	4.94273	6.08202	1.13929	1	0.29777	1.81104	0.339246
00000005_8.tif	smeared	19.115	12.583	4.94273	6.43723	1.4945	1	0.29777	1.91681	0.445016
00000005_8.tif	smeared	19.292	12.672	4.94273	6.62303	1.6803	1	0.29777	1.97214	0.500342
00000005_8.tif	smeared	18.13	14.427	4.94273	5.9761	1.03336	1	0.29777	1.7795	0.307705
00000005_8.tif	smeared	18.198	15.286	4.94273	6.44457	1.50184	1	0.29777	1.919	0.447202
00000005_8.tif	smeared	20.651	15.599	4.94273	8.75621	3.81348	1	0.29777	2.60734	1.13554
00000005_8.tif	smeared	18.344	16.901	4.94273	7.52973	2.587	1	0.29777	2.24213	0.770332
00000005_8.tif	smeared	18.448	16.948	4.94273	7.63878	2.69605	1	0.29777	2.2746	0.802802
00000005_8.tif	smeared	18.542	17.193	4.94273	7.87216	2.92942	1	0.29777	2.34409	0.872295
00000005_8.tif	smeared	18.651	17.484	4.94273	8.14972	3.20698	1	0.29777	2.42674	0.954943
00000005_8.tif	smeared	18.833	17.531	4.94273	8.31499	3.37226	1	0.29777	2.47595	1.00416
00000005_8.tif	smeared	19.266	17.375	4.94273	8.53776	3.59503	1	0.29777	2.54229	1.07049
00000005_8.tif	smeared	22.363	10.88	4.94273	9.70287	4.76014	1	0.29777	2.88922	1.41743
00000005_8.tif	smeared	22.724	10.589	4.94273	10.0956	5.15288	1	0.29777	3.00617	1.53437
00000008_4.tif	predator	7.458	6.135	5.41143	9.65691	4.24548	1	0.29777	2.87554	1.26418
00000008_4.tif	predator	7.564	6.561	5.41143	9.35582	3.94439	1	0.29777	2.78588	1.17452
00000008_4.tif	predator	7.911	5.102	5.41143	9.8506	4.43918	1	0.29777	2.93321	1.32185
00000008_4.tif	predator	7.842	5.227	5.41143	9.83195	4.42053	1	0.29777	2.92766	1.3163
00000008_4.tif	predator	6.467	11.148	5.41143	9.3311	3.91967	1	0.29777	2.77852	1.16716
00000008_4.tif	predator	5.543	11.814	5.41143	10.2859	4.87444	1	0.29777	3.06282	1.45146
00000008_4.tif	predator	5.78	11.807	5.41143	10.0491	4.63763	1	0.29777	2.99231	1.38095
00000008_4.tif	predator	7.356	12.651	5.41143	8.59999	3.18856	1	0.29777	2.56082	0.949458
00000008_4.tif	predator	7.252	13.693	5.41143	8.95781	3.54638	1	0.29777	2.66737	1.05601
00000008_4.tif	predator	7.064	14.123	5.41143	9.27293	3.8615	1	0.29777	2.7612	1.14984
00000008_4.tif	predator	5.78	15.432	5.41143	10.9516	5.54022	1	0.29777	3.26107	1.64971
00000008_4.tif	predator	7.266	18.724	5.41143	11.5048	6.09339	1	0.29777	3.42579	1.81443
00000008_4.tif	predator	10.241	20.932	5.41143	11.376	5.96462	1	0.29777	3.38745	1.77608
00000008_4.tif	predator	8.998	18.155	5.41143	9.86655	4.45513	1	0.29777	2.93796	1.3266
00000008_4.tif	predator	9.901	19.203	5.41143	10.098	4.68659	1	0.29777	3.00689	1.39553
00000008_4.tif	predator	9.943	19.161	5.41143	10.0394	4.62798	1	0.29777	2.98943	1.37807
00000008_4.tif	predator	10.658	19.543	5.41143	9.96528	4.55385	1	0.29777	2.96736	1.356
00000008_4.tif	predator	11.464	20.224	5.41143	10.1865	4.77508	1	0.29777	3.03324	1.42187
00000008_4.tif	predator	13.075	20.932	5.41143	10.2934	4.882	1	0.29777	3.06507	1.45371
00000008_4.tif	predator	12.901	20.842	5.41143	10.2544	4.843	1	0.29777	3.05346	1.4421
00000008_4.tif	predator	14.387	20.238	5.41143	9.34004	3.92861	1	0.29777	2.78118	1.16982
00000008_4.tif	predator	14.04	20.182	5.41143	9.34368	3.93225	1	0.29777	2.78227	1.17091
00000008_4.tif	predator	13.797	19.78	5.41143	9.00003	3.58861	1	0.29777	2.67994	1.06858
00000008_4.tif	predator	13.693	19.689	5.41143	8.93525	3.52382	1	0.29777	2.66065	1.04929
00000008_4.tif	predator	13.693	19.557	5.41143	8.80702	3.39559	1	0.29777	2.62246	1.0111
00000008_4.tif	predator	11.234	17.314	5.41143	7.78617	2.37474	1	0.29777	2.31849	0.707127
00000008_4.tif	predator	13.693	16.089	5.41143	5.50217	0.0907416	1	0.29777	1.63838	0.0270201
00000008_4.tif	predator	14.019	16.255	5.41143	5.5429	0.131476	1	0.29777	1.65051	0.0391495
00000008_4.tif	predator	14.109	16.318	5.41143	5.5747	0.163275	1	0.29777	1.65998	0.0486183
00000008_4.tif	predator	13.943	16.408	5.41143	5.71224	0.300815	1	0.29777	1.70093	0.0895738
00000008_4.tif	predator	9.054	15.672	5.41143	8.20054	2.78912	1	0.29777	2.44188	0.830515
00000008_4.tif	predator	11.7	14.394	5.41143	5.31702	-0.0944055	0	0.29777	1.58325	-0.0281111
00000008_4.tif	predator	9.811	12.384	5.41143	6.14279	0.731359	1	0.29777	1.82914	0.217777
00000008_4.tif	predator	13.359	11.849	5.41143	2.57996	-2.83147	0	0.29777	0.768234	-0.843127
00000008_4.tif	predator	13.359	11.745	5.41143	2.54783	-2.8636	0	0.29777	0.758668	-0.852693
00000008_4.tif	predator	14.436	10.134	5.41143	1.61585	-3.79558	0	0.29777	0.481151	-1.13021
00000008_4.tif	predator	11.97	9.172	5.41143	4.24333	-1.1681	0	0.29777	1.26354	-0.347826
00000008_4.tif	predator	8.602	8.273	5.41143	7.69622	2.28479	1	0.29777	2.2917	0.680343
00000008_4.tif	predator	12.45	7.627	5.41143	4.75534	-0.656085	0	0.29777	1.416	-0.195362
00000008_4.tif	predator	10.38	5.977	5.41143	7.39085	1.97942	1	0.29777	2.20077	0.589413
00000008_4.tif	predator	8.63	5.832	5.41143	8.83888	3.42745	1	0.29777	2.63195	1.02059
00000008_4.tif	predator	11.443	2.839	5.41143	9.25424	3.84281	1	0.29777	2.75563	1.14427
00000008_4.tif	predator	13.373	2.568	5.41143	8.77831	3.36688	1	0.29777	2.61392	1.00256
00000008_4.tif	predator	17.814	3.745	5.41143	7.53498	2.12355	1	0.29777	2.24369	0.632329
00000008_4.tif	predator	17.793	3.87	5.41143	7.40893	1.9975	1	0.29777	2.20616	0.594796
00000008_4.tif	predator	19.405	4.516	5.41143	7.42461	2.01318	1	0.29777	2.21083	0.599464
00000008_4.tif	predator	18.543	7.057	5.41143	4.80908	-0.602351	0	0.29777	1.432	-0.179362
00000008_4.tif	predator	19.759	7.814	5.41143	5.08723	-0.324197	0	0.29777	1.51482	-0.096536
00000008_4.tif	predator	19.863	7.689	5.41143	5.24673	-0.164695	0	0.29777	1.56232	-0.0490411
00000008_4.tif	predator	19.939	7.793	5.41143	5.24148	-0.169949	0	0.29777	1.56076	-0.0506056
00000008_4.tif	predator	20.071	7.474	5.41143	5.54392	0.132491	1	0.29777	1.65081	0.0394518
00000008_4.tif	predator	18.46	13.332	5.41143	3.53645	-1.87498	0	0.29777	1.05305	-0.558311
00000008_4.tif	predator	17.918	14.464	5.41143	4.0575	-1.35393	0	0.29777	1.2082	-0.403159
00000008_4.tif	predator	18.196	14.714	5.41143	4.41723	-0.994203	0	0.29777	1.31532	-0.296044
00000008_4.tif	predator	18.28	14.575	5.41143	4.34858	-1.06284	0	0.29777	1.29488	-0.316483
00000008_4.tif	predator	18.474	14.005	5.41143	4.02074	-1.39069	0	0.29777	1.19725	-0.414106
00000008_4.tif	predator	18.786	14.783	5.41143	4.81741	-0.594022	0	0.29777	1.43448	-0.176882
00000008_4.tif	predator	20.03	14.554	5.41143	5.52392	0.112492	1	0.29777	1.64486	0.0334966
00000008_4.tif	predator	15.134	16.165	5.41143	5.20242	-0.209009	0	0.29777	1.54912	-0.0622365
00000008_4.tif	predator	15.418	16.727	5.41143	5.73454	0.32311	1	0.29777	1.70757	0.0962124
00000008_4.tif	predator	15.564	16.804	5.41143	5.80368	0.392251	1	0.29777	1.72816	0.116801
00000008_4.tif	predator	16.696	15.575	5.41143	4.65759	-0.753843	0	0.29777	1.38689	-0.224472
00000008_4.tif	predator	16.439	17.158	5.41143	6.1864	0.774974	1	0.29777	1.84213	0.230764
00000008_4.tif	predator	16.71	17.269	5.41143	6.33019	0.918759	1	0.29777	1.88494	0.273579
00000008_4.tif	predator	15.405	17.408	5.41143	6.41499	1.00356	1	0.29777	1.91019	0.29883
00000008_4.tif	predator	15.349	17.741	5.41143	6.75088	1.33945	1	0.29777	2.01021	0.398849
00000008_4.tif	predator	15.557	17.908	5.41143	6.90717	1.49574	1	0.29777	2.05675	0.445387
00000008_4.tif	predator	16.057	17.811	5.41143	6.81096	1.39954	1	0.29777	2.0281	0.41674
00000008_4.tif	predator	16.21	18.352	5.41143	7.3586	1.94717	1	0.29777	2.19117	0.579809
00000008_4.tif	predator	16.398	18.394	5.41143	7.4134	2.00197	1	0.29777	2.20749	0.596128
00000008_4.tif	predator	16.557	18.38	5.41143	7.41406	2.00263	1	0.29777	2.20768	0.596322
00000008_4.tif	predator	16.599	18.54	5.41143	7.57756	2.16613	1	0.29777	2.25637	0.645009
00000008_4.tif	predator	19.342	18.533	5.41143	8.32093	2.9095	1	0.29777	2.47772	0.866361
00000008_4.tif	predator	19.46	18.401	5.41143	8.25339	2.84196	1	0.29777	2.45761	0.84625
00000008_4.tif	predator	20.085	17.012	5.41143	7.38045	1.96902	1	0.29777	2.19768	0.586315
00000008_4.tif	predator	15.273	20.609	5.41143	9.61828	4.20686	1	0.29777	2.86404	1.25268
00000008_4.tif	predator	16.203	20.811	5.41143	9.8144	4.40297	1	0.29777	2.92243	1.31107
00000008_4.tif	predator	15.599	22.05	5.41143	11.0468	5.63535	1	0.29777	3.2894	1.67804
00000008_4.tif	predator	15.752	22.036	5.41143	11.0311	5.61966	1	0.29777	3.28473	1.67337
00000008_4.tif	predator	16.78	22.071	5.41143	11.1096	5.69815	1	0.29777	3.3081	1.69674
00000008_4.tif	predator	16.703	21.953	5.41143	10.9854	5.574	1	0.29777	3.27113	1.65977
00000008_4.tif	predator	19.828	20.627	5.41143	10.4323	5.02082	1	0.29777	3.10641	1.49505
00000008_4.tif	predator	20.391	20.3	5.41143	10.3683	4.95688	1	0.29777	3.08737	1.47601
00000008_4.tif	predator	20.432	17.835	5.41143	8.25422	2.84279	1	0.29777	2.45786	0.846498
00000008_4.tif	predator	20.682	18.12	5.41143	8.63055	3.21913	1	0.29777	2.56992	0.958559
00000008_4.tif	predator	22.009	18.481	5.41143	9.72006	4.30863	1	0.29777	2.89434	1.28298
00000008_4.tif	predator	23.002	17.28	5.41143	9.55446	4.14303	1	0.29777	2.84503	1.23367
00000008_4.tif	predator	20.307	16.474	5.41143	7.08873	1.6773	1	0.29777	2.11081	0.499449
00000008_4.tif	predator	20.46	15.168	5.41143	6.25093	0.839503	1	0.29777	1.86134	0.249979
00000008_4.tif	predator	20.592	15.384	5.41143	6.49366	1.08224	1	0.29777	1.93362	0.322257
00000008_4.tif	predator	22.21	15.425	5.41143	7.78864	2.37722	1	0.29777	2.31922	0.707863
00000008_4.tif	predator	22.564	15.87	5.41143	8.3343	2.92287	1	0.29777	2.4817	0.870343
00000008_4.tif	predator	23.161	16.078	5.41143	8.94225	3.53082	1	0.29777	2.66273	1.05137
00000008_4.tif	predator	24.168	12.964	5.41143	8.59717	3.18574	1	0.29777	2.55998	0.948618
00000008_4.tif	predator	23.509	12.422	5.41143	7.8411	2.42967	1	0.29777	2.33484	0.723483
00000008_4.tif	predator	25.3	11.675	5.41143	9.52659	4.11516	1	0.29777	2.83673	1.22537
00000008_4.tif	predator	25.071	11.481	5.41143	9.28621	3.87478	1	0.29777	2.76515	1.15379
00000008_4.tif	predator	23.099	9.95	5.41143	7.37782	1.96639	1	0.29777	2.19689	0.585533
00000008_4.tif	predator	23.259	9.491	5.41143	7.61404	2.20261	1	0.29777	2.26723	0.655872
00000008_4.tif	predator	24.439	10.609	5.41143	8.65107	3.23964	1	0.29777	2.57603	0.964668
00000008_4.tif	predator	24.655	10.79	5.41143	8.86061	3.44918	1	0.29777	2.63842	1.02706
00000008_4.tif	predator	24.648	10.866	5.41143	8.85209	3.44066	1	0.29777	2.63589	1.02453
00000008_4.tif	predator	25.155	10.72	5.41143	9.36234	3.95091	1	0.29777	2.78782	1.17646
00000008_4.tif	predator	25.238	9.623	5.41143	9.54161	4.13019	1	0.29777	2.84121	1.22985
00000008_4.tif	predator	21.12	7.644	5.41143	6.29529	0.88386	1	0.29777	1.87455	0.263187
00000008_4.tif	predator	21.439	7.38	5.41143	6.70618	1.29475	1	0.29777	1.9969	0.385537
00000008_4.tif	predator	23.37	7.72	5.41143	8.25479	2.84336	1	0.29777	2.45803	0.846668
00000008_4.tif	predator	23.557	7.165	5.41143	8.65813	3.2467	1	0.29777	2.57813	0.96677
00000008_4.tif	predator	24.724	8.339	5.41143	9.31659	3.90516	1	0.29777	2.7742	1.16284
00000008_4.tif	predator	22.578	5.998	5.41143	8.42924	3.01781	1	0.29777	2.50997	0.898612
00000008_4.tif	predator	23.377	5.609	5.41143	9.30447	3.89304	1	0.29777	2.77059	1.15923
00000008_4.tif	predator	23.356	6.387	5.41143	8.85801	3.44659	1	0.29777	2.63765	1.02629
00000009_1.tif	control	7.688	7.573	5.4584	6.78921	1.33081	1	0.29777	2.02162	0.396275
00000009_1.tif	control	7.523	7.641	5.4584	6.90457	1.44617	1	0.29777	2.05597	0.430627
00000009_1.tif	control	8.023	8.911	5.4584	5.95602	0.497618	1	0.29777	1.77352	0.148176
00000009_1.tif	control	7.946	9.036	5.4584	5.99236	0.533959	1	0.29777	1.78434	0.158997
00000009_1.tif	control	8.141	9.3	5.4584	5.73339	0.274986	1	0.29777	1.70723	0.0818826
00000009_1.tif	control	7.807	11.227	5.4584	5.90031	0.441913	1	0.29777	1.75694	0.131589
00000009_1.tif	control	7.418	11.311	5.4584	6.29505	0.836648	1	0.29777	1.87448	0.249129
00000009_1.tif	control	9.363	13.929	5.4584	5.36765	-0.0907494	0	0.29777	1.59833	-0.0270225
00000009_1.tif	control	9.363	13.755	5.4584	5.26646	-0.191935	0	0.29777	1.5682	-0.0571524
00000009_1.tif	control	9.196	13.7	5.4584	5.37406	-0.0843354	0	0.29777	1.60024	-0.0251125
00000009_1.tif	control	10.134	14.984	5.4584	5.5279	0.0695001	1	0.29777	1.64604	0.020695
00000009_1.tif	control	10.62	14.734	5.4584	5.02841	-0.429992	0	0.29777	1.49731	-0.128039
00000009_1.tif	control	10.911	13.998	5.4584	4.27332	-1.18508	0	0.29777	1.27247	-0.352882
00000009_1.tif	control	10.821	13.929	5.4584	4.28086	-1.17754	0	0.29777	1.27471	-0.350637
00000009_1.tif	control	10.703	13.929	5.4584	4.36076	-1.09763	0	0.29777	1.2985	-0.326843
00000009_1.tif	control	9.849	13.498	5.4584	4.72117	-0.737232	0	0.29777	1.40582	-0.219525
00000009_1.tif	control	8.927	12.099	5.4584	4.94843	-0.509973	0	0.29777	1.47349	-0.151855
00000009_1.tif	control	9.339	12.438	5.4584	4.6651	-0.793301	0	0.29777	1.38913	-0.236221
00000009_1.tif	control	9.031	13.047	5.4584	5.19267	-0.265726	0	0.29777	1.54622	-0.0791252
00000009_1.tif	control	9.109	13.12	5.4584	5.15598	-0.302418	0	0.29777	1.5353	-0.0900511
00000009_1.tif	control	9.391	12.953	5.4584	4.82881	-0.629588	0	0.29777	1.43788	-0.187472
00000009_1.tif	control	9.63	12.953	5.4584	4.61742	-0.840979	0	0.29777	1.37493	-0.250418
00000009_1.tif	control	9.458	12.682	5.4584	4.65033	-0.808074	0	0.29777	1.38473	-0.24062
00000009_1.tif	control	11.036	12.849	5.4584	3.38215	-2.07625	0	0.29777	1.0071	-0.618246
00000009_1.tif	control	11.052	12.693	5.4584	3.27471	-2.18369	0	0.29777	0.975111	-0.650236
00000009_1.tif	control	10.917	12.484	5.4584	3.26882	-2.18958	0	0.29777	0.973357	-0.65199
00000009_1.tif	control	11.349	12.422	5.4584	2.87515	-2.58325	0	0.29777	0.856134	-0.769213
00000009_1.tif	control	11.786	12.885	5.4584	2.85934	-2.59906	0	0.29777	0.851426	-0.773922
00000009_1.tif	control	11.865	12.146	5.4584	2.29612	-3.16228	0	0.29777	0.683714	-0.941633
00000009_1.tif	control	11.667	11.995	5.4584	2.3737	-3.0847	0	0.29777	0.706818	-0.91853
00000009_1.tif	control	11.719	11.901	5.4584	2.28074	-3.17766	0	0.29777	0.679135	-0.946212
00000009_1.tif	control	11.839	11.745	5.4584	2.09972	-3.35868	0	0.29777	0.625234	-1.00011
00000009_1.tif	control	10.672	11.943	5.4584	3.24338	-2.21502	0	0.29777	0.965781	-0.659567
00000009_1.tif	control	9.594	11.682	5.4584	4.19875	-1.25965	0	0.29777	1.25026	-0.375087
00000009_1.tif	control	9.521	11.688	5.4584	4.27127	-1.18713	0	0.29777	1.27186	-0.353492
00000009_1.tif	control	10.354	11.411	5.4584	3.39889	-2.05951	0	0.29777	1.01209	-0.613259
00000009_1.tif	control	9.146	11.073	5.4584	4.55347	-0.904929	0	0.29777	1.35589	-0.269461
00000009_1.tif	control	9.552	11.01	5.4584	4.14416	-1.31424	0	0.29777	1.23401	-0.39134
00000009_1.tif	control	9.156	10.797	5.4584	4.53224	-0.926156	0	0.29777	1.34957	-0.275781
00000009_1.tif	control	9.146	10.62	5.4584	4.54386	-0.914539	0	0.29777	1.35303	-0.272322
00000009_1.tif	control	9.245	10.62	5.4584	4.4449	-1.0135	0	0.29777	1.32356	-0.301789
00000009_1.tif	control	8.797	10.74	5.4584	4.89101	-0.567389	0	0.29777	1.4564	-0.168951
00000009_1.tif	control	11	10.964	5.4584	2.69651	-2.76189	0	0.29777	0.802938	-0.822409
00000009_1.tif	control	11.255	11.385	5.4584	2.5145	-2.9439	0	0.29777	0.748743	-0.876605
00000009_1.tif	control	11.578	11.266	5.4584	2.17218	-3.28622	0	0.29777	0.646809	-0.978538
00000009_1.tif	control	11.844	11.109	5.4584	1.87862	-3.57978	0	0.29777	0.559397	-1.06595
00000009_1.tif	control	11.943	11.005	5.4584	1.76353	-3.69487	0	0.29777	0.525127	-1.10022
00000009_1.tif	control	11.943	11.141	5.4584	1.78827	-3.67013	0	0.29777	0.532493	-1.09285
00000009_1.tif	control	9.031	9.812	5.4584	4.75053	-0.707874	0	0.29777	1.41456	-0.210784
00000009_1.tif	control	9.76	10.141	5.4584	3.97493	-1.48347	0	0.29777	1.18361	-0.441733
00000009_1.tif	control	9.917	9.781	5.4584	3.89351	-1.56489	0	0.29777	1.15937	-0.465978
00000009_1.tif	control	8.635	9.099	5.4584	5.31588	-0.142517	0	0.29777	1.58291	-0.0424372
00000009_1.tif	control	9.229	9.073	5.4584	4.76393	-0.694471	0	0.29777	1.41855	-0.206793
00000009_1.tif	control	9.146	8.74	5.4584	4.96688	-0.491523	0	0.29777	1.47899	-0.146361
00000009_1.tif	control	8.901	8.323	5.4584	5.36709	-0.0913054	0	0.29777	1.59816	-0.027188
00000009_1.tif	control	9.01	8.276	5.4584	5.29191	-0.166485	0	0.29777	1.57577	-0.0495742
00000009_1.tif	control	9.089	8.182	5.4584	5.26739	-0.191007	0	0.29777	1.56847	-0.0568761
00000009_1.tif	control	11.021	8.63	5.4584	3.40695	-2.05145	0	0.29777	1.01449	-0.610861
00000009_1.tif	control	11.38	8.193	5.4584	3.44458	-2.01382	0	0.29777	1.02569	-0.599656
00000009_1.tif	control	11.667	8.12	5.4584	3.31683	-2.14157	0	0.29777	0.987652	-0.637696
00000009_1.tif	control	9.109	7.958	5.4584	5.36307	-0.0953308	0	0.29777	1.59696	-0.0283866
00000009_1.tif	control	9.281	7.755	5.4584	5.32838	-0.130016	0	0.29777	1.58663	-0.0387147
00000009_1.tif	control	9.12	7.698	5.4584	5.49375	0.0353542	1	0.29777	1.63587	0.0105274
00000009_1.tif	control	9.583	7.844	5.4584	5.0295	-0.4289	0	0.29777	1.49763	-0.127714
00000009_1.tif	control	9.958	7.562	5.4584	4.90675	-0.551644	0	0.29777	1.46108	-0.164263
00000009_1.tif	control	10.87	7.625	5.4584	4.20794	-1.25046	0	0.29777	1.253	-0.37235
00000009_1.tif	control	11.01	7.448	5.4584	4.25146	-1.20694	0	0.29777	1.26596	-0.359391
00000009_1.tif	control	11.135	7.531	5.4584	4.1085	-1.3499	0	0.29777	1.22339	-0.40196
00000009_1.tif	control	11.172	7.651	5.4584	3.99175	-1.46665	0	0.29777	1.18862	-0.436725
00000009_1.tif	control	10.484	6.635	5.4584	5.21525	-0.243149	0	0.29777	1.55295	-0.0724023
00000009_1.tif	control	10.12	3.25	5.4584	8.30546	2.84706	1	0.29777	2.47312	0.847768
00000009_1.tif	control	10.01	3.24	5.4584	8.36228	2.90388	1	0.29777	2.49004	0.86469
00000009_1.tif	control	13.875	5.318	5.4584	5.43522	-0.0231815	0	0.29777	1.61844	-0.00690276
00000009_1.tif	control	13.969	5.411	5.4584	5.34639	-0.11201	0	0.29777	1.59199	-0.0333531
00000009_1.tif	control	12.182	6.271	5.4584	4.72541	-0.732992	0	0.29777	1.40708	-0.218263
00000009_1.tif	control	12.297	6.557	5.4584	4.41771	-1.04069	0	0.29777	1.31546	-0.309887
00000009_1.tif	control	12.339	6.729	5.4584	4.24125	-1.21714	0	0.29777	1.26292	-0.362429
00000009_1.tif	control	13.406	6.411	5.4584	4.34815	-1.11025	0	0.29777	1.29475	-0.330598
00000009_1.tif	control	13.87	6.901	5.4584	3.8533	-1.6051	0	0.29777	1.1474	-0.47795
00000009_1.tif	control	14.062	6.812	5.4584	3.95572	-1.50268	0	0.29777	1.17789	-0.447453
00000009_1.tif	control	13.635	8.094	5.4584	2.65653	-2.80187	0	0.29777	0.791035	-0.834313
00000009_1.tif	control	12.207	8.571	5.4584	2.63465	-2.82375	0	0.29777	0.784521	-0.840827
00000009_1.tif	control	12.075	9.158	5.4584	2.26633	-3.19207	0	0.29777	0.674844	-0.950504
00000009_1.tif	control	12.231	9.155	5.4584	2.16029	-3.2981	0	0.29777	0.643271	-0.982077
00000009_1.tif	control	12.894	9.116	5.4584	1.8167	-3.6417	0	0.29777	0.540958	-1.08439
00000009_1.tif	control	12.512	9.679	5.4584	1.5906	-3.8678	0	0.29777	0.473634	-1.15171
00000009_1.tif	control	12.467	9.745	5.4584	1.58141	-3.87699	0	0.29777	0.470897	-1.15445
00000009_1.tif	control	12.839	9.679	5.4584	1.36669	-4.09171	0	0.29777	0.406959	-1.21839
00000009_1.tif	control	12.884	9.738	5.4584	1.2925	-4.1659	0	0.29777	0.384868	-1.24048
00000009_1.tif	control	12.88	9.849	5.4584	1.21023	-4.24817	0	0.29777	0.360371	-1.26498
00000009_1.tif	control	13.137	9.78	5.4584	1.11557	-4.34283	0	0.29777	0.332184	-1.29316
00000009_1.tif	control	13.182	9.717	5.4584	1.15027	-4.30813	0	0.29777	0.342516	-1.28283
00000009_1.tif	control	13.377	9.599	5.4584	1.19228	-4.26612	0	0.29777	0.355024	-1.27032
00000009_1.tif	control	13.168	10.033	5.4584	0.885714	-4.57269	0	0.29777	0.263739	-1.36161
00000009_1.tif	control	13.106	10.071	5.4584	0.894296	-4.5641	0	0.29777	0.266294	-1.35905
00000009_1.tif	control	13.026	10.217	5.4584	0.849902	-4.6085	0	0.29777	0.253075	-1.37227
00000009_1.tif	control	12.859	10.453	5.4584	0.880596	-4.5778	0	0.29777	0.262215	-1.36313
00000009_1.tif	control	12.102	11.158	5.4584	1.63764	-3.82076	0	0.29777	0.48764	-1.13771
00000009_1.tif	control	12.964	10.953	5.4584	0.751921	-4.70648	0	0.29777	0.223899	-1.40145
00000009_1.tif	control	13.196	10.665	5.4584	0.499288	-4.95911	0	0.29777	0.148673	-1.47667
00000009_1.tif	control	13.2	10.561	5.4584	0.523321	-4.93508	0	0.29777	0.155829	-1.46952
00000009_1.tif	control	12.505	11.589	5.4584	1.45031	-4.00809	0	0.29777	0.43186	-1.19349
00000009_1.tif	control	12.37	12.165	5.4584	1.93374	-3.52466	0	0.29777	0.57581	-1.04954
00000009_1.tif	control	12.526	12.453	5.4584	2.06166	-3.39674	0	0.29777	0.613901	-1.01145
00000009_1.tif	control	12.641	12.234	5.4584	1.81617	-3.64223	0	0.29777	0.5408	-1.08455
00000009_1.tif	control	12.727	12.422	5.4584	1.9285	-3.5299	0	0.29777	0.574249	-1.0511
00000009_1.tif	control	12.873	11.911	5.4584	1.4185	-4.0399	0	0.29777	0.422387	-1.20296
00000009_1.tif	control	12.915	12.109	5.4584	1.56346	-3.89494	0	0.29777	0.465552	-1.1598
00000009_1.tif	control	13.064	11.946	5.4584	1.349	-4.1094	0	0.29777	0.401691	-1.22366
00000009_1.tif	control	13.12	12.21	5.4584	1.5666	-3.8918	0	0.29777	0.466485	-1.15886
00000009_1.tif	control	13.217	12.148	5.4584	1.47521	-3.98319	0	0.29777	0.439273	-1.18607
00000009_1.tif	control	13.276	12.061	5.4584	1.37421	-4.08419	0	0.29777	0.4092	-1.21615
00000009_1.tif	control	13.325	11.964	5.4584	1.26711	-4.19129	0	0.29777	0.377307	-1.24804
00000009_1.tif	control	13.37	12.22	5.4584	1.504	-3.9544	0	0.29777	0.447847	-1.1775
00000009_1.tif	control	13.262	12.425	5.4584	1.72832	-3.73008	0	0.29777	0.514643	-1.1107
00000009_1.tif	control	13.078	12.467	5.4584	1.82214	-3.63626	0	0.29777	0.542578	-1.08277
00000009_1.tif	control	13.033	12.543	5.4584	1.90889	-3.54951	0	0.29777	0.568411	-1.05694
00000009_1.tif	control	13.012	12.693	5.4584	2.05724	-3.40116	0	0.29777	0.612584	-1.01276
00000009_1.tif	control	12.97	11.408	5.4584	0.973903	-4.4845	0	0.29777	0.289999	-1.33535
00000009_1.tif	control	13.182	11.641	5.4584	1.02465	-4.43374	0	0.29777	0.305111	-1.32024
00000009_1.tif	control	13.21	11.422	5.4584	0.824662	-4.63374	0	0.29777	0.24556	-1.37979
00000009_1.tif	control	13.262	11.335	5.4584	0.723672	-4.73473	0	0.29777	0.215488	-1.40986
00000009_1.tif	control	13.384	11.474	5.4584	0.785234	-4.67317	0	0.29777	0.233819	-1.39153
00000009_1.tif	control	13.387	11.318	5.4584	0.642826	-4.81557	0	0.29777	0.191414	-1.43393
00000009_1.tif	control	13.401	11.071	5.4584	0.430593	-5.02781	0	0.29777	0.128218	-1.49713
00000009_1.tif	control	13.359	10.87	5.4584	0.350201	-5.1082	0	0.29777	0.104279	-1.52107
00000009_1.tif	control	12.54	13.276	5.4584	2.77463	-2.68377	0	0.29777	0.826202	-0.799146
00000009_1.tif	control	12.54	18.398	5.4584	7.73368	2.27528	1	0.29777	2.30286	0.67751
00000009_1.tif	control	12.696	18.609	5.4584	7.92136	2.46296	1	0.29777	2.35874	0.733396
00000009_1.tif	control	13.516	19.057	5.4584	8.30878	2.85038	1	0.29777	2.47411	0.848758
00000009_1.tif	control	13.609	15.571	5.4584	4.82165	-0.636752	0	0.29777	1.43574	-0.189606
00000009_1.tif	control	13.828	15.689	5.4584	4.94098	-0.517416	0	0.29777	1.47128	-0.154071
00000009_1.tif	control	14.148	15.714	5.4584	4.98527	-0.473131	0	0.29777	1.48446	-0.140884
00000009_1.tif	control	14.422	15.29	5.4584	4.59895	-0.859448	0	0.29777	1.36943	-0.255918
00000009_1.tif	control	14.283	15.144	5.4584	4.4341	-1.0243	0	0.29777	1.32034	-0.305005
00000009_1.tif	control	14.37	14.828	5.4584	4.13464	-1.32376	0	0.29777	1.23117	-0.394177
00000009_1.tif	control	14.05	14.29	5.4584	3.55846	-1.89994	0	0.29777	1.0596	-0.565745
00000009_1.tif	control	14.804	14.714	5.4584	4.1181	-1.3403	0	0.29777	1.22625	-0.399101
00000009_1.tif	control	15.155	14.72	5.4584	4.23237	-1.22603	0	0.29777	1.26027	-0.365074
00000009_1.tif	control	15.231	14.922	5.4584	4.44819	-1.01021	0	0.29777	1.32454	-0.300809
00000009_1.tif	control	15.356	14.87	5.4584	4.44484	-1.01356	0	0.29777	1.32354	-0.301807
00000009_1.tif	control	15.036	14.148	5.4584	3.65561	-1.80279	0	0.29777	1.08853	-0.536816
00000009_1.tif	control	15.276	13.977	5.4584	3.59656	-1.86184	0	0.29777	1.07095	-0.554399
00000009_1.tif	control	14.429	13.738	5.4584	3.07851	-2.37989	0	0.29777	0.916688	-0.70866
00000009_1.tif	control	14.37	13.689	5.4584	3.01709	-2.44131	0	0.29777	0.8984	-0.726948
00000009_1.tif	control	13.443	13.245	5.4584	2.507	-2.9514	0	0.29777	0.746509	-0.878838
00000009_1.tif	control	13.474	12.599	5.4584	1.86134	-3.59706	0	0.29777	0.554252	-1.0711
00000009_1.tif	control	13.516	12.398	5.4584	1.65695	-3.80145	0	0.29777	0.49339	-1.13196
00000009_1.tif	control	13.484	12.231	5.4584	1.49498	-3.96342	0	0.29777	0.445161	-1.18019
00000009_1.tif	control	13.665	12.53	5.4584	1.78015	-3.67825	0	0.29777	0.530075	-1.09527
00000009_1.tif	control	13.731	12.339	5.4584	1.58958	-3.86882	0	0.29777	0.47333	-1.15202
00000009_1.tif	control	13.589	12.026	5.4584	1.27983	-4.17856	0	0.29777	0.381096	-1.24425
00000009_1.tif	control	13.71	11.908	5.4584	1.15821	-4.30019	0	0.29777	0.34488	-1.28047
00000009_1.tif	control	13.967	12.012	5.4584	1.29247	-4.16593	0	0.29777	0.38486	-1.24049
00000009_1.tif	control	13.932	12.22	5.4584	1.49011	-3.96829	0	0.29777	0.443711	-1.18164
00000009_1.tif	control	14.245	12.446	5.4584	1.78512	-3.67328	0	0.29777	0.531556	-1.09379
00000009_1.tif	control	14.352	12.474	5.4584	1.84745	-3.61095	0	0.29777	0.550115	-1.07523
00000009_1.tif	control	14.391	12.161	5.4584	1.57643	-3.88197	0	0.29777	0.469413	-1.15593
00000009_1.tif	control	14.602	11.984	5.4584	1.53563	-3.92277	0	0.29777	0.457264	-1.16808
00000009_1.tif	control	15.224	12.734	5.4584	2.50909	-2.94931	0	0.29777	0.747133	-0.878215
00000009_1.tif	control	15.227	12.231	5.4584	2.13586	-3.32254	0	0.29777	0.635994	-0.989354
00000009_1.tif	control	15.109	12.116	5.4584	1.97109	-3.48731	0	0.29777	0.586932	-1.03842
00000009_1.tif	control	15.561	12.259	5.4584	2.40525	-3.05315	0	0.29777	0.71621	-0.909137
00000009_1.tif	control	15.352	11.589	5.4584	1.86355	-3.59485	0	0.29777	0.554909	-1.07044
00000009_1.tif	control	15.214	11.578	5.4584	1.73616	-3.72224	0	0.29777	0.516977	-1.10837
00000009_1.tif	control	15.276	11.484	5.4584	1.74943	-3.70897	0	0.29777	0.520927	-1.10442
00000009_1.tif	control	13.693	11.418	5.4584	0.668019	-4.79038	0	0.29777	0.198916	-1.42643
00000009_1.tif	control	13.543	11.484	5.4584	0.748185	-4.71021	0	0.29777	0.222787	-1.40256
00000009_1.tif	control	13.53	11.28	5.4584	0.55305	-4.90535	0	0.29777	0.164682	-1.46067
00000009_1.tif	control	13.547	11.123	5.4584	0.398761	-5.05964	0	0.29777	0.118739	-1.50661
00000009_1.tif	control	13.439	11.526	5.4584	0.814971	-4.64343	0	0.29777	0.242674	-1.38267
00000009_1.tif	control	13.561	10.95	5.4584	0.236916	-5.22148	0	0.29777	0.0705464	-1.5548
00000009_1.tif	control	13.439	10.62	5.4584	0.280893	-5.17751	0	0.29777	0.0836416	-1.54171
00000009_1.tif	control	13.512	10.356	5.4584	0.431523	-5.02688	0	0.29777	0.128495	-1.49685
00000009_1.tif	control	13.88	10.797	5.4584	0.197669	-5.26073	0	0.29777	0.0588599	-1.56649
00000009_1.tif	control	14.224	10.613	5.4584	0.553231	-4.90517	0	0.29777	0.164736	-1.46061
00000009_1.tif	control	14.828	10.609	5.4584	1.14869	-4.30971	0	0.29777	0.342044	-1.2833
00000009_1.tif	control	14.7	10.293	5.4584	1.1104	-4.348	0	0.29777	0.330644	-1.2947
00000009_1.tif	control	13.557	9.894	5.4584	0.865966	-4.59243	0	0.29777	0.257859	-1.36749
00000009_1.tif	control	13.582	9.97	5.4584	0.78717	-4.67123	0	0.29777	0.234395	-1.39095
00000009_1.tif	control	13.766	10.026	5.4584	0.72819	-4.73021	0	0.29777	0.216833	-1.40851
00000009_1.tif	control	13.96	10.082	5.4584	0.721254	-4.73714	0	0.29777	0.214768	-1.41058
00000009_1.tif	control	13.582	9.682	5.4584	1.07325	-4.38515	0	0.29777	0.319581	-1.30577
00000009_1.tif	control	13.62	9.554	5.4584	1.19793	-4.26047	0	0.29777	0.356708	-1.26864
00000009_1.tif	control	13.689	9.467	5.4584	1.283	-4.1754	0	0.29777	0.382039	-1.24331
00000009_1.tif	control	13.901	9.464	5.4584	1.30352	-4.15488	0	0.29777	0.388149	-1.2372
00000009_1.tif	control	13.894	9.651	5.4584	1.11814	-4.34026	0	0.29777	0.332949	-1.2924
00000009_1.tif	control	13.627	9.408	5.4584	1.34339	-4.11501	0	0.29777	0.40002	-1.22533
00000009_1.tif	control	13.578	9.186	5.4584	1.56786	-3.89054	0	0.29777	0.466863	-1.15848
00000009_1.tif	control	14.467	9.54	5.4584	1.43908	-4.01932	0	0.29777	0.428514	-1.19683
00000009_1.tif	control	14.7	9.512	5.4584	1.599	-3.8594	0	0.29777	0.476133	-1.14921
00000009_1.tif	control	15.425	9.873	5.4584	1.94584	-3.51256	0	0.29777	0.579413	-1.04593
00000009_1.tif	control	15.491	9.498	5.4584	2.19507	-3.26333	0	0.29777	0.653625	-0.971723
00000009_1.tif	control	15.432	8.873	5.4584	2.56216	-2.89624	0	0.29777	0.762934	-0.862413
00000009_1.tif	control	15.165	8.946	5.4584	2.33151	-3.12689	0	0.29777	0.694254	-0.931093
00000009_1.tif	control	14.995	8.832	5.4584	2.32099	-3.13741	0	0.29777	0.69112	-0.934228
00000009_1.tif	control	15.057	8.745	5.4584	2.42779	-3.0306	0	0.29777	0.722924	-0.902423
00000009_1.tif	control	14.967	8.682	5.4584	2.43156	-3.02684	0	0.29777	0.724044	-0.901303
00000009_1.tif	control	14.995	8.592	5.4584	2.52294	-2.93546	0	0.29777	0.751255	-0.874093
00000009_1.tif	control	15.349	8.13	5.4584	3.10215	-2.35625	0	0.29777	0.923727	-0.701621
00000009_1.tif	control	15.46	7.998	5.4584	3.27315	-2.18525	0	0.29777	0.974645	-0.650703
00000009_1.tif	control	15.113	7.727	5.4584	3.34203	-2.11637	0	0.29777	0.995156	-0.630192
00000009_1.tif	control	14.575	7.95	5.4584	2.93714	-2.52126	0	0.29777	0.874591	-0.750757
00000009_1.tif	control	14.342	7.991	5.4584	2.83545	-2.62295	0	0.29777	0.844313	-0.781035
00000009_1.tif	control	14.599	6.283	5.4584	4.55895	-0.899451	0	0.29777	1.35752	-0.26783
00000009_1.tif	control	14.828	6.068	5.4584	4.81879	-0.639611	0	0.29777	1.43489	-0.190457
00000009_1.tif	control	16.401	5.328	5.4584	6.06287	0.604476	1	0.29777	1.80534	0.179995
00000009_1.tif	control	15.969	6.578	5.4584	4.75484	-0.703555	0	0.29777	1.41585	-0.209498
00000009_1.tif	control	16.224	6.839	5.4584	4.66125	-0.797153	0	0.29777	1.38798	-0.237368
00000009_1.tif	control	16.396	6.526	5.4584	5.01751	-0.440886	0	0.29777	1.49406	-0.131283
00000009_1.tif	control	16.458	6.49	5.4584	5.08139	-0.377012	0	0.29777	1.51308	-0.112263
00000009_1.tif	control	17.964	7.495	5.4584	5.37394	-0.0844622	0	0.29777	1.6002	-0.0251503
00000009_1.tif	control	18.12	7.479	5.4584	5.50836	0.0499638	1	0.29777	1.64023	0.0148777
00000009_1.tif	control	16.896	8.792	5.4584	3.75833	-1.70007	0	0.29777	1.11912	-0.50623
00000009_1.tif	control	16.906	8.906	5.4584	3.70889	-1.74951	0	0.29777	1.1044	-0.520952
00000009_1.tif	control	16.634	9.214	5.4584	3.32238	-2.13602	0	0.29777	0.989305	-0.636042
00000009_1.tif	control	17.127	9.224	5.4584	3.76237	-1.69603	0	0.29777	1.12032	-0.505028
00000009_1.tif	control	17.411	8.939	5.4584	4.1401	-1.3183	0	0.29777	1.2328	-0.392549
00000009_1.tif	control	16.453	9.939	5.4584	2.88148	-2.57692	0	0.29777	0.858019	-0.767328
00000009_1.tif	control	16.408	10.05	5.4584	2.80863	-2.64977	0	0.29777	0.836326	-0.789022
00000009_1.tif	control	16.717	9.964	5.4584	3.12932	-2.32908	0	0.29777	0.931817	-0.69353
00000009_1.tif	control	17.627	9.707	5.4584	4.07475	-1.38365	0	0.29777	1.21334	-0.41201
00000009_1.tif	control	17.512	9.929	5.4584	3.91114	-1.54726	0	0.29777	1.16462	-0.460727
00000009_1.tif	control	18.311	10.186	5.4584	4.65728	-0.801123	0	0.29777	1.3868	-0.23855
00000009_1.tif	control	18.363	10.259	5.4584	4.70071	-0.757686	0	0.29777	1.39973	-0.225616
00000009_1.tif	control	18.443	10.266	5.4584	4.77957	-0.67883	0	0.29777	1.42321	-0.202135
00000009_1.tif	control	18.03	10.873	5.4584	4.34374	-1.11466	0	0.29777	1.29344	-0.331912
00000009_1.tif	control	18.005	10.804	5.4584	4.31734	-1.14106	0	0.29777	1.28557	-0.339774
00000009_1.tif	control	17.814	10.859	5.4584	4.12744	-1.33096	0	0.29777	1.22903	-0.39632
00000009_1.tif	control	17.793	10.96	5.4584	4.11037	-1.34803	0	0.29777	1.22394	-0.401403
00000009_1.tif	control	17.432	10.755	5.4584	3.744	-1.7144	0	0.29777	1.11485	-0.510496
00000009_1.tif	control	17.276	10.491	5.4584	3.59734	-1.86106	0	0.29777	1.07118	-0.554169
00000009_1.tif	control	17.311	10.422	5.4584	3.63782	-1.82058	0	0.29777	1.08323	-0.542115
00000009_1.tif	control	15.839	10.991	5.4584	2.16446	-3.29394	0	0.29777	0.644511	-0.980837
00000009_1.tif	control	15.776	11.13	5.4584	2.1223	-3.3361	0	0.29777	0.631956	-0.993391
00000009_1.tif	control	15.877	11.845	5.4584	2.4476	-3.0108	0	0.29777	0.728822	-0.896526
00000009_1.tif	control	15.894	11.977	5.4584	2.52428	-2.93412	0	0.29777	0.751653	-0.873694
00000009_1.tif	control	15.967	12.068	5.4584	2.63267	-2.82573	0	0.29777	0.783931	-0.841417
00000009_1.tif	control	16.127	12.016	5.4584	2.748	-2.7104	0	0.29777	0.81827	-0.807077
00000009_1.tif	control	16.901	11.748	5.4584	3.36443	-2.09397	0	0.29777	1.00183	-0.623522
00000009_1.tif	control	17.116	12.224	5.4584	3.73147	-1.72693	0	0.29777	1.11112	-0.514228
00000009_1.tif	control	17.592	12.922	5.4584	4.46753	-0.990872	0	0.29777	1.3303	-0.295052
00000009_1.tif	control	16.22	14.023	5.4584	4.13806	-1.32034	0	0.29777	1.23219	-0.393157
00000009_1.tif	control	15.62	14.21	5.4584	3.96286	-1.49554	0	0.29777	1.18002	-0.445328
00000009_1.tif	control	16.019	15.224	5.4584	5.04482	-0.413577	0	0.29777	1.5022	-0.123151
00000009_1.tif	control	17.825	17.266	5.4584	7.71836	2.25996	1	0.29777	2.29829	0.672947
00000009_1.tif	control	18.719	17.005	5.4584	8.0272	2.5688	1	0.29777	2.39026	0.764913
00000009_1.tif	control	18.906	16.927	5.4584	8.08597	2.62757	1	0.29777	2.40776	0.782411
00000009_6.tif	predator	6.594	11.891	5.42186	8.35923	2.93737	1	0.29777	2.48913	0.874661
00000009_6.tif	predator	8.161	10.635	5.42186	6.9187	1.49684	1	0.29777	2.06018	0.445714
00000009_6.tif	predator	8.531	13.349	5.42186	6.57198	1.15012	1	0.29777	1.95694	0.342471
00000009_6.tif	predator	7.479	13.839	5.42186	7.70829	2.28643	1	0.29777	2.2953	0.680829
00000009_6.tif	predator	7.219	13.766	5.42186	7.94366	2.5218	1	0.29777	2.36538	0.750917
00000009_6.tif	predator	6.24	13.818	5.42186	8.91036	3.48851	1	0.29777	2.65324	1.03877
00000009_6.tif	predator	6.198	13.667	5.42186	8.9212	3.49934	1	0.29777	2.65647	1.042
00000009_6.tif	predator	8.089	14.432	5.42186	7.29794	1.87608	1	0.29777	2.17311	0.558641
00000009_6.tif	predator	7.656	16.37	5.42186	8.52972	3.10786	1	0.29777	2.53989	0.925427
00000009_6.tif	predator	8.276	18.281	5.42186	9.19923	3.77738	1	0.29777	2.73926	1.12479
00000009_6.tif	predator	11.047	20.87	5.42186	9.73497	4.31312	1	0.29777	2.89878	1.28432
00000009_6.tif	predator	11.083	20.651	5.42186	9.52009	4.09823	1	0.29777	2.8348	1.22033
00000009_6.tif	predator	11.281	20.359	5.42186	9.17303	3.75117	1	0.29777	2.73145	1.11699
00000009_6.tif	predator	11.703	18.609	5.42186	7.40708	1.98522	1	0.29777	2.20561	0.591139
00000009_6.tif	predator	11.724	17.552	5.42186	6.46338	1.04152	1	0.29777	1.9246	0.310133
00000009_6.tif	predator	11.745	17.417	5.42186	6.33613	0.914272	1	0.29777	1.88671	0.272243
00000009_6.tif	predator	10.995	17.479	5.42186	6.79724	1.37538	1	0.29777	2.02401	0.409547
00000009_6.tif	predator	10.391	17.016	5.42186	6.81512	1.39326	1	0.29777	2.02934	0.41487
00000009_6.tif	predator	10.432	16.698	5.42186	6.55397	1.13211	1	0.29777	1.95157	0.337107
00000009_6.tif	predator	10.479	16.521	5.42186	6.39401	0.972146	1	0.29777	1.90394	0.289476
00000009_6.tif	predator	11.63	15.714	5.42186	5.01871	-0.403149	0	0.29777	1.49442	-0.120046
00000009_6.tif	predator	10.891	15.516	5.42186	5.40322	-0.0186365	0	0.29777	1.60892	-0.00554939
00000009_6.tif	predator	10.677	15.328	5.42186	5.44746	0.0255993	1	0.29777	1.62209	0.00762269
00000009_6.tif	predator	11.26	14.849	5.42186	4.69309	-0.728772	0	0.29777	1.39746	-0.217006
00000009_6.tif	predator	9.562	14.964	5.42186	6.17487	0.75301	1	0.29777	1.83869	0.224224
00000009_6.tif	predator	9.51	13.422	5.42186	5.63775	0.21589	1	0.29777	1.67875	0.0642855
00000009_6.tif	predator	9.557	13.417	5.42186	5.59107	0.169215	1	0.29777	1.66485	0.0503873
00000009_6.tif	predator	9.766	13.974	5.42186	5.56681	0.144954	1	0.29777	1.65763	0.043163
00000009_6.tif	predator	10.026	13.776	5.42186	5.25344	-0.168416	0	0.29777	1.56432	-0.0501494
00000009_6.tif	predator	10.125	14.13	5.42186	5.29612	-0.125737	0	0.29777	1.57703	-0.0374406
00000009_6.tif	predator	11.109	14.568	5.42186	4.64915	-0.772713	0	0.29777	1.38438	-0.230091
00000009_6.tif	predator	9.302	12.182	5.42186	5.65564	0.233779	1	0.29777	1.68408	0.0696124
00000009_6.tif	predator	9.24	11.964	5.42186	5.71301	0.291152	1	0.29777	1.70116	0.0866962
00000009_6.tif	predator	10.734	10.089	5.42186	4.61242	-0.809435	0	0.29777	1.37344	-0.241025
00000009_6.tif	predator	11.146	8.844	5.42186	4.91519	-0.506665	0	0.29777	1.4636	-0.15087
00000009_6.tif	predator	11.365	8	5.42186	5.33853	-0.0833242	0	0.29777	1.58966	-0.0248115
00000009_6.tif	predator	11.865	7.349	5.42186	5.5437	0.121837	1	0.29777	1.65075	0.0362793
00000009_6.tif	predator	11.776	7.052	5.42186	5.84064	0.418786	1	0.29777	1.73917	0.124702
00000009_6.tif	predator	11.354	5.443	5.42186	7.43861	2.01675	1	0.29777	2.21499	0.600528
00000009_6.tif	predator	12.849	6.099	5.42186	6.22062	0.798763	1	0.29777	1.85231	0.237848
00000009_6.tif	predator	13.802	6.391	5.42186	5.67985	0.257987	1	0.29777	1.69129	0.0768207
00000009_6.tif	predator	13.938	6.302	5.42186	5.74143	0.319572	1	0.29777	1.70963	0.0951589
00000009_6.tif	predator	12.609	7.109	5.42186	5.38133	-0.0405327	0	0.29777	1.6024	-0.0120694
00000009_6.tif	predator	12.427	9.141	5.42186	3.77995	-1.64191	0	0.29777	1.12556	-0.488911
00000009_6.tif	predator	12.339	9.047	5.42186	3.90869	-1.51317	0	0.29777	1.16389	-0.450577
00000009_6.tif	predator	12.318	9.224	5.42186	3.7935	-1.62836	0	0.29777	1.12959	-0.484876
00000009_6.tif	predator	12.125	15.734	5.42186	4.7216	-0.700255	0	0.29777	1.40595	-0.208515
00000009_6.tif	predator	12.26	15.5	5.42186	4.45348	-0.968382	0	0.29777	1.32611	-0.288355
00000009_6.tif	predator	12.474	15.745	5.42186	4.53042	-0.891439	0	0.29777	1.34902	-0.265444
00000009_6.tif	predator	11.922	16.068	5.42186	5.11079	-0.311068	0	0.29777	1.52184	-0.0926267
00000009_6.tif	predator	13.188	16.656	5.42186	5.02329	-0.39857	0	0.29777	1.49578	-0.118682
00000009_6.tif	predator	13.38	16.667	5.42186	4.96952	-0.452339	0	0.29777	1.47977	-0.134693
00000009_6.tif	predator	13.526	17.755	5.42186	5.97491	0.55305	1	0.29777	1.77915	0.164682
00000009_6.tif	predator	12.396	18.234	5.42186	6.78153	1.35968	1	0.29777	2.01934	0.404871
00000009_6.tif	predator	12.245	18.266	5.42186	6.8693	1.44744	1	0.29777	2.04547	0.431003
00000009_6.tif	predator	12.01	18.641	5.42186	7.30689	1.88503	1	0.29777	2.17577	0.561305
00000009_6.tif	predator	14.333	18.589	5.42186	6.6649	1.24304	1	0.29777	1.98461	0.37014
00000009_6.tif	predator	12.208	19.849	5.42186	8.35954	2.93768	1	0.29777	2.48922	0.874752
00000009_6.tif	predator	12.349	20	5.42186	8.45784	3.03598	1	0.29777	2.51849	0.904024
00000009_6.tif	predator	12.328	20.188	5.42186	8.64325	3.2214	1	0.29777	2.5737	0.959235
00000009_6.tif	predator	12.438	20.156	5.42186	8.57989	3.15803	1	0.29777	2.55483	0.940366
00000009_6.tif	predator	12.594	21.036	5.42186	9.38434	3.96248	1	0.29777	2.79437	1.17991
00000009_6.tif	predator	13.661	21.74	5.42186	9.87191	4.45005	1	0.29777	2.93956	1.32509
00000009_6.tif	predator	14.88	20.609	5.42186	8.65631	3.23445	1	0.29777	2.57759	0.963122
00000009_6.tif	predator	16.099	20.656	5.42186	8.77813	3.35627	1	0.29777	2.61386	0.999396
00000009_6.tif	predator	16.266	20.427	5.42186	8.57512	3.15326	1	0.29777	2.55341	0.938946
00000009_6.tif	predator	17.057	19.464	5.42186	7.80012	2.37827	1	0.29777	2.32264	0.708176
00000009_6.tif	predator	16.839	19.432	5.42186	7.71313	2.29128	1	0.29777	2.29674	0.682273
00000009_6.tif	predator	16.688	16.844	5.42186	5.18962	-0.232244	0	0.29777	1.54531	-0.0691552
00000009_6.tif	predator	16.854	16.625	5.42186	5.04395	-0.377914	0	0.29777	1.50194	-0.112531
00000009_6.tif	predator	17	16.51	5.42186	4.99564	-0.426215	0	0.29777	1.48755	-0.126914
00000009_6.tif	predator	16.87	16.38	5.42186	4.82423	-0.597627	0	0.29777	1.43651	-0.177955
00000009_6.tif	predator	17.167	16.734	5.42186	5.26875	-0.153106	0	0.29777	1.56888	-0.0455904
00000009_6.tif	predator	17.615	16.651	5.42186	5.39976	-0.0220953	0	0.29777	1.60789	-0.00657931
00000009_6.tif	predator	17.807	16.271	5.42186	5.17595	-0.245911	0	0.29777	1.54124	-0.0732248
00000009_6.tif	predator	15.526	16.302	5.42186	4.38659	-1.03527	0	0.29777	1.30619	-0.308273
00000009_6.tif	predator	15.583	16.104	5.42186	4.19854	-1.22332	0	0.29777	1.2502	-0.364269
00000009_6.tif	predator	15.828	15.776	5.42186	3.92186	-1.5	0	0.29777	1.16781	-0.446656
00000009_6.tif	predator	16.01	14.609	5.42186	2.8586	-2.56326	0	0.29777	0.851205	-0.763262
00000009_6.tif	predator	15.901	15.281	5.42186	3.46039	-1.96147	0	0.29777	1.0304	-0.584067
00000009_6.tif	predator	15.057	7.786	5.42186	4.1683	-1.25356	0	0.29777	1.24119	-0.373273
00000009_6.tif	predator	15.214	7.625	5.42186	4.33586	-1.086	0	0.29777	1.29109	-0.323377
00000009_6.tif	predator	15.094	6.922	5.42186	5.03298	-0.388884	0	0.29777	1.49867	-0.115798
00000009_6.tif	predator	15.198	6.922	5.42186	5.03696	-0.384897	0	0.29777	1.49986	-0.114611
00000009_6.tif	predator	15.26	7.115	5.42186	4.84773	-0.574128	0	0.29777	1.44351	-0.170958
00000009_6.tif	predator	15.203	5.953	5.42186	6.00521	0.583347	1	0.29777	1.78817	0.173703
00000009_6.tif	predator	15.24	6.047	5.42186	5.91297	0.49111	1	0.29777	1.7607	0.146238
00000009_6.tif	predator	15.458	6.354	5.42186	5.62173	0.199869	1	0.29777	1.67398	0.059515
00000009_6.tif	predator	15.896	6.344	5.42186	5.68772	0.265859	1	0.29777	1.69363	0.0791647
00000009_6.tif	predator	16.047	6.396	5.42186	5.66366	0.241805	1	0.29777	1.68647	0.0720022
00000009_6.tif	predator	15.906	6.594	5.42186	5.44308	0.0212183	1	0.29777	1.62079	0.00631817
00000009_6.tif	predator	15.911	6.87	5.42186	5.17249	-0.249369	0	0.29777	1.54021	-0.0742546
00000009_6.tif	predator	16.427	7.031	5.42186	5.13797	-0.283887	0	0.29777	1.52993	-0.0845329
00000009_6.tif	predator	16.453	6.932	5.42186	5.24027	-0.181588	0	0.29777	1.5604	-0.0540714
00000009_6.tif	predator	16.323	7.49	5.42186	4.66854	-0.753319	0	0.29777	1.39015	-0.224316
00000009_6.tif	predator	16.161	7.63	5.42186	4.48861	-0.933252	0	0.29777	1.33657	-0.277894
00000009_6.tif	predator	16.698	7.146	5.42186	5.11393	-0.30793	0	0.29777	1.52277	-0.0916922
00000009_6.tif	predator	17.37	7.38	5.42186	5.17245	-0.249411	0	0.29777	1.5402	-0.0742671
00000009_6.tif	predator	17.958	8.724	5.42186	4.41095	-1.01091	0	0.29777	1.31345	-0.301019
00000009_6.tif	predator	17.323	4.062	5.42186	8.23922	2.81736	1	0.29777	2.45339	0.838926
00000009_6.tif	predator	16.802	3.438	5.42186	8.71344	3.29158	1	0.29777	2.5946	0.980134
00000009_6.tif	predator	20.047	5.573	5.42186	8.16414	2.74228	1	0.29777	2.43104	0.81657
00000009_6.tif	predator	21.229	6.286	5.42186	8.45595	3.03409	1	0.29777	2.51793	0.903461
00000009_6.tif	predator	19.615	5.776	5.42186	7.73884	2.31698	1	0.29777	2.30439	0.689926
00000009_6.tif	predator	19.615	5.776	5.42186	7.73884	2.31698	1	0.29777	2.30439	0.689926
00000009_6.tif	predator	21.13	6.391	5.42186	8.31211	2.89025	1	0.29777	2.4751	0.86063
00000009_6.tif	predator	18.464	6.953	5.42186	6.10959	0.687734	1	0.29777	1.81925	0.204786
00000009_6.tif	predator	18.557	7.078	5.42186	6.06254	0.640685	1	0.29777	1.80524	0.190777
00000009_6.tif	predator	19.229	7.307	5.42186	6.31423	0.89237	1	0.29777	1.88019	0.265721
00000009_6.tif	predator	19.385	7.411	5.42186	6.34605	0.924194	1	0.29777	1.88966	0.275197
00000009_6.tif	predator	19.896	7.354	5.42186	6.7516	1.32974	1	0.29777	2.01042	0.395956
00000009_6.tif	predator	18.349	8.12	5.42186	5.12101	-0.300853	0	0.29777	1.52488	-0.0895849
00000009_6.tif	predator	18.339	8.271	5.42186	5.00221	-0.419647	0	0.29777	1.48951	-0.124958
00000009_6.tif	predator	18.188	8.641	5.42186	4.62975	-0.792111	0	0.29777	1.3786	-0.235867
00000009_6.tif	predator	19.234	10.427	5.42186	4.54485	-0.877012	0	0.29777	1.35332	-0.261148
00000009_6.tif	predator	19.344	11.396	5.42186	4.42619	-0.995672	0	0.29777	1.31799	-0.296481
00000009_6.tif	predator	19.219	14.375	5.42186	4.90559	-0.516266	0	0.29777	1.46074	-0.153729
00000009_6.tif	predator	19.135	14.708	5.42186	5.00791	-0.41395	0	0.29777	1.4912	-0.123262
00000009_6.tif	predator	18.995	14.672	5.42186	4.87142	-0.55044	0	0.29777	1.45056	-0.163904
00000009_6.tif	predator	18.828	15.068	5.42186	4.97181	-0.450053	0	0.29777	1.48045	-0.134012
00000009_6.tif	predator	19.021	15.193	5.42186	5.2006	-0.221261	0	0.29777	1.54858	-0.0658848
00000009_6.tif	predator	19.411	14.714	5.42186	5.24375	-0.178112	0	0.29777	1.56143	-0.0530363
00000009_6.tif	predator	24.842	12.418	5.42186	9.89993	4.47807	1	0.29777	2.9479	1.33343
00000009_6.tif	predator	24.668	12.543	5.42186	9.7329	4.31104	1	0.29777	2.89817	1.2837
00000000_4.tif	predator	9.345	14.63	5.67716	6.00219	0.325033	1	0.29777	1.78727	0.0967852
00000000_4.tif	predator	4.998	9.304	5.67716	9.57137	3.89421	1	0.29777	2.85007	1.15958
00000000_4.tif	predator	5.47	8.72	5.67716	9.25749	3.58033	1	0.29777	2.7566	1.06611
00000000_4.tif	predator	5.575	8.672	5.67716	9.17053	3.49337	1	0.29777	2.73071	1.04022
00000000_4.tif	predator	5.283	8.227	5.67716	9.58479	3.90763	1	0.29777	2.85406	1.16358
00000000_4.tif	predator	6.332	7.595	5.67716	8.84593	3.16877	1	0.29777	2.63405	0.943564
00000000_4.tif	predator	6.852	9.422	5.67716	7.73911	2.06195	1	0.29777	2.30447	0.613986
00000000_4.tif	predator	7.082	9.13	5.67716	7.59547	1.91831	1	0.29777	2.2617	0.571216
00000000_4.tif	predator	6.852	6.009	5.67716	9.1934	3.51624	1	0.29777	2.73752	1.04703
00000000_4.tif	predator	7.123	15.089	5.67716	8.15292	2.47576	1	0.29777	2.4277	0.737207
00000000_4.tif	predator	6.964	18.429	5.67716	10.2522	4.57503	1	0.29777	3.05279	1.36231
00000000_4.tif	predator	6.79	18.415	5.67716	10.3687	4.69157	1	0.29777	3.0875	1.39701
00000000_4.tif	predator	8.595	15.061	5.67716	6.86576	1.1886	1	0.29777	2.04442	0.353931
00000000_4.tif	predator	8.804	15.012	5.67716	6.66417	0.987014	1	0.29777	1.98439	0.293903
00000000_4.tif	predator	9.255	15.061	5.67716	6.32238	0.645216	1	0.29777	1.88261	0.192126
00000000_4.tif	predator	10.116	13.373	5.67716	4.70777	-0.969385	0	0.29777	1.40183	-0.288654
00000000_4.tif	predator	10.179	10.62	5.67716	4.23377	-1.44339	0	0.29777	1.26069	-0.429797
00000000_4.tif	predator	10.359	6.918	5.67716	5.94677	0.269608	1	0.29777	1.77077	0.0802811
00000000_4.tif	predator	10.873	6.759	5.67716	5.73999	0.0628272	1	0.29777	1.7092	0.0187081
00000000_4.tif	predator	10.755	6.564	5.67716	5.96665	0.289487	1	0.29777	1.77669	0.0862006
00000000_4.tif	predator	10.089	6.613	5.67716	6.35408	0.676919	1	0.29777	1.89205	0.201566
00000000_4.tif	predator	10.095	6.446	5.67716	6.47489	0.79773	1	0.29777	1.92803	0.23754
00000000_4.tif	predator	10.116	6.231	5.67716	6.62489	0.947725	1	0.29777	1.97269	0.282204
00000000_4.tif	predator	10.047	6.155	5.67716	6.72744	1.05028	1	0.29777	2.00323	0.312742
00000000_4.tif	predator	9.887	6.078	5.67716	6.88942	1.21226	1	0.29777	2.05146	0.360975
00000000_4.tif	predator	9.769	5.863	5.67716	7.12978	1.45262	1	0.29777	2.12304	0.432548
00000000_4.tif	predator	7.845	5.005	5.67716	9.07106	3.3939	1	0.29777	2.70109	1.0106
00000000_4.tif	predator	8.936	5.137	5.67716	8.22322	2.54606	1	0.29777	2.44863	0.75814
00000000_4.tif	predator	9.186	4.123	5.67716	8.86274	3.18558	1	0.29777	2.63906	0.948571
00000000_4.tif	predator	12.96	3.46	5.67716	7.98561	2.30845	1	0.29777	2.37788	0.687388
00000000_4.tif	predator	11.259	6.943	5.67716	5.36315	-0.314006	0	0.29777	1.59699	-0.0935015
00000000_4.tif	predator	11.696	6.79	5.67716	5.25481	-0.422348	0	0.29777	1.56473	-0.125763
00000000_4.tif	predator	12.273	6.804	5.67716	4.97513	-0.70203	0	0.29777	1.48144	-0.209043
00000000_4.tif	predator	12.432	6.922	5.67716	4.80238	-0.874777	0	0.29777	1.43001	-0.260482
00000000_4.tif	predator	12.509	6.922	5.67716	4.77209	-0.905072	0	0.29777	1.42098	-0.269503
00000000_4.tif	predator	11.627	7.616	5.67716	4.602	-1.07516	0	0.29777	1.37034	-0.320151
00000000_4.tif	predator	11.814	7.957	5.67716	4.21682	-1.46034	0	0.29777	1.25564	-0.434846
00000000_4.tif	predator	13.106	7.609	5.67716	3.91807	-1.75909	0	0.29777	1.16668	-0.523803
00000000_4.tif	predator	15.786	7.352	5.67716	4.22131	-1.45585	0	0.29777	1.25698	-0.433508
00000000_4.tif	predator	16.266	6.422	5.67716	5.26076	-0.416405	0	0.29777	1.5665	-0.123993
00000000_4.tif	predator	12.321	9.245	5.67716	2.90709	-2.77007	0	0.29777	0.865644	-0.824844
00000000_4.tif	predator	13.418	9.356	5.67716	2.17834	-3.49882	0	0.29777	0.648646	-1.04184
00000000_4.tif	predator	14.043	9.12	5.67716	2.22484	-3.45232	0	0.29777	0.662492	-1.028
00000000_4.tif	predator	14.96	11.557	5.67716	0.649609	-5.02755	0	0.29777	0.193434	-1.49705
00000000_4.tif	predator	14.293	11.62	5.67716	0.3032	-5.37396	0	0.29777	0.0902837	-1.6002
00000000_4.tif	predator	13.724	14.46	5.67716	3.19964	-2.47752	0	0.29777	0.952756	-0.737732
00000000_4.tif	predator	13.655	14.682	5.67716	3.43096	-2.2462	0	0.29777	1.02164	-0.668851
00000000_4.tif	predator	13.606	14.821	5.67716	3.57708	-2.10008	0	0.29777	1.06515	-0.625341
00000000_4.tif	predator	13.814	15.002	5.67716	3.71842	-1.95874	0	0.29777	1.10723	-0.583254
00000000_4.tif	predator	12.342	16.349	5.67716	5.41376	-0.263398	0	0.29777	1.61206	-0.0784321
00000000_4.tif	predator	12.87	16.356	5.67716	5.24722	-0.429938	0	0.29777	1.56247	-0.128023
00000000_4.tif	predator	13.002	16.516	5.67716	5.36611	-0.311049	0	0.29777	1.59787	-0.092621
00000000_4.tif	predator	13.273	16.363	5.67716	5.15463	-0.522535	0	0.29777	1.53489	-0.155595
00000000_4.tif	predator	16.134	20.113	5.67716	8.96842	3.29126	1	0.29777	2.67053	0.980037
00000000_4.tif	predator	16.318	17.276	5.67716	6.26861	0.591452	1	0.29777	1.8666	0.176117
00000000_4.tif	predator	16.637	16.137	5.67716	5.32792	-0.349245	0	0.29777	1.58649	-0.103995
00000000_4.tif	predator	16.679	16.061	5.67716	5.27771	-0.399446	0	0.29777	1.57155	-0.118943
00000000_4.tif	predator	16.859	15.964	5.67716	5.27389	-0.403271	0	0.29777	1.57041	-0.120082
00000000_4.tif	predator	16.568	15.748	5.67716	4.94797	-0.729189	0	0.29777	1.47336	-0.217131
00000000_4.tif	predator	16.408	6.464	5.67716	5.2753	-0.40186	0	0.29777	1.57083	-0.119662
00000000_4.tif	predator	18.373	4.946	5.67716	7.5378	1.86064	1	0.29777	2.24453	0.554044
00000000_4.tif	predator	18.123	5.655	5.67716	6.80673	1.12957	1	0.29777	2.02684	0.336352
00000000_4.tif	predator	20.047	5.592	5.67716	8.07803	2.40087	1	0.29777	2.4054	0.714908
00000000_4.tif	predator	21.151	12.005	5.67716	6.83113	1.15397	1	0.29777	2.03411	0.343617
00000000_4.tif	predator	21.283	11.97	5.67716	6.95914	1.28198	1	0.29777	2.07222	0.381736
00000000_4.tif	predator	22.102	12.214	5.67716	7.79906	2.1219	1	0.29777	2.32233	0.631839
00000000_4.tif	predator	22.109	13.047	5.67716	7.94432	2.26716	1	0.29777	2.36558	0.675092
00000000_4.tif	predator	23.186	12.783	5.67716	8.95186	3.2747	1	0.29777	2.6656	0.975108
00000000_4.tif	predator	23.276	12.519	5.67716	9.00181	3.32465	1	0.29777	2.68047	0.98998
00000000_4.tif	predator	21.47	15.939	5.67716	8.48203	2.80487	1	0.29777	2.5257	0.835207
00000000_4.tif	predator	21.248	16.411	5.67716	8.56825	2.89109	1	0.29777	2.55137	0.860881
00000000_4.tif	predator	20.811	16.898	5.67716	8.53074	2.85358	1	0.29777	2.5402	0.84971
00000000_4.tif	predator	23.911	9.28	5.67716	9.77293	4.09577	1	0.29777	2.91008	1.2196
00000000_4.tif	predator	23.661	10.793	5.67716	9.32208	3.64492	1	0.29777	2.77584	1.08535
00000000_4.tif	predator	23.731	10.807	5.67716	9.39119	3.71403	1	0.29777	2.79641	1.10593
00000000_4.tif	predator	23.884	10.842	5.67716	9.54213	3.86497	1	0.29777	2.84136	1.15087
00000000_4.tif	predator	23.849	10.905	5.67716	9.5042	3.82704	1	0.29777	2.83006	1.13958
00000000_4.tif	predator	23.627	12.863	5.67716	9.40001	3.72285	1	0.29777	2.79904	1.10855
00000000_4.tif	predator	23.575	15.443	5.67716	10.0996	4.42241	1	0.29777	3.00735	1.31686
00000000_4.tif	predator	23.547	15.63	5.67716	10.1519	4.47476	1	0.29777	3.02294	1.33245
00000000_5.tif	predator	8.762	11.432	5.82305	6.37937	0.556319	1	0.29777	1.89959	0.165655
00000000_5.tif	predator	7.484	6.665	5.82305	8.59303	2.76998	1	0.29777	2.55875	0.824816
00000000_5.tif	predator	6.436	7.214	5.82305	9.3171	3.49404	1	0.29777	2.77435	1.04042
00000000_5.tif	predator	6.658	7.352	5.82305	9.05994	3.23689	1	0.29777	2.69778	0.963847
00000000_5.tif	predator	6.63	7.436	5.82305	9.05581	3.23276	1	0.29777	2.69655	0.962618
00000000_5.tif	predator	6.644	7.595	5.82305	8.98734	3.16428	1	0.29777	2.67616	0.942228
00000000_5.tif	predator	6.491	8.095	5.82305	8.9761	3.15304	1	0.29777	2.67281	0.938882
00000000_5.tif	predator	6.72	8.366	5.82305	8.68147	2.85842	1	0.29777	2.58508	0.851151
00000000_5.tif	predator	5.443	9.589	5.82305	9.7098	3.88675	1	0.29777	2.89129	1.15736
00000000_5.tif	predator	6.672	11.109	5.82305	8.43417	2.61112	1	0.29777	2.51144	0.777513
00000000_5.tif	predator	8.734	11.026	5.82305	6.37075	0.547699	1	0.29777	1.89702	0.163088
00000000_5.tif	predator	5.089	11.432	5.82305	10.035	4.21199	1	0.29777	2.98814	1.25421
00000000_5.tif	predator	5.172	12.168	5.82305	10.0365	4.21349	1	0.29777	2.98858	1.25465
00000000_5.tif	predator	5.415	12.509	5.82305	9.85478	4.03172	1	0.29777	2.93446	1.20053
00000000_5.tif	predator	6.04	11.564	5.82305	9.09942	3.27636	1	0.29777	2.70953	0.975602
00000000_5.tif	predator	5.727	12.634	5.82305	9.57357	3.75051	1	0.29777	2.85072	1.11679
00000000_5.tif	predator	6.109	13.293	5.82305	9.36397	3.54092	1	0.29777	2.78831	1.05438
00000000_5.tif	predator	6.464	12.905	5.82305	8.91823	3.09518	1	0.29777	2.65558	0.921652
00000000_5.tif	predator	6.54	12.613	5.82305	8.77501	2.95195	1	0.29777	2.61293	0.879003
00000000_5.tif	predator	6.554	11.891	5.82305	8.62884	2.80578	1	0.29777	2.56941	0.835478
00000000_5.tif	predator	6.693	11.766	5.82305	8.47401	2.65096	1	0.29777	2.52331	0.789376
00000000_5.tif	predator	6.748	11.661	5.82305	8.40629	2.58324	1	0.29777	2.50314	0.769211
00000000_5.tif	predator	7.859	11.821	5.82305	7.3282	1.50514	1	0.29777	2.18212	0.448186
00000000_5.tif	predator	8.089	11.828	5.82305	7.10237	1.27931	1	0.29777	2.11487	0.380941
00000000_5.tif	predator	8.012	11.37	5.82305	7.1179	1.29485	1	0.29777	2.1195	0.385567
00000000_5.tif	predator	7.727	14.3	5.82305	8.21897	2.39591	1	0.29777	2.44736	0.713431
00000000_5.tif	predator	7.984	14.793	5.82305	8.22599	2.40293	1	0.29777	2.44945	0.715521
00000000_5.tif	predator	8.922	14.96	5.82305	7.52449	1.70144	1	0.29777	2.24057	0.506638
00000000_5.tif	predator	9.325	18.714	5.82305	9.91023	4.08718	1	0.29777	2.95097	1.21704
00000000_5.tif	predator	9.262	16.276	5.82305	8.09917	2.27612	1	0.29777	2.41169	0.67776
00000000_5.tif	predator	9.276	16.089	5.82305	7.96031	2.13726	1	0.29777	2.37034	0.636412
00000000_5.tif	predator	10.415	17.13	5.82305	7.98785	2.16479	1	0.29777	2.37854	0.644611
00000000_5.tif	predator	10.776	17.269	5.82305	7.8979	2.07485	1	0.29777	2.35176	0.617828
00000000_5.tif	predator	10.082	16.436	5.82305	7.6504	1.82734	1	0.29777	2.27806	0.544127
00000000_5.tif	predator	10.352	16.318	5.82305	7.38545	1.56239	1	0.29777	2.19916	0.465233
00000000_5.tif	predator	10.512	16.255	5.82305	7.23488	1.41183	1	0.29777	2.15433	0.4204
00000000_5.tif	predator	10.582	15.95	5.82305	6.9559	1.13285	1	0.29777	2.07126	0.337328
00000000_5.tif	predator	11.436	15.679	5.82305	6.21381	0.39076	1	0.29777	1.85029	0.116357
00000000_5.tif	predator	10.651	15.283	5.82305	6.41478	0.591724	1	0.29777	1.91013	0.176198
00000000_5.tif	predator	10.241	14.332	5.82305	6.08807	0.265015	1	0.29777	1.81284	0.0789135
00000000_5.tif	predator	10.297	14.22	5.82305	5.97606	0.153007	1	0.29777	1.77949	0.0455608
00000000_5.tif	predator	10.915	13.95	5.82305	5.32113	-0.501919	0	0.29777	1.58447	-0.149457
00000000_5.tif	predator	10.477	13.637	5.82305	5.49573	-0.327324	0	0.29777	1.63646	-0.0974673
00000000_5.tif	predator	11.839	12.839	5.82305	3.91925	-1.90381	0	0.29777	1.16703	-0.566896
00000000_5.tif	predator	11.2	12.783	5.82305	4.43704	-1.38601	0	0.29777	1.32122	-0.412712
00000000_5.tif	predator	11.04	4.63	5.82305	7.26275	1.4397	1	0.29777	2.16263	0.428699
00000000_5.tif	predator	10.373	3.373	5.82305	8.67928	2.85623	1	0.29777	2.58443	0.850499
00000000_5.tif	predator	15.457	0.835	5.82305	9.82771	4.00465	1	0.29777	2.9264	1.19247
00000000_5.tif	predator	16.089	1.752	5.82305	8.95942	3.13637	1	0.29777	2.66785	0.933916
00000000_5.tif	predator	13.72	2.148	5.82305	8.61823	2.79518	1	0.29777	2.56625	0.83232
00000000_5.tif	predator	14.866	2.606	5.82305	8.05323	2.23017	1	0.29777	2.39801	0.664079
00000000_5.tif	predator	15.387	3.564	5.82305	7.09805	1.275	1	0.29777	2.11359	0.379655
00000000_5.tif	predator	13.193	10.352	5.82305	1.92515	-3.8979	0	0.29777	0.573253	-1.16068
00000000_5.tif	predator	11.984	15.109	5.82305	5.43151	-0.391543	0	0.29777	1.61734	-0.11659
00000000_5.tif	predator	12.748	16.269	5.82305	6.08354	0.260488	1	0.29777	1.8115	0.0775655
00000000_5.tif	predator	13.72	18.571	5.82305	8.03337	2.21032	1	0.29777	2.3921	0.658167
00000000_5.tif	predator	13.894	18.731	5.82305	8.16368	2.34062	1	0.29777	2.4309	0.696967
00000000_5.tif	predator	14.804	19.495	5.82305	8.84376	3.0207	1	0.29777	2.63341	0.899474
00000000_5.tif	predator	16.436	18.793	5.82305	8.24692	2.42387	1	0.29777	2.45569	0.721755
00000000_5.tif	predator	16.609	17.613	5.82305	7.12005	1.29699	1	0.29777	2.12014	0.386206
00000000_5.tif	predator	14.005	19.821	5.82305	9.22947	3.40642	1	0.29777	2.74826	1.01433
00000000_5.tif	predator	13.568	20.016	5.82305	9.48358	3.66053	1	0.29777	2.82393	1.08999
00000000_5.tif	predator	13.623	20.21	5.82305	9.66658	3.84353	1	0.29777	2.87842	1.14449
00000000_5.tif	predator	13.644	20.55	5.82305	9.99969	4.17663	1	0.29777	2.97761	1.24368
00000000_5.tif	predator	13.693	20.543	5.82305	9.98577	4.16271	1	0.29777	2.97346	1.23953
00000000_5.tif	predator	20.727	19.998	5.82305	10.9089	5.08583	1	0.29777	3.24834	1.51441
00000000_5.tif	predator	20.693	19.915	5.82305	10.8203	4.9972	1	0.29777	3.22195	1.48802
00000000_5.tif	predator	17.79	18.446	5.82305	8.24333	2.42028	1	0.29777	2.45462	0.720686
00000000_5.tif	predator	17.554	16.828	5.82305	6.64418	0.82113	1	0.29777	1.97844	0.244508
00000000_5.tif	predator	20.075	16.752	5.82305	7.8722	2.04915	1	0.29777	2.34411	0.610175
00000000_5.tif	predator	20.568	16.411	5.82305	7.94259	2.11953	1	0.29777	2.36506	0.631134
00000000_5.tif	predator	20.151	15.835	5.82305	7.23846	1.4154	1	0.29777	2.1554	0.421465
00000000_5.tif	predator	20.054	15.38	5.82305	6.84966	1.0266	1	0.29777	2.03962	0.305691
00000000_5.tif	predator	21.227	14.408	5.82305	7.18966	1.3666	1	0.29777	2.14086	0.406934
00000000_5.tif	predator	21.172	13.922	5.82305	6.89992	1.07686	1	0.29777	2.05459	0.320657
00000000_5.tif	predator	20.762	13.776	5.82305	6.46998	0.646924	1	0.29777	1.92657	0.192635
00000000_5.tif	predator	20.519	13.825	5.82305	6.28277	0.459715	1	0.29777	1.87082	0.136889
00000000_5.tif	predator	21.894	13.693	5.82305	7.44737	1.62432	1	0.29777	2.2176	0.483673
00000000_5.tif	predator	21.644	13.408	5.82305	7.10465	1.28159	1	0.29777	2.11555	0.38162
00000000_5.tif	predator	19.047	11.151	5.82305	3.98387	-1.83918	0	0.29777	1.18628	-0.547653
00000000_5.tif	predator	19.457	10.741	5.82305	4.36383	-1.45923	0	0.29777	1.29942	-0.434514
00000000_5.tif	predator	20.387	10.832	5.82305	5.29593	-0.527129	0	0.29777	1.57697	-0.156963
00000000_5.tif	predator	21.832	9.866	5.82305	6.78415	0.9611	1	0.29777	2.02012	0.286187
00000000_5.tif	predator	21.623	7.946	5.82305	7.06908	1.24603	1	0.29777	2.10496	0.37103
00000000_5.tif	predator	17.464	3.005	5.82305	8.00966	2.18661	1	0.29777	2.38504	0.651106
00000000_5.tif	predator	18.714	2.116	5.82305	9.27556	3.45251	1	0.29777	2.76198	1.02805
00000000_5.tif	predator	18.561	1.693	5.82305	9.61017	3.78712	1	0.29777	2.86162	1.12769
00000000_5.tif	predator	22.297	4.54	5.82305	9.44927	3.62621	1	0.29777	2.81371	1.07978
00000000_5.tif	predator	24.38	7.821	5.82305	9.70912	3.88607	1	0.29777	2.89108	1.15715
00000000_5.tif	predator	24.123	7.731	5.82305	9.49097	3.66791	1	0.29777	2.82613	1.09219
00000000_5.tif	predator	22.241	9.467	5.82305	7.24523	1.42217	1	0.29777	2.15741	0.423481
00000000_5.tif	predator	22.526	9.349	5.82305	7.54605	1.723	1	0.29777	2.24699	0.513056
00000000_5.tif	predator	23.332	10.578	5.82305	8.23837	2.41532	1	0.29777	2.45314	0.719208
00000000_5.tif	predator	24.901	10.717	5.82305	9.80719	3.98414	1	0.29777	2.92029	1.18636
00000000_5.tif	predator	24.852	10.668	5.82305	9.75801	3.93495	1	0.29777	2.90564	1.17171
00000000_5.tif	predator	23.658	11.352	5.82305	8.59224	2.76918	1	0.29777	2.55851	0.824579
00000000_5.tif	predator	23.276	11.665	5.82305	8.24398	2.42093	1	0.29777	2.45481	0.720879
00000000_5.tif	predator	22.63	12.075	5.82305	7.66843	1.84538	1	0.29777	2.28343	0.549498
00000000_5.tif	predator	22.575	12.29	5.82305	7.65737	1.83432	1	0.29777	2.28014	0.546204
00000000_5.tif	predator	22.359	16.627	5.82305	9.40389	3.58083	1	0.29777	2.8002	1.06626
00000000_5.tif	predator	22.297	16.648	5.82305	9.36949	3.54643	1	0.29777	2.78995	1.05602
00000000_5.tif	predator	23.241	17.234	5.82305	10.4711	4.64803	1	0.29777	3.11798	1.38405
00000000_5.tif	predator	23.401	17.616	5.82305	10.8373	5.01428	1	0.29777	3.22703	1.4931
00000000_6.tif	predator	5.839	8.481	5.73429	10.3166	4.58228	1	0.29777	3.07196	1.36446
00000000_6.tif	predator	7.269	8.363	5.73429	8.95608	3.22179	1	0.29777	2.66685	0.959353
00000000_6.tif	predator	6.762	12.415	5.73429	9.30578	3.5715	1	0.29777	2.77098	1.06348
00000000_6.tif	predator	6.741	12.54	5.73429	9.35004	3.61575	1	0.29777	2.78416	1.07666
00000000_6.tif	predator	5.04	13.352	5.73429	11.1865	5.45221	1	0.29777	3.331	1.6235
00000000_6.tif	predator	5.887	15.807	5.73429	11.2436	5.50934	1	0.29777	3.34802	1.64052
00000000_6.tif	predator	8.036	18.609	5.73429	11.1511	5.4168	1	0.29777	3.32046	1.61296
00000000_6.tif	predator	8.064	16.648	5.73429	9.83808	4.10379	1	0.29777	2.92948	1.22199
00000000_6.tif	predator	11.03	17.78	5.73429	8.58793	2.85364	1	0.29777	2.55723	0.849729
00000000_6.tif	predator	12.328	17.016	5.73429	7.24935	1.51506	1	0.29777	2.15864	0.451141
00000000_6.tif	predator	11.245	16.349	5.73429	7.31606	1.58178	1	0.29777	2.1785	0.471005
00000000_6.tif	predator	11.134	16.286	5.73429	7.33941	1.60512	1	0.29777	2.18546	0.477957
00000000_6.tif	predator	10.773	16.203	5.73429	7.51852	1.78423	1	0.29777	2.23879	0.531291
00000000_6.tif	predator	9.78	14.821	5.73429	7.37947	1.64519	1	0.29777	2.19739	0.489887
00000000_6.tif	predator	11.439	14.856	5.73429	6.09549	0.361199	1	0.29777	1.81505	0.107554
00000000_6.tif	predator	8.509	12.901	5.73429	7.71833	1.98404	1	0.29777	2.29829	0.590788
00000000_6.tif	predator	8.286	12.811	5.73429	7.9081	2.17381	1	0.29777	2.35479	0.647296
00000000_6.tif	predator	8.182	10.227	5.73429	7.74433	2.01004	1	0.29777	2.30603	0.59853
00000000_6.tif	predator	8.432	10.033	5.73429	7.50994	1.77565	1	0.29777	2.23623	0.528736
00000000_6.tif	predator	7.925	8.616	5.73429	8.25698	2.5227	1	0.29777	2.45868	0.751184
00000000_6.tif	predator	7.891	8.436	5.73429	8.33725	2.60296	1	0.29777	2.48258	0.775083
00000000_6.tif	predator	8.856	10.248	5.73429	7.07037	1.33609	1	0.29777	2.10535	0.397846
00000000_6.tif	predator	9.821	9.505	5.73429	6.20885	0.47456	1	0.29777	1.84881	0.14131
00000000_6.tif	predator	10.05	9.491	5.73429	5.98724	0.252954	1	0.29777	1.78282	0.075322
00000000_6.tif	predator	11.578	10.38	5.73429	4.34585	-1.38843	0	0.29777	1.29406	-0.413434
00000000_6.tif	predator	11.543	10.283	5.73429	4.38921	-1.34507	0	0.29777	1.30698	-0.400523
00000000_6.tif	predator	11.856	5.53	5.73429	6.58156	0.847269	1	0.29777	1.95979	0.252291
00000000_6.tif	predator	8.974	4.762	5.73429	9.14047	3.40619	1	0.29777	2.72176	1.01426
00000000_6.tif	predator	10.349	4.72	5.73429	8.17703	2.44275	1	0.29777	2.43488	0.727377
00000000_6.tif	predator	11.432	4.582	5.73429	7.59361	1.85932	1	0.29777	2.26115	0.55365
00000000_6.tif	predator	10.231	2.259	5.73429	10.1857	4.45146	1	0.29777	3.03301	1.32551
00000000_6.tif	predator	10.036	2.259	5.73429	10.2958	4.56147	1	0.29777	3.06577	1.35827
00000000_6.tif	predator	11.918	1.988	5.73429	9.5962	3.86192	1	0.29777	2.85746	1.14996
00000000_6.tif	predator	12.238	1.96	5.73429	9.49334	3.75905	1	0.29777	2.82683	1.11933
00000000_6.tif	predator	14.373	1.967	5.73429	8.88119	3.1469	1	0.29777	2.64455	0.937052
00000000_6.tif	predator	15.047	3.398	5.73429	7.36684	1.63255	1	0.29777	2.19362	0.486126
00000000_6.tif	predator	15.047	3.543	5.73429	7.22286	1.48858	1	0.29777	2.15075	0.443253
00000000_6.tif	predator	15.748	4.682	5.73429	6.0342	0.299915	1	0.29777	1.7968	0.0893057
00000000_6.tif	predator	16.137	5.495	5.73429	5.22389	-0.510396	0	0.29777	1.55552	-0.151981
00000000_6.tif	predator	15.165	8.339	5.73429	2.48941	-3.24488	0	0.29777	0.74127	-0.966228
00000000_6.tif	predator	14.839	8.727	5.73429	2.25773	-3.47656	0	0.29777	0.672285	-1.03521
00000000_6.tif	predator	14.464	8.901	5.73429	2.31965	-3.41464	0	0.29777	0.690722	-1.01678
00000000_6.tif	predator	17.29	8.894	5.73429	2.28343	-3.45086	0	0.29777	0.679936	-1.02756
00000000_6.tif	predator	18.172	7.852	5.73429	3.64735	-2.08694	0	0.29777	1.08607	-0.621427
00000000_6.tif	predator	18.325	9.373	5.73429	2.76146	-2.97282	0	0.29777	0.822281	-0.885218
00000000_6.tif	predator	15.068	12.439	5.73429	1.91997	-3.81432	0	0.29777	0.571709	-1.13579
00000000_6.tif	predator	13.943	13.835	5.73429	3.68967	-2.04462	0	0.29777	1.09867	-0.608826
00000000_6.tif	predator	13.672	14.661	5.73429	4.53783	-1.19645	0	0.29777	1.35123	-0.356268
00000000_6.tif	predator	13.755	14.655	5.73429	4.4922	-1.24209	0	0.29777	1.33764	-0.369858
00000000_6.tif	predator	16.075	14.182	5.73429	3.47188	-2.26241	0	0.29777	1.03382	-0.673678
00000000_6.tif	predator	16.408	14.314	5.73429	3.63414	-2.10014	0	0.29777	1.08214	-0.625359
00000000_6.tif	predator	16.387	14.863	5.73429	4.17622	-1.55807	0	0.29777	1.24355	-0.463947
00000000_6.tif	predator	16.276	14.911	5.73429	4.21284	-1.52145	0	0.29777	1.25446	-0.453041
00000000_6.tif	predator	16.297	15.148	5.73429	4.45077	-1.28352	0	0.29777	1.32531	-0.382193
00000000_6.tif	predator	17.526	14.502	5.73429	4.11791	-1.61638	0	0.29777	1.22619	-0.481309
00000000_6.tif	predator	18.679	15.144	5.73429	5.22367	-0.510617	0	0.29777	1.55545	-0.152047
00000000_6.tif	predator	18.977	15.429	5.73429	5.6242	-0.110091	0	0.29777	1.67472	-0.0327818
00000000_6.tif	predator	18.991	14.936	5.73429	5.22606	-0.508229	0	0.29777	1.55616	-0.151335
00000000_6.tif	predator	17.887	15.575	5.73429	5.24728	-0.487012	0	0.29777	1.56248	-0.145018
00000000_6.tif	predator	17.936	15.755	5.73429	5.43252	-0.301764	0	0.29777	1.61764	-0.0898563
00000000_6.tif	predator	18.172	15.873	5.73429	5.63271	-0.101579	0	0.29777	1.67725	-0.0302471
00000000_6.tif	predator	13.887	15.852	5.73429	5.52228	-0.212003	0	0.29777	1.64437	-0.0631282
00000000_6.tif	predator	14.102	16.193	5.73429	5.76992	0.0356282	1	0.29777	1.71811	0.010609
00000000_6.tif	predator	13.693	16.922	5.73429	6.59233	0.858041	1	0.29777	1.963	0.255499
00000000_6.tif	predator	14.783	16.068	5.73429	5.47154	-0.262752	0	0.29777	1.62926	-0.0782395
00000000_6.tif	predator	13.762	18.828	5.73429	8.39376	2.65947	1	0.29777	2.49941	0.791911
00000000_6.tif	predator	13.089	19.405	5.73429	9.13768	3.40339	1	0.29777	2.72093	1.01343
00000000_6.tif	predator	14.54	18.432	5.73429	7.83882	2.10454	1	0.29777	2.33417	0.626668
00000000_6.tif	predator	16.248	18.259	5.73429	7.55252	1.81824	1	0.29777	2.24891	0.541416
00000000_6.tif	predator	16.595	18.043	5.73429	7.36085	1.62656	1	0.29777	2.19184	0.484341
00000000_6.tif	predator	16.54	17.974	5.73429	7.2872	1.55291	1	0.29777	2.16991	0.46241
00000000_6.tif	predator	17.443	19.502	5.73429	8.92054	3.18625	1	0.29777	2.65627	0.948769
[truncated: 5,277 more rows]
