# Supplementary material for: Dopamine signaling regulates predator-driven changes in Caenorhabditis elegans’ egg laying behavior
Source: eLife. 2023 Jul 11;12:e83957. doi: 10.7554/eLife.83957 (PMC10335835; doi:10.7554/eLife.83957)
Supplement: Figure 4—source data 1. — For each test arena, data tabulate the arena, condition, <x,y> coordinates in pixels, the egg distance from arena center in pixels, the conversion factor for pixel data in mm-per-pixel, the calculated distance from center in mm, time in hr. [file elife-83957-fig4-data1.xlsx]

## Sheet: Figure4B-C
Arena	Condition	X	Y	DistCenterPx	PxScale	DistCenterMm	t
00000019_1.tif	control	4.854	12.448	9.89568	0.29777	2.94664	1
00000019_1.tif	control	5.102	12.366	9.64077	0.29777	2.87073	1
00000019_1.tif	control	7.915	13.936	7.22835	0.29777	2.15239	1
00000019_1.tif	control	8.207	5.509	8.79125	0.29777	2.61777	1
00000019_1.tif	control	10.283	3.957	8.68663	0.29777	2.58662	1
00000019_1.tif	control	10.894	3.45	8.84752	0.29777	2.63453	1
00000019_1.tif	control	10.832	3.318	8.99335	0.29777	2.67795	1
00000019_1.tif	control	10.977	3.179	9.05853	0.29777	2.69736	1
00000019_1.tif	control	14.068	7.273	4.21238	0.29777	1.25432	1
00000019_1.tif	control	14.116	7.21	4.26787	0.29777	1.27084	1
00000019_1.tif	control	15.568	13.644	2.37136	0.29777	0.706119	1
00000019_1.tif	control	14.797	16.04	4.60306	0.29777	1.37065	1
00000019_1.tif	control	14.797	16.04	4.60306	0.29777	1.37065	1
00000019_1.tif	control	14.901	16.102	4.66842	0.29777	1.39011	1
00000019_1.tif	control	18.13	16.807	6.37219	0.29777	1.89745	1
00000019_1.tif	control	19.318	16.793	7.07251	0.29777	2.10598	1
00000019_1.tif	control	20.366	16.342	7.49503	0.29777	2.23179	1
00000019_1.tif	control	18.484	14.932	5.15188	0.29777	1.53407	1
00000019_1.tif	control	20.741	13.37	6.34433	0.29777	1.88915	1
00000019_1.tif	control	17.554	7.745	4.66851	0.29777	1.39014	1
00000019_1.tif	control	17.54	7.655	4.7316	0.29777	1.40893	1
00000019_1.tif	control	19.283	5.488	7.51164	0.29777	2.23674	1
00000022_4.tif	predator	21.833	15.302	9.5595	0.29777	2.84653	1
00000022_4.tif	predator	22.495	14.332	9.82467	0.29777	2.92549	1
00000022_4.tif	predator	21.648	7.429	9.34675	0.29777	2.78318	1
00000022_4.tif	predator	20.974	6.13	9.3878	0.29777	2.7954	1
00000022_4.tif	predator	20.766	6.047	9.262	0.29777	2.75795	1
00000022_4.tif	predator	19.665	4.981	9.08729	0.29777	2.70592	1
00000022_4.tif	predator	17.387	3.55	8.84504	0.29777	2.63379	1
00000028_4.tif	control	11.854	20.771	9.86676	0.29777	2.93803	1
00000028_4.tif	control	13.502	20.644	9.39742	0.29777	2.79827	1
00000028_4.tif	control	12.425	18.977	7.98438	0.29777	2.37751	1
00000028_4.tif	control	12.974	17.328	6.24758	0.29777	1.86034	1
00000028_4.tif	control	13.516	10.832	1.27992	0.29777	0.381123	1
00000028_4.tif	control	13.842	12.262	1.27061	0.29777	0.37835	1
00000028_4.tif	control	13.696	12.137	1.29097	0.29777	0.384412	1
00000028_4.tif	control	16.679	5.849	5.82143	0.29777	1.73345	1
00000028_4.tif	control	16.79	5.786	5.91902	0.29777	1.76251	1
00000028_4.tif	control	17.748	7.036	5.26126	0.29777	1.56665	1
00000028_4.tif	control	17.727	7.127	5.17506	0.29777	1.54098	1
00000028_4.tif	control	15.457	10.519	1.10567	0.29777	0.329234	1
00000028_4.tif	control	16.248	11.123	1.56285	0.29777	0.46537	1
00000028_4.tif	control	16.359	11.297	1.6612	0.29777	0.494657	1
00000028_4.tif	control	16.915	12.231	2.39574	0.29777	0.713378	1
00000028_4.tif	control	15.818	19.842	8.59231	0.29777	2.55853	1
00000028_4.tif	control	15.964	19.759	8.53047	0.29777	2.54012	1
00000028_4.tif	control	16.033	20.043	8.8216	0.29777	2.62681	1
00000028_4.tif	control	23.516	6.266	10.1652	0.29777	3.02688	1
00000028_4.tif	control	24.505	9.682	9.94335	0.29777	2.96083	1
0000003_22.tif	predator	9.958	18.312	9.02707	0.29777	2.68799	2
0000003_22.tif	predator	8.665	17.276	9.25024	0.29777	2.75445	2
0000003_22.tif	predator	8.45	17.193	9.36917	0.29777	2.78986	2
0000003_22.tif	predator	7.707	15.991	9.34033	0.29777	2.78127	2
0000003_22.tif	predator	8.109	14.821	8.46925	0.29777	2.52189	2
0000003_22.tif	predator	8.137	14.731	8.40875	0.29777	2.50387	2
0000003_22.tif	predator	7.2	11.634	8.71167	0.29777	2.59407	2
0000003_22.tif	predator	7.068	10.609	8.89042	0.29777	2.6473	2
0000003_22.tif	predator	6.554	9.238	9.63267	0.29777	2.86832	2
0000003_22.tif	predator	7.019	8.113	9.52451	0.29777	2.83611	2
0000003_22.tif	predator	10.866	2.686	10.1783	0.29777	3.03079	2
0000003_22.tif	predator	11.95	2.429	9.92194	0.29777	2.95446	2
0000003_22.tif	predator	11.082	5.411	7.79182	0.29777	2.32017	2
0000003_22.tif	predator	11.033	5.509	7.74591	0.29777	2.3065	2
0000003_22.tif	predator	13.345	7.141	5.08061	0.29777	1.51285	2
0000003_22.tif	predator	13.158	7.224	5.10747	0.29777	1.52085	2
0000003_22.tif	predator	12.089	19.717	9.03881	0.29777	2.69149	2
0000003_22.tif	predator	17.22	14.026	2.82196	0.29777	0.840296	2
0000003_22.tif	predator	17.436	8.155	3.6999	0.29777	1.10172	2
0000003_22.tif	predator	17.464	8.03	3.82542	0.29777	1.13909	2
0000003_22.tif	predator	23.036	8.089	7.91066	0.29777	2.35556	2
0000003_22.tif	predator	23.141	8.089	8.00537	0.29777	2.38376	2
00000037_2.tif	control	6.083	8.448	7.64929	0.29777	2.27773	1
00000037_2.tif	control	6.186	8.398	7.5675	0.29777	2.25337	1
00000037_2.tif	control	6.186	9.523	7.28289	0.29777	2.16862	1
00000037_2.tif	control	6.033	11.092	7.32037	0.29777	2.17979	1
00000037_2.tif	control	6.79	12.45	6.75395	0.29777	2.01112	1
00000037_2.tif	control	18.269	17.276	8.10194	0.29777	2.41251	1
00000037_2.tif	control	18.477	17.332	8.27378	0.29777	2.46368	1
00000037_6.tif	control	8.583	5.76	8.86122	0.29777	2.63861	1
00000037_6.tif	control	8.193	6.214	8.90481	0.29777	2.65158	1
00000037_6.tif	control	7.95	6.359	9.02632	0.29777	2.68777	1
00000037_6.tif	control	8.193	6.724	8.6257	0.29777	2.56847	1
00000037_6.tif	control	8.161	6.865	8.57975	0.29777	2.55479	1
00000037_6.tif	control	8.432	7.125	8.21418	0.29777	2.44594	1
00000037_6.tif	control	8.432	7.26	8.14695	0.29777	2.42592	1
00000037_6.tif	control	8.578	7.26	8.02015	0.29777	2.38816	1
00000037_6.tif	control	9.427	8.349	6.76067	0.29777	2.01313	1
00000037_6.tif	control	9.266	8.427	6.87368	0.29777	2.04678	1
00000037_6.tif	control	9.016	8.49	7.07717	0.29777	2.10737	1
00000037_6.tif	control	7.974	10.906	7.56058	0.29777	2.25131	1
00000037_6.tif	control	8.24	12.219	7.34806	0.29777	2.18803	1
00000037_6.tif	control	7.745	15.182	8.71086	0.29777	2.59383	1
00000037_6.tif	control	7.594	15.208	8.85754	0.29777	2.63751	1
00000037_6.tif	control	10.536	11.031	4.99553	0.29777	1.48752	1
00000037_6.tif	control	12.474	9.516	3.51813	0.29777	1.04759	1
00000037_6.tif	control	11.557	5.385	7.09501	0.29777	2.11268	1
00000037_6.tif	control	11.401	5.307	7.24743	0.29777	2.15807	1
00000037_6.tif	control	13.894	3.102	8.32552	0.29777	2.47909	1
00000037_6.tif	control	13.863	3.182	8.25328	0.29777	2.45758	1
00000037_6.tif	control	13.811	5.582	5.93709	0.29777	1.76789	1
00000037_6.tif	control	13.405	10.797	2.17223	0.29777	0.646826	1
00000037_6.tif	control	15.766	6.453	4.81898	0.29777	1.43495	1
00000037_6.tif	control	23.083	12.302	7.62768	0.29777	2.2713	1
00000037_6.tif	control	23.151	10.531	7.66034	0.29777	2.28102	1
00000037_6.tif	control	22.464	10.12	7.03201	0.29777	2.09392	1
00000039_2.tif	control	11.615	11.854	2.51319	0.29777	0.748353	1
00000039_2.tif	control	11.693	11.759	2.41674	0.29777	0.719633	1
00000039_2.tif	control	12.852	6.731	4.70814	0.29777	1.40194	1
00000039_2.tif	control	12.887	6.641	4.78646	0.29777	1.42526	1
00000039_2.tif	control	11.922	3.325	8.23878	0.29777	2.45326	1
00000039_2.tif	control	13.557	2.589	8.70666	0.29777	2.59258	1
00000039_2.tif	control	15.682	1.773	9.64502	0.29777	2.872	1
00000039_2.tif	control	13.411	3.064	8.24275	0.29777	2.45444	1
00000039_2.tif	control	13.363	9.925	1.52556	0.29777	0.454266	1
00000039_2.tif	control	20.564	13.769	6.96176	0.29777	2.073	1
00000039_2.tif	control	20.724	13.7	7.08758	0.29777	2.11047	1
00000039_2.tif	control	21.252	13.47	7.51584	0.29777	2.23799	1
00000039_2.tif	control	22.536	13.019	8.65039	0.29777	2.57583	1
00000039_2.tif	control	22.62	12.991	8.72717	0.29777	2.59869	1
00000039_2.tif	control	19.655	9.95	5.74919	0.29777	1.71194	1
00000039_2.tif	control	19.717	9.866	5.82934	0.29777	1.7358	1
00000039_2.tif	control	20.057	7.418	7.13182	0.29777	2.12364	1
00000039_2.tif	control	18.634	5.019	7.75344	0.29777	2.30874	1
00000039_2.tif	control	18.606	4.852	7.87274	0.29777	2.34426	1
00000039_2.tif	control	20.146	7.354	7.2413	0.29777	2.15624	1
00000043_6.tif	control	15.875	8.458	3.09092	0.29777	0.920384	1
00000043_6.tif	control	17.016	8.568	3.23063	0.29777	0.961983	1
00000043_6.tif	control	17.276	15.734	4.45096	0.29777	1.32536	1
00000043_6.tif	control	16.682	14.328	2.92797	0.29777	0.871862	1
00000043_6.tif	control	19.005	19.651	8.72731	0.29777	2.59873	1
00000043_6.tif	control	18.224	13.755	3.30409	0.29777	0.98386	1
00000043_6.tif	control	18.484	12.953	3.06012	0.29777	0.911213	1
00000043_6.tif	control	18.568	12.943	3.1305	0.29777	0.932168	1
00000043_6.tif	control	19.88	9.922	4.4233	0.29777	1.31713	1
00000043_6.tif	control	19.786	9.755	4.40133	0.29777	1.31058	1
00000043_6.tif	control	25.363	10.873	9.62064	0.29777	2.86474	1
00000069_5.tif	predator	9.438	7.521	6.45291	0.29777	1.92148	1
00000069_5.tif	predator	10.28	9.72	4.67597	0.29777	1.39236	1
00000069_5.tif	predator	7.335	11.262	7.358	0.29777	2.19099	1
00000069_5.tif	predator	12.398	12.786	2.75271	0.29777	0.819675	1
00000069_5.tif	predator	12.439	13.023	2.8579	0.29777	0.850995	1
00000069_5.tif	predator	12.641	13.259	2.86055	0.29777	0.851786	1
00000069_5.tif	predator	19.63	19.672	9.74858	0.29777	2.90283	1
00000069_5.tif	predator	20.068	4.901	8.3309	0.29777	2.48069	1
00000069_5.tif	predator	13.714	1.363	9.95127	0.29777	2.96319	1
00000069_5.tif	predator	13.714	1.21	10.1035	0.29777	3.00853	1
00000091_6.tif	predator	11	1.656	10.1327	0.29777	3.01723	1
00000091_6.tif	predator	15.63	2.474	8.88229	0.29777	2.64488	1
00000091_6.tif	predator	12.307	21.359	10.2959	0.29777	3.06582	1
00000091_6.tif	predator	12.349	21.193	10.125	0.29777	3.01491	1
00000091_6.tif	predator	14.693	20.79	9.54982	0.29777	2.84365	1
00000091_6.tif	predator	16.891	20.509	9.62555	0.29777	2.8662	1
00000091_6.tif	predator	19.62	19.905	10.1803	0.29777	3.03139	1
00000091_6.tif	predator	15.043	18.391	7.1838	0.29777	2.13912	1
00000091_6.tif	predator	20.182	15.189	7.11237	0.29777	2.11785	1
00000091_6.tif	predator	21.606	14.599	8.07338	0.29777	2.40401	1
00000091_6.tif	predator	20.245	11.953	6.02615	0.29777	1.79441	1
00000091_6.tif	predator	15.016	12.193	1.20863	0.29777	0.359894	1
00000091_6.tif	predator	19.38	10.422	5.18652	0.29777	1.54439	1
00000091_6.tif	predator	18.314	4.797	7.62077	0.29777	2.26924	1
00000106_3.tif	control	12.99	15.521	4.69664	0.29777	1.39852	1
00000106_3.tif	control	18.498	18.887	8.67685	0.29777	2.58371	1
00000106_3.tif	control	20.37	10.172	5.81776	0.29777	1.73235	1
00000106_3.tif	control	24.266	10.172	9.68252	0.29777	2.88316	1
00000106_3.tif	control	17.401	3.901	7.73255	0.29777	2.30252	1
00000106_3.tif	control	25.092	12.113	10.509	0.29777	3.12927	1
0000011_20.tif	control	17.542	3.104	9.17267	0.29777	2.73134	2
0000011_20.tif	control	16.877	2.411	9.69136	0.29777	2.8858	2
0000011_20.tif	control	13.766	3.759	8.25815	0.29777	2.45903	2
0000011_20.tif	control	13.939	3.891	8.10289	0.29777	2.4128	2
0000011_20.tif	control	21.318	4.814	9.49941	0.29777	2.82864	2
0000011_20.tif	control	20.991	8.398	6.9368	0.29777	2.06557	2
0000011_20.tif	control	21.095	8.536	6.95839	0.29777	2.072	2
0000011_20.tif	control	21.304	13.887	6.58788	0.29777	1.96167	2
0000011_20.tif	control	21.693	15.2	7.43825	0.29777	2.21489	2
0000011_20.tif	control	21.957	15.464	7.79251	0.29777	2.32038	2
0000011_20.tif	control	20.741	16.575	7.3774	0.29777	2.19677	2
0000011_20.tif	control	21.964	18.835	9.80124	0.29777	2.91851	2
0000011_20.tif	control	22.054	18.773	9.8219	0.29777	2.92467	2
0000011_20.tif	control	20.568	17.592	7.93559	0.29777	2.36298	2
0000011_20.tif	control	20.401	17.474	7.73453	0.29777	2.30311	2
0000011_20.tif	control	20.352	17.335	7.60089	0.29777	2.26332	2
0000011_20.tif	control	20.269	17.161	7.41897	0.29777	2.20915	2
0000011_20.tif	control	20.276	17.55	7.70337	0.29777	2.29383	2
0000011_20.tif	control	20.116	17.516	7.56986	0.29777	2.25408	2
0000011_93.tif	control	12.562	18.167	5.99203	0.29777	1.78425	6
0000011_93.tif	control	13.45	16.911	4.67726	0.29777	1.39275	6
0000011_93.tif	control	9.679	18.064	6.9168	0.29777	2.05962	6
0000011_93.tif	control	9.616	18.092	6.97441	0.29777	2.07677	6
0000011_93.tif	control	9.644	19.939	8.57217	0.29777	2.55253	6
0000011_93.tif	control	9.512	19.8	8.50698	0.29777	2.53312	6
0000011_93.tif	control	8.102	17.252	7.29793	0.29777	2.1731	6
0000011_93.tif	control	10.026	16.891	5.75137	0.29777	1.71259	6
0000011_93.tif	control	10.276	16.863	5.58509	0.29777	1.66307	6
0000011_93.tif	control	10.2	16.502	5.335	0.29777	1.5886	6
0000011_93.tif	control	10.47	16.55	5.21715	0.29777	1.55351	6
0000011_93.tif	control	14.79	16.377	4.36964	0.29777	1.30115	6
0000011_93.tif	control	14.797	16.286	4.28573	0.29777	1.27616	6
0000011_93.tif	control	11.484	15.134	3.47633	0.29777	1.03515	6
0000011_93.tif	control	11.227	12.71	2.2255	0.29777	0.662687	6
0000011_93.tif	control	11.505	13.092	2.0811	0.29777	0.619689	6
0000011_93.tif	control	12.79	12.745	0.796519	0.29777	0.237179	6
0000011_93.tif	control	10.72	13.175	2.84135	0.29777	0.846067	6
0000011_93.tif	control	10.429	13.481	3.22301	0.29777	0.959716	6
0000011_93.tif	control	10.672	13.807	3.14988	0.29777	0.937941	6
0000011_93.tif	control	10.7	13.717	3.08135	0.29777	0.917532	6
0000011_93.tif	control	12.832	13.766	1.63425	0.29777	0.486632	6
0000011_93.tif	control	12.908	13.925	1.7614	0.29777	0.524492	6
0000011_93.tif	control	13.415	13.342	1.10809	0.29777	0.329955	6
0000011_93.tif	control	13.741	13.286	1.10558	0.29777	0.329208	6
0000011_93.tif	control	15.137	13.62	2.22142	0.29777	0.661471	6
0000011_93.tif	control	14.832	12.62	1.48215	0.29777	0.441339	6
0000011_93.tif	control	15.165	12.092	1.76971	0.29777	0.526965	6
0000011_93.tif	control	13.484	10.023	2.21256	0.29777	0.658833	6
0000011_93.tif	control	15.13	9.773	3.00765	0.29777	0.895588	6
0000011_93.tif	control	14.929	9.46	3.167	0.29777	0.943036	6
0000011_93.tif	control	10.776	11.342	2.77242	0.29777	0.825542	6
0000011_93.tif	control	10.686	11.238	2.89193	0.29777	0.861129	6
0000011_93.tif	control	10.693	10.009	3.50484	0.29777	1.04364	6
0000011_93.tif	control	11.457	9.675	3.21366	0.29777	0.956932	6
0000011_93.tif	control	12.089	9.311	3.20395	0.29777	0.954039	6
0000011_93.tif	control	11.04	9.398	3.69015	0.29777	1.09882	6
0000011_93.tif	control	8.325	8.425	6.3462	0.29777	1.88971	6
0000011_93.tif	control	11.116	9.064	3.9077	0.29777	1.1636	6
0000011_93.tif	control	11.332	8.703	4.09252	0.29777	1.21863	6
0000011_93.tif	control	11.498	8.474	4.21414	0.29777	1.25485	6
0000011_93.tif	control	13.991	8.842	3.44293	0.29777	1.0252	6
0000011_93.tif	control	14.186	8.814	3.50894	0.29777	1.04486	6
0000011_93.tif	control	13.887	7.106	5.15098	0.29777	1.53381	6
0000011_93.tif	control	15.158	7.134	5.39417	0.29777	1.60622	6
0000011_93.tif	control	15.165	7.064	5.46265	0.29777	1.62661	6
0000011_93.tif	control	15.165	6.939	5.5811	0.29777	1.66189	6
0000011_93.tif	control	12.512	6.627	5.67704	0.29777	1.69045	6
0000011_93.tif	control	12.352	6.849	5.48622	0.29777	1.63363	6
0000011_93.tif	control	13.755	4.578	7.66418	0.29777	2.28216	6
0000011_93.tif	control	12.957	5.585	6.66381	0.29777	1.98428	6
0000011_93.tif	control	9.915	6.161	7.00239	0.29777	2.0851	6
0000011_93.tif	control	9.839	6.036	7.14864	0.29777	2.12865	6
0000011_93.tif	control	19.158	3.905	10.125	0.29777	3.01492	6
0000011_93.tif	control	17.894	5.293	8.26828	0.29777	2.46205	6
0000011_93.tif	control	17.29	5.543	7.73911	0.29777	2.30447	6
0000011_93.tif	control	17.929	6.377	7.40319	0.29777	2.20445	6
0000011_93.tif	control	18.783	5.689	8.47366	0.29777	2.5232	6
0000011_93.tif	control	18.908	5.71	8.53754	0.29777	2.54222	6
0000011_93.tif	control	17.512	7.043	6.62169	0.29777	1.97174	6
0000011_93.tif	control	16.852	7.891	5.54717	0.29777	1.65178	6
0000011_93.tif	control	16.102	7.905	5.10251	0.29777	1.51938	6
0000011_93.tif	control	15.637	7.703	5.05269	0.29777	1.50454	6
0000011_93.tif	control	15.818	8.526	4.42619	0.29777	1.31799	6
0000011_93.tif	control	20.936	6.269	9.61028	0.29777	2.86165	6
0000011_93.tif	control	20.922	6.464	9.47936	0.29777	2.82267	6
0000011_93.tif	control	21.769	6.839	9.95638	0.29777	2.96471	6
0000011_93.tif	control	21.714	7.068	9.78742	0.29777	2.9144	6
0000011_93.tif	control	21.714	7.2	9.71839	0.29777	2.89385	6
0000011_93.tif	control	21.845	7.332	9.76375	0.29777	2.90735	6
0000011_93.tif	control	21.089	7.318	9.12537	0.29777	2.71726	6
0000011_93.tif	control	21.214	7.561	9.10384	0.29777	2.71085	6
0000011_93.tif	control	20.061	9.727	7.11622	0.29777	2.119	6
0000011_93.tif	control	20.505	9.644	7.56141	0.29777	2.25156	6
0000011_93.tif	control	18.727	9.429	6.01949	0.29777	1.79242	6
0000011_93.tif	control	16.262	9.811	3.74917	0.29777	1.11639	6
0000011_93.tif	control	16.102	10.158	3.40664	0.29777	1.01439	6
0000011_93.tif	control	16.109	10.345	3.30175	0.29777	0.983164	6
0000011_93.tif	control	18.957	11.401	5.6181	0.29777	1.6729	6
0000011_93.tif	control	19.047	11.207	5.73864	0.29777	1.7088	6
0000011_93.tif	control	19.352	11.29	6.02541	0.29777	1.79419	6
0000011_93.tif	control	15.318	11.769	1.97259	0.29777	0.587378	6
0000011_93.tif	control	15.339	12.734	2.00146	0.29777	0.595975	6
0000011_93.tif	control	15.359	14.019	2.64953	0.29777	0.788949	6
0000011_93.tif	control	15.519	14.151	2.85671	0.29777	0.850644	6
0000011_93.tif	control	15.922	14.22	3.2093	0.29777	0.955635	6
0000011_93.tif	control	15.943	14.394	3.33577	0.29777	0.993292	6
0000011_93.tif	control	19.63	15.543	7.05336	0.29777	2.10028	6
0000011_93.tif	control	18.568	15.196	5.95578	0.29777	1.77345	6
0000011_93.tif	control	18.429	15.002	5.73957	0.29777	1.70907	6
0000011_93.tif	control	15.887	16.745	5.15066	0.29777	1.53371	6
0000011_93.tif	control	16.457	16.571	5.30554	0.29777	1.57983	6
0000011_93.tif	control	16.734	16.71	5.58063	0.29777	1.66175	6
0000011_93.tif	control	16.901	16.759	5.72063	0.29777	1.70343	6
0000011_93.tif	control	17.109	16.877	5.94195	0.29777	1.76933	6
0000011_93.tif	control	17.714	17.71	6.97055	0.29777	2.07562	6
0000011_93.tif	control	17.845	17.655	7.00973	0.29777	2.08729	6
0000011_93.tif	control	18.019	17.8	7.23231	0.29777	2.15356	6
0000011_93.tif	control	17.679	17.155	6.52055	0.29777	1.94162	6
0000011_93.tif	control	17.741	17.03	6.46817	0.29777	1.92603	6
0000011_93.tif	control	19.512	18.398	8.67982	0.29777	2.58459	6
0000011_93.tif	control	15.887	17.856	6.14712	0.29777	1.83043	6
0000011_93.tif	control	16.484	18.203	6.71817	0.29777	2.00047	6
0000011_93.tif	control	15.714	18.87	7.02755	0.29777	2.09259	6
0000011_93.tif	control	22.113	8.269	9.57184	0.29777	2.85021	6
0000013_19.tif	control	8.583	2.328	9.93936	0.29777	2.95964	2
0000013_19.tif	control	7.927	2.474	10.1509	0.29777	3.02262	2
0000013_19.tif	control	8.344	3.526	9.04293	0.29777	2.69271	2
0000013_19.tif	control	8.208	3.708	8.97096	0.29777	2.67128	2
0000013_19.tif	control	8.286	3.828	8.82797	0.29777	2.6287	2
0000013_19.tif	control	7.932	4.422	8.57323	0.29777	2.55285	2
0000013_19.tif	control	6.047	6.266	8.76305	0.29777	2.60937	2
0000013_19.tif	control	7.146	10.432	6.29216	0.29777	1.87362	2
0000013_19.tif	control	3.896	13.651	9.87312	0.29777	2.93992	2
0000013_19.tif	control	4.099	13.536	9.64696	0.29777	2.87257	2
0000013_19.tif	control	7.135	14.615	7.23471	0.29777	2.15428	2
0000013_19.tif	control	7.958	14.281	6.35574	0.29777	1.89255	2
0000013_19.tif	control	8.057	14.224	6.24152	0.29777	1.85854	2
0000013_19.tif	control	8.505	14.036	5.76101	0.29777	1.71546	2
0000013_19.tif	control	8.458	13.984	5.77419	0.29777	1.71938	2
0000013_19.tif	control	8.505	13.672	5.57881	0.29777	1.6612	2
0000013_19.tif	control	9.859	15.894	6.0342	0.29777	1.7968	2
0000013_19.tif	control	14.37	15.616	4.6989	0.29777	1.39919	2
0000013_19.tif	control	14.273	15.526	4.59164	0.29777	1.36725	2
0000013_19.tif	control	15.189	13.269	2.87007	0.29777	0.85462	2
0000013_19.tif	control	15.293	13.345	2.99436	0.29777	0.891629	2
0000013_19.tif	control	15.363	13.165	2.90319	0.29777	0.864483	2
0000013_19.tif	control	14.648	13.116	2.43725	0.29777	0.725739	2
0000013_19.tif	control	11.359	10.943	2.0533	0.29777	0.611411	2
0000013_19.tif	control	11.533	10.839	1.88632	0.29777	0.56169	2
0000013_19.tif	control	15.734	10.498	2.38005	0.29777	0.708708	2
0000013_19.tif	control	12.04	7.061	4.18589	0.29777	1.24643	2
0000013_19.tif	control	12.13	6.984	4.2306	0.29777	1.25975	2
0000013_19.tif	control	14.172	6.269	4.80761	0.29777	1.43156	2
0000013_19.tif	control	15.519	6.825	4.69128	0.29777	1.39692	2
0000013_19.tif	control	15.672	7.2	4.43554	0.29777	1.32077	2
0000013_19.tif	control	10.158	1.05	10.4835	0.29777	3.12166	2
0000013_19.tif	control	16.873	4.411	7.45731	0.29777	2.22056	2
0000013_19.tif	control	19.644	11.97	6.30559	0.29777	1.87761	2
0000013_19.tif	control	17.651	13.887	5.12057	0.29777	1.52475	2
0000013_19.tif	control	17.589	15.818	6.36513	0.29777	1.89534	2
0000013_19.tif	control	18.804	15.568	7.05728	0.29777	2.10145	2
0000013_19.tif	control	19.714	14.943	7.42625	0.29777	2.21131	2
0000013_76.tif	predator	6.24	7.083	8.92847	0.29777	2.65863	5
0000013_76.tif	predator	5.634	8.307	9.01599	0.29777	2.68469	5
0000013_76.tif	predator	6.161	9.627	8.17345	0.29777	2.43381	5
0000013_76.tif	predator	6.276	15.609	9.09076	0.29777	2.70696	5
0000013_76.tif	predator	5.373	14.165	9.324	0.29777	2.77641	5
0000013_76.tif	predator	5.2	14.109	9.47011	0.29777	2.81992	5
0000013_76.tif	predator	4.873	12.672	9.44491	0.29777	2.81241	5
0000013_76.tif	predator	5.533	11.7	8.67802	0.29777	2.58405	5
0000013_76.tif	predator	5.672	11.415	8.5254	0.29777	2.53861	5
0000013_76.tif	predator	7.609	11.714	6.60889	0.29777	1.96793	5
0000013_76.tif	predator	7.616	11.609	6.59363	0.29777	1.96339	5
0000013_76.tif	predator	9.755	11.568	4.45849	0.29777	1.32761	5
0000013_76.tif	predator	11.151	12.894	3.51095	0.29777	1.04546	5
0000013_76.tif	predator	11.082	12.727	3.49195	0.29777	1.0398	5
0000013_76.tif	predator	11.269	10.991	2.92784	0.29777	0.871824	5
0000013_76.tif	predator	11.401	10.901	2.8023	0.29777	0.83444	5
0000013_76.tif	predator	8.172	17.703	8.90574	0.29777	2.65186	5
0000013_76.tif	predator	15.22	15.3	4.28392	0.29777	1.27562	5
0000013_76.tif	predator	14.519	13.995	2.87256	0.29777	0.855362	5
0000013_76.tif	predator	15.248	12.37	1.61971	0.29777	0.482302	5
0000013_76.tif	predator	15.339	12.259	1.60101	0.29777	0.476733	5
0000013_76.tif	predator	11.922	12.321	2.55927	0.29777	0.762073	5
0000013_76.tif	predator	15.582	9.925	1.84607	0.29777	0.549704	5
0000013_76.tif	predator	15.505	9.793	1.88108	0.29777	0.560128	5
0000013_76.tif	predator	11.38	8.887	3.60465	0.29777	1.07336	5
0000013_76.tif	predator	11.464	8.825	3.57929	0.29777	1.0658	5
0000013_76.tif	predator	13.693	9.019	2.18011	0.29777	0.649172	5
0000013_76.tif	predator	15.7	9.207	2.45182	0.29777	0.730077	5
0000013_76.tif	predator	15.554	8.116	3.31707	0.29777	0.987724	5
0000013_76.tif	predator	15.658	8.026	3.4423	0.29777	1.02501	5
0000013_76.tif	predator	15.151	8.033	3.2523	0.29777	0.968436	5
0000013_76.tif	predator	14.964	7.95	3.28282	0.29777	0.977526	5
0000013_76.tif	predator	14.811	7.457	3.73548	0.29777	1.11231	5
0000013_76.tif	predator	15.276	7.339	3.95324	0.29777	1.17716	5
0000013_76.tif	predator	15.554	6.741	4.60568	0.29777	1.37143	5
0000013_76.tif	predator	12.929	6.214	5.08655	0.29777	1.51462	5
0000013_76.tif	predator	13.29	5.887	5.33103	0.29777	1.58742	5
0000013_76.tif	predator	11.491	4.28	7.37388	0.29777	2.19572	5
0000013_76.tif	predator	12.012	4.585	6.90926	0.29777	2.05737	5
0000013_76.tif	predator	12.13	4.578	6.8796	0.29777	2.04854	5
0000013_76.tif	predator	12.873	5.196	6.08978	0.29777	1.81335	5
0000013_76.tif	predator	12.936	5.37	5.90631	0.29777	1.75872	5
0000013_76.tif	predator	11.561	3.891	7.71297	0.29777	2.29669	5
0000013_76.tif	predator	11.568	3.786	7.80939	0.29777	2.3254	5
0000013_76.tif	predator	12.783	3.148	8.11641	0.29777	2.41682	5
0000013_76.tif	predator	13.415	1.252	9.91956	0.29777	2.95375	5
0000013_76.tif	predator	12.276	1.099	10.2233	0.29777	3.0442	5
0000013_76.tif	predator	16.911	11.658	2.76673	0.29777	0.82385	5
0000013_76.tif	predator	16.807	8.526	3.69746	0.29777	1.10099	5
0000013_76.tif	predator	16.786	8.373	3.79282	0.29777	1.12939	5
0000013_76.tif	predator	21.981	10.262	7.83745	0.29777	2.33376	5
0000013_76.tif	predator	22.085	10.332	7.93336	0.29777	2.36232	5
0000013_76.tif	predator	17.144	18.036	7.49996	0.29777	2.23326	5
0000013_76.tif	predator	18.04	16.988	6.99906	0.29777	2.08411	5
0000013_76.tif	predator	17.901	16.411	6.44377	0.29777	1.91876	5
0000013_76.tif	predator	16.158	14.599	3.97731	0.29777	1.18432	5
0000013_76.tif	predator	17.241	13.564	3.89374	0.29777	1.15944	5
0000013_76.tif	predator	18.075	13.46	4.52191	0.29777	1.34649	5
0000013_76.tif	predator	17.186	12.922	3.48282	0.29777	1.03708	5
00000171_2.tif	control	5.188	11.417	10.2986	0.29777	3.06661	1
00000171_2.tif	control	16.693	21.422	9.68638	0.29777	2.88431	1
00000171_2.tif	control	19.38	21.682	10.6129	0.29777	3.16022	1
00000171_2.tif	control	19.411	21.62	10.5668	0.29777	3.14648	1
00000171_2.tif	control	19.016	17.526	6.72013	0.29777	2.00105	1
00000171_2.tif	control	18.922	17.536	6.6797	0.29777	1.98902	1
00000171_2.tif	control	18.036	17.37	6.11797	0.29777	1.82175	1
00000171_2.tif	control	18.203	15.182	4.33325	0.29777	1.29031	1
00000171_2.tif	control	18.932	13.328	3.77114	0.29777	1.12293	1
00000171_2.tif	control	18.984	13.193	3.76725	0.29777	1.12177	1
00000189_8.tif	predator	11.552	17.406	6.94651	0.29777	2.06846	1
00000189_8.tif	predator	12.734	17.255	6.22952	0.29777	1.85496	1
00000189_8.tif	predator	13.109	16.203	5.11972	0.29777	1.5245	1
00000189_8.tif	predator	11.318	15.786	5.83309	0.29777	1.73692	1
00000189_8.tif	predator	16.214	9.964	1.84942	0.29777	0.550703	1
00000189_8.tif	predator	13.891	5.151	6.65491	0.29777	1.98163	1
00000189_8.tif	predator	16.63	6.786	4.99503	0.29777	1.48737	1
00000189_8.tif	predator	17.818	14.786	3.96913	0.29777	1.18189	1
00000189_8.tif	predator	22.505	16.151	8.41215	0.29777	2.50489	1
00000189_8.tif	predator	22.547	14.672	7.75734	0.29777	2.3099	1
00000189_8.tif	predator	23.401	14.234	8.40363	0.29777	2.50235	1
00000189_8.tif	predator	23.193	13.286	7.95625	0.29777	2.36913	1
0000020_10.tif	predator	10.047	17.863	6.65369	0.29777	1.98127	1
0000020_10.tif	predator	14.762	16.585	5.21912	0.29777	1.5541	1
0000020_10.tif	predator	14.7	16.481	5.09923	0.29777	1.5184	1
0000020_10.tif	predator	13.547	12.033	0.852654	0.29777	0.253895	1
0000020_10.tif	predator	11.908	8.175	3.69452	0.29777	1.10012	1
0000020_10.tif	predator	11.547	7.217	4.71099	0.29777	1.40279	1
0000020_10.tif	predator	19.123	11.648	6.39028	0.29777	1.90283	1
0000020_10.tif	predator	16.693	11.898	3.96088	0.29777	1.17943	1
0000020_10.tif	predator	22.286	11.12	9.5745	0.29777	2.851	1
0000020_42.tif	control	10.625	3.917	8.66402	0.29777	2.57988	2
0000020_42.tif	control	8.651	6.797	7.8514	0.29777	2.33791	2
0000020_42.tif	control	7.068	7.693	8.77062	0.29777	2.61163	2
0000020_42.tif	control	7.158	7.859	8.61991	0.29777	2.56675	2
0000020_42.tif	control	5.443	11.505	9.58382	0.29777	2.85377	2
0000020_42.tif	control	10.97	12.88	4.32448	0.29777	1.2877	2
0000020_42.tif	control	11.047	12.97	4.28492	0.29777	1.27592	2
0000020_42.tif	control	13.366	14.168	3.24477	0.29777	0.966196	2
0000020_42.tif	control	13.63	14.252	3.19331	0.29777	0.950871	2
0000020_42.tif	control	13.38	13.405	2.60959	0.29777	0.777057	2
0000020_42.tif	control	13.484	13.62	2.71944	0.29777	0.809768	2
0000020_42.tif	control	13.54	13.53	2.61356	0.29777	0.77824	2
0000020_42.tif	control	14.72	13.571	2.21227	0.29777	0.658746	2
0000020_42.tif	control	14.79	14.523	3.15185	0.29777	0.938526	2
0000020_42.tif	control	12.401	9.807	3.06022	0.29777	0.911242	2
0000020_42.tif	control	12.54	9.863	2.9123	0.29777	0.867195	2
0000020_42.tif	control	12.686	8.967	3.36127	0.29777	1.00089	2
0000020_42.tif	control	14.332	8.585	2.87987	0.29777	0.857539	2
0000020_42.tif	control	13.797	7.078	4.47411	0.29777	1.33226	2
0000020_42.tif	control	13.964	6.155	5.33184	0.29777	1.58766	2
0000020_42.tif	control	11.908	3.12	8.8289	0.29777	2.62898	2
0000020_42.tif	control	12.005	3.099	8.81484	0.29777	2.62479	2
0000020_42.tif	control	12.283	3.099	8.72347	0.29777	2.59759	2
0000020_42.tif	control	11.443	3.238	8.89551	0.29777	2.64882	2
0000021_74.tif	control	8.688	18.365	8.06482	0.29777	2.40146	5
0000021_74.tif	control	8.7	18.22	7.93761	0.29777	2.36358	5
0000021_74.tif	control	10.408	16.373	5.46453	0.29777	1.62717	5
0000021_74.tif	control	10.269	16.172	5.36455	0.29777	1.5974	5
0000021_74.tif	control	10.186	16.172	5.40943	0.29777	1.61077	5
0000021_74.tif	control	7.845	13.151	5.50706	0.29777	1.63984	5
0000021_74.tif	control	7.852	13.054	5.47449	0.29777	1.63014	5
0000021_74.tif	control	8.172	13.45	5.28805	0.29777	1.57462	5
0000021_74.tif	control	11.234	14.484	3.42335	0.29777	1.01937	5
0000021_74.tif	control	10.283	12.498	2.98372	0.29777	0.888464	5
0000021_74.tif	control	10.109	12.436	3.13449	0.29777	0.933358	5
0000021_74.tif	control	10.248	11.38	2.90475	0.29777	0.864947	5
0000021_74.tif	control	10.255	11.13	2.93089	0.29777	0.872731	5
0000021_74.tif	control	5.776	7.87	8.27428	0.29777	2.46383	5
0000021_74.tif	control	5.908	7.842	8.16999	0.29777	2.43278	5
0000021_74.tif	control	8.748	9.828	4.75241	0.29777	1.41513	5
0000021_74.tif	control	8.852	9.807	4.66466	0.29777	1.389	5
0000021_74.tif	control	9.554	10.286	3.8344	0.29777	1.14177	5
0000021_74.tif	control	9.568	10.127	3.88053	0.29777	1.15551	5
0000021_74.tif	control	10.602	8.745	3.85141	0.29777	1.14683	5
0000021_74.tif	control	10.762	8.689	3.7913	0.29777	1.12893	5
0000021_74.tif	control	12.005	8.807	3.0532	0.29777	0.909152	5
0000021_74.tif	control	11.977	8.71	3.15367	0.29777	0.939069	5
0000021_74.tif	control	10.658	7.967	4.43436	0.29777	1.32042	5
0000021_74.tif	control	10.839	7.898	4.39423	0.29777	1.30847	5
0000021_74.tif	control	6.477	4.46	9.79672	0.29777	2.91717	5
0000021_74.tif	control	7.762	4.231	9.15651	0.29777	2.72654	5
0000021_74.tif	control	11.637	5.425	6.39536	0.29777	1.90435	5
0000021_74.tif	control	11.602	5.495	6.33576	0.29777	1.8866	5
0000021_74.tif	control	10.964	2.609	9.29066	0.29777	2.76648	5
0000021_74.tif	control	4.193	10.536	9.01597	0.29777	2.68469	5
0000021_74.tif	control	14.464	17.127	5.64327	0.29777	1.6804	5
0000021_74.tif	control	12.082	15.884	4.37316	0.29777	1.3022	5
0000021_74.tif	control	12.193	16.002	4.46285	0.29777	1.3289	5
0000021_74.tif	control	12.373	14.898	3.34632	0.29777	0.996434	5
0000021_74.tif	control	11.741	14.613	3.28524	0.29777	0.978245	5
0000021_74.tif	control	12.172	14.543	3.0595	0.29777	0.911029	5
0000021_74.tif	control	12.234	14.405	2.90901	0.29777	0.866216	5
0000021_74.tif	control	13.915	15.384	3.82219	0.29777	1.13813	5
0000021_74.tif	control	14.297	15.293	3.83059	0.29777	1.14064	5
0000021_74.tif	control	14.075	13.752	2.30839	0.29777	0.68737	5
0000021_74.tif	control	15.804	13.349	3.16367	0.29777	0.942047	5
0000021_74.tif	control	15.97	13.002	3.13936	0.29777	0.934806	5
0000021_74.tif	control	12.061	12.224	1.22731	0.29777	0.365456	5
0000021_74.tif	control	12.63	9.47	2.23033	0.29777	0.664125	5
0000021_74.tif	control	13.04	9.637	2.00654	0.29777	0.597488	5
0000021_74.tif	control	13.991	11.13	0.991777	0.29777	0.295321	5
0000021_74.tif	control	14.109	11.179	1.0726	0.29777	0.319388	5
0000021_74.tif	control	14.193	10.887	1.2943	0.29777	0.385405	5
0000021_74.tif	control	12.845	6.62	5.02972	0.29777	1.4977	5
0000021_74.tif	control	13.144	6.488	5.153	0.29777	1.53441	5
0000021_74.tif	control	13.45	6.703	4.94766	0.29777	1.47326	5
0000021_74.tif	control	13.79	6.425	5.25622	0.29777	1.56514	5
0000021_74.tif	control	13.484	4.786	6.86358	0.29777	2.04377	5
0000021_74.tif	control	13.248	4.384	7.25779	0.29777	2.16115	5
0000021_74.tif	control	13.359	4.307	7.33724	0.29777	2.18481	5
0000021_74.tif	control	13.644	4.148	7.50986	0.29777	2.23621	5
0000021_74.tif	control	13.998	4.37	7.32133	0.29777	2.18007	5
0000021_74.tif	control	14.026	4.536	7.15991	0.29777	2.13201	5
0000021_74.tif	control	13.991	4.675	7.01767	0.29777	2.08965	5
0000021_74.tif	control	14.075	4.675	7.02834	0.29777	2.09283	5
0000021_74.tif	control	13.797	3.516	8.15144	0.29777	2.42725	5
0000021_74.tif	control	14.825	3.328	8.48185	0.29777	2.52564	5
0000021_74.tif	control	15.589	3.592	8.41303	0.29777	2.50515	5
0000021_74.tif	control	18.464	6.064	7.70956	0.29777	2.29567	5
0000021_74.tif	control	20.019	6.717	8.45888	0.29777	2.5188	5
0000021_74.tif	control	18.422	7.793	6.53422	0.29777	1.9457	5
0000021_74.tif	control	19.623	8.12	7.37657	0.29777	2.19652	5
0000021_74.tif	control	20.04	8.141	7.73603	0.29777	2.30356	5
0000021_74.tif	control	19.04	5.863	8.25733	0.29777	2.45878	5
0000021_74.tif	control	19.297	10.245	6.3123	0.29777	1.87961	5
0000021_74.tif	control	19.408	10.092	6.45559	0.29777	1.92228	5
0000021_74.tif	control	20.345	9.8	7.43552	0.29777	2.21407	5
0000021_74.tif	control	20.936	9.766	8.01733	0.29777	2.38732	5
0000021_74.tif	control	21.79	9.78	8.84695	0.29777	2.63436	5
0000021_74.tif	control	22.894	9.981	9.89326	0.29777	2.94592	5
0000021_74.tif	control	21.408	10.439	8.35393	0.29777	2.48755	5
0000021_74.tif	control	21.04	10.37	8.0006	0.29777	2.38234	5
0000021_74.tif	control	20.741	10.21	7.73355	0.29777	2.30282	5
0000021_74.tif	control	20.477	10.467	7.42935	0.29777	2.21224	5
0000021_74.tif	control	20.644	10.53	7.58481	0.29777	2.25853	5
0000021_74.tif	control	20.776	10.523	7.71642	0.29777	2.29772	5
0000021_74.tif	control	20.797	10.634	7.72194	0.29777	2.29936	5
0000021_74.tif	control	20.72	10.717	7.63512	0.29777	2.27351	5
0000021_74.tif	control	18.297	13.512	5.48498	0.29777	1.63326	5
0000021_74.tif	control	18.741	13.45	5.88494	0.29777	1.75236	5
0000021_74.tif	control	17.408	16.568	6.51787	0.29777	1.94083	5
0000023_42.tif	control	8.094	7.141	8.82995	0.29777	2.62929	2
0000023_42.tif	control	8.047	7.24	8.82165	0.29777	2.62682	2
0000023_42.tif	control	8.061	11.436	7.67414	0.29777	2.28513	2
0000023_42.tif	control	8.2	13.165	7.7014	0.29777	2.29325	2
0000023_42.tif	control	8.943	13.582	7.08335	0.29777	2.10921	2
0000023_42.tif	control	14.37	19.068	7.62302	0.29777	2.26991	2
0000023_42.tif	control	14.356	18.894	7.45447	0.29777	2.21972	2
0000023_42.tif	control	13.009	10.13	3.08115	0.29777	0.917473	2
0000023_42.tif	control	12.821	10.123	3.25171	0.29777	0.968261	2
0000023_42.tif	control	16.03	16.415	4.85603	0.29777	1.44598	2
0000023_42.tif	control	18.28	19.547	8.37535	0.29777	2.49393	2
0000023_42.tif	control	18.266	19.408	8.23873	0.29777	2.45325	2
0000023_42.tif	control	18.064	17.071	5.97594	0.29777	1.77946	2
0000023_42.tif	control	20.502	17.036	7.25485	0.29777	2.16028	2
0000023_42.tif	control	20.342	16.981	7.10874	0.29777	2.11677	2
0000023_42.tif	control	19.203	16.293	5.86171	0.29777	1.74544	2
0000023_42.tif	control	19.245	16.175	5.79237	0.29777	1.72479	2
0000023_42.tif	control	17.724	15.356	4.27891	0.29777	1.27413	2
0000023_42.tif	control	17.724	15.203	4.14407	0.29777	1.23398	2
0000023_42.tif	control	18.911	12.981	3.47705	0.29777	1.03536	2
0000023_42.tif	control	17.863	11.825	2.14446	0.29777	0.638555	2
0000023_42.tif	control	20.745	11.248	5.02121	0.29777	1.49516	2
0000023_42.tif	control	23.109	6.776	8.79511	0.29777	2.61892	2
0000023_42.tif	control	22.936	6.828	8.62186	0.29777	2.56733	2
0000023_42.tif	control	22.873	9.818	7.35036	0.29777	2.18872	2
0000023_42.tif	control	23.241	11.082	7.52272	0.29777	2.24004	2
0000023_42.tif	control	22.498	13.606	7.06436	0.29777	2.10355	2
0000023_42.tif	control	22.248	13.731	6.86373	0.29777	2.04381	2
0000023_42.tif	control	22.13	13.78	6.7677	0.29777	2.01522	2
0000023_42.tif	control	23.123	14.776	8.05535	0.29777	2.39864	2
0000023_42.tif	control	23.2	14.748	8.11502	0.29777	2.41641	2
0000023_42.tif	control	23.151	14.894	8.1286	0.29777	2.42045	2
0000023_42.tif	control	23.54	15.137	8.5832	0.29777	2.55582	2
0000023_42.tif	control	23.505	15.262	8.60431	0.29777	2.5621	2
0000023_42.tif	control	23.79	15.533	8.97888	0.29777	2.67364	2
0000023_42.tif	control	23.644	15.908	9.0224	0.29777	2.6866	2
0000023_42.tif	control	23.227	16.29	8.85677	0.29777	2.63728	2
0000024_23.tif	predator	7.635	16.698	10.2316	0.29777	3.04667	2
0000024_23.tif	predator	8.554	17.255	9.78672	0.29777	2.91419	2
0000024_23.tif	predator	9.47	16.179	8.41229	0.29777	2.50493	2
0000024_23.tif	predator	13.519	13.148	3.3603	0.29777	1.0006	2
0000024_23.tif	predator	13.63	11.641	2.74014	0.29777	0.815932	2
0000024_23.tif	predator	12.714	10.259	3.79827	0.29777	1.13101	2
0000024_23.tif	predator	12.686	10.113	3.86905	0.29777	1.15209	2
0000024_23.tif	predator	18.842	9.984	2.83544	0.29777	0.84431	2
0000024_23.tif	predator	13.54	1.849	9.90321	0.29777	2.94888	2
0000024_23.tif	predator	18.432	11.262	2.07962	0.29777	0.619248	2
0000024_23.tif	predator	18.974	12.38	2.81739	0.29777	0.838935	2
0000024_23.tif	predator	18.877	10.408	2.69103	0.29777	0.801307	2
0000024_23.tif	predator	18.856	10.276	2.72041	0.29777	0.810056	2
0000024_23.tif	predator	19.189	13.672	3.66835	0.29777	1.09233	2
0000024_23.tif	predator	19.238	13.561	3.63766	0.29777	1.08318	2
0000024_23.tif	predator	20.224	13.894	4.63459	0.29777	1.38004	2
0000024_23.tif	predator	20.502	16.332	6.48738	0.29777	1.93175	2
0000024_23.tif	predator	23.495	13.04	7.33964	0.29777	2.18552	2
0000024_23.tif	predator	22.446	6.474	7.79932	0.29777	2.3224	2
0000024_23.tif	predator	22.391	6.356	7.83106	0.29777	2.33185	2
0000024_23.tif	predator	14.79	21.304	10.082	0.29777	3.00213	2
0000024_23.tif	predator	14.797	21.227	10.0049	0.29777	2.97916	2
0000027_91.tif	control	5.948	14.219	9.93912	0.29777	2.95957	6
0000027_91.tif	control	6.137	14.068	9.71982	0.29777	2.89427	6
0000027_91.tif	control	6.839	13.075	8.84407	0.29777	2.6335	6
0000027_91.tif	control	6.436	12.012	9.15995	0.29777	2.72756	6
0000027_91.tif	control	6.547	11.88	9.04718	0.29777	2.69398	6
0000027_91.tif	control	6.547	11.727	9.04751	0.29777	2.69408	6
0000027_91.tif	control	6.54	11.359	9.06588	0.29777	2.69955	6
0000027_91.tif	control	6.665	11.457	8.9365	0.29777	2.66102	6
0000027_91.tif	control	8.602	12.227	7.00366	0.29777	2.08548	6
0000027_91.tif	control	9.408	11.075	6.23106	0.29777	1.85542	6
0000027_91.tif	control	11.901	11.797	3.69309	0.29777	1.09969	6
0000027_91.tif	control	11.95	11.88	3.64445	0.29777	1.08521	6
0000027_91.tif	control	11.575	12.262	4.04291	0.29777	1.20386	6
0000027_91.tif	control	11.45	12.658	4.22729	0.29777	1.25876	6
0000027_91.tif	control	11.45	13.88	4.62644	0.29777	1.37762	6
0000027_91.tif	control	10.616	14.269	5.54648	0.29777	1.65157	6
0000027_91.tif	control	10.63	14.693	5.73395	0.29777	1.7074	6
0000027_91.tif	control	10.227	14.859	6.1662	0.29777	1.83611	6
0000027_91.tif	control	10.04	14.936	6.36692	0.29777	1.89588	6
0000027_91.tif	control	8.575	15.714	8.02535	0.29777	2.38971	6
0000027_91.tif	control	8.498	15.88	8.17389	0.29777	2.43394	6
0000027_91.tif	control	7.38	16.019	9.22368	0.29777	2.74653	6
0000027_91.tif	control	7.22	16.172	9.43598	0.29777	2.80975	6
0000027_91.tif	control	10.575	14.575	5.72397	0.29777	1.70443	6
0000027_91.tif	control	8.339	6.852	8.79465	0.29777	2.61878	6
0000027_91.tif	control	11.033	10.068	4.887	0.29777	1.4552	6
0000027_91.tif	control	11.491	10.068	4.46258	0.29777	1.32882	6
0000027_91.tif	control	11.616	10.137	4.32054	0.29777	1.28653	6
0000027_91.tif	control	11.422	8.241	5.49876	0.29777	1.63736	6
0000027_91.tif	control	11.957	8.352	5.02749	0.29777	1.49703	6
0000027_91.tif	control	11.873	7.998	5.33633	0.29777	1.589	6
0000027_91.tif	control	11.825	7.818	5.49958	0.29777	1.63761	6
0000027_91.tif	control	10.214	3.172	10.1875	0.29777	3.03352	6
0000027_91.tif	control	10.873	2.894	10.1002	0.29777	3.00755	6
0000027_91.tif	control	10.547	3.977	9.32909	0.29777	2.77792	6
0000027_91.tif	control	10.616	4.366	8.9659	0.29777	2.66978	6
0000027_91.tif	control	10.672	4.491	8.83087	0.29777	2.62957	6
0000027_91.tif	control	10.227	5.089	8.61112	0.29777	2.56413	6
0000027_91.tif	control	9.141	15.318	7.33868	0.29777	2.18524	6
0000027_91.tif	control	8.943	16.648	8.21684	0.29777	2.44673	6
0000027_91.tif	control	8.797	16.672	8.34937	0.29777	2.48619	6
0000027_91.tif	control	10.082	18.189	8.42069	0.29777	2.50743	6
0000027_91.tif	control	10.186	18.293	8.43252	0.29777	2.51095	6
0000027_91.tif	control	10.269	17.842	8.03642	0.29777	2.393	6
0000027_91.tif	control	11.984	16.835	6.17675	0.29777	1.83925	6
0000027_91.tif	control	13.568	16.62	5.20729	0.29777	1.55058	6
0000027_91.tif	control	14.089	16.946	5.33949	0.29777	1.58994	6
0000027_91.tif	control	16.339	16.377	4.61454	0.29777	1.37407	6
0000027_91.tif	control	16.484	16.418	4.6804	0.29777	1.39368	6
0000027_91.tif	control	12.568	13.898	3.6691	0.29777	1.09255	6
0000027_91.tif	control	12.714	13.849	3.52123	0.29777	1.04852	6
0000027_91.tif	control	13.38	13.12	2.56593	0.29777	0.764057	6
0000027_91.tif	control	16.387	12.891	1.33022	0.29777	0.396098	6
0000027_91.tif	control	16.345	13.141	1.51695	0.29777	0.451701	6
0000027_91.tif	control	17.089	13.155	2.00231	0.29777	0.596228	6
0000027_91.tif	control	16.929	13.495	2.13958	0.29777	0.637103	6
0000027_91.tif	control	16.762	13.939	2.41696	0.29777	0.719697	6
0000027_91.tif	control	17.061	13.953	2.58631	0.29777	0.770125	6
0000027_91.tif	control	17.144	13.849	2.55092	0.29777	0.759586	6
0000027_91.tif	control	17.012	13.773	2.41106	0.29777	0.717942	6
0000027_91.tif	control	17.387	14.161	2.94637	0.29777	0.87734	6
0000027_91.tif	control	17.484	14.099	2.95842	0.29777	0.88093	6
0000027_91.tif	control	17.366	14.009	2.814	0.29777	0.837924	6
0000027_91.tif	control	12.325	11.682	3.27204	0.29777	0.974315	6
0000027_91.tif	control	13.234	11.738	2.36153	0.29777	0.703193	6
0000027_91.tif	control	13.672	11.411	1.96566	0.29777	0.585315	6
0000027_91.tif	control	16.512	11.335	1.03965	0.29777	0.309576	6
0000027_91.tif	control	16.651	11.37	1.14998	0.29777	0.34243	6
0000027_91.tif	control	17.707	11.349	2.16551	0.29777	0.644825	6
0000027_91.tif	control	16.852	9.418	2.71415	0.29777	0.808191	6
0000027_91.tif	control	12.22	7.418	5.54868	0.29777	1.65223	6
0000027_91.tif	control	12.714	7.03	5.59171	0.29777	1.66504	6
0000027_91.tif	control	12.88	7.682	4.95113	0.29777	1.4743	6
0000027_91.tif	control	12.964	7.745	4.85252	0.29777	1.44494	6
0000027_91.tif	control	14.373	7.821	4.18412	0.29777	1.2459	6
0000027_91.tif	control	14.457	7.773	4.20657	0.29777	1.25259	6
0000027_91.tif	control	16.526	7.189	4.72679	0.29777	1.4075	6
0000027_91.tif	control	16.797	6.724	5.23899	0.29777	1.56001	6
0000027_91.tif	control	16.741	6.648	5.30059	0.29777	1.57836	6
0000027_91.tif	control	18.012	7.648	4.82466	0.29777	1.43664	6
0000027_91.tif	control	18.089	7.856	4.68638	0.29777	1.39546	6
0000027_91.tif	control	14.047	5.373	6.63293	0.29777	1.97509	6
0000027_91.tif	control	14.332	5.151	6.7903	0.29777	2.02195	6
0000027_91.tif	control	14.526	5.29	6.61972	0.29777	1.97115	6
0000027_91.tif	control	14.47	5.464	6.45757	0.29777	1.92287	6
0000027_91.tif	control	15.63	5.526	6.2971	0.29777	1.87509	6
0000027_91.tif	control	16.269	4.679	7.17582	0.29777	2.13674	6
0000027_91.tif	control	19.266	5.321	7.46723	0.29777	2.22352	6
0000027_91.tif	control	18.613	6.641	5.99729	0.29777	1.78581	6
0000027_91.tif	control	18.502	6.71	5.88211	0.29777	1.75152	6
0000027_91.tif	control	22.106	9.155	7.03736	0.29777	2.09551	6
0000027_91.tif	control	19.113	11.179	3.57744	0.29777	1.06526	6
0000027_91.tif	control	19.085	11.019	3.58239	0.29777	1.06673	6
0000027_91.tif	control	19.099	10.845	3.63889	0.29777	1.08355	6
0000027_91.tif	control	18.96	11.345	3.39977	0.29777	1.01235	6
0000027_91.tif	control	19.509	10.845	4.03531	0.29777	1.20159	6
0000027_91.tif	control	19.835	11.464	4.25617	0.29777	1.26736	6
0000027_91.tif	control	19.939	11.512	4.35612	0.29777	1.29712	6
0000027_91.tif	control	20.238	11.477	4.65687	0.29777	1.38668	6
0000027_91.tif	control	20.092	10.082	4.82318	0.29777	1.4362	6
0000027_91.tif	control	20.814	10.366	5.41952	0.29777	1.61377	6
0000027_91.tif	control	20.946	10.873	5.43566	0.29777	1.61858	6
0000027_91.tif	control	20.856	11.033	5.32097	0.29777	1.58443	6
0000027_91.tif	control	21.016	11.158	5.46263	0.29777	1.62661	6
0000027_91.tif	control	21.321	11.665	5.72918	0.29777	1.70598	6
0000027_91.tif	control	18.967	12.79	3.50888	0.29777	1.04484	6
0000027_91.tif	control	19.155	12.901	3.72059	0.29777	1.10788	6
0000027_91.tif	control	20.53	13.915	5.36102	0.29777	1.59635	6
0000027_91.tif	control	20.731	13.839	5.51843	0.29777	1.64322	6
0000027_91.tif	control	21.835	12.991	6.34935	0.29777	1.89065	6
0000027_91.tif	control	19.78	14.793	5.13259	0.29777	1.52833	6
0000027_91.tif	control	19.717	16.752	6.42605	0.29777	1.91349	6
0000027_91.tif	control	20.905	16.599	7.14261	0.29777	2.12686	6
0000027_91.tif	control	21.87	15.953	7.51299	0.29777	2.23714	6
0000027_91.tif	control	24.425	10.533	8.92472	0.29777	2.65751	6
0000027_91.tif	control	24.439	10.464	8.94879	0.29777	2.66468	6
0000033_77.tif	predator	4.125	9.948	9.95506	0.29777	2.96432	5
0000033_77.tif	predator	4.238	8.78	10.0594	0.29777	2.99539	5
0000033_77.tif	predator	5.689	10.016	8.39605	0.29777	2.50009	5
0000033_77.tif	predator	6.939	8.8	7.46031	0.29777	2.22146	5
0000033_77.tif	predator	7.474	7.835	7.34614	0.29777	2.18746	5
0000033_77.tif	predator	8.842	6.602	6.91522	0.29777	2.05914	5
0000033_77.tif	predator	10.224	6.592	5.96369	0.29777	1.77581	5
0000033_77.tif	predator	10.307	8.266	4.72161	0.29777	1.40595	5
0000033_77.tif	predator	8.78	10.446	5.27532	0.29777	1.57083	5
0000033_77.tif	predator	6.391	11.863	7.63714	0.29777	2.27411	5
0000033_77.tif	predator	6.384	12.099	7.66794	0.29777	2.28328	5
0000033_77.tif	predator	9.203	12.175	4.8935	0.29777	1.45714	5
0000033_77.tif	predator	10.564	9.405	3.88032	0.29777	1.15544	5
0000033_77.tif	predator	10.606	5.259	6.84908	0.29777	2.03945	5
0000033_77.tif	predator	9.099	14.359	5.82654	0.29777	1.73497	5
0000033_77.tif	predator	9.161	14.498	5.8515	0.29777	1.7424	5
0000033_77.tif	predator	10.335	16.54	6.47012	0.29777	1.92661	5
0000033_77.tif	predator	5.96	17.318	10.0982	0.29777	3.00694	5
0000033_77.tif	predator	5.988	17.234	10.0252	0.29777	2.98521	5
0000033_77.tif	predator	12.766	20.318	9.1932	0.29777	2.73746	5
0000033_77.tif	predator	13.967	19.005	7.79707	0.29777	2.32173	5
0000033_77.tif	predator	13.488	17.679	6.49122	0.29777	1.93289	5
0000033_77.tif	predator	14.439	14.87	3.68822	0.29777	1.09824	5
0000033_77.tif	predator	14.53	14.856	3.6863	0.29777	1.09767	5
0000033_77.tif	predator	14.536	11.759	0.768698	0.29777	0.228895	5
0000033_77.tif	predator	10.807	10.606	3.24925	0.29777	0.96753	5
0000033_77.tif	predator	11.585	12.155	2.59404	0.29777	0.772427	5
0000033_77.tif	predator	10.724	9.526	3.68257	0.29777	1.09656	5
0000033_77.tif	predator	10.946	9.345	3.57739	0.29777	1.06524	5
0000033_77.tif	predator	10.918	9.7	3.43115	0.29777	1.02169	5
0000033_77.tif	predator	11.911	9.505	2.69521	0.29777	0.802551	5
0000033_77.tif	predator	12.203	7.908	3.75755	0.29777	1.11889	5
0000033_77.tif	predator	12.286	7.769	3.84246	0.29777	1.14417	5
0000033_77.tif	predator	11.043	7.422	4.80392	0.29777	1.43046	5
0000033_77.tif	predator	16.335	6.418	5.32882	0.29777	1.58676	5
0000033_77.tif	predator	16.238	6.606	5.11733	0.29777	1.52379	5
0000033_77.tif	predator	15.773	10.807	1.81778	0.29777	0.541281	5
0000033_77.tif	predator	15.113	14.009	3.01403	0.29777	0.897487	5
0000033_77.tif	predator	15.641	12.648	2.18323	0.29777	0.6501	5
0000033_77.tif	predator	16.523	12.3	2.74918	0.29777	0.818623	5
0000033_77.tif	predator	16.592	12.231	2.78657	0.29777	0.829758	5
0000033_77.tif	predator	16.807	11.995	2.91524	0.29777	0.868071	5
0000033_77.tif	predator	18.057	11.62	4.07787	0.29777	1.21427	5
0000033_77.tif	predator	18.675	13.773	5.33243	0.29777	1.58784	5
0000033_77.tif	predator	17.043	14.439	4.43838	0.29777	1.32162	5
0000033_77.tif	predator	17.106	14.55	4.56248	0.29777	1.35857	5
0000033_77.tif	predator	17.217	14.314	4.47173	0.29777	1.33155	5
0000033_77.tif	predator	17.252	14.446	4.58913	0.29777	1.36651	5
0000033_77.tif	predator	17.349	14.3	4.5581	0.29777	1.35727	5
0000033_77.tif	predator	15.085	15.807	4.72525	0.29777	1.40704	5
0000033_77.tif	predator	17.37	19.45	8.90435	0.29777	2.65145	5
0000033_77.tif	predator	18.273	18.922	8.81841	0.29777	2.62586	5
0000033_77.tif	predator	18.016	17.443	7.41643	0.29777	2.20839	5
0000033_77.tif	predator	19.96	17.818	8.90021	0.29777	2.65021	5
0000033_77.tif	predator	20.759	13.536	7.14868	0.29777	2.12866	5
0000033_77.tif	predator	21.856	11.939	7.88994	0.29777	2.34939	5
0000033_77.tif	predator	21.884	11.828	7.90834	0.29777	2.35487	5
0000033_78.tif	predator	8.229	20.094	10.264	0.29777	3.05632	5
0000033_78.tif	predator	8.286	19.964	10.1231	0.29777	3.01435	5
0000033_78.tif	predator	10.724	20.345	9.4913	0.29777	2.82623	5
0000033_78.tif	predator	9.3	18.311	8.18418	0.29777	2.437	5
0000033_78.tif	predator	10.092	17.255	6.87428	0.29777	2.04695	5
0000033_78.tif	predator	11.203	16.63	5.82577	0.29777	1.73474	5
0000033_78.tif	predator	8.009	16.026	7.23078	0.29777	2.15311	5
0000033_78.tif	predator	6.571	14.148	7.45346	0.29777	2.21942	5
0000033_78.tif	predator	8.509	14.502	5.90513	0.29777	1.75837	5
0000033_78.tif	predator	10.155	14.064	4.32397	0.29777	1.28755	5
0000033_78.tif	predator	9.8	11.238	3.63802	0.29777	1.08329	5
0000033_78.tif	predator	11.071	7.363	4.55098	0.29777	1.35515	5
0000033_78.tif	predator	11.21	7.356	4.48634	0.29777	1.3359	5
0000033_78.tif	predator	11.286	6.863	4.8864	0.29777	1.45502	5
0000033_78.tif	predator	10.481	1.693	10.004	0.29777	2.97889	5
0000033_78.tif	predator	10.634	1.609	10.0405	0.29777	2.98975	5
0000033_78.tif	predator	13.898	1.689	9.57206	0.29777	2.85027	5
0000033_78.tif	predator	17.759	3.425	8.93877	0.29777	2.6617	5
0000033_78.tif	predator	15.738	5.217	6.45655	0.29777	1.92257	5
0000033_78.tif	predator	14.939	5.467	5.97462	0.29777	1.77906	5
0000033_78.tif	predator	13.231	5.488	5.76572	0.29777	1.71686	5
0000033_78.tif	predator	18.377	7.398	6.26352	0.29777	1.86509	5
0000033_78.tif	predator	13.252	8.398	2.85806	0.29777	0.851044	5
0000033_78.tif	predator	13.002	12.686	1.50073	0.29777	0.446873	5
0000033_78.tif	predator	13.675	12.616	1.38641	0.29777	0.41283	5
0000033_78.tif	predator	13.877	12.547	1.36928	0.29777	0.407731	5
0000033_78.tif	predator	13.981	12.422	1.29168	0.29777	0.384623	5
0000033_78.tif	predator	15.342	12.2	2.12784	0.29777	0.633608	5
0000033_78.tif	predator	13.405	13.464	2.21425	0.29777	0.659336	5
0000033_78.tif	predator	13.28	15.234	3.98713	0.29777	1.18725	5
0000033_78.tif	predator	12.689	16.089	4.89662	0.29777	1.45807	5
0000033_78.tif	predator	14.78	15.311	4.27699	0.29777	1.27356	5
0000033_78.tif	predator	11.634	18.335	7.31106	0.29777	2.17702	5
0000033_78.tif	predator	11.877	16.648	5.61917	0.29777	1.67322	5
0000033_78.tif	predator	14.231	16.981	5.7856	0.29777	1.72278	5
0000033_78.tif	predator	15.085	16.648	5.64367	0.29777	1.68052	5
0000033_78.tif	predator	17.786	17.03	7.23281	0.29777	2.15371	5
0000033_78.tif	predator	13.314	19.863	8.61389	0.29777	2.56496	5
0000033_78.tif	predator	12.925	21.335	10.098	0.29777	3.00689	5
0000033_78.tif	predator	14.481	20.474	9.28278	0.29777	2.76413	5
0000033_78.tif	predator	16.238	20.717	9.87239	0.29777	2.9397	5
0000033_78.tif	predator	15.703	21.286	10.2884	0.29777	3.06358	5
0000033_78.tif	predator	15.613	21.384	10.3648	0.29777	3.08632	5
0000033_78.tif	predator	19.113	16.79	7.93078	0.29777	2.36155	5
0000033_78.tif	predator	20.099	17.345	9.02873	0.29777	2.68848	5
0000033_78.tif	predator	20.217	17.325	9.10277	0.29777	2.71053	5
0000033_78.tif	predator	22.036	14.589	9.22359	0.29777	2.74651	5
0000033_78.tif	predator	21.12	14.373	8.29254	0.29777	2.46927	5
0000033_78.tif	predator	18.46	14.262	5.85599	0.29777	1.74374	5
0000033_78.tif	predator	19.03	14.373	6.40497	0.29777	1.90721	5
0000033_78.tif	predator	19.141	14.436	6.5326	0.29777	1.94521	5
0000033_78.tif	predator	19.127	13.852	6.25581	0.29777	1.86279	5
0000033_78.tif	predator	20.342	13.38	7.2251	0.29777	2.15142	5
0000033_78.tif	predator	20.321	13.255	7.16908	0.29777	2.13474	5
0000033_78.tif	predator	20.821	13.595	7.74646	0.29777	2.30666	5
0000033_78.tif	predator	18.786	12.075	5.41126	0.29777	1.61131	5
0000033_78.tif	predator	21.168	11.415	7.73176	0.29777	2.30229	5
0000033_78.tif	predator	21.724	9.637	8.44154	0.29777	2.51364	5
0000033_78.tif	predator	19.141	7.616	6.76241	0.29777	2.01364	5
0000033_78.tif	predator	18.87	7.304	6.71398	0.29777	1.99922	5
0000033_78.tif	predator	18.884	6.144	7.46526	0.29777	2.22293	5
0000033_78.tif	predator	18.877	5.526	7.89601	0.29777	2.35119	5
0000033_78.tif	predator	19.571	6.582	7.70739	0.29777	2.29503	5
0000033_78.tif	predator	19.96	6.234	8.2278	0.29777	2.44999	5
0000033_78.tif	predator	20.918	6.998	8.60406	0.29777	2.56203	5
0000033_78.tif	predator	20.925	6.859	8.67963	0.29777	2.58453	5
0000033_78.tif	predator	21.807	6.991	9.39038	0.29777	2.79617	5
0000036_58.tif	predator	6.667	16.938	9.15063	0.29777	2.72478	4
0000036_58.tif	predator	5.599	15.62	9.32474	0.29777	2.77663	4
0000036_58.tif	predator	5.439	15.516	9.41892	0.29777	2.80467	4
0000036_58.tif	predator	4.87	14.189	9.4367	0.29777	2.80997	4
0000036_58.tif	predator	5.96	11.085	7.88083	0.29777	2.34668	4
0000036_58.tif	predator	5.356	12.925	8.64582	0.29777	2.57447	4
0000036_58.tif	predator	5.418	13.106	8.62203	0.29777	2.56738	4
0000036_58.tif	predator	7.398	12.849	6.63531	0.29777	1.9758	4
0000036_58.tif	predator	7.411	12.731	6.59528	0.29777	1.96388	4
0000036_58.tif	predator	4.974	9.72	8.99691	0.29777	2.67901	4
0000036_58.tif	predator	5.349	8.477	8.93294	0.29777	2.65996	4
0000036_58.tif	predator	5.009	7.332	9.66224	0.29777	2.87712	4
0000036_58.tif	predator	5.863	6.47	9.30123	0.29777	2.76963	4
0000036_58.tif	predator	11.498	1.595	9.93961	0.29777	2.95972	4
0000036_58.tif	predator	11.158	3.609	8.10241	0.29777	2.41266	4
0000036_58.tif	predator	10.026	4.533	7.72815	0.29777	2.30121	4
0000036_58.tif	predator	10.068	4.429	7.79838	0.29777	2.32212	4
0000036_58.tif	predator	10.089	4.936	7.34794	0.29777	2.188	4
0000036_58.tif	predator	10.845	5.116	6.83018	0.29777	2.03382	4
0000036_58.tif	predator	10.707	5.137	6.87309	0.29777	2.0466	4
0000036_58.tif	predator	11.915	6.568	5.06653	0.29777	1.50866	4
0000036_58.tif	predator	12.075	6.498	5.07353	0.29777	1.51075	4
0000036_58.tif	predator	10.901	9.144	3.61776	0.29777	1.07726	4
0000036_58.tif	predator	10.776	9.359	3.60233	0.29777	1.07267	4
0000036_58.tif	predator	12.991	9.193	2.22956	0.29777	0.663897	4
0000036_58.tif	predator	10.984	11.443	2.86118	0.29777	0.851975	4
0000036_58.tif	predator	10.908	11.575	2.94842	0.29777	0.87795	4
0000036_58.tif	predator	11.776	12.776	2.56309	0.29777	0.76321	4
0000036_58.tif	predator	9.575	12.415	4.41897	0.29777	1.31584	4
0000036_58.tif	predator	10.984	13.307	3.51593	0.29777	1.04694	4
0000036_58.tif	predator	11.095	13.432	3.50269	0.29777	1.043	4
0000036_58.tif	predator	8.443	18.707	9.2005	0.29777	2.73963	4
0000036_58.tif	predator	14.644	13.981	2.84238	0.29777	0.846374	4
0000036_58.tif	predator	15.068	12.286	1.60418	0.29777	0.477677	4
0000036_58.tif	predator	15.144	12.141	1.57735	0.29777	0.469686	4
0000036_58.tif	predator	16.547	11.377	2.71075	0.29777	0.807179	4
0000036_58.tif	predator	16.755	12.668	3.24031	0.29777	0.964868	4
0000036_58.tif	predator	17.366	12.967	3.92054	0.29777	1.16742	4
0000036_58.tif	predator	18.095	12.946	4.57963	0.29777	1.36368	4
0000036_58.tif	predator	13.825	7.45	3.80503	0.29777	1.13302	4
0000036_58.tif	predator	14.276	7.234	4.04468	0.29777	1.20438	4
0000036_58.tif	predator	14.151	7.915	3.35454	0.29777	0.998882	4
0000036_58.tif	predator	14.297	7.922	3.36432	0.29777	1.00179	4
0000036_58.tif	predator	14.7	7.984	3.38242	0.29777	1.00718	4
0000036_58.tif	predator	14.79	7.908	3.47948	0.29777	1.03609	4
0000036_58.tif	predator	14.998	9.151	2.4021	0.29777	0.715274	4
0000036_58.tif	predator	14.887	9.762	1.8241	0.29777	0.543163	4
0000036_58.tif	predator	15.012	9.783	1.88221	0.29777	0.560466	4
0000036_58.tif	predator	15.977	8.276	3.66681	0.29777	1.09187	4
0000036_58.tif	predator	15.922	8.137	3.74978	0.29777	1.11657	4
0000036_58.tif	predator	21.411	9.161	7.85621	0.29777	2.33934	4
0000036_58.tif	predator	21.464	9.203	7.89629	0.29777	2.35128	4
0000038_57.tif	control	6.521	6.167	8.7326	0.29777	2.60031	4
0000038_57.tif	control	8.203	6.661	7.07149	0.29777	2.10568	4
0000038_57.tif	control	8.526	6.505	6.91566	0.29777	2.05927	4
0000038_57.tif	control	8.714	6.964	6.48156	0.29777	1.93001	4
0000038_57.tif	control	8.589	7.286	6.39186	0.29777	1.9033	4
0000038_57.tif	control	7.141	8.943	6.98708	0.29777	2.08054	4
0000038_57.tif	control	8.214	9.172	5.89391	0.29777	1.75503	4
0000038_57.tif	control	8.318	9.276	5.76401	0.29777	1.71635	4
0000038_57.tif	control	10.005	7.057	5.45116	0.29777	1.62319	4
0000038_57.tif	control	9.578	5.755	6.70503	0.29777	1.99656	4
0000038_57.tif	control	10.328	5.922	6.11778	0.29777	1.82169	4
0000038_57.tif	control	10.13	4.911	7.07171	0.29777	2.10574	4
0000038_57.tif	control	11.401	7.318	4.35945	0.29777	1.29811	4
0000038_57.tif	control	11.505	7.255	4.35521	0.29777	1.29685	4
0000038_57.tif	control	12.995	6.307	4.70138	0.29777	1.39993	4
0000038_57.tif	control	13.349	4.828	6.12364	0.29777	1.82344	4
0000038_57.tif	control	8.297	13.109	5.95425	0.29777	1.773	4
0000038_57.tif	control	8.578	13.109	5.69363	0.29777	1.69539	4
0000038_57.tif	control	8.505	12.953	5.70403	0.29777	1.69849	4
0000038_57.tif	control	6.193	16.651	9.54821	0.29777	2.84317	4
0000038_57.tif	control	6.672	17.526	9.73893	0.29777	2.89996	4
0000038_57.tif	control	6.797	17.589	9.69048	0.29777	2.88553	4
0000038_57.tif	control	6.797	17.672	9.74769	0.29777	2.90257	4
0000038_57.tif	control	6.859	17.984	9.92225	0.29777	2.95455	4
0000038_57.tif	control	7.891	18.318	9.48323	0.29777	2.82382	4
0000038_57.tif	control	7.839	18.255	9.46712	0.29777	2.81902	4
0000038_57.tif	control	7.453	17.37	9.06801	0.29777	2.70018	4
0000038_57.tif	control	7.172	17.255	9.18854	0.29777	2.73607	4
0000038_57.tif	control	9.328	14.734	5.89952	0.29777	1.7567	4
0000038_57.tif	control	10.745	17.578	7.3309	0.29777	2.18292	4
0000038_57.tif	control	10.995	16.839	6.55599	0.29777	1.95218	4
0000038_57.tif	control	11.995	15.703	5.11496	0.29777	1.52308	4
0000038_57.tif	control	12.286	15.026	4.37866	0.29777	1.30383	4
0000038_57.tif	control	11.547	13.964	3.80083	0.29777	1.13177	4
0000038_57.tif	control	11.682	13.505	3.35753	0.29777	0.99977	4
0000038_57.tif	control	11.62	13.307	3.25032	0.29777	0.967848	4
0000038_57.tif	control	12.734	13.693	2.97391	0.29777	0.885541	4
0000038_57.tif	control	12.87	13.88	3.10317	0.29777	0.924031	4
0000038_57.tif	control	13.891	14.37	3.43839	0.29777	1.02385	4
0000038_57.tif	control	13.953	14.339	3.40891	0.29777	1.01507	4
0000038_57.tif	control	7.63	14.911	7.37456	0.29777	2.19592	4
0000038_57.tif	control	10.141	20.255	10.0296	0.29777	2.98652	4
0000038_57.tif	control	15.161	18.432	7.61562	0.29777	2.2677	4
0000038_57.tif	control	15.714	17.234	6.57502	0.29777	1.95784	4
0000038_57.tif	control	14.307	16.151	5.23994	0.29777	1.5603	4
0000038_57.tif	control	16.005	16.193	5.68944	0.29777	1.69414	4
0000038_57.tif	control	15.911	16.016	5.49001	0.29777	1.63476	4
0000038_57.tif	control	18.693	16.12	7.10469	0.29777	2.11556	4
0000038_57.tif	control	18.609	16.078	7.01671	0.29777	2.08937	4
0000038_57.tif	control	14.193	12.859	1.95925	0.29777	0.583405	4
0000038_57.tif	control	19.661	13.464	6.34876	0.29777	1.89047	4
0000038_57.tif	control	14.339	10.276	0.824825	0.29777	0.245608	4
0000038_57.tif	control	15.13	9.349	2.04269	0.29777	0.608251	4
0000038_57.tif	control	15.109	7.547	3.6154	0.29777	1.07656	4
0000038_57.tif	control	15.786	6.151	5.16224	0.29777	1.53716	4
0000038_57.tif	control	15.995	6.016	5.368	0.29777	1.59843	4
0000038_57.tif	control	15.984	5.661	5.69074	0.29777	1.69453	4
0000038_57.tif	control	16.089	5.641	5.74954	0.29777	1.71204	4
0000038_57.tif	control	16.234	4.547	6.8194	0.29777	2.03061	4
0000038_57.tif	control	16.255	4.443	6.92417	0.29777	2.06181	4
0000038_57.tif	control	17.807	4.839	7.27115	0.29777	2.16513	4
0000039_24.tif	predator	5.469	11.615	9.21085	0.29777	2.74272	2
0000039_24.tif	predator	6.37	11.714	8.3195	0.29777	2.4773	2
0000039_24.tif	predator	6.88	12.234	7.87421	0.29777	2.3447	2
0000039_24.tif	predator	9.526	12.432	5.32401	0.29777	1.58533	2
0000039_24.tif	predator	8.568	11.13	6.09389	0.29777	1.81458	2
0000039_24.tif	predator	5.964	8.599	9.02929	0.29777	2.68865	2
0000039_24.tif	predator	5.911	8.474	9.11456	0.29777	2.71404	2
0000039_24.tif	predator	6.943	8.568	8.09996	0.29777	2.41192	2
0000039_24.tif	predator	8.141	7.849	7.25284	0.29777	2.15968	2
0000039_24.tif	predator	13.714	10.193	1.26123	0.29777	0.375556	2
0000039_24.tif	predator	14.484	9.599	1.43794	0.29777	0.428174	2
0000039_24.tif	predator	8.464	3.078	10.0784	0.29777	3.00104	2
0000039_24.tif	predator	10.724	1.922	9.91881	0.29777	2.95352	2
0000039_24.tif	predator	13.005	1.693	9.47878	0.29777	2.8225	2
0000039_24.tif	predator	15.464	1.016	10.0422	0.29777	2.99025	2
0000039_24.tif	predator	15.422	0.776	10.2782	0.29777	3.06054	2
0000039_24.tif	predator	12.891	4.057	7.19026	0.29777	2.14104	2
0000039_24.tif	predator	14.214	20.005	8.99012	0.29777	2.67699	2
0000039_24.tif	predator	12.443	18.745	8.03134	0.29777	2.39149	2
0000039_24.tif	predator	11.047	18.516	8.31632	0.29777	2.47635	2
0000039_24.tif	predator	11.172	17.911	7.71857	0.29777	2.29836	2
0000039_24.tif	predator	11.339	17.224	7.03213	0.29777	2.09396	2
0000039_24.tif	predator	11.151	16.807	6.76314	0.29777	2.01386	2
0000039_24.tif	predator	18.276	19.828	9.51543	0.29777	2.83341	2
0000042_38.tif	control	5.335	6.484	9.72308	0.29777	2.89524	3
0000042_38.tif	control	6.571	7.943	7.92503	0.29777	2.35984	3
0000042_38.tif	control	6.877	7.332	7.96632	0.29777	2.37213	3
0000042_38.tif	control	7.002	8.262	7.39575	0.29777	2.20223	3
0000042_38.tif	control	7.967	8.658	6.35665	0.29777	1.89282	3
0000042_38.tif	control	8.127	8.644	6.22213	0.29777	1.85276	3
0000042_38.tif	control	7.398	7.672	7.34423	0.29777	2.18689	3
0000042_38.tif	control	7.286	7.547	7.50596	0.29777	2.23505	3
0000042_38.tif	control	7.21	7.373	7.66486	0.29777	2.28236	3
0000042_38.tif	control	7.363	7.311	7.57296	0.29777	2.255	3
0000042_38.tif	control	6.182	9.72	7.65041	0.29777	2.27806	3
0000042_38.tif	control	6.599	9.859	7.21204	0.29777	2.14753	3
0000042_38.tif	control	7.099	11.137	6.51257	0.29777	1.93925	3
0000042_38.tif	control	9.356	19.859	9.26953	0.29777	2.76019	3
0000042_38.tif	control	10.766	17.304	6.35313	0.29777	1.89177	3
0000042_38.tif	control	10.884	17.234	6.23837	0.29777	1.8576	3
0000042_38.tif	control	10.55	15.526	4.95599	0.29777	1.47575	3
0000042_38.tif	control	10.3	15.457	5.06077	0.29777	1.50695	3
0000042_38.tif	control	10.155	15.332	5.06387	0.29777	1.50787	3
0000042_38.tif	control	9.766	15.102	5.1781	0.29777	1.54188	3
0000042_38.tif	control	8.911	16.609	6.84621	0.29777	2.03859	3
0000042_38.tif	control	8.446	16.352	6.99579	0.29777	2.08314	3
0000042_38.tif	control	8.571	16.311	6.87626	0.29777	2.04754	3
0000042_38.tif	control	8.613	16.352	6.87383	0.29777	2.04682	3
0000042_38.tif	control	8.3	16.575	7.25452	0.29777	2.16018	3
0000042_38.tif	control	8.3	16.72	7.35442	0.29777	2.18992	3
0000042_38.tif	control	7.856	17.304	8.08018	0.29777	2.40604	3
0000042_38.tif	control	6.78	16.686	8.49386	0.29777	2.52922	3
0000042_38.tif	control	6.564	16.082	8.32916	0.29777	2.48018	3
0000042_38.tif	control	13.245	20.731	9.12268	0.29777	2.71646	3
0000042_38.tif	control	14.009	21.259	9.65292	0.29777	2.87435	3
0000042_38.tif	control	16.564	19.186	8.13271	0.29777	2.42168	3
0000042_38.tif	control	16.731	19.297	8.29782	0.29777	2.47084	3
0000042_38.tif	control	19.655	18.311	9.03173	0.29777	2.68938	3
0000042_38.tif	control	15.613	15.741	4.5935	0.29777	1.36781	3
0000042_38.tif	control	15.627	15.623	4.49412	0.29777	1.33822	3
0000042_38.tif	control	16.995	10.731	3.51401	0.29777	1.04637	3
0000042_38.tif	control	16.766	10.377	3.40503	0.29777	1.01392	3
0000042_38.tif	control	14.516	9.571	2.24232	0.29777	0.667697	3
0000042_38.tif	control	21.391	9.62	8.04818	0.29777	2.39651	3
0000042_38.tif	control	21.422	9.484	8.11288	0.29777	2.41577	3
0000042_38.tif	control	12.432	8.724	3.11579	0.29777	0.927788	3
0000042_38.tif	control	12.859	8.516	3.18497	0.29777	0.948388	3
0000042_38.tif	control	11.016	6.839	5.42736	0.29777	1.61611	3
0000042_38.tif	control	10.641	6.547	5.86556	0.29777	1.74659	3
0000044_39.tif	control	7.646	13.073	6.92171	0.29777	2.06108	3
0000044_39.tif	control	7.665	12.977	6.87558	0.29777	2.04734	3
0000044_39.tif	control	8.734	12.533	5.72562	0.29777	1.70492	3
0000044_39.tif	control	8.672	12.443	5.76248	0.29777	1.71589	3
0000044_39.tif	control	9.033	12.373	5.39544	0.29777	1.6066	3
0000044_39.tif	control	9.241	12.415	5.20552	0.29777	1.55005	3
0000044_39.tif	control	10.727	12.068	3.68151	0.29777	1.09624	3
0000044_39.tif	control	7.019	11.547	7.25546	0.29777	2.16046	3
0000044_39.tif	control	6.297	14.582	8.72044	0.29777	2.59669	3
0000044_39.tif	control	6.332	14.394	8.61306	0.29777	2.56471	3
0000044_39.tif	control	11.793	17.53	6.96374	0.29777	2.07359	3
0000044_39.tif	control	12.661	17.55	6.72562	0.29777	2.00269	3
0000044_39.tif	control	12.411	16.877	6.14424	0.29777	1.82957	3
0000044_39.tif	control	11.03	14.439	4.70293	0.29777	1.40039	3
0000044_39.tif	control	12.168	10.953	2.08795	0.29777	0.621729	3
0000044_39.tif	control	12.686	4.898	6.31599	0.29777	1.88071	3
0000044_39.tif	control	15.363	3.932	7.17013	0.29777	2.13505	3
0000044_39.tif	control	15.328	4.057	7.04124	0.29777	2.09667	3
0000044_39.tif	control	17.002	6.071	5.65677	0.29777	1.68442	3
0000044_39.tif	control	16.988	6.21	5.52874	0.29777	1.64629	3
0000044_39.tif	control	18.03	5.599	6.60261	0.29777	1.96606	3
0000044_39.tif	control	19.307	5.314	7.6181	0.29777	2.26844	3
0000044_39.tif	control	18.064	7.405	5.2486	0.29777	1.56288	3
0000044_39.tif	control	16.759	8.856	3.3069	0.29777	0.984697	3
0000044_39.tif	control	16.939	8.877	3.43208	0.29777	1.02197	3
0000044_39.tif	control	13.359	10.953	0.898212	0.29777	0.267461	3
0000044_39.tif	control	15.526	9.453	2.01455	0.29777	0.599872	3
0000044_39.tif	control	17.036	10.099	2.92828	0.29777	0.871955	3
0000044_39.tif	control	17.089	9.849	3.06487	0.29777	0.912627	3
0000044_39.tif	control	17.484	11.297	3.2412	0.29777	0.965133	3
0000044_39.tif	control	17.526	11.13	3.27299	0.29777	0.974597	3
0000044_39.tif	control	18.026	10.911	3.77246	0.29777	1.12333	3
0000044_39.tif	control	20.016	12.255	5.89273	0.29777	1.75468	3
0000044_39.tif	control	16.286	16.536	5.88178	0.29777	1.75142	3
0000044_39.tif	control	16.266	16.37	5.71922	0.29777	1.70301	3
0000044_39.tif	control	13.776	17.63	6.63132	0.29777	1.97461	3
0000044_39.tif	control	14.516	17.391	6.38034	0.29777	1.89987	3
0000044_39.tif	control	13.474	16.411	5.45124	0.29777	1.62321	3
0000044_39.tif	control	14.891	19.661	8.66836	0.29777	2.58118	3
0000044_39.tif	control	23.411	13.536	9.49646	0.29777	2.82776	3
0000044_39.tif	control	23.901	12.547	9.76674	0.29777	2.90824	3
0000044_39.tif	control	23.901	12.547	9.76674	0.29777	2.90824	3
0000044_39.tif	control	24.036	12.516	9.89535	0.29777	2.94654	3
0000044_39.tif	control	23.901	12.141	9.71138	0.29777	2.89176	3
0000044_39.tif	control	23.297	12.307	9.1337	0.29777	2.71974	3
0000044_39.tif	control	23.172	12.068	8.97884	0.29777	2.67363	3
0000044_39.tif	control	23.307	11.172	9.05334	0.29777	2.69581	3
0000044_39.tif	control	23.411	11.099	9.15638	0.29777	2.72649	3
0000045_21.tif	control	11.286	4.87	7.29999	0.29777	2.17372	2
0000045_21.tif	control	6.766	15.193	8.70278	0.29777	2.59143	2
0000045_21.tif	control	7.849	12.391	6.8154	0.29777	2.02942	2
0000045_21.tif	control	10.089	9.693	4.80583	0.29777	1.43103	2
0000045_21.tif	control	14.182	10.568	0.908291	0.29777	0.270462	2
0000045_21.tif	control	8.318	5.38	8.67902	0.29777	2.58435	2
0000045_21.tif	control	8.391	5.38	8.62642	0.29777	2.56869	2
0000045_21.tif	control	15.443	17.172	5.85462	0.29777	1.74333	2
0000045_21.tif	control	17.516	13.068	3.37886	0.29777	1.00612	2
0000045_21.tif	control	17.547	12.943	3.34555	0.29777	0.996206	2
0000045_21.tif	control	19.255	13.464	5.11025	0.29777	1.52168	2
0000045_21.tif	control	20.953	12.849	6.53134	0.29777	1.94484	2
0000045_21.tif	control	21.641	13.922	7.49616	0.29777	2.23213	2
0000045_21.tif	control	15.495	20.87	9.53315	0.29777	2.83869	2
0000045_21.tif	control	16.474	20.828	9.63421	0.29777	2.86878	2
0000045_21.tif	control	16.839	20.953	9.83386	0.29777	2.92823	2
0000045_21.tif	control	16.724	20.984	9.83845	0.29777	2.92959	2
0000045_21.tif	control	17.099	20.714	9.66559	0.29777	2.87812	2
0000045_21.tif	control	16.661	20.297	9.15457	0.29777	2.72596	2
0000045_21.tif	control	16.776	20.141	9.02984	0.29777	2.68882	2
0000056_38.tif	control	6.854	15.125	7.89474	0.29777	2.35082	2
0000056_38.tif	control	6.887	16.099	8.36104	0.29777	2.48967	2
0000056_38.tif	control	6.936	14.96	7.74664	0.29777	2.30672	2
0000056_38.tif	control	8.554	18.158	8.52557	0.29777	2.53866	2
0000056_38.tif	control	8.505	17.95	8.39491	0.29777	2.49975	2
0000056_38.tif	control	11.714	12.769	2.50045	0.29777	0.744559	2
0000056_38.tif	control	11.79	12.679	2.38931	0.29777	0.711464	2
0000056_38.tif	control	12.797	10.394	1.52182	0.29777	0.453153	2
0000056_38.tif	control	11.339	7.582	4.645	0.29777	1.38314	2
0000056_38.tif	control	11.297	7.429	4.79655	0.29777	1.42827	2
0000056_38.tif	control	9.339	4.516	8.30563	0.29777	2.47317	2
0000056_38.tif	control	10.707	3.894	8.21847	0.29777	2.44721	2
0000056_38.tif	control	10.72	3.422	8.65154	0.29777	2.57617	2
0000056_38.tif	control	12.484	1.946	9.6366	0.29777	2.86949	2
0000056_38.tif	control	16.144	3.918	7.90352	0.29777	2.35343	2
0000056_38.tif	control	16.255	4.064	7.79726	0.29777	2.32179	2
0000056_38.tif	control	18.422	4.252	8.55119	0.29777	2.54629	2
0000056_38.tif	control	18.54	4.335	8.54517	0.29777	2.5445	2
0000056_38.tif	control	17.797	5.307	7.32552	0.29777	2.18132	2
0000056_38.tif	control	17.672	5.273	7.28804	0.29777	2.17016	2
0000056_38.tif	control	18.484	5.925	7.2314	0.29777	2.15329	2
0000056_38.tif	control	18.408	5.981	7.13978	0.29777	2.12601	2
0000056_38.tif	control	16.137	6.259	5.69999	0.29777	1.69729	2
0000056_38.tif	control	15.88	6.411	5.46075	0.29777	1.62605	2
0000056_38.tif	control	18.804	8.411	5.82206	0.29777	1.73363	2
0000056_38.tif	control	18.797	8.495	5.77217	0.29777	1.71878	2
0000056_38.tif	control	20.37	12.783	6.63932	0.29777	1.97699	2
0000056_38.tif	control	20.724	11.8	6.87227	0.29777	2.04636	2
0000056_38.tif	control	20.703	11.655	6.84614	0.29777	2.03857	2
0000056_38.tif	control	21.078	12.148	7.24947	0.29777	2.15868	2
0000056_38.tif	control	21.078	12.05	7.24115	0.29777	2.1562	2
0000056_38.tif	control	22.189	12.238	8.36405	0.29777	2.49056	2
0000056_38.tif	control	22.168	11.96	8.32262	0.29777	2.47823	2
0000056_38.tif	control	21.627	11.668	7.77018	0.29777	2.31373	2
0000056_38.tif	control	21.446	11.335	7.58846	0.29777	2.25962	2
0000056_38.tif	control	19.148	4.095	9.08685	0.29777	2.70579	2
0000056_38.tif	control	22.672	10.672	8.85033	0.29777	2.63536	2
0000056_38.tif	control	22.693	10.609	8.87723	0.29777	2.64337	2
0000056_92.tif	control	4.375	12.24	9.87567	0.29777	2.94068	6
0000056_92.tif	control	4.307	12.363	9.95547	0.29777	2.96444	6
0000056_92.tif	control	5.453	12.536	8.83863	0.29777	2.63188	6
0000056_92.tif	control	5.842	11.939	8.38865	0.29777	2.49789	6
0000056_92.tif	control	6.245	11.96	7.98844	0.29777	2.37872	6
0000056_92.tif	control	6.314	12.641	8.00327	0.29777	2.38313	6
0000056_92.tif	control	6.523	12.231	7.73846	0.29777	2.30428	6
0000056_92.tif	control	6.523	11.877	7.70494	0.29777	2.2943	6
0000056_92.tif	control	6.543	11.759	7.67739	0.29777	2.2861	6
0000056_92.tif	control	6.543	11.759	7.67739	0.29777	2.2861	6
0000056_92.tif	control	6.606	11.988	7.63103	0.29777	2.27229	6
0000056_92.tif	control	6.786	11.981	7.45111	0.29777	2.21872	6
0000056_92.tif	control	6.849	12.62	7.47242	0.29777	2.22506	6
0000056_92.tif	control	7.856	12.335	6.43211	0.29777	1.91529	6
0000056_92.tif	control	7.905	12.252	6.37109	0.29777	1.89712	6
0000056_92.tif	control	7.891	12.821	6.49219	0.29777	1.93318	6
0000056_92.tif	control	7.127	14.391	7.71707	0.29777	2.29791	6
0000056_92.tif	control	7.523	14.411	7.36376	0.29777	2.19271	6
0000056_92.tif	control	6.953	15.807	8.52885	0.29777	2.53964	6
0000056_92.tif	control	8.738	14.835	6.50039	0.29777	1.93562	6
0000056_92.tif	control	8.856	8.984	5.84079	0.29777	1.73921	6
0000056_92.tif	control	9.203	8.929	5.54809	0.29777	1.65205	6
0000056_92.tif	control	10.168	6.137	6.5739	0.29777	1.95751	6
0000056_92.tif	control	13.182	5.734	5.68239	0.29777	1.69205	6
0000056_92.tif	control	13.245	7.554	3.89008	0.29777	1.15835	6
0000056_92.tif	control	13.689	7.498	3.86005	0.29777	1.14941	6
0000056_92.tif	control	13.432	9.151	2.30646	0.29777	0.686795	6
0000056_92.tif	control	11.655	9.408	3.1914	0.29777	0.950303	6
0000056_92.tif	control	11.293	9.797	3.29027	0.29777	0.979745	6
0000056_92.tif	control	15.196	8.561	2.93339	0.29777	0.873476	6
0000056_92.tif	control	15.328	8.436	3.09664	0.29777	0.922086	6
0000056_92.tif	control	15.148	8.068	3.38801	0.29777	1.00885	6
0000056_92.tif	control	15.286	10.762	1.21524	0.29777	0.361862	6
0000056_92.tif	control	13.203	11.616	1.04684	0.29777	0.311718	6
0000056_92.tif	control	13.245	11.762	1.05834	0.29777	0.315143	6
0000056_92.tif	control	13.134	11.88	1.20985	0.29777	0.360256	6
0000056_92.tif	control	14.071	13.269	1.95082	0.29777	0.580895	6
0000056_92.tif	control	14.543	13.512	2.21449	0.29777	0.659407	6
0000056_92.tif	control	15.161	14.172	3.00417	0.29777	0.89455	6
0000056_92.tif	control	15.182	14.255	3.08955	0.29777	0.919974	6
0000056_92.tif	control	8.453	16.495	7.73755	0.29777	2.30401	6
0000056_92.tif	control	10.495	18.102	7.72924	0.29777	2.30154	6
0000056_92.tif	control	10.578	17.998	7.59819	0.29777	2.26251	6
0000056_92.tif	control	10.557	17.047	6.78925	0.29777	2.02164	6
0000056_92.tif	control	13.175	16.415	5.19572	0.29777	1.54713	6
0000056_92.tif	control	13.599	16.165	4.88015	0.29777	1.45316	6
0000056_92.tif	control	13.905	16.443	5.12896	0.29777	1.52725	6
0000056_92.tif	control	14.155	16.269	4.94628	0.29777	1.47285	6
0000056_92.tif	control	12.849	18.283	7.09144	0.29777	2.11162	6
0000056_92.tif	control	12.849	18.283	7.09144	0.29777	2.11162	6
0000056_92.tif	control	12.78	18.116	6.94147	0.29777	2.06696	6
0000056_92.tif	control	12.891	18.193	6.9951	0.29777	2.08293	6
0000056_92.tif	control	12.884	18.45	7.24894	0.29777	2.15852	6
0000056_92.tif	control	13.432	18.054	6.77558	0.29777	2.01757	6
0000056_92.tif	control	13.481	18.554	7.26745	0.29777	2.16403	6
0000056_92.tif	control	15.28	17.589	6.35704	0.29777	1.89294	6
0000056_92.tif	control	15.335	17.464	6.24356	0.29777	1.85914	6
0000056_92.tif	control	11.245	19.113	8.33447	0.29777	2.48176	6
0000056_92.tif	control	11.946	19.418	8.4051	0.29777	2.50279	6
0000056_92.tif	control	12.953	19.245	8.02079	0.29777	2.38835	6
0000056_92.tif	control	13.252	18.703	7.44166	0.29777	2.2159	6
0000056_92.tif	control	7.943	16.641	8.21775	0.29777	2.447	6
0000056_92.tif	control	16.193	15.047	4.22	0.29777	1.25659	6
0000056_92.tif	control	16.359	14.936	4.20483	0.29777	1.25207	6
0000056_92.tif	control	16.616	14.512	3.99602	0.29777	1.1899	6
0000056_92.tif	control	16.561	14.332	3.81978	0.29777	1.13741	6
0000056_92.tif	control	16.359	14.318	3.68739	0.29777	1.09799	6
0000056_92.tif	control	17.137	13.054	3.40226	0.29777	1.01309	6
0000056_92.tif	control	17.262	12.977	3.47313	0.29777	1.03419	6
0000056_92.tif	control	17.116	12.936	3.32539	0.29777	0.990202	6
0000056_92.tif	control	17.665	12.984	3.83533	0.29777	1.14205	6
0000056_92.tif	control	17.679	12.804	3.77375	0.29777	1.12371	6
0000056_92.tif	control	18.359	13.339	4.61466	0.29777	1.37411	6
0000056_92.tif	control	18.47	13.325	4.70878	0.29777	1.40213	6
0000056_92.tif	control	17.005	11.922	2.86042	0.29777	0.851748	6
0000056_92.tif	control	17.102	11.7	2.91845	0.29777	0.869028	6
0000056_92.tif	control	16.554	10.498	2.48683	0.29777	0.740504	6
0000056_92.tif	control	16.811	10.589	2.70451	0.29777	0.805321	6
0000056_92.tif	control	17.068	10.533	2.9671	0.29777	0.883514	6
0000056_92.tif	control	17.297	10.63	3.16578	0.29777	0.942675	6
0000056_92.tif	control	20.29	11.908	6.11007	0.29777	1.8194	6
0000056_92.tif	control	20.019	11.727	5.82503	0.29777	1.73452	6
0000056_92.tif	control	20.144	11.297	5.93606	0.29777	1.76758	6
0000056_92.tif	control	19.443	10.839	5.25733	0.29777	1.56547	6
0000056_92.tif	control	19.804	10.47	5.66064	0.29777	1.68557	6
0000056_92.tif	control	19.526	10.2	5.43528	0.29777	1.61846	6
0000056_92.tif	control	19.554	10.089	5.48657	0.29777	1.63374	6
0000056_92.tif	control	19.297	9.741	5.32923	0.29777	1.58688	6
0000056_92.tif	control	15.776	8.387	3.32847	0.29777	0.991119	6
0000056_92.tif	control	16.227	8.519	3.45525	0.29777	1.02887	6
0000056_92.tif	control	15.484	7.082	4.4288	0.29777	1.31876	6
0000056_92.tif	control	15.345	6.943	4.52517	0.29777	1.34746	6
0000056_92.tif	control	17.38	6.964	5.39096	0.29777	1.60527	6
0000056_92.tif	control	17.38	6.964	5.39096	0.29777	1.60527	6
0000056_92.tif	control	17.186	6.72	5.48234	0.29777	1.63248	6
0000056_92.tif	control	19.061	4.967	7.9969	0.29777	2.38124	6
0000056_92.tif	control	19.04	4.814	8.1065	0.29777	2.41387	6
0000056_92.tif	control	21.141	15.495	8.09148	0.29777	2.4094	6
0000056_92.tif	control	21.422	15.464	8.31803	0.29777	2.47686	6
0000056_92.tif	control	23.161	12.995	9.10779	0.29777	2.71203	6
0000058_82.tif	control	8.818	17.609	7.94863	0.29777	2.36686	3
0000058_82.tif	control	9.432	15.469	5.90647	0.29777	1.75877	3
0000058_82.tif	control	8.464	15.089	6.3699	0.29777	1.89676	3
0000058_82.tif	control	7.583	14.839	6.95165	0.29777	2.06999	3
0000058_82.tif	control	7.557	14.688	6.89579	0.29777	2.05336	3
0000058_82.tif	control	7.656	14.641	6.78665	0.29777	2.02086	3
0000058_82.tif	control	9.276	13.502	4.81481	0.29777	1.4337	3
0000058_82.tif	control	9.144	13.398	4.88281	0.29777	1.45396	3
0000058_82.tif	control	10.63	1.396	10.1968	0.29777	3.03629	3
0000058_82.tif	control	10.521	2.984	8.72077	0.29777	2.59678	3
0000058_82.tif	control	10.443	3.104	8.63532	0.29777	2.57134	3
0000058_82.tif	control	10.073	5.005	7.06154	0.29777	2.10272	3
0000058_82.tif	control	9.578	6.781	5.89166	0.29777	1.75436	3
0000058_82.tif	control	9.469	7.198	5.664	0.29777	1.68657	3
0000058_82.tif	control	8.531	7.885	5.95915	0.29777	1.77446	3
0000058_82.tif	control	8.651	7.964	5.81548	0.29777	1.73168	3
0000058_82.tif	control	9.943	7.333	5.23751	0.29777	1.55957	3
0000058_82.tif	control	10.073	7.318	5.16145	0.29777	1.53693	3
0000058_82.tif	control	10.198	16.104	5.92421	0.29777	1.76405	3
0000058_82.tif	control	10.333	16.12	5.86362	0.29777	1.74601	3
0000058_82.tif	control	11.531	14.891	4.1969	0.29777	1.24971	3
0000058_82.tif	control	12.151	12.76	2.07278	0.29777	0.617212	3
0000058_82.tif	control	12.016	12.693	2.11437	0.29777	0.629596	3
0000058_82.tif	control	12.682	12.281	1.36703	0.29777	0.40706	3
0000058_82.tif	control	12.823	10.349	1.07027	0.29777	0.318694	3
0000058_82.tif	control	12.005	1.688	9.61021	0.29777	2.86163	3
0000058_82.tif	control	12	1.521	9.77599	0.29777	2.911	3
0000058_82.tif	control	12.078	1.568	9.71786	0.29777	2.89369	3
0000058_82.tif	control	14.146	1.318	9.88546	0.29777	2.94359	3
0000058_82.tif	control	14.125	1.354	9.84817	0.29777	2.93249	3
0000058_82.tif	control	14.812	9.349	2.25707	0.29777	0.672089	3
0000058_82.tif	control	13.75	9.661	1.54223	0.29777	0.459229	3
0000058_82.tif	control	13.604	9.734	1.4521	0.29777	0.432391	3
0000058_82.tif	control	14.339	12.76	1.78953	0.29777	0.532869	3
0000058_82.tif	control	14.328	13.083	2.0755	0.29777	0.618021	3
0000058_82.tif	control	13.703	12.505	1.33925	0.29777	0.398789	3
0000058_82.tif	control	13.734	12.432	1.27264	0.29777	0.378955	3
0000058_82.tif	control	15.339	12.958	2.56018	0.29777	0.762344	3
0000058_82.tif	control	15.141	16.557	5.62138	0.29777	1.67388	3
0000058_82.tif	control	15.292	16.677	5.78137	0.29777	1.72152	3
0000058_82.tif	control	18.88	14.375	6.26047	0.29777	1.86418	3
0000058_82.tif	control	18.703	5.13	7.98436	0.29777	2.3775	3
0000058_82.tif	control	18.823	5.031	8.13771	0.29777	2.42317	3
0000058_82.tif	control	17.115	3.536	8.45965	0.29777	2.51903	3
0000058_82.tif	control	20.578	10.255	7.1434	0.29777	2.12709	3
0000058_82.tif	control	20.939	10.616	7.46549	0.29777	2.223	3
0000058_82.tif	control	22.224	12.04	8.77107	0.29777	2.61176	3
0000058_82.tif	control	22.009	12.179	8.57218	0.29777	2.55254	3
0000058_82.tif	control	21.87	12.019	8.41672	0.29777	2.50625	3
0000058_82.tif	control	22.696	14.269	9.70505	0.29777	2.88987	3
0000058_82.tif	control	22.175	14.609	9.33203	0.29777	2.7788	3
0000058_82.tif	control	20.335	15.339	8.00414	0.29777	2.38339	3
0000058_82.tif	control	21.967	16.276	9.88553	0.29777	2.94361	3
0000061_86.tif	predator	9.568	5.604	8.34586	0.29777	2.48515	3
0000061_86.tif	predator	9.646	5.688	8.2317	0.29777	2.45115	3
0000061_86.tif	predator	8.615	7.609	8.00289	0.29777	2.38302	3
0000061_86.tif	predator	6.964	7.807	9.43621	0.29777	2.80982	3
0000061_86.tif	predator	9.021	11.646	6.77092	0.29777	2.01618	3
0000061_86.tif	predator	11.766	15.943	6.22473	0.29777	1.85354	3
0000061_86.tif	predator	11	9.141	5.19383	0.29777	1.54657	3
0000061_86.tif	predator	11.443	9.193	4.7677	0.29777	1.41968	3
0000061_86.tif	predator	15.99	1.833	9.35145	0.29777	2.78458	3
0000061_86.tif	predator	15.318	1.979	9.21439	0.29777	2.74377	3
0000061_86.tif	predator	16.609	6.724	4.53516	0.29777	1.35043	3
0000061_86.tif	predator	16.224	7.609	3.60098	0.29777	1.07226	3
0000061_86.tif	predator	16.62	8.396	2.91104	0.29777	0.866819	3
0000061_86.tif	predator	15.656	8.417	2.7676	0.29777	0.824109	3
0000061_86.tif	predator	15.625	8.578	2.60837	0.29777	0.776696	3
0000061_86.tif	predator	14.63	8.646	2.78291	0.29777	0.828668	3
0000061_86.tif	predator	14.078	9.052	2.72399	0.29777	0.811122	3
0000061_86.tif	predator	14.453	9.172	2.40633	0.29777	0.716533	3
0000061_86.tif	predator	15.099	9.573	1.74563	0.29777	0.519795	3
0000061_86.tif	predator	14.245	10.115	1.86613	0.29777	0.555678	3
0000061_86.tif	predator	13.443	11.052	2.33662	0.29777	0.695775	3
0000061_86.tif	predator	14.854	11.323	0.932719	0.29777	0.277736	3
0000061_86.tif	predator	14.047	11.948	1.89108	0.29777	0.563108	3
0000061_86.tif	predator	13.547	12.682	2.68672	0.29777	0.800023	3
0000061_86.tif	predator	15.469	18.865	7.68913	0.29777	2.28959	3
0000061_86.tif	predator	15.349	18.896	7.72581	0.29777	2.30051	3
0000061_86.tif	predator	20.271	17.193	7.50581	0.29777	2.235	3
0000061_86.tif	predator	20.333	17.052	7.43123	0.29777	2.2128	3
0000061_86.tif	predator	19.609	16.729	6.74248	0.29777	2.00771	3
0000061_86.tif	predator	18.979	16.031	5.81137	0.29777	1.73045	3
0000061_86.tif	predator	18.318	15.594	5.09191	0.29777	1.51622	3
0000061_86.tif	predator	18.167	14.995	4.50065	0.29777	1.34016	3
0000061_86.tif	predator	18.844	14.844	4.77733	0.29777	1.42255	3
0000061_86.tif	predator	19.87	14.182	5.07551	0.29777	1.51134	3
0000061_86.tif	predator	18.786	13.599	3.86031	0.29777	1.14948	3
0000061_86.tif	predator	17.229	9.26	2.40942	0.29777	0.717452	3
0000061_86.tif	predator	17.469	9.344	2.4989	0.29777	0.744097	3
0000061_86.tif	predator	18.521	8.917	3.55883	0.29777	1.05971	3
0000061_86.tif	predator	19	9.193	3.78818	0.29777	1.12801	3
0000061_86.tif	predator	19.234	9.349	3.91378	0.29777	1.16541	3
0000061_86.tif	predator	19.87	4.641	7.71657	0.29777	2.29776	3
0000061_86.tif	predator	18.547	3.828	7.85874	0.29777	2.3401	3
0000061_86.tif	predator	19.516	3.703	8.362	0.29777	2.48995	3
0000061_86.tif	predator	21.286	4.938	8.32752	0.29777	2.47969	3
0000061_86.tif	predator	23.401	9.167	7.88675	0.29777	2.34844	3
0000061_86.tif	predator	23.385	9.266	7.84652	0.29777	2.33646	3
0000061_86.tif	predator	20.849	14.74	6.19635	0.29777	1.84509	3
0000061_86.tif	predator	20.734	15.87	6.82342	0.29777	2.03181	3
0000063_73.tif	control	6.688	16.24	9.00316	0.29777	2.68087	5
0000063_73.tif	control	6.682	16.089	8.9272	0.29777	2.65825	5
0000063_73.tif	control	9.391	16.411	7.01307	0.29777	2.08828	5
0000063_73.tif	control	11.005	14.932	4.83033	0.29777	1.43833	5
0000063_73.tif	control	10.036	14.839	5.46837	0.29777	1.62832	5
0000063_73.tif	control	9.755	14.339	5.39585	0.29777	1.60672	5
0000063_73.tif	control	9.786	14.172	5.27905	0.29777	1.57194	5
0000063_73.tif	control	9.589	14.13	5.42504	0.29777	1.61542	5
0000063_73.tif	control	9.109	13.839	5.71009	0.29777	1.70029	5
0000063_73.tif	control	10.099	13.526	4.68491	0.29777	1.39503	5
0000063_73.tif	control	10.422	13.391	4.33624	0.29777	1.2912	5
0000063_73.tif	control	10.422	13.391	4.33624	0.29777	1.2912	5
0000063_73.tif	control	10.547	13.359	4.21097	0.29777	1.2539	5
0000063_73.tif	control	10.984	13.964	4.18077	0.29777	1.24491	5
0000063_73.tif	control	11.339	13.609	3.68225	0.29777	1.09646	5
0000063_73.tif	control	11.359	13.443	3.56676	0.29777	1.06208	5
0000063_73.tif	control	11.203	13.391	3.66518	0.29777	1.09138	5
0000063_73.tif	control	11.349	13.12	3.39626	0.29777	1.0113	5
0000063_73.tif	control	12.339	12.766	2.37606	0.29777	0.70752	5
0000063_73.tif	control	8.026	12.911	6.41579	0.29777	1.91043	5
0000063_73.tif	control	8.818	11.547	5.43543	0.29777	1.61851	5
0000063_73.tif	control	6.901	10.057	7.46257	0.29777	2.22213	5
0000063_73.tif	control	7.516	9.089	7.10472	0.29777	2.11557	5
0000063_73.tif	control	8.464	8.547	6.43094	0.29777	1.91494	5
0000063_73.tif	control	9.217	10.297	5.14279	0.29777	1.53137	5
0000063_73.tif	control	11.585	7.484	4.69884	0.29777	1.39917	5
0000063_73.tif	control	11.696	7.457	4.65935	0.29777	1.38741	5
0000063_73.tif	control	11.571	10.026	2.99009	0.29777	0.890358	5
0000063_73.tif	control	11.62	9.936	2.98791	0.29777	0.889711	5
0000063_73.tif	control	11.807	10.109	2.74195	0.29777	0.81647	5
0000063_73.tif	control	12.009	10.089	2.57338	0.29777	0.766277	5
0000063_73.tif	control	12.161	10.165	2.40367	0.29777	0.715742	5
0000063_73.tif	control	12.009	9.95	2.64448	0.29777	0.787448	5
0000063_73.tif	control	12.314	9.894	2.42481	0.29777	0.722035	5
0000063_73.tif	control	12.328	10.339	2.17355	0.29777	0.647217	5
0000063_73.tif	control	12.384	10.714	1.9727	0.29777	0.587412	5
0000063_73.tif	control	13.078	10.637	1.37393	0.29777	0.409114	5
0000063_73.tif	control	12.981	10.422	1.57448	0.29777	0.468833	5
0000063_73.tif	control	13.446	12.151	1.13209	0.29777	0.337102	5
0000063_73.tif	control	13.599	12.158	1.03451	0.29777	0.308047	5
0000063_73.tif	control	18.665	5.575	7.27249	0.29777	2.16553	5
0000063_73.tif	control	17.957	6.304	6.26453	0.29777	1.86539	5
0000063_73.tif	control	18.054	6.269	6.3504	0.29777	1.89096	5
0000063_73.tif	control	17.568	6.727	5.6937	0.29777	1.69541	5
0000063_73.tif	control	17.707	6.748	5.759	0.29777	1.71486	5
0000063_73.tif	control	17.783	7.054	5.56526	0.29777	1.65717	5
0000063_73.tif	control	17.116	7.825	4.54618	0.29777	1.35372	5
0000063_73.tif	control	16.123	8.248	3.62703	0.29777	1.08002	5
0000063_73.tif	control	16.026	8.283	3.54756	0.29777	1.05636	5
0000063_73.tif	control	15.637	9.293	2.48425	0.29777	0.739735	5
0000063_73.tif	control	16.47	10.405	2.41433	0.29777	0.718916	5
0000063_73.tif	control	16.227	10.828	2.04578	0.29777	0.609171	5
0000063_73.tif	control	17.227	10.106	3.22801	0.29777	0.961204	5
0000063_73.tif	control	17.512	9.828	3.60129	0.29777	1.07236	5
0000063_73.tif	control	17.644	9.856	3.70988	0.29777	1.10469	5
0000063_73.tif	control	17.734	9.28	4.05459	0.29777	1.20734	5
0000063_73.tif	control	17.609	8.911	4.15345	0.29777	1.23677	5
0000063_73.tif	control	18.602	11.245	4.35336	0.29777	1.2963	5
0000063_73.tif	control	18.748	11.286	4.49851	0.29777	1.33952	5
0000063_73.tif	control	19.095	11.043	4.85497	0.29777	1.44566	5
0000063_73.tif	control	18.95	13.023	4.98754	0.29777	1.48514	5
0000063_73.tif	control	19.512	12.898	5.48385	0.29777	1.63293	5
0000063_73.tif	control	16.95	14.578	4.20526	0.29777	1.2522	5
0000063_73.tif	control	17.005	14.46	4.15178	0.29777	1.23627	5
0000063_73.tif	control	18.269	13.96	4.78995	0.29777	1.4263	5
0000063_73.tif	control	18.429	13.988	4.93984	0.29777	1.47094	5
0000063_73.tif	control	18.776	14.578	5.55687	0.29777	1.65467	5
0000063_73.tif	control	19.151	13.849	5.49953	0.29777	1.63759	5
0000063_73.tif	control	19.297	13.439	5.46072	0.29777	1.62604	5
0000063_73.tif	control	19.227	13.307	5.34647	0.29777	1.59202	5
0000063_73.tif	control	14.054	14.05	2.70312	0.29777	0.804907	5
0000063_73.tif	control	13.651	16.002	4.68644	0.29777	1.39548	5
0000063_73.tif	control	13.873	16.002	4.66326	0.29777	1.38858	5
0000063_73.tif	control	15.262	15.988	4.74322	0.29777	1.41239	5
0000063_73.tif	control	13.575	18.804	7.48052	0.29777	2.22747	5
0000063_73.tif	control	13.623	17.151	5.83081	0.29777	1.73624	5
0000063_73.tif	control	13.595	17.214	5.89649	0.29777	1.7558	5
0000063_73.tif	control	15.227	16.436	5.17506	0.29777	1.54098	5
0000063_73.tif	control	15.352	16.45	5.21379	0.29777	1.55251	5
0000063_73.tif	control	16.811	17.116	6.3055	0.29777	1.87759	5
0000063_73.tif	control	16.595	18.116	7.15707	0.29777	2.13116	5
0000063_73.tif	control	17.755	16.741	6.42688	0.29777	1.91373	5
0000063_73.tif	control	17.901	16.832	6.58318	0.29777	1.96027	5
0000063_73.tif	control	18.102	16.901	6.7533	0.29777	2.01093	5
0000063_73.tif	control	18.29	16.575	6.60155	0.29777	1.96574	5
0000063_73.tif	control	21.03	19.328	10.4668	0.29777	3.11669	5
0000063_73.tif	control	22.155	17.495	10.01	0.29777	2.98069	5
0000063_73.tif	control	22.641	16.995	10.1109	0.29777	3.01071	5
0000063_73.tif	control	22.043	16.37	9.26775	0.29777	2.75966	5
0000063_73.tif	control	21.821	16.071	8.92021	0.29777	2.65617	5
0000063_73.tif	control	21.759	15.96	8.8091	0.29777	2.62309	5
0000063_73.tif	control	21.995	15.335	8.70824	0.29777	2.59305	5
0000063_73.tif	control	22.849	12.981	8.75157	0.29777	2.60595	5
0000063_73.tif	control	21.891	5.37	9.70531	0.29777	2.88995	5
0000063_73.tif	control	22.068	5.182	9.96066	0.29777	2.96599	5
0000063_73.tif	control	20.286	9.443	6.33129	0.29777	1.88527	5
0000063_95.tif	predator	4.26	13.781	9.80687	0.29777	2.92019	6
0000063_95.tif	predator	6.839	14.481	7.64299	0.29777	2.27585	6
0000063_95.tif	predator	7.255	15.106	7.58313	0.29777	2.25803	6
0000063_95.tif	predator	7.783	15.161	7.17133	0.29777	2.13541	6
0000063_95.tif	predator	8.054	15.627	7.23195	0.29777	2.15346	6
0000063_95.tif	predator	9.068	12.863	4.94998	0.29777	1.47396	6
0000063_95.tif	predator	8.797	12.599	5.12063	0.29777	1.52477	6
0000063_95.tif	predator	8.568	12.745	5.38284	0.29777	1.60285	6
0000063_95.tif	predator	8.547	5.148	7.86738	0.29777	2.34267	6
0000063_95.tif	predator	8.665	5.002	7.9028	0.29777	2.35322	6
0000063_95.tif	predator	10.505	4.668	7.17782	0.29777	2.13734	6
0000063_95.tif	predator	12.144	6.075	5.25737	0.29777	1.56549	6
0000063_95.tif	predator	13.394	6.637	4.47201	0.29777	1.33163	6
0000063_95.tif	predator	13.623	6.672	4.42755	0.29777	1.31839	6
0000063_95.tif	predator	13.769	6.741	4.35866	0.29777	1.29788	6
0000063_95.tif	predator	13.825	6.63	4.47095	0.29777	1.33131	6
0000063_95.tif	predator	13.714	6.519	4.58005	0.29777	1.3638	6
0000063_95.tif	predator	13.7	6.089	5.01	0.29777	1.49183	6
0000063_95.tif	predator	13.762	8.22	2.87983	0.29777	0.857526	6
0000063_95.tif	predator	11.061	7.936	4.11485	0.29777	1.22528	6
0000063_95.tif	predator	15.339	3.908	7.37698	0.29777	2.19664	6
0000063_95.tif	predator	14.047	2.297	8.80912	0.29777	2.62309	6
0000063_95.tif	predator	14.845	8.352	2.97878	0.29777	0.88699	6
0000063_95.tif	predator	13.616	8.422	2.67811	0.29777	0.79746	6
0000063_95.tif	predator	13.644	8.88	2.21954	0.29777	0.660913	6
0000063_95.tif	predator	14.026	9.693	1.4449	0.29777	0.430247	6
0000063_95.tif	predator	14.526	9.464	1.83497	0.29777	0.546399	6
0000063_95.tif	predator	13.693	10.408	0.691	0.29777	0.205759	6
0000063_95.tif	predator	12.04	10.22	1.87218	0.29777	0.557478	6
0000063_95.tif	predator	12.193	8.575	2.93608	0.29777	0.874277	6
0000063_95.tif	predator	12.637	8.554	2.75539	0.29777	0.820472	6
0000063_95.tif	predator	12.547	8.498	2.84227	0.29777	0.846344	6
0000063_95.tif	predator	13.922	13.811	2.72165	0.29777	0.810426	6
0000063_95.tif	predator	12.561	14.693	3.76806	0.29777	1.12201	6
0000063_95.tif	predator	12.443	14.727	3.8373	0.29777	1.14263	6
0000063_95.tif	predator	13.019	15.887	4.83521	0.29777	1.43978	6
0000063_95.tif	predator	14.075	15.845	4.76135	0.29777	1.41779	6
0000063_95.tif	predator	14.345	14.568	3.52974	0.29777	1.05105	6
0000063_95.tif	predator	14.63	14.394	3.42564	0.29777	1.02005	6
0000063_95.tif	predator	14.741	14.672	3.72352	0.29777	1.10875	6
0000063_95.tif	predator	14.665	14.88	3.90394	0.29777	1.16248	6
0000063_95.tif	predator	12.887	16.825	5.78245	0.29777	1.72184	6
0000063_95.tif	predator	13.915	18.026	6.93056	0.29777	2.06371	6
0000063_95.tif	predator	11.783	17.72	6.89099	0.29777	2.05193	6
0000063_95.tif	predator	18.734	19.741	10.0048	0.29777	2.97913	6
0000063_95.tif	predator	19.589	18.97	9.8344	0.29777	2.92839	6
0000063_95.tif	predator	18.512	18.04	8.44987	0.29777	2.51612	6
0000063_95.tif	predator	16.804	17.859	7.4415	0.29777	2.21586	6
0000063_95.tif	predator	15.755	18.13	7.32713	0.29777	2.1818	6
0000063_95.tif	predator	19.345	15.769	7.33171	0.29777	2.18316	6
0000063_95.tif	predator	19.554	15.769	7.49401	0.29777	2.23149	6
0000063_95.tif	predator	16.47	15.505	5.20812	0.29777	1.55082	6
0000063_95.tif	predator	15.609	13.707	3.23616	0.29777	0.963631	6
0000063_95.tif	predator	15.929	13.595	3.35108	0.29777	0.99785	6
0000063_95.tif	predator	16.693	14.408	4.46648	0.29777	1.32998	6
0000063_95.tif	predator	17.637	13.887	4.82992	0.29777	1.4382	6
0000063_95.tif	predator	19.359	12.38	5.809	0.29777	1.72975	6
0000063_95.tif	predator	19.359	12.248	5.78133	0.29777	1.72151	6
0000063_95.tif	predator	15.811	12.408	2.48986	0.29777	0.741406	6
0000063_95.tif	predator	15.936	12.137	2.47154	0.29777	0.735949	6
0000063_95.tif	predator	16.172	10.13	2.66165	0.29777	0.792561	6
0000063_95.tif	predator	15.922	8.234	3.62997	0.29777	1.0809	6
0000063_95.tif	predator	15.825	8.158	3.63248	0.29777	1.08164	6
0000063_95.tif	predator	16.109	7.134	4.64309	0.29777	1.38257	6
0000063_95.tif	predator	18.554	6.974	6.37534	0.29777	1.89838	6
0000063_95.tif	predator	19.241	5.71	7.73444	0.29777	2.30309	6
0000063_95.tif	predator	16.123	2.675	8.76748	0.29777	2.61069	6
0000063_95.tif	predator	17.089	2.939	8.83846	0.29777	2.63183	6
0000063_95.tif	predator	20.984	5.675	9.08727	0.29777	2.70592	6
0000063_95.tif	predator	20.026	10.043	6.42044	0.29777	1.91181	6
0000063_95.tif	predator	23.519	12.595	9.93923	0.29777	2.9596	6
0000063_95.tif	predator	23.602	12.561	10.0163	0.29777	2.98255	6
0000063_95.tif	predator	22.22	14.582	9.21092	0.29777	2.74274	6
0000063_95.tif	predator	21.477	17.484	10.0677	0.29777	2.99786	6
0000074_59.tif	predator	8.667	7.542	6.86903	0.29777	2.04539	4
0000074_59.tif	predator	9.057	8.839	5.9122	0.29777	1.76048	4
0000074_59.tif	predator	7.776	9.484	6.91422	0.29777	2.05885	4
0000074_59.tif	predator	11.255	9.099	3.85022	0.29777	1.14648	4
0000074_59.tif	predator	11.37	9.047	3.78436	0.29777	1.12687	4
0000074_59.tif	predator	11.797	10.755	2.71199	0.29777	0.807549	4
0000074_59.tif	predator	11.224	12.266	3.40973	0.29777	1.01531	4
0000074_59.tif	predator	9.37	12.911	5.3724	0.29777	1.59974	4
0000074_59.tif	predator	6.995	12.318	7.55437	0.29777	2.24946	4
0000074_59.tif	predator	7.026	11.224	7.443	0.29777	2.2163	4
0000074_59.tif	predator	6.422	13.839	8.46278	0.29777	2.51996	4
0000074_59.tif	predator	4.703	13.62	10.0568	0.29777	2.99462	4
0000074_59.tif	predator	5.234	14.661	9.85559	0.29777	2.9347	4
0000074_59.tif	predator	7.62	19.328	10.6144	0.29777	3.16064	4
0000074_59.tif	predator	11.578	16.38	5.91556	0.29777	1.76148	4
0000074_59.tif	predator	11.464	16.391	5.98161	0.29777	1.78114	4
0000074_59.tif	predator	10.578	14.307	4.96746	0.29777	1.47916	4
0000074_59.tif	predator	9.984	20.276	10.1067	0.29777	3.00946	4
0000074_59.tif	predator	9.974	20.38	10.2044	0.29777	3.03855	4
0000074_59.tif	predator	16.964	17.276	6.55075	0.29777	1.95062	4
0000074_59.tif	predator	17.37	14.911	4.69539	0.29777	1.39815	4
0000074_59.tif	predator	16.568	14.318	3.74294	0.29777	1.11454	4
0000074_59.tif	predator	16.453	14.38	3.73205	0.29777	1.11129	4
0000074_59.tif	predator	12.703	13.203	2.65613	0.29777	0.790915	4
0000074_59.tif	predator	16.651	13.266	2.99188	0.29777	0.890891	4
0000074_59.tif	predator	20.714	15.089	7.3469	0.29777	2.18769	4
0000074_59.tif	predator	18.745	12.839	4.57259	0.29777	1.36158	4
0000074_59.tif	predator	18.609	12.745	4.41229	0.29777	1.31385	4
0000074_59.tif	predator	18.745	12.661	4.5126	0.29777	1.34372	4
0000074_59.tif	predator	18.932	12.724	4.70993	0.29777	1.40247	4
0000074_59.tif	predator	18.839	12.557	4.57025	0.29777	1.36088	4
0000074_59.tif	predator	19.776	11.484	5.31361	0.29777	1.58223	4
0000074_59.tif	predator	15.161	11.536	0.761152	0.29777	0.226648	4
0000074_59.tif	predator	16.464	11.901	2.10835	0.29777	0.627804	4
0000074_59.tif	predator	17.13	11.182	2.66126	0.29777	0.792443	4
0000074_59.tif	predator	17.193	11.036	2.73014	0.29777	0.812954	4
0000074_59.tif	predator	17.276	10.755	2.84509	0.29777	0.847183	4
0000074_59.tif	predator	15.766	10.172	1.66686	0.29777	0.496341	4
0000074_59.tif	predator	14.453	6.12	5.09903	0.29777	1.51834	4
0000074_59.tif	predator	14.422	6.026	5.19321	0.29777	1.54638	4
0000074_59.tif	predator	14.745	1.557	9.66594	0.29777	2.87823	4
0000074_59.tif	predator	21.745	8.38	7.81026	0.29777	2.32566	4
0000074_59.tif	predator	21.755	8.464	7.78947	0.29777	2.31947	4
0000074_59.tif	predator	21.568	10.339	7.15333	0.29777	2.13005	4
0000074_59.tif	predator	22.786	14.547	8.95813	0.29777	2.66746	4
0000074_59.tif	predator	21.724	16.286	8.84927	0.29777	2.63505	4
0000074_59.tif	predator	21.12	17.078	8.86362	0.29777	2.63932	4
0000079_37.tif	control	5.823	5.521	9.91612	0.29777	2.95272	3
0000079_37.tif	control	6.054	5.599	9.67991	0.29777	2.88239	3
0000079_37.tif	control	10.422	5.884	6.25003	0.29777	1.86107	3
0000079_37.tif	control	7.248	8.661	7.26056	0.29777	2.16198	3
0000079_37.tif	control	8.116	9.009	6.3279	0.29777	1.88426	3
0000079_37.tif	control	8.207	9.113	6.21045	0.29777	1.84929	3
0000079_37.tif	control	8.644	9.168	5.77652	0.29777	1.72007	3
0000079_37.tif	control	8.672	9.286	5.71545	0.29777	1.70189	3
0000079_37.tif	control	8.929	9.002	5.55957	0.29777	1.65547	3
0000079_37.tif	control	10.54	10.151	3.69195	0.29777	1.09935	3
0000079_37.tif	control	10.54	10.151	3.69195	0.29777	1.09935	3
0000079_37.tif	control	15.318	18.422	7.61518	0.29777	2.26757	3
0000079_37.tif	control	14.227	18.061	7.16535	0.29777	2.13363	3
0000079_37.tif	control	13.373	17.325	6.47651	0.29777	1.92851	3
0000079_37.tif	control	14.825	16.089	5.23592	0.29777	1.5591	3
0000079_37.tif	control	11.387	14.773	4.76429	0.29777	1.41866	3
0000079_37.tif	control	11.276	14.634	4.7188	0.29777	1.40512	3
0000079_37.tif	control	13.679	13.877	3.01892	0.29777	0.898944	3
0000079_37.tif	control	13.783	13.953	3.07967	0.29777	0.917034	3
0000079_37.tif	control	13.741	13.773	2.90678	0.29777	0.865551	3
0000079_37.tif	control	13.575	13.536	2.70318	0.29777	0.804925	3
0000079_37.tif	control	13.714	13.509	2.65012	0.29777	0.789126	3
0000079_37.tif	control	13.686	13.363	2.51137	0.29777	0.747811	3
0000079_37.tif	control	13.387	13.252	2.47833	0.29777	0.737971	3
0000079_37.tif	control	13.845	13.12	2.24564	0.29777	0.668684	3
0000079_37.tif	control	14.283	12.96	2.0679	0.29777	0.61576	3
0000079_37.tif	control	13.734	12.481	1.64022	0.29777	0.488407	3
0000079_37.tif	control	13.936	12.398	1.51803	0.29777	0.452023	3
0000079_37.tif	control	16.151	12.231	2.40047	0.29777	0.714788	3
0000079_37.tif	control	11.811	10.349	2.40795	0.29777	0.717016	3
0000079_37.tif	control	12.512	9.137	2.40766	0.29777	0.716928	3
0000079_37.tif	control	13.144	9.394	1.81112	0.29777	0.539297	3
0000079_37.tif	control	16.373	7.359	4.17438	0.29777	1.24301	3
0000079_37.tif	control	16.262	7.38	4.09847	0.29777	1.2204	3
0000079_37.tif	control	12.929	2.293	8.69006	0.29777	2.58764	3
0000079_37.tif	control	15.491	2.432	8.56864	0.29777	2.55148	3
0000079_37.tif	control	16.241	2.377	8.77044	0.29777	2.61157	3
0000079_37.tif	control	16.29	2.259	8.89673	0.29777	2.64918	3
0000079_37.tif	control	16.464	2.252	8.94682	0.29777	2.66409	3
0000079_37.tif	control	17.495	1.62	9.85866	0.29777	2.93561	3
0000079_37.tif	control	16.939	1.224	10.0644	0.29777	2.99688	3
0000079_37.tif	control	18.182	5.578	6.67007	0.29777	1.98615	3
0000079_37.tif	control	18.224	5.793	6.52604	0.29777	1.94326	3
0000079_37.tif	control	18.148	5.891	6.40204	0.29777	1.90633	3
0000079_37.tif	control	18.203	8.46	4.72359	0.29777	1.40654	3
0000079_37.tif	control	18.71	8.286	5.24891	0.29777	1.56297	3
0000079_37.tif	control	18.696	8.377	5.19201	0.29777	1.54602	3
0000079_37.tif	control	18.766	9.835	4.73052	0.29777	1.40861	3
0000079_37.tif	control	18.53	10.148	4.4375	0.29777	1.32135	3
0000079_37.tif	control	17.106	13.016	3.63275	0.29777	1.08173	3
0000079_37.tif	control	17.238	12.995	3.72888	0.29777	1.11035	3
0000079_37.tif	control	20.557	14.047	7.13454	0.29777	2.12445	3
0000079_37.tif	control	18.481	14.332	5.52374	0.29777	1.6448	3
0000079_37.tif	control	18.46	14.45	5.5817	0.29777	1.66206	3
0000079_37.tif	control	17.523	16.38	6.43513	0.29777	1.91619	3
0000079_37.tif	control	21.092	16.592	8.97511	0.29777	2.67252	3
0000079_37.tif	control	21.168	16.578	9.02515	0.29777	2.68742	3
0000079_37.tif	control	21.394	9.259	7.42081	0.29777	2.20969	3
0000081_42.tif	predator	6.078	5.686	10.1217	0.29777	3.01393	3
0000081_42.tif	predator	5.627	8.03	9.46313	0.29777	2.81784	3
0000081_42.tif	predator	7.655	9.415	7.10891	0.29777	2.11682	3
0000081_42.tif	predator	9.092	9.297	5.77375	0.29777	1.71925	3
0000081_42.tif	predator	8.967	8.797	6.07757	0.29777	1.80972	3
0000081_42.tif	predator	8.773	7.755	6.73643	0.29777	2.00591	3
0000081_42.tif	predator	5.946	5.582	10.2891	0.29777	3.0638	3
0000081_42.tif	predator	4.536	10.227	10.035	0.29777	2.98812	3
0000081_42.tif	predator	4.439	12.95	10.2151	0.29777	3.04175	3
0000081_42.tif	predator	8.585	15.349	7.19487	0.29777	2.14242	3
0000081_42.tif	predator	8.717	16.661	7.9137	0.29777	2.35646	3
0000081_42.tif	predator	8.092	17.609	9.02079	0.29777	2.68612	3
0000081_42.tif	predator	8.148	17.741	9.07456	0.29777	2.70213	3
0000081_42.tif	predator	10.891	19.464	8.95455	0.29777	2.6664	3
0000081_42.tif	predator	11.009	18.839	8.33655	0.29777	2.48237	3
0000081_42.tif	predator	11.793	18.568	7.78383	0.29777	2.31779	3
0000081_42.tif	predator	11.62	16.682	6.13283	0.29777	1.82617	3
0000081_42.tif	predator	13.266	16.509	5.38022	0.29777	1.60207	3
0000081_42.tif	predator	13.349	11.734	1.25366	0.29777	0.373301	3
0000081_42.tif	predator	13.12	10.741	1.49501	0.29777	0.445168	3
0000081_42.tif	predator	9.717	10.262	4.90496	0.29777	1.46055	3
0000081_42.tif	predator	14.766	7.641	3.64359	0.29777	1.08495	3
0000081_42.tif	predator	12.057	4.252	7.44199	0.29777	2.216	3
0000081_42.tif	predator	20.398	11.37	5.88275	0.29777	1.75171	3
0000081_42.tif	predator	19.023	9.335	4.90719	0.29777	1.46121	3
0000081_42.tif	predator	18.592	9.314	4.52363	0.29777	1.347	3
0000081_42.tif	predator	18.585	9.182	4.5762	0.29777	1.36265	3
0000081_42.tif	predator	17.835	17.005	6.62097	0.29777	1.97153	3
0000081_42.tif	predator	18.273	17.047	6.88618	0.29777	2.0505	3
0000081_42.tif	predator	18.87	17.693	7.75469	0.29777	2.30911	3
0000081_42.tif	predator	19.259	18.109	8.31781	0.29777	2.47679	3
0000081_42.tif	predator	19.946	16.984	7.87821	0.29777	2.34589	3
0000081_42.tif	predator	22.089	15.974	8.91188	0.29777	2.65369	3
0000081_42.tif	predator	24.057	12.286	9.59431	0.29777	2.8569	3
0000081_96.tif	predator	6.052	11.354	8.58277	0.29777	2.55569	6
0000081_96.tif	predator	6.075	11.231	8.55655	0.29777	2.54788	6
0000081_96.tif	predator	5.373	10.78	9.26148	0.29777	2.75779	6
0000081_96.tif	predator	6.609	12.37	8.12599	0.29777	2.41967	6
0000081_96.tif	predator	7.075	12.217	7.64187	0.29777	2.27552	6
0000081_96.tif	predator	7.179	13.474	7.82983	0.29777	2.33149	6
0000081_96.tif	predator	7.505	12.925	7.36302	0.29777	2.19249	6
0000081_96.tif	predator	8.005	11.925	6.6802	0.29777	1.98916	6
0000081_96.tif	predator	7.998	11.488	6.64529	0.29777	1.97877	6
0000081_96.tif	predator	8.609	11.863	6.07326	0.29777	1.80843	6
0000081_96.tif	predator	11.609	11.266	3.02748	0.29777	0.901493	6
0000081_96.tif	predator	6.644	8.474	8.39673	0.29777	2.50029	6
0000081_96.tif	predator	7.984	7.196	7.69166	0.29777	2.29035	6
0000081_96.tif	predator	10.498	7.752	5.29804	0.29777	1.5776	6
0000081_96.tif	predator	9.672	5.925	7.14368	0.29777	2.12717	6
0000081_96.tif	predator	9.686	5.842	7.19404	0.29777	2.14217	6
0000081_96.tif	predator	9.345	5.405	7.74602	0.29777	2.30653	6
0000081_96.tif	predator	9.519	4.627	8.22246	0.29777	2.4484	6
0000081_96.tif	predator	10.894	5.988	6.30588	0.29777	1.8777	6
0000081_96.tif	predator	11.339	5.543	6.43089	0.29777	1.91493	6
0000081_96.tif	predator	11.248	5.439	6.56685	0.29777	1.95541	6
0000081_96.tif	predator	8.762	3.932	9.23883	0.29777	2.75105	6
0000081_96.tif	predator	11.644	2.488	9.08475	0.29777	2.70516	6
0000081_96.tif	predator	9.512	15.158	6.55149	0.29777	1.95084	6
0000081_96.tif	predator	7.179	15.845	8.85083	0.29777	2.63551	6
0000081_96.tif	predator	10.554	15.359	5.91832	0.29777	1.7623	6
0000081_96.tif	predator	9.811	19.172	9.42855	0.29777	2.80754	6
0000081_96.tif	predator	13.686	19.2	8.18661	0.29777	2.43773	6
0000081_96.tif	predator	12.547	20.859	10.0101	0.29777	2.98071	6
0000081_96.tif	predator	12.679	20.811	9.93642	0.29777	2.95877	6
0000081_96.tif	predator	17.102	18.415	7.75172	0.29777	2.30823	6
0000081_96.tif	predator	17.797	16.839	6.58288	0.29777	1.96018	6
0000081_96.tif	predator	14.79	16.922	5.85619	0.29777	1.7438	6
0000081_96.tif	predator	14.484	15.977	4.91117	0.29777	1.4624	6
0000081_96.tif	predator	14.894	15.606	4.54567	0.29777	1.35356	6
0000081_96.tif	predator	14.769	15.519	4.45317	0.29777	1.32602	6
0000081_96.tif	predator	12.193	16.193	5.67491	0.29777	1.68982	6
0000081_96.tif	predator	11.783	13.189	3.55022	0.29777	1.05715	6
0000081_96.tif	predator	13.561	13.745	2.88255	0.29777	0.858337	6
0000081_96.tif	predator	17.929	12.814	3.73255	0.29777	1.11144	6
0000081_96.tif	predator	13.568	9.2	2.14878	0.29777	0.639843	6
0000081_96.tif	predator	14.818	9.755	1.32639	0.29777	0.394959	6
0000081_96.tif	predator	14.964	9.672	1.4354	0.29777	0.427419	6
0000081_96.tif	predator	15.207	9.714	1.47182	0.29777	0.438263	6
0000081_96.tif	predator	15.915	9.991	1.67665	0.29777	0.499256	6
0000081_96.tif	predator	15.748	9.123	2.24342	0.29777	0.668024	6
0000081_96.tif	predator	11.748	5.974	5.85276	0.29777	1.74278	6
0000081_96.tif	predator	15.477	6.905	4.24829	0.29777	1.26501	6
0000081_96.tif	predator	16.741	7.641	4.025	0.29777	1.19853	6
0000081_96.tif	predator	17.602	7.196	4.8811	0.29777	1.45345	6
0000081_96.tif	predator	16.7	5.578	5.86728	0.29777	1.7471	6
0000081_96.tif	predator	15.866	5.578	5.62741	0.29777	1.67568	6
0000081_96.tif	predator	11.79	2.543	8.98561	0.29777	2.67565	6
0000081_96.tif	predator	12.325	3.474	7.93611	0.29777	2.36314	6
0000081_96.tif	predator	13.637	3.925	7.21169	0.29777	2.14743	6
0000081_96.tif	predator	16.797	1.467	9.84251	0.29777	2.93081	6
0000081_96.tif	predator	17.595	1.203	10.3009	0.29777	3.06731	6
0000081_96.tif	predator	17.693	1.148	10.3821	0.29777	3.09148	6
0000081_96.tif	predator	18.231	2.467	9.3244	0.29777	2.77653	6
0000081_96.tif	predator	18.842	3.592	8.58088	0.29777	2.55513	6
0000081_96.tif	predator	19.925	2.418	10.142	0.29777	3.01997	6
0000081_96.tif	predator	21.53	4.384	9.60655	0.29777	2.86054	6
0000081_96.tif	predator	19.682	5.731	7.3489	0.29777	2.18828	6
0000081_96.tif	predator	18.71	7.036	5.73615	0.29777	1.70805	6
0000081_96.tif	predator	19.141	7.28	5.89051	0.29777	1.75402	6
0000081_96.tif	predator	20.62	7.189	7.1363	0.29777	2.12498	6
0000081_96.tif	predator	21.71	6.821	8.25611	0.29777	2.45842	6
0000081_96.tif	predator	23.384	5.863	10.1845	0.29777	3.03265	6
0000081_96.tif	predator	23.536	5.773	10.3612	0.29777	3.08525	6
0000081_96.tif	predator	18.974	10.168	4.43625	0.29777	1.32098	6
0000081_96.tif	predator	19.682	9.141	5.40704	0.29777	1.61005	6
0000081_96.tif	predator	20.62	10.585	6.00944	0.29777	1.78943	6
0000081_96.tif	predator	21.773	9.474	7.31869	0.29777	2.17929	6
0000081_96.tif	predator	20.05	12.825	5.69767	0.29777	1.6966	6
0000081_96.tif	predator	22.106	11.804	7.51214	0.29777	2.23689	6
0000085_40.tif	predator	6.26	13.521	7.94196	0.29777	2.36488	3
0000085_40.tif	predator	6.339	13.557	7.87571	0.29777	2.34515	3
0000085_40.tif	predator	9.661	9.786	4.54296	0.29777	1.35276	3
0000085_40.tif	predator	10.37	9.714	3.91804	0.29777	1.16667	3
0000085_40.tif	predator	10.995	10.047	3.21082	0.29777	0.956087	3
0000085_40.tif	predator	11.307	11.339	2.60452	0.29777	0.775548	3
0000085_40.tif	predator	11.724	14.422	3.73764	0.29777	1.11296	3
0000085_40.tif	predator	11.745	14.536	3.81871	0.29777	1.1371	3
0000085_40.tif	predator	12.995	14.839	3.5676	0.29777	1.06232	3
0000085_40.tif	predator	13.047	14.703	3.42284	0.29777	1.01922	3
0000085_40.tif	predator	13.453	14.724	3.36432	0.29777	1.00179	3
0000085_40.tif	predator	13.609	14.839	3.4612	0.29777	1.03064	3
0000085_40.tif	predator	13.089	13.099	1.89551	0.29777	0.564425	3
0000085_40.tif	predator	12.901	13.036	1.93032	0.29777	0.574791	3
0000085_40.tif	predator	15.828	16.234	5.2086	0.29777	1.55097	3
0000085_40.tif	predator	15.953	16.057	5.09326	0.29777	1.51662	3
0000085_40.tif	predator	17.089	17.495	6.88175	0.29777	2.04918	3
0000085_40.tif	predator	16.964	17.411	6.7499	0.29777	2.00992	3
0000085_40.tif	predator	16.672	19.036	8.12829	0.29777	2.42036	3
0000085_40.tif	predator	16.38	20.984	9.90564	0.29777	2.9496	3
0000085_40.tif	predator	17.464	20.974	10.2205	0.29777	3.04334	3
0000085_40.tif	predator	17.63	17.766	7.38049	0.29777	2.19769	3
0000085_40.tif	predator	17.682	18.224	7.80451	0.29777	2.32395	3
0000085_40.tif	predator	17.797	18.161	7.80602	0.29777	2.3244	3
0000085_40.tif	predator	22.068	15.974	9.35631	0.29777	2.78603	3
0000085_40.tif	predator	22.766	15.224	9.64899	0.29777	2.87318	3
0000085_40.tif	predator	22.422	14.13	8.94087	0.29777	2.66232	3
0000085_40.tif	predator	22.599	12.776	8.7977	0.29777	2.61969	3
0000085_40.tif	predator	13.047	8.703	2.82344	0.29777	0.840737	3
0000085_40.tif	predator	15.932	9.901	2.51088	0.29777	0.747666	3
0000085_40.tif	predator	16.516	9.401	3.27813	0.29777	0.976128	3
0000085_40.tif	predator	16.62	9.411	3.35546	0.29777	0.999154	3
0000085_40.tif	predator	18.172	10.286	4.40195	0.29777	1.31077	3
0000085_40.tif	predator	20.953	5.724	9.03906	0.29777	2.69156	3
0000085_40.tif	predator	22.099	6.964	9.30815	0.29777	2.77169	3
0000085_40.tif	predator	22.193	7.016	9.36654	0.29777	2.78908	3
0000085_40.tif	predator	22.766	8.359	9.3597	0.29777	2.78704	3
0000085_40.tif	predator	22.161	9.401	8.48661	0.29777	2.52706	3
0000085_40.tif	predator	22.182	9.557	8.47189	0.29777	2.52268	3
0000085_40.tif	predator	19.099	3.901	9.11128	0.29777	2.71307	3
0000088_56.tif	control	10.635	4.792	8.16158	0.29777	2.43027	4
0000088_56.tif	control	10.957	5.526	7.37182	0.29777	2.19511	4
0000088_56.tif	control	10.019	7.686	6.42174	0.29777	1.9122	4
0000088_56.tif	control	10.089	7.804	6.29417	0.29777	1.87422	4
0000088_56.tif	control	7.839	5.825	9.2861	0.29777	2.76512	4
0000088_56.tif	control	5.498	10.064	9.71289	0.29777	2.89221	4
0000088_56.tif	control	6.158	9.446	9.18952	0.29777	2.73636	4
0000088_56.tif	control	6.991	13.203	8.24252	0.29777	2.45437	4
0000088_56.tif	control	7.095	13.085	8.11854	0.29777	2.41746	4
0000088_56.tif	control	10.602	13.016	4.68898	0.29777	1.39624	4
0000088_56.tif	control	10.658	12.925	4.6092	0.29777	1.37248	4
0000088_56.tif	control	10.887	10.175	4.44275	0.29777	1.32292	4
0000088_56.tif	control	10.936	10.064	4.4346	0.29777	1.32049	4
0000088_56.tif	control	7.304	16.224	9.03171	0.29777	2.68937	4
0000088_56.tif	control	15.651	19.72	8.10493	0.29777	2.4134	4
0000088_56.tif	control	15.568	19.595	7.97476	0.29777	2.37464	4
0000088_56.tif	control	11.79	16.026	5.4886	0.29777	1.63434	4
0000088_56.tif	control	11.783	16.089	5.54329	0.29777	1.65063	4
0000088_56.tif	control	12.089	16.255	5.50531	0.29777	1.63932	4
0000088_56.tif	control	15.269	15.106	3.47598	0.29777	1.03504	4
0000088_56.tif	control	15.7	14.967	3.38864	0.29777	1.00904	4
0000088_56.tif	control	11.387	12.759	3.86313	0.29777	1.15032	4
0000088_56.tif	control	11.29	12.668	3.93115	0.29777	1.17058	4
0000088_56.tif	control	12.422	12.939	2.96333	0.29777	0.882391	4
0000088_56.tif	control	11.255	10.925	3.89329	0.29777	1.1593	4
0000088_56.tif	control	11.373	10.835	3.79527	0.29777	1.13012	4
0000088_56.tif	control	12.366	10.057	3.142	0.29777	0.935594	4
0000088_56.tif	control	12.422	10.161	3.04197	0.29777	0.905808	4
0000088_56.tif	control	11.804	7.87	4.9927	0.29777	1.48668	4
0000088_56.tif	control	11.936	7.585	5.12895	0.29777	1.52725	4
0000088_56.tif	control	12.137	7.536	5.04784	0.29777	1.5031	4
0000088_56.tif	control	11.248	6.109	6.72636	0.29777	2.00291	4
0000088_56.tif	control	12.38	7.102	5.27772	0.29777	1.57155	4
0000088_56.tif	control	11.533	5.616	6.98791	0.29777	2.08079	4
0000088_56.tif	control	11.63	5.582	6.96865	0.29777	2.07505	4
0000088_56.tif	control	11.408	5.498	7.15321	0.29777	2.13001	4
0000088_56.tif	control	11.318	5.352	7.32471	0.29777	2.18108	4
0000088_56.tif	control	11.345	4.068	8.43991	0.29777	2.51315	4
0000088_56.tif	control	12.068	3.797	8.39788	0.29777	2.50064	4
0000088_56.tif	control	15.929	3.97	7.71155	0.29777	2.29627	4
0000088_56.tif	control	16.255	3.408	8.31006	0.29777	2.47449	4
0000088_56.tif	control	16.776	5.318	6.53993	0.29777	1.9474	4
0000088_56.tif	control	18.068	5.005	7.27098	0.29777	2.16508	4
0000088_56.tif	control	18.373	4.658	7.71379	0.29777	2.29694	4
0000088_56.tif	control	20.019	5.408	7.94604	0.29777	2.36609	4
0000088_56.tif	control	19.63	5.825	7.37776	0.29777	2.19687	4
0000088_56.tif	control	19.089	6.637	6.40531	0.29777	1.90731	4
0000088_56.tif	control	19.123	6.825	6.28154	0.29777	1.87045	4
0000088_56.tif	control	20.311	6.227	7.52186	0.29777	2.23979	4
0000088_56.tif	control	20.2	6.283	7.40457	0.29777	2.20486	4
0000088_56.tif	control	20.429	6.172	7.64356	0.29777	2.27602	4
0000088_56.tif	control	20.512	6.283	7.62351	0.29777	2.27005	4
0000088_56.tif	control	20.519	6.408	7.54133	0.29777	2.24558	4
0000088_56.tif	control	20.54	5.832	7.96578	0.29777	2.37197	4
0000088_56.tif	control	20.318	10.016	5.47963	0.29777	1.63167	4
0000088_56.tif	control	18.13	11.05	3.10265	0.29777	0.923876	4
0000088_56.tif	control	18.214	11.432	3.13757	0.29777	0.934275	4
0000088_56.tif	control	16.859	12.891	2.17525	0.29777	0.647724	4
0000088_56.tif	control	21.457	13.005	6.51957	0.29777	1.94133	4
0000088_56.tif	control	20.637	9.7	5.88142	0.29777	1.75131	4
0000088_56.tif	control	21.776	4.512	9.77412	0.29777	2.91044	4
0000088_56.tif	control	21.762	4.401	9.8458	0.29777	2.93178	4
0000089_41.tif	predator	5.615	10.594	8.97481	0.29777	2.67243	3
0000089_41.tif	predator	7.443	9.616	7.33359	0.29777	2.18372	3
0000089_41.tif	predator	6.082	8.672	8.9037	0.29777	2.65126	3
0000089_41.tif	predator	6.429	7.762	8.90742	0.29777	2.65236	3
0000089_41.tif	predator	8.29	9.186	6.64756	0.29777	1.97944	3
0000089_41.tif	predator	10.7	8.797	4.65857	0.29777	1.38718	3
0000089_41.tif	predator	10.477	6.422	6.44637	0.29777	1.91953	3
0000089_41.tif	predator	9.894	11.276	4.66013	0.29777	1.38765	3
0000089_41.tif	predator	10.061	11.137	4.49972	0.29777	1.33988	3
0000089_41.tif	predator	10.144	11.207	4.413	0.29777	1.31406	3
0000089_41.tif	predator	9.998	11.387	4.5541	0.29777	1.35607	3
0000089_41.tif	predator	9.936	11.505	4.61684	0.29777	1.37476	3
0000089_41.tif	predator	9.436	12.859	5.31534	0.29777	1.58275	3
0000089_41.tif	predator	7.998	14.422	7.21006	0.29777	2.14694	3
0000089_41.tif	predator	8.339	16.182	7.82985	0.29777	2.3315	3
0000089_41.tif	predator	8.394	16.342	7.88521	0.29777	2.34798	3
0000089_41.tif	predator	17.061	20.894	9.8035	0.29777	2.91919	3
0000089_41.tif	predator	12.026	12.769	2.86506	0.29777	0.853129	3
0000089_41.tif	predator	11.991	12.429	2.7537	0.29777	0.819969	3
0000089_41.tif	predator	11.991	12.332	2.71955	0.29777	0.8098	3
0000089_41.tif	predator	12.387	11.54	2.16849	0.29777	0.645712	3
0000089_41.tif	predator	11.908	10.241	2.89374	0.29777	0.861668	3
0000089_41.tif	predator	17.297	11.158	2.75719	0.29777	0.821009	3
0000089_41.tif	predator	11.748	9.075	3.65341	0.29777	1.08787	3
0000089_41.tif	predator	11.707	9.102	3.66787	0.29777	1.09218	3
0000089_41.tif	predator	17.359	9.637	3.3238	0.29777	0.989728	3
0000089_41.tif	predator	15.88	5.731	5.83902	0.29777	1.73869	3
0000089_41.tif	predator	15.991	5.731	5.86526	0.29777	1.7465	3
0000089_41.tif	predator	16.345	1.523	10.0552	0.29777	2.99412	3
0000089_41.tif	predator	16.352	1.411	10.1666	0.29777	3.02731	3
0000089_41.tif	predator	22.533	5.481	9.94648	0.29777	2.96176	3
0000089_41.tif	predator	23.276	6.328	10.0998	0.29777	3.00742	3
0000089_41.tif	predator	21.498	6.745	8.37105	0.29777	2.49265	3
0000089_41.tif	predator	21.318	8.398	7.40899	0.29777	2.20617	3
0000089_41.tif	predator	21.589	9.432	7.31161	0.29777	2.17718	3
0000089_41.tif	predator	18.2	12.602	3.83564	0.29777	1.14214	3
0000089_41.tif	predator	18.186	12.714	3.85852	0.29777	1.14895	3
0000091_55.tif	control	10.396	10.906	4.65264	0.29777	1.38542	4
0000091_55.tif	control	10.238	11.068	4.784	0.29777	1.42453	4
0000091_55.tif	control	12.085	12.686	3.05479	0.29777	0.909624	4
0000091_55.tif	control	12.134	12.804	3.04881	0.29777	0.907844	4
0000091_55.tif	control	12.321	12.63	2.81337	0.29777	0.837737	4
0000091_55.tif	control	12.467	12.484	2.62913	0.29777	0.782876	4
0000091_55.tif	control	12.405	12.29	2.63898	0.29777	0.785808	4
0000091_55.tif	control	12.564	12.45	2.52642	0.29777	0.752292	4
0000091_55.tif	control	12.509	12.116	2.50347	0.29777	0.745458	4
0000091_55.tif	control	12.877	12.38	2.2068	0.29777	0.65712	4
0000091_55.tif	control	13.141	12.609	2.04696	0.29777	0.609523	4
0000091_55.tif	control	13.592	12.089	1.43838	0.29777	0.428306	4
0000091_55.tif	control	13.405	11.977	1.59682	0.29777	0.475485	4
0000091_55.tif	control	14.307	9.373	2.42978	0.29777	0.723514	4
0000091_55.tif	control	8.946	13.991	6.45052	0.29777	1.92077	4
0000091_55.tif	control	8.957	16.207	7.51701	0.29777	2.23834	4
0000091_55.tif	control	8.686	15.13	7.16323	0.29777	2.133	4
0000091_55.tif	control	10.707	14.637	5.17967	0.29777	1.54235	4
0000091_55.tif	control	11.825	17.207	6.3393	0.29777	1.88765	4
0000091_55.tif	control	14.311	15.005	3.36399	0.29777	1.0017	4
0000091_55.tif	control	14.276	15.172	3.53462	0.29777	1.0525	4
0000091_55.tif	control	14.672	14.054	2.366	0.29777	0.704524	4
0000091_55.tif	control	14.484	15.22	3.54671	0.29777	1.0561	4
0000091_55.tif	control	14.609	15.359	3.6697	0.29777	1.09273	4
0000091_55.tif	control	13.672	16.429	4.89858	0.29777	1.45865	4
0000091_55.tif	control	13.859	16.873	5.28504	0.29777	1.57373	4
0000091_55.tif	control	13.964	17.082	5.46901	0.29777	1.62851	4
0000091_55.tif	control	14.102	17.102	5.46483	0.29777	1.62726	4
0000091_55.tif	control	14.63	17.165	5.46815	0.29777	1.62825	4
0000091_55.tif	control	17.741	15.144	4.40849	0.29777	1.31271	4
0000091_55.tif	control	15.766	1.776	9.96313	0.29777	2.96672	4
0000091_55.tif	control	15.859	1.995	9.75278	0.29777	2.90409	4
0000091_55.tif	control	13.734	4.526	7.28911	0.29777	2.17048	4
0000091_55.tif	control	13.807	5.443	6.37368	0.29777	1.89789	4
0000091_55.tif	control	13.807	5.589	6.23023	0.29777	1.85518	4
0000091_55.tif	control	13.849	6.057	5.76287	0.29777	1.71601	4
0000091_55.tif	control	13.88	6.026	5.78731	0.29777	1.72329	4
0000091_55.tif	control	14.151	6.193	5.57681	0.29777	1.66061	4
0000091_55.tif	control	14.224	7.151	4.61912	0.29777	1.37544	4
0000091_55.tif	control	13.849	8.276	3.61324	0.29777	1.07592	4
0000091_55.tif	control	13.974	8.13	3.71646	0.29777	1.10665	4
0000091_55.tif	control	15.151	7.38	4.33142	0.29777	1.28977	4
0000091_55.tif	control	15.839	7.755	4.04547	0.29777	1.20462	4
0000091_55.tif	control	16.12	8.089	3.79461	0.29777	1.12992	4
0000091_55.tif	control	16.182	8.276	3.63673	0.29777	1.08291	4
0000091_55.tif	control	16.047	8.734	3.15995	0.29777	0.940939	4
0000091_55.tif	control	15.693	9.484	2.3358	0.29777	0.695532	4
0000091_55.tif	control	15.547	10.026	1.77532	0.29777	0.528636	4
0000091_55.tif	control	17.672	6.047	6.26891	0.29777	1.86669	4
0000091_55.tif	control	19.828	8.839	5.63418	0.29777	1.67769	4
0000091_55.tif	control	19.755	9.411	5.29966	0.29777	1.57808	4
0000091_55.tif	control	19.953	9.401	5.48297	0.29777	1.63266	4
0000091_55.tif	control	20.172	9.932	5.4883	0.29777	1.63425	4
0000091_55.tif	control	19.693	10.391	4.89452	0.29777	1.45744	4
0000091_55.tif	control	19.547	10.547	4.71323	0.29777	1.40346	4
0000091_55.tif	control	19.068	14.078	4.72618	0.29777	1.40732	4
0000091_55.tif	control	19.057	11.87	4.08122	0.29777	1.21526	4
0000091_55.tif	control	19.172	11.932	4.19898	0.29777	1.25033	4
0000091_55.tif	control	19.484	14.401	5.24855	0.29777	1.56286	4
0000091_55.tif	control	19.387	14.498	5.21676	0.29777	1.55339	4
0000091_55.tif	control	18.078	15.214	4.6793	0.29777	1.39335	4
0000091_55.tif	control	18.818	16.207	5.9143	0.29777	1.7611	4
0000091_55.tif	control	18.724	16.161	5.81844	0.29777	1.73256	4
0000091_55.tif	control	19.797	17.297	7.37903	0.29777	2.19725	4
0000091_55.tif	control	15.276	18.724	7.02228	0.29777	2.09103	4
0000091_55.tif	control	13.248	20.446	8.90781	0.29777	2.65248	4
0000091_55.tif	control	13.318	20.516	8.96325	0.29777	2.66899	4
0000091_55.tif	control	21.307	12.832	6.42705	0.29777	1.91378	4
0000091_55.tif	control	21.446	12.818	6.56157	0.29777	1.95384	4
0000091_55.tif	control	21.606	12.693	6.6998	0.29777	1.995	4
0000091_55.tif	control	20.849	13.804	6.23299	0.29777	1.856	4
0000091_55.tif	control	21.495	14.63	7.14117	0.29777	2.12643	4
0000091_55.tif	control	24.724	10.193	9.86206	0.29777	2.93663	4
0000091_55.tif	control	23.092	8.88	8.59176	0.29777	2.55837	4
0000091_55.tif	control	23.509	9.45	8.8238	0.29777	2.62746	4
0000091_55.tif	control	23.592	9.394	8.91843	0.29777	2.65564	4
0000091_55.tif	control	23.724	9.595	8.99665	0.29777	2.67893	4
0000091_55.tif	control	24.807	9.47	10.0796	0.29777	3.0014	4
0000091_55.tif	control	21.995	6.495	8.74069	0.29777	2.60271	4
0000092_36.tif	predator	7.594	7.865	6.98208	0.29777	2.07905	1
0000092_36.tif	predator	7.908	9.231	6.22603	0.29777	1.85392	1
0000092_36.tif	predator	9.786	12.818	4.62477	0.29777	1.37712	1
0000092_36.tif	predator	10.536	8.595	4.04379	0.29777	1.20412	1
0000092_36.tif	predator	11.231	8.908	3.2918	0.29777	0.980201	1
0000092_36.tif	predator	14.432	9.609	1.27186	0.29777	0.378721	1
0000092_36.tif	predator	14.3	9.554	1.27929	0.29777	0.380933	1
0000092_36.tif	predator	14.328	5.755	5.04111	0.29777	1.50109	1
0000092_36.tif	predator	16.47	8.099	3.68838	0.29777	1.09829	1
0000092_36.tif	predator	16.547	8.127	3.72164	0.29777	1.10819	1
0000092_36.tif	predator	19.148	18.946	9.68562	0.29777	2.88409	1
0000092_36.tif	predator	19.3	11.519	5.41255	0.29777	1.61169	1
0000092_36.tif	predator	18.418	10.519	4.48765	0.29777	1.33629	1
0000092_36.tif	predator	18.335	10.415	4.41221	0.29777	1.31382	1
0000092_36.tif	predator	23.53	11.026	9.59513	0.29777	2.85714	1
0000092_36.tif	predator	23.286	8.703	9.57618	0.29777	2.8515	1
0000093_40.tif	control	16.675	13.026	2.29667	0.29777	0.683879	2
0000093_40.tif	control	8.227	6.863	8.16165	0.29777	2.43029	2
0000093_40.tif	control	10.429	7.655	5.94526	0.29777	1.77032	2
0000093_40.tif	control	9.839	8.446	5.93925	0.29777	1.76853	2
0000093_40.tif	control	9.804	8.592	5.89252	0.29777	1.75462	2
0000093_40.tif	control	9.498	13.398	5.64815	0.29777	1.68185	2
0000093_40.tif	control	9.359	13.53	5.82221	0.29777	1.73368	2
0000093_40.tif	control	9.821	20.207	9.9558	0.29777	2.96454	2
0000093_40.tif	control	11.453	20.429	9.44454	0.29777	2.8123	2
0000093_40.tif	control	11.835	20.922	9.7812	0.29777	2.91255	2
0000093_40.tif	control	14.057	20.47	8.88626	0.29777	2.64606	2
0000093_40.tif	control	13.932	20.22	8.64982	0.29777	2.57566	2
0000093_40.tif	control	14.043	20.123	8.54206	0.29777	2.54357	2
0000093_40.tif	control	10.766	18.582	8.07602	0.29777	2.4048	2
0000093_40.tif	control	11.675	17.089	6.32833	0.29777	1.88439	2
0000093_40.tif	control	13.113	13.533	2.59	0.29777	0.771223	2
0000093_40.tif	control	13.696	12.335	1.36521	0.29777	0.406518	2
0000093_40.tif	control	13.578	12.203	1.40743	0.29777	0.419089	2
0000093_40.tif	control	13.717	10.891	1.35485	0.29777	0.403432	2
0000093_40.tif	control	11.071	9.863	4.17564	0.29777	1.24338	2
0000093_40.tif	control	10.55	6.894	6.39551	0.29777	1.90439	2
0000093_40.tif	control	18.036	6.679	5.87425	0.29777	1.74918	2
0000093_40.tif	control	17.96	6.783	5.74567	0.29777	1.71089	2
0000093_40.tif	control	15.648	11.019	0.991828	0.29777	0.295337	2
0000093_40.tif	control	16.259	11.783	1.40946	0.29777	0.419694	2
0000093_40.tif	control	16.363	11.991	1.54908	0.29777	0.46127	2
0000093_40.tif	control	15.856	18.825	7.27365	0.29777	2.16588	2
0000093_40.tif	control	15.481	19.144	7.54967	0.29777	2.24806	2
0000093_40.tif	control	21.043	16.981	8.18426	0.29777	2.43703	2
0000093_40.tif	control	20.946	16.87	8.03829	0.29777	2.39356	2
0000093_40.tif	control	22.523	15.234	8.47336	0.29777	2.52311	2
0000093_40.tif	control	18.62	8.214	5.07405	0.29777	1.5109	2
0000093_40.tif	control	18.63	8.109	5.15243	0.29777	1.53424	2
0000093_40.tif	control	18.698	7.625	5.54057	0.29777	1.64982	2
0000093_40.tif	control	19.219	7.714	5.85375	0.29777	1.74307	2
0000093_40.tif	control	21.005	8.224	7.02183	0.29777	2.09089	2
0000093_40.tif	control	24.498	8.724	10.0646	0.29777	2.99695	2
0000093_40.tif	control	24.745	12.203	9.90318	0.29777	2.94887	2
0000093_40.tif	control	24.651	12.198	9.80904	0.29777	2.92084	2
0000093_60.tif	predator	4.865	8.917	9.92567	0.29777	2.95557	4
0000093_60.tif	predator	4.797	8.724	10.0369	0.29777	2.98867	4
0000093_60.tif	predator	10.023	3.658	8.74713	0.29777	2.60463	4
0000093_60.tif	predator	6.571	6.019	9.47516	0.29777	2.82142	4
0000093_60.tif	predator	10.516	6.165	6.40473	0.29777	1.90714	4
0000093_60.tif	predator	10.3	6.984	5.94202	0.29777	1.76935	4
0000093_60.tif	predator	9.356	8.543	5.79949	0.29777	1.72691	4
0000093_60.tif	predator	11.898	10.033	2.86513	0.29777	0.85315	4
0000093_60.tif	predator	9.599	10.964	4.94054	0.29777	1.47114	4
0000093_60.tif	predator	9.96	11.227	4.57663	0.29777	1.36278	4
0000093_60.tif	predator	9.932	11.345	4.60809	0.29777	1.37215	4
0000093_60.tif	predator	13.415	18.748	7.67926	0.29777	2.28665	4
0000093_60.tif	predator	15.214	15.63	4.53002	0.29777	1.34891	4
0000093_60.tif	predator	12.609	14.457	3.82661	0.29777	1.13945	4
0000093_60.tif	predator	15.477	12.495	1.64068	0.29777	0.488544	4
0000093_60.tif	predator	15.776	11.55	1.30261	0.29777	0.387879	4
0000093_60.tif	predator	12.352	3.793	7.67529	0.29777	2.28547	4
0000093_60.tif	predator	13.491	3.099	8.11953	0.29777	2.41775	4
0000093_60.tif	predator	13.637	3.717	7.48816	0.29777	2.22975	4
0000093_60.tif	predator	13.998	4.523	6.6498	0.29777	1.98011	4
0000093_60.tif	predator	14.276	4.759	6.39729	0.29777	1.90492	4
0000093_60.tif	predator	21.873	5.637	9.178	0.29777	2.73293	4
0000093_60.tif	predator	17.97	7.304	5.15672	0.29777	1.53552	4
0000093_60.tif	predator	19.609	7.95	5.99848	0.29777	1.78617	4
0000093_60.tif	predator	19.727	8.679	5.74954	0.29777	1.71204	4
[truncated: 3,280 more rows]
