# Supplementary material for: Dopamine signaling regulates predator-driven changes in Caenorhabditis elegans’ egg laying behavior
Source: eLife. 2023 Jul 11;12:e83957. doi: 10.7554/eLife.83957 (PMC10335835; doi:10.7554/eLife.83957)
Supplement: Figure 4—source data 2. — For each test arena, data tabulate the arena, predator exposure condition, lawn type, <x,y> coordinates in pixels, lawn radius in pixels, the egg distance from arena center in pixels, the egg distance from lawn edge in pixels, position as 1 (off) or 0 (on) lawn, the conversion factor for pixel data in mm-per-pixel, the calculated distance from center in mm, the calculated distance from the lawn edge in mm, time in hr. [file elife-83957-fig4-data2.xlsx]

## Sheet: Figure4D-G
Arena	Condition	Lawn	X	Y	LawnRadius	DistCenterPx	DistEdgePx	off	PxScale	DistCenterMm	DistEdgeMm	t
0000000_20.tif	predator	norm	10.688	9.292	4.98971	4.48405	-0.505667	0		1.33521	-0.150573	1
0000000_20.tif	predator	norm	11.599	8.38	4.98971	4.43908	-0.550629	0		1.32183	-0.163961	1
0000000_20.tif	predator	norm	11.918	8.988	4.98971	3.76744	-1.22228	0		1.12183	-0.363957	1
0000000_20.tif	predator	norm	12.668	8.373	4.98971	3.86803	-1.12168	0		1.15178	-0.334002	1
0000000_20.tif	predator	norm	16.359	11.13	4.98971	2.10857	-2.88115	0		0.627868	-0.857919	1
0000000_20.tif	predator	norm	15.811	10.811	4.98971	1.76895	-3.22076	0		0.52674	-0.959047	1
0000000_20.tif	predator	norm	15.818	8.352	4.98971	3.7784	-1.21131	0		1.12509	-0.360693	1
0000000_20.tif	predator	norm	17.547	3.693	4.98971	8.74645	3.75674	1		2.60443	1.11864	1
0000000_20.tif	predator	norm	17.516	3.536	4.98971	8.88193	3.89222	1		2.64477	1.15899	1
0000001_62.tif	control	norm	8.5	13.771	5.125	5.10569	-0.0193163	0		1.52032	-0.0057518	4
0000001_62.tif	control	norm	8.467	13.623	5.125	5.05054	-0.0744662	0		1.5039	-0.0221738	4
0000001_62.tif	control	norm	7.967	12.269	5.125	4.93493	-0.190069	0		1.46948	-0.0565968	4
0000001_62.tif	control	norm	8.064	12.276	5.125	4.84406	-0.280947	0		1.44241	-0.0836577	4
0000001_62.tif	control	norm	8.002	11.776	5.125	4.78355	-0.341455	0		1.4244	-0.101675	4
0000001_62.tif	control	norm	8.37	11.665	5.125	4.40132	-0.723687	0		1.31058	-0.215492	4
0000001_62.tif	control	norm	8.613	11.887	5.125	4.2109	-0.9141	0		1.25388	-0.272191	4
0000001_62.tif	control	norm	9.377	14.234	5.125	4.73067	-0.394337	0		1.40865	-0.117422	4
0000001_62.tif	control	norm	9.578	14.45	5.125	4.75254	-0.372464	0		1.41516	-0.110909	4
0000001_62.tif	control	norm	9.738	14.665	5.125	4.8168	-0.308199	0		1.4343	-0.0917725	4
0000001_62.tif	control	norm	9.939	14.797	5.125	4.80341	-0.321598	0		1.43031	-0.0957622	4
0000001_62.tif	control	norm	8.12	11.099	5.125	4.58398	-0.541027	0		1.36497	-0.161102	4
0000001_62.tif	control	norm	8.193	11.099	5.125	4.51107	-0.61393	0		1.34326	-0.18281	4
0000001_62.tif	control	norm	8.328	10.885	5.125	4.37005	-0.754958	0		1.30127	-0.224804	4
0000001_62.tif	control	norm	8.161	10.5	5.125	4.55166	-0.573345	0		1.35535	-0.170725	4
0000001_62.tif	control	norm	8.698	10.802	5.125	4.0005	-1.12451	0		1.19123	-0.334845	4
0000001_62.tif	control	norm	8.99	10.932	5.125	3.70861	-1.4164	0		1.10431	-0.421761	4
0000001_62.tif	control	norm	9.365	10.292	5.125	3.3819	-1.74311	0		1.00703	-0.519045	4
0000001_62.tif	control	norm	9.911	10.891	5.125	2.78712	-2.33788	0		0.829921	-0.696151	4
0000001_62.tif	control	norm	9.901	10.943	5.125	2.79809	-2.32692	0		0.833186	-0.692886	4
0000001_62.tif	control	norm	10.036	12.068	5.125	2.92121	-2.2038	0		0.869848	-0.656224	4
0000001_62.tif	control	norm	10.568	11.938	5.125	2.385	-2.74	0		0.710182	-0.815891	4
0000001_62.tif	control	norm	10.818	12.052	5.125	2.22337	-2.90163	0		0.662053	-0.86402	4
0000001_62.tif	control	norm	10.87	12.094	5.125	2.20273	-2.92227	0		0.655907	-0.870165	4
0000001_62.tif	control	norm	10.875	11.938	5.125	2.11534	-3.00966	0		0.629884	-0.896188	4
0000001_62.tif	control	norm	11	12.073	5.125	2.08386	-3.04114	0		0.620511	-0.905562	4
0000001_62.tif	control	norm	10.167	10.667	5.125	2.53873	-2.58627	0		0.755959	-0.770114	4
0000001_62.tif	control	norm	10.417	10.411	5.125	2.32574	-2.79926	0		0.692536	-0.833536	4
0000001_62.tif	control	norm	10.354	10.286	5.125	2.41445	-2.71055	0		0.718951	-0.807121	4
0000001_62.tif	control	norm	10.714	10.599	5.125	2.00175	-3.12325	0		0.596062	-0.93001	4
0000001_62.tif	control	norm	10.776	10.385	5.125	1.98103	-3.14397	0		0.589892	-0.936181	4
0000001_62.tif	control	norm	9.625	9.438	5.125	3.38816	-1.73684	0		1.00889	-0.517179	4
0000001_62.tif	control	norm	9.615	9.349	5.125	3.43557	-1.68943	0		1.02301	-0.503062	4
0000001_62.tif	control	norm	10.521	8.948	5.125	2.90073	-2.22428	0		0.86375	-0.662323	4
0000001_62.tif	control	norm	10.724	8.099	5.125	3.39815	-1.72685	0		1.01187	-0.514205	4
0000001_62.tif	control	norm	11.286	7.828	5.125	3.3492	-1.77581	0		0.99729	-0.528782	4
0000001_62.tif	control	norm	11.26	7.917	5.125	3.28002	-1.84498	0		0.976692	-0.54938	4
0000001_62.tif	control	norm	12.266	8.354	5.125	2.54789	-2.57711	0		0.758685	-0.767387	4
0000001_62.tif	control	norm	12.188	8.729	5.125	2.19604	-2.92896	0		0.653915	-0.872157	4
0000001_62.tif	control	norm	11.724	8.911	5.125	2.1833	-2.9417	0		0.650121	-0.875951	4
0000001_62.tif	control	norm	11.349	9.094	5.125	2.22626	-2.89874	0		0.662914	-0.863158	4
0000001_62.tif	control	norm	11.068	9.557	5.125	2.08992	-3.03508	0		0.622315	-0.903757	4
0000001_62.tif	control	norm	11.271	9.776	5.125	1.79506	-3.32994	0		0.534516	-0.991556	4
0000001_62.tif	control	norm	11.245	9.839	5.125	1.77873	-3.34627	0		0.529653	-0.996419	4
0000001_62.tif	control	norm	11.724	10.068	5.125	1.25852	-3.86648	0		0.374751	-1.15132	4
0000001_62.tif	control	norm	11.562	9.75	5.125	1.59177	-3.53324	0		0.47398	-1.05209	4
0000001_62.tif	control	norm	11.589	11.536	5.125	1.2962	-3.82881	0		0.385968	-1.1401	4
0000001_62.tif	control	norm	12.557	10.885	5.125	0.142411	-4.98259	0		0.0424058	-1.48367	4
0000001_62.tif	control	norm	11.958	12.026	5.125	1.37678	-3.74822	0		0.409964	-1.11611	4
0000001_62.tif	control	norm	11.495	12.078	5.125	1.70838	-3.41662	0		0.508706	-1.01737	4
0000001_62.tif	control	norm	11.151	14.271	5.125	3.74086	-1.38414	0		1.11392	-0.412156	4
0000001_62.tif	control	norm	11.292	14.391	5.125	3.79599	-1.32902	0		1.13033	-0.395741	4
0000001_62.tif	control	norm	11.693	14.469	5.125	3.7415	-1.3835	0		1.11411	-0.411965	4
0000001_62.tif	control	norm	11.714	14.578	5.125	3.84117	-1.28383	0		1.14379	-0.382286	4
0000001_62.tif	control	norm	11.865	14.026	5.125	3.26892	-1.85609	0		0.973385	-0.552687	4
0000001_62.tif	control	norm	12.062	14.094	5.125	3.29104	-1.83396	0		0.979973	-0.5461	4
0000001_62.tif	control	norm	11.953	14.599	5.125	3.8076	-1.31741	0		1.13379	-0.392285	4
0000001_62.tif	control	norm	11.943	15.354	5.125	4.55205	-0.572955	0		1.35546	-0.170609	4
0000001_62.tif	control	norm	12.578	15.406	5.125	4.54259	-0.582418	0		1.35265	-0.173427	4
0000001_62.tif	control	norm	12.901	15.328	5.125	4.46761	-0.657389	0		1.33032	-0.195751	4
0000001_62.tif	control	norm	12.781	15.339	5.125	4.47477	-0.650233	0		1.33245	-0.19362	4
0000001_62.tif	control	norm	12.401	14.698	5.125	3.84449	-1.28051	0		1.14477	-0.381299	4
0000001_62.tif	control	norm	12.828	14.849	5.125	3.98612	-1.13888	0		1.18695	-0.339125	4
0000001_62.tif	control	norm	12.896	14.51	5.125	3.65037	-1.47463	0		1.08697	-0.4391	4
0000001_62.tif	control	norm	14.344	14.531	5.125	4.01857	-1.10644	0		1.19661	-0.329464	4
0000001_62.tif	control	norm	15.859	13.693	5.125	4.2414	-0.8836	0		1.26296	-0.263109	4
0000001_62.tif	control	norm	15.714	13.693	5.125	4.13447	-0.990534	0		1.23112	-0.294951	4
0000001_62.tif	control	norm	13.302	13.24	5.125	2.4506	-2.6744	0		0.729715	-0.796357	4
0000001_62.tif	control	norm	14.068	13.109	5.125	2.62915	-2.49585	0		0.782882	-0.74319	4
0000001_62.tif	control	norm	14.833	13.042	5.125	3.04919	-2.07581	0		0.907957	-0.618115	4
0000001_62.tif	control	norm	13.521	11.958	5.125	1.3682	-3.7568	0		0.40741	-1.11866	4
0000001_62.tif	control	norm	16.625	11.818	5.125	4.04098	-1.08402	0		1.20328	-0.322789	4
0000001_62.tif	control	norm	16.286	9.62	5.125	3.79786	-1.32714	0		1.13089	-0.395182	4
0000001_62.tif	control	norm	12.891	7.906	5.125	2.96529	-2.15972	0		0.882974	-0.643099	4
0000001_62.tif	control	norm	12.906	7.818	5.125	3.05409	-2.07091	0		0.909417	-0.616655	4
0000001_62.tif	control	norm	12.958	7.599	5.125	3.27633	-1.84867	0		0.975594	-0.550479	4
0000001_62.tif	control	norm	13.755	7.615	5.125	3.41756	-1.70744	0		1.01765	-0.508424	4
0000001_62.tif	control	norm	13.625	7.609	5.125	3.38539	-1.73961	0		1.00807	-0.518005	4
0000001_62.tif	control	norm	17.557	10	5.125	4.93539	-0.18961	0		1.46961	-0.0564602	4
0000001_62.tif	control	norm	17.255	10.276	5.125	4.59491	-0.530096	0		1.36823	-0.157847	4
0000001_97.tif	control	norm	9.323	8.036	5.38551	4.97845	-0.40706	0		1.48243	-0.12121	6
0000001_97.tif	control	norm	9.266	8.151	5.38551	4.94931	-0.436203	0		1.47376	-0.129888	6
0000001_97.tif	control	norm	9.88	8.698	5.38551	4.12828	-1.25723	0		1.22928	-0.374365	6
0000001_97.tif	control	norm	10.052	8.651	5.38551	4.02469	-1.36082	0		1.19843	-0.405213	6
0000001_97.tif	control	norm	10.5	8.224	5.38551	4.00591	-1.37961	0		1.19284	-0.410805	6
0000001_97.tif	control	norm	10.839	7.953	5.38551	4.01198	-1.37353	0		1.19465	-0.408996	6
0000001_97.tif	control	norm	10.302	9.469	5.38551	3.33786	-2.04766	0		0.993914	-0.609731	6
0000001_97.tif	control	norm	8.938	10.219	5.38551	4.31207	-1.07345	0		1.284	-0.31964	6
0000001_97.tif	control	norm	8.781	10.385	5.38551	4.42928	-0.956229	0		1.31891	-0.284736	6
0000001_97.tif	control	norm	8.453	10.99	5.38551	4.67923	-0.706285	0		1.39333	-0.21031	6
0000001_97.tif	control	norm	8.151	11.469	5.38551	4.97882	-0.406695	0		1.48254	-0.121102	6
0000001_97.tif	control	norm	8.484	11.651	5.38551	4.65829	-0.727222	0		1.3871	-0.216545	6
0000001_97.tif	control	norm	9.984	10.599	5.38551	3.20775	-2.17776	0		0.955173	-0.648472	6
0000001_97.tif	control	norm	10.042	10.672	5.38551	3.13671	-2.2488	0		0.934019	-0.669625	6
0000001_97.tif	control	norm	10.042	11.526	5.38551	3.09533	-2.29018	0		0.921696	-0.681948	6
0000001_97.tif	control	norm	8.589	12.568	5.38551	4.7236	-0.661911	0		1.40655	-0.197097	6
0000001_97.tif	control	norm	10.672	12.391	5.38551	2.70538	-2.68013	0		0.805582	-0.798063	6
0000001_97.tif	control	norm	10.953	12.484	5.38551	2.49807	-2.88745	0		0.743849	-0.859795	6
0000001_97.tif	control	norm	11.016	12.328	5.38551	2.36854	-3.01698	0		0.705279	-0.898365	6
0000001_97.tif	control	norm	8.917	13.339	5.38551	4.698	-0.687516	0		1.39892	-0.204722	6
0000001_97.tif	control	norm	10.135	13.349	5.38551	3.6532	-1.73231	0		1.08781	-0.51583	6
0000001_97.tif	control	norm	9.938	14.12	5.38551	4.28881	-1.09671	0		1.27708	-0.326566	6
0000001_97.tif	control	norm	10.646	13.99	5.38551	3.695	-1.69051	0		1.10026	-0.503384	6
0000001_97.tif	control	norm	11.786	16.557	5.38551	5.47331	0.0878004	1		1.62979	0.0261443	6
0000001_97.tif	control	norm	11.547	15.812	5.38551	4.82721	-0.558307	0		1.4374	-0.166247	6
0000001_97.tif	control	norm	11.115	15.135	5.38551	4.37417	-1.01135	0		1.3025	-0.301149	6
0000001_97.tif	control	norm	11.328	14.562	5.38551	3.7681	-1.61742	0		1.12203	-0.481618	6
0000001_97.tif	control	norm	11.505	14.438	5.38551	3.576	-1.80952	0		1.06482	-0.53882	6
0000001_97.tif	control	norm	11.589	14.385	5.38551	3.49106	-1.89445	0		1.03953	-0.564111	6
0000001_97.tif	control	norm	11.568	14.688	5.38551	3.77413	-1.61138	0		1.12382	-0.47982	6
0000001_97.tif	control	norm	11.823	14.667	5.38551	3.65665	-1.72886	0		1.08884	-0.514804	6
0000001_97.tif	control	norm	12.182	15.135	5.38551	3.99781	-1.38771	0		1.19043	-0.413217	6
0000001_97.tif	control	norm	12.021	14.385	5.38551	3.32371	-2.06181	0		0.989701	-0.613944	6
0000001_97.tif	control	norm	11.49	12.344	5.38551	1.96725	-3.41827	0		0.585787	-1.01786	6
0000001_97.tif	control	norm	11.547	11.984	5.38551	1.74036	-3.64516	0		0.518226	-1.08542	6
0000001_97.tif	control	norm	11.568	11.922	5.38551	1.69583	-3.68969	0		0.504967	-1.09868	6
0000001_97.tif	control	norm	11.406	10.552	5.38551	1.85531	-3.53021	0		0.552455	-1.05119	6
0000001_97.tif	control	norm	11.859	10.49	5.38551	1.4766	-3.90891	0		0.439688	-1.16396	6
0000001_97.tif	control	norm	11.823	10.411	5.38551	1.54891	-3.8366	0		0.461219	-1.14243	6
0000001_97.tif	control	norm	11.458	9.099	5.38551	2.72134	-2.66417	0		0.810333	-0.793311	6
0000001_97.tif	control	norm	11.688	8.391	5.38551	3.19982	-2.18569	0		0.95281	-0.650834	6
0000001_97.tif	control	norm	11.677	8.281	5.38551	3.30328	-2.08223	0		0.983618	-0.620027	6
0000001_97.tif	control	norm	11.672	7.802	5.38551	3.74165	-1.64387	0		1.11415	-0.489495	6
0000001_97.tif	control	norm	11.745	6.672	5.38551	4.78147	-0.604041	0		1.42378	-0.179865	6
0000001_97.tif	control	norm	12.161	6.214	5.38551	5.12744	-0.258079	0		1.5268	-0.0768481	6
0000001_97.tif	control	norm	12.271	6.182	5.38551	5.13945	-0.246065	0		1.53037	-0.0732706	6
0000001_97.tif	control	norm	13.01	5.917	5.38551	5.33424	-0.0512741	0		1.58838	-0.0152679	6
0000001_97.tif	control	norm	13.224	6.859	5.38551	4.39212	-0.993398	0		1.30784	-0.295804	6
0000001_97.tif	control	norm	13.859	6.995	5.38551	4.31784	-1.06767	0		1.28572	-0.31792	6
0000001_97.tif	control	norm	14.885	6.682	5.38551	4.89533	-0.490187	0		1.45768	-0.145963	6
0000001_97.tif	control	norm	14.818	6.589	5.38551	4.95895	-0.426565	0		1.47663	-0.127018	6
0000001_97.tif	control	norm	14.792	7.802	5.38551	3.82983	-1.55568	0		1.14041	-0.463236	6
0000001_97.tif	control	norm	13.74	7.786	5.38551	3.51817	-1.86734	0		1.04761	-0.556039	6
0000001_97.tif	control	norm	13.37	7.641	5.38551	3.61731	-1.76821	0		1.07713	-0.526519	6
0000001_97.tif	control	norm	12.802	9.234	5.38551	2.04171	-3.3438	0		0.60796	-0.995684	6
0000001_97.tif	control	norm	13.193	9.031	5.38551	2.22004	-3.16547	0		0.661062	-0.942583	6
0000001_97.tif	control	norm	13.26	9	5.38551	2.25405	-3.13147	0		0.671187	-0.932457	6
0000001_97.tif	control	norm	13.901	10.078	5.38551	1.40562	-3.9799	0		0.418551	-1.18509	6
0000001_97.tif	control	norm	13.901	10.177	5.38551	1.3242	-4.06131	0		0.394307	-1.20934	6
0000001_97.tif	control	norm	13.943	10.385	5.38551	1.19052	-4.19499	0		0.354503	-1.24914	6
0000001_97.tif	control	norm	13.464	10.635	5.38551	0.702244	-4.68327	0		0.209107	-1.39454	6
0000001_97.tif	control	norm	13.641	10.75	5.38551	0.71851	-4.667	0		0.213951	-1.38969	6
0000001_97.tif	control	norm	13.411	10.922	5.38551	0.435178	-4.95034	0		0.129583	-1.47406	6
0000001_97.tif	control	norm	13.656	11.396	5.38551	0.550706	-4.83481	0		0.163984	-1.43966	6
0000001_97.tif	control	norm	12.797	11.661	5.38551	0.525837	-4.85968	0		0.156579	-1.44707	6
0000001_97.tif	control	norm	12.839	11.833	5.38551	0.649373	-4.73614	0		0.193364	-1.41028	6
0000001_97.tif	control	norm	12.698	11.969	5.38551	0.836236	-4.54928	0		0.249006	-1.35464	6
0000001_97.tif	control	norm	12.599	11.979	5.38551	0.898953	-4.48656	0		0.267681	-1.33596	6
0000001_97.tif	control	norm	12.932	13	5.38551	1.76061	-3.6249	0		0.524257	-1.07939	6
0000001_97.tif	control	norm	13.427	12.964	5.38551	1.7404	-3.64511	0		0.51824	-1.0854	6
0000001_97.tif	control	norm	13.682	12.724	5.38551	1.57573	-3.80978	0		0.469205	-1.13444	6
0000001_97.tif	control	norm	14.438	12.771	5.38551	2.00933	-3.37618	0		0.598318	-1.00533	6
0000001_97.tif	control	norm	12.672	13.656	5.38551	2.44827	-2.93724	0		0.729023	-0.874622	6
0000001_97.tif	control	norm	12.359	14.125	5.38551	2.9753	-2.41022	0		0.885954	-0.717691	6
0000001_97.tif	control	norm	12.885	14.219	5.38551	2.97868	-2.40683	0		0.886963	-0.716682	6
0000001_97.tif	control	norm	13.005	14.266	5.38551	3.01839	-2.36713	0		0.898785	-0.70486	6
0000001_97.tif	control	norm	13.016	14.188	5.38551	2.94002	-2.44549	0		0.87545	-0.728194	6
0000001_97.tif	control	norm	13.536	13.49	5.38551	2.27739	-3.10812	0		0.678139	-0.925505	6
0000001_97.tif	control	norm	13.984	14.12	5.38551	2.99579	-2.38972	0		0.892058	-0.711587	6
0000001_97.tif	control	norm	12.719	15.141	5.38551	3.91212	-1.47339	0		1.16491	-0.438731	6
0000001_97.tif	control	norm	12.849	15.766	5.38551	4.52443	-0.861088	0		1.34724	-0.256406	6
0000001_97.tif	control	norm	13.292	15.438	5.38551	4.19133	-1.19419	0		1.24805	-0.355593	6
0000001_97.tif	control	norm	13.724	15.531	5.38551	4.3227	-1.06281	0		1.28717	-0.316473	6
0000001_97.tif	control	norm	14	15.49	5.38551	4.32934	-1.05617	0		1.28915	-0.314496	6
0000001_97.tif	control	norm	14.24	15.26	5.38551	4.16213	-1.22338	0		1.23936	-0.364287	6
0000001_97.tif	control	norm	14.182	15.146	5.38551	4.03684	-1.34868	0		1.20205	-0.401595	6
0000001_97.tif	control	norm	15.062	15.557	5.38551	4.72252	-0.662992	0		1.40623	-0.197419	6
0000001_97.tif	control	norm	15.089	14.859	5.38551	4.10879	-1.27672	0		1.22348	-0.380169	6
0000001_97.tif	control	norm	15.188	14.839	5.38551	4.13967	-1.24584	0		1.23267	-0.370974	6
0000001_97.tif	control	norm	14.651	14.411	5.38551	3.51007	-1.87544	0		1.04519	-0.558451	6
0000001_97.tif	control	norm	15.833	15.333	5.38551	4.8994	-0.486111	0		1.4589	-0.144749	6
0000001_97.tif	control	norm	15.75	14.927	5.38551	4.51785	-0.867666	0		1.34528	-0.258365	6
0000001_97.tif	control	norm	16.26	14.786	5.38551	4.72562	-0.65989	0		1.40715	-0.196495	6
0000001_97.tif	control	norm	16.214	14.036	5.38551	4.15977	-1.22574	0		1.23866	-0.364989	6
0000001_97.tif	control	norm	16.589	14.203	5.38551	4.55187	-0.833646	0		1.35541	-0.248235	6
0000001_97.tif	control	norm	16.698	14.203	5.38551	4.63536	-0.750157	0		1.38027	-0.223374	6
0000001_97.tif	control	norm	16.906	14.229	5.38551	4.81356	-0.57195	0		1.43334	-0.170309	6
0000001_97.tif	control	norm	16.755	14.474	5.38551	4.85501	-0.530509	0		1.44567	-0.15797	6
0000001_97.tif	control	norm	17.062	13.891	5.38551	4.74076	-0.644749	0		1.41166	-0.191987	6
0000001_97.tif	control	norm	15.302	12.828	5.38551	2.68876	-2.69676	0		0.800631	-0.803013	6
0000001_97.tif	control	norm	15.016	12.281	5.38551	2.1538	-3.23172	0		0.641336	-0.962308	6
0000001_97.tif	control	norm	15.24	11.63	5.38551	2.14887	-3.23665	0		0.639868	-0.963777	6
0000001_97.tif	control	norm	15.521	11.802	5.38551	2.45876	-2.92675	0		0.732146	-0.871498	6
0000001_97.tif	control	norm	15.75	11.578	5.38551	2.64541	-2.7401	0		0.787725	-0.81592	6
0000001_97.tif	control	norm	18.073	12	5.38551	5.00452	-0.380996	0		1.4902	-0.113449	6
0000001_97.tif	control	norm	17.854	11.729	5.38551	4.7532	-0.632317	0		1.41536	-0.188285	6
0000001_97.tif	control	norm	17.911	11.62	5.38551	4.80028	-0.585233	0		1.42938	-0.174265	6
0000001_97.tif	control	norm	17.672	11.453	5.38551	4.55153	-0.833985	0		1.35531	-0.248336	6
0000001_97.tif	control	norm	17.693	10.521	5.38551	4.6258	-0.75971	0		1.37743	-0.226219	6
0000001_97.tif	control	norm	17.521	9.901	5.38551	4.59833	-0.787186	0		1.36924	-0.2344	6
0000001_97.tif	control	norm	17.109	8.927	5.38551	4.61179	-0.773726	0		1.37325	-0.230392	6
0000001_97.tif	control	norm	17.135	8.812	5.38551	4.69297	-0.692546	0		1.39742	-0.20622	6
0000001_97.tif	control	norm	17.307	8.786	5.38551	4.85391	-0.531606	0		1.44535	-0.158296	6
0000001_97.tif	control	norm	15.328	8.49	5.38551	3.5314	-1.85411	0		1.05155	-0.552099	6
0000001_97.tif	control	norm	15.917	8.417	5.38551	3.97758	-1.40793	0		1.1844	-0.41924	6
0000001_97.tif	control	norm	16.49	7.948	5.38551	4.71449	-0.671023	0		1.40383	-0.19981	6
00000033_7.tif	control	norm	9.167	8.589	5.11994	4.11572	-1.00422	0		1.22554	-0.299026	1
00000033_7.tif	control	norm	10.021	9.401	5.11994	3.08775	-2.03219	0		0.91944	-0.605124	1
00000033_7.tif	control	norm	9.979	9.495	5.11994	3.11557	-2.00437	0		0.927722	-0.596842	1
00000033_7.tif	control	norm	10.078	10.5	5.11994	3.04941	-2.07053	0		0.908023	-0.616541	1
00000033_7.tif	control	norm	10.682	10.062	5.11994	2.39143	-2.72851	0		0.712095	-0.812469	1
00000033_7.tif	control	norm	11.24	10.161	5.11994	1.8464	-3.27354	0		0.549802	-0.974762	1
00000033_7.tif	control	norm	11.745	10.401	5.11994	1.41433	-3.70561	0		0.421145	-1.10342	1
00000033_7.tif	control	norm	11.135	9.422	5.11994	1.99146	-3.12847	0		0.592998	-0.931566	1
00000033_7.tif	control	norm	12.25	9.526	5.11994	0.899861	-4.22008	0		0.267951	-1.25661	1
00000033_7.tif	control	norm	12.521	9.427	5.11994	0.723799	-4.39614	0		0.215526	-1.30904	1
00000033_7.tif	control	norm	11.969	11.604	5.11994	2.02682	-3.09312	0		0.603527	-0.921037	1
00000033_7.tif	control	norm	11.078	12	5.11994	2.89239	-2.22755	0		0.861266	-0.663298	1
00000033_7.tif	control	norm	12.417	11.901	5.11994	2.10328	-3.01666	0		0.626295	-0.89827	1
00000033_7.tif	control	norm	12.344	12.406	5.11994	2.60753	-2.51241	0		0.776444	-0.748121	1
00000033_7.tif	control	norm	12.208	12.333	5.11994	2.57958	-2.54036	0		0.768121	-0.756443	1
00000033_7.tif	control	norm	11.917	8.13	5.11994	2.11217	-3.00777	0		0.628939	-0.895625	1
00000033_7.tif	control	norm	11.589	7.385	5.11994	2.91851	-2.20143	0		0.869045	-0.65552	1
00000033_7.tif	control	norm	11.724	7.365	5.11994	2.87013	-2.24981	0		0.854638	-0.669926	1
00000033_7.tif	control	norm	12.922	6.615	5.11994	3.28924	-1.8307	0		0.979438	-0.545127	1
00000033_7.tif	control	norm	12.177	7.089	5.11994	2.94978	-2.17015	0		0.878357	-0.646207	1
00000033_7.tif	control	norm	13.651	6.75	5.11994	3.20448	-1.91546	0		0.954198	-0.570366	1
00000033_7.tif	control	norm	13.703	6.781	5.11994	3.18396	-1.93598	0		0.948089	-0.576475	1
00000033_7.tif	control	norm	13.677	8.229	5.11994	1.77946	-3.34048	0		0.529869	-0.994695	1
00000033_7.tif	control	norm	15.286	8.177	5.11994	2.80922	-2.31072	0		0.836501	-0.688064	1
00000033_7.tif	control	norm	16.5	11.583	5.11994	3.82201	-1.29793	0		1.13808	-0.386485	1
00000033_7.tif	control	norm	15.87	12.021	5.11994	3.51363	-1.60631	0		1.04625	-0.47831	1
00000033_7.tif	control	norm	16	12.828	5.11994	4.14294	-0.976999	0		1.23364	-0.290921	1
00000033_7.tif	control	norm	15.771	13.562	5.11994	4.55073	-0.56921	0		1.35507	-0.169494	1
00000033_7.tif	control	norm	17.724	9.849	5.11994	4.65629	-0.463649	0		1.3865	-0.138061	1
00000045_8.tif	control	norm	11.573	13.5	4.96897	3.46724	-1.50173	0		1.03244	-0.44717	1
00000045_8.tif	control	norm	11.7	13.523	4.96897	3.35686	-1.61211	0		0.999571	-0.480039	1
00000045_8.tif	control	norm	12.339	12.481	4.96897	2.49118	-2.47779	0		0.741799	-0.737812	1
00000045_8.tif	control	norm	11.977	11.946	4.96897	2.86696	-2.10201	0		0.853693	-0.625917	1
00000045_8.tif	control	norm	12.005	11.759	4.96897	2.86796	-2.10101	0		0.853993	-0.625617	1
00000045_8.tif	control	norm	11.894	11.675	4.96897	2.99328	-1.97569	0		0.891309	-0.588301	1
00000045_8.tif	control	norm	14.04	14.835	4.96897	2.66082	-2.30815	0		0.792311	-0.687299	1
00000045_8.tif	control	norm	15.026	12.752	4.96897	0.502801	-4.46617	0		0.149719	-1.32989	1
00000045_8.tif	control	norm	15.477	13.516	4.96897	1.38777	-3.5812	0		0.413235	-1.06638	1
00000045_8.tif	control	norm	15.582	15.036	4.96897	2.84704	-2.12193	0		0.847762	-0.631848	1
00000045_8.tif	control	norm	15.984	11.682	4.96897	1.3115	-3.65747	0		0.390524	-1.08909	1
00000045_8.tif	control	norm	14.248	16.137	4.96897	3.88776	-1.08121	0		1.15766	-0.321953	1
00000045_8.tif	control	norm	14.45	15.818	4.96897	3.54567	-1.4233	0		1.0558	-0.423815	1
00000045_8.tif	control	norm	18.036	15.78	4.96897	4.74231	-0.226659	0		1.41212	-0.0674922	1
00000045_8.tif	control	norm	18.155	15.696	4.96897	4.76334	-0.205626	0		1.41838	-0.0612294	1
00000045_8.tif	control	norm	18.259	15.578	4.96897	4.75436	-0.214615	0		1.4157	-0.0639058	1
00000045_8.tif	control	norm	17.953	14.363	4.96897	3.75312	-1.21585	0		1.11757	-0.362042	1
00000045_8.tif	control	norm	18.224	14.12	4.96897	3.86114	-1.10783	0		1.14973	-0.329879	1
00000045_8.tif	control	norm	18.307	13.821	4.96897	3.80475	-1.16422	0		1.13294	-0.346671	1
00000045_8.tif	control	norm	18.648	12.974	4.96897	3.88532	-1.08365	0		1.15693	-0.322677	1
00000045_8.tif	control	norm	18.453	12.679	4.96897	3.65057	-1.3184	0		1.08703	-0.39258	1
0000005_47.tif	predator	norm	11.083	17.047	5.19796	6.66299	1.46503	1		1.98404	0.436243	3
0000005_47.tif	predator	norm	8.938	16.479	5.19796	7.02028	1.82232	1		2.09043	0.542631	3
0000005_47.tif	predator	norm	10.016	15.375	5.19796	5.51431	0.316355	1		1.642	0.0942012	3
0000005_47.tif	predator	norm	11.01	15.323	5.19796	5.04038	-0.157582	0		1.50087	-0.0469232	3
0000005_47.tif	predator	norm	11.328	14.99	5.19796	4.62041	-0.577547	0		1.37582	-0.171976	3
0000005_47.tif	predator	norm	12.255	14.766	5.19796	4.19511	-1.00285	0		1.24918	-0.298619	3
0000005_47.tif	predator	norm	9.896	14.443	5.19796	4.8022	-0.395757	0		1.42995	-0.117845	3
0000005_47.tif	predator	norm	9.797	14.385	5.19796	4.81666	-0.381299	0		1.43426	-0.113539	3
0000005_47.tif	predator	norm	10.312	11.88	5.19796	2.77923	-2.41873	0		0.827572	-0.720224	3
0000005_47.tif	predator	norm	8.995	11.125	5.19796	3.82168	-1.37628	0		1.13798	-0.409815	3
0000005_47.tif	predator	norm	9.521	10.562	5.19796	3.26027	-1.93769	0		0.970811	-0.576986	3
0000005_47.tif	predator	norm	9.927	10.312	5.19796	2.8689	-2.32906	0		0.854272	-0.693524	3
0000005_47.tif	predator	norm	9.729	10	5.19796	3.11119	-2.08677	0		0.92642	-0.621376	3
0000005_47.tif	predator	norm	9.859	9.964	5.19796	2.99127	-2.20669	0		0.89071	-0.657086	3
0000005_47.tif	predator	norm	10.646	8.552	5.19796	2.96124	-2.23672	0		0.881768	-0.666029	3
0000005_47.tif	predator	norm	11.87	7.094	5.19796	3.6263	-1.57166	0		1.0798	-0.467994	3
0000005_47.tif	predator	norm	12.229	7.146	5.19796	3.50178	-1.69618	0		1.04273	-0.505071	3
0000005_47.tif	predator	norm	12.281	7.031	5.19796	3.60781	-1.59014	0		1.0743	-0.473497	3
0000005_47.tif	predator	norm	12.052	6.333	5.19796	4.33277	-0.865191	0		1.29017	-0.257628	3
0000005_47.tif	predator	norm	12.573	6.115	5.19796	4.49382	-0.704143	0		1.33812	-0.209673	3
0000005_47.tif	predator	norm	13.073	5.703	5.19796	4.90969	-0.288268	0		1.46196	-0.0858376	3
0000005_47.tif	predator	norm	13.62	5.948	5.19796	4.73099	-0.46697	0		1.40875	-0.13905	3
0000005_47.tif	predator	norm	13.755	6.068	5.19796	4.63939	-0.558566	0		1.38147	-0.166324	3
0000005_47.tif	predator	norm	14.682	5.693	5.19796	5.26609	0.0681325	1		1.56808	0.0202878	3
0000005_47.tif	predator	norm	14.953	5.089	5.19796	5.92729	0.729334	1		1.76497	0.217174	3
0000005_47.tif	predator	norm	15.172	6.177	5.19796	5.03142	-0.166537	0		1.49821	-0.0495897	3
0000005_47.tif	predator	norm	14.083	6.401	5.19796	4.40005	-0.797912	0		1.3102	-0.237594	3
0000005_47.tif	predator	norm	14.224	6.776	5.19796	4.09095	-1.10701	0		1.21816	-0.329636	3
0000005_47.tif	predator	norm	14.349	6.823	5.19796	4.09324	-1.10472	0		1.21884	-0.328953	3
0000005_47.tif	predator	norm	14.438	6.766	5.19796	4.18042	-1.01754	0		1.2448	-0.302993	3
0000005_47.tif	predator	norm	14.464	6.943	5.19796	4.02932	-1.16864	0		1.19981	-0.347986	3
0000005_47.tif	predator	norm	13.677	8.047	5.19796	2.70944	-2.48852	0		0.80679	-0.741006	3
0000005_47.tif	predator	norm	13.224	9.656	5.19796	1.0464	-4.15156	0		0.311587	-1.23621	3
0000005_47.tif	predator	norm	16.266	9.495	5.19796	3.6572	-1.54076	0		1.089	-0.458792	3
0000005_47.tif	predator	norm	16.125	9.365	5.19796	3.56615	-1.6318	0		1.06189	-0.485903	3
0000005_47.tif	predator	norm	14.328	13.885	5.19796	3.62742	-1.57054	0		1.08014	-0.46766	3
0000005_47.tif	predator	norm	12.99	13.349	5.19796	2.75294	-2.44501	0		0.819744	-0.728052	3
0000005_47.tif	predator	norm	16.568	13.266	5.19796	4.629	-0.568962	0		1.37838	-0.16942	3
0000005_47.tif	predator	norm	16.234	14.411	5.19796	5.13969	-0.0582648	0		1.53045	-0.0173495	3
0000005_47.tif	predator	norm	16.062	14.385	5.19796	5.00609	-0.191871	0		1.49066	-0.0571333	3
0000005_47.tif	predator	norm	15.807	14.74	5.19796	5.12476	-0.0731985	0		1.526	-0.0217963	3
0000005_47.tif	predator	norm	14.38	15.531	5.19796	5.17997	-0.0179853	0		1.54244	-0.00535547	3
0000005_47.tif	predator	norm	14.141	15.115	5.19796	4.71155	-0.486407	0		1.40296	-0.144838	3
0000005_47.tif	predator	norm	17.188	14.156	5.19796	5.66024	0.462284	1		1.68545	0.137654	3
0000005_47.tif	predator	norm	16.667	14.026	5.19796	5.17794	-0.0200175	0		1.54184	-0.00596062	3
0000005_47.tif	predator	norm	17.526	11.677	5.19796	4.86481	-0.333151	0		1.44859	-0.0992025	3
0000007_80.tif	control	norm	11.116	12.248	5.17199	4.07105	-1.10094	0		1.21224	-0.327827	5
0000007_80.tif	control	norm	11.033	12.075	5.17199	4.06384	-1.10815	0		1.21009	-0.329974	5
0000007_80.tif	control	norm	11.894	11.474	5.17199	3.02928	-2.14271	0		0.902029	-0.638034	5
0000007_80.tif	control	norm	12.217	10.745	5.17199	2.50129	-2.6707	0		0.74481	-0.795254	5
0000007_80.tif	control	norm	10.717	10.519	5.17199	3.96308	-1.20891	0		1.18009	-0.359976	5
0000007_80.tif	control	norm	12.335	10.057	5.17199	2.34633	-2.82566	0		0.698666	-0.841398	5
0000007_80.tif	control	norm	10.516	8.894	5.17199	4.37661	-0.79538	0		1.30322	-0.23684	5
0000007_80.tif	control	norm	10.491	8.745	5.17199	4.44907	-0.722923	0		1.3248	-0.215265	5
0000007_80.tif	control	norm	10.523	8.602	5.17199	4.47025	-0.701745	0		1.33111	-0.208959	5
0000007_80.tif	control	norm	10.943	9.026	5.17199	3.92976	-1.24223	0		1.17017	-0.369898	5
0000007_80.tif	control	norm	11.224	9.155	5.17199	3.62257	-1.54942	0		1.07869	-0.461371	5
0000007_80.tif	control	norm	11.252	8.595	5.17199	3.80639	-1.3656	0		1.13343	-0.406634	5
0000007_80.tif	control	norm	10.918	8.061	5.17199	4.35368	-0.81831	0		1.2964	-0.243668	5
0000007_80.tif	control	norm	11.498	8.255	5.17199	3.75745	-1.41455	0		1.11885	-0.421209	5
0000007_80.tif	control	norm	11.571	8.061	5.17199	3.80503	-1.36696	0		1.13302	-0.407041	5
0000007_80.tif	control	norm	11.696	8.071	5.17199	3.69792	-1.47407	0		1.10113	-0.438935	5
0000007_80.tif	control	norm	12.05	8.377	5.17199	3.23159	-1.9404	0		0.962272	-0.577792	5
0000007_80.tif	control	norm	11.929	8.561	5.17199	3.22972	-1.94227	0		0.961713	-0.578351	5
0000007_80.tif	control	norm	11.918	7.679	5.17199	3.7785	-1.39349	0		1.12512	-0.414939	5
0000007_80.tif	control	norm	12.085	7.561	5.17199	3.74294	-1.42905	0		1.11454	-0.425529	5
0000007_80.tif	control	norm	12.252	7.582	5.17199	3.6139	-1.55809	0		1.07611	-0.463953	5
0000007_80.tif	control	norm	12.932	6.592	5.17199	4.0652	-1.10679	0		1.2105	-0.329568	5
0000007_80.tif	control	norm	12.79	6.45	5.17199	4.25485	-0.917137	0		1.26697	-0.273096	5
0000007_80.tif	control	norm	12.061	6.332	5.17199	4.72162	-0.450373	0		1.40596	-0.134108	5
0000007_80.tif	control	norm	12.175	6.13	5.17199	4.8313	-0.340686	0		1.43862	-0.101446	5
0000007_80.tif	control	norm	12.477	6.064	5.17199	4.74076	-0.431228	0		1.41166	-0.128407	5
0000007_80.tif	control	norm	12.644	5.842	5.17199	4.86668	-0.305312	0		1.44915	-0.0909129	5
0000007_80.tif	control	norm	13.016	7.293	5.17199	3.4031	-1.76889	0		1.01334	-0.526724	5
0000007_80.tif	control	norm	13.453	5.349	5.17199	5.06585	-0.10614	0		1.50846	-0.0316052	5
0000007_80.tif	control	norm	13.651	5.318	5.17199	5.05224	-0.119749	0		1.50441	-0.0356577	5
0000007_80.tif	control	norm	14.984	5.667	5.17199	4.60957	-0.56242	0		1.37259	-0.167472	5
0000007_80.tif	control	norm	14.984	5.667	5.17199	4.60957	-0.56242	0		1.37259	-0.167472	5
0000007_80.tif	control	norm	15.495	5.427	5.17199	4.90849	-0.263503	0		1.4616	-0.0784634	5
0000007_80.tif	control	norm	15.484	5.87	5.17199	4.47036	-0.701626	0		1.33114	-0.208923	5
0000007_80.tif	control	norm	15.245	6.042	5.17199	4.26269	-0.909303	0		1.2693	-0.270763	5
0000007_80.tif	control	norm	15.016	5.536	5.17199	4.74249	-0.429498	0		1.41217	-0.127892	5
0000007_80.tif	control	norm	15.672	7.599	5.17199	2.84831	-2.32368	0		0.848142	-0.691921	5
0000007_80.tif	control	norm	14.401	7.271	5.17199	3.00724	-2.16476	0		0.895465	-0.644599	5
0000007_80.tif	control	norm	14.599	7.948	5.17199	2.31915	-2.85284	0		0.690573	-0.849491	5
0000007_80.tif	control	norm	14.464	8.297	5.17199	1.97996	-3.19204	0		0.589571	-0.950492	5
0000007_80.tif	control	norm	14.375	8.146	5.17199	2.1407	-3.03129	0		0.637437	-0.902627	5
0000007_80.tif	control	norm	14.214	8.104	5.17199	2.20998	-2.96201	0		0.658066	-0.881998	5
0000007_80.tif	control	norm	14.208	8.234	5.17199	2.0843	-3.08769	0		0.620643	-0.919421	5
0000007_80.tif	control	norm	14.057	8.427	5.17199	1.93911	-3.23288	0		0.577409	-0.962655	5
0000007_80.tif	control	norm	14.141	8.688	5.17199	1.66495	-3.50704	0		0.495771	-1.04429	5
0000007_80.tif	control	norm	13.786	8.969	5.17199	1.57073	-3.60126	0		0.467717	-1.07235	5
0000007_80.tif	control	norm	13.88	9.203	5.17199	1.32561	-3.84638	0		0.394726	-1.14534	5
0000007_80.tif	control	norm	14.443	9.005	5.17199	1.28162	-3.89037	0		0.381629	-1.15843	5
0000007_80.tif	control	norm	15.026	8.984	5.17199	1.32998	-3.84201	0		0.396027	-1.14404	5
0000007_80.tif	control	norm	15.688	8.552	5.17199	1.9925	-3.17949	0		0.593306	-0.946757	5
0000007_80.tif	control	norm	14.849	10.083	5.17199	0.254594	-4.9174	0		0.0758104	-1.46425	5
0000007_80.tif	control	norm	12.536	11.365	5.17199	2.40214	-2.76985	0		0.715286	-0.824777	5
0000007_80.tif	control	norm	13.417	10.552	5.17199	1.28718	-3.88482	0		0.383282	-1.15678	5
0000007_80.tif	control	norm	12.448	13.609	5.17199	4.0152	-1.15679	0		1.19561	-0.344458	5
0000007_80.tif	control	norm	13.802	12.781	5.17199	2.66123	-2.51076	0		0.792433	-0.74763	5
0000007_80.tif	control	norm	14.667	15.203	5.17199	4.937	-0.234988	0		1.47009	-0.0699725	5
0000007_80.tif	control	norm	13.948	14.984	5.17199	4.77323	-0.398763	0		1.42132	-0.11874	5
0000007_80.tif	control	norm	13.646	14.635	5.17199	4.48785	-0.684136	0		1.33635	-0.203715	5
0000007_80.tif	control	norm	14.672	14.089	5.17199	3.823	-1.34899	0		1.13837	-0.401689	5
0000007_80.tif	control	norm	15.167	13.542	5.17199	3.31319	-1.8588	0		0.986567	-0.553496	5
0000007_80.tif	control	norm	15.63	13.698	5.17199	3.5632	-1.60879	0		1.06101	-0.47905	5
0000007_80.tif	control	norm	16.281	14.625	5.17199	4.64648	-0.525512	0		1.38358	-0.156482	5
0000007_80.tif	control	norm	17.568	11.479	5.17199	3.13977	-2.03222	0		0.934931	-0.605133	5
0000007_80.tif	control	norm	17.5	11.432	5.17199	3.05894	-2.11305	0		0.910862	-0.629202	5
0000007_80.tif	control	norm	17.292	11.781	5.17199	3.02649	-2.1455	0		0.901197	-0.638867	5
0000007_80.tif	control	norm	17.359	12.307	5.17199	3.37426	-1.79773	0		1.00475	-0.535309	5
0000007_80.tif	control	norm	17.396	12.208	5.17199	3.34538	-1.82661	0		0.996153	-0.543911	5
0000007_80.tif	control	norm	17.281	10.615	5.17199	2.63224	-2.53975	0		0.783802	-0.756262	5
0000007_80.tif	control	norm	16.938	10.38	5.17199	2.26887	-2.90313	0		0.6756	-0.864464	5
0000007_80.tif	control	norm	18.12	12.557	5.17199	4.13973	-1.03226	0		1.23269	-0.307376	5
0000007_80.tif	control	norm	15.792	7.943	5.17199	2.5789	-2.59309	0		0.767919	-0.772144	5
0000007_80.tif	control	norm	15.901	8.266	5.17199	2.34743	-2.82456	0		0.698995	-0.841069	5
0000007_80.tif	control	norm	16.036	8.24	5.17199	2.44237	-2.72962	0		0.727265	-0.812799	5
0000007_80.tif	control	norm	17.115	7.802	5.17199	3.4698	-1.70219	0		1.0332	-0.50686	5
0000007_80.tif	control	norm	17.224	7.87	5.17199	3.5005	-1.67149	0		1.04234	-0.497719	5
0000007_80.tif	control	norm	17.859	8.047	5.17199	3.88342	-1.28857	0		1.15637	-0.383699	5
0000007_80.tif	control	norm	15.844	8.677	5.17199	1.97446	-3.19753	0		0.587936	-0.952128	5
0000007_80.tif	control	norm	15.859	9.589	5.17199	1.36649	-3.8055	0		0.4069	-1.13316	5
0000007_80.tif	control	norm	16.182	9.562	5.17199	1.66605	-3.50594	0		0.496099	-1.04396	5
0000007_80.tif	control	norm	16.302	9.323	5.17199	1.88312	-3.28887	0		0.560737	-0.979326	5
0000007_80.tif	control	norm	16.245	9.25	5.17199	1.87259	-3.2994	0		0.5576	-0.982463	5
0000007_80.tif	control	norm	16.557	9.016	5.17199	2.2618	-2.91019	0		0.673495	-0.866568	5
0000007_80.tif	control	norm	17.286	8.88	5.17199	2.95871	-2.21328	0		0.881016	-0.659047	5
0000007_80.tif	control	norm	16.88	9.516	5.17199	2.3319	-2.84009	0		0.69437	-0.845693	5
0000007_80.tif	control	norm	17.984	9.312	5.17199	3.44666	-1.72533	0		1.02631	-0.513752	5
0000007_80.tif	control	norm	17.948	9.932	5.17199	3.29298	-1.87901	0		0.980551	-0.559512	5
0000007_80.tif	control	norm	18.115	9.953	5.17199	3.4572	-1.71479	0		1.02945	-0.510614	5
0000007_80.tif	control	norm	16.958	9.953	5.17199	2.30733	-2.86466	0		0.687053	-0.853011	5
0000007_80.tif	control	norm	16.781	9.901	5.17199	2.14035	-3.03164	0		0.637333	-0.902731	5
0000007_80.tif	control	norm	16.438	7.281	5.17199	3.46828	-1.70371	0		1.03275	-0.507313	5
0000007_80.tif	control	norm	15.938	6.693	5.17199	3.79066	-1.38133	0		1.12874	-0.41132	5
0000007_80.tif	control	norm	16.172	6.568	5.17199	3.99064	-1.18135	0		1.18829	-0.351771	5
0000007_80.tif	control	norm	16.214	6.109	5.17199	4.43378	-0.73821	0		1.32025	-0.219817	5
0000007_80.tif	control	norm	15.995	5.875	5.17199	4.58598	-0.586011	0		1.36557	-0.174497	5
0000007_80.tif	control	norm	16.099	5.828	5.17199	4.66178	-0.510213	0		1.38814	-0.151926	5
0000007_80.tif	control	norm	16.677	6.073	5.17199	4.64772	-0.524274	0		1.38395	-0.156113	5
0000008_58.tif	predator	norm	11.135	15.604	5.22916	4.41491	-0.81425	0		1.31463	-0.242459	2
0000008_58.tif	predator	norm	9.797	13.835	5.22916	4.43465	-0.79451	0		1.32051	-0.236581	2
0000008_58.tif	predator	norm	9.589	12.988	5.22916	4.39437	-0.834783	0		1.30851	-0.248573	2
0000008_58.tif	predator	norm	8.991	11.543	5.22916	4.95445	-0.274705	0		1.47529	-0.081799	2
0000008_58.tif	predator	norm	10.047	11.307	5.22916	3.95367	-1.27549	0		1.17728	-0.379803	2
0000008_58.tif	predator	norm	10.214	11.3	5.22916	3.79243	-1.43672	0		1.12927	-0.427813	2
0000008_58.tif	predator	norm	9.852	10.422	5.22916	4.41361	-0.815549	0		1.31424	-0.242846	2
0000008_58.tif	predator	norm	10.609	9.602	5.22916	4.17725	-1.05191	0		1.24386	-0.313226	2
0000008_58.tif	predator	norm	11.755	9.72	5.22916	3.25801	-1.97115	0		0.970137	-0.58695	2
0000008_58.tif	predator	norm	11.741	9.568	5.22916	3.38261	-1.84655	0		1.00724	-0.549848	2
0000008_58.tif	predator	norm	11.839	9.318	5.22916	3.51984	-1.70932	0		1.0481	-0.508983	2
0000008_58.tif	predator	norm	11.575	9.172	5.22916	3.79521	-1.43395	0		1.1301	-0.426988	2
0000008_58.tif	predator	norm	12.443	8.356	5.22916	4.08217	-1.14699	0		1.21555	-0.341539	2
0000008_58.tif	predator	norm	14.078	8.481	5.22916	3.69001	-1.53915	0		1.09877	-0.458312	2
0000008_58.tif	predator	norm	15.571	7.738	5.22916	4.73162	-0.497534	0		1.40894	-0.148151	2
0000008_58.tif	predator	norm	14.571	9.981	5.22916	2.28491	-2.94425	0		0.680378	-0.876708	2
0000008_58.tif	predator	norm	15.474	14.991	5.22916	3.23011	-1.99905	0		0.961829	-0.595257	2
0000008_58.tif	predator	norm	14.585	15.859	5.22916	3.75392	-1.47524	0		1.1178	-0.439282	2
0000008_58.tif	predator	norm	14.536	16.026	5.22916	3.91009	-1.31907	0		1.16431	-0.39278	2
0000008_58.tif	predator	norm	14.911	15.547	5.22916	3.52625	-1.70291	0		1.05001	-0.507075	2
0000008_58.tif	predator	norm	15.891	13.97	5.22916	2.68161	-2.54755	0		0.798503	-0.758583	2
0000008_58.tif	predator	norm	17.03	13.79	5.22916	3.52044	-1.70872	0		1.04828	-0.508805	2
0000008_58.tif	predator	norm	17.238	13.859	5.22916	3.73699	-1.49217	0		1.11276	-0.444323	2
0000008_58.tif	predator	norm	17.349	15.012	5.22916	4.46635	-0.762809	0		1.32994	-0.227142	2
0000008_58.tif	predator	norm	16.425	8.741	5.22916	4.25239	-0.976766	0		1.26623	-0.290852	2
0000008_58.tif	predator	norm	21.87	6.495	5.22916	9.77737	4.54821	1		2.91141	1.35432	2
0000008_58.tif	predator	norm	19.953	4.057	5.22916	10.1162	4.88708	1		3.01231	1.45523	2
00000098_9.tif	control	norm	10.104	9.531	5.14595	3.2421	-1.90385	0		0.965401	-0.56691	1
00000098_9.tif	control	norm	10.217	8.623	5.14595	3.3875	-1.75845	0		1.0087	-0.523615	1
00000098_9.tif	control	norm	12.342	5.998	5.14595	4.11788	-1.02808	0		1.22618	-0.306131	1
00000098_9.tif	control	norm	11.203	5.408	5.14595	5.05315	-0.0928014	0		1.50468	-0.0276335	1
00000098_9.tif	control	norm	12.064	11.911	5.14595	2.28242	-2.86354	0		0.679635	-0.852675	1
00000098_9.tif	control	norm	13.092	13.543	5.14595	3.54982	-1.59613	0		1.05703	-0.47528	1
00000098_9.tif	control	norm	14.613	12.502	5.14595	2.82004	-2.32592	0		0.839722	-0.692588	1
00000098_9.tif	control	norm	14.703	12.62	5.14595	2.96636	-2.1796	0		0.883292	-0.649018	1
00000098_9.tif	control	norm	14.957	11.543	5.14595	2.25541	-2.89054	0		0.671593	-0.860717	1
00000098_9.tif	control	norm	15.068	11.648	5.14595	2.4082	-2.73775	0		0.717091	-0.81522	1
00000098_9.tif	control	norm	15.79	9.599	5.14595	2.51024	-2.63572	0		0.747473	-0.784838	1
00000098_9.tif	control	norm	15.998	8.443	5.14595	3.10465	-2.0413	0		0.924471	-0.607839	1
00000098_9.tif	control	norm	16.137	8.352	5.14595	3.27055	-1.8754	0		0.973873	-0.558437	1
00000098_9.tif	control	norm	15.887	8.127	5.14595	3.18414	-1.96181	0		0.948142	-0.584169	1
00000098_9.tif	control	norm	15.915	7.648	5.14595	3.50821	-1.63775	0		1.04464	-0.487672	1
00000098_9.tif	control	norm	15.991	7.523	5.14595	3.64864	-1.49731	0		1.08646	-0.445855	1
00000098_9.tif	control	norm	18.391	3.391	5.14595	8.33517	3.18922	1		2.48196	0.949654	1
00000098_9.tif	control	norm	18.432	3.599	5.14595	8.19678	3.05083	1		2.44076	0.908445	1
00000098_9.tif	control	norm	5.536	14.932	5.14595	9.20819	4.06224	1		2.74192	1.20961	1
00000098_9.tif	control	norm	5.682	14.995	5.14595	9.11959	3.97364	1		2.71554	1.18323	1
00000098_9.tif	control	norm	5.78	15.161	5.14595	9.13055	3.9846	1		2.7188	1.18649	1
00000098_9.tif	control	norm	5.793	15.349	5.14595	9.22752	4.08157	1		2.74768	1.21537	1
00000098_9.tif	control	norm	5.467	15.62	5.14595	9.65031	4.50435	1		2.87357	1.34126	1
0000010_63.tif	control	norm	6.312	8.677	5.17199	8.09371	2.92172	1		2.41007	0.870001	4
0000010_63.tif	control	norm	6.167	8.833	5.17199	8.16955	2.99756	1		2.43265	0.892583	4
0000010_63.tif	control	norm	11.531	9.755	5.17199	3.0415	-2.13049	0		0.905668	-0.634396	4
0000010_63.tif	control	norm	11.651	9.854	5.17199	2.88615	-2.28585	0		0.859407	-0.680656	4
0000010_63.tif	control	norm	11.391	9.953	5.17199	3.02085	-2.15114	0		0.899519	-0.640545	4
0000010_63.tif	control	norm	11.776	10.74	5.17199	2.26682	-2.90517	0		0.674992	-0.865072	4
0000010_63.tif	control	norm	11.792	10.891	5.17199	2.18525	-2.98674	0		0.650702	-0.889362	4
0000010_63.tif	control	norm	11.417	10.875	5.17199	2.53644	-2.63556	0		0.755274	-0.784789	4
0000010_63.tif	control	norm	10.807	10.062	5.17199	3.44383	-1.72816	0		1.02547	-0.514594	4
0000010_63.tif	control	norm	10.688	10.089	5.17199	3.53373	-1.63826	0		1.05224	-0.487824	4
0000010_63.tif	control	norm	10.531	10.651	5.17199	3.44476	-1.72723	0		1.02575	-0.514318	4
0000010_63.tif	control	norm	10.734	10.854	5.17199	3.18778	-1.98421	0		0.949227	-0.590837	4
0000010_63.tif	control	norm	10.333	10.625	5.17199	3.64024	-1.53175	0		1.08396	-0.456108	4
0000010_63.tif	control	norm	10.229	10.583	5.17199	3.75225	-1.41974	0		1.11731	-0.422756	4
0000010_63.tif	control	norm	9.073	10.708	5.17199	4.8297	-0.34229	0		1.43814	-0.101924	4
0000010_63.tif	control	norm	9.151	11.292	5.17199	4.65358	-0.518406	0		1.3857	-0.154366	4
0000010_63.tif	control	norm	9.005	12.12	5.17199	4.78126	-0.390735	0		1.42371	-0.116349	4
0000010_63.tif	control	norm	9.422	12.552	5.17199	4.41728	-0.754713	0		1.31533	-0.224731	4
0000010_63.tif	control	norm	10.276	12.667	5.17199	3.60411	-1.56788	0		1.0732	-0.466868	4
0000010_63.tif	control	norm	10.938	13.156	5.17199	3.1423	-2.02969	0		0.935682	-0.604381	4
0000010_63.tif	control	norm	10.161	13.906	5.17199	4.18019	-0.991796	0		1.24474	-0.295327	4
0000010_63.tif	control	norm	9.88	15.229	5.17199	5.18545	0.0134599	1		1.54407	0.00400796	4
0000010_63.tif	control	norm	13.193	15.464	5.17199	3.70318	-1.46881	0		1.1027	-0.437368	4
0000010_63.tif	control	norm	13.974	15.172	5.17199	3.37082	-1.80117	0		1.00373	-0.536335	4
0000010_63.tif	control	norm	14.078	15.182	5.17199	3.38848	-1.78351	0		1.00899	-0.531075	4
0000010_63.tif	control	norm	14.161	15.089	5.17199	3.3045	-1.86749	0		0.983982	-0.556081	4
0000010_63.tif	control	norm	14.05	14.964	5.17199	3.16887	-2.00312	0		0.943594	-0.59647	4
0000010_63.tif	control	norm	14.016	14.786	5.17199	2.98865	-2.18334	0		0.889931	-0.650133	4
0000010_63.tif	control	norm	13.957	14.599	5.17199	2.79786	-2.37413	0		0.833119	-0.706945	4
0000010_63.tif	control	norm	13.946	14.443	5.17199	2.64148	-2.53051	0		0.786552	-0.753511	4
0000010_63.tif	control	norm	14.318	14.172	5.17199	2.42631	-2.74568	0		0.722483	-0.817581	4
0000010_63.tif	control	norm	13.602	13.613	5.17199	1.81436	-3.35763	0		0.540263	-0.999801	4
0000010_63.tif	control	norm	11.661	8.259	5.17199	4.13056	-1.04143	0		1.22996	-0.310107	4
0000010_63.tif	control	norm	12.293	8.53	5.17199	3.59695	-1.57505	0		1.07106	-0.469001	4
0000010_63.tif	control	norm	12.401	8.571	5.17199	3.51601	-1.65598	0		1.04696	-0.493102	4
0000010_63.tif	control	norm	13.616	8.439	5.17199	3.3718	-1.80019	0		1.00402	-0.536043	4
0000010_63.tif	control	norm	12.884	9.766	5.17199	2.22741	-2.94458	0		0.663255	-0.876809	4
0000010_63.tif	control	norm	15.026	10.082	5.17199	2.13029	-3.0417	0		0.634336	-0.905728	4
0000010_63.tif	control	norm	15.116	10.061	5.17199	2.20094	-2.97106	0		0.655372	-0.884691	4
0000010_63.tif	control	norm	16.089	10.286	5.17199	2.76829	-2.4037	0		0.824313	-0.715751	4
0000010_63.tif	control	norm	16.137	10.203	5.17199	2.85432	-2.31767	0		0.849931	-0.690133	4
0000010_63.tif	control	norm	17.318	11.342	5.17199	3.57239	-1.5996	0		1.06375	-0.476312	4
0000010_63.tif	control	norm	17.141	11.873	5.17199	3.36565	-1.80634	0		1.00219	-0.537875	4
0000010_63.tif	control	norm	17.582	12.832	5.17199	3.94161	-1.23038	0		1.17369	-0.366372	4
0000010_63.tif	control	norm	15.984	12.745	5.17199	2.39898	-2.77301	0		0.714344	-0.825719	4
0000010_63.tif	control	norm	15.786	13.575	5.17199	2.67692	-2.49507	0		0.797108	-0.742956	4
0000010_63.tif	control	norm	15.741	13.651	5.17199	2.69473	-2.47726	0		0.802409	-0.737654	4
0000010_63.tif	control	norm	16.703	13.068	5.17199	3.18708	-1.98492	0		0.949015	-0.591048	4
0000010_63.tif	control	norm	16.845	13.109	5.17199	3.33376	-1.83823	0		0.992694	-0.54737	4
0000010_63.tif	control	norm	16.995	13.127	5.17199	3.47913	-1.69286	0		1.03598	-0.504083	4
0000010_63.tif	control	norm	14.516	13.948	5.17199	2.26528	-2.90671	0		0.674532	-0.865532	4
0000010_63.tif	control	norm	21.252	18.259	5.17199	9.87516	4.70317	1		2.94053	1.40046	4
0000010_63.tif	control	norm	20.884	18.002	5.17199	9.42877	4.25678	1		2.8076	1.26754	4
0000010_63.tif	control	norm	20.793	18.016	5.17199	9.36963	4.19764	1		2.78999	1.24993	4
0000010_63.tif	control	norm	20.62	18.148	5.17199	9.32998	4.15799	1		2.77819	1.23813	4
0000010_63.tif	control	norm	20.592	18.266	5.17199	9.39024	4.21825	1		2.79613	1.25607	4
0000011_29.tif	predator	norm	10.026	14.229	5.16691	6.01726	0.850349	1		1.79176	0.253209	2
0000011_29.tif	predator	norm	10.615	13.932	5.16691	5.35797	0.191064	1		1.59544	0.0568931	2
0000011_29.tif	predator	norm	10.536	13.255	5.16691	5.14043	-0.0264852	0		1.53066	-0.00788649	2
0000011_29.tif	predator	norm	11.448	13.74	5.16691	4.54131	-0.625601	0		1.35227	-0.186285	2
0000011_29.tif	predator	norm	12.167	13.667	5.16691	3.90397	-1.26294	0		1.16249	-0.376065	2
0000011_29.tif	predator	norm	12.51	15.026	5.16691	4.61896	-0.547951	0		1.37539	-0.163163	2
0000011_29.tif	predator	norm	13.63	14.688	5.16691	3.73426	-1.43265	0		1.11195	-0.426601	2
0000011_29.tif	predator	norm	12.927	12.797	5.16691	2.78756	-2.37935	0		0.830051	-0.7085	2
0000011_29.tif	predator	norm	11.693	13.417	5.16691	4.16571	-1.0012	0		1.24042	-0.298128	2
0000011_29.tif	predator	norm	11.729	13.312	5.16691	4.08309	-1.08382	0		1.21582	-0.322728	2
0000011_29.tif	predator	norm	11.63	13.292	5.16691	4.16089	-1.00603	0		1.23899	-0.299564	2
0000011_29.tif	predator	norm	11.641	13.161	5.16691	4.09164	-1.07527	0		1.21837	-0.320184	2
0000011_29.tif	predator	norm	12.406	7.651	5.16691	4.70713	-0.459784	0		1.40164	-0.13691	2
0000011_29.tif	predator	norm	14.328	5.969	5.16691	5.47416	0.307254	1		1.63004	0.091491	2
0000011_29.tif	predator	norm	15.203	6.443	5.16691	4.91221	-0.254701	0		1.46271	-0.0758424	2
0000011_29.tif	predator	norm	14.552	7.401	5.16691	4.0254	-1.14152	0		1.19864	-0.339909	2
0000011_29.tif	predator	norm	14.307	11.932	5.16691	1.15936	-4.00755	0		0.345222	-1.19333	2
0000011_29.tif	predator	norm	15.568	14.406	5.16691	3.06272	-2.10419	0		0.911985	-0.626566	2
0000011_29.tif	predator	norm	17.12	13.995	5.16691	3.20059	-1.96633	0		0.953038	-0.585513	2
0000011_29.tif	predator	norm	17.021	13.87	5.16691	3.04154	-2.12538	0		0.905678	-0.632873	2
0000011_29.tif	predator	norm	17.172	13.599	5.16691	2.91541	-2.2515	0		0.868122	-0.670429	2
0000011_29.tif	predator	norm	17.714	13.688	5.16691	3.3492	-1.81771	0		0.997292	-0.541259	2
0000011_29.tif	predator	norm	18.51	13.552	5.16691	3.88052	-1.28639	0		1.1555	-0.38305	2
0000011_29.tif	predator	norm	17.958	12.245	5.16691	2.79199	-2.37492	0		0.83137	-0.707181	2
0000011_29.tif	predator	norm	19.969	10.734	5.16691	4.69809	-0.468821	0		1.39895	-0.139601	2
0000011_29.tif	predator	norm	19.922	10.557	5.16691	4.67839	-0.488523	0		1.39308	-0.145468	2
0000011_29.tif	predator	norm	22.012	9.752	5.16691	6.88886	1.72195	1		2.0513	0.512745	2
0000011_29.tif	predator	norm	20.852	7.884	5.16691	6.53701	1.3701	1		1.94653	0.407974	2
0000011_29.tif	predator	norm	19.429	9.113	5.16691	4.68741	-0.479505	0		1.39577	-0.142782	2
0000011_29.tif	predator	norm	18.394	8.717	5.16691	4.05617	-1.11074	0		1.2078	-0.330746	2
0000011_29.tif	predator	norm	16.977	9.453	5.16691	2.52706	-2.63985	0		0.752482	-0.786069	2
0000011_29.tif	predator	norm	17.29	7.043	5.16691	4.74312	-0.423789	0		1.41236	-0.126192	2
0000013_27.tif	control	norm	6.615	14.073	5.19796	8.28107	3.08311	1		2.46585	0.918058	2
0000013_27.tif	control	norm	6.595	13.964	5.19796	8.28612	3.08816	1		2.46736	0.91956	2
0000013_27.tif	control	norm	10.984	13.575	5.19796	3.88775	-1.31021	0		1.15766	-0.39014	2
0000013_27.tif	control	norm	11.075	13.533	5.19796	3.7909	-1.40706	0		1.12882	-0.418979	2
0000013_27.tif	control	norm	11.29	13.443	5.19796	3.56422	-1.63374	0		1.06132	-0.486477	2
0000013_27.tif	control	norm	11.561	13.491	5.19796	3.305	-1.89296	0		0.98413	-0.563666	2
0000013_27.tif	control	norm	11.026	12.873	5.19796	3.78607	-1.41189	0		1.12738	-0.420418	2
0000013_27.tif	control	norm	11.123	12.811	5.19796	3.68998	-1.50798	0		1.09877	-0.449031	2
0000013_27.tif	control	norm	11.637	12.436	5.19796	3.20815	-1.98981	0		0.955291	-0.592506	2
0000013_27.tif	control	norm	11.644	12.179	5.19796	3.24812	-1.94983	0		0.967194	-0.580602	2
0000013_27.tif	control	norm	11.762	12.193	5.19796	3.12997	-2.06799	0		0.932011	-0.615785	2
0000013_27.tif	control	norm	12.151	13.234	5.19796	2.68238	-2.51558	0		0.798732	-0.749064	2
0000013_27.tif	control	norm	12.394	12.887	5.19796	2.41802	-2.77994	0		0.720013	-0.827783	2
0000013_27.tif	control	norm	12.443	13.068	5.19796	2.37524	-2.82272	0		0.707274	-0.840522	2
0000013_27.tif	control	norm	12.769	11.505	5.19796	2.47158	-2.72637	0		0.735964	-0.811833	2
0000013_27.tif	control	norm	14.741	10.616	5.19796	2.28111	-2.91685	0		0.679245	-0.868552	2
0000013_27.tif	control	norm	14.686	10.707	5.19796	2.19262	-3.00534	0		0.652897	-0.894899	2
0000013_27.tif	control	norm	15.693	10.234	5.19796	2.804	-2.39396	0		0.834946	-0.71285	2
0000013_27.tif	control	norm	15.7	10.109	5.19796	2.92505	-2.27291	0		0.870992	-0.676804	2
0000013_27.tif	control	norm	17.484	10.561	5.19796	3.54849	-1.64947	0		1.05664	-0.491161	2
0000013_27.tif	control	norm	17.582	11.102	5.19796	3.3002	-1.89776	0		0.982701	-0.565095	2
0000013_27.tif	control	norm	16.998	12.498	5.19796	2.22194	-2.97602	0		0.661626	-0.88617	2
0000013_27.tif	control	norm	15.575	14.349	5.19796	1.64115	-3.55681	0		0.488686	-1.05911	2
0000013_27.tif	control	norm	16.512	14.335	5.19796	2.22727	-2.97069	0		0.663213	-0.884583	2
0000013_27.tif	control	norm	17.311	13.405	5.19796	2.55031	-2.64765	0		0.759406	-0.78839	2
0000013_27.tif	control	norm	17.318	13.328	5.19796	2.54296	-2.655	0		0.757218	-0.790578	2
0000013_27.tif	control	norm	16.72	15.543	5.19796	3.26299	-1.93497	0		0.971619	-0.576177	2
0000013_27.tif	control	norm	15.984	16.217	5.19796	3.52174	-1.67622	0		1.04867	-0.499129	2
0000013_27.tif	control	norm	12.63	16.439	5.19796	4.16101	-1.03695	0		1.23902	-0.308773	2
0000013_27.tif	control	norm	13.068	17.738	5.19796	5.1465	-0.0514555	0		1.53247	-0.0153219	2
0000013_27.tif	control	norm	23.818	14.866	5.19796	9.21894	4.02099	1		2.74513	1.19733	2
0000013_27.tif	control	norm	23.762	14.755	5.19796	9.14103	3.94307	1		2.72192	1.17413	2
0000013_27.tif	control	norm	23.818	14.589	5.19796	9.16375	3.96579	1		2.72869	1.18089	2
0000013_27.tif	control	norm	23.922	14.464	5.19796	9.24396	4.046	1		2.75257	1.20478	2
0000013_27.tif	control	norm	24.366	14.477	5.19796	9.68393	4.48597	1		2.88358	1.33579	2
0000014_99.tif	control	norm	6.458	7.557	5.35944	8.25652	2.89708	1		2.45855	0.862663	6
0000014_99.tif	control	norm	6.578	7.417	5.35944	8.24759	2.88814	1		2.45588	0.860002	6
0000014_99.tif	control	norm	8.323	11.443	5.35944	4.84058	-0.518868	0		1.44138	-0.154503	6
0000014_99.tif	control	norm	8.531	11.88	5.35944	4.55411	-0.805335	0		1.35608	-0.239805	6
0000014_99.tif	control	norm	8.62	10.672	5.35944	4.79757	-0.561874	0		1.42857	-0.167309	6
0000014_99.tif	control	norm	8.688	10.047	5.35944	5.01549	-0.343958	0		1.49346	-0.10242	6
0000014_99.tif	control	norm	9.786	10.359	5.35944	3.91789	-1.44156	0		1.16663	-0.429252	6
0000014_99.tif	control	norm	9.87	10.365	5.35944	3.84509	-1.51436	0		1.14495	-0.450931	6
0000014_99.tif	control	norm	10.01	10.307	5.35944	3.76487	-1.59457	0		1.12107	-0.474815	6
0000014_99.tif	control	norm	10.349	10.651	5.35944	3.28858	-2.07086	0		0.979242	-0.61664	6
0000014_99.tif	control	norm	11.12	10.677	5.35944	2.6773	-2.68214	0		0.797221	-0.798661	6
0000014_99.tif	control	norm	11.089	11.094	5.35944	2.42941	-2.93004	0		0.723405	-0.872477	6
0000014_99.tif	control	norm	11.391	11.026	5.35944	2.24042	-3.11903	0		0.667129	-0.928753	6
0000014_99.tif	control	norm	11.193	9.984	5.35944	3.15684	-2.20261	0		0.940011	-0.655871	6
0000014_99.tif	control	norm	11.495	9.964	5.35944	3.00775	-2.35169	0		0.895618	-0.700264	6
0000014_99.tif	control	norm	8.958	13.479	5.35944	4.18315	-1.1763	0		1.24562	-0.350267	6
0000014_99.tif	control	norm	10.021	13.052	5.35944	3.057	-2.30244	0		0.910283	-0.685599	6
0000014_99.tif	control	norm	9.62	12.422	5.35944	3.41829	-1.94116	0		1.01786	-0.578019	6
0000014_99.tif	control	norm	8.536	14.521	5.35944	4.91393	-0.445518	0		1.46322	-0.132662	6
0000014_99.tif	control	norm	11.26	15.255	5.35944	3.23843	-2.12101	0		0.964308	-0.631574	6
0000014_99.tif	control	norm	11.349	15.182	5.35944	3.12877	-2.23068	0		0.931653	-0.664228	6
0000014_99.tif	control	norm	11.562	15.839	5.35944	3.60693	-1.75252	0		1.07404	-0.521846	6
0000014_99.tif	control	norm	14.953	17.917	5.35944	5.70191	0.342466	1		1.69786	0.101976	6
0000014_99.tif	control	norm	15.042	17.688	5.35944	5.51851	0.159062	1		1.64325	0.0473639	6
0000014_99.tif	control	norm	14.927	17.443	5.35944	5.24849	-0.11095	0		1.56284	-0.0330376	6
0000014_99.tif	control	norm	15.151	16.656	5.35944	4.62137	-0.73807	0		1.37611	-0.219775	6
0000014_99.tif	control	norm	15.396	15.677	5.35944	3.92001	-1.43943	0		1.16726	-0.42862	6
0000014_99.tif	control	norm	14.057	15.505	5.35944	3.12925	-2.23019	0		0.931797	-0.664085	6
0000014_99.tif	control	norm	14.25	17.12	5.35944	4.7314	-0.628047	0		1.40887	-0.187014	6
0000014_99.tif	control	norm	13.891	17.453	5.35944	4.97995	-0.379499	0		1.48288	-0.113003	6
0000014_99.tif	control	norm	13.776	17.411	5.35944	4.91997	-0.439476	0		1.46502	-0.130863	6
0000014_99.tif	control	norm	12.391	15.75	5.35944	3.2673	-2.09215	0		0.972903	-0.622979	6
0000014_99.tif	control	norm	12.583	15.688	5.35944	3.1735	-2.18595	0		0.944973	-0.650909	6
0000014_99.tif	control	norm	12.474	15.62	5.35944	3.12397	-2.23548	0		0.930224	-0.665658	6
0000014_99.tif	control	norm	12.573	15.542	5.35944	3.03058	-2.32887	0		0.902415	-0.693467	6
0000014_99.tif	control	norm	12.365	15.682	5.35944	3.206	-2.15344	0		0.954652	-0.64123	6
0000014_99.tif	control	norm	12.443	15.318	5.35944	2.83374	-2.5257	0		0.843803	-0.752079	6
0000014_99.tif	control	norm	12.391	15.198	5.35944	2.72834	-2.63111	0		0.812417	-0.783465	6
0000014_99.tif	control	norm	12.865	14.792	5.35944	2.2515	-3.10794	0		0.67043	-0.925452	6
0000014_99.tif	control	norm	13.24	14.698	5.35944	2.16065	-3.19879	0		0.643377	-0.952505	6
0000014_99.tif	control	norm	14.406	14.656	5.35944	2.51491	-2.84453	0		0.748865	-0.847017	6
0000014_99.tif	control	norm	12.365	14.016	5.35944	1.61499	-3.74445	0		0.480896	-1.11499	6
0000014_99.tif	control	norm	14.87	13.823	5.35944	2.23422	-3.12523	0		0.665283	-0.930599	6
0000014_99.tif	control	norm	15.547	14.406	5.35944	3.12426	-2.23518	0		0.930311	-0.665571	6
0000014_99.tif	control	norm	15.818	14.609	5.35944	3.46286	-1.89659	0		1.03113	-0.564747	6
0000014_99.tif	control	norm	15.75	14.526	5.35944	3.3589	-2.00054	0		1.00018	-0.595701	6
0000014_99.tif	control	norm	14.729	13.224	5.35944	1.82334	-3.5361	0		0.542937	-1.05295	6
0000014_99.tif	control	norm	14.844	13.193	5.35944	1.91994	-3.4395	0		0.571701	-1.02418	6
0000014_99.tif	control	norm	15.26	12.786	5.35944	2.23681	-3.12264	0		0.666053	-0.929828	6
0000014_99.tif	control	norm	15.312	12.698	5.35944	2.281	-3.07844	0		0.679214	-0.916667	6
0000014_99.tif	control	norm	13.151	11.656	5.35944	0.898391	-4.46105	0		0.267514	-1.32837	6
0000014_99.tif	control	norm	13.234	11.573	5.35944	0.993922	-4.36552	0		0.29596	-1.29992	6
0000014_99.tif	control	norm	13.432	11.547	5.35944	1.07555	-4.28389	0		0.320268	-1.27561	6
0000014_99.tif	control	norm	14.776	11.021	5.35944	2.31436	-3.04508	0		0.689148	-0.906734	6
0000014_99.tif	control	norm	14.688	10.984	5.35944	2.27422	-3.08523	0		0.677194	-0.918688	6
0000014_99.tif	control	norm	15.469	10.594	5.35944	3.11989	-2.23956	0		0.929009	-0.666873	6
0000014_99.tif	control	norm	15.62	11.375	5.35944	2.83736	-2.52208	0		0.844882	-0.751	6
0000014_99.tif	control	norm	15.589	11.521	5.35944	2.75145	-2.60799	0		0.8193	-0.776582	6
0000014_99.tif	control	norm	12.583	10.057	5.35944	2.53087	-2.82857	0		0.753618	-0.842264	6
0000014_99.tif	control	norm	13.255	9.438	5.35944	3.1167	-2.24274	0		0.928061	-0.667821	6
0000014_99.tif	control	norm	13.078	9.401	5.35944	3.14628	-2.21316	0		0.936868	-0.659014	6
0000014_99.tif	control	norm	13.688	9.203	5.35944	3.40697	-1.95248	0		1.01449	-0.581389	6
0000014_99.tif	control	norm	12.427	8.771	5.35944	3.8248	-1.53465	0		1.13891	-0.456973	6
0000014_99.tif	control	norm	12.391	8.703	5.35944	3.89774	-1.46171	0		1.16063	-0.435252	6
0000014_99.tif	control	norm	11.906	8.391	5.35944	4.30688	-1.05256	0		1.28246	-0.313421	6
0000014_99.tif	control	norm	16.292	11.667	5.35944	3.37282	-1.98662	0		1.00433	-0.591556	6
0000014_99.tif	control	norm	17.031	11.495	5.35944	4.13119	-1.22825	0		1.23014	-0.365737	6
0000014_99.tif	control	norm	16.979	11.526	5.35944	4.07304	-1.2864	0		1.21283	-0.383051	6
0000014_99.tif	control	norm	16.484	12.849	5.35944	3.4612	-1.89824	0		1.03064	-0.56524	6
0000014_99.tif	control	norm	16.245	13.255	5.35944	3.28617	-2.07327	0		0.978524	-0.617358	6
0000014_99.tif	control	norm	16.521	14.292	5.35944	3.89747	-1.46198	0		1.16055	-0.435333	6
0000014_99.tif	control	norm	16.188	14.667	5.35944	3.79862	-1.56083	0		1.13111	-0.464767	6
0000015_10.tif	predator	norm	11.484	7.557	4.93761	4.78138	-0.156227	0		1.42375	-0.0465198	1
0000015_10.tif	predator	norm	11.458	7.667	4.93761	4.71379	-0.223815	0		1.40363	-0.0666455	1
0000015_10.tif	predator	norm	11.219	7.849	4.93761	4.74025	-0.197356	0		1.41151	-0.0587667	1
0000015_10.tif	predator	norm	12.328	8.198	4.93761	3.75818	-1.17943	0		1.11907	-0.351197	1
0000015_10.tif	predator	norm	12.995	10.667	4.93761	1.63357	-3.30404	0		0.486429	-0.983843	1
0000015_10.tif	predator	norm	9.885	10.771	4.93761	4.66068	-0.27693	0		1.38781	-0.0824614	1
0000015_10.tif	predator	norm	11.146	11.911	4.93761	3.43912	-1.49849	0		1.02407	-0.446205	1
0000015_10.tif	predator	norm	11.125	12.062	4.93761	3.49173	-1.44588	0		1.03973	-0.43054	1
0000015_10.tif	predator	norm	15.354	16.427	4.93761	5.24359	0.305978	1		1.56138	0.0911112	1
0000015_10.tif	predator	norm	14.724	15.292	4.93761	4.04709	-0.890515	0		1.2051	-0.265169	1
0000015_10.tif	predator	norm	14.589	14.526	4.93761	3.27671	-1.6609	0		0.975705	-0.494567	1
0000015_10.tif	predator	norm	17.016	8.24	4.93761	3.90962	-1.02799	0		1.16417	-0.306105	1
0000015_10.tif	predator	norm	15.818	7.573	4.93761	3.89904	-1.03857	0		1.16102	-0.309254	1
0000015_10.tif	predator	norm	19.25	11.995	4.93761	4.78732	-0.150286	0		1.42552	-0.0447508	1
0000015_66.tif	predator	norm	7.125	10.01	5.25	5.0057	-0.2443	0		1.49055	-0.0727453	4
0000015_66.tif	predator	norm	7.245	9.929	5.25	4.89728	-0.352711	0		1.45826	-0.105027	4
0000015_66.tif	predator	norm	7.203	10.922	5.25	4.90063	-0.34937	0		1.45926	-0.104032	4
0000015_66.tif	predator	norm	7.328	10.866	5.25	4.7726	-0.477391	0		1.42114	-0.142153	4
0000015_66.tif	predator	norm	7.3	10.964	5.25	4.80669	-0.443309	0		1.43129	-0.132004	4
0000015_66.tif	predator	norm	8.064	11.429	5.25	4.11139	-1.13861	0		1.22425	-0.339044	4
0000015_66.tif	predator	norm	7.752	11.998	5.25	4.55693	-0.693061	0		1.35692	-0.206373	4
0000015_66.tif	predator	norm	7.62	12.783	5.25	4.97161	-0.278386	0		1.4804	-0.082895	4
0000015_66.tif	predator	norm	7.76	12.698	5.25	4.80858	-0.441415	0		1.43185	-0.13144	4
0000015_66.tif	predator	norm	8.217	12.832	5.25	4.46612	-0.783877	0		1.32988	-0.233415	4
0000015_66.tif	predator	norm	8.488	12.672	5.25	4.15144	-1.09855	0		1.23618	-0.327116	4
0000015_66.tif	predator	norm	7.766	13.234	5.25	5.05873	-0.191266	0		1.50634	-0.0569533	4
0000015_66.tif	predator	norm	8.439	14.318	5.25	5.203	-0.0469931	0		1.5493	-0.0139931	4
0000015_66.tif	predator	norm	8.766	14.422	5.25	5.05656	-0.193432	0		1.50569	-0.0575983	4
0000015_66.tif	predator	norm	9.717	14.137	5.25	4.24907	-1.00092	0		1.26525	-0.298045	4
0000015_66.tif	predator	norm	9.245	13.762	5.25	4.24505	-1.00495	0		1.26405	-0.299244	4
0000015_66.tif	predator	norm	9.87	15.141	5.25	5.0429	-0.207094	0		1.50162	-0.0616665	4
0000015_66.tif	predator	norm	10.568	15.286	5.25	4.91395	-0.336044	0		1.46323	-0.100064	4
0000015_66.tif	predator	norm	10.854	14.651	5.25	4.22219	-1.0278	0		1.25724	-0.306049	4
0000015_66.tif	predator	norm	11.703	14.406	5.25	3.81111	-1.43889	0		1.13483	-0.428457	4
0000015_66.tif	predator	norm	12.443	14.615	5.25	4.0152	-1.2348	0		1.1956	-0.367686	4
0000015_66.tif	predator	norm	12.302	15.516	5.25	4.90541	-0.344584	0		1.46068	-0.102607	4
0000015_66.tif	predator	norm	12.76	15.234	5.25	4.66677	-0.583228	0		1.38962	-0.173668	4
0000015_66.tif	predator	norm	13.083	15.458	5.25	4.94295	-0.307044	0		1.47186	-0.0914285	4
0000015_66.tif	predator	norm	13.651	14.531	5.25	4.21418	-1.03582	0		1.25486	-0.308435	4
0000015_66.tif	predator	norm	11.349	11.958	5.25	1.5358	-3.7142	0		0.457314	-1.10598	4
0000015_66.tif	predator	norm	13.531	11.75	5.25	1.83117	-3.41882	0		0.545268	-1.01802	4
0000015_66.tif	predator	norm	12.641	11.021	5.25	0.681208	-4.56879	0		0.202843	-1.36045	4
0000015_66.tif	predator	norm	12.521	10.604	5.25	0.427142	-4.82285	0		0.12719	-1.4361	4
0000015_66.tif	predator	norm	13.047	9.807	5.25	1.24943	-4.00057	0		0.372042	-1.19125	4
0000015_66.tif	predator	norm	13.312	9.323	5.25	1.77561	-3.47439	0		0.528723	-1.03457	4
0000015_66.tif	predator	norm	11.521	9	5.25	1.71364	-3.53636	0		0.51027	-1.05302	4
0000015_66.tif	predator	norm	11.484	8.401	5.25	2.2965	-2.9535	0		0.683828	-0.879463	4
0000015_66.tif	predator	norm	10.042	8	5.25	3.32399	-1.926	0		0.989785	-0.573506	4
0000015_66.tif	predator	norm	10.182	8.583	5.25	2.79012	-2.45988	0		0.830814	-0.732477	4
0000015_66.tif	predator	norm	11.167	6.37	5.25	4.34504	-0.904958	0		1.29382	-0.269469	4
0000015_66.tif	predator	norm	12.995	5.875	5.25	4.82487	-0.425122	0		1.4367	-0.126589	4
0000015_66.tif	predator	norm	13.203	5.745	5.25	4.99468	-0.25532	0		1.48726	-0.0760267	4
0000015_66.tif	predator	norm	13.724	6.385	5.25	4.53319	-0.716807	0		1.34985	-0.213444	4
0000015_66.tif	predator	norm	13.979	6.062	5.25	4.92778	-0.322214	0		1.46735	-0.0959456	4
0000015_66.tif	predator	norm	15.13	7.969	5.25	4.02723	-1.22276	0		1.19919	-0.364102	4
0000015_66.tif	predator	norm	16.047	7.885	5.25	4.80407	-0.445923	0		1.43051	-0.132783	4
0000015_66.tif	predator	norm	16.464	8.422	5.25	4.88939	-0.360604	0		1.45591	-0.107377	4
0000015_66.tif	predator	norm	16.526	8.344	5.25	4.97997	-0.270029	0		1.48288	-0.0804066	4
0000015_66.tif	predator	norm	16.922	9.703	5.25	4.91338	-0.336613	0		1.46306	-0.100233	4
0000015_66.tif	predator	norm	16.88	9.781	5.25	4.85812	-0.391873	0		1.4466	-0.116688	4
0000015_66.tif	predator	norm	14.49	9.802	5.25	2.53017	-2.71982	0		0.75341	-0.809881	4
0000015_66.tif	predator	norm	14.708	11.521	5.25	2.76656	-2.48344	0		0.823797	-0.739494	4
0000015_66.tif	predator	norm	15.214	12.729	5.25	3.76874	-1.48126	0		1.12222	-0.441074	4
0000015_66.tif	predator	norm	15.427	14.198	5.25	4.89354	-0.356451	0		1.45715	-0.10614	4
0000015_66.tif	predator	norm	15.292	14.25	5.25	4.84153	-0.408464	0		1.44166	-0.121628	4
0000015_66.tif	predator	norm	14.568	14.891	5.25	4.94013	-0.309869	0		1.47102	-0.0922696	4
0000015_66.tif	predator	norm	14.703	14.974	5.25	5.08013	-0.169861	0		1.51271	-0.0505797	4
0000015_66.tif	predator	norm	12.214	17.828	5.25	7.214	1.964	1		2.14811	0.584821	4
00000160_4.tif	control	norm	11.323	10.719	4.89045	3.30733	-1.58312	0		0.984825	-0.471405	1
00000160_4.tif	control	norm	11.359	10.637	4.89045	3.27119	-1.61927	0		0.974061	-0.482169	1
00000160_4.tif	control	norm	11.72	9.811	4.89045	3.0347	-1.85575	0		0.903643	-0.552587	1
00000160_4.tif	control	norm	12.075	8.248	4.89045	3.5219	-1.36855	0		1.04872	-0.407513	1
00000160_4.tif	control	norm	14.693	8.068	4.89045	2.60476	-2.28569	0		0.77562	-0.68061	1
00000160_4.tif	control	norm	14.936	10.095	4.89045	0.653119	-4.23733	0		0.194479	-1.26175	1
00000160_4.tif	control	norm	15.033	10.186	4.89045	0.631352	-4.2591	0		0.187998	-1.26823	1
00000160_4.tif	control	norm	13.568	10.526	4.89045	1.07199	-3.81846	0		0.319206	-1.13702	1
00000160_4.tif	control	norm	13.651	10.443	4.89045	1.00543	-3.88503	0		0.299386	-1.15684	1
00000160_4.tif	control	norm	14.97	12.137	4.89045	1.50394	-3.38652	0		0.447827	-1.0084	1
00000160_4.tif	control	norm	15.089	12.241	4.89045	1.63476	-3.25569	0		0.486783	-0.969448	1
00000160_4.tif	control	norm	14.755	12.283	4.89045	1.61584	-3.27461	0		0.481149	-0.975081	1
00000160_4.tif	control	norm	14.533	12.359	4.89045	1.68979	-3.20067	0		0.503168	-0.953063	1
00000160_4.tif	control	norm	14.651	12.582	4.89045	1.91012	-2.98034	0		0.568775	-0.887455	1
00000160_4.tif	control	norm	15.568	7.958	4.89045	2.87152	-2.01893	0		0.855053	-0.601177	1
00000160_4.tif	control	norm	16.312	9.458	4.89045	2.07435	-2.81611	0		0.617679	-0.838552	1
00000160_4.tif	control	norm	16.641	9.917	4.89045	2.14806	-2.7424	0		0.639627	-0.816603	1
00000160_4.tif	control	norm	17.047	10.292	4.89045	2.44669	-2.44376	0		0.728551	-0.72768	1
00000160_4.tif	control	norm	16.297	10.672	4.89045	1.667	-3.22345	0		0.496383	-0.959848	1
00000160_4.tif	control	norm	16.068	11.068	4.89045	1.49153	-3.39892	0		0.444133	-1.0121	1
00000160_4.tif	control	norm	16.276	10.979	4.89045	1.67438	-3.21607	0		0.498582	-0.957649	1
00000160_4.tif	control	norm	16.609	11.323	4.89045	2.08332	-2.80713	0		0.620352	-0.835879	1
00000160_4.tif	control	norm	15.531	11.495	4.89045	1.2203	-3.67015	0		0.363368	-1.09286	1
00000160_4.tif	control	norm	16.859	11.745	4.89045	2.47382	-2.41664	0		0.736628	-0.719602	1
00000160_4.tif	control	norm	16.599	12.438	4.89045	2.64494	-2.24551	0		0.787584	-0.668646	1
00000160_4.tif	control	norm	14.703	12.964	4.89045	2.29316	-2.59729	0		0.682835	-0.773395	1
00000160_4.tif	control	norm	14.74	13.047	4.89045	2.37755	-2.51291	0		0.707962	-0.748268	1
0000017_56.tif	predator	norm	7.448	18.521	5.09904	9.63601	4.53697	1		2.86931	1.35097	2
0000017_56.tif	predator	norm	8.089	18.818	5.09904	9.48299	4.38395	1		2.82375	1.30541	2
0000017_56.tif	predator	norm	9.908	17.71	5.09904	7.57489	2.47586	1		2.25558	0.737236	2
0000017_56.tif	predator	norm	8.922	17.439	5.09904	7.87703	2.77799	1		2.34554	0.827203	2
0000017_56.tif	predator	norm	9.63	16.057	5.09904	6.34809	1.24906	1		1.89027	0.371931	2
0000017_56.tif	predator	norm	10.005	15.502	5.09904	5.68038	0.581345	1		1.69145	0.173107	2
0000017_56.tif	predator	norm	11.852	15.29	5.09904	4.54814	-0.550895	0		1.3543	-0.16404	2
0000017_56.tif	predator	norm	10.97	15.3	5.09904	4.95731	-0.141731	0		1.47614	-0.0422034	2
0000017_56.tif	predator	norm	10.512	14.898	5.09904	4.89199	-0.207051	0		1.45669	-0.0616536	2
0000017_56.tif	predator	norm	9.339	9.575	5.09904	4.48815	-0.610892	0		1.33644	-0.181905	2
0000017_56.tif	predator	norm	9.276	9.436	5.09904	4.59537	-0.503668	0		1.36836	-0.149977	2
0000017_56.tif	predator	norm	9.623	9.193	5.09904	4.37221	-0.726825	0		1.30191	-0.216427	2
0000017_56.tif	predator	norm	10.79	8.648	5.09904	3.69082	-1.40821	0		1.09902	-0.419324	2
0000017_56.tif	predator	norm	10.332	8.113	5.09904	4.38895	-0.710084	0		1.3069	-0.211442	2
0000017_56.tif	predator	norm	11.373	8.036	5.09904	3.75124	-1.3478	0		1.11701	-0.401334	2
0000017_56.tif	predator	norm	13.345	6.835	5.09904	4.24886	-0.850182	0		1.26518	-0.253159	2
0000017_56.tif	predator	norm	14.589	7.314	5.09904	3.90002	-1.19902	0		1.16131	-0.357032	2
0000017_56.tif	predator	norm	14.679	7.349	5.09904	3.89098	-1.20805	0		1.15862	-0.359722	2
0000017_56.tif	predator	norm	18.085	16.703	5.09904	7.21415	2.11511	1		2.14816	0.629816	2
0000017_56.tif	predator	norm	15.439	10.026	5.09904	2.14647	-2.95257	0		0.639155	-0.879185	2
0000017_56.tif	predator	norm	14.946	9.769	5.09904	1.90062	-3.19842	0		0.565948	-0.952392	2
0000017_56.tif	predator	norm	17.689	8.589	5.09904	4.81433	-0.284709	0		1.43356	-0.0847778	2
0000017_56.tif	predator	norm	15.453	7.217	5.09904	4.29657	-0.802464	0		1.27939	-0.23895	2
0000017_56.tif	predator	norm	16.432	7.453	5.09904	4.61986	-0.479176	0		1.37566	-0.142684	2
0000017_56.tif	predator	norm	16.467	7.099	5.09904	4.92307	-0.175966	0		1.46594	-0.0523973	2
0000017_56.tif	predator	norm	15.425	2.547	5.09904	8.73077	3.63174	1		2.59976	1.08142	2
0000017_56.tif	predator	norm	15.328	2.387	5.09904	8.86742	3.76838	1		2.64045	1.12211	2
0000019_16.tif	control	norm	9.562	13.151	5.06261	4.5249	-0.537711	0		1.34738	-0.160114	1
0000019_16.tif	control	norm	9.771	11.495	5.06261	3.5983	-1.4643	0		1.07147	-0.436026	1
0000019_16.tif	control	norm	10.344	11.552	5.06261	3.07082	-1.99179	0		0.914398	-0.593095	1
0000019_16.tif	control	norm	9.042	10.198	5.06261	4.19788	-0.86473	0		1.25	-0.257491	1
0000019_16.tif	control	norm	11.448	11.688	5.06261	2.14087	-2.92174	0		0.637486	-0.870007	1
0000019_16.tif	control	norm	12	12.5	5.06261	2.34743	-2.71517	0		0.698995	-0.808498	1
0000019_16.tif	control	norm	12.464	11.359	5.06261	1.15026	-3.91234	0		0.342514	-1.16498	1
0000019_16.tif	control	norm	12.562	11.333	5.06261	1.06714	-3.99547	0		0.317761	-1.18973	1
0000019_16.tif	control	norm	15.089	12.62	5.06261	2.82028	-2.24232	0		0.839796	-0.667697	1
0000019_16.tif	control	norm	15.151	12.568	5.06261	2.82324	-2.23936	0		0.840677	-0.666815	1
0000019_16.tif	control	norm	16.396	12.76	5.06261	3.89069	-1.17191	0		1.15853	-0.348961	1
0000019_16.tif	control	norm	16.24	12.542	5.06261	3.63812	-1.42449	0		1.08332	-0.424171	1
0000019_16.tif	control	norm	15.964	12.109	5.06261	3.17319	-1.88942	0		0.944879	-0.562613	1
0000019_16.tif	control	norm	17.057	10.49	5.06261	3.82801	-1.23459	0		1.13987	-0.367625	1
0000019_16.tif	control	norm	15.964	9.62	5.06261	2.87309	-2.18952	0		0.855519	-0.651974	1
0000019_16.tif	control	norm	15.245	8.99	5.06261	2.5188	-2.54381	0		0.750023	-0.757469	1
0000019_16.tif	control	norm	15.505	9.917	5.06261	2.34948	-2.71313	0		0.699605	-0.807887	1
000002_132.tif	predator	norm	7.406	4.073	5.30218	10.9183	5.61609	1		3.25113	1.6723	4
000002_132.tif	predator	norm	7.609	4.033	5.30218	10.8077	5.5055	1		3.2182	1.63937	4
000002_132.tif	predator	norm	5.29	10.589	5.30218	9.78246	4.48028	1		2.91292	1.33409	4
000002_132.tif	predator	norm	9.776	19.359	5.30218	9.06325	3.76107	1		2.69876	1.11993	4
000002_132.tif	predator	norm	11.297	19.679	5.30218	8.57206	3.26988	1		2.5525	0.973672	4
000002_132.tif	predator	norm	9.95	18.269	5.30218	8.08532	2.78314	1		2.40757	0.828735	4
000002_132.tif	predator	norm	12.214	17.252	5.30218	5.99031	0.688129	1		1.78373	0.204904	4
000002_132.tif	predator	norm	12.339	17.28	5.30218	5.95874	0.656557	1		1.77433	0.195503	4
000002_132.tif	predator	norm	13.332	16.627	5.30218	4.96984	-0.332339	0		1.47987	-0.0989607	4
000002_132.tif	predator	norm	13.505	16.509	5.30218	4.80278	-0.499399	0		1.43012	-0.148706	4
000002_132.tif	predator	norm	11.429	14.526	5.30218	4.3932	-0.908977	0		1.30816	-0.270666	4
000002_132.tif	predator	norm	11.2	14.457	5.30218	4.54161	-0.760574	0		1.35235	-0.226476	4
000002_132.tif	predator	norm	10.915	14.227	5.30218	4.66429	-0.63789	0		1.38889	-0.189944	4
000002_132.tif	predator	norm	13.443	14.707	5.30218	3.16649	-2.13569	0		0.942886	-0.635945	4
000002_132.tif	predator	norm	13.575	14.748	5.30218	3.14123	-2.16095	0		0.935364	-0.643467	4
000002_132.tif	predator	norm	13.561	14.616	5.30218	3.03025	-2.27193	0		0.902317	-0.676513	4
000002_132.tif	predator	norm	12.373	13.387	5.30218	2.98175	-2.32043	0		0.887876	-0.690955	4
000002_132.tif	predator	norm	12.13	13.457	5.30218	3.22865	-2.07353	0		0.961394	-0.617436	4
000002_132.tif	predator	norm	13.457	12.491	5.30218	1.61935	-3.68283	0		0.482194	-1.09664	4
000002_132.tif	predator	norm	10.089	11.734	5.30218	4.89425	-0.407928	0		1.45736	-0.121469	4
000002_132.tif	predator	norm	10.061	11.498	5.30218	4.93764	-0.364538	0		1.47028	-0.108548	4
000002_132.tif	predator	norm	10.137	11.422	5.30218	4.86942	-0.432765	0		1.44997	-0.128864	4
000002_132.tif	predator	norm	10.318	10.595	5.30218	4.85063	-0.451556	0		1.44437	-0.13446	4
000002_132.tif	predator	norm	11.116	10.811	5.30218	4.02404	-1.27814	0		1.19824	-0.380592	4
000002_132.tif	predator	norm	11.491	10.908	5.30218	3.6369	-1.66528	0		1.08296	-0.495871	4
000002_132.tif	predator	norm	12.033	11.054	5.30218	3.07577	-2.22641	0		0.915873	-0.662958	4
000002_132.tif	predator	norm	13.533	11.464	5.30218	1.52171	-3.78047	0		0.453119	-1.12571	4
000002_132.tif	predator	norm	10.484	9.679	5.30218	5.03072	-0.271465	0		1.498	-0.0808342	4
000002_132.tif	predator	norm	12.276	9.234	5.30218	3.82333	-1.47886	0		1.13847	-0.440359	4
000002_132.tif	predator	norm	12.783	8.144	5.30218	4.3837	-0.918479	0		1.30534	-0.273495	4
000002_132.tif	predator	norm	13.123	7.582	5.30218	4.73492	-0.567261	0		1.40992	-0.168913	4
000002_132.tif	predator	norm	12.957	7.526	5.30218	4.85327	-0.448912	0		1.44516	-0.133672	4
000002_132.tif	predator	norm	12.227	7.561	5.30218	5.17026	-0.131917	0		1.53955	-0.039281	4
000002_132.tif	predator	norm	12.526	7.297	5.30218	5.24939	-0.0527921	0		1.56311	-0.0157199	4
000002_132.tif	predator	norm	13.484	7.373	5.30218	4.80357	-0.498615	0		1.43036	-0.148473	4
000002_132.tif	predator	norm	13.165	7.255	5.30218	5.02206	-0.280122	0		1.49542	-0.0834118	4
000002_132.tif	predator	norm	13.477	6.873	5.30218	5.28301	-0.0191683	0		1.57312	-0.00570774	4
000002_132.tif	predator	norm	14.043	7.036	5.30218	4.99056	-0.31162	0		1.48604	-0.0927912	4
000002_132.tif	predator	norm	13.967	7.3	5.30218	4.74712	-0.555057	0		1.41355	-0.165279	4
000002_132.tif	predator	norm	16.127	7.182	5.30218	4.89259	-0.409591	0		1.45687	-0.121964	4
000002_132.tif	predator	norm	16.314	7.175	5.30218	4.94655	-0.355628	0		1.47294	-0.105895	4
000002_132.tif	predator	norm	17.009	8.04	5.30218	4.39492	-0.907264	0		1.30867	-0.270156	4
000002_132.tif	predator	norm	17.023	8.234	5.30218	4.23055	-1.07163	0		1.25973	-0.3191	4
000002_132.tif	predator	norm	18.057	8.172	5.30218	4.86383	-0.438352	0		1.4483	-0.130528	4
000002_132.tif	predator	norm	17.46	9.859	5.30218	3.23691	-2.06527	0		0.963855	-0.614975	4
000002_132.tif	predator	norm	16.696	10.359	5.30218	2.33267	-2.96952	0		0.694598	-0.884233	4
000002_132.tif	predator	norm	17.314	11.061	5.30218	2.49426	-2.80792	0		0.742717	-0.836114	4
000002_132.tif	predator	norm	14.175	12.679	5.30218	1.09339	-4.20879	0		0.325578	-1.25325	4
000002_132.tif	predator	norm	13.995	14.675	5.30218	2.90851	-2.39367	0		0.866067	-0.712764	4
000002_132.tif	predator	norm	14.606	16.45	5.30218	4.52739	-0.77479	0		1.34812	-0.230709	4
000002_132.tif	predator	norm	15.349	15.72	5.30218	3.80006	-1.50213	0		1.13154	-0.447288	4
000002_132.tif	predator	norm	15.988	16.818	5.30218	4.98322	-0.318962	0		1.48385	-0.0949772	4
000002_132.tif	predator	norm	16.134	16.839	5.30218	5.03526	-0.266923	0		1.49935	-0.0794817	4
000002_132.tif	predator	norm	15.182	18.023	5.30218	6.08839	0.786204	1		1.81294	0.234108	4
000002_132.tif	predator	norm	15.064	18.127	5.30218	6.18958	0.887402	1		1.84307	0.264242	4
000002_132.tif	predator	norm	19.547	17.078	5.30218	6.8765	1.57432	1		2.04761	0.468784	4
000002_132.tif	predator	norm	19.2	13.064	5.30218	4.36861	-0.933576	0		1.30084	-0.277991	4
000002_132.tif	predator	norm	19.512	11.405	5.30218	4.56423	-0.737953	0		1.35909	-0.21974	4
000002_132.tif	predator	norm	18.637	8.651	5.30218	4.91786	-0.384323	0		1.46439	-0.11444	4
000002_132.tif	predator	norm	18.769	8.783	5.30218	4.93134	-0.37084	0		1.46841	-0.110425	4
000002_132.tif	predator	norm	18.991	9.068	5.30218	4.93285	-0.369328	0		1.46886	-0.109975	4
000002_132.tif	predator	norm	19.116	9.158	5.30218	4.98429	-0.317889	0		1.48417	-0.0946579	4
000002_132.tif	predator	norm	20.214	8.276	5.30218	6.3887	1.08652	1		1.90236	0.323532	4
000002_132.tif	predator	norm	21.401	9.359	5.30218	6.9205	1.61832	1		2.06072	0.481887	4
000002_132.tif	predator	norm	21.943	4.38	5.30218	10.2772	4.97501	1		3.06024	1.48141	4
0000022_44.tif	control	norm	9.844	12.688	5.06261	4.64354	-0.419067	0		1.38271	-0.124786	3
0000022_44.tif	control	norm	9.995	12.45	5.06261	4.4408	-0.621803	0		1.32234	-0.185154	3
0000022_44.tif	control	norm	11.092	13.082	5.06261	3.60649	-1.45611	0		1.07391	-0.433587	3
0000022_44.tif	control	norm	13.786	15.436	5.06261	3.97383	-1.08878	0		1.18329	-0.324206	3
0000022_44.tif	control	norm	13.849	14.873	5.06261	3.40755	-1.65506	0		1.01467	-0.492827	3
0000022_44.tif	control	norm	13.745	14.852	5.06261	3.40318	-1.65943	0		1.01337	-0.494127	3
0000022_44.tif	control	norm	14.175	14.464	5.06261	2.96821	-2.0944	0		0.883843	-0.623649	3
0000022_44.tif	control	norm	14.543	14.714	5.06261	3.22085	-1.84175	0		0.959073	-0.548419	3
0000022_44.tif	control	norm	14.571	14.602	5.06261	3.11112	-1.95149	0		0.926397	-0.581095	3
0000022_44.tif	control	norm	14.578	14.505	5.06261	3.01497	-2.04764	0		0.897768	-0.609725	3
0000022_44.tif	control	norm	10.509	10.873	5.06261	3.87506	-1.18755	0		1.15388	-0.353615	3
0000022_44.tif	control	norm	14.71	11.547	5.06261	0.379918	-4.68269	0		0.113128	-1.39436	3
0000022_44.tif	control	norm	13.675	10.505	5.06261	1.19289	-3.86972	0		0.355207	-1.15229	3
0000022_44.tif	control	norm	13.03	9.436	5.06261	2.44088	-2.62173	0		0.726821	-0.780671	3
0000022_44.tif	control	norm	11.335	9.026	5.06261	3.88699	-1.17562	0		1.15743	-0.350064	3
0000022_44.tif	control	norm	11.231	9.033	5.06261	3.96339	-1.09921	0		1.18018	-0.327313	3
0000022_44.tif	control	norm	12.536	8.012	5.06261	3.92369	-1.13892	0		1.16836	-0.339135	3
0000022_44.tif	control	norm	14.141	7.88	5.06261	3.62509	-1.43752	0		1.07944	-0.42805	3
0000022_44.tif	control	norm	14.481	7.727	5.06261	3.7759	-1.28671	0		1.12435	-0.383142	3
0000022_44.tif	control	norm	14.995	7.769	5.06261	3.78927	-1.27333	0		1.12833	-0.37916	3
0000022_44.tif	control	norm	15.092	8.345	5.06261	3.24501	-1.81759	0		0.966267	-0.541225	3
0000022_44.tif	control	norm	15.196	7.72	5.06261	3.87726	-1.18534	0		1.15453	-0.35296	3
0000022_44.tif	control	norm	15.259	7.811	5.06261	3.80345	-1.25916	0		1.13255	-0.374941	3
0000022_44.tif	control	norm	15.634	7.825	5.06261	3.89849	-1.16412	0		1.16085	-0.346639	3
0000022_44.tif	control	norm	15.814	7.97	5.06261	3.82809	-1.23452	0		1.13989	-0.367603	3
0000022_44.tif	control	norm	16.988	7.505	5.06261	4.79677	-0.265832	0		1.42834	-0.0791569	3
0000022_44.tif	control	norm	17.196	7.575	5.06261	4.85823	-0.204378	0		1.44664	-0.0608576	3
0000022_44.tif	control	norm	17.286	7.714	5.06261	4.80146	-0.261149	0		1.42973	-0.0777623	3
0000022_44.tif	control	norm	15.606	10.568	5.06261	1.5777	-3.4849	0		0.469793	-1.0377	3
0000022_44.tif	control	norm	17.106	10.234	5.06261	3.04832	-2.01428	0		0.9077	-0.599793	3
0000022_44.tif	control	norm	18.085	11.241	5.06261	3.76093	-1.30168	0		1.11989	-0.387601	3
0000022_44.tif	control	norm	18.363	11.262	5.06261	4.03702	-1.02559	0		1.2021	-0.305389	3
0000022_44.tif	control	norm	17.773	12.79	5.06261	3.67392	-1.38869	0		1.09398	-0.413509	3
0000022_44.tif	control	norm	17.71	12.707	5.06261	3.58622	-1.47639	0		1.06787	-0.439624	3
0000022_44.tif	control	norm	17.023	11.929	5.06261	2.72399	-2.33861	0		0.811124	-0.696369	3
0000022_44.tif	control	norm	16.856	11.748	5.06261	2.53516	-2.52745	0		0.754894	-0.752598	3
0000022_44.tif	control	norm	17.196	11.63	5.06261	2.86595	-2.19666	0		0.853394	-0.654099	3
0000022_44.tif	control	norm	17.335	11.297	5.06261	3.00886	-2.05375	0		0.895947	-0.611546	3
0000022_44.tif	control	norm	16.391	11.776	5.06261	2.07642	-2.98618	0		0.618297	-0.889196	3
0000022_44.tif	control	norm	16.467	11.873	5.06261	2.16635	-2.89625	0		0.645075	-0.862418	3
0000022_44.tif	control	norm	15.641	12.318	5.06261	1.54272	-3.51989	0		0.459376	-1.04812	3
0000022_44.tif	control	norm	16.12	12.616	5.06261	2.10685	-2.95576	0		0.627357	-0.880135	3
0000022_44.tif	control	norm	16.168	12.54	5.06261	2.10922	-2.95338	0		0.628064	-0.879429	3
0000022_44.tif	control	norm	16.231	12.762	5.06261	2.27926	-2.78334	0		0.678697	-0.828796	3
0000022_44.tif	control	norm	15.766	12.665	5.06261	1.84681	-3.2158	0		0.549925	-0.957567	3
0000022_44.tif	control	norm	15.939	13.245	5.06261	2.37155	-2.69105	0		0.706177	-0.801315	3
0000022_44.tif	control	norm	15.655	13.325	5.06261	2.25351	-2.8091	0		0.671028	-0.836465	3
0000022_44.tif	control	norm	15.273	13.595	5.06261	2.29622	-2.76639	0		0.683745	-0.823747	3
0000022_44.tif	control	norm	15.134	14.019	5.06261	2.64329	-2.41932	0		0.787091	-0.720401	3
0000022_44.tif	control	norm	16.745	13.304	5.06261	3.012	-2.0506	0		0.896884	-0.610609	3
0000022_44.tif	control	norm	16.613	14.047	5.06261	3.41842	-1.64419	0		1.0179	-0.489589	3
0000022_44.tif	control	norm	16.245	14.335	5.06261	3.4195	-1.64311	0		1.01822	-0.489269	3
0000025_26.tif	control	norm	7.865	10.979	5.10948	4.76182	-0.347659	0		1.41793	-0.103522	2
0000025_26.tif	control	norm	7.748	10.821	5.10948	4.86105	-0.248438	0		1.44747	-0.0739774	2
0000025_26.tif	control	norm	7.845	10.627	5.10948	4.75043	-0.359058	0		1.41453	-0.106917	2
0000025_26.tif	control	norm	8.977	11.578	5.10948	3.80549	-1.30399	0		1.13316	-0.38829	2
0000025_26.tif	control	norm	8.894	11.828	5.10948	3.96859	-1.14089	0		1.18173	-0.339723	2
0000025_26.tif	control	norm	9.151	12.113	5.10948	3.85008	-1.2594	0		1.14644	-0.375012	2
0000025_26.tif	control	norm	9.123	12.175	5.10948	3.90323	-1.20626	0		1.16226	-0.359187	2
0000025_26.tif	control	norm	9.325	12.273	5.10948	3.77321	-1.33627	0		1.12355	-0.397901	2
0000025_26.tif	control	norm	9.623	11.932	5.10948	3.34752	-1.76197	0		0.99679	-0.524661	2
0000025_26.tif	control	norm	9.964	13.036	5.10948	3.7343	-1.37519	0		1.11196	-0.40949	2
0000025_26.tif	control	norm	9.547	12.863	5.10948	3.92671	-1.18277	0		1.16926	-0.352194	2
0000025_26.tif	control	norm	11.866	12.877	5.10948	2.59956	-2.50992	0		0.774072	-0.747378	2
0000025_26.tif	control	norm	12.214	11.71	5.10948	1.38186	-3.72763	0		0.411475	-1.10998	2
0000025_26.tif	control	norm	12.45	10.335	5.10948	0.146103	-4.96338	0		0.043505	-1.47795	2
0000025_26.tif	control	norm	11.186	10.155	5.10948	1.42093	-3.68856	0		0.423109	-1.09834	2
0000025_26.tif	control	norm	12.457	8.842	5.10948	1.54365	-3.56583	0		0.459654	-1.0618	2
0000025_26.tif	control	norm	10.033	9.168	5.10948	2.82879	-2.28069	0		0.84233	-0.679121	2
0000025_26.tif	control	norm	9.894	7.523	5.10948	3.92753	-1.18196	0		1.1695	-0.351951	2
0000025_26.tif	control	norm	10.082	7.731	5.10948	3.64722	-1.46226	0		1.08603	-0.435417	2
0000025_26.tif	control	norm	11.026	8.224	5.10948	2.66295	-2.44653	0		0.792947	-0.728504	2
0000025_26.tif	control	norm	12.255	8.224	5.10948	2.18172	-2.92777	0		0.64965	-0.871801	2
0000025_26.tif	control	norm	12.568	7.557	5.10948	2.82308	-2.28641	0		0.840628	-0.680823	2
0000025_26.tif	control	norm	11.415	7.078	5.10948	3.50449	-1.60499	0		1.04353	-0.477918	2
0000025_26.tif	control	norm	11.429	6.918	5.10948	3.65117	-1.45831	0		1.08721	-0.434242	2
0000025_26.tif	control	norm	13.179	7.175	5.10948	3.25885	-1.85063	0		0.970389	-0.551062	2
0000025_26.tif	control	norm	13.682	7.172	5.10948	3.38909	-1.7204	0		1.00917	-0.512282	2
0000025_26.tif	control	norm	13.655	7.283	5.10948	3.27533	-1.83416	0		0.975294	-0.546157	2
0000025_26.tif	control	norm	14.064	8.443	5.10948	2.43467	-2.67482	0		0.72497	-0.796481	2
0000025_26.tif	control	norm	14.981	8.47	5.10948	3.06101	-2.04848	0		0.911476	-0.609975	2
0000025_26.tif	control	norm	16.036	8.589	5.10948	3.88452	-1.22496	0		1.15669	-0.364758	2
0000025_26.tif	control	norm	15.509	8.894	5.10948	3.27637	-1.83311	0		0.975604	-0.545846	2
0000025_26.tif	control	norm	14.536	13.863	5.10948	3.99025	-1.11923	0		1.18818	-0.333274	2
0000025_26.tif	control	norm	12.606	14.474	5.10948	4.09404	-1.01545	0		1.21908	-0.30237	2
0000025_26.tif	control	norm	12.717	14.481	5.10948	4.103	-1.00649	0		1.22175	-0.299701	2
0000025_26.tif	control	norm	11.016	14.203	5.10948	4.13396	-0.97552	0		1.23097	-0.29048	2
0000025_60.tif	predator	norm	4.156	8.271	5.16691	10.8335	5.66659	1		3.22589	1.68734	2
0000025_60.tif	predator	norm	4.325	8.179	5.16691	10.7081	5.54117	1		3.18854	1.64999	2
0000025_60.tif	predator	norm	5.026	15.03	5.16691	9.75489	4.58798	1		2.90471	1.36616	2
0000025_60.tif	predator	norm	10.849	12.672	5.16691	3.51984	-1.64707	0		1.0481	-0.490449	2
0000025_60.tif	predator	norm	10.335	12.755	5.16691	4.04041	-1.1265	0		1.20311	-0.335439	2
0000025_60.tif	predator	norm	9.425	11.936	5.16691	4.88815	-0.278761	0		1.45554	-0.0830068	2
0000025_60.tif	predator	norm	10.724	10.821	5.16691	3.79006	-1.37685	0		1.12857	-0.409984	2
0000025_60.tif	predator	norm	10.821	9.599	5.16691	4.26091	-0.906004	0		1.26877	-0.269781	2
0000025_60.tif	predator	norm	9.96	9.349	5.16691	5.11783	-0.0490839	0		1.52394	-0.0146157	2
0000025_60.tif	predator	norm	10.141	9.016	5.16691	5.15305	-0.0138616	0		1.53442	-0.00412758	2
0000025_60.tif	predator	norm	10.62	8.988	5.16691	4.79143	-0.375483	0		1.42674	-0.111808	2
0000025_60.tif	predator	norm	11.286	8.967	5.16691	4.3142	-0.852713	0		1.28464	-0.253912	2
0000025_60.tif	predator	norm	11.502	8.335	5.16691	4.65166	-0.51525	0		1.38513	-0.153426	2
0000025_60.tif	predator	norm	10.161	8.363	5.16691	5.5467	0.379786	1		1.65164	0.113089	2
0000025_60.tif	predator	norm	15.523	7.352	5.16691	4.84382	-0.323088	0		1.44235	-0.0962059	2
0000025_60.tif	predator	norm	13.939	13.05	5.16691	1.0748	-4.09211	0		0.320043	-1.21851	2
0000025_60.tif	predator	norm	13.071	13.168	5.16691	1.6757	-3.49121	0		0.498972	-1.03958	2
0000025_60.tif	predator	norm	12.55	14.675	5.16691	3.16818	-1.99874	0		0.943387	-0.595164	2
0000025_60.tif	predator	norm	12.668	14.543	5.16691	2.99295	-2.17396	0		0.89121	-0.647341	2
0000025_60.tif	predator	norm	14.175	15.28	5.16691	3.2409	-1.92601	0		0.965042	-0.573509	2
0000025_60.tif	predator	norm	14.189	15.148	5.16691	3.10843	-2.05848	0		0.925599	-0.612953	2
0000025_60.tif	predator	norm	14.328	15.252	5.16691	3.21004	-1.95687	0		0.955854	-0.582697	2
0000025_60.tif	predator	norm	14.634	15.016	5.16691	2.99138	-2.17553	0		0.890744	-0.647808	2
0000025_60.tif	predator	norm	17.109	17.655	5.16691	6.27128	1.10437	1		1.8674	0.328849	2
0000025_60.tif	predator	norm	17.158	17.509	5.16691	6.16342	0.996514	1		1.83528	0.296732	2
0000025_60.tif	predator	norm	17.533	16.113	5.16691	5.19113	0.024224	1		1.54576	0.00721319	2
0000025_60.tif	predator	norm	17.339	16.078	5.16691	5.045	-0.121911	0		1.50225	-0.0363014	2
0000025_60.tif	predator	norm	16.311	15.297	5.16691	3.81982	-1.34709	0		1.13743	-0.401123	2
0000025_60.tif	predator	norm	18.637	11.227	5.16691	4.40112	-0.765792	0		1.31052	-0.22803	2
0000025_60.tif	predator	norm	16.082	10.286	5.16691	2.49328	-2.67363	0		0.742423	-0.796128	2
0000025_60.tif	predator	norm	16.866	9.425	5.16691	3.65672	-1.51019	0		1.08886	-0.449689	2
0000025_60.tif	predator	norm	18.241	9.731	5.16691	4.55826	-0.608648	0		1.35731	-0.181237	2
0000025_60.tif	predator	norm	16.811	7.925	5.16691	4.81609	-0.350824	0		1.43409	-0.104465	2
0000025_60.tif	predator	norm	16.672	7.856	5.16691	4.80543	-0.361477	0		1.43091	-0.107637	2
0000025_60.tif	predator	norm	16.255	7.62	5.16691	4.83004	-0.336866	0		1.43824	-0.100309	2
0000025_60.tif	predator	norm	17.484	6.53	5.16691	6.35954	1.19263	1		1.89368	0.355129	2
0000025_60.tif	predator	norm	19.019	6.995	5.16691	6.90131	1.7344	1		2.055	0.516452	2
0000025_60.tif	predator	norm	17.356	2.273	5.16691	10.2323	5.06536	1		3.04686	1.50831	2
0000026_79.tif	control	norm	13.995	7.064	5.32294	4.74925	-0.573692	0		1.41418	-0.170828	5
0000026_79.tif	control	norm	14.099	7.002	5.32294	4.81	-0.51294	0		1.43227	-0.152738	5
0000026_79.tif	control	norm	12.571	7.863	5.32294	4.23612	-1.08683	0		1.26139	-0.323624	5
0000026_79.tif	control	norm	11.988	7.071	5.32294	5.19178	-0.131167	0		1.54596	-0.0390575	5
0000026_79.tif	control	norm	11.391	7.613	5.32294	4.9992	-0.323746	0		1.48861	-0.0964017	5
0000026_79.tif	control	norm	11.245	7.62	5.32294	5.07413	-0.248818	0		1.51092	-0.0740904	5
0000026_79.tif	control	norm	13.297	7.667	5.32294	4.22283	-1.10011	0		1.25743	-0.327581	5
0000026_79.tif	control	norm	11.135	8.292	5.32294	4.60493	-0.718015	0		1.37121	-0.213803	5
0000026_79.tif	control	norm	11.38	9.276	5.32294	3.72176	-1.60119	0		1.10823	-0.476785	5
0000026_79.tif	control	norm	10.891	9.823	5.32294	3.77882	-1.54412	0		1.12522	-0.459793	5
0000026_79.tif	control	norm	11.552	9.776	5.32294	3.26466	-2.05828	0		0.972118	-0.612895	5
0000026_79.tif	control	norm	11.646	9.807	5.32294	3.17203	-2.15091	0		0.944536	-0.640477	5
0000026_79.tif	control	norm	12.974	8.578	5.32294	3.42573	-1.89721	0		1.02008	-0.564932	5
0000026_79.tif	control	norm	13.422	8.698	5.32294	3.18781	-2.13513	0		0.949234	-0.635779	5
0000026_79.tif	control	norm	13.359	9.74	5.32294	2.20186	-3.12108	0		0.655649	-0.929363	5
0000026_79.tif	control	norm	13.359	9.802	5.32294	2.14362	-3.17932	0		0.638307	-0.946706	5
0000026_79.tif	control	norm	9.573	10.411	5.32294	4.74265	-0.580289	0		1.41222	-0.172793	5
0000026_79.tif	control	norm	9.583	10.484	5.32294	4.71201	-0.610934	0		1.40309	-0.181918	5
0000026_79.tif	control	norm	10.224	10.76	5.32294	4.02009	-1.30286	0		1.19706	-0.387951	5
0000026_79.tif	control	norm	10.318	10.719	5.32294	3.94061	-1.38233	0		1.1734	-0.411616	5
0000026_79.tif	control	norm	10.438	10.26	5.32294	3.98099	-1.34196	0		1.18542	-0.399594	5
0000026_79.tif	control	norm	11.698	10.63	5.32294	2.68066	-2.64228	0		0.798221	-0.786791	5
0000026_79.tif	control	norm	13.057	10.161	5.32294	1.955	-3.36795	0		0.582139	-1.00287	5
0000026_79.tif	control	norm	10.729	11.297	5.32294	3.41407	-1.90888	0		1.01661	-0.568406	5
0000026_79.tif	control	norm	12.599	11.589	5.32294	1.52143	-3.80151	0		0.453037	-1.13198	5
0000026_79.tif	control	norm	12.677	11.646	5.32294	1.43662	-3.88632	0		0.427783	-1.15723	5
0000026_79.tif	control	norm	12.151	12.083	5.32294	1.97171	-3.35123	0		0.587117	-0.997896	5
0000026_79.tif	control	norm	10.943	12.464	5.32294	3.22754	-2.0954	0		0.961065	-0.623948	5
0000026_79.tif	control	norm	10.979	12.578	5.32294	3.21751	-2.10543	0		0.958078	-0.626934	5
0000026_79.tif	control	norm	13.958	12.536	5.32294	0.738574	-4.58437	0		0.219925	-1.36509	5
0000026_79.tif	control	norm	14.01	12.802	5.32294	0.994453	-4.32849	0		0.296118	-1.28889	5
0000026_79.tif	control	norm	13.943	12.849	5.32294	1.04942	-4.27352	0		0.312487	-1.27253	5
0000026_79.tif	control	norm	13.031	13.609	5.32294	2.09297	-3.22997	0		0.623225	-0.961788	5
0000026_79.tif	control	norm	12.599	13.688	5.32294	2.40508	-2.91786	0		0.71616	-0.868852	5
0000026_79.tif	control	norm	12.568	13.99	5.32294	2.66514	-2.6578	0		0.793599	-0.791413	5
0000026_79.tif	control	norm	12.182	13.911	5.32294	2.84603	-2.47691	0		0.847462	-0.73755	5
0000026_79.tif	control	norm	11.365	13.365	5.32294	3.14864	-2.1743	0		0.93757	-0.647442	5
0000026_79.tif	control	norm	9.88	14.172	5.32294	4.83857	-0.484371	0		1.44078	-0.144231	5
0000026_79.tif	control	norm	12.224	14.99	5.32294	3.69244	-1.63051	0		1.0995	-0.485516	5
0000026_79.tif	control	norm	12.677	14.943	5.32294	3.44086	-1.88209	0		1.02458	-0.560429	5
0000026_79.tif	control	norm	12.203	15.812	5.32294	4.42875	-0.894195	0		1.31875	-0.266265	5
0000026_79.tif	control	norm	12.802	15.469	5.32294	3.88186	-1.44108	0		1.1559	-0.429111	5
0000026_79.tif	control	norm	13.594	15.719	5.32294	3.94015	-1.3828	0		1.17326	-0.411755	5
0000026_79.tif	control	norm	13.865	15.406	5.32294	3.60194	-1.721	0		1.07255	-0.512464	5
0000026_79.tif	control	norm	13.802	15.349	5.32294	3.54987	-1.77307	0		1.05704	-0.527968	5
0000026_79.tif	control	norm	13.682	16.339	5.32294	4.54663	-0.776316	0		1.35385	-0.231164	5
0000026_79.tif	control	norm	13.896	15.703	5.32294	3.89656	-1.42639	0		1.16028	-0.424735	5
0000026_79.tif	control	norm	14.078	15.453	5.32294	3.64109	-1.68185	0		1.08421	-0.500804	5
0000026_79.tif	control	norm	14.359	15.396	5.32294	3.59306	-1.72988	0		1.06991	-0.515107	5
0000026_79.tif	control	norm	14.661	15.807	5.32294	4.03364	-1.2893	0		1.2011	-0.383915	5
0000026_79.tif	control	norm	15.104	15.625	5.32294	3.94195	-1.38099	0		1.17379	-0.411218	5
0000026_79.tif	control	norm	15.453	16.203	5.32294	4.59355	-0.729395	0		1.36782	-0.217192	5
0000026_79.tif	control	norm	14.87	14.964	5.32294	3.24374	-2.0792	0		0.965889	-0.619124	5
0000026_79.tif	control	norm	14.948	14.932	5.32294	3.23214	-2.0908	0		0.962435	-0.622578	5
0000026_79.tif	control	norm	16.099	15.802	5.32294	4.46096	-0.861987	0		1.32834	-0.256674	5
0000026_79.tif	control	norm	16.49	15.292	5.32294	4.21941	-1.10354	0		1.25641	-0.3286	5
0000026_79.tif	control	norm	16.589	15.297	5.32294	4.28024	-1.0427	0		1.27453	-0.310486	5
0000026_79.tif	control	norm	16.443	15.552	5.32294	4.41118	-0.911761	0		1.31352	-0.271495	5
0000026_79.tif	control	norm	17.375	14.641	5.32294	4.32466	-0.998283	0		1.28775	-0.297259	5
0000026_79.tif	control	norm	17.448	14.615	5.32294	4.36339	-0.959556	0		1.29929	-0.285727	5
0000026_79.tif	control	norm	17.776	14.333	5.32294	4.4541	-0.868841	0		1.3263	-0.258715	5
0000026_79.tif	control	norm	18.266	13.958	5.32294	4.68269	-0.640255	0		1.39436	-0.190649	5
0000026_79.tif	control	norm	16.745	14.318	5.32294	3.64073	-1.68221	0		1.0841	-0.500912	5
0000026_79.tif	control	norm	15.964	14.214	5.32294	3.03796	-2.28498	0		0.904613	-0.680399	5
0000026_79.tif	control	norm	15.24	13.922	5.32294	2.39637	-2.92657	0		0.713568	-0.871445	5
0000026_79.tif	control	norm	14.479	13.656	5.32294	1.88174	-3.4412	0		0.560327	-1.02469	5
0000026_79.tif	control	norm	15.026	13.38	5.32294	1.81899	-3.50396	0		0.541639	-1.04337	5
0000026_79.tif	control	norm	15.057	12.943	5.32294	1.47898	-3.84397	0		0.440395	-1.14462	5
0000026_79.tif	control	norm	15.964	12.823	5.32294	2.11701	-3.20594	0		0.630381	-0.954631	5
0000026_79.tif	control	norm	16.745	12.635	5.32294	2.76626	-2.55668	0		0.82371	-0.761303	5
0000026_79.tif	control	norm	16.219	12.203	5.32294	2.15084	-3.1721	0		0.640455	-0.944557	5
0000026_79.tif	control	norm	17.859	13.271	5.32294	4.02849	-1.29446	0		1.19956	-0.38545	5
0000026_79.tif	control	norm	18.333	13.438	5.32294	4.53082	-0.792124	0		1.34914	-0.235871	5
0000026_79.tif	control	norm	18.438	13.365	5.32294	4.60384	-0.7191	0		1.37089	-0.214126	5
0000026_79.tif	control	norm	14.349	11.51	5.32294	0.388882	-4.93406	0		0.115797	-1.46922	5
0000026_79.tif	control	norm	14.484	11.406	5.32294	0.55609	-4.76685	0		0.165587	-1.41943	5
0000026_79.tif	control	norm	14.505	10.875	5.32294	1.0192	-4.30374	0		0.303487	-1.28153	5
0000026_79.tif	control	norm	16.182	11.562	5.32294	2.09298	-3.22996	0		0.623228	-0.961785	5
0000026_79.tif	control	norm	16.552	11.625	5.32294	2.45513	-2.86781	0		0.731065	-0.853948	5
0000026_79.tif	control	norm	16.589	11.219	5.32294	2.55477	-2.76817	0		0.760735	-0.824277	5
0000026_79.tif	control	norm	18.036	9.583	5.32294	4.51985	-0.80309	0		1.34588	-0.239136	5
0000026_79.tif	control	norm	17.641	9.083	5.32294	4.46742	-0.855526	0		1.33026	-0.25475	5
0000026_79.tif	control	norm	16.917	8.339	5.32294	4.46931	-0.853636	0		1.33083	-0.254187	5
0000026_79.tif	control	norm	16.875	8.219	5.32294	4.53741	-0.785533	0		1.3511	-0.233908	5
0000026_79.tif	control	norm	17.042	8.104	5.32294	4.73087	-0.592075	0		1.40871	-0.176302	5
0000026_79.tif	control	norm	15.542	8.292	5.32294	3.8024	-1.52054	0		1.13224	-0.452772	5
0000026_79.tif	control	norm	14.406	8.125	5.32294	3.69935	-1.62359	0		1.10155	-0.483458	5
0000026_79.tif	control	norm	15.958	7.615	5.32294	4.58826	-0.734683	0		1.36625	-0.218767	5
0000026_79.tif	control	norm	18.292	10.432	5.32294	4.40951	-0.913437	0		1.31302	-0.271994	5
0000026_79.tif	control	norm	18.609	10.396	5.32294	4.7223	-0.600646	0		1.40616	-0.178854	5
0000026_79.tif	control	norm	18.62	10.547	5.32294	4.68983	-0.633115	0		1.39649	-0.188523	5
0000026_79.tif	control	norm	18.781	10.849	5.32294	4.77511	-0.54783	0		1.42189	-0.163127	5
0000026_79.tif	control	norm	18.573	13.047	5.32294	4.63651	-0.686437	0		1.38061	-0.2044	5
0000027_48.tif	control	norm	10.62	13.646	4.91146	4.02153	-0.889936	0		1.19749	-0.264996	2
0000027_48.tif	control	norm	12.391	13.448	4.91146	2.47134	-2.44012	0		0.735891	-0.726595	2
0000027_48.tif	control	norm	12.354	13.781	4.91146	2.7407	-2.17076	0		0.816099	-0.646387	2
0000027_48.tif	control	norm	13.266	14.391	4.91146	2.82683	-2.08463	0		0.841745	-0.620741	2
0000027_48.tif	control	norm	13.823	14.339	4.91146	2.65511	-2.25635	0		0.790613	-0.671874	2
0000027_48.tif	control	norm	13.891	13.292	4.91146	1.60855	-3.30292	0		0.478977	-0.98351	2
0000027_48.tif	control	norm	12.812	12.042	4.91146	1.37155	-3.53991	0		0.408408	-1.05408	2
0000027_48.tif	control	norm	12.542	11.891	4.91146	1.61001	-3.30145	0		0.479414	-0.983073	2
0000027_48.tif	control	norm	10.578	11.526	4.91146	3.56739	-1.34407	0		1.06226	-0.400224	2
0000027_48.tif	control	norm	10.661	11.484	4.91146	3.48688	-1.42458	0		1.03829	-0.424197	2
0000027_48.tif	control	norm	12.573	10.958	4.91146	1.73599	-3.17548	0		0.516925	-0.945562	2
0000027_48.tif	control	norm	12.542	10.661	4.91146	1.90855	-3.00291	0		0.568309	-0.894178	2
0000027_48.tif	control	norm	13.885	10.135	4.91146	1.58876	-3.3227	0		0.473085	-0.989401	2
0000027_48.tif	control	norm	10.969	9.969	4.91146	3.61502	-1.29645	0		1.07644	-0.386043	2
0000027_48.tif	control	norm	11.641	9.76	4.91146	3.16627	-1.7452	0		0.942819	-0.519667	2
0000027_48.tif	control	norm	11.156	8.901	4.91146	4.09407	-0.817392	0		1.21909	-0.243395	2
0000027_48.tif	control	norm	11.37	8.922	4.91146	3.92586	-0.985601	0		1.169	-0.293482	2
0000027_48.tif	control	norm	12.13	8.318	4.91146	3.9373	-0.974162	0		1.17241	-0.290076	2
0000027_48.tif	control	norm	12.229	8.297	4.91146	3.90597	-1.0055	0		1.16308	-0.299407	2
0000027_48.tif	control	norm	13.443	9.203	4.91146	2.59561	-2.31585	0		0.772896	-0.689591	2
0000027_48.tif	control	norm	13.812	7.208	4.91146	4.50702	-0.40444	0		1.34206	-0.12043	2
0000027_48.tif	control	norm	14.688	7.094	4.91146	4.64135	-0.270118	0		1.38205	-0.0804331	2
0000027_48.tif	control	norm	14.161	7.833	4.91146	3.87005	-1.04141	0		1.15239	-0.310101	2
0000027_48.tif	control	norm	15.151	8.458	4.91146	3.39855	-1.51292	0		1.01199	-0.450501	2
0000027_48.tif	control	norm	15.021	8.599	4.91146	3.22633	-1.68513	0		0.960705	-0.501782	2
0000027_48.tif	control	norm	15.104	8.932	4.91146	2.93357	-1.9779	0		0.873528	-0.588959	2
0000027_48.tif	control	norm	14.354	9.208	4.91146	2.50408	-2.40739	0		0.745639	-0.716848	2
0000027_48.tif	control	norm	15.76	8.734	4.91146	3.38173	-1.52973	0		1.00698	-0.455508	2
0000027_48.tif	control	norm	14.865	10.068	4.91146	1.78813	-3.12334	0		0.532451	-0.930036	2
0000027_48.tif	control	norm	16.271	10.172	4.91146	2.62314	-2.28832	0		0.781092	-0.681394	2
0000027_48.tif	control	norm	15.797	11.021	4.91146	1.79094	-3.12053	0		0.533288	-0.929199	2
0000027_48.tif	control	norm	15.833	11.172	4.91146	1.77337	-3.1381	0		0.528055	-0.934432	2
0000027_48.tif	control	norm	15.792	11.417	4.91146	1.67559	-3.23588	0		0.49894	-0.963547	2
0000027_48.tif	control	norm	16.286	11.417	4.91146	2.16398	-2.74748	0		0.644369	-0.818118	2
0000027_48.tif	control	norm	15.198	11.771	4.91146	1.05919	-3.85228	0		0.315394	-1.14709	2
0000027_48.tif	control	norm	15.875	13.271	4.91146	2.33782	-2.57365	0		0.696131	-0.766355	2
0000027_48.tif	control	norm	15.974	13.234	4.91146	2.38827	-2.52319	0		0.711156	-0.75133	2
0000027_48.tif	control	norm	16.115	13.839	4.91146	2.90847	-2.003	0		0.866054	-0.596433	2
0000027_48.tif	control	norm	14.964	14.245	4.91146	2.67191	-2.23956	0		0.795614	-0.666873	2
0000027_48.tif	control	norm	15.042	14.26	4.91146	2.7111	-2.20037	0		0.807284	-0.655203	2
0000027_48.tif	control	norm	14.927	15.943	4.91146	4.31224	-0.599226	0		1.28406	-0.178432	2
0000027_48.tif	control	norm	14.974	15.875	4.91146	4.25435	-0.657116	0		1.26682	-0.19567	2
0000027_48.tif	control	norm	17.771	14.651	4.91146	4.67628	-0.235183	0		1.39246	-0.0700304	2
0000027_48.tif	control	norm	17.88	14.557	4.91146	4.70377	-0.207696	0		1.40064	-0.0618455	2
0000027_48.tif	control	norm	18.286	13.115	4.91146	4.3789	-0.532564	0		1.30391	-0.158581	2
0000027_48.tif	control	norm	18.286	13.021	4.91146	4.3495	-0.561964	0		1.29515	-0.167336	2
0000027_48.tif	control	norm	18.594	12.469	4.91146	4.5184	-0.393061	0		1.34544	-0.117042	2
0000027_48.tif	control	norm	16.531	10.385	4.91146	2.72933	-2.18214	0		0.812712	-0.649775	2
0000030_25.tif	control	norm	10.328	12.615	5.19796	4.3403	-0.857659	0		1.29241	-0.255385	2
0000030_25.tif	control	norm	10.214	12.229	5.19796	4.3232	-0.874758	0		1.28732	-0.260477	2
0000030_25.tif	control	norm	10	11.568	5.19796	4.39914	-0.798819	0		1.30993	-0.237864	2
0000030_25.tif	control	norm	10.458	11.021	5.19796	3.907	-1.29096	0		1.16339	-0.384409	2
0000030_25.tif	control	norm	10.229	10.589	5.19796	4.1585	-1.03946	0		1.23828	-0.30952	2
0000030_25.tif	control	norm	11.13	11.276	5.19796	3.24503	-1.95292	0		0.966274	-0.581522	2
0000030_25.tif	control	norm	11.198	13.021	5.19796	3.74565	-1.45231	0		1.11534	-0.432454	2
0000030_25.tif	control	norm	11.62	12.271	5.19796	3.01621	-2.18175	0		0.898137	-0.649659	2
0000030_25.tif	control	norm	12.031	11.672	5.19796	2.42309	-2.77487	0		0.721523	-0.826273	2
0000030_25.tif	control	norm	12.656	11.583	5.19796	1.79903	-3.39892	0		0.535698	-1.0121	2
0000030_25.tif	control	norm	13.094	11.776	5.19796	1.47833	-3.71963	0		0.440203	-1.10759	2
0000030_25.tif	control	norm	12.896	12.38	5.19796	2.00121	-3.19675	0		0.5959	-0.951896	2
0000030_25.tif	control	norm	13.516	12.958	5.19796	2.11489	-3.08307	0		0.629752	-0.918045	2
0000030_25.tif	control	norm	13.526	10.828	5.19796	0.860912	-4.33705	0		0.256354	-1.29144	2
0000030_25.tif	control	norm	12.427	10.99	5.19796	1.93825	-3.25971	0		0.577152	-0.970644	2
0000030_25.tif	control	norm	12.953	9.604	5.19796	2.00041	-3.19755	0		0.595662	-0.952135	2
0000030_25.tif	control	norm	12.417	8.854	5.19796	2.91386	-2.2841	0		0.867661	-0.680136	2
0000030_25.tif	control	norm	12.526	8.823	5.19796	2.86586	-2.3321	0		0.853366	-0.694431	2
0000030_25.tif	control	norm	12.885	8.531	5.19796	2.89664	-2.30132	0		0.862531	-0.685265	2
0000030_25.tif	control	norm	13.385	8.109	5.19796	3.07248	-2.12548	0		0.914893	-0.632903	2
0000030_25.tif	control	norm	14.307	8.031	5.19796	2.99056	-2.2074	0		0.8905	-0.657297	2
0000030_25.tif	control	norm	14.354	7.964	5.19796	3.05702	-2.14094	0		0.910289	-0.637508	2
0000030_25.tif	control	norm	14.49	9.062	5.19796	1.96298	-3.23498	0		0.584518	-0.963279	2
0000030_25.tif	control	norm	15.703	7.974	5.19796	3.32783	-1.87013	0		0.990928	-0.556868	2
0000030_25.tif	control	norm	16.344	7.542	5.19796	4.00248	-1.19547	0		1.19182	-0.355977	2
0000030_25.tif	control	norm	16.323	7.417	5.19796	4.10153	-1.09643	0		1.22131	-0.326483	2
0000030_25.tif	control	norm	16.682	7.974	5.19796	3.82788	-1.37007	0		1.13983	-0.407967	2
0000030_25.tif	control	norm	16.094	8.969	5.19796	2.68331	-2.51465	0		0.799009	-0.748788	2
0000030_25.tif	control	norm	16.88	8.964	5.19796	3.24907	-1.94889	0		0.967476	-0.58032	2
0000030_25.tif	control	norm	16.927	8.896	5.19796	3.32858	-1.86938	0		0.991152	-0.556644	2
0000030_25.tif	control	norm	13.682	10.693	5.19796	0.757676	-4.44028	0		0.225613	-1.32218	2
0000030_25.tif	control	norm	14.156	13.115	5.19796	2.1044	-3.09356	0		0.626628	-0.921168	2
0000030_25.tif	control	norm	14.125	13.562	5.19796	2.55231	-2.64565	0		0.760001	-0.787795	2
0000030_25.tif	control	norm	14.255	13.615	5.19796	2.59633	-2.60163	0		0.77311	-0.774687	2
0000030_25.tif	control	norm	17.932	13.927	5.19796	4.6009	-0.597054	0		1.37001	-0.177785	2
0000030_25.tif	control	norm	17.719	13.224	5.19796	4.0128	-1.18516	0		1.19489	-0.352906	2
0000030_25.tif	control	norm	17.328	14.552	5.19796	4.60948	-0.588477	0		1.37257	-0.175231	2
0000030_25.tif	control	norm	16.318	14.854	5.19796	4.30187	-0.896088	0		1.28097	-0.266828	2
0000030_25.tif	control	norm	17.417	12.682	5.19796	3.47471	-1.72325	0		1.03467	-0.513131	2
0000030_25.tif	control	norm	18.036	11.99	5.19796	3.79674	-1.40122	0		1.13055	-0.417242	2
0000030_25.tif	control	norm	19.089	9.958	5.19796	4.84212	-0.355837	0		1.44184	-0.105958	2
0000030_25.tif	control	norm	19.042	12	5.19796	4.77836	-0.419594	0		1.42285	-0.124943	2
0000030_25.tif	control	norm	18.984	12.12	5.19796	4.74794	-0.450016	0		1.41379	-0.134001	2
0000030_82.tif	predator	norm	9.917	7.062	5.125	4.72374	-0.401267	0		1.40659	-0.119485	5
0000030_82.tif	predator	norm	10.177	6.88	5.125	4.68745	-0.437552	0		1.39578	-0.13029	5
0000030_82.tif	predator	norm	9.901	7.464	5.125	4.45235	-0.672652	0		1.32578	-0.200296	5
0000030_82.tif	predator	norm	10.875	7.448	5.125	3.80881	-1.31619	0		1.13415	-0.391923	5
0000030_82.tif	predator	norm	10.474	7.891	5.125	3.7426	-1.3824	0		1.11443	-0.411638	5
0000030_82.tif	predator	norm	10.5	7.99	5.125	3.65553	-1.46947	0		1.08851	-0.437565	5
0000030_82.tif	predator	norm	9.198	8.448	5.125	4.46349	-0.661515	0		1.32909	-0.196979	5
0000030_82.tif	predator	norm	8.505	9.078	5.125	4.87114	-0.253865	0		1.45048	-0.0755934	5
0000030_82.tif	predator	norm	8.854	8.964	5.125	4.575	-0.550001	0		1.3623	-0.163774	5
0000030_82.tif	predator	norm	9.292	9	5.125	4.15159	-0.97341	0		1.23622	-0.289852	5
0000030_82.tif	predator	norm	8.62	10.125	5.125	4.56163	-0.563377	0		1.35832	-0.167757	5
0000030_82.tif	predator	norm	8.615	10.276	5.125	4.55703	-0.567976	0		1.35695	-0.169126	5
0000030_82.tif	predator	norm	8.719	10.448	5.125	4.4482	-0.676805	0		1.32454	-0.201532	5
0000030_82.tif	predator	norm	11.224	10.547	5.125	1.94384	-3.18117	0		0.578816	-0.947256	5
0000030_82.tif	predator	norm	11.693	10.089	5.125	1.52757	-3.59743	0		0.454865	-1.07121	5
0000030_82.tif	predator	norm	11.776	10.156	5.125	1.43054	-3.69447	0		0.425971	-1.1001	5
0000030_82.tif	predator	norm	11.135	9.562	5.125	2.23388	-2.89113	0		0.665182	-0.860891	5
0000030_82.tif	predator	norm	11.807	9.016	5.125	2.00556	-3.11944	0		0.597196	-0.928876	5
0000030_82.tif	predator	norm	8.411	10.88	5.125	4.77196	-0.35304	0		1.42095	-0.105125	5
0000030_82.tif	predator	norm	8.828	11.344	5.125	4.42224	-0.70276	0		1.31681	-0.209261	5
0000030_82.tif	predator	norm	8.729	12.297	5.125	4.79177	-0.33323	0		1.42685	-0.0992258	5
0000030_82.tif	predator	norm	8.891	12.438	5.125	4.69882	-0.426186	0		1.39917	-0.126906	5
0000030_82.tif	predator	norm	9.76	11.521	5.125	3.55958	-1.56542	0		1.05994	-0.466136	5
0000030_82.tif	predator	norm	9.891	11.271	5.125	3.36781	-1.75719	0		1.00283	-0.52324	5
0000030_82.tif	predator	norm	10.276	10.922	5.125	2.9231	-2.2019	0		0.870411	-0.655661	5
0000030_82.tif	predator	norm	11.177	14.125	5.125	4.14407	-0.980932	0		1.23398	-0.292092	5
0000030_82.tif	predator	norm	11.734	15.464	5.125	5.17631	0.0513048	1		1.54135	0.015277	5
0000030_82.tif	predator	norm	12.562	15.115	5.125	4.6644	-0.460601	0		1.38892	-0.137153	5
0000030_82.tif	predator	norm	13.505	14.562	5.125	4.086	-1.039	0		1.21669	-0.309383	5
0000030_82.tif	predator	norm	13.953	15.917	5.125	5.48362	0.35862	1		1.63286	0.106786	5
0000030_82.tif	predator	norm	14.484	15.115	5.125	4.80886	-0.316145	0		1.43193	-0.0941386	5
0000030_82.tif	predator	norm	15.344	14.818	5.125	4.84468	-0.280324	0		1.4426	-0.0834722	5
0000030_82.tif	predator	norm	15.422	14.703	5.125	4.77853	-0.346469	0		1.4229	-0.103168	5
0000030_82.tif	predator	norm	15.781	14.578	5.125	4.85229	-0.272711	0		1.44487	-0.0812052	5
0000030_82.tif	predator	norm	14.823	13.724	5.125	3.63333	-1.49167	0		1.0819	-0.444175	5
0000030_82.tif	predator	norm	14.203	13.714	5.125	3.38637	-1.73864	0		1.00836	-0.517714	5
0000030_82.tif	predator	norm	12.661	13.401	5.125	2.95465	-2.17035	0		0.879806	-0.646266	5
0000030_82.tif	predator	norm	12.443	13.552	5.125	3.14643	-1.97857	0		0.936912	-0.58916	5
0000030_82.tif	predator	norm	15.979	14.536	5.125	4.92722	-0.197787	0		1.46718	-0.058895	5
0000030_82.tif	predator	norm	16.375	13.406	5.125	4.33524	-0.789762	0		1.2909	-0.235167	5
0000030_82.tif	predator	norm	16.484	13.385	5.125	4.40267	-0.722332	0		1.31098	-0.215089	5
0000030_82.tif	predator	norm	16.073	12.672	5.125	3.634	-1.491	0		1.0821	-0.443976	5
0000030_82.tif	predator	norm	17.245	13.76	5.125	5.22714	0.102136	1		1.55649	0.030413	5
0000030_82.tif	predator	norm	17.219	12.948	5.125	4.73925	-0.385756	0		1.41121	-0.114866	5
0000030_82.tif	predator	norm	17.229	12.797	5.125	4.67141	-0.453591	0		1.39101	-0.135066	5
0000030_82.tif	predator	norm	17.547	12.24	5.125	4.71666	-0.408341	0		1.40448	-0.121592	5
0000030_82.tif	predator	norm	17.818	11.63	5.125	4.78867	-0.336329	0		1.42592	-0.100149	5
0000030_82.tif	predator	norm	17.714	10.042	5.125	4.56902	-0.555987	0		1.36052	-0.165556	5
0000030_82.tif	predator	norm	17.745	9.859	5.125	4.62128	-0.503722	0		1.37608	-0.149993	5
0000030_82.tif	predator	norm	17.807	9.542	5.125	4.73585	-0.38915	0		1.41019	-0.115877	5
0000030_82.tif	predator	norm	17.974	9.458	5.125	4.91653	-0.208473	0		1.464	-0.0620769	5
0000030_82.tif	predator	norm	17.938	9.229	5.125	4.93483	-0.190172	0		1.46944	-0.0566274	5
0000030_82.tif	predator	norm	17.354	8.922	5.125	4.47097	-0.654031	0		1.33132	-0.194751	5
0000030_82.tif	predator	norm	16.609	8.917	5.125	3.7844	-1.3406	0		1.12688	-0.399191	5
0000030_82.tif	predator	norm	14.901	9.115	5.125	2.213	-2.912	0		0.658966	-0.867106	5
0000030_82.tif	predator	norm	15.729	7.906	5.125	3.6388	-1.4862	0		1.08353	-0.442545	5
0000030_82.tif	predator	norm	15.573	7.87	5.125	3.55714	-1.56786	0		1.05921	-0.466863	5
0000030_82.tif	predator	norm	13.943	8.245	5.125	2.37533	-2.74967	0		0.707303	-0.81877	5
0000030_82.tif	predator	norm	15.318	7.781	5.125	3.45912	-1.66589	0		1.03002	-0.496051	5
0000030_82.tif	predator	norm	15.875	7.599	5.125	3.9612	-1.1638	0		1.17953	-0.346544	5
0000030_82.tif	predator	norm	15.849	7.365	5.125	4.1181	-1.0069	0		1.22625	-0.299826	5
0000030_82.tif	predator	norm	15.932	7.125	5.125	4.35528	-0.769725	0		1.29687	-0.229201	5
0000030_82.tif	predator	norm	16.396	7.625	5.125	4.31679	-0.808214	0		1.28541	-0.240662	5
0000030_82.tif	predator	norm	16.818	7.505	5.125	4.71593	-0.40907	0		1.40426	-0.121809	5
0000030_82.tif	predator	norm	17.552	6.443	5.125	5.96711	0.842109	1		1.77683	0.250755	5
0000030_82.tif	predator	norm	14.443	6.938	5.125	3.77424	-1.35076	0		1.12386	-0.402217	5
0000030_82.tif	predator	norm	14.25	6.792	5.125	3.85332	-1.27168	0		1.1474	-0.378668	5
0000030_82.tif	predator	norm	12.49	7.208	5.125	3.3511	-1.77391	0		0.997856	-0.528216	5
0000030_82.tif	predator	norm	12.474	7.505	5.125	3.06439	-2.06062	0		0.912483	-0.613589	5
0000030_82.tif	predator	norm	13.568	8.297	5.125	2.22936	-2.89564	0		0.663837	-0.862235	5
0000030_82.tif	predator	norm	13.391	9.651	5.125	0.868388	-4.25662	0		0.25858	-1.26749	5
0000030_82.tif	predator	norm	19.078	5.134	5.125	7.97663	2.85163	1		2.3752	0.849129	5
0000033_11.tif	predator	norm	9	11.604	5.02617	4.6993	-0.32687	0		1.39931	-0.097332	1
0000033_11.tif	predator	norm	9.005	11.752	5.02617	4.67546	-0.35071	0		1.39221	-0.104431	1
0000033_11.tif	predator	norm	9.283	13.092	5.02617	4.44357	-0.5826	0		1.32316	-0.173481	1
0000033_11.tif	predator	norm	11.387	13.752	5.02617	2.70264	-2.32352	0		0.804766	-0.691876	1
0000033_11.tif	predator	norm	9.679	14.036	5.02617	4.34447	-0.6817	0		1.29365	-0.20299	1
0000033_11.tif	predator	norm	11.255	9.328	5.02617	3.79888	-1.22728	0		1.13119	-0.365448	1
0000033_11.tif	predator	norm	12.033	9.37	5.02617	3.32607	-1.70009	0		0.990405	-0.506237	1
0000033_11.tif	predator	norm	12.491	9.745	5.02617	2.78416	-2.242	0		0.82904	-0.667601	1
0000033_11.tif	predator	norm	12.748	9.439	5.02617	2.97724	-2.04892	0		0.886534	-0.610108	1
0000033_11.tif	predator	norm	12.7	9.342	5.02617	3.08428	-1.94189	0		0.918405	-0.578237	1
0000033_11.tif	predator	norm	16.231	9.703	5.02617	3.64372	-1.38244	0		1.08499	-0.41165	1
0000033_11.tif	predator	norm	17.411	9.738	5.02617	4.53641	-0.489753	0		1.35081	-0.145834	1
0000033_11.tif	predator	norm	17.377	11.099	5.02617	3.90748	-1.11869	0		1.16353	-0.333111	1
0000033_11.tif	predator	norm	17.682	11.425	5.02617	4.11985	-0.906316	0		1.22677	-0.269874	1
0000033_11.tif	predator	norm	17.738	11.55	5.02617	4.15098	-0.875185	0		1.23604	-0.260604	1
0000033_11.tif	predator	norm	14.627	12.057	5.02617	1.00027	-4.0259	0		0.29785	-1.19879	1
0000033_43.tif	control	norm	10.646	8.26	5.23445	4.25739	-0.977059	0		1.26772	-0.290939	3
0000033_43.tif	control	norm	9.62	8.47	5.23445	4.5733	-0.661152	0		1.36179	-0.196871	3
0000033_43.tif	control	norm	8.946	9.234	5.23445	4.45473	-0.779725	0		1.32648	-0.232179	3
0000033_43.tif	control	norm	9.085	9.894	5.23445	3.93292	-1.30153	0		1.17111	-0.387556	3
0000033_43.tif	control	norm	9.3	10.415	5.23445	3.46668	-1.76777	0		1.03227	-0.52639	3
0000033_43.tif	control	norm	8.668	11.075	5.23445	3.77725	-1.45721	0		1.12475	-0.433912	3
0000033_43.tif	control	norm	7.682	11.033	5.23445	4.73819	-0.496262	0		1.41089	-0.147772	3
0000033_43.tif	control	norm	7.675	10.929	5.23445	4.77147	-0.462984	0		1.4208	-0.137863	3
0000033_43.tif	control	norm	8.286	12.109	5.23445	3.99088	-1.24357	0		1.18837	-0.370297	3
0000033_43.tif	control	norm	9.016	11.998	5.23445	3.26583	-1.96862	0		0.972465	-0.586197	3
0000033_43.tif	control	norm	7.453	13.012	5.23445	4.89204	-0.342408	0		1.4567	-0.101959	3
0000033_43.tif	control	norm	12.057	11.866	5.23445	0.393561	-4.84089	0		0.117191	-1.44147	3
0000033_43.tif	control	norm	12.141	11.776	5.23445	0.438308	-4.79614	0		0.130515	-1.42815	3
0000033_43.tif	control	norm	12.613	10.193	5.23445	2.02819	-3.20626	0		0.603935	-0.954727	3
0000033_43.tif	control	norm	12.724	9.693	5.23445	2.53982	-2.69463	0		0.756283	-0.802379	3
0000033_43.tif	control	norm	11.793	7.429	5.23445	4.78842	-0.446029	0		1.42585	-0.132814	3
0000033_43.tif	control	norm	12.377	7.616	5.23445	4.57811	-0.656337	0		1.36323	-0.195437	3
0000033_43.tif	control	norm	12.8	7.769	5.23445	4.45492	-0.779527	0		1.32654	-0.23212	3
0000033_43.tif	control	norm	8.106	14.089	5.23445	4.5808	-0.653652	0		1.36402	-0.194638	3
0000033_43.tif	control	norm	9.3	14.797	5.23445	3.95441	-1.28004	0		1.17751	-0.381157	3
0000033_43.tif	control	norm	9.675	14.109	5.23445	3.23052	-2.00393	0		0.961952	-0.596711	3
0000033_43.tif	control	norm	9.731	14.04	5.23445	3.14459	-2.08986	0		0.936364	-0.622299	3
0000033_43.tif	control	norm	9.182	13.984	5.23445	3.57498	-1.65947	0		1.06452	-0.494139	3
0000033_43.tif	control	norm	10.55	14.158	5.23445	2.6154	-2.61905	0		0.778787	-0.779876	3
0000033_43.tif	control	norm	12.036	14.165	5.23445	1.98655	-3.2479	0		0.591535	-0.967127	3
0000033_43.tif	control	norm	12.057	15.332	5.23445	3.14663	-2.08782	0		0.936972	-0.62169	3
0000033_43.tif	control	norm	12.141	15.283	5.23445	3.09295	-2.1415	0		0.920987	-0.637675	3
0000033_43.tif	control	norm	10.856	15.262	5.23445	3.38159	-1.85286	0		1.00694	-0.551726	3
0000033_43.tif	control	norm	10.12	15.595	5.23445	4.02765	-1.2068	0		1.19931	-0.35935	3
0000033_43.tif	control	norm	10.092	15.72	5.23445	4.14844	-1.08601	0		1.23528	-0.32338	3
0000033_43.tif	control	norm	9.884	15.13	5.23445	3.78783	-1.44662	0		1.1279	-0.430761	3
0000033_43.tif	control	norm	13.488	16.752	5.23445	4.71735	-0.517098	0		1.40469	-0.153976	3
0000033_43.tif	control	norm	13.064	15.175	5.23445	3.08436	-2.15009	0		0.918429	-0.640233	3
0000033_43.tif	control	norm	13.661	14.814	5.23445	2.96443	-2.27002	0		0.882719	-0.675943	3
0000033_43.tif	control	norm	13.918	14.474	5.23445	2.81054	-2.42391	0		0.836894	-0.721769	3
0000033_43.tif	control	norm	14.036	14.446	5.23445	2.85895	-2.3755	0		0.85131	-0.707352	3
0000033_43.tif	control	norm	13.606	13.78	5.23445	2.07062	-3.16383	0		0.616569	-0.942094	3
0000033_43.tif	control	norm	14.891	14.918	5.23445	3.77675	-1.4577	0		1.1246	-0.434059	3
0000033_43.tif	control	norm	15.002	14.592	5.23445	3.63129	-1.60316	0		1.08129	-0.477373	3
0000033_43.tif	control	norm	15.557	15.113	5.23445	4.39219	-0.842258	0		1.30786	-0.250799	3
0000033_43.tif	control	norm	15.425	14.342	5.23445	3.8124	-1.42205	0		1.13522	-0.423444	3
0000033_43.tif	control	norm	15.842	13.842	5.23445	3.92881	-1.30564	0		1.16988	-0.38878	3
0000033_43.tif	control	norm	15.87	13.557	5.23445	3.84413	-1.39032	0		1.14467	-0.413996	3
0000033_43.tif	control	norm	12.939	12.571	5.23445	0.763186	-4.47127	0		0.227254	-1.33141	3
0000033_43.tif	control	norm	13.161	12.481	5.23445	0.930682	-4.30377	0		0.277129	-1.28153	3
0000033_43.tif	control	norm	13.557	11.648	5.23445	1.39212	-3.84234	0		0.41453	-1.14413	3
0000033_43.tif	control	norm	14.05	11.745	5.23445	1.82969	-3.40476	0		0.544828	-1.01383	3
0000033_43.tif	control	norm	14.217	12.377	5.23445	1.9497	-3.28475	0		0.580563	-0.9781	3
0000033_43.tif	control	norm	14.689	11.738	5.23445	2.45552	-2.77893	0		0.731181	-0.827481	3
0000033_43.tif	control	norm	15.516	12.3	5.23445	3.24177	-1.99268	0		0.965301	-0.593362	3
0000033_43.tif	control	norm	15.557	12.203	5.23445	3.28102	-1.95344	0		0.976988	-0.581675	3
0000033_43.tif	control	norm	16.168	12.349	5.23445	3.89513	-1.33933	0		1.15985	-0.398811	3
0000033_43.tif	control	norm	16.391	12.856	5.23445	4.16807	-1.06638	0		1.24113	-0.317537	3
0000033_43.tif	control	norm	16.786	12.03	5.23445	4.51294	-0.721507	0		1.34382	-0.214843	3
0000033_43.tif	control	norm	16.495	11.231	5.23445	4.32729	-0.907165	0		1.28854	-0.270127	3
0000033_43.tif	control	norm	16.446	10.821	5.23445	4.38991	-0.844544	0		1.30718	-0.25148	3
0000033_43.tif	control	norm	15.627	10.418	5.23445	3.79207	-1.44238	0		1.12917	-0.429497	3
0000033_43.tif	control	norm	15.766	9.62	5.23445	4.33595	-0.898505	0		1.29111	-0.267548	3
0000033_43.tif	control	norm	14.877	8.981	5.23445	4.13306	-1.1014	0		1.2307	-0.327963	3
0000033_43.tif	control	norm	13.932	9.946	5.23445	2.7913	-2.44315	0		0.831165	-0.727498	3
0000033_43.tif	control	norm	13.28	10.307	5.23445	2.13659	-3.09786	0		0.636212	-0.92245	3
0000033_43.tif	control	norm	13.793	10.814	5.23445	2.0501	-3.18435	0		0.61046	-0.948203	3
0000033_84.tif	control	norm	13.281	15.583	5.07303	4.4316	-0.641436	0		1.3196	-0.191	3
0000033_84.tif	control	norm	12.422	15.281	5.07303	4.55072	-0.522309	0		1.35507	-0.155528	3
0000033_84.tif	control	norm	13.24	14.833	5.07303	3.75918	-1.31385	0		1.11937	-0.391226	3
0000033_84.tif	control	norm	12.682	13.901	5.07303	3.29036	-1.78268	0		0.97977	-0.530827	3
0000033_84.tif	control	norm	12.766	13.776	5.07303	3.14125	-1.93178	0		0.935371	-0.575227	3
0000033_84.tif	control	norm	12.219	13.359	5.07303	3.27204	-1.80099	0		0.974316	-0.536281	3
0000033_84.tif	control	norm	12.849	13.479	5.07303	2.86873	-2.2043	0		0.854223	-0.656374	3
0000033_84.tif	control	norm	13.714	13.62	5.07303	2.46282	-2.61021	0		0.733355	-0.777242	3
0000033_84.tif	control	norm	14.552	13.938	5.07303	2.51086	-2.56217	0		0.747659	-0.762938	3
0000033_84.tif	control	norm	14.682	12.88	5.07303	1.44495	-3.62809	0		0.430262	-1.08034	3
0000033_84.tif	control	norm	14.37	12.87	5.07303	1.50901	-3.56402	0		0.449338	-1.06126	3
0000033_84.tif	control	norm	13.62	12.531	5.07303	1.65768	-3.41535	0		0.493608	-1.01699	3
0000033_84.tif	control	norm	12.422	11.818	5.07303	2.48075	-2.59229	0		0.738692	-0.771905	3
0000033_84.tif	control	norm	12.26	11.505	5.07303	2.61562	-2.45741	0		0.778854	-0.731744	3
0000033_84.tif	control	norm	13.172	11.177	5.07303	1.72443	-3.34861	0		0.513483	-0.997115	3
0000033_84.tif	control	norm	13.224	11.036	5.07303	1.70163	-3.3714	0		0.506694	-1.0039	3
0000033_84.tif	control	norm	13.141	10.865	5.07303	1.82938	-3.24365	0		0.544736	-0.965862	3
0000033_84.tif	control	norm	13.797	11.396	5.07303	1.07925	-3.99378	0		0.321369	-1.18923	3
0000033_84.tif	control	norm	13.766	11.198	5.07303	1.13683	-3.9362	0		0.338514	-1.17208	3
0000033_84.tif	control	norm	14.052	11.453	5.07303	0.823015	-4.25002	0		0.245069	-1.26553	3
0000033_84.tif	control	norm	14.448	11.401	5.07303	0.429579	-4.64346	0		0.127916	-1.38268	3
0000033_84.tif	control	norm	14.583	11.432	5.07303	0.292438	-4.7806	0		0.0870793	-1.42352	3
0000033_84.tif	control	norm	14.052	10.849	5.07303	1.0179	-4.05513	0		0.303101	-1.2075	3
0000033_84.tif	control	norm	10.578	9.146	5.07303	4.87477	-0.198261	0		1.45156	-0.0590361	3
0000033_84.tif	control	norm	10.594	9.036	5.07303	4.91373	-0.159308	0		1.46316	-0.047437	3
0000033_84.tif	control	norm	11.161	8.979	5.07303	4.45979	-0.61324	0		1.32799	-0.182605	3
0000033_84.tif	control	norm	11.839	8.484	5.07303	4.24295	-0.830088	0		1.26342	-0.247175	3
0000033_84.tif	control	norm	11.859	8.401	5.07303	4.28724	-0.785789	0		1.27661	-0.233985	3
0000033_84.tif	control	norm	14.188	9.073	5.07303	2.47237	-2.60067	0		0.736196	-0.774401	3
0000033_84.tif	control	norm	14.115	9.073	5.07303	2.49364	-2.5794	0		0.74253	-0.768067	3
0000033_84.tif	control	norm	14.078	8.615	5.07303	2.94297	-2.13006	0		0.876329	-0.634268	3
0000033_84.tif	control	norm	12.969	7.13	5.07303	4.71995	-0.35308	0		1.40546	-0.105137	3
0000033_84.tif	control	norm	12.745	7.13	5.07303	4.81477	-0.258262	0		1.43369	-0.0769028	3
0000033_84.tif	control	norm	16.208	7.104	5.07303	4.54392	-0.529112	0		1.35304	-0.157554	3
0000033_84.tif	control	norm	16.208	7.203	5.07303	4.44937	-0.623662	0		1.32489	-0.185708	3
0000033_84.tif	control	norm	15.219	8.641	5.07303	2.828	-2.24503	0		0.842094	-0.668504	3
0000033_84.tif	control	norm	15.302	8.672	5.07303	2.80865	-2.26439	0		0.836331	-0.674266	3
0000033_84.tif	control	norm	16.406	9.245	5.07303	2.68275	-2.39028	0		0.798844	-0.711754	3
0000033_84.tif	control	norm	16.896	9.266	5.07303	2.97415	-2.09888	0		0.885612	-0.624985	3
0000033_84.tif	control	norm	15.812	10.104	5.07303	1.63838	-3.43465	0		0.487862	-1.02274	3
0000033_84.tif	control	norm	16.135	11.474	5.07303	1.26027	-3.81277	0		0.37527	-1.13533	3
0000033_84.tif	control	norm	16.297	11.635	5.07303	1.43424	-3.63879	0		0.427075	-1.08352	3
0000033_84.tif	control	norm	16.333	11.849	5.07303	1.51214	-3.56089	0		0.45027	-1.06033	3
0000033_84.tif	control	norm	16.224	11.922	5.07303	1.42985	-3.64318	0		0.425767	-1.08483	3
0000033_84.tif	control	norm	16.057	12.255	5.07303	1.43121	-3.64182	0		0.426173	-1.08442	3
0000033_84.tif	control	norm	16.01	12.312	5.07303	1.42644	-3.6466	0		0.42475	-1.08585	3
0000033_84.tif	control	norm	16.005	12.693	5.07303	1.68135	-3.39169	0		0.500654	-1.00994	3
0000033_84.tif	control	norm	15.932	12.974	5.07303	1.85632	-3.21671	0		0.552756	-0.957841	3
0000033_84.tif	control	norm	16.375	14.182	5.07303	3.11845	-1.95458	0		0.928582	-0.582015	3
0000033_84.tif	control	norm	15.307	15.255	5.07303	3.83143	-1.2416	0		1.14089	-0.369712	3
0000033_84.tif	control	norm	15.37	15.276	5.07303	3.85987	-1.21316	0		1.14935	-0.361243	3
0000033_84.tif	control	norm	16.328	15.062	5.07303	3.89515	-1.17788	0		1.15986	-0.350738	3
0000033_84.tif	control	norm	16.516	15.156	5.07303	4.05489	-1.01814	0		1.20743	-0.303172	3
0000033_84.tif	control	norm	16.427	15.995	5.07303	4.80457	-0.268462	0		1.43066	-0.0799399	3
0000033_84.tif	control	norm	16.406	16.188	5.07303	4.98112	-0.0919134	0		1.48323	-0.0273691	3
0000033_84.tif	control	norm	17.031	14.286	5.07303	3.56407	-1.50897	0		1.06127	-0.449325	3
0000033_84.tif	control	norm	18.005	13.125	5.07303	3.55095	-1.52209	0		1.05737	-0.453232	3
0000033_84.tif	control	norm	18.094	13.089	5.07303	3.61315	-1.45989	0		1.07589	-0.43471	3
0000033_84.tif	control	norm	19.005	11.115	5.07303	4.1434	-0.929631	0		1.23378	-0.276816	3
0000033_84.tif	control	norm	17.38	10.521	5.07303	2.67102	-2.40201	0		0.79535	-0.715247	3
0000033_84.tif	control	norm	17.391	10.219	5.07303	2.80012	-2.27291	0		0.833793	-0.676804	3
0000035_83.tif	predator	norm	8.865	10.5	5.40622	5.06277	-0.34345	0		1.50754	-0.102269	5
0000035_83.tif	predator	norm	8.234	11.384	5.40622	5.68716	0.280942	1		1.69347	0.0836561	5
0000035_83.tif	predator	norm	8.741	11.842	5.40622	5.23826	-0.167961	0		1.5598	-0.0500138	5
0000035_83.tif	predator	norm	9.095	11.759	5.40622	4.87543	-0.53079	0		1.45176	-0.158053	5
0000035_83.tif	predator	norm	7.116	11.578	5.40622	6.81726	1.41104	1		2.02997	0.420164	5
0000035_83.tif	predator	norm	6.72	13.168	5.40622	7.51493	2.10871	1		2.23772	0.627911	5
0000035_83.tif	predator	norm	7.234	13.21	5.40622	7.0383	1.63208	1		2.09579	0.485984	5
0000035_83.tif	predator	norm	8.908	12.786	5.40622	5.31803	-0.0881852	0		1.58355	-0.0262589	5
0000035_83.tif	predator	norm	9.498	12.877	5.40622	4.80322	-0.602999	0		1.43025	-0.179555	5
0000035_83.tif	predator	norm	9.491	13.099	5.40622	4.90195	-0.504269	0		1.45965	-0.150156	5
0000035_83.tif	predator	norm	9.512	13.752	5.40622	5.20118	-0.205035	0		1.54876	-0.0610533	5
0000035_83.tif	predator	norm	10.095	13.474	5.40622	4.56056	-0.845656	0		1.358	-0.251811	5
0000035_83.tif	predator	norm	8.484	14.793	5.40622	6.63484	1.22862	1		1.97566	0.365845	5
0000035_83.tif	predator	norm	10.887	13.807	5.40622	4.1435	-1.26272	0		1.23381	-0.376	5
0000035_83.tif	predator	norm	11.297	10.356	5.40622	2.68005	-2.72617	0		0.798037	-0.811773	5
0000035_83.tif	predator	norm	10.727	8.918	5.40622	3.78321	-1.62301	0		1.12653	-0.483285	5
0000035_83.tif	predator	norm	15.179	5.793	5.40622	5.33024	-0.0759755	0		1.58719	-0.0226232	5
0000035_83.tif	predator	norm	16.255	6.224	5.40622	5.2946	-0.111616	0		1.57657	-0.033236	5
0000035_83.tif	predator	norm	15.825	6.675	5.40622	4.7033	-0.702924	0		1.4005	-0.20931	5
0000035_83.tif	predator	norm	16.436	6.828	5.40622	4.85271	-0.553511	0		1.44499	-0.164819	5
0000035_83.tif	predator	norm	16.457	7.189	5.40622	4.56026	-0.845957	0		1.35791	-0.251901	5
0000035_83.tif	predator	norm	16.595	7.21	5.40622	4.62177	-0.784445	0		1.37623	-0.233584	5
0000035_83.tif	predator	norm	16.498	7.481	5.40622	4.34564	-1.06058	0		1.294	-0.315808	5
0000035_83.tif	predator	norm	17.248	7.46	5.40622	4.84583	-0.560392	0		1.44294	-0.166868	5
0000035_83.tif	predator	norm	17.179	6.793	5.40622	5.3058	-0.100421	0		1.57991	-0.0299023	5
0000035_83.tif	predator	norm	15.547	7.682	5.40622	3.67386	-1.73236	0		1.09397	-0.515845	5
0000035_83.tif	predator	norm	15.839	7.911	5.40622	3.61771	-1.78851	0		1.07725	-0.532563	5
0000035_83.tif	predator	norm	15.839	7.911	5.40622	3.61771	-1.78851	0		1.07725	-0.532563	5
0000035_83.tif	predator	norm	13.672	8.106	5.40622	2.87255	-2.53367	0		0.855358	-0.754452	5
0000035_83.tif	predator	norm	12.158	8.564	5.40622	2.97313	-2.43309	0		0.88531	-0.7245	5
0000035_83.tif	predator	norm	17.109	8.634	5.40622	3.96377	-1.44245	0		1.18029	-0.42952	5
0000035_83.tif	predator	norm	16.304	9.724	5.40622	2.70193	-2.70429	0		0.804554	-0.805256	5
0000035_83.tif	predator	norm	14.839	10.467	5.40622	1.05948	-4.34674	0		0.315481	-1.29433	5
0000035_83.tif	predator	norm	11.825	14.168	5.40622	3.8163	-1.58992	0		1.13638	-0.47343	5
0000035_83.tif	predator	norm	12.283	13.175	5.40622	2.73872	-2.6675	0		0.815507	-0.794303	5
0000035_83.tif	predator	norm	11.957	15.342	5.40622	4.78766	-0.618556	0		1.42562	-0.184187	5
0000035_83.tif	predator	norm	11.936	15.703	5.40622	5.12754	-0.278681	0		1.52683	-0.0829828	5
0000035_83.tif	predator	norm	13.352	16.085	5.40622	5.14591	-0.260312	0		1.5323	-0.077513	5
0000035_83.tif	predator	norm	13.943	16.377	5.40622	5.40813	0.00190666	1		1.61038	0.000567745	5
0000035_83.tif	predator	norm	14.095	15.849	5.40622	4.88366	-0.522561	0		1.45421	-0.155603	5
0000035_83.tif	predator	norm	14.72	16.3	5.40622	5.39279	-0.0134324	0		1.60581	-0.00399977	5
0000035_83.tif	predator	norm	15.026	16.516	5.40622	5.65894	0.252721	1		1.68506	0.0752526	5
0000035_83.tif	predator	norm	15.193	15.703	5.40622	4.90583	-0.500394	0		1.46081	-0.149002	5
0000035_83.tif	predator	norm	14.741	15.231	5.40622	4.34303	-1.06319	0		1.29322	-0.316587	5
0000035_83.tif	predator	norm	16.491	15.599	5.40622	5.30275	-0.103473	0		1.579	-0.0308111	5
0000035_83.tif	predator	norm	16.908	14.835	5.40622	4.89469	-0.511533	0		1.45749	-0.152319	5
0000035_83.tif	predator	norm	12.87	18.241	5.40622	7.34543	1.93921	1		2.18725	0.577437	5
0000035_83.tif	predator	norm	17.446	14.658	5.40622	5.11276	-0.293459	0		1.52243	-0.0873834	5
0000035_83.tif	predator	norm	17.78	14.359	5.40622	5.14781	-0.258407	0		1.53286	-0.0769459	5
0000035_83.tif	predator	norm	17.342	12.436	5.40622	3.73607	-1.67015	0		1.11249	-0.497322	5
0000035_83.tif	predator	norm	17.356	12.283	5.40622	3.69176	-1.71446	0		1.0993	-0.510515	5
0000035_83.tif	predator	norm	17.953	11.505	5.40622	4.08234	-1.32388	0		1.2156	-0.394212	5
0000035_83.tif	predator	norm	18.974	11.151	5.40622	5.07127	-0.334953	0		1.51007	-0.099739	5
0000035_83.tif	predator	norm	18.634	12.269	5.40622	4.90347	-0.502753	0		1.46011	-0.149705	5
0000035_83.tif	predator	norm	18.953	12.818	5.40622	5.37504	-0.0311841	0		1.60052	-0.00928569	5
0000035_83.tif	predator	norm	18.884	13.04	5.40622	5.39162	-0.0146037	0		1.60546	-0.00434855	5
0000035_83.tif	predator	norm	18.189	13.193	5.40622	4.826	-0.580221	0		1.43704	-0.172772	5
0000035_83.tif	predator	norm	18.12	12.977	5.40622	4.66796	-0.738259	0		1.38998	-0.219831	5
0000035_83.tif	predator	norm	17.606	9.377	5.40622	4.02796	-1.37826	0		1.19941	-0.410404	5
0000035_83.tif	predator	norm	17.675	9.238	5.40622	4.1475	-1.25872	0		1.235	-0.37481	5
0000035_83.tif	predator	norm	17.627	9.161	5.40622	4.13699	-1.26923	0		1.23187	-0.377938	5
0000035_83.tif	predator	norm	17.543	9.057	5.40622	4.10896	-1.29726	0		1.22352	-0.386287	5
0000035_83.tif	predator	norm	17.731	8.821	5.40622	4.38686	-1.01936	0		1.30627	-0.303535	5
0000035_83.tif	predator	norm	17.759	8.446	5.40622	4.60556	-0.800665	0		1.3714	-0.238414	5
0000035_83.tif	predator	norm	17.793	8.113	5.40622	4.82343	-0.582787	0		1.43627	-0.173536	5
0000035_83.tif	predator	norm	18.002	7.856	5.40622	5.1447	-0.261515	0		1.53194	-0.0778714	5
0000035_83.tif	predator	norm	18.599	8.495	5.40622	5.30518	-0.101041	0		1.57972	-0.0300869	5
0000035_83.tif	predator	norm	18.835	9.196	5.40622	5.23818	-0.168036	0		1.55977	-0.0500361	5
0000035_83.tif	predator	norm	19.141	8.245	5.40622	5.90131	0.495085	1		1.75723	0.147421	5
0000035_84.tif	predator	norm	13.094	16.062	5.36464	4.08762	-1.27702	0		1.21717	-0.380257	5
0000035_84.tif	predator	norm	12.391	16.469	5.36464	4.72419	-0.640452	0		1.40672	-0.190707	5
0000035_84.tif	predator	norm	11.682	16.464	5.36464	5.05736	-0.307282	0		1.50593	-0.0914994	5
0000035_84.tif	predator	norm	11.625	16.375	5.36464	5.01306	-0.351576	0		1.49274	-0.104689	5
0000035_84.tif	predator	norm	10.833	15.578	5.36464	4.90325	-0.461393	0		1.46004	-0.137389	5
0000035_84.tif	predator	norm	10.76	15.469	5.36464	4.88193	-0.482704	0		1.45369	-0.143735	5
0000035_84.tif	predator	norm	9.724	12.708	5.36464	4.67128	-0.693361	0		1.39097	-0.206462	5
0000035_84.tif	predator	norm	9.88	13.219	5.36464	4.60445	-0.760186	0		1.37107	-0.226361	5
0000035_84.tif	predator	norm	10.37	12.917	5.36464	4.06296	-1.30168	0		1.20983	-0.387602	5
0000035_84.tif	predator	norm	10.49	12.927	5.36464	3.94691	-1.41773	0		1.17527	-0.422156	5
0000035_84.tif	predator	norm	11.682	12.719	5.36464	2.7372	-2.62744	0		0.815055	-0.782373	5
0000035_84.tif	predator	norm	10.776	11.911	5.36464	3.59884	-1.7658	0		1.07163	-0.525801	5
0000035_84.tif	predator	norm	12.599	11.948	5.36464	1.78079	-3.58385	0		0.530264	-1.06716	5
0000035_84.tif	predator	norm	14	13.38	5.36464	1.25715	-4.10749	0		0.374342	-1.22309	5
0000035_84.tif	predator	norm	14.078	13.943	5.36464	1.78917	-3.57547	0		0.532761	-1.06467	5
0000035_84.tif	predator	norm	13.062	14.177	5.36464	2.38701	-2.97763	0		0.710779	-0.886649	5
0000035_84.tif	predator	norm	9.964	10.849	5.36464	4.597	-0.767642	0		1.36885	-0.228581	5
0000035_84.tif	predator	norm	9.745	10.651	5.36464	4.8655	-0.49914	0		1.4488	-0.148629	5
0000035_84.tif	predator	norm	10.062	9.75	5.36464	4.94026	-0.424382	0		1.47106	-0.126368	5
0000035_84.tif	predator	norm	10.266	9.688	5.36464	4.79551	-0.569128	0		1.42796	-0.169469	5
0000035_84.tif	predator	norm	11.224	9.547	5.36464	4.09668	-1.26796	0		1.21987	-0.37756	5
0000035_84.tif	predator	norm	12.953	8.979	5.36464	3.49585	-1.86879	0		1.04096	-0.55647	5
0000035_84.tif	predator	norm	12.276	8.885	5.36464	3.89887	-1.46577	0		1.16097	-0.436462	5
0000035_84.tif	predator	norm	11.255	8.63	5.36464	4.71734	-0.647298	0		1.40468	-0.192746	5
0000035_84.tif	predator	norm	11.88	8.036	5.36464	4.8294	-0.535239	0		1.43805	-0.159378	5
0000035_84.tif	predator	norm	11.677	8.589	5.36464	4.4832	-0.881438	0		1.33496	-0.262466	5
0000035_84.tif	predator	norm	13.641	7.938	5.36464	4.30038	-1.06426	0		1.28053	-0.316903	5
0000035_84.tif	predator	norm	13.594	7.375	5.36464	4.8635	-0.501138	0		1.4482	-0.149224	5
0000035_84.tif	predator	norm	14.193	7.255	5.36464	4.925	-0.439635	0		1.46652	-0.13091	5
0000035_84.tif	predator	norm	10.898	5.974	5.36464	7.10615	1.74151	1		2.116	0.518568	5
0000035_84.tif	predator	norm	16.01	6.526	5.36464	5.88556	0.520922	1		1.75254	0.155115	5
0000035_84.tif	predator	norm	15.849	6.75	5.36464	5.62624	0.261602	1		1.67533	0.0778971	5
0000035_84.tif	predator	norm	15.714	7.052	5.36464	5.29957	-0.0650705	0		1.57805	-0.0193761	5
0000035_84.tif	predator	norm	15.885	7.286	5.36464	5.12175	-0.242893	0		1.5251	-0.0723263	5
0000035_84.tif	predator	norm	15.62	7.307	5.36464	5.02911	-0.335531	0		1.49752	-0.0999111	5
0000035_84.tif	predator	norm	15.438	8.073	5.36464	4.24195	-1.12269	0		1.26313	-0.334303	5
0000035_84.tif	predator	norm	14.87	7.948	5.36464	4.25905	-1.10559	0		1.26822	-0.329213	5
0000035_84.tif	predator	norm	16.948	8.214	5.36464	4.73046	-0.634178	0		1.40859	-0.188839	5
0000035_84.tif	predator	norm	17.167	7.896	5.36464	5.11646	-0.248179	0		1.52353	-0.0739002	5
0000035_84.tif	predator	norm	17.354	8.62	5.36464	4.64611	-0.718526	0		1.38347	-0.213955	5
0000035_84.tif	predator	norm	17.438	8.568	5.36464	4.74006	-0.624575	0		1.41145	-0.18598	5
0000035_84.tif	predator	norm	17.578	9	5.36464	4.51848	-0.846155	0		1.34547	-0.25196	5
0000035_84.tif	predator	norm	16.833	8.573	5.36464	4.36805	-0.996591	0		1.30067	-0.296755	5
0000035_84.tif	predator	norm	17.547	9.693	5.36464	4.03675	-1.32789	0		1.20202	-0.395404	5
0000035_84.tif	predator	norm	18.391	9.812	5.36464	4.66925	-0.695388	0		1.39036	-0.207066	5
0000035_84.tif	predator	norm	18.521	9.609	5.36464	4.88538	-0.479257	0		1.45472	-0.142708	5
0000035_84.tif	predator	norm	14.458	10.682	5.36464	1.49789	-3.86675	0		0.446027	-1.1514	5
0000035_84.tif	predator	norm	15.177	10.411	5.36464	1.94373	-3.42091	0		0.578786	-1.01864	5
0000035_84.tif	predator	norm	16.167	11.115	5.36464	2.09166	-3.27298	0		0.622834	-0.974595	5
0000035_84.tif	predator	norm	13.823	12.156	5.36464	0.542407	-4.82223	0		0.161512	-1.43592	5
0000035_84.tif	predator	norm	18.312	11.031	5.36464	4.11	-1.25464	0		1.22384	-0.373593	5
0000035_84.tif	predator	norm	18.38	10.969	5.36464	4.19279	-1.17185	0		1.24849	-0.348941	5
0000035_84.tif	predator	norm	15.688	13.391	5.36464	1.79558	-3.56905	0		0.534671	-1.06276	5
0000035_84.tif	predator	norm	16.38	13.635	5.36464	2.48716	-2.87747	0		0.740603	-0.856825	5
0000035_84.tif	predator	norm	15.974	13.812	5.36464	2.29393	-3.07071	0		0.683063	-0.914366	5
0000035_84.tif	predator	norm	17.474	13.464	5.36464	3.36486	-1.99978	0		1.00195	-0.595476	5
0000035_84.tif	predator	norm	17.141	13.062	5.36464	2.91366	-2.45098	0		0.8676	-0.729829	5
0000035_84.tif	predator	norm	17.344	15.578	5.36464	4.5212	-0.84344	0		1.34628	-0.251151	5
0000035_84.tif	predator	norm	15.057	17.281	5.36464	5.1507	-0.213942	0		1.53372	-0.0637055	5
0000035_84.tif	predator	norm	15.87	17.115	5.36464	5.16225	-0.202385	0		1.53716	-0.0602641	5
0000035_84.tif	predator	norm	15.99	16.87	5.36464	4.96637	-0.398265	0		1.47884	-0.118591	5
0000035_84.tif	predator	norm	15.078	16.74	5.36464	4.61837	-0.746269	0		1.37521	-0.222217	5
0000035_84.tif	predator	norm	18.922	9.75	5.36464	5.163	-0.201638	0		1.53739	-0.0600418	5
0000035_84.tif	predator	norm	19.047	10.292	5.36464	5.04721	-0.317427	0		1.50291	-0.0945202	5
0000035_84.tif	predator	norm	19.052	10.531	5.36464	4.96762	-0.397015	0		1.47921	-0.118219	5
0000035_84.tif	predator	norm	19.318	10.76	5.36464	5.15171	-0.212931	0		1.53402	-0.0634044	5
0000035_84.tif	predator	norm	19.312	11.766	5.36464	4.96404	-0.400595	0		1.47814	-0.119285	5
0000035_84.tif	predator	norm	19.276	11.865	5.36464	4.9209	-0.443738	0		1.4653	-0.132132	5
0000035_84.tif	predator	norm	19.812	12.531	5.36464	5.45849	0.0938521	1		1.62537	0.0279463	5
0000038_46.tif	control	norm	12.24	14.021	4.94795	3.47926	-1.46868	0		1.03602	-0.43733	2
0000038_46.tif	control	norm	12.207	13.047	4.94795	2.79213	-2.15582	0		0.831412	-0.641938	2
0000038_46.tif	control	norm	11.79	12.484	4.94795	2.83649	-2.11146	0		0.844621	-0.628728	2
0000038_46.tif	control	norm	11.708	12.438	4.94795	2.89134	-2.05661	0		0.860954	-0.612396	2
0000038_46.tif	control	norm	11.635	12.375	4.94795	2.93331	-2.01464	0		0.873452	-0.599898	2
0000038_46.tif	control	norm	11.984	11.505	4.94795	2.37374	-2.57421	0		0.706828	-0.766522	2
0000038_46.tif	control	norm	12.078	11.438	4.94795	2.27379	-2.67416	0		0.677065	-0.796285	2
0000038_46.tif	control	norm	12.604	11.125	4.94795	1.74448	-3.20346	0		0.519455	-0.953895	2
0000038_46.tif	control	norm	14.385	9.594	4.94795	1.65651	-3.29144	0		0.493258	-0.980092	2
0000038_46.tif	control	norm	15.87	9.005	4.94795	2.71454	-2.23341	0		0.808307	-0.665043	2
0000038_46.tif	control	norm	15.932	9.016	4.94795	2.74089	-2.20705	0		0.816156	-0.657194	2
0000038_46.tif	control	norm	15.203	10.016	4.94795	1.50354	-3.4444	0		0.44771	-1.02564	2
0000038_46.tif	control	norm	15.266	10.896	4.94795	0.987623	-3.96032	0		0.294085	-1.17927	2
0000038_46.tif	control	norm	15.141	10.906	4.94795	0.86807	-4.07988	0		0.258485	-1.21486	2
0000038_46.tif	control	norm	13.849	10.672	4.94795	0.760992	-4.18695	0		0.226601	-1.24675	2
0000038_46.tif	control	norm	13.698	10.724	4.94795	0.833062	-4.11488	0		0.248061	-1.22529	2
0000038_46.tif	control	norm	13.609	10.724	4.94795	0.903826	-4.04412	0		0.269132	-1.20422	2
0000038_46.tif	control	norm	14.615	11.734	4.94795	0.554704	-4.39324	0		0.165174	-1.30818	2
0000038_46.tif	control	norm	12.995	15	4.94795	3.98526	-0.962685	0		1.18669	-0.286659	2
0000038_46.tif	control	norm	17.016	14.01	4.94795	3.84151	-1.10644	0		1.14389	-0.329464	2
0000038_46.tif	control	norm	17.026	13.88	4.94795	3.75633	-1.19161	0		1.11852	-0.354827	2
0000038_46.tif	control	norm	16.828	11.724	4.94795	2.52882	-2.41913	0		0.753007	-0.720343	2
0000038_46.tif	control	norm	17.13	11.682	4.94795	2.81929	-2.12865	0		0.839501	-0.633849	2
0000038_46.tif	control	norm	16.901	11.557	4.94795	2.57536	-2.37258	0		0.766866	-0.706484	2
0000038_46.tif	control	norm	16.807	11.203	4.94795	2.46345	-2.4845	0		0.733541	-0.739809	2
0000038_46.tif	control	norm	17.083	11.094	4.94795	2.74344	-2.20451	0		0.816914	-0.656436	2
0000038_46.tif	control	norm	17.089	11.026	4.94795	2.75412	-2.19382	0		0.820096	-0.653254	2
0000038_46.tif	control	norm	16.411	10.922	4.94795	2.09286	-2.85508	0		0.623192	-0.850158	2
0000038_46.tif	control	norm	16.229	10.693	4.94795	1.96557	-2.98237	0		0.585288	-0.888061	2
0000038_46.tif	control	norm	17.229	10.234	4.94795	3.05867	-1.88927	0		0.910781	-0.562569	2
0000038_46.tif	control	norm	17.214	9.76	4.94795	3.23373	-1.71422	0		0.962907	-0.510443	2
0000047_12.tif	control	norm	12.016	13.391	4.93761	2.71569	-2.22192	0		0.80865	-0.661622	1
0000047_12.tif	control	norm	12.339	13.464	4.93761	2.60392	-2.33369	0		0.775369	-0.694903	1
0000047_12.tif	control	norm	12.26	12.516	4.93761	1.88942	-3.04819	0		0.562614	-0.907659	1
0000047_12.tif	control	norm	12.193	12.406	4.93761	1.86399	-3.07362	0		0.555039	-0.915233	1
0000047_12.tif	control	norm	11.797	12.323	4.93761	2.13389	-2.80372	0		0.635408	-0.834865	1
0000047_12.tif	control	norm	11.286	10.677	4.93761	2.37366	-2.56395	0		0.706804	-0.763468	1
0000047_12.tif	control	norm	11.344	10.63	4.93761	2.32787	-2.60974	0		0.693169	-0.777103	1
0000047_12.tif	control	norm	10.839	10.193	4.93761	2.93858	-1.99903	0		0.875021	-0.595251	1
0000047_12.tif	control	norm	11.714	9.141	4.93761	2.78609	-2.15152	0		0.829615	-0.640657	1
0000047_12.tif	control	norm	13.078	8.427	4.93761	2.81066	-2.12695	0		0.83693	-0.633343	1
0000047_12.tif	control	norm	12.646	11.688	4.93761	1.08063	-3.85698	0		0.32178	-1.14849	1
0000047_12.tif	control	norm	13.234	14.453	4.93761	3.2859	-1.65171	0		0.978442	-0.49183	1
0000047_12.tif	control	norm	14.078	14.521	4.93761	3.36654	-1.57107	0		1.00245	-0.467819	1
0000047_12.tif	control	norm	14.198	14.323	4.93761	3.19078	-1.74683	0		0.950118	-0.520154	1
0000047_12.tif	control	norm	13.984	14.036	4.93761	2.87324	-2.06437	0		0.855564	-0.614708	1
0000047_12.tif	control	norm	15.198	15.229	4.93761	4.34402	-0.593589	0		1.29352	-0.176753	1
0000047_12.tif	control	norm	15.969	15.151	4.93761	4.61504	-0.32257	0		1.37422	-0.0960516	1
0000047_12.tif	control	norm	15.281	14.625	4.93761	3.8243	-1.11331	0		1.13876	-0.331509	1
0000047_12.tif	control	norm	15.214	13.219	4.93761	2.59173	-2.34588	0		0.771739	-0.698533	1
0000047_12.tif	control	norm	16.885	13.281	4.93761	3.89174	-1.04587	0		1.15884	-0.31143	1
0000047_12.tif	control	norm	14.859	10.26	4.93761	1.56084	-3.37677	0		0.46477	-1.0055	1
0000047_12.tif	control	norm	14.568	10.281	4.93761	1.32361	-3.614	0		0.394132	-1.07614	1
0000047_12.tif	control	norm	14.339	8.786	4.93761	2.51194	-2.42567	0		0.74798	-0.722293	1
0000047_12.tif	control	norm	14.203	8.422	4.93761	2.83012	-2.10749	0		0.842724	-0.627548	1
0000047_61.tif	control	norm	9.05	15.03	5.22413	4.98274	-0.241394	0		1.48371	-0.07188	4
0000047_61.tif	control	norm	9.141	15.155	5.22413	4.96851	-0.255622	0		1.47947	-0.0761166	4
0000047_61.tif	control	norm	8.724	14.418	5.22413	5.00859	-0.215545	0		1.49141	-0.0641829	4
0000047_61.tif	control	norm	9.432	13.925	5.22413	4.17214	-1.052	0		1.24234	-0.313253	4
0000047_61.tif	control	norm	9.3	13.321	5.22413	4.14294	-1.08119	0		1.23364	-0.321946	4
0000047_61.tif	control	norm	9.877	15.231	5.22413	4.4051	-0.819034	0		1.31171	-0.243884	4
0000047_61.tif	control	norm	11.203	14.939	5.22413	3.22762	-1.99651	0		0.961089	-0.594501	4
0000047_61.tif	control	norm	11.266	14.891	5.22413	3.14979	-2.07435	0		0.937912	-0.617678	4
0000047_61.tif	control	norm	10.863	14.967	5.22413	3.48446	-1.73968	0		1.03757	-0.518023	4
0000047_61.tif	control	norm	12.203	14.835	5.22413	2.56843	-2.6557	0		0.764801	-0.790789	4
0000047_61.tif	control	norm	13.168	14.016	5.22413	1.48282	-3.74131	0		0.44154	-1.11405	4
0000047_61.tif	control	norm	13.168	14.016	5.22413	1.48282	-3.74131	0		0.44154	-1.11405	4
0000047_61.tif	control	norm	11.8	13.502	5.22413	1.83764	-3.38649	0		0.547194	-1.0084	4
0000047_61.tif	control	norm	11.328	13.155	5.22413	2.13059	-3.09354	0		0.634427	-0.921163	4
0000047_61.tif	control	norm	11.418	13.175	5.22413	2.05053	-3.1736	0		0.610587	-0.945003	4
0000047_61.tif	control	norm	10.12	13.418	5.22413	3.36469	-1.85944	0		1.0019	-0.553686	4
0000047_61.tif	control	norm	10.252	13.016	5.22413	3.15308	-2.07106	0		0.938891	-0.616699	4
0000047_61.tif	control	norm	8.682	12.432	5.22413	4.68941	-0.534723	0		1.39637	-0.159225	4
0000047_61.tif	control	norm	8.682	12.266	5.22413	4.69641	-0.527719	0		1.39845	-0.157139	4
0000047_61.tif	control	norm	9.78	12.071	5.22413	3.62142	-1.60271	0		1.07835	-0.47724	4
0000047_61.tif	control	norm	10.175	11.432	5.22413	3.38397	-1.84016	0		1.00764	-0.547946	4
0000047_61.tif	control	norm	9.807	10.918	5.22413	3.91773	-1.3064	0		1.16658	-0.389008	4
0000047_61.tif	control	norm	9.557	10.432	5.22413	4.3603	-0.863836	0		1.29837	-0.257224	4
0000047_61.tif	control	norm	12.55	12.071	5.22413	0.948143	-4.27599	0		0.282329	-1.27326	4
0000047_61.tif	control	norm	13.224	12.238	5.22413	0.341756	-4.88238	0		0.101765	-1.45383	4
0000047_61.tif	control	norm	13.238	12.141	5.22413	0.426919	-4.79721	0		0.127124	-1.42847	4
0000047_61.tif	control	norm	14.182	12.696	5.22413	0.825557	-4.39858	0		0.245826	-1.30976	4
0000047_61.tif	control	norm	13.363	10.488	5.22413	2.05901	-3.16512	0		0.613112	-0.942478	4
0000047_61.tif	control	norm	13.953	10.488	5.22413	2.13995	-3.08419	0		0.637212	-0.918378	4
0000047_61.tif	control	norm	13.37	10.071	5.22413	2.476	-2.74813	0		0.737279	-0.818312	4
0000047_61.tif	control	norm	13.078	9.911	5.22413	2.65212	-2.57201	0		0.789723	-0.765867	4
0000047_61.tif	control	norm	10.224	9.641	5.22413	4.28277	-0.94136	0		1.27528	-0.280309	4
0000047_61.tif	control	norm	10.175	9.55	5.22413	4.38064	-0.84349	0		1.30442	-0.251166	4
0000047_61.tif	control	norm	10.155	9.432	5.22413	4.47654	-0.747589	0		1.33298	-0.22261	4
0000047_61.tif	control	norm	10.918	8.905	5.22413	4.3905	-0.833636	0		1.30736	-0.248232	4
0000047_61.tif	control	norm	12.245	8.335	5.22413	4.35965	-0.864481	0		1.29817	-0.257417	4
0000047_61.tif	control	norm	12.356	7.8	5.22413	4.85409	-0.370042	0		1.4454	-0.110187	4
0000047_61.tif	control	norm	12.891	8.057	5.22413	4.51548	-0.708656	0		1.34457	-0.211016	4
0000047_61.tif	control	norm	14.582	10.842	5.22413	2.09188	-3.13225	0		0.6229	-0.932691	4
0000047_61.tif	control	norm	14.443	9.828	5.22413	2.92306	-2.30107	0		0.8704	-0.68519	4
0000047_61.tif	control	norm	15.234	8.724	5.22413	4.25321	-0.97092	0		1.26648	-0.289111	4
0000047_61.tif	control	norm	16.283	8.863	5.22413	4.69653	-0.5276	0		1.39849	-0.157104	4
0000047_61.tif	control	norm	16.089	10.071	5.22413	3.67744	-1.5467	0		1.09503	-0.46056	4
0000047_61.tif	control	norm	15.991	10.849	5.22413	3.12295	-2.10118	0		0.929922	-0.625668	4
0000047_61.tif	control	norm	15.727	11.474	5.22413	2.58974	-2.63439	0		0.771148	-0.784442	4
0000047_61.tif	control	norm	15.061	11.703	5.22413	1.88993	-3.33421	0		0.562763	-0.992827	4
0000047_61.tif	control	norm	14.616	11.675	5.22413	1.52082	-3.70331	0		0.452855	-1.10274	4
0000047_61.tif	control	norm	15.339	12.245	5.22413	1.99203	-3.23211	0		0.593165	-0.962425	4
0000047_61.tif	control	norm	14.359	12.655	5.22413	0.994879	-4.22925	0		0.296245	-1.25935	4
0000047_61.tif	control	norm	17.609	12.28	5.22413	4.2474	-0.976733	0		1.26475	-0.290842	4
0000047_61.tif	control	norm	17.318	11.71	5.22413	4.03575	-1.18838	0		1.20173	-0.353865	4
0000047_61.tif	control	norm	16.63	11.856	5.22413	3.33243	-1.8917	0		0.992297	-0.563293	4
0000047_61.tif	control	norm	16.63	11.856	5.22413	3.33243	-1.8917	0		0.992297	-0.563293	4
0000047_61.tif	control	norm	17.825	11.293	5.22413	4.62812	-0.596009	0		1.37812	-0.177473	4
0000047_61.tif	control	norm	17.387	10.696	5.22413	4.42295	-0.801183	0		1.31702	-0.238568	4
0000047_61.tif	control	norm	17.241	10.46	5.22413	4.39775	-0.826383	0		1.30952	-0.246072	4
0000047_61.tif	control	norm	17.227	13.089	5.22413	3.8949	-1.32924	0		1.15978	-0.395807	4
0000047_61.tif	control	norm	17.311	13.345	5.22413	4.02098	-1.20315	0		1.19733	-0.358263	4
0000047_61.tif	control	norm	17.311	14.714	5.22413	4.49748	-0.726649	0		1.33922	-0.216374	4
0000047_61.tif	control	norm	16.915	13.957	5.22413	3.81512	-1.40902	0		1.13603	-0.419563	4
0000047_61.tif	control	norm	16.609	14.248	5.22413	3.65849	-1.56565	0		1.08939	-0.466203	4
0000047_61.tif	control	norm	16.602	14.748	5.22413	3.91027	-1.31386	0		1.16436	-0.391229	4
0000047_61.tif	control	norm	15.498	14.616	5.22413	2.96802	-2.25611	0		0.883787	-0.671803	4
0000047_61.tif	control	norm	15.554	14.269	5.22413	2.78121	-2.44292	0		0.828161	-0.727429	4
0000047_61.tif	control	norm	15.637	14.165	5.22413	2.78518	-2.43896	0		0.829342	-0.726248	4
0000047_61.tif	control	norm	15.269	13.672	5.22413	2.20722	-3.01691	0		0.657244	-0.898346	4
0000047_61.tif	control	norm	14.998	15.297	5.22413	3.19576	-2.02837	0		0.951602	-0.603989	4
0000047_61.tif	control	norm	14.054	15.582	5.22413	3.11112	-2.11301	0		0.926399	-0.629191	4
0000047_61.tif	control	norm	13.922	15.637	5.22413	3.13892	-2.08522	0		0.934676	-0.620915	4
0000047_61.tif	control	norm	15.505	16.741	5.22413	4.70615	-0.517982	0		1.40135	-0.15424	4
0000047_61.tif	control	norm	11.946	16.957	5.22413	4.63421	-0.589926	0		1.37993	-0.175662	4
0000047_61.tif	control	norm	11.946	16.957	5.22413	4.63421	-0.589926	0		1.37993	-0.175662	4
0000047_61.tif	control	norm	12.175	16.429	5.22413	4.06177	-1.16237	0		1.20947	-0.346118	4
0000047_61.tif	control	norm	12.148	16.297	5.22413	3.94408	-1.28005	0		1.17443	-0.381161	4
0000047_61.tif	control	norm	12.766	15.818	5.22413	3.3263	-1.89784	0		0.990472	-0.565119	4
0000047_61.tif	control	norm	11.793	15.964	5.22413	3.76335	-1.46078	0		1.12061	-0.434977	4
0000047_61.tif	control	norm	11.231	15.72	5.22413	3.82665	-1.39748	0		1.13946	-0.416129	4
0000047_98.tif	control	norm	8.052	9.51	5.18238	5.11945	-0.0629284	0		1.52442	-0.0187382	6
0000047_98.tif	control	norm	8.175	9.318	5.18238	5.02912	-0.153258	0		1.49752	-0.0456357	6
0000047_98.tif	control	norm	8.905	8.13	5.18238	4.71095	-0.471432	0		1.40278	-0.140378	6
0000047_98.tif	control	norm	8.8	8.04	5.18238	4.84521	-0.337174	0		1.44276	-0.1004	6
0000047_98.tif	control	norm	8.96	7.512	5.18238	4.97141	-0.210975	0		1.48034	-0.062822	6
0000047_98.tif	control	norm	9.467	8.241	5.18238	4.1613	-1.02108	0		1.23911	-0.304046	6
0000047_98.tif	control	norm	9.578	7.991	5.18238	4.19247	-0.989911	0		1.24839	-0.294766	6
0000047_98.tif	control	norm	9.627	7.477	5.18238	4.44995	-0.732427	0		1.32506	-0.218095	6
0000047_98.tif	control	norm	9.627	7.311	5.18238	4.55467	-0.627716	0		1.35624	-0.186915	6
0000047_98.tif	control	norm	9.905	7.311	5.18238	4.34513	-0.837252	0		1.29385	-0.249308	6
0000047_98.tif	control	norm	10.286	7.457	5.18238	3.96778	-1.2146	0		1.18149	-0.361672	6
0000047_98.tif	control	norm	10.328	7.783	5.18238	3.71519	-1.46719	0		1.10627	-0.436884	6
0000047_98.tif	control	norm	10.46	6.623	5.18238	4.48497	-0.697415	0		1.33549	-0.207669	6
0000047_98.tif	control	norm	11.099	7.623	5.18238	3.30178	-1.8806	0		0.983172	-0.559986	6
0000047_98.tif	control	norm	11.925	7.165	5.18238	3.29345	-1.88894	0		0.980689	-0.562468	6
0000047_98.tif	control	norm	11.925	7.165	5.18238	3.29345	-1.88894	0		0.980689	-0.562468	6
0000047_98.tif	control	norm	12.418	6.644	5.18238	3.65799	-1.52439	0		1.08924	-0.453918	6
0000047_98.tif	control	norm	12.925	7.422	5.18238	2.81875	-2.36363	0		0.83934	-0.703818	6
0000047_98.tif	control	norm	11.703	8.484	5.18238	2.25175	-2.93063	0		0.670504	-0.872653	6
0000047_98.tif	control	norm	11.856	8.415	5.18238	2.21505	-2.96733	0		0.659576	-0.883582	6
0000047_98.tif	control	norm	11.793	8.248	5.18238	2.38854	-2.79384	0		0.711236	-0.831922	6
0000047_98.tif	control	norm	12.071	8.665	5.18238	1.88737	-3.29501	0		0.562002	-0.981156	6
0000047_98.tif	control	norm	12.321	8.589	5.18238	1.82878	-3.3536	0		0.544555	-0.998603	6
0000047_98.tif	control	norm	12.849	8.616	5.18238	1.64054	-3.54184	0		0.488503	-1.05465	6
0000047_98.tif	control	norm	12.96	8.54	5.18238	1.70154	-3.48084	0		0.506667	-1.03649	6
0000047_98.tif	control	norm	12.759	8.255	5.18238	2.01166	-3.17073	0		0.599011	-0.944147	6
0000047_98.tif	control	norm	11.148	8.45	5.18238	2.65922	-2.52316	0		0.791835	-0.751322	6
0000047_98.tif	control	norm	11.002	8.54	5.18238	2.71211	-2.47027	0		0.807586	-0.735572	6
0000047_98.tif	control	norm	13.016	9.061	5.18238	1.1776	-4.00478	0		0.350654	-1.1925	6
0000047_98.tif	control	norm	11.03	9.519	5.18238	2.20892	-2.97346	0		0.65775	-0.885408	6
0000047_98.tif	control	norm	11.085	9.818	5.18238	2.07708	-3.1053	0		0.618494	-0.924664	6
0000047_98.tif	control	norm	11.099	9.95	5.18238	2.04086	-3.14152	0		0.607706	-0.935452	6
0000047_98.tif	control	norm	11.155	9.79	5.18238	2.01454	-3.16784	0		0.599869	-0.943289	6
0000047_98.tif	control	norm	10.092	9.401	5.18238	3.14049	-2.04189	0		0.935143	-0.608014	6
0000047_98.tif	control	norm	8.335	10.547	5.18238	4.79523	-0.387155	0		1.42787	-0.115283	6
0000047_98.tif	control	norm	8.418	10.727	5.18238	4.72777	-0.454607	0		1.40779	-0.135368	6
0000047_98.tif	control	norm	8.391	10.859	5.18238	4.77012	-0.412259	0		1.4204	-0.122758	6
0000047_98.tif	control	norm	8.856	10.561	5.18238	4.27652	-0.905861	0		1.27342	-0.269738	6
0000047_98.tif	control	norm	8.967	10.526	5.18238	4.16325	-1.01913	0		1.23969	-0.303466	6
0000047_98.tif	control	norm	11.495	10.63	5.18238	1.67256	-3.50983	0		0.498037	-1.04512	6
0000047_98.tif	control	norm	11.752	10.609	5.18238	1.41847	-3.76391	0		0.422377	-1.12078	6
0000047_98.tif	control	norm	11.439	10.311	5.18238	1.68276	-3.49962	0		0.501076	-1.04208	6
0000047_98.tif	control	norm	11.28	10.276	5.18238	1.84048	-3.3419	0		0.54804	-0.995118	6
0000047_98.tif	control	norm	12.905	10.186	5.18238	0.220293	-4.96209	0		0.0655966	-1.47756	6
0000047_98.tif	control	norm	11.939	9.457	5.18238	1.41368	-3.7687	0		0.420951	-1.12221	6
0000047_98.tif	control	norm	8.488	11.033	5.18238	4.70041	-0.481975	0		1.39964	-0.143518	6
0000047_98.tif	control	norm	9.821	10.658	5.18238	3.32614	-1.85625	0		0.990423	-0.552734	6
0000047_98.tif	control	norm	9.557	11.609	5.18238	3.81911	-1.36327	0		1.13722	-0.405942	6
0000047_98.tif	control	norm	9.627	11.804	5.18238	3.82961	-1.35277	0		1.14034	-0.402813	6
0000047_98.tif	control	norm	9.543	12.977	5.18238	4.50766	-0.674724	0		1.34225	-0.200913	6
0000047_98.tif	control	norm	9.953	12.554	5.18238	3.92585	-1.25653	0		1.169	-0.374158	6
0000047_98.tif	control	norm	9.842	12.373	5.18238	3.91415	-1.26823	0		1.16552	-0.37764	6
0000047_98.tif	control	norm	9.967	12.297	5.18238	3.76794	-1.41444	0		1.12198	-0.421178	6
0000047_98.tif	control	norm	10.252	12.054	5.18238	3.39674	-1.78564	0		1.01145	-0.531711	6
0000047_98.tif	control	norm	10.488	12.227	5.18238	3.30143	-1.88095	0		0.983068	-0.560089	6
0000047_98.tif	control	norm	10.043	12.95	5.18238	4.10422	-1.07817	0		1.22211	-0.321045	6
0000047_98.tif	control	norm	10.224	12.797	5.18238	3.86727	-1.31511	0		1.15156	-0.3916	6
0000047_98.tif	control	norm	10.127	13.082	5.18238	4.13148	-1.0509	0		1.23023	-0.312926	6
0000047_98.tif	control	norm	9.87	13.547	5.18238	4.64096	-0.541426	0		1.38194	-0.16122	6
0000047_98.tif	control	norm	10.016	13.609	5.18238	4.58535	-0.597031	0		1.36538	-0.177778	6
0000047_98.tif	control	norm	10.134	13.644	5.18238	4.53258	-0.6498	0		1.34967	-0.193491	6
0000047_98.tif	control	norm	10.439	13.332	5.18238	4.09699	-1.08539	0		1.21996	-0.323196	6
0000047_98.tif	control	norm	10.571	13.276	5.18238	3.96877	-1.21361	0		1.18178	-0.361376	6
0000047_98.tif	control	norm	10.717	13.22	5.18238	3.83283	-1.34955	0		1.1413	-0.401855	6
0000047_98.tif	control	norm	11.141	13.582	5.18238	3.88916	-1.29322	0		1.15807	-0.385083	6
0000047_98.tif	control	norm	12.057	13.595	5.18238	3.52509	-1.65729	0		1.04967	-0.49349	6
0000047_98.tif	control	norm	12.939	13.436	5.18238	3.20711	-1.97527	0		0.954982	-0.588176	6
0000047_98.tif	control	norm	12.557	12.762	5.18238	2.58993	-2.59245	0		0.771204	-0.771953	6
0000047_98.tif	control	norm	12.849	11.665	5.18238	1.45643	-3.72595	0		0.433683	-1.10948	6
0000047_98.tif	control	norm	13.123	13.45	5.18238	3.216	-1.96638	0		0.957629	-0.585529	6
0000047_98.tif	control	norm	13.123	13.332	5.18238	3.098	-2.08438	0		0.922492	-0.620666	6
0000047_98.tif	control	norm	13.116	12.693	5.18238	2.459	-2.72338	0		0.732217	-0.81094	6
0000047_98.tif	control	norm	13.332	14.491	5.18238	4.26228	-0.920106	0		1.26918	-0.27398	6
0000047_98.tif	control	norm	13.484	14.429	5.18238	4.21076	-0.971619	0		1.25384	-0.289319	6
0000047_98.tif	control	norm	11.797	14.234	5.18238	4.21311	-0.969268	0		1.25454	-0.288619	6
0000047_98.tif	control	norm	13.901	12.991	5.18238	2.86549	-2.3169	0		0.853256	-0.689902	6
0000047_98.tif	control	norm	14.318	12.998	5.18238	3.01246	-2.16992	0		0.897019	-0.646138	6
0000047_98.tif	control	norm	14.54	12.943	5.18238	3.05861	-2.12377	0		0.910762	-0.632396	6
0000047_98.tif	control	norm	14.623	12.936	5.18238	3.09189	-2.09049	0		0.920673	-0.622484	6
0000047_98.tif	control	norm	15.186	13.707	5.18238	4.04105	-1.14133	0		1.2033	-0.339854	6
0000047_98.tif	control	norm	14.804	12.644	5.18238	2.94006	-2.24232	0		0.875462	-0.667696	6
0000047_98.tif	control	norm	14.908	12.339	5.18238	2.76188	-2.4205	0		0.822404	-0.720753	6
0000047_98.tif	control	norm	15.068	12.276	5.18238	2.82214	-2.36024	0		0.840348	-0.702809	6
0000047_98.tif	control	norm	14.922	12.193	5.18238	2.66174	-2.52064	0		0.792588	-0.75057	6
0000047_98.tif	control	norm	15.061	11.97	5.18238	2.60407	-2.57831	0		0.775414	-0.767744	6
0000047_98.tif	control	norm	14.554	11.575	5.18238	1.96332	-3.21906	0		0.584619	-0.958539	6
0000047_98.tif	control	norm	16.741	13.082	5.18238	4.60682	-0.575566	0		1.37177	-0.171386	6
0000047_98.tif	control	norm	17.012	13.026	5.18238	4.78988	-0.392504	0		1.42628	-0.116876	6
0000047_98.tif	control	norm	17.54	12.38	5.18238	4.91342	-0.26896	0		1.46307	-0.0800881	6
0000047_98.tif	control	norm	16.637	11.901	5.18238	3.89207	-1.29032	0		1.15894	-0.384217	6
0000047_98.tif	control	norm	16.415	11.207	5.18238	3.43566	-1.74672	0		1.02304	-0.520122	6
0000047_98.tif	control	norm	16.644	10.88	5.18238	3.58272	-1.59966	0		1.06683	-0.476331	6
0000047_98.tif	control	norm	17.595	10.95	5.18238	4.53192	-0.650464	0		1.34947	-0.193689	6
0000047_98.tif	control	norm	15.13	10.63	5.18238	2.04864	-3.13374	0		0.610023	-0.933135	6
0000047_98.tif	control	norm	16.616	9.102	5.18238	3.6747	-1.50768	0		1.09422	-0.448942	6
0000047_98.tif	control	norm	16.616	9.102	5.18238	3.6747	-1.50768	0		1.09422	-0.448942	6
0000047_98.tif	control	norm	16.804	8.943	5.18238	3.90366	-1.27872	0		1.16239	-0.380766	6
0000047_98.tif	control	norm	17.762	8.88	5.18238	4.83544	-0.346942	0		1.43985	-0.103309	6
0000047_98.tif	control	norm	17.908	8.901	5.18238	4.97009	-0.212288	0		1.47994	-0.0632129	6
0000047_98.tif	control	norm	16.158	8.707	5.18238	3.40017	-1.78221	0		1.01247	-0.530688	6
0000047_98.tif	control	norm	16.068	8.693	5.18238	3.32647	-1.85591	0		0.990522	-0.552636	6
0000047_98.tif	control	norm	13.075	8.821	5.18238	1.41372	-3.76867	0		0.420962	-1.1222	6
0000047_98.tif	control	norm	13.29	8.092	5.18238	2.14874	-3.03365	0		0.639829	-0.903329	6
0000047_98.tif	control	norm	13.734	8.335	5.18238	1.99579	-3.18659	0		0.594288	-0.94887	6
0000047_98.tif	control	norm	13.977	8.224	5.18238	2.18507	-2.99731	0		0.65065	-0.892508	6
0000047_98.tif	control	norm	14.207	8.418	5.18238	2.11647	-3.06592	0		0.63022	-0.912938	6
0000047_98.tif	control	norm	14.519	8.155	5.18238	2.50588	-2.6765	0		0.746176	-0.796981	6
0000047_98.tif	control	norm	15.345	8.286	5.18238	2.95725	-2.22513	0		0.88058	-0.662577	6
0000047_98.tif	control	norm	15.422	8.224	5.18238	3.05603	-2.12635	0		0.909993	-0.633164	6
0000047_98.tif	control	norm	15.637	8.161	5.18238	3.26077	-1.92161	0		0.970959	-0.572198	6
0000047_98.tif	control	norm	14.179	7.252	5.18238	3.16446	-2.01792	0		0.942281	-0.600877	6
0000047_98.tif	control	norm	14.207	7.12	5.18238	3.29827	-1.88411	0		0.982125	-0.561033	6
0000047_98.tif	control	norm	13.589	6.974	5.18238	3.29356	-1.88882	0		0.980724	-0.562433	6
0000048_52.tif	control	norm	13.38	15.141	5.08341	3.76986	-1.31355	0		1.12255	-0.391135	2
0000048_52.tif	control	norm	13.198	15.125	5.08341	3.82463	-1.25878	0		1.13886	-0.374827	2
0000048_52.tif	control	norm	11.405	13.502	5.08341	3.82692	-1.25648	0		1.13954	-0.374143	2
0000048_52.tif	control	norm	11.519	13.474	5.08341	3.71398	-1.36943	0		1.10591	-0.407775	2
0000048_52.tif	control	norm	12.113	13.363	5.08341	3.14988	-1.93352	0		0.937941	-0.575745	2
0000048_52.tif	control	norm	12.061	12.53	5.08341	2.82773	-2.25568	0		0.842014	-0.671673	2
0000048_52.tif	control	norm	12.033	12.411	5.08341	2.8188	-2.26461	0		0.839355	-0.674332	2
0000048_52.tif	control	norm	11.87	10.127	5.08341	3.23742	-1.84599	0		0.964007	-0.549679	2
0000048_52.tif	control	norm	11.908	10.047	5.08341	3.24196	-1.84145	0		0.965359	-0.548328	2
0000048_52.tif	control	norm	14.043	7.186	5.08341	4.49339	-0.59002	0		1.338	-0.17569	2
0000048_52.tif	control	norm	13.54	9.762	5.08341	2.21603	-2.86738	0		0.659866	-0.85382	2
0000048_52.tif	control	norm	14.377	10.582	5.08341	1.10436	-3.97904	0		0.328846	-1.18484	2
0000048_52.tif	control	norm	14.366	10.63	5.08341	1.06297	-4.02044	0		0.31652	-1.19717	2
0000048_52.tif	control	norm	12.679	12.352	5.08341	2.18546	-2.89794	0		0.650765	-0.862921	2
0000048_52.tif	control	norm	12.707	12.446	5.08341	2.19252	-2.89089	0		0.652866	-0.860821	2
0000048_52.tif	control	norm	12.658	13.057	5.08341	2.52692	-2.55648	0		0.752442	-0.761244	2
0000048_52.tif	control	norm	14.356	14.394	5.08341	2.7955	-2.28791	0		0.832416	-0.68127	2
0000048_52.tif	control	norm	14.245	14.05	5.08341	2.47501	-2.6084	0		0.736982	-0.776704	2
0000048_52.tif	control	norm	14.297	13.939	5.08341	2.35602	-2.72738	0		0.701553	-0.812133	2
0000048_52.tif	control	norm	15.425	14.373	5.08341	2.83209	-2.25132	0		0.843311	-0.670375	2
0000048_52.tif	control	norm	15.168	14.13	5.08341	2.5413	-2.54211	0		0.756723	-0.756963	2
0000048_52.tif	control	norm	16.155	12.63	5.08341	1.73558	-3.34782	0		0.516805	-0.996882	2
0000048_52.tif	control	norm	15.189	9.991	5.08341	1.69457	-3.38884	0		0.504591	-1.0091	2
0000048_52.tif	control	norm	14.595	10.043	5.08341	1.58863	-3.49478	0		0.473047	-1.04064	2
0000048_52.tif	control	norm	14.54	9.602	5.08341	2.03286	-3.05055	0		0.605325	-0.908361	2
0000048_52.tif	control	norm	14.894	9.432	5.08341	2.1984	-2.88501	0		0.654618	-0.859069	2
0000048_52.tif	control	norm	15.009	8.707	5.08341	2.93037	-2.15303	0		0.872577	-0.641109	2
0000048_52.tif	control	norm	15.453	8.193	5.08341	3.50528	-1.57813	0		1.04377	-0.469919	2
0000048_52.tif	control	norm	16.925	8.04	5.08341	4.19839	-0.885021	0		1.25015	-0.263533	2
0000048_52.tif	control	norm	16.523	8.727	5.08341	3.40257	-1.68084	0		1.01318	-0.500503	2
0000048_52.tif	control	norm	16.634	8.689	5.08341	3.4939	-1.58951	0		1.04038	-0.473308	2
0000048_52.tif	control	norm	17.095	12.175	5.08341	2.41837	-2.66504	0		0.720119	-0.793568	2
0000048_52.tif	control	norm	17.352	13.484	5.08341	3.206	-1.87741	0		0.95465	-0.559036	2
0000048_52.tif	control	norm	18.061	13.384	5.08341	3.75807	-1.32533	0		1.11904	-0.394645	2
0000048_52.tif	control	norm	19.46	12.686	5.08341	4.83778	-0.245627	0		1.44055	-0.0731404	2
0000048_52.tif	control	norm	20.009	11.55	5.08341	5.26953	0.186126	1		1.56911	0.0554228	2
0000048_52.tif	control	norm	19.96	11.418	5.08341	5.2241	0.140695	1		1.55558	0.0418948	2
0000048_96.tif	predator	norm	6.26	10.01	5.23445	6.87996	1.64551	1		2.04864	0.489982	3
0000048_96.tif	predator	norm	3.686	14.311	5.23445	10.2295	4.99501	1		3.04603	1.48736	3
0000048_96.tif	predator	norm	10.099	14.179	5.23445	4.85998	-0.374476	0		1.44715	-0.111508	3
0000048_96.tif	predator	norm	9.752	13.016	5.23445	4.28478	-0.949666	0		1.27588	-0.282782	3
0000048_96.tif	predator	norm	9.703	12.863	5.23445	4.23198	-1.00248	0		1.26016	-0.298507	3
0000048_96.tif	predator	norm	6.842	11.453	5.23445	6.37889	1.14444	1		1.89944	0.34078	3
0000048_96.tif	predator	norm	8.418	11.724	5.23445	4.89993	-0.334525	0		1.45905	-0.0996114	3
0000048_96.tif	predator	norm	8.481	11.849	5.23445	4.87557	-0.358883	0		1.4518	-0.106865	3
0000048_96.tif	predator	norm	8.8	12.502	5.23445	4.82201	-0.412441	0		1.43585	-0.122812	3
0000048_96.tif	predator	norm	8.384	11.307	5.23445	4.83568	-0.398767	0		1.43992	-0.118741	3
0000048_96.tif	predator	norm	8.328	11.203	5.23445	4.87202	-0.362436	0		1.45074	-0.107923	3
0000048_96.tif	predator	norm	9.571	10.137	5.23445	3.56729	-1.66717	0		1.06223	-0.496432	3
0000048_96.tif	predator	norm	10.703	10.227	5.23445	2.43182	-2.80263	0		0.724122	-0.83454	3
0000048_96.tif	predator	norm	8.87	8.911	5.23445	4.50617	-0.728282	0		1.3418	-0.21686	3
0000048_96.tif	predator	norm	9.877	7.609	5.23445	4.27322	-0.961226	0		1.27244	-0.286224	3
0000048_96.tif	predator	norm	15.738	4.734	5.23445	6.21924	0.984792	1		1.8519	0.293241	3
0000048_96.tif	predator	norm	15.571	4.804	5.23445	6.08689	0.852441	1		1.81249	0.253831	3
0000048_96.tif	predator	norm	14.217	5.477	5.23445	5.02205	-0.212402	0		1.49542	-0.0632469	3
0000048_96.tif	predator	norm	14.328	5.554	5.23445	4.97247	-0.261979	0		1.48065	-0.0780095	3
0000048_96.tif	predator	norm	15.474	6.443	5.23445	4.58195	-0.652497	0		1.36437	-0.194294	3
0000048_96.tif	predator	norm	14.446	6.873	5.23445	3.74578	-1.48867	0		1.11538	-0.44328	3
0000048_96.tif	predator	norm	15.293	8.394	5.23445	2.93645	-2.298	0		0.874388	-0.684274	3
0000048_96.tif	predator	norm	15.634	8.443	5.23445	3.16575	-2.0687	0		0.942666	-0.615997	3
0000048_96.tif	predator	norm	15.627	8.609	5.23445	3.06128	-2.17317	0		0.911558	-0.647104	3
0000048_96.tif	predator	norm	15.78	8.533	5.23445	3.23016	-2.00429	0		0.961844	-0.596819	3
0000048_96.tif	predator	norm	14.821	10.679	5.23445	1.71723	-3.51722	0		0.51134	-1.04732	3
0000048_96.tif	predator	norm	14.3	11.63	5.23445	1.71213	-3.52232	0		0.509822	-1.04884	3
0000048_96.tif	predator	norm	15.502	12.491	5.23445	3.17533	-2.05912	0		0.945517	-0.613145	3
0000048_96.tif	predator	norm	15.898	12.811	5.23445	3.68396	-1.55049	0		1.09697	-0.461689	3
0000048_96.tif	predator	norm	14.543	14.019	5.23445	3.9037	-1.33075	0		1.16241	-0.396257	3
0000048_96.tif	predator	norm	13.523	14.714	5.23445	4.35178	-0.882669	0		1.29583	-0.262832	3
0000048_96.tif	predator	norm	13.259	15.068	5.23445	4.68977	-0.544677	0		1.39647	-0.162188	3
0000048_96.tif	predator	norm	12.641	14.943	5.23445	4.58913	-0.645324	0		1.3665	-0.192158	3
0000048_96.tif	predator	norm	12.135	14.859	5.23445	4.58819	-0.646263	0		1.36622	-0.192438	3
0000048_96.tif	predator	norm	12.943	16.01	5.23445	5.6331	0.398654	1		1.67737	0.118707	3
0000048_96.tif	predator	norm	13.5	15.609	5.23445	5.24207	0.00762301	1		1.56093	0.0022699	3
0000048_96.tif	predator	norm	13.875	15.542	5.23445	5.21548	-0.0189675	0		1.55301	-0.00564796	3
0000048_96.tif	predator	norm	16.568	20.727	5.23445	10.9032	5.66877	1		3.24665	1.68799	3
0000048_96.tif	predator	norm	16.707	20.72	5.23445	10.9412	5.70678	1		3.25797	1.69931	3
0000048_96.tif	predator	norm	16.245	14.354	5.23445	5.04935	-0.185105	0		1.50354	-0.0551186	3
0000048_96.tif	predator	norm	16.276	13.089	5.23445	4.15163	-1.08283	0		1.23623	-0.322433	3
0000048_96.tif	predator	norm	16.38	10.292	5.23445	3.25119	-1.98326	0		0.968107	-0.590555	3
0000048_96.tif	predator	norm	16.208	10.255	5.23445	3.08054	-2.15391	0		0.917292	-0.641371	3
0000048_96.tif	predator	norm	17.589	9.693	5.23445	4.51161	-0.722838	0		1.34342	-0.21524	3
0000048_96.tif	predator	norm	17.505	9.615	5.23445	4.44138	-0.793072	0		1.32251	-0.236153	3
0000048_96.tif	predator	norm	17.839	10.099	5.23445	4.71738	-0.517075	0		1.40469	-0.153969	3
0000048_96.tif	predator	norm	21.422	15.797	5.23445	9.9046	4.67015	1		2.94929	1.39063	3
0000064_24.tif	predator	norm	12.089	12.38	5.08341	2.36515	-2.71826	0		0.70427	-0.809416	1
0000064_24.tif	predator	norm	12.339	9.318	5.08341	2.18713	-2.89628	0		0.651262	-0.862424	1
0000064_24.tif	predator	norm	13.188	7.354	5.08341	3.57089	-1.51252	0		1.0633	-0.450382	1
0000064_24.tif	predator	norm	15.109	7	5.08341	4.04038	-1.04303	0		1.2031	-0.310582	1
0000064_24.tif	predator	norm	14.635	7.016	5.08341	3.9085	-1.17491	0		1.16383	-0.349853	1
0000064_24.tif	predator	norm	14.875	7.188	5.08341	3.79447	-1.28894	0		1.12988	-0.383807	1
0000064_24.tif	predator	norm	14.755	7.573	5.08341	3.39158	-1.69182	0		1.00991	-0.503774	1
0000064_24.tif	predator	norm	14.901	7.927	5.08341	3.09473	-1.98868	0		0.921518	-0.592169	1
0000064_24.tif	predator	norm	14.714	8.323	5.08341	2.6599	-2.4235	0		0.792039	-0.721647	1
0000064_24.tif	predator	norm	17.609	14.099	5.08341	4.93117	-0.152242	0		1.46835	-0.0453331	1
0000064_24.tif	predator	norm	16.297	12.01	5.08341	2.6648	-2.41861	0		0.793496	-0.72019	1
0000064_24.tif	predator	norm	16.922	12.552	5.08341	3.46985	-1.61355	0		1.03322	-0.480468	1
0000064_24.tif	predator	norm	17.286	12.427	5.08341	3.73717	-1.34624	0		1.11282	-0.40087	1
0000064_24.tif	predator	norm	18.151	12.505	5.08341	4.56408	-0.519328	0		1.35905	-0.15464	1
0000064_24.tif	predator	norm	18.109	12.38	5.08341	4.48085	-0.602554	0		1.33426	-0.179423	1
0000067_30.tif	predator	norm	12.719	5.396	5.1354	7.2117	2.0763	1		2.14743	0.61826	2
0000067_30.tif	predator	norm	11.365	9.182	5.1354	4.54137	-0.594021	0		1.35229	-0.176882	2
0000067_30.tif	predator	norm	12.099	8.943	5.1354	4.23853	-0.896861	0		1.26211	-0.267058	2
0000067_30.tif	predator	norm	12.677	8.12	5.1354	4.65646	-0.478938	0		1.38655	-0.142613	2
0000067_30.tif	predator	norm	12.958	8.016	5.1354	4.64369	-0.491702	0		1.38275	-0.146414	2
0000067_30.tif	predator	norm	13.255	7.677	5.1354	4.87072	-0.264674	0		1.45035	-0.0788121	2
0000067_30.tif	predator	norm	14.818	8.036	5.1354	4.32277	-0.812627	0		1.28719	-0.241976	2
0000067_30.tif	predator	norm	14.25	12.354	5.1354	0.365	-4.7704	0		0.108686	-1.42048	2
0000067_30.tif	predator	norm	12.583	13.859	5.1354	2.52865	-2.60675	0		0.752955	-0.776212	2
0000067_30.tif	predator	norm	13.812	14.047	5.1354	1.87378	-3.26161	0		0.557956	-0.971211	2
0000067_30.tif	predator	norm	14.245	16.8	5.1354	4.46137	-0.674027	0		1.32846	-0.200705	2
0000067_30.tif	predator	norm	16.766	16.377	5.1354	4.56194	-0.573452	0		1.35841	-0.170757	2
0000067_30.tif	predator	norm	19.016	10.974	5.1354	4.61229	-0.523108	0		1.3734	-0.155766	2
0000067_30.tif	predator	norm	19.175	10.766	5.1354	4.8286	-0.3068	0		1.43781	-0.0913557	2
0000067_30.tif	predator	norm	19.203	10.849	5.1354	4.82854	-0.306859	0		1.43779	-0.0913734	2
0000067_30.tif	predator	norm	18.425	10.53	5.1354	4.22411	-0.911289	0		1.25781	-0.271355	2
0000067_30.tif	predator	norm	17.627	9.592	5.1354	4.08666	-1.04874	0		1.21688	-0.312282	2
0000067_30.tif	predator	norm	18.141	9.189	5.1354	4.73813	-0.397263	0		1.41087	-0.118293	2
0000067_30.tif	predator	norm	16.818	8.443	5.1354	4.48878	-0.646618	0		1.33662	-0.192543	2
0000069_82.tif	control	norm	10.385	7.995	5.03648	4.24198	-0.794494	0		1.26314	-0.236576	3
0000069_82.tif	control	norm	9.755	9.255	5.03648	3.85236	-1.18412	0		1.14712	-0.352596	3
0000069_82.tif	control	norm	9.781	9.38	5.03648	3.76397	-1.27251	0		1.1208	-0.378915	3
0000069_82.tif	control	norm	10.182	11.536	5.03648	2.81989	-2.21659	0		0.839679	-0.660034	3
0000069_82.tif	control	norm	10.5	11.583	5.03648	2.5069	-2.52958	0		0.74648	-0.753232	3
0000069_82.tif	control	norm	10.526	11.349	5.03648	2.46902	-2.56746	0		0.7352	-0.764512	3
0000069_82.tif	control	norm	10.651	11.865	5.03648	2.40229	-2.63419	0		0.715331	-0.784381	3
0000069_82.tif	control	norm	10.375	11.995	5.03648	2.70088	-2.3356	0		0.80424	-0.695472	3
0000069_82.tif	control	norm	10.422	12.073	5.03648	2.67565	-2.36083	0		0.796727	-0.702985	3
0000069_82.tif	control	norm	10.375	12.995	5.03648	3.09947	-1.937	0		0.92293	-0.576782	3
0000069_82.tif	control	norm	10.604	13.453	5.03648	3.19153	-1.84495	0		0.950343	-0.54937	3
0000069_82.tif	control	norm	11.906	13.823	5.03648	2.71223	-2.32425	0		0.80762	-0.692092	3
0000069_82.tif	control	norm	11.969	13.812	5.03648	2.67739	-2.35909	0		0.797246	-0.702466	3
0000069_82.tif	control	norm	13.391	12.969	5.03648	1.67741	-3.35906	0		0.499483	-1.00023	3
0000069_82.tif	control	norm	12.464	12.62	5.03648	1.38669	-3.64978	0		0.412916	-1.0868	3
0000069_82.tif	control	norm	11.125	12.141	5.03648	2.03472	-3.00175	0		0.60588	-0.893832	3
0000069_82.tif	control	norm	11.286	12.25	5.03648	1.93665	-3.09983	0		0.576675	-0.923037	3
0000069_82.tif	control	norm	11.667	11.625	5.03648	1.35845	-3.67803	0		0.404505	-1.09521	3
0000069_82.tif	control	norm	12.234	11.906	5.03648	0.949005	-4.08747	0		0.282585	-1.21713	3
0000069_82.tif	control	norm	12.38	11.823	5.03648	0.782612	-4.25387	0		0.233038	-1.26667	3
0000069_82.tif	control	norm	13.12	11.682	5.03648	0.365067	-4.67141	0		0.108706	-1.39101	3
0000069_82.tif	control	norm	13.661	11.88	5.03648	0.858043	-4.17844	0		0.255499	-1.24421	3
0000069_82.tif	control	norm	13.807	11.76	5.03648	0.91465	-4.12183	0		0.272355	-1.22736	3
0000069_82.tif	control	norm	13.901	11.766	5.03648	1.00158	-4.0349	0		0.298241	-1.20147	3
0000069_82.tif	control	norm	12.51	11.047	5.03648	0.566117	-4.47036	0		0.168573	-1.33114	3
0000069_82.tif	control	norm	11.865	10.99	5.03648	1.18267	-3.85381	0		0.352163	-1.14755	3
0000069_82.tif	control	norm	10.807	10.583	5.03648	2.31493	-2.72155	0		0.689315	-0.810397	3
0000069_82.tif	control	norm	10.87	10.573	5.03648	2.25885	-2.77763	0		0.672616	-0.827096	3
0000069_82.tif	control	norm	10.755	9.891	5.03648	2.66727	-2.36921	0		0.794232	-0.705481	3
0000069_82.tif	control	norm	14.104	10.427	5.03648	1.43584	-3.60064	0		0.427549	-1.07216	3
0000069_82.tif	control	norm	11.406	9.417	5.03648	2.49379	-2.54269	0		0.742577	-0.757135	3
0000069_82.tif	control	norm	12.052	7.141	5.03648	4.30261	-0.733868	0		1.28119	-0.218524	3
0000069_82.tif	control	norm	12.172	7.161	5.03648	4.25829	-0.778191	0		1.26799	-0.231722	3
0000069_82.tif	control	norm	12.219	7.266	5.03648	4.14626	-0.890214	0		1.23463	-0.265079	3
0000069_82.tif	control	norm	12.995	7.953	5.03648	3.386	-1.65048	0		1.00825	-0.491463	3
0000069_82.tif	control	norm	13.599	7.203	5.03648	4.17987	-0.856609	0		1.24464	-0.255072	3
0000069_82.tif	control	norm	13.333	6.865	5.03648	4.48675	-0.549729	0		1.33602	-0.163693	3
0000069_82.tif	control	norm	13.964	6.661	5.03648	4.77731	-0.259173	0		1.42254	-0.077174	3
0000069_82.tif	control	norm	14.771	7.458	5.03648	4.26806	-0.768418	0		1.2709	-0.228812	3
0000069_82.tif	control	norm	14.745	7.536	5.03648	4.18632	-0.850154	0		1.24656	-0.25315	3
0000069_82.tif	control	norm	14.672	7.615	5.03648	4.08418	-0.952301	0		1.21615	-0.283567	3
0000069_82.tif	control	norm	14.797	7.797	5.03648	3.97404	-1.06244	0		1.18335	-0.316363	3
0000069_82.tif	control	norm	15.328	7.958	5.03648	4.1078	-0.928675	0		1.22318	-0.276532	3
0000069_82.tif	control	norm	15.5	8.146	5.03648	4.05836	-0.97812	0		1.20846	-0.291255	3
0000069_82.tif	control	norm	14.677	9.083	5.03648	2.81401	-2.22247	0		0.837928	-0.661784	3
0000069_82.tif	control	norm	15.302	9.573	5.03648	2.90534	-2.13114	0		0.865123	-0.634589	3
0000069_82.tif	control	norm	15.349	9.656	5.03648	2.89375	-2.14273	0		0.861673	-0.638039	3
0000069_82.tif	control	norm	15.438	9.682	5.03648	2.95193	-2.08455	0		0.878997	-0.620716	3
0000069_82.tif	control	norm	15.031	10.266	5.03648	2.30144	-2.73504	0		0.6853	-0.814412	3
0000069_82.tif	control	norm	15.193	10.63	5.03648	2.30952	-2.72696	0		0.687706	-0.812006	3
0000069_82.tif	control	norm	15.255	10.63	5.03648	2.3686	-2.66788	0		0.705299	-0.794413	3
0000069_82.tif	control	norm	14.979	10.734	5.03648	2.07419	-2.96228	0		0.617633	-0.882079	3
0000069_82.tif	control	norm	14.771	11.12	5.03648	1.78945	-3.24703	0		0.532845	-0.966867	3
0000069_82.tif	control	norm	15.359	11.672	5.03648	2.38734	-2.64914	0		0.710878	-0.788834	3
0000069_82.tif	control	norm	14.375	13.438	5.03648	2.51201	-2.52447	0		0.748002	-0.751711	3
0000077_64.tif	predator	norm	8.812	13.615	4.98429	4.62232	-0.361969	0		1.37639	-0.107784	4
0000077_64.tif	predator	norm	9.189	13.477	4.98429	4.22101	-0.76328	0		1.25689	-0.227282	4
0000077_64.tif	predator	norm	9.293	14.325	4.98429	4.46988	-0.514405	0		1.331	-0.153174	4
0000077_64.tif	predator	norm	9.495	14.207	4.98429	4.23598	-0.748305	0		1.26135	-0.222823	4
0000077_64.tif	predator	norm	9.564	14.019	4.98429	4.08614	-0.89815	0		1.21673	-0.267442	4
0000077_64.tif	predator	norm	9.786	13.727	4.98429	3.75806	-1.22622	0		1.11904	-0.365133	4
0000077_64.tif	predator	norm	9.988	13.762	4.98429	3.59161	-1.39268	0		1.06947	-0.414698	4
0000077_64.tif	predator	norm	10.182	13.936	4.98429	3.50545	-1.47884	0		1.04382	-0.440355	4
0000077_64.tif	predator	norm	9.266	12.38	4.98429	3.93427	-1.05002	0		1.17151	-0.312665	4
0000077_64.tif	predator	norm	10.634	15.179	4.98429	3.97214	-1.01214	0		1.18279	-0.301386	4
0000077_64.tif	predator	norm	10.745	15.332	4.98429	4.02184	-0.96245	0		1.19758	-0.286589	4
0000077_64.tif	predator	norm	11.516	14.116	4.98429	2.59094	-2.39335	0		0.771503	-0.712668	4
0000077_64.tif	predator	norm	12.002	14.172	4.98429	2.35445	-2.62984	0		0.701085	-0.783087	4
0000077_64.tif	predator	norm	10.946	12.873	4.98429	2.36323	-2.62106	0		0.703698	-0.780474	4
0000077_64.tif	predator	norm	12.641	12.998	4.98429	1.01939	-3.9649	0		0.303543	-1.18063	4
0000077_64.tif	predator	norm	14.009	16.068	4.98429	4.01088	-0.973405	0		1.19432	-0.289851	4
0000077_64.tif	predator	norm	13.766	14.325	4.98429	2.25792	-2.72637	0		0.67234	-0.811832	4
0000077_64.tif	predator	norm	9.335	9.443	4.98429	4.7078	-0.27649	0		1.40184	-0.0823304	4
0000077_64.tif	predator	norm	9.814	8.984	4.98429	4.62432	-0.359973	0		1.37698	-0.107189	4
0000077_64.tif	predator	norm	10.363	8.637	4.98429	4.5041	-0.480189	0		1.34119	-0.142986	4
0000077_64.tif	predator	norm	10.418	8.45	4.98429	4.6178	-0.366485	0		1.37504	-0.109128	4
0000077_64.tif	predator	norm	11.3	9.248	4.98429	3.4573	-1.52699	0		1.02948	-0.454692	4
0000077_64.tif	predator	norm	11.342	8.366	4.98429	4.20438	-0.779907	0		1.25194	-0.232233	4
0000077_64.tif	predator	norm	11.481	8.366	4.98429	4.14507	-0.839223	0		1.23428	-0.249895	4
0000077_64.tif	predator	norm	10.724	7.7	4.98429	5.08119	0.0968966	1		1.51302	0.0288529	4
0000077_64.tif	predator	norm	12.849	8.609	4.98429	3.54871	-1.43558	0		1.0567	-0.427471	4
0000077_64.tif	predator	norm	13.432	9.026	4.98429	3.12416	-1.86013	0		0.93028	-0.553892	4
0000077_64.tif	predator	norm	13.168	7.651	4.98429	4.49007	-0.494219	0		1.33701	-0.147164	4
0000077_64.tif	predator	norm	14.543	7.075	4.98429	5.24279	0.258502	1		1.56115	0.0769743	4
0000077_64.tif	predator	norm	14.411	8.422	4.98429	3.91337	-1.07092	0		1.16528	-0.318887	4
0000077_64.tif	predator	norm	15.536	8.297	4.98429	4.50178	-0.482513	0		1.34049	-0.143678	4
0000077_64.tif	predator	norm	16.418	8.366	4.98429	4.965	-0.019286	0		1.47843	-0.00574278	4
0000077_64.tif	predator	norm	16.557	9.72	4.98429	4.1446	-0.839685	0		1.23414	-0.250033	4
0000077_64.tif	predator	norm	14.828	9.929	4.98429	2.75067	-2.23362	0		0.819066	-0.665105	4
0000077_64.tif	predator	norm	14.953	9.839	4.98429	2.89772	-2.08656	0		0.862855	-0.621316	4
0000077_64.tif	predator	norm	15.078	9.811	4.98429	2.99702	-1.98727	0		0.892422	-0.591749	4
0000077_64.tif	predator	norm	14.398	9.224	4.98429	3.15609	-1.8282	0		0.939789	-0.544382	4
0000077_64.tif	predator	norm	17.87	12.273	4.98429	4.67886	-0.305426	0		1.39322	-0.0909467	4
0000077_64.tif	predator	norm	17.967	12.467	4.98429	4.78512	-0.199171	0		1.42486	-0.0593071	4
0000077_64.tif	predator	norm	17.405	13.106	4.98429	4.32113	-0.663158	0		1.2867	-0.197469	4
0000077_64.tif	predator	norm	16.46	12.863	4.98429	3.34583	-1.63846	0		0.996288	-0.487884	4
0000077_64.tif	predator	norm	16.62	12.745	4.98429	3.47982	-1.50447	0		1.03619	-0.447986	4
0000077_64.tif	predator	norm	17.488	13.634	4.98429	4.5471	-0.437193	0		1.35399	-0.130183	4
0000077_64.tif	predator	norm	17.189	14.141	4.98429	4.46856	-0.51573	0		1.3306	-0.153569	4
0000077_64.tif	predator	norm	17.273	14.307	4.98429	4.6193	-0.364986	0		1.37549	-0.108682	4
0000077_64.tif	predator	norm	17.175	14.446	4.98429	4.60102	-0.383272	0		1.37004	-0.114127	4
0000077_64.tif	predator	norm	16.307	15.384	4.98429	4.496	-0.488285	0		1.33877	-0.145397	4
0000077_64.tif	predator	norm	16.168	15.231	4.98429	4.28937	-0.694915	0		1.27725	-0.206925	4
0000077_64.tif	predator	norm	15.085	13.085	4.98429	2.11443	-2.86986	0		0.629613	-0.854559	4
0000077_64.tif	predator	norm	14.641	14.016	4.98429	2.36904	-2.61525	0		0.705428	-0.778744	4
0000077_64.tif	predator	norm	14.377	13.293	4.98429	1.65196	-3.33233	0		0.491903	-0.992269	4
0000077_64.tif	predator	norm	14.238	13.231	4.98429	1.51001	-3.47428	0		0.449635	-1.03454	4
0000077_64.tif	predator	norm	14.536	16.925	4.98429	4.96893	-0.0153545	0		1.4796	-0.00457211	4
0000077_64.tif	predator	norm	14.821	16.78	4.98429	4.91637	-0.0679174	0		1.46395	-0.0202238	4
0000077_64.tif	predator	norm	14.918	16.453	4.98429	4.64424	-0.340048	0		1.38292	-0.101256	4
0000077_64.tif	predator	norm	14.585	15.752	4.98429	3.87001	-1.11428	0		1.15237	-0.331798	4
0000077_64.tif	predator	norm	14.703	15.668	4.98429	3.83664	-1.14765	0		1.14244	-0.341734	4
0000081_12.tif	predator	norm	8.844	13.438	5.03648	4.6546	-0.381878	0		1.386	-0.113712	1
0000081_12.tif	predator	norm	8.943	10.717	5.03648	4.4487	-0.587776	0		1.32469	-0.175022	1
0000081_12.tif	predator	norm	10.304	9.342	5.03648	3.88359	-1.15288	0		1.15642	-0.343294	1
0000081_12.tif	predator	norm	16.953	9.877	5.03648	4.22932	-0.807157	0		1.25936	-0.240347	1
0000081_12.tif	predator	norm	16.655	14.498	5.03648	4.30113	-0.735352	0		1.28075	-0.218966	1
0000081_12.tif	predator	norm	15.759	15.741	5.03648	4.60414	-0.432336	0		1.37098	-0.128737	1
0000081_12.tif	predator	norm	14.418	15.845	5.03648	4.12747	-0.909013	0		1.22904	-0.270677	1
0000081_12.tif	predator	norm	13.988	16.415	5.03648	4.5864	-0.450075	0		1.36569	-0.134019	1
0000081_12.tif	predator	norm	14.12	16.644	5.03648	4.83487	-0.201605	0		1.43968	-0.0600318	1
0000081_12.tif	predator	norm	14.21	16.575	5.03648	4.7846	-0.251875	0		1.42471	-0.0750008	1
0000081_12.tif	predator	norm	20.432	10.974	5.03648	7.25618	2.2197	1		2.16067	0.660959	1
0000089_28.tif	predator	norm	11.135	13.083	5.02617	4.90566	-0.120502	0		1.46076	-0.0358819	2
0000089_28.tif	predator	norm	13.203	15.266	5.02617	4.18022	-0.845945	0		1.24474	-0.251897	2
0000089_28.tif	predator	norm	13.918	15.939	5.02617	4.33238	-0.693785	0		1.29005	-0.206588	2
0000089_28.tif	predator	norm	14.46	15.856	5.02617	4.0298	-0.996365	0		1.19995	-0.296688	2
0000089_28.tif	predator	norm	14.849	14.252	5.02617	2.40609	-2.62007	0		0.716462	-0.780179	2
0000089_28.tif	predator	norm	15.981	16.127	5.02617	4.01818	-1.00799	0		1.19649	-0.300148	2
0000089_28.tif	predator	norm	16.099	14.648	5.02617	2.54379	-2.48238	0		0.757464	-0.739178	2
0000089_28.tif	predator	norm	16.432	14.502	5.02617	2.44245	-2.58371	0		0.727289	-0.769353	2
0000089_28.tif	predator	norm	17.439	12.082	5.02617	1.49624	-3.52992	0		0.445536	-1.05111	2
[truncated: 10,605 more rows]
