# Supplementary material for: Dopamine signaling regulates predator-driven changes in Caenorhabditis elegans’ egg laying behavior
Source: eLife. 2023 Jul 11;12:e83957. doi: 10.7554/eLife.83957 (PMC10335835; doi:10.7554/eLife.83957)
Supplement: Figure 4—source data 3. — Slopes showing the model estimates for temporal change per hour in mean distance from center (mm/hr) and coefficient of variation (units/hr) in Figure 4b and c in predator-exposed and control conditions. [file elife-83957-fig4-data3.xlsx]

## Sheet: Figure 4-source data 3
Exposure	Parameter	Slope	Slope units	Std. Error	95% CI		p (slope=0)
Mock	Mean Distance from Center	-0.0654956	mm/hr	0.020234	-0.10563	-0.0253617	0.00163018
Predator	Mean Distance from Center	-0.0743129	mm/hr	0.019807	-0.1136	-0.0350259	0.000291793
Mock	Coefficient of Variation	0.0169322	units/hr	0.00757631	0.00190468	0.0319598	0.027605
Predator	Coefficient of Variation	0.0173517	units/hr	0.00741643	0.00264129	0.0320622	0.0212508
