# Supplementary material for: Dopamine signaling regulates predator-driven changes in Caenorhabditis elegans’ egg laying behavior
Source: eLife. 2023 Jul 11;12:e83957. doi: 10.7554/eLife.83957 (PMC10335835; doi:10.7554/eLife.83957)
Supplement: Figure 4—source data 4. — Slopes showing the model estimates for temporal change per hour in log odds ratio (logp(off)1−p(off)) from logistic models in Figure 4d in different conditions. On logit scale, a slope of +0.1 = 1.1-fold, 0.22=1.25-fold, +0.4 = 1.5-fold, +0.69 = 2-fold change in the P(off)/P(on) odds ratio. [file elife-83957-fig4-data4.xlsx]

## Sheet: Sheet1
Exposure	Lawn Type	Slope	Units	Std. Error	95% C.I.		p (slope=0)
Mock	Small lawn	-0.323264	change in log odds ratio/hr	0.0859619	-0.491746	-0.154782	0.00016954
Mock	Artificially streaked	0.239299	change in log odds ratio/hr	0.0289464	0.182565	0.296033	2.22045e-16
Predator	Small lawn	0.0740686	change in log odds ratio/hr	0.0372991	0.00096379	0.147173	0.0470551
Predator	Artificially streaked	0.101783	change in log odds ratio/hr	0.024731	0.0533108	0.150255	3.86188e-05
