# Supplementary material for: Dopamine signaling regulates predator-driven changes in Caenorhabditis elegans’ egg laying behavior
Source: eLife. 2023 Jul 11;12:e83957. doi: 10.7554/eLife.83957 (PMC10335835; doi:10.7554/eLife.83957)
Supplement: Figure 5—source data 1. — For each test arena, data tabulate the arena, predator exposure condition, rest period, <x,y> coordinates in pixels, lawn radius in pixels, the egg distance from arena center in pixels, the egg distance from lawn edge in pixels, position as 1 (off) or 0 (on) lawn, the conversion factor for pixel data in mm-per-pixel, the calculated distance from center in mm, the calculated distance from the lawn edge in mm. [file elife-83957-fig5-data1.xlsx]

## Sheet: Figure5B-C
Arena	Condition	RestPeriod	X	Y	LawnRadius	DistCenterPx	DistEdgePx	off	PxScale	DistCenterMm	DistEdgeMm
0000006_14.tif	predator	1HR	3.792	9.312	4.88567	10.1085	5.22286	1	0.29777	3.01001	1.55521
0000006_14.tif	predator	1HR	4.675	9.245	4.88567	9.26906	4.38339	1	0.29777	2.76005	1.30524
0000006_14.tif	predator	1HR	5.786	9.328	4.88567	8.17738	3.29171	1	0.29777	2.43498	0.980173
0000006_14.tif	predator	1HR	5.3	9.932	4.88567	8.50164	3.61597	1	0.29777	2.53153	1.07673
0000006_14.tif	predator	1HR	6.168	11.099	4.88567	7.47777	2.59211	1	0.29777	2.22666	0.771852
0000006_14.tif	predator	1HR	3.96	9.988	4.88567	9.80788	4.92221	1	0.29777	2.92049	1.46569
0000006_14.tif	predator	1HR	9.877	19.905	4.88567	9.06055	4.17488	1	0.29777	2.69796	1.24315
0000006_14.tif	predator	1HR	7.495	18.432	4.88567	9.13735	4.25168	1	0.29777	2.72083	1.26602
0000006_14.tif	predator	1HR	10.467	14.12	4.88567	4.00553	-0.880138	0	0.29777	1.19273	-0.262079
0000006_14.tif	predator	1HR	8.009	12.828	4.88567	5.73699	0.851322	1	0.29777	1.7083	0.253498
0000006_14.tif	predator	1HR	13.248	2.675	4.88567	8.98891	4.10324	1	0.29777	2.67663	1.22182
0000006_14.tif	predator	1HR	14.151	1.613	4.88567	10.0568	5.1711	1	0.29777	2.9946	1.5398
0000006_14.tif	predator	1HR	13.974	5.939	4.88567	5.72764	0.841976	1	0.29777	1.70552	0.250715
0000006_14.tif	predator	1HR	13.071	7.141	4.88567	4.54886	-0.336805	0	0.29777	1.35451	-0.100291
0000006_14.tif	predator	1HR	13.057	8.05	4.88567	3.65046	-1.23521	0	0.29777	1.087	-0.367807
0000006_14.tif	predator	1HR	14.064	12.908	4.88567	1.32673	-3.55893	0	0.29777	0.395062	-1.05974
0000006_14.tif	predator	1HR	14.036	13.019	4.88567	1.42362	-3.46205	0	0.29777	0.423911	-1.03089
0000006_14.tif	predator	1HR	12.144	20.703	4.88567	9.16742	4.28175	1	0.29777	2.72978	1.27498
0000006_14.tif	predator	1HR	13.394	19.911	4.88567	8.25823	3.37256	1	0.29777	2.45905	1.00425
0000006_14.tif	predator	1HR	13.755	19.898	4.88567	8.24303	3.35736	1	0.29777	2.45453	0.999721
0000006_14.tif	predator	1HR	18.009	19.464	4.88567	8.95457	4.0689	1	0.29777	2.6664	1.2116
0000006_14.tif	predator	1HR	15.877	13.627	4.88567	2.99272	-1.89295	0	0.29777	0.891141	-0.563664
0000006_14.tif	predator	1HR	17.911	12.557	4.88567	4.37968	-0.505987	0	0.29777	1.30414	-0.150668
0000006_14.tif	predator	1HR	14.384	7.717	4.88567	4.01146	-0.874208	0	0.29777	1.19449	-0.260313
0000006_14.tif	predator	1HR	14.911	6.016	4.88567	5.78476	0.899089	1	0.29777	1.72253	0.267722
0000006_14.tif	predator	1HR	21.2	4.887	4.88567	10.1587	5.27307	1	0.29777	3.02497	1.57016
0000006_14.tif	predator	1HR	21.672	5.727	4.88567	9.99536	5.10969	1	0.29777	2.97632	1.52151
0000006_14.tif	predator	1HR	21.693	5.866	4.88567	9.9306	5.04493	1	0.29777	2.95703	1.50223
0000006_14.tif	predator	1HR	21.679	6.012	4.88567	9.83472	4.94905	1	0.29777	2.92848	1.47368
0000006_14.tif	predator	1HR	21.095	7.172	4.88567	8.71247	3.8268	1	0.29777	2.59431	1.13951
0000006_14.tif	predator	1HR	21.345	6.943	4.88567	9.04493	4.15926	1	0.29777	2.69331	1.2385
0000006_14.tif	predator	1HR	21.165	6.727	4.88567	9.00814	4.12248	1	0.29777	2.68235	1.22755
0000006_14.tif	predator	1HR	20.019	18.786	4.88567	9.57706	4.6914	1	0.29777	2.85176	1.39696
0000006_14.tif	predator	1HR	21.137	18.523	4.88567	10.1777	5.29205	1	0.29777	3.03062	1.57581
0000019_10.tif	predator	1HR	5.688	10.031	5.10415	8.90063	3.79648	1	0.29777	2.65034	1.13048
0000019_10.tif	predator	1HR	6.792	10.557	5.10415	7.77169	2.66753	1	0.29777	2.31418	0.794312
0000019_10.tif	predator	1HR	8.677	17.057	5.10415	8.6489	3.54475	1	0.29777	2.57538	1.05552
0000019_10.tif	predator	1HR	8.771	17.12	5.10415	8.63183	3.52768	1	0.29777	2.5703	1.05044
0000019_10.tif	predator	1HR	12.927	19.198	5.10415	8.6352	3.53104	1	0.29777	2.5713	1.05144
0000019_10.tif	predator	1HR	9.698	17.516	5.10415	8.35809	3.25394	1	0.29777	2.48879	0.968925
0000019_10.tif	predator	1HR	10.068	16.333	5.10415	7.19118	2.08702	1	0.29777	2.14132	0.621453
0000019_10.tif	predator	1HR	12.583	13.719	5.10415	3.59395	-1.51021	0	0.29777	1.07017	-0.449695
0000019_10.tif	predator	1HR	11.229	12.771	5.10415	3.91403	-1.19013	0	0.29777	1.16548	-0.354385
0000019_10.tif	predator	1HR	9.755	10.719	5.10415	4.807	-0.297154	0	0.29777	1.43138	-0.0884836
0000019_10.tif	predator	1HR	16.578	1.349	5.10415	9.58442	4.48027	1	0.29777	2.85395	1.33409
0000019_10.tif	predator	1HR	13.542	12.708	5.10415	2.23529	-2.86886	0	0.29777	0.665602	-0.854262
0000019_10.tif	predator	1HR	13.391	13.938	5.10415	3.42538	-1.67878	0	0.29777	1.01997	-0.49989
0000019_10.tif	predator	1HR	16.5	14.229	5.10415	4.00948	-1.09467	0	0.29777	1.1939	-0.325961
0000019_10.tif	predator	1HR	20.26	13.333	5.10415	6.26899	1.16483	1	0.29777	1.86672	0.346852
0000019_10.tif	predator	1HR	17.458	11.698	5.10415	3.057	-2.04715	0	0.29777	0.910283	-0.609581
0000019_10.tif	predator	1HR	16.995	11.615	5.10415	2.59274	-2.51141	0	0.29777	0.77204	-0.747824
0000019_10.tif	predator	1HR	19.474	10.714	5.10415	4.912	-0.192152	0	0.29777	1.46265	-0.057217
0000019_10.tif	predator	1HR	19.552	9.948	5.10415	5.04921	-0.0549424	0	0.29777	1.5035	-0.0163602
0000019_10.tif	predator	1HR	17.786	5.833	5.10415	5.85382	0.749663	1	0.29777	1.74309	0.223227
0000019_10.tif	predator	1HR	17.25	5.042	5.10415	6.28122	1.17706	1	0.29777	1.87036	0.350494
0000019_10.tif	predator	1HR	19.911	4.448	5.10415	8.24241	3.13825	1	0.29777	2.45434	0.934477
0000019_10.tif	predator	1HR	18.594	3.62	5.10415	8.16412	3.05996	1	0.29777	2.43103	0.911165
0000019_10.tif	predator	1HR	18.031	2.266	5.10415	9.13713	4.03298	1	0.29777	2.72076	1.2009
0000019_10.tif	predator	1HR	21.115	4.594	5.10415	8.96981	3.86565	1	0.29777	2.67094	1.15108
0000019_10.tif	predator	1HR	21.203	5.714	5.10415	8.31582	3.21167	1	0.29777	2.4762	0.956338
0000019_10.tif	predator	1HR	20.359	9.354	5.10415	5.95554	0.851384	1	0.29777	1.77338	0.253517
0000019_10.tif	predator	1HR	21.604	14.422	5.10415	7.95625	2.8521	1	0.29777	2.36913	0.84927
0000019_10.tif	predator	1HR	22.12	14.625	5.10415	8.50766	3.4035	1	0.29777	2.53332	1.01346
0000019_10.tif	predator	1HR	22.208	14.917	5.10415	8.72264	3.61849	1	0.29777	2.59734	1.07748
0000019_10.tif	predator	1HR	23.328	15.099	5.10415	9.79934	4.69519	1	0.29777	2.91795	1.39809
0000019_10.tif	predator	1HR	23.391	14.896	5.10415	9.76722	4.66306	1	0.29777	2.90838	1.38852
00000031_6.tif	control	1HR	6.089	7.927	4.99475	5.92822	0.933471	1	0.29777	1.76525	0.27796
00000031_6.tif	control	1HR	6.214	8.021	4.99475	5.7748	0.780047	1	0.29777	1.71956	0.232275
00000031_6.tif	control	1HR	6.979	8.323	4.99475	4.95474	-0.040006	0	0.29777	1.47537	-0.0119126
00000031_6.tif	control	1HR	10.354	11.672	4.99475	1.57384	-3.42091	0	0.29777	0.468641	-1.01865
00000031_6.tif	control	1HR	10.297	11.604	4.99475	1.56505	-3.4297	0	0.29777	0.466024	-1.02126
00000031_6.tif	control	1HR	10.406	11.505	4.99475	1.41788	-3.57687	0	0.29777	0.422201	-1.06509
00000031_6.tif	control	1HR	10.276	10.297	4.99475	1.16674	-3.82801	0	0.29777	0.34742	-1.13987
00000031_6.tif	control	1HR	8.281	7.5	4.99475	4.35455	-0.640197	0	0.29777	1.29666	-0.190632
00000031_6.tif	control	1HR	8.177	7.427	4.99475	4.48017	-0.514578	0	0.29777	1.33406	-0.153226
00000031_6.tif	control	1HR	9.927	6.875	4.99475	3.93598	-1.05878	0	0.29777	1.17202	-0.315271
00000031_6.tif	control	1HR	11.297	7.073	4.99475	3.44527	-1.54948	0	0.29777	1.0259	-0.461389
00000031_6.tif	control	1HR	11.349	6.99	4.99475	3.52676	-1.468	0	0.29777	1.05016	-0.437125
00000031_6.tif	control	1HR	12.865	7.432	4.99475	3.40489	-1.58986	0	0.29777	1.01388	-0.473412
00000031_6.tif	control	1HR	12.906	7.464	4.99475	3.39366	-1.60109	0	0.29777	1.01053	-0.476755
00000031_6.tif	control	1HR	13.552	7.792	4.99475	3.4579	-1.53685	0	0.29777	1.02966	-0.457628
00000031_6.tif	control	1HR	12.208	11.115	4.99475	0.988229	-4.00652	0	0.29777	0.294265	-1.19302
00000031_6.tif	control	1HR	11.849	11.99	4.99475	1.5346	-3.46015	0	0.29777	0.456959	-1.03033
00000031_6.tif	control	1HR	11.74	12.089	4.99475	1.60482	-3.38993	0	0.29777	0.477868	-1.00942
00000031_6.tif	control	1HR	12.349	12.557	4.99475	2.24165	-2.7531	0	0.29777	0.667497	-0.81979
00000031_6.tif	control	1HR	11.396	13.76	4.99475	3.2441	-1.75065	0	0.29777	0.965997	-0.52129
00000031_6.tif	control	1HR	11.406	13.911	4.99475	3.39504	-1.59971	0	0.29777	1.01094	-0.476347
00000031_6.tif	control	1HR	11.646	14	4.99475	3.49119	-1.50356	0	0.29777	1.03957	-0.447714
00000031_6.tif	control	1HR	12.828	15.047	4.99475	4.74413	-0.250618	0	0.29777	1.41266	-0.0746265
00000031_6.tif	control	1HR	12.807	15.234	4.99475	4.91709	-0.0776635	0	0.29777	1.46416	-0.0231259
00000031_6.tif	control	1HR	14.057	13.974	4.99475	4.34753	-0.647224	0	0.29777	1.29456	-0.192724
00000031_6.tif	control	1HR	13.948	13.958	4.99475	4.26943	-0.72532	0	0.29777	1.27131	-0.215979
00000031_6.tif	control	1HR	14.969	19.354	4.99475	9.52321	4.52846	1	0.29777	2.83573	1.34844
00000031_6.tif	control	1HR	15.677	19.234	4.99475	9.70096	4.70621	1	0.29777	2.88865	1.40137
00000031_6.tif	control	1HR	15.797	19.349	4.99475	9.8571	4.86235	1	0.29777	2.93515	1.44786
00000031_6.tif	control	1HR	15.875	19.333	4.99475	9.87769	4.88294	1	0.29777	2.94128	1.45399
00000031_6.tif	control	1HR	16.031	19.229	4.99475	9.85694	4.86219	1	0.29777	2.9351	1.44781
00000031_6.tif	control	1HR	15.562	16.76	4.99475	7.4918	2.49705	1	0.29777	2.23083	0.743548
00000031_6.tif	control	1HR	15.708	16.781	4.99475	7.59079	2.59603	1	0.29777	2.26031	0.773021
00000031_6.tif	control	1HR	16.25	17.193	4.99475	8.23965	3.2449	1	0.29777	2.45352	0.966235
00000031_6.tif	control	1HR	14.417	13.573	4.99475	4.27963	-0.715116	0	0.29777	1.27435	-0.21294
00000031_6.tif	control	1HR	14.526	13.677	4.99475	4.43021	-0.564544	0	0.29777	1.31918	-0.168104
00000031_6.tif	control	1HR	14.771	13.094	4.99475	4.22633	-0.768419	0	0.29777	1.25847	-0.228812
00000031_6.tif	control	1HR	14.828	13.026	4.99475	4.23095	-0.763801	0	0.29777	1.25985	-0.227437
00000031_6.tif	control	1HR	17.401	12.542	4.99475	6.31293	1.31818	1	0.29777	1.8798	0.392515
00000031_6.tif	control	1HR	17.229	12.411	4.99475	6.10838	1.11363	1	0.29777	1.81889	0.331605
00000031_6.tif	control	1HR	14.432	11.589	4.99475	3.19553	-1.79922	0	0.29777	0.951534	-0.535753
00000031_6.tif	control	1HR	15.411	11.432	4.99475	4.09282	-0.901931	0	0.29777	1.21872	-0.268568
00000031_6.tif	control	1HR	15.365	11.25	4.99475	4.01074	-0.984015	0	0.29777	1.19428	-0.29301
00000031_6.tif	control	1HR	15.208	10.807	4.99475	3.79717	-1.19758	0	0.29777	1.13068	-0.356605
00000031_6.tif	control	1HR	15.156	10.099	4.99475	3.75721	-1.23754	0	0.29777	1.11879	-0.368502
00000031_6.tif	control	1HR	14.812	9.849	4.99475	3.45499	-1.53976	0	0.29777	1.02879	-0.458493
00000031_6.tif	control	1HR	14.599	9.812	4.99475	3.25407	-1.74069	0	0.29777	0.968963	-0.518324
00000031_6.tif	control	1HR	14.37	8.302	4.99475	3.6868	-1.30795	0	0.29777	1.09782	-0.389468
00000031_6.tif	control	1HR	14.365	8.229	4.99475	3.72715	-1.2676	0	0.29777	1.10983	-0.377455
00000033_2.tif	control	1HR	6.37	4.505	5.27621	8.80408	3.52786	1	0.29777	2.62159	1.05049
00000033_2.tif	control	1HR	6.396	5.203	5.27621	8.36867	3.09245	1	0.29777	2.49194	0.92084
00000033_2.tif	control	1HR	6.74	5.323	5.27621	8.01792	2.74171	1	0.29777	2.3875	0.816398
00000033_2.tif	control	1HR	10.932	13.562	5.27621	4.30885	-0.967362	0	0.29777	1.28305	-0.288051
00000033_2.tif	control	1HR	11.01	13.557	5.27621	4.26251	-1.0137	0	0.29777	1.26925	-0.30185
00000033_2.tif	control	1HR	9.542	12.917	5.27621	4.77523	-0.500982	0	0.29777	1.42192	-0.149177
00000033_2.tif	control	1HR	9.609	12.844	5.27621	4.67741	-0.598799	0	0.29777	1.39279	-0.178304
00000033_2.tif	control	1HR	8.771	11.943	5.27621	4.9341	-0.342115	0	0.29777	1.46923	-0.101872
00000033_2.tif	control	1HR	8.75	11.865	5.27621	4.9225	-0.35371	0	0.29777	1.46577	-0.105324
00000033_2.tif	control	1HR	10.453	12.198	5.27621	3.61468	-1.66153	0	0.29777	1.07634	-0.494755
00000033_2.tif	control	1HR	9.469	10.167	5.27621	3.82299	-1.45322	0	0.29777	1.13837	-0.432725
00000033_2.tif	control	1HR	9.297	6.854	5.27621	5.05133	-0.224885	0	0.29777	1.50413	-0.0669639
00000033_2.tif	control	1HR	9.391	6.766	5.27621	5.03269	-0.243521	0	0.29777	1.49858	-0.0725132
00000033_2.tif	control	1HR	14.13	7.042	5.27621	3.03088	-2.24533	0	0.29777	0.902506	-0.668592
00000033_2.tif	control	1HR	13.036	8.682	5.27621	1.29535	-3.98086	0	0.29777	0.385717	-1.18538
00000033_2.tif	control	1HR	13.276	8.682	5.27621	1.27104	-4.00517	0	0.29777	0.378477	-1.19262
00000033_2.tif	control	1HR	13.099	9.146	5.27621	0.828383	-4.44783	0	0.29777	0.246668	-1.32443
00000033_2.tif	control	1HR	12.37	9.021	5.27621	1.30678	-3.96943	0	0.29777	0.389121	-1.18198
00000033_2.tif	control	1HR	11.708	9.51	5.27621	1.639	-3.63721	0	0.29777	0.488046	-1.08305
00000033_2.tif	control	1HR	13.594	9.188	5.27621	0.824675	-4.45154	0	0.29777	0.245564	-1.32553
00000033_2.tif	control	1HR	14.391	9.5	5.27621	1.19425	-4.08196	0	0.29777	0.355612	-1.21549
00000033_2.tif	control	1HR	14.677	10.443	5.27621	1.47478	-3.80143	0	0.29777	0.439146	-1.13195
00000033_2.tif	control	1HR	12.505	10.573	5.27621	0.997177	-4.27904	0	0.29777	0.296929	-1.27417
00000033_2.tif	control	1HR	12.443	13.214	5.27621	3.3682	-1.90801	0	0.29777	1.00295	-0.568149
00000033_2.tif	control	1HR	13.578	13.359	5.27621	3.41849	-1.85772	0	0.29777	1.01792	-0.553173
00000033_2.tif	control	1HR	13.641	13.401	5.27621	3.46623	-1.80999	0	0.29777	1.03214	-0.53896
00000033_2.tif	control	1HR	15.51	11.87	5.27621	2.93617	-2.34005	0	0.29777	0.874302	-0.696796
00000033_2.tif	control	1HR	15.51	11.776	5.27621	2.87567	-2.40054	0	0.29777	0.85629	-0.714808
00000033_2.tif	control	1HR	15.344	10.323	5.27621	2.091	-3.18522	0	0.29777	0.622636	-0.948462
00000033_2.tif	control	1HR	15.734	10.281	5.27621	2.46988	-2.80634	0	0.29777	0.735455	-0.835643
00000033_2.tif	control	1HR	15.818	10.234	5.27621	2.54754	-2.72867	0	0.29777	0.758582	-0.812516
00000033_2.tif	control	1HR	16.276	10.599	5.27621	3.05899	-2.21722	0	0.29777	0.910875	-0.660223
00000033_2.tif	control	1HR	16.698	10.344	5.27621	3.43433	-1.84188	0	0.29777	1.02264	-0.548458
00000033_2.tif	control	1HR	16.76	10.312	5.27621	3.4925	-1.78371	0	0.29777	1.03996	-0.531136
00000033_2.tif	control	1HR	16.745	10.422	5.27621	3.49065	-1.78556	0	0.29777	1.03941	-0.531687
00000033_2.tif	control	1HR	17.036	9.823	5.27621	3.75225	-1.52396	0	0.29777	1.11731	-0.45379
00000033_2.tif	control	1HR	15.328	9.057	5.27621	2.22993	-3.04629	0	0.29777	0.664006	-0.907092
00000033_2.tif	control	1HR	15.021	7.526	5.27621	2.98338	-2.29283	0	0.29777	0.888361	-0.682737
00000033_2.tif	control	1HR	18.474	3.495	5.27621	8.28379	3.00757	1	0.29777	2.46666	0.895565
00000033_2.tif	control	1HR	22.092	12.703	5.27621	9.22541	3.94919	1	0.29777	2.74705	1.17595
00000033_2.tif	control	1HR	22.057	12.578	5.27621	9.15538	3.87917	1	0.29777	2.7262	1.1551
0000037_16.tif	predator	1HR	8.021	3.854	5.27078	9.46473	4.19394	1	0.29777	2.81831	1.24883
0000037_16.tif	predator	1HR	7.675	6.071	5.27078	8.26171	2.99093	1	0.29777	2.46009	0.89061
0000037_16.tif	predator	1HR	7.894	13.13	5.27078	6.95518	1.6844	1	0.29777	2.07104	0.501563
0000037_16.tif	predator	1HR	6.894	14.922	5.27078	8.60449	3.33371	1	0.29777	2.56216	0.99268
0000037_16.tif	predator	1HR	5.637	15.679	5.27078	10.0707	4.79991	1	0.29777	2.99875	1.42927
0000037_16.tif	predator	1HR	5.137	16.991	5.27078	11.1803	5.90949	1	0.29777	3.32915	1.75967
0000037_16.tif	predator	1HR	9.37	19.082	5.27078	9.71311	4.44233	1	0.29777	2.89227	1.32279
0000037_16.tif	predator	1HR	10.738	19.609	5.27078	9.55653	4.28575	1	0.29777	2.84565	1.27617
0000037_16.tif	predator	1HR	9.661	18.207	5.27078	8.81756	3.54678	1	0.29777	2.62561	1.05612
0000037_16.tif	predator	1HR	11.391	19.005	5.27078	8.75411	3.48333	1	0.29777	2.60671	1.03723
0000037_16.tif	predator	1HR	11.641	18.075	5.27078	7.79588	2.5251	1	0.29777	2.32138	0.751899
0000037_16.tif	predator	1HR	9.259	13.113	5.27078	5.68036	0.409575	1	0.29777	1.69144	0.121959
0000037_16.tif	predator	1HR	9.127	12.786	5.27078	5.67885	0.408065	1	0.29777	1.69099	0.12151
0000037_16.tif	predator	1HR	13.745	11.773	5.27078	1.19877	-4.07201	0	0.29777	0.356958	-1.21252
0000037_16.tif	predator	1HR	11.03	11.196	5.27078	3.44063	-1.83015	0	0.29777	1.02452	-0.544963
0000037_16.tif	predator	1HR	10.877	9.335	5.27078	3.86059	-1.41019	0	0.29777	1.14957	-0.419914
0000037_16.tif	predator	1HR	11.252	8.939	5.27078	3.69935	-1.57143	0	0.29777	1.10156	-0.467925
0000037_16.tif	predator	1HR	12.168	8.828	5.27078	3.0158	-2.25498	0	0.29777	0.898016	-0.671464
0000037_16.tif	predator	1HR	10.557	8.55	5.27078	4.49571	-0.775074	0	0.29777	1.33869	-0.230794
0000037_16.tif	predator	1HR	10.488	8.349	5.27078	4.6582	-0.612583	0	0.29777	1.38707	-0.182409
0000037_16.tif	predator	1HR	10.3	8.342	5.27078	4.8226	-0.448178	0	0.29777	1.43603	-0.133454
0000037_16.tif	predator	1HR	10.752	7.793	5.27078	4.76597	-0.504808	0	0.29777	1.41916	-0.150317
0000037_16.tif	predator	1HR	10.807	7.627	5.27078	4.83089	-0.43989	0	0.29777	1.43849	-0.130986
0000037_16.tif	predator	1HR	10.967	7.189	5.27078	5.01708	-0.253697	0	0.29777	1.49394	-0.0755434
0000037_16.tif	predator	1HR	14.859	8.273	5.27078	2.56218	-2.7086	0	0.29777	0.76294	-0.80654
0000037_16.tif	predator	1HR	14.936	8.391	5.27078	2.45989	-2.81089	0	0.29777	0.732482	-0.836999
0000037_16.tif	predator	1HR	15.29	9.668	5.27078	1.41242	-3.85836	0	0.29777	0.420575	-1.14891
0000037_16.tif	predator	1HR	18.512	9.439	5.27078	4.28647	-0.984306	0	0.29777	1.27638	-0.293097
0000037_16.tif	predator	1HR	18.345	8.814	5.27078	4.37479	-0.895995	0	0.29777	1.30268	-0.2668
0000037_16.tif	predator	1HR	16.679	10.602	5.27078	2.23995	-3.03083	0	0.29777	0.666989	-0.902492
0000037_16.tif	predator	1HR	15.054	10.832	5.27078	0.606742	-4.66404	0	0.29777	0.18067	-1.38881
0000037_16.tif	predator	1HR	18.54	13.943	5.27078	5.15852	-0.112259	0	0.29777	1.53605	-0.0334275
0000037_16.tif	predator	1HR	18.429	14.089	5.27078	5.16263	-0.108153	0	0.29777	1.53728	-0.0322046
0000037_16.tif	predator	1HR	18.79	13.394	5.27078	5.05682	-0.213961	0	0.29777	1.50577	-0.0637112
0000037_16.tif	predator	1HR	18.707	13.207	5.27078	4.89113	-0.379656	0	0.29777	1.45643	-0.11305
0000037_16.tif	predator	1HR	19.241	9.075	5.27078	5.09464	-0.176139	0	0.29777	1.51703	-0.0524489
0000037_16.tif	predator	1HR	19.443	9.012	5.27078	5.30605	0.0352651	1	0.29777	1.57998	0.0105009
0000037_16.tif	predator	1HR	18.97	8.22	5.27078	5.20723	-0.0635544	0	0.29777	1.55056	-0.0189246
00000052_4.tif	control	1HR	8.896	6.99	5.28128	6.42838	1.1471	1	0.29777	1.91418	0.341571
00000052_4.tif	control	1HR	10.172	7.901	5.28128	4.86153	-0.419746	0	0.29777	1.44762	-0.124988
00000052_4.tif	control	1HR	11.724	7.026	5.28128	4.48527	-0.796005	0	0.29777	1.33558	-0.237026
00000052_4.tif	control	1HR	9.786	8.823	5.28128	4.70043	-0.580851	0	0.29777	1.39965	-0.17296
00000052_4.tif	control	1HR	9.104	9.052	5.28128	5.23724	-0.0440346	0	0.29777	1.55949	-0.0131122
00000052_4.tif	control	1HR	9.302	9.297	5.28128	4.9686	-0.312676	0	0.29777	1.4795	-0.0931056
00000052_4.tif	control	1HR	9.25	10.083	5.28128	4.82709	-0.454188	0	0.29777	1.43736	-0.135244
00000052_4.tif	control	1HR	9.859	9.438	5.28128	4.39598	-0.885302	0	0.29777	1.30899	-0.263616
00000052_4.tif	control	1HR	10.672	9.906	5.28128	3.4786	-1.80267	0	0.29777	1.03582	-0.536782
00000052_4.tif	control	1HR	10.922	9.755	5.28128	3.28826	-1.99302	0	0.29777	0.979145	-0.593462
00000052_4.tif	control	1HR	9.724	10.927	5.28128	4.28621	-0.995073	0	0.29777	1.2763	-0.296303
00000052_4.tif	control	1HR	9.5	11.068	5.28128	4.51371	-0.767567	0	0.29777	1.34405	-0.228559
00000052_4.tif	control	1HR	9.589	13.036	5.28128	4.91651	-0.364772	0	0.29777	1.46399	-0.108618
00000052_4.tif	control	1HR	10.641	13.021	5.28128	3.98907	-1.29221	0	0.29777	1.18782	-0.384782
00000052_4.tif	control	1HR	11.5	12.724	5.28128	3.11159	-2.16968	0	0.29777	0.92654	-0.646067
00000052_4.tif	control	1HR	12.828	13.939	5.28128	3.27476	-2.00652	0	0.29777	0.975125	-0.597482
00000052_4.tif	control	1HR	14.238	14.911	5.28128	4.03245	-1.24883	0	0.29777	1.20074	-0.371863
00000052_4.tif	control	1HR	12.807	13.536	5.28128	2.91119	-2.37009	0	0.29777	0.866864	-0.705742
00000052_4.tif	control	1HR	12.613	13.321	5.28128	2.80815	-2.47313	0	0.29777	0.836183	-0.736424
00000052_4.tif	control	1HR	12.78	13.071	5.28128	2.50829	-2.77299	0	0.29777	0.746892	-0.825714
00000052_4.tif	control	1HR	12.634	12.599	5.28128	2.19799	-3.08329	0	0.29777	0.654496	-0.91811
00000052_4.tif	control	1HR	13.703	6.509	5.28128	4.38676	-0.894523	0	0.29777	1.30624	-0.266362
00000052_4.tif	control	1HR	16.594	6.333	5.28128	5.23429	-0.0469917	0	0.29777	1.55861	-0.0139927
00000052_4.tif	control	1HR	16.484	7.245	5.28128	4.40117	-0.880111	0	0.29777	1.31054	-0.262071
00000052_4.tif	control	1HR	15.766	6.984	5.28128	4.27801	-1.00327	0	0.29777	1.27386	-0.298744
00000052_4.tif	control	1HR	15.635	7.24	5.28128	3.99082	-1.29046	0	0.29777	1.18835	-0.38426
00000052_4.tif	control	1HR	15.109	8.474	5.28128	2.64966	-2.63161	0	0.29777	0.788991	-0.783616
00000052_4.tif	control	1HR	15.427	8.833	5.28128	2.49371	-2.78757	0	0.29777	0.742552	-0.830054
00000052_4.tif	control	1HR	16.286	8.411	5.28128	3.36167	-1.9196	0	0.29777	1.00101	-0.571601
00000052_4.tif	control	1HR	16.453	8.505	5.28128	3.41067	-1.87061	0	0.29777	1.01559	-0.557012
00000052_4.tif	control	1HR	16.495	8.672	5.28128	3.32755	-1.95373	0	0.29777	0.990845	-0.581762
00000052_4.tif	control	1HR	16.682	8.823	5.28128	3.37512	-1.90616	0	0.29777	1.00501	-0.567597
00000052_4.tif	control	1HR	16.214	8.146	5.28128	3.51564	-1.76564	0	0.29777	1.04685	-0.525754
00000052_4.tif	control	1HR	16.255	10.281	5.28128	2.32483	-2.95645	0	0.29777	0.692265	-0.880341
00000052_4.tif	control	1HR	16.099	10.609	5.28128	2.10715	-3.17412	0	0.29777	0.627447	-0.945159
00000052_4.tif	control	1HR	16.062	10.693	5.28128	2.06096	-3.22032	0	0.29777	0.613693	-0.958913
00000052_4.tif	control	1HR	14.969	10.281	5.28128	1.13336	-4.14792	0	0.29777	0.33748	-1.23513
00000052_4.tif	control	1HR	14.969	13.745	5.28128	3.0165	-2.26478	0	0.29777	0.898224	-0.674383
00000052_4.tif	control	1HR	15.391	14.432	5.28128	3.80636	-1.47492	0	0.29777	1.13342	-0.439187
00000052_4.tif	control	1HR	15.844	14.443	5.28128	4.00286	-1.27841	0	0.29777	1.19193	-0.380674
00000052_4.tif	control	1HR	18.771	12.984	5.28128	5.20316	-0.078114	0	0.29777	1.54935	-0.02326
00000052_4.tif	control	1HR	18.818	12.849	5.28128	5.19367	-0.0876132	0	0.29777	1.54652	-0.0260886
00000052_4.tif	control	1HR	18.615	11.828	5.28128	4.70056	-0.580718	0	0.29777	1.39969	-0.17292
00000052_4.tif	control	1HR	17.906	9.885	5.28128	4.02229	-1.25899	0	0.29777	1.19772	-0.374889
00000052_4.tif	control	1HR	17.823	9.896	5.28128	3.93917	-1.3421	0	0.29777	1.17297	-0.399639
00000052_4.tif	control	1HR	19.344	8.542	5.28128	5.82591	0.544629	1	0.29777	1.73478	0.162174
00000052_4.tif	control	1HR	22.245	9.375	5.28128	8.3723	3.09102	1	0.29777	2.49302	0.920412
00000052_4.tif	control	1HR	20.599	10.74	5.28128	6.5906	1.30932	1	0.29777	1.96248	0.389875
00000052_4.tif	control	1HR	22.135	12.443	5.28128	8.27303	2.99175	1	0.29777	2.46346	0.890853
00000052_4.tif	control	1HR	22.307	12.385	5.28128	8.4315	3.15022	1	0.29777	2.51065	0.938042
00000052_8.tif	control	1HR	11.135	13.979	5.20851	3.82296	-1.38556	0	0.29777	1.13836	-0.412577
00000052_8.tif	control	1HR	11.057	13.885	5.20851	3.83628	-1.37223	0	0.29777	1.14233	-0.408609
00000052_8.tif	control	1HR	12.161	14.172	5.20851	3.17159	-2.03693	0	0.29777	0.944403	-0.606535
00000052_8.tif	control	1HR	13.188	14.672	5.20851	3.05542	-2.15309	0	0.29777	0.909814	-0.641125
00000052_8.tif	control	1HR	11.411	13.328	5.20851	3.25041	-1.9581	0	0.29777	0.967876	-0.583063
00000052_8.tif	control	1HR	10.672	12.474	5.20851	3.67807	-1.53044	0	0.29777	1.09522	-0.45572
00000052_8.tif	control	1HR	12.276	12.24	5.20851	2.05868	-3.14984	0	0.29777	0.613012	-0.937927
00000052_8.tif	control	1HR	11.349	9.948	5.20851	3.48954	-1.71897	0	0.29777	1.03908	-0.511859
00000052_8.tif	control	1HR	11.443	9.911	5.20851	3.43111	-1.7774	0	0.29777	1.02168	-0.529256
00000052_8.tif	control	1HR	11.396	9.885	5.20851	3.48463	-1.72388	0	0.29777	1.03762	-0.51332
00000052_8.tif	control	1HR	10.964	9.719	5.20851	3.93731	-1.2712	0	0.29777	1.17241	-0.378526
00000052_8.tif	control	1HR	11.203	9.188	5.20851	4.06019	-1.14832	0	0.29777	1.209	-0.341936
00000052_8.tif	control	1HR	13.094	7.172	5.20851	4.80281	-0.4057	0	0.29777	1.43013	-0.120805
00000052_8.tif	control	1HR	13.656	9	5.20851	2.89376	-2.31476	0	0.29777	0.861674	-0.689265
00000052_8.tif	control	1HR	15.828	9.245	5.20851	3.0009	-2.20762	0	0.29777	0.893577	-0.657362
00000052_8.tif	control	1HR	15.885	9.125	5.20851	3.13319	-2.07533	0	0.29777	0.932969	-0.61797
00000052_8.tif	control	1HR	16.964	9.109	5.20851	3.80859	-1.39992	0	0.29777	1.13408	-0.416854
00000052_8.tif	control	1HR	15.146	10.328	5.20851	1.72173	-3.48679	0	0.29777	0.512678	-1.03826
00000052_8.tif	control	1HR	13.359	10.682	5.20851	1.4739	-3.73462	0	0.29777	0.438882	-1.11206
00000052_8.tif	control	1HR	13.62	11.292	5.20851	0.856472	-4.35204	0	0.29777	0.255032	-1.29591
00000052_8.tif	control	1HR	13.88	11.635	5.20851	0.452866	-4.75565	0	0.29777	0.13485	-1.41609
00000052_8.tif	control	1HR	13.943	11.724	5.20851	0.36277	-4.84574	0	0.29777	0.108022	-1.44292
00000052_8.tif	control	1HR	15.375	10.974	5.20851	1.37611	-3.8324	0	0.29777	0.409765	-1.14117
00000052_8.tif	control	1HR	15.339	10.87	5.20851	1.41577	-3.79274	0	0.29777	0.421575	-1.12936
00000052_8.tif	control	1HR	16.724	11.01	5.20851	2.56429	-2.64422	0	0.29777	0.763569	-0.787369
00000052_8.tif	control	1HR	16.203	11.615	5.20851	1.92229	-3.28623	0	0.29777	0.572399	-0.978539
00000052_8.tif	control	1HR	15.75	12	5.20851	1.4687	-3.73981	0	0.29777	0.437336	-1.1136
00000052_8.tif	control	1HR	15.094	12.062	5.20851	0.836854	-4.37166	0	0.29777	0.24919	-1.30175
00000052_8.tif	control	1HR	14.469	13.417	5.20851	1.6038	-3.60471	0	0.29777	0.477563	-1.07338
00000052_8.tif	control	1HR	13.583	13.693	5.20851	1.9999	-3.20862	0	0.29777	0.595509	-0.95543
00000052_8.tif	control	1HR	15.021	16.286	5.20851	4.52215	-0.686365	0	0.29777	1.34656	-0.204379
00000052_8.tif	control	1HR	17.363	10.29	5.20851	3.43237	-1.77615	0	0.29777	1.02206	-0.528883
00000052_8.tif	control	1HR	20.922	16.776	5.20851	8.27581	3.0673	1	0.29777	2.46429	0.913351
0000054_12.tif	predator	1HR	4.458	6.427	5.21886	9.75323	4.53437	1	0.29777	2.90422	1.3502
0000054_12.tif	predator	1HR	5.161	6.807	5.21886	8.95561	3.73675	1	0.29777	2.66671	1.11269
0000054_12.tif	predator	1HR	3.552	6.812	5.21886	10.3521	5.13323	1	0.29777	3.08254	1.52852
0000054_12.tif	predator	1HR	3.62	6.964	5.21886	10.2225	5.00359	1	0.29777	3.04394	1.48992
0000054_12.tif	predator	1HR	5.385	8.234	5.21886	8.08201	2.86314	1	0.29777	2.40658	0.852559
0000054_12.tif	predator	1HR	8.323	18.13	5.21886	7.92067	2.70181	1	0.29777	2.35854	0.804517
0000054_12.tif	predator	1HR	9.505	17.771	5.21886	7.00583	1.78697	1	0.29777	2.08613	0.532107
0000054_12.tif	predator	1HR	6.344	11.646	5.21886	6.40655	1.18769	1	0.29777	1.90768	0.353659
0000054_12.tif	predator	1HR	10.719	1.188	5.21886	10.5709	5.35208	1	0.29777	3.14771	1.59369
0000054_12.tif	predator	1HR	10.901	1.245	5.21886	10.4814	5.26252	1	0.29777	3.12104	1.56702
0000054_12.tif	predator	1HR	10.484	9.766	5.21886	2.89143	-2.32743	0	0.29777	0.860981	-0.693039
0000054_12.tif	predator	1HR	11.042	11.062	5.21886	1.77968	-3.43918	0	0.29777	0.529936	-1.02408
0000054_12.tif	predator	1HR	10.969	11.146	5.21886	1.82894	-3.38992	0	0.29777	0.544603	-1.00942
0000054_12.tif	predator	1HR	10.807	12.229	5.21886	2.0543	-3.16456	0	0.29777	0.611708	-0.942312
0000054_12.tif	predator	1HR	10.891	12.365	5.21886	2.02502	-3.19384	0	0.29777	0.602989	-0.951031
0000054_12.tif	predator	1HR	10.812	12.484	5.21886	2.14614	-3.07272	0	0.29777	0.639057	-0.914963
0000054_12.tif	predator	1HR	10.625	12.589	5.21886	2.36016	-2.8587	0	0.29777	0.702785	-0.851235
0000054_12.tif	predator	1HR	10.661	12.802	5.21886	2.4293	-2.78956	0	0.29777	0.723374	-0.830646
0000054_12.tif	predator	1HR	13.438	13.516	5.21886	2.07158	-3.14728	0	0.29777	0.616856	-0.937165
0000054_12.tif	predator	1HR	16.115	13.651	5.21886	3.9607	-1.25816	0	0.29777	1.17938	-0.374642
0000054_12.tif	predator	1HR	13.854	10.656	5.21886	1.42816	-3.7907	0	0.29777	0.425264	-1.12876
0000054_12.tif	predator	1HR	15.682	10.328	5.21886	3.1811	-2.03776	0	0.29777	0.947235	-0.606785
0000054_12.tif	predator	1HR	15.521	9.635	5.21886	3.37517	-1.84369	0	0.29777	1.00502	-0.548996
0000054_12.tif	predator	1HR	14.776	1.896	5.21886	9.87604	4.65718	1	0.29777	2.94079	1.38677
0000054_12.tif	predator	1HR	14.87	1.859	5.21886	9.9319	4.71304	1	0.29777	2.95742	1.4034
0000054_12.tif	predator	1HR	14.724	1.229	5.21886	10.5199	5.301	1	0.29777	3.1325	1.57848
0000054_12.tif	predator	1HR	16.906	2.958	5.21886	9.55516	4.3363	1	0.29777	2.84524	1.29122
0000054_12.tif	predator	1HR	16.849	2.557	5.21886	9.89403	4.67517	1	0.29777	2.94615	1.39213
0000054_12.tif	predator	1HR	18.995	6.656	5.21886	7.94159	2.72273	1	0.29777	2.36477	0.810747
0000054_12.tif	predator	1HR	17.625	6.312	5.21886	7.16436	1.9455	1	0.29777	2.13333	0.579313
0000004_13.tif	predator	1HR	14.703	10.984	4.60418	1.26807	-3.33611	0	0.29777	0.377594	-0.993393
0000004_13.tif	predator	1HR	15.276	10.531	4.60418	1.06123	-3.54295	0	0.29777	0.316003	-1.05498
0000004_13.tif	predator	1HR	16.141	11.198	4.60418	0.300323	-4.30386	0	0.29777	0.0894272	-1.28156
0000004_13.tif	predator	1HR	13.938	9.651	4.60418	2.62293	-1.98125	0	0.29777	0.781031	-0.589956
0000004_13.tif	predator	1HR	13.839	9.234	4.60418	2.98317	-1.62101	0	0.29777	0.888298	-0.482689
0000004_13.tif	predator	1HR	12.917	9.771	4.60418	3.39693	-1.20725	0	0.29777	1.0115	-0.359484
0000004_13.tif	predator	1HR	14.807	8.312	4.60418	3.26361	-1.34057	0	0.29777	0.971804	-0.399183
0000004_13.tif	predator	1HR	14.818	8.219	4.60418	3.34773	-1.25645	0	0.29777	0.996854	-0.374133
0000004_13.tif	predator	1HR	15.656	8	4.60418	3.39422	-1.20996	0	0.29777	1.0107	-0.36029
0000004_13.tif	predator	1HR	15.365	7.693	4.60418	3.73143	-0.872754	0	0.29777	1.11111	-0.25988
0000004_13.tif	predator	1HR	14.219	7.568	4.60418	4.17318	-0.430998	0	0.29777	1.24265	-0.128338
0000004_13.tif	predator	1HR	15.354	7.135	4.60418	4.2857	-0.318483	0	0.29777	1.27615	-0.0948348
0000004_13.tif	predator	1HR	15.099	6.87	4.60418	4.58655	-0.0176275	0	0.29777	1.36574	-0.00524893
0000004_13.tif	predator	1HR	15.984	5.594	4.60418	5.79153	1.18734	1	0.29777	1.72454	0.353555
0000004_13.tif	predator	1HR	16.229	5.115	4.60418	6.27831	1.67413	1	0.29777	1.86949	0.498507
0000004_13.tif	predator	1HR	16.188	5.01	4.60418	6.38123	1.77705	1	0.29777	1.90014	0.529153
0000004_13.tif	predator	1HR	16.146	4.948	4.60418	6.44147	1.83729	1	0.29777	1.91808	0.54709
0000004_13.tif	predator	1HR	14.182	1.594	4.60418	9.94162	5.33744	1	0.29777	2.96032	1.58933
0000004_13.tif	predator	1HR	14.208	1.734	4.60418	9.79923	5.19505	1	0.29777	2.91792	1.54693
0000004_13.tif	predator	1HR	17.87	5.896	4.60418	5.82979	1.22561	1	0.29777	1.73594	0.364949
0000004_13.tif	predator	1HR	16.99	10.594	4.60418	1.34192	-3.26227	0	0.29777	0.399582	-0.971405
0000004_13.tif	predator	1HR	17.052	11.802	4.60418	1.21951	-3.38467	0	0.29777	0.363134	-1.00785
0000004_13.tif	predator	1HR	17.38	12.188	4.60418	1.67854	-2.92564	0	0.29777	0.499818	-0.871169
0000004_13.tif	predator	1HR	18.214	12.438	4.60418	2.53686	-2.06732	0	0.29777	0.755402	-0.615585
0000004_13.tif	predator	1HR	18.844	12.443	4.60418	3.12269	-1.48149	0	0.29777	0.929844	-0.441143
0000004_13.tif	predator	1HR	18.938	12.344	4.60418	3.18005	-1.42413	0	0.29777	0.946923	-0.424064
0000004_13.tif	predator	1HR	21.755	13.594	4.60418	6.25224	1.64806	1	0.29777	1.86173	0.490742
0000004_13.tif	predator	1HR	21.495	13.172	4.60418	5.86773	1.26355	1	0.29777	1.74723	0.376248
0000004_13.tif	predator	1HR	22.104	13.271	4.60418	6.4786	1.87441	1	0.29777	1.92913	0.558144
0000004_13.tif	predator	1HR	23.905	14.783	4.60418	8.69082	4.08664	1	0.29777	2.58787	1.21688
0000004_13.tif	predator	1HR	24.821	14.512	4.60418	9.44751	4.84332	1	0.29777	2.81318	1.4422
0000004_13.tif	predator	1HR	24.842	14.373	4.60418	9.42233	4.81815	1	0.29777	2.80569	1.4347
0000004_13.tif	predator	1HR	25.043	14.158	4.60418	9.54852	4.94434	1	0.29777	2.84326	1.47228
0000004_13.tif	predator	1HR	24.543	13.887	4.60418	8.9921	4.38791	1	0.29777	2.67758	1.30659
00000005_3.tif	control	1HR	11.734	14.688	4.59383	3.83386	-0.759978	0	0.29777	1.14161	-0.226299
00000005_3.tif	control	1HR	12.573	13.99	4.59383	2.79118	-1.80265	0	0.29777	0.831131	-0.536775
00000005_3.tif	control	1HR	11.677	13.708	4.59383	3.13233	-1.4615	0	0.29777	0.932714	-0.435192
00000005_3.tif	control	1HR	13.5	13.438	4.59383	1.92307	-2.67077	0	0.29777	0.572632	-0.795274
00000005_3.tif	control	1HR	13.432	13.438	4.59383	1.94077	-2.65306	0	0.29777	0.577904	-0.790002
00000005_3.tif	control	1HR	10.234	12.542	4.59383	3.85865	-0.735183	0	0.29777	1.14899	-0.218915
00000005_3.tif	control	1HR	10.469	11.776	4.59383	3.50588	-1.08795	0	0.29777	1.04395	-0.323959
00000005_3.tif	control	1HR	10.51	11.714	4.59383	3.46187	-1.13196	0	0.29777	1.03084	-0.337064
00000005_3.tif	control	1HR	13.094	11.474	4.59383	0.880583	-3.71325	0	0.29777	0.262211	-1.10569
00000005_3.tif	control	1HR	13.156	10.068	4.59383	1.71055	-2.88328	0	0.29777	0.509352	-0.858554
00000005_3.tif	control	1HR	13.104	9.693	4.59383	2.06945	-2.52438	0	0.29777	0.61622	-0.751686
00000005_3.tif	control	1HR	12.755	9.276	4.59383	2.59808	-1.99576	0	0.29777	0.773629	-0.594276
00000005_3.tif	control	1HR	10.62	8.875	4.59383	4.30058	-0.293252	0	0.29777	1.28058	-0.0873216
00000005_3.tif	control	1HR	12.37	8.5	4.59383	3.46412	-1.12971	0	0.29777	1.03151	-0.336395
00000005_3.tif	control	1HR	11.714	8.245	4.59383	4.02003	-0.573808	0	0.29777	1.19704	-0.170863
00000005_3.tif	control	1HR	11.604	8.266	4.59383	4.06565	-0.528188	0	0.29777	1.21063	-0.157279
00000005_3.tif	control	1HR	17.12	10.328	4.59383	3.38804	-1.20579	0	0.29777	1.00886	-0.359049
00000005_3.tif	control	1HR	17.281	10.245	4.59383	3.56832	-1.02551	0	0.29777	1.06254	-0.305366
00000005_3.tif	control	1HR	14.979	13.63	4.59383	2.29158	-2.30225	0	0.29777	0.682364	-0.685541
00000005_3.tif	control	1HR	14.906	13.661	4.59383	2.28861	-2.30523	0	0.29777	0.681478	-0.686428
00000005_3.tif	control	1HR	14.958	13.771	4.59383	2.41025	-2.18358	0	0.29777	0.717701	-0.650205
00000005_3.tif	control	1HR	18.094	10.734	4.59383	4.20946	-0.384375	0	0.29777	1.25345	-0.114455
00000005_3.tif	control	1HR	17.906	10.625	4.59383	4.04953	-0.544306	0	0.29777	1.20583	-0.162078
00000005_3.tif	control	1HR	17.844	10.531	4.59383	4.01265	-0.58118	0	0.29777	1.19485	-0.173058
00000005_3.tif	control	1HR	20.604	6.854	4.59383	8.142	3.54817	1	0.29777	2.42444	1.05654
00000005_3.tif	control	1HR	20.021	6.682	4.59383	7.7813	3.18746	1	0.29777	2.31704	0.949131
00000005_3.tif	control	1HR	19.464	6	4.59383	7.82645	3.23262	1	0.29777	2.33048	0.962577
00000005_3.tif	control	1HR	19.318	6	4.59383	7.72464	3.13081	1	0.29777	2.30017	0.932261
00000005_3.tif	control	1HR	18.75	5.812	4.59383	7.48646	2.89263	1	0.29777	2.22924	0.861337
00000005_3.tif	control	1HR	18.177	5.734	4.59383	7.1973	2.60347	1	0.29777	2.14314	0.775235
0000007_10.tif	predator	1HR	8.427	14.786	4.77612	7.91919	3.14306	1	0.29777	2.3581	0.93591
0000007_10.tif	predator	1HR	13.391	13.109	4.77612	2.68237	-2.09375	0	0.29777	0.79873	-0.623456
0000007_10.tif	predator	1HR	14.833	13.208	4.77612	1.5179	-3.25823	0	0.29777	0.451984	-0.970202
0000007_10.tif	predator	1HR	11.312	12.833	4.77612	4.62502	-0.151105	0	0.29777	1.37719	-0.0449945
0000007_10.tif	predator	1HR	11.443	12.802	4.77612	4.49079	-0.285331	0	0.29777	1.33722	-0.0849631
0000007_10.tif	predator	1HR	11.349	12.115	4.77612	4.531	-0.24512	0	0.29777	1.3492	-0.0729894
0000007_10.tif	predator	1HR	11.484	4.568	4.77612	8.72877	3.95265	1	0.29777	2.59917	1.17698
0000007_10.tif	predator	1HR	17.286	10.062	4.77612	2.48335	-2.29277	0	0.29777	0.739468	-0.682718
0000007_10.tif	predator	1HR	17.786	9.672	4.77612	3.09383	-1.68229	0	0.29777	0.921251	-0.500936
0000007_10.tif	predator	1HR	18.401	10.526	4.77612	2.9768	-1.79933	0	0.29777	0.886401	-0.535785
0000007_10.tif	predator	1HR	18.792	11.724	4.77612	2.93734	-1.83878	0	0.29777	0.874652	-0.547535
0000007_10.tif	predator	1HR	18.88	11.677	4.77612	3.03094	-1.74518	0	0.29777	0.902524	-0.519662
0000007_10.tif	predator	1HR	16.786	11.479	4.77612	1.10351	-3.67261	0	0.29777	0.328592	-1.09359
0000007_10.tif	predator	1HR	16.703	11.51	4.77612	1.0179	-3.75822	0	0.29777	0.303101	-1.11908
0000007_10.tif	predator	1HR	16.661	11.401	4.77612	1.05415	-3.72198	0	0.29777	0.313893	-1.10829
0000007_10.tif	predator	1HR	16.464	11.37	4.77612	0.941901	-3.83422	0	0.29777	0.28047	-1.14172
0000007_10.tif	predator	1HR	15.901	12.286	4.77612	0.178241	-4.59788	0	0.29777	0.0530749	-1.36911
0000007_10.tif	predator	1HR	15.833	12.427	4.77612	0.321455	-4.45467	0	0.29777	0.0957195	-1.32647
0000007_10.tif	predator	1HR	16.057	12.74	4.77612	0.655355	-4.12077	0	0.29777	0.195145	-1.22704
0000007_10.tif	predator	1HR	16.203	13.198	4.77612	1.13589	-3.64023	0	0.29777	0.338234	-1.08395
0000007_10.tif	predator	1HR	20.911	15.182	4.77612	5.89528	1.11915	1	0.29777	1.75544	0.33325
0000007_10.tif	predator	1HR	20.745	15.219	4.77612	5.77411	0.997984	1	0.29777	1.71936	0.29717
0000007_10.tif	predator	1HR	20.271	13.37	4.77612	4.56848	-0.207645	0	0.29777	1.36036	-0.0618304
0000007_10.tif	predator	1HR	20.333	13.25	4.77612	4.59686	-0.179267	0	0.29777	1.36881	-0.0533804
0000007_10.tif	predator	1HR	19.594	12.526	4.77612	3.73734	-1.03879	0	0.29777	1.11287	-0.30932
0000007_10.tif	predator	1HR	20.193	11.87	4.77612	4.31962	-0.456507	0	0.29777	1.28625	-0.135934
0000007_10.tif	predator	1HR	20.005	10.917	4.77612	4.29377	-0.482351	0	0.29777	1.27856	-0.14363
0000007_10.tif	predator	1HR	22	10.891	4.77612	6.24003	1.4639	1	0.29777	1.85809	0.435906
0000007_10.tif	predator	1HR	22.667	10.859	4.77612	6.90115	2.12503	1	0.29777	2.05496	0.632769
0000007_10.tif	predator	1HR	23.203	10.339	4.77612	7.53387	2.75775	1	0.29777	2.24336	0.821175
0000007_10.tif	predator	1HR	23.167	9.849	4.77612	7.62941	2.85329	1	0.29777	2.27181	0.849624
0000007_10.tif	predator	1HR	23.135	8.839	4.77612	7.95788	3.18176	1	0.29777	2.36962	0.947433
0000007_10.tif	predator	1HR	23.208	8.646	4.77612	8.10506	3.32893	1	0.29777	2.41344	0.991256
00000012_5.tif	control	1HR	8.833	4.542	4.69292	9.05793	4.36501	1	0.29777	2.69718	1.29977
00000012_5.tif	control	1HR	8.707	5.724	4.69292	8.31063	3.6177	1	0.29777	2.47466	1.07724
00000012_5.tif	control	1HR	11.38	9.405	4.69292	3.97841	-0.714513	0	0.29777	1.18465	-0.21276
00000012_5.tif	control	1HR	11.214	9.675	4.69292	4.01043	-0.682497	0	0.29777	1.19419	-0.203227
00000012_5.tif	control	1HR	10.637	11.036	4.69292	4.26076	-0.43216	0	0.29777	1.26873	-0.128684
00000012_5.tif	control	1HR	10.727	11.12	4.69292	4.16692	-0.526004	0	0.29777	1.24078	-0.156628
00000012_5.tif	control	1HR	10.97	11.273	4.69292	3.921	-0.771924	0	0.29777	1.16756	-0.229856
00000012_5.tif	control	1HR	13.953	15.432	4.69292	4.26054	-0.432387	0	0.29777	1.26866	-0.128752
00000012_5.tif	control	1HR	14.062	15.344	4.69292	4.15161	-0.541315	0	0.29777	1.23622	-0.161187
00000012_5.tif	control	1HR	14.375	14.099	4.69292	2.86977	-1.82315	0	0.29777	0.854532	-0.542881
00000012_5.tif	control	1HR	15.505	11.953	4.69292	0.913961	-3.77896	0	0.29777	0.27215	-1.12526
00000012_5.tif	control	1HR	15.589	11.896	4.69292	0.933597	-3.75933	0	0.29777	0.277997	-1.11941
00000012_5.tif	control	1HR	14.172	8.745	4.69292	2.63114	-2.06178	0	0.29777	0.783476	-0.613936
00000012_5.tif	control	1HR	14.396	8.375	4.69292	2.94293	-1.75	0	0.29777	0.876316	-0.521096
00000012_5.tif	control	1HR	14.25	8.292	4.69292	3.05207	-1.64085	0	0.29777	0.908815	-0.488597
00000012_5.tif	control	1HR	15.495	8.365	4.69292	2.973	-1.71992	0	0.29777	0.885271	-0.512142
00000012_5.tif	control	1HR	12.438	7.219	4.69292	4.74093	0.0480095	1	0.29777	1.41171	0.0142958
00000012_5.tif	control	1HR	15.094	7.057	4.69292	4.22388	-0.469044	0	0.29777	1.25775	-0.139667
00000012_5.tif	control	1HR	15.135	6.964	4.69292	4.3189	-0.374027	0	0.29777	1.28604	-0.111374
00000012_5.tif	control	1HR	15.818	7.12	4.69292	4.25813	-0.434795	0	0.29777	1.26794	-0.129469
00000012_5.tif	control	1HR	15.833	7.078	4.69292	4.30239	-0.390534	0	0.29777	1.28112	-0.116289
00000012_5.tif	control	1HR	15.672	6.958	4.69292	4.38806	-0.304863	0	0.29777	1.30663	-0.0907791
00000012_5.tif	control	1HR	16.198	7.396	4.69292	4.09422	-0.598703	0	0.29777	1.21914	-0.178276
00000012_5.tif	control	1HR	16.359	7.438	4.69292	4.10917	-0.583756	0	0.29777	1.22359	-0.173825
00000012_5.tif	control	1HR	18.979	6.927	4.69292	5.96871	1.27579	1	0.29777	1.7773	0.379892
00000012_5.tif	control	1HR	19.036	6.74	4.69292	6.14462	1.45169	1	0.29777	1.82968	0.43227
00000012_5.tif	control	1HR	17.333	8.344	4.69292	3.81576	-0.87717	0	0.29777	1.13622	-0.261195
00000012_5.tif	control	1HR	17.333	8.438	4.69292	3.74401	-0.948915	0	0.29777	1.11485	-0.282558
00000012_5.tif	control	1HR	15.953	8.484	4.69292	2.98716	-1.70577	0	0.29777	0.889486	-0.507926
00000012_5.tif	control	1HR	16.052	8.474	4.69292	3.03301	-1.65992	0	0.29777	0.903138	-0.494274
00000012_5.tif	control	1HR	18.104	9.833	4.69292	3.52216	-1.17076	0	0.29777	1.04879	-0.348618
00000012_5.tif	control	1HR	16.693	10.984	4.69292	1.8255	-2.86742	0	0.29777	0.543581	-0.853832
00000012_5.tif	control	1HR	16.792	10.958	4.69292	1.92741	-2.76551	0	0.29777	0.573926	-0.823486
00000012_5.tif	control	1HR	16.734	11.375	4.69292	1.84566	-2.84727	0	0.29777	0.549581	-0.847831
00000012_5.tif	control	1HR	17.703	11.234	4.69292	2.81231	-1.88061	0	0.29777	0.837423	-0.55999
00000012_5.tif	control	1HR	17.547	11.703	4.69292	2.69011	-2.00282	0	0.29777	0.801033	-0.59638
00000012_5.tif	control	1HR	18.391	10.958	4.69292	3.51442	-1.17851	0	0.29777	1.04649	-0.350924
00000012_5.tif	control	1HR	19.208	11.74	4.69292	4.34186	-0.351061	0	0.29777	1.29288	-0.104535
00000012_5.tif	control	1HR	19.859	12.854	4.69292	5.21259	0.519667	1	0.29777	1.55215	0.154741
00000012_5.tif	control	1HR	17.422	12.385	4.69292	2.7633	-1.92962	0	0.29777	0.822829	-0.574584
00000012_5.tif	control	1HR	17.49	12.37	4.69292	2.81986	-1.87306	0	0.29777	0.839671	-0.557741
00000012_5.tif	control	1HR	16.359	12.24	4.69292	1.75622	-2.9367	0	0.29777	0.522951	-0.874462
00000012_5.tif	control	1HR	16.516	12.49	4.69292	2.0284	-2.66452	0	0.29777	0.603998	-0.793414
00000012_5.tif	control	1HR	16.286	12.276	4.69292	1.7164	-2.97653	0	0.29777	0.511092	-0.88632
00000012_5.tif	control	1HR	16.188	13.943	4.69292	2.96565	-1.72727	0	0.29777	0.883083	-0.51433
00000012_5.tif	control	1HR	17.474	13.724	4.69292	3.55873	-1.13419	0	0.29777	1.05968	-0.337728
00000012_5.tif	control	1HR	17.5	12.802	4.69292	3.02251	-1.67042	0	0.29777	0.900012	-0.4974
00000017_6.tif	control	1HR	14.297	9.849	4.62002	2.71329	-1.90673	0	0.29777	0.807938	-0.567766
00000017_6.tif	control	1HR	12.688	10.375	4.62002	4.06079	-0.559226	0	0.29777	1.20918	-0.166521
00000017_6.tif	control	1HR	12.734	10.505	4.62002	3.99227	-0.627755	0	0.29777	1.18878	-0.186927
00000017_6.tif	control	1HR	15.729	7.49	4.62002	3.79018	-0.829837	0	0.29777	1.1286	-0.247101
00000017_6.tif	control	1HR	15.042	8.12	4.62002	3.4503	-1.16972	0	0.29777	1.0274	-0.348307
00000017_6.tif	control	1HR	16.094	7.427	4.62002	3.77847	-0.84155	0	0.29777	1.12512	-0.250588
00000017_6.tif	control	1HR	14.911	6.938	4.62002	4.57546	-0.0445586	0	0.29777	1.36244	-0.0132682
00000017_6.tif	control	1HR	15.828	6.734	4.62002	4.50674	-0.113285	0	0.29777	1.34197	-0.0337328
00000017_6.tif	control	1HR	15.052	11.531	4.62002	1.66172	-2.9583	0	0.29777	0.494809	-0.880894
00000017_6.tif	control	1HR	18.234	14.62	4.62002	3.79533	-0.824691	0	0.29777	1.13014	-0.245568
00000017_6.tif	control	1HR	18.062	14.474	4.62002	3.59278	-1.02724	0	0.29777	1.06982	-0.305881
00000017_6.tif	control	1HR	18.036	14.312	4.62002	3.43355	-1.18647	0	0.29777	1.02241	-0.353294
00000017_6.tif	control	1HR	17.969	14.214	4.62002	3.31708	-1.30294	0	0.29777	0.987727	-0.387977
00000017_6.tif	control	1HR	17.729	14.005	4.62002	3.03407	-1.58595	0	0.29777	0.903455	-0.472248
00000017_6.tif	control	1HR	17.349	12.146	4.62002	1.19522	-3.4248	0	0.29777	0.355901	-1.0198
00000017_6.tif	control	1HR	18.38	11.12	4.62002	1.70849	-2.91153	0	0.29777	0.508738	-0.866966
00000017_6.tif	control	1HR	17.177	10.151	4.62002	1.12921	-3.49081	0	0.29777	0.336246	-1.03946
00000017_6.tif	control	1HR	16.917	9.208	4.62002	1.96831	-2.65171	0	0.29777	0.586103	-0.789601
00000017_6.tif	control	1HR	17.016	9.109	4.62002	2.08063	-2.53939	0	0.29777	0.619551	-0.756153
00000017_6.tif	control	1HR	17.042	9.172	4.62002	2.02312	-2.5969	0	0.29777	0.602425	-0.773279
00000017_6.tif	control	1HR	17.109	9.255	4.62002	1.95546	-2.66457	0	0.29777	0.582276	-0.793428
00000017_6.tif	control	1HR	17.609	8.609	4.62002	2.71858	-1.90144	0	0.29777	0.809511	-0.566192
00000017_6.tif	control	1HR	17.708	8.573	4.62002	2.78766	-1.83236	0	0.29777	0.830081	-0.545622
00000017_6.tif	control	1HR	16.958	8.099	4.62002	3.07533	-1.54469	0	0.29777	0.91574	-0.459963
00000017_6.tif	control	1HR	18.193	6.823	4.62002	4.59692	-0.0230991	0	0.29777	1.36883	-0.00687821
00000017_6.tif	control	1HR	18.302	6.104	4.62002	5.31321	0.693185	1	0.29777	1.58211	0.20641
00000017_6.tif	control	1HR	16.089	6.536	4.62002	4.6616	0.0415796	1	0.29777	1.38808	0.0123812
00000017_6.tif	control	1HR	19.745	8.823	4.62002	3.86129	-0.758729	0	0.29777	1.14978	-0.225927
00000017_6.tif	control	1HR	19.427	10.302	4.62002	2.88581	-1.73421	0	0.29777	0.859308	-0.516395
00000017_6.tif	control	1HR	19.807	10.542	4.62002	3.19553	-1.42449	0	0.29777	0.951532	-0.424172
00000017_6.tif	control	1HR	19.99	11.193	4.62002	3.31815	-1.30187	0	0.29777	0.988047	-0.387657
00000017_6.tif	control	1HR	19.766	11.333	4.62002	3.09878	-1.52124	0	0.29777	0.922723	-0.452981
00000017_6.tif	control	1HR	20.484	11.354	4.62002	3.81688	-0.803138	0	0.29777	1.13655	-0.23915
00000017_6.tif	control	1HR	19.385	15.651	4.62002	5.246	0.625975	1	0.29777	1.5621	0.186397
00000017_6.tif	control	1HR	19.573	15.688	4.62002	5.37676	0.756738	1	0.29777	1.60104	0.225334
0000020_15.tif	predator	1HR	6.589	7.016	4.79179	8.65693	3.86514	1	0.29777	2.57777	1.15092
0000020_15.tif	predator	1HR	8.776	14.411	4.79179	5.84736	1.05557	1	0.29777	1.74117	0.314318
0000020_15.tif	predator	1HR	7.698	15.943	4.79179	7.57107	2.77928	1	0.29777	2.25444	0.827585
0000020_15.tif	predator	1HR	7.755	17.401	4.79179	8.44585	3.65406	1	0.29777	2.51492	1.08807
0000020_15.tif	predator	1HR	6.609	18.068	4.79179	9.74264	4.95085	1	0.29777	2.90107	1.47421
0000020_15.tif	predator	1HR	6.75	18.125	4.79179	9.67553	4.88374	1	0.29777	2.88108	1.45423
0000020_15.tif	predator	1HR	9.833	18.125	4.79179	7.67653	2.88473	1	0.29777	2.28584	0.858987
0000020_15.tif	predator	1HR	9.432	12.62	4.79179	4.59405	-0.197748	0	0.29777	1.36797	-0.0588835
0000020_15.tif	predator	1HR	9.104	10.708	4.79179	4.89958	0.107784	1	0.29777	1.45895	0.0320948
0000020_15.tif	predator	1HR	9.068	10.531	4.79179	4.97088	0.179086	1	0.29777	1.48018	0.0533263
0000020_15.tif	predator	1HR	9.474	9.495	4.79179	4.92718	0.135391	1	0.29777	1.46717	0.0403155
0000020_15.tif	predator	1HR	8.844	9.229	4.79179	5.61036	0.818567	1	0.29777	1.6706	0.243745
0000020_15.tif	predator	1HR	8.943	9.109	4.79179	5.57413	0.782337	1	0.29777	1.65981	0.232957
0000020_15.tif	predator	1HR	8.729	9.089	4.79179	5.77465	0.982862	1	0.29777	1.71952	0.292667
0000020_15.tif	predator	1HR	10.26	7.323	4.79179	5.64631	0.85452	1	0.29777	1.6813	0.25445
0000020_15.tif	predator	1HR	10.802	6.469	4.79179	6.02392	1.23212	1	0.29777	1.79374	0.366889
0000020_15.tif	predator	1HR	18.24	7.469	4.79179	5.99672	1.20493	1	0.29777	1.78564	0.358791
0000020_15.tif	predator	1HR	17.021	14.234	4.79179	4.05484	-0.736957	0	0.29777	1.20741	-0.219444
0000020_15.tif	predator	1HR	16.906	13.974	4.79179	3.80157	-0.990225	0	0.29777	1.13199	-0.294859
0000020_15.tif	predator	1HR	17.135	13.542	4.79179	3.74572	-1.04607	0	0.29777	1.11536	-0.311489
0000020_15.tif	predator	1HR	19.198	7.724	4.79179	6.56557	1.77378	1	0.29777	1.95503	0.528179
0000020_15.tif	predator	1HR	19.286	7.891	4.79179	6.53979	1.748	1	0.29777	1.94735	0.520502
0000020_15.tif	predator	1HR	19.375	8.052	4.79179	6.5235	1.73171	1	0.29777	1.9425	0.515651
0000020_15.tif	predator	1HR	20.115	9.37	4.79179	6.59547	1.80368	1	0.29777	1.96393	0.537081
0000020_15.tif	predator	1HR	20.365	9.385	4.79179	6.826	2.03421	1	0.29777	2.03258	0.605726
0000020_15.tif	predator	1HR	20.807	8.969	4.79179	7.3842	2.59241	1	0.29777	2.19879	0.771941
00000023_9.tif	predator	1HR	8.859	9.026	4.53139	7.37485	2.84346	1	0.29777	2.19601	0.846697
00000023_9.tif	predator	1HR	8.875	9.224	4.53139	7.3102	2.7788	1	0.29777	2.17676	0.827444
00000023_9.tif	predator	1HR	10.146	8.589	4.53139	6.29196	1.76057	1	0.29777	1.87356	0.524244
00000023_9.tif	predator	1HR	11.099	10.406	4.53139	4.91001	0.378612	1	0.29777	1.46205	0.112739
00000023_9.tif	predator	1HR	11.896	9.104	4.53139	4.48009	-0.0513022	0	0.29777	1.33404	-0.0152763
00000023_9.tif	predator	1HR	12.182	8.37	4.53139	4.58948	0.0580821	1	0.29777	1.36661	0.0172951
00000023_9.tif	predator	1HR	12.688	8.26	4.53139	4.24924	-0.282156	0	0.29777	1.2653	-0.0840176
00000023_9.tif	predator	1HR	13.885	7.599	4.53139	3.94976	-0.58163	0	0.29777	1.17612	-0.173192
00000023_9.tif	predator	1HR	15.182	18.281	4.53139	7.37618	2.84479	1	0.29777	2.19641	0.847093
00000023_9.tif	predator	1HR	15.266	18.75	4.53139	7.83451	3.30312	1	0.29777	2.33288	0.983569
00000023_9.tif	predator	1HR	15.406	18.839	4.53139	7.91178	3.38038	1	0.29777	2.35589	1.00658
00000023_9.tif	predator	1HR	15.542	19.885	4.53139	8.94768	4.41628	1	0.29777	2.66435	1.31504
00000023_9.tif	predator	1HR	19.005	18.807	4.53139	8.42143	3.89004	1	0.29777	2.50765	1.15834
00000023_9.tif	predator	1HR	18.875	18.766	4.53139	8.33714	3.80575	1	0.29777	2.48255	1.13324
00000027_2.tif	control	1HR	8.859	14.802	4.67199	5.96442	1.29244	1	0.29777	1.77603	0.384849
00000027_2.tif	control	1HR	8.443	15.151	4.67199	6.48696	1.81497	1	0.29777	1.93162	0.540445
00000027_2.tif	control	1HR	8.281	15.182	4.67199	6.64709	1.9751	1	0.29777	1.9793	0.588126
00000027_2.tif	control	1HR	10.839	14.193	4.67199	3.91274	-0.759244	0	0.29777	1.1651	-0.22608
00000027_2.tif	control	1HR	11.021	13.672	4.67199	3.53536	-1.13663	0	0.29777	1.05272	-0.338454
00000027_2.tif	control	1HR	11.307	13.5	4.67199	3.20757	-1.46441	0	0.29777	0.955119	-0.436059
00000027_2.tif	control	1HR	10.436	11.738	4.67199	3.95165	-0.720339	0	0.29777	1.17668	-0.214495
00000027_2.tif	control	1HR	10.481	11.8	4.67199	3.89696	-0.775028	0	0.29777	1.1604	-0.23078
00000027_2.tif	control	1HR	11.002	12.22	4.67199	3.33213	-1.33986	0	0.29777	0.992208	-0.39897
00000027_2.tif	control	1HR	11.283	14.436	4.67199	3.65078	-1.0212	0	0.29777	1.08709	-0.304084
00000027_2.tif	control	1HR	12.422	14.373	4.67199	2.7275	-1.94449	0	0.29777	0.812167	-0.579011
00000027_2.tif	control	1HR	12.214	15.033	4.67199	3.35951	-1.31248	0	0.29777	1.00036	-0.390816
00000027_2.tif	control	1HR	12.193	15.113	4.67199	3.43507	-1.23692	0	0.29777	1.02286	-0.368317
00000027_2.tif	control	1HR	12.665	14.905	4.67199	2.98845	-1.68353	0	0.29777	0.889872	-0.501306
00000027_2.tif	control	1HR	12.832	15.297	4.67199	3.24093	-1.43106	0	0.29777	0.965052	-0.426125
00000027_2.tif	control	1HR	13.179	14.901	4.67199	2.73233	-1.93965	0	0.29777	0.813607	-0.577571
00000027_2.tif	control	1HR	13.273	14.859	4.67199	2.65556	-2.01643	0	0.29777	0.790746	-0.600432
00000027_2.tif	control	1HR	15.641	14.248	4.67199	2.24905	-2.42293	0	0.29777	0.669701	-0.721477
00000027_2.tif	control	1HR	13.932	12.561	4.67199	0.419687	-4.2523	0	0.29777	0.12497	-1.26621
00000027_2.tif	control	1HR	13.283	12.172	4.67199	1.07449	-3.5975	0	0.29777	0.31995	-1.07123
00000027_2.tif	control	1HR	13.21	12.092	4.67199	1.16569	-3.5063	0	0.29777	0.347106	-1.04407
00000027_2.tif	control	1HR	13.432	12.182	4.67199	0.927586	-3.7444	0	0.29777	0.276207	-1.11497
00000027_2.tif	control	1HR	12.46	12.21	4.67199	1.87999	-2.792	0	0.29777	0.559805	-0.831373
00000027_2.tif	control	1HR	13.62	11.814	4.67199	0.933235	-3.73875	0	0.29777	0.277889	-1.11329
00000027_2.tif	control	1HR	13.469	9.755	4.67199	2.80192	-1.87006	0	0.29777	0.834328	-0.556849
00000027_2.tif	control	1HR	14.667	8.797	4.67199	3.64082	-1.03117	0	0.29777	1.08413	-0.307052
00000027_2.tif	control	1HR	16.302	11.5	4.67199	2.17871	-2.49328	0	0.29777	0.648753	-0.742424
00000027_2.tif	control	1HR	16.411	11.479	4.67199	2.28651	-2.38547	0	0.29777	0.680855	-0.710323
00000027_2.tif	control	1HR	15.936	12.665	4.67199	1.62626	-3.04573	0	0.29777	0.484251	-0.906927
00000027_2.tif	control	1HR	16.175	12.863	4.67199	1.89892	-2.77307	0	0.29777	0.565441	-0.825737
00000027_2.tif	control	1HR	16.47	14.214	4.67199	2.79275	-1.87924	0	0.29777	0.831596	-0.559582
00000027_2.tif	control	1HR	16.634	14.245	4.67199	2.93955	-1.73244	0	0.29777	0.87531	-0.515867
00000027_2.tif	control	1HR	16.7	14.731	4.67199	3.31027	-1.36172	0	0.29777	0.985698	-0.40548
00000027_2.tif	control	1HR	16.123	15.231	4.67199	3.33354	-1.33844	0	0.29777	0.992629	-0.398549
00000027_2.tif	control	1HR	15.974	15.571	4.67199	3.55324	-1.11875	0	0.29777	1.05805	-0.333129
00000027_2.tif	control	1HR	16.648	15.408	4.67199	3.78135	-0.890639	0	0.29777	1.12597	-0.265205
00000027_2.tif	control	1HR	17.453	15.311	4.67199	4.25581	-0.416174	0	0.29777	1.26725	-0.123924
00000027_2.tif	control	1HR	17.356	14.679	4.67199	3.77662	-0.895371	0	0.29777	1.12456	-0.266614
00000027_2.tif	control	1HR	18.342	13.964	4.67199	4.3	-0.371992	0	0.29777	1.28041	-0.110768
00000027_2.tif	control	1HR	18.363	13.818	4.67199	4.26967	-0.402322	0	0.29777	1.27138	-0.119799
00000027_2.tif	control	1HR	18.589	13.502	4.67199	4.39574	-0.276248	0	0.29777	1.30892	-0.0822584
00000027_2.tif	control	1HR	18.505	13.415	4.67199	4.29341	-0.378576	0	0.29777	1.27845	-0.112729
0000033_16.tif	predator	1HR	4.938	14.641	4.99994	9.34565	4.3457	1	0.29777	2.78285	1.29402
0000033_16.tif	predator	1HR	5.516	14.266	4.99994	8.67669	3.67675	1	0.29777	2.58366	1.09482
0000033_16.tif	predator	1HR	5.62	14.198	4.99994	8.55649	3.55655	1	0.29777	2.54787	1.05903
0000033_16.tif	predator	1HR	5.932	14.391	4.99994	8.32603	3.32609	1	0.29777	2.47924	0.990409
0000033_16.tif	predator	1HR	6.083	14.495	4.99994	8.2219	3.22196	1	0.29777	2.44824	0.959403
0000033_16.tif	predator	1HR	6.51	14.802	4.99994	7.94834	2.9484	1	0.29777	2.36678	0.877944
0000033_16.tif	predator	1HR	6.703	13.589	4.99994	7.34052	2.34058	1	0.29777	2.18579	0.696955
0000033_16.tif	predator	1HR	8.443	9.938	4.99994	5.5225	0.522562	1	0.29777	1.64444	0.155603
0000033_16.tif	predator	1HR	8.911	10.625	4.99994	4.90763	-0.0923087	0	0.29777	1.46135	-0.0274868
0000033_16.tif	predator	1HR	9.016	10.557	4.99994	4.8172	-0.182741	0	0.29777	1.43442	-0.0544149
0000033_16.tif	predator	1HR	12.458	1.365	4.99994	10.2158	5.21582	1	0.29777	3.04195	1.55311
0000033_16.tif	predator	1HR	13.578	8.047	4.99994	3.4568	-1.54314	0	0.29777	1.02933	-0.459502
0000033_16.tif	predator	1HR	13.016	8.667	4.99994	2.92405	-2.07589	0	0.29777	0.870694	-0.618139
0000033_16.tif	predator	1HR	12.167	13.87	4.99994	2.84451	-2.15543	0	0.29777	0.847009	-0.641823
0000033_16.tif	predator	1HR	13.302	14.698	4.99994	3.22786	-1.77209	0	0.29777	0.961158	-0.527674
0000033_16.tif	predator	1HR	13.266	14.807	4.99994	3.3408	-1.65915	0	0.29777	0.994789	-0.494044
0000033_16.tif	predator	1HR	10.479	18.755	4.99994	7.95419	2.95425	1	0.29777	2.36852	0.879687
0000033_16.tif	predator	1HR	9.385	19.188	4.99994	8.8358	3.83586	1	0.29777	2.63104	1.1422
0000033_16.tif	predator	1HR	9.448	19.672	4.99994	9.23054	4.2306	1	0.29777	2.74858	1.25974
0000033_16.tif	predator	1HR	18.651	11.229	4.99994	4.91847	-0.0814707	0	0.29777	1.46457	-0.0242595
0000033_16.tif	predator	1HR	18.714	12.458	4.99994	5.06542	0.0654739	1	0.29777	1.50833	0.0194962
00000034_7.tif	control	1HR	13.917	14.844	4.82288	4.07002	-0.752857	0	0.29777	1.21193	-0.224178
00000034_7.tif	control	1HR	11.073	13.286	4.82288	3.97239	-0.850487	0	0.29777	1.18286	-0.253249
00000034_7.tif	control	1HR	11.13	13.245	4.82288	3.9023	-0.920577	0	0.29777	1.16199	-0.27412
00000034_7.tif	control	1HR	12.016	12.854	4.82288	2.97942	-1.84346	0	0.29777	0.887181	-0.548928
00000034_7.tif	control	1HR	13.708	12.484	4.82288	1.76094	-3.06194	0	0.29777	0.524355	-0.911754
00000034_7.tif	control	1HR	10.161	12.094	4.82288	4.20523	-0.617646	0	0.29777	1.25219	-0.183917
00000034_7.tif	control	1HR	11.448	11.823	4.82288	2.90156	-1.92132	0	0.29777	0.863996	-0.572113
00000034_7.tif	control	1HR	11.453	11.74	4.82288	2.86808	-1.9548	0	0.29777	0.854029	-0.582081
00000034_7.tif	control	1HR	12.969	11.339	4.82288	1.31161	-3.51127	0	0.29777	0.390559	-1.04555
00000034_7.tif	control	1HR	13.052	11.328	4.82288	1.23208	-3.5908	0	0.29777	0.366877	-1.06923
00000034_7.tif	control	1HR	13.51	10.776	4.82288	0.646019	-4.17686	0	0.29777	0.192365	-1.24374
00000034_7.tif	control	1HR	13.547	10.688	4.82288	0.61606	-4.20682	0	0.29777	0.183444	-1.25266
00000034_7.tif	control	1HR	13.672	10.688	4.82288	0.492854	-4.33003	0	0.29777	0.146757	-1.28935
00000034_7.tif	control	1HR	11.396	10.302	4.82288	2.80126	-2.02162	0	0.29777	0.83413	-0.601979
00000034_7.tif	control	1HR	11.406	10.234	4.82288	2.80387	-2.01901	0	0.29777	0.83491	-0.6012
00000034_7.tif	control	1HR	10.5	10.365	4.82288	3.67959	-1.14329	0	0.29777	1.09567	-0.340437
00000034_7.tif	control	1HR	10.396	10.276	4.82288	3.79376	-1.02912	0	0.29777	1.12967	-0.306441
00000034_7.tif	control	1HR	10.745	9.729	4.82288	3.56954	-1.25334	0	0.29777	1.0629	-0.373207
00000034_7.tif	control	1HR	11.151	9.484	4.82288	3.27295	-1.54993	0	0.29777	0.974588	-0.461521
00000034_7.tif	control	1HR	11.057	9.469	4.82288	3.36529	-1.4576	0	0.29777	1.00208	-0.434028
00000034_7.tif	control	1HR	13.068	9.943	4.82288	1.37331	-3.44957	0	0.29777	0.408931	-1.02718
00000034_7.tif	control	1HR	13.375	9.594	4.82288	1.42089	-3.40199	0	0.29777	0.423099	-1.01301
00000034_7.tif	control	1HR	13.328	8.823	4.82288	2.12588	-2.697	0	0.29777	0.633022	-0.803087
00000034_7.tif	control	1HR	13.234	8.849	4.82288	2.14073	-2.68215	0	0.29777	0.637444	-0.798665
00000034_7.tif	control	1HR	13.031	8.625	4.82288	2.43186	-2.39102	0	0.29777	0.724136	-0.711973
00000034_7.tif	control	1HR	12.068	7.917	4.82288	3.54433	-1.27856	0	0.29777	1.05539	-0.380715
00000034_7.tif	control	1HR	13.724	7.714	4.82288	3.09728	-1.72561	0	0.29777	0.922276	-0.513834
00000034_7.tif	control	1HR	13.641	7.698	4.82288	3.12572	-1.69716	0	0.29777	0.930745	-0.505364
00000034_7.tif	control	1HR	13.693	7.078	4.82288	3.73183	-1.09105	0	0.29777	1.11123	-0.324881
00000034_7.tif	control	1HR	16.286	7.25	4.82288	4.1237	-0.699185	0	0.29777	1.22791	-0.208196
00000034_7.tif	control	1HR	16.286	7.323	4.82288	4.06136	-0.761518	0	0.29777	1.20935	-0.226757
00000034_7.tif	control	1HR	16.161	7.516	4.82288	3.83148	-0.991399	0	0.29777	1.1409	-0.295209
00000034_7.tif	control	1HR	15.948	8.312	4.82288	3.05077	-1.77211	0	0.29777	0.908429	-0.52768
00000034_7.tif	control	1HR	15.854	8.318	4.82288	2.99158	-1.8313	0	0.29777	0.890804	-0.545305
00000034_7.tif	control	1HR	14.016	8.604	4.82288	2.1815	-2.64138	0	0.29777	0.649584	-0.786525
00000034_7.tif	control	1HR	13.917	8.724	4.82288	2.07084	-2.75204	0	0.29777	0.616633	-0.819476
00000034_7.tif	control	1HR	16.812	9.682	4.82288	2.87439	-1.94849	0	0.29777	0.855908	-0.580201
00000034_7.tif	control	1HR	16.734	9.526	4.82288	2.86725	-1.95563	0	0.29777	0.85378	-0.582329
00000034_7.tif	control	1HR	16.073	10.438	4.82288	1.94744	-2.87544	0	0.29777	0.57989	-0.856219
00000034_7.tif	control	1HR	16.646	19.318	4.82288	8.89272	4.06984	1	0.29777	2.64799	1.21188
00000034_7.tif	control	1HR	16.594	18.823	4.82288	8.40343	3.58055	1	0.29777	2.50229	1.06618
00000034_7.tif	control	1HR	16.771	18.807	4.82288	8.44126	3.61838	1	0.29777	2.51355	1.07745
00000034_7.tif	control	1HR	16.057	17.99	4.82288	7.45543	2.63255	1	0.29777	2.22	0.783895
00000034_7.tif	control	1HR	17.661	17.068	4.82288	7.19801	2.37513	1	0.29777	2.14335	0.707243
00000034_7.tif	control	1HR	17.021	13.979	4.82288	4.29365	-0.529231	0	0.29777	1.27852	-0.157589
00000034_7.tif	control	1HR	17.078	13.953	4.82288	4.31273	-0.510147	0	0.29777	1.2842	-0.151907
00000034_7.tif	control	1HR	17.609	10.484	4.82288	3.46575	-1.35713	0	0.29777	1.032	-0.404113
00000034_7.tif	control	1HR	17.547	10.5	4.82288	3.40262	-1.42026	0	0.29777	1.0132	-0.42291
00000034_7.tif	control	1HR	18.562	10.344	4.82288	4.42762	-0.395262	0	0.29777	1.31841	-0.117697
00000034_7.tif	control	1HR	18.62	10.297	4.82288	4.49016	-0.332719	0	0.29777	1.33704	-0.0990737
00000034_7.tif	control	1HR	18.271	9.896	4.82288	4.20909	-0.613789	0	0.29777	1.25334	-0.182768
00000034_7.tif	control	1HR	17.896	9.562	4.82288	3.93364	-0.889236	0	0.29777	1.17132	-0.264788
00000034_7.tif	control	1HR	17.844	9.365	4.82288	3.95049	-0.872387	0	0.29777	1.17634	-0.259771
00000034_7.tif	control	1HR	17.594	9.375	4.82288	3.71439	-1.10849	0	0.29777	1.10603	-0.330076
00000034_7.tif	control	1HR	17.714	9.13	4.82288	3.92239	-0.900488	0	0.29777	1.16797	-0.268138
00000034_7.tif	control	1HR	17.042	9.411	4.82288	3.19467	-1.62821	0	0.29777	0.951276	-0.484833
00000035_1.tif	control	1HR	12.635	14.406	4.16665	3.238	-0.928645	0	0.29777	0.96418	-0.276523
00000035_1.tif	control	1HR	12.589	14.422	4.16665	3.26832	-0.898331	0	0.29777	0.973206	-0.267496
00000035_1.tif	control	1HR	12.323	14.458	4.16665	3.40003	-0.766614	0	0.29777	1.01243	-0.228275
00000035_1.tif	control	1HR	12.109	14.271	4.16665	3.32574	-0.840903	0	0.29777	0.990307	-0.250396
00000035_1.tif	control	1HR	13.203	14.161	4.16665	2.85845	-1.3082	0	0.29777	0.851159	-0.389543
00000035_1.tif	control	1HR	13.141	14.115	4.16665	2.82447	-1.34217	0	0.29777	0.841043	-0.399659
00000035_1.tif	control	1HR	13.625	14.448	4.16665	3.10464	-1.06201	0	0.29777	0.924468	-0.316234
00000035_1.tif	control	1HR	12.042	13.833	4.16665	2.98403	-1.18262	0	0.29777	0.888555	-0.352147
00000035_1.tif	control	1HR	12.052	13.75	4.16665	2.90952	-1.25712	0	0.29777	0.866369	-0.374333
00000035_1.tif	control	1HR	12.146	13.609	4.16665	2.74007	-1.42658	0	0.29777	0.815911	-0.424791
00000035_1.tif	control	1HR	13.266	12.88	4.16665	1.59292	-2.57373	0	0.29777	0.474322	-0.76638
00000035_1.tif	control	1HR	12.135	12.375	4.16665	1.86407	-2.30257	0	0.29777	0.555065	-0.685637
00000035_1.tif	control	1HR	11.188	12.375	4.16665	2.70425	-1.4624	0	0.29777	0.805244	-0.435458
00000035_1.tif	control	1HR	11.135	12.484	4.16665	2.79596	-1.37068	0	0.29777	0.832554	-0.408148
00000035_1.tif	control	1HR	10.016	12.724	4.16665	3.92275	-0.243894	0	0.29777	1.16808	-0.0726243
00000035_1.tif	control	1HR	9.667	12.068	4.16665	4.08566	-0.0809862	0	0.29777	1.21659	-0.0241152
00000035_1.tif	control	1HR	10.016	12.12	4.16665	3.7531	-0.413546	0	0.29777	1.11756	-0.123142
00000035_1.tif	control	1HR	10.828	11.526	4.16665	2.86579	-1.30086	0	0.29777	0.853345	-0.387357
00000035_1.tif	control	1HR	11.552	11.266	4.16665	2.13742	-2.02922	0	0.29777	0.636461	-0.604242
00000035_1.tif	control	1HR	11.24	10.943	4.16665	2.48063	-1.68602	0	0.29777	0.738656	-0.502046
00000035_1.tif	control	1HR	14.052	10.906	4.16665	0.569509	-3.59714	0	0.29777	0.169583	-1.07112
00000035_1.tif	control	1HR	13.656	10.568	4.16665	0.77666	-3.38999	0	0.29777	0.231266	-1.00944
00000035_1.tif	control	1HR	10.828	10.177	4.16665	3.08893	-1.07772	0	0.29777	0.919791	-0.320911
00000035_1.tif	control	1HR	10.865	9.786	4.16665	3.22439	-0.942256	0	0.29777	0.960127	-0.280575
00000035_1.tif	control	1HR	10.849	9.724	4.16665	3.26869	-0.897958	0	0.29777	0.973317	-0.267385
00000035_1.tif	control	1HR	10.844	9.651	4.16665	3.30977	-0.856875	0	0.29777	0.985551	-0.255152
00000035_1.tif	control	1HR	10.661	9.693	4.16665	3.44797	-0.718671	0	0.29777	1.0267	-0.213999
00000035_1.tif	control	1HR	10.552	9.672	4.16665	3.55388	-0.612764	0	0.29777	1.05824	-0.182463
00000035_1.tif	control	1HR	11.417	9.625	4.16665	2.84823	-1.31842	0	0.29777	0.848117	-0.392585
00000035_1.tif	control	1HR	11.323	9.625	4.16665	2.92373	-1.24292	0	0.29777	0.870599	-0.370104
00000035_1.tif	control	1HR	11.406	9.333	4.16665	3.04165	-1.12499	0	0.29777	0.905713	-0.33499
00000035_1.tif	control	1HR	11.646	9.417	4.16665	2.80768	-1.35896	0	0.29777	0.836044	-0.404658
00000035_1.tif	control	1HR	11.75	8.932	4.16665	3.09412	-1.07252	0	0.29777	0.921337	-0.319366
00000035_1.tif	control	1HR	12.328	9.297	4.16665	2.4576	-1.70904	0	0.29777	0.7318	-0.508902
00000035_1.tif	control	1HR	12.203	9.266	4.16665	2.55408	-1.61257	0	0.29777	0.760527	-0.480175
00000035_1.tif	control	1HR	12.682	9.328	4.16665	2.25306	-1.91358	0	0.29777	0.670895	-0.569808
00000035_1.tif	control	1HR	14.682	7.375	4.16665	4.09158	-0.0750697	0	0.29777	1.21835	-0.0223535
00000035_1.tif	control	1HR	14.661	7.479	4.16665	3.98559	-0.181053	0	0.29777	1.18679	-0.0539121
00000035_1.tif	control	1HR	14.812	7.479	4.16665	4.02512	-0.141525	0	0.29777	1.19856	-0.0421419
00000035_1.tif	control	1HR	15.281	8.057	4.16665	3.65267	-0.513973	0	0.29777	1.08766	-0.153046
00000035_1.tif	control	1HR	15.516	8.089	4.16665	3.73318	-0.433469	0	0.29777	1.11163	-0.129074
00000035_1.tif	control	1HR	15.667	7.938	4.16665	3.9392	-0.227449	0	0.29777	1.17297	-0.0677274
00000035_1.tif	control	1HR	15.115	8.469	4.16665	3.20967	-0.95698	0	0.29777	0.955742	-0.28496
00000035_1.tif	control	1HR	14.995	10.375	4.16665	1.62702	-2.53962	0	0.29777	0.484479	-0.756223
00000035_1.tif	control	1HR	17.536	10.422	4.16665	3.95692	-0.20973	0	0.29777	1.17825	-0.0624512
00000035_1.tif	control	1HR	17.453	10.516	4.16665	3.85497	-0.311674	0	0.29777	1.1479	-0.0928072
00000035_1.tif	control	1HR	17.594	11.406	4.16665	3.90649	-0.260154	0	0.29777	1.16324	-0.0774661
00000035_1.tif	control	1HR	17.521	11.495	4.16665	3.83597	-0.330673	0	0.29777	1.14224	-0.0984645
00000035_1.tif	control	1HR	15.443	12.786	4.16665	2.27143	-1.89522	0	0.29777	0.676363	-0.564339
00000035_1.tif	control	1HR	15.604	12.885	4.16665	2.45881	-1.70784	0	0.29777	0.732159	-0.508543
00000035_1.tif	control	1HR	16.021	13.208	4.16665	2.9862	-1.18045	0	0.29777	0.889201	-0.351502
00000035_1.tif	control	1HR	15.901	13.182	4.16665	2.87674	-1.28991	0	0.29777	0.856606	-0.384096
00000035_1.tif	control	1HR	15.411	13.375	4.16665	2.6634	-1.50325	0	0.29777	0.79308	-0.447622
00000035_1.tif	control	1HR	15.271	13.354	4.16665	2.55851	-1.60813	0	0.29777	0.761848	-0.478854
00000035_1.tif	control	1HR	14.594	13.312	4.16665	2.16653	-2.00011	0	0.29777	0.645128	-0.595574
00000035_1.tif	control	1HR	14.562	14.005	4.16665	2.80086	-1.36579	0	0.29777	0.834011	-0.406691
00000035_1.tif	control	1HR	14.375	14	4.16665	2.74341	-1.42323	0	0.29777	0.816906	-0.423797
00000035_1.tif	control	1HR	14.656	14.38	4.16665	3.18658	-0.980062	0	0.29777	0.948869	-0.291833
00000035_1.tif	control	1HR	15.302	13.911	4.16665	3.03224	-1.13441	0	0.29777	0.90291	-0.337792
0000041_11.tif	predator	1HR	9.76	12.339	4.96897	4.4756	-0.493371	0	0.29777	1.3327	-0.146911
0000041_11.tif	predator	1HR	9.865	12.339	4.96897	4.37174	-0.597228	0	0.29777	1.30177	-0.177836
0000041_11.tif	predator	1HR	12.727	7.557	4.96897	4.38174	-0.587226	0	0.29777	1.30475	-0.174858
0000041_11.tif	predator	1HR	14.561	5.155	4.96897	6.54364	1.57467	1	0.29777	1.9485	0.468889
0000041_11.tif	predator	1HR	13.866	9.908	4.96897	1.80889	-3.16008	0	0.29777	0.538633	-0.940977
0000041_11.tif	predator	1HR	13.811	10.484	4.96897	1.26164	-3.70733	0	0.29777	0.37568	-1.10393
0000041_11.tif	predator	1HR	14.363	10.686	4.96897	1.01717	-3.9518	0	0.29777	0.302882	-1.17673
0000041_11.tif	predator	1HR	15.568	15.502	4.96897	4.05598	-0.912987	0	0.29777	1.20775	-0.27186
0000041_11.tif	predator	1HR	16.002	15.151	4.96897	3.90934	-1.05963	0	0.29777	1.16409	-0.315525
0000041_11.tif	predator	1HR	17.092	13.873	4.96897	3.6342	-1.33477	0	0.29777	1.08216	-0.397453
0000041_11.tif	predator	1HR	16.477	12.411	4.96897	2.40047	-2.5685	0	0.29777	0.714788	-0.764823
0000041_11.tif	predator	1HR	16.391	11.175	4.96897	2.26194	-2.70703	0	0.29777	0.673538	-0.806072
0000041_11.tif	predator	1HR	15.495	9.845	4.96897	2.2594	-2.70957	0	0.29777	0.672782	-0.806828
0000041_11.tif	predator	1HR	15.908	8.748	4.96897	3.40617	-1.5628	0	0.29777	1.01426	-0.465355
0000041_11.tif	predator	1HR	17.38	8.807	4.96897	4.29989	-0.669083	0	0.29777	1.28038	-0.199233
0000041_11.tif	predator	1HR	17.224	8.668	4.96897	4.28225	-0.686716	0	0.29777	1.27513	-0.204483
0000041_11.tif	predator	1HR	17.672	8.411	4.96897	4.78299	-0.185981	0	0.29777	1.42423	-0.0553795
0000041_11.tif	predator	1HR	17.849	9.911	4.96897	4.06948	-0.899492	0	0.29777	1.21177	-0.267842
0000041_11.tif	predator	1HR	18.547	10.167	4.96897	4.61674	-0.352226	0	0.29777	1.37473	-0.104882
0000041_11.tif	predator	1HR	19.068	10.266	4.96897	5.08296	0.11399	1	0.29777	1.51355	0.0339429
0000041_11.tif	predator	1HR	18.755	11.526	4.96897	4.56987	-0.399098	0	0.29777	1.36077	-0.118839
0000041_11.tif	predator	1HR	18.417	12.24	4.96897	4.26487	-0.704096	0	0.29777	1.26995	-0.209659
0000041_11.tif	predator	1HR	18.922	13.13	4.96897	4.94875	-0.0202205	0	0.29777	1.47359	-0.00602106
0000041_11.tif	predator	1HR	19.797	13.208	4.96897	5.81131	0.842336	1	0.29777	1.73043	0.250823
0000041_11.tif	predator	1HR	19.917	13.344	4.96897	5.96354	0.994567	1	0.29777	1.77576	0.296152
0000041_11.tif	predator	1HR	19.948	13.26	4.96897	5.97066	1.00169	1	0.29777	1.77788	0.298273
0000041_11.tif	predator	1HR	19.755	13.615	4.96897	5.89108	0.92211	1	0.29777	1.75419	0.274577
0000041_11.tif	predator	1HR	19.031	14.208	4.96897	5.4594	0.49043	1	0.29777	1.62565	0.146035
0000044_12.tif	predator	1HR	9.113	13.911	4.98429	5.62882	0.644536	1	0.29777	1.6761	0.191923
0000044_12.tif	predator	1HR	9.547	13.727	4.98429	5.15898	0.174696	1	0.29777	1.53619	0.0520193
0000044_12.tif	predator	1HR	9.825	13.884	4.98429	4.9937	0.00940874	1	0.29777	1.48697	0.00280164
0000044_12.tif	predator	1HR	9.88	13.905	4.98429	4.95752	-0.0267679	0	0.29777	1.4762	-0.00797069
0000044_12.tif	predator	1HR	10.332	13.536	4.98429	4.3801	-0.604191	0	0.29777	1.30426	-0.17991
0000044_12.tif	predator	1HR	10.193	12.47	4.98429	4.08193	-0.902358	0	0.29777	1.21548	-0.268695
0000044_12.tif	predator	1HR	11.175	10.123	4.98429	3.16802	-1.81626	0	0.29777	0.943343	-0.540829
0000044_12.tif	predator	1HR	10.648	9.818	4.98429	3.77207	-1.21222	0	0.29777	1.12321	-0.360962
0000044_12.tif	predator	1HR	10.297	9.818	4.98429	4.0965	-0.887785	0	0.29777	1.21982	-0.264356
0000044_12.tif	predator	1HR	10.252	9.911	4.98429	4.10562	-0.878671	0	0.29777	1.22253	-0.261642
0000044_12.tif	predator	1HR	11.679	11.477	4.98429	2.4352	-2.54909	0	0.29777	0.725128	-0.759043
0000044_12.tif	predator	1HR	12.54	13.227	4.98429	2.47104	-2.51325	0	0.29777	0.735802	-0.74837
0000044_12.tif	predator	1HR	12.849	12.977	4.98429	2.08324	-2.90105	0	0.29777	0.620326	-0.863846
0000044_12.tif	predator	1HR	13.977	10.578	4.98429	0.751681	-4.23261	0	0.29777	0.223828	-1.26034
0000044_12.tif	predator	1HR	15.089	10.391	4.98429	1.34897	-3.63532	0	0.29777	0.401684	-1.08249
0000044_12.tif	predator	1HR	13.668	10.255	4.98429	1.15085	-3.83344	0	0.29777	0.342688	-1.14148
0000044_12.tif	predator	1HR	13.443	10.255	4.98429	1.2544	-3.72989	0	0.29777	0.373523	-1.11065
0000044_12.tif	predator	1HR	14.161	9.863	4.98429	1.45593	-3.52836	0	0.29777	0.433532	-1.05064
0000044_12.tif	predator	1HR	14.839	8.953	4.98429	2.4751	-2.50919	0	0.29777	0.737011	-0.747161
0000044_12.tif	predator	1HR	12.623	8.793	4.98429	2.92982	-2.05447	0	0.29777	0.872411	-0.61176
0000044_12.tif	predator	1HR	14.939	7.023	4.98429	4.37446	-0.609826	0	0.29777	1.30258	-0.181588
0000044_12.tif	predator	1HR	12.859	7.248	4.98429	4.25763	-0.72666	0	0.29777	1.26779	-0.216378
0000044_12.tif	predator	1HR	19.01	3.328	4.98429	9.37336	4.38907	1	0.29777	2.79111	1.30693
0000044_12.tif	predator	1HR	16.625	4.828	4.98429	6.96063	1.97634	1	0.29777	2.07267	0.588495
0000044_12.tif	predator	1HR	20.073	5.755	4.98429	8.15575	3.17146	1	0.29777	2.42854	0.944366
0000044_12.tif	predator	1HR	16.307	7.01	4.98429	4.83633	-0.147961	0	0.29777	1.44011	-0.0440582
0000044_12.tif	predator	1HR	16.075	11.866	4.98429	2.04095	-2.94334	0	0.29777	0.607732	-0.876439
0000044_12.tif	predator	1HR	16.005	13.016	4.98429	2.5452	-2.43909	0	0.29777	0.757883	-0.726289
0000044_12.tif	predator	1HR	16.606	12.877	4.98429	2.94372	-2.04057	0	0.29777	0.876552	-0.60762
0000044_12.tif	predator	1HR	16.773	12.852	4.98429	3.07409	-1.91019	0	0.29777	0.915373	-0.568799
0000044_12.tif	predator	1HR	16.839	12.884	4.98429	3.14726	-1.83703	0	0.29777	0.93716	-0.547011
0000044_12.tif	predator	1HR	19.009	14.391	4.98429	5.78389	0.799597	1	0.29777	1.72227	0.238096
0000044_12.tif	predator	1HR	20.141	14.311	4.98429	6.73373	1.74944	1	0.29777	2.0051	0.52093
0000044_12.tif	predator	1HR	20.064	14.148	4.98429	6.59325	1.60896	1	0.29777	1.96327	0.4791
0000044_12.tif	predator	1HR	19.773	12.623	4.98429	5.81239	0.828105	1	0.29777	1.73076	0.246585
0000044_12.tif	predator	1HR	19.339	12.012	4.98429	5.27584	0.291556	1	0.29777	1.57099	0.0868167
0000044_12.tif	predator	1HR	18.839	12.113	4.98429	4.79634	-0.187944	0	0.29777	1.42821	-0.0559639
0000044_14.tif	predator	1HR	8.333	5.151	5.47398	8.03162	2.55764	1	0.29777	2.39157	0.761588
0000044_14.tif	predator	1HR	8.188	5.172	5.47398	8.11157	2.63759	1	0.29777	2.41538	0.785395
0000044_14.tif	predator	1HR	6.12	6.083	5.47398	9.0673	3.59332	1	0.29777	2.69997	1.06998
0000044_14.tif	predator	1HR	5.344	7.005	5.47398	9.26175	3.78777	1	0.29777	2.75787	1.12788
0000044_14.tif	predator	1HR	5.833	7.37	5.47398	8.66077	3.18679	1	0.29777	2.57892	0.94893
0000044_14.tif	predator	1HR	6.323	7.557	5.47398	8.1389	2.66492	1	0.29777	2.42352	0.793533
0000044_14.tif	predator	1HR	10.698	14.521	5.47398	4.38498	-1.08899	0	0.29777	1.30572	-0.324269
0000044_14.tif	predator	1HR	10.698	13.521	5.47398	3.69244	-1.78154	0	0.29777	1.0995	-0.530489
0000044_14.tif	predator	1HR	12.026	12.328	5.47398	1.91358	-3.5604	0	0.29777	0.569806	-1.06018
0000044_14.tif	predator	1HR	11.75	12.214	5.47398	2.08855	-3.38543	0	0.29777	0.621906	-1.00808
0000044_14.tif	predator	1HR	11.271	11.568	5.47398	2.34339	-3.13059	0	0.29777	0.69779	-0.932196
0000044_14.tif	predator	1HR	11.115	9.974	5.47398	2.77185	-2.70212	0	0.29777	0.825375	-0.804611
0000044_14.tif	predator	1HR	10.802	9.87	5.47398	3.0985	-2.37548	0	0.29777	0.92264	-0.707346
0000044_14.tif	predator	1HR	11.333	9.5	5.47398	2.83932	-2.63466	0	0.29777	0.845463	-0.784523
0000044_14.tif	predator	1HR	10.76	9.354	5.47398	3.39119	-2.08279	0	0.29777	1.00979	-0.620193
0000044_14.tif	predator	1HR	10.292	6.995	5.47398	5.36234	-0.11164	0	0.29777	1.59674	-0.0332431
0000044_14.tif	predator	1HR	10.443	6.891	5.47398	5.35464	-0.119333	0	0.29777	1.59445	-0.0355339
0000044_14.tif	predator	1HR	15.125	8.583	5.47398	3.05519	-2.41879	0	0.29777	0.909743	-0.720243
0000044_14.tif	predator	1HR	14.557	8.693	5.47398	2.70979	-2.76418	0	0.29777	0.806895	-0.823091
0000044_14.tif	predator	1HR	13.969	9.047	5.47398	2.20992	-3.26406	0	0.29777	0.658047	-0.971939
0000044_14.tif	predator	1HR	13.547	10.146	5.47398	1.07882	-4.39516	0	0.29777	0.32124	-1.30875
0000044_14.tif	predator	1HR	16.276	12.604	5.47398	3.02066	-2.45332	0	0.29777	0.899461	-0.730525
0000044_14.tif	predator	1HR	12.849	13.922	5.47398	2.79764	-2.67633	0	0.29777	0.833054	-0.796932
0000044_14.tif	predator	1HR	12.797	13.995	5.47398	2.88196	-2.59201	0	0.29777	0.858162	-0.771824
0000044_14.tif	predator	1HR	15.125	14.354	5.47398	3.48657	-1.9874	0	0.29777	1.0382	-0.591789
0000044_14.tif	predator	1HR	13.406	20.745	5.47398	9.52276	4.04878	1	0.29777	2.83559	1.20561
0000044_14.tif	predator	1HR	13.438	20.917	5.47398	9.69418	4.2202	1	0.29777	2.88663	1.25665
0000044_14.tif	predator	1HR	18	15.781	5.47398	6.34217	0.868197	1	0.29777	1.88851	0.258523
0000044_14.tif	predator	1HR	16.62	11.906	5.47398	3.10678	-2.3672	0	0.29777	0.925106	-0.70488
0000044_14.tif	predator	1HR	18.438	10.911	5.47398	4.85909	-0.614885	0	0.29777	1.44689	-0.183094
0000044_14.tif	predator	1HR	16.635	9.964	5.47398	3.29632	-2.17766	0	0.29777	0.981545	-0.648441
0000044_14.tif	predator	1HR	16.74	9.891	5.47398	3.42136	-2.05262	0	0.29777	1.01878	-0.611208
0000044_14.tif	predator	1HR	19.193	10.724	5.47398	5.62626	0.152285	1	0.29777	1.67533	0.0453458
0000044_14.tif	predator	1HR	19.583	11.224	5.47398	5.994	0.520023	1	0.29777	1.78483	0.154847
0000044_14.tif	predator	1HR	19.708	11.135	5.47398	6.11965	0.645671	1	0.29777	1.82225	0.192261
0000044_14.tif	predator	1HR	19.182	15.177	5.47398	6.84893	1.37495	1	0.29777	2.03941	0.40942
00000048_4.tif	control	1HR	13.073	16.208	4.77612	4.53947	-0.236657	0	0.29777	1.35172	-0.0704694
00000048_4.tif	control	1HR	13.312	16.109	4.77612	4.39405	-0.382071	0	0.29777	1.30842	-0.113769
00000048_4.tif	control	1HR	14.453	15.604	4.77612	3.83438	-0.941748	0	0.29777	1.14176	-0.280424
00000048_4.tif	control	1HR	15.12	15.453	4.77612	3.80649	-0.969639	0	0.29777	1.13346	-0.288729
00000048_4.tif	control	1HR	14.995	15.302	4.77612	3.62837	-1.14775	0	0.29777	1.08042	-0.341767
00000048_4.tif	control	1HR	11.76	13.844	4.77612	3.11549	-1.66063	0	0.29777	0.9277	-0.494487
00000048_4.tif	control	1HR	11.651	12.464	4.77612	2.54016	-2.23597	0	0.29777	0.756382	-0.665804
00000048_4.tif	control	1HR	11.938	12.411	4.77612	2.24957	-2.52656	0	0.29777	0.669853	-0.752333
00000048_4.tif	control	1HR	13.651	13.167	4.77612	1.45185	-3.32428	0	0.29777	0.432317	-0.989869
00000048_4.tif	control	1HR	13.844	12.271	4.77612	0.547951	-4.22817	0	0.29777	0.163163	-1.25902
00000048_4.tif	control	1HR	15.255	12.167	4.77612	1.21717	-3.55896	0	0.29777	0.362436	-1.05975
00000048_4.tif	control	1HR	14.682	12.062	4.77612	0.645031	-4.13109	0	0.29777	0.192071	-1.23012
00000048_4.tif	control	1HR	15.068	11.443	4.77612	1.02792	-3.74821	0	0.29777	0.306082	-1.1161
00000048_4.tif	control	1HR	15.021	10.859	4.77612	1.30745	-3.46868	0	0.29777	0.389318	-1.03287
00000048_4.tif	control	1HR	14.146	11.38	4.77612	0.408711	-4.36741	0	0.29777	0.121702	-1.30048
00000048_4.tif	control	1HR	11.448	11.99	4.77612	2.65884	-2.11729	0	0.29777	0.791722	-0.630464
00000048_4.tif	control	1HR	10.208	12.135	4.77612	3.90662	-0.869504	0	0.29777	1.16327	-0.258912
00000048_4.tif	control	1HR	9.875	11.146	4.77612	4.27221	-0.503914	0	0.29777	1.27214	-0.150051
00000048_4.tif	control	1HR	9.99	10.771	4.77612	4.23251	-0.543618	0	0.29777	1.26031	-0.161873
00000048_4.tif	control	1HR	11.026	11.016	4.77612	3.168	-1.60812	0	0.29777	0.943336	-0.478851
00000048_4.tif	control	1HR	10.854	9.411	4.77612	4.02127	-0.754849	0	0.29777	1.19741	-0.224771
00000048_4.tif	control	1HR	11.661	9.219	4.77612	3.54024	-1.23588	0	0.29777	1.05418	-0.368008
00000048_4.tif	control	1HR	13.266	9.354	4.77612	2.5707	-2.20542	0	0.29777	0.765478	-0.656708
00000048_4.tif	control	1HR	12.703	8.552	4.77612	3.52244	-1.25369	0	0.29777	1.04888	-0.37331
00000048_4.tif	control	1HR	15.375	8.771	4.77612	3.2739	-1.50223	0	0.29777	0.974868	-0.447318
00000048_4.tif	control	1HR	15.568	8.042	4.77612	4.02188	-0.754247	0	0.29777	1.19759	-0.224592
00000048_4.tif	control	1HR	15.995	8.255	4.77612	4.00784	-0.768284	0	0.29777	1.19341	-0.228772
00000048_4.tif	control	1HR	16.255	8.266	4.77612	4.1278	-0.648324	0	0.29777	1.22914	-0.193051
00000048_4.tif	control	1HR	16.609	8.828	4.77612	3.87942	-0.896708	0	0.29777	1.15517	-0.267013
00000048_4.tif	control	1HR	16.547	8.906	4.77612	3.77983	-0.996295	0	0.29777	1.12552	-0.296667
00000048_4.tif	control	1HR	17.125	8.375	4.77612	4.55978	-0.216344	0	0.29777	1.35777	-0.0644206
00000048_4.tif	control	1HR	17.109	8.885	4.77612	4.18042	-0.595705	0	0.29777	1.2448	-0.177383
00000048_4.tif	control	1HR	17.062	8.927	4.77612	4.11743	-0.658691	0	0.29777	1.22605	-0.196139
00000048_4.tif	control	1HR	15.745	9.615	4.77612	2.72444	-2.05169	0	0.29777	0.811256	-0.610931
00000048_4.tif	control	1HR	15.411	10.109	4.77612	2.12924	-2.64688	0	0.29777	0.634024	-0.788162
00000048_4.tif	control	1HR	16.365	11.708	4.77612	2.26734	-2.50878	0	0.29777	0.675146	-0.74704
00000048_4.tif	control	1HR	15.891	14.536	4.77612	3.28234	-1.49378	0	0.29777	0.977383	-0.444804
00000048_4.tif	control	1HR	14.734	13.177	4.77612	1.52909	-3.24704	0	0.29777	0.455316	-0.96687
00000048_8.tif	control	1HR	14.146	15.13	4.56778	4.08584	-0.481937	0	0.29777	1.21664	-0.143506
00000048_8.tif	control	1HR	14.146	15.047	4.56778	4.00744	-0.56034	0	0.29777	1.19329	-0.166852
00000048_8.tif	control	1HR	13.359	14.146	4.56778	3.57318	-0.994595	0	0.29777	1.06399	-0.29616
00000048_8.tif	control	1HR	13.656	14.047	4.56778	3.32251	-1.24526	0	0.29777	0.989344	-0.370802
00000048_8.tif	control	1HR	13.677	13.99	4.56778	3.26334	-1.30444	0	0.29777	0.971725	-0.388422
00000048_8.tif	control	1HR	12.927	13.214	4.56778	3.20654	-1.36123	0	0.29777	0.954812	-0.405335
00000048_8.tif	control	1HR	13.484	13.167	4.56778	2.75207	-1.8157	0	0.29777	0.819485	-0.540662
00000048_8.tif	control	1HR	12.359	13	4.56778	3.56511	-1.00267	0	0.29777	1.06158	-0.298565
00000048_8.tif	control	1HR	12.385	12.88	4.56778	3.48524	-1.08253	0	0.29777	1.0378	-0.322346
00000048_8.tif	control	1HR	12.667	12.583	4.56778	3.1006	-1.46717	0	0.29777	0.923267	-0.43688
00000048_8.tif	control	1HR	12.698	12.51	4.56778	3.04199	-1.52578	0	0.29777	0.905814	-0.454333
00000048_8.tif	control	1HR	14.88	11.266	4.56778	0.594	-3.97378	0	0.29777	0.176875	-1.18327
00000048_8.tif	control	1HR	14.88	11.078	4.56778	0.623041	-3.94473	0	0.29777	0.185523	-1.17462
00000048_8.tif	control	1HR	14.281	10.984	4.56778	1.22588	-3.3419	0	0.29777	0.365029	-0.995117
00000048_8.tif	control	1HR	13.932	10.156	4.56778	1.89996	-2.66781	0	0.29777	0.565752	-0.794394
00000048_8.tif	control	1HR	13.865	10.057	4.56778	2.0126	-2.55518	0	0.29777	0.599292	-0.760854
00000048_8.tif	control	1HR	14.375	9.109	4.56778	2.42084	-2.14694	0	0.29777	0.720853	-0.639294
00000048_8.tif	control	1HR	14.281	9.078	4.56778	2.49211	-2.07567	0	0.29777	0.742074	-0.618072
00000048_8.tif	control	1HR	12.885	9.297	4.56778	3.25267	-1.3151	0	0.29777	0.968548	-0.391598
00000048_8.tif	control	1HR	13.5	7.609	4.56778	4.15576	-0.412018	0	0.29777	1.23746	-0.122687
00000048_8.tif	control	1HR	14.161	7.021	4.56778	4.44342	-0.124354	0	0.29777	1.32312	-0.037029
00000048_8.tif	control	1HR	16.443	8.208	4.56778	3.20785	-1.35992	0	0.29777	0.955203	-0.404944
00000048_8.tif	control	1HR	16.417	8.339	4.56778	3.07515	-1.49262	0	0.29777	0.915689	-0.444458
00000048_8.tif	control	1HR	16.531	8.339	4.56778	3.11201	-1.45577	0	0.29777	0.926662	-0.433485
00000048_8.tif	control	1HR	16.875	10.453	4.56778	1.61981	-2.94797	0	0.29777	0.482329	-0.877817
00000048_8.tif	control	1HR	17.286	10.13	4.56778	2.13865	-2.42912	0	0.29777	0.636827	-0.72332
00000048_8.tif	control	1HR	17.568	10.349	4.56778	2.28598	-2.28179	0	0.29777	0.680698	-0.679449
00000048_8.tif	control	1HR	15.031	10.562	4.56778	0.831784	-3.73599	0	0.29777	0.24768	-1.11247
00000048_8.tif	control	1HR	15.193	11.646	4.56778	0.472611	-4.09517	0	0.29777	0.140729	-1.21942
00000048_8.tif	control	1HR	15.26	11.797	4.56778	0.572501	-3.99528	0	0.29777	0.170474	-1.18967
00000048_8.tif	control	1HR	17.094	12.016	4.56778	1.78519	-2.78259	0	0.29777	0.531576	-0.828571
00000048_8.tif	control	1HR	17.474	12.703	4.56778	2.46272	-2.10506	0	0.29777	0.733323	-0.626824
00000048_8.tif	control	1HR	15.693	12.953	4.56778	1.70116	-2.86662	0	0.29777	0.506553	-0.853594
00000048_8.tif	control	1HR	15.083	12.589	4.56778	1.37957	-3.18821	0	0.29777	0.410794	-0.949352
00000048_8.tif	control	1HR	14.964	14.151	4.56778	2.92973	-1.63804	0	0.29777	0.872386	-0.487761
00000048_8.tif	control	1HR	17.453	14.609	4.56778	3.88485	-0.682922	0	0.29777	1.15679	-0.203354
00000048_8.tif	control	1HR	19.391	13.099	4.56778	4.32467	-0.243105	0	0.29777	1.28776	-0.0723894
00000048_8.tif	control	1HR	19.401	12.422	4.56778	4.09361	-0.474163	0	0.29777	1.21896	-0.141192
00000048_8.tif	control	1HR	18.854	12.151	4.56778	3.49394	-1.07383	0	0.29777	1.04039	-0.319756
00000048_8.tif	control	1HR	18.781	10.266	4.56778	3.45489	-1.11289	0	0.29777	1.02876	-0.331385
00000048_8.tif	control	1HR	19.156	9.208	4.56778	4.21811	-0.349662	0	0.29777	1.25603	-0.104119
00000048_8.tif	control	1HR	19.406	9.229	4.56778	4.42832	-0.139459	0	0.29777	1.31862	-0.0415266
0000005_14.tif	predator	2HRS	8.062	7.219	4.48979	7.26467	2.77488	1	0.29777	2.1632	0.826276
0000005_14.tif	predator	2HRS	11.825	7.946	4.48979	4.18304	-0.306756	0	0.29777	1.24558	-0.0913427
0000005_14.tif	predator	2HRS	11.901	7.905	4.48979	4.18292	-0.306875	0	0.29777	1.24555	-0.0913781
0000005_14.tif	predator	2HRS	12.047	8.182	4.48979	3.8698	-0.619996	0	0.29777	1.15231	-0.184616
0000005_14.tif	predator	2HRS	12.533	8.155	4.48979	3.69332	-0.79647	0	0.29777	1.09976	-0.237165
0000005_14.tif	predator	2HRS	11.512	8.835	4.48979	3.62661	-0.86318	0	0.29777	1.0799	-0.257029
0000005_14.tif	predator	2HRS	10.637	10.377	4.48979	3.44305	-1.04674	0	0.29777	1.02524	-0.311688
0000005_14.tif	predator	2HRS	11.283	10.217	4.48979	2.92127	-1.56853	0	0.29777	0.869866	-0.46706
0000005_14.tif	predator	2HRS	11.297	12.116	4.48979	2.60776	-1.88204	0	0.29777	0.776512	-0.560414
0000005_14.tif	predator	2HRS	11.262	12.484	4.48979	2.73731	-1.75248	0	0.29777	0.815089	-0.521837
0000005_14.tif	predator	2HRS	11.38	12.943	4.48979	2.81311	-1.67668	0	0.29777	0.83766	-0.499266
0000005_14.tif	predator	2HRS	11.04	13.693	4.48979	3.50464	-0.985151	0	0.29777	1.04358	-0.293349
0000005_14.tif	predator	2HRS	10.47	14.214	4.48979	4.27359	-0.216205	0	0.29777	1.27255	-0.0643795
0000005_14.tif	predator	2HRS	10.686	14.533	4.48979	4.31454	-0.175253	0	0.29777	1.28474	-0.0521849
0000005_14.tif	predator	2HRS	11.241	14.568	4.48979	3.95134	-0.538457	0	0.29777	1.17659	-0.160336
0000005_14.tif	predator	2HRS	12.089	13.936	4.48979	2.92463	-1.56517	0	0.29777	0.870866	-0.466059
0000005_14.tif	predator	2HRS	11.936	13.894	4.48979	2.98711	-1.50268	0	0.29777	0.889472	-0.447454
0000005_14.tif	predator	2HRS	9.804	12.005	4.48979	4.0698	-0.41999	0	0.29777	1.21187	-0.12506
0000005_14.tif	predator	2HRS	11.318	15.109	4.48979	4.32624	-0.163557	0	0.29777	1.28822	-0.0487024
0000005_14.tif	predator	2HRS	14.766	14.95	4.48979	3.46806	-1.02173	0	0.29777	1.03269	-0.304241
0000005_14.tif	predator	2HRS	16.55	14.144	4.48979	3.70405	-0.78574	0	0.29777	1.10296	-0.23397
0000005_14.tif	predator	2HRS	16.398	14.047	4.48979	3.52706	-0.962729	0	0.29777	1.05025	-0.286672
0000005_14.tif	predator	2HRS	14.127	10.974	4.48979	0.686607	-3.80319	0	0.29777	0.204451	-1.13247
0000005_14.tif	predator	2HRS	17.078	10.946	4.48979	3.29046	-1.19933	0	0.29777	0.979801	-0.357125
0000005_14.tif	predator	2HRS	13.627	9.932	4.48979	1.68734	-2.80245	0	0.29777	0.502439	-0.834487
0000005_14.tif	predator	2HRS	13.474	9.905	4.48979	1.74098	-2.74882	0	0.29777	0.518411	-0.818515
00000008_4.tif	control	2HRS	11.99	13.312	4.51041	2.93275	-1.57766	0	0.29777	0.873285	-0.46978
00000008_4.tif	control	2HRS	11.304	12.96	4.51041	3.27574	-1.23467	0	0.29777	0.975417	-0.367649
00000008_4.tif	control	2HRS	11.283	12.821	4.51041	3.22661	-1.28381	0	0.29777	0.960786	-0.382279
00000008_4.tif	control	2HRS	12.519	12.467	4.51041	1.98632	-2.52409	0	0.29777	0.591468	-0.751598
00000008_4.tif	control	2HRS	12.991	11.946	4.51041	1.30793	-3.20248	0	0.29777	0.389464	-0.953602
00000008_4.tif	control	2HRS	13.297	11.321	4.51041	0.838048	-3.67236	0	0.29777	0.249546	-1.09352
00000008_4.tif	control	2HRS	12.526	12.342	4.51041	1.91044	-2.59997	0	0.29777	0.568872	-0.774194
00000008_4.tif	control	2HRS	12.366	10.797	4.51041	1.84244	-2.66797	0	0.29777	0.548623	-0.794442
00000008_4.tif	control	2HRS	12.095	10.436	4.51041	2.22013	-2.29028	0	0.29777	0.661088	-0.681978
00000008_4.tif	control	2HRS	9.88	10.922	4.51041	4.27284	-0.237577	0	0.29777	1.27232	-0.0707433
00000008_4.tif	control	2HRS	10.387	10.734	4.51041	3.79231	-0.718106	0	0.29777	1.12924	-0.21383
00000008_4.tif	control	2HRS	12.283	9.797	4.51041	2.39272	-2.11769	0	0.29777	0.712481	-0.630584
00000008_4.tif	control	2HRS	12.29	9.491	4.51041	2.59231	-1.9181	0	0.29777	0.771912	-0.571154
00000008_4.tif	control	2HRS	12.144	8.905	4.51041	3.12374	-1.38668	0	0.29777	0.930155	-0.412911
00000008_4.tif	control	2HRS	11.595	8.071	4.51041	4.11773	-0.392685	0	0.29777	1.22614	-0.11693
00000008_4.tif	control	2HRS	11.63	8.009	4.51041	4.14546	-0.364953	0	0.29777	1.23439	-0.108672
00000008_4.tif	control	2HRS	16.734	7.304	4.51041	4.77691	0.266497	1	0.29777	1.42242	0.0793548
00000008_4.tif	control	2HRS	16.526	9.026	4.51041	3.30797	-1.20244	0	0.29777	0.985015	-0.358051
00000008_4.tif	control	2HRS	17.054	9.123	4.51041	3.6486	-0.861813	0	0.29777	1.08644	-0.256622
00000008_4.tif	control	2HRS	16.97	11.467	4.51041	2.83923	-1.67118	0	0.29777	0.845439	-0.497627
00000008_4.tif	control	2HRS	22.311	13.474	4.51041	8.45702	3.94661	1	0.29777	2.51825	1.17518
00000008_4.tif	control	2HRS	22.109	13.273	4.51041	8.21159	3.70118	1	0.29777	2.44516	1.1021
00000008_4.tif	control	2HRS	22.123	13.189	4.51041	8.20556	3.69515	1	0.29777	2.44337	1.10031
00000008_4.tif	control	2HRS	21.79	13.092	4.51041	7.85923	3.34881	1	0.29777	2.34024	0.997176
00000008_4.tif	control	2HRS	21.755	12.543	4.51041	7.71879	3.20838	1	0.29777	2.29842	0.955359
00000008_4.tif	control	2HRS	17.2	12.356	4.51041	3.23793	-1.27249	0	0.29777	0.964157	-0.378908
00000008_4.tif	control	2HRS	17.38	12.314	4.51041	3.39618	-1.11423	0	0.29777	1.01128	-0.331785
00000008_4.tif	control	2HRS	21.186	11.259	4.51041	7.0512	2.54079	1	0.29777	2.09964	0.75657
00000008_4.tif	control	2HRS	17.422	9.439	4.51041	3.78319	-0.727226	0	0.29777	1.12652	-0.216546
00000008_4.tif	control	2HRS	17.589	9.377	4.51041	3.95908	-0.551329	0	0.29777	1.1789	-0.164169
00000008_4.tif	control	2HRS	17.568	9.161	4.51041	4.05121	-0.459204	0	0.29777	1.20633	-0.136737
00000008_4.tif	control	2HRS	17.116	9.266	4.51041	3.61559	-0.894825	0	0.29777	1.07661	-0.266452
00000008_4.tif	control	2HRS	17.151	9.141	4.51041	3.71611	-0.794299	0	0.29777	1.10655	-0.236519
00000008_4.tif	control	2HRS	17.179	8.571	4.51041	4.09622	-0.414193	0	0.29777	1.21973	-0.123334
00000011_8.tif	control	2HRS	14.422	14.807	4.30207	3.5161	-0.785969	0	0.29777	1.04699	-0.234038
00000011_8.tif	control	2HRS	12.51	13.792	4.30207	3.20156	-1.10051	0	0.29777	0.953329	-0.327698
00000011_8.tif	control	2HRS	12.172	13.411	4.30207	3.15538	-1.14669	0	0.29777	0.939577	-0.341451
00000011_8.tif	control	2HRS	12.01	12.573	4.30207	2.80909	-1.49298	0	0.29777	0.836461	-0.444566
00000011_8.tif	control	2HRS	15.036	13.974	4.30207	2.73309	-1.56898	0	0.29777	0.813833	-0.467194
00000011_8.tif	control	2HRS	14.865	14	4.30207	2.73117	-1.5709	0	0.29777	0.81326	-0.467767
00000011_8.tif	control	2HRS	14.5	13.589	4.30207	2.29702	-2.00505	0	0.29777	0.683984	-0.597043
00000011_8.tif	control	2HRS	14.464	13.422	4.30207	2.1305	-2.17157	0	0.29777	0.634398	-0.64663
00000011_8.tif	control	2HRS	14.88	11.682	4.30207	0.537587	-3.76448	0	0.29777	0.160077	-1.12095
00000011_8.tif	control	2HRS	14.859	11.583	4.30207	0.454403	-3.84767	0	0.29777	0.135308	-1.14572
00000011_8.tif	control	2HRS	14.542	10.724	4.30207	0.568901	-3.73317	0	0.29777	0.169402	-1.11163
00000011_8.tif	control	2HRS	14.526	10.661	4.30207	0.631203	-3.67087	0	0.29777	0.187953	-1.09307
00000011_8.tif	control	2HRS	14.562	10.531	4.30207	0.762775	-3.5393	0	0.29777	0.227131	-1.0539
00000011_8.tif	control	2HRS	13.995	10.771	4.30207	0.732575	-3.5695	0	0.29777	0.218139	-1.06289
00000011_8.tif	control	2HRS	13.021	10.552	4.30207	1.66275	-2.63933	0	0.29777	0.495116	-0.785912
00000011_8.tif	control	2HRS	12.641	10.984	4.30207	1.89421	-2.40786	0	0.29777	0.564038	-0.716989
00000011_8.tif	control	2HRS	12.505	11.016	4.30207	2.02391	-2.27816	0	0.29777	0.602659	-0.678369
00000011_8.tif	control	2HRS	16.981	8.97	4.30207	3.3908	-0.91127	0	0.29777	1.00968	-0.271349
00000011_8.tif	control	2HRS	16.87	9.082	4.30207	3.23322	-1.06885	0	0.29777	0.962755	-0.318272
00000011_8.tif	control	2HRS	16.002	10.082	4.30207	1.92098	-2.38109	0	0.29777	0.57201	-0.709017
00000011_8.tif	control	2HRS	16.307	10.436	4.30207	1.99046	-2.31161	0	0.29777	0.5927	-0.688327
00000011_8.tif	control	2HRS	16.953	10.457	4.30207	2.58176	-1.72031	0	0.29777	0.76877	-0.512257
00000011_8.tif	control	2HRS	16.668	9.991	4.30207	2.51983	-1.78224	0	0.29777	0.750331	-0.530696
00000011_8.tif	control	2HRS	17.092	9.776	4.30207	2.99416	-1.30791	0	0.29777	0.89157	-0.389457
00000011_8.tif	control	2HRS	17.967	11.141	4.30207	3.4603	-0.841774	0	0.29777	1.03037	-0.250655
00000011_8.tif	control	2HRS	17.946	11.05	4.30207	3.44451	-0.857559	0	0.29777	1.02567	-0.255355
00000011_8.tif	control	2HRS	16.648	12.273	4.30207	2.35232	-1.94975	0	0.29777	0.70045	-0.580577
00000011_8.tif	control	2HRS	15.939	13.03	4.30207	2.25004	-2.05203	0	0.29777	0.669995	-0.611033
00000011_8.tif	control	2HRS	15.703	13.259	4.30207	2.30051	-2.00156	0	0.29777	0.685022	-0.596005
00000011_8.tif	control	2HRS	15.036	13.543	4.30207	2.31164	-1.99043	0	0.29777	0.688337	-0.592691
00000011_8.tif	control	2HRS	15.363	12.856	4.30207	1.78149	-2.52058	0	0.29777	0.530474	-0.750553
00000011_8.tif	control	2HRS	24.286	11.297	4.30207	9.776	5.47393	1	0.29777	2.911	1.62997
00000011_8.tif	control	2HRS	23.995	11.682	4.30207	9.49301	5.19094	1	0.29777	2.82673	1.54571
00000018_2.tif	control	2HRS	9.521	10.99	4.47915	3.63523	-0.843918	0	0.29777	1.08246	-0.251294
00000018_2.tif	control	2HRS	9.62	10.922	4.47915	3.55012	-0.929023	0	0.29777	1.05712	-0.276635
00000018_2.tif	control	2HRS	9.877	9.873	4.47915	3.66195	-0.817195	0	0.29777	1.09042	-0.243336
00000018_2.tif	control	2HRS	9.856	9.755	4.47915	3.73742	-0.741727	0	0.29777	1.11289	-0.220864
00000018_2.tif	control	2HRS	10.752	9.352	4.47915	3.25629	-1.22286	0	0.29777	0.969625	-0.364131
00000018_2.tif	control	2HRS	11.189	10.13	4.47915	2.41659	-2.06256	0	0.29777	0.719588	-0.614168
00000018_2.tif	control	2HRS	11.356	9.804	4.47915	2.50908	-1.97006	0	0.29777	0.74713	-0.586625
00000018_2.tif	control	2HRS	11.599	9.859	4.47915	2.30435	-2.17479	0	0.29777	0.686168	-0.647588
00000018_2.tif	control	2HRS	11.759	9.727	4.47915	2.30915	-2.17	0	0.29777	0.687594	-0.646161
00000018_2.tif	control	2HRS	11.661	9.54	4.47915	2.5184	-1.96075	0	0.29777	0.749904	-0.583851
00000018_2.tif	control	2HRS	11.766	9.436	4.47915	2.54764	-1.93151	0	0.29777	0.758611	-0.575145
00000018_2.tif	control	2HRS	12.064	9.964	4.47915	1.94196	-2.53719	0	0.29777	0.578257	-0.755499
00000018_2.tif	control	2HRS	13.418	10.734	4.47915	0.92493	-3.55422	0	0.29777	0.275416	-1.05834
00000018_2.tif	control	2HRS	13.384	10.595	4.47915	1.04713	-3.43202	0	0.29777	0.311804	-1.02195
00000018_2.tif	control	2HRS	15.151	4.151	4.47915	7.729	3.24985	1	0.29777	2.30146	0.967708
00000018_2.tif	control	2HRS	15.144	4.505	4.47915	7.3863	2.90715	1	0.29777	2.19942	0.865663
00000018_2.tif	control	2HRS	16.561	5.345	4.47915	7.15024	2.67109	1	0.29777	2.12913	0.795371
00000018_2.tif	control	2HRS	16.54	5.193	4.47915	7.27372	2.79457	1	0.29777	2.1659	0.83214
00000018_2.tif	control	2HRS	16.79	9.339	4.47915	4.32629	-0.152852	0	0.29777	1.28824	-0.0455149
00000018_2.tif	control	2HRS	17.352	9.068	4.47915	4.9474	0.468257	1	0.29777	1.47319	0.139433
00000018_2.tif	control	2HRS	17.575	9.061	4.47915	5.14361	0.66446	1	0.29777	1.53161	0.197856
00000018_2.tif	control	2HRS	15.179	10.498	4.47915	2.35135	-2.12779	0	0.29777	0.700162	-0.633593
00000018_2.tif	control	2HRS	14.193	10.019	4.47915	1.92306	-2.55609	0	0.29777	0.572629	-0.761127
00000018_2.tif	control	2HRS	14.047	10.019	4.47915	1.84431	-2.63484	0	0.29777	0.54918	-0.784576
00000018_2.tif	control	2HRS	15.477	11.141	4.47915	2.41775	-2.0614	0	0.29777	0.719932	-0.613823
00000018_2.tif	control	2HRS	15.158	10.932	4.47915	2.16113	-2.31801	0	0.29777	0.643521	-0.690235
00000018_2.tif	control	2HRS	15.04	13.109	4.47915	2.45217	-2.02698	0	0.29777	0.730182	-0.603574
00000018_2.tif	control	2HRS	14.936	13.005	4.47915	2.3063	-2.17285	0	0.29777	0.686747	-0.647008
00000018_2.tif	control	2HRS	13.408	13.207	4.47915	1.63157	-2.84758	0	0.29777	0.485833	-0.847922
00000018_2.tif	control	2HRS	12.04	13.998	4.47915	2.6198	-1.85935	0	0.29777	0.780097	-0.553659
00000018_2.tif	control	2HRS	12.089	15.144	4.47915	3.68264	-0.796508	0	0.29777	1.09658	-0.237176
00000018_2.tif	control	2HRS	12.095	15.311	4.47915	3.84187	-0.637281	0	0.29777	1.14399	-0.189763
00000018_2.tif	control	2HRS	11.811	15.637	4.47915	4.2352	-0.243944	0	0.29777	1.26112	-0.0726393
00000018_2.tif	control	2HRS	13.019	14.748	4.47915	3.14515	-1.334	0	0.29777	0.936531	-0.397225
00000018_2.tif	control	2HRS	10.755	13.943	4.47915	3.31492	-1.16422	0	0.29777	0.987085	-0.346671
00000018_2.tif	control	2HRS	10.72	14.075	4.47915	3.43355	-1.04559	0	0.29777	1.02241	-0.311346
0000019_16.tif	predator	2HRS	9.479	3.583	4.90112	9.42203	4.52091	1	0.29777	2.8056	1.34619
0000019_16.tif	predator	2HRS	8.047	9.182	4.90112	7.13904	2.23792	1	0.29777	2.12579	0.666386
0000019_16.tif	predator	2HRS	12.359	14.911	4.90112	4.37717	-0.523942	0	0.29777	1.30339	-0.156014
0000019_16.tif	predator	2HRS	11.807	13.432	4.90112	3.71264	-1.18848	0	0.29777	1.10551	-0.353892
0000019_16.tif	predator	2HRS	12.615	11.208	4.90112	2.24669	-2.65442	0	0.29777	0.668998	-0.790407
0000019_16.tif	predator	2HRS	12.51	10.927	4.90112	2.38132	-2.5198	0	0.29777	0.709085	-0.75032
0000019_16.tif	predator	2HRS	11.63	10.932	4.90112	3.25199	-1.64913	0	0.29777	0.968345	-0.49106
0000019_16.tif	predator	2HRS	12.344	9.964	4.90112	2.85632	-2.0448	0	0.29777	0.850525	-0.60888
0000019_16.tif	predator	2HRS	13.708	6.302	4.90112	5.14636	0.245248	1	0.29777	1.53243	0.0730274
0000019_16.tif	predator	2HRS	13.75	6.198	4.90112	5.23873	0.337613	1	0.29777	1.55994	0.100531
0000019_16.tif	predator	2HRS	18.13	11.661	4.90112	3.28893	-1.61218	0	0.29777	0.979346	-0.480059
0000019_16.tif	predator	2HRS	18.099	11.562	4.90112	3.24917	-1.65194	0	0.29777	0.967507	-0.491899
0000019_16.tif	predator	2HRS	16.661	10.5	4.90112	1.97897	-2.92214	0	0.29777	0.589278	-0.870127
0000019_16.tif	predator	2HRS	15.443	7.896	4.90112	3.47148	-1.42964	0	0.29777	1.0337	-0.425704
0000019_16.tif	predator	2HRS	21.852	17.37	4.90112	9.24818	4.34706	1	0.29777	2.75383	1.29442
0000019_16.tif	predator	2HRS	21.186	17.321	4.90112	8.72164	3.82052	1	0.29777	2.59704	1.13764
0000019_16.tif	predator	2HRS	21.13	12.53	4.90112	6.38705	1.48593	1	0.29777	1.90187	0.442466
0000019_16.tif	predator	2HRS	21.255	12.398	4.90112	6.48654	1.58543	1	0.29777	1.9315	0.472092
0000019_16.tif	predator	2HRS	21.429	12.3	4.90112	6.64298	1.74187	1	0.29777	1.97808	0.518676
0000019_16.tif	predator	2HRS	21.429	12.161	4.90112	6.62386	1.72275	1	0.29777	1.97239	0.512982
0000038_12.tif	predator	2HRS	8.938	5.688	4.43246	6.69514	2.26267	1	0.29777	1.99361	0.673756
0000038_12.tif	predator	2HRS	8.783	5.516	4.43246	6.92476	2.4923	1	0.29777	2.06199	0.742133
0000038_12.tif	predator	2HRS	9.505	4.266	4.43246	7.65169	3.21923	1	0.29777	2.27844	0.95859
0000038_12.tif	predator	2HRS	10.693	7.62	4.43246	4.12354	-0.308924	0	0.29777	1.22787	-0.0919883
0000038_12.tif	predator	2HRS	9.748	13.335	4.43246	3.66901	-0.763454	0	0.29777	1.09252	-0.227334
0000038_12.tif	predator	2HRS	10.769	14.363	4.43246	3.72113	-0.71133	0	0.29777	1.10804	-0.211813
0000038_12.tif	predator	2HRS	11.102	14.37	4.43246	3.56277	-0.869695	0	0.29777	1.06089	-0.258969
0000038_12.tif	predator	2HRS	6.137	14.266	4.43246	7.2734	2.84094	1	0.29777	2.1658	0.845947
0000038_12.tif	predator	2HRS	10.595	16.623	4.43246	5.82681	1.39435	1	0.29777	1.73505	0.415195
0000038_12.tif	predator	2HRS	14.304	19.474	4.43246	8.41869	3.98623	1	0.29777	2.50683	1.18698
0000038_12.tif	predator	2HRS	14.227	19.37	4.43246	8.30235	3.86988	1	0.29777	2.47219	1.15234
0000038_12.tif	predator	2HRS	13.755	19.682	4.43246	8.54025	4.10779	1	0.29777	2.54303	1.22318
0000038_12.tif	predator	2HRS	12.464	19.259	4.43246	8.06052	3.62806	1	0.29777	2.40018	1.08033
0000038_12.tif	predator	2HRS	11.811	18.384	4.43246	7.24008	2.80761	1	0.29777	2.15588	0.836023
0000038_12.tif	predator	2HRS	11.38	16.63	4.43246	5.59336	1.16089	1	0.29777	1.66553	0.34568
0000038_12.tif	predator	2HRS	11.839	15.28	4.43246	4.17408	-0.258381	0	0.29777	1.24292	-0.0769382
0000038_12.tif	predator	2HRS	13.95	15.071	4.43246	4.05464	-0.377826	0	0.29777	1.20735	-0.112505
0000038_12.tif	predator	2HRS	15.755	12.401	4.43246	3.24987	-1.18259	0	0.29777	0.967713	-0.352141
0000038_12.tif	predator	2HRS	15.623	8.852	4.43246	3.72472	-0.707745	0	0.29777	1.10911	-0.210745
0000038_12.tif	predator	2HRS	12.811	8.866	4.43246	2.33827	-2.09419	0	0.29777	0.696266	-0.623588
0000038_12.tif	predator	2HRS	12.658	8.741	4.43246	2.46317	-1.96929	0	0.29777	0.733459	-0.586395
0000038_12.tif	predator	2HRS	14.075	7.634	4.43246	3.81262	-0.619846	0	0.29777	1.13528	-0.184572
0000038_12.tif	predator	2HRS	13.123	7.259	4.43246	3.96314	-0.469325	0	0.29777	1.1801	-0.139751
0000038_12.tif	predator	2HRS	12.957	5.262	4.43246	5.94518	1.51272	1	0.29777	1.7703	0.450443
0000038_12.tif	predator	2HRS	12.075	3.519	4.43246	7.71221	3.27974	1	0.29777	2.29646	0.97661
0000038_12.tif	predator	2HRS	11.839	3.436	4.43246	7.8184	3.38593	1	0.29777	2.32808	1.00823
0000038_12.tif	predator	2HRS	11.464	3.429	4.43246	7.87705	3.44459	1	0.29777	2.34555	1.0257
0000038_12.tif	predator	2HRS	13.033	2.05	4.43246	9.15788	4.72542	1	0.29777	2.72694	1.40709
0000038_12.tif	predator	2HRS	16.484	5.158	4.43246	7.11369	2.68122	1	0.29777	2.11824	0.798388
0000038_12.tif	predator	2HRS	16.602	5.151	4.43246	7.18249	2.75003	1	0.29777	2.13873	0.818875
0000038_12.tif	predator	2HRS	17.033	9.943	4.43246	4.47984	0.0473815	1	0.29777	1.33396	0.0141088
0000038_12.tif	predator	2HRS	17.908	12.325	4.43246	5.29426	0.861795	1	0.29777	1.57647	0.256617
0000042_10.tif	predator	2HRS	5.229	12.354	4.63021	7.96808	3.33788	1	0.29777	2.37266	0.993919
0000042_10.tif	predator	2HRS	5.281	11.839	4.63021	7.91627	3.28606	1	0.29777	2.35723	0.978492
0000042_10.tif	predator	2HRS	7.104	17.438	4.63021	8.0982	3.46799	1	0.29777	2.4114	1.03266
0000042_10.tif	predator	2HRS	6.885	16.271	4.63021	7.56283	2.93263	1	0.29777	2.25198	0.873248
0000042_10.tif	predator	2HRS	6.943	15.979	4.63021	7.35642	2.72621	1	0.29777	2.19052	0.811784
0000042_10.tif	predator	2HRS	7.167	15.422	4.63021	6.8815	2.25129	1	0.29777	2.0491	0.670367
0000042_10.tif	predator	2HRS	7.927	15.057	4.63021	6.03991	1.4097	1	0.29777	1.7985	0.419768
0000042_10.tif	predator	2HRS	7.708	14.839	4.63021	6.1313	1.50109	1	0.29777	1.82572	0.44698
0000042_10.tif	predator	2HRS	10.134	18.825	4.63021	7.38895	2.75874	1	0.29777	2.20021	0.821471
0000042_10.tif	predator	2HRS	10.759	17.47	4.63021	5.89678	1.26657	1	0.29777	1.75588	0.377147
0000042_10.tif	predator	2HRS	9.092	16.429	4.63021	5.96382	1.33361	1	0.29777	1.77585	0.397109
0000042_10.tif	predator	2HRS	13.609	2.141	4.63021	9.96669	5.33648	1	0.29777	2.96778	1.58904
0000042_10.tif	predator	2HRS	13.589	7.12	4.63021	4.99472	0.364517	1	0.29777	1.48728	0.108542
0000042_10.tif	predator	2HRS	16.995	10.578	4.63021	4.09495	-0.535252	0	0.29777	1.21935	-0.159382
0000042_10.tif	predator	2HRS	17.297	12.016	4.63021	4.10484	-0.525367	0	0.29777	1.2223	-0.156438
0000042_10.tif	predator	2HRS	17.714	13.214	4.63021	4.65646	0.026259	1	0.29777	1.38656	0.00781914
0000042_10.tif	predator	2HRS	17.62	13.599	4.63021	4.67422	0.0440136	1	0.29777	1.39184	0.0131059
0000042_10.tif	predator	2HRS	17.453	13.432	4.63021	4.46369	-0.16652	0	0.29777	1.32915	-0.0495848
0000042_10.tif	predator	2HRS	14.786	13.193	4.63021	1.93248	-2.69772	0	0.29777	0.575435	-0.803301
0000042_10.tif	predator	2HRS	15.255	14.714	4.63021	3.33018	-1.30003	0	0.29777	0.991626	-0.38711
0000042_10.tif	predator	2HRS	14.12	16.339	4.63021	4.34015	-0.290053	0	0.29777	1.29237	-0.086369
0000042_10.tif	predator	2HRS	17.516	17.203	4.63021	6.68873	2.05853	1	0.29777	1.9917	0.612967
0000042_10.tif	predator	2HRS	19.026	16.734	4.63021	7.45031	2.8201	1	0.29777	2.21848	0.839742
0000042_10.tif	predator	2HRS	19.016	16.484	4.63021	7.28941	2.65921	1	0.29777	2.17057	0.791832
0000042_10.tif	predator	2HRS	20.359	8.714	4.63021	7.92526	3.29506	1	0.29777	2.35991	0.981169
0000042_10.tif	predator	2HRS	22.526	7.464	4.63021	10.4206	5.79036	1	0.29777	3.10293	1.72419
0000042_10.tif	predator	2HRS	19.349	3.932	4.63021	10.2272	5.59702	1	0.29777	3.04536	1.66663
00000047_6.tif	control	2HRS	12.24	6.583	4.36987	5.92703	1.55716	1	0.29777	1.76489	0.463676
00000047_6.tif	control	2HRS	13.439	9.036	4.36987	3.20145	-1.16841	0	0.29777	0.953297	-0.347918
00000047_6.tif	control	2HRS	13.127	9.856	4.36987	2.61953	-1.75034	0	0.29777	0.780017	-0.521198
00000047_6.tif	control	2HRS	13.071	9.731	4.36987	2.75439	-1.61548	0	0.29777	0.820175	-0.48104
00000047_6.tif	control	2HRS	13.016	9.46	4.36987	3.01177	-1.35809	0	0.29777	0.896816	-0.404399
00000047_6.tif	control	2HRS	10.696	13.321	4.36987	4.12488	-0.244991	0	0.29777	1.22826	-0.0729509
00000047_6.tif	control	2HRS	11.481	13.668	4.36987	3.53744	-0.832425	0	0.29777	1.05334	-0.247871
00000047_6.tif	control	2HRS	12.252	13.495	4.36987	2.7826	-1.58726	0	0.29777	0.828576	-0.472639
00000047_6.tif	control	2HRS	12.148	13.62	4.36987	2.93757	-1.43229	0	0.29777	0.874721	-0.426494
00000047_6.tif	control	2HRS	12.495	13.738	4.36987	2.72659	-1.64328	0	0.29777	0.811896	-0.489319
00000047_6.tif	control	2HRS	12.946	13.925	4.36987	2.53177	-1.8381	0	0.29777	0.753885	-0.54733
00000047_6.tif	control	2HRS	13.196	13.814	4.36987	2.28678	-2.08308	0	0.29777	0.680935	-0.62028
00000047_6.tif	control	2HRS	12.377	12.266	4.36987	2.24596	-2.12391	0	0.29777	0.668779	-0.632436
00000047_6.tif	control	2HRS	12.321	12.099	4.36987	2.2895	-2.08036	0	0.29777	0.681746	-0.619469
00000047_6.tif	control	2HRS	13.648	14.648	4.36987	2.80195	-1.56791	0	0.29777	0.834338	-0.466877
00000047_6.tif	control	2HRS	12.273	15.439	4.36987	4.14413	-0.225735	0	0.29777	1.234	-0.067217
00000047_6.tif	control	2HRS	11.585	14.884	4.36987	4.16773	-0.202133	0	0.29777	1.24103	-0.0601891
00000047_6.tif	control	2HRS	11.599	14.828	4.36987	4.11916	-0.25071	0	0.29777	1.22656	-0.074654
00000047_6.tif	control	2HRS	11.571	14.3	4.36987	3.8008	-0.569063	0	0.29777	1.13176	-0.16945
00000047_6.tif	control	2HRS	11.863	14.439	4.36987	3.66216	-0.707702	0	0.29777	1.09048	-0.210732
00000047_6.tif	control	2HRS	12.516	14.134	4.36987	2.97768	-1.39219	0	0.29777	0.886664	-0.414551
00000047_6.tif	control	2HRS	15.019	15.484	4.36987	3.49215	-0.877714	0	0.29777	1.03986	-0.261357
00000047_6.tif	control	2HRS	15.686	15.207	4.36987	3.36785	-1.00202	0	0.29777	1.00284	-0.29837
00000047_6.tif	control	2HRS	15.227	14.651	4.36987	2.7065	-1.66336	0	0.29777	0.805915	-0.4953
00000047_6.tif	control	2HRS	14.422	15.144	4.36987	3.13358	-1.23628	0	0.29777	0.933088	-0.368127
00000047_6.tif	control	2HRS	14.207	14.95	4.36987	2.96141	-1.40845	0	0.29777	0.88182	-0.419395
00000047_6.tif	control	2HRS	14.339	14.179	4.36987	2.17979	-2.19008	0	0.29777	0.649075	-0.65214
00000047_6.tif	control	2HRS	14.2	14.144	4.36987	2.16695	-2.20292	0	0.29777	0.645252	-0.655963
00000047_6.tif	control	2HRS	14.207	14.047	4.36987	2.0704	-2.29946	0	0.29777	0.616504	-0.684711
00000047_6.tif	control	2HRS	17.116	12.734	4.36987	2.60779	-1.76208	0	0.29777	0.776522	-0.524693
00000047_6.tif	control	2HRS	16.234	12.241	4.36987	1.6405	-2.72936	0	0.29777	0.488493	-0.812722
00000047_6.tif	control	2HRS	16.186	11.387	4.36987	1.69781	-2.67205	0	0.29777	0.505558	-0.795657
00000047_6.tif	control	2HRS	18.109	11.637	4.36987	3.52046	-0.849406	0	0.29777	1.04829	-0.252928
00000047_6.tif	control	2HRS	18.179	11.498	4.36987	3.60738	-0.762481	0	0.29777	1.07417	-0.227044
00000047_6.tif	control	2HRS	16.436	10.717	4.36987	2.24172	-2.12814	0	0.29777	0.667518	-0.633697
00000047_6.tif	control	2HRS	16.811	10.314	4.36987	2.78309	-1.58677	0	0.29777	0.828722	-0.472493
00000047_6.tif	control	2HRS	14.769	10.842	4.36987	1.18485	-3.18501	0	0.29777	0.352814	-0.948401
00000047_6.tif	control	2HRS	14.262	10.606	4.36987	1.45207	-2.9178	0	0.29777	0.432383	-0.868832
00000047_6.tif	control	2HRS	14.2	10.557	4.36987	1.51524	-2.85462	0	0.29777	0.451194	-0.850021
00000047_6.tif	control	2HRS	14.769	10.127	4.36987	1.89576	-2.4741	0	0.29777	0.564502	-0.736713
00000047_6.tif	control	2HRS	14.88	10.127	4.36987	1.90834	-2.46153	0	0.29777	0.568246	-0.732969
00000047_6.tif	control	2HRS	15.852	10.356	4.36987	2.0738	-2.29607	0	0.29777	0.617516	-0.683699
00000047_6.tif	control	2HRS	15.651	9.981	4.36987	2.28626	-2.08361	0	0.29777	0.68078	-0.620435
00000047_6.tif	control	2HRS	16.054	9.481	4.36987	2.91792	-1.45195	0	0.29777	0.868869	-0.432346
00000047_6.tif	control	2HRS	14.852	8.398	4.36987	3.62615	-0.743715	0	0.29777	1.07976	-0.221456
00000047_6.tif	control	2HRS	14.762	8.363	4.36987	3.6562	-0.713663	0	0.29777	1.08871	-0.212508
00000047_6.tif	control	2HRS	14.373	8.405	4.36987	3.6187	-0.751162	0	0.29777	1.07754	-0.223674
00000047_6.tif	control	2HRS	14.234	8.391	4.36987	3.64434	-0.725521	0	0.29777	1.08518	-0.216038
00000047_6.tif	control	2HRS	14.245	4.974	4.36987	7.0514	2.68154	1	0.29777	2.0997	0.798481
0000002_22.tif	control	2HRS	11.823	7.792	4.74999	4.03122	-0.718775	0	0.29777	1.20038	-0.21403
0000002_22.tif	control	2HRS	12.135	8.302	4.74999	3.43583	-1.31416	0	0.29777	1.02309	-0.391319
0000002_22.tif	control	2HRS	12.63	8.312	4.74999	3.15325	-1.59674	0	0.29777	0.938943	-0.475462
0000002_22.tif	control	2HRS	13.083	7.854	4.74999	3.38068	-1.36932	0	0.29777	1.00666	-0.407742
0000002_22.tif	control	2HRS	13.135	7.854	4.74999	3.36373	-1.38626	0	0.29777	1.00162	-0.412788
0000002_22.tif	control	2HRS	14.156	9.786	4.74999	1.25708	-3.49292	0	0.29777	0.37432	-1.04009
0000002_22.tif	control	2HRS	14.198	9.995	4.74999	1.04705	-3.70295	0	0.29777	0.311779	-1.10263
0000002_22.tif	control	2HRS	13.255	10.875	4.74999	0.967522	-3.78247	0	0.29777	0.288099	-1.12631
0000002_22.tif	control	2HRS	13.286	11.036	4.74999	0.92202	-3.82797	0	0.29777	0.27455	-1.13986
0000002_22.tif	control	2HRS	13.156	11.812	4.74999	1.30369	-3.44631	0	0.29777	0.388199	-1.02621
0000002_22.tif	control	2HRS	14.245	12.302	4.74999	1.26054	-3.48945	0	0.29777	0.375352	-1.03905
0000002_22.tif	control	2HRS	14.13	12.302	4.74999	1.26241	-3.48758	0	0.29777	0.375908	-1.0385
0000002_22.tif	control	2HRS	14.104	12.401	4.74999	1.36297	-3.38702	0	0.29777	0.405853	-1.00855
0000002_22.tif	control	2HRS	12.385	11.615	4.74999	1.91093	-2.83906	0	0.29777	0.569018	-0.845388
0000002_22.tif	control	2HRS	11.25	11.714	4.74999	3.03337	-1.71662	0	0.29777	0.903247	-0.511158
0000002_22.tif	control	2HRS	11.943	13.615	4.74999	3.42791	-1.32209	0	0.29777	1.02073	-0.393677
0000002_22.tif	control	2HRS	12.323	13.901	4.74999	3.42449	-1.32551	0	0.29777	1.01971	-0.394696
0000002_22.tif	control	2HRS	13.292	12.849	4.74999	2.02591	-2.72409	0	0.29777	0.603255	-0.811151
0000002_22.tif	control	2HRS	14.464	12.505	4.74999	1.48523	-3.26476	0	0.29777	0.442257	-0.972149
0000002_22.tif	control	2HRS	13.714	14.698	4.74999	3.68922	-1.06077	0	0.29777	1.09854	-0.315866
0000002_22.tif	control	2HRS	13.12	14.885	4.74999	3.99404	-0.755949	0	0.29777	1.18931	-0.225099
0000002_22.tif	control	2HRS	13.823	15.927	4.74999	4.90015	0.150154	1	0.29777	1.45912	0.0447114
0000002_22.tif	control	2HRS	13.979	15.99	4.74999	4.9533	0.203303	1	0.29777	1.47494	0.0605374
0000002_22.tif	control	2HRS	14.26	15.047	4.74999	4.00534	-0.744656	0	0.29777	1.19267	-0.221736
0000002_22.tif	control	2HRS	14.76	14.661	4.74999	3.66086	-1.08914	0	0.29777	1.09009	-0.324313
0000002_22.tif	control	2HRS	14.828	14.438	4.74999	3.45213	-1.29786	0	0.29777	1.02794	-0.386464
0000002_22.tif	control	2HRS	15.036	14.562	4.74999	3.61607	-1.13392	0	0.29777	1.07676	-0.337648
0000002_22.tif	control	2HRS	15.714	15.646	4.74999	4.84405	0.0940594	1	0.29777	1.44241	0.0280081
0000002_22.tif	control	2HRS	15.901	15.391	4.74999	4.66691	-0.0830837	0	0.29777	1.38967	-0.0247398
0000002_22.tif	control	2HRS	15.781	15.214	4.74999	4.45869	-0.291304	0	0.29777	1.32766	-0.0867417
0000002_22.tif	control	2HRS	16.411	13.682	4.74999	3.43843	-1.31156	0	0.29777	1.02386	-0.390544
0000002_22.tif	control	2HRS	15.307	12.906	4.74999	2.16386	-2.58613	0	0.29777	0.644333	-0.770073
0000002_22.tif	control	2HRS	15.375	12.943	4.74999	2.23063	-2.51937	0	0.29777	0.664213	-0.750192
0000002_22.tif	control	2HRS	14.896	12.698	4.74999	1.79323	-2.95676	0	0.29777	0.533971	-0.880435
0000002_22.tif	control	2HRS	14.943	12.464	4.74999	1.60072	-3.14927	0	0.29777	0.476647	-0.937759
0000002_22.tif	control	2HRS	14.938	12.042	4.74999	1.2381	-3.51189	0	0.29777	0.36867	-1.04574
0000002_22.tif	control	2HRS	14.99	11.958	4.74999	1.2044	-3.54559	0	0.29777	0.358634	-1.05577
0000002_22.tif	control	2HRS	15.443	12.557	4.74999	1.9546	-2.7954	0	0.29777	0.58202	-0.832385
0000002_22.tif	control	2HRS	15.552	11.885	4.74999	1.5865	-3.16349	0	0.29777	0.472412	-0.941993
0000002_22.tif	control	2HRS	15.797	11.672	4.74999	1.70933	-3.04066	0	0.29777	0.508988	-0.905417
0000002_22.tif	control	2HRS	15.703	10.719	4.74999	1.52949	-3.2205	0	0.29777	0.455438	-0.958968
0000002_22.tif	control	2HRS	16.203	9.984	4.74999	2.25818	-2.49181	0	0.29777	0.672419	-0.741987
0000002_22.tif	control	2HRS	16.078	9.615	4.74999	2.35228	-2.39771	0	0.29777	0.700439	-0.713967
0000002_22.tif	control	2HRS	15.854	9.5	4.74999	2.25546	-2.49454	0	0.29777	0.671607	-0.742799
0000002_22.tif	control	2HRS	15.771	9.38	4.74999	2.28149	-2.4685	0	0.29777	0.67936	-0.735045
0000002_22.tif	control	2HRS	15.5	9.354	4.74999	2.1257	-2.62429	0	0.29777	0.63297	-0.781435
0000002_22.tif	control	2HRS	15.417	9.359	4.74999	2.07224	-2.67776	0	0.29777	0.61705	-0.797355
0000002_22.tif	control	2HRS	14.943	9.557	4.74999	1.65694	-3.09305	0	0.29777	0.493387	-0.921019
0000002_22.tif	control	2HRS	14.948	9.479	4.74999	1.72933	-3.02067	0	0.29777	0.514941	-0.899464
0000002_22.tif	control	2HRS	14.948	9.188	4.74999	1.99623	-2.75377	0	0.29777	0.594416	-0.81999
0000002_22.tif	control	2HRS	17.312	9.021	4.74999	3.70395	-1.04604	0	0.29777	1.10293	-0.31148
0000002_22.tif	control	2HRS	17.214	9	4.74999	3.63398	-1.11602	0	0.29777	1.08209	-0.332316
0000002_22.tif	control	2HRS	16.474	8.729	4.74999	3.23801	-1.51198	0	0.29777	0.964183	-0.450223
0000002_22.tif	control	2HRS	17.953	8.786	4.74999	4.37202	-0.377974	0	0.29777	1.30186	-0.112549
0000002_23.tif	control	2HRS	14.219	6.677	5.24475	4.7333	-0.511444	0	0.29777	1.40944	-0.152293
0000002_23.tif	control	2HRS	14.818	6.604	5.24475	4.67061	-0.574138	0	0.29777	1.39077	-0.170961
0000002_23.tif	control	2HRS	14.562	7.849	5.24475	3.51216	-1.73259	0	0.29777	1.04582	-0.515913
0000002_23.tif	control	2HRS	15.599	7.667	5.24475	3.54714	-1.69761	0	0.29777	1.05623	-0.505498
0000002_23.tif	control	2HRS	15.458	7.677	5.24475	3.53871	-1.70604	0	0.29777	1.05372	-0.508007
0000002_23.tif	control	2HRS	15.349	7.151	5.24475	4.0689	-1.17585	0	0.29777	1.2116	-0.350133
0000002_23.tif	control	2HRS	15.443	7.068	5.24475	4.14788	-1.09686	0	0.29777	1.23512	-0.326613
0000002_23.tif	control	2HRS	15.583	6.87	5.24475	4.34403	-0.900722	0	0.29777	1.29352	-0.268208
0000002_23.tif	control	2HRS	12.474	9.245	5.24475	3.6674	-1.57735	0	0.29777	1.09204	-0.469688
0000002_23.tif	control	2HRS	13.135	11.083	5.24475	2.43652	-2.80822	0	0.29777	0.725524	-0.836205
0000002_23.tif	control	2HRS	11.906	12.542	5.24475	3.89536	-1.34939	0	0.29777	1.15992	-0.401807
0000002_23.tif	control	2HRS	12.932	13.198	5.24475	3.2992	-1.94554	0	0.29777	0.982404	-0.579325
0000002_23.tif	control	2HRS	12.974	13.682	5.24475	3.58048	-1.66427	0	0.29777	1.06616	-0.495568
0000002_23.tif	control	2HRS	13.036	13.615	5.24475	3.48939	-1.75536	0	0.29777	1.03903	-0.522694
0000002_23.tif	control	2HRS	13.979	13.729	5.24475	2.97492	-2.26983	0	0.29777	0.885842	-0.675887
0000002_23.tif	control	2HRS	14.01	13.531	5.24475	2.79211	-2.45264	0	0.29777	0.831405	-0.730323
0000002_23.tif	control	2HRS	13.839	13	5.24475	2.48581	-2.75894	0	0.29777	0.740199	-0.82153
0000002_23.tif	control	2HRS	13.807	12.896	5.24475	2.43521	-2.80954	0	0.29777	0.725132	-0.836596
0000002_23.tif	control	2HRS	17.26	13.901	5.24475	3.17535	-2.0694	0	0.29777	0.945523	-0.616205
0000002_23.tif	control	2HRS	17.464	13.995	5.24475	3.36582	-1.87892	0	0.29777	1.00224	-0.559487
0000002_23.tif	control	2HRS	17.536	13.948	5.24475	3.36865	-1.8761	0	0.29777	1.00308	-0.558647
0000002_23.tif	control	2HRS	17.807	13.917	5.24475	3.50989	-1.73486	0	0.29777	1.04514	-0.516589
0000002_23.tif	control	2HRS	17.953	13.562	5.24475	3.34684	-1.89791	0	0.29777	0.996588	-0.565141
0000002_23.tif	control	2HRS	17.969	13.516	5.24475	3.32626	-1.91849	0	0.29777	0.99046	-0.571268
0000002_23.tif	control	2HRS	18.073	13.578	5.24475	3.44435	-1.8004	0	0.29777	1.02562	-0.536106
0000002_23.tif	control	2HRS	18.156	13.557	5.24475	3.49104	-1.7537	0	0.29777	1.03953	-0.5222
0000002_23.tif	control	2HRS	17.969	13.359	5.24475	3.2196	-2.02515	0	0.29777	0.9587	-0.603028
0000002_23.tif	control	2HRS	16.667	13.542	5.24475	2.57437	-2.67038	0	0.29777	0.76657	-0.795158
0000002_23.tif	control	2HRS	16.693	13.401	5.24475	2.45939	-2.78536	0	0.29777	0.732332	-0.829396
0000002_23.tif	control	2HRS	17.672	11.578	5.24475	2.13525	-3.10949	0	0.29777	0.635815	-0.925914
0000002_23.tif	control	2HRS	17.661	11.5	5.24475	2.11245	-3.1323	0	0.29777	0.629024	-0.932704
0000002_23.tif	control	2HRS	15.495	11.125	5.24475	0.115109	-5.12964	0	0.29777	0.0342759	-1.52745
0000002_23.tif	control	2HRS	15.599	10.385	5.24475	0.829579	-4.41517	0	0.29777	0.247024	-1.3147
0000002_23.tif	control	2HRS	15.74	10.182	5.24475	1.04624	-4.19851	0	0.29777	0.311537	-1.25019
0000002_23.tif	control	2HRS	16.99	10.219	5.24475	1.73554	-3.50921	0	0.29777	0.516793	-1.04494
0000002_23.tif	control	2HRS	17.938	9.151	5.24475	3.14211	-2.10264	0	0.29777	0.935627	-0.626102
0000002_23.tif	control	2HRS	18.104	9.266	5.24475	3.19781	-2.04694	0	0.29777	0.952212	-0.609516
0000002_23.tif	control	2HRS	18.328	9.146	5.24475	3.4488	-1.79595	0	0.29777	1.02695	-0.534779
0000002_23.tif	control	2HRS	18.49	8.88	5.24475	3.73974	-1.50501	0	0.29777	1.11358	-0.448147
0000002_23.tif	control	2HRS	18.302	7.859	5.24475	4.32791	-0.916841	0	0.29777	1.28872	-0.273008
0000002_23.tif	control	2HRS	20.708	11.714	5.24475	5.16426	-0.0804866	0	0.29777	1.53776	-0.0239665
0000002_23.tif	control	2HRS	20.562	12.807	5.24475	5.24192	-0.00283221	0	0.29777	1.56089	-0.000843347
0000002_23.tif	control	2HRS	19.74	13.167	5.24475	4.60649	-0.638254	0	0.29777	1.37168	-0.190053
0000002_23.tif	control	2HRS	19.557	13.589	5.24475	4.64249	-0.602255	0	0.29777	1.3824	-0.179333
0000003_18.tif	control	2HRS	12.719	18.026	4.61457	6.12873	1.51416	1	0.29777	1.82495	0.45087
0000003_18.tif	control	2HRS	12.703	17.958	4.61457	6.06972	1.45514	1	0.29777	1.80738	0.433298
0000003_18.tif	control	2HRS	13.036	17.146	4.61457	5.1935	0.578929	1	0.29777	1.54647	0.172388
0000003_18.tif	control	2HRS	12.995	16.995	4.61457	5.0645	0.449922	1	0.29777	1.50806	0.133973
0000003_18.tif	control	2HRS	13.078	16.859	4.61457	4.90854	0.293969	1	0.29777	1.46162	0.0875353
0000003_18.tif	control	2HRS	12.812	16.844	4.61457	4.98929	0.374718	1	0.29777	1.48566	0.11158
0000003_18.tif	control	2HRS	13.604	16.438	4.61457	4.35138	-0.263195	0	0.29777	1.29571	-0.0783717
0000003_18.tif	control	2HRS	13.594	16.036	4.61457	3.96664	-0.647933	0	0.29777	1.18115	-0.192935
0000003_18.tif	control	2HRS	13.698	15.906	4.61457	3.81319	-0.801383	0	0.29777	1.13545	-0.238628
0000003_18.tif	control	2HRS	13.776	15.948	4.61457	3.834	-0.78057	0	0.29777	1.14165	-0.23243
0000003_18.tif	control	2HRS	13.833	15.849	4.61457	3.72425	-0.890326	0	0.29777	1.10897	-0.265112
0000003_18.tif	control	2HRS	12.755	16.146	4.61457	4.37688	-0.237692	0	0.29777	1.3033	-0.0707775
0000003_18.tif	control	2HRS	12.698	16.057	4.61457	4.32362	-0.290955	0	0.29777	1.28744	-0.0866376
0000003_18.tif	control	2HRS	12.682	15.464	4.61457	3.81705	-0.79752	0	0.29777	1.1366	-0.237478
0000003_18.tif	control	2HRS	12.917	15.38	4.61457	3.62443	-0.990146	0	0.29777	1.07925	-0.294836
0000003_18.tif	control	2HRS	12.844	15.198	4.61457	3.50563	-1.10894	0	0.29777	1.04387	-0.33021
0000003_18.tif	control	2HRS	13.245	15.708	4.61457	3.7741	-0.840477	0	0.29777	1.12381	-0.250269
0000003_18.tif	control	2HRS	13.312	15.651	4.61457	3.69579	-0.918779	0	0.29777	1.1005	-0.273585
0000003_18.tif	control	2HRS	14.188	15.167	4.61457	2.98366	-1.63091	0	0.29777	0.888445	-0.485636
0000003_18.tif	control	2HRS	14.182	14.495	4.61457	2.32625	-2.28833	0	0.29777	0.692687	-0.681395
0000003_18.tif	control	2HRS	11.797	14.75	4.61457	3.85089	-0.763683	0	0.29777	1.14668	-0.227402
0000003_18.tif	control	2HRS	12.109	13.078	4.61457	2.73415	-1.88042	0	0.29777	0.814149	-0.559933
0000003_18.tif	control	2HRS	13.391	13.146	4.61457	1.6048	-3.00978	0	0.29777	0.477861	-0.896221
0000003_18.tif	control	2HRS	13.458	13.125	4.61457	1.53796	-3.07662	0	0.29777	0.457958	-0.916124
0000003_18.tif	control	2HRS	11.667	12.083	4.61457	3.0445	-1.57007	0	0.29777	0.906562	-0.46752
0000003_18.tif	control	2HRS	11.51	11.974	4.61457	3.20815	-1.40642	0	0.29777	0.955291	-0.418791
0000003_18.tif	control	2HRS	12.01	11.104	4.61457	2.92315	-1.69142	0	0.29777	0.870428	-0.503654
0000003_18.tif	control	2HRS	13.979	11.766	4.61457	0.863603	-3.75097	0	0.29777	0.257155	-1.11693
0000003_18.tif	control	2HRS	14.094	11.74	4.61457	0.784931	-3.82964	0	0.29777	0.233729	-1.14035
0000003_18.tif	control	2HRS	12.885	10.599	4.61457	2.44545	-2.16912	0	0.29777	0.728182	-0.6459
0000003_18.tif	control	2HRS	13.651	9.682	4.61457	2.75762	-1.85696	0	0.29777	0.821136	-0.552946
0000003_18.tif	control	2HRS	13.641	9.542	4.61457	2.8911	-1.72347	0	0.29777	0.860883	-0.513199
0000003_18.tif	control	2HRS	13.276	9.26	4.61457	3.2963	-1.31828	0	0.29777	0.981539	-0.392543
0000003_18.tif	control	2HRS	14.852	11.766	4.61457	0.484876	-4.1297	0	0.29777	0.144382	-1.2297
0000003_18.tif	control	2HRS	14.293	13.797	4.61457	1.62199	-2.99258	0	0.29777	0.48298	-0.891102
0000003_18.tif	control	2HRS	14.359	14.571	4.61457	2.36786	-2.24671	0	0.29777	0.705078	-0.669004
0000003_18.tif	control	2HRS	14.307	14.762	4.61457	2.56454	-2.05003	0	0.29777	0.763645	-0.610437
0000003_18.tif	control	2HRS	15.943	13.609	4.61457	1.85192	-2.76265	0	0.29777	0.551448	-0.822634
0000003_18.tif	control	2HRS	15.988	14.113	4.61457	2.27769	-2.33689	0	0.29777	0.678227	-0.695855
0000003_18.tif	control	2HRS	15.877	14.175	4.61457	2.27013	-2.34445	0	0.29777	0.675976	-0.698106
0000003_18.tif	control	2HRS	15.752	14.266	4.61457	2.28895	-2.32562	0	0.29777	0.681581	-0.6925
0000003_18.tif	control	2HRS	15.776	14.602	4.61457	2.60226	-2.01231	0	0.29777	0.774875	-0.599207
0000003_18.tif	control	2HRS	15.911	14.63	4.61457	2.68552	-1.92906	0	0.29777	0.799667	-0.574415
0000003_18.tif	control	2HRS	16.148	14.745	4.61457	2.89894	-1.71563	0	0.29777	0.863218	-0.510864
0000003_18.tif	control	2HRS	16.255	14.172	4.61457	2.48364	-2.13094	0	0.29777	0.739553	-0.634529
0000003_18.tif	control	2HRS	16.224	14.05	4.61457	2.36945	-2.24512	0	0.29777	0.705551	-0.66853
0000003_18.tif	control	2HRS	16.835	14.089	4.61457	2.82555	-1.78902	0	0.29777	0.841364	-0.532718
0000003_18.tif	control	2HRS	16.929	14.023	4.61457	2.85504	-1.75953	0	0.29777	0.850146	-0.523935
0000003_18.tif	control	2HRS	17.057	14.505	4.61457	3.27078	-1.3438	0	0.29777	0.973939	-0.400143
0000003_18.tif	control	2HRS	15.845	14.894	4.61457	2.89741	-1.71716	0	0.29777	0.862762	-0.511319
0000003_18.tif	control	2HRS	14.339	15.894	4.61457	3.68353	-0.931045	0	0.29777	1.09684	-0.277237
0000003_18.tif	control	2HRS	14.773	16.089	4.61457	3.86055	-0.754027	0	0.29777	1.14956	-0.224527
0000003_18.tif	control	2HRS	18.123	13.085	4.61457	3.52065	-1.09393	0	0.29777	1.04834	-0.325738
0000003_18.tif	control	2HRS	17.429	12.714	4.61457	2.76389	-1.85069	0	0.29777	0.823002	-0.551079
0000003_18.tif	control	2HRS	17.373	11.911	4.61457	2.68391	-1.93067	0	0.29777	0.799187	-0.574895
0000003_18.tif	control	2HRS	18.991	11.036	4.61457	4.44605	-0.168527	0	0.29777	1.3239	-0.0501822
0000003_18.tif	control	2HRS	17.939	9.373	4.61457	4.31232	-0.302255	0	0.29777	1.28408	-0.0900025
0000003_18.tif	control	2HRS	18.061	9.37	4.61457	4.40641	-0.20816	0	0.29777	1.3121	-0.0619837
0000003_18.tif	control	2HRS	18.526	9.547	4.61457	4.66586	0.0512857	1	0.29777	1.38935	0.0152713
0000003_27.tif	predator	2HRS	5.436	11.47	5.18238	8.15798	2.9756	1	0.29777	2.4292	0.886044
0000003_27.tif	predator	2HRS	6.123	11.234	5.18238	7.48416	2.30177	1	0.29777	2.22856	0.6854
0000003_27.tif	predator	2HRS	7.719	14.052	5.18238	6.30342	1.12104	1	0.29777	1.87697	0.333812
0000003_27.tif	predator	2HRS	7.901	13.964	5.18238	6.10189	0.919505	1	0.29777	1.81696	0.273801
0000003_27.tif	predator	2HRS	7.891	14.078	5.18238	6.15334	0.970954	1	0.29777	1.83228	0.289121
0000003_27.tif	predator	2HRS	8.062	14.005	5.18238	5.96743	0.785049	1	0.29777	1.77692	0.233764
0000003_27.tif	predator	2HRS	8.87	13.885	5.18238	5.17744	-0.00494384	0	0.29777	1.54169	-0.00147213
0000003_27.tif	predator	2HRS	12.75	14.682	5.18238	3.04487	-2.13751	0	0.29777	0.906672	-0.636486
0000003_27.tif	predator	2HRS	10.698	11.365	5.18238	2.91719	-2.26519	0	0.29777	0.868651	-0.674507
0000003_27.tif	predator	2HRS	12.688	10.193	5.18238	1.80323	-3.37915	0	0.29777	0.536948	-1.00621
0000003_27.tif	predator	2HRS	10.182	9.104	5.18238	4.31688	-0.865502	0	0.29777	1.28544	-0.25772
0000003_27.tif	predator	2HRS	10.24	9.047	5.18238	4.30686	-0.875519	0	0.29777	1.28245	-0.260703
0000003_27.tif	predator	2HRS	12.125	8.766	5.18238	3.32828	-1.85411	0	0.29777	0.991061	-0.552097
0000003_27.tif	predator	2HRS	14.578	7.219	5.18238	4.64257	-0.539816	0	0.29777	1.38242	-0.160741
0000003_27.tif	predator	2HRS	15.609	7.656	5.18238	4.5697	-0.612677	0	0.29777	1.36072	-0.182437
0000003_27.tif	predator	2HRS	15.078	13.385	5.18238	2.20772	-2.97466	0	0.29777	0.657392	-0.885765
0000003_27.tif	predator	2HRS	14.974	15.682	5.18238	4.16408	-1.0183	0	0.29777	1.23994	-0.30322
0000003_27.tif	predator	2HRS	15.682	15.859	5.18238	4.60689	-0.575488	0	0.29777	1.37179	-0.171363
0000003_27.tif	predator	2HRS	15.427	18.151	5.18238	6.65485	1.47247	1	0.29777	1.98162	0.438458
0000003_27.tif	predator	2HRS	14.359	18.276	5.18238	6.5663	1.38392	1	0.29777	1.95525	0.41209
0000003_27.tif	predator	2HRS	13.318	17.812	5.18238	6.06306	0.880678	1	0.29777	1.8054	0.262239
0000003_27.tif	predator	2HRS	13.37	17.604	5.18238	5.8531	0.670717	1	0.29777	1.74288	0.199719
0000003_27.tif	predator	2HRS	17.474	19.245	5.18238	8.43761	3.25523	1	0.29777	2.51247	0.96931
0000003_27.tif	predator	2HRS	17.63	19.292	5.18238	8.55196	3.36958	1	0.29777	2.54652	1.00336
0000003_27.tif	predator	2HRS	17.74	18.943	5.18238	8.30049	3.11811	1	0.29777	2.47164	0.928479
0000003_27.tif	predator	2HRS	16.859	17.974	5.18238	7.0263	1.84392	1	0.29777	2.09222	0.549063
0000003_27.tif	predator	2HRS	16.25	17.932	5.18238	6.72579	1.54341	1	0.29777	2.00274	0.459581
0000003_27.tif	predator	2HRS	16.25	17.328	5.18238	6.1757	0.993317	1	0.29777	1.83894	0.29578
0000003_27.tif	predator	2HRS	16.208	16.729	5.18238	5.62137	0.438992	1	0.29777	1.67388	0.130719
0000003_27.tif	predator	2HRS	16.234	16.568	5.18238	5.4919	0.309521	1	0.29777	1.63532	0.0921661
0000003_27.tif	predator	2HRS	16.25	16.359	5.18238	5.31768	0.1353	1	0.29777	1.58345	0.0402883
0000003_27.tif	predator	2HRS	18.125	10.333	5.18238	4.75367	-0.428711	0	0.29777	1.4155	-0.127657
0000003_27.tif	predator	2HRS	18.312	8.266	5.18238	5.87195	0.689573	1	0.29777	1.74849	0.205334
0000006_31.tif	predator	2HRS	13.943	22.271	4.68746	9.58515	4.89769	1	0.29777	2.85417	1.45838
0000006_31.tif	predator	2HRS	13.396	21.318	4.68746	8.66253	3.97507	1	0.29777	2.57944	1.18366
0000006_31.tif	predator	2HRS	13.438	21.104	4.68746	8.44573	3.75827	1	0.29777	2.51488	1.1191
0000006_31.tif	predator	2HRS	14.443	14.219	4.68746	1.55954	-3.12792	0	0.29777	0.464385	-0.931401
0000006_31.tif	predator	2HRS	15.141	13.214	4.68746	1.12548	-3.56198	0	0.29777	0.335134	-1.06065
0000006_31.tif	predator	2HRS	13.948	12.417	4.68746	0.335626	-4.35184	0	0.29777	0.0999394	-1.29585
0000006_31.tif	predator	2HRS	14.167	11.521	4.68746	1.16719	-3.52027	0	0.29777	0.347554	-1.04823
0000006_31.tif	predator	2HRS	14.693	10.776	4.68746	1.98871	-2.69876	0	0.29777	0.592177	-0.803608
0000006_31.tif	predator	2HRS	13.276	10.359	4.68746	2.48619	-2.20127	0	0.29777	0.740313	-0.655473
0000006_31.tif	predator	2HRS	15.141	9.938	4.68746	2.92447	-1.76299	0	0.29777	0.870819	-0.524966
0000006_31.tif	predator	2HRS	13.542	8.38	4.68746	4.35014	-0.337326	0	0.29777	1.29534	-0.100446
0000006_31.tif	predator	2HRS	13.661	8.297	4.68746	4.4177	-0.269758	0	0.29777	1.31546	-0.0803258
0000006_31.tif	predator	2HRS	12.411	8.427	4.68746	4.60069	-0.0867717	0	0.29777	1.36995	-0.025838
0000006_31.tif	predator	2HRS	18.092	5.922	4.68746	7.8326	3.14514	1	0.29777	2.33231	0.936529
0000006_31.tif	predator	2HRS	18.418	5.72	4.68746	8.17331	3.48585	1	0.29777	2.43377	1.03798
0000006_31.tif	predator	2HRS	17.655	5.061	4.68746	8.39549	3.70803	1	0.29777	2.49992	1.10414
0000006_31.tif	predator	2HRS	17.175	5.172	4.68746	8.1034	3.41594	1	0.29777	2.41295	1.01716
0000006_31.tif	predator	2HRS	16.175	5.116	4.68746	7.83913	3.15167	1	0.29777	2.33426	0.938474
0000006_31.tif	predator	2HRS	16.974	4.339	4.68746	8.81495	4.12749	1	0.29777	2.62483	1.22904
0000007_26.tif	predator	2HRS	11.387	9.755	5.04178	4.2431	-0.798682	0	0.29777	1.26347	-0.237823
0000007_26.tif	predator	2HRS	11.28	10.925	5.04178	3.73028	-1.3115	0	0.29777	1.11077	-0.390525
0000007_26.tif	predator	2HRS	12.616	10.536	5.04178	2.7993	-2.24249	0	0.29777	0.833547	-0.667745
0000007_26.tif	predator	2HRS	12.925	9.887	5.04178	3.07801	-1.96377	0	0.29777	0.91654	-0.584752
0000007_26.tif	predator	2HRS	13.307	8.839	5.04178	3.82296	-1.21882	0	0.29777	1.13836	-0.362928
0000007_26.tif	predator	2HRS	13.047	11.609	5.04178	1.83801	-3.20377	0	0.29777	0.547305	-0.953987
0000007_26.tif	predator	2HRS	12.63	14.384	5.04178	2.8758	-2.16598	0	0.29777	0.856327	-0.644965
0000007_26.tif	predator	2HRS	12.623	14.45	5.04178	2.9268	-2.11499	0	0.29777	0.871512	-0.62978
0000007_26.tif	predator	2HRS	12.988	15.946	5.04178	3.94473	-1.09705	0	0.29777	1.17462	-0.32667
0000007_26.tif	predator	2HRS	14.979	12.307	5.04178	0.28524	-4.75654	0	0.29777	0.084936	-1.41636
0000007_26.tif	predator	2HRS	13.922	11.078	5.04178	1.53457	-3.50721	0	0.29777	0.45695	-1.04434
0000007_26.tif	predator	2HRS	13.729	10.641	5.04178	2.00959	-3.03219	0	0.29777	0.598397	-0.902896
0000007_26.tif	predator	2HRS	13.812	10.224	5.04178	2.34955	-2.69223	0	0.29777	0.699626	-0.801666
0000007_26.tif	predator	2HRS	14.635	10.062	5.04178	2.33514	-2.70664	0	0.29777	0.695335	-0.805957
0000007_26.tif	predator	2HRS	15.271	10.354	5.04178	2.11819	-2.92359	0	0.29777	0.630734	-0.870558
0000007_26.tif	predator	2HRS	16.724	12.182	5.04178	2.02733	-3.01446	0	0.29777	0.603677	-0.897615
0000007_26.tif	predator	2HRS	17.401	12.786	5.04178	2.72109	-2.32069	0	0.29777	0.81026	-0.691032
0000007_26.tif	predator	2HRS	17.417	13.188	5.04178	2.8224	-2.21938	0	0.29777	0.840426	-0.660866
0000007_26.tif	predator	2HRS	14.458	9.245	5.04178	3.1609	-1.88088	0	0.29777	0.941222	-0.56007
0000007_26.tif	predator	2HRS	14.849	8.203	5.04178	4.19537	-0.846414	0	0.29777	1.24926	-0.252037
0000007_26.tif	predator	2HRS	14.917	8.094	5.04178	4.30707	-0.734711	0	0.29777	1.28252	-0.218775
0000007_26.tif	predator	2HRS	18.271	11.479	5.04178	3.67911	-1.36267	0	0.29777	1.09553	-0.405763
0000007_26.tif	predator	2HRS	18.505	11.75	5.04178	3.85156	-1.19022	0	0.29777	1.14688	-0.354413
0000007_26.tif	predator	2HRS	18.766	14.427	5.04178	4.53788	-0.503908	0	0.29777	1.35124	-0.150049
0000007_26.tif	predator	2HRS	19.146	14.141	5.04178	4.76874	-0.273046	0	0.29777	1.41999	-0.0813048
0000007_32.tif	predator	2HRS	9.01	15.115	5.29702	5.97034	0.673323	1	0.29777	1.77779	0.200495
0000007_32.tif	predator	2HRS	4.161	7.918	5.29702	10.6934	5.39641	1	0.29777	3.18418	1.60689
0000007_32.tif	predator	2HRS	8.786	9.3	5.29702	5.90635	0.609334	1	0.29777	1.75873	0.181441
0000007_32.tif	predator	2HRS	8.918	9.141	5.29702	5.86291	0.565893	1	0.29777	1.7458	0.168506
0000007_32.tif	predator	2HRS	9.37	10.21	5.29702	5.00744	-0.289572	0	0.29777	1.49107	-0.086226
0000007_32.tif	predator	2HRS	12.804	1.748	5.29702	10.2731	4.97604	1	0.29777	3.05901	1.48172
0000007_32.tif	predator	2HRS	10.332	8.464	5.29702	5.10501	-0.192005	0	0.29777	1.52012	-0.0571734
0000007_32.tif	predator	2HRS	12.394	12.241	5.29702	1.70032	-3.5967	0	0.29777	0.506304	-1.07099
0000007_32.tif	predator	2HRS	10.7	12.731	5.29702	3.45895	-1.83806	0	0.29777	1.02997	-0.54732
0000007_32.tif	predator	2HRS	12.804	15.391	5.29702	3.67238	-1.62463	0	0.29777	1.09353	-0.483767
0000007_32.tif	predator	2HRS	11.318	15.127	5.29702	4.20718	-1.08984	0	0.29777	1.25277	-0.324521
0000007_32.tif	predator	2HRS	13.436	15.668	5.29702	3.77823	-1.51878	0	0.29777	1.12504	-0.452248
0000007_32.tif	predator	2HRS	13.783	16.481	5.29702	4.54694	-0.750076	0	0.29777	1.35394	-0.22335
0000007_32.tif	predator	2HRS	14.568	15.273	5.29702	3.36733	-1.92969	0	0.29777	1.00269	-0.574603
0000007_32.tif	predator	2HRS	14.769	15.238	5.29702	3.36874	-1.92827	0	0.29777	1.00311	-0.574182
0000007_32.tif	predator	2HRS	16.845	14.884	5.29702	4.0449	-1.25212	0	0.29777	1.20445	-0.372843
0000007_32.tif	predator	2HRS	16.839	14.3	5.29702	3.63784	-1.65917	0	0.29777	1.08324	-0.494052
0000007_32.tif	predator	2HRS	14.943	11.679	5.29702	0.913959	-4.38306	0	0.29777	0.27215	-1.30514
0000007_32.tif	predator	2HRS	15.741	4.873	5.29702	7.26525	1.96823	1	0.29777	2.16337	0.58608
0000007_32.tif	predator	2HRS	14.727	3.589	5.29702	8.37995	3.08294	1	0.29777	2.4953	0.918006
0000008_29.tif	predator	2HRS	12.042	17.026	4.77612	6.15685	1.38073	1	0.29777	1.83333	0.41114
0000008_29.tif	predator	2HRS	12.87	17.438	4.77612	6.28822	1.5121	1	0.29777	1.87244	0.450258
0000008_29.tif	predator	2HRS	10.245	12.786	4.77612	4.4007	-0.375426	0	0.29777	1.3104	-0.111791
0000008_29.tif	predator	2HRS	10.802	12.448	4.77612	3.76599	-1.01013	0	0.29777	1.1214	-0.300788
0000008_29.tif	predator	2HRS	11.38	13.38	4.77612	3.64584	-1.13029	0	0.29777	1.08562	-0.336566
0000008_29.tif	predator	2HRS	11.37	13.984	4.77612	4.02281	-0.753316	0	0.29777	1.19787	-0.224315
0000008_29.tif	predator	2HRS	11.516	13.875	4.77612	3.84116	-0.934963	0	0.29777	1.14378	-0.278404
0000008_29.tif	predator	2HRS	10.156	11.073	4.77612	4.25333	-0.522798	0	0.29777	1.26651	-0.155674
0000008_29.tif	predator	2HRS	9.932	10.703	4.77612	4.51403	-0.262095	0	0.29777	1.34414	-0.078044
0000008_29.tif	predator	2HRS	10.302	10.245	4.77612	4.24248	-0.533644	0	0.29777	1.26328	-0.158903
0000008_29.tif	predator	2HRS	13.438	8.516	4.77612	2.98273	-1.79339	0	0.29777	0.888168	-0.534018
0000008_29.tif	predator	2HRS	13.339	8.448	4.77612	3.07989	-1.69623	0	0.29777	0.917099	-0.505087
0000008_29.tif	predator	2HRS	12.672	7	4.77612	4.6708	-0.105325	0	0.29777	1.39082	-0.0313626
0000008_29.tif	predator	2HRS	10.932	5.875	4.77612	6.47219	1.69607	1	0.29777	1.92722	0.505038
0000008_29.tif	predator	2HRS	10.005	2.641	4.77612	9.74577	4.96965	1	0.29777	2.902	1.47981
0000008_29.tif	predator	2HRS	10.062	2.5	4.77612	9.84656	5.07044	1	0.29777	2.93201	1.50983
0000008_29.tif	predator	2HRS	15.083	8.87	4.77612	2.56146	-2.21466	0	0.29777	0.762726	-0.65946
0000008_29.tif	predator	2HRS	15.349	10.719	4.77612	1.13274	-3.64338	0	0.29777	0.337297	-1.08489
0000008_29.tif	predator	2HRS	15.141	11.641	4.77612	0.799252	-3.97687	0	0.29777	0.237993	-1.18419
0000008_29.tif	predator	2HRS	14.604	12.589	4.77612	1.26638	-3.50975	0	0.29777	0.377089	-1.0451
0000008_29.tif	predator	2HRS	16.38	14.089	4.77612	3.38806	-1.38807	0	0.29777	1.00886	-0.413324
0000008_29.tif	predator	2HRS	14.771	13.75	4.77612	2.43923	-2.3369	0	0.29777	0.726328	-0.695858
0000008_29.tif	predator	2HRS	16.5	15.292	4.77612	4.47571	-0.300411	0	0.29777	1.33273	-0.0894533
0000008_29.tif	predator	2HRS	16.422	16.281	4.77612	5.33927	0.563146	1	0.29777	1.58987	0.167688
0000008_29.tif	predator	2HRS	17.594	11.25	4.77612	3.19424	-1.58188	0	0.29777	0.951149	-0.471038
0000008_29.tif	predator	2HRS	17.651	11.182	4.77612	3.25379	-1.52233	0	0.29777	0.968881	-0.453305
0000008_29.tif	predator	2HRS	20.568	7.318	4.77612	7.36209	2.58596	1	0.29777	2.19221	0.770022
0000008_29.tif	predator	2HRS	19.109	5.005	4.77612	7.89207	3.11595	1	0.29777	2.35002	0.927836
0000009_28.tif	predator	2HRS	11.724	8.104	5.14595	4.81998	-0.325972	0	0.29777	1.43525	-0.0970648
0000009_28.tif	predator	2HRS	12.792	7.484	5.14595	4.752	-0.393953	0	0.29777	1.415	-0.117307
0000009_28.tif	predator	2HRS	13.344	7.224	5.14595	4.78422	-0.361736	0	0.29777	1.4246	-0.107714
0000009_28.tif	predator	2HRS	15.219	8.703	5.14595	3.07743	-2.06853	0	0.29777	0.916366	-0.615945
0000009_28.tif	predator	2HRS	15.297	8.682	5.14595	3.10817	-2.03779	0	0.29777	0.925519	-0.606791
0000009_28.tif	predator	2HRS	14.927	9.661	5.14595	2.09992	-3.04604	0	0.29777	0.625292	-0.907019
0000009_28.tif	predator	2HRS	14.604	10.5	5.14595	1.28675	-3.85921	0	0.29777	0.383155	-1.14916
0000009_28.tif	predator	2HRS	15.578	10.349	5.14595	1.58091	-3.56504	0	0.29777	0.470749	-1.06156
0000009_28.tif	predator	2HRS	15.708	10.943	5.14595	1.17394	-3.97201	0	0.29777	0.349564	-1.18275
0000009_28.tif	predator	2HRS	15.375	11.625	5.14595	0.527565	-4.61839	0	0.29777	0.157093	-1.37522
0000009_28.tif	predator	2HRS	14.104	11.094	5.14595	1.01127	-4.13468	0	0.29777	0.301127	-1.23118
0000009_28.tif	predator	2HRS	11.021	12.583	5.14595	3.93111	-1.21484	0	0.29777	1.17057	-0.361742
0000009_28.tif	predator	2HRS	11.255	12.578	5.14595	3.70152	-1.44444	0	0.29777	1.1022	-0.43011
0000009_28.tif	predator	2HRS	11.938	13.714	5.14595	3.5193	-1.62666	0	0.29777	1.04794	-0.48437
0000009_28.tif	predator	2HRS	12.375	14.984	5.14595	4.07361	-1.07235	0	0.29777	1.213	-0.319313
0000009_28.tif	predator	2HRS	13.542	15.677	5.14595	4.13439	-1.01156	0	0.29777	1.2311	-0.301212
0000009_28.tif	predator	2HRS	12.064	19.391	5.14595	8.12882	2.98287	1	0.29777	2.42052	0.888209
0000009_28.tif	predator	2HRS	12.724	18.335	5.14595	6.9148	1.76885	1	0.29777	2.05902	0.52671
0000009_28.tif	predator	2HRS	16.245	15.547	5.14595	4.0306	-1.11535	0	0.29777	1.20019	-0.332118
0000009_28.tif	predator	2HRS	16.432	15.198	5.14595	3.77827	-1.36768	0	0.29777	1.12506	-0.407255
0000009_28.tif	predator	2HRS	17.349	15.792	5.14595	4.73574	-0.410208	0	0.29777	1.41016	-0.122148
0000009_28.tif	predator	2HRS	16.396	14.927	5.14595	3.51765	-1.62831	0	0.29777	1.04745	-0.48486
0000009_28.tif	predator	2HRS	16.396	14.76	5.14595	3.36808	-1.77787	0	0.29777	1.00291	-0.529397
0000009_28.tif	predator	2HRS	18.641	10.167	5.14595	4.09827	-1.04768	0	0.29777	1.22034	-0.311968
0000009_28.tif	predator	2HRS	17.797	9.656	5.14595	3.6088	-1.53715	0	0.29777	1.07459	-0.457718
0000009_28.tif	predator	2HRS	17.786	9.375	5.14595	3.771	-1.37495	0	0.29777	1.12289	-0.409419
0000009_28.tif	predator	2HRS	18.151	8.839	5.14595	4.39659	-0.74936	0	0.29777	1.30917	-0.223137
0000009_28.tif	predator	2HRS	17.276	8.005	5.14595	4.46239	-0.683561	0	0.29777	1.32877	-0.203544
0000009_28.tif	predator	2HRS	21.479	15.609	5.14595	7.65244	2.50648	1	0.29777	2.27867	0.746356
0000009_28.tif	predator	2HRS	21.802	16	5.14595	8.13016	2.98421	1	0.29777	2.42092	0.888608
0000009_28.tif	predator	2HRS	18.953	19.646	5.14595	8.88261	3.73666	1	0.29777	2.64497	1.11266
0000009_30.tif	predator	2HRS	9.615	17.151	4.51563	8.49236	3.97673	1	0.29777	2.52877	1.18415
0000009_30.tif	predator	2HRS	9.49	16.995	4.51563	8.48308	3.96744	1	0.29777	2.52601	1.18139
0000009_30.tif	predator	2HRS	9.401	16.562	4.51563	8.27726	3.76163	1	0.29777	2.46472	1.1201
0000009_30.tif	predator	2HRS	9.453	15.818	4.51563	7.79777	3.28214	1	0.29777	2.32194	0.977323
0000009_30.tif	predator	2HRS	9.604	15.573	4.51563	7.53664	3.02101	1	0.29777	2.24419	0.899567
0000009_30.tif	predator	2HRS	10.005	17.188	4.51563	8.23256	3.71693	1	0.29777	2.45141	1.10679
0000009_30.tif	predator	2HRS	10.188	17.141	4.51563	8.0689	3.55326	1	0.29777	2.40268	1.05806
0000009_30.tif	predator	2HRS	12.135	16.229	4.51563	6.08659	1.57096	1	0.29777	1.8124	0.467785
0000009_30.tif	predator	2HRS	10.891	15	4.51563	6.14933	1.6337	1	0.29777	1.83109	0.486466
0000009_30.tif	predator	2HRS	10.807	14.719	4.51563	6.06286	1.54723	1	0.29777	1.80534	0.460718
0000009_30.tif	predator	2HRS	11.719	10.839	4.51563	4.24922	-0.266416	0	0.29777	1.26529	-0.0793307
0000009_30.tif	predator	2HRS	12.036	10.359	4.51563	4.04005	-0.47558	0	0.29777	1.20301	-0.141613
0000009_30.tif	predator	2HRS	14.542	4.333	4.51563	7.2633	2.74767	1	0.29777	2.16279	0.818174
0000009_30.tif	predator	2HRS	14.661	4.307	4.51563	7.26724	2.75161	1	0.29777	2.16397	0.819346
0000009_30.tif	predator	2HRS	14.948	3.87	4.51563	7.65621	3.14058	1	0.29777	2.27979	0.935169
0000009_30.tif	predator	2HRS	15.25	4.448	4.51563	7.04811	2.53248	1	0.29777	2.09872	0.754096
0000009_30.tif	predator	2HRS	15.74	5.807	4.51563	5.65993	1.1443	1	0.29777	1.68536	0.340737
0000009_30.tif	predator	2HRS	16.016	6.635	4.51563	4.82991	0.314283	1	0.29777	1.4382	0.093584
0000009_30.tif	predator	2HRS	16.37	9.5	4.51563	2.01445	-2.50118	0	0.29777	0.599842	-0.744778
0000009_30.tif	predator	2HRS	13.734	9.349	4.51563	3.04312	-1.47251	0	0.29777	0.906149	-0.43847
0000009_30.tif	predator	2HRS	12.87	10.323	4.51563	3.25831	-1.25732	0	0.29777	0.970227	-0.374393
0000009_30.tif	predator	2HRS	12.745	10.344	4.51563	3.36864	-1.14699	0	0.29777	1.00308	-0.34154
0000009_30.tif	predator	2HRS	13.682	17.375	4.51563	6.3212	1.80556	1	0.29777	1.88226	0.537643
0000009_30.tif	predator	2HRS	18.391	15.677	4.51563	4.88317	0.367536	1	0.29777	1.45406	0.109441
0000009_30.tif	predator	2HRS	18.339	15.161	4.51563	4.41698	-0.0986535	0	0.29777	1.31524	-0.0293761
0000009_30.tif	predator	2HRS	18.349	15.052	4.51563	4.33175	-0.18388	0	0.29777	1.28987	-0.054754
0000009_30.tif	predator	2HRS	19.333	13.589	4.51563	4.01877	-0.496858	0	0.29777	1.19667	-0.147949
0000009_30.tif	predator	2HRS	19.698	13.073	4.51563	4.10452	-0.411115	0	0.29777	1.2222	-0.122418
0000009_30.tif	predator	2HRS	19.677	12.781	4.51563	3.97926	-0.536371	0	0.29777	1.1849	-0.159715
0000009_30.tif	predator	2HRS	18.854	11.714	4.51563	2.94264	-1.57299	0	0.29777	0.87623	-0.46839
0000009_30.tif	predator	2HRS	16.531	10.297	4.51563	1.31635	-3.19928	0	0.29777	0.391969	-0.952651
0000009_30.tif	predator	2HRS	17.052	9.844	4.51563	1.97517	-2.54046	0	0.29777	0.588147	-0.756473
0000009_30.tif	predator	2HRS	17.323	10.135	4.51563	1.93107	-2.58456	0	0.29777	0.575016	-0.769604
0000009_30.tif	predator	2HRS	17.557	9.479	4.51563	2.57166	-1.94397	0	0.29777	0.765764	-0.578856
0000009_30.tif	predator	2HRS	18.932	10.245	4.51563	3.24747	-1.26816	0	0.29777	0.966999	-0.377621
0000009_30.tif	predator	2HRS	19.036	10.406	4.51563	3.28882	-1.22681	0	0.29777	0.979313	-0.365307
0000009_30.tif	predator	2HRS	19.141	10.302	4.51563	3.42231	-1.09332	0	0.29777	1.01906	-0.325558
0000009_30.tif	predator	2HRS	20.089	13.312	4.51563	4.5584	0.0427662	1	0.29777	1.35735	0.0127345
0000009_30.tif	predator	2HRS	20.255	13	4.51563	4.59719	0.0815613	1	0.29777	1.36891	0.0242865
0000009_30.tif	predator	2HRS	20.578	12.094	4.51563	4.69843	0.182797	1	0.29777	1.39905	0.0544315
0000009_30.tif	predator	2HRS	20.391	11.948	4.51563	4.49513	-0.0204993	0	0.29777	1.33852	-0.00610407
0000009_30.tif	predator	2HRS	19.438	11.292	4.51563	3.5202	-0.995427	0	0.29777	1.04821	-0.296408
0000009_30.tif	predator	2HRS	21.193	15.359	4.51563	6.55397	2.03833	1	0.29777	1.95157	0.606955
0000009_30.tif	predator	2HRS	21.302	15.281	4.51563	6.59651	2.08087	1	0.29777	1.96424	0.619622
0000018_17.tif	control	2HRS	10.125	16.448	4.80721	8.10376	3.29655	1	0.29777	2.41306	0.981614
0000018_17.tif	control	2HRS	12.411	17.24	4.80721	7.55945	2.75224	1	0.29777	2.25098	0.819535
0000018_17.tif	control	2HRS	11.589	18.104	4.80721	8.68796	3.88074	1	0.29777	2.58701	1.15557
0000018_17.tif	control	2HRS	13.099	11.651	4.80721	2.67068	-2.13654	0	0.29777	0.795248	-0.636196
0000018_17.tif	control	2HRS	11.688	11.042	4.80721	3.787	-1.02021	0	0.29777	1.12766	-0.303788
0000018_17.tif	control	2HRS	10.573	10.609	4.80721	4.83807	0.0308576	1	0.29777	1.44063	0.00918847
0000018_17.tif	control	2HRS	10.635	10.552	4.80721	4.77282	-0.0343962	0	0.29777	1.4212	-0.0102422
0000018_17.tif	control	2HRS	11.281	10.625	4.80721	4.13304	-0.674177	0	0.29777	1.23069	-0.20075
0000018_17.tif	control	2HRS	11.536	10.422	4.80721	3.86702	-0.940192	0	0.29777	1.15148	-0.279961
0000018_17.tif	control	2HRS	12.016	10.495	4.80721	3.39079	-1.41643	0	0.29777	1.00967	-0.42177
0000018_17.tif	control	2HRS	13.12	10.396	4.80721	2.28315	-2.52407	0	0.29777	0.679853	-0.751591
0000018_17.tif	control	2HRS	12.396	9.917	4.80721	3.02893	-1.77828	0	0.29777	0.901925	-0.529519
0000018_17.tif	control	2HRS	12.531	9.87	4.80721	2.90159	-1.90562	0	0.29777	0.864007	-0.567437
0000018_17.tif	control	2HRS	12.406	9.766	4.80721	3.04171	-1.76551	0	0.29777	0.905729	-0.525715
0000018_17.tif	control	2HRS	12.047	9.547	4.80721	3.43683	-1.37038	0	0.29777	1.02339	-0.408058
0000018_17.tif	control	2HRS	12.068	9.453	4.80721	3.4382	-1.36901	0	0.29777	1.02379	-0.407651
0000018_17.tif	control	2HRS	12.922	9.005	4.80721	2.79548	-2.01173	0	0.29777	0.83241	-0.599034
0000018_17.tif	control	2HRS	12.51	8.745	4.80721	3.28125	-1.52597	0	0.29777	0.977057	-0.454387
0000018_17.tif	control	2HRS	14.182	4.568	4.80721	5.85725	1.05004	1	0.29777	1.74411	0.31267
0000018_17.tif	control	2HRS	14.349	4.682	4.80721	5.7127	0.905486	1	0.29777	1.70107	0.269627
0000018_17.tif	control	2HRS	14.917	5.016	4.80721	5.30313	0.49592	1	0.29777	1.57911	0.14767
0000018_17.tif	control	2HRS	15.406	5.005	4.80721	5.292	0.484789	1	0.29777	1.5758	0.144356
0000018_17.tif	control	2HRS	15.573	4.974	4.80721	5.32578	0.518565	1	0.29777	1.58586	0.154413
0000018_17.tif	control	2HRS	15.057	5.542	4.80721	4.76743	-0.039786	0	0.29777	1.4196	-0.0118471
0000018_17.tif	control	2HRS	15.016	5.604	4.80721	4.70877	-0.0984474	0	0.29777	1.40213	-0.0293147
0000018_17.tif	control	2HRS	14.865	5.854	4.80721	4.47521	-0.331999	0	0.29777	1.33258	-0.0988592
0000018_17.tif	control	2HRS	14.526	6.339	4.80721	4.05356	-0.753648	0	0.29777	1.20703	-0.224414
0000018_17.tif	control	2HRS	14.724	6.823	4.80721	3.53935	-1.26786	0	0.29777	1.05391	-0.377531
0000018_17.tif	control	2HRS	14.964	6.932	4.80721	3.39326	-1.41396	0	0.29777	1.01041	-0.421034
0000018_17.tif	control	2HRS	15.021	6.906	4.80721	3.41223	-1.39499	0	0.29777	1.01606	-0.415386
0000018_17.tif	control	2HRS	16.786	5.943	4.80721	4.56898	-0.238237	0	0.29777	1.3605	-0.0709399
0000018_17.tif	control	2HRS	14.245	7.974	4.80721	2.59474	-2.21248	0	0.29777	0.772635	-0.658809
0000018_17.tif	control	2HRS	14.766	7.797	4.80721	2.57938	-2.22783	0	0.29777	0.768063	-0.66338
0000018_17.tif	control	2HRS	14.849	7.75	4.80721	2.60613	-2.20108	0	0.29777	0.776027	-0.655417
0000018_17.tif	control	2HRS	15.578	7.469	4.80721	2.83353	-1.97368	0	0.29777	0.843741	-0.587703
0000018_17.tif	control	2HRS	16.234	7.547	4.80721	2.87339	-1.93382	0	0.29777	0.85561	-0.575834
0000018_17.tif	control	2HRS	16.005	8.323	4.80721	2.06434	-2.74287	0	0.29777	0.614698	-0.816746
0000018_17.tif	control	2HRS	17.042	7.339	4.80721	3.3827	-1.42452	0	0.29777	1.00727	-0.424178
0000018_17.tif	control	2HRS	17.078	7.24	4.80721	3.48677	-1.32044	0	0.29777	1.03826	-0.393188
0000018_17.tif	control	2HRS	14.786	9.042	4.80721	1.39759	-3.40963	0	0.29777	0.41616	-1.01528
0000018_17.tif	control	2HRS	14.292	9.474	4.80721	1.38102	-3.4262	0	0.29777	0.411226	-1.02022
0000018_17.tif	control	2HRS	14.766	10.24	4.80721	0.637553	-4.16966	0	0.29777	0.189844	-1.2416
0000018_17.tif	control	2HRS	15.167	10.62	4.80721	0.398855	-4.40836	0	0.29777	0.118767	-1.31268
0000018_17.tif	control	2HRS	15.474	10.859	4.80721	0.566721	-4.24049	0	0.29777	0.168753	-1.26269
0000018_17.tif	control	2HRS	15.604	10.729	4.80721	0.477319	-4.32989	0	0.29777	0.142131	-1.28931
0000018_17.tif	control	2HRS	16.229	9.901	4.80721	0.917824	-3.88939	0	0.29777	0.2733	-1.15814
0000018_17.tif	control	2HRS	17.104	9.536	4.80721	1.8653	-2.94192	0	0.29777	0.555429	-0.876015
0000018_17.tif	control	2HRS	17.354	9.536	4.80721	2.09603	-2.71119	0	0.29777	0.624134	-0.80731
0000018_17.tif	control	2HRS	14.839	11.688	4.80721	1.50024	-3.30697	0	0.29777	0.446727	-0.984717
0000018_17.tif	control	2HRS	15.401	11.734	4.80721	1.437	-3.37021	0	0.29777	0.427895	-1.00355
0000018_17.tif	control	2HRS	15.266	11.932	4.80721	1.64056	-3.16665	0	0.29777	0.488511	-0.942933
0000018_17.tif	control	2HRS	16.302	12.365	4.80721	2.25575	-2.55146	0	0.29777	0.671696	-0.759748
0000018_17.tif	control	2HRS	18.856	11.95	4.80721	3.83007	-0.977143	0	0.29777	1.14048	-0.290964
0000018_17.tif	control	2HRS	17.766	11.578	4.80721	2.68964	-2.11757	0	0.29777	0.800895	-0.630548
0000018_17.tif	control	2HRS	19.661	11.786	4.80721	4.51273	-0.294484	0	0.29777	1.34376	-0.0876886
0000018_17.tif	control	2HRS	19.536	11.78	4.80721	4.39289	-0.41432	0	0.29777	1.30807	-0.123372
0000018_17.tif	control	2HRS	19.536	10.984	4.80721	4.19168	-0.615532	0	0.29777	1.24816	-0.183287
0000018_17.tif	control	2HRS	19.578	10.917	4.80721	4.22276	-0.58445	0	0.29777	1.25741	-0.174032
0000018_17.tif	control	2HRS	19.953	10.141	4.80721	4.55467	-0.252541	0	0.29777	1.35624	-0.0751991
0000018_17.tif	control	2HRS	19.568	9.531	4.80721	4.23682	-0.570393	0	0.29777	1.2616	-0.169846
0000018_17.tif	control	2HRS	19.016	8.339	4.80721	4.1112	-0.69601	0	0.29777	1.22419	-0.207251
0000023_24.tif	control	2HRS	9.297	9.807	4.84399	4.11447	-0.729516	0	0.29777	1.22517	-0.217228
0000023_24.tif	control	2HRS	9.182	10.302	4.84399	3.99474	-0.849252	0	0.29777	1.18951	-0.252882
0000023_24.tif	control	2HRS	10.349	9.542	4.84399	3.42314	-1.42084	0	0.29777	1.01931	-0.423085
0000023_24.tif	control	2HRS	11.297	9.844	4.84399	2.55914	-2.28484	0	0.29777	0.762036	-0.680358
0000023_24.tif	control	2HRS	11.323	9.964	4.84399	2.44865	-2.39534	0	0.29777	0.729134	-0.71326
0000023_24.tif	control	2HRS	11.375	9.031	4.84399	3.20559	-1.6384	0	0.29777	0.954527	-0.487867
0000023_24.tif	control	2HRS	11.333	8.062	4.84399	4.10517	-0.738819	0	0.29777	1.2224	-0.219998
0000023_24.tif	control	2HRS	12.609	7.99	4.84399	3.89272	-0.95127	0	0.29777	1.15913	-0.28326
0000023_24.tif	control	2HRS	13.521	8.167	4.84399	3.76751	-1.07647	0	0.29777	1.12185	-0.320542
0000023_24.tif	control	2HRS	13.656	8.49	4.84399	3.47871	-1.36528	0	0.29777	1.03586	-0.406538
0000023_24.tif	control	2HRS	14.432	8.771	4.84399	3.48208	-1.3619	0	0.29777	1.03686	-0.405534
0000023_24.tif	control	2HRS	13.818	9.562	4.84399	2.50585	-2.33814	0	0.29777	0.746166	-0.696228
0000023_24.tif	control	2HRS	13.917	10.141	4.84399	2.03389	-2.81009	0	0.29777	0.605633	-0.836761
0000023_24.tif	control	2HRS	13.693	11.115	4.84399	1.13204	-3.71194	0	0.29777	0.337088	-1.10531
0000023_24.tif	control	2HRS	12.578	12.854	4.84399	1.01716	-3.82683	0	0.29777	0.30288	-1.13951
0000023_24.tif	control	2HRS	13.484	12.755	4.84399	1.08227	-3.76172	0	0.29777	0.322266	-1.12013
0000023_24.tif	control	2HRS	13.5	12.698	4.84399	1.04625	-3.79773	0	0.29777	0.311543	-1.13085
0000023_24.tif	control	2HRS	13.964	11.99	4.84399	1.11594	-3.72805	0	0.29777	0.332294	-1.1101
0000023_24.tif	control	2HRS	14.026	11.922	4.84399	1.17294	-3.67105	0	0.29777	0.349267	-1.09313
0000023_24.tif	control	2HRS	14.099	12.24	4.84399	1.2974	-3.54659	0	0.29777	0.386327	-1.05607
0000023_24.tif	control	2HRS	14.714	12.198	4.84399	1.88784	-2.95615	0	0.29777	0.562141	-0.880253
0000023_24.tif	control	2HRS	13.625	13.422	4.84399	1.72848	-3.11551	0	0.29777	0.51469	-0.927704
0000023_24.tif	control	2HRS	13.568	13.5	4.84399	1.77494	-3.06904	0	0.29777	0.528525	-0.913869
0000023_24.tif	control	2HRS	13.464	14.219	4.84399	2.42207	-2.42191	0	0.29777	0.721221	-0.721174
0000023_24.tif	control	2HRS	13.406	14.13	4.84399	2.32158	-2.52241	0	0.29777	0.691297	-0.751098
0000023_24.tif	control	2HRS	12.547	14.484	4.84399	2.627	-2.21699	0	0.29777	0.782242	-0.660152
0000023_24.tif	control	2HRS	9.729	15.109	4.84399	4.49715	-0.346835	0	0.29777	1.33912	-0.103277
0000023_24.tif	control	2HRS	9.615	14.984	4.84399	4.48965	-0.354332	0	0.29777	1.33688	-0.10551
0000023_24.tif	control	2HRS	12.938	15.375	4.84399	3.50101	-1.34298	0	0.29777	1.0425	-0.399899
0000023_24.tif	control	2HRS	12.911	15.464	4.84399	3.58945	-1.25453	0	0.29777	1.06883	-0.373563
0000023_24.tif	control	2HRS	13.005	15.49	4.84399	3.61815	-1.22584	0	0.29777	1.07738	-0.365017
0000023_24.tif	control	2HRS	14.208	15.807	4.84399	4.1586	-0.685389	0	0.29777	1.23831	-0.204088
0000023_24.tif	control	2HRS	14.568	15.797	4.84399	4.28017	-0.563814	0	0.29777	1.27451	-0.167887
0000023_24.tif	control	2HRS	14.719	15.885	4.84399	4.42248	-0.421508	0	0.29777	1.31688	-0.125512
0000023_24.tif	control	2HRS	15.802	15.292	4.84399	4.51294	-0.331051	0	0.29777	1.34382	-0.0985771
0000023_24.tif	control	2HRS	15.797	15.12	4.84399	4.38078	-0.463203	0	0.29777	1.30447	-0.137928
0000023_24.tif	control	2HRS	15.391	14.536	4.84399	3.67659	-1.1674	0	0.29777	1.09478	-0.347617
0000023_24.tif	control	2HRS	16.271	14.422	4.84399	4.26182	-0.582169	0	0.29777	1.26904	-0.173352
0000023_24.tif	control	2HRS	16.042	14.255	4.84399	3.97841	-0.865578	0	0.29777	1.18465	-0.257743
0000023_24.tif	control	2HRS	17.104	13.307	4.84399	4.48477	-0.359222	0	0.29777	1.33543	-0.106965
0000023_24.tif	control	2HRS	16.62	13.255	4.84399	4.01088	-0.833108	0	0.29777	1.19432	-0.248074
0000023_24.tif	control	2HRS	16.667	13.193	4.84399	4.03436	-0.809623	0	0.29777	1.20131	-0.241082
0000023_24.tif	control	2HRS	16.578	12.792	4.84399	3.83524	-1.00875	0	0.29777	1.14202	-0.300375
0000023_24.tif	control	2HRS	16.432	10.807	4.84399	3.73399	-1.10999	0	0.29777	1.11187	-0.330523
0000023_24.tif	control	2HRS	16.51	10.807	4.84399	3.8088	-1.03519	0	0.29777	1.13415	-0.308248
0000023_24.tif	control	2HRS	15.927	10.833	4.84399	3.24486	-1.59913	0	0.29777	0.966221	-0.476173
0000023_24.tif	control	2HRS	15.938	10.729	4.84399	3.29004	-1.55395	0	0.29777	0.979676	-0.462718
0000023_24.tif	control	2HRS	15.693	10.958	4.84399	2.98342	-1.86056	0	0.29777	0.888374	-0.55402
0000023_24.tif	control	2HRS	15.135	10.38	4.84399	2.72727	-2.11672	0	0.29777	0.812098	-0.630296
0000023_24.tif	control	2HRS	14.865	8.688	4.84399	3.76843	-1.07555	0	0.29777	1.12213	-0.320268
0000023_24.tif	control	2HRS	14.927	8.635	4.84399	3.84642	-0.99757	0	0.29777	1.14535	-0.297046
0000023_24.tif	control	2HRS	14.964	8.182	4.84399	4.25328	-0.590712	0	0.29777	1.2665	-0.175896
0000024_19.tif	control	2HRS	10.312	9.792	5.31777	3.82143	-1.49634	0	0.29777	1.13791	-0.445566
0000024_19.tif	control	2HRS	6.658	18.304	5.31777	10.1056	4.7878	1	0.29777	3.00913	1.42566
0000024_19.tif	control	2HRS	10.703	13.734	5.31777	4.03866	-1.27911	0	0.29777	1.20259	-0.380881
0000024_19.tif	control	2HRS	10.781	12.917	5.31777	3.51771	-1.80006	0	0.29777	1.04747	-0.536003
0000024_19.tif	control	2HRS	11.938	13.443	5.31777	2.94256	-2.3752	0	0.29777	0.876207	-0.707264
0000024_19.tif	control	2HRS	12.88	13.271	5.31777	2.27809	-3.03968	0	0.29777	0.678347	-0.905125
0000024_19.tif	control	2HRS	12.917	13.24	5.31777	2.23429	-3.08348	0	0.29777	0.665304	-0.918168
0000024_19.tif	control	2HRS	13.495	13.328	5.31777	2.14511	-3.17266	0	0.29777	0.638749	-0.944723
0000024_19.tif	control	2HRS	13.089	14.667	5.31777	3.53781	-1.77996	0	0.29777	1.05345	-0.530018
0000024_19.tif	control	2HRS	13.453	16.016	5.31777	4.81913	-0.498635	0	0.29777	1.43499	-0.148478
0000024_19.tif	control	2HRS	13.349	15.953	5.31777	4.76636	-0.551404	0	0.29777	1.41928	-0.164192
0000024_19.tif	control	2HRS	11.63	8.151	5.31777	3.78819	-1.52957	0	0.29777	1.12801	-0.455461
0000024_19.tif	control	2HRS	11.667	7.698	5.31777	4.14332	-1.17445	0	0.29777	1.23376	-0.349715
0000024_19.tif	control	2HRS	13.562	8.271	5.31777	2.95795	-2.35982	0	0.29777	0.880788	-0.702683
0000024_19.tif	control	2HRS	14.688	9.188	5.31777	2.18904	-3.12872	0	0.29777	0.651832	-0.93164
0000024_19.tif	control	2HRS	15.641	8.333	5.31777	3.38758	-1.93019	0	0.29777	1.00872	-0.574752
0000024_19.tif	control	2HRS	15.089	12.25	5.31777	1.60817	-3.7096	0	0.29777	0.478863	-1.10461
0000024_19.tif	control	2HRS	15.026	12.167	5.31777	1.50668	-3.81108	0	0.29777	0.448645	-1.13483
0000024_19.tif	control	2HRS	13.714	13.979	5.31777	2.7688	-2.54897	0	0.29777	0.824465	-0.759006
0000024_19.tif	control	2HRS	15.172	15.635	5.31777	4.61186	-0.705912	0	0.29777	1.37327	-0.210199
0000024_19.tif	control	2HRS	15.859	11.714	5.31777	2.06155	-3.25621	0	0.29777	0.613869	-0.969603
0000024_19.tif	control	2HRS	16.432	11.292	5.31777	2.57418	-2.74359	0	0.29777	0.766514	-0.816957
0000024_19.tif	control	2HRS	16.49	11.182	5.31777	2.63119	-2.68657	0	0.29777	0.783491	-0.799981
0000024_19.tif	control	2HRS	16.964	10.948	5.31777	3.11637	-2.20139	0	0.29777	0.927962	-0.655509
0000024_19.tif	control	2HRS	17.292	11.094	5.31777	3.4351	-1.88267	0	0.29777	1.02287	-0.560603
0000024_19.tif	control	2HRS	17.781	11.661	5.31777	3.94739	-1.37038	0	0.29777	1.17541	-0.408057
0000024_19.tif	control	2HRS	17.865	11.786	5.31777	4.04663	-1.27114	0	0.29777	1.20497	-0.378506
0000024_19.tif	control	2HRS	18.495	11.328	5.31777	4.6374	-0.680366	0	0.29777	1.38088	-0.202593
0000024_19.tif	control	2HRS	17.891	9.807	5.31777	4.27044	-1.04733	0	0.29777	1.27161	-0.311862
0000024_19.tif	control	2HRS	20.453	12.609	5.31777	6.73995	1.42218	1	0.29777	2.00695	0.423482
0000024_19.tif	control	2HRS	20.349	15.582	5.31777	7.82301	2.50525	1	0.29777	2.32946	0.745987
0000024_19.tif	control	2HRS	20.127	15.714	5.31777	7.71608	2.39831	1	0.29777	2.29762	0.714144
0000024_19.tif	control	2HRS	19.752	15.866	5.31777	7.5079	2.19013	1	0.29777	2.23563	0.652156
0000024_20.tif	control	2HRS	11.411	16.969	4.69787	4.17147	-0.526407	0	0.29777	1.24214	-0.156748
0000024_20.tif	control	2HRS	11.349	16.906	4.69787	4.12401	-0.573862	0	0.29777	1.22801	-0.170879
0000024_20.tif	control	2HRS	11.344	16.724	4.69787	3.94849	-0.749379	0	0.29777	1.17574	-0.223143
0000024_20.tif	control	2HRS	11.297	16.682	4.69787	3.9197	-0.778177	0	0.29777	1.16717	-0.231718
0000024_20.tif	control	2HRS	11.458	16.573	4.69787	3.77487	-0.923003	0	0.29777	1.12404	-0.274843
0000024_20.tif	control	2HRS	11.568	16	4.69787	3.19192	-1.50595	0	0.29777	0.950458	-0.448428
0000024_20.tif	control	2HRS	10.781	16.62	4.69787	4.02643	-0.671444	0	0.29777	1.19895	-0.199936
0000024_20.tif	control	2HRS	10.854	16.224	4.69787	3.63337	-1.06451	0	0.29777	1.08191	-0.316978
0000024_20.tif	control	2HRS	10.255	16.599	4.69787	4.23597	-0.461902	0	0.29777	1.26135	-0.13754
0000024_20.tif	control	2HRS	9.828	16.167	4.69787	4.10727	-0.5906	0	0.29777	1.22302	-0.175863
0000024_20.tif	control	2HRS	10.385	14.589	4.69787	2.56507	-2.1328	0	0.29777	0.763801	-0.635085
0000024_20.tif	control	2HRS	10.432	14.677	4.69787	2.58966	-2.10821	0	0.29777	0.771124	-0.627761
0000024_20.tif	control	2HRS	10.573	14.505	4.69787	2.36918	-2.3287	0	0.29777	0.70547	-0.693416
0000024_20.tif	control	2HRS	10.661	14.062	4.69787	2.02123	-2.67665	0	0.29777	0.601861	-0.797025
0000024_20.tif	control	2HRS	11.615	14.411	4.69787	1.66764	-3.03023	0	0.29777	0.496574	-0.902312
0000024_20.tif	control	2HRS	9.193	14.562	4.69787	3.53606	-1.16181	0	0.29777	1.05293	-0.345953
0000024_20.tif	control	2HRS	8.599	13.396	4.69787	3.74651	-0.951359	0	0.29777	1.1156	-0.283286
0000024_20.tif	control	2HRS	8.635	13.385	4.69787	3.70937	-0.9885	0	0.29777	1.10454	-0.294346
0000024_20.tif	control	2HRS	9.906	13.375	4.69787	2.45322	-2.24466	0	0.29777	0.730495	-0.668391
0000024_20.tif	control	2HRS	10.01	13.365	4.69787	2.34929	-2.34858	0	0.29777	0.699548	-0.699338
0000024_20.tif	control	2HRS	10.036	12.245	4.69787	2.36727	-2.3306	0	0.29777	0.704903	-0.693983
0000024_20.tif	control	2HRS	9.833	12.276	4.69787	2.55536	-2.14252	0	0.29777	0.760908	-0.637978
0000024_20.tif	control	2HRS	9.661	12.219	4.69787	2.73608	-1.96179	0	0.29777	0.814722	-0.584163
0000024_20.tif	control	2HRS	10.667	12.266	4.69787	1.76151	-2.93636	0	0.29777	0.524525	-0.87436
0000024_20.tif	control	2HRS	9.266	11.807	4.69787	3.23482	-1.46306	0	0.29777	0.963231	-0.435655
0000024_20.tif	control	2HRS	8.521	11.859	4.69787	3.93027	-0.7676	0	0.29777	1.17032	-0.228568
0000024_20.tif	control	2HRS	8.625	11.333	4.69787	4.00461	-0.693259	0	0.29777	1.19245	-0.206432
0000024_20.tif	control	2HRS	8.969	11.141	4.69787	3.77567	-0.922205	0	0.29777	1.12428	-0.274605
0000024_20.tif	control	2HRS	9.385	11.391	4.69787	3.29125	-1.40662	0	0.29777	0.980037	-0.418849
0000024_20.tif	control	2HRS	9.734	10.964	4.69787	3.2216	-1.47627	0	0.29777	0.959296	-0.43959
0000024_20.tif	control	2HRS	8.797	10.786	4.69787	4.09967	-0.5982	0	0.29777	1.22076	-0.178126
0000024_20.tif	control	2HRS	10.214	10.536	4.69787	3.15772	-1.54015	0	0.29777	0.940275	-0.458611
0000024_20.tif	control	2HRS	10.146	10.458	4.69787	3.2612	-1.43668	0	0.29777	0.971086	-0.427799
0000024_20.tif	control	2HRS	10.396	9.927	4.69787	3.53356	-1.16432	0	0.29777	1.05219	-0.346699
0000024_20.tif	control	2HRS	10.151	9.5	4.69787	4.02526	-0.672611	0	0.29777	1.1986	-0.200283
0000024_20.tif	control	2HRS	10.208	9.396	4.69787	4.08373	-0.614148	0	0.29777	1.21601	-0.182875
0000024_20.tif	control	2HRS	12.339	10.302	4.69787	2.59414	-2.10373	0	0.29777	0.772457	-0.626429
0000024_20.tif	control	2HRS	12.812	9.391	4.69787	3.54048	-1.15739	0	0.29777	1.05425	-0.344636
0000024_20.tif	control	2HRS	13.151	10.469	4.69787	2.56793	-2.12995	0	0.29777	0.764652	-0.634234
0000024_20.tif	control	2HRS	13.234	10.448	4.69787	2.61587	-2.082	0	0.29777	0.778928	-0.619958
0000024_20.tif	control	2HRS	14.125	14.88	4.69787	2.68761	-2.01027	0	0.29777	0.800288	-0.598597
0000024_20.tif	control	2HRS	14.224	14.786	4.69787	2.68846	-2.00941	0	0.29777	0.800544	-0.598342
0000024_20.tif	control	2HRS	12.859	16.198	4.69787	3.347	-1.35087	0	0.29777	0.996636	-0.402249
0000024_20.tif	control	2HRS	12.844	16.547	4.69787	3.68956	-1.00832	0	0.29777	1.09864	-0.300247
0000024_20.tif	control	2HRS	12.5	16.646	4.69787	3.75471	-0.943164	0	0.29777	1.11804	-0.280846
0000024_20.tif	control	2HRS	15.318	11.25	4.69787	3.42715	-1.27072	0	0.29777	1.0205	-0.378384
0000027_21.tif	control	2HRS	14.568	16.255	4.75515	4.27509	-0.480059	0	0.29777	1.27299	-0.142947
0000027_21.tif	control	2HRS	14.807	16.026	4.75515	4.04233	-0.712817	0	0.29777	1.20369	-0.212255
0000027_21.tif	control	2HRS	12.917	15.156	4.75515	3.66604	-1.08911	0	0.29777	1.09164	-0.324305
0000027_21.tif	control	2HRS	13.464	14.74	4.75515	3.04339	-1.71176	0	0.29777	0.90623	-0.509711
0000027_21.tif	control	2HRS	11.719	14.021	4.75515	3.65604	-1.09911	0	0.29777	1.08866	-0.327281
0000027_21.tif	control	2HRS	11.979	13.911	4.75515	3.37928	-1.37588	0	0.29777	1.00625	-0.409694
0000027_21.tif	control	2HRS	12.094	13.849	4.75515	3.24948	-1.50567	0	0.29777	0.967599	-0.448342
0000027_21.tif	control	2HRS	12.719	14.005	4.75515	2.86875	-1.8864	0	0.29777	0.854228	-0.561713
0000027_21.tif	control	2HRS	12.12	13.208	4.75515	2.90541	-1.84974	0	0.29777	0.865144	-0.550798
0000027_21.tif	control	2HRS	12.151	12.63	4.75515	2.68293	-2.07222	0	0.29777	0.798897	-0.617044
0000027_21.tif	control	2HRS	12.036	12.438	4.75515	2.75664	-1.99851	0	0.29777	0.820845	-0.595096
0000027_21.tif	control	2HRS	13.198	10.802	4.75515	1.95483	-2.80032	0	0.29777	0.582091	-0.833851
0000027_21.tif	control	2HRS	14.365	11.073	4.75515	0.99097	-3.76418	0	0.29777	0.295081	-1.12086
0000027_21.tif	control	2HRS	14.089	11.443	4.75515	0.858043	-3.89711	0	0.29777	0.255499	-1.16044
0000027_21.tif	control	2HRS	11.823	9.589	4.75515	3.78585	-0.969302	0	0.29777	1.12731	-0.288629
0000027_21.tif	control	2HRS	12	9.406	4.75515	3.77308	-0.982074	0	0.29777	1.12351	-0.292432
0000027_21.tif	control	2HRS	11.932	9.297	4.75515	3.89734	-0.857806	0	0.29777	1.16051	-0.255429
0000027_21.tif	control	2HRS	12.547	8.896	4.75515	3.79618	-0.958968	0	0.29777	1.13039	-0.285552
0000027_21.tif	control	2HRS	12.927	8.729	4.75515	3.73318	-1.02197	0	0.29777	1.11163	-0.304313
0000027_21.tif	control	2HRS	13.25	8.604	4.75515	3.69992	-1.05523	0	0.29777	1.10173	-0.314215
0000027_21.tif	control	2HRS	13.151	8.484	4.75515	3.85004	-0.90511	0	0.29777	1.14643	-0.269515
0000027_21.tif	control	2HRS	13.849	9.589	4.75515	2.56064	-2.19451	0	0.29777	0.762481	-0.65346
0000027_21.tif	control	2HRS	14.797	9.542	4.75515	2.44236	-2.31279	0	0.29777	0.727262	-0.688679
0000027_21.tif	control	2HRS	14.917	9.458	4.75515	2.53119	-2.22396	0	0.29777	0.753712	-0.662229
0000027_21.tif	control	2HRS	14.562	10.12	4.75515	1.87397	-2.88119	0	0.29777	0.558011	-0.857931
0000027_21.tif	control	2HRS	14.068	8.828	4.75515	3.22991	-1.52524	0	0.29777	0.96177	-0.454172
0000027_21.tif	control	2HRS	14.37	8.625	4.75515	3.38099	-1.37416	0	0.29777	1.00676	-0.409183
0000027_21.tif	control	2HRS	16.036	9.552	4.75515	2.74874	-2.00641	0	0.29777	0.818493	-0.597448
0000027_21.tif	control	2HRS	17.521	10	4.75515	3.40397	-1.35118	0	0.29777	1.0136	-0.402341
0000027_21.tif	control	2HRS	17.802	9.208	4.75515	4.12194	-0.633212	0	0.29777	1.22739	-0.188551
0000027_21.tif	control	2HRS	18.557	9.182	4.75515	4.72297	-0.032185	0	0.29777	1.40636	-0.00958372
0000027_21.tif	control	2HRS	18.661	9.339	4.75515	4.71729	-0.0378572	0	0.29777	1.40467	-0.0112727
0000027_21.tif	control	2HRS	18.75	9.448	4.75515	4.73195	-0.0232042	0	0.29777	1.40903	-0.0069095
0000027_21.tif	control	2HRS	18.812	9.365	4.75515	4.82891	0.073763	1	0.29777	1.43791	0.0219644
0000027_21.tif	control	2HRS	18.87	9.328	4.75515	4.89771	0.142559	1	0.29777	1.45839	0.0424497
0000027_21.tif	control	2HRS	18.948	9.266	4.75515	4.99688	0.241725	1	0.29777	1.48792	0.0719785
0000027_21.tif	control	2HRS	16.234	10.589	4.75515	2.03309	-2.72206	0	0.29777	0.605394	-0.810547
0000027_21.tif	control	2HRS	15.844	10.849	4.75515	1.57294	-3.18221	0	0.29777	0.468375	-0.947566
0000027_21.tif	control	2HRS	15.333	11.245	4.75515	0.938192	-3.81696	0	0.29777	0.279366	-1.13658
0000027_21.tif	control	2HRS	15.807	11.25	4.75515	1.28275	-3.4724	0	0.29777	0.381966	-1.03398
0000027_21.tif	control	2HRS	17.135	14.057	4.75515	3.15622	-1.59893	0	0.29777	0.939828	-0.476113
0000027_21.tif	control	2HRS	16.536	14.672	4.75515	3.22449	-1.53067	0	0.29777	0.960155	-0.455786
0000027_21.tif	control	2HRS	17.917	13.656	4.75515	3.57685	-1.1783	0	0.29777	1.06508	-0.350864
0000027_21.tif	control	2HRS	15.708	15.724	4.75515	3.85951	-0.895642	0	0.29777	1.14925	-0.266695
0000029_25.tif	predator	2HRS	9.703	14.651	5.53662	6.45546	0.918833	1	0.29777	1.92224	0.273601
0000029_25.tif	predator	2HRS	9.932	14.474	5.53662	6.16766	0.631041	1	0.29777	1.83655	0.187905
0000029_25.tif	predator	2HRS	9.714	14.151	5.53662	6.19728	0.660655	1	0.29777	1.84536	0.196723
0000029_25.tif	predator	2HRS	11.651	12.74	5.53662	3.8407	-1.69592	0	0.29777	1.14365	-0.504995
0000029_25.tif	predator	2HRS	9.807	10.922	5.53662	5.39628	-0.140339	0	0.29777	1.60685	-0.0417887
0000029_25.tif	predator	2HRS	12.74	13.151	5.53662	3.10033	-2.4363	0	0.29777	0.923184	-0.725456
0000029_25.tif	predator	2HRS	14.359	15.24	5.53662	4.07134	-1.46529	0	0.29777	1.21232	-0.436318
0000029_25.tif	predator	2HRS	14.297	15.307	5.53662	4.14988	-1.38674	0	0.29777	1.23571	-0.41293
0000029_25.tif	predator	2HRS	14.594	16.188	5.53662	4.96923	-0.567389	0	0.29777	1.47969	-0.168951
0000029_25.tif	predator	2HRS	17.443	19.844	5.53662	8.87882	3.3422	1	0.29777	2.64385	0.995206
0000029_25.tif	predator	2HRS	15.255	15.724	5.53662	4.46943	-1.06719	0	0.29777	1.33086	-0.317778
0000029_25.tif	predator	2HRS	18.312	13.729	5.53662	3.98106	-1.55556	0	0.29777	1.18544	-0.4632
0000029_25.tif	predator	2HRS	19.078	11.797	5.53662	3.92263	-1.614	0	0.29777	1.16804	-0.4806
0000029_25.tif	predator	2HRS	23.175	12.53	5.53662	8.08319	2.54657	1	0.29777	2.40693	0.758291
0000029_25.tif	predator	2HRS	22.953	13.773	5.53662	8.1583	2.62168	1	0.29777	2.4293	0.780658
0000029_25.tif	predator	2HRS	22.557	15.328	5.53662	8.41533	2.87871	1	0.29777	2.50583	0.857193
0000029_25.tif	predator	2HRS	21.3	19.304	5.53662	10.1036	4.56693	1	0.29777	3.00854	1.3599
0000029_25.tif	predator	2HRS	21.363	19.505	5.53662	10.302	4.76539	1	0.29777	3.06763	1.41899
0000008_23.tif	predator	2HRS	10.104	12.562	5.0887	3.93294	-1.15575	0	0.29777	1.17111	-0.344148
0000008_23.tif	predator	2HRS	9.719	12.198	5.0887	4.12504	-0.963656	0	0.29777	1.22831	-0.286948
0000008_23.tif	predator	2HRS	9.646	12.266	5.0887	4.21827	-0.870423	0	0.29777	1.25608	-0.259186
0000008_23.tif	predator	2HRS	9.63	12.161	5.0887	4.19439	-0.894308	0	0.29777	1.24896	-0.266298
0000008_23.tif	predator	2HRS	11.495	12.234	5.0887	2.58554	-2.50315	0	0.29777	0.769897	-0.745364
0000008_23.tif	predator	2HRS	10.469	10.901	5.0887	3.08734	-2.00135	0	0.29777	0.919318	-0.595943
0000008_23.tif	predator	2HRS	8.839	10.62	5.0887	4.70818	-0.380518	0	0.29777	1.40195	-0.113307
0000008_23.tif	predator	2HRS	9.625	9.703	5.0887	4.03731	-1.05139	0	0.29777	1.20219	-0.313072
0000008_23.tif	predator	2HRS	9.318	9.5	5.0887	4.38547	-0.703224	0	0.29777	1.30586	-0.209399
0000008_23.tif	predator	2HRS	9.443	9.469	5.0887	4.2736	-0.815093	0	0.29777	1.27255	-0.24271
0000008_23.tif	predator	2HRS	9.385	9.312	5.0887	4.37516	-0.713534	0	0.29777	1.30279	-0.212469
0000008_23.tif	predator	2HRS	11.062	7.536	5.0887	3.9926	-1.0961	0	0.29777	1.18888	-0.326385
0000008_23.tif	predator	2HRS	10.505	7.885	5.0887	4.11824	-0.970451	0	0.29777	1.22629	-0.288971
0000008_23.tif	predator	2HRS	10.432	7.948	5.0887	4.13081	-0.957886	0	0.29777	1.23003	-0.28523
0000008_23.tif	predator	2HRS	12.198	7.208	5.0887	3.70716	-1.38154	0	0.29777	1.10388	-0.411381
0000008_23.tif	predator	2HRS	12.5	7.156	5.0887	3.65804	-1.43066	0	0.29777	1.08925	-0.426007
0000008_23.tif	predator	2HRS	12.797	7.292	5.0887	3.45147	-1.63722	0	0.29777	1.02774	-0.487516
0000008_23.tif	predator	2HRS	12.922	7.339	5.0887	3.38028	-1.70841	0	0.29777	1.00655	-0.508714
0000008_23.tif	predator	2HRS	12.495	9.036	5.0887	1.9358	-3.15289	0	0.29777	0.576424	-0.938837
0000008_23.tif	predator	2HRS	12.411	9.74	5.0887	1.46244	-3.62625	0	0.29777	0.435471	-1.07979
0000008_23.tif	predator	2HRS	12.349	10.448	5.0887	1.21679	-3.87191	0	0.29777	0.362323	-1.15294
0000008_23.tif	predator	2HRS	12.562	13.021	5.0887	2.55731	-2.53139	0	0.29777	0.76149	-0.753771
0000008_23.tif	predator	2HRS	12.651	12.99	5.0887	2.49541	-2.59329	0	0.29777	0.743057	-0.772204
0000008_23.tif	predator	2HRS	12.901	13.312	5.0887	2.72857	-2.36012	0	0.29777	0.812488	-0.702773
0000008_23.tif	predator	2HRS	12.958	13.5	5.0887	2.89946	-2.18924	0	0.29777	0.863371	-0.65189
0000008_23.tif	predator	2HRS	14.292	13.734	5.0887	3.16202	-1.92668	0	0.29777	0.941554	-0.573707
0000008_23.tif	predator	2HRS	14.688	14.307	5.0887	3.82037	-1.26833	0	0.29777	1.13759	-0.377671
0000008_23.tif	predator	2HRS	14.755	13.427	5.0887	3.01828	-2.07042	0	0.29777	0.898754	-0.616508
0000008_23.tif	predator	2HRS	13.901	12.49	5.0887	1.86294	-3.22575	0	0.29777	0.554729	-0.960532
0000008_23.tif	predator	2HRS	13.891	12.391	5.0887	1.76387	-3.32483	0	0.29777	0.525227	-0.990034
0000008_23.tif	predator	2HRS	14.37	11.339	5.0887	1.06631	-4.02239	0	0.29777	0.317515	-1.19775
0000008_23.tif	predator	2HRS	14.63	10.974	5.0887	1.12732	-3.96137	0	0.29777	0.335683	-1.17958
0000008_23.tif	predator	2HRS	14.656	10.859	5.0887	1.12654	-3.96216	0	0.29777	0.335449	-1.17981
0000008_23.tif	predator	2HRS	14.448	10.396	5.0887	0.939162	-4.14953	0	0.29777	0.279654	-1.23561
0000008_23.tif	predator	2HRS	14.292	10.271	5.0887	0.840907	-4.24779	0	0.29777	0.250397	-1.26486
0000008_23.tif	predator	2HRS	13.688	9.568	5.0887	1.10206	-3.98664	0	0.29777	0.32816	-1.1871
0000008_23.tif	predator	2HRS	13.516	8.365	5.0887	2.29621	-2.79249	0	0.29777	0.683742	-0.831519
0000008_23.tif	predator	2HRS	15.203	11.094	5.0887	1.71167	-3.37702	0	0.29777	0.509685	-1.00558
0000008_23.tif	predator	2HRS	15.24	11.167	5.0887	1.767	-3.3217	0	0.29777	0.526159	-0.989102
0000008_23.tif	predator	2HRS	16.417	11.927	5.0887	3.13682	-1.95187	0	0.29777	0.934052	-0.581209
0000008_23.tif	predator	2HRS	17.312	12.578	5.0887	4.22494	-0.863757	0	0.29777	1.25806	-0.257201
0000008_23.tif	predator	2HRS	17.349	12.474	5.0887	4.21215	-0.87655	0	0.29777	1.25425	-0.26101
0000008_23.tif	predator	2HRS	16.052	13.969	5.0887	4.14944	-0.939252	0	0.29777	1.23558	-0.279681
0000008_23.tif	predator	2HRS	15.297	13.484	5.0887	3.32142	-1.76728	0	0.29777	0.989019	-0.526242
0000008_23.tif	predator	2HRS	15.969	14.75	5.0887	4.75247	-0.336222	0	0.29777	1.41514	-0.100117
0000010_22.tif	predator	2HRS	11.352	18.377	4.64075	6.99952	2.35877	1	0.29777	2.08425	0.702372
0000010_22.tif	predator	2HRS	11.023	17.453	4.64075	6.21121	1.57046	1	0.29777	1.84951	0.467636
0000010_22.tif	predator	2HRS	11.092	17.273	4.64075	6.0185	1.37775	1	0.29777	1.79213	0.410253
0000010_22.tif	predator	2HRS	11.627	16.946	4.64075	5.54592	0.90517	1	0.29777	1.65141	0.269533
0000010_22.tif	predator	2HRS	12.415	16.547	4.64075	4.99505	0.354307	1	0.29777	1.48738	0.105502
0000010_22.tif	predator	2HRS	12.714	11.793	4.64075	0.431116	-4.20963	0	0.29777	0.128373	-1.2535
0000010_22.tif	predator	2HRS	10.266	11.45	4.64075	2.83692	-1.80383	0	0.29777	0.844748	-0.537127
0000010_22.tif	predator	2HRS	13.823	8.99	4.64075	2.70759	-1.93315	0	0.29777	0.80624	-0.575635
0000010_22.tif	predator	2HRS	15.854	13.427	4.64075	3.3063	-1.33445	0	0.29777	0.984516	-0.397359
0000010_22.tif	predator	2HRS	16.812	12.969	4.64075	3.95768	-0.683062	0	0.29777	1.17848	-0.203395
0000010_22.tif	predator	2HRS	17.156	13.859	4.64075	4.64401	0.00326561	1	0.29777	1.38285	0.000972401
0000010_22.tif	predator	2HRS	17.182	13.495	4.64075	4.50174	-0.139002	0	0.29777	1.34048	-0.0413906
0000010_22.tif	predator	2HRS	19.026	14.901	4.64075	6.78473	2.14398	1	0.29777	2.02029	0.638413
0000010_22.tif	predator	2HRS	18.875	14.578	4.64075	6.49897	1.85822	1	0.29777	1.9352	0.553323
0000010_22.tif	predator	2HRS	17.234	12.255	4.64075	4.18671	-0.454034	0	0.29777	1.24668	-0.135198
0000010_22.tif	predator	2HRS	17.589	12.062	4.64075	4.51381	-0.126938	0	0.29777	1.34408	-0.0377983
0000010_22.tif	predator	2HRS	19.073	11.656	4.64075	5.97427	1.33353	1	0.29777	1.77896	0.397084
0000010_22.tif	predator	2HRS	18.396	11.281	4.64075	5.30654	0.66579	1	0.29777	1.58013	0.198252
0000010_22.tif	predator	2HRS	18.609	10.604	4.64075	5.59912	0.958372	1	0.29777	1.66725	0.285374
0000010_22.tif	predator	2HRS	18.151	10.552	4.64075	5.15935	0.518605	1	0.29777	1.5363	0.154425
0000010_22.tif	predator	2HRS	17.891	9.854	4.64075	5.09983	0.459086	1	0.29777	1.51858	0.136702
0000020_24.tif	predator	2HRS	5.083	5.479	4.6825	10.1679	5.48544	1	0.29777	3.02771	1.6334
0000020_24.tif	predator	2HRS	4.901	5.854	4.6825	10.1193	5.43676	1	0.29777	3.01321	1.6189
0000020_24.tif	predator	2HRS	4.37	6.594	4.6825	10.227	5.54447	1	0.29777	3.04528	1.65098
0000020_24.tif	predator	2HRS	4.432	6.797	4.6825	10.0825	5.40004	1	0.29777	3.00228	1.60797
0000020_24.tif	predator	2HRS	5.464	6.885	4.6825	9.12015	4.43765	1	0.29777	2.71571	1.3214
0000020_24.tif	predator	2HRS	5.24	18.047	4.6825	10.8013	6.11882	1	0.29777	3.21631	1.822
0000020_24.tif	predator	2HRS	5.245	18.188	4.6825	10.8883	6.20584	1	0.29777	3.24222	1.84791
0000020_24.tif	predator	2HRS	10.359	14.219	4.6825	4.43117	-0.251334	0	0.29777	1.31947	-0.0748396
0000020_24.tif	predator	2HRS	10.964	13.938	4.6825	3.80789	-0.874609	0	0.29777	1.13388	-0.260432
0000020_24.tif	predator	2HRS	11.042	13.922	4.6825	3.7437	-0.9388	0	0.29777	1.11476	-0.279547
0000020_24.tif	predator	2HRS	9.099	13.297	4.6825	4.9379	0.255399	1	0.29777	1.47036	0.07605
0000020_24.tif	predator	2HRS	8.781	13.25	4.6825	5.20619	0.523689	1	0.29777	1.55025	0.155939
0000020_24.tif	predator	2HRS	7.76	13.401	4.6825	6.20642	1.52392	1	0.29777	1.84808	0.453776
0000020_24.tif	predator	2HRS	9.323	10.849	4.6825	4.22236	-0.460141	0	0.29777	1.25729	-0.137016
0000020_24.tif	predator	2HRS	9.438	10.25	4.6825	4.19142	-0.491081	0	0.29777	1.24808	-0.146229
0000020_24.tif	predator	2HRS	11.859	11.448	4.6825	1.70688	-2.97562	0	0.29777	0.508259	-0.88605
0000020_24.tif	predator	2HRS	11.781	11.396	4.6825	1.77504	-2.90746	0	0.29777	0.528555	-0.865754
0000020_24.tif	predator	2HRS	12.609	10.729	4.6825	1.01001	-3.67249	0	0.29777	0.300752	-1.09356
0000020_24.tif	predator	2HRS	12.156	12.792	4.6825	2.16024	-2.52226	0	0.29777	0.643255	-0.751053
0000020_24.tif	predator	2HRS	12.198	12.859	4.6825	2.18625	-2.49625	0	0.29777	0.650999	-0.743309
0000020_24.tif	predator	2HRS	12.224	15.401	4.6825	4.46797	-0.214528	0	0.29777	1.33043	-0.0638801
0000020_24.tif	predator	2HRS	13.271	15.526	4.6825	4.40398	-0.278522	0	0.29777	1.31137	-0.0829353
0000020_24.tif	predator	2HRS	14.536	14.932	4.6825	3.93131	-0.751191	0	0.29777	1.17063	-0.223682
0000020_24.tif	predator	2HRS	16.901	13.151	4.6825	3.92526	-0.757242	0	0.29777	1.16882	-0.225484
0000020_24.tif	predator	2HRS	16.771	13.057	4.6825	3.76544	-0.91706	0	0.29777	1.12124	-0.273073
0000020_24.tif	predator	2HRS	17.12	12.214	4.6825	3.74434	-0.938158	0	0.29777	1.11495	-0.279355
0000020_24.tif	predator	2HRS	18.969	13.245	4.6825	5.83016	1.14765	1	0.29777	1.73605	0.341737
0000020_24.tif	predator	2HRS	17.391	10.698	4.6825	3.87913	-0.803372	0	0.29777	1.15509	-0.23922
0000020_24.tif	predator	2HRS	17.052	9.693	4.6825	3.79832	-0.884183	0	0.29777	1.13103	-0.263283
0000020_24.tif	predator	2HRS	14.531	10.057	4.6825	1.46334	-3.21917	0	0.29777	0.435738	-0.958571
0000020_24.tif	predator	2HRS	16.703	11.255	4.6825	3.16947	-1.51304	0	0.29777	0.943772	-0.450537
0000020_24.tif	predator	2HRS	15.802	8.729	4.6825	3.30145	-1.38105	0	0.29777	0.983072	-0.411236
0000020_24.tif	predator	2HRS	15.792	8.24	4.6825	3.66628	-1.01622	0	0.29777	1.09171	-0.302599
0000020_24.tif	predator	2HRS	15.656	8.031	4.6825	3.75476	-0.927745	0	0.29777	1.11805	-0.276254
0000020_24.tif	predator	2HRS	15.266	1.823	4.6825	9.46642	4.78392	1	0.29777	2.81882	1.42451
0000031_18.tif	control	2HRS	7.26	15.266	5.02617	9.18082	4.15465	1	0.29777	2.73377	1.23713
0000031_18.tif	control	2HRS	9.99	18.688	5.02617	9.59809	4.57193	1	0.29777	2.85802	1.36138
0000031_18.tif	control	2HRS	12.823	15.812	5.02617	5.70868	0.682512	1	0.29777	1.69987	0.203232
0000031_18.tif	control	2HRS	13.635	14.542	5.02617	4.22266	-0.803506	0	0.29777	1.25738	-0.23926
0000031_18.tif	control	2HRS	13.172	13.87	5.02617	3.82546	-1.20071	0	0.29777	1.13911	-0.357535
0000031_18.tif	control	2HRS	13.083	13.807	5.02617	3.81983	-1.20633	0	0.29777	1.13743	-0.35921
0000031_18.tif	control	2HRS	13.375	13.583	5.02617	3.47475	-1.55142	0	0.29777	1.03468	-0.461965
0000031_18.tif	control	2HRS	14.339	13.562	5.02617	3.06824	-1.95793	0	0.29777	0.91363	-0.583012
0000031_18.tif	control	2HRS	14.526	14.188	5.02617	3.63683	-1.38933	0	0.29777	1.08294	-0.413702
0000031_18.tif	control	2HRS	13.109	12.755	5.02617	2.97679	-2.04938	0	0.29777	0.886399	-0.610242
0000031_18.tif	control	2HRS	13.026	12.682	5.02617	2.98373	-2.04244	0	0.29777	0.888465	-0.608176
0000031_18.tif	control	2HRS	14.094	12.797	5.02617	2.43914	-2.58702	0	0.29777	0.726304	-0.770337
0000031_18.tif	control	2HRS	11.49	11.349	5.02617	3.75563	-1.27054	0	0.29777	1.11831	-0.378329
0000031_18.tif	control	2HRS	13.167	9.688	5.02617	2.20641	-2.81975	0	0.29777	0.657004	-0.839637
0000031_18.tif	control	2HRS	13.219	9.578	5.02617	2.20843	-2.81773	0	0.29777	0.657605	-0.839037
0000031_18.tif	control	2HRS	13.26	9.635	5.02617	2.14579	-2.88037	0	0.29777	0.638952	-0.857689
0000031_18.tif	control	2HRS	13.37	9.542	5.02617	2.0942	-2.93196	0	0.29777	0.623591	-0.87305
0000031_18.tif	control	2HRS	13.401	9.474	5.02617	2.10349	-2.92268	0	0.29777	0.626356	-0.870286
0000031_18.tif	control	2HRS	12.698	8.693	5.02617	3.12917	-1.89699	0	0.29777	0.931774	-0.564867
0000031_18.tif	control	2HRS	12.594	8.63	5.02617	3.25	-1.77616	0	0.29777	0.967754	-0.528888
0000031_18.tif	control	2HRS	13.99	8.625	5.02617	2.30941	-2.71675	0	0.29777	0.687673	-0.808968
0000031_18.tif	control	2HRS	13.885	8.526	5.02617	2.44852	-2.57764	0	0.29777	0.729096	-0.767545
0000031_18.tif	control	2HRS	13.932	7.833	5.02617	3.04036	-1.98581	0	0.29777	0.905327	-0.591314
0000031_18.tif	control	2HRS	13.802	7.833	5.02617	3.09565	-1.93051	0	0.29777	0.921793	-0.574848
0000031_18.tif	control	2HRS	14.349	7.724	5.02617	3.00009	-2.02607	0	0.29777	0.893337	-0.603304
0000031_18.tif	control	2HRS	13.688	7.422	5.02617	3.51557	-1.5106	0	0.29777	1.04683	-0.449811
0000031_18.tif	control	2HRS	13.526	7.328	5.02617	3.67073	-1.35543	0	0.29777	1.09303	-0.403607
0000031_18.tif	control	2HRS	11.193	7.802	5.02617	4.86947	-0.156701	0	0.29777	1.44998	-0.0466609
0000031_18.tif	control	2HRS	11.146	7.865	5.02617	4.87219	-0.153979	0	0.29777	1.45079	-0.0458502
0000031_18.tif	control	2HRS	13.021	5.745	5.02617	5.31839	0.292226	1	0.29777	1.58366	0.0870162
0000031_18.tif	control	2HRS	16.214	6.656	5.02617	4.08803	-0.938138	0	0.29777	1.21729	-0.279349
0000031_18.tif	control	2HRS	16.13	6.62	5.02617	4.10242	-0.923742	0	0.29777	1.22158	-0.275063
0000031_18.tif	control	2HRS	16.458	8.635	5.02617	2.35594	-2.67022	0	0.29777	0.701529	-0.795112
0000031_18.tif	control	2HRS	16.146	8.802	5.02617	2.05278	-2.97338	0	0.29777	0.611258	-0.885384
0000031_18.tif	control	2HRS	15.464	9.141	5.02617	1.49676	-3.52941	0	0.29777	0.44569	-1.05095
0000031_18.tif	control	2HRS	16.078	9.776	5.02617	1.23074	-3.79542	0	0.29777	0.366478	-1.13016
0000031_18.tif	control	2HRS	16.161	9.812	5.02617	1.27017	-3.756	0	0.29777	0.378218	-1.11842
0000031_18.tif	control	2HRS	16.089	10.255	5.02617	0.982957	-4.04321	0	0.29777	0.292695	-1.20395
0000031_18.tif	control	2HRS	16.594	10.172	5.02617	1.48763	-3.53853	0	0.29777	0.442973	-1.05367
0000031_18.tif	control	2HRS	15.917	10.99	5.02617	0.836771	-4.18939	0	0.29777	0.249165	-1.24748
0000031_18.tif	control	2HRS	15.542	12.594	5.02617	2.01919	-3.00698	0	0.29777	0.601254	-0.895388
0000031_18.tif	control	2HRS	15.458	12.797	5.02617	2.20661	-2.81955	0	0.29777	0.657063	-0.839578
0000031_18.tif	control	2HRS	15.891	13.401	5.02617	2.88309	-2.14307	0	0.29777	0.858499	-0.638143
0000031_18.tif	control	2HRS	15.875	13.505	5.02617	2.9801	-2.04606	0	0.29777	0.887386	-0.609256
0000031_18.tif	control	2HRS	15.917	13.536	5.02617	3.02032	-2.00584	0	0.29777	0.899362	-0.59728
0000031_18.tif	control	2HRS	15.469	14.031	5.02617	3.43486	-1.5913	0	0.29777	1.0228	-0.473842
0000031_18.tif	control	2HRS	15.219	14.089	5.02617	3.48032	-1.54585	0	0.29777	1.03633	-0.460307
0000031_18.tif	control	2HRS	14.943	14.714	5.02617	4.11138	-0.914784	0	0.29777	1.22425	-0.272395
0000031_18.tif	control	2HRS	14.995	14.802	5.02617	4.19673	-0.829432	0	0.29777	1.24966	-0.24698
0000031_18.tif	control	2HRS	16.625	14.167	5.02617	3.84325	-1.18292	0	0.29777	1.1444	-0.352237
0000031_18.tif	control	2HRS	17.615	14.276	5.02617	4.40626	-0.619905	0	0.29777	1.31205	-0.184589
0000031_18.tif	control	2HRS	17.646	14.182	5.02617	4.34592	-0.680248	0	0.29777	1.29408	-0.202557
0000031_18.tif	control	2HRS	17.844	13.266	5.02617	3.76819	-1.25798	0	0.29777	1.12205	-0.374588
0000031_18.tif	control	2HRS	17.953	13.203	5.02617	3.803	-1.22317	0	0.29777	1.13242	-0.364223
0000031_18.tif	control	2HRS	19.01	13.786	5.02617	4.98233	-0.0438401	0	0.29777	1.48359	-0.0130543
0000031_18.tif	control	2HRS	19.224	14.01	5.02617	5.29013	0.263967	1	0.29777	1.57524	0.0786014
0000031_18.tif	control	2HRS	19.578	14.109	5.02617	5.62697	0.600808	1	0.29777	1.67554	0.178903
0000031_18.tif	control	2HRS	22.708	8.047	5.02617	7.95959	2.93343	1	0.29777	2.37013	0.873487
0000031_18.tif	control	2HRS	22.51	8.026	5.02617	7.77934	2.75317	1	0.29777	2.31645	0.819813
0000038_17.tif	control	2HRS	12.859	13.849	4.98971	3.07353	-1.91618	0	0.29777	0.915205	-0.570582
0000038_17.tif	control	2HRS	12.792	13.781	4.98971	3.05666	-1.93305	0	0.29777	0.910181	-0.575606
0000038_17.tif	control	2HRS	12.771	13.708	4.98971	3.01067	-1.97904	0	0.29777	0.896488	-0.589299
0000038_17.tif	control	2HRS	13.766	13.917	4.98971	2.73342	-2.25629	0	0.29777	0.813932	-0.671855
0000038_17.tif	control	2HRS	13.833	13.927	4.98971	2.72348	-2.26623	0	0.29777	0.810971	-0.674816
0000038_17.tif	control	2HRS	10.714	11.385	4.98971	3.88069	-1.10903	0	0.29777	1.15555	-0.330235
0000038_17.tif	control	2HRS	10.714	11.245	4.98971	3.88058	-1.10914	0	0.29777	1.15552	-0.330267
0000038_17.tif	control	2HRS	10.729	11.13	4.98971	3.86928	-1.12043	0	0.29777	1.15216	-0.333631
0000038_17.tif	control	2HRS	14.099	10.188	4.98971	1.22817	-3.76154	0	0.29777	0.365712	-1.12007
0000038_17.tif	control	2HRS	13.146	10.323	4.98971	1.75352	-3.2362	0	0.29777	0.522145	-0.963642
0000038_17.tif	control	2HRS	13.151	10.005	4.98971	1.94692	-3.04279	0	0.29777	0.579734	-0.906053
0000038_17.tif	control	2HRS	12.359	9.49	4.98971	2.88356	-2.10616	0	0.29777	0.858637	-0.62715
0000038_17.tif	control	2HRS	11.917	8.557	4.98971	3.8414	-1.14831	0	0.29777	1.14385	-0.341933
0000038_17.tif	control	2HRS	11.677	8.479	4.98971	4.0663	-0.923416	0	0.29777	1.21082	-0.274966
0000038_17.tif	control	2HRS	15.349	8.526	4.98971	2.88649	-2.10322	0	0.29777	0.85951	-0.626277
0000038_17.tif	control	2HRS	15.495	9.5	4.98971	2.02365	-2.96607	0	0.29777	0.602581	-0.883206
0000038_17.tif	control	2HRS	15.484	9.604	4.98971	1.92597	-3.06374	0	0.29777	0.573496	-0.912291
0000038_17.tif	control	2HRS	16.182	10.464	4.98971	1.80024	-3.18948	0	0.29777	0.536056	-0.949731
0000038_17.tif	control	2HRS	16.714	10.562	4.98971	2.24876	-2.74096	0	0.29777	0.669612	-0.816175
0000038_17.tif	control	2HRS	17.177	10.432	4.98971	2.72879	-2.26092	0	0.29777	0.812551	-0.673236
0000038_17.tif	control	2HRS	17.557	10.276	4.98971	3.1389	-1.85082	0	0.29777	0.934669	-0.551118
0000038_17.tif	control	2HRS	16.432	11.396	4.98971	1.83992	-3.1498	0	0.29777	0.547873	-0.937915
0000038_17.tif	control	2HRS	16.26	11.708	4.98971	1.71242	-3.2773	0	0.29777	0.509906	-0.975881
0000038_17.tif	control	2HRS	16.833	14.276	4.98971	3.71462	-1.27509	0	0.29777	1.1061	-0.379684
0000038_17.tif	control	2HRS	16.891	14.286	4.98971	3.75778	-1.23194	0	0.29777	1.11895	-0.366834
0000038_17.tif	control	2HRS	15.609	14.891	4.98971	3.72014	-1.26957	0	0.29777	1.10775	-0.37804
0000038_17.tif	control	2HRS	14.568	14.49	4.98971	3.17811	-1.81161	0	0.29777	0.946345	-0.539442
0000039_21.tif	predator	2HRS	6.51	17.161	4.42218	9.50225	5.08007	1	0.29777	2.82948	1.51269
0000039_21.tif	predator	2HRS	6.333	17.125	4.42218	9.62362	5.20144	1	0.29777	2.86563	1.54883
0000039_21.tif	predator	2HRS	6.083	15.688	4.42218	9.07898	4.6568	1	0.29777	2.70345	1.38665
0000039_21.tif	predator	2HRS	6.688	13.021	4.42218	7.59906	3.17688	1	0.29777	2.26277	0.94598
0000039_21.tif	predator	2HRS	6.688	12.828	4.42218	7.56239	3.14021	1	0.29777	2.25185	0.935059
0000039_21.tif	predator	2HRS	7.453	11.578	4.42218	6.67766	2.25548	1	0.29777	1.98841	0.671614
0000039_21.tif	predator	2HRS	7.281	11.578	4.42218	6.84965	2.42746	1	0.29777	2.03962	0.722826
0000039_21.tif	predator	2HRS	9.161	9.37	4.42218	5.4	0.977815	1	0.29777	1.60796	0.291164
0000039_21.tif	predator	2HRS	8.844	8.771	4.42218	5.94156	1.51938	1	0.29777	1.76922	0.452426
0000039_21.tif	predator	2HRS	7.792	8.354	4.42218	7.06874	2.64656	1	0.29777	2.10486	0.788067
0000039_21.tif	predator	2HRS	10.609	9.099	4.42218	4.25272	-0.169457	0	0.29777	1.26633	-0.0504591
0000039_21.tif	predator	2HRS	9.78	9.321	4.42218	4.85809	0.435912	1	0.29777	1.44659	0.129802
0000039_21.tif	predator	2HRS	13.738	15.214	4.42218	3.75054	-0.671639	0	0.29777	1.1168	-0.199994
0000039_21.tif	predator	2HRS	13.734	15.113	4.42218	3.65054	-0.771639	0	0.29777	1.08702	-0.229771
0000039_21.tif	predator	2HRS	13.773	14.943	4.42218	3.47737	-0.944807	0	0.29777	1.03546	-0.281335
0000039_21.tif	predator	2HRS	14.623	13.106	4.42218	1.69527	-2.72691	0	0.29777	0.5048	-0.811993
0000039_21.tif	predator	2HRS	13.755	11.474	4.42218	0.375133	-4.04705	0	0.29777	0.111703	-1.20509
0000039_21.tif	predator	2HRS	13.818	11.373	4.42218	0.331157	-4.09102	0	0.29777	0.0986086	-1.21818
0000039_21.tif	predator	2HRS	14.582	10.2	4.42218	1.36123	-3.06095	0	0.29777	0.405335	-0.911458
0000039_21.tif	predator	2HRS	13.29	9.957	4.42218	1.74279	-2.67939	0	0.29777	0.518952	-0.797841
0000039_21.tif	predator	2HRS	13.005	8.977	4.42218	2.74785	-1.67433	0	0.29777	0.818227	-0.498566
0000039_21.tif	predator	2HRS	16.405	8.307	4.42218	3.90755	-0.51463	0	0.29777	1.16355	-0.153241
0000039_21.tif	predator	2HRS	16.186	8.457	4.42218	3.65922	-0.762965	0	0.29777	1.0896	-0.227188
0000039_21.tif	predator	2HRS	16.002	8.564	4.42218	3.46854	-0.953639	0	0.29777	1.03283	-0.283965
0000039_21.tif	predator	2HRS	15.825	9.023	4.42218	2.98823	-1.43395	0	0.29777	0.889807	-0.426986
0000039_21.tif	predator	2HRS	16.05	10.082	4.42218	2.37739	-2.04479	0	0.29777	0.707917	-0.608876
0000039_21.tif	predator	2HRS	16.446	10.46	4.42218	2.53228	-1.8899	0	0.29777	0.754036	-0.562756
0000039_21.tif	predator	2HRS	15.7	11.036	4.42218	1.63267	-2.78951	0	0.29777	0.486159	-0.830633
0000039_21.tif	predator	2HRS	15.238	15.071	4.42218	3.75423	-0.667952	0	0.29777	1.1179	-0.198896
0000039_21.tif	predator	2HRS	16.245	19.974	4.42218	8.74948	4.32729	1	0.29777	2.60533	1.28854
0000039_21.tif	predator	2HRS	16.394	20.068	4.42218	8.87754	4.45536	1	0.29777	2.64347	1.32667
0000039_21.tif	predator	2HRS	20.177	17.365	4.42218	8.43519	4.01301	1	0.29777	2.51175	1.19495
0000039_21.tif	predator	2HRS	20.307	17.234	4.42218	8.43907	4.01688	1	0.29777	2.5129	1.19611
0000039_21.tif	predator	2HRS	19.844	15.177	4.42218	6.80353	2.38135	1	0.29777	2.02589	0.709095
0000039_21.tif	predator	2HRS	20.953	15.068	4.42218	7.70703	3.28485	1	0.29777	2.29492	0.978131
0000039_21.tif	predator	2HRS	19.896	14.74	4.42218	6.6218	2.19962	1	0.29777	1.97177	0.654982
0000039_21.tif	predator	2HRS	18.656	12.161	4.42218	4.57635	0.154172	1	0.29777	1.3627	0.0459077
0000039_21.tif	predator	2HRS	18.547	12.151	4.42218	4.46708	0.044896	1	0.29777	1.33016	0.0133687
0000039_21.tif	predator	2HRS	19.594	10.974	4.42218	5.48775	1.06557	1	0.29777	1.63409	0.317294
0000039_21.tif	predator	2HRS	20.536	10.052	4.42218	6.5641	2.14192	1	0.29777	1.95459	0.6378
0000048_20.tif	predator	2HRS	12.427	15.771	4.80721	4.28822	-0.518992	0	0.29777	1.2769	-0.15454
0000048_20.tif	predator	2HRS	11.75	11.745	4.80721	2.41324	-2.39397	0	0.29777	0.718591	-0.712853
0000048_20.tif	predator	2HRS	10.125	11.828	4.80721	4.03605	-0.771158	0	0.29777	1.20182	-0.229628
0000048_20.tif	predator	2HRS	9.964	11.714	4.80721	4.19917	-0.608042	0	0.29777	1.25039	-0.181057
0000048_20.tif	predator	2HRS	10.125	10.745	4.80721	4.18427	-0.622944	0	0.29777	1.24595	-0.185494
0000048_20.tif	predator	2HRS	11.135	10.219	4.80721	3.43709	-1.37012	0	0.29777	1.02346	-0.407982
0000048_20.tif	predator	2HRS	13.734	4.875	4.80721	6.98706	2.17985	1	0.29777	2.08054	0.649093
0000048_20.tif	predator	2HRS	13.755	5.25	4.80721	6.61148	1.80426	1	0.29777	1.9687	0.537256
0000048_20.tif	predator	2HRS	14.156	5.464	4.80721	6.385	1.57779	1	0.29777	1.90126	0.469818
0000048_20.tif	predator	2HRS	13.292	10.604	4.80721	1.51828	-3.28893	0	0.29777	0.452099	-0.979344
0000048_20.tif	predator	2HRS	13.656	10.75	4.80721	1.20947	-3.59774	0	0.29777	0.360145	-1.0713
0000048_20.tif	predator	2HRS	14.693	14.849	4.80721	3.04681	-1.76041	0	0.29777	0.907247	-0.524197
0000048_20.tif	predator	2HRS	18.328	11.531	4.80721	4.17912	-0.628097	0	0.29777	1.24442	-0.187028
0000048_20.tif	predator	2HRS	15.193	8.88	4.80721	3.14324	-1.66397	0	0.29777	0.935964	-0.49548
0000048_20.tif	predator	2HRS	16.672	7.505	4.80721	5.01752	0.210302	1	0.29777	1.49407	0.0626216
0000048_20.tif	predator	2HRS	16.146	7.396	4.80721	4.87539	0.0681776	1	0.29777	1.45175	0.0203012
0000048_20.tif	predator	2HRS	16.682	6.953	4.80721	5.50693	0.699715	1	0.29777	1.6398	0.208354
0000048_20.tif	predator	2HRS	16.651	6.766	4.80721	5.66012	0.85291	1	0.29777	1.68541	0.253971
0000048_20.tif	predator	2HRS	19.276	11.531	4.80721	5.12488	0.317662	1	0.29777	1.52603	0.0945903
[truncated: 1,434 more rows]
