# Supplementary material for: Dopamine signaling regulates predator-driven changes in Caenorhabditis elegans’ egg laying behavior
Source: eLife. 2023 Jul 11;12:e83957. doi: 10.7554/eLife.83957 (PMC10335835; doi:10.7554/eLife.83957)
Supplement: Figure 6—source data 1. — For each test arena, data tabulate the arena, predator exposure condition, genotype, <x,y> coordinates in pixels, lawn radius in pixels, the egg distance from arena center in pixels, the egg distance from lawn edge in pixels, position as 1 (off) or 0 (on) lawn, the conversion factor for pixel data in mm-per-pixel, the calculated distance from center in mm, the calculated distance from the lawn edge in mm. [file elife-83957-fig6-data1.xlsx]

## Sheet: Figure6A-C
Arena	Condition	Strain	Genotype	X	Y	LawnRadius	DistCenterPx	DistEdgePx	off	PxScale	DistCenterMm	DistEdgeMm
00000000_3.tif	predator	MT13113	tdc1	7.177	4.365	4.974	9.23943	4.26544	1	0.29777	2.75123	1.27012
00000000_3.tif	predator	MT13113	tdc1	7.075	4.436	4.974	9.25894	4.28494	1	0.29777	2.75703	1.27593
00000000_3.tif	predator	MT13113	tdc1	7.311	4.602	4.974	8.97551	4.00151	1	0.29777	2.67264	1.19153
00000000_3.tif	predator	MT13113	tdc1	5.269	6.814	4.974	9.2973	4.3233	1	0.29777	2.76846	1.28735
00000000_3.tif	predator	MT13113	tdc1	4.894	7.342	4.974	9.41102	4.43702	1	0.29777	2.80232	1.32121
00000000_3.tif	predator	MT13113	tdc1	4.651	7.884	4.974	9.43828	4.46428	1	0.29777	2.81044	1.32933
00000000_3.tif	predator	MT13113	tdc1	5.651	8.224	4.974	8.38222	3.40822	1	0.29777	2.49597	1.01487
00000000_3.tif	predator	MT13113	tdc1	5.818	8.731	4.974	8.06406	3.09007	1	0.29777	2.40124	0.920129
00000000_3.tif	predator	MT13113	tdc1	5.845	8.863	4.974	8.00084	3.02685	1	0.29777	2.38241	0.901305
00000000_3.tif	predator	MT13113	tdc1	6.193	9.085	4.974	7.60605	2.63205	1	0.29777	2.26485	0.783746
00000000_3.tif	predator	MT13113	tdc1	6.623	9.273	4.974	7.14224	2.16824	1	0.29777	2.12674	0.645638
00000000_3.tif	predator	MT13113	tdc1	6.658	9.453	4.974	7.06506	2.09107	1	0.29777	2.10376	0.622657
00000000_3.tif	predator	MT13113	tdc1	7.151	10.057	4.974	6.46455	1.49055	1	0.29777	1.92495	0.443841
00000000_3.tif	predator	MT13113	tdc1	5.568	10.359	4.974	7.99948	3.02549	1	0.29777	2.38201	0.900899
00000000_3.tif	predator	MT13113	tdc1	5.436	10.88	4.974	8.10218	3.12819	1	0.29777	2.41259	0.93148
00000000_3.tif	predator	MT13113	tdc1	5.137	11.311	4.974	8.40251	3.42852	1	0.29777	2.50202	1.02091
00000000_3.tif	predator	MT13113	tdc1	4.964	12.095	4.974	8.6333	3.65931	1	0.29777	2.57074	1.08963
00000000_3.tif	predator	MT13113	tdc1	8.214	10.693	4.974	5.3352	0.361199	1	0.29777	1.58866	0.107554
00000000_3.tif	predator	MT13113	tdc1	4.845	13.696	4.974	9.07964	4.10564	1	0.29777	2.70364	1.22254
00000000_3.tif	predator	MT13113	tdc1	5.672	14.96	4.974	8.7744	3.80041	1	0.29777	2.61275	1.13165
00000000_3.tif	predator	MT13113	tdc1	5.818	15.023	4.974	8.67234	3.69835	1	0.29777	2.58236	1.10126
00000000_3.tif	predator	MT13113	tdc1	5.797	15.564	4.974	8.9502	3.97621	1	0.29777	2.6651	1.184
00000000_3.tif	predator	MT13113	tdc1	6.109	15.71	4.974	8.75834	3.78434	1	0.29777	2.60797	1.12686
00000000_3.tif	predator	MT13113	tdc1	6.325	16.113	4.974	8.8006	3.8266	1	0.29777	2.62055	1.13945
00000000_3.tif	predator	MT13113	tdc1	6.679	15.905	4.974	8.39137	3.41737	1	0.29777	2.4987	1.01759
00000000_3.tif	predator	MT13113	tdc1	8.054	14.481	4.974	6.45762	1.48363	1	0.29777	1.92289	0.44178
00000000_3.tif	predator	MT13113	tdc1	7.068	14.002	4.974	7.10235	2.12835	1	0.29777	2.11487	0.63376
00000000_3.tif	predator	MT13113	tdc1	6.644	13.592	4.974	7.33963	2.36564	1	0.29777	2.18552	0.704416
00000000_3.tif	predator	MT13113	tdc1	6.769	13.474	4.974	7.182	2.208	1	0.29777	2.13858	0.657477
00000000_3.tif	predator	MT13113	tdc1	11.644	19.418	4.974	8.56167	3.58767	1	0.29777	2.54941	1.0683
00000000_3.tif	predator	MT13113	tdc1	12.047	19.28	4.974	8.3459	3.37191	1	0.29777	2.48516	1.00405
00000000_3.tif	predator	MT13113	tdc1	11.276	18.807	4.974	8.06224	3.08824	1	0.29777	2.40069	0.919587
00000000_3.tif	predator	MT13113	tdc1	11.394	18.724	4.974	7.95	2.976	1	0.29777	2.36727	0.886165
00000000_3.tif	predator	MT13113	tdc1	8.825	16.464	4.974	7.16312	2.18913	1	0.29777	2.13296	0.651856
00000000_3.tif	predator	MT13113	tdc1	8.568	15.63	4.974	6.74484	1.77084	1	0.29777	2.00841	0.527304
00000000_3.tif	predator	MT13113	tdc1	11.832	16.498	4.974	5.69109	0.717095	1	0.29777	1.69464	0.213529
00000000_3.tif	predator	MT13113	tdc1	9.797	13.939	4.974	4.7141	-0.259894	0	0.29777	1.40372	-0.0773885
00000000_3.tif	predator	MT13113	tdc1	10.491	12.168	4.974	3.2376	-1.7364	0	0.29777	0.964059	-0.517048
00000000_3.tif	predator	MT13113	tdc1	9.866	11.856	4.974	3.75364	-1.22035	0	0.29777	1.11772	-0.363384
00000000_3.tif	predator	MT13113	tdc1	8.623	11.085	4.974	4.91303	-0.0609666	0	0.29777	1.46295	-0.018154
00000000_3.tif	predator	MT13113	tdc1	10.644	10.839	4.974	2.90105	-2.07294	0	0.29777	0.863846	-0.61726
00000000_3.tif	predator	MT13113	tdc1	13.63	9.214	4.974	1.85638	-3.11761	0	0.29777	0.552775	-0.928332
00000000_3.tif	predator	MT13113	tdc1	13.512	7.859	4.974	3.20909	-1.76491	0	0.29777	0.955571	-0.525536
00000000_3.tif	predator	MT13113	tdc1	13.179	7.106	4.974	3.97805	-0.995945	0	0.29777	1.18454	-0.296562
00000000_3.tif	predator	MT13113	tdc1	12.977	7.099	4.974	4.00817	-0.965824	0	0.29777	1.19351	-0.287593
00000000_3.tif	predator	MT13113	tdc1	13.075	6.175	4.974	4.91467	-0.0593271	0	0.29777	1.46344	-0.0176658
00000000_3.tif	predator	MT13113	tdc1	8.276	4.491	4.974	8.42167	3.44767	1	0.29777	2.50772	1.02661
00000000_3.tif	predator	MT13113	tdc1	11.457	2.79	4.974	8.53508	3.56108	1	0.29777	2.54149	1.06038
00000000_3.tif	predator	MT13113	tdc1	11.332	2.707	4.974	8.64661	3.67262	1	0.29777	2.5747	1.0936
00000000_3.tif	predator	MT13113	tdc1	17.644	1.953	4.974	9.99794	5.02395	1	0.29777	2.97709	1.49598
00000000_3.tif	predator	MT13113	tdc1	18.026	3.207	4.974	9.05292	4.07893	1	0.29777	2.69569	1.21458
00000000_3.tif	predator	MT13113	tdc1	14.686	4.276	4.974	6.88867	1.91467	1	0.29777	2.05124	0.570132
00000000_3.tif	predator	MT13113	tdc1	15.79	4.318	4.974	7.11639	2.14239	1	0.29777	2.11905	0.637941
00000000_3.tif	predator	MT13113	tdc1	15.582	5.047	4.974	6.35913	1.38514	1	0.29777	1.89356	0.412452
00000000_3.tif	predator	MT13113	tdc1	14.144	5.859	4.974	5.24436	0.270367	1	0.29777	1.56161	0.0805072
00000000_3.tif	predator	MT13113	tdc1	14.665	5.825	4.974	5.36318	0.389183	1	0.29777	1.59699	0.115887
00000000_3.tif	predator	MT13113	tdc1	14.804	5.783	4.974	5.43498	0.460988	1	0.29777	1.61838	0.137268
00000000_3.tif	predator	MT13113	tdc1	14.887	6.005	4.974	5.24015	0.266154	1	0.29777	1.56036	0.0792526
00000000_3.tif	predator	MT13113	tdc1	13.922	8.328	4.974	2.76706	-2.20694	0	0.29777	0.823946	-0.657161
00000000_3.tif	predator	MT13113	tdc1	14.589	11.547	4.974	1.15683	-3.81717	0	0.29777	0.344469	-1.13664
00000000_3.tif	predator	MT13113	tdc1	18.45	11.547	4.974	4.93729	-0.0367055	0	0.29777	1.47018	-0.0109298
00000000_3.tif	predator	MT13113	tdc1	18.748	13.165	4.974	5.61804	0.644042	1	0.29777	1.67288	0.191776
00000000_3.tif	predator	MT13113	tdc1	17.845	13.835	4.974	5.12091	0.146919	1	0.29777	1.52485	0.0437481
00000000_3.tif	predator	MT13113	tdc1	17.943	14.356	4.974	5.49842	0.524421	1	0.29777	1.63726	0.156157
00000000_3.tif	predator	MT13113	tdc1	16.811	13.599	4.974	4.13903	-0.834964	0	0.29777	1.23248	-0.248627
00000000_3.tif	predator	MT13113	tdc1	14.415	16.884	4.974	5.88205	0.908053	1	0.29777	1.7515	0.270391
00000000_3.tif	predator	MT13113	tdc1	14.526	16.71	4.974	5.7282	0.754203	1	0.29777	1.70569	0.224579
00000000_3.tif	predator	MT13113	tdc1	17.873	16.349	4.974	6.83363	1.85964	1	0.29777	2.03485	0.553744
00000000_3.tif	predator	MT13113	tdc1	15.651	19.547	4.974	8.7388	3.76481	1	0.29777	2.60215	1.12105
00000000_3.tif	predator	MT13113	tdc1	16.568	19.651	4.974	9.1028	4.1288	1	0.29777	2.71054	1.22943
00000000_3.tif	predator	MT13113	tdc1	17.123	19.776	4.974	9.41785	4.44385	1	0.29777	2.80435	1.32325
00000000_3.tif	predator	MT13113	tdc1	17.283	19.748	4.974	9.45423	4.48023	1	0.29777	2.81519	1.33408
00000000_3.tif	predator	MT13113	tdc1	17.505	20.137	4.974	9.89948	4.92548	1	0.29777	2.94777	1.46666
00000000_3.tif	predator	MT13113	tdc1	17.214	20.616	4.974	10.2319	5.25791	1	0.29777	3.04676	1.56565
00000000_3.tif	predator	MT13113	tdc1	19.467	18.908	4.974	9.83068	4.85669	1	0.29777	2.92728	1.44618
00000000_3.tif	predator	MT13113	tdc1	19.516	18.7	4.974	9.69576	4.72177	1	0.29777	2.88711	1.406
00000000_3.tif	predator	MT13113	tdc1	19.425	18.547	4.974	9.51923	4.54524	1	0.29777	2.83454	1.35343
00000000_3.tif	predator	MT13113	tdc1	20.696	18.422	4.974	10.2639	5.28987	1	0.29777	3.05627	1.57516
00000000_3.tif	predator	MT13113	tdc1	21.21	18.2	4.974	10.4764	5.50244	1	0.29777	3.11957	1.63846
00000000_3.tif	predator	MT13113	tdc1	22.113	15.207	4.974	9.52346	4.54946	1	0.29777	2.8358	1.35469
00000000_3.tif	predator	MT13113	tdc1	22.182	14.811	4.974	9.42143	4.44744	1	0.29777	2.80542	1.32431
00000000_3.tif	predator	MT13113	tdc1	20.03	14.901	4.974	7.54082	2.56682	1	0.29777	2.24543	0.764322
00000000_3.tif	predator	MT13113	tdc1	22.821	15.179	4.974	10.1544	5.18039	1	0.29777	3.02367	1.54256
00000000_3.tif	predator	MT13113	tdc1	22.96	15.158	4.974	10.2733	5.29926	1	0.29777	3.05907	1.57796
00000000_3.tif	predator	MT13113	tdc1	22.807	15.054	4.974	10.0916	5.11757	1	0.29777	3.00496	1.52386
00000000_3.tif	predator	MT13113	tdc1	22.793	13.005	4.974	9.45748	4.48349	1	0.29777	2.81616	1.33505
00000000_3.tif	predator	MT13113	tdc1	22.807	10.12	4.974	9.31934	4.34535	1	0.29777	2.77502	1.29391
00000000_3.tif	predator	MT13113	tdc1	22.627	9.988	4.974	9.15493	4.18093	1	0.29777	2.72606	1.24496
00000000_3.tif	predator	MT13113	tdc1	22.488	10.113	4.974	9.0028	4.0288	1	0.29777	2.68076	1.19966
00000000_3.tif	predator	MT13113	tdc1	23.043	9.509	4.974	9.63398	4.65998	1	0.29777	2.86871	1.3876
00000000_3.tif	predator	MT13113	tdc1	23.328	8.589	4.974	10.1009	5.12693	1	0.29777	3.00775	1.52665
00000000_3.tif	predator	MT13113	tdc1	23.488	8.54	4.974	10.2681	5.29407	1	0.29777	3.05752	1.57641
00000000_3.tif	predator	MT13113	tdc1	19.689	5.738	4.974	8.14053	3.16654	1	0.29777	2.42401	0.9429
00000000_3.tif	predator	MT13113	tdc1	19.661	5.495	4.974	8.28094	3.30694	1	0.29777	2.46582	0.984708
00000000_3.tif	predator	MT13113	tdc1	19.113	4.182	4.974	8.86115	3.88715	1	0.29777	2.63858	1.15748
00000000_3.tif	predator	MT13113	tdc1	20.814	4.776	4.974	9.62074	4.64674	1	0.29777	2.86477	1.38366
00000000_3.tif	predator	MT13113	tdc1	22.266	4.88	4.974	10.7007	5.72667	1	0.29777	3.18634	1.70523
00000000_3.tif	predator	MT13113	tdc1	24.37	8.675	4.974	11.0951	6.12114	1	0.29777	3.3038	1.82269
00000000_3.tif	predator	MT13113	tdc1	24.009	13.533	4.974	10.7592	5.78518	1	0.29777	3.20376	1.72265
0000000_10.tif	control	MT9455	tbh1	5.438	11.542	5.16136	8.71536	3.554	1	0.29777	2.59517	1.05827
0000000_10.tif	control	MT9455	tbh1	5.585	11.432	5.16136	8.56332	3.40196	1	0.29777	2.5499	1.013
0000000_10.tif	control	MT9455	tbh1	7.134	10.099	5.16136	7.07506	1.9137	1	0.29777	2.10674	0.569842
0000000_10.tif	control	MT9455	tbh1	7.425	10.168	5.16136	6.77737	1.61601	1	0.29777	2.0181	0.481199
0000000_10.tif	control	MT9455	tbh1	10.845	6.432	5.16136	5.6964	0.535033	1	0.29777	1.69622	0.159317
0000000_10.tif	control	MT9455	tbh1	10.964	7.134	5.16136	5.06443	-0.0969321	0	0.29777	1.50804	-0.0288635
0000000_10.tif	control	MT9455	tbh1	11.137	7.203	5.16136	4.90302	-0.25834	0	0.29777	1.45997	-0.0769258
0000000_10.tif	control	MT9455	tbh1	11.339	7.05	5.16136	4.90673	-0.254635	0	0.29777	1.46108	-0.0758225
0000000_10.tif	control	MT9455	tbh1	10.401	7.349	5.16136	5.28139	0.120023	1	0.29777	1.57264	0.0357392
0000000_10.tif	control	MT9455	tbh1	10.519	8.464	5.16136	4.46675	-0.694611	0	0.29777	1.33006	-0.206834
0000000_10.tif	control	MT9455	tbh1	11.012	8.165	5.16136	4.27507	-0.886295	0	0.29777	1.27299	-0.263912
0000000_10.tif	control	MT9455	tbh1	10.977	9.158	5.16136	3.70099	-1.46038	0	0.29777	1.10204	-0.434857
0000000_10.tif	control	MT9455	tbh1	11.13	9.394	5.16136	3.44992	-1.71144	0	0.29777	1.02728	-0.509615
0000000_10.tif	control	MT9455	tbh1	11.359	9.575	5.16136	3.16205	-1.99932	0	0.29777	0.941562	-0.595337
0000000_10.tif	control	MT9455	tbh1	10.818	9.582	5.16136	3.64422	-1.51714	0	0.29777	1.08514	-0.45176
0000000_10.tif	control	MT9455	tbh1	10.714	9.672	5.16136	3.70421	-1.45715	0	0.29777	1.103	-0.433897
0000000_10.tif	control	MT9455	tbh1	10.72	9.755	5.16136	3.66791	-1.49345	0	0.29777	1.09219	-0.444705
0000000_10.tif	control	MT9455	tbh1	10.783	9.832	5.16136	3.58171	-1.57965	0	0.29777	1.06653	-0.470372
0000000_10.tif	control	MT9455	tbh1	10.637	10.109	5.16136	3.63552	-1.52585	0	0.29777	1.08255	-0.454352
0000000_10.tif	control	MT9455	tbh1	10.151	10.72	5.16136	4.00603	-1.15533	0	0.29777	1.19288	-0.344024
0000000_10.tif	control	MT9455	tbh1	9.936	11.116	5.16136	4.20517	-0.956192	0	0.29777	1.25217	-0.284725
0000000_10.tif	control	MT9455	tbh1	9.977	11.318	5.16136	4.17091	-0.990453	0	0.29777	1.24197	-0.294927
0000000_10.tif	control	MT9455	tbh1	10.547	11.54	5.16136	3.62357	-1.53779	0	0.29777	1.07899	-0.457908
0000000_10.tif	control	MT9455	tbh1	10.887	11.477	5.16136	3.27837	-1.88299	0	0.29777	0.976201	-0.560699
0000000_10.tif	control	MT9455	tbh1	10.852	11.72	5.16136	3.35107	-1.81029	0	0.29777	0.997849	-0.53905
0000000_10.tif	control	MT9455	tbh1	11.29	12.179	5.16136	3.05621	-2.10516	0	0.29777	0.910047	-0.626852
0000000_10.tif	control	MT9455	tbh1	11.436	11.998	5.16136	2.85717	-2.30419	0	0.29777	0.85078	-0.686119
0000000_10.tif	control	MT9455	tbh1	11.262	10.943	5.16136	2.88216	-2.2792	0	0.29777	0.858222	-0.678677
0000000_10.tif	control	MT9455	tbh1	10.595	10.852	5.16136	3.55319	-1.60817	0	0.29777	1.05803	-0.478864
0000000_10.tif	control	MT9455	tbh1	8.748	11.991	5.16136	5.46974	0.308373	1	0.29777	1.62872	0.0918243
0000000_10.tif	control	MT9455	tbh1	9.658	12.387	5.16136	4.6702	-0.491163	0	0.29777	1.39065	-0.146254
0000000_10.tif	control	MT9455	tbh1	9.866	12.436	5.16136	4.48551	-0.675855	0	0.29777	1.33565	-0.201249
0000000_10.tif	control	MT9455	tbh1	9.866	13.2	5.16136	4.77268	-0.38868	0	0.29777	1.42116	-0.115737
0000000_10.tif	control	MT9455	tbh1	10.075	13.373	5.16136	4.66898	-0.492383	0	0.29777	1.39028	-0.146617
0000000_10.tif	control	MT9455	tbh1	10.186	13.297	5.16136	4.53497	-0.62639	0	0.29777	1.35038	-0.18652
0000000_10.tif	control	MT9455	tbh1	11.311	14.714	5.16136	4.60754	-0.553827	0	0.29777	1.37199	-0.164913
0000000_10.tif	control	MT9455	tbh1	10.95	15.276	5.16136	5.27311	0.111746	1	0.29777	1.57017	0.0332747
0000000_10.tif	control	MT9455	tbh1	11.061	15.686	5.16136	5.54257	0.381205	1	0.29777	1.65041	0.113511
0000000_10.tif	control	MT9455	tbh1	11.144	15.693	5.16136	5.50275	0.341384	1	0.29777	1.63855	0.101654
0000000_10.tif	control	MT9455	tbh1	10.026	15.755	5.16136	6.22957	1.06821	1	0.29777	1.85498	0.31808
0000000_10.tif	control	MT9455	tbh1	9.741	15.887	5.16136	6.51817	1.3568	1	0.29777	1.94091	0.404015
0000000_10.tif	control	MT9455	tbh1	9.554	15.686	5.16136	6.50186	1.3405	1	0.29777	1.93606	0.399161
0000000_10.tif	control	MT9455	tbh1	12.177	20.104	5.16136	9.23721	4.07584	1	0.29777	2.75056	1.21366
0000000_10.tif	control	MT9455	tbh1	11.526	18.849	5.16136	8.19919	3.03782	1	0.29777	2.44147	0.904573
0000000_10.tif	control	MT9455	tbh1	11.547	18.672	5.16136	8.02482	2.86345	1	0.29777	2.38955	0.85265
0000000_10.tif	control	MT9455	tbh1	12.526	19.385	5.16136	8.46253	3.30117	1	0.29777	2.51989	0.982989
0000000_10.tif	control	MT9455	tbh1	12.573	19.198	5.16136	8.27001	3.10864	1	0.29777	2.46256	0.925661
0000000_10.tif	control	MT9455	tbh1	12.927	19.161	5.16136	8.17366	3.01229	1	0.29777	2.43387	0.896971
0000000_10.tif	control	MT9455	tbh1	13	19.031	5.16136	8.03443	2.87307	1	0.29777	2.39241	0.855513
0000000_10.tif	control	MT9455	tbh1	13.578	17.885	5.16136	6.83024	1.66888	1	0.29777	2.03384	0.496942
0000000_10.tif	control	MT9455	tbh1	13.63	17.771	5.16136	6.71248	1.55112	1	0.29777	1.99877	0.461876
0000000_10.tif	control	MT9455	tbh1	11.552	16.443	5.16136	5.95702	0.795661	1	0.29777	1.77382	0.236924
0000000_10.tif	control	MT9455	tbh1	11.542	16.042	5.16136	5.60322	0.441859	1	0.29777	1.66847	0.131572
0000000_10.tif	control	MT9455	tbh1	11.896	16.281	5.16136	5.66668	0.505314	1	0.29777	1.68737	0.150467
0000000_10.tif	control	MT9455	tbh1	11.833	16.13	5.16136	5.55424	0.392875	1	0.29777	1.65389	0.116986
0000000_10.tif	control	MT9455	tbh1	11.917	16.036	5.16136	5.43396	0.272598	1	0.29777	1.61807	0.0811716
0000000_10.tif	control	MT9455	tbh1	11.792	15.63	5.16136	5.12235	-0.03901	0	0.29777	1.52528	-0.011616
0000000_10.tif	control	MT9455	tbh1	11.729	15.552	5.16136	5.08276	-0.0786063	0	0.29777	1.51349	-0.0234066
0000000_10.tif	control	MT9455	tbh1	12.021	15.281	5.16136	4.7074	-0.453964	0	0.29777	1.40172	-0.135177
0000000_10.tif	control	MT9455	tbh1	11.979	15.062	5.16136	4.53282	-0.628539	0	0.29777	1.34974	-0.18716
0000000_10.tif	control	MT9455	tbh1	11.599	14.969	5.16136	4.64776	-0.513606	0	0.29777	1.38396	-0.152937
0000000_10.tif	control	MT9455	tbh1	11.656	14.812	5.16136	4.48531	-0.676056	0	0.29777	1.33559	-0.201309
0000000_10.tif	control	MT9455	tbh1	12.161	14.729	5.16136	4.15334	-1.00803	0	0.29777	1.23674	-0.30016
0000000_10.tif	control	MT9455	tbh1	13.255	15.583	5.16136	4.5913	-0.570065	0	0.29777	1.36715	-0.169748
0000000_10.tif	control	MT9455	tbh1	13.849	14.896	5.16136	3.82915	-1.33221	0	0.29777	1.14021	-0.396693
0000000_10.tif	control	MT9455	tbh1	12.13	13.26	5.16136	2.96736	-2.194	0	0.29777	0.883592	-0.653307
0000000_10.tif	control	MT9455	tbh1	11.802	12.745	5.16136	2.87225	-2.28912	0	0.29777	0.855269	-0.68163
0000000_10.tif	control	MT9455	tbh1	12.214	12.089	5.16136	2.17611	-2.98525	0	0.29777	0.64798	-0.888919
0000000_10.tif	control	MT9455	tbh1	11.646	10.833	5.16136	2.507	-2.65436	0	0.29777	0.746509	-0.79039
0000000_10.tif	control	MT9455	tbh1	12.49	10.677	5.16136	1.699	-3.46236	0	0.29777	0.505911	-1.03099
0000000_10.tif	control	MT9455	tbh1	12.656	10.594	5.16136	1.56188	-3.59948	0	0.29777	0.465082	-1.07182
0000000_10.tif	control	MT9455	tbh1	13.26	10.911	5.16136	0.896688	-4.26468	0	0.29777	0.267007	-1.26989
0000000_10.tif	control	MT9455	tbh1	13.417	10.875	5.16136	0.751921	-4.40944	0	0.29777	0.223899	-1.313
0000000_10.tif	control	MT9455	tbh1	13.339	11.635	5.16136	0.976449	-4.18491	0	0.29777	0.290757	-1.24614
0000000_10.tif	control	MT9455	tbh1	13.443	11.74	5.16136	0.962002	-4.19936	0	0.29777	0.286455	-1.25044
0000000_10.tif	control	MT9455	tbh1	13.552	11.729	5.16136	0.877908	-4.28346	0	0.29777	0.261415	-1.27548
0000000_10.tif	control	MT9455	tbh1	13.37	11.99	5.16136	1.19423	-3.96713	0	0.29777	0.355606	-1.18129
0000000_10.tif	control	MT9455	tbh1	13.26	12.047	5.16136	1.30963	-3.85174	0	0.29777	0.389968	-1.14693
0000000_10.tif	control	MT9455	tbh1	11.906	9.411	5.16136	2.78821	-2.37315	0	0.29777	0.830245	-0.706654
0000000_10.tif	control	MT9455	tbh1	11.786	9.312	5.16136	2.9436	-2.21776	0	0.29777	0.876516	-0.660383
0000000_10.tif	control	MT9455	tbh1	12.073	9.26	5.16136	2.7535	-2.40787	0	0.29777	0.819909	-0.71699
0000000_10.tif	control	MT9455	tbh1	12.547	9.391	5.16136	2.32095	-2.84041	0	0.29777	0.691109	-0.84579
0000000_10.tif	control	MT9455	tbh1	11.469	8.781	5.16136	3.52361	-1.63776	0	0.29777	1.04922	-0.487675
0000000_10.tif	control	MT9455	tbh1	11.589	8.755	5.16136	3.45095	-1.71042	0	0.29777	1.02759	-0.509311
0000000_10.tif	control	MT9455	tbh1	11.734	8.781	5.16136	3.32714	-1.83422	0	0.29777	0.990722	-0.546177
0000000_10.tif	control	MT9455	tbh1	11.932	9.057	5.16136	2.99401	-2.16735	0	0.29777	0.891528	-0.645372
0000000_10.tif	control	MT9455	tbh1	12.042	8.891	5.16136	3.0313	-2.13007	0	0.29777	0.90263	-0.634269
0000000_10.tif	control	MT9455	tbh1	11.547	8.521	5.16136	3.6424	-1.51896	0	0.29777	1.0846	-0.452301
0000000_10.tif	control	MT9455	tbh1	11.573	8.417	5.16136	3.69805	-1.46332	0	0.29777	1.10117	-0.435732
0000000_10.tif	control	MT9455	tbh1	13.802	8.922	5.16136	2.18249	-2.97887	0	0.29777	0.64988	-0.88702
0000000_10.tif	control	MT9455	tbh1	13.786	8.833	5.16136	2.27289	-2.88847	0	0.29777	0.6768	-0.860099
0000000_10.tif	control	MT9455	tbh1	13.297	8.125	5.16136	3.07124	-2.09012	0	0.29777	0.914525	-0.622375
0000000_10.tif	control	MT9455	tbh1	13.589	7.938	5.16136	3.18815	-1.97321	0	0.29777	0.949336	-0.587564
0000000_10.tif	control	MT9455	tbh1	11.953	7.359	5.16136	4.31489	-0.84647	0	0.29777	1.28485	-0.252053
0000000_10.tif	control	MT9455	tbh1	13.552	7.578	5.16136	3.54921	-1.61215	0	0.29777	1.05685	-0.48005
0000000_10.tif	control	MT9455	tbh1	14.042	7.552	5.16136	3.52739	-1.63397	0	0.29777	1.05035	-0.486548
0000000_10.tif	control	MT9455	tbh1	13.911	7.385	5.16136	3.70016	-1.46121	0	0.29777	1.1018	-0.435104
0000000_10.tif	control	MT9455	tbh1	13.448	6.927	5.16136	4.20845	-0.952914	0	0.29777	1.25315	-0.283749
0000000_10.tif	control	MT9455	tbh1	13.521	6.766	5.16136	4.35635	-0.805018	0	0.29777	1.29719	-0.23971
0000000_10.tif	control	MT9455	tbh1	13.615	6.771	5.16136	4.339	-0.822363	0	0.29777	1.29202	-0.244875
0000000_10.tif	control	MT9455	tbh1	13.953	6.615	5.16136	4.46696	-0.694406	0	0.29777	1.33013	-0.206773
0000000_10.tif	control	MT9455	tbh1	15.484	5.885	5.16136	5.36385	0.202488	1	0.29777	1.59719	0.0602947
0000000_10.tif	control	MT9455	tbh1	15.359	6.005	5.16136	5.21717	0.0558056	1	0.29777	1.55352	0.0166172
0000000_10.tif	control	MT9455	tbh1	15.156	6.062	5.16136	5.11766	-0.0436998	0	0.29777	1.52389	-0.0130125
0000000_10.tif	control	MT9455	tbh1	15.26	6.109	5.16136	5.09344	-0.0679243	0	0.29777	1.51667	-0.0202258
0000000_10.tif	control	MT9455	tbh1	15.25	6.234	5.16136	4.96933	-0.192036	0	0.29777	1.47972	-0.0571825
0000000_10.tif	control	MT9455	tbh1	14.266	6.844	5.16136	4.23584	-0.925519	0	0.29777	1.26131	-0.275592
0000000_10.tif	control	MT9455	tbh1	14.292	6.932	5.16136	4.14875	-1.01261	0	0.29777	1.23537	-0.301526
0000000_10.tif	control	MT9455	tbh1	14.271	7.052	5.16136	4.0281	-1.13327	0	0.29777	1.19945	-0.337452
0000000_10.tif	control	MT9455	tbh1	14.167	7.328	5.16136	3.75009	-1.41127	0	0.29777	1.11666	-0.420235
0000000_10.tif	control	MT9455	tbh1	14.302	7.234	5.16136	3.84737	-1.31399	0	0.29777	1.14563	-0.391268
0000000_10.tif	control	MT9455	tbh1	14.406	7.255	5.16136	3.83217	-1.32919	0	0.29777	1.14111	-0.395793
0000000_10.tif	control	MT9455	tbh1	14.432	7.104	5.16136	3.98464	-1.17672	0	0.29777	1.18651	-0.350393
0000000_10.tif	control	MT9455	tbh1	14.521	6.906	5.16136	4.18927	-0.972093	0	0.29777	1.24744	-0.28946
0000000_10.tif	control	MT9455	tbh1	14.583	6.75	5.16136	4.35051	-0.810852	0	0.29777	1.29545	-0.241447
0000000_10.tif	control	MT9455	tbh1	14.724	6.672	5.16136	4.4444	-0.71696	0	0.29777	1.32341	-0.213489
0000000_10.tif	control	MT9455	tbh1	15.141	6.693	5.16136	4.49758	-0.663784	0	0.29777	1.33924	-0.197655
0000000_10.tif	control	MT9455	tbh1	15.562	6.88	5.16136	4.43198	-0.729384	0	0.29777	1.31971	-0.217189
0000000_10.tif	control	MT9455	tbh1	15.703	6.745	5.16136	4.60595	-0.555418	0	0.29777	1.37151	-0.165387
0000000_10.tif	control	MT9455	tbh1	15.99	6.724	5.16136	4.73034	-0.431023	0	0.29777	1.40855	-0.128346
0000000_10.tif	control	MT9455	tbh1	15.891	7.188	5.16136	4.26551	-0.895851	0	0.29777	1.27014	-0.266757
0000000_10.tif	control	MT9455	tbh1	16.125	7.458	5.16136	4.12803	-1.03333	0	0.29777	1.2292	-0.307695
0000000_10.tif	control	MT9455	tbh1	15.839	7.651	5.16136	3.8246	-1.33677	0	0.29777	1.13885	-0.398049
0000000_10.tif	control	MT9455	tbh1	15.766	7.661	5.16136	3.78372	-1.37765	0	0.29777	1.12668	-0.410222
0000000_10.tif	control	MT9455	tbh1	15.448	7.38	5.16136	3.92217	-1.23919	0	0.29777	1.16791	-0.368993
0000000_10.tif	control	MT9455	tbh1	15.344	7.375	5.16136	3.89351	-1.26785	0	0.29777	1.15937	-0.377529
0000000_10.tif	control	MT9455	tbh1	15.354	7.26	5.16136	4.00606	-1.15531	0	0.29777	1.19288	-0.344016
0000000_10.tif	control	MT9455	tbh1	15.198	7.323	5.16136	3.90093	-1.26043	0	0.29777	1.16158	-0.375319
0000000_10.tif	control	MT9455	tbh1	15.161	7.411	5.16136	3.80622	-1.35515	0	0.29777	1.13338	-0.403522
0000000_10.tif	control	MT9455	tbh1	14.828	7.302	5.16136	3.83799	-1.32338	0	0.29777	1.14284	-0.394062
0000000_10.tif	control	MT9455	tbh1	14.802	7.385	5.16136	3.75169	-1.40967	0	0.29777	1.11714	-0.419759
0000000_10.tif	control	MT9455	tbh1	14.969	8.13	5.16136	3.06207	-2.09929	0	0.29777	0.911793	-0.625106
0000000_10.tif	control	MT9455	tbh1	14.594	8.615	5.16136	2.50431	-2.65705	0	0.29777	0.745709	-0.79119
0000000_10.tif	control	MT9455	tbh1	14.453	9.438	5.16136	1.66941	-3.49195	0	0.29777	0.497101	-1.0398
0000000_10.tif	control	MT9455	tbh1	15.151	9.672	5.16136	1.73117	-3.4302	0	0.29777	0.515489	-1.02141
0000000_10.tif	control	MT9455	tbh1	15.344	9.609	5.16136	1.89873	-3.26263	0	0.29777	0.565384	-0.971515
0000000_10.tif	control	MT9455	tbh1	15.781	9.693	5.16136	2.14658	-3.01478	0	0.29777	0.639188	-0.897711
0000000_10.tif	control	MT9455	tbh1	15.161	10.125	5.16136	1.39593	-3.76544	0	0.29777	0.415665	-1.12123
0000000_10.tif	control	MT9455	tbh1	15.094	10.219	5.16136	1.283	-3.87836	0	0.29777	0.382039	-1.15486
0000000_10.tif	control	MT9455	tbh1	15.365	10.938	5.16136	1.23198	-3.92938	0	0.29777	0.366847	-1.17005
0000000_10.tif	control	MT9455	tbh1	15.542	10.948	5.16136	1.40702	-3.75434	0	0.29777	0.418968	-1.11793
0000000_10.tif	control	MT9455	tbh1	15.573	12.057	5.16136	1.73467	-3.4267	0	0.29777	0.516531	-1.02037
0000000_10.tif	control	MT9455	tbh1	15.906	12.193	5.16136	2.08769	-3.07367	0	0.29777	0.621651	-0.915248
0000000_10.tif	control	MT9455	tbh1	14.63	12.583	5.16136	1.58245	-3.57891	0	0.29777	0.471206	-1.06569
0000000_10.tif	control	MT9455	tbh1	14.651	14.302	5.16136	3.26409	-1.89727	0	0.29777	0.971948	-0.564951
0000000_10.tif	control	MT9455	tbh1	14.484	14.859	5.16136	3.79653	-1.36484	0	0.29777	1.13049	-0.406408
0000000_10.tif	control	MT9455	tbh1	15.057	14.552	5.16136	3.59273	-1.56863	0	0.29777	1.06981	-0.467091
0000000_10.tif	control	MT9455	tbh1	15.802	15.125	5.16136	4.3746	-0.786763	0	0.29777	1.30262	-0.234274
0000000_10.tif	control	MT9455	tbh1	14.344	15.802	5.16136	4.72836	-0.433004	0	0.29777	1.40796	-0.128936
0000000_10.tif	control	MT9455	tbh1	14.5	15.885	5.16136	4.82039	-0.340977	0	0.29777	1.43537	-0.101533
0000000_10.tif	control	MT9455	tbh1	14.714	15.839	5.16136	4.79536	-0.366006	0	0.29777	1.42791	-0.108986
0000000_10.tif	control	MT9455	tbh1	15.578	16.094	5.16136	5.21778	0.0564162	1	0.29777	1.5537	0.0167991
0000000_10.tif	control	MT9455	tbh1	15.88	16.271	5.16136	5.47644	0.315074	1	0.29777	1.63072	0.0938197
0000000_10.tif	control	MT9455	tbh1	14.599	18.604	5.16136	7.53992	2.37856	1	0.29777	2.24516	0.708264
0000000_10.tif	control	MT9455	tbh1	14.703	18.552	5.16136	7.4951	2.33374	1	0.29777	2.23182	0.694917
0000000_10.tif	control	MT9455	tbh1	15.474	18.37	5.16136	7.41284	2.25147	1	0.29777	2.20732	0.670421
0000000_10.tif	control	MT9455	tbh1	16.057	17.198	5.16136	6.41291	1.25155	1	0.29777	1.90957	0.372674
0000000_10.tif	control	MT9455	tbh1	14.797	19.865	5.16136	8.81145	3.65009	1	0.29777	2.62379	1.08689
0000000_10.tif	control	MT9455	tbh1	16.245	20.427	5.16136	9.58283	4.42147	1	0.29777	2.85348	1.31658
0000000_10.tif	control	MT9455	tbh1	17.672	20.109	5.16136	9.69675	4.53538	1	0.29777	2.8874	1.3505
0000000_10.tif	control	MT9455	tbh1	17.688	19.891	5.16136	9.50001	4.33865	1	0.29777	2.82882	1.29192
0000000_10.tif	control	MT9455	tbh1	17.797	19.63	5.16136	9.3007	4.13934	1	0.29777	2.76947	1.23257
0000000_10.tif	control	MT9455	tbh1	18.208	19.193	5.16136	9.0771	3.91573	1	0.29777	2.70289	1.16599
0000000_10.tif	control	MT9455	tbh1	17.255	18.385	5.16136	7.94287	2.78151	1	0.29777	2.36515	0.82825
0000000_10.tif	control	MT9455	tbh1	17.177	18.203	5.16136	7.74486	2.5835	1	0.29777	2.30619	0.769289
0000000_10.tif	control	MT9455	tbh1	16.354	17.682	5.16136	6.96493	1.80356	1	0.29777	2.07395	0.537047
0000000_10.tif	control	MT9455	tbh1	16.234	17.125	5.16136	6.39897	1.23761	1	0.29777	1.90542	0.368523
0000000_10.tif	control	MT9455	tbh1	16.255	15.703	5.16136	5.08524	-0.0761279	0	0.29777	1.51423	-0.0226686
0000000_10.tif	control	MT9455	tbh1	16.328	15.521	5.16136	4.95209	-0.209271	0	0.29777	1.47458	-0.0623147
0000000_10.tif	control	MT9455	tbh1	16.422	15.557	5.16136	5.02637	-0.134993	0	0.29777	1.4967	-0.0401968
0000000_10.tif	control	MT9455	tbh1	16.448	15.344	5.16136	4.84985	-0.311518	0	0.29777	1.44414	-0.0927606
0000000_10.tif	control	MT9455	tbh1	16.193	15.177	5.16136	4.58394	-0.577424	0	0.29777	1.36496	-0.171939
0000000_10.tif	control	MT9455	tbh1	17	14.26	5.16136	4.27773	-0.88363	0	0.29777	1.27378	-0.263118
0000000_10.tif	control	MT9455	tbh1	17.021	14.161	5.16136	4.21892	-0.942443	0	0.29777	1.25627	-0.280631
0000000_10.tif	control	MT9455	tbh1	17.651	14.115	5.16136	4.64149	-0.519869	0	0.29777	1.3821	-0.154801
0000000_10.tif	control	MT9455	tbh1	16.203	12.677	5.16136	2.60934	-2.55203	0	0.29777	0.776983	-0.759917
0000000_10.tif	control	MT9455	tbh1	16.151	12.5	5.16136	2.46215	-2.69921	0	0.29777	0.733154	-0.803745
0000000_10.tif	control	MT9455	tbh1	18.234	12.156	5.16136	4.23258	-0.928784	0	0.29777	1.26034	-0.276564
0000000_10.tif	control	MT9455	tbh1	17.417	11.516	5.16136	3.30515	-1.85621	0	0.29777	0.984175	-0.552725
0000000_10.tif	control	MT9455	tbh1	17.271	10.958	5.16136	3.1323	-2.02906	0	0.29777	0.932705	-0.604194
0000000_10.tif	control	MT9455	tbh1	16.641	10.349	5.16136	2.60412	-2.55724	0	0.29777	0.775429	-0.76147
0000000_10.tif	control	MT9455	tbh1	16.714	10.349	5.16136	2.67428	-2.48708	0	0.29777	0.79632	-0.740579
0000000_10.tif	control	MT9455	tbh1	17.786	10.818	5.16136	3.65426	-1.5071	0	0.29777	1.08813	-0.44877
0000000_10.tif	control	MT9455	tbh1	17.74	10.688	5.16136	3.62007	-1.54129	0	0.29777	1.07795	-0.458951
0000000_10.tif	control	MT9455	tbh1	17.906	9.797	5.16136	3.97696	-1.18441	0	0.29777	1.18422	-0.352681
0000000_10.tif	control	MT9455	tbh1	17.286	9.479	5.16136	3.52815	-1.63322	0	0.29777	1.05058	-0.486323
0000000_10.tif	control	MT9455	tbh1	17.542	8.724	5.16136	4.1362	-1.02517	0	0.29777	1.23164	-0.305264
0000000_10.tif	control	MT9455	tbh1	17.615	8.714	5.16136	4.20204	-0.95932	0	0.29777	1.25124	-0.285657
0000000_10.tif	control	MT9455	tbh1	17.984	8.411	5.16136	4.67777	-0.483593	0	0.29777	1.3929	-0.143999
0000000_10.tif	control	MT9455	tbh1	16.875	8.062	5.16136	4.07075	-1.09061	0	0.29777	1.21215	-0.324752
0000000_10.tif	control	MT9455	tbh1	17.385	8.297	5.16136	4.27288	-0.888484	0	0.29777	1.27234	-0.264564
0000000_10.tif	control	MT9455	tbh1	16.323	7.948	5.16136	3.8155	-1.34587	0	0.29777	1.13614	-0.400758
0000000_10.tif	control	MT9455	tbh1	16.271	7.63	5.16136	4.05285	-1.10851	0	0.29777	1.20682	-0.330082
0000000_10.tif	control	MT9455	tbh1	16.224	7.25	5.16136	4.35804	-0.803328	0	0.29777	1.29769	-0.239207
0000000_10.tif	control	MT9455	tbh1	16.854	7.807	5.16136	4.24968	-0.91168	0	0.29777	1.26543	-0.271471
0000000_10.tif	control	MT9455	tbh1	17.38	7.865	5.16136	4.56229	-0.599073	0	0.29777	1.35851	-0.178386
0000000_10.tif	control	MT9455	tbh1	17.276	7.797	5.16136	4.53797	-0.623392	0	0.29777	1.35127	-0.185627
0000000_10.tif	control	MT9455	tbh1	17.323	7.557	5.16136	4.74579	-0.415569	0	0.29777	1.41316	-0.123744
0000000_10.tif	control	MT9455	tbh1	16.406	6.688	5.16136	4.93987	-0.221493	0	0.29777	1.47095	-0.0659538
0000000_10.tif	control	MT9455	tbh1	18.505	8.328	5.16136	5.1582	-0.00316648	0	0.29777	1.53596	-0.000942883
0000000_10.tif	control	MT9455	tbh1	19.052	8.172	5.16136	5.70638	0.545015	1	0.29777	1.69919	0.162289
0000000_10.tif	control	MT9455	tbh1	18.766	10.375	5.16136	4.67812	-0.483241	0	0.29777	1.393	-0.143895
0000000_10.tif	control	MT9455	tbh1	18.464	10.698	5.16136	4.33967	-0.821694	0	0.29777	1.29222	-0.244676
0000000_10.tif	control	MT9455	tbh1	18.875	10.781	5.16136	4.74331	-0.418056	0	0.29777	1.41241	-0.124485
0000000_10.tif	control	MT9455	tbh1	18.828	11.609	5.16136	4.71698	-0.44438	0	0.29777	1.40458	-0.132323
0000000_10.tif	control	MT9455	tbh1	18.859	11.839	5.16136	4.77898	-0.382384	0	0.29777	1.42304	-0.113862
0000000_10.tif	control	MT9455	tbh1	18.88	12.042	5.16136	4.83605	-0.32531	0	0.29777	1.44003	-0.0968674
0000000_10.tif	control	MT9455	tbh1	18.865	12.255	5.16136	4.86842	-0.292944	0	0.29777	1.44967	-0.08723
0000000_10.tif	control	MT9455	tbh1	18.849	12.479	5.16136	4.91203	-0.249331	0	0.29777	1.46266	-0.0742432
0000000_10.tif	control	MT9455	tbh1	18.734	12.917	5.16136	4.94748	-0.213882	0	0.29777	1.47321	-0.0636877
0000000_10.tif	control	MT9455	tbh1	18.661	13.224	5.16136	5.00357	-0.157793	0	0.29777	1.48991	-0.0469861
0000000_10.tif	control	MT9455	tbh1	18.531	13.542	5.16136	5.03422	-0.127141	0	0.29777	1.49904	-0.0378588
0000000_10.tif	control	MT9455	tbh1	18.417	13.573	5.16136	4.95068	-0.210687	0	0.29777	1.47416	-0.0627362
0000000_10.tif	control	MT9455	tbh1	19.031	13.901	5.16136	5.64636	0.485001	1	0.29777	1.68132	0.144419
0000000_10.tif	control	MT9455	tbh1	19.167	13.964	5.16136	5.79566	0.634296	1	0.29777	1.72577	0.188874
0000000_10.tif	control	MT9455	tbh1	19.698	15.052	5.16136	6.83176	1.6704	1	0.29777	2.03429	0.497394
0000000_10.tif	control	MT9455	tbh1	18.615	19.005	5.16136	9.10242	3.94105	1	0.29777	2.71043	1.17353
0000000_10.tif	control	MT9455	tbh1	20.585	13.53	5.16136	6.89474	1.73338	1	0.29777	2.05305	0.516148
0000000_10.tif	control	MT9455	tbh1	20.759	13.564	5.16136	7.06952	1.90816	1	0.29777	2.10509	0.568192
00000001_1.tif	control	MT13113	tdc1	8.74	6.156	5.0887	6.74935	1.66065	1	0.29777	2.00975	0.494493
00000001_1.tif	control	MT13113	tdc1	8.661	7.505	5.0887	6.05286	0.964163	1	0.29777	1.80236	0.287099
00000001_1.tif	control	MT13113	tdc1	10.323	7.417	5.0887	4.72584	-0.362855	0	0.29777	1.40721	-0.108047
00000001_1.tif	control	MT13113	tdc1	10.719	7.625	5.0887	4.28951	-0.799188	0	0.29777	1.27729	-0.237974
00000001_1.tif	control	MT13113	tdc1	10.911	7.583	5.0887	4.17533	-0.913368	0	0.29777	1.24329	-0.271974
00000001_1.tif	control	MT13113	tdc1	10.964	7.474	5.0887	4.21297	-0.87573	0	0.29777	1.25449	-0.260766
00000001_1.tif	control	MT13113	tdc1	10.964	7.797	5.0887	3.99192	-1.09677	0	0.29777	1.18867	-0.326587
00000001_1.tif	control	MT13113	tdc1	11.047	7.979	5.0887	3.81	-1.27869	0	0.29777	1.1345	-0.380756
00000001_1.tif	control	MT13113	tdc1	10.839	8.057	5.0887	3.92301	-1.16569	0	0.29777	1.16815	-0.347107
00000001_1.tif	control	MT13113	tdc1	10.745	8.151	5.0887	3.94265	-1.14604	0	0.29777	1.174	-0.341257
00000001_1.tif	control	MT13113	tdc1	10.167	7.859	5.0887	4.58376	-0.504936	0	0.29777	1.36491	-0.150355
00000001_1.tif	control	MT13113	tdc1	11.417	6.807	5.0887	4.43303	-0.655662	0	0.29777	1.32002	-0.195236
00000001_1.tif	control	MT13113	tdc1	12.179	15.703	5.0887	5.5511	0.462401	1	0.29777	1.65295	0.137689
00000001_1.tif	control	MT13113	tdc1	11.125	15.401	5.0887	5.70783	0.619136	1	0.29777	1.69962	0.18436
00000001_1.tif	control	MT13113	tdc1	12.245	15.344	5.0887	5.19009	0.101397	1	0.29777	1.54545	0.030193
00000001_1.tif	control	MT13113	tdc1	12.203	15.115	5.0887	4.989	-0.0996998	0	0.29777	1.48557	-0.0296876
00000001_1.tif	control	MT13113	tdc1	12.401	15.188	5.0887	4.99237	-0.096329	0	0.29777	1.48658	-0.0286839
00000001_1.tif	control	MT13113	tdc1	12.589	14.802	5.0887	4.56743	-0.52127	0	0.29777	1.36004	-0.155219
00000001_1.tif	control	MT13113	tdc1	12.609	14.672	5.0887	4.43743	-0.651267	0	0.29777	1.32133	-0.193928
00000001_1.tif	control	MT13113	tdc1	12.927	14.682	5.0887	4.3614	-0.727298	0	0.29777	1.29869	-0.216567
00000001_1.tif	control	MT13113	tdc1	13.094	14.703	5.0887	4.34574	-0.742953	0	0.29777	1.29403	-0.221229
00000001_1.tif	control	MT13113	tdc1	13.151	15.01	5.0887	4.63688	-0.451812	0	0.29777	1.38072	-0.134536
00000001_1.tif	control	MT13113	tdc1	10.344	13.688	5.0887	4.85334	-0.235356	0	0.29777	1.44518	-0.0700821
00000001_1.tif	control	MT13113	tdc1	11.995	14.37	5.0887	4.38806	-0.700634	0	0.29777	1.30663	-0.208628
00000001_1.tif	control	MT13113	tdc1	12.172	14.13	5.0887	4.09462	-0.994074	0	0.29777	1.21926	-0.296005
00000001_1.tif	control	MT13113	tdc1	12.557	14.016	5.0887	3.83603	-1.25266	0	0.29777	1.14226	-0.373006
00000001_1.tif	control	MT13113	tdc1	12.781	13.812	5.0887	3.56704	-1.52166	0	0.29777	1.06216	-0.453105
00000001_1.tif	control	MT13113	tdc1	11.432	13.562	5.0887	4.01044	-1.07826	0	0.29777	1.19419	-0.321073
00000001_1.tif	control	MT13113	tdc1	11.302	13.458	5.0887	4.01473	-1.07397	0	0.29777	1.19547	-0.319796
00000001_1.tif	control	MT13113	tdc1	11.328	13.271	5.0887	3.85852	-1.23017	0	0.29777	1.14895	-0.366308
00000001_1.tif	control	MT13113	tdc1	10.708	12.818	5.0887	4.02127	-1.06742	0	0.29777	1.19741	-0.317846
00000001_1.tif	control	MT13113	tdc1	10.87	12.896	5.0887	3.93981	-1.14889	0	0.29777	1.17316	-0.342104
00000001_1.tif	control	MT13113	tdc1	9.724	12.323	5.0887	4.62805	-0.460647	0	0.29777	1.37809	-0.137167
00000001_1.tif	control	MT13113	tdc1	11.797	13.464	5.0887	3.71144	-1.37726	0	0.29777	1.10516	-0.410106
00000001_1.tif	control	MT13113	tdc1	11.604	13.396	5.0887	3.77333	-1.31537	0	0.29777	1.12358	-0.391677
00000001_1.tif	control	MT13113	tdc1	11.755	13.26	5.0887	3.57305	-1.51565	0	0.29777	1.06395	-0.451314
00000001_1.tif	control	MT13113	tdc1	11.542	12.839	5.0887	3.39908	-1.68962	0	0.29777	1.01214	-0.503117
00000001_1.tif	control	MT13113	tdc1	11.24	12.484	5.0887	3.395	-1.69369	0	0.29777	1.01093	-0.504331
00000001_1.tif	control	MT13113	tdc1	12.083	13.266	5.0887	3.38618	-1.70251	0	0.29777	1.0083	-0.506958
00000001_1.tif	control	MT13113	tdc1	12.141	13.161	5.0887	3.26663	-1.82207	0	0.29777	0.972704	-0.542557
00000001_1.tif	control	MT13113	tdc1	12.167	13.031	5.0887	3.14445	-1.94425	0	0.29777	0.936322	-0.578939
00000001_1.tif	control	MT13113	tdc1	12.49	12.672	5.0887	2.66624	-2.42246	0	0.29777	0.793925	-0.721336
00000001_1.tif	control	MT13113	tdc1	13.26	11.958	5.0887	1.66598	-3.42272	0	0.29777	0.496077	-1.01918
00000001_1.tif	control	MT13113	tdc1	13.073	12.036	5.0887	1.8199	-3.26879	0	0.29777	0.541913	-0.973348
00000001_1.tif	control	MT13113	tdc1	12.901	12.031	5.0887	1.90485	-3.18385	0	0.29777	0.567207	-0.948054
00000001_1.tif	control	MT13113	tdc1	12.755	11.979	5.0887	1.94795	-3.14075	0	0.29777	0.58004	-0.935221
00000001_1.tif	control	MT13113	tdc1	11.562	12.047	5.0887	2.87918	-2.20951	0	0.29777	0.857334	-0.657927
00000001_1.tif	control	MT13113	tdc1	11.87	11.839	5.0887	2.50753	-2.58117	0	0.29777	0.746667	-0.768594
00000001_1.tif	control	MT13113	tdc1	11.578	11.641	5.0887	2.66004	-2.42865	0	0.29777	0.792081	-0.72318
00000001_1.tif	control	MT13113	tdc1	11.276	11.557	5.0887	2.89954	-2.18916	0	0.29777	0.863396	-0.651865
00000001_1.tif	control	MT13113	tdc1	10.646	11.594	5.0887	3.50158	-1.58712	0	0.29777	1.04266	-0.472596
00000001_1.tif	control	MT13113	tdc1	8.248	12.241	5.0887	5.98162	0.892928	1	0.29777	1.78115	0.265887
00000001_1.tif	control	MT13113	tdc1	8.929	12.352	5.0887	5.37446	0.285767	1	0.29777	1.60035	0.0850929
00000001_1.tif	control	MT13113	tdc1	8.802	12.057	5.0887	5.39794	0.309248	1	0.29777	1.60735	0.0920847
00000001_1.tif	control	MT13113	tdc1	9.469	12.094	5.0887	4.77829	-0.310406	0	0.29777	1.42283	-0.0924296
00000001_1.tif	control	MT13113	tdc1	9.594	12.177	5.0887	4.69123	-0.397466	0	0.29777	1.39691	-0.118354
00000001_1.tif	control	MT13113	tdc1	9.656	12.073	5.0887	4.59577	-0.492925	0	0.29777	1.36848	-0.146778
00000001_1.tif	control	MT13113	tdc1	8.865	11.51	5.0887	5.19868	0.10998	1	0.29777	1.54801	0.0327488
00000001_1.tif	control	MT13113	tdc1	8.979	11.411	5.0887	5.06732	-0.0213792	0	0.29777	1.50889	-0.00636609
00000001_1.tif	control	MT13113	tdc1	8.974	11.255	5.0887	5.04478	-0.0439181	0	0.29777	1.50218	-0.0130775
00000001_1.tif	control	MT13113	tdc1	9.12	11.365	5.0887	4.92016	-0.168536	0	0.29777	1.46508	-0.050185
00000001_1.tif	control	MT13113	tdc1	8.896	10.844	5.0887	5.07287	-0.0158221	0	0.29777	1.51055	-0.00471135
00000001_1.tif	control	MT13113	tdc1	8.911	10.724	5.0887	5.04982	-0.0388718	0	0.29777	1.50369	-0.0115749
00000001_1.tif	control	MT13113	tdc1	8.583	10.755	5.0887	5.37906	0.29036	1	0.29777	1.60172	0.0864605
00000001_1.tif	control	MT13113	tdc1	8.24	10.109	5.0887	5.72276	0.634059	1	0.29777	1.70406	0.188804
00000001_1.tif	control	MT13113	tdc1	8.797	10.094	5.0887	5.1678	0.079102	1	0.29777	1.53882	0.0235542
00000001_1.tif	control	MT13113	tdc1	9.302	11.208	5.0887	4.71349	-0.375202	0	0.29777	1.40354	-0.111724
00000001_1.tif	control	MT13113	tdc1	9.318	10.958	5.0887	4.66352	-0.425173	0	0.29777	1.38866	-0.126604
00000001_1.tif	control	MT13113	tdc1	9.318	10.646	5.0887	4.63944	-0.449253	0	0.29777	1.38149	-0.133774
00000001_1.tif	control	MT13113	tdc1	9.484	10.797	5.0887	4.483	-0.605697	0	0.29777	1.3349	-0.180359
00000001_1.tif	control	MT13113	tdc1	9.484	10.964	5.0887	4.49927	-0.589429	0	0.29777	1.33975	-0.175514
00000001_1.tif	control	MT13113	tdc1	9.604	11.026	5.0887	4.3879	-0.700793	0	0.29777	1.30659	-0.208675
00000001_1.tif	control	MT13113	tdc1	9.781	10.75	5.0887	4.18328	-0.905416	0	0.29777	1.24566	-0.269606
00000001_1.tif	control	MT13113	tdc1	9.656	10.594	5.0887	4.29965	-0.789044	0	0.29777	1.28031	-0.234954
00000001_1.tif	control	MT13113	tdc1	10.068	10.448	5.0887	3.885	-1.20369	0	0.29777	1.15684	-0.358424
00000001_1.tif	control	MT13113	tdc1	9.891	10.344	5.0887	4.06321	-1.02549	0	0.29777	1.2099	-0.30536
00000001_1.tif	control	MT13113	tdc1	9.896	10.188	5.0887	4.06501	-1.02369	0	0.29777	1.21044	-0.304824
00000001_1.tif	control	MT13113	tdc1	9.271	10.193	5.0887	4.68867	-0.400026	0	0.29777	1.39615	-0.119116
00000001_1.tif	control	MT13113	tdc1	9.411	9.917	5.0887	4.57236	-0.51634	0	0.29777	1.36151	-0.153751
00000001_1.tif	control	MT13113	tdc1	9.573	9.922	5.0887	4.41088	-0.677818	0	0.29777	1.31343	-0.201834
00000001_1.tif	control	MT13113	tdc1	9.594	9.766	5.0887	4.41126	-0.677437	0	0.29777	1.31354	-0.20172
00000001_1.tif	control	MT13113	tdc1	9.526	9.552	5.0887	4.51577	-0.572923	0	0.29777	1.34466	-0.170599
00000001_1.tif	control	MT13113	tdc1	9.807	9.495	5.0887	4.253	-0.835695	0	0.29777	1.26642	-0.248845
00000001_1.tif	control	MT13113	tdc1	9.854	9.422	5.0887	4.22424	-0.864452	0	0.29777	1.25785	-0.257408
00000001_1.tif	control	MT13113	tdc1	9.88	9.698	5.0887	4.14057	-0.948122	0	0.29777	1.23294	-0.282322
00000001_1.tif	control	MT13113	tdc1	9.922	9.547	5.0887	4.12938	-0.959316	0	0.29777	1.22961	-0.285656
00000001_1.tif	control	MT13113	tdc1	10.104	9.438	5.0887	3.97804	-1.11065	0	0.29777	1.18454	-0.330719
00000001_1.tif	control	MT13113	tdc1	9.63	9.188	5.0887	4.50148	-0.587213	0	0.29777	1.34041	-0.174854
00000001_1.tif	control	MT13113	tdc1	10.036	9.911	5.0887	3.95296	-1.13573	0	0.29777	1.17707	-0.338187
00000001_1.tif	control	MT13113	tdc1	10.156	10.01	5.0887	3.82161	-1.26709	0	0.29777	1.13796	-0.3773
00000001_1.tif	control	MT13113	tdc1	10.703	10.062	5.0887	3.27226	-1.81644	0	0.29777	0.97438	-0.540881
00000001_1.tif	control	MT13113	tdc1	11.052	10.073	5.0887	2.9245	-2.1642	0	0.29777	0.870828	-0.644433
00000001_1.tif	control	MT13113	tdc1	10.495	9.568	5.0887	3.56699	-1.52171	0	0.29777	1.06214	-0.45312
00000001_1.tif	control	MT13113	tdc1	10.443	8.734	5.0887	3.90394	-1.18475	0	0.29777	1.16248	-0.352784
00000001_1.tif	control	MT13113	tdc1	10.286	8.688	5.0887	4.06533	-1.02337	0	0.29777	1.21053	-0.304727
00000001_1.tif	control	MT13113	tdc1	10.438	8.531	5.0887	4.00137	-1.08733	0	0.29777	1.19149	-0.323773
00000001_1.tif	control	MT13113	tdc1	14.052	3.906	5.0887	6.53775	1.44905	1	0.29777	1.94675	0.431485
00000001_1.tif	control	MT13113	tdc1	11.974	6.648	5.0887	4.28001	-0.808688	0	0.29777	1.27446	-0.240803
00000001_1.tif	control	MT13113	tdc1	13.026	6.682	5.0887	3.87356	-1.21514	0	0.29777	1.15343	-0.361832
00000001_1.tif	control	MT13113	tdc1	13.262	6.679	5.0887	3.8269	-1.26179	0	0.29777	1.13954	-0.375724
00000001_1.tif	control	MT13113	tdc1	13.536	6.8	5.0887	3.66679	-1.42191	0	0.29777	1.09186	-0.423401
00000001_1.tif	control	MT13113	tdc1	13.627	6.72	5.0887	3.73725	-1.35145	0	0.29777	1.11284	-0.402421
00000001_1.tif	control	MT13113	tdc1	13.509	6.082	5.0887	4.38354	-0.705152	0	0.29777	1.30529	-0.209973
00000001_1.tif	control	MT13113	tdc1	14.446	6.28	5.0887	4.19209	-0.896606	0	0.29777	1.24828	-0.266982
00000001_1.tif	control	MT13113	tdc1	14.502	6.009	5.0887	4.46786	-0.620838	0	0.29777	1.33039	-0.184867
00000001_1.tif	control	MT13113	tdc1	12.623	7.273	5.0887	3.4377	-1.65099	0	0.29777	1.02364	-0.491616
00000001_1.tif	control	MT13113	tdc1	12.418	8.592	5.0887	2.40467	-2.68403	0	0.29777	0.716038	-0.799223
00000001_1.tif	control	MT13113	tdc1	12.839	8.585	5.0887	2.16637	-2.92233	0	0.29777	0.64508	-0.870181
00000001_1.tif	control	MT13113	tdc1	12.248	8.717	5.0887	2.42613	-2.66257	0	0.29777	0.722428	-0.792833
00000001_1.tif	control	MT13113	tdc1	12.2	8.901	5.0887	2.33469	-2.75401	0	0.29777	0.6952	-0.820061
00000001_1.tif	control	MT13113	tdc1	12.259	9.023	5.0887	2.21044	-2.87826	0	0.29777	0.658202	-0.857059
00000001_1.tif	control	MT13113	tdc1	11.984	9.148	5.0887	2.35669	-2.73201	0	0.29777	0.701751	-0.81351
00000001_1.tif	control	MT13113	tdc1	12.061	9.769	5.0887	2.00847	-3.08023	0	0.29777	0.598061	-0.9172
00000001_1.tif	control	MT13113	tdc1	13.97	9.168	5.0887	1.27511	-3.81358	0	0.29777	0.37969	-1.13557
00000001_1.tif	control	MT13113	tdc1	11.856	10.415	5.0887	2.09719	-2.99151	0	0.29777	0.624479	-0.890782
00000001_1.tif	control	MT13113	tdc1	11.523	10.849	5.0887	2.46368	-2.62501	0	0.29777	0.733611	-0.78165
00000001_1.tif	control	MT13113	tdc1	11.675	11.064	5.0887	2.36113	-2.72757	0	0.29777	0.703073	-0.812188
00000001_1.tif	control	MT13113	tdc1	11.825	10.248	5.0887	2.13692	-2.95178	0	0.29777	0.636309	-0.878952
00000001_1.tif	control	MT13113	tdc1	13.193	10.832	5.0887	0.853769	-4.23493	0	0.29777	0.254227	-1.26103
00000001_1.tif	control	MT13113	tdc1	13.443	10.807	5.0887	0.626575	-4.46212	0	0.29777	0.186575	-1.32869
00000001_1.tif	control	MT13113	tdc1	13.536	10.179	5.0887	0.493543	-4.59515	0	0.29777	0.146962	-1.3683
00000001_1.tif	control	MT13113	tdc1	14.55	11.144	5.0887	0.920766	-4.16793	0	0.29777	0.274176	-1.24108
00000001_1.tif	control	MT13113	tdc1	14.616	10.984	5.0887	0.855716	-4.23298	0	0.29777	0.254807	-1.26045
00000001_1.tif	control	MT13113	tdc1	14.467	10.884	5.0887	0.677257	-4.41144	0	0.29777	0.201667	-1.31359
00000001_1.tif	control	MT13113	tdc1	14.418	10.668	5.0887	0.516575	-4.57212	0	0.29777	0.153821	-1.36144
00000001_1.tif	control	MT13113	tdc1	14.429	10.547	5.0887	0.487229	-4.60147	0	0.29777	0.145082	-1.37018
00000001_1.tif	control	MT13113	tdc1	14.609	10.411	5.0887	0.65678	-4.43192	0	0.29777	0.195569	-1.31969
00000001_1.tif	control	MT13113	tdc1	14.599	10.151	5.0887	0.708929	-4.37977	0	0.29777	0.211098	-1.30416
00000001_1.tif	control	MT13113	tdc1	14.521	15.76	5.0887	5.34725	0.258557	1	0.29777	1.59225	0.0769905
00000001_1.tif	control	MT13113	tdc1	14.557	15.62	5.0887	5.21212	0.123419	1	0.29777	1.55201	0.0367505
00000001_1.tif	control	MT13113	tdc1	14.99	15.411	5.0887	5.07508	-0.0136204	0	0.29777	1.51121	-0.00405574
00000001_1.tif	control	MT13113	tdc1	15.177	15.474	5.0887	5.17775	0.089058	1	0.29777	1.54178	0.0265188
00000001_1.tif	control	MT13113	tdc1	15.333	15.365	5.0887	5.1118	0.0231025	1	0.29777	1.52214	0.00687922
00000001_1.tif	control	MT13113	tdc1	16.328	14.365	5.0887	4.58505	-0.503643	0	0.29777	1.36529	-0.14997
00000001_1.tif	control	MT13113	tdc1	16.474	14.198	5.0887	4.52277	-0.565924	0	0.29777	1.34675	-0.168515
00000001_1.tif	control	MT13113	tdc1	15.75	13.943	5.0887	3.93436	-1.15433	0	0.29777	1.17154	-0.343726
00000001_1.tif	control	MT13113	tdc1	15.927	13.922	5.0887	4.00001	-1.08868	0	0.29777	1.19108	-0.324177
00000001_1.tif	control	MT13113	tdc1	15.208	13.276	5.0887	3.09853	-1.99016	0	0.29777	0.922651	-0.592611
00000001_1.tif	control	MT13113	tdc1	15.76	13.417	5.0887	3.47993	-1.60876	0	0.29777	1.03622	-0.479042
00000001_1.tif	control	MT13113	tdc1	15.5	12.49	5.0887	2.56582	-2.52288	0	0.29777	0.764023	-0.751238
00000001_1.tif	control	MT13113	tdc1	15.255	12.047	5.0887	2.06592	-3.02278	0	0.29777	0.615169	-0.900092
00000001_1.tif	control	MT13113	tdc1	15.896	12.255	5.0887	2.6568	-2.43189	0	0.29777	0.791116	-0.724145
00000001_1.tif	control	MT13113	tdc1	16.292	12.396	5.0887	3.04715	-2.04154	0	0.29777	0.90735	-0.607911
00000001_1.tif	control	MT13113	tdc1	16.073	12.828	5.0887	3.19102	-1.89767	0	0.29777	0.950191	-0.56507
00000001_1.tif	control	MT13113	tdc1	16.51	13.125	5.0887	3.70559	-1.38311	0	0.29777	1.10341	-0.411848
00000001_1.tif	control	MT13113	tdc1	16.63	13.177	5.0887	3.82637	-1.26233	0	0.29777	1.13938	-0.375884
00000001_1.tif	control	MT13113	tdc1	16.854	13.203	5.0887	4.00417	-1.08452	0	0.29777	1.19232	-0.322938
00000001_1.tif	control	MT13113	tdc1	17.469	13.609	5.0887	4.73136	-0.357331	0	0.29777	1.40886	-0.106403
00000001_1.tif	control	MT13113	tdc1	17.599	13.333	5.0887	4.65246	-0.436233	0	0.29777	1.38536	-0.129897
00000001_1.tif	control	MT13113	tdc1	17.448	13.24	5.0887	4.47641	-0.612287	0	0.29777	1.33294	-0.182321
00000001_1.tif	control	MT13113	tdc1	17.641	12.797	5.0887	4.37523	-0.713463	0	0.29777	1.30281	-0.212448
00000001_1.tif	control	MT13113	tdc1	17.51	12.5	5.0887	4.10895	-0.979743	0	0.29777	1.22352	-0.291738
00000001_1.tif	control	MT13113	tdc1	17.344	12.391	5.0887	3.9107	-1.17799	0	0.29777	1.16449	-0.350771
00000001_1.tif	control	MT13113	tdc1	17.625	12.354	5.0887	4.13951	-0.949191	0	0.29777	1.23262	-0.282641
00000001_1.tif	control	MT13113	tdc1	16.812	12.188	5.0887	3.34946	-1.73923	0	0.29777	0.99737	-0.517891
00000001_1.tif	control	MT13113	tdc1	16.474	11.688	5.0887	2.81167	-2.27703	0	0.29777	0.83723	-0.678031
00000001_1.tif	control	MT13113	tdc1	17.005	11.766	5.0887	3.32641	-1.76228	0	0.29777	0.990506	-0.524755
00000001_1.tif	control	MT13113	tdc1	17.229	11.75	5.0887	3.5271	-1.5616	0	0.29777	1.05026	-0.464997
00000001_1.tif	control	MT13113	tdc1	17.5	11.198	5.0887	3.62646	-1.46223	0	0.29777	1.07985	-0.435409
00000001_1.tif	control	MT13113	tdc1	17.438	10.729	5.0887	3.49672	-1.59198	0	0.29777	1.04122	-0.474044
00000001_1.tif	control	MT13113	tdc1	15.75	11.031	5.0887	1.89075	-3.19794	0	0.29777	0.56301	-0.952251
00000001_1.tif	control	MT13113	tdc1	15.365	11.068	5.0887	1.54414	-3.54456	0	0.29777	0.459799	-1.05546
00000001_1.tif	control	MT13113	tdc1	14.151	9.635	5.0887	0.831906	-4.25679	0	0.29777	0.247717	-1.26754
00000001_1.tif	control	MT13113	tdc1	14.438	9.047	5.0887	1.47785	-3.61085	0	0.29777	0.440059	-1.0752
00000001_1.tif	control	MT13113	tdc1	14.833	9.281	5.0887	1.45762	-3.63108	0	0.29777	0.434034	-1.08123
00000001_1.tif	control	MT13113	tdc1	14.87	9.052	5.0887	1.66606	-3.42263	0	0.29777	0.496104	-1.01916
00000001_1.tif	control	MT13113	tdc1	15.349	9.385	5.0887	1.75162	-3.33707	0	0.29777	0.521581	-0.993681
00000001_1.tif	control	MT13113	tdc1	16.135	9.036	5.0887	2.5963	-2.4924	0	0.29777	0.7731	-0.742161
00000001_1.tif	control	MT13113	tdc1	16.969	9.036	5.0887	3.32805	-1.76065	0	0.29777	0.990993	-0.524268
00000001_1.tif	control	MT13113	tdc1	17.312	9.219	5.0887	3.57506	-1.51364	0	0.29777	1.06455	-0.450715
00000001_1.tif	control	MT13113	tdc1	17.385	9.167	5.0887	3.66153	-1.42717	0	0.29777	1.09029	-0.424967
00000001_1.tif	control	MT13113	tdc1	17.552	9.057	5.0887	3.85666	-1.23204	0	0.29777	1.1484	-0.366865
00000001_1.tif	control	MT13113	tdc1	17.641	8.01	5.0887	4.41824	-0.670457	0	0.29777	1.31562	-0.199642
00000001_1.tif	control	MT13113	tdc1	17.708	7.927	5.0887	4.51999	-0.568709	0	0.29777	1.34592	-0.169345
00000001_1.tif	control	MT13113	tdc1	16.823	8.589	5.0887	3.41676	-1.67194	0	0.29777	1.01741	-0.497854
00000001_1.tif	control	MT13113	tdc1	16.755	8.219	5.0887	3.57734	-1.51135	0	0.29777	1.06523	-0.450036
00000001_1.tif	control	MT13113	tdc1	16.578	8.031	5.0887	3.56488	-1.52382	0	0.29777	1.06151	-0.453747
00000001_1.tif	control	MT13113	tdc1	16.818	8	5.0887	3.76517	-1.32353	0	0.29777	1.12115	-0.394108
00000001_1.tif	control	MT13113	tdc1	16.693	7.839	5.0887	3.78	-1.30869	0	0.29777	1.12557	-0.38969
00000001_1.tif	control	MT13113	tdc1	16.594	7.719	5.0887	3.79408	-1.29461	0	0.29777	1.12976	-0.385497
00000001_1.tif	control	MT13113	tdc1	15.151	7.484	5.0887	3.19232	-1.89638	0	0.29777	0.950576	-0.564685
00000001_1.tif	control	MT13113	tdc1	15.37	6.766	5.0887	3.94059	-1.14811	0	0.29777	1.17339	-0.341873
00000001_1.tif	control	MT13113	tdc1	16.073	6.75	5.0887	4.25824	-0.830451	0	0.29777	1.26798	-0.247283
00000001_1.tif	control	MT13113	tdc1	16.125	6.682	5.0887	4.34312	-0.745574	0	0.29777	1.29325	-0.22201
00000001_1.tif	control	MT13113	tdc1	17.401	6.474	5.0887	5.25753	0.168838	1	0.29777	1.56554	0.0502749
00000001_1.tif	control	MT13113	tdc1	15.484	5.615	5.0887	5.06493	-0.0237632	0	0.29777	1.50819	-0.00707596
00000001_1.tif	control	MT13113	tdc1	17.896	8.089	5.0887	4.59223	-0.496467	0	0.29777	1.36743	-0.147833
00000001_1.tif	control	MT13113	tdc1	17.901	8.208	5.0887	4.53673	-0.551965	0	0.29777	1.3509	-0.164359
00000001_1.tif	control	MT13113	tdc1	17.828	8.307	5.0887	4.42472	-0.663979	0	0.29777	1.31755	-0.197713
00000001_1.tif	control	MT13113	tdc1	18.115	8.578	5.0887	4.56075	-0.527943	0	0.29777	1.35806	-0.157206
00000001_1.tif	control	MT13113	tdc1	18.26	8.651	5.0887	4.66492	-0.423772	0	0.29777	1.38907	-0.126187
00000001_1.tif	control	MT13113	tdc1	18.172	9.271	5.0887	4.37876	-0.709935	0	0.29777	1.30386	-0.211397
00000001_1.tif	control	MT13113	tdc1	18.432	9.474	5.0887	4.58262	-0.506077	0	0.29777	1.36457	-0.150694
00000001_1.tif	control	MT13113	tdc1	18.531	9.651	5.0887	4.646	-0.442693	0	0.29777	1.38344	-0.131821
00000001_1.tif	control	MT13113	tdc1	18.589	9.479	5.0887	4.73517	-0.353531	0	0.29777	1.40999	-0.105271
00000001_1.tif	control	MT13113	tdc1	19.057	8.469	5.0887	5.47243	0.383734	1	0.29777	1.62953	0.114265
00000001_1.tif	control	MT13113	tdc1	20.51	8.458	5.0887	6.85087	1.76218	1	0.29777	2.03998	0.524724
00000001_1.tif	control	MT13113	tdc1	21.292	8.453	5.0887	7.60401	2.51532	1	0.29777	2.26425	0.748986
00000001_1.tif	control	MT13113	tdc1	19.562	10.443	5.0887	5.609	0.520304	1	0.29777	1.67019	0.154931
00000001_1.tif	control	MT13113	tdc1	19.797	10.151	5.0887	5.85129	0.762594	1	0.29777	1.74234	0.227078
00000001_1.tif	control	MT13113	tdc1	19.974	10.104	5.0887	6.03054	0.94184	1	0.29777	1.79571	0.280452
00000001_1.tif	control	MT13113	tdc1	20.047	9.995	5.0887	6.11045	1.02175	1	0.29777	1.81951	0.304246
00000001_1.tif	control	MT13113	tdc1	20.062	10.245	5.0887	6.11221	1.02351	1	0.29777	1.82003	0.304771
00000001_1.tif	control	MT13113	tdc1	20.078	10.396	5.0887	6.12518	1.03648	1	0.29777	1.82389	0.308634
00000001_1.tif	control	MT13113	tdc1	18.057	11.052	5.0887	4.14894	-0.939757	0	0.29777	1.23543	-0.279831
00000001_1.tif	control	MT13113	tdc1	17.979	11.177	5.0887	4.09236	-0.996333	0	0.29777	1.21858	-0.296678
00000001_1.tif	control	MT13113	tdc1	17.755	13.083	5.0887	4.62869	-0.460003	0	0.29777	1.37829	-0.136975
00000001_1.tif	control	MT13113	tdc1	18.047	12.87	5.0887	4.75932	-0.329372	0	0.29777	1.41718	-0.0980771
00000001_1.tif	control	MT13113	tdc1	18.198	12.766	5.0887	4.83904	-0.249651	0	0.29777	1.44092	-0.0743387
00000001_1.tif	control	MT13113	tdc1	18.125	12.417	5.0887	4.61544	-0.473259	0	0.29777	1.37434	-0.140922
00000001_1.tif	control	MT13113	tdc1	18.036	12.359	5.0887	4.5102	-0.578492	0	0.29777	1.343	-0.172257
00000001_1.tif	control	MT13113	tdc1	18.953	12.401	5.0887	5.36971	0.281012	1	0.29777	1.59894	0.0836769
00000001_1.tif	control	MT13113	tdc1	18.833	11.964	5.0887	5.11154	0.0228439	1	0.29777	1.52206	0.00680224
00000001_1.tif	control	MT13113	tdc1	19.401	12.016	5.0887	5.67054	0.581845	1	0.29777	1.68852	0.173256
00000001_1.tif	control	MT13113	tdc1	20.318	11.177	5.0887	6.40718	1.31849	1	0.29777	1.90787	0.392606
00000001_1.tif	control	MT13113	tdc1	17.938	13.755	5.0887	5.18166	0.0929609	1	0.29777	1.54294	0.027681
00000001_1.tif	control	MT13113	tdc1	18.042	13.573	5.0887	5.14945	0.0607526	1	0.29777	1.53335	0.0180903
00000001_1.tif	control	MT13113	tdc1	18.271	13.635	5.0887	5.36973	0.281033	1	0.29777	1.59894	0.0836831
00000001_1.tif	control	MT13113	tdc1	18.516	13.443	5.0887	5.46086	0.372162	1	0.29777	1.62608	0.110819
00000001_1.tif	control	MT13113	tdc1	18.635	13.562	5.0887	5.62577	0.537074	1	0.29777	1.67519	0.159924
00000001_1.tif	control	MT13113	tdc1	18.359	14.792	5.0887	6.19085	1.10216	1	0.29777	1.84345	0.328189
00000001_1.tif	control	MT13113	tdc1	19.151	13.823	5.0887	6.20029	1.11159	1	0.29777	1.84626	0.331
00000001_1.tif	control	MT13113	tdc1	19.172	13.984	5.0887	6.30687	1.21818	1	0.29777	1.878	0.362736
00000001_1.tif	control	MT13113	tdc1	19.891	14.219	5.0887	7.0369	1.94821	1	0.29777	2.09538	0.580118
00000001_1.tif	control	MT13113	tdc1	19.99	14.745	5.0887	7.413	2.3243	1	0.29777	2.20737	0.692108
00000001_1.tif	control	MT13113	tdc1	20.427	14.802	5.0887	7.80471	2.71602	1	0.29777	2.32401	0.808749
00000001_1.tif	control	MT13113	tdc1	17.911	15.29	5.0887	6.25773	1.16903	1	0.29777	1.86336	0.348103
00000001_1.tif	control	MT13113	tdc1	18.78	15.547	5.0887	7.02501	1.93631	1	0.29777	2.09184	0.576576
00000001_1.tif	control	MT13113	tdc1	17.314	16.318	5.0887	6.76845	1.67976	1	0.29777	2.01544	0.500181
00000001_1.tif	control	MT13113	tdc1	18.127	16.707	5.0887	7.52728	2.43859	1	0.29777	2.2414	0.726138
00000001_1.tif	control	MT13113	tdc1	18.231	16.658	5.0887	7.54503	2.45634	1	0.29777	2.24668	0.731423
00000001_1.tif	control	MT13113	tdc1	18.55	17.561	5.0887	8.47339	3.38469	1	0.29777	2.52312	1.00786
00000001_1.tif	control	MT13113	tdc1	21.99	10.401	5.0887	8.03711	2.94841	1	0.29777	2.39321	0.877949
00000001_8.tif	predator	MT15434	tph1	5.417	14.698	5.53662	10.381	4.84437	1	0.29777	3.09115	1.44251
00000001_8.tif	predator	MT15434	tph1	7.648	17.741	5.53662	9.97091	4.43429	1	0.29777	2.96904	1.3204
00000001_8.tif	predator	MT15434	tph1	7.606	17.95	5.53662	10.14	4.60335	1	0.29777	3.01938	1.37074
00000001_8.tif	predator	MT15434	tph1	11.276	17.623	5.53662	7.49938	1.96275	1	0.29777	2.23309	0.584449
00000001_8.tif	predator	MT15434	tph1	11.248	14.578	5.53662	5.17922	-0.357399	0	0.29777	1.54222	-0.106423
00000001_8.tif	predator	MT15434	tph1	13.748	15.009	5.53662	4.0457	-1.49093	0	0.29777	1.20469	-0.443954
00000001_8.tif	predator	MT15434	tph1	13.061	14.036	5.53662	3.52695	-2.00967	0	0.29777	1.05022	-0.598421
00000001_8.tif	predator	MT15434	tph1	9.991	12.502	5.53662	5.36403	-0.172598	0	0.29777	1.59725	-0.0513945
00000001_8.tif	predator	MT15434	tph1	11.345	12.606	5.53662	4.0947	-1.44193	0	0.29777	1.21928	-0.429362
00000001_8.tif	predator	MT15434	tph1	11.325	12.467	5.53662	4.0693	-1.46733	0	0.29777	1.21171	-0.436926
00000001_8.tif	predator	MT15434	tph1	12.387	11.599	5.53662	2.83956	-2.69707	0	0.29777	0.845535	-0.803106
00000001_8.tif	predator	MT15434	tph1	10.561	11.064	5.53662	4.64511	-0.891511	0	0.29777	1.38317	-0.265465
00000001_8.tif	predator	MT15434	tph1	10.401	10.023	5.53662	4.95235	-0.584278	0	0.29777	1.47466	-0.17398
00000001_8.tif	predator	MT15434	tph1	10.957	9.786	5.53662	4.48611	-1.05051	0	0.29777	1.33583	-0.31281
00000001_8.tif	predator	MT15434	tph1	9.602	8.63	5.53662	6.17673	0.640109	1	0.29777	1.83925	0.190605
00000001_8.tif	predator	MT15434	tph1	11.7	6.578	5.53662	5.82661	0.289983	1	0.29777	1.73499	0.0863484
00000001_8.tif	predator	MT15434	tph1	11.533	6.46	5.53662	6.02163	0.485002	1	0.29777	1.79306	0.144419
00000001_8.tif	predator	MT15434	tph1	11.151	2.773	5.53662	9.38122	3.84459	1	0.29777	2.79344	1.1448
00000001_8.tif	predator	MT15434	tph1	12.7	2.786	5.53662	8.811	3.27438	1	0.29777	2.62365	0.975011
00000001_8.tif	predator	MT15434	tph1	13.019	3.773	5.53662	7.77408	2.23746	1	0.29777	2.31489	0.666249
00000001_8.tif	predator	MT15434	tph1	13.068	3.564	5.53662	7.9616	2.42498	1	0.29777	2.37073	0.722086
00000001_8.tif	predator	MT15434	tph1	14.391	2.339	5.53662	8.93199	3.39536	1	0.29777	2.65968	1.01104
00000001_8.tif	predator	MT15434	tph1	14.531	2.276	5.53662	8.98317	3.44655	1	0.29777	2.67492	1.02628
00000001_8.tif	predator	MT15434	tph1	14.104	4.26	5.53662	7.06006	1.52344	1	0.29777	2.10227	0.453634
00000001_8.tif	predator	MT15434	tph1	14.656	3.953	5.53662	7.30152	1.7649	1	0.29777	2.17417	0.525533
00000001_8.tif	predator	MT15434	tph1	16.448	5.786	5.53662	5.58845	0.0518228	1	0.29777	1.66407	0.0154313
00000001_8.tif	predator	MT15434	tph1	17.146	6.943	5.53662	4.71041	-0.826217	0	0.29777	1.40262	-0.246023
00000001_8.tif	predator	MT15434	tph1	16.839	7.771	5.53662	3.83	-1.70663	0	0.29777	1.14046	-0.508183
00000001_8.tif	predator	MT15434	tph1	14.953	7.464	5.53662	3.77828	-1.75834	0	0.29777	1.12506	-0.523582
00000001_8.tif	predator	MT15434	tph1	14.917	7.115	5.53662	4.12892	-1.40771	0	0.29777	1.22947	-0.419173
00000001_8.tif	predator	MT15434	tph1	15.099	7.01	5.53662	4.22528	-1.31134	0	0.29777	1.25816	-0.390479
00000001_8.tif	predator	MT15434	tph1	14.927	10.349	5.53662	0.927039	-4.60958	0	0.29777	0.276044	-1.3726
00000001_8.tif	predator	MT15434	tph1	16.885	9.188	5.53662	2.64863	-2.88799	0	0.29777	0.788683	-0.859958
00000001_8.tif	predator	MT15434	tph1	17.12	9.911	5.53662	2.32921	-3.20741	0	0.29777	0.693569	-0.955072
00000001_8.tif	predator	MT15434	tph1	17	11.021	5.53662	1.80958	-3.72704	0	0.29777	0.538838	-1.1098
00000001_8.tif	predator	MT15434	tph1	17.589	10.917	5.53662	2.40697	-3.12966	0	0.29777	0.716722	-0.931918
00000001_8.tif	predator	MT15434	tph1	17.724	11.005	5.53662	2.53138	-3.00524	0	0.29777	0.753769	-0.894871
00000001_8.tif	predator	MT15434	tph1	16.616	11.516	5.53662	1.44087	-4.09576	0	0.29777	0.429046	-1.21959
00000001_8.tif	predator	MT15434	tph1	16.595	11.703	5.53662	1.46889	-4.06774	0	0.29777	0.43739	-1.21125
00000001_8.tif	predator	MT15434	tph1	15.488	15.318	5.53662	4.09393	-1.44269	0	0.29777	1.21905	-0.42959
00000001_8.tif	predator	MT15434	tph1	18.023	14.484	5.53662	4.30289	-1.23373	0	0.29777	1.28127	-0.367367
00000001_8.tif	predator	MT15434	tph1	18.477	15.957	5.53662	5.74681	0.210185	1	0.29777	1.71123	0.0625868
00000001_8.tif	predator	MT15434	tph1	18.63	15.519	5.53662	5.48685	-0.0497704	0	0.29777	1.63382	-0.0148201
00000001_8.tif	predator	MT15434	tph1	20.686	15.72	5.53662	7.08431	1.54769	1	0.29777	2.1095	0.460855
00000001_8.tif	predator	MT15434	tph1	20.717	7.453	5.53662	6.68582	1.14919	1	0.29777	1.99084	0.342196
00000001_8.tif	predator	MT15434	tph1	17.828	2.078	5.53662	9.52486	3.98824	1	0.29777	2.83622	1.18758
00000002_9.tif	control	MT9455	tbh1	8.922	7.724	5.47924	6.52467	1.04544	1	0.29777	1.94285	0.311299
00000002_9.tif	control	MT9455	tbh1	8.99	7.849	5.47924	6.41006	0.930819	1	0.29777	1.90872	0.27717
00000002_9.tif	control	MT9455	tbh1	10.094	8.375	5.47924	5.18728	-0.291958	0	0.29777	1.54462	-0.0869363
00000002_9.tif	control	MT9455	tbh1	9.802	8.979	5.47924	5.24488	-0.234353	0	0.29777	1.56177	-0.0697833
00000002_9.tif	control	MT9455	tbh1	7.75	9.682	5.47924	7.11285	1.63361	1	0.29777	2.11799	0.486441
00000002_9.tif	control	MT9455	tbh1	7.615	10.245	5.47924	7.20268	1.72344	1	0.29777	2.14474	0.51319
00000002_9.tif	control	MT9455	tbh1	7.677	10.406	5.47924	7.13609	1.65686	1	0.29777	2.12491	0.493363
00000002_9.tif	control	MT9455	tbh1	9.062	11.161	5.47924	5.78441	0.305173	1	0.29777	1.72242	0.0908715
00000002_9.tif	control	MT9455	tbh1	9.115	10.865	5.47924	5.70678	0.227546	1	0.29777	1.69931	0.0677563
00000002_9.tif	control	MT9455	tbh1	9.693	11.411	5.47924	5.19409	-0.285148	0	0.29777	1.54664	-0.0849084
00000002_9.tif	control	MT9455	tbh1	9.776	11.182	5.47924	5.0779	-0.401334	0	0.29777	1.51205	-0.119505
00000002_9.tif	control	MT9455	tbh1	10.193	10.646	5.47924	4.62043	-0.858805	0	0.29777	1.37583	-0.255726
00000002_9.tif	control	MT9455	tbh1	10.406	10.943	5.47924	4.42522	-1.05402	0	0.29777	1.3177	-0.313854
00000002_9.tif	control	MT9455	tbh1	10.698	10.443	5.47924	4.11494	-1.3643	0	0.29777	1.22531	-0.406246
00000002_9.tif	control	MT9455	tbh1	11	10.76	5.47924	3.81887	-1.66036	0	0.29777	1.13715	-0.494407
00000002_9.tif	control	MT9455	tbh1	11.073	10.667	5.47924	3.74147	-1.73776	0	0.29777	1.1141	-0.517454
00000002_9.tif	control	MT9455	tbh1	10.807	11.427	5.47924	4.104	-1.37523	0	0.29777	1.22205	-0.409503
00000002_9.tif	control	MT9455	tbh1	10.542	11.281	5.47924	4.33537	-1.14387	0	0.29777	1.29094	-0.34061
00000002_9.tif	control	MT9455	tbh1	10.245	12.917	5.47924	5.15272	-0.32652	0	0.29777	1.53432	-0.097228
00000002_9.tif	control	MT9455	tbh1	10.259	14.085	5.47924	5.77587	0.296638	1	0.29777	1.71988	0.0883298
00000002_9.tif	control	MT9455	tbh1	10.932	13.755	5.47924	5.04466	-0.434578	0	0.29777	1.50215	-0.129404
00000002_9.tif	control	MT9455	tbh1	11.002	13.714	5.47924	4.96463	-0.514603	0	0.29777	1.47832	-0.153233
00000002_9.tif	control	MT9455	tbh1	11.273	13.661	5.47924	4.72456	-0.754681	0	0.29777	1.40683	-0.224722
00000002_9.tif	control	MT9455	tbh1	11.113	14.262	5.47924	5.25385	-0.225384	0	0.29777	1.56444	-0.0671127
00000002_9.tif	control	MT9455	tbh1	11.148	14.043	5.47924	5.07534	-0.4039	0	0.29777	1.51128	-0.120269
00000002_9.tif	control	MT9455	tbh1	11.557	14.134	5.47924	4.85558	-0.623659	0	0.29777	1.44585	-0.185707
00000002_9.tif	control	MT9455	tbh1	11.648	14.043	5.47924	4.72705	-0.752183	0	0.29777	1.40757	-0.223977
00000002_9.tif	control	MT9455	tbh1	11.689	13.995	5.47924	4.66395	-0.815287	0	0.29777	1.38878	-0.242768
00000002_9.tif	control	MT9455	tbh1	11.797	14.411	5.47924	4.91372	-0.565519	0	0.29777	1.46316	-0.168394
00000002_9.tif	control	MT9455	tbh1	11.613	15.089	5.47924	5.56857	0.0893328	1	0.29777	1.65815	0.0266006
00000002_9.tif	control	MT9455	tbh1	11.46	14.929	5.47924	5.52977	0.0505291	1	0.29777	1.6466	0.015046
00000002_9.tif	control	MT9455	tbh1	12.182	13.505	5.47924	3.97009	-1.50915	0	0.29777	1.18217	-0.44938
00000002_9.tif	control	MT9455	tbh1	12.405	13.561	5.47924	3.8697	-1.60954	0	0.29777	1.15228	-0.479273
00000002_9.tif	control	MT9455	tbh1	12.45	13.47	5.47924	3.77051	-1.70872	0	0.29777	1.12275	-0.508807
00000002_9.tif	control	MT9455	tbh1	13.146	16.281	5.47924	5.98649	0.507253	1	0.29777	1.7826	0.151045
00000002_9.tif	control	MT9455	tbh1	13.12	16.135	5.47924	5.85386	0.374624	1	0.29777	1.7431	0.111552
00000002_9.tif	control	MT9455	tbh1	13.229	16.016	5.47924	5.70886	0.229626	1	0.29777	1.69993	0.0683758
00000002_9.tif	control	MT9455	tbh1	13.307	15.828	5.47924	5.50665	0.027417	1	0.29777	1.63972	0.00816397
00000002_9.tif	control	MT9455	tbh1	13.156	15.74	5.47924	5.4659	-0.0133408	0	0.29777	1.62758	-0.00397248
00000002_9.tif	control	MT9455	tbh1	12.729	15.589	5.47924	5.47012	-0.00911291	0	0.29777	1.62884	-0.00271355
00000002_9.tif	control	MT9455	tbh1	12.74	15.443	5.47924	5.33113	-0.148108	0	0.29777	1.58745	-0.0441022
00000002_9.tif	control	MT9455	tbh1	13.547	14.229	5.47924	3.90838	-1.57086	0	0.29777	1.1638	-0.467754
00000002_9.tif	control	MT9455	tbh1	13.786	13.958	5.47924	3.57729	-1.90195	0	0.29777	1.06521	-0.566343
00000002_9.tif	control	MT9455	tbh1	13.677	13.807	5.47924	3.46704	-2.01219	0	0.29777	1.03238	-0.59917
00000002_9.tif	control	MT9455	tbh1	14.104	13.609	5.47924	3.15838	-2.32086	0	0.29777	0.94047	-0.691082
00000002_9.tif	control	MT9455	tbh1	14.224	13.63	5.47924	3.15429	-2.32495	0	0.29777	0.939253	-0.692299
00000002_9.tif	control	MT9455	tbh1	14.542	14.302	5.47924	3.78065	-1.69858	0	0.29777	1.12577	-0.505787
00000002_9.tif	control	MT9455	tbh1	14.557	14.193	5.47924	3.67087	-1.80837	0	0.29777	1.09307	-0.538478
00000002_9.tif	control	MT9455	tbh1	14.823	14.177	5.47924	3.64602	-1.83322	0	0.29777	1.08567	-0.545878
00000002_9.tif	control	MT9455	tbh1	15.51	14.083	5.47924	3.61993	-1.8593	0	0.29777	1.07791	-0.553645
00000002_9.tif	control	MT9455	tbh1	14.984	14.026	5.47924	3.49923	-1.98001	0	0.29777	1.04197	-0.589587
00000002_9.tif	control	MT9455	tbh1	16.844	17.016	5.47924	6.7959	1.31666	1	0.29777	2.02361	0.392063
00000002_9.tif	control	MT9455	tbh1	18.318	16.479	5.47924	6.9044	1.42516	1	0.29777	2.05592	0.424371
00000002_9.tif	control	MT9455	tbh1	11.406	11.984	5.47924	3.70298	-1.77626	0	0.29777	1.10264	-0.528917
00000002_9.tif	control	MT9455	tbh1	11.604	12.125	5.47924	3.58219	-1.89704	0	0.29777	1.06667	-0.564883
00000002_9.tif	control	MT9455	tbh1	11.719	12.109	5.47924	3.47228	-2.00696	0	0.29777	1.03394	-0.597611
00000002_9.tif	control	MT9455	tbh1	11.865	11.568	5.47924	3.12413	-2.35511	0	0.29777	0.930272	-0.701281
00000002_9.tif	control	MT9455	tbh1	11.958	11.505	5.47924	3.01562	-2.46361	0	0.29777	0.897963	-0.73359
00000002_9.tif	control	MT9455	tbh1	11.922	11.401	5.47924	3.01811	-2.46112	0	0.29777	0.898703	-0.732849
00000002_9.tif	control	MT9455	tbh1	11.901	11.036	5.47924	2.95448	-2.52476	0	0.29777	0.879755	-0.751797
00000002_9.tif	control	MT9455	tbh1	12.078	10.677	5.47924	2.7379	-2.74134	0	0.29777	0.815263	-0.816289
00000002_9.tif	control	MT9455	tbh1	12.5	10.656	5.47924	2.31538	-3.16386	0	0.29777	0.68945	-0.942103
00000002_9.tif	control	MT9455	tbh1	11.703	10.161	5.47924	3.13094	-2.3483	0	0.29777	0.9323	-0.699252
00000002_9.tif	control	MT9455	tbh1	12.062	11.995	5.47924	3.11541	-2.36382	0	0.29777	0.927676	-0.703876
00000002_9.tif	control	MT9455	tbh1	12.245	11.833	5.47924	2.87831	-2.60092	0	0.29777	0.857076	-0.774477
00000002_9.tif	control	MT9455	tbh1	12.911	12.484	5.47924	2.72544	-2.7538	0	0.29777	0.811554	-0.819999
00000002_9.tif	control	MT9455	tbh1	12.807	12.219	5.47924	2.62095	-2.85829	0	0.29777	0.78044	-0.851113
00000002_9.tif	control	MT9455	tbh1	13.38	12.615	5.47924	2.52857	-2.95066	0	0.29777	0.752933	-0.878619
00000002_9.tif	control	MT9455	tbh1	14.193	12.562	5.47924	2.12323	-3.356	0	0.29777	0.632235	-0.999317
00000002_9.tif	control	MT9455	tbh1	13.849	11.536	5.47924	1.3919	-4.08733	0	0.29777	0.414467	-1.21709
00000002_9.tif	control	MT9455	tbh1	13.729	9.979	5.47924	1.21556	-4.26367	0	0.29777	0.361958	-1.26959
00000002_9.tif	control	MT9455	tbh1	13.953	9.958	5.47924	1.03257	-4.44666	0	0.29777	0.30747	-1.32408
00000002_9.tif	control	MT9455	tbh1	14.057	9.891	5.47924	0.98976	-4.48948	0	0.29777	0.294721	-1.33683
00000002_9.tif	control	MT9455	tbh1	11.333	9.266	5.47924	3.70185	-1.77739	0	0.29777	1.1023	-0.529254
00000002_9.tif	control	MT9455	tbh1	10.25	9.031	5.47924	4.80227	-0.676962	0	0.29777	1.42997	-0.201579
00000002_9.tif	control	MT9455	tbh1	10.323	8.943	5.47924	4.7616	-0.717633	0	0.29777	1.41786	-0.21369
00000002_9.tif	control	MT9455	tbh1	10.427	8.958	5.47924	4.6586	-0.820637	0	0.29777	1.38719	-0.244361
00000002_9.tif	control	MT9455	tbh1	10.266	8.667	5.47924	4.91331	-0.565927	0	0.29777	1.46304	-0.168516
00000002_9.tif	control	MT9455	tbh1	10.594	8.495	5.47924	4.68368	-0.795561	0	0.29777	1.39466	-0.236894
00000002_9.tif	control	MT9455	tbh1	10.88	8.125	5.47924	4.60971	-0.869523	0	0.29777	1.37263	-0.258918
00000002_9.tif	control	MT9455	tbh1	11.151	8.047	5.47924	4.42416	-1.05508	0	0.29777	1.31738	-0.314171
00000002_9.tif	control	MT9455	tbh1	10.88	7.875	5.47924	4.74499	-0.734243	0	0.29777	1.41292	-0.218636
00000002_9.tif	control	MT9455	tbh1	11.021	7.781	5.47924	4.68339	-0.795842	0	0.29777	1.39457	-0.236978
00000002_9.tif	control	MT9455	tbh1	11.349	7.812	5.47924	4.40288	-1.07636	0	0.29777	1.31104	-0.320507
00000002_9.tif	control	MT9455	tbh1	11.417	8.547	5.47924	3.93221	-1.54703	0	0.29777	1.17089	-0.460658
00000002_9.tif	control	MT9455	tbh1	12.036	7.797	5.47924	3.89627	-1.58297	0	0.29777	1.16019	-0.471359
00000002_9.tif	control	MT9455	tbh1	13.859	9.37	5.47924	1.50204	-3.97719	0	0.29777	0.447263	-1.18429
00000002_9.tif	control	MT9455	tbh1	13.557	9.578	5.47924	1.57583	-3.90341	0	0.29777	0.469234	-1.16232
00000002_9.tif	control	MT9455	tbh1	13.599	9.672	5.47924	1.48635	-3.99288	0	0.29777	0.442592	-1.18896
00000002_9.tif	control	MT9455	tbh1	13.958	9.333	5.47924	1.47123	-4.00801	0	0.29777	0.438088	-1.19346
00000002_9.tif	control	MT9455	tbh1	14.276	8.661	5.47924	1.9453	-3.53394	0	0.29777	0.579252	-1.0523
00000002_9.tif	control	MT9455	tbh1	14.604	8.656	5.47924	1.8865	-3.59273	0	0.29777	0.561744	-1.06981
00000002_9.tif	control	MT9455	tbh1	14.573	8.521	5.47924	2.02416	-3.45508	0	0.29777	0.602734	-1.02882
00000002_9.tif	control	MT9455	tbh1	11.052	7.615	5.47924	4.75822	-0.721017	0	0.29777	1.41686	-0.214697
00000002_9.tif	control	MT9455	tbh1	11.359	7.292	5.47924	4.73438	-0.744859	0	0.29777	1.40976	-0.221797
00000002_9.tif	control	MT9455	tbh1	11.625	6.917	5.47924	4.8185	-0.660734	0	0.29777	1.43481	-0.196747
00000002_9.tif	control	MT9455	tbh1	12.464	6.849	5.47924	4.36695	-1.11229	0	0.29777	1.30035	-0.331206
00000002_9.tif	control	MT9455	tbh1	12.75	6.833	5.47924	4.23403	-1.2452	0	0.29777	1.26077	-0.370784
00000002_9.tif	control	MT9455	tbh1	12.469	6.464	5.47924	4.69363	-0.785609	0	0.29777	1.39762	-0.233931
00000002_9.tif	control	MT9455	tbh1	12.578	6.214	5.47924	4.86079	-0.61845	0	0.29777	1.4474	-0.184156
00000002_9.tif	control	MT9455	tbh1	12.516	6.016	5.47924	5.06526	-0.413978	0	0.29777	1.50828	-0.12327
00000002_9.tif	control	MT9455	tbh1	12.641	6.026	5.47924	5.00083	-0.47841	0	0.29777	1.4891	-0.142456
00000002_9.tif	control	MT9455	tbh1	13.125	5.88	5.47924	4.9475	-0.531735	0	0.29777	1.47322	-0.158335
00000002_9.tif	control	MT9455	tbh1	13.948	6.672	5.47924	3.95454	-1.5247	0	0.29777	1.17754	-0.454009
00000002_9.tif	control	MT9455	tbh1	14.219	6.745	5.47924	3.83216	-1.64708	0	0.29777	1.1411	-0.49045
00000002_9.tif	control	MT9455	tbh1	14.505	4.167	5.47924	6.3714	0.892164	1	0.29777	1.89721	0.26566
00000002_9.tif	control	MT9455	tbh1	15.005	5.266	5.47924	5.26854	-0.2107	0	0.29777	1.56881	-0.0627402
00000002_9.tif	control	MT9455	tbh1	15.144	5.189	5.47924	5.35231	-0.12693	0	0.29777	1.59376	-0.0377959
00000002_9.tif	control	MT9455	tbh1	17.214	4.856	5.47924	6.1624	0.683168	1	0.29777	1.83498	0.203427
00000002_9.tif	control	MT9455	tbh1	18.005	5.238	5.47924	6.18151	0.702276	1	0.29777	1.84067	0.209117
00000002_9.tif	control	MT9455	tbh1	18.068	5.182	5.47924	6.26206	0.782819	1	0.29777	1.86465	0.2331
00000002_9.tif	control	MT9455	tbh1	18.227	5.189	5.47924	6.34028	0.861046	1	0.29777	1.88795	0.256394
00000002_9.tif	control	MT9455	tbh1	15.896	5.776	5.47924	4.877	-0.602242	0	0.29777	1.45222	-0.179329
00000002_9.tif	control	MT9455	tbh1	15.802	5.948	5.47924	4.68871	-0.790528	0	0.29777	1.39616	-0.235395
00000002_9.tif	control	MT9455	tbh1	16.432	6.495	5.47924	4.34899	-1.13025	0	0.29777	1.295	-0.336554
00000002_9.tif	control	MT9455	tbh1	16.521	6.453	5.47924	4.42162	-1.05761	0	0.29777	1.31663	-0.314925
00000002_9.tif	control	MT9455	tbh1	18.125	6.63	5.47924	5.11798	-0.361252	0	0.29777	1.52398	-0.10757
00000002_9.tif	control	MT9455	tbh1	15.818	6.724	5.47924	3.93768	-1.54156	0	0.29777	1.17252	-0.459031
00000002_9.tif	control	MT9455	tbh1	15.922	6.771	5.47924	3.92042	-1.55882	0	0.29777	1.16738	-0.464169
00000002_9.tif	control	MT9455	tbh1	15.74	7.516	5.47924	3.15459	-2.32465	0	0.29777	0.939341	-0.692211
00000002_9.tif	control	MT9455	tbh1	15.75	7.656	5.47924	3.02415	-2.45509	0	0.29777	0.9005	-0.731052
00000002_9.tif	control	MT9455	tbh1	15.839	7.568	5.47924	3.13594	-2.3433	0	0.29777	0.933788	-0.697764
00000002_9.tif	control	MT9455	tbh1	15.818	7.849	5.47924	2.86447	-2.61477	0	0.29777	0.852952	-0.778601
00000002_9.tif	control	MT9455	tbh1	15.344	7.875	5.47924	2.70876	-2.77048	0	0.29777	0.806586	-0.824966
00000002_9.tif	control	MT9455	tbh1	14.745	7.583	5.47924	2.94876	-2.53048	0	0.29777	0.878053	-0.7535
00000002_9.tif	control	MT9455	tbh1	14.901	7.562	5.47924	2.97033	-2.5089	0	0.29777	0.884476	-0.747076
00000002_9.tif	control	MT9455	tbh1	15.526	8.078	5.47924	2.5548	-2.92444	0	0.29777	0.760743	-0.870809
00000002_9.tif	control	MT9455	tbh1	16.667	9.135	5.47924	2.3216	-3.15763	0	0.29777	0.691304	-0.940249
00000002_9.tif	control	MT9455	tbh1	17.37	8.849	5.47924	3.06145	-2.41778	0	0.29777	0.911609	-0.719944
00000002_9.tif	control	MT9455	tbh1	17.484	8.849	5.47924	3.15733	-2.32191	0	0.29777	0.940157	-0.691395
00000002_9.tif	control	MT9455	tbh1	17.615	9.135	5.47924	3.13139	-2.34784	0	0.29777	0.932435	-0.699117
00000002_9.tif	control	MT9455	tbh1	15.578	10.047	5.47924	0.906097	-4.57314	0	0.29777	0.269809	-1.36174
00000002_9.tif	control	MT9455	tbh1	15.682	10.062	5.47924	0.988363	-4.49087	0	0.29777	0.294305	-1.33725
00000002_9.tif	control	MT9455	tbh1	15.828	10.073	5.47924	1.11446	-4.36478	0	0.29777	0.331853	-1.2997
00000002_9.tif	control	MT9455	tbh1	16.766	9.979	5.47924	2.03047	-3.44876	0	0.29777	0.604614	-1.02694
00000002_9.tif	control	MT9455	tbh1	16.479	10.453	5.47924	1.66882	-3.81041	0	0.29777	0.496926	-1.13463
00000002_9.tif	control	MT9455	tbh1	16.505	10.536	5.47924	1.69301	-3.78623	0	0.29777	0.504127	-1.12743
00000002_9.tif	control	MT9455	tbh1	16.323	10.745	5.47924	1.52608	-3.95316	0	0.29777	0.454421	-1.17713
00000002_9.tif	control	MT9455	tbh1	16.536	10.932	5.47924	1.77002	-3.70921	0	0.29777	0.527059	-1.10449
00000002_9.tif	control	MT9455	tbh1	16.583	11.005	5.47924	1.83333	-3.6459	0	0.29777	0.545912	-1.08564
00000002_9.tif	control	MT9455	tbh1	16.792	10.859	5.47924	2.00698	-3.47225	0	0.29777	0.59762	-1.03393
00000002_9.tif	control	MT9455	tbh1	16.396	11.141	5.47924	1.6974	-3.78184	0	0.29777	0.505434	-1.12612
00000002_9.tif	control	MT9455	tbh1	16.51	11.375	5.47924	1.89619	-3.58305	0	0.29777	0.564629	-1.06692
00000002_9.tif	control	MT9455	tbh1	16.125	11.448	5.47924	1.60152	-3.87772	0	0.29777	0.476884	-1.15467
00000002_9.tif	control	MT9455	tbh1	16.24	11.5	5.47924	1.72573	-3.75351	0	0.29777	0.513871	-1.11768
00000002_9.tif	control	MT9455	tbh1	16.073	11.344	5.47924	1.50036	-3.97887	0	0.29777	0.446763	-1.18479
00000002_9.tif	control	MT9455	tbh1	15.979	11.125	5.47924	1.30948	-4.16976	0	0.29777	0.389922	-1.24163
00000002_9.tif	control	MT9455	tbh1	15.536	12.88	5.47924	2.45804	-3.02119	0	0.29777	0.731932	-0.899621
00000002_9.tif	control	MT9455	tbh1	16.656	13.516	5.47924	3.50864	-1.9706	0	0.29777	1.04477	-0.586784
00000002_9.tif	control	MT9455	tbh1	16.724	13.391	5.47924	3.44025	-2.03898	0	0.29777	1.0244	-0.607148
00000002_9.tif	control	MT9455	tbh1	17.198	11.833	5.47924	2.71812	-2.76111	0	0.29777	0.809376	-0.822176
00000002_9.tif	control	MT9455	tbh1	18.333	13.323	5.47924	4.49363	-0.985607	0	0.29777	1.33807	-0.293484
00000002_9.tif	control	MT9455	tbh1	18.786	12.641	5.47924	4.49942	-0.979817	0	0.29777	1.33979	-0.29176
00000002_9.tif	control	MT9455	tbh1	18.828	12.547	5.47924	4.49361	-0.985629	0	0.29777	1.33806	-0.293491
00000002_9.tif	control	MT9455	tbh1	18.854	12.464	5.47924	4.48043	-0.998807	0	0.29777	1.33414	-0.297415
00000002_9.tif	control	MT9455	tbh1	16.089	14.609	5.47924	4.27327	-1.20597	0	0.29777	1.27245	-0.359101
00000002_9.tif	control	MT9455	tbh1	16.161	14.87	5.47924	4.54387	-0.93537	0	0.29777	1.35303	-0.278525
00000002_9.tif	control	MT9455	tbh1	17.396	14.339	5.47924	4.60195	-0.877289	0	0.29777	1.37032	-0.26123
00000002_9.tif	control	MT9455	tbh1	17.594	14.344	5.47924	4.72001	-0.759227	0	0.29777	1.40548	-0.226075
00000002_9.tif	control	MT9455	tbh1	17.844	14.333	5.47924	4.86294	-0.616292	0	0.29777	1.44804	-0.183513
00000002_9.tif	control	MT9455	tbh1	20.13	12.786	5.47924	5.77634	0.297107	1	0.29777	1.72002	0.0884696
00000002_9.tif	control	MT9455	tbh1	20.234	12.092	5.47924	5.64223	0.162997	1	0.29777	1.68009	0.0485358
00000002_9.tif	control	MT9455	tbh1	20.568	12.293	5.47924	6.01965	0.540413	1	0.29777	1.79247	0.160919
00000002_9.tif	control	MT9455	tbh1	20.616	12.342	5.47924	6.07998	0.600742	1	0.29777	1.81044	0.178883
00000002_9.tif	control	MT9455	tbh1	19.734	11.418	5.47924	5.00129	-0.477951	0	0.29777	1.48923	-0.14232
00000002_9.tif	control	MT9455	tbh1	19.783	11.259	5.47924	5.02402	-0.455212	0	0.29777	1.496	-0.135548
00000002_9.tif	control	MT9455	tbh1	19.707	11.203	5.47924	4.94091	-0.538325	0	0.29777	1.47126	-0.160297
00000002_9.tif	control	MT9455	tbh1	20.005	11.217	5.47924	5.23811	-0.241122	0	0.29777	1.55975	-0.0717989
00000002_9.tif	control	MT9455	tbh1	19.623	10.835	5.47924	4.8206	-0.658641	0	0.29777	1.43543	-0.196124
00000002_9.tif	control	MT9455	tbh1	19.47	10.481	5.47924	4.65827	-0.820968	0	0.29777	1.38709	-0.24446
00000002_9.tif	control	MT9455	tbh1	19.526	10.342	5.47924	4.71779	-0.761449	0	0.29777	1.40482	-0.226737
00000002_9.tif	control	MT9455	tbh1	19.102	10.46	5.47924	4.29059	-1.18865	0	0.29777	1.27761	-0.353944
00000002_9.tif	control	MT9455	tbh1	18.595	10.21	5.47924	3.79659	-1.68264	0	0.29777	1.13051	-0.50104
00000002_9.tif	control	MT9455	tbh1	18.123	10.293	5.47924	3.31954	-2.15969	0	0.29777	0.98846	-0.643092
00000002_9.tif	control	MT9455	tbh1	18.13	10.411	5.47924	3.32017	-2.15907	0	0.29777	0.988647	-0.642905
00000002_9.tif	control	MT9455	tbh1	18.505	9.71	5.47924	3.78316	-1.69608	0	0.29777	1.12651	-0.505041
00000002_9.tif	control	MT9455	tbh1	20.984	11.099	5.47924	6.19808	0.718844	1	0.29777	1.8456	0.21405
00000002_9.tif	control	MT9455	tbh1	20.63	10.675	5.47924	5.81978	0.340545	1	0.29777	1.73296	0.101404
00000002_9.tif	control	MT9455	tbh1	21.63	10.453	5.47924	6.81845	1.33921	1	0.29777	2.03033	0.398776
00000002_9.tif	control	MT9455	tbh1	20.797	9.717	5.47924	6.0401	0.560864	1	0.29777	1.79856	0.167009
00000002_9.tif	control	MT9455	tbh1	18.137	9.648	5.47924	3.44025	-2.03899	0	0.29777	1.0244	-0.607149
00000002_9.tif	control	MT9455	tbh1	18.498	9.571	5.47924	3.80896	-1.67027	0	0.29777	1.13419	-0.497357
00000002_9.tif	control	MT9455	tbh1	17.901	9.148	5.47924	3.38447	-2.09477	0	0.29777	1.00779	-0.62376
00000002_9.tif	control	MT9455	tbh1	17.845	9.05	5.47924	3.37527	-2.10397	0	0.29777	1.00505	-0.626498
00000002_9.tif	control	MT9455	tbh1	18.109	9.057	5.47924	3.61149	-1.86774	0	0.29777	1.07539	-0.556158
00000002_9.tif	control	MT9455	tbh1	18.714	8.627	5.47924	4.34175	-1.13748	0	0.29777	1.29284	-0.338708
00000002_9.tif	control	MT9455	tbh1	18.97	8.557	5.47924	4.60279	-0.87645	0	0.29777	1.37057	-0.260981
00000002_9.tif	control	MT9455	tbh1	19.033	8.821	5.47924	4.55422	-0.925014	0	0.29777	1.35611	-0.275441
00000002_9.tif	control	MT9455	tbh1	20.491	8.974	5.47924	5.88857	0.409336	1	0.29777	1.75344	0.121888
00000002_9.tif	control	MT9455	tbh1	19.595	8.384	5.47924	5.24278	-0.236461	0	0.29777	1.56114	-0.0704109
00000002_9.tif	control	MT9455	tbh1	19.991	8.405	5.47924	5.59839	0.119149	1	0.29777	1.66703	0.0354789
00000002_9.tif	control	MT9455	tbh1	19.825	8.023	5.47924	5.60538	0.126139	1	0.29777	1.66911	0.0375603
00000002_9.tif	control	MT9455	tbh1	19.755	7.96	5.47924	5.57165	0.092414	1	0.29777	1.65907	0.0275181
00000002_9.tif	control	MT9455	tbh1	19.741	7.8	5.47924	5.63502	0.155779	1	0.29777	1.67794	0.0463863
00000002_9.tif	control	MT9455	tbh1	18.547	7.911	5.47924	4.5623	-0.916932	0	0.29777	1.35852	-0.273035
00000002_9.tif	control	MT9455	tbh1	18.845	7.905	5.47924	4.81258	-0.666653	0	0.29777	1.43304	-0.198509
00000002_9.tif	control	MT9455	tbh1	18.776	7.71	5.47924	4.86532	-0.613917	0	0.29777	1.44875	-0.182806
00000002_9.tif	control	MT9455	tbh1	19.2	7.286	5.47924	5.45752	-0.0217125	0	0.29777	1.62509	-0.00646533
00000002_9.tif	control	MT9455	tbh1	18.234	6.609	5.47924	5.20501	-0.274223	0	0.29777	1.5499	-0.0816553
00000002_9.tif	control	MT9455	tbh1	18.526	6.484	5.47924	5.4929	0.0136684	1	0.29777	1.63562	0.00407003
00000002_9.tif	control	MT9455	tbh1	18.693	6.519	5.47924	5.58196	0.102726	1	0.29777	1.66214	0.0305887
00000002_9.tif	control	MT9455	tbh1	18.29	6.227	5.47924	5.53362	0.0543789	1	0.29777	1.64774	0.0161924
00000005_4.tif	predator	MT13113	tdc1	7.75	4.927	4.90112	9.88812	4.987	1	0.29777	2.94438	1.48498
00000005_4.tif	predator	MT13113	tdc1	7.967	5.078	4.90112	9.62379	4.72267	1	0.29777	2.86568	1.40627
00000005_4.tif	predator	MT13113	tdc1	9.766	3.408	4.90112	9.36759	4.46648	1	0.29777	2.78939	1.32998
00000005_4.tif	predator	MT13113	tdc1	10.113	6.696	4.90112	6.94204	2.04092	1	0.29777	2.06713	0.607725
00000005_4.tif	predator	MT13113	tdc1	8.252	7.356	4.90112	8.30281	3.4017	1	0.29777	2.47233	1.01292
00000005_4.tif	predator	MT13113	tdc1	5.373	10.519	4.90112	10.5914	5.69024	1	0.29777	3.15379	1.69438
00000005_4.tif	predator	MT13113	tdc1	5.88	10.859	4.90112	10.093	5.19192	1	0.29777	3.0054	1.546
00000005_4.tif	predator	MT13113	tdc1	6.172	11.186	4.90112	9.82099	4.91987	1	0.29777	2.9244	1.46499
00000005_4.tif	predator	MT13113	tdc1	6.79	11.748	4.90112	9.26791	4.36679	1	0.29777	2.75971	1.3003
00000005_4.tif	predator	MT13113	tdc1	6.297	13.984	4.90112	10.2989	5.3978	1	0.29777	3.06671	1.6073
00000005_4.tif	predator	MT13113	tdc1	7.599	12.839	4.90112	8.70442	3.8033	1	0.29777	2.59191	1.13251
00000005_4.tif	predator	MT13113	tdc1	8.516	17.727	4.90112	10.4254	5.52432	1	0.29777	3.10438	1.64498
00000005_4.tif	predator	MT13113	tdc1	9.655	19.477	4.90112	11.0279	6.12683	1	0.29777	3.28379	1.82439
00000005_4.tif	predator	MT13113	tdc1	9.918	20.172	4.90112	11.4639	6.56282	1	0.29777	3.41361	1.95421
00000005_4.tif	predator	MT13113	tdc1	10.898	19.269	4.90112	10.1861	5.285	1	0.29777	3.03312	1.57371
00000005_4.tif	predator	MT13113	tdc1	11.043	19.005	4.90112	9.88497	4.98385	1	0.29777	2.94345	1.48404
00000005_4.tif	predator	MT13113	tdc1	10.828	18.012	4.90112	9.15614	4.25502	1	0.29777	2.72642	1.26702
00000005_4.tif	predator	MT13113	tdc1	14.599	20.255	4.90112	9.91739	5.01627	1	0.29777	2.9531	1.49369
00000005_4.tif	predator	MT13113	tdc1	15.755	19.13	4.90112	8.70051	3.79939	1	0.29777	2.59075	1.13135
00000005_4.tif	predator	MT13113	tdc1	15.536	19.005	4.90112	8.58368	3.68256	1	0.29777	2.55596	1.09656
00000005_4.tif	predator	MT13113	tdc1	11.734	15.641	4.90112	6.71018	1.80907	1	0.29777	1.99809	0.538686
00000005_4.tif	predator	MT13113	tdc1	11.943	15.422	4.90112	6.40847	1.50736	1	0.29777	1.90825	0.448846
00000005_4.tif	predator	MT13113	tdc1	12.969	12.349	4.90112	3.55597	-1.34515	0	0.29777	1.05886	-0.400544
00000005_4.tif	predator	MT13113	tdc1	12.698	11.734	4.90112	3.51596	-1.38516	0	0.29777	1.04695	-0.412459
00000005_4.tif	predator	MT13113	tdc1	12.094	11.63	4.90112	4.05119	-0.84993	0	0.29777	1.20632	-0.253084
00000005_4.tif	predator	MT13113	tdc1	12.224	11.552	4.90112	3.9041	-0.997016	0	0.29777	1.16252	-0.296881
00000005_4.tif	predator	MT13113	tdc1	12.083	11.521	4.90112	4.03089	-0.870225	0	0.29777	1.20028	-0.259127
00000005_4.tif	predator	MT13113	tdc1	11.724	11.427	4.90112	4.35518	-0.545932	0	0.29777	1.29684	-0.162562
00000005_4.tif	predator	MT13113	tdc1	12.391	11.099	4.90112	3.63472	-1.26639	0	0.29777	1.08231	-0.377094
00000005_4.tif	predator	MT13113	tdc1	12.568	11.062	4.90112	3.45394	-1.44717	0	0.29777	1.02848	-0.430925
00000005_4.tif	predator	MT13113	tdc1	13.854	10.646	4.90112	2.12082	-2.78029	0	0.29777	0.631518	-0.827887
00000005_4.tif	predator	MT13113	tdc1	11.896	10.172	4.90112	4.0763	-0.824816	0	0.29777	1.2138	-0.245605
00000005_4.tif	predator	MT13113	tdc1	11.552	10.062	4.90112	4.42749	-0.473629	0	0.29777	1.31837	-0.141032
00000005_4.tif	predator	MT13113	tdc1	10.948	8.474	4.90112	5.38461	0.483494	1	0.29777	1.60338	0.14397
00000005_4.tif	predator	MT13113	tdc1	11.365	8.51	4.90112	4.98446	0.0833484	1	0.29777	1.48422	0.0248187
00000005_4.tif	predator	MT13113	tdc1	11.438	8.938	4.90112	4.76621	-0.134911	0	0.29777	1.41923	-0.0401724
00000005_4.tif	predator	MT13113	tdc1	11.495	9.026	4.90112	4.68495	-0.216162	0	0.29777	1.39504	-0.0643664
00000005_4.tif	predator	MT13113	tdc1	11.594	9.349	4.90112	4.5022	-0.398918	0	0.29777	1.34062	-0.118786
00000005_4.tif	predator	MT13113	tdc1	11.714	9.135	4.90112	4.4435	-0.457614	0	0.29777	1.32314	-0.136264
00000005_4.tif	predator	MT13113	tdc1	11.948	9.24	4.90112	4.18917	-0.711949	0	0.29777	1.24741	-0.211997
00000005_4.tif	predator	MT13113	tdc1	11.828	8.354	4.90112	4.62867	-0.272447	0	0.29777	1.37828	-0.0811264
00000005_4.tif	predator	MT13113	tdc1	12.63	5.099	4.90112	6.28939	1.38828	1	0.29777	1.87279	0.413387
00000005_4.tif	predator	MT13113	tdc1	12.427	4.406	4.90112	6.98735	2.08623	1	0.29777	2.08062	0.621218
00000005_4.tif	predator	MT13113	tdc1	15.047	3.161	4.90112	7.3286	2.42748	1	0.29777	2.18224	0.722831
00000005_4.tif	predator	MT13113	tdc1	15.901	2.667	4.90112	7.76526	2.86414	1	0.29777	2.31226	0.852855
00000005_4.tif	predator	MT13113	tdc1	16.266	2.714	4.90112	7.72391	2.82279	1	0.29777	2.29995	0.840542
00000005_4.tif	predator	MT13113	tdc1	16.604	3.26	4.90112	7.2005	2.29938	1	0.29777	2.14409	0.684687
00000005_4.tif	predator	MT13113	tdc1	15.682	6.354	4.90112	4.08774	-0.813377	0	0.29777	1.21721	-0.242199
00000005_4.tif	predator	MT13113	tdc1	15.833	6.146	4.90112	4.288	-0.613114	0	0.29777	1.27684	-0.182567
00000005_4.tif	predator	MT13113	tdc1	14.234	6.641	4.90112	4.16708	-0.734033	0	0.29777	1.24083	-0.218573
00000005_4.tif	predator	MT13113	tdc1	14.969	7.292	4.90112	3.29388	-1.60724	0	0.29777	0.980818	-0.478588
00000005_4.tif	predator	MT13113	tdc1	15.146	7.458	4.90112	3.08444	-1.81667	0	0.29777	0.918455	-0.54095
00000005_4.tif	predator	MT13113	tdc1	15.115	7.573	4.90112	2.9824	-1.91872	0	0.29777	0.888068	-0.571337
00000005_4.tif	predator	MT13113	tdc1	17.698	6.99	4.90112	3.8541	-1.04701	0	0.29777	1.14764	-0.311769
00000005_4.tif	predator	MT13113	tdc1	16.005	7.87	4.90112	2.56233	-2.33879	0	0.29777	0.762984	-0.696421
00000005_4.tif	predator	MT13113	tdc1	15.609	8.036	4.90112	2.42216	-2.47896	0	0.29777	0.721245	-0.73816
00000005_4.tif	predator	MT13113	tdc1	15.406	8.286	4.90112	2.21736	-2.68376	0	0.29777	0.660263	-0.799142
00000005_4.tif	predator	MT13113	tdc1	14.953	9.24	4.90112	1.56301	-3.33811	0	0.29777	0.465416	-0.993989
00000005_4.tif	predator	MT13113	tdc1	16.516	9.104	4.90112	1.43815	-3.46296	0	0.29777	0.428239	-1.03117
00000005_4.tif	predator	MT13113	tdc1	13.943	10.177	4.90112	2.03702	-2.86409	0	0.29777	0.606565	-0.852841
00000005_4.tif	predator	MT13113	tdc1	14.115	10.578	4.90112	1.85476	-3.04636	0	0.29777	0.55229	-0.907115
00000005_4.tif	predator	MT13113	tdc1	15.104	10.396	4.90112	0.860753	-4.04036	0	0.29777	0.256306	-1.2031
00000005_4.tif	predator	MT13113	tdc1	15.542	11.51	4.90112	1.15766	-3.74346	0	0.29777	0.344715	-1.11469
00000005_4.tif	predator	MT13113	tdc1	15.63	12.156	4.90112	1.75606	-3.14506	0	0.29777	0.522901	-0.936505
00000005_4.tif	predator	MT13113	tdc1	17.818	11.927	4.90112	2.38167	-2.51945	0	0.29777	0.709189	-0.750216
00000005_4.tif	predator	MT13113	tdc1	17.688	10.094	4.90112	1.75682	-3.14429	0	0.29777	0.523129	-0.936277
00000005_4.tif	predator	MT13113	tdc1	15.266	13.167	4.90112	2.82266	-2.07845	0	0.29777	0.840504	-0.618901
00000005_4.tif	predator	MT13113	tdc1	16.016	13.474	4.90112	3.04244	-1.85867	0	0.29777	0.905949	-0.553457
00000005_4.tif	predator	MT13113	tdc1	16.083	13.708	4.90112	3.27816	-1.62296	0	0.29777	0.976138	-0.483267
00000005_4.tif	predator	MT13113	tdc1	14.703	14.755	4.90112	4.50316	-0.397956	0	0.29777	1.34091	-0.118499
00000005_4.tif	predator	MT13113	tdc1	14.839	14.807	4.90112	4.51733	-0.383788	0	0.29777	1.34512	-0.114281
00000005_4.tif	predator	MT13113	tdc1	14.969	15.036	4.90112	4.71029	-0.190825	0	0.29777	1.40258	-0.0568219
00000005_4.tif	predator	MT13113	tdc1	16.005	14.969	4.90112	4.53719	-0.363931	0	0.29777	1.35104	-0.108368
00000005_4.tif	predator	MT13113	tdc1	16.901	15.104	4.90112	4.76503	-0.136082	0	0.29777	1.41888	-0.040521
00000005_4.tif	predator	MT13113	tdc1	17.391	15.104	4.90112	4.88507	-0.0160455	0	0.29777	1.45463	-0.00477787
00000005_4.tif	predator	MT13113	tdc1	16.141	19.573	4.90112	9.14271	4.2416	1	0.29777	2.72243	1.26302
00000005_4.tif	predator	MT13113	tdc1	19.667	19.661	4.90112	9.94418	5.04306	1	0.29777	2.96108	1.50167
00000005_4.tif	predator	MT13113	tdc1	16.568	18.156	4.90112	7.74758	2.84646	1	0.29777	2.307	0.847592
00000005_4.tif	predator	MT13113	tdc1	17	17.943	4.90112	7.58211	2.681	1	0.29777	2.25773	0.79832
00000005_4.tif	predator	MT13113	tdc1	18.839	18.255	4.90112	8.33456	3.43345	1	0.29777	2.48178	1.02238
00000005_4.tif	predator	MT13113	tdc1	18.568	18.109	4.90112	8.10661	3.2055	1	0.29777	2.41391	0.9545
00000005_4.tif	predator	MT13113	tdc1	19.536	17.594	4.90112	8.00334	3.10222	1	0.29777	2.38315	0.923749
00000005_4.tif	predator	MT13113	tdc1	18.635	16.589	4.90112	6.7114	1.81028	1	0.29777	1.99845	0.539048
00000005_4.tif	predator	MT13113	tdc1	18.318	14.057	4.90112	4.32226	-0.578855	0	0.29777	1.28704	-0.172366
00000005_4.tif	predator	MT13113	tdc1	19.698	13.495	4.90112	4.82957	-0.0715481	0	0.29777	1.4381	-0.0213049
00000005_4.tif	predator	MT13113	tdc1	18.87	12.797	4.90112	3.74674	-1.15438	0	0.29777	1.11567	-0.343739
00000005_4.tif	predator	MT13113	tdc1	18.984	12.698	4.90112	3.7756	-1.12552	0	0.29777	1.12426	-0.335145
00000005_4.tif	predator	MT13113	tdc1	18.047	9.448	4.90112	2.30372	-2.59739	0	0.29777	0.68598	-0.773425
00000005_4.tif	predator	MT13113	tdc1	19.688	9.161	4.90112	3.93492	-0.966193	0	0.29777	1.1717	-0.287703
00000005_4.tif	predator	MT13113	tdc1	19.938	8.812	4.90112	4.29151	-0.609604	0	0.29777	1.27788	-0.181522
00000005_4.tif	predator	MT13113	tdc1	19.448	8.245	4.90112	4.11354	-0.787574	0	0.29777	1.22489	-0.234516
00000005_4.tif	predator	MT13113	tdc1	18.938	7.885	4.90112	3.9156	-0.985521	0	0.29777	1.16595	-0.293459
00000005_4.tif	predator	MT13113	tdc1	19.896	7.521	4.90112	4.89229	-0.00882147	0	0.29777	1.45678	-0.00262677
00000005_4.tif	predator	MT13113	tdc1	19.141	3.328	4.90112	7.78204	2.88092	1	0.29777	2.31726	0.857853
00000005_4.tif	predator	MT13113	tdc1	20.438	7.438	4.90112	5.38337	0.482258	1	0.29777	1.60301	0.143602
00000005_4.tif	predator	MT13113	tdc1	21.214	7.87	4.90112	5.84178	0.94066	1	0.29777	1.73951	0.2801
00000005_4.tif	predator	MT13113	tdc1	21.307	7.818	4.90112	5.94816	1.04705	1	0.29777	1.77118	0.311779
00000005_4.tif	predator	MT13113	tdc1	21.229	8.073	4.90112	5.76932	0.868209	1	0.29777	1.71793	0.258526
00000005_4.tif	predator	MT13113	tdc1	21.026	8.411	4.90112	5.45053	0.549415	1	0.29777	1.623	0.163599
00000005_4.tif	predator	MT13113	tdc1	20.328	10.458	4.90112	4.36408	-0.537038	0	0.29777	1.29949	-0.159914
00000005_4.tif	predator	MT13113	tdc1	20.688	10.297	4.90112	4.72593	-0.175187	0	0.29777	1.40724	-0.0521655
00000005_4.tif	predator	MT13113	tdc1	21.635	10.297	4.90112	5.67261	0.771491	1	0.29777	1.68913	0.229727
00000005_4.tif	predator	MT13113	tdc1	22.714	10.146	4.90112	6.75606	1.85494	1	0.29777	2.01175	0.552346
00000005_4.tif	predator	MT13113	tdc1	20.094	13.443	4.90112	5.11107	0.209953	1	0.29777	1.52192	0.0625176
00000005_4.tif	predator	MT13113	tdc1	21.365	13.724	4.90112	6.32519	1.42408	1	0.29777	1.88345	0.424047
00000005_4.tif	predator	MT13113	tdc1	21.292	14.479	4.90112	6.69072	1.78961	1	0.29777	1.9923	0.532892
00000005_4.tif	predator	MT13113	tdc1	24.168	11.036	4.90112	8.2262	3.32509	1	0.29777	2.44952	0.990111
00000005_4.tif	predator	MT13113	tdc1	24.349	11.078	4.90112	8.40985	3.50873	1	0.29777	2.5042	1.0448
00000007_6.tif	control	MT15434	tph1	11.823	16.24	5.55731	4.89975	-0.657565	0	0.29777	1.459	-0.195803
00000007_6.tif	control	MT15434	tph1	11.898	16.2	5.55731	4.82415	-0.733163	0	0.29777	1.43649	-0.218314
00000007_6.tif	control	MT15434	tph1	12.148	15.95	5.55731	4.47699	-1.08032	0	0.29777	1.33311	-0.321688
00000007_6.tif	control	MT15434	tph1	13.127	17.2	5.55731	5.19804	-0.359274	0	0.29777	1.54782	-0.106981
00000007_6.tif	control	MT15434	tph1	12.78	16.359	5.55731	4.52998	-1.02733	0	0.29777	1.34889	-0.305908
00000007_6.tif	control	MT15434	tph1	13.523	16.547	5.55731	4.46249	-1.09482	0	0.29777	1.32879	-0.326006
00000007_6.tif	control	MT15434	tph1	13.411	16.109	5.55731	4.07175	-1.48556	0	0.29777	1.21245	-0.442354
00000007_6.tif	control	MT15434	tph1	12.905	15.63	5.55731	3.81791	-1.7394	0	0.29777	1.13686	-0.51794
00000007_6.tif	control	MT15434	tph1	12.564	15.498	5.55731	3.87136	-1.68595	0	0.29777	1.15278	-0.502025
00000007_6.tif	control	MT15434	tph1	13.786	15.144	5.55731	3.03953	-2.51778	0	0.29777	0.905081	-0.74972
00000007_6.tif	control	MT15434	tph1	12.953	14.526	5.55731	2.84808	-2.70924	0	0.29777	0.848071	-0.806729
00000007_6.tif	control	MT15434	tph1	12.641	14.38	5.55731	2.93334	-2.62397	0	0.29777	0.873459	-0.781341
00000007_6.tif	control	MT15434	tph1	10.953	15.22	5.55731	4.74303	-0.814279	0	0.29777	1.41233	-0.242468
00000007_6.tif	control	MT15434	tph1	10.981	14.915	5.55731	4.53395	-1.02336	0	0.29777	1.35007	-0.304727
00000007_6.tif	control	MT15434	tph1	11.127	14.47	5.55731	4.16119	-1.39612	0	0.29777	1.23908	-0.415722
00000007_6.tif	control	MT15434	tph1	11.328	14.498	5.55731	4.00927	-1.54804	0	0.29777	1.19384	-0.460959
00000007_6.tif	control	MT15434	tph1	11.46	14.609	5.55731	3.967	-1.59031	0	0.29777	1.18125	-0.473545
00000007_6.tif	control	MT15434	tph1	10.432	14.387	5.55731	4.72248	-0.834835	0	0.29777	1.40621	-0.248589
00000007_6.tif	control	MT15434	tph1	10.571	14.151	5.55731	4.4932	-1.06411	0	0.29777	1.33794	-0.316861
00000007_6.tif	control	MT15434	tph1	10.696	14.144	5.55731	4.37753	-1.17978	0	0.29777	1.3035	-0.351304
00000007_6.tif	control	MT15434	tph1	10.217	14.13	5.55731	4.80702	-0.750294	0	0.29777	1.43139	-0.223415
00000007_6.tif	control	MT15434	tph1	9.453	13.241	5.55731	5.27595	-0.281363	0	0.29777	1.57102	-0.0837815
00000007_6.tif	control	MT15434	tph1	9.731	13.13	5.55731	4.98207	-0.575239	0	0.29777	1.48351	-0.171289
00000007_6.tif	control	MT15434	tph1	10.057	13.095	5.55731	4.65521	-0.902101	0	0.29777	1.38618	-0.268619
00000007_6.tif	control	MT15434	tph1	10.8	13.859	5.55731	4.16439	-1.39292	0	0.29777	1.24003	-0.414771
00000007_6.tif	control	MT15434	tph1	10.967	13.609	5.55731	3.91609	-1.64122	0	0.29777	1.1661	-0.488705
00000007_6.tif	control	MT15434	tph1	11.168	13.755	5.55731	3.78542	-1.77189	0	0.29777	1.12718	-0.527616
00000007_6.tif	control	MT15434	tph1	12.273	13.589	5.55731	2.72372	-2.83359	0	0.29777	0.811043	-0.843757
00000007_6.tif	control	MT15434	tph1	12.405	13.491	5.55731	2.56045	-2.99686	0	0.29777	0.762426	-0.892375
00000007_6.tif	control	MT15434	tph1	12.099	13.345	5.55731	2.76814	-2.78917	0	0.29777	0.824269	-0.830531
00000007_6.tif	control	MT15434	tph1	12.967	13.2	5.55731	1.92825	-3.62906	0	0.29777	0.574175	-1.08063
00000007_6.tif	control	MT15434	tph1	13.786	13.033	5.55731	1.16911	-4.3882	0	0.29777	0.348126	-1.30667
00000007_6.tif	control	MT15434	tph1	9.502	11.859	5.55731	5.14097	-0.416337	0	0.29777	1.53083	-0.123973
00000007_6.tif	control	MT15434	tph1	9.55	11.748	5.55731	5.10225	-0.455058	0	0.29777	1.5193	-0.135503
00000007_6.tif	control	MT15434	tph1	9.849	12.026	5.55731	4.7851	-0.772212	0	0.29777	1.42486	-0.229942
00000007_6.tif	control	MT15434	tph1	10.286	12.464	5.55731	4.35062	-1.20669	0	0.29777	1.29549	-0.359315
00000007_6.tif	control	MT15434	tph1	12.564	11.915	5.55731	2.08898	-3.46833	0	0.29777	0.622036	-1.03276
00000007_6.tif	control	MT15434	tph1	11.87	11.248	5.55731	2.92749	-2.62982	0	0.29777	0.871718	-0.783083
00000007_6.tif	control	MT15434	tph1	10.738	10.345	5.55731	4.32184	-1.23547	0	0.29777	1.28691	-0.367886
00000007_6.tif	control	MT15434	tph1	10.974	10.311	5.55731	4.12625	-1.43106	0	0.29777	1.22867	-0.426128
00000007_6.tif	control	MT15434	tph1	11.224	10.505	5.55731	3.81521	-1.7421	0	0.29777	1.13605	-0.518746
00000007_6.tif	control	MT15434	tph1	11.696	10.248	5.55731	3.53736	-2.01995	0	0.29777	1.05332	-0.60148
00000007_6.tif	control	MT15434	tph1	11.12	9.665	5.55731	4.3438	-1.21351	0	0.29777	1.29345	-0.361348
00000007_6.tif	control	MT15434	tph1	11.682	9.477	5.55731	4.02948	-1.52783	0	0.29777	1.19986	-0.454942
00000007_6.tif	control	MT15434	tph1	11.689	9.304	5.55731	4.14438	-1.41293	0	0.29777	1.23407	-0.420728
00000007_6.tif	control	MT15434	tph1	11.828	9.575	5.55731	3.85596	-1.70135	0	0.29777	1.14819	-0.506612
00000007_6.tif	control	MT15434	tph1	12.356	8.991	5.55731	3.95264	-1.60467	0	0.29777	1.17698	-0.477823
00000007_6.tif	control	MT15434	tph1	12.377	8.832	5.55731	4.07206	-1.48525	0	0.29777	1.21254	-0.442263
00000007_6.tif	control	MT15434	tph1	12.981	9.339	5.55731	3.32301	-2.2343	0	0.29777	0.989494	-0.665306
00000007_6.tif	control	MT15434	tph1	13.807	8.943	5.55731	3.38265	-2.17466	0	0.29777	1.00725	-0.64755
00000007_6.tif	control	MT15434	tph1	14.613	7.703	5.55731	4.52103	-1.03628	0	0.29777	1.34623	-0.308573
00000007_6.tif	control	MT15434	tph1	13.918	9.37	5.55731	2.94147	-2.61584	0	0.29777	0.875882	-0.778918
00000007_6.tif	control	MT15434	tph1	15.585	8.405	5.55731	3.9366	-1.62071	0	0.29777	1.1722	-0.4826
00000007_6.tif	control	MT15434	tph1	16.092	8.259	5.55731	4.22595	-1.33136	0	0.29777	1.25836	-0.396439
00000007_6.tif	control	MT15434	tph1	16.481	8.016	5.55731	4.59711	-0.960195	0	0.29777	1.36888	-0.285917
00000007_6.tif	control	MT15434	tph1	16.599	8.474	5.55731	4.2355	-1.32181	0	0.29777	1.2612	-0.393595
00000007_6.tif	control	MT15434	tph1	16.488	7.446	5.55731	5.12654	-0.430767	0	0.29777	1.52653	-0.128269
00000007_6.tif	control	MT15434	tph1	17.884	8.328	5.55731	5.07615	-0.481157	0	0.29777	1.51153	-0.143274
00000007_6.tif	control	MT15434	tph1	17.884	8.571	5.55731	4.89213	-0.665181	0	0.29777	1.45673	-0.198071
00000007_6.tif	control	MT15434	tph1	14.189	10.318	5.55731	1.95635	-3.60096	0	0.29777	0.582543	-1.07226
00000007_6.tif	control	MT15434	tph1	15.342	10.172	5.55731	2.17201	-3.3853	0	0.29777	0.646761	-1.00804
00000007_6.tif	control	MT15434	tph1	16.543	10.193	5.55731	2.79008	-2.76723	0	0.29777	0.830801	-0.823999
00000007_6.tif	control	MT15434	tph1	16.627	10.325	5.55731	2.75576	-2.80155	0	0.29777	0.820582	-0.834218
00000007_6.tif	control	MT15434	tph1	16.766	10.595	5.55731	2.68629	-2.87102	0	0.29777	0.799896	-0.854905
00000007_6.tif	control	MT15434	tph1	16.71	10.769	5.55731	2.53839	-3.01892	0	0.29777	0.755856	-0.898944
00000007_6.tif	control	MT15434	tph1	15.196	12.141	5.55731	0.572053	-4.98526	0	0.29777	0.17034	-1.48446
00000007_6.tif	control	MT15434	tph1	15.453	11.87	5.55731	0.895905	-4.66141	0	0.29777	0.266774	-1.38803
00000007_6.tif	control	MT15434	tph1	16.016	11.898	5.55731	1.42382	-4.13349	0	0.29777	0.423972	-1.23083
00000007_6.tif	control	MT15434	tph1	16.071	12.002	5.55731	1.458	-4.09931	0	0.29777	0.434149	-1.22065
00000007_6.tif	control	MT15434	tph1	16.28	11.641	5.55731	1.74997	-3.80734	0	0.29777	0.521088	-1.13371
00000007_6.tif	control	MT15434	tph1	16.634	11.446	5.55731	2.14972	-3.40759	0	0.29777	0.640122	-1.01468
00000007_6.tif	control	MT15434	tph1	16.995	11.411	5.55731	2.50084	-3.05647	0	0.29777	0.744675	-0.910126
00000007_6.tif	control	MT15434	tph1	17.134	11.807	5.55731	2.53848	-3.01883	0	0.29777	0.755885	-0.898916
00000007_6.tif	control	MT15434	tph1	17.8	12.259	5.55731	3.17019	-2.38712	0	0.29777	0.943988	-0.710812
00000007_6.tif	control	MT15434	tph1	13.828	13.734	5.55731	1.70977	-3.84754	0	0.29777	0.509117	-1.14568
00000007_6.tif	control	MT15434	tph1	13.932	14.165	5.55731	2.06269	-3.49462	0	0.29777	0.614207	-1.04059
00000007_6.tif	control	MT15434	tph1	14.071	14.227	5.55731	2.07954	-3.47777	0	0.29777	0.619225	-1.03558
00000007_6.tif	control	MT15434	tph1	14.488	14.019	5.55731	1.80061	-3.7567	0	0.29777	0.536167	-1.11863
00000007_6.tif	control	MT15434	tph1	14.814	14.026	5.55731	1.81137	-3.74594	0	0.29777	0.539372	-1.11543
00000007_6.tif	control	MT15434	tph1	14.356	15.089	5.55731	2.87807	-2.67924	0	0.29777	0.857004	-0.797797
00000007_6.tif	control	MT15434	tph1	14.599	15.005	5.55731	2.78117	-2.77614	0	0.29777	0.82815	-0.82665
00000007_6.tif	control	MT15434	tph1	14.363	14.915	5.55731	2.70421	-2.8531	0	0.29777	0.805234	-0.849567
00000007_6.tif	control	MT15434	tph1	15.009	13.505	5.55731	1.33589	-4.22142	0	0.29777	0.397788	-1.25701
00000007_6.tif	control	MT15434	tph1	15.273	12.95	5.55731	0.969807	-4.5875	0	0.29777	0.288779	-1.36602
00000007_6.tif	control	MT15434	tph1	16.28	12.929	5.55731	1.7943	-3.76301	0	0.29777	0.53429	-1.12051
00000007_6.tif	control	MT15434	tph1	16.203	13.144	5.55731	1.82229	-3.73502	0	0.29777	0.542622	-1.11218
00000007_6.tif	control	MT15434	tph1	16.238	13.318	5.55731	1.94487	-3.61245	0	0.29777	0.579122	-1.07568
00000007_6.tif	control	MT15434	tph1	16.634	12.984	5.55731	2.14327	-3.41404	0	0.29777	0.638202	-1.0166
00000007_6.tif	control	MT15434	tph1	16.988	13.54	5.55731	2.70037	-2.85694	0	0.29777	0.80409	-0.85071
00000007_6.tif	control	MT15434	tph1	17.148	13.457	5.55731	2.80368	-2.75363	0	0.29777	0.834851	-0.819949
00000007_6.tif	control	MT15434	tph1	17.21	13.248	5.55731	2.77578	-2.78153	0	0.29777	0.826545	-0.828255
00000007_6.tif	control	MT15434	tph1	17.203	12.88	5.55731	2.65531	-2.902	0	0.29777	0.790671	-0.864129
00000007_6.tif	control	MT15434	tph1	17.078	12.665	5.55731	2.48741	-3.06991	0	0.29777	0.740675	-0.914126
00000007_6.tif	control	MT15434	tph1	16.967	12.484	5.55731	2.35142	-3.20589	0	0.29777	0.700182	-0.954618
00000007_6.tif	control	MT15434	tph1	17.321	12.568	5.55731	2.7129	-2.84441	0	0.29777	0.80782	-0.846981
00000007_6.tif	control	MT15434	tph1	17.613	13.026	5.55731	3.08893	-2.46838	0	0.29777	0.919791	-0.735009
00000007_6.tif	control	MT15434	tph1	17.891	12.908	5.55731	3.33196	-2.22535	0	0.29777	0.992159	-0.662642
00000007_6.tif	control	MT15434	tph1	17.203	14.693	5.55731	3.56599	-1.99132	0	0.29777	1.06185	-0.592955
00000007_6.tif	control	MT15434	tph1	15.884	15.568	5.55731	3.57139	-1.98592	0	0.29777	1.06345	-0.591346
00000007_6.tif	control	MT15434	tph1	16.002	16.345	5.55731	4.34339	-1.21392	0	0.29777	1.29333	-0.361469
00000007_6.tif	control	MT15434	tph1	17.064	16.623	5.55731	5.02748	-0.52983	0	0.29777	1.49703	-0.157768
00000007_6.tif	control	MT15434	tph1	17.321	16.707	5.55731	5.22865	-0.328661	0	0.29777	1.55693	-0.0978655
00000007_6.tif	control	MT15434	tph1	17.793	15.88	5.55731	4.83435	-0.722964	0	0.29777	1.43952	-0.215277
00000007_6.tif	control	MT15434	tph1	17.842	15.693	5.55731	4.72767	-0.829636	0	0.29777	1.40776	-0.247041
00000007_6.tif	control	MT15434	tph1	18.741	15.595	5.55731	5.31639	-0.240924	0	0.29777	1.58306	-0.07174
00000007_6.tif	control	MT15434	tph1	19.075	14.873	5.55731	5.17448	-0.382832	0	0.29777	1.5408	-0.113996
00000007_6.tif	control	MT15434	tph1	18.658	14.484	5.55731	4.6187	-0.938611	0	0.29777	1.37531	-0.27949
00000007_6.tif	control	MT15434	tph1	18.686	14.345	5.55731	4.57709	-0.980218	0	0.29777	1.36292	-0.291879
00000007_6.tif	control	MT15434	tph1	18.929	14.061	5.55731	4.67504	-0.882273	0	0.29777	1.39209	-0.262715
00000007_6.tif	control	MT15434	tph1	18.984	13.95	5.55731	4.68363	-0.87368	0	0.29777	1.39464	-0.260156
00000007_6.tif	control	MT15434	tph1	18.797	13.887	5.55731	4.48659	-1.07072	0	0.29777	1.33597	-0.318829
00000007_6.tif	control	MT15434	tph1	19.047	14.241	5.55731	4.85574	-0.701574	0	0.29777	1.44589	-0.208908
00000007_6.tif	control	MT15434	tph1	19.227	14.137	5.55731	4.97915	-0.578156	0	0.29777	1.48264	-0.172158
00000007_6.tif	control	MT15434	tph1	18.825	13.161	5.55731	4.29837	-1.25894	0	0.29777	1.27993	-0.374874
00000007_6.tif	control	MT15434	tph1	18.332	12.391	5.55731	3.70576	-1.85155	0	0.29777	1.10347	-0.551335
00000007_6.tif	control	MT15434	tph1	18.116	11.46	5.55731	3.56874	-1.98857	0	0.29777	1.06266	-0.592137
00000007_6.tif	control	MT15434	tph1	18.901	12.432	5.55731	4.27606	-1.28125	0	0.29777	1.27328	-0.381517
00000007_6.tif	control	MT15434	tph1	19.2	12.321	5.55731	4.57103	-0.986281	0	0.29777	1.36112	-0.293685
00000007_6.tif	control	MT15434	tph1	19.325	12.696	5.55731	4.71867	-0.838644	0	0.29777	1.40508	-0.249723
00000007_6.tif	control	MT15434	tph1	20.109	12.3	5.55731	5.47953	-0.0777833	0	0.29777	1.63164	-0.0231615
00000007_6.tif	control	MT15434	tph1	19.248	10.356	5.55731	4.9815	-0.57581	0	0.29777	1.48334	-0.171459
00000007_6.tif	control	MT15434	tph1	19.193	10.293	5.55731	4.95477	-0.602542	0	0.29777	1.47538	-0.179419
00000007_6.tif	control	MT15434	tph1	18.512	9.832	5.55731	4.55978	-0.997531	0	0.29777	1.35777	-0.297035
00000007_6.tif	control	MT15434	tph1	18.686	9.505	5.55731	4.88304	-0.674269	0	0.29777	1.45402	-0.200777
0000007_14.tif	control	N2	wt	8.656	10.75	4.53655	4.36474	-0.171813	0	0.29777	1.29969	-0.0511608
0000007_14.tif	control	N2	wt	8.714	10.964	4.53655	4.35081	-0.185747	0	0.29777	1.29554	-0.05531
0000007_14.tif	control	N2	wt	9.182	10.828	4.53655	3.8643	-0.672259	0	0.29777	1.15067	-0.200179
0000007_14.tif	control	N2	wt	9.13	10.938	4.53655	3.94023	-0.59632	0	0.29777	1.17328	-0.177566
0000007_14.tif	control	N2	wt	9.333	10.922	4.53655	3.73955	-0.797003	0	0.29777	1.11353	-0.237324
0000007_14.tif	control	N2	wt	9.432	10.656	4.53655	3.58455	-0.952001	0	0.29777	1.06737	-0.283477
0000007_14.tif	control	N2	wt	9.448	10.443	4.53655	3.53493	-1.00163	0	0.29777	1.0526	-0.298255
0000007_14.tif	control	N2	wt	9.089	10.224	4.53655	3.87145	-0.665108	0	0.29777	1.1528	-0.198049
0000007_14.tif	control	N2	wt	9.26	10.12	4.53655	3.6955	-0.841051	0	0.29777	1.10041	-0.25044
0000007_14.tif	control	N2	wt	10.031	10.792	4.53655	3.03166	-1.5049	0	0.29777	0.902737	-0.448113
0000007_14.tif	control	N2	wt	10.182	10.401	4.53655	2.8022	-1.73435	0	0.29777	0.834411	-0.516438
0000007_14.tif	control	N2	wt	10.568	10.469	4.53655	2.43381	-2.10274	0	0.29777	0.724717	-0.626133
0000007_14.tif	control	N2	wt	10.885	10.427	4.53655	2.11492	-2.42164	0	0.29777	0.629759	-0.721091
0000007_14.tif	control	N2	wt	10.88	10.318	4.53655	2.09973	-2.43682	0	0.29777	0.625238	-0.725612
0000007_14.tif	control	N2	wt	9.651	12.182	4.53655	3.96666	-0.569892	0	0.29777	1.18115	-0.169697
0000007_14.tif	control	N2	wt	10.234	12.12	4.53655	3.45767	-1.07889	0	0.29777	1.02959	-0.32126
0000007_14.tif	control	N2	wt	10.312	11.766	4.53655	3.18597	-1.35058	0	0.29777	0.948686	-0.402164
0000007_14.tif	control	N2	wt	10.224	11.703	4.53655	3.22528	-1.31128	0	0.29777	0.96039	-0.39046
0000007_14.tif	control	N2	wt	10.88	11.708	4.53655	2.6962	-1.84035	0	0.29777	0.802848	-0.548002
0000007_14.tif	control	N2	wt	11.005	12.036	4.53655	2.82938	-1.70717	0	0.29777	0.842505	-0.508344
0000007_14.tif	control	N2	wt	11.057	12.057	4.53655	2.8093	-1.72726	0	0.29777	0.836524	-0.514326
0000007_14.tif	control	N2	wt	10.646	12.771	4.53655	3.61796	-0.918597	0	0.29777	1.07732	-0.273531
0000007_14.tif	control	N2	wt	10.271	12.896	4.53655	3.9589	-0.577657	0	0.29777	1.17884	-0.172009
0000007_14.tif	control	N2	wt	10.969	13.031	4.53655	3.636	-0.900559	0	0.29777	1.08269	-0.268159
0000007_14.tif	control	N2	wt	11.083	12.932	4.53655	3.49107	-1.04548	0	0.29777	1.03954	-0.311312
0000007_14.tif	control	N2	wt	11.396	13.354	4.53655	3.7123	-0.824257	0	0.29777	1.10541	-0.245439
0000007_14.tif	control	N2	wt	11.297	13.224	4.53655	3.63867	-0.897882	0	0.29777	1.08349	-0.267362
0000007_14.tif	control	N2	wt	8.656	9.427	4.53655	4.33295	-0.203604	0	0.29777	1.29022	-0.0606272
0000007_14.tif	control	N2	wt	8.875	9.646	4.53655	4.09198	-0.444571	0	0.29777	1.21847	-0.13238
0000007_14.tif	control	N2	wt	9.229	9.62	4.53655	3.74175	-0.794807	0	0.29777	1.11418	-0.23667
0000007_14.tif	control	N2	wt	9.297	9.042	4.53655	3.77541	-0.761147	0	0.29777	1.1242	-0.226647
0000007_14.tif	control	N2	wt	10.214	9.167	4.53655	2.85825	-1.6783	0	0.29777	0.851102	-0.499748
0000007_14.tif	control	N2	wt	10.266	9.125	4.53655	2.82097	-1.71559	0	0.29777	0.839999	-0.510851
0000007_14.tif	control	N2	wt	11.354	9.526	4.53655	1.6633	-2.87325	0	0.29777	0.495281	-0.855569
0000007_14.tif	control	N2	wt	10.245	8.943	4.53655	2.9012	-1.63536	0	0.29777	0.863889	-0.48696
0000007_14.tif	control	N2	wt	10.167	8.87	4.53655	3.00047	-1.53609	0	0.29777	0.893449	-0.457401
0000007_14.tif	control	N2	wt	10.271	8.458	4.53655	3.08574	-1.45081	0	0.29777	0.918841	-0.432009
0000007_14.tif	control	N2	wt	9	8.479	4.53655	4.2298	-0.306751	0	0.29777	1.25951	-0.0913413
0000007_14.tif	control	N2	wt	9.172	8.13	4.53655	4.21109	-0.325465	0	0.29777	1.25394	-0.0969136
0000007_14.tif	control	N2	wt	9.286	7.932	4.53655	4.20209	-0.334461	0	0.29777	1.25126	-0.0995923
0000007_14.tif	control	N2	wt	9.464	7.703	4.53655	4.16846	-0.368092	0	0.29777	1.24124	-0.109607
0000007_14.tif	control	N2	wt	9.583	7.698	4.53655	4.07219	-0.464369	0	0.29777	1.21257	-0.138275
0000007_14.tif	control	N2	wt	9.589	8	4.53655	3.90548	-0.631077	0	0.29777	1.16293	-0.187916
0000007_14.tif	control	N2	wt	9.781	7.958	4.53655	3.76381	-0.772745	0	0.29777	1.12075	-0.2301
0000007_14.tif	control	N2	wt	10.547	7.688	4.53655	3.32573	-1.21083	0	0.29777	0.990301	-0.360548
0000007_14.tif	control	N2	wt	10.802	7.734	4.53655	3.11276	-1.42379	0	0.29777	0.926888	-0.423962
0000007_14.tif	control	N2	wt	11.104	7.656	4.53655	2.97294	-1.56361	0	0.29777	0.885253	-0.465597
0000007_14.tif	control	N2	wt	10.01	7.125	4.53655	4.10306	-0.433491	0	0.29777	1.22177	-0.129081
0000007_14.tif	control	N2	wt	10.516	7.312	4.53655	3.61643	-0.920126	0	0.29777	1.07686	-0.273986
0000007_14.tif	control	N2	wt	10.776	7.01	4.53655	3.68565	-0.850906	0	0.29777	1.09748	-0.253374
0000007_14.tif	control	N2	wt	10.807	6.911	4.53655	3.74815	-0.788402	0	0.29777	1.11609	-0.234763
0000007_14.tif	control	N2	wt	10.656	6.844	4.53655	3.89048	-0.646078	0	0.29777	1.15847	-0.192383
0000007_14.tif	control	N2	wt	11.182	6.807	4.53655	3.63728	-0.899279	0	0.29777	1.08307	-0.267778
0000007_14.tif	control	N2	wt	11.302	6.797	4.53655	3.58926	-0.947297	0	0.29777	1.06877	-0.282077
0000007_14.tif	control	N2	wt	12.365	6.344	4.53655	3.68719	-0.849368	0	0.29777	1.09793	-0.252916
0000007_14.tif	control	N2	wt	12.745	6.219	4.53655	3.77074	-0.765813	0	0.29777	1.12281	-0.228036
0000007_14.tif	control	N2	wt	13.146	6.365	4.53655	3.62414	-0.912412	0	0.29777	1.07916	-0.271689
0000007_14.tif	control	N2	wt	13.229	6.453	4.53655	3.54177	-0.994784	0	0.29777	1.05463	-0.296217
0000007_14.tif	control	N2	wt	13.417	6.458	4.53655	3.5564	-0.980156	0	0.29777	1.05899	-0.291861
0000007_14.tif	control	N2	wt	13.547	6.484	4.53655	3.55005	-0.986507	0	0.29777	1.0571	-0.293752
0000007_14.tif	control	N2	wt	14.74	6.469	4.53655	3.94317	-0.593384	0	0.29777	1.17416	-0.176692
0000007_14.tif	control	N2	wt	15.214	6.646	4.53655	4.03167	-0.504884	0	0.29777	1.20051	-0.150339
0000007_14.tif	control	N2	wt	15.01	6.885	4.53655	3.71955	-0.817005	0	0.29777	1.10757	-0.243279
0000007_14.tif	control	N2	wt	14.76	7.089	4.53655	3.41266	-1.12389	0	0.29777	1.01619	-0.334661
0000007_14.tif	control	N2	wt	14.792	7.193	4.53655	3.34239	-1.19416	0	0.29777	0.995265	-0.355585
0000007_14.tif	control	N2	wt	14.74	7.323	4.53655	3.20535	-1.3312	0	0.29777	0.954458	-0.396392
0000007_14.tif	control	N2	wt	11.792	8.271	4.53655	2.06937	-2.46718	0	0.29777	0.616196	-0.734654
0000007_14.tif	control	N2	wt	11.859	8.219	4.53655	2.07655	-2.46	0	0.29777	0.618334	-0.732515
0000007_14.tif	control	N2	wt	11.839	8.615	4.53655	1.76498	-2.77157	0	0.29777	0.525558	-0.825291
0000007_14.tif	control	N2	wt	11.839	8.49	4.53655	1.86361	-2.67295	0	0.29777	0.554926	-0.795923
0000007_14.tif	control	N2	wt	12.38	8.214	4.53655	1.86044	-2.67612	0	0.29777	0.553983	-0.796867
0000007_14.tif	control	N2	wt	12.443	8.125	4.53655	1.92769	-2.60887	0	0.29777	0.574008	-0.776842
0000007_14.tif	control	N2	wt	13.656	7.167	4.53655	2.90339	-1.63316	0	0.29777	0.864544	-0.486306
0000007_14.tif	control	N2	wt	13.667	7.323	4.53655	2.75513	-1.78143	0	0.29777	0.820394	-0.530456
0000007_14.tif	control	N2	wt	13.776	7.302	4.53655	2.80543	-1.73112	0	0.29777	0.835374	-0.515476
0000007_14.tif	control	N2	wt	13.76	7.87	4.53655	2.2628	-2.27376	0	0.29777	0.673793	-0.677057
0000007_14.tif	control	N2	wt	14.359	8.354	4.53655	2.15261	-2.38394	0	0.29777	0.640983	-0.709867
0000007_14.tif	control	N2	wt	14.443	8.208	4.53655	2.31825	-2.21831	0	0.29777	0.690305	-0.660545
0000007_14.tif	control	N2	wt	14.99	7.745	4.53655	3.02696	-1.50959	0	0.29777	0.901338	-0.449512
0000007_14.tif	control	N2	wt	12.208	8.786	4.53655	1.41075	-3.1258	0	0.29777	0.42008	-0.930769
0000007_14.tif	control	N2	wt	12.536	8.661	4.53655	1.38716	-3.14939	0	0.29777	0.413055	-0.937795
0000007_14.tif	control	N2	wt	12.927	8.76	4.53655	1.22428	-3.31228	0	0.29777	0.364553	-0.986297
0000007_14.tif	control	N2	wt	13.203	8.797	4.53655	1.21304	-3.32351	0	0.29777	0.361207	-0.989643
0000007_14.tif	control	N2	wt	13.297	8.661	4.53655	1.36699	-3.16956	0	0.29777	0.407049	-0.943801
0000007_14.tif	control	N2	wt	16.042	8.781	4.53655	3.31499	-1.22157	0	0.29777	0.987103	-0.363747
0000007_14.tif	control	N2	wt	16.005	9.286	4.53655	3.1308	-1.40575	0	0.29777	0.932258	-0.418592
0000007_14.tif	control	N2	wt	12.464	9.214	4.53655	0.912152	-3.6244	0	0.29777	0.271611	-1.07924
0000007_14.tif	control	N2	wt	12.781	9.234	4.53655	0.76947	-3.76708	0	0.29777	0.229125	-1.12172
0000007_14.tif	control	N2	wt	12.255	9.776	4.53655	0.728332	-3.80822	0	0.29777	0.216876	-1.13397
0000007_14.tif	control	N2	wt	12.219	10.021	4.53655	0.734932	-3.80162	0	0.29777	0.218841	-1.13201
0000007_14.tif	control	N2	wt	12.375	9.849	4.53655	0.593556	-3.943	0	0.29777	0.176743	-1.17411
0000007_14.tif	control	N2	wt	13.38	9.656	4.53655	0.538436	-3.99812	0	0.29777	0.16033	-1.19052
0000007_14.tif	control	N2	wt	13.432	9.443	4.53655	0.72258	-3.81397	0	0.29777	0.215163	-1.13569
0000007_14.tif	control	N2	wt	13.917	9.411	4.53655	1.12144	-3.41512	0	0.29777	0.333931	-1.01692
0000007_14.tif	control	N2	wt	14.052	9.526	4.53655	1.19062	-3.34594	0	0.29777	0.35453	-0.99632
0000007_14.tif	control	N2	wt	14.328	9.37	4.53655	1.50586	-3.03069	0	0.29777	0.448401	-0.902449
0000007_14.tif	control	N2	wt	14.349	9.849	4.53655	1.40251	-3.13404	0	0.29777	0.417626	-0.933224
0000007_14.tif	control	N2	wt	14.453	9.859	4.53655	1.5052	-3.03136	0	0.29777	0.448203	-0.902647
0000007_14.tif	control	N2	wt	14.208	10.057	4.53655	1.25712	-3.27943	0	0.29777	0.374333	-0.976517
0000007_14.tif	control	N2	wt	14.547	10.021	4.53655	1.59443	-2.94213	0	0.29777	0.474773	-0.876077
0000007_14.tif	control	N2	wt	14.469	10.208	4.53655	1.53246	-3.00409	0	0.29777	0.45632	-0.894529
0000007_14.tif	control	N2	wt	14.531	10.328	4.53655	1.61506	-2.92149	0	0.29777	0.480917	-0.869933
0000007_14.tif	control	N2	wt	15.703	10.099	4.53655	2.7524	-1.78415	0	0.29777	0.819583	-0.531267
0000007_14.tif	control	N2	wt	11.979	10.932	4.53655	1.35918	-3.17737	0	0.29777	0.404724	-0.946126
0000007_14.tif	control	N2	wt	11.943	11.104	4.53655	1.50814	-3.02841	0	0.29777	0.44908	-0.90177
0000007_14.tif	control	N2	wt	11.87	11.359	4.53655	1.75029	-2.78626	0	0.29777	0.521184	-0.829666
0000007_14.tif	control	N2	wt	11.766	11.469	4.53655	1.9011	-2.63545	0	0.29777	0.566092	-0.784758
0000007_14.tif	control	N2	wt	12.052	11.094	4.53655	1.42965	-3.1069	0	0.29777	0.425707	-0.925143
0000007_14.tif	control	N2	wt	12.167	11.13	4.53655	1.38964	-3.14691	0	0.29777	0.413794	-0.937055
0000007_14.tif	control	N2	wt	12.13	11.219	4.53655	1.4841	-3.05245	0	0.29777	0.441921	-0.908929
0000007_14.tif	control	N2	wt	12.281	11.297	4.53655	1.47498	-3.06158	0	0.29777	0.439203	-0.911646
0000007_14.tif	control	N2	wt	12.25	11.536	4.53655	1.70379	-2.83276	0	0.29777	0.507339	-0.843511
0000007_14.tif	control	N2	wt	12.375	11.188	4.53655	1.33555	-3.201	0	0.29777	0.397687	-0.953162
0000007_14.tif	control	N2	wt	12.448	11.161	4.53655	1.28076	-3.25579	0	0.29777	0.381373	-0.969477
0000007_14.tif	control	N2	wt	11.844	12.177	4.53655	2.45746	-2.07909	0	0.29777	0.731759	-0.619091
0000007_14.tif	control	N2	wt	12.964	10.224	4.53655	0.240252	-4.2963	0	0.29777	0.0715398	-1.27931
0000007_14.tif	control	N2	wt	13.036	10.151	4.53655	0.186489	-4.35007	0	0.29777	0.0555307	-1.29532
0000007_14.tif	control	N2	wt	13.109	10.703	4.53655	0.735729	-3.80083	0	0.29777	0.219078	-1.13177
0000007_14.tif	control	N2	wt	13.177	10.854	4.53655	0.898374	-3.63818	0	0.29777	0.267509	-1.08334
0000007_14.tif	control	N2	wt	13.302	10.844	4.53655	0.928117	-3.60844	0	0.29777	0.276365	-1.07448
0000007_14.tif	control	N2	wt	13.63	10.844	4.53655	1.0945	-3.44205	0	0.29777	0.325909	-1.02494
0000007_14.tif	control	N2	wt	13.797	10.729	4.53655	1.12577	-3.41078	0	0.29777	0.335221	-1.01563
0000007_14.tif	control	N2	wt	13.896	10.76	4.53655	1.22124	-3.31532	0	0.29777	0.363648	-0.987201
0000007_14.tif	control	N2	wt	14.307	10.635	4.53655	1.50237	-3.03418	0	0.29777	0.447361	-0.903489
0000007_14.tif	control	N2	wt	14.448	10.458	4.53655	1.56834	-2.96821	0	0.29777	0.467006	-0.883844
0000007_14.tif	control	N2	wt	13.573	11.198	4.53655	1.36316	-3.1734	0	0.29777	0.405907	-0.944943
0000007_14.tif	control	N2	wt	13.625	11.266	4.53655	1.44745	-3.08911	0	0.29777	0.431007	-0.919843
0000007_14.tif	control	N2	wt	14.823	10.74	4.53655	2.01704	-2.51952	0	0.29777	0.600613	-0.750237
0000007_14.tif	control	N2	wt	15.125	11.229	4.53655	2.50352	-2.03304	0	0.29777	0.745473	-0.605377
0000007_14.tif	control	N2	wt	15.094	11.339	4.53655	2.53375	-2.0028	0	0.29777	0.754476	-0.596374
0000007_14.tif	control	N2	wt	14.521	11.917	4.53655	2.489	-2.04756	0	0.29777	0.741149	-0.609701
0000007_14.tif	control	N2	wt	15.208	11.797	4.53655	2.89344	-1.64311	0	0.29777	0.86158	-0.48927
0000007_14.tif	control	N2	wt	15.224	11.708	4.53655	2.85125	-1.68531	0	0.29777	0.849016	-0.501834
0000007_14.tif	control	N2	wt	15.37	11.807	4.53655	3.02741	-1.50914	0	0.29777	0.901472	-0.449378
0000007_14.tif	control	N2	wt	15.906	11.599	4.53655	3.36577	-1.17078	0	0.29777	1.00223	-0.348623
0000007_14.tif	control	N2	wt	16.016	11.589	4.53655	3.45803	-1.07852	0	0.29777	1.0297	-0.321151
0000007_14.tif	control	N2	wt	15.953	11.698	4.53655	3.45511	-1.08144	0	0.29777	1.02883	-0.322021
0000007_14.tif	control	N2	wt	15.823	12.203	4.53655	3.62779	-0.908764	0	0.29777	1.08025	-0.270603
0000007_14.tif	control	N2	wt	11.661	13.854	4.53655	4.07997	-0.456583	0	0.29777	1.21489	-0.135957
0000007_14.tif	control	N2	wt	11.797	13.844	4.53655	4.02938	-0.50717	0	0.29777	1.19983	-0.15102
0000007_14.tif	control	N2	wt	11.682	13.307	4.53655	3.55778	-0.978778	0	0.29777	1.0594	-0.291451
0000007_14.tif	control	N2	wt	12.219	12.969	4.53655	3.07392	-1.46263	0	0.29777	0.915321	-0.435529
0000007_14.tif	control	N2	wt	12.38	12.625	4.53655	2.70245	-1.83411	0	0.29777	0.804707	-0.546143
0000007_14.tif	control	N2	wt	12.594	12.714	4.53655	2.7535	-1.78305	0	0.29777	0.819911	-0.530939
0000007_14.tif	control	N2	wt	12.583	13.411	4.53655	3.44692	-1.08964	0	0.29777	1.02639	-0.324462
0000007_14.tif	control	N2	wt	12.531	13.922	4.53655	3.96055	-0.576008	0	0.29777	1.17933	-0.171518
0000007_14.tif	control	N2	wt	12.589	13.807	4.53655	3.84029	-0.696265	0	0.29777	1.14352	-0.207327
0000007_14.tif	control	N2	wt	12.995	13.698	4.53655	3.71424	-0.822317	0	0.29777	1.10599	-0.244861
0000007_14.tif	control	N2	wt	12.906	13.312	4.53655	3.32833	-1.20822	0	0.29777	0.991077	-0.359772
0000007_14.tif	control	N2	wt	12.948	13.146	4.53655	3.162	-1.37455	0	0.29777	0.94155	-0.4093
0000007_14.tif	control	N2	wt	13.417	13.292	4.53655	3.34038	-1.19617	0	0.29777	0.994666	-0.356184
0000007_14.tif	control	N2	wt	13.792	13.786	4.53655	3.89347	-0.643082	0	0.29777	1.15936	-0.191491
0000007_14.tif	control	N2	wt	13.833	13.875	4.53655	3.98927	-0.547284	0	0.29777	1.18789	-0.162965
0000007_14.tif	control	N2	wt	13.953	13.745	4.53655	3.89167	-0.644881	0	0.29777	1.15882	-0.192026
0000007_14.tif	control	N2	wt	13.984	13.656	4.53655	3.81399	-0.722561	0	0.29777	1.13569	-0.215157
0000007_14.tif	control	N2	wt	14.109	13.74	4.53655	3.92987	-0.606685	0	0.29777	1.1702	-0.180653
0000007_14.tif	control	N2	wt	14.177	13.609	4.53655	3.82607	-0.710486	0	0.29777	1.13929	-0.211561
0000007_14.tif	control	N2	wt	14.214	13.526	4.53655	3.75977	-0.776782	0	0.29777	1.11955	-0.231303
0000007_14.tif	control	N2	wt	14.333	13.432	4.53655	3.71391	-0.822648	0	0.29777	1.10589	-0.24496
0000007_14.tif	control	N2	wt	14.37	13.323	4.53655	3.62723	-0.909323	0	0.29777	1.08008	-0.270769
0000007_14.tif	control	N2	wt	14.26	12.922	4.53655	3.2156	-1.32095	0	0.29777	0.95751	-0.39334
0000007_14.tif	control	N2	wt	14.698	12.802	4.53655	3.31454	-1.22202	0	0.29777	0.986969	-0.36388
0000007_14.tif	control	N2	wt	14.724	12.906	4.53655	3.4168	-1.11975	0	0.29777	1.01742	-0.333429
0000007_14.tif	control	N2	wt	14.682	13.625	4.53655	4.03067	-0.505882	0	0.29777	1.20021	-0.150636
0000007_14.tif	control	N2	wt	14.844	13.099	4.53655	3.64405	-0.892504	0	0.29777	1.08509	-0.265761
0000007_14.tif	control	N2	wt	14.932	13.01	4.53655	3.61568	-0.920878	0	0.29777	1.07664	-0.27421
0000007_14.tif	control	N2	wt	14.99	12.896	4.53655	3.55375	-0.982808	0	0.29777	1.0582	-0.292651
0000007_14.tif	control	N2	wt	15.484	13.219	4.53655	4.10745	-0.429099	0	0.29777	1.22308	-0.127773
0000007_14.tif	control	N2	wt	15.578	13.146	4.53655	4.10961	-0.426947	0	0.29777	1.22372	-0.127132
0000007_14.tif	control	N2	wt	15.839	12.677	4.53655	3.94731	-0.589246	0	0.29777	1.17539	-0.17546
0000007_14.tif	control	N2	wt	15.974	12.625	4.53655	4.01265	-0.523909	0	0.29777	1.19485	-0.156004
0000007_14.tif	control	N2	wt	16.089	12.74	4.53655	4.17493	-0.361625	0	0.29777	1.24317	-0.107681
0000007_14.tif	control	N2	wt	18.568	13.339	4.53655	6.54097	2.00441	1	0.29777	1.9477	0.596854
0000007_14.tif	control	N2	wt	18.495	13.245	4.53655	6.43023	1.89368	1	0.29777	1.91473	0.56388
0000007_14.tif	control	N2	wt	17.948	13.526	4.53655	6.12338	1.58683	1	0.29777	1.82336	0.472509
0000007_14.tif	control	N2	wt	17.839	13.339	4.53655	5.92697	1.39042	1	0.29777	1.76488	0.414025
0000007_14.tif	control	N2	wt	17.401	12.932	4.53655	5.33624	0.799681	1	0.29777	1.58897	0.238121
0000007_14.tif	control	N2	wt	17.583	12.745	4.53655	5.39073	0.85418	1	0.29777	1.6052	0.254349
0000007_14.tif	control	N2	wt	17.578	12.464	4.53655	5.24795	0.7114	1	0.29777	1.56268	0.211834
0000007_14.tif	control	N2	wt	17.734	12.443	4.53655	5.3763	0.839749	1	0.29777	1.6009	0.250052
0000007_14.tif	control	N2	wt	17.177	12.469	4.53655	4.90076	0.364201	1	0.29777	1.4593	0.108448
0000007_14.tif	control	N2	wt	16.797	12.75	4.53655	4.73573	0.199171	1	0.29777	1.41016	0.0593071
0000007_14.tif	control	N2	wt	16.266	12.312	4.53655	4.04914	-0.487412	0	0.29777	1.20571	-0.145137
0000007_14.tif	control	N2	wt	16.458	12.177	4.53655	4.13452	-0.402032	0	0.29777	1.23114	-0.119713
0000007_14.tif	control	N2	wt	17.047	12.177	4.53655	4.64436	0.107806	1	0.29777	1.38295	0.0321014
0000007_14.tif	control	N2	wt	16.521	11.932	4.53655	4.06514	-0.471419	0	0.29777	1.21048	-0.140374
0000007_14.tif	control	N2	wt	16.344	11.771	4.53655	3.83305	-0.703507	0	0.29777	1.14137	-0.209483
0000007_14.tif	control	N2	wt	16.323	11.693	4.53655	3.77857	-0.757986	0	0.29777	1.12514	-0.225705
0000007_14.tif	control	N2	wt	16.208	11.281	4.53655	3.50389	-1.03267	0	0.29777	1.04335	-0.307497
0000007_14.tif	control	N2	wt	16.802	10.469	4.53655	3.87944	-0.657118	0	0.29777	1.15518	-0.19567
0000007_14.tif	control	N2	wt	17.047	9.578	4.53655	4.11408	-0.422472	0	0.29777	1.22505	-0.1258
0000007_14.tif	control	N2	wt	16.812	9.5	4.53655	3.88923	-0.647321	0	0.29777	1.1581	-0.192753
0000007_14.tif	control	N2	wt	16.583	9.339	4.53655	3.68686	-0.849696	0	0.29777	1.09784	-0.253014
0000007_14.tif	control	N2	wt	16.505	9.26	4.53655	3.62504	-0.911519	0	0.29777	1.07943	-0.271423
0000007_14.tif	control	N2	wt	16.5	9.083	4.53655	3.65965	-0.876908	0	0.29777	1.08973	-0.261117
0000007_16.tif	predator	N2	wt	6.667	6.927	5.4844	8.5979	3.11349	1	0.29777	2.5602	0.927104
0000007_16.tif	predator	N2	wt	10.759	16.72	5.4844	6.36743	0.883022	1	0.29777	1.89603	0.262937
0000007_16.tif	predator	N2	wt	9.634	15.595	5.4844	6.19004	0.705637	1	0.29777	1.84321	0.210118
0000007_16.tif	predator	N2	wt	10.446	15.422	5.4844	5.50435	0.0199501	1	0.29777	1.63903	0.00594055
0000007_16.tif	predator	N2	wt	10.28	15.186	5.4844	5.44379	-0.0406187	0	0.29777	1.621	-0.012095
0000007_16.tif	predator	N2	wt	11.016	15.401	5.4844	5.12924	-0.355168	0	0.29777	1.52733	-0.105758
0000007_16.tif	predator	N2	wt	11.724	15.589	5.4844	4.90481	-0.579598	0	0.29777	1.4605	-0.172587
0000007_16.tif	predator	N2	wt	12.307	15.943	5.4844	4.98238	-0.502027	0	0.29777	1.4836	-0.149488
0000007_16.tif	predator	N2	wt	12.828	16.019	5.4844	4.89528	-0.589122	0	0.29777	1.45767	-0.175423
0000007_16.tif	predator	N2	wt	12.925	16.005	5.4844	4.85782	-0.626589	0	0.29777	1.44651	-0.186579
0000007_16.tif	predator	N2	wt	11.439	14.179	5.4844	3.91584	-1.56857	0	0.29777	1.16602	-0.467073
0000007_16.tif	predator	N2	wt	13.05	13.589	5.4844	2.52202	-2.96238	0	0.29777	0.750982	-0.882109
0000007_16.tif	predator	N2	wt	12.641	13.262	5.4844	2.44327	-3.04114	0	0.29777	0.727531	-0.90556
0000007_16.tif	predator	N2	wt	12.314	13.116	5.4844	2.54177	-2.94263	0	0.29777	0.756863	-0.876228
0000007_16.tif	predator	N2	wt	12.835	12.658	5.4844	1.85133	-3.63307	0	0.29777	0.551271	-1.08182
0000007_16.tif	predator	N2	wt	12.648	12.512	5.4844	1.88361	-3.6008	0	0.29777	0.560882	-1.07221
0000007_16.tif	predator	N2	wt	11.655	12.491	5.4844	2.7061	-2.77831	0	0.29777	0.805794	-0.827297
0000007_16.tif	predator	N2	wt	11.835	12.408	5.4844	2.50797	-2.97643	0	0.29777	0.746799	-0.886292
0000007_16.tif	predator	N2	wt	9.682	11.981	5.4844	4.4506	-1.0338	0	0.29777	1.32526	-0.307836
0000007_16.tif	predator	N2	wt	10.96	11.689	5.4844	3.14394	-2.34047	0	0.29777	0.93617	-0.696921
0000007_16.tif	predator	N2	wt	11.05	11.745	5.4844	3.06259	-2.42181	0	0.29777	0.911948	-0.721143
0000007_16.tif	predator	N2	wt	11.786	11.092	5.4844	2.3002	-3.18421	0	0.29777	0.684929	-0.948162
0000007_16.tif	predator	N2	wt	11.884	10.995	5.4844	2.21321	-3.27119	0	0.29777	0.659029	-0.974062
0000007_16.tif	predator	N2	wt	9.571	10.766	5.4844	4.5369	-0.947506	0	0.29777	1.35095	-0.282139
0000007_16.tif	predator	N2	wt	9.592	10.668	5.4844	4.52837	-0.956036	0	0.29777	1.34841	-0.284679
0000007_16.tif	predator	N2	wt	9.363	10.307	5.4844	4.81556	-0.66884	0	0.29777	1.43393	-0.19916
0000007_16.tif	predator	N2	wt	9.099	10.363	5.4844	5.06383	-0.420575	0	0.29777	1.50786	-0.125235
0000007_16.tif	predator	N2	wt	8.877	10.217	5.4844	5.30972	-0.174681	0	0.29777	1.58108	-0.0520148
0000007_16.tif	predator	N2	wt	8.655	10.398	5.4844	5.49522	0.0108182	1	0.29777	1.63631	0.00322135
0000007_16.tif	predator	N2	wt	8.613	10.536	5.4844	5.51622	0.0318193	1	0.29777	1.64257	0.00947483
0000007_16.tif	predator	N2	wt	10.738	8.495	5.4844	4.35262	-1.13179	0	0.29777	1.29608	-0.337012
0000007_16.tif	predator	N2	wt	10.71	8.273	5.4844	4.51903	-0.965379	0	0.29777	1.34563	-0.287461
0000007_16.tif	predator	N2	wt	10.599	8.252	5.4844	4.61612	-0.868281	0	0.29777	1.37454	-0.258548
0000007_16.tif	predator	N2	wt	10.356	8.134	5.4844	4.87733	-0.60707	0	0.29777	1.45232	-0.180767
0000007_16.tif	predator	N2	wt	11.391	8.557	5.4844	3.82981	-1.6546	0	0.29777	1.1404	-0.49269
0000007_16.tif	predator	N2	wt	11.252	8.411	5.4844	4.03136	-1.45304	0	0.29777	1.20042	-0.432672
0000007_16.tif	predator	N2	wt	11.203	8.099	5.4844	4.29215	-1.19225	0	0.29777	1.27807	-0.355016
0000007_16.tif	predator	N2	wt	10.988	7.974	5.4844	4.52962	-0.954786	0	0.29777	1.34878	-0.284307
0000007_16.tif	predator	N2	wt	11.21	7.842	5.4844	4.4818	-1.0026	0	0.29777	1.33455	-0.298545
0000007_16.tif	predator	N2	wt	11.252	7.668	5.4844	4.59088	-0.893522	0	0.29777	1.36703	-0.266064
0000007_16.tif	predator	N2	wt	11.321	7.655	5.4844	4.55908	-0.925325	0	0.29777	1.35756	-0.275534
0000007_16.tif	predator	N2	wt	11.398	7.467	5.4844	4.66553	-0.818875	0	0.29777	1.38925	-0.243837
0000007_16.tif	predator	N2	wt	12.648	9.127	5.4844	2.58963	-2.89477	0	0.29777	0.771114	-0.861977
0000007_16.tif	predator	N2	wt	12.821	9.036	5.4844	2.57731	-2.90709	0	0.29777	0.767447	-0.865644
0000007_16.tif	predator	N2	wt	13.217	6.432	5.4844	4.92977	-0.554634	0	0.29777	1.46794	-0.165153
0000007_16.tif	predator	N2	wt	13.377	6.196	5.4844	5.13804	-0.34636	0	0.29777	1.52996	-0.103136
0000007_16.tif	predator	N2	wt	13.46	6.502	5.4844	4.82375	-0.660653	0	0.29777	1.43637	-0.196723
0000007_16.tif	predator	N2	wt	13.488	6.648	5.4844	4.67538	-0.809028	0	0.29777	1.39219	-0.240904
0000007_16.tif	predator	N2	wt	13.87	6.578	5.4844	4.71259	-0.771812	0	0.29777	1.40327	-0.229822
0000007_16.tif	predator	N2	wt	13.884	6.3	5.4844	4.98977	-0.494632	0	0.29777	1.4858	-0.147286
0000007_16.tif	predator	N2	wt	14.786	7.148	5.4844	4.19813	-1.28627	0	0.29777	1.25008	-0.383014
0000007_16.tif	predator	N2	wt	15.668	6.668	5.4844	4.88406	-0.600346	0	0.29777	1.45433	-0.178765
0000007_16.tif	predator	N2	wt	15.946	6.599	5.4844	5.04553	-0.438873	0	0.29777	1.50241	-0.130683
0000007_16.tif	predator	N2	wt	16.273	7.488	5.4844	4.38666	-1.09774	0	0.29777	1.30622	-0.326874
0000007_16.tif	predator	N2	wt	16.405	7.585	5.4844	4.37177	-1.11264	0	0.29777	1.30178	-0.331311
0000007_16.tif	predator	N2	wt	14.224	7.786	5.4844	3.50304	-1.98136	0	0.29777	1.0431	-0.58999
0000007_16.tif	predator	N2	wt	14.286	7.766	5.4844	3.52614	-1.95826	0	0.29777	1.04998	-0.583112
0000007_16.tif	predator	N2	wt	13.898	8.439	5.4844	2.85268	-2.63172	0	0.29777	0.849444	-0.783647
0000007_16.tif	predator	N2	wt	14.03	8.599	5.4844	2.68743	-2.79698	0	0.29777	0.800236	-0.832855
0000007_16.tif	predator	N2	wt	14.043	8.967	5.4844	2.31926	-3.16514	0	0.29777	0.690607	-0.942484
0000007_16.tif	predator	N2	wt	14.224	8.849	5.4844	2.44137	-3.04304	0	0.29777	0.726967	-0.906125
0000007_16.tif	predator	N2	wt	14.217	8.717	5.4844	2.57276	-2.91165	0	0.29777	0.76609	-0.867001
0000007_16.tif	predator	N2	wt	16.064	8.863	5.4844	3.13291	-2.35149	0	0.29777	0.932887	-0.700205
0000007_16.tif	predator	N2	wt	16.203	8.835	5.4844	3.24392	-2.24048	0	0.29777	0.965942	-0.667149
0000007_16.tif	predator	N2	wt	16.877	9.585	5.4844	3.27533	-2.20907	0	0.29777	0.975296	-0.657795
0000007_16.tif	predator	N2	wt	16.967	9.425	5.4844	3.43652	-2.04789	0	0.29777	1.02329	-0.6098
0000007_16.tif	predator	N2	wt	17.28	9.321	5.4844	3.75686	-1.72754	0	0.29777	1.11868	-0.51441
0000007_16.tif	predator	N2	wt	17.967	9.307	5.4844	4.36357	-1.12083	0	0.29777	1.29934	-0.33375
0000007_16.tif	predator	N2	wt	18.016	9.182	5.4844	4.46482	-1.01958	0	0.29777	1.32949	-0.3036
0000007_16.tif	predator	N2	wt	17.918	9.668	5.4844	4.16696	-1.31745	0	0.29777	1.24079	-0.392297
0000007_16.tif	predator	N2	wt	17.495	9.585	5.4844	3.81697	-1.66743	0	0.29777	1.13658	-0.496511
0000007_16.tif	predator	N2	wt	16.814	10.113	5.4844	2.97685	-2.50756	0	0.29777	0.886416	-0.746675
0000007_16.tif	predator	N2	wt	16.293	9.96	5.4844	2.58157	-2.90284	0	0.29777	0.768714	-0.864377
0000007_16.tif	predator	N2	wt	13.175	10.696	5.4844	1.07866	-4.40574	0	0.29777	0.321193	-1.3119
0000007_16.tif	predator	N2	wt	13.266	10.8	5.4844	0.94633	-4.53807	0	0.29777	0.281789	-1.3513
0000007_16.tif	predator	N2	wt	13.203	11.259	5.4844	0.875416	-4.60899	0	0.29777	0.260673	-1.37242
0000007_16.tif	predator	N2	wt	14.043	10.259	5.4844	1.0276	-4.45681	0	0.29777	0.305987	-1.3271
0000007_16.tif	predator	N2	wt	14.571	11.286	5.4844	0.493	-4.9914	0	0.29777	0.146801	-1.48629
0000007_16.tif	predator	N2	wt	14.842	11.286	5.4844	0.764	-4.7204	0	0.29777	0.227496	-1.40559
0000007_16.tif	predator	N2	wt	13.106	12.606	5.4844	1.63926	-3.84514	0	0.29777	0.488123	-1.14497
0000007_16.tif	predator	N2	wt	13.231	12.925	5.4844	1.84492	-3.63948	0	0.29777	0.549362	-1.08373
0000007_16.tif	predator	N2	wt	13.398	12.168	5.4844	1.1137	-4.37071	0	0.29777	0.331626	-1.30147
0000007_16.tif	predator	N2	wt	15.53	12.161	5.4844	1.69527	-3.78914	0	0.29777	0.5048	-1.12829
0000007_16.tif	predator	N2	wt	15.363	12.196	5.4844	1.57459	-3.90982	0	0.29777	0.468865	-1.16423
0000007_16.tif	predator	N2	wt	15.467	12.384	5.4844	1.77057	-3.71383	0	0.29777	0.527223	-1.10587
0000007_16.tif	predator	N2	wt	15.509	12.592	5.4844	1.93737	-3.54704	0	0.29777	0.57689	-1.0562
0000007_16.tif	predator	N2	wt	15.536	12.717	5.4844	2.04292	-3.44148	0	0.29777	0.60832	-1.02477
0000007_16.tif	predator	N2	wt	13.509	14.016	5.4844	2.78867	-2.69574	0	0.29777	0.830381	-0.80271
0000007_16.tif	predator	N2	wt	14.411	14.293	5.4844	3.02538	-2.45902	0	0.29777	0.900868	-0.732223
0000007_16.tif	predator	N2	wt	15.773	14.738	5.4844	3.84569	-1.63871	0	0.29777	1.14513	-0.48796
0000007_16.tif	predator	N2	wt	15.766	14.849	5.4844	3.94263	-1.54178	0	0.29777	1.174	-0.459095
0000007_16.tif	predator	N2	wt	15.536	15.592	5.4844	4.54614	-0.938263	0	0.29777	1.3537	-0.279387
0000007_16.tif	predator	N2	wt	15.606	15.495	5.4844	4.47777	-1.00663	0	0.29777	1.33335	-0.299744
0000007_16.tif	predator	N2	wt	15.738	15.439	5.4844	4.47247	-1.01193	0	0.29777	1.33177	-0.301323
0000007_16.tif	predator	N2	wt	15.793	15.55	5.4844	4.59597	-0.888437	0	0.29777	1.36854	-0.26455
0000007_16.tif	predator	N2	wt	16.675	16.259	5.4844	5.61027	0.125866	1	0.29777	1.67057	0.0374792
0000007_16.tif	predator	N2	wt	16.87	16.314	5.4844	5.75118	0.266773	1	0.29777	1.71253	0.0794371
0000007_16.tif	predator	N2	wt	18.457	13.859	5.4844	5.07897	-0.405431	0	0.29777	1.51237	-0.120725
0000007_16.tif	predator	N2	wt	18.783	13.637	5.4844	5.25968	-0.224725	0	0.29777	1.56617	-0.0669164
0000007_16.tif	predator	N2	wt	18.852	13.491	5.4844	5.25862	-0.225783	0	0.29777	1.56586	-0.0672314
00000009_7.tif	predator	MT15434	tph1	9.469	14.917	5.18238	5.04006	-0.14232	0	0.29777	1.50078	-0.0423787
00000009_7.tif	predator	MT15434	tph1	9.589	14.668	5.18238	4.78277	-0.39961	0	0.29777	1.42417	-0.118992
00000009_7.tif	predator	MT15434	tph1	9.429	14.384	5.18238	4.72103	-0.461348	0	0.29777	1.40578	-0.137375
00000009_7.tif	predator	MT15434	tph1	9.88	14.613	5.18238	4.533	-0.64938	0	0.29777	1.34979	-0.193366
00000009_7.tif	predator	MT15434	tph1	10.137	13.96	5.18238	3.90424	-1.27814	0	0.29777	1.16257	-0.380592
00000009_7.tif	predator	MT15434	tph1	11.609	14.696	5.18238	3.58197	-1.60041	0	0.29777	1.0666	-0.476555
00000009_7.tif	predator	MT15434	tph1	12.38	14.849	5.18238	3.47783	-1.70455	0	0.29777	1.03559	-0.507564
00000009_7.tif	predator	MT15434	tph1	8.769	13.04	5.18238	4.64079	-0.541596	0	0.29777	1.38189	-0.161271
00000009_7.tif	predator	MT15434	tph1	9.526	13.193	5.18238	4.00205	-1.18033	0	0.29777	1.19169	-0.351467
00000009_7.tif	predator	MT15434	tph1	10.589	12.964	5.18238	2.95632	-2.22607	0	0.29777	0.880302	-0.662856
00000009_7.tif	predator	MT15434	tph1	10.172	12.776	5.18238	3.24038	-1.942	0	0.29777	0.964889	-0.578268
00000009_7.tif	predator	MT15434	tph1	9.922	12.741	5.18238	3.45691	-1.72547	0	0.29777	1.02936	-0.513794
00000009_7.tif	predator	MT15434	tph1	9.616	12.464	5.18238	3.65654	-1.52584	0	0.29777	1.08881	-0.454349
00000009_7.tif	predator	MT15434	tph1	11.616	12.734	5.18238	1.98322	-3.19916	0	0.29777	0.590543	-0.952615
00000009_7.tif	predator	MT15434	tph1	12.13	12.568	5.18238	1.49774	-3.68464	0	0.29777	0.445982	-1.09718
00000009_7.tif	predator	MT15434	tph1	10.252	10.925	5.18238	2.92603	-2.25635	0	0.29777	0.871285	-0.671873
00000009_7.tif	predator	MT15434	tph1	9.689	11.967	5.18238	3.47918	-1.7032	0	0.29777	1.03599	-0.507163
00000009_7.tif	predator	MT15434	tph1	11.217	12.057	5.18238	2.00609	-3.17629	0	0.29777	0.597353	-0.945805
00000009_7.tif	predator	MT15434	tph1	11.509	11.939	5.18238	1.69229	-3.49009	0	0.29777	0.503912	-1.03925
00000009_7.tif	predator	MT15434	tph1	11.675	11.28	5.18238	1.46525	-3.71713	0	0.29777	0.436307	-1.10685
00000009_7.tif	predator	MT15434	tph1	12.245	11.425	5.18238	0.885443	-4.29694	0	0.29777	0.263658	-1.2795
00000009_7.tif	predator	MT15434	tph1	12.002	10.231	5.18238	1.66303	-3.51935	0	0.29777	0.4952	-1.04796
00000009_7.tif	predator	MT15434	tph1	12.28	9.87	5.18238	1.79677	-3.38561	0	0.29777	0.535025	-1.00813
00000009_7.tif	predator	MT15434	tph1	11.064	8.064	5.18238	3.96909	-1.21329	0	0.29777	1.18188	-0.361282
00000009_7.tif	predator	MT15434	tph1	12.55	9.099	5.18238	2.4244	-2.75798	0	0.29777	0.721914	-0.821244
00000009_7.tif	predator	MT15434	tph1	12.898	8.314	5.18238	3.14756	-2.03482	0	0.29777	0.937249	-0.605908
00000009_7.tif	predator	MT15434	tph1	13.023	8.217	5.18238	3.23777	-1.94461	0	0.29777	0.96411	-0.579047
00000009_7.tif	predator	MT15434	tph1	12.464	6.929	5.18238	4.57276	-0.609622	0	0.29777	1.36163	-0.181527
00000009_7.tif	predator	MT15434	tph1	13.248	6.679	5.18238	4.77546	-0.406923	0	0.29777	1.42199	-0.12117
00000009_7.tif	predator	MT15434	tph1	13.79	6.943	5.18238	4.55804	-0.624345	0	0.29777	1.35725	-0.185911
00000009_7.tif	predator	MT15434	tph1	13.762	7.575	5.18238	3.92916	-1.25322	0	0.29777	1.16999	-0.373171
00000009_7.tif	predator	MT15434	tph1	13.568	7.97	5.18238	3.51043	-1.67195	0	0.29777	1.0453	-0.497856
00000009_7.tif	predator	MT15434	tph1	13.359	9.248	5.18238	2.21686	-2.96552	0	0.29777	0.660114	-0.883043
00000009_7.tif	predator	MT15434	tph1	13.936	9.637	5.18238	1.98683	-3.19555	0	0.29777	0.591618	-0.951539
00000009_7.tif	predator	MT15434	tph1	14.658	9.144	5.18238	2.7688	-2.41358	0	0.29777	0.824466	-0.718692
00000009_7.tif	predator	MT15434	tph1	15.408	8.97	5.18238	3.36965	-1.81273	0	0.29777	1.00338	-0.539776
00000009_7.tif	predator	MT15434	tph1	14.13	10.464	5.18238	1.40646	-3.77592	0	0.29777	0.418801	-1.12436
00000009_7.tif	predator	MT15434	tph1	14.644	10.568	5.18238	1.75369	-3.42869	0	0.29777	0.522196	-1.02096
00000009_7.tif	predator	MT15434	tph1	13.054	11.207	5.18238	0.257472	-4.92491	0	0.29777	0.0766675	-1.46649
00000009_7.tif	predator	MT15434	tph1	15.241	12.318	5.18238	2.28135	-2.90103	0	0.29777	0.679317	-0.863841
00000009_7.tif	predator	MT15434	tph1	15.325	12.47	5.18238	2.41916	-2.76323	0	0.29777	0.720352	-0.822806
00000009_7.tif	predator	MT15434	tph1	12.616	14.314	5.18238	2.90681	-2.27558	0	0.29777	0.865559	-0.677598
00000009_7.tif	predator	MT15434	tph1	13.755	13.384	5.18238	2.02963	-3.15275	0	0.29777	0.604362	-0.938796
00000009_7.tif	predator	MT15434	tph1	13.839	13.377	5.18238	2.05048	-3.1319	0	0.29777	0.610571	-0.932587
00000009_7.tif	predator	MT15434	tph1	14.269	13.773	5.18238	2.58452	-2.59787	0	0.29777	0.769591	-0.773567
00000009_7.tif	predator	MT15434	tph1	15.79	13.377	5.18238	3.28289	-1.89949	0	0.29777	0.977547	-0.565611
00000009_7.tif	predator	MT15434	tph1	14.637	15.127	5.18238	3.97106	-1.21132	0	0.29777	1.18246	-0.360695
00000009_7.tif	predator	MT15434	tph1	13.13	15.533	5.18238	4.08	-1.10238	0	0.29777	1.2149	-0.328256
00000009_7.tif	predator	MT15434	tph1	13.234	15.929	5.18238	4.47721	-0.705173	0	0.29777	1.33318	-0.20998
00000009_7.tif	predator	MT15434	tph1	13.255	16.325	5.18238	4.8736	-0.308778	0	0.29777	1.45121	-0.0919449
00000009_7.tif	predator	MT15434	tph1	13.304	16.575	5.18238	5.12495	-0.0574269	0	0.29777	1.52606	-0.0171
00000009_7.tif	predator	MT15434	tph1	13.477	16.547	5.18238	5.10581	-0.0765765	0	0.29777	1.52036	-0.0228022
00000009_7.tif	predator	MT15434	tph1	13.693	16.325	5.18238	4.90442	-0.27796	0	0.29777	1.46039	-0.0827681
00000009_7.tif	predator	MT15434	tph1	14.325	15.95	5.18238	4.65307	-0.529314	0	0.29777	1.38554	-0.157614
00000009_7.tif	predator	MT15434	tph1	14.748	15.964	5.18238	4.79239	-0.389987	0	0.29777	1.42703	-0.116126
00000009_7.tif	predator	MT15434	tph1	16.873	13.724	5.18238	4.37807	-0.804312	0	0.29777	1.30366	-0.2395
00000009_7.tif	predator	MT15434	tph1	16.443	13.335	5.18238	3.81024	-1.37215	0	0.29777	1.13457	-0.408584
00000009_7.tif	predator	MT15434	tph1	15.977	13.231	5.18238	3.35659	-1.82579	0	0.29777	0.999492	-0.543666
00000009_7.tif	predator	MT15434	tph1	15.797	12.821	5.18238	2.99738	-2.185	0	0.29777	0.892531	-0.650627
00000009_7.tif	predator	MT15434	tph1	15.852	12.682	5.18238	2.98659	-2.19579	0	0.29777	0.889317	-0.653841
00000009_7.tif	predator	MT15434	tph1	16.797	12.981	5.18238	3.97262	-1.20977	0	0.29777	1.18293	-0.360232
00000009_7.tif	predator	MT15434	tph1	17.276	12.995	5.18238	4.42347	-0.758912	0	0.29777	1.31718	-0.225981
00000009_7.tif	predator	MT15434	tph1	17.644	10.818	5.18238	4.55845	-0.623937	0	0.29777	1.35737	-0.18579
00000009_7.tif	predator	MT15434	tph1	17.665	10.068	5.18238	4.74178	-0.440604	0	0.29777	1.41196	-0.131199
00000009_7.tif	predator	MT15434	tph1	18.332	8.984	5.18238	5.75819	0.57581	1	0.29777	1.71462	0.171459
00000009_7.tif	predator	MT15434	tph1	16.165	8.033	5.18238	4.57249	-0.609896	0	0.29777	1.36155	-0.181609
00000009_7.tif	predator	MT15434	tph1	19.286	3.776	5.18238	9.84036	4.65798	1	0.29777	2.93016	1.38701
0000009_15.tif	predator	N2	wt	6.333	9.469	5.39594	9.24967	3.85373	1	0.29777	2.75427	1.14753
0000009_15.tif	predator	N2	wt	5.828	15.394	5.39594	10.1089	4.71297	1	0.29777	3.01013	1.40338
0000009_15.tif	predator	N2	wt	5.981	15.533	5.39594	10.0168	4.62084	1	0.29777	2.9827	1.37595
0000009_15.tif	predator	N2	wt	6.807	15.359	5.39594	9.1864	3.79046	1	0.29777	2.73543	1.12869
0000009_15.tif	predator	N2	wt	7.998	18.439	5.39594	9.84679	4.45085	1	0.29777	2.93208	1.32533
0000009_15.tif	predator	N2	wt	8.623	18.182	5.39594	9.21444	3.8185	1	0.29777	2.74378	1.13704
0000009_15.tif	predator	N2	wt	9.693	17.481	5.39594	7.96011	2.56417	1	0.29777	2.37028	0.763533
0000009_15.tif	predator	N2	wt	9.797	17.418	5.39594	7.84229	2.44635	1	0.29777	2.3352	0.72845
0000009_15.tif	predator	N2	wt	9.741	17.21	5.39594	7.73499	2.33905	1	0.29777	2.30325	0.696499
0000009_15.tif	predator	N2	wt	10.186	17.342	5.39594	7.5193	2.12337	1	0.29777	2.23902	0.632275
0000009_15.tif	predator	N2	wt	10.366	17.425	5.39594	7.46076	2.06483	1	0.29777	2.22159	0.614844
0000009_15.tif	predator	N2	wt	10.582	17.398	5.39594	7.29959	1.90365	1	0.29777	2.1736	0.566851
0000009_15.tif	predator	N2	wt	10.714	16.668	5.39594	6.6662	1.27026	1	0.29777	1.98499	0.378247
0000009_15.tif	predator	N2	wt	13.061	15.967	5.39594	4.71088	-0.685052	0	0.29777	1.40276	-0.203988
0000009_15.tif	predator	N2	wt	13.158	15.863	5.39594	4.57359	-0.822345	0	0.29777	1.36188	-0.24487
0000009_15.tif	predator	N2	wt	10.825	14.939	5.39594	5.44372	0.0477821	1	0.29777	1.62098	0.0142281
0000009_15.tif	predator	N2	wt	10.165	14.641	5.39594	5.84608	0.450148	1	0.29777	1.74079	0.134041
0000009_15.tif	predator	N2	wt	10.95	14.592	5.39594	5.14645	-0.249485	0	0.29777	1.53246	-0.074289
0000009_15.tif	predator	N2	wt	10.797	12.453	5.39594	4.52958	-0.866351	0	0.29777	1.34877	-0.257973
0000009_15.tif	predator	N2	wt	7.929	12.3	5.39594	7.36818	1.97224	1	0.29777	2.19402	0.587275
0000009_15.tif	predator	N2	wt	7.95	12.071	5.39594	7.33557	1.93964	1	0.29777	2.18431	0.577566
0000009_15.tif	predator	N2	wt	8.109	12.106	5.39594	7.17802	1.78209	1	0.29777	2.1374	0.530652
0000009_15.tif	predator	N2	wt	8.165	11.995	5.39594	7.11835	1.72242	1	0.29777	2.11963	0.512884
0000009_15.tif	predator	N2	wt	7.394	13.481	5.39594	8.06166	2.66572	1	0.29777	2.40052	0.793772
0000009_15.tif	predator	N2	wt	7.769	11.585	5.39594	7.51543	2.11949	1	0.29777	2.23787	0.631121
0000009_15.tif	predator	N2	wt	7.693	11.335	5.39594	7.60298	2.20704	1	0.29777	2.26394	0.657191
0000009_15.tif	predator	N2	wt	10.068	7.915	5.39594	6.50861	1.11267	1	0.29777	1.93807	0.33132
0000009_15.tif	predator	N2	wt	10.401	7.72	5.39594	6.36858	0.972648	1	0.29777	1.89637	0.289625
0000009_15.tif	predator	N2	wt	10.366	7.616	5.39594	6.46248	1.06654	1	0.29777	1.92433	0.317585
0000009_15.tif	predator	N2	wt	10.297	7.491	5.39594	6.59631	1.20037	1	0.29777	1.96418	0.357435
0000009_15.tif	predator	N2	wt	12.88	7.054	5.39594	5.32948	-0.0664551	0	0.29777	1.58696	-0.0197883
0000009_15.tif	predator	N2	wt	12.95	6.908	5.39594	5.4298	0.0338687	1	0.29777	1.61683	0.0100851
0000009_15.tif	predator	N2	wt	13.22	6.964	5.39594	5.26791	-0.128031	0	0.29777	1.56862	-0.0381237
0000009_15.tif	predator	N2	wt	9.234	4.349	5.39594	9.60534	4.20941	1	0.29777	2.86018	1.25343
0000009_15.tif	predator	N2	wt	11.776	5.634	5.39594	7.10301	1.70707	1	0.29777	2.11506	0.508315
0000009_15.tif	predator	N2	wt	12.477	5.828	5.39594	6.60838	1.21244	1	0.29777	1.96778	0.361029
0000009_15.tif	predator	N2	wt	12.602	5.863	5.39594	6.52439	1.12845	1	0.29777	1.94277	0.336019
0000009_15.tif	predator	N2	wt	13.241	5.731	5.39594	6.41406	1.01812	1	0.29777	1.90991	0.303167
0000009_15.tif	predator	N2	wt	13.241	5.481	5.39594	6.65155	1.25562	1	0.29777	1.98063	0.373885
0000009_15.tif	predator	N2	wt	13.026	5.293	5.39594	6.898	1.50206	1	0.29777	2.05402	0.447269
0000009_15.tif	predator	N2	wt	12.894	4.495	5.39594	7.69651	2.30057	1	0.29777	2.29179	0.685042
0000009_15.tif	predator	N2	wt	14.769	2.849	5.39594	8.97761	3.58168	1	0.29777	2.67326	1.06652
0000009_15.tif	predator	N2	wt	14.88	2.842	5.39594	8.97896	3.58302	1	0.29777	2.67366	1.06692
0000009_15.tif	predator	N2	wt	15.401	3.845	5.39594	7.9679	2.57197	1	0.29777	2.3726	0.765855
0000009_15.tif	predator	N2	wt	14.97	5.033	5.39594	6.78613	1.39019	1	0.29777	2.02071	0.413958
0000009_15.tif	predator	N2	wt	14.366	5.526	5.39594	6.35225	0.95631	1	0.29777	1.89151	0.28476
0000009_15.tif	predator	N2	wt	14.526	5.512	5.39594	6.34508	0.949143	1	0.29777	1.88937	0.282626
0000009_15.tif	predator	N2	wt	14.894	5.727	5.39594	6.09729	0.701358	1	0.29777	1.81559	0.208843
0000009_15.tif	predator	N2	wt	15.7	5.957	5.39594	5.86997	0.474037	1	0.29777	1.7479	0.141154
0000009_15.tif	predator	N2	wt	14.998	7.648	5.39594	4.17361	-1.22233	0	0.29777	1.24277	-0.363973
0000009_15.tif	predator	N2	wt	15.075	7.627	5.39594	4.19007	-1.20587	0	0.29777	1.24768	-0.359072
0000009_15.tif	predator	N2	wt	15.415	7.384	5.39594	4.43003	-0.965909	0	0.29777	1.31913	-0.287619
0000009_15.tif	predator	N2	wt	15.54	7.523	5.39594	4.29681	-1.09912	0	0.29777	1.27946	-0.327286
0000009_15.tif	predator	N2	wt	14.484	10.905	5.39594	1.20742	-4.18852	0	0.29777	0.359533	-1.24721
0000009_15.tif	predator	N2	wt	15.297	11.773	5.39594	0.0421545	-5.35378	0	0.29777	0.0125523	-1.5942
0000009_15.tif	predator	N2	wt	15.686	11.821	5.39594	0.4051	-4.99084	0	0.29777	0.120627	-1.48612
0000009_15.tif	predator	N2	wt	15.714	11.738	5.39594	0.439278	-4.95666	0	0.29777	0.130804	-1.47594
0000009_15.tif	predator	N2	wt	17.707	9.766	5.39594	3.17358	-2.22236	0	0.29777	0.944996	-0.661752
0000009_15.tif	predator	N2	wt	17.707	9.543	5.39594	3.32172	-2.07421	0	0.29777	0.989109	-0.617639
0000009_15.tif	predator	N2	wt	13.686	11.95	5.39594	1.60096	-3.79498	0	0.29777	0.476717	-1.13003
0000009_15.tif	predator	N2	wt	13.762	12.068	5.39594	1.54042	-3.85551	0	0.29777	0.458691	-1.14806
0000009_15.tif	predator	N2	wt	14.679	12.415	5.39594	0.852064	-4.54387	0	0.29777	0.253719	-1.35303
0000009_15.tif	predator	N2	wt	16.47	16.179	5.39594	4.52597	-0.869965	0	0.29777	1.3477	-0.25905
0000009_15.tif	predator	N2	wt	16.498	16.102	5.39594	4.45928	-0.936655	0	0.29777	1.32784	-0.278908
0000009_15.tif	predator	N2	wt	16.575	16.214	5.39594	4.58825	-0.807686	0	0.29777	1.36624	-0.240505
0000009_15.tif	predator	N2	wt	17.151	15.936	5.39594	4.52816	-0.867771	0	0.29777	1.34835	-0.258396
0000009_15.tif	predator	N2	wt	17.345	15.651	5.39594	4.35867	-1.03726	0	0.29777	1.29788	-0.308866
0000009_15.tif	predator	N2	wt	17.328	19.401	5.39594	7.86022	2.46429	1	0.29777	2.34054	0.733791
0000009_15.tif	predator	N2	wt	19.161	19.714	5.39594	8.80318	3.40725	1	0.29777	2.62132	1.01458
0000009_15.tif	predator	N2	wt	19.026	19.568	5.39594	8.61281	3.21688	1	0.29777	2.56464	0.95789
0000009_15.tif	predator	N2	wt	19.464	17.401	5.39594	6.981	1.58507	1	0.29777	2.07873	0.471986
0000009_15.tif	predator	N2	wt	19.464	17.307	5.39594	6.90598	1.51004	1	0.29777	2.05639	0.449645
0000009_15.tif	predator	N2	wt	19.432	17.203	5.39594	6.80395	1.40801	1	0.29777	2.02601	0.419263
0000009_15.tif	predator	N2	wt	20.259	10.863	5.39594	5.06765	-0.328285	0	0.29777	1.50899	-0.0977534
0000009_15.tif	predator	N2	wt	20.634	10.418	5.39594	5.53153	0.135596	1	0.29777	1.64712	0.0403764
0000009_15.tif	predator	N2	wt	20.87	10.502	5.39594	5.74047	0.344536	1	0.29777	1.70934	0.102593
0000009_15.tif	predator	N2	wt	20.009	12.21	5.39594	4.74472	-0.651214	0	0.29777	1.41284	-0.193912
0000009_15.tif	predator	N2	wt	20.182	12.168	5.39594	4.91391	-0.482023	0	0.29777	1.46322	-0.143532
0000009_15.tif	predator	N2	wt	19.578	12.891	5.39594	4.4304	-0.965535	0	0.29777	1.31924	-0.287507
0000009_15.tif	predator	N2	wt	18.439	3.707	5.39594	8.6985	3.30257	1	0.29777	2.59015	0.983406
0000009_15.tif	predator	N2	wt	23.071	16.415	5.39594	9.0483	3.65236	1	0.29777	2.69431	1.08756
0000009_15.tif	predator	N2	wt	22.196	15.394	5.39594	7.78768	2.39174	1	0.29777	2.31894	0.712189
0000009_15.tif	predator	N2	wt	21.995	15.248	5.39594	7.54214	2.14621	1	0.29777	2.24582	0.639076
0000009_15.tif	predator	N2	wt	23.439	15.512	5.39594	8.95784	3.56191	1	0.29777	2.66738	1.06063
0000009_15.tif	predator	N2	wt	23.863	15.415	5.39594	9.30765	3.91171	1	0.29777	2.77154	1.16479
0000009_15.tif	predator	N2	wt	24.182	15.339	5.39594	9.57432	4.17838	1	0.29777	2.85094	1.2442
0000009_15.tif	predator	N2	wt	23.932	14.811	5.39594	9.15608	3.76014	1	0.29777	2.72641	1.11966
0000009_15.tif	predator	N2	wt	23.946	14.644	5.39594	9.11605	3.72012	1	0.29777	2.71449	1.10774
0000009_15.tif	predator	N2	wt	24.064	12.564	5.39594	8.81513	3.4192	1	0.29777	2.62488	1.01813
00000011_2.tif	control	MT13113	tdc1	13.333	16.323	5.1354	4.37587	-0.759523	0	0.29777	1.303	-0.226163
00000011_2.tif	control	MT13113	tdc1	13.224	16.373	5.1354	4.45138	-0.684014	0	0.29777	1.32549	-0.203679
00000011_2.tif	control	MT13113	tdc1	13.293	16.109	5.1354	4.17852	-0.956877	0	0.29777	1.24424	-0.284929
00000011_2.tif	control	MT13113	tdc1	13.335	16.075	5.1354	4.13492	-1.00047	0	0.29777	1.23126	-0.29791
00000011_2.tif	control	MT13113	tdc1	13.543	15.825	5.1354	3.84314	-1.29226	0	0.29777	1.14437	-0.384795
00000011_2.tif	control	MT13113	tdc1	13.002	15.408	5.1354	3.60657	-1.52883	0	0.29777	1.07393	-0.455238
00000011_2.tif	control	MT13113	tdc1	11.96	16.332	5.1354	4.89605	-0.239346	0	0.29777	1.4579	-0.0712701
00000011_2.tif	control	MT13113	tdc1	11.356	15.755	5.1354	4.76146	-0.373938	0	0.29777	1.41782	-0.111347
00000011_2.tif	control	MT13113	tdc1	11.467	15.665	5.1354	4.62157	-0.513824	0	0.29777	1.37617	-0.153001
00000011_2.tif	control	MT13113	tdc1	10.773	15.061	5.1354	4.68002	-0.45538	0	0.29777	1.39357	-0.135599
00000011_2.tif	control	MT13113	tdc1	11.148	14.491	5.1354	4.0324	-1.103	0	0.29777	1.20073	-0.328439
00000011_2.tif	control	MT13113	tdc1	11.342	14.214	5.1354	3.71254	-1.42285	0	0.29777	1.10548	-0.423683
00000011_2.tif	control	MT13113	tdc1	11.467	14.082	5.1354	3.53448	-1.60092	0	0.29777	1.05246	-0.476705
00000011_2.tif	control	MT13113	tdc1	10.495	13.915	5.1354	4.29504	-0.840357	0	0.29777	1.27893	-0.250233
00000011_2.tif	control	MT13113	tdc1	10.557	13.845	5.1354	4.20917	-0.926227	0	0.29777	1.25336	-0.275802
00000011_2.tif	control	MT13113	tdc1	10.425	13.804	5.1354	4.31264	-0.822756	0	0.29777	1.28417	-0.244992
00000011_2.tif	control	MT13113	tdc1	10.002	13.387	5.1354	4.56615	-0.569246	0	0.29777	1.35966	-0.169504
00000011_2.tif	control	MT13113	tdc1	10.384	13.109	5.1354	4.12327	-1.01212	0	0.29777	1.22779	-0.30138
00000011_2.tif	control	MT13113	tdc1	10.564	13.227	5.1354	3.98189	-1.15351	0	0.29777	1.18569	-0.34348
00000011_2.tif	control	MT13113	tdc1	10.703	13.686	5.1354	4.01065	-1.12474	0	0.29777	1.19425	-0.334914
00000011_2.tif	control	MT13113	tdc1	10.828	13.727	5.1354	3.91368	-1.22171	0	0.29777	1.16538	-0.363789
00000011_2.tif	control	MT13113	tdc1	10.911	13.595	5.1354	3.78362	-1.35178	0	0.29777	1.12665	-0.402518
00000011_2.tif	control	MT13113	tdc1	11.009	13.929	5.1354	3.84379	-1.29161	0	0.29777	1.14456	-0.384603
00000011_2.tif	control	MT13113	tdc1	11.231	13.512	5.1354	3.45767	-1.67773	0	0.29777	1.02959	-0.499578
00000011_2.tif	control	MT13113	tdc1	11.259	13.116	5.1354	3.28593	-1.84947	0	0.29777	0.97845	-0.550717
00000011_2.tif	control	MT13113	tdc1	13.446	13.179	5.1354	1.4444	-3.691	0	0.29777	0.430098	-1.09907
00000011_2.tif	control	MT13113	tdc1	12.405	13.026	5.1354	2.1884	-2.94699	0	0.29777	0.651641	-0.877526
00000011_2.tif	control	MT13113	tdc1	12.599	12.769	5.1354	1.90751	-3.22789	0	0.29777	0.567999	-0.961168
00000011_2.tif	control	MT13113	tdc1	13.509	12.394	5.1354	0.923578	-4.21182	0	0.29777	0.275014	-1.25415
00000011_2.tif	control	MT13113	tdc1	12.946	11.665	5.1354	1.4861	-3.64929	0	0.29777	0.442517	-1.08665
00000011_2.tif	control	MT13113	tdc1	12.939	11.547	5.1354	1.5293	-3.60609	0	0.29777	0.455381	-1.07379
00000011_2.tif	control	MT13113	tdc1	12.655	11.47	5.1354	1.82264	-3.31276	0	0.29777	0.542727	-0.98644
00000011_2.tif	control	MT13113	tdc1	12.03	12.116	5.1354	2.34539	-2.79	0	0.29777	0.698388	-0.830779
00000011_2.tif	control	MT13113	tdc1	11.911	12.227	5.1354	2.46881	-2.66659	0	0.29777	0.735137	-0.79403
00000011_2.tif	control	MT13113	tdc1	11.557	11.262	5.1354	2.93238	-2.20302	0	0.29777	0.873174	-0.655992
00000011_2.tif	control	MT13113	tdc1	11.773	10.825	5.1354	2.88581	-2.24958	0	0.29777	0.859308	-0.669859
00000011_2.tif	control	MT13113	tdc1	10.516	11.3	5.1354	3.93566	-1.19974	0	0.29777	1.17192	-0.357246
00000011_2.tif	control	MT13113	tdc1	10.439	11.148	5.1354	4.04323	-1.09216	0	0.29777	1.20395	-0.325214
00000011_2.tif	control	MT13113	tdc1	9.648	11.009	5.1354	4.84527	-0.290128	0	0.29777	1.44278	-0.0863913
00000011_2.tif	control	MT13113	tdc1	9.731	10.953	5.1354	4.77715	-0.358249	0	0.29777	1.42249	-0.106676
00000011_2.tif	control	MT13113	tdc1	9.578	10.849	5.1354	4.9507	-0.184701	0	0.29777	1.47417	-0.0549983
00000011_2.tif	control	MT13113	tdc1	9.648	10.682	5.1354	4.92741	-0.207982	0	0.29777	1.46724	-0.0619308
00000011_2.tif	control	MT13113	tdc1	10.064	10.363	5.1354	4.63776	-0.497636	0	0.29777	1.38099	-0.148181
00000011_2.tif	control	MT13113	tdc1	10.155	10.266	5.1354	4.5906	-0.544792	0	0.29777	1.36694	-0.162223
00000011_2.tif	control	MT13113	tdc1	10.175	10.113	5.1354	4.63482	-0.500571	0	0.29777	1.38011	-0.149055
00000011_2.tif	control	MT13113	tdc1	10.863	10.016	5.1354	4.07006	-1.06534	0	0.29777	1.21194	-0.317225
00000011_2.tif	control	MT13113	tdc1	10.606	9.453	5.1354	4.59018	-0.545215	0	0.29777	1.36682	-0.162349
00000011_2.tif	control	MT13113	tdc1	12.342	8.21	5.1354	4.3653	-0.770094	0	0.29777	1.29986	-0.229311
00000011_2.tif	control	MT13113	tdc1	13.703	8.585	5.1354	3.55214	-1.58325	0	0.29777	1.05772	-0.471445
00000011_2.tif	control	MT13113	tdc1	13.53	7.911	5.1354	4.24691	-0.888483	0	0.29777	1.2646	-0.264564
00000011_2.tif	control	MT13113	tdc1	13.148	7.939	5.1354	4.31225	-0.823148	0	0.29777	1.28406	-0.245109
00000011_2.tif	control	MT13113	tdc1	11.585	7.856	5.1354	5.0564	-0.0789952	0	0.29777	1.50564	-0.0235224
00000011_2.tif	control	MT13113	tdc1	10.571	7.46	5.1354	5.97915	0.84375	1	0.29777	1.78041	0.251243
00000011_2.tif	control	MT13113	tdc1	10.634	7.252	5.1354	6.10222	0.966827	1	0.29777	1.81706	0.287892
00000011_2.tif	control	MT13113	tdc1	11.314	6.78	5.1354	6.11437	0.978978	1	0.29777	1.82068	0.29151
00000011_2.tif	control	MT13113	tdc1	11.905	6.474	5.1354	6.11962	0.98422	1	0.29777	1.82224	0.293071
00000011_2.tif	control	MT13113	tdc1	11.786	6.418	5.1354	6.21948	1.08409	1	0.29777	1.85197	0.322808
00000011_2.tif	control	MT13113	tdc1	12.564	6.217	5.1354	6.12964	0.994242	1	0.29777	1.82522	0.296055
00000011_2.tif	control	MT13113	tdc1	12.627	6.085	5.1354	6.23792	1.10252	1	0.29777	1.85747	0.328299
00000011_2.tif	control	MT13113	tdc1	12.634	5.974	5.1354	6.34262	1.20723	1	0.29777	1.88864	0.359476
00000011_2.tif	control	MT13113	tdc1	12.161	5.328	5.1354	7.09907	1.96368	1	0.29777	2.11389	0.584724
00000011_2.tif	control	MT13113	tdc1	10.974	4.627	5.1354	8.18595	3.05055	1	0.29777	2.43753	0.908362
00000011_2.tif	control	MT13113	tdc1	11.488	4.474	5.1354	8.12893	2.99354	1	0.29777	2.42055	0.891386
00000011_2.tif	control	MT13113	tdc1	11.717	3.842	5.1354	8.64953	3.51413	1	0.29777	2.57557	1.0464
00000011_2.tif	control	MT13113	tdc1	11.592	3.717	5.1354	8.80726	3.67186	1	0.29777	2.62254	1.09337
00000011_2.tif	control	MT13113	tdc1	14.325	7.116	5.1354	4.95725	-0.178144	0	0.29777	1.47612	-0.0530459
00000011_2.tif	control	MT13113	tdc1	14.297	6.964	5.1354	5.1096	-0.0258006	0	0.29777	1.52148	-0.00768266
00000011_2.tif	control	MT13113	tdc1	14.464	7.061	5.1354	5.01279	-0.122606	0	0.29777	1.49266	-0.0365084
00000011_2.tif	control	MT13113	tdc1	14.554	6.248	5.1354	5.82775	0.692354	1	0.29777	1.73533	0.206162
00000011_2.tif	control	MT13113	tdc1	15.991	6.727	5.1354	5.58491	0.44951	1	0.29777	1.66302	0.133851
00000011_2.tif	control	MT13113	tdc1	16.811	6.748	5.1354	5.85574	0.720347	1	0.29777	1.74366	0.214498
00000011_2.tif	control	MT13113	tdc1	17.505	6.345	5.1354	6.52739	1.392	1	0.29777	1.94366	0.414496
00000011_2.tif	control	MT13113	tdc1	17.491	6.165	5.1354	6.67937	1.54397	1	0.29777	1.98891	0.459748
00000011_2.tif	control	MT13113	tdc1	17.616	6.186	5.1354	6.72018	1.58479	1	0.29777	2.00107	0.471902
00000011_2.tif	control	MT13113	tdc1	17.797	6.207	5.1354	6.79117	1.65578	1	0.29777	2.02221	0.493041
00000011_2.tif	control	MT13113	tdc1	18.13	5.79	5.1354	7.31957	2.18417	1	0.29777	2.17955	0.650382
00000011_2.tif	control	MT13113	tdc1	18.679	5.7	5.1354	7.69022	2.55483	1	0.29777	2.28992	0.760751
00000011_2.tif	control	MT13113	tdc1	18.776	5.672	5.1354	7.76799	2.63259	1	0.29777	2.31307	0.783906
00000011_2.tif	control	MT13113	tdc1	18.116	6.714	5.1354	6.53559	1.4002	1	0.29777	1.9461	0.416936
00000011_2.tif	control	MT13113	tdc1	18.123	6.859	5.1354	6.42132	1.28592	1	0.29777	1.91208	0.382908
00000011_2.tif	control	MT13113	tdc1	18.13	7.491	5.1354	5.92408	0.788686	1	0.29777	1.76401	0.234847
00000011_2.tif	control	MT13113	tdc1	17.95	7.54	5.1354	5.7731	0.637707	1	0.29777	1.71906	0.18989
00000011_2.tif	control	MT13113	tdc1	19.04	6.936	5.1354	6.93909	1.8037	1	0.29777	2.06625	0.537086
00000011_2.tif	control	MT13113	tdc1	15.533	7.571	5.1354	4.64854	-0.486851	0	0.29777	1.3842	-0.14497
00000011_2.tif	control	MT13113	tdc1	15.464	7.689	5.1354	4.51723	-0.618165	0	0.29777	1.3451	-0.184071
00000011_2.tif	control	MT13113	tdc1	14.047	9.002	5.1354	3.08847	-2.04693	0	0.29777	0.919653	-0.609514
00000011_2.tif	control	MT13113	tdc1	15.679	7.717	5.1354	4.54699	-0.588402	0	0.29777	1.35396	-0.175209
00000011_2.tif	control	MT13113	tdc1	15.79	7.773	5.1354	4.52683	-0.608562	0	0.29777	1.34796	-0.181212
00000011_2.tif	control	MT13113	tdc1	15.957	7.668	5.1354	4.68046	-0.454931	0	0.29777	1.3937	-0.135465
00000011_2.tif	control	MT13113	tdc1	13.929	10.22	5.1354	1.90592	-3.22948	0	0.29777	0.567525	-0.961642
00000011_2.tif	control	MT13113	tdc1	14.068	10.783	5.1354	1.32603	-3.80937	0	0.29777	0.394851	-1.13432
00000011_2.tif	control	MT13113	tdc1	14.207	11.38	5.1354	0.713073	-4.42232	0	0.29777	0.212332	-1.31684
00000011_2.tif	control	MT13113	tdc1	14.915	9.318	5.1354	2.80742	-2.32797	0	0.29777	0.835966	-0.6932
00000011_2.tif	control	MT13113	tdc1	14.977	9.179	5.1354	2.95595	-2.17945	0	0.29777	0.880193	-0.648974
00000011_2.tif	control	MT13113	tdc1	15.123	9.512	5.1354	2.668	-2.4674	0	0.29777	0.79445	-0.734716
00000011_2.tif	control	MT13113	tdc1	15.311	9.394	5.1354	2.8378	-2.29759	0	0.29777	0.845013	-0.684154
00000011_2.tif	control	MT13113	tdc1	15.116	10.325	5.1354	1.89857	-3.23682	0	0.29777	0.565339	-0.963828
00000011_2.tif	control	MT13113	tdc1	14.693	11.054	5.1354	1.06747	-4.06793	0	0.29777	0.31786	-1.21131
00000011_2.tif	control	MT13113	tdc1	14.644	11.22	5.1354	0.89441	-4.24099	0	0.29777	0.266329	-1.26284
00000011_2.tif	control	MT13113	tdc1	14.679	11.679	5.1354	0.497646	-4.63775	0	0.29777	0.148184	-1.38098
00000011_2.tif	control	MT13113	tdc1	15.026	11.012	5.1354	1.2448	-3.8906	0	0.29777	0.370663	-1.1585
00000011_2.tif	control	MT13113	tdc1	15.165	10.894	5.1354	1.4192	-3.71619	0	0.29777	0.422596	-1.10657
00000011_2.tif	control	MT13113	tdc1	16.38	9.484	5.1354	3.27459	-1.86081	0	0.29777	0.975075	-0.554092
00000011_2.tif	control	MT13113	tdc1	16.762	9.234	5.1354	3.70914	-1.42626	0	0.29777	1.10447	-0.424697
00000011_2.tif	control	MT13113	tdc1	16.672	8.707	5.1354	4.07507	-1.06033	0	0.29777	1.21343	-0.315734
00000011_2.tif	control	MT13113	tdc1	17.595	9.512	5.1354	4.11426	-1.02114	0	0.29777	1.2251	-0.304064
00000011_2.tif	control	MT13113	tdc1	16.318	10.776	5.1354	2.33612	-2.79928	0	0.29777	0.695627	-0.83354
00000011_2.tif	control	MT13113	tdc1	18.061	10.123	5.1354	4.17002	-0.965373	0	0.29777	1.24171	-0.287459
00000011_2.tif	control	MT13113	tdc1	18.637	9.97	5.1354	4.7526	-0.382791	0	0.29777	1.41518	-0.113984
00000011_2.tif	control	MT13113	tdc1	18.616	9.866	5.1354	4.78089	-0.354504	0	0.29777	1.42361	-0.105561
00000011_2.tif	control	MT13113	tdc1	18.776	9.769	5.1354	4.96762	-0.167779	0	0.29777	1.47921	-0.0499596
00000011_2.tif	control	MT13113	tdc1	18.839	9.922	5.1354	4.95521	-0.180187	0	0.29777	1.47551	-0.0536543
00000011_2.tif	control	MT13113	tdc1	18.707	9.582	5.1354	4.99713	-0.138266	0	0.29777	1.488	-0.0411716
00000011_2.tif	control	MT13113	tdc1	19.332	10.505	5.1354	5.19908	0.0636878	1	0.29777	1.54813	0.0189643
00000011_2.tif	control	MT13113	tdc1	19.318	10.693	5.1354	5.13202	-0.00337411	0	0.29777	1.52816	-0.00100471
00000011_2.tif	control	MT13113	tdc1	17.748	10.609	5.1354	3.67701	-1.45838	0	0.29777	1.0949	-0.434263
00000011_2.tif	control	MT13113	tdc1	17.686	10.72	5.1354	3.57678	-1.55862	0	0.29777	1.06506	-0.46411
00000011_2.tif	control	MT13113	tdc1	17.804	10.693	5.1354	3.69627	-1.43912	0	0.29777	1.10064	-0.428527
00000011_2.tif	control	MT13113	tdc1	17.693	10.908	5.1354	3.51658	-1.61881	0	0.29777	1.04713	-0.482034
00000011_2.tif	control	MT13113	tdc1	14.297	12.863	5.1354	0.793841	-4.34155	0	0.29777	0.236382	-1.29278
00000011_2.tif	control	MT13113	tdc1	14.38	13.016	5.1354	0.943013	-4.19238	0	0.29777	0.280801	-1.24837
00000011_2.tif	control	MT13113	tdc1	14.394	13.738	5.1354	1.66511	-3.47029	0	0.29777	0.495819	-1.03335
00000011_2.tif	control	MT13113	tdc1	14.505	13.613	5.1354	1.54548	-3.58992	0	0.29777	0.460197	-1.06897
00000011_2.tif	control	MT13113	tdc1	15.151	11.981	5.1354	0.781435	-4.35396	0	0.29777	0.232688	-1.29648
00000011_2.tif	control	MT13113	tdc1	15.63	11.856	5.1354	1.27362	-3.86177	0	0.29777	0.379247	-1.14992
00000011_2.tif	control	MT13113	tdc1	15.727	11.585	5.1354	1.43738	-3.69802	0	0.29777	0.428007	-1.10116
00000011_2.tif	control	MT13113	tdc1	15.866	11.578	5.1354	1.57102	-3.56438	0	0.29777	0.467803	-1.06136
00000011_2.tif	control	MT13113	tdc1	16.158	12.175	5.1354	1.78592	-3.34948	0	0.29777	0.531792	-0.997375
00000011_2.tif	control	MT13113	tdc1	16.401	11.793	5.1354	2.04526	-3.09014	0	0.29777	0.609016	-0.920151
00000011_2.tif	control	MT13113	tdc1	16.901	12.189	5.1354	2.52866	-2.60673	0	0.29777	0.75296	-0.776207
00000011_2.tif	control	MT13113	tdc1	17.165	12.523	5.1354	2.82606	-2.30934	0	0.29777	0.841515	-0.687652
00000011_2.tif	control	MT13113	tdc1	17.977	12.043	5.1354	3.60212	-1.53327	0	0.29777	1.0726	-0.456562
00000011_2.tif	control	MT13113	tdc1	17.915	11.856	5.1354	3.54664	-1.58875	0	0.29777	1.05608	-0.473082
00000011_2.tif	control	MT13113	tdc1	18.089	11.661	5.1354	3.73678	-1.39861	0	0.29777	1.1127	-0.416465
00000011_2.tif	control	MT13113	tdc1	18.22	11.828	5.1354	3.8528	-1.2826	0	0.29777	1.14725	-0.381919
00000011_2.tif	control	MT13113	tdc1	18.922	11.731	5.1354	4.55984	-0.575553	0	0.29777	1.35778	-0.171382
00000011_2.tif	control	MT13113	tdc1	18.991	11.564	5.1354	4.64398	-0.491417	0	0.29777	1.38284	-0.146329
00000011_2.tif	control	MT13113	tdc1	18.943	11.391	5.1354	4.61863	-0.516765	0	0.29777	1.37529	-0.153877
00000011_2.tif	control	MT13113	tdc1	17.63	12.936	5.1354	3.36746	-1.76793	0	0.29777	1.00273	-0.526438
00000011_2.tif	control	MT13113	tdc1	17.957	13.095	5.1354	3.72494	-1.41045	0	0.29777	1.10918	-0.41999
00000011_2.tif	control	MT13113	tdc1	18.012	13.2	5.1354	3.80761	-1.32779	0	0.29777	1.13379	-0.395375
00000011_2.tif	control	MT13113	tdc1	18.214	12.797	5.1354	3.90667	-1.22872	0	0.29777	1.16329	-0.365877
00000011_2.tif	control	MT13113	tdc1	18.582	13.012	5.1354	4.31052	-0.824877	0	0.29777	1.28354	-0.245624
00000011_2.tif	control	MT13113	tdc1	18.693	12.908	5.1354	4.39799	-0.737402	0	0.29777	1.30959	-0.219576
00000011_2.tif	control	MT13113	tdc1	18.748	13.04	5.1354	4.47864	-0.656756	0	0.29777	1.3336	-0.195562
00000011_2.tif	control	MT13113	tdc1	18.72	13.123	5.1354	4.47007	-0.665326	0	0.29777	1.33105	-0.198114
00000011_2.tif	control	MT13113	tdc1	15.325	14.675	5.1354	2.77	-2.3654	0	0.29777	0.824823	-0.704344
00000011_2.tif	control	MT13113	tdc1	13.783	15.349	5.1354	3.32906	-1.80634	0	0.29777	0.991294	-0.537873
00000011_2.tif	control	MT13113	tdc1	15.825	15.252	5.1354	3.49407	-1.64132	0	0.29777	1.04043	-0.488737
00000011_2.tif	control	MT13113	tdc1	16.227	15.46	5.1354	3.86027	-1.27513	0	0.29777	1.14947	-0.379695
00000011_2.tif	control	MT13113	tdc1	16.526	14.543	5.1354	3.27532	-1.86008	0	0.29777	0.975291	-0.553876
00000011_2.tif	control	MT13113	tdc1	16.748	14.425	5.1354	3.34111	-1.79428	0	0.29777	0.994883	-0.534284
00000011_2.tif	control	MT13113	tdc1	17.269	14.266	5.1354	3.63104	-1.50435	0	0.29777	1.08122	-0.447951
00000011_2.tif	control	MT13113	tdc1	17.387	14.467	5.1354	3.84752	-1.28788	0	0.29777	1.14567	-0.383492
00000011_2.tif	control	MT13113	tdc1	17.741	14.085	5.1354	3.92149	-1.2139	0	0.29777	1.1677	-0.361464
00000011_2.tif	control	MT13113	tdc1	17.818	14.495	5.1354	4.20955	-0.925843	0	0.29777	1.25348	-0.275688
00000011_2.tif	control	MT13113	tdc1	18.13	14.009	5.1354	4.2247	-0.910692	0	0.29777	1.25799	-0.271177
00000011_2.tif	control	MT13113	tdc1	18.241	14.3	5.1354	4.46156	-0.67384	0	0.29777	1.32852	-0.200649
00000011_2.tif	control	MT13113	tdc1	19.082	14.092	5.1354	5.12174	-0.0136571	0	0.29777	1.5251	-0.00406666
00000011_2.tif	control	MT13113	tdc1	19.477	14.849	5.1354	5.80832	0.672924	1	0.29777	1.72954	0.200377
00000011_2.tif	control	MT13113	tdc1	17.082	15.335	5.1354	4.23893	-0.89647	0	0.29777	1.26222	-0.266942
00000011_2.tif	control	MT13113	tdc1	17.547	15.356	5.1354	4.56505	-0.570347	0	0.29777	1.35933	-0.169832
00000011_2.tif	control	MT13113	tdc1	17.38	15.835	5.1354	4.81484	-0.320558	0	0.29777	1.43371	-0.0954524
00000011_2.tif	control	MT13113	tdc1	17.477	15.78	5.1354	4.83366	-0.301738	0	0.29777	1.43932	-0.0898484
00000011_2.tif	control	MT13113	tdc1	17.637	15.786	5.1354	4.94237	-0.193027	0	0.29777	1.47169	-0.0574776
00000011_2.tif	control	MT13113	tdc1	17.769	15.793	5.1354	5.03564	-0.0997594	0	0.29777	1.49946	-0.0297054
00000011_2.tif	control	MT13113	tdc1	17.915	15.842	5.1354	5.17078	0.0353835	1	0.29777	1.5397	0.0105361
00000011_2.tif	control	MT13113	tdc1	13.859	16.835	5.1354	4.78987	-0.345521	0	0.29777	1.42628	-0.102886
00000011_2.tif	control	MT13113	tdc1	14.214	17.002	5.1354	4.93163	-0.203767	0	0.29777	1.46849	-0.0606758
00000011_2.tif	control	MT13113	tdc1	15.345	16.606	5.1354	4.63562	-0.499774	0	0.29777	1.38035	-0.148818
00000011_2.tif	control	MT13113	tdc1	15.422	16.717	5.1354	4.76056	-0.374835	0	0.29777	1.41755	-0.111615
00000011_2.tif	control	MT13113	tdc1	15.505	16.585	5.1354	4.65135	-0.484047	0	0.29777	1.38503	-0.144135
00000011_2.tif	control	MT13113	tdc1	15.825	19.953	5.1354	8.0123	2.8769	1	0.29777	2.38582	0.856655
00000011_2.tif	control	MT13113	tdc1	17.165	20.134	5.1354	8.53017	3.39478	1	0.29777	2.54003	1.01086
00000011_2.tif	control	MT13113	tdc1	17.38	20.12	5.1354	8.58977	3.45438	1	0.29777	2.55778	1.02861
00000011_2.tif	control	MT13113	tdc1	18.929	18.377	5.1354	7.77685	2.64145	1	0.29777	2.31571	0.786545
00000011_2.tif	control	MT13113	tdc1	20.932	19.109	5.1354	9.61767	4.48227	1	0.29777	2.86385	1.33469
00000011_2.tif	control	MT13113	tdc1	19.797	9.939	5.1354	5.82684	0.691442	1	0.29777	1.73506	0.205891
00000011_2.tif	control	MT13113	tdc1	19.644	9.766	5.1354	5.75192	0.616526	1	0.29777	1.71275	0.183583
00000011_2.tif	control	MT13113	tdc1	19.783	9.752	5.1354	5.88502	0.749628	1	0.29777	1.75238	0.223217
00000011_2.tif	control	MT13113	tdc1	19.547	9.564	5.1354	5.74845	0.613053	1	0.29777	1.71172	0.182549
00000011_2.tif	control	MT13113	tdc1	19.623	8.196	5.1354	6.52477	1.38937	1	0.29777	1.94288	0.413714
00000011_2.tif	control	MT13113	tdc1	19.561	8.036	5.1354	6.57206	1.43666	1	0.29777	1.95696	0.427795
0000011_11.tif	predator	MT9455	tbh1	8.896	4.625	5.34395	8.88266	3.53871	1	0.29777	2.64499	1.05372
0000011_11.tif	predator	MT9455	tbh1	5.102	11.45	5.34395	8.84947	3.50551	1	0.29777	2.63511	1.04384
0000011_11.tif	predator	MT9455	tbh1	6.13	12.068	5.34395	7.80908	2.46513	1	0.29777	2.32531	0.734042
0000011_11.tif	predator	MT9455	tbh1	6.207	12.227	5.34395	7.7364	2.39245	1	0.29777	2.30367	0.7124
0000011_11.tif	predator	MT9455	tbh1	6.609	11.186	5.34395	7.36748	2.02353	1	0.29777	2.19381	0.602546
0000011_11.tif	predator	MT9455	tbh1	6.714	11.026	5.34395	7.28134	1.93739	1	0.29777	2.16816	0.576897
0000011_11.tif	predator	MT9455	tbh1	6.651	10.005	5.34395	7.53902	2.19507	1	0.29777	2.24489	0.653627
0000011_11.tif	predator	MT9455	tbh1	7.547	9.491	5.34395	6.84344	1.49949	1	0.29777	2.03777	0.446503
0000011_11.tif	predator	MT9455	tbh1	7.179	8.72	5.34395	7.48596	2.14201	1	0.29777	2.22909	0.637826
0000011_11.tif	predator	MT9455	tbh1	8.575	10.2	5.34395	5.63759	0.293639	1	0.29777	1.6787	0.0874368
0000011_11.tif	predator	MT9455	tbh1	8.568	10.38	5.34395	5.59145	0.247495	1	0.29777	1.66496	0.0736966
0000011_11.tif	predator	MT9455	tbh1	7.519	13.832	5.34395	6.69259	1.34864	1	0.29777	1.99285	0.401585
0000011_11.tif	predator	MT9455	tbh1	7.901	13.873	5.34395	6.33953	0.995576	1	0.29777	1.88772	0.296453
0000011_11.tif	predator	MT9455	tbh1	8.818	13.866	5.34395	5.47098	0.127026	1	0.29777	1.62909	0.0378245
0000011_11.tif	predator	MT9455	tbh1	8.908	13.734	5.34395	5.34102	-0.0029286	0	0.29777	1.5904	-0.000872051
0000011_11.tif	predator	MT9455	tbh1	12.439	21.307	5.34395	9.48816	4.14421	1	0.29777	2.82529	1.23402
0000011_11.tif	predator	MT9455	tbh1	11.328	19.231	5.34395	7.74596	2.40201	1	0.29777	2.30652	0.715247
0000011_11.tif	predator	MT9455	tbh1	11.425	19.127	5.34395	7.61557	2.27162	1	0.29777	2.26769	0.67642
0000011_11.tif	predator	MT9455	tbh1	11.738	19.321	5.34395	7.70381	2.35986	1	0.29777	2.29396	0.702695
0000011_11.tif	predator	MT9455	tbh1	11.689	19.175	5.34395	7.5784	2.23445	1	0.29777	2.25662	0.665352
0000011_11.tif	predator	MT9455	tbh1	12.03	18.536	5.34395	6.86834	1.52439	1	0.29777	2.04519	0.453917
0000011_11.tif	predator	MT9455	tbh1	12.155	18.273	5.34395	6.58113	1.23718	1	0.29777	1.95966	0.368396
0000011_11.tif	predator	MT9455	tbh1	12.113	18.023	5.34395	6.35278	1.00883	1	0.29777	1.89167	0.3004
0000011_11.tif	predator	MT9455	tbh1	12.002	17.981	5.34395	6.34555	1.00159	1	0.29777	1.88951	0.298245
0000011_11.tif	predator	MT9455	tbh1	10.599	17.648	5.34395	6.61461	1.27066	1	0.29777	1.96963	0.378363
0000011_11.tif	predator	MT9455	tbh1	10.53	17.009	5.34395	6.10979	0.765837	1	0.29777	1.81931	0.228043
0000011_11.tif	predator	MT9455	tbh1	10.335	16.96	5.34395	6.18078	0.836834	1	0.29777	1.84045	0.249184
0000011_11.tif	predator	MT9455	tbh1	9.502	14.234	5.34395	4.99497	-0.348982	0	0.29777	1.48735	-0.103916
0000011_11.tif	predator	MT9455	tbh1	9.571	14.033	5.34395	4.84352	-0.500428	0	0.29777	1.44226	-0.149012
0000011_11.tif	predator	MT9455	tbh1	11.161	13.241	5.34395	3.0675	-2.27645	0	0.29777	0.913409	-0.67786
0000011_11.tif	predator	MT9455	tbh1	11.252	13.193	5.34395	2.96473	-2.37922	0	0.29777	0.882808	-0.708461
0000011_11.tif	predator	MT9455	tbh1	11.474	12.595	5.34395	2.55009	-2.79386	0	0.29777	0.759339	-0.831929
0000011_11.tif	predator	MT9455	tbh1	9.939	12.533	5.34395	4.04302	-1.30093	0	0.29777	1.20389	-0.387378
0000011_11.tif	predator	MT9455	tbh1	9.009	12.016	5.34395	4.92962	-0.414333	0	0.29777	1.46789	-0.123376
0000011_11.tif	predator	MT9455	tbh1	9.016	11.835	5.34395	4.92308	-0.420873	0	0.29777	1.46594	-0.125323
0000011_11.tif	predator	MT9455	tbh1	9.134	10.932	5.34395	4.9082	-0.435748	0	0.29777	1.46152	-0.129753
0000011_11.tif	predator	MT9455	tbh1	9.314	11.21	5.34395	4.68096	-0.662993	0	0.29777	1.39385	-0.19742
0000011_11.tif	predator	MT9455	tbh1	9.481	11.571	5.34395	4.47208	-0.871866	0	0.29777	1.33165	-0.259616
0000011_11.tif	predator	MT9455	tbh1	9.481	10.911	5.34395	4.57379	-0.770158	0	0.29777	1.36194	-0.22933
0000011_11.tif	predator	MT9455	tbh1	9.842	11.196	5.34395	4.16267	-1.18129	0	0.29777	1.23952	-0.351751
0000011_11.tif	predator	MT9455	tbh1	9.953	11.849	5.34395	3.98599	-1.35796	0	0.29777	1.18691	-0.404359
0000011_11.tif	predator	MT9455	tbh1	10.043	11.578	5.34395	3.9116	-1.43235	0	0.29777	1.16476	-0.426511
0000011_11.tif	predator	MT9455	tbh1	10.175	11.217	5.34395	3.83145	-1.5125	0	0.29777	1.14089	-0.450377
0000011_11.tif	predator	MT9455	tbh1	10.175	10.932	5.34395	3.89515	-1.4488	0	0.29777	1.15986	-0.431409
0000011_11.tif	predator	MT9455	tbh1	11.627	9.734	5.34395	3.19348	-2.15047	0	0.29777	0.950924	-0.640345
0000011_11.tif	predator	MT9455	tbh1	11.821	9.679	5.34395	3.09593	-2.24802	0	0.29777	0.921874	-0.669394
0000011_11.tif	predator	MT9455	tbh1	11.96	9.686	5.34395	2.99733	-2.34662	0	0.29777	0.892515	-0.698753
0000011_11.tif	predator	MT9455	tbh1	11.495	7.693	5.34395	4.89778	-0.446168	0	0.29777	1.45841	-0.132855
0000011_11.tif	predator	MT9455	tbh1	11.3	7.561	5.34395	5.1105	-0.233454	0	0.29777	1.52175	-0.0695157
0000011_11.tif	predator	MT9455	tbh1	11.391	7.498	5.34395	5.11867	-0.225278	0	0.29777	1.52419	-0.067081
0000011_11.tif	predator	MT9455	tbh1	11.057	7.568	5.34395	5.23422	-0.10973	0	0.29777	1.55859	-0.0326744
0000011_11.tif	predator	MT9455	tbh1	9.231	4.273	5.34395	8.99489	3.65094	1	0.29777	2.67841	1.08714
0000011_11.tif	predator	MT9455	tbh1	9.148	4.092	5.34395	9.1926	3.84865	1	0.29777	2.73728	1.14601
0000011_11.tif	predator	MT9455	tbh1	9.398	3.523	5.34395	9.56158	4.21763	1	0.29777	2.84715	1.25588
0000011_11.tif	predator	MT9455	tbh1	15.696	4.592	5.34395	7.55343	2.20948	1	0.29777	2.24918	0.657916
0000011_11.tif	predator	MT9455	tbh1	13.717	5.686	5.34395	6.2559	0.911954	1	0.29777	1.86282	0.271553
0000011_11.tif	predator	MT9455	tbh1	13.877	5.852	5.34395	6.08631	0.742355	1	0.29777	1.81232	0.221051
0000011_11.tif	predator	MT9455	tbh1	13.918	5.714	5.34395	6.22403	0.880082	1	0.29777	1.85333	0.262062
0000011_11.tif	predator	MT9455	tbh1	13.967	5.63	5.34395	6.30807	0.964116	1	0.29777	1.87835	0.287085
0000011_11.tif	predator	MT9455	tbh1	13.946	6.095	5.34395	5.84301	0.499055	1	0.29777	1.73987	0.148604
0000011_11.tif	predator	MT9455	tbh1	14.481	12.72	5.34395	0.952036	-4.39191	0	0.29777	0.283488	-1.30778
0000011_11.tif	predator	MT9455	tbh1	14.766	12.811	5.34395	1.20321	-4.14074	0	0.29777	0.35828	-1.23299
0000011_11.tif	predator	MT9455	tbh1	13.078	13.45	5.34395	1.73947	-3.60448	0	0.29777	0.517961	-1.07331
0000011_11.tif	predator	MT9455	tbh1	13.245	13.443	5.34395	1.65689	-3.68706	0	0.29777	0.493371	-1.0979
0000011_11.tif	predator	MT9455	tbh1	15.724	14.102	5.34395	2.80583	-2.53812	0	0.29777	0.835493	-0.755776
0000011_11.tif	predator	MT9455	tbh1	18.203	15.311	5.34395	5.43759	0.0936365	1	0.29777	1.61915	0.0278822
0000011_11.tif	predator	MT9455	tbh1	16.891	16.429	5.34395	5.37488	0.0309252	1	0.29777	1.60048	0.0092086
0000011_11.tif	predator	MT9455	tbh1	16.613	16.297	5.34395	5.11434	-0.229607	0	0.29777	1.5229	-0.0683702
0000011_11.tif	predator	MT9455	tbh1	16.828	17.29	5.34395	6.08243	0.738483	1	0.29777	1.81117	0.219898
0000011_11.tif	predator	MT9455	tbh1	16.745	17.457	5.34395	6.19182	0.847867	1	0.29777	1.84374	0.252469
0000011_11.tif	predator	MT9455	tbh1	13.946	21.286	5.34395	9.348	4.00405	1	0.29777	2.78355	1.19229
0000011_11.tif	predator	MT9455	tbh1	13.96	21.064	5.34395	9.12603	3.78208	1	0.29777	2.71746	1.12619
0000011_11.tif	predator	MT9455	tbh1	16.648	17.891	5.34395	6.54082	1.19687	1	0.29777	1.94766	0.356391
0000011_11.tif	predator	MT9455	tbh1	18.821	15.019	5.34395	5.77376	0.429805	1	0.29777	1.71925	0.127983
0000011_11.tif	predator	MT9455	tbh1	18.759	14.915	5.34395	5.66609	0.322139	1	0.29777	1.68719	0.0959233
0000011_11.tif	predator	MT9455	tbh1	19.009	14.345	5.34395	5.61326	0.26931	1	0.29777	1.67146	0.0801923
0000011_11.tif	predator	MT9455	tbh1	19.078	14.172	5.34395	5.60449	0.260544	1	0.29777	1.66885	0.0775821
0000011_11.tif	predator	MT9455	tbh1	20.627	11.734	5.34395	6.69211	1.34816	1	0.29777	1.99271	0.401441
0000011_11.tif	predator	MT9455	tbh1	16.634	11.262	5.34395	2.77946	-2.56449	0	0.29777	0.827639	-0.763629
0000011_11.tif	predator	MT9455	tbh1	16.988	10.964	5.34395	3.20175	-2.1422	0	0.29777	0.953384	-0.637884
0000011_11.tif	predator	MT9455	tbh1	17.203	10.998	5.34395	3.39762	-1.94633	0	0.29777	1.01171	-0.579559
0000011_11.tif	predator	MT9455	tbh1	17.141	9.165	5.34395	4.2366	-1.10736	0	0.29777	1.26153	-0.329737
0000011_11.tif	predator	MT9455	tbh1	16.717	9.429	5.34395	3.74405	-1.5999	0	0.29777	1.11487	-0.476402
0000011_11.tif	predator	MT9455	tbh1	16.627	9.561	5.34395	3.58899	-1.75496	0	0.29777	1.06869	-0.522575
0000011_11.tif	predator	MT9455	tbh1	16.46	9.359	5.34395	3.60718	-1.73677	0	0.29777	1.07411	-0.517159
0000011_11.tif	predator	MT9455	tbh1	16.536	9.304	5.34395	3.69967	-1.64428	0	0.29777	1.10165	-0.489617
0000011_11.tif	predator	MT9455	tbh1	16.446	9.498	5.34395	3.49909	-1.84486	0	0.29777	1.04193	-0.549343
0000011_11.tif	predator	MT9455	tbh1	16.446	9.679	5.34395	3.37537	-1.96858	0	0.29777	1.00508	-0.586183
0000011_11.tif	predator	MT9455	tbh1	19.349	10.2	5.34395	5.68327	0.33932	1	0.29777	1.69231	0.101039
0000011_11.tif	predator	MT9455	tbh1	19.467	10.193	5.34395	5.79783	0.453882	1	0.29777	1.72642	0.135153
0000011_11.tif	predator	MT9455	tbh1	19.849	10.102	5.34395	6.18957	0.845623	1	0.29777	1.84307	0.251801
0000011_11.tif	predator	MT9455	tbh1	19.877	9.908	5.34395	6.27635	0.932404	1	0.29777	1.86891	0.277642
0000011_11.tif	predator	MT9455	tbh1	19.898	9.755	5.34395	6.34721	1.00326	1	0.29777	1.89001	0.298741
0000011_11.tif	predator	MT9455	tbh1	19.946	9.644	5.34395	6.43106	1.08711	1	0.29777	1.91498	0.323708
0000011_11.tif	predator	MT9455	tbh1	19.363	8.797	5.34395	6.26869	0.924742	1	0.29777	1.86663	0.27536
0000011_11.tif	predator	MT9455	tbh1	19.175	8.589	5.34395	6.21627	0.872316	1	0.29777	1.85102	0.25975
0000011_11.tif	predator	MT9455	tbh1	18.898	8.394	5.34395	6.09603	0.752076	1	0.29777	1.81521	0.223946
00000012_5.tif	control	MT15434	tph1	14.016	15.083	4.91146	5.03276	0.1213	1	0.29777	1.49861	0.0361196
00000012_5.tif	control	MT15434	tph1	14.604	15.057	4.91146	4.69511	-0.216359	0	0.29777	1.39806	-0.0644251
00000012_5.tif	control	MT15434	tph1	14.776	15.099	4.91146	4.64983	-0.261632	0	0.29777	1.38458	-0.077906
00000012_5.tif	control	MT15434	tph1	14.802	15.005	4.91146	4.55449	-0.356976	0	0.29777	1.35619	-0.106297
00000012_5.tif	control	MT15434	tph1	15.333	15.302	4.91146	4.61048	-0.300986	0	0.29777	1.37286	-0.0896247
00000012_5.tif	control	MT15434	tph1	15.286	14.776	4.91146	4.13905	-0.772418	0	0.29777	1.23248	-0.230003
00000012_5.tif	control	MT15434	tph1	14.542	14.792	4.91146	4.49906	-0.412406	0	0.29777	1.33968	-0.122802
00000012_5.tif	control	MT15434	tph1	14.25	14.604	4.91146	4.50738	-0.404083	0	0.29777	1.34216	-0.120324
00000012_5.tif	control	MT15434	tph1	14.214	14.417	4.91146	4.38036	-0.531109	0	0.29777	1.30434	-0.158148
00000012_5.tif	control	MT15434	tph1	14.406	14.24	4.91146	4.12274	-0.788721	0	0.29777	1.22763	-0.234857
00000012_5.tif	control	MT15434	tph1	13.438	13.76	4.91146	4.46095	-0.450517	0	0.29777	1.32834	-0.13415
00000012_5.tif	control	MT15434	tph1	13.526	13.901	4.91146	4.48332	-0.428145	0	0.29777	1.335	-0.127489
00000012_5.tif	control	MT15434	tph1	13.422	13.526	4.91146	4.33159	-0.57987	0	0.29777	1.28982	-0.172668
00000012_5.tif	control	MT15434	tph1	13.875	14.042	4.91146	4.32398	-0.58748	0	0.29777	1.28755	-0.174934
00000012_5.tif	control	MT15434	tph1	14.354	13.641	4.91146	3.70237	-1.2091	0	0.29777	1.10245	-0.360033
00000012_5.tif	control	MT15434	tph1	14.526	13.323	4.91146	3.35539	-1.55608	0	0.29777	0.999133	-0.463353
00000012_5.tif	control	MT15434	tph1	14.901	13.318	4.91146	3.09496	-1.8165	0	0.29777	0.921586	-0.5409
00000012_5.tif	control	MT15434	tph1	14.823	13.161	4.91146	3.0313	-1.88017	0	0.29777	0.90263	-0.559857
00000012_5.tif	control	MT15434	tph1	15.422	13.979	4.91146	3.35857	-1.55289	0	0.29777	1.00008	-0.462404
00000012_5.tif	control	MT15434	tph1	15.51	14.385	4.91146	3.6917	-1.21976	0	0.29777	1.09928	-0.363208
00000012_5.tif	control	MT15434	tph1	15.891	15.13	4.91146	4.28197	-0.62949	0	0.29777	1.27504	-0.187443
00000012_5.tif	control	MT15434	tph1	15.979	15.167	4.91146	4.29773	-0.613732	0	0.29777	1.27974	-0.182751
00000012_5.tif	control	MT15434	tph1	16.396	15.156	4.91146	4.21495	-0.696514	0	0.29777	1.25509	-0.207401
00000012_5.tif	control	MT15434	tph1	16.37	14.219	4.91146	3.29161	-1.61985	0	0.29777	0.980144	-0.482342
00000012_5.tif	control	MT15434	tph1	16.349	14.115	4.91146	3.19284	-1.71863	0	0.29777	0.950731	-0.511755
00000012_5.tif	control	MT15434	tph1	16.078	13.911	4.91146	3.05586	-1.8556	0	0.29777	0.909945	-0.552542
00000012_5.tif	control	MT15434	tph1	15.854	13.922	4.91146	3.13549	-1.77597	0	0.29777	0.933656	-0.52883
00000012_5.tif	control	MT15434	tph1	14.635	12.745	4.91146	2.89254	-2.01892	0	0.29777	0.861313	-0.601174
00000012_5.tif	control	MT15434	tph1	13.911	12.635	4.91146	3.43876	-1.47271	0	0.29777	1.02396	-0.438528
00000012_5.tif	control	MT15434	tph1	14.198	12.474	4.91146	3.10969	-1.80177	0	0.29777	0.925973	-0.536514
00000012_5.tif	control	MT15434	tph1	13.578	12.781	4.91146	3.801	-1.11047	0	0.29777	1.13182	-0.330663
00000012_5.tif	control	MT15434	tph1	13.292	12.031	4.91146	3.78076	-1.1307	0	0.29777	1.1258	-0.33669
00000012_5.tif	control	MT15434	tph1	14.062	11.917	4.91146	3.01145	-1.90001	0	0.29777	0.89672	-0.565766
00000012_5.tif	control	MT15434	tph1	13.875	11.828	4.91146	3.16442	-1.74705	0	0.29777	0.942268	-0.520219
00000012_5.tif	control	MT15434	tph1	13.693	11.573	4.91146	3.28409	-1.62737	0	0.29777	0.977903	-0.484583
00000012_5.tif	control	MT15434	tph1	15.307	12.932	4.91146	2.53811	-2.37336	0	0.29777	0.755772	-0.706714
00000012_5.tif	control	MT15434	tph1	16.484	12.24	4.91146	1.33963	-3.57184	0	0.29777	0.398901	-1.06359
00000012_5.tif	control	MT15434	tph1	16.318	11.411	4.91146	0.74551	-4.16595	0	0.29777	0.22199	-1.2405
00000012_5.tif	control	MT15434	tph1	14.479	11.307	4.91146	2.46559	-2.44587	0	0.29777	0.734179	-0.728308
00000012_5.tif	control	MT15434	tph1	14.688	11.12	4.91146	2.23877	-2.6727	0	0.29777	0.666637	-0.795849
00000012_5.tif	control	MT15434	tph1	14.76	11.068	4.91146	2.16404	-2.74742	0	0.29777	0.644387	-0.8181
00000012_5.tif	control	MT15434	tph1	15.161	11.146	4.91146	1.76938	-3.14208	0	0.29777	0.526868	-0.935618
00000012_5.tif	control	MT15434	tph1	16.286	10.099	4.91146	1.08172	-3.82974	0	0.29777	0.322104	-1.14038
00000012_5.tif	control	MT15434	tph1	16.516	9.677	4.91146	1.35906	-3.5524	0	0.29777	0.404687	-1.0578
00000012_5.tif	control	MT15434	tph1	15.276	9.859	4.91146	1.9881	-2.92336	0	0.29777	0.591996	-0.87049
00000012_5.tif	control	MT15434	tph1	14.755	9.479	4.91146	2.63266	-2.2788	0	0.29777	0.783928	-0.678559
00000012_5.tif	control	MT15434	tph1	13.88	9.135	4.91146	3.55467	-1.35679	0	0.29777	1.05847	-0.404012
00000012_5.tif	control	MT15434	tph1	14.062	8.688	4.91146	3.66134	-1.25013	0	0.29777	1.09024	-0.37225
00000012_5.tif	control	MT15434	tph1	14.182	8.604	4.91146	3.62278	-1.28869	0	0.29777	1.07875	-0.383733
00000012_5.tif	control	MT15434	tph1	15.438	9.365	4.91146	2.18887	-2.7226	0	0.29777	0.651779	-0.810708
00000012_5.tif	control	MT15434	tph1	15.37	9.146	4.91146	2.39798	-2.51349	0	0.29777	0.714045	-0.748441
00000012_5.tif	control	MT15434	tph1	15.427	8.938	4.91146	2.52593	-2.38553	0	0.29777	0.752146	-0.710341
00000012_5.tif	control	MT15434	tph1	15.13	8.62	4.91146	2.95848	-1.95299	0	0.29777	0.880945	-0.581541
00000012_5.tif	control	MT15434	tph1	14.922	8.323	4.91146	3.32081	-1.59065	0	0.29777	0.988839	-0.473648
00000012_5.tif	control	MT15434	tph1	16.01	9.167	4.91146	2.0241	-2.88736	0	0.29777	0.602717	-0.859769
00000012_5.tif	control	MT15434	tph1	16.349	9.057	4.91146	2.0008	-2.91066	0	0.29777	0.59578	-0.866707
00000012_5.tif	control	MT15434	tph1	15.781	8.557	4.91146	2.67278	-2.23868	0	0.29777	0.795875	-0.666612
00000012_5.tif	control	MT15434	tph1	15.849	8.427	4.91146	2.76379	-2.14767	0	0.29777	0.822974	-0.639513
00000012_5.tif	control	MT15434	tph1	15.964	7.969	4.91146	3.15401	-1.75745	0	0.29777	0.93917	-0.523317
00000012_5.tif	control	MT15434	tph1	16.078	7.719	4.91146	3.36264	-1.54882	0	0.29777	1.00129	-0.461193
00000012_5.tif	control	MT15434	tph1	15.24	7.354	4.91146	3.99168	-0.919782	0	0.29777	1.1886	-0.273884
00000012_5.tif	control	MT15434	tph1	18.411	6.849	4.91146	4.38552	-0.525948	0	0.29777	1.30587	-0.156612
00000012_5.tif	control	MT15434	tph1	18.656	6.786	4.91146	4.53278	-0.378683	0	0.29777	1.34973	-0.112761
00000012_5.tif	control	MT15434	tph1	17.49	7.281	4.91146	3.73643	-1.17504	0	0.29777	1.1126	-0.349891
00000012_5.tif	control	MT15434	tph1	17.714	7.729	4.91146	3.34025	-1.57121	0	0.29777	0.994627	-0.46786
00000012_5.tif	control	MT15434	tph1	18.099	7.573	4.91146	3.59891	-1.31256	0	0.29777	1.07165	-0.39084
00000012_5.tif	control	MT15434	tph1	18.026	7.438	4.91146	3.70434	-1.20713	0	0.29777	1.10304	-0.359446
00000012_5.tif	control	MT15434	tph1	18.057	7.323	4.91146	3.82335	-1.08811	0	0.29777	1.13848	-0.324007
00000012_5.tif	control	MT15434	tph1	19.635	8.312	4.91146	3.80087	-1.11059	0	0.29777	1.13179	-0.330702
00000012_5.tif	control	MT15434	tph1	20.203	7.969	4.91146	4.44916	-0.462308	0	0.29777	1.32483	-0.137662
00000012_5.tif	control	MT15434	tph1	19.74	8.911	4.91146	3.49243	-1.41903	0	0.29777	1.03994	-0.422545
00000012_5.tif	control	MT15434	tph1	19.88	8.932	4.91146	3.59437	-1.31709	0	0.29777	1.0703	-0.39219
00000012_5.tif	control	MT15434	tph1	18.635	9.141	4.91146	2.50884	-2.40263	0	0.29777	0.747056	-0.715431
00000012_5.tif	control	MT15434	tph1	17.901	9.286	4.91146	1.95135	-2.96011	0	0.29777	0.581055	-0.881432
00000012_5.tif	control	MT15434	tph1	17.156	9.521	4.91146	1.47172	-3.43974	0	0.29777	0.438235	-1.02425
00000012_5.tif	control	MT15434	tph1	17.365	9.453	4.91146	1.5842	-3.32726	0	0.29777	0.471727	-0.990759
00000012_5.tif	control	MT15434	tph1	17.823	9.443	4.91146	1.77645	-3.13502	0	0.29777	0.528972	-0.933514
00000012_5.tif	control	MT15434	tph1	18.177	9.766	4.91146	1.74192	-3.16954	0	0.29777	0.518692	-0.943795
00000012_5.tif	control	MT15434	tph1	18.646	9.49	4.91146	2.27474	-2.63673	0	0.29777	0.677349	-0.785138
00000012_5.tif	control	MT15434	tph1	17.682	10.771	4.91146	0.786644	-4.12482	0	0.29777	0.234239	-1.22825
00000012_5.tif	control	MT15434	tph1	17.125	11.568	4.91146	0.62773	-4.28373	0	0.29777	0.186919	-1.27557
00000012_5.tif	control	MT15434	tph1	17.307	11.292	4.91146	0.499349	-4.41212	0	0.29777	0.148691	-1.3138
00000012_5.tif	control	MT15434	tph1	17.542	11.318	4.91146	0.709039	-4.20243	0	0.29777	0.21113	-1.25136
00000012_5.tif	control	MT15434	tph1	18.104	11.474	4.91146	1.2834	-3.62806	0	0.29777	0.382159	-1.08033
00000012_5.tif	control	MT15434	tph1	18.427	11.021	4.91146	1.50573	-3.40573	0	0.29777	0.448362	-1.01412
00000012_5.tif	control	MT15434	tph1	17.776	12.026	4.91146	1.355	-3.55647	0	0.29777	0.403478	-1.05901
00000012_5.tif	control	MT15434	tph1	18.562	12.021	4.91146	1.94572	-2.96575	0	0.29777	0.579376	-0.883111
00000012_5.tif	control	MT15434	tph1	18.958	11.839	4.91146	2.21213	-2.69933	0	0.29777	0.658706	-0.803781
00000012_5.tif	control	MT15434	tph1	19.094	11.818	4.91146	2.33022	-2.58125	0	0.29777	0.693869	-0.768617
00000012_5.tif	control	MT15434	tph1	18.984	11.583	4.91146	2.15005	-2.76141	0	0.29777	0.640221	-0.822266
00000012_5.tif	control	MT15434	tph1	19.109	11.547	4.91146	2.26082	-2.65065	0	0.29777	0.673204	-0.789283
00000012_5.tif	control	MT15434	tph1	19.203	9.901	4.91146	2.52077	-2.39069	0	0.29777	0.75061	-0.711876
00000012_5.tif	control	MT15434	tph1	19.432	10.938	4.91146	2.51026	-2.40121	0	0.29777	0.74748	-0.715007
00000012_5.tif	control	MT15434	tph1	20.146	10.599	4.91146	3.24574	-1.66573	0	0.29777	0.966483	-0.496004
00000012_5.tif	control	MT15434	tph1	19.875	9.932	4.91146	3.13145	-1.78001	0	0.29777	0.932452	-0.530035
00000012_5.tif	control	MT15434	tph1	20.552	9.943	4.91146	3.77357	-1.13789	0	0.29777	1.12366	-0.338829
00000012_5.tif	control	MT15434	tph1	20.417	11.802	4.91146	3.59174	-1.31972	0	0.29777	1.06951	-0.392974
00000012_5.tif	control	MT15434	tph1	20.521	11.766	4.91146	3.68511	-1.22635	0	0.29777	1.09732	-0.36517
00000012_5.tif	control	MT15434	tph1	21.078	9.438	4.91146	4.43076	-0.480704	0	0.29777	1.31935	-0.143139
00000012_5.tif	control	MT15434	tph1	20.948	8.917	4.91146	4.52105	-0.39041	0	0.29777	1.34623	-0.116253
00000012_5.tif	control	MT15434	tph1	18.974	12.656	4.91146	2.65327	-2.2582	0	0.29777	0.790063	-0.672423
00000012_5.tif	control	MT15434	tph1	17.49	13.344	4.91146	2.43711	-2.47435	0	0.29777	0.725699	-0.736787
00000012_5.tif	control	MT15434	tph1	17.443	13.396	4.91146	2.4774	-2.43406	0	0.29777	0.737696	-0.72479
00000012_5.tif	control	MT15434	tph1	17.552	13.828	4.91146	2.92271	-1.98876	0	0.29777	0.870294	-0.592192
00000012_5.tif	control	MT15434	tph1	16.734	14.932	4.91146	3.96246	-0.949002	0	0.29777	1.1799	-0.282584
00000012_5.tif	control	MT15434	tph1	16.797	14.833	4.91146	3.86102	-1.05044	0	0.29777	1.1497	-0.31279
00000012_5.tif	control	MT15434	tph1	16.844	14.911	4.91146	3.93777	-0.973691	0	0.29777	1.17255	-0.289936
00000012_5.tif	control	MT15434	tph1	17.13	14.427	4.91146	3.45926	-1.4522	0	0.29777	1.03006	-0.432423
00000012_5.tif	control	MT15434	tph1	17.443	14.797	4.91146	3.85834	-1.05313	0	0.29777	1.1489	-0.313589
00000012_5.tif	control	MT15434	tph1	18.578	14.156	4.91146	3.58712	-1.32434	0	0.29777	1.06814	-0.394349
00000012_5.tif	control	MT15434	tph1	18.672	14.104	4.91146	3.586	-1.32546	0	0.29777	1.0678	-0.394683
00000012_5.tif	control	MT15434	tph1	19.036	14.13	4.91146	3.7986	-1.11287	0	0.29777	1.13111	-0.331379
00000012_5.tif	control	MT15434	tph1	19.318	14.365	4.91146	4.15207	-0.759393	0	0.29777	1.23636	-0.226124
00000012_5.tif	control	MT15434	tph1	19.307	14.578	4.91146	4.32169	-0.58977	0	0.29777	1.28687	-0.175616
00000012_5.tif	control	MT15434	tph1	19.703	14.865	4.91146	4.78266	-0.128803	0	0.29777	1.42413	-0.0383538
00000012_5.tif	control	MT15434	tph1	20.026	15.188	4.91146	5.2338	0.322331	1	0.29777	1.55847	0.0959806
00000012_5.tif	control	MT15434	tph1	20	15.073	4.91146	5.126	0.214537	1	0.29777	1.52637	0.0638827
00000012_5.tif	control	MT15434	tph1	20.021	14.911	4.91146	5.01037	0.0989023	1	0.29777	1.49194	0.0294501
00000012_5.tif	control	MT15434	tph1	20.245	14.714	4.91146	5.00299	0.0915281	1	0.29777	1.48974	0.0272543
00000012_5.tif	control	MT15434	tph1	20.438	13.656	4.91146	4.42215	-0.489317	0	0.29777	1.31678	-0.145704
00000012_5.tif	control	MT15434	tph1	20.474	13.536	4.91146	4.37956	-0.531904	0	0.29777	1.3041	-0.158385
00000012_5.tif	control	MT15434	tph1	20.203	13.391	4.91146	4.07515	-0.836314	0	0.29777	1.21346	-0.249029
0000015_12.tif	predator	MT9455	tbh1	8.781	5.281	5.09904	8.99243	3.89339	1	0.29777	2.67768	1.15934
0000015_12.tif	predator	MT9455	tbh1	8.95	5.231	5.09904	8.92661	3.82757	1	0.29777	2.65808	1.13974
0000015_12.tif	predator	MT9455	tbh1	11.207	5.286	5.09904	7.6981	2.59906	1	0.29777	2.29226	0.773922
0000015_12.tif	predator	MT9455	tbh1	11.109	5.467	5.09904	7.5766	2.47756	1	0.29777	2.25608	0.737743
0000015_12.tif	predator	MT9455	tbh1	9.818	6.78	5.09904	7.176	2.07696	1	0.29777	2.1368	0.618458
0000015_12.tif	predator	MT9455	tbh1	5.363	10.467	5.09904	9.24766	4.14862	1	0.29777	2.75368	1.23534
0000015_12.tif	predator	MT9455	tbh1	5.87	10.432	5.09904	8.75832	3.65928	1	0.29777	2.60797	1.08962
0000015_12.tif	predator	MT9455	tbh1	6.502	9.988	5.09904	8.25347	3.15444	1	0.29777	2.45764	0.939297
0000015_12.tif	predator	MT9455	tbh1	7.175	9.481	5.09904	7.77664	2.6776	1	0.29777	2.31565	0.797308
0000015_12.tif	predator	MT9455	tbh1	6.752	13.224	5.09904	7.73829	2.63925	1	0.29777	2.30423	0.78589
0000015_12.tif	predator	MT9455	tbh1	7.995	13.085	5.09904	6.48764	1.3886	1	0.29777	1.93182	0.413484
0000015_12.tif	predator	MT9455	tbh1	6.398	17.043	5.09904	9.34181	4.24277	1	0.29777	2.78171	1.26337
0000015_12.tif	predator	MT9455	tbh1	6.53	17.37	5.09904	9.40162	4.30258	1	0.29777	2.79952	1.28118
0000015_12.tif	predator	MT9455	tbh1	6.696	17.571	5.09904	9.37458	4.27554	1	0.29777	2.79147	1.27313
0000015_12.tif	predator	MT9455	tbh1	6.87	17.592	5.09904	9.24358	4.14454	1	0.29777	2.75246	1.23412
0000015_12.tif	predator	MT9455	tbh1	6.793	17.877	5.09904	9.47236	4.37332	1	0.29777	2.82058	1.30224
0000015_12.tif	predator	MT9455	tbh1	7.345	19.575	5.09904	10.1735	5.0745	1	0.29777	3.02938	1.51104
0000015_12.tif	predator	MT9455	tbh1	9.054	20.304	5.09904	9.6629	4.56386	1	0.29777	2.87732	1.35898
0000015_12.tif	predator	MT9455	tbh1	12.575	21.609	5.09904	9.51595	4.41691	1	0.29777	2.83356	1.31522
0000015_12.tif	predator	MT9455	tbh1	12.422	21.554	5.09904	9.49323	4.39419	1	0.29777	2.8268	1.30846
0000015_12.tif	predator	MT9455	tbh1	12.47	20.366	5.09904	8.32451	3.22548	1	0.29777	2.47879	0.96045
0000015_12.tif	predator	MT9455	tbh1	12.408	19.193	5.09904	7.20704	2.108	1	0.29777	2.14604	0.627701
0000015_12.tif	predator	MT9455	tbh1	9.443	16.207	5.09904	6.3516	1.25257	1	0.29777	1.89132	0.372977
0000015_12.tif	predator	MT9455	tbh1	9.332	16.005	5.09904	6.31787	1.21883	1	0.29777	1.88127	0.362931
0000015_12.tif	predator	MT9455	tbh1	9.873	14.818	5.09904	5.21979	0.120756	1	0.29777	1.5543	0.0359574
0000015_12.tif	predator	MT9455	tbh1	9.887	14.672	5.09904	5.13788	0.038845	1	0.29777	1.52991	0.0115669
0000015_12.tif	predator	MT9455	tbh1	9.304	12.276	5.09904	5.128	0.028962	1	0.29777	1.52696	0.00862403
0000015_12.tif	predator	MT9455	tbh1	9.498	12.498	5.09904	4.93899	-0.160046	0	0.29777	1.47068	-0.0476569
0000015_12.tif	predator	MT9455	tbh1	10.345	10.964	5.09904	4.29243	-0.806613	0	0.29777	1.27816	-0.240185
0000015_12.tif	predator	MT9455	tbh1	10.179	10.283	5.09904	4.69681	-0.402224	0	0.29777	1.39857	-0.11977
0000015_12.tif	predator	MT9455	tbh1	10.13	10.089	5.09904	4.82599	-0.273049	0	0.29777	1.43703	-0.0813057
0000015_12.tif	predator	MT9455	tbh1	14.714	2.38	5.09904	9.90002	4.80098	1	0.29777	2.94793	1.42959
0000015_12.tif	predator	MT9455	tbh1	15.396	2.469	5.09904	9.85427	4.75523	1	0.29777	2.9343	1.41596
0000015_12.tif	predator	MT9455	tbh1	15.474	2.411	5.09904	9.91988	4.82084	1	0.29777	2.95384	1.4355
0000015_12.tif	predator	MT9455	tbh1	15.495	2.797	5.09904	9.53842	4.43938	1	0.29777	2.84025	1.32191
0000015_12.tif	predator	MT9455	tbh1	15.49	3.042	5.09904	9.29441	4.19538	1	0.29777	2.7676	1.24926
0000015_12.tif	predator	MT9455	tbh1	12.677	3.958	5.09904	8.50113	3.40209	1	0.29777	2.53138	1.01304
0000015_12.tif	predator	MT9455	tbh1	12.906	4	5.09904	8.41551	3.31647	1	0.29777	2.50589	0.987547
0000015_12.tif	predator	MT9455	tbh1	14.031	4.875	5.09904	7.41186	2.31282	1	0.29777	2.20703	0.688688
0000015_12.tif	predator	MT9455	tbh1	14.318	18.396	5.09904	6.12106	1.02202	1	0.29777	1.82267	0.304328
0000015_12.tif	predator	MT9455	tbh1	15.219	17.922	5.09904	5.70059	0.601548	1	0.29777	1.69746	0.179123
0000015_12.tif	predator	MT9455	tbh1	15.281	17.828	5.09904	5.61654	0.517501	1	0.29777	1.67244	0.154096
0000015_12.tif	predator	MT9455	tbh1	16.526	19.229	5.09904	7.26148	2.16244	1	0.29777	2.16225	0.643909
0000015_12.tif	predator	MT9455	tbh1	16.818	20.104	5.09904	8.18356	3.08452	1	0.29777	2.43682	0.918477
0000015_12.tif	predator	MT9455	tbh1	15.667	21.776	5.09904	9.57994	4.4809	1	0.29777	2.85262	1.33428
0000015_12.tif	predator	MT9455	tbh1	15.745	21.521	5.09904	9.33777	4.23873	1	0.29777	2.78051	1.26217
0000015_12.tif	predator	MT9455	tbh1	14.005	21.333	5.09904	9.06706	3.96802	1	0.29777	2.6999	1.18156
0000015_12.tif	predator	MT9455	tbh1	17.443	21.432	5.09904	9.63838	4.53935	1	0.29777	2.87002	1.35168
0000015_12.tif	predator	MT9455	tbh1	17.734	20.099	5.09904	8.49132	3.39228	1	0.29777	2.52846	1.01012
0000015_12.tif	predator	MT9455	tbh1	18.76	20.182	5.09904	9.01312	3.91409	1	0.29777	2.68384	1.1655
0000015_12.tif	predator	MT9455	tbh1	18.865	20.109	5.09904	9.00041	3.90137	1	0.29777	2.68005	1.16171
0000015_12.tif	predator	MT9455	tbh1	18.964	20.031	5.09904	8.98215	3.88311	1	0.29777	2.67462	1.15627
0000015_12.tif	predator	MT9455	tbh1	18.828	19.906	5.09904	8.80578	3.70674	1	0.29777	2.6221	1.10376
0000015_12.tif	predator	MT9455	tbh1	19.016	19.599	5.09904	8.63941	3.54037	1	0.29777	2.57256	1.05422
0000015_12.tif	predator	MT9455	tbh1	19.677	20.245	5.09904	9.54018	4.44114	1	0.29777	2.84078	1.32244
0000015_12.tif	predator	MT9455	tbh1	18.734	19.26	5.09904	8.20265	3.10361	1	0.29777	2.4425	0.924162
0000015_12.tif	predator	MT9455	tbh1	19.62	6.49	5.09904	7.7713	2.67226	1	0.29777	2.31406	0.79572
0000015_12.tif	predator	MT9455	tbh1	19.646	6.37	5.09904	7.87824	2.7792	1	0.29777	2.3459	0.827562
0000015_12.tif	predator	MT9455	tbh1	17.318	2.432	5.09904	10.2583	5.15929	1	0.29777	3.05462	1.53628
0000015_12.tif	predator	MT9455	tbh1	17.891	2.578	5.09904	10.2964	5.19736	1	0.29777	3.06596	1.54762
0000015_12.tif	predator	MT9455	tbh1	18.292	2.594	5.09904	10.4231	5.32405	1	0.29777	3.10368	1.58534
0000015_12.tif	predator	MT9455	tbh1	17.792	3.224	5.09904	9.65548	4.55644	1	0.29777	2.87511	1.35677
0000015_12.tif	predator	MT9455	tbh1	18.714	3.062	5.09904	10.1604	5.06134	1	0.29777	3.02546	1.50712
0000015_12.tif	predator	MT9455	tbh1	19.896	3.271	5.09904	10.5331	5.43402	1	0.29777	3.13643	1.61809
0000015_12.tif	predator	MT9455	tbh1	19.734	3.021	5.09904	10.6661	5.56709	1	0.29777	3.17605	1.65771
0000015_12.tif	predator	MT9455	tbh1	20.016	3.036	5.09904	10.7962	5.6972	1	0.29777	3.21479	1.69645
0000015_12.tif	predator	MT9455	tbh1	21.615	4.708	5.09904	10.4341	5.33505	1	0.29777	3.10696	1.58862
0000015_12.tif	predator	MT9455	tbh1	21.188	5.495	5.09904	9.57212	4.47308	1	0.29777	2.85029	1.33195
0000015_12.tif	predator	MT9455	tbh1	21.547	6.87	5.09904	8.93577	3.83674	1	0.29777	2.66081	1.14246
0000015_12.tif	predator	MT9455	tbh1	22.073	6.818	5.09904	9.39014	4.2911	1	0.29777	2.7961	1.27776
0000015_12.tif	predator	MT9455	tbh1	22.021	6.708	5.09904	9.41252	4.31348	1	0.29777	2.80277	1.28443
0000015_12.tif	predator	MT9455	tbh1	22.167	6.708	5.09904	9.53063	4.43159	1	0.29777	2.83793	1.31959
0000015_12.tif	predator	MT9455	tbh1	22.453	6.599	5.09904	9.82674	4.7277	1	0.29777	2.92611	1.40777
0000015_12.tif	predator	MT9455	tbh1	22.406	6.802	5.09904	9.67209	4.57305	1	0.29777	2.88006	1.36172
0000015_12.tif	predator	MT9455	tbh1	22.547	6.812	5.09904	9.78307	4.68404	1	0.29777	2.91311	1.39477
0000015_12.tif	predator	MT9455	tbh1	22.667	6.969	5.09904	9.79691	4.69787	1	0.29777	2.91723	1.39889
0000015_12.tif	predator	MT9455	tbh1	22.766	8.094	5.09904	9.32441	4.22538	1	0.29777	2.77653	1.25819
0000015_12.tif	predator	MT9455	tbh1	21.844	8.51	5.09904	8.31387	3.21484	1	0.29777	2.47562	0.957282
0000015_12.tif	predator	MT9455	tbh1	23.042	9.312	5.09904	9.1059	4.00686	1	0.29777	2.71146	1.19312
0000015_12.tif	predator	MT9455	tbh1	20.656	9.906	5.09904	6.65996	1.56092	1	0.29777	1.98314	0.464796
0000015_12.tif	predator	MT9455	tbh1	21.312	10.375	5.09904	7.1378	2.03876	1	0.29777	2.12542	0.607082
0000015_12.tif	predator	MT9455	tbh1	20.359	13.021	5.09904	5.97364	0.8746	1	0.29777	1.77877	0.26043
0000015_12.tif	predator	MT9455	tbh1	20.38	14.276	5.09904	6.27525	1.17621	1	0.29777	1.86858	0.350239
0000015_12.tif	predator	MT9455	tbh1	22.703	14.474	5.09904	8.55807	3.45904	1	0.29777	2.54834	1.03
0000015_12.tif	predator	MT9455	tbh1	22.865	14.38	5.09904	8.69151	3.59247	1	0.29777	2.58807	1.06973
0000016_13.tif	control	N2	wt	11.094	16.745	5.052	5.94812	0.896116	1	0.29777	1.77117	0.266836
0000016_13.tif	control	N2	wt	11.167	16.599	5.052	5.78657	0.734566	1	0.29777	1.72307	0.218732
0000016_13.tif	control	N2	wt	13.312	15.807	5.052	4.12166	-0.93034	0	0.29777	1.22731	-0.277027
0000016_13.tif	control	N2	wt	13.151	15.656	5.052	4.02726	-1.02475	0	0.29777	1.1992	-0.305139
0000016_13.tif	control	N2	wt	13.432	15.656	5.052	3.94353	-1.10847	0	0.29777	1.17426	-0.33007
0000016_13.tif	control	N2	wt	12.964	15.656	5.052	4.09273	-0.959273	0	0.29777	1.21869	-0.285643
0000016_13.tif	control	N2	wt	13.099	15.495	5.052	3.89375	-1.15825	0	0.29777	1.15944	-0.344893
0000016_13.tif	control	N2	wt	13.766	15.51	5.052	3.72488	-1.32713	0	0.29777	1.10916	-0.395178
0000016_13.tif	control	N2	wt	13.865	15.464	5.052	3.66184	-1.39016	0	0.29777	1.09039	-0.413948
0000016_13.tif	control	N2	wt	12.964	15.271	5.052	3.7378	-1.31421	0	0.29777	1.113	-0.391331
0000016_13.tif	control	N2	wt	12.703	15.432	5.052	3.99453	-1.05747	0	0.29777	1.18945	-0.314884
0000016_13.tif	control	N2	wt	12.604	15.339	5.052	3.95738	-1.09462	0	0.29777	1.17839	-0.325946
0000016_13.tif	control	N2	wt	12.083	15.297	5.052	4.19465	-0.857355	0	0.29777	1.24904	-0.255295
0000016_13.tif	control	N2	wt	12.646	14.953	5.052	3.60051	-1.45149	0	0.29777	1.07212	-0.43221
0000016_13.tif	control	N2	wt	12.682	14.896	5.052	3.53313	-1.51888	0	0.29777	1.05206	-0.452276
0000016_13.tif	control	N2	wt	10.724	14.406	5.052	4.54012	-0.511878	0	0.29777	1.35191	-0.152422
0000016_13.tif	control	N2	wt	10.875	14.344	5.052	4.38052	-0.671486	0	0.29777	1.30439	-0.199949
0000016_13.tif	control	N2	wt	9.724	13.068	5.052	4.90753	-0.144475	0	0.29777	1.46131	-0.0430203
0000016_13.tif	control	N2	wt	11.995	14.37	5.052	3.53561	-1.5164	0	0.29777	1.0528	-0.451537
0000016_13.tif	control	N2	wt	12.104	14.177	5.052	3.32219	-1.72981	0	0.29777	0.989249	-0.515086
0000016_13.tif	control	N2	wt	12.172	14.302	5.052	3.36377	-1.68823	0	0.29777	1.00163	-0.502705
0000016_13.tif	control	N2	wt	12.208	13.974	5.052	3.10674	-1.94526	0	0.29777	0.925094	-0.57924
0000016_13.tif	control	N2	wt	12.443	13.438	5.052	2.5796	-2.4724	0	0.29777	0.768128	-0.736206
0000016_13.tif	control	N2	wt	12.359	13.354	5.052	2.597	-2.455	0	0.29777	0.773308	-0.731026
0000016_13.tif	control	N2	wt	12.224	13.328	5.052	2.69401	-2.35799	0	0.29777	0.802196	-0.702139
0000016_13.tif	control	N2	wt	12.344	13.161	5.052	2.50329	-2.54871	0	0.29777	0.745405	-0.758929
0000016_13.tif	control	N2	wt	13.266	12.365	5.052	1.31624	-3.73576	0	0.29777	0.391937	-1.1124
0000016_13.tif	control	N2	wt	13.161	12.354	5.052	1.40965	-3.64235	0	0.29777	0.419753	-1.08458
0000016_13.tif	control	N2	wt	12.833	11.922	5.052	1.6474	-3.4046	0	0.29777	0.490547	-1.01379
0000016_13.tif	control	N2	wt	12.839	11.693	5.052	1.64788	-3.40412	0	0.29777	0.49069	-1.01364
[truncated: 20,069 more rows]
