# Supplementary material for: Dopamine signaling regulates predator-driven changes in Caenorhabditis elegans’ egg laying behavior
Source: eLife. 2023 Jul 11;12:e83957. doi: 10.7554/eLife.83957 (PMC10335835; doi:10.7554/eLife.83957)
Supplement: Figure 6—source data 2. — For each test arena, data tabulate the arena, predator exposure condition, genotype, <x,y> coordinates in pixels, lawn radius in pixels, the egg distance from arena center in pixels, the egg distance from lawn edge in pixels, position as 1 (off) or 0 (on) lawn, the conversion factor for pixel data in mm-per-pixel, the calculated distance from center in mm, the calculated distance from the lawn edge in mm. [file elife-83957-fig6-data2.xlsx]

## Sheet: Figure6D-F
Arena	Condition	Strain	Genotype	X	Y	LawnRadius	DistCenterPx	DistEdgePx	off	PxScale	DistCenterMm	DistEdgeMm
00000002_4.tif	predator	CB1112	cat2(e1112)	8.281	15.208	5.25	6.82027	1.57028	1	0.29777	2.03087	0.467581
00000002_4.tif	predator	CB1112	cat2(e1112)	9.026	9.859	5.25	5.04672	-0.203273	0	0.29777	1.50276	-0.0605286
00000002_4.tif	predator	CB1112	cat2(e1112)	10.161	10.203	5.25	3.86077	-1.38923	0	0.29777	1.14962	-0.41367
00000002_4.tif	predator	CB1112	cat2(e1112)	10.714	11.682	5.25	3.17504	-2.07495	0	0.29777	0.945433	-0.617858
00000002_4.tif	predator	CB1112	cat2(e1112)	11.406	8.396	5.25	3.79914	-1.45085	0	0.29777	1.13127	-0.43202
00000002_4.tif	predator	CB1112	cat2(e1112)	12.036	12.13	5.25	2.01184	-3.23816	0	0.29777	0.599064	-0.964227
00000002_4.tif	predator	CB1112	cat2(e1112)	11.995	14.276	5.25	3.52153	-1.72847	0	0.29777	1.04861	-0.514686
00000002_4.tif	predator	CB1112	cat2(e1112)	12.682	15.839	5.25	4.69837	-0.551624	0	0.29777	1.39903	-0.164257
00000002_4.tif	predator	CB1112	cat2(e1112)	13.495	11.302	5.25	0.370135	-4.87986	0	0.29777	0.110215	-1.45308
00000002_4.tif	predator	CB1112	cat2(e1112)	13.312	9.052	5.25	2.30725	-2.94274	0	0.29777	0.68703	-0.876261
00000002_4.tif	predator	CB1112	cat2(e1112)	13.396	8.875	5.25	2.46208	-2.78791	0	0.29777	0.733134	-0.830157
00000002_4.tif	predator	CB1112	cat2(e1112)	13.792	8.38	5.25	2.91291	-2.33708	0	0.29777	0.867379	-0.695913
00000002_4.tif	predator	CB1112	cat2(e1112)	12.641	7.958	5.25	3.55158	-1.69841	0	0.29777	1.05755	-0.505737
00000002_4.tif	predator	CB1112	cat2(e1112)	12.969	7.594	5.25	3.805	-1.445	0	0.29777	1.13301	-0.430277
00000002_4.tif	predator	CB1112	cat2(e1112)	12.75	7.161	5.25	4.27883	-0.971166	0	0.29777	1.27411	-0.289184
00000002_4.tif	predator	CB1112	cat2(e1112)	13.385	7.151	5.25	4.16873	-1.08127	0	0.29777	1.24132	-0.321969
00000002_4.tif	predator	CB1112	cat2(e1112)	14.391	6.547	5.25	4.77407	-0.47593	0	0.29777	1.42157	-0.141718
00000002_4.tif	predator	CB1112	cat2(e1112)	14.286	6.859	5.25	4.45295	-0.797049	0	0.29777	1.32595	-0.237337
00000002_4.tif	predator	CB1112	cat2(e1112)	14.354	7.516	5.25	3.80753	-1.44246	0	0.29777	1.13377	-0.429522
00000002_4.tif	predator	CB1112	cat2(e1112)	14.318	7.797	5.25	3.52424	-1.72576	0	0.29777	1.04941	-0.51388
00000002_4.tif	predator	CB1112	cat2(e1112)	14.823	8.646	5.25	2.81409	-2.43591	0	0.29777	0.83795	-0.725341
00000002_4.tif	predator	CB1112	cat2(e1112)	14.802	8.75	5.25	2.70919	-2.5408	0	0.29777	0.806717	-0.756574
00000002_4.tif	predator	CB1112	cat2(e1112)	15.578	8.849	5.25	2.98373	-2.26627	0	0.29777	0.888464	-0.674827
00000002_4.tif	predator	CB1112	cat2(e1112)	15.271	9.922	5.25	1.96309	-3.2869	0	0.29777	0.58455	-0.978741
00000002_4.tif	predator	CB1112	cat2(e1112)	14.495	10.396	5.25	1.09532	-4.15468	0	0.29777	0.326152	-1.23714
00000002_4.tif	predator	CB1112	cat2(e1112)	13.875	10.974	5.25	0.318157	-4.93184	0	0.29777	0.0947377	-1.46855
00000002_4.tif	predator	CB1112	cat2(e1112)	15.083	14.964	5.25	3.86873	-1.38126	0	0.29777	1.15199	-0.411298
00000002_4.tif	predator	CB1112	cat2(e1112)	18.698	13.635	5.25	5.37099	0.120995	1	0.29777	1.59932	0.0360286
00000002_4.tif	predator	CB1112	cat2(e1112)	16.135	12.323	5.25	2.49316	-2.75683	0	0.29777	0.742389	-0.820902
00000002_4.tif	predator	CB1112	cat2(e1112)	16.125	12.172	5.25	2.42528	-2.82471	0	0.29777	0.722177	-0.841115
00000002_4.tif	predator	CB1112	cat2(e1112)	17.167	12.802	5.25	3.63088	-1.61911	0	0.29777	1.08117	-0.482123
00000002_4.tif	predator	CB1112	cat2(e1112)	17.729	12.156	5.25	3.95942	-1.29058	0	0.29777	1.179	-0.384295
00000002_8.tif	control	MT15620	cat2(n4547)	10.609	14.682	4.86458	4.05584	-0.808737	0	0.29777	1.20771	-0.240818
00000002_8.tif	control	MT15620	cat2(n4547)	10.724	14.661	4.86458	3.95531	-0.90927	0	0.29777	1.17777	-0.270753
00000002_8.tif	control	MT15620	cat2(n4547)	11.135	14.776	4.86458	3.74066	-1.12391	0	0.29777	1.11386	-0.334668
00000002_8.tif	control	MT15620	cat2(n4547)	11.193	14.672	4.86458	3.62518	-1.2394	0	0.29777	1.07947	-0.369056
00000002_8.tif	control	MT15620	cat2(n4547)	11.792	15.542	4.86458	3.98055	-0.884023	0	0.29777	1.18529	-0.263235
00000002_8.tif	control	MT15620	cat2(n4547)	11.844	15.672	4.86458	4.07152	-0.793062	0	0.29777	1.21238	-0.23615
00000002_8.tif	control	MT15620	cat2(n4547)	12.286	16.125	4.86458	4.317	-0.547577	0	0.29777	1.28547	-0.163052
00000002_8.tif	control	MT15620	cat2(n4547)	12.26	15.682	4.86458	3.91009	-0.95449	0	0.29777	1.16431	-0.284218
00000002_8.tif	control	MT15620	cat2(n4547)	12.885	15.755	4.86458	3.79884	-1.06574	0	0.29777	1.13118	-0.317345
00000002_8.tif	control	MT15620	cat2(n4547)	12.26	15.24	4.86458	3.50234	-1.36224	0	0.29777	1.04289	-0.405633
00000002_8.tif	control	MT15620	cat2(n4547)	12.823	15.042	4.86458	3.12221	-1.74236	0	0.29777	0.929702	-0.518823
00000002_8.tif	control	MT15620	cat2(n4547)	13.448	15.875	4.86458	3.84051	-1.02407	0	0.29777	1.14359	-0.304938
00000002_8.tif	control	MT15620	cat2(n4547)	13.385	15.792	4.86458	3.76222	-1.10236	0	0.29777	1.12028	-0.328249
00000002_8.tif	control	MT15620	cat2(n4547)	13.62	15.698	4.86458	3.65663	-1.20794	0	0.29777	1.08884	-0.35969
00000002_8.tif	control	MT15620	cat2(n4547)	13.833	15.568	4.86458	3.52898	-1.3356	0	0.29777	1.05082	-0.397701
00000002_8.tif	control	MT15620	cat2(n4547)	14.281	16.266	4.86458	4.26542	-0.599155	0	0.29777	1.27011	-0.17841
00000002_8.tif	control	MT15620	cat2(n4547)	14.453	16.255	4.86458	4.28189	-0.582686	0	0.29777	1.27502	-0.173506
00000002_8.tif	control	MT15620	cat2(n4547)	14.578	16.057	4.86458	4.11246	-0.752118	0	0.29777	1.22457	-0.223958
00000002_8.tif	control	MT15620	cat2(n4547)	10.604	14.182	4.86458	3.75375	-1.11082	0	0.29777	1.11775	-0.33077
00000002_8.tif	control	MT15620	cat2(n4547)	10.927	13.958	4.86458	3.36068	-1.5039	0	0.29777	1.00071	-0.447815
00000002_8.tif	control	MT15620	cat2(n4547)	11.031	13.865	4.86458	3.22226	-1.64231	0	0.29777	0.959493	-0.489032
00000002_8.tif	control	MT15620	cat2(n4547)	10.505	13.693	4.86458	3.58571	-1.27887	0	0.29777	1.06772	-0.380809
00000002_8.tif	control	MT15620	cat2(n4547)	10.078	13.354	4.86458	3.84102	-1.02356	0	0.29777	1.14374	-0.304784
00000002_8.tif	control	MT15620	cat2(n4547)	10.479	13.198	4.86458	3.41087	-1.45371	0	0.29777	1.01565	-0.432871
00000002_8.tif	control	MT15620	cat2(n4547)	10.5	13.125	4.86458	3.36693	-1.49764	0	0.29777	1.00257	-0.445954
00000002_8.tif	control	MT15620	cat2(n4547)	10.198	12.526	4.86458	3.5234	-1.34118	0	0.29777	1.04916	-0.399362
00000002_8.tif	control	MT15620	cat2(n4547)	10.307	12.359	4.86458	3.39583	-1.46875	0	0.29777	1.01118	-0.437349
00000002_8.tif	control	MT15620	cat2(n4547)	11.036	12.464	4.86458	2.68537	-2.17921	0	0.29777	0.799621	-0.648904
00000002_8.tif	control	MT15620	cat2(n4547)	11.224	12.229	4.86458	2.47109	-2.39349	0	0.29777	0.735815	-0.71271
00000002_8.tif	control	MT15620	cat2(n4547)	11.099	13.359	4.86458	2.90472	-1.95986	0	0.29777	0.864939	-0.583586
00000002_8.tif	control	MT15620	cat2(n4547)	11.312	13.469	4.86458	2.77159	-2.09299	0	0.29777	0.825296	-0.623229
00000002_8.tif	control	MT15620	cat2(n4547)	11.995	13.531	4.86458	2.25463	-2.60994	0	0.29777	0.671362	-0.777163
00000002_8.tif	control	MT15620	cat2(n4547)	12.047	13.276	4.86458	2.0532	-2.81138	0	0.29777	0.611382	-0.837143
00000002_8.tif	control	MT15620	cat2(n4547)	12	12.839	4.86458	1.8667	-2.99788	0	0.29777	0.555846	-0.892679
00000002_8.tif	control	MT15620	cat2(n4547)	12.495	14.031	4.86458	2.31935	-2.54523	0	0.29777	0.690632	-0.757893
00000002_8.tif	control	MT15620	cat2(n4547)	12.255	14.302	4.86458	2.67602	-2.18856	0	0.29777	0.796839	-0.651686
00000002_8.tif	control	MT15620	cat2(n4547)	13.177	14.573	4.86458	2.58207	-2.28251	0	0.29777	0.768863	-0.679662
00000002_8.tif	control	MT15620	cat2(n4547)	13.312	14.792	4.86458	2.77559	-2.08899	0	0.29777	0.826486	-0.622039
00000002_8.tif	control	MT15620	cat2(n4547)	13.792	15.146	4.86458	3.10574	-1.75884	0	0.29777	0.924797	-0.523728
00000002_8.tif	control	MT15620	cat2(n4547)	14.073	14.995	4.86458	2.97799	-1.88659	0	0.29777	0.886757	-0.561769
00000002_8.tif	control	MT15620	cat2(n4547)	13.682	14.771	4.86458	2.72901	-2.13557	0	0.29777	0.812616	-0.635909
00000002_8.tif	control	MT15620	cat2(n4547)	14	14.359	4.86458	2.33791	-2.52667	0	0.29777	0.69616	-0.752365
00000002_8.tif	control	MT15620	cat2(n4547)	14.411	14.568	4.86458	2.62743	-2.23714	0	0.29777	0.782371	-0.666154
00000002_8.tif	control	MT15620	cat2(n4547)	11.542	12.005	4.86458	2.14632	-2.71826	0	0.29777	0.639109	-0.809416
00000002_8.tif	control	MT15620	cat2(n4547)	11.615	11.969	4.86458	2.07428	-2.79029	0	0.29777	0.61766	-0.830865
00000002_8.tif	control	MT15620	cat2(n4547)	12.245	12.349	4.86458	1.4753	-3.38928	0	0.29777	0.439299	-1.00923
00000002_8.tif	control	MT15620	cat2(n4547)	14.036	13.75	4.86458	1.74309	-3.12149	0	0.29777	0.51904	-0.929485
00000002_8.tif	control	MT15620	cat2(n4547)	14.042	13.661	4.86458	1.65725	-3.20733	0	0.29777	0.493479	-0.955046
00000002_8.tif	control	MT15620	cat2(n4547)	14.12	13.656	4.86458	1.67081	-3.19376	0	0.29777	0.497518	-0.951007
00000002_8.tif	control	MT15620	cat2(n4547)	14.516	13.901	4.86458	2.03506	-2.82952	0	0.29777	0.60598	-0.842546
00000002_8.tif	control	MT15620	cat2(n4547)	14.536	13.979	4.86458	2.11449	-2.75009	0	0.29777	0.629632	-0.818893
00000002_8.tif	control	MT15620	cat2(n4547)	14.724	13.458	4.86458	1.75452	-3.11005	0	0.29777	0.522444	-0.926081
00000002_8.tif	control	MT15620	cat2(n4547)	14.141	12.719	4.86458	0.814578	-4.05	0	0.29777	0.242557	-1.20597
00000002_8.tif	control	MT15620	cat2(n4547)	14.12	12.589	4.86458	0.697017	-4.16756	0	0.29777	0.207551	-1.24097
00000002_8.tif	control	MT15620	cat2(n4547)	14.333	12.474	4.86458	0.776305	-4.08827	0	0.29777	0.23116	-1.21736
00000002_8.tif	control	MT15620	cat2(n4547)	14.411	12.396	4.86458	0.805012	-4.05956	0	0.29777	0.239709	-1.20882
00000002_8.tif	control	MT15620	cat2(n4547)	14.625	12.562	4.86458	1.07162	-3.79296	0	0.29777	0.319096	-1.12943
00000002_8.tif	control	MT15620	cat2(n4547)	13.062	12.031	4.86458	0.626097	-4.23848	0	0.29777	0.186433	-1.26209
00000002_8.tif	control	MT15620	cat2(n4547)	13.271	11.88	4.86458	0.447362	-4.41721	0	0.29777	0.133211	-1.31531
00000002_8.tif	control	MT15620	cat2(n4547)	13.427	11.698	4.86458	0.431807	-4.43277	0	0.29777	0.128579	-1.31995
00000002_8.tif	control	MT15620	cat2(n4547)	13.589	11.729	4.86458	0.328283	-4.53629	0	0.29777	0.097753	-1.35077
00000002_8.tif	control	MT15620	cat2(n4547)	13.922	11.474	4.86458	0.614313	-4.25026	0	0.29777	0.182924	-1.2656
00000002_8.tif	control	MT15620	cat2(n4547)	13.823	11.203	4.86458	0.849792	-4.01479	0	0.29777	0.253042	-1.19548
00000002_8.tif	control	MT15620	cat2(n4547)	12.229	11.536	4.86458	1.54425	-3.32032	0	0.29777	0.459832	-0.988693
00000002_8.tif	control	MT15620	cat2(n4547)	12.281	11.292	4.86458	1.59441	-3.27017	0	0.29777	0.474768	-0.973757
00000002_8.tif	control	MT15620	cat2(n4547)	12.526	11.031	4.86458	1.54025	-3.32433	0	0.29777	0.45864	-0.989885
00000002_8.tif	control	MT15620	cat2(n4547)	11.875	11.458	4.86458	1.90474	-2.95984	0	0.29777	0.567174	-0.881351
00000002_8.tif	control	MT15620	cat2(n4547)	11.198	11.443	4.86458	2.56104	-2.30354	0	0.29777	0.762599	-0.685926
00000002_8.tif	control	MT15620	cat2(n4547)	11.417	11.125	4.86458	2.44915	-2.41543	0	0.29777	0.729283	-0.719242
00000002_8.tif	control	MT15620	cat2(n4547)	11.286	11.094	4.86458	2.58231	-2.28227	0	0.29777	0.768933	-0.679592
00000002_8.tif	control	MT15620	cat2(n4547)	11.438	10.99	4.86458	2.48379	-2.38079	0	0.29777	0.739598	-0.708928
00000002_8.tif	control	MT15620	cat2(n4547)	10.901	11.016	4.86458	2.96986	-1.89472	0	0.29777	0.884334	-0.564191
00000002_8.tif	control	MT15620	cat2(n4547)	10.38	11.104	4.86458	3.43842	-1.42616	0	0.29777	1.02386	-0.424668
00000002_8.tif	control	MT15620	cat2(n4547)	10.432	10.969	4.86458	3.42825	-1.43633	0	0.29777	1.02083	-0.427697
00000002_8.tif	control	MT15620	cat2(n4547)	10.115	9.771	4.86458	4.23365	-0.63093	0	0.29777	1.26065	-0.187872
00000002_8.tif	control	MT15620	cat2(n4547)	10.734	9.604	4.86458	3.83014	-1.03444	0	0.29777	1.1405	-0.308025
00000002_8.tif	control	MT15620	cat2(n4547)	11.104	9.547	4.86458	3.59195	-1.27263	0	0.29777	1.06957	-0.378951
00000002_8.tif	control	MT15620	cat2(n4547)	11.385	9.521	4.86458	3.41456	-1.45001	0	0.29777	1.01675	-0.43177
00000002_8.tif	control	MT15620	cat2(n4547)	11.323	10.37	4.86458	2.89634	-1.96823	0	0.29777	0.862444	-0.586081
00000002_8.tif	control	MT15620	cat2(n4547)	11.823	9.078	4.86458	3.50193	-1.36265	0	0.29777	1.04277	-0.405755
00000002_8.tif	control	MT15620	cat2(n4547)	11.849	9.844	4.86458	2.86586	-1.99872	0	0.29777	0.853366	-0.59516
00000002_8.tif	control	MT15620	cat2(n4547)	12.203	9.578	4.86458	2.87689	-1.98768	0	0.29777	0.856653	-0.591872
00000002_8.tif	control	MT15620	cat2(n4547)	12.286	9.927	4.86458	2.53748	-2.32709	0	0.29777	0.755587	-0.692938
00000002_8.tif	control	MT15620	cat2(n4547)	12.672	10.083	4.86458	2.20679	-2.65778	0	0.29777	0.657117	-0.791408
00000002_8.tif	control	MT15620	cat2(n4547)	12.755	10.297	4.86458	1.97877	-2.88581	0	0.29777	0.589217	-0.859308
00000002_8.tif	control	MT15620	cat2(n4547)	12.828	10.281	4.86458	1.95978	-2.9048	0	0.29777	0.583562	-0.864963
00000002_8.tif	control	MT15620	cat2(n4547)	13.026	10.474	4.86458	1.70202	-3.16256	0	0.29777	0.50681	-0.941715
00000002_8.tif	control	MT15620	cat2(n4547)	13.333	10.615	4.86458	1.47049	-3.39408	0	0.29777	0.437869	-1.01066
00000002_8.tif	control	MT15620	cat2(n4547)	13.516	10.76	4.86458	1.29349	-3.57109	0	0.29777	0.385162	-1.06336
00000002_8.tif	control	MT15620	cat2(n4547)	13.781	10.37	4.86458	1.67458	-3.18999	0	0.29777	0.498641	-0.949884
00000002_8.tif	control	MT15620	cat2(n4547)	13.344	9.984	4.86458	2.08655	-2.77803	0	0.29777	0.621313	-0.827213
00000002_8.tif	control	MT15620	cat2(n4547)	13.255	9.688	4.86458	2.39349	-2.47109	0	0.29777	0.71271	-0.735815
00000002_8.tif	control	MT15620	cat2(n4547)	13.062	9.245	4.86458	2.8662	-1.99838	0	0.29777	0.853467	-0.595058
00000002_8.tif	control	MT15620	cat2(n4547)	12.984	8.891	4.86458	3.22869	-1.63589	0	0.29777	0.961406	-0.487119
00000002_8.tif	control	MT15620	cat2(n4547)	13.594	9.151	4.86458	2.89253	-1.97205	0	0.29777	0.861308	-0.587217
00000002_8.tif	control	MT15620	cat2(n4547)	14.193	9.635	4.86458	2.45941	-2.40517	0	0.29777	0.732337	-0.716188
00000002_8.tif	control	MT15620	cat2(n4547)	14.224	9.823	4.86458	2.28282	-2.58176	0	0.29777	0.679755	-0.768771
00000002_8.tif	control	MT15620	cat2(n4547)	14.484	9.969	4.86458	2.22057	-2.644	0	0.29777	0.66122	-0.787305
00000002_8.tif	control	MT15620	cat2(n4547)	14.547	9.938	4.86458	2.2726	-2.59198	0	0.29777	0.676711	-0.771814
00000002_8.tif	control	MT15620	cat2(n4547)	14.177	9.224	4.86458	2.86011	-2.00446	0	0.29777	0.851656	-0.596869
00000002_8.tif	control	MT15620	cat2(n4547)	14.161	8.984	4.86458	3.09436	-1.77021	0	0.29777	0.921409	-0.527116
00000002_8.tif	control	MT15620	cat2(n4547)	14.422	8.958	4.86458	3.17014	-1.69443	0	0.29777	0.943974	-0.504551
00000002_8.tif	control	MT15620	cat2(n4547)	14.568	9.273	4.86458	2.90547	-1.95911	0	0.29777	0.865162	-0.583363
00000002_8.tif	control	MT15620	cat2(n4547)	15.047	8.703	4.86458	3.60497	-1.25961	0	0.29777	1.07345	-0.375074
00000002_8.tif	control	MT15620	cat2(n4547)	14.615	10.844	4.86458	1.51477	-3.34981	0	0.29777	0.451054	-0.997472
00000002_8.tif	control	MT15620	cat2(n4547)	14.516	10.734	4.86458	1.54805	-3.31653	0	0.29777	0.460962	-0.987563
00000002_8.tif	control	MT15620	cat2(n4547)	15.094	10.974	4.86458	1.76563	-3.09894	0	0.29777	0.525753	-0.922773
00000002_8.tif	control	MT15620	cat2(n4547)	15.208	11.146	4.86458	1.76443	-3.10015	0	0.29777	0.525395	-0.923131
00000002_8.tif	control	MT15620	cat2(n4547)	15.401	11.682	4.86458	1.75042	-3.11416	0	0.29777	0.521222	-0.927303
00000002_8.tif	control	MT15620	cat2(n4547)	15.016	10.703	4.86458	1.88587	-2.97871	0	0.29777	0.561555	-0.88697
00000002_8.tif	control	MT15620	cat2(n4547)	15.099	10.635	4.86458	1.99263	-2.87195	0	0.29777	0.593345	-0.85518
00000002_8.tif	control	MT15620	cat2(n4547)	15.939	9.29	4.86458	3.55535	-1.30923	0	0.29777	1.05868	-0.389849
00000002_8.tif	control	MT15620	cat2(n4547)	15.922	9.852	4.86458	3.1284	-1.73618	0	0.29777	0.931542	-0.516983
00000002_8.tif	control	MT15620	cat2(n4547)	15.505	9.939	4.86458	2.77923	-2.08535	0	0.29777	0.82757	-0.620955
00000002_8.tif	control	MT15620	cat2(n4547)	15.509	10.394	4.86458	2.456	-2.40858	0	0.29777	0.731324	-0.717202
00000002_8.tif	control	MT15620	cat2(n4547)	17.075	9.839	4.86458	4.04042	-0.824159	0	0.29777	1.20312	-0.24541
00000002_8.tif	control	MT15620	cat2(n4547)	16.766	10.648	4.86458	3.37895	-1.48562	0	0.29777	1.00615	-0.442374
00000002_8.tif	control	MT15620	cat2(n4547)	16.832	10.623	4.86458	3.44939	-1.41519	0	0.29777	1.02713	-0.4214
00000002_8.tif	control	MT15620	cat2(n4547)	16.863	10.734	4.86458	3.43387	-1.4307	0	0.29777	1.0225	-0.426021
00000002_8.tif	control	MT15620	cat2(n4547)	17.189	10.755	4.86458	3.73006	-1.13451	0	0.29777	1.1107	-0.337824
00000002_8.tif	control	MT15620	cat2(n4547)	17.366	10.967	4.86458	3.83188	-1.0327	0	0.29777	1.14102	-0.307506
00000002_8.tif	control	MT15620	cat2(n4547)	15.599	11.724	4.86458	1.93728	-2.9273	0	0.29777	0.576863	-0.871662
00000002_8.tif	control	MT15620	cat2(n4547)	15.259	11.977	4.86458	1.57234	-3.29223	0	0.29777	0.468197	-0.980328
00000002_8.tif	control	MT15620	cat2(n4547)	15.418	12.002	4.86458	1.73046	-3.13411	0	0.29777	0.51528	-0.933245
00000002_8.tif	control	MT15620	cat2(n4547)	15.589	12.304	4.86458	1.91897	-2.94561	0	0.29777	0.571412	-0.877114
00000002_8.tif	control	MT15620	cat2(n4547)	16.002	11.908	4.86458	2.31788	-2.5467	0	0.29777	0.690194	-0.758331
00000002_8.tif	control	MT15620	cat2(n4547)	16.53	11.227	4.86458	2.95655	-1.90803	0	0.29777	0.880372	-0.568153
00000002_8.tif	control	MT15620	cat2(n4547)	16.422	12.092	4.86458	2.73446	-2.13012	0	0.29777	0.814239	-0.634286
00000002_8.tif	control	MT15620	cat2(n4547)	16.512	12.078	4.86458	2.82423	-2.04035	0	0.29777	0.840971	-0.607554
00000002_8.tif	control	MT15620	cat2(n4547)	16.345	12.28	4.86458	2.66764	-2.19694	0	0.29777	0.794343	-0.654183
00000002_8.tif	control	MT15620	cat2(n4547)	16.026	12.467	4.86458	2.37631	-2.48826	0	0.29777	0.707595	-0.74093
00000002_8.tif	control	MT15620	cat2(n4547)	17.411	12.214	4.86458	3.72697	-1.13761	0	0.29777	1.10978	-0.338745
00000002_8.tif	control	MT15620	cat2(n4547)	16.668	12.811	4.86458	3.07762	-1.78695	0	0.29777	0.916424	-0.532101
00000002_8.tif	control	MT15620	cat2(n4547)	15.398	12.797	4.86458	1.86926	-2.99532	0	0.29777	0.556609	-0.891916
00000002_8.tif	control	MT15620	cat2(n4547)	15.349	13.158	4.86458	2.00109	-2.86348	0	0.29777	0.595866	-0.852659
00000002_8.tif	control	MT15620	cat2(n4547)	15.509	13.109	4.86458	2.11058	-2.754	0	0.29777	0.628466	-0.820059
00000002_8.tif	control	MT15620	cat2(n4547)	15.328	13.554	4.86458	2.23064	-2.63394	0	0.29777	0.664217	-0.784308
00000002_8.tif	control	MT15620	cat2(n4547)	15.394	13.554	4.86458	2.2796	-2.58498	0	0.29777	0.678797	-0.769728
00000002_8.tif	control	MT15620	cat2(n4547)	15.533	13.644	4.86458	2.44345	-2.42113	0	0.29777	0.727585	-0.72094
00000002_8.tif	control	MT15620	cat2(n4547)	15.766	13.332	4.86458	2.44585	-2.41873	0	0.29777	0.728301	-0.720224
00000002_8.tif	control	MT15620	cat2(n4547)	15.852	13.325	4.86458	2.51575	-2.34883	0	0.29777	0.749114	-0.699411
00000002_8.tif	control	MT15620	cat2(n4547)	15.908	13.22	4.86458	2.51318	-2.3514	0	0.29777	0.74835	-0.700175
00000002_8.tif	control	MT15620	cat2(n4547)	17.012	13.484	4.86458	3.62331	-1.24127	0	0.29777	1.07891	-0.369614
00000002_8.tif	control	MT15620	cat2(n4547)	16.908	13.707	4.86458	3.625	-1.23958	0	0.29777	1.07942	-0.369109
00000002_8.tif	control	MT15620	cat2(n4547)	15.339	14.248	4.86458	2.7554	-2.10918	0	0.29777	0.820476	-0.628049
00000002_8.tif	control	MT15620	cat2(n4547)	15.87	14.036	4.86458	2.95587	-1.90871	0	0.29777	0.880169	-0.568356
00000002_8.tif	control	MT15620	cat2(n4547)	15.655	14.564	4.86458	3.19837	-1.66621	0	0.29777	0.952379	-0.496146
00000002_8.tif	control	MT15620	cat2(n4547)	16.155	14.682	4.86458	3.61327	-1.25131	0	0.29777	1.07592	-0.372603
00000002_8.tif	control	MT15620	cat2(n4547)	16.061	15.12	4.86458	3.88654	-0.978035	0	0.29777	1.1573	-0.291229
00000002_8.tif	control	MT15620	cat2(n4547)	16.207	15.026	4.86458	3.90508	-0.959501	0	0.29777	1.16281	-0.285711
00000002_8.tif	control	MT15620	cat2(n4547)	16.016	15.526	4.86458	4.19021	-0.67437	0	0.29777	1.24772	-0.200807
00000002_8.tif	control	MT15620	cat2(n4547)	15.464	15.217	4.86458	3.63797	-1.22661	0	0.29777	1.08328	-0.365248
00000002_8.tif	control	MT15620	cat2(n4547)	15.45	15.109	4.86458	3.53711	-1.32747	0	0.29777	1.05324	-0.395281
0000002_18.tif	predator	N2	wt	9.026	14.708	4.7606	6.16711	1.4065	1	0.29777	1.83638	0.418814
0000002_18.tif	predator	N2	wt	7.385	14.089	4.7606	7.25354	2.49294	1	0.29777	2.15989	0.742323
0000002_18.tif	predator	N2	wt	6.375	12.49	4.7606	7.71246	2.95186	1	0.29777	2.29654	0.878975
0000002_18.tif	predator	N2	wt	5.682	12.25	4.7606	8.35326	3.59266	1	0.29777	2.48735	1.06979
0000002_18.tif	predator	N2	wt	5.521	11.943	4.7606	8.47202	3.71142	1	0.29777	2.52271	1.10515
0000002_18.tif	predator	N2	wt	5.417	11.708	4.7606	8.55213	3.79152	1	0.29777	2.54657	1.129
0000002_18.tif	predator	N2	wt	6.776	10.63	4.7606	7.1705	2.40989	1	0.29777	2.13516	0.717594
0000002_18.tif	predator	N2	wt	6.385	10.536	4.7606	7.56598	2.80538	1	0.29777	2.25292	0.835357
0000002_18.tif	predator	N2	wt	9.271	9.729	4.7606	4.8315	0.0708962	1	0.29777	1.43868	0.0211108
0000002_18.tif	predator	N2	wt	9.531	9.474	4.7606	4.6569	-0.103708	0	0.29777	1.38668	-0.0308812
0000002_18.tif	predator	N2	wt	9.938	9.042	4.7606	4.44432	-0.316285	0	0.29777	1.32338	-0.0941801
0000002_18.tif	predator	N2	wt	9.828	8.839	4.7606	4.63376	-0.126847	0	0.29777	1.37979	-0.0377712
0000002_18.tif	predator	N2	wt	8.453	8.677	4.7606	5.94848	1.18788	1	0.29777	1.77128	0.353714
0000002_18.tif	predator	N2	wt	10.26	2.057	4.7606	9.65038	4.88977	1	0.29777	2.87359	1.45603
0000002_18.tif	predator	N2	wt	10.391	1.922	4.7606	9.72679	4.96619	1	0.29777	2.89635	1.47878
0000002_18.tif	predator	N2	wt	11.219	2.38	4.7606	9.01863	4.25803	1	0.29777	2.68548	1.26791
0000002_18.tif	predator	N2	wt	11.188	2.203	4.7606	9.19678	4.43617	1	0.29777	2.73852	1.32096
0000002_18.tif	predator	N2	wt	10.547	3.661	4.7606	8.06548	3.30488	1	0.29777	2.40166	0.984094
0000002_18.tif	predator	N2	wt	12.438	3.198	4.7606	7.92426	3.16366	1	0.29777	2.35961	0.942043
0000002_18.tif	predator	N2	wt	13.766	2.568	4.7606	8.41276	3.65215	1	0.29777	2.50507	1.0875
0000002_18.tif	predator	N2	wt	13.87	2.552	4.7606	8.42727	3.66667	1	0.29777	2.50939	1.09182
0000002_18.tif	predator	N2	wt	12.776	4.333	4.7606	6.74682	1.98622	1	0.29777	2.009	0.591435
0000002_18.tif	predator	N2	wt	13.531	4.01	4.7606	6.98087	2.22027	1	0.29777	2.0787	0.66113
0000002_18.tif	predator	N2	wt	13.938	4.49	4.7606	6.489	1.7284	1	0.29777	1.93223	0.514665
0000002_18.tif	predator	N2	wt	13.859	4.839	4.7606	6.14051	1.3799	1	0.29777	1.82846	0.410894
0000002_18.tif	predator	N2	wt	11.042	15.146	4.7606	5.07452	0.313912	1	0.29777	1.51104	0.0934735
0000002_18.tif	predator	N2	wt	10.932	15.271	4.7606	5.23997	0.479368	1	0.29777	1.56031	0.142741
0000002_18.tif	predator	N2	wt	10.073	15.505	4.7606	5.95171	1.19111	1	0.29777	1.77224	0.354677
0000002_18.tif	predator	N2	wt	13.891	17.807	4.7606	6.82816	2.06756	1	0.29777	2.03322	0.615657
0000002_18.tif	predator	N2	wt	13.964	17.875	4.7606	6.89605	2.13545	1	0.29777	2.05344	0.635872
0000002_18.tif	predator	N2	wt	14.052	17.349	4.7606	6.37102	1.61042	1	0.29777	1.8971	0.479534
0000002_18.tif	predator	N2	wt	16.266	20.802	4.7606	10.0951	5.33449	1	0.29777	3.00602	1.58845
0000002_18.tif	predator	N2	wt	16.13	20.521	4.7606	9.79054	5.02993	1	0.29777	2.91533	1.49776
0000002_18.tif	predator	N2	wt	16.172	20.182	4.7606	9.47027	4.70966	1	0.29777	2.81996	1.4024
0000002_18.tif	predator	N2	wt	16.25	20.281	4.7606	9.58502	4.82441	1	0.29777	2.85413	1.43657
0000002_18.tif	predator	N2	wt	15.839	19.943	4.7606	9.16336	4.40275	1	0.29777	2.72857	1.31101
0000002_18.tif	predator	N2	wt	16.089	19.786	4.7606	9.06587	4.30527	1	0.29777	2.69954	1.28198
0000002_18.tif	predator	N2	wt	18.599	19.057	4.7606	9.32625	4.56565	1	0.29777	2.77708	1.35951
0000002_18.tif	predator	N2	wt	18.646	18.062	4.7606	8.50495	3.74435	1	0.29777	2.53252	1.11495
0000002_18.tif	predator	N2	wt	16.901	18.021	4.7606	7.63997	2.87937	1	0.29777	2.27495	0.857389
0000002_18.tif	predator	N2	wt	16.995	18.021	4.7606	7.67691	2.91631	1	0.29777	2.28595	0.86839
0000002_18.tif	predator	N2	wt	17.328	17.833	4.7606	7.64653	2.88593	1	0.29777	2.27691	0.859342
0000002_18.tif	predator	N2	wt	17.417	17.677	4.7606	7.54763	2.78702	1	0.29777	2.24746	0.829891
0000002_18.tif	predator	N2	wt	17.391	14.62	4.7606	5.01798	0.257373	1	0.29777	1.4942	0.076638
0000002_18.tif	predator	N2	wt	18.151	13.745	4.7606	5.03985	0.27925	1	0.29777	1.50072	0.0831523
0000002_18.tif	predator	N2	wt	18.224	13.422	4.7606	4.93336	0.172757	1	0.29777	1.46901	0.0514418
0000002_18.tif	predator	N2	wt	15.839	5.646	4.7606	5.66169	0.901083	1	0.29777	1.68588	0.268315
0000002_18.tif	predator	N2	wt	15.745	5.458	4.7606	5.80919	1.04859	1	0.29777	1.7298	0.312238
0000002_18.tif	predator	N2	wt	14.177	4.255	4.7606	6.72825	1.96764	1	0.29777	2.00347	0.585905
0000002_18.tif	predator	N2	wt	14.224	4.099	4.7606	6.88594	2.12534	1	0.29777	2.05043	0.632862
0000002_18.tif	predator	N2	wt	14.672	4.844	4.7606	6.17875	1.41815	1	0.29777	1.83985	0.422282
0000002_18.tif	predator	N2	wt	14.729	4.703	4.7606	6.32565	1.56505	1	0.29777	1.88359	0.466024
0000002_18.tif	predator	N2	wt	15.661	4.188	4.7606	7.00617	2.24557	1	0.29777	2.08623	0.668662
0000002_18.tif	predator	N2	wt	15.531	4.141	4.7606	7.0211	2.2605	1	0.29777	2.09067	0.673109
0000002_18.tif	predator	N2	wt	17.469	5.167	4.7606	6.80054	2.03993	1	0.29777	2.025	0.607431
0000002_18.tif	predator	N2	wt	17.391	5.062	4.7606	6.85085	2.09024	1	0.29777	2.03998	0.622412
0000002_18.tif	predator	N2	wt	16.812	3.344	4.7606	8.15801	3.3974	1	0.29777	2.42921	1.01165
0000002_18.tif	predator	N2	wt	14.417	2.099	4.7606	8.89291	4.13231	1	0.29777	2.64804	1.23048
0000002_18.tif	predator	N2	wt	14.401	1.943	4.7606	9.04785	4.28725	1	0.29777	2.69418	1.27661
0000002_18.tif	predator	N2	wt	14.974	1.375	4.7606	9.65972	4.89911	1	0.29777	2.87637	1.45881
0000002_18.tif	predator	N2	wt	17.099	2.417	4.7606	9.12687	4.36627	1	0.29777	2.71771	1.30014
0000002_18.tif	predator	N2	wt	17.318	2.781	4.7606	8.86745	4.10684	1	0.29777	2.64046	1.22289
0000002_18.tif	predator	N2	wt	17.271	2.911	4.7606	8.72935	3.96874	1	0.29777	2.59934	1.18177
0000002_18.tif	predator	N2	wt	17.38	3.089	4.7606	8.6081	3.8475	1	0.29777	2.56324	1.14567
0000002_18.tif	predator	N2	wt	18.125	2.917	4.7606	9.08443	4.32382	1	0.29777	2.70507	1.2875
0000002_18.tif	predator	N2	wt	18.719	4.802	4.7606	7.8111	3.0505	1	0.29777	2.32591	0.908346
0000002_18.tif	predator	N2	wt	18.964	5.078	4.7606	7.75129	2.99069	1	0.29777	2.3081	0.890536
0000002_18.tif	predator	N2	wt	18.844	5.198	4.7606	7.58214	2.82153	1	0.29777	2.25773	0.840168
0000002_18.tif	predator	N2	wt	19.651	5.13	4.7606	8.17613	3.41553	1	0.29777	2.43461	1.01704
0000002_18.tif	predator	N2	wt	21.448	5.641	4.7606	9.21381	4.45321	1	0.29777	2.7436	1.32603
0000002_18.tif	predator	N2	wt	21.818	5.729	4.7606	9.46873	4.70813	1	0.29777	2.8195	1.40194
0000002_18.tif	predator	N2	wt	19.661	6.984	4.7606	6.97945	2.21885	1	0.29777	2.07827	0.660707
0000002_18.tif	predator	N2	wt	20.281	6.885	4.7606	7.54947	2.78887	1	0.29777	2.24801	0.830441
0000002_18.tif	predator	N2	wt	20.448	6.74	4.7606	7.76848	3.00787	1	0.29777	2.31322	0.895654
0000002_18.tif	predator	N2	wt	21.224	6.932	4.7606	8.33451	3.5739	1	0.29777	2.48177	1.0642
0000002_18.tif	predator	N2	wt	21.807	8.005	4.7606	8.41224	3.65164	1	0.29777	2.50491	1.08735
0000002_18.tif	predator	N2	wt	19.802	7.771	4.7606	6.68414	1.92354	1	0.29777	1.99034	0.572772
0000002_18.tif	predator	N2	wt	19.958	8.193	4.7606	6.63342	1.87281	1	0.29777	1.97523	0.557667
0000002_18.tif	predator	N2	wt	19.807	9.099	4.7606	6.16276	1.40215	1	0.29777	1.83508	0.417519
0000002_18.tif	predator	N2	wt	20.958	9.417	4.7606	7.19168	2.43108	1	0.29777	2.14147	0.723901
0000002_18.tif	predator	N2	wt	22.318	10.354	4.7606	8.40327	3.64267	1	0.29777	2.50224	1.08468
0000002_18.tif	predator	N2	wt	23.828	12.13	4.7606	9.95675	5.19615	1	0.29777	2.96482	1.54726
0000002_18.tif	predator	N2	wt	23.891	12.062	4.7606	10.0117	5.25114	1	0.29777	2.9812	1.56363
0000002_18.tif	predator	N2	wt	21.411	12.927	4.7606	7.72272	2.96212	1	0.29777	2.29959	0.88203
0000002_18.tif	predator	N2	wt	20.406	13.474	4.7606	6.93254	2.17193	1	0.29777	2.0643	0.646736
0000002_18.tif	predator	N2	wt	21.495	13.839	4.7606	8.08009	3.31949	1	0.29777	2.40601	0.988443
0000002_18.tif	predator	N2	wt	21.724	13.964	4.7606	8.33859	3.57798	1	0.29777	2.48298	1.06542
0000002_18.tif	predator	N2	wt	21.932	14.958	4.7606	8.92953	4.16892	1	0.29777	2.65895	1.24138
0000002_18.tif	predator	N2	wt	19.76	15.661	4.7606	7.47106	2.71046	1	0.29777	2.22466	0.807094
0000002_18.tif	predator	N2	wt	20.516	15.87	4.7606	8.19707	3.43647	1	0.29777	2.44084	1.02328
0000002_18.tif	predator	N2	wt	21.276	15.344	4.7606	8.53812	3.77752	1	0.29777	2.5424	1.12483
0000002_18.tif	predator	N2	wt	20.438	16.474	4.7606	8.51146	3.75086	1	0.29777	2.53446	1.11689
0000002_18.tif	predator	N2	wt	22.526	16.531	4.7606	10.2264	5.46576	1	0.29777	3.0451	1.62754
0000002_18.tif	predator	N2	wt	22.74	16.188	4.7606	10.2278	5.46725	1	0.29777	3.04555	1.62798
0000002_18.tif	predator	N2	wt	22.818	16.125	4.7606	10.2633	5.50272	1	0.29777	3.05611	1.63854
0000002_18.tif	predator	N2	wt	19.406	17.891	4.7606	8.81333	4.05273	1	0.29777	2.62434	1.20678
0000002_18.tif	predator	N2	wt	18.901	18.979	4.7606	9.41442	4.65382	1	0.29777	2.80333	1.38577
0000002_18.tif	predator	N2	wt	20.167	19.146	4.7606	10.2713	5.51073	1	0.29777	3.0585	1.64093
00000005_1.tif	control	CB1112	cat2(e1112)	11.266	16.865	5.18757	5.0718	-0.115772	0	0.29777	1.51023	-0.0344734
00000005_1.tif	control	CB1112	cat2(e1112)	11.641	16.271	5.18757	4.38202	-0.805548	0	0.29777	1.30483	-0.239868
00000005_1.tif	control	CB1112	cat2(e1112)	11.917	16.016	5.18757	4.04999	-1.13758	0	0.29777	1.20596	-0.338738
00000005_1.tif	control	CB1112	cat2(e1112)	11.427	15.411	5.18757	3.68592	-1.50165	0	0.29777	1.09756	-0.447145
00000005_1.tif	control	CB1112	cat2(e1112)	12.677	15.432	5.18757	3.30306	-1.88451	0	0.29777	0.983553	-0.561149
00000005_1.tif	control	CB1112	cat2(e1112)	9.844	15.031	5.18757	4.39447	-0.793097	0	0.29777	1.30854	-0.23616
00000005_1.tif	control	CB1112	cat2(e1112)	10.078	14.391	5.18757	3.81444	-1.37313	0	0.29777	1.13583	-0.408876
00000005_1.tif	control	CB1112	cat2(e1112)	10.276	13.698	5.18757	3.28021	-1.90736	0	0.29777	0.976747	-0.567955
00000005_1.tif	control	CB1112	cat2(e1112)	10.495	13.479	5.18757	2.98571	-2.20186	0	0.29777	0.889055	-0.655647
00000005_1.tif	control	CB1112	cat2(e1112)	10.542	13.359	5.18757	2.89207	-2.2955	0	0.29777	0.861173	-0.68353
00000005_1.tif	control	CB1112	cat2(e1112)	12.026	14.141	5.18757	2.28506	-2.90251	0	0.29777	0.680421	-0.864282
00000005_1.tif	control	CB1112	cat2(e1112)	11.979	13.87	5.18757	2.08217	-3.1054	0	0.29777	0.620006	-0.924696
00000005_1.tif	control	CB1112	cat2(e1112)	11.062	13.083	5.18757	2.30484	-2.88273	0	0.29777	0.686312	-0.858391
00000005_1.tif	control	CB1112	cat2(e1112)	11.406	13.167	5.18757	2.03382	-3.15374	0	0.29777	0.605612	-0.939091
00000005_1.tif	control	CB1112	cat2(e1112)	11.891	12.859	5.18757	1.46036	-3.72721	0	0.29777	0.434852	-1.10985
00000005_1.tif	control	CB1112	cat2(e1112)	12.354	12.776	5.18757	1.02382	-4.16375	0	0.29777	0.304863	-1.23984
00000005_1.tif	control	CB1112	cat2(e1112)	12.661	12.609	5.18757	0.679426	-4.50814	0	0.29777	0.202313	-1.34239
00000005_1.tif	control	CB1112	cat2(e1112)	12.615	12.427	5.18757	0.619229	-4.56834	0	0.29777	0.184388	-1.36031
00000005_1.tif	control	CB1112	cat2(e1112)	12.5	12.375	5.18757	0.708232	-4.47934	0	0.29777	0.21089	-1.33381
00000005_1.tif	control	CB1112	cat2(e1112)	11.135	11.979	5.18757	2.05064	-3.13693	0	0.29777	0.610618	-0.934085
00000005_1.tif	control	CB1112	cat2(e1112)	8.104	11.391	5.18757	5.13201	-0.0555612	0	0.29777	1.52816	-0.0165444
00000005_1.tif	control	CB1112	cat2(e1112)	8.24	11.365	5.18757	5.00172	-0.185852	0	0.29777	1.48936	-0.0553412
00000005_1.tif	control	CB1112	cat2(e1112)	9.844	11.302	5.18757	3.44342	-1.74415	0	0.29777	1.02535	-0.519356
00000005_1.tif	control	CB1112	cat2(e1112)	10.891	11.255	5.18757	2.46121	-2.72636	0	0.29777	0.732874	-0.811829
00000005_1.tif	control	CB1112	cat2(e1112)	11.016	11.135	5.18757	2.39477	-2.79279	0	0.29777	0.713092	-0.83161
00000005_1.tif	control	CB1112	cat2(e1112)	10.641	10.385	5.18757	3.09949	-2.08808	0	0.29777	0.922934	-0.621768
00000005_1.tif	control	CB1112	cat2(e1112)	10.474	10.297	5.18757	3.28681	-1.90076	0	0.29777	0.978713	-0.56599
00000005_1.tif	control	CB1112	cat2(e1112)	10.401	10.219	5.18757	3.39129	-1.79627	0	0.29777	1.00983	-0.534877
00000005_1.tif	control	CB1112	cat2(e1112)	10.391	9.625	5.18757	3.77141	-1.41616	0	0.29777	1.12301	-0.421689
00000005_1.tif	control	CB1112	cat2(e1112)	10.323	9.234	5.18757	4.09241	-1.09516	0	0.29777	1.2186	-0.326106
00000005_1.tif	control	CB1112	cat2(e1112)	11.156	9.875	5.18757	3.05577	-2.1318	0	0.29777	0.909915	-0.634787
00000005_1.tif	control	CB1112	cat2(e1112)	11.234	9.802	5.18757	3.0608	-2.12677	0	0.29777	0.911413	-0.633289
00000005_1.tif	control	CB1112	cat2(e1112)	11.812	8.63	5.18757	3.79125	-1.39632	0	0.29777	1.12892	-0.415781
00000005_1.tif	control	CB1112	cat2(e1112)	11.089	8.432	5.18757	4.27901	-0.908554	0	0.29777	1.27416	-0.27054
00000005_1.tif	control	CB1112	cat2(e1112)	11.578	7.76	5.18757	4.68812	-0.499451	0	0.29777	1.39598	-0.148722
00000005_1.tif	control	CB1112	cat2(e1112)	13.276	8.552	5.18757	3.61636	-1.57121	0	0.29777	1.07684	-0.46786
00000005_1.tif	control	CB1112	cat2(e1112)	13.302	8.615	5.18757	3.5542	-1.63337	0	0.29777	1.05833	-0.486369
00000005_1.tif	control	CB1112	cat2(e1112)	13.5	8.635	5.18757	3.54674	-1.64083	0	0.29777	1.05611	-0.48859
00000005_1.tif	control	CB1112	cat2(e1112)	13.786	8.708	5.18757	3.5122	-1.67537	0	0.29777	1.04583	-0.498874
00000005_1.tif	control	CB1112	cat2(e1112)	14.578	8.172	5.18757	4.23354	-0.954033	0	0.29777	1.26062	-0.284082
00000005_1.tif	control	CB1112	cat2(e1112)	15.292	8.51	5.18757	4.22456	-0.963013	0	0.29777	1.25795	-0.286756
00000005_1.tif	control	CB1112	cat2(e1112)	16.115	9.458	5.18757	3.99631	-1.19126	0	0.29777	1.18998	-0.35472
00000005_1.tif	control	CB1112	cat2(e1112)	13.068	9.604	5.18757	2.56532	-2.62225	0	0.29777	0.763874	-0.780828
00000005_1.tif	control	CB1112	cat2(e1112)	13.151	9.536	5.18757	2.63113	-2.55644	0	0.29777	0.783471	-0.761231
00000005_1.tif	control	CB1112	cat2(e1112)	13.12	9.885	5.18757	2.28271	-2.90486	0	0.29777	0.679723	-0.864979
00000005_1.tif	control	CB1112	cat2(e1112)	13.005	10.432	5.18757	1.7435	-3.44406	0	0.29777	0.519163	-1.02554
00000005_1.tif	control	CB1112	cat2(e1112)	13.776	9.693	5.18757	2.54548	-2.64209	0	0.29777	0.757968	-0.786734
00000005_1.tif	control	CB1112	cat2(e1112)	14.688	9.5	5.18757	3.06529	-2.12228	0	0.29777	0.912752	-0.631951
00000005_1.tif	control	CB1112	cat2(e1112)	14.38	10.667	5.18757	1.92281	-3.26476	0	0.29777	0.572556	-0.972146
00000005_1.tif	control	CB1112	cat2(e1112)	14.38	10.859	5.18757	1.7771	-3.41047	0	0.29777	0.529166	-1.01554
00000005_1.tif	control	CB1112	cat2(e1112)	15.031	10.156	5.18757	2.73522	-2.45235	0	0.29777	0.814467	-0.730236
00000005_1.tif	control	CB1112	cat2(e1112)	15.266	10.5	5.18757	2.6726	-2.51497	0	0.29777	0.795821	-0.748881
00000005_1.tif	control	CB1112	cat2(e1112)	15.562	10.198	5.18757	3.09276	-2.09481	0	0.29777	0.920932	-0.62377
00000005_1.tif	control	CB1112	cat2(e1112)	15.661	10.167	5.18757	3.18908	-1.99849	0	0.29777	0.949614	-0.595089
00000005_1.tif	control	CB1112	cat2(e1112)	15.719	10.094	5.18757	3.28011	-1.90746	0	0.29777	0.976717	-0.567985
00000005_1.tif	control	CB1112	cat2(e1112)	15.635	10.578	5.18757	2.92689	-2.26068	0	0.29777	0.87154	-0.673162
00000005_1.tif	control	CB1112	cat2(e1112)	15.677	10.667	5.18757	2.91548	-2.27209	0	0.29777	0.868141	-0.676561
00000005_1.tif	control	CB1112	cat2(e1112)	13.568	11	5.18757	1.23076	-3.95681	0	0.29777	0.366483	-1.17822
00000005_1.tif	control	CB1112	cat2(e1112)	13.63	10.927	5.18757	1.32015	-3.86741	0	0.29777	0.393103	-1.1516
00000005_1.tif	control	CB1112	cat2(e1112)	14.104	11.354	5.18757	1.233	-3.95457	0	0.29777	0.367151	-1.17755
00000005_1.tif	control	CB1112	cat2(e1112)	14.307	11.688	5.18757	1.22733	-3.96024	0	0.29777	0.365462	-1.17924
00000005_1.tif	control	CB1112	cat2(e1112)	14.714	11.677	5.18757	1.61322	-3.57435	0	0.29777	0.480368	-1.06433
00000005_1.tif	control	CB1112	cat2(e1112)	15.052	11.901	5.18757	1.89377	-3.29379	0	0.29777	0.563909	-0.980793
00000005_1.tif	control	CB1112	cat2(e1112)	15.557	11.698	5.18757	2.42577	-2.7618	0	0.29777	0.722322	-0.822381
00000005_1.tif	control	CB1112	cat2(e1112)	15.771	11.792	5.18757	2.62097	-2.5666	0	0.29777	0.780445	-0.764257
00000005_1.tif	control	CB1112	cat2(e1112)	15.88	11.719	5.18757	2.73987	-2.44769	0	0.29777	0.815852	-0.72885
00000005_1.tif	control	CB1112	cat2(e1112)	15.943	11.703	5.18757	2.80465	-2.38292	0	0.29777	0.83514	-0.709562
00000005_1.tif	control	CB1112	cat2(e1112)	16.115	11.688	5.18757	2.97679	-2.21078	0	0.29777	0.886399	-0.658303
00000005_1.tif	control	CB1112	cat2(e1112)	16.797	11.823	5.18757	3.63631	-1.55126	0	0.29777	1.08278	-0.461919
00000005_1.tif	control	CB1112	cat2(e1112)	16.906	12.391	5.18757	3.73572	-1.45185	0	0.29777	1.11239	-0.432317
00000005_1.tif	control	CB1112	cat2(e1112)	16.839	12.609	5.18757	3.68858	-1.49899	0	0.29777	1.09835	-0.446355
00000005_1.tif	control	CB1112	cat2(e1112)	16.786	12.677	5.18757	3.64486	-1.54271	0	0.29777	1.08533	-0.459373
00000005_1.tif	control	CB1112	cat2(e1112)	16.641	12.547	5.18757	3.48478	-1.70279	0	0.29777	1.03766	-0.507039
00000005_1.tif	control	CB1112	cat2(e1112)	16.109	12.505	5.18757	2.95142	-2.23615	0	0.29777	0.878844	-0.665859
00000005_1.tif	control	CB1112	cat2(e1112)	16.052	12.438	5.18757	2.88774	-2.29982	0	0.29777	0.859884	-0.684819
00000005_1.tif	control	CB1112	cat2(e1112)	13.448	12.276	5.18757	0.292099	-4.89547	0	0.29777	0.0869784	-1.45772
00000005_1.tif	control	CB1112	cat2(e1112)	14.094	12.448	5.18757	0.959088	-4.22848	0	0.29777	0.285588	-1.25911
00000005_1.tif	control	CB1112	cat2(e1112)	14.042	12.547	5.18757	0.944788	-4.24278	0	0.29777	0.28133	-1.26337
00000005_1.tif	control	CB1112	cat2(e1112)	14.167	12.667	5.18757	1.1091	-4.07847	0	0.29777	0.330256	-1.21445
00000005_1.tif	control	CB1112	cat2(e1112)	15.052	12.911	5.18757	2.01722	-3.17035	0	0.29777	0.600666	-0.944036
00000005_1.tif	control	CB1112	cat2(e1112)	12.714	13.208	5.18757	1.13932	-4.04825	0	0.29777	0.339255	-1.20545
00000005_1.tif	control	CB1112	cat2(e1112)	12.766	13.276	5.18757	1.18271	-4.00486	0	0.29777	0.352175	-1.19253
00000005_1.tif	control	CB1112	cat2(e1112)	14.307	13.651	5.18757	1.86525	-3.32232	0	0.29777	0.555415	-0.989287
00000005_1.tif	control	CB1112	cat2(e1112)	15.422	13.708	5.18757	2.723	-2.46457	0	0.29777	0.810826	-0.733876
00000005_1.tif	control	CB1112	cat2(e1112)	15.938	13.536	5.18757	3.08177	-2.1058	0	0.29777	0.917657	-0.627045
00000005_1.tif	control	CB1112	cat2(e1112)	16.167	13.536	5.18757	3.2885	-1.89906	0	0.29777	0.979218	-0.565484
00000005_1.tif	control	CB1112	cat2(e1112)	13.667	14.365	5.18757	2.25196	-2.93561	0	0.29777	0.670565	-0.874138
00000005_1.tif	control	CB1112	cat2(e1112)	13.62	14.443	5.18757	2.31871	-2.86886	0	0.29777	0.690443	-0.85426
00000005_1.tif	control	CB1112	cat2(e1112)	14.74	14.37	5.18757	2.70114	-2.48643	0	0.29777	0.80432	-0.740383
00000005_1.tif	control	CB1112	cat2(e1112)	14.589	14.844	5.18757	3.02656	-2.16101	0	0.29777	0.901219	-0.643483
00000005_1.tif	control	CB1112	cat2(e1112)	12.87	15.188	5.18757	3.03656	-2.15101	0	0.29777	0.904196	-0.640506
00000005_1.tif	control	CB1112	cat2(e1112)	13.552	15.667	5.18757	3.52003	-1.66754	0	0.29777	1.04816	-0.496543
00000005_1.tif	control	CB1112	cat2(e1112)	14.667	15.812	5.18757	3.93778	-1.24979	0	0.29777	1.17255	-0.372149
00000005_1.tif	control	CB1112	cat2(e1112)	14.109	16.677	5.18757	4.60529	-0.582276	0	0.29777	1.37132	-0.173384
00000005_1.tif	control	CB1112	cat2(e1112)	18.109	11.615	5.18757	4.96279	-0.224775	0	0.29777	1.47777	-0.0669312
00000005_3.tif	control	CB1112	cat2(e1112)	9.583	11.5	5.97911	5.83251	-0.146592	0	0.29777	1.73675	-0.0436506
00000005_3.tif	control	CB1112	cat2(e1112)	13.224	15.25	5.97911	4.05426	-1.92485	0	0.29777	1.20724	-0.573162
00000005_3.tif	control	CB1112	cat2(e1112)	13.911	14.661	5.97911	3.19884	-2.78026	0	0.29777	0.95252	-0.827878
00000005_3.tif	control	CB1112	cat2(e1112)	13.651	13.766	5.97911	2.61085	-3.36826	0	0.29777	0.777431	-1.00297
00000005_3.tif	control	CB1112	cat2(e1112)	11.776	13.625	5.97911	4.04823	-1.93088	0	0.29777	1.20544	-0.574957
00000005_3.tif	control	CB1112	cat2(e1112)	11.443	11.714	5.97911	3.96479	-2.01432	0	0.29777	1.18059	-0.599804
00000005_3.tif	control	CB1112	cat2(e1112)	13.25	11.734	5.97911	2.15827	-3.82083	0	0.29777	0.642669	-1.13773
00000005_3.tif	control	CB1112	cat2(e1112)	13.552	11.615	5.97911	1.86677	-4.11233	0	0.29777	0.555869	-1.22453
00000005_3.tif	control	CB1112	cat2(e1112)	13.823	11.625	5.97911	1.59661	-4.3825	0	0.29777	0.475422	-1.30498
00000005_3.tif	control	CB1112	cat2(e1112)	13.953	11.307	5.97911	1.54528	-4.43383	0	0.29777	0.460138	-1.32026
00000005_3.tif	control	CB1112	cat2(e1112)	13.349	11.177	5.97911	2.15907	-3.82004	0	0.29777	0.642906	-1.13749
00000005_3.tif	control	CB1112	cat2(e1112)	13.49	11.073	5.97911	2.06123	-3.91788	0	0.29777	0.613772	-1.16663
00000005_3.tif	control	CB1112	cat2(e1112)	13.583	10.938	5.97911	2.03085	-3.94825	0	0.29777	0.604726	-1.17567
00000005_3.tif	control	CB1112	cat2(e1112)	13.833	10.615	5.97911	1.98944	-3.98967	0	0.29777	0.592394	-1.188
00000005_3.tif	control	CB1112	cat2(e1112)	14	10.99	5.97911	1.63936	-4.33975	0	0.29777	0.488151	-1.29225
00000005_3.tif	control	CB1112	cat2(e1112)	15.168	11.095	5.97911	0.775428	-5.20368	0	0.29777	0.230899	-1.5495
00000005_3.tif	control	CB1112	cat2(e1112)	14.613	12.425	5.97911	0.989602	-4.9895	0	0.29777	0.294674	-1.48572
00000005_3.tif	control	CB1112	cat2(e1112)	14.335	14.266	5.97911	2.65829	-3.32081	0	0.29777	0.79156	-0.988838
00000005_3.tif	control	CB1112	cat2(e1112)	14.387	13.884	5.97911	2.29019	-3.68892	0	0.29777	0.681949	-1.09845
00000005_3.tif	control	CB1112	cat2(e1112)	14.616	16.175	5.97911	4.41328	-1.56582	0	0.29777	1.31414	-0.466255
00000005_3.tif	control	CB1112	cat2(e1112)	17.29	16.269	5.97911	4.8195	-1.15961	0	0.29777	1.4351	-0.345297
00000005_3.tif	control	CB1112	cat2(e1112)	17.248	16.2	5.97911	4.73958	-1.23952	0	0.29777	1.41131	-0.369092
00000005_3.tif	control	CB1112	cat2(e1112)	18.061	13.79	5.97911	3.29831	-2.68079	0	0.29777	0.982139	-0.798259
00000005_3.tif	control	CB1112	cat2(e1112)	18.304	13.349	5.97911	3.27057	-2.70853	0	0.29777	0.973879	-0.806519
00000005_3.tif	control	CB1112	cat2(e1112)	15.38	12.099	5.97911	0.267268	-5.71184	0	0.29777	0.0795843	-1.70081
00000005_3.tif	control	CB1112	cat2(e1112)	15.457	11.981	5.97911	0.156541	-5.82256	0	0.29777	0.0466131	-1.73379
00000005_3.tif	control	CB1112	cat2(e1112)	15.696	12.075	5.97911	0.377709	-5.6014	0	0.29777	0.11247	-1.66793
00000005_3.tif	control	CB1112	cat2(e1112)	17.3	11.88	5.97911	1.89458	-4.08452	0	0.29777	0.56415	-1.21625
00000005_3.tif	control	CB1112	cat2(e1112)	16.609	11.182	5.97911	1.36785	-4.61126	0	0.29777	0.407304	-1.37309
00000005_3.tif	control	CB1112	cat2(e1112)	17.849	10.773	5.97911	2.66305	-3.31605	0	0.29777	0.792977	-0.987421
00000005_3.tif	control	CB1112	cat2(e1112)	17.203	10.557	5.97911	2.20395	-3.77516	0	0.29777	0.656269	-1.12413
00000005_3.tif	control	CB1112	cat2(e1112)	17.137	10.307	5.97911	2.3076	-3.6715	0	0.29777	0.687135	-1.09326
00000005_3.tif	control	CB1112	cat2(e1112)	19.349	9.286	5.97911	4.69409	-1.28502	0	0.29777	1.39776	-0.38264
00000005_3.tif	control	CB1112	cat2(e1112)	19.665	9.894	5.97911	4.67962	-1.29949	0	0.29777	1.39345	-0.386949
00000005_3.tif	control	CB1112	cat2(e1112)	20.175	10.293	5.97911	5.01148	-0.967623	0	0.29777	1.49227	-0.288129
00000005_3.tif	control	CB1112	cat2(e1112)	20.175	12.078	5.97911	4.77529	-1.20382	0	0.29777	1.42194	-0.35846
00000005_3.tif	control	CB1112	cat2(e1112)	20.182	12.13	5.97911	4.78523	-1.19388	0	0.29777	1.4249	-0.355502
00000005_3.tif	control	CB1112	cat2(e1112)	19.845	14.127	5.97911	4.99671	-0.982391	0	0.29777	1.48787	-0.292527
00000005_3.tif	control	CB1112	cat2(e1112)	20.29	14.276	5.97911	5.46093	-0.51818	0	0.29777	1.6261	-0.154298
00000005_3.tif	control	CB1112	cat2(e1112)	20.304	14.349	5.97911	5.50642	-0.472686	0	0.29777	1.63965	-0.140752
00000005_3.tif	control	CB1112	cat2(e1112)	19.616	15.325	5.97911	5.46975	-0.509356	0	0.29777	1.62873	-0.151671
00000005_9.tif	control	MT15620	cat2(n4547)	12.146	14.802	5.3698	4.10561	-1.26419	0	0.29777	1.22253	-0.376437
00000005_9.tif	control	MT15620	cat2(n4547)	11.807	14.333	5.3698	4.09463	-1.27517	0	0.29777	1.21926	-0.379706
00000005_9.tif	control	MT15620	cat2(n4547)	11.766	14.234	5.3698	4.07665	-1.29315	0	0.29777	1.2139	-0.385061
00000005_9.tif	control	MT15620	cat2(n4547)	12.797	14.161	5.3698	3.19428	-2.17552	0	0.29777	0.95116	-0.647805
00000005_9.tif	control	MT15620	cat2(n4547)	12.802	15.172	5.3698	3.91794	-1.45186	0	0.29777	1.16664	-0.432321
00000005_9.tif	control	MT15620	cat2(n4547)	13.042	15.37	5.3698	3.93539	-1.4344	0	0.29777	1.17184	-0.427123
00000005_9.tif	control	MT15620	cat2(n4547)	13.099	15.312	5.3698	3.85545	-1.51434	0	0.29777	1.14804	-0.450926
00000005_9.tif	control	MT15620	cat2(n4547)	13.208	15.703	5.3698	4.13113	-1.23867	0	0.29777	1.23013	-0.368839
00000005_9.tif	control	MT15620	cat2(n4547)	14.104	15.734	5.3698	3.80033	-1.56947	0	0.29777	1.13162	-0.467341
00000005_9.tif	control	MT15620	cat2(n4547)	14.292	15.828	5.3698	3.83916	-1.53064	0	0.29777	1.14319	-0.455777
00000005_9.tif	control	MT15620	cat2(n4547)	14.25	15.891	5.3698	3.9107	-1.4591	0	0.29777	1.16449	-0.434477
00000005_9.tif	control	MT15620	cat2(n4547)	14.234	15.292	5.3698	3.3397	-2.0301	0	0.29777	0.994463	-0.604502
00000005_9.tif	control	MT15620	cat2(n4547)	14.438	15.26	5.3698	3.2527	-2.1171	0	0.29777	0.968556	-0.630409
00000005_9.tif	control	MT15620	cat2(n4547)	14.417	15.167	5.3698	3.16811	-2.20168	0	0.29777	0.943369	-0.655596
00000005_9.tif	control	MT15620	cat2(n4547)	14.516	15.458	5.3698	3.42742	-1.94237	0	0.29777	1.02058	-0.578381
00000005_9.tif	control	MT15620	cat2(n4547)	14.885	16.068	5.3698	3.97533	-1.39446	0	0.29777	1.18374	-0.41523
00000005_9.tif	control	MT15620	cat2(n4547)	14.917	15.516	5.3698	3.42275	-1.94705	0	0.29777	1.01919	-0.579772
00000005_9.tif	control	MT15620	cat2(n4547)	14.979	15.354	5.3698	3.25588	-2.11391	0	0.29777	0.969505	-0.62946
00000005_9.tif	control	MT15620	cat2(n4547)	15.042	15.146	5.3698	3.04378	-2.32602	0	0.29777	0.906345	-0.692619
00000005_9.tif	control	MT15620	cat2(n4547)	15.214	15.104	5.3698	2.99516	-2.37464	0	0.29777	0.891869	-0.707096
00000005_9.tif	control	MT15620	cat2(n4547)	15.161	15.281	5.3698	3.17311	-2.19669	0	0.29777	0.944858	-0.654107
00000005_9.tif	control	MT15620	cat2(n4547)	15.036	14.958	5.3698	2.85666	-2.51314	0	0.29777	0.850626	-0.748339
00000005_9.tif	control	MT15620	cat2(n4547)	15.125	14.948	5.3698	2.84153	-2.52826	0	0.29777	0.846124	-0.752841
00000005_9.tif	control	MT15620	cat2(n4547)	15.135	14.609	5.3698	2.50242	-2.86738	0	0.29777	0.745145	-0.85382
00000005_9.tif	control	MT15620	cat2(n4547)	14.922	14.354	5.3698	2.26812	-3.10168	0	0.29777	0.675377	-0.923588
00000005_9.tif	control	MT15620	cat2(n4547)	14.906	14.26	5.3698	2.17755	-3.19225	0	0.29777	0.648409	-0.950556
00000005_9.tif	control	MT15620	cat2(n4547)	14.318	14.396	5.3698	2.46773	-2.90207	0	0.29777	0.734816	-0.864149
00000005_9.tif	control	MT15620	cat2(n4547)	13.964	14.276	5.3698	2.51731	-2.85249	0	0.29777	0.749579	-0.849386
00000005_9.tif	control	MT15620	cat2(n4547)	11.833	13.422	5.3698	3.65591	-1.71388	0	0.29777	1.08862	-0.510343
00000005_9.tif	control	MT15620	cat2(n4547)	11.943	13.51	5.3698	3.58692	-1.78288	0	0.29777	1.06808	-0.530887
00000005_9.tif	control	MT15620	cat2(n4547)	11.958	12.589	5.3698	3.32186	-2.04794	0	0.29777	0.989151	-0.609814
00000005_9.tif	control	MT15620	cat2(n4547)	12.208	12.286	5.3698	3.04215	-2.32765	0	0.29777	0.905862	-0.693103
00000005_9.tif	control	MT15620	cat2(n4547)	13.172	13.49	5.3698	2.49088	-2.87892	0	0.29777	0.74171	-0.857255
00000005_9.tif	control	MT15620	cat2(n4547)	14.5	13.182	5.3698	1.30627	-4.06352	0	0.29777	0.388969	-1.21
00000005_9.tif	control	MT15620	cat2(n4547)	14.75	12.943	5.3698	0.969836	-4.39996	0	0.29777	0.288788	-1.31018
00000005_9.tif	control	MT15620	cat2(n4547)	14.927	12.682	5.3698	0.655327	-4.71447	0	0.29777	0.195137	-1.40383
00000005_9.tif	control	MT15620	cat2(n4547)	15.115	13.25	5.3698	1.14838	-4.22142	0	0.29777	0.341954	-1.25701
00000005_9.tif	control	MT15620	cat2(n4547)	15.062	13.312	5.3698	1.21684	-4.15296	0	0.29777	0.362338	-1.23663
00000005_9.tif	control	MT15620	cat2(n4547)	15.062	13.417	5.3698	1.32074	-4.04906	0	0.29777	0.393277	-1.20569
00000005_9.tif	control	MT15620	cat2(n4547)	14.932	13.417	5.3698	1.34493	-4.02487	0	0.29777	0.400479	-1.19849
00000005_9.tif	control	MT15620	cat2(n4547)	11.812	10.62	5.3698	3.74201	-1.62779	0	0.29777	1.11426	-0.484708
00000005_9.tif	control	MT15620	cat2(n4547)	12.672	9.552	5.3698	3.62748	-1.74232	0	0.29777	1.08015	-0.518812
00000005_9.tif	control	MT15620	cat2(n4547)	12.818	9.536	5.3698	3.53704	-1.83276	0	0.29777	1.05322	-0.54574
00000005_9.tif	control	MT15620	cat2(n4547)	12.807	9.625	5.3698	3.48053	-1.88927	0	0.29777	1.0364	-0.562567
00000005_9.tif	control	MT15620	cat2(n4547)	12.932	9.531	5.3698	3.46353	-1.90627	0	0.29777	1.03134	-0.567629
00000005_9.tif	control	MT15620	cat2(n4547)	12.901	9.354	5.3698	3.61723	-1.75257	0	0.29777	1.0771	-0.521862
00000005_9.tif	control	MT15620	cat2(n4547)	12.25	8.839	5.3698	4.43429	-0.935509	0	0.29777	1.3204	-0.278567
00000005_9.tif	control	MT15620	cat2(n4547)	12.438	8.979	5.3698	4.2043	-1.1655	0	0.29777	1.25191	-0.34705
00000005_9.tif	control	MT15620	cat2(n4547)	12.589	8.99	5.3698	4.09664	-1.27315	0	0.29777	1.21986	-0.379107
00000005_9.tif	control	MT15620	cat2(n4547)	12.703	8.828	5.3698	4.15051	-1.21929	0	0.29777	1.2359	-0.363068
00000005_9.tif	control	MT15620	cat2(n4547)	14.135	10.182	5.3698	2.22383	-3.14597	0	0.29777	0.66219	-0.936774
00000005_9.tif	control	MT15620	cat2(n4547)	14.349	10.88	5.3698	1.52094	-3.84886	0	0.29777	0.45289	-1.14607
00000005_9.tif	control	MT15620	cat2(n4547)	14.391	11.464	5.3698	1.07021	-4.29959	0	0.29777	0.318675	-1.28029
00000005_9.tif	control	MT15620	cat2(n4547)	14.042	11.505	5.3698	1.34611	-4.02368	0	0.29777	0.400833	-1.19813
00000005_9.tif	control	MT15620	cat2(n4547)	14.047	11.755	5.3698	1.24921	-4.12059	0	0.29777	0.371977	-1.22699
00000005_9.tif	control	MT15620	cat2(n4547)	14.234	12.286	5.3698	1.02638	-4.34342	0	0.29777	0.305624	-1.29334
00000005_9.tif	control	MT15620	cat2(n4547)	15.031	12.094	5.3698	0.214525	-5.15527	0	0.29777	0.0638791	-1.53509
00000005_9.tif	control	MT15620	cat2(n4547)	15.255	11.693	5.3698	0.41612	-4.95368	0	0.29777	0.123908	-1.47506
00000005_9.tif	control	MT15620	cat2(n4547)	15.198	11.557	5.3698	0.553997	-4.8158	0	0.29777	0.164964	-1.434
00000005_9.tif	control	MT15620	cat2(n4547)	14.984	11.203	5.3698	0.942845	-4.42695	0	0.29777	0.280751	-1.31821
00000005_9.tif	control	MT15620	cat2(n4547)	14.896	9.615	5.3698	2.5183	-2.8515	0	0.29777	0.749874	-0.849091
00000005_9.tif	control	MT15620	cat2(n4547)	15.036	9.219	5.3698	2.89755	-2.47225	0	0.29777	0.862803	-0.736162
00000005_9.tif	control	MT15620	cat2(n4547)	13.312	7.938	5.3698	4.59714	-0.772655	0	0.29777	1.36889	-0.230073
00000005_9.tif	control	MT15620	cat2(n4547)	13.385	7.911	5.3698	4.5916	-0.778197	0	0.29777	1.36724	-0.231724
00000005_9.tif	control	MT15620	cat2(n4547)	13.969	8.271	5.3698	4.04455	-1.32524	0	0.29777	1.20435	-0.394618
00000005_9.tif	control	MT15620	cat2(n4547)	14.141	8.62	5.3698	3.6595	-1.7103	0	0.29777	1.08969	-0.509276
00000005_9.tif	control	MT15620	cat2(n4547)	15.104	8.443	5.3698	3.66871	-1.70109	0	0.29777	1.09243	-0.506533
00000005_9.tif	control	MT15620	cat2(n4547)	15.177	8.391	5.3698	3.71862	-1.65118	0	0.29777	1.10729	-0.491671
00000005_9.tif	control	MT15620	cat2(n4547)	15.141	7.792	5.3698	4.31825	-1.05155	0	0.29777	1.28585	-0.313119
00000005_9.tif	control	MT15620	cat2(n4547)	17.328	7.839	5.3698	4.75098	-0.618821	0	0.29777	1.4147	-0.184266
00000005_9.tif	control	MT15620	cat2(n4547)	17.536	8.068	5.3698	4.64525	-0.724547	0	0.29777	1.38322	-0.215748
00000005_9.tif	control	MT15620	cat2(n4547)	17.276	8.474	5.3698	4.16391	-1.20588	0	0.29777	1.23989	-0.359076
00000005_9.tif	control	MT15620	cat2(n4547)	17.01	8.464	5.3698	4.04985	-1.31995	0	0.29777	1.20592	-0.393042
00000005_9.tif	control	MT15620	cat2(n4547)	16.953	8.656	5.3698	3.85233	-1.51747	0	0.29777	1.14711	-0.451856
00000005_9.tif	control	MT15620	cat2(n4547)	17.078	8.583	5.3698	3.97399	-1.39581	0	0.29777	1.18333	-0.415631
00000005_9.tif	control	MT15620	cat2(n4547)	16.599	8.656	5.3698	3.70898	-1.66082	0	0.29777	1.10442	-0.494542
00000005_9.tif	control	MT15620	cat2(n4547)	16.745	9.536	5.3698	2.97831	-2.39149	0	0.29777	0.886851	-0.712114
00000005_9.tif	control	MT15620	cat2(n4547)	16.667	9.917	5.3698	2.61284	-2.75696	0	0.29777	0.778026	-0.820939
00000005_9.tif	control	MT15620	cat2(n4547)	16.802	9.953	5.3698	2.65943	-2.71037	0	0.29777	0.791899	-0.807066
00000005_9.tif	control	MT15620	cat2(n4547)	16.839	10.083	5.3698	2.57789	-2.79191	0	0.29777	0.767618	-0.831347
00000005_9.tif	control	MT15620	cat2(n4547)	17.089	10.099	5.3698	2.72772	-2.64208	0	0.29777	0.812232	-0.786733
00000005_9.tif	control	MT15620	cat2(n4547)	17.229	10.13	5.3698	2.80227	-2.56753	0	0.29777	0.834431	-0.764534
00000005_9.tif	control	MT15620	cat2(n4547)	17.609	9.427	5.3698	3.57514	-1.79466	0	0.29777	1.06457	-0.534396
00000005_9.tif	control	MT15620	cat2(n4547)	18.193	9.948	5.3698	3.65522	-1.71458	0	0.29777	1.08841	-0.51055
00000005_9.tif	control	MT15620	cat2(n4547)	18.432	10.266	5.3698	3.68152	-1.68827	0	0.29777	1.09625	-0.502718
00000005_9.tif	control	MT15620	cat2(n4547)	18.552	10.391	5.3698	3.72663	-1.64317	0	0.29777	1.10968	-0.489286
00000005_9.tif	control	MT15620	cat2(n4547)	19.01	10.656	5.3698	4.03565	-1.33415	0	0.29777	1.20169	-0.397271
00000005_9.tif	control	MT15620	cat2(n4547)	18.797	10.844	5.3698	3.77053	-1.59926	0	0.29777	1.12275	-0.476213
00000005_9.tif	control	MT15620	cat2(n4547)	18.646	11.078	5.3698	3.55384	-1.81596	0	0.29777	1.05823	-0.540739
00000005_9.tif	control	MT15620	cat2(n4547)	18.698	11.182	5.3698	3.57527	-1.79453	0	0.29777	1.06461	-0.534358
00000005_9.tif	control	MT15620	cat2(n4547)	19.167	10.891	5.3698	4.10678	-1.26302	0	0.29777	1.22287	-0.37609
00000005_9.tif	control	MT15620	cat2(n4547)	19.365	11.245	5.3698	4.20962	-1.16018	0	0.29777	1.2535	-0.345467
00000005_9.tif	control	MT15620	cat2(n4547)	18.281	10.953	5.3698	3.24864	-2.12116	0	0.29777	0.967346	-0.631619
00000005_9.tif	control	MT15620	cat2(n4547)	17.37	10.703	5.3698	2.54803	-2.82177	0	0.29777	0.758727	-0.840238
00000005_9.tif	control	MT15620	cat2(n4547)	15.682	10.625	5.3698	1.54701	-3.82279	0	0.29777	0.460652	-1.13831
00000005_9.tif	control	MT15620	cat2(n4547)	16.297	10.651	5.3698	1.79791	-3.57189	0	0.29777	0.535363	-1.0636
00000005_9.tif	control	MT15620	cat2(n4547)	16.318	10.844	5.3698	1.65878	-3.71102	0	0.29777	0.493935	-1.10503
00000005_9.tif	control	MT15620	cat2(n4547)	16.406	11.141	5.3698	1.5116	-3.8582	0	0.29777	0.45011	-1.14885
00000005_9.tif	control	MT15620	cat2(n4547)	16.5	11.292	5.3698	1.4975	-3.8723	0	0.29777	0.445911	-1.15305
00000005_9.tif	control	MT15620	cat2(n4547)	16.797	10.818	5.3698	2.01876	-3.35104	0	0.29777	0.601126	-0.997839
00000005_9.tif	control	MT15620	cat2(n4547)	16.891	10.396	5.3698	2.37564	-2.99415	0	0.29777	0.707396	-0.891569
00000005_9.tif	control	MT15620	cat2(n4547)	17.01	10.948	5.3698	2.11262	-3.25718	0	0.29777	0.629074	-0.969891
00000005_9.tif	control	MT15620	cat2(n4547)	17.182	11	5.3698	2.23201	-3.13779	0	0.29777	0.664624	-0.934341
00000005_9.tif	control	MT15620	cat2(n4547)	17.615	11.068	5.3698	2.58855	-2.78125	0	0.29777	0.770792	-0.828173
00000005_9.tif	control	MT15620	cat2(n4547)	15.865	11.484	5.3698	0.880355	-4.48944	0	0.29777	0.262143	-1.33682
00000005_9.tif	control	MT15620	cat2(n4547)	15.708	11.703	5.3698	0.615796	-4.754	0	0.29777	0.183366	-1.4156
00000005_9.tif	control	MT15620	cat2(n4547)	15.844	11.646	5.3698	0.75708	-4.61272	0	0.29777	0.225436	-1.37353
00000005_9.tif	control	MT15620	cat2(n4547)	15.812	11.917	5.3698	0.598626	-4.77117	0	0.29777	0.178253	-1.42071
00000005_9.tif	control	MT15620	cat2(n4547)	15.859	11.901	5.3698	0.648275	-4.72152	0	0.29777	0.193037	-1.40593
00000005_9.tif	control	MT15620	cat2(n4547)	16.219	11.594	5.3698	1.10177	-4.26803	0	0.29777	0.328075	-1.27089
00000005_9.tif	control	MT15620	cat2(n4547)	16.266	12.005	5.3698	1.02628	-4.34352	0	0.29777	0.305596	-1.29337
00000005_9.tif	control	MT15620	cat2(n4547)	19.026	11.646	5.3698	3.80924	-1.56056	0	0.29777	1.13428	-0.464687
00000005_9.tif	control	MT15620	cat2(n4547)	18.969	11.833	5.3698	3.73421	-1.63558	0	0.29777	1.11194	-0.487028
00000005_9.tif	control	MT15620	cat2(n4547)	18.984	11.911	5.3698	3.74424	-1.62556	0	0.29777	1.11492	-0.484043
00000005_9.tif	control	MT15620	cat2(n4547)	19.042	11.984	5.3698	3.79906	-1.57074	0	0.29777	1.13125	-0.46772
00000005_9.tif	control	MT15620	cat2(n4547)	17.005	12.188	5.3698	1.76177	-3.60803	0	0.29777	0.524603	-1.07436
00000005_9.tif	control	MT15620	cat2(n4547)	17.432	12	5.3698	2.18971	-3.18008	0	0.29777	0.652031	-0.946934
00000005_9.tif	control	MT15620	cat2(n4547)	17.401	12.432	5.3698	2.18006	-3.18974	0	0.29777	0.649157	-0.949808
00000005_9.tif	control	MT15620	cat2(n4547)	17.583	12.177	5.3698	2.33899	-3.03081	0	0.29777	0.696481	-0.902484
00000005_9.tif	control	MT15620	cat2(n4547)	16.115	12.609	5.3698	1.00344	-4.36635	0	0.29777	0.298796	-1.30017
00000005_9.tif	control	MT15620	cat2(n4547)	15.646	13.125	5.3698	1.09227	-4.27753	0	0.29777	0.325246	-1.27372
00000005_9.tif	control	MT15620	cat2(n4547)	15.318	13.859	5.3698	1.75152	-3.61828	0	0.29777	0.521551	-1.07741
00000005_9.tif	control	MT15620	cat2(n4547)	15.333	13.74	5.3698	1.63337	-3.73643	0	0.29777	0.486369	-1.1126
00000005_9.tif	control	MT15620	cat2(n4547)	15.922	13.807	5.3698	1.82799	-3.54181	0	0.29777	0.544319	-1.05465
00000005_9.tif	control	MT15620	cat2(n4547)	15.839	13.302	5.3698	1.3327	-4.0371	0	0.29777	0.396838	-1.20213
00000005_9.tif	control	MT15620	cat2(n4547)	15.927	13.333	5.3698	1.40118	-3.96862	0	0.29777	0.417229	-1.18174
00000005_9.tif	control	MT15620	cat2(n4547)	16.052	13.391	5.3698	1.51485	-3.85495	0	0.29777	0.451077	-1.14789
00000005_9.tif	control	MT15620	cat2(n4547)	17.599	13.161	5.3698	2.57838	-2.79142	0	0.29777	0.767763	-0.831202
00000005_9.tif	control	MT15620	cat2(n4547)	17.604	12.88	5.3698	2.4818	-2.888	0	0.29777	0.739005	-0.85996
00000005_9.tif	control	MT15620	cat2(n4547)	17.724	12.922	5.3698	2.60891	-2.76089	0	0.29777	0.776855	-0.82211
00000005_9.tif	control	MT15620	cat2(n4547)	17.693	12.745	5.3698	2.52927	-2.84053	0	0.29777	0.75314	-0.845825
00000005_9.tif	control	MT15620	cat2(n4547)	18.63	12.812	5.3698	3.45723	-1.91257	0	0.29777	1.02946	-0.569506
00000005_9.tif	control	MT15620	cat2(n4547)	18.635	12.714	5.3698	3.44356	-1.92624	0	0.29777	1.02539	-0.573575
00000005_9.tif	control	MT15620	cat2(n4547)	18.667	12.474	5.3698	3.44141	-1.92839	0	0.29777	1.02475	-0.574216
00000005_9.tif	control	MT15620	cat2(n4547)	19.188	12.583	5.3698	3.97139	-1.39841	0	0.29777	1.18256	-0.416405
00000005_9.tif	control	MT15620	cat2(n4547)	19.24	12.927	5.3698	4.07789	-1.29191	0	0.29777	1.21427	-0.384693
00000005_9.tif	control	MT15620	cat2(n4547)	17.052	13.656	5.3698	2.37875	-2.99105	0	0.29777	0.708321	-0.890644
00000005_9.tif	control	MT15620	cat2(n4547)	17.094	14.031	5.3698	2.667	-2.7028	0	0.29777	0.794152	-0.804813
00000005_9.tif	control	MT15620	cat2(n4547)	17.411	13.609	5.3698	2.63468	-2.73512	0	0.29777	0.78453	-0.814435
00000005_9.tif	control	MT15620	cat2(n4547)	17.5	13.734	5.3698	2.77951	-2.59029	0	0.29777	0.827653	-0.771312
00000005_9.tif	control	MT15620	cat2(n4547)	17.974	13.745	5.3698	3.18181	-2.18799	0	0.29777	0.947449	-0.651516
00000005_9.tif	control	MT15620	cat2(n4547)	18.208	13.656	5.3698	3.34254	-2.02726	0	0.29777	0.995308	-0.603657
00000005_9.tif	control	MT15620	cat2(n4547)	18.938	13.516	5.3698	3.95195	-1.41785	0	0.29777	1.17677	-0.422193
00000005_9.tif	control	MT15620	cat2(n4547)	19.125	13.375	5.3698	4.08132	-1.28848	0	0.29777	1.21529	-0.383671
00000005_9.tif	control	MT15620	cat2(n4547)	16.141	15.104	5.3698	3.12615	-2.24364	0	0.29777	0.930875	-0.66809
00000005_9.tif	control	MT15620	cat2(n4547)	18.448	14.359	5.3698	3.9143	-1.4555	0	0.29777	1.16556	-0.433405
00000005_9.tif	control	MT15620	cat2(n4547)	18.536	14.943	5.3698	4.34307	-1.02673	0	0.29777	1.29324	-0.30573
00000005_9.tif	control	MT15620	cat2(n4547)	17.479	15.385	5.3698	3.96522	-1.40458	0	0.29777	1.18072	-0.418243
00000005_9.tif	control	MT15620	cat2(n4547)	17.458	15.62	5.3698	4.15024	-1.21956	0	0.29777	1.23582	-0.363148
00000005_9.tif	control	MT15620	cat2(n4547)	16.875	16.208	5.3698	4.4112	-0.958597	0	0.29777	1.31352	-0.285441
00000005_9.tif	control	MT15620	cat2(n4547)	16.177	15.948	5.3698	3.95051	-1.41929	0	0.29777	1.17634	-0.422621
00000005_9.tif	control	MT15620	cat2(n4547)	16.24	15.865	5.3698	3.88556	-1.48424	0	0.29777	1.157	-0.441962
00000005_9.tif	control	MT15620	cat2(n4547)	16.349	15.677	5.3698	3.73489	-1.6349	0	0.29777	1.11214	-0.486825
00000005_9.tif	control	MT15620	cat2(n4547)	15.812	15.818	5.3698	3.75209	-1.61771	0	0.29777	1.11726	-0.481705
00000005_9.tif	control	MT15620	cat2(n4547)	15.865	16.167	5.3698	4.10509	-1.26471	0	0.29777	1.22237	-0.376592
00000005_9.tif	control	MT15620	cat2(n4547)	15.521	16.036	5.3698	3.93669	-1.43311	0	0.29777	1.17223	-0.426738
00000005_9.tif	control	MT15620	cat2(n4547)	15.396	15.896	5.3698	3.79001	-1.57979	0	0.29777	1.12855	-0.470414
00000005_9.tif	control	MT15620	cat2(n4547)	16.042	16.562	5.3698	4.52376	-0.846037	0	0.29777	1.34704	-0.251924
00000005_9.tif	control	MT15620	cat2(n4547)	16.208	16.583	5.3698	4.57647	-0.793332	0	0.29777	1.36273	-0.236231
00000005_9.tif	control	MT15620	cat2(n4547)	16.25	17.135	5.3698	5.1255	-0.244303	0	0.29777	1.52622	-0.0727462
00000006_5.tif	predator	CB1112	cat2(e1112)	8.245	17.365	5.7554	9.11438	3.35898	1	0.29777	2.71399	1.0002
00000006_5.tif	predator	CB1112	cat2(e1112)	8.344	17.505	5.7554	9.13558	3.38018	1	0.29777	2.7203	1.00652
00000006_5.tif	predator	CB1112	cat2(e1112)	11.186	10.655	5.7554	3.90137	-1.85403	0	0.29777	1.16171	-0.552075
00000006_5.tif	predator	CB1112	cat2(e1112)	12.071	8.075	5.7554	4.37055	-1.38484	0	0.29777	1.30142	-0.412365
00000006_5.tif	predator	CB1112	cat2(e1112)	14.738	16.655	5.7554	5.37726	-0.378134	0	0.29777	1.60119	-0.112597
00000006_5.tif	predator	CB1112	cat2(e1112)	15.13	16.661	5.7554	5.37582	-0.379576	0	0.29777	1.60076	-0.113026
00000006_5.tif	predator	CB1112	cat2(e1112)	14.818	16.255	5.7554	4.97378	-0.781618	0	0.29777	1.48104	-0.232742
00000006_5.tif	predator	CB1112	cat2(e1112)	14.901	16.252	5.7554	4.96783	-0.787563	0	0.29777	1.47927	-0.234513
00000006_5.tif	predator	CB1112	cat2(e1112)	14.707	11.714	5.7554	0.539838	-5.21556	0	0.29777	0.160748	-1.55304
00000006_5.tif	predator	CB1112	cat2(e1112)	14.467	10.547	5.7554	0.932675	-4.82272	0	0.29777	0.277723	-1.43606
00000006_5.tif	predator	CB1112	cat2(e1112)	14.439	10.189	5.7554	1.24893	-4.50647	0	0.29777	0.371893	-1.34189
00000006_5.tif	predator	CB1112	cat2(e1112)	15.238	7.491	5.7554	3.80037	-1.95503	0	0.29777	1.13164	-0.582148
00000006_5.tif	predator	CB1112	cat2(e1112)	15.512	7.366	5.7554	3.94879	-1.8066	0	0.29777	1.17583	-0.537952
00000006_5.tif	predator	CB1112	cat2(e1112)	15.366	7.3	5.7554	3.99964	-1.75576	0	0.29777	1.19097	-0.522813
00000006_5.tif	predator	CB1112	cat2(e1112)	16.016	8.21	5.7554	3.22834	-2.52706	0	0.29777	0.961303	-0.752482
00000006_5.tif	predator	CB1112	cat2(e1112)	16.679	11.488	5.7554	1.65537	-4.10003	0	0.29777	0.49292	-1.22086
00000006_5.tif	predator	CB1112	cat2(e1112)	16.321	15.116	5.7554	4.03982	-1.71558	0	0.29777	1.20294	-0.510848
00000006_5.tif	predator	CB1112	cat2(e1112)	16.102	15.217	5.7554	4.07297	-1.68242	0	0.29777	1.21281	-0.500975
00000006_5.tif	predator	CB1112	cat2(e1112)	17.175	15.811	5.7554	5.00509	-0.750305	0	0.29777	1.49037	-0.223418
00000006_5.tif	predator	CB1112	cat2(e1112)	18.3	13.068	5.7554	3.71877	-2.03663	0	0.29777	1.10734	-0.606448
00000006_5.tif	predator	CB1112	cat2(e1112)	18.033	12.727	5.7554	3.32543	-2.42997	0	0.29777	0.990214	-0.723571
00000006_5.tif	predator	CB1112	cat2(e1112)	18.182	12.71	5.7554	3.45327	-2.30212	0	0.29777	1.02828	-0.685504
00000006_5.tif	predator	CB1112	cat2(e1112)	18.727	10.807	5.7554	3.72195	-2.03345	0	0.29777	1.10829	-0.605499
00000006_5.tif	predator	CB1112	cat2(e1112)	17.818	7.595	5.7554	4.62201	-1.13338	0	0.29777	1.3763	-0.337488
00000006_5.tif	predator	CB1112	cat2(e1112)	17.793	7.509	5.7554	4.67619	-1.0792	0	0.29777	1.39243	-0.321355
00000006_7.tif	control	MT15620	cat2(n4547)	11.634	15.547	5.37507	4.88664	-0.488432	0	0.29777	1.45509	-0.14544
00000006_7.tif	control	MT15620	cat2(n4547)	11.998	15.509	5.37507	4.77517	-0.5999	0	0.29777	1.4219	-0.178632
00000006_7.tif	control	MT15620	cat2(n4547)	12.068	15.457	5.37507	4.71251	-0.662559	0	0.29777	1.40325	-0.19729
00000006_7.tif	control	MT15620	cat2(n4547)	12.366	15.429	5.37507	4.6475	-0.727575	0	0.29777	1.38389	-0.21665
00000006_7.tif	control	MT15620	cat2(n4547)	11.582	14.78	5.37507	4.16088	-1.2142	0	0.29777	1.23898	-0.361551
00000006_7.tif	control	MT15620	cat2(n4547)	11.988	14.502	5.37507	3.78848	-1.58659	0	0.29777	1.1281	-0.472439
00000006_7.tif	control	MT15620	cat2(n4547)	12.227	14.724	5.37507	3.96393	-1.41115	0	0.29777	1.18034	-0.420197
00000006_7.tif	control	MT15620	cat2(n4547)	12.273	14.644	5.37507	3.87825	-1.49682	0	0.29777	1.15483	-0.445709
00000006_7.tif	control	MT15620	cat2(n4547)	12.47	14.453	5.37507	3.66606	-1.70901	0	0.29777	1.09164	-0.508891
00000006_7.tif	control	MT15620	cat2(n4547)	10.981	14.29	5.37507	3.93474	-1.44033	0	0.29777	1.17165	-0.428887
00000006_7.tif	control	MT15620	cat2(n4547)	10.731	13.821	5.37507	3.66107	-1.71401	0	0.29777	1.09016	-0.51038
00000006_7.tif	control	MT15620	cat2(n4547)	12.429	13.72	5.37507	2.94174	-2.43333	0	0.29777	0.875963	-0.724572
00000006_7.tif	control	MT15620	cat2(n4547)	11.293	13.335	5.37507	2.94842	-2.42665	0	0.29777	0.87795	-0.722585
00000006_7.tif	control	MT15620	cat2(n4547)	8.925	12.335	5.37507	4.16908	-1.20599	0	0.29777	1.24143	-0.359109
00000006_7.tif	control	MT15620	cat2(n4547)	9.043	12.422	5.37507	4.09322	-1.28185	0	0.29777	1.21884	-0.381696
00000006_7.tif	control	MT15620	cat2(n4547)	9.127	12.418	5.37507	4.01461	-1.36046	0	0.29777	1.19543	-0.405105
00000006_7.tif	control	MT15620	cat2(n4547)	10.658	11.96	5.37507	2.43674	-2.93833	0	0.29777	0.725588	-0.874947
00000006_7.tif	control	MT15620	cat2(n4547)	10.825	11.766	5.37507	2.19951	-3.17557	0	0.29777	0.654947	-0.945588
00000006_7.tif	control	MT15620	cat2(n4547)	11.012	11.97	5.37507	2.13736	-3.23771	0	0.29777	0.636443	-0.964092
00000006_7.tif	control	MT15620	cat2(n4547)	11.245	12.241	5.37507	2.12013	-3.25494	0	0.29777	0.631312	-0.969223
00000006_7.tif	control	MT15620	cat2(n4547)	11.286	11.915	5.37507	1.8807	-3.49437	0	0.29777	0.560015	-1.04052
00000006_7.tif	control	MT15620	cat2(n4547)	11.477	12.068	5.37507	1.83259	-3.54248	0	0.29777	0.54569	-1.05485
00000006_7.tif	control	MT15620	cat2(n4547)	11.609	11.804	5.37507	1.55796	-3.81711	0	0.29777	0.463915	-1.13662
00000006_7.tif	control	MT15620	cat2(n4547)	11.585	12.53	5.37507	2.11355	-3.26153	0	0.29777	0.62935	-0.971185
00000006_7.tif	control	MT15620	cat2(n4547)	11.863	12.589	5.37507	2.01869	-3.35639	0	0.29777	0.601104	-0.999431
00000006_7.tif	control	MT15620	cat2(n4547)	11.877	12.457	5.37507	1.89596	-3.47912	0	0.29777	0.564559	-1.03598
00000006_7.tif	control	MT15620	cat2(n4547)	12.102	12.387	5.37507	1.73269	-3.64238	0	0.29777	0.515944	-1.08459
00000006_7.tif	control	MT15620	cat2(n4547)	12.155	12.248	5.37507	1.58415	-3.79092	0	0.29777	0.471712	-1.12882
00000006_7.tif	control	MT15620	cat2(n4547)	12.203	12.141	5.37507	1.46687	-3.9082	0	0.29777	0.436791	-1.16374
00000006_7.tif	control	MT15620	cat2(n4547)	12.658	12.786	5.37507	1.98922	-3.38585	0	0.29777	0.59233	-1.00821
00000006_7.tif	control	MT15620	cat2(n4547)	12.481	11.814	5.37507	1.06169	-4.31338	0	0.29777	0.316139	-1.2844
00000006_7.tif	control	MT15620	cat2(n4547)	12.745	11.832	5.37507	1.03158	-4.3435	0	0.29777	0.307172	-1.29336
00000006_7.tif	control	MT15620	cat2(n4547)	12.668	11.602	5.37507	0.811145	-4.56393	0	0.29777	0.241535	-1.359
00000006_7.tif	control	MT15620	cat2(n4547)	10.655	11.3	5.37507	2.204	-3.17107	0	0.29777	0.656285	-0.94425
00000006_7.tif	control	MT15620	cat2(n4547)	8.387	10.821	5.37507	4.41504	-0.960031	0	0.29777	1.31467	-0.285868
00000006_7.tif	control	MT15620	cat2(n4547)	10.533	10.509	5.37507	2.28784	-3.08723	0	0.29777	0.68125	-0.919285
00000006_7.tif	control	MT15620	cat2(n4547)	11.203	10.873	5.37507	1.60058	-3.7745	0	0.29777	0.476603	-1.12393
00000006_7.tif	control	MT15620	cat2(n4547)	10.714	9.943	5.37507	2.25779	-3.11728	0	0.29777	0.672303	-0.928232
00000006_7.tif	control	MT15620	cat2(n4547)	10.852	10.099	5.37507	2.07285	-3.30222	0	0.29777	0.617233	-0.983302
00000006_7.tif	control	MT15620	cat2(n4547)	10.984	9.981	5.37507	1.99478	-3.38029	0	0.29777	0.593987	-1.00655
00000006_7.tif	control	MT15620	cat2(n4547)	11.106	9.818	5.37507	1.96078	-3.41429	0	0.29777	0.583863	-1.01667
00000006_7.tif	control	MT15620	cat2(n4547)	11.707	10.443	5.37507	1.15235	-4.22272	0	0.29777	0.343135	-1.2574
00000006_7.tif	control	MT15620	cat2(n4547)	11.783	10.061	5.37507	1.25994	-4.11513	0	0.29777	0.375172	-1.22536
00000006_7.tif	control	MT15620	cat2(n4547)	12.415	11.189	5.37507	0.547301	-4.82777	0	0.29777	0.16297	-1.43757
00000006_7.tif	control	MT15620	cat2(n4547)	12.366	10.738	5.37507	0.440672	-4.9344	0	0.29777	0.131219	-1.46932
00000006_7.tif	control	MT15620	cat2(n4547)	12.182	10.526	5.37507	0.678657	-4.69641	0	0.29777	0.202084	-1.39845
00000006_7.tif	control	MT15620	cat2(n4547)	12.411	10.484	5.37507	0.503989	-4.87108	0	0.29777	0.150073	-1.45046
00000006_7.tif	control	MT15620	cat2(n4547)	12.474	10.439	5.37507	0.489237	-4.88583	0	0.29777	0.14568	-1.45485
00000006_7.tif	control	MT15620	cat2(n4547)	12.37	10.224	5.37507	0.721601	-4.65347	0	0.29777	0.214871	-1.38566
00000006_7.tif	control	MT15620	cat2(n4547)	12.248	9.72	5.37507	1.21558	-4.15949	0	0.29777	0.361964	-1.23857
00000006_7.tif	control	MT15620	cat2(n4547)	9.967	9.425	5.37507	3.15172	-2.22335	0	0.29777	0.938488	-0.662047
00000006_7.tif	control	MT15620	cat2(n4547)	10.061	9.425	5.37507	3.06744	-2.30763	0	0.29777	0.913393	-0.687142
00000006_7.tif	control	MT15620	cat2(n4547)	10.96	9.53	5.37507	2.23851	-3.13656	0	0.29777	0.666563	-0.933973
00000006_7.tif	control	MT15620	cat2(n4547)	11.474	9.203	5.37507	2.07855	-3.29652	0	0.29777	0.618931	-0.981604
00000006_7.tif	control	MT15620	cat2(n4547)	11.71	9.561	5.37507	1.65304	-3.72203	0	0.29777	0.492226	-1.10831
00000006_7.tif	control	MT15620	cat2(n4547)	12.53	9.564	5.37507	1.26753	-4.10754	0	0.29777	0.377432	-1.2231
00000006_7.tif	control	MT15620	cat2(n4547)	12.818	9.321	5.37507	1.48109	-3.89399	0	0.29777	0.441023	-1.15951
00000006_7.tif	control	MT15620	cat2(n4547)	12.425	9.082	5.37507	1.76083	-3.61424	0	0.29777	0.524323	-1.07621
00000006_7.tif	control	MT15620	cat2(n4547)	12.418	9.012	5.37507	1.83073	-3.54435	0	0.29777	0.545135	-1.0554
00000006_7.tif	control	MT15620	cat2(n4547)	11.679	8.714	5.37507	2.37084	-3.00423	0	0.29777	0.705964	-0.894571
00000006_7.tif	control	MT15620	cat2(n4547)	11.752	8.38	5.37507	2.63981	-2.73526	0	0.29777	0.786056	-0.81448
00000006_7.tif	control	MT15620	cat2(n4547)	9.964	7.908	5.37507	4.05333	-1.32174	0	0.29777	1.20696	-0.393575
00000006_7.tif	control	MT15620	cat2(n4547)	9.411	8.102	5.37507	4.33461	-1.04046	0	0.29777	1.29072	-0.309817
00000006_7.tif	control	MT15620	cat2(n4547)	10.505	8.773	5.37507	3.06481	-2.31026	0	0.29777	0.912608	-0.687927
00000006_7.tif	control	MT15620	cat2(n4547)	11.623	6.793	5.37507	4.17877	-1.1963	0	0.29777	1.24431	-0.356223
00000006_7.tif	control	MT15620	cat2(n4547)	11.891	6.745	5.37507	4.15802	-1.21705	0	0.29777	1.23814	-0.3624
00000006_7.tif	control	MT15620	cat2(n4547)	12.207	6.898	5.37507	3.94908	-1.42599	0	0.29777	1.17592	-0.424617
00000006_7.tif	control	MT15620	cat2(n4547)	13.04	9.106	5.37507	1.71262	-3.66245	0	0.29777	0.509966	-1.09057
00000006_7.tif	control	MT15620	cat2(n4547)	13.276	9.484	5.37507	1.40064	-3.97443	0	0.29777	0.417069	-1.18347
00000006_7.tif	control	MT15620	cat2(n4547)	13.561	8.88	5.37507	2.06644	-3.30863	0	0.29777	0.615323	-0.985212
00000006_7.tif	control	MT15620	cat2(n4547)	13.891	8.679	5.37507	2.38601	-2.98906	0	0.29777	0.710483	-0.890053
00000006_7.tif	control	MT15620	cat2(n4547)	14.012	8.72	5.37507	2.40807	-2.967	0	0.29777	0.717052	-0.883483
00000006_7.tif	control	MT15620	cat2(n4547)	14.137	8.318	5.37507	2.82001	-2.55506	0	0.29777	0.839716	-0.760819
00000006_7.tif	control	MT15620	cat2(n4547)	15.217	7.644	5.37507	3.97557	-1.3995	0	0.29777	1.18381	-0.416728
00000006_7.tif	control	MT15620	cat2(n4547)	15.318	7.616	5.37507	4.05966	-1.31541	0	0.29777	1.20885	-0.39169
00000006_7.tif	control	MT15620	cat2(n4547)	15.561	7.741	5.37507	4.1209	-1.25417	0	0.29777	1.22708	-0.373455
00000006_7.tif	control	MT15620	cat2(n4547)	15.398	8.523	5.37507	3.45443	-1.92065	0	0.29777	1.02862	-0.571911
00000006_7.tif	control	MT15620	cat2(n4547)	15.592	8.623	5.37507	3.54008	-1.835	0	0.29777	1.05413	-0.546407
00000006_7.tif	control	MT15620	cat2(n4547)	15.668	8.786	5.37507	3.50403	-1.87104	0	0.29777	1.04339	-0.557141
00000006_7.tif	control	MT15620	cat2(n4547)	16.12	8.759	5.37507	3.89653	-1.47854	0	0.29777	1.16027	-0.440264
00000006_7.tif	control	MT15620	cat2(n4547)	16.391	8.446	5.37507	4.29321	-1.08186	0	0.29777	1.27839	-0.322146
00000006_7.tif	control	MT15620	cat2(n4547)	15.425	9.55	5.37507	2.90648	-2.46859	0	0.29777	0.865463	-0.735072
00000006_7.tif	control	MT15620	cat2(n4547)	15.561	9.464	5.37507	3.06632	-2.30875	0	0.29777	0.913058	-0.687477
00000006_7.tif	control	MT15620	cat2(n4547)	15.411	9.707	5.37507	2.82947	-2.5456	0	0.29777	0.842532	-0.758004
00000006_7.tif	control	MT15620	cat2(n4547)	15.561	9.655	5.37507	2.98792	-2.38715	0	0.29777	0.889714	-0.710821
00000006_7.tif	control	MT15620	cat2(n4547)	15.738	9.731	5.37507	3.12524	-2.24983	0	0.29777	0.930603	-0.669932
00000006_7.tif	control	MT15620	cat2(n4547)	15.804	9.714	5.37507	3.19308	-2.18199	0	0.29777	0.950803	-0.649732
00000006_7.tif	control	MT15620	cat2(n4547)	15.04	10.148	5.37507	2.3316	-3.04347	0	0.29777	0.694281	-0.906255
00000006_7.tif	control	MT15620	cat2(n4547)	15.13	10.068	5.37507	2.44097	-2.9341	0	0.29777	0.726848	-0.873687
00000006_7.tif	control	MT15620	cat2(n4547)	15.328	10.064	5.37507	2.6316	-2.74347	0	0.29777	0.783612	-0.816924
00000006_7.tif	control	MT15620	cat2(n4547)	13.998	10.436	5.37507	1.25075	-4.12432	0	0.29777	0.372435	-1.2281
00000006_7.tif	control	MT15620	cat2(n4547)	13.901	10.595	5.37507	1.11832	-4.25675	0	0.29777	0.333004	-1.26753
00000006_7.tif	control	MT15620	cat2(n4547)	13.141	10.47	5.37507	0.474494	-4.90058	0	0.29777	0.14129	-1.45924
00000006_7.tif	control	MT15620	cat2(n4547)	13.387	10.776	5.37507	0.585577	-4.78949	0	0.29777	0.174367	-1.42617
00000006_7.tif	control	MT15620	cat2(n4547)	13.137	11.616	5.37507	0.880239	-4.49483	0	0.29777	0.262109	-1.33843
00000006_7.tif	control	MT15620	cat2(n4547)	13.262	11.613	5.37507	0.932374	-4.4427	0	0.29777	0.277633	-1.3229
00000006_7.tif	control	MT15620	cat2(n4547)	13.158	11.957	5.37507	1.20862	-4.16645	0	0.29777	0.359891	-1.24064
00000006_7.tif	control	MT15620	cat2(n4547)	13.453	11.759	5.37507	1.15743	-4.21764	0	0.29777	0.344649	-1.25589
00000006_7.tif	control	MT15620	cat2(n4547)	13.714	11.703	5.37507	1.28201	-4.09306	0	0.29777	0.381744	-1.21879
00000006_7.tif	control	MT15620	cat2(n4547)	13.873	11.849	5.37507	1.49775	-3.87732	0	0.29777	0.445985	-1.15455
00000006_7.tif	control	MT15620	cat2(n4547)	14.078	11.682	5.37507	1.55002	-3.82505	0	0.29777	0.461551	-1.13898
00000006_7.tif	control	MT15620	cat2(n4547)	14.804	11.641	5.37507	2.1707	-3.20437	0	0.29777	0.646368	-0.954167
00000006_7.tif	control	MT15620	cat2(n4547)	15.557	11.575	5.37507	2.86139	-2.51368	0	0.29777	0.852036	-0.748499
00000006_7.tif	control	MT15620	cat2(n4547)	15.682	10.71	5.37507	2.88147	-2.4936	0	0.29777	0.858015	-0.74252
00000006_7.tif	control	MT15620	cat2(n4547)	15.807	10.7	5.37507	3.00673	-2.36834	0	0.29777	0.895314	-0.705221
00000006_7.tif	control	MT15620	cat2(n4547)	14.964	12.512	5.37507	2.75651	-2.61856	0	0.29777	0.820806	-0.779729
00000006_7.tif	control	MT15620	cat2(n4547)	15.158	12.37	5.37507	2.83008	-2.54499	0	0.29777	0.842713	-0.757822
00000006_7.tif	control	MT15620	cat2(n4547)	15.182	13.078	5.37507	3.29311	-2.08196	0	0.29777	0.980589	-0.619946
00000006_7.tif	control	MT15620	cat2(n4547)	15.585	12.898	5.37507	3.48401	-1.89106	0	0.29777	1.03743	-0.563102
00000006_7.tif	control	MT15620	cat2(n4547)	16.655	12.932	5.37507	4.40256	-0.972515	0	0.29777	1.31095	-0.289586
00000006_7.tif	control	MT15620	cat2(n4547)	16.453	12.134	5.37507	3.88639	-1.48868	0	0.29777	1.15725	-0.443285
00000006_7.tif	control	MT15620	cat2(n4547)	13.116	12.505	5.37507	1.73171	-3.64337	0	0.29777	0.51565	-1.08489
00000006_7.tif	control	MT15620	cat2(n4547)	13.165	12.429	5.37507	1.667	-3.70807	0	0.29777	0.496383	-1.10415
00000006_7.tif	control	MT15620	cat2(n4547)	13.498	12.845	5.37507	2.1583	-3.21677	0	0.29777	0.642677	-0.957858
00000006_7.tif	control	MT15620	cat2(n4547)	13.568	12.877	5.37507	2.21187	-3.1632	0	0.29777	0.658629	-0.941906
00000006_7.tif	control	MT15620	cat2(n4547)	14.207	12.849	5.37507	2.48279	-2.89228	0	0.29777	0.7393	-0.861235
00000006_7.tif	control	MT15620	cat2(n4547)	14.234	12.731	5.37507	2.40243	-2.97264	0	0.29777	0.715371	-0.885164
00000006_7.tif	control	MT15620	cat2(n4547)	14.137	13.141	5.37507	2.69317	-2.68191	0	0.29777	0.801944	-0.798591
00000006_7.tif	control	MT15620	cat2(n4547)	14.377	13.13	5.37507	2.81073	-2.56434	0	0.29777	0.836951	-0.763584
00000006_7.tif	control	MT15620	cat2(n4547)	14.21	13.363	5.37507	2.92253	-2.45254	0	0.29777	0.870242	-0.730293
00000006_7.tif	control	MT15620	cat2(n4547)	14.686	13.019	5.37507	2.90939	-2.46568	0	0.29777	0.866329	-0.734206
00000006_7.tif	control	MT15620	cat2(n4547)	14.484	14.009	5.37507	3.62132	-1.75375	0	0.29777	1.07832	-0.522214
00000006_7.tif	control	MT15620	cat2(n4547)	17.953	11.259	5.37507	5.17123	-0.203839	0	0.29777	1.53984	-0.0606971
00000006_7.tif	control	MT15620	cat2(n4547)	17.155	11.05	5.37507	4.36006	-1.01501	0	0.29777	1.29829	-0.30224
00000006_7.tif	control	MT15620	cat2(n4547)	16.752	11.047	5.37507	3.95759	-1.41748	0	0.29777	1.17845	-0.422083
0000007_13.tif	control	N2	wt	11.859	15.974	5.70334	6.21457	0.511234	1	0.29777	1.85051	0.15223
0000007_13.tif	control	N2	wt	11.729	15.901	5.70334	6.25091	0.547572	1	0.29777	1.86133	0.163051
0000007_13.tif	control	N2	wt	10.896	12.646	5.70334	5.32713	-0.376207	0	0.29777	1.58626	-0.112023
0000007_13.tif	control	N2	wt	11.078	12.302	5.70334	5.07877	-0.624572	0	0.29777	1.5123	-0.185979
0000007_13.tif	control	N2	wt	10.891	11.672	5.70334	5.19356	-0.509778	0	0.29777	1.54649	-0.151796
0000007_13.tif	control	N2	wt	12.01	12.969	5.70334	4.35614	-1.3472	0	0.29777	1.29713	-0.401155
0000007_13.tif	control	N2	wt	12.49	12.406	5.70334	3.72341	-1.97993	0	0.29777	1.10872	-0.589564
0000007_13.tif	control	N2	wt	12.37	12.26	5.70334	3.80395	-1.89939	0	0.29777	1.1327	-0.56558
0000007_13.tif	control	N2	wt	12.583	12.224	5.70334	3.58831	-2.11503	0	0.29777	1.06849	-0.629791
0000007_13.tif	control	N2	wt	12.922	13.385	5.70334	3.7225	-1.98084	0	0.29777	1.10845	-0.589835
0000007_13.tif	control	N2	wt	12.979	13.312	5.70334	3.6356	-2.06774	0	0.29777	1.08257	-0.61571
0000007_13.tif	control	N2	wt	13.609	13.542	5.70334	3.26146	-2.44188	0	0.29777	0.971165	-0.727119
0000007_13.tif	control	N2	wt	13.943	13.693	5.70334	3.12502	-2.57832	0	0.29777	0.930537	-0.767746
0000007_13.tif	control	N2	wt	14.229	13.484	5.70334	2.77779	-2.92555	0	0.29777	0.827143	-0.87114
0000007_13.tif	control	N2	wt	14.385	13.38	5.70334	2.59677	-3.10657	0	0.29777	0.77324	-0.925044
0000007_13.tif	control	N2	wt	14.21	13.033	5.70334	2.47393	-3.22941	0	0.29777	0.736661	-0.961623
0000007_13.tif	control	N2	wt	13.74	12.891	5.70334	2.76706	-2.93628	0	0.29777	0.823949	-0.874335
0000007_13.tif	control	N2	wt	13.349	12.349	5.70334	2.8857	-2.81764	0	0.29777	0.859276	-0.839008
0000007_13.tif	control	N2	wt	13.458	11.974	5.70334	2.67981	-3.02353	0	0.29777	0.797966	-0.900317
0000007_13.tif	control	N2	wt	13.49	11.833	5.70334	2.62218	-3.08116	0	0.29777	0.780807	-0.917477
0000007_13.tif	control	N2	wt	14.089	12.552	5.70334	2.29303	-3.41031	0	0.29777	0.682797	-1.01549
0000007_13.tif	control	N2	wt	14.224	12.589	5.70334	2.19659	-3.50675	0	0.29777	0.654078	-1.04421
0000007_13.tif	control	N2	wt	14.292	12.432	5.70334	2.05724	-3.6461	0	0.29777	0.612584	-1.0857
0000007_13.tif	control	N2	wt	14.25	12.302	5.70334	2.03358	-3.66976	0	0.29777	0.60554	-1.09274
0000007_13.tif	control	N2	wt	14.562	12.594	5.70334	1.92295	-3.78039	0	0.29777	0.572597	-1.12569
0000007_13.tif	control	N2	wt	14.677	12.583	5.70334	1.82658	-3.87676	0	0.29777	0.5439	-1.15438
0000007_13.tif	control	N2	wt	14.641	12.667	5.70334	1.90853	-3.79481	0	0.29777	0.568304	-1.12998
0000007_13.tif	control	N2	wt	12.219	11.234	5.70334	3.86306	-1.84028	0	0.29777	1.1503	-0.547981
0000007_13.tif	control	N2	wt	12.141	10.974	5.70334	3.96118	-1.74216	0	0.29777	1.17952	-0.518763
0000007_13.tif	control	N2	wt	12.083	10.844	5.70334	4.03504	-1.6683	0	0.29777	1.20151	-0.496771
0000007_13.tif	control	N2	wt	12.724	11.411	5.70334	3.354	-2.34934	0	0.29777	0.998721	-0.699563
0000007_13.tif	control	N2	wt	12.859	11.021	5.70334	3.24254	-2.4608	0	0.29777	0.965531	-0.732753
0000007_13.tif	control	N2	wt	12.922	10.969	5.70334	3.1868	-2.51654	0	0.29777	0.948934	-0.74935
0000007_13.tif	control	N2	wt	12.99	10.589	5.70334	3.19553	-2.50781	0	0.29777	0.951534	-0.74675
0000007_13.tif	control	N2	wt	12.906	10.505	5.70334	3.29885	-2.40449	0	0.29777	0.982299	-0.715985
0000007_13.tif	control	N2	wt	12.094	9.484	5.70334	4.42556	-1.27778	0	0.29777	1.3178	-0.380484
0000007_13.tif	control	N2	wt	13.135	10.312	5.70334	3.1415	-2.56184	0	0.29777	0.935446	-0.762838
0000007_13.tif	control	N2	wt	13.266	10.057	5.70334	3.121	-2.58234	0	0.29777	0.929341	-0.768942
0000007_13.tif	control	N2	wt	13.255	9.833	5.70334	3.2341	-2.46924	0	0.29777	0.963018	-0.735265
0000007_13.tif	control	N2	wt	12.932	9.427	5.70334	3.71935	-1.98399	0	0.29777	1.10751	-0.590772
0000007_13.tif	control	N2	wt	13.63	9.557	5.70334	3.07083	-2.63251	0	0.29777	0.914402	-0.783881
0000007_13.tif	control	N2	wt	13.943	10.073	5.70334	2.51962	-3.18372	0	0.29777	0.750266	-0.948017
0000007_13.tif	control	N2	wt	14.615	10.495	5.70334	1.7261	-3.97724	0	0.29777	0.513981	-1.1843
0000007_13.tif	control	N2	wt	14.536	9.5	5.70334	2.45554	-3.2478	0	0.29777	0.731187	-0.967097
0000007_13.tif	control	N2	wt	14.557	9.443	5.70334	2.48726	-3.21608	0	0.29777	0.740632	-0.957652
0000007_13.tif	control	N2	wt	14.193	9.172	5.70334	2.92683	-2.77651	0	0.29777	0.871523	-0.826761
0000007_13.tif	control	N2	wt	14.396	8.25	5.70334	3.58065	-2.12269	0	0.29777	1.06621	-0.632074
0000007_13.tif	control	N2	wt	14.438	8.151	5.70334	3.64927	-2.05407	0	0.29777	1.08664	-0.611639
0000007_13.tif	control	N2	wt	14.635	8.448	5.70334	3.2957	-2.40764	0	0.29777	0.98136	-0.716924
0000007_13.tif	control	N2	wt	14.214	7.625	5.70334	4.21999	-1.48335	0	0.29777	1.25659	-0.441698
0000007_13.tif	control	N2	wt	13.469	6.927	5.70334	5.18779	-0.515553	0	0.29777	1.54477	-0.153516
0000007_13.tif	control	N2	wt	13.271	6.927	5.70334	5.29013	-0.413207	0	0.29777	1.57524	-0.123041
0000007_13.tif	control	N2	wt	12.099	4.161	5.70334	8.27012	2.56678	1	0.29777	2.46259	0.764311
0000007_13.tif	control	N2	wt	14.97	8.234	5.70334	3.36467	-2.33867	0	0.29777	1.0019	-0.696386
0000007_13.tif	control	N2	wt	15.273	8.28	5.70334	3.23283	-2.47051	0	0.29777	0.96264	-0.735644
0000007_13.tif	control	N2	wt	15.231	8.866	5.70334	2.68224	-3.0211	0	0.29777	0.798692	-0.899592
0000007_13.tif	control	N2	wt	15.432	8.891	5.70334	2.60148	-3.10186	0	0.29777	0.774644	-0.92364
0000007_13.tif	control	N2	wt	15.62	8.717	5.70334	2.73265	-2.97069	0	0.29777	0.813702	-0.884581
0000007_13.tif	control	N2	wt	15.845	8.714	5.70334	2.70705	-2.99629	0	0.29777	0.806077	-0.892206
0000007_13.tif	control	N2	wt	15.734	8.894	5.70334	2.5404	-3.16294	0	0.29777	0.756454	-0.941829
0000007_13.tif	control	N2	wt	15.925	9.064	5.70334	2.35198	-3.35136	0	0.29777	0.70035	-0.997934
0000007_13.tif	control	N2	wt	16.03	8.457	5.70334	2.95439	-2.74895	0	0.29777	0.879729	-0.818555
0000007_13.tif	control	N2	wt	15.898	9.401	5.70334	2.01804	-3.6853	0	0.29777	0.600913	-1.09737
0000007_13.tif	control	N2	wt	16.085	9.696	5.70334	1.71501	-3.98833	0	0.29777	0.51068	-1.1876
0000007_13.tif	control	N2	wt	16.196	9.675	5.70334	1.74001	-3.96333	0	0.29777	0.518122	-1.18016
0000007_13.tif	control	N2	wt	15.564	9.693	5.70334	1.79324	-3.9101	0	0.29777	0.533974	-1.16431
0000007_13.tif	control	N2	wt	15.491	9.891	5.70334	1.62941	-4.07393	0	0.29777	0.485189	-1.21309
0000007_13.tif	control	N2	wt	14.783	9.759	5.70334	2.09908	-3.60426	0	0.29777	0.625042	-1.07324
0000007_13.tif	control	N2	wt	14.87	9.87	5.70334	1.95805	-3.74529	0	0.29777	0.583047	-1.11524
0000007_13.tif	control	N2	wt	15.648	10.394	5.70334	1.10417	-4.59917	0	0.29777	0.328788	-1.3695
0000007_13.tif	control	N2	wt	15.45	10.533	5.70334	1.07948	-4.62386	0	0.29777	0.321436	-1.37685
0000007_13.tif	control	N2	wt	16.023	10.724	5.70334	0.689198	-5.01414	0	0.29777	0.205223	-1.49306
0000007_13.tif	control	N2	wt	15.158	11.293	5.70334	0.927537	-4.7758	0	0.29777	0.276193	-1.42209
0000007_13.tif	control	N2	wt	16.036	11.432	5.70334	0.0469574	-5.65638	0	0.29777	0.0139825	-1.6843
0000007_13.tif	control	N2	wt	16.214	11.068	5.70334	0.368978	-5.33436	0	0.29777	0.109871	-1.58841
0000007_13.tif	control	N2	wt	16.498	11.144	5.70334	0.497684	-5.20566	0	0.29777	0.148195	-1.55009
0000007_13.tif	control	N2	wt	16.547	10.356	5.70334	1.15455	-4.54879	0	0.29777	0.34379	-1.35449
0000007_13.tif	control	N2	wt	16.345	11.766	5.70334	0.4442	-5.25914	0	0.29777	0.13227	-1.56601
0000007_13.tif	control	N2	wt	16.453	11.78	5.70334	0.526105	-5.17724	0	0.29777	0.156658	-1.54163
0000007_13.tif	control	N2	wt	16.47	11.967	5.70334	0.680294	-5.02305	0	0.29777	0.202571	-1.49571
0000007_13.tif	control	N2	wt	14.793	11.96	5.70334	1.39736	-4.30598	0	0.29777	0.416093	-1.28219
0000007_13.tif	control	N2	wt	14.877	12.241	5.70334	1.4599	-4.24344	0	0.29777	0.434714	-1.26357
0000007_13.tif	control	N2	wt	15.595	11.939	5.70334	0.715593	-4.98775	0	0.29777	0.213082	-1.4852
0000007_13.tif	control	N2	wt	15.648	11.908	5.70334	0.657198	-5.04614	0	0.29777	0.195694	-1.50259
0000007_13.tif	control	N2	wt	15.773	11.891	5.70334	0.568705	-5.13464	0	0.29777	0.169343	-1.52894
0000007_13.tif	control	N2	wt	15.075	12.561	5.70334	1.52595	-4.17739	0	0.29777	0.454381	-1.2439
0000007_13.tif	control	N2	wt	15.484	12.637	5.70334	1.36232	-4.34102	0	0.29777	0.405658	-1.29263
0000007_13.tif	control	N2	wt	15.502	12.804	5.70334	1.50739	-4.19595	0	0.29777	0.448856	-1.24943
0000007_13.tif	control	N2	wt	16.071	12.939	5.70334	1.52802	-4.17532	0	0.29777	0.454997	-1.24329
0000007_13.tif	control	N2	wt	16.55	13.036	5.70334	1.69216	-4.01118	0	0.29777	0.503875	-1.19441
0000007_13.tif	control	N2	wt	16.082	13.491	5.70334	2.08	-3.62334	0	0.29777	0.619363	-1.07892
0000007_13.tif	control	N2	wt	16.109	13.599	5.70334	2.18822	-3.51512	0	0.29777	0.651586	-1.0467
0000007_13.tif	control	N2	wt	15.245	15.981	5.70334	4.6453	-1.05804	0	0.29777	1.38323	-0.315053
0000007_13.tif	control	N2	wt	15.356	15.929	5.70334	4.57533	-1.12801	0	0.29777	1.36239	-0.335889
0000007_13.tif	control	N2	wt	15.606	15.505	5.70334	4.12112	-1.58222	0	0.29777	1.22715	-0.471138
0000007_13.tif	control	N2	wt	16.283	16.043	5.70334	4.63653	-1.06681	0	0.29777	1.38062	-0.317663
0000007_13.tif	control	N2	wt	18.068	18.082	5.70334	6.96149	1.25815	1	0.29777	2.07292	0.374639
0000007_13.tif	control	N2	wt	17.766	17.422	5.70334	6.24351	0.540174	1	0.29777	1.85913	0.160848
0000007_13.tif	control	N2	wt	17.655	17.276	5.70334	6.07331	0.369975	1	0.29777	1.80845	0.110167
0000007_13.tif	control	N2	wt	17.55	16.856	5.70334	5.64046	-0.0628782	0	0.29777	1.67956	-0.0187233
0000007_13.tif	control	N2	wt	18.464	17.186	5.70334	6.24849	0.545149	1	0.29777	1.86061	0.162329
0000007_13.tif	control	N2	wt	18.477	17.085	5.70334	6.16031	0.456975	1	0.29777	1.83436	0.136073
0000007_13.tif	control	N2	wt	18.679	17.182	5.70334	6.33006	0.626719	1	0.29777	1.8849	0.186618
0000007_13.tif	control	N2	wt	19.172	18.009	5.70334	7.28742	1.58408	1	0.29777	2.16997	0.47169
0000007_13.tif	control	N2	wt	18.793	15.297	5.70334	4.74049	-0.962853	0	0.29777	1.41157	-0.286709
0000007_13.tif	control	N2	wt	18.783	15.179	5.70334	4.63841	-1.06493	0	0.29777	1.38118	-0.317104
0000007_13.tif	control	N2	wt	17.686	15.075	5.70334	4.00132	-1.70202	0	0.29777	1.19147	-0.506811
0000007_13.tif	control	N2	wt	17.234	14.811	5.70334	3.59115	-2.11219	0	0.29777	1.06934	-0.628948
0000007_13.tif	control	N2	wt	17.286	14.686	5.70334	3.49069	-2.21265	0	0.29777	1.03942	-0.658862
0000007_13.tif	control	N2	wt	17.599	14.526	5.70334	3.46651	-2.23683	0	0.29777	1.03222	-0.666062
0000007_13.tif	control	N2	wt	17.505	14.457	5.70334	3.3637	-2.33964	0	0.29777	1.00161	-0.696676
0000007_13.tif	control	N2	wt	16.804	13.891	5.70334	2.58408	-3.11926	0	0.29777	0.769462	-0.928822
0000007_13.tif	control	N2	wt	17.036	13.842	5.70334	2.61295	-3.09039	0	0.29777	0.778059	-0.920224
0000007_13.tif	control	N2	wt	17.109	13.839	5.70334	2.63783	-3.06551	0	0.29777	0.785467	-0.912817
0000007_13.tif	control	N2	wt	17.175	13.856	5.70334	2.67982	-3.02352	0	0.29777	0.79797	-0.900314
0000007_13.tif	control	N2	wt	17.106	13.665	5.70334	2.47736	-3.22598	0	0.29777	0.737683	-0.960601
0000007_13.tif	control	N2	wt	17.165	13.651	5.70334	2.48981	-3.21353	0	0.29777	0.741392	-0.956892
0000007_13.tif	control	N2	wt	17.286	13.748	5.70334	2.63075	-3.07259	0	0.29777	0.783358	-0.914926
0000007_13.tif	control	N2	wt	16.828	13.273	5.70334	2.00737	-3.69597	0	0.29777	0.597735	-1.10055
0000007_13.tif	control	N2	wt	16.818	13.2	5.70334	1.93601	-3.76733	0	0.29777	0.576485	-1.1218
0000007_13.tif	control	N2	wt	17.165	13.318	5.70334	2.19504	-3.5083	0	0.29777	0.653618	-1.04467
0000007_13.tif	control	N2	wt	17.21	13.401	5.70334	2.28944	-3.4139	0	0.29777	0.681726	-1.01656
0000007_13.tif	control	N2	wt	17.436	13.613	5.70334	2.58708	-3.11626	0	0.29777	0.770354	-0.92793
0000007_13.tif	control	N2	wt	17.578	12.932	5.70334	2.13622	-3.56712	0	0.29777	0.636103	-1.06218
0000007_13.tif	control	N2	wt	18.089	12.964	5.70334	2.54085	-3.16249	0	0.29777	0.75659	-0.941694
0000007_13.tif	control	N2	wt	20.026	13.214	5.70334	4.34022	-1.36312	0	0.29777	1.29239	-0.405896
0000007_13.tif	control	N2	wt	19.839	13.075	5.70334	4.11267	-1.59067	0	0.29777	1.22463	-0.473655
0000007_13.tif	control	N2	wt	18.106	12.616	5.70334	2.35898	-3.34436	0	0.29777	0.702435	-0.995849
0000007_13.tif	control	N2	wt	16.887	12.693	5.70334	1.51592	-4.18742	0	0.29777	0.451395	-1.24689
0000007_13.tif	control	N2	wt	16.738	12.571	5.70334	1.33462	-4.36872	0	0.29777	0.397409	-1.30087
0000007_13.tif	control	N2	wt	17.321	12.533	5.70334	1.67449	-4.02885	0	0.29777	0.498614	-1.19967
0000007_13.tif	control	N2	wt	17.373	12.498	5.70334	1.69074	-4.0126	0	0.29777	0.503451	-1.19483
0000007_13.tif	control	N2	wt	16.766	11.7	5.70334	0.746234	-4.95711	0	0.29777	0.222206	-1.47608
0000007_13.tif	control	N2	wt	17.776	12.016	5.70334	1.80256	-3.90078	0	0.29777	0.536749	-1.16153
0000007_13.tif	control	N2	wt	18.033	11.859	5.70334	2.00567	-3.69767	0	0.29777	0.59723	-1.10105
0000007_13.tif	control	N2	wt	19.481	12.033	5.70334	3.45938	-2.24396	0	0.29777	1.0301	-0.668185
0000007_13.tif	control	N2	wt	20.405	12.707	5.70334	4.51692	-1.18642	0	0.29777	1.345	-0.353281
0000007_13.tif	control	N2	wt	20.349	11.731	5.70334	4.28297	-1.42037	0	0.29777	1.27534	-0.422943
0000007_13.tif	control	N2	wt	18.359	11.366	5.70334	2.28144	-3.4219	0	0.29777	0.679346	-1.01894
0000007_13.tif	control	N2	wt	18.769	11.22	5.70334	2.69777	-3.00557	0	0.29777	0.803315	-0.894969
0000007_13.tif	control	N2	wt	17.325	10.207	5.70334	1.73339	-3.96995	0	0.29777	0.51615	-1.18213
0000007_13.tif	control	N2	wt	16.887	9.932	5.70334	1.6858	-4.01754	0	0.29777	0.501981	-1.1963
0000007_13.tif	control	N2	wt	17.009	9.932	5.70334	1.74763	-3.95571	0	0.29777	0.520391	-1.17789
0000007_13.tif	control	N2	wt	17.102	9.693	5.70334	2.00002	-3.70332	0	0.29777	0.595547	-1.10274
0000007_13.tif	control	N2	wt	17.335	9.568	5.70334	2.23085	-3.47249	0	0.29777	0.664281	-1.034
0000007_13.tif	control	N2	wt	17.436	9.641	5.70334	2.23093	-3.47241	0	0.29777	0.664305	-1.03398
0000007_13.tif	control	N2	wt	17.474	9.536	5.70334	2.33761	-3.36573	0	0.29777	0.696071	-1.00221
0000007_13.tif	control	N2	wt	17.55	9.498	5.70334	2.41378	-3.28956	0	0.29777	0.718752	-0.979531
0000007_13.tif	control	N2	wt	16.995	9.03	5.70334	2.55148	-3.15186	0	0.29777	0.759754	-0.938529
0000007_13.tif	control	N2	wt	17.595	9.13	5.70334	2.73939	-2.96395	0	0.29777	0.815708	-0.882576
0000007_13.tif	control	N2	wt	18.078	9.411	5.70334	2.82843	-2.87491	0	0.29777	0.842221	-0.856063
0000007_13.tif	control	N2	wt	18.165	9.45	5.70334	2.86375	-2.83959	0	0.29777	0.85274	-0.845543
0000007_13.tif	control	N2	wt	17.759	9.908	5.70334	2.25494	-3.4484	0	0.29777	0.671455	-1.02683
0000007_13.tif	control	N2	wt	17.97	10.231	5.70334	2.22981	-3.47353	0	0.29777	0.663971	-1.03431
0000007_13.tif	control	N2	wt	18.026	10.262	5.70334	2.26162	-3.44172	0	0.29777	0.673441	-1.02484
0000007_13.tif	control	N2	wt	19.224	10.668	5.70334	3.23255	-2.47079	0	0.29777	0.962556	-0.735728
0000007_13.tif	control	N2	wt	19.335	10.78	5.70334	3.31756	-2.38578	0	0.29777	0.98787	-0.710413
0000007_13.tif	control	N2	wt	19.571	10.984	5.70334	3.519	-2.18434	0	0.29777	1.04785	-0.65043
0000007_13.tif	control	N2	wt	19.477	10.186	5.70334	3.61301	-2.09033	0	0.29777	1.07585	-0.622438
0000007_13.tif	control	N2	wt	19.786	9.842	5.70334	4.02629	-1.67705	0	0.29777	1.19891	-0.499375
0000007_13.tif	control	N2	wt	20.047	10.79	5.70334	4.01729	-1.68605	0	0.29777	1.19623	-0.502056
0000007_13.tif	control	N2	wt	20.085	10.877	5.70334	4.04243	-1.66091	0	0.29777	1.20371	-0.49457
0000007_13.tif	control	N2	wt	20.62	11.071	5.70334	4.55471	-1.14863	0	0.29777	1.35626	-0.342028
0000007_13.tif	control	N2	wt	20.908	10.696	5.70334	4.88264	-0.820705	0	0.29777	1.4539	-0.244381
0000007_13.tif	control	N2	wt	20.144	9.047	5.70334	4.70328	-1.00006	0	0.29777	1.4005	-0.297788
0000007_13.tif	control	N2	wt	19.401	8.936	5.70334	4.14342	-1.55992	0	0.29777	1.23379	-0.464496
0000007_13.tif	control	N2	wt	19.286	8.835	5.70334	4.11425	-1.58909	0	0.29777	1.2251	-0.473184
0000007_13.tif	control	N2	wt	16.62	8.602	5.70334	2.86081	-2.84253	0	0.29777	0.851864	-0.84642
0000007_13.tif	control	N2	wt	16.578	8.498	5.70334	2.9556	-2.74774	0	0.29777	0.880089	-0.818195
0000007_13.tif	control	N2	wt	16.599	8.391	5.70334	3.06461	-2.63873	0	0.29777	0.912549	-0.785734
0000007_13.tif	control	N2	wt	16.54	8.307	5.70334	3.13819	-2.56515	0	0.29777	0.93446	-0.763824
0000007_13.tif	control	N2	wt	17.55	8.613	5.70334	3.16158	-2.54176	0	0.29777	0.941424	-0.75686
0000007_13.tif	control	N2	wt	16.957	8.116	5.70334	3.41023	-2.29311	0	0.29777	1.01546	-0.682819
0000007_13.tif	control	N2	wt	17.217	8.106	5.70334	3.49576	-2.20758	0	0.29777	1.04093	-0.657351
0000007_13.tif	control	N2	wt	17.21	7.95	5.70334	3.64142	-2.06192	0	0.29777	1.08431	-0.613978
0000007_13.tif	control	N2	wt	17.196	7.835	5.70334	3.74669	-1.95665	0	0.29777	1.11565	-0.582631
0000007_13.tif	control	N2	wt	18.217	8.023	5.70334	4.00673	-1.69661	0	0.29777	1.19308	-0.5052
0000007_13.tif	control	N2	wt	17.915	7.776	5.70334	4.07281	-1.63053	0	0.29777	1.21276	-0.485522
0000007_13.tif	control	N2	wt	18.637	7.425	5.70334	4.73674	-0.966603	0	0.29777	1.41046	-0.287825
0000007_13.tif	control	N2	wt	19.043	7.273	5.70334	5.09061	-0.612734	0	0.29777	1.51583	-0.182454
0000008_10.tif	predator	MT15620	cat2(n4547)	5.464	9.231	5.58875	9.14339	3.55464	1	0.29777	2.72263	1.05846
0000008_10.tif	predator	MT15620	cat2(n4547)	5.432	9.321	5.58875	9.15283	3.56407	1	0.29777	2.72544	1.06127
0000008_10.tif	predator	MT15620	cat2(n4547)	5.401	9.863	5.58875	9.0712	3.48245	1	0.29777	2.70113	1.03697
0000008_10.tif	predator	MT15620	cat2(n4547)	10.717	14.363	5.58875	4.62446	-0.964292	0	0.29777	1.37703	-0.287137
0000008_10.tif	predator	MT15620	cat2(n4547)	11.009	13.589	5.58875	3.9356	-1.65315	0	0.29777	1.17191	-0.492258
0000008_10.tif	predator	MT15620	cat2(n4547)	11.04	13.408	5.58875	3.81462	-1.77414	0	0.29777	1.13588	-0.528285
0000008_10.tif	predator	MT15620	cat2(n4547)	10.352	12.943	5.58875	4.2387	-1.35006	0	0.29777	1.26216	-0.402007
0000008_10.tif	predator	MT15620	cat2(n4547)	10.137	12.634	5.58875	4.34857	-1.24018	0	0.29777	1.29487	-0.369289
0000008_10.tif	predator	MT15620	cat2(n4547)	10.589	10.96	5.58875	3.77416	-1.81459	0	0.29777	1.12383	-0.54033
0000008_10.tif	predator	MT15620	cat2(n4547)	10.363	8.738	5.58875	4.81736	-0.771397	0	0.29777	1.43446	-0.229699
0000008_10.tif	predator	MT15620	cat2(n4547)	10.679	7.45	5.58875	5.43211	-0.156647	0	0.29777	1.61752	-0.0466447
0000008_10.tif	predator	MT15620	cat2(n4547)	10.943	7.804	5.58875	4.99271	-0.596046	0	0.29777	1.48668	-0.177484
0000008_10.tif	predator	MT15620	cat2(n4547)	10.953	7.488	5.58875	5.22291	-0.36584	0	0.29777	1.55523	-0.108936
0000008_10.tif	predator	MT15620	cat2(n4547)	10.977	7.245	5.58875	5.39571	-0.193047	0	0.29777	1.60668	-0.0574836
0000008_10.tif	predator	MT15620	cat2(n4547)	12.977	6.307	5.58875	5.3407	-0.248052	0	0.29777	1.5903	-0.0738623
0000008_10.tif	predator	MT15620	cat2(n4547)	13.807	7.099	5.58875	4.40591	-1.18284	0	0.29777	1.31195	-0.352214
0000008_10.tif	predator	MT15620	cat2(n4547)	14.401	7.915	5.58875	3.55975	-2.029	0	0.29777	1.05999	-0.604177
0000008_10.tif	predator	MT15620	cat2(n4547)	13.339	8.363	5.58875	3.26442	-2.32433	0	0.29777	0.972047	-0.692116
0000008_10.tif	predator	MT15620	cat2(n4547)	13.123	8.502	5.58875	3.20699	-2.38176	0	0.29777	0.954947	-0.709216
0000008_10.tif	predator	MT15620	cat2(n4547)	13.839	8.432	5.58875	3.08105	-2.5077	0	0.29777	0.917445	-0.746718
0000008_10.tif	predator	MT15620	cat2(n4547)	13.641	8.724	5.58875	2.83451	-2.75424	0	0.29777	0.844033	-0.82013
0000008_10.tif	predator	MT15620	cat2(n4547)	13.585	8.915	5.58875	2.66468	-2.92407	0	0.29777	0.793462	-0.870701
0000008_10.tif	predator	MT15620	cat2(n4547)	13.842	8.898	5.58875	2.62144	-2.96731	0	0.29777	0.780588	-0.883575
0000008_10.tif	predator	MT15620	cat2(n4547)	12.335	9.227	5.58875	3.00351	-2.58525	0	0.29777	0.894354	-0.769808
0000008_10.tif	predator	MT15620	cat2(n4547)	12.127	9.467	5.58875	2.97867	-2.61009	0	0.29777	0.886957	-0.777206
0000008_10.tif	predator	MT15620	cat2(n4547)	12.009	9.665	5.58875	2.94113	-2.64762	0	0.29777	0.87578	-0.788383
0000008_10.tif	predator	MT15620	cat2(n4547)	13.915	10.12	5.58875	1.41559	-4.17317	0	0.29777	0.421519	-1.24264
0000008_10.tif	predator	MT15620	cat2(n4547)	14.016	10.901	5.58875	0.652436	-4.93632	0	0.29777	0.194276	-1.46989
0000008_10.tif	predator	MT15620	cat2(n4547)	13.318	11.193	5.58875	1.04836	-4.54039	0	0.29777	0.31217	-1.35199
0000008_10.tif	predator	MT15620	cat2(n4547)	13.339	11.425	5.58875	0.990213	-4.59854	0	0.29777	0.294856	-1.36931
0000008_10.tif	predator	MT15620	cat2(n4547)	13.373	11.349	5.58875	0.963146	-4.62561	0	0.29777	0.286796	-1.37737
0000008_10.tif	predator	MT15620	cat2(n4547)	13.665	11.408	5.58875	0.666277	-4.92248	0	0.29777	0.198397	-1.46577
0000008_10.tif	predator	MT15620	cat2(n4547)	13.991	11.925	5.58875	0.563001	-5.02575	0	0.29777	0.167645	-1.49652
0000008_10.tif	predator	MT15620	cat2(n4547)	13.894	12.332	5.58875	0.96152	-4.62723	0	0.29777	0.286312	-1.37785
0000008_10.tif	predator	MT15620	cat2(n4547)	14.644	11.905	5.58875	0.534431	-5.05432	0	0.29777	0.159138	-1.50503
0000008_10.tif	predator	MT15620	cat2(n4547)	14.599	11.752	5.58875	0.388233	-5.20052	0	0.29777	0.115604	-1.54856
0000008_10.tif	predator	MT15620	cat2(n4547)	14.543	11.446	5.58875	0.216816	-5.37194	0	0.29777	0.0645612	-1.5996
0000008_10.tif	predator	MT15620	cat2(n4547)	13.092	12.877	5.58875	1.86979	-3.71897	0	0.29777	0.556767	-1.1074
0000008_10.tif	predator	MT15620	cat2(n4547)	13.155	12.703	5.58875	1.69893	-3.88982	0	0.29777	0.505891	-1.15827
0000008_10.tif	predator	MT15620	cat2(n4547)	13.88	12.776	5.58875	1.37692	-4.21183	0	0.29777	0.410005	-1.25416
0000008_10.tif	predator	MT15620	cat2(n4547)	13.967	12.661	5.58875	1.24068	-4.34807	0	0.29777	0.369438	-1.29473
0000008_10.tif	predator	MT15620	cat2(n4547)	14.12	12.651	5.58875	1.19524	-4.39352	0	0.29777	0.355906	-1.30826
0000008_10.tif	predator	MT15620	cat2(n4547)	14.248	12.495	5.58875	1.02413	-4.56462	0	0.29777	0.304955	-1.35921
0000008_10.tif	predator	MT15620	cat2(n4547)	14.085	13.158	5.58875	1.70144	-3.88731	0	0.29777	0.506638	-1.15752
0000008_10.tif	predator	MT15620	cat2(n4547)	14.161	12.939	5.58875	1.47449	-4.11427	0	0.29777	0.439058	-1.2251
0000008_10.tif	predator	MT15620	cat2(n4547)	14.269	13.026	5.58875	1.55312	-4.03563	0	0.29777	0.462473	-1.20169
0000008_10.tif	predator	MT15620	cat2(n4547)	14.241	13.127	5.58875	1.65529	-3.93346	0	0.29777	0.492895	-1.17127
0000008_10.tif	predator	MT15620	cat2(n4547)	13.05	13.724	5.58875	2.58762	-3.00113	0	0.29777	0.770516	-0.893647
0000008_10.tif	predator	MT15620	cat2(n4547)	14.575	14.259	5.58875	2.79593	-2.79282	0	0.29777	0.832545	-0.831618
0000008_10.tif	predator	MT15620	cat2(n4547)	13.62	15.04	5.58875	3.6356	-1.95315	0	0.29777	1.08257	-0.581589
0000008_10.tif	predator	MT15620	cat2(n4547)	14.29	15.082	5.58875	3.6082	-1.98055	0	0.29777	1.07441	-0.589749
0000008_10.tif	predator	MT15620	cat2(n4547)	14.318	15.144	5.58875	3.67001	-1.91874	0	0.29777	1.09282	-0.571343
0000008_10.tif	predator	MT15620	cat2(n4547)	14.498	15.533	5.58875	4.06256	-1.52619	0	0.29777	1.20971	-0.454455
0000008_10.tif	predator	MT15620	cat2(n4547)	14.564	15.769	5.58875	4.30148	-1.28727	0	0.29777	1.28085	-0.383312
0000008_10.tif	predator	MT15620	cat2(n4547)	13.151	16.595	5.58875	5.25452	-0.334234	0	0.29777	1.56464	-0.0995248
0000008_10.tif	predator	MT15620	cat2(n4547)	13.325	16.568	5.58875	5.19181	-0.396947	0	0.29777	1.54596	-0.118199
0000008_10.tif	predator	MT15620	cat2(n4547)	13.738	16.814	5.58875	5.37249	-0.216258	0	0.29777	1.59977	-0.0643951
0000008_10.tif	predator	MT15620	cat2(n4547)	14.095	16.839	5.58875	5.37006	-0.218696	0	0.29777	1.59904	-0.065121
0000008_10.tif	predator	MT15620	cat2(n4547)	16.793	20.436	5.58875	9.29482	3.70607	1	0.29777	2.76772	1.10356
0000008_10.tif	predator	MT15620	cat2(n4547)	15.429	15.405	5.58875	4.08227	-1.50648	0	0.29777	1.21558	-0.448584
0000008_10.tif	predator	MT15620	cat2(n4547)	15.339	14.623	5.58875	3.30731	-2.28144	0	0.29777	0.984819	-0.679344
0000008_10.tif	predator	MT15620	cat2(n4547)	15.415	14.686	5.58875	3.39095	-2.19781	0	0.29777	1.00972	-0.654441
0000008_10.tif	predator	MT15620	cat2(n4547)	17.155	14.62	5.58875	4.22957	-1.35918	0	0.29777	1.25944	-0.404724
0000008_10.tif	predator	MT15620	cat2(n4547)	17.345	15.155	5.58875	4.75942	-0.829336	0	0.29777	1.41721	-0.246951
0000008_10.tif	predator	MT15620	cat2(n4547)	15.557	13.915	5.58875	2.73293	-2.85582	0	0.29777	0.813785	-0.850377
0000008_10.tif	predator	MT15620	cat2(n4547)	15.561	13.797	5.58875	2.62995	-2.95881	0	0.29777	0.783119	-0.881044
0000008_10.tif	predator	MT15620	cat2(n4547)	14.87	13.807	5.58875	2.39513	-3.19362	0	0.29777	0.713198	-0.950965
0000008_10.tif	predator	MT15620	cat2(n4547)	15.849	12.946	5.58875	2.11665	-3.4721	0	0.29777	0.630276	-1.03389
0000008_10.tif	predator	MT15620	cat2(n4547)	16.002	12.898	5.58875	2.19774	-3.39101	0	0.29777	0.65442	-1.00974
0000008_10.tif	predator	MT15620	cat2(n4547)	15.578	12.71	5.58875	1.7579	-3.83086	0	0.29777	0.523448	-1.14071
0000008_10.tif	predator	MT15620	cat2(n4547)	15.356	12.075	5.58875	1.19079	-4.39796	0	0.29777	0.354582	-1.30958
0000008_10.tif	predator	MT15620	cat2(n4547)	17.057	11.609	5.58875	2.73234	-2.85642	0	0.29777	0.813608	-0.850555
0000008_10.tif	predator	MT15620	cat2(n4547)	16.012	11.283	5.58875	1.6948	-3.89396	0	0.29777	0.50466	-1.1595
0000008_10.tif	predator	MT15620	cat2(n4547)	16.092	11.262	5.58875	1.77669	-3.81206	0	0.29777	0.529046	-1.13512
0000008_10.tif	predator	MT15620	cat2(n4547)	14.804	10.394	5.58875	1.18024	-4.40851	0	0.29777	0.351441	-1.31272
0000008_10.tif	predator	MT15620	cat2(n4547)	16.932	9.852	5.58875	3.06785	-2.5209	0	0.29777	0.913514	-0.750649
0000008_10.tif	predator	MT15620	cat2(n4547)	15.168	8.38	5.58875	3.206	-2.38275	0	0.29777	0.954651	-0.709512
0000008_10.tif	predator	MT15620	cat2(n4547)	14.731	8.509	5.58875	2.99226	-2.59649	0	0.29777	0.891006	-0.773157
0000008_10.tif	predator	MT15620	cat2(n4547)	15.422	8.234	5.58875	3.41971	-2.16904	0	0.29777	1.01829	-0.645875
0000008_10.tif	predator	MT15620	cat2(n4547)	16.627	7.825	5.58875	4.31284	-1.27591	0	0.29777	1.28423	-0.379928
0000008_10.tif	predator	MT15620	cat2(n4547)	16.696	7.766	5.58875	4.39962	-1.18913	0	0.29777	1.31008	-0.354087
0000008_10.tif	predator	MT15620	cat2(n4547)	17.068	7.637	5.58875	4.71489	-0.873865	0	0.29777	1.40395	-0.260211
0000008_10.tif	predator	MT15620	cat2(n4547)	16.984	7.491	5.58875	4.78734	-0.801413	0	0.29777	1.42553	-0.238637
0000008_10.tif	predator	MT15620	cat2(n4547)	15.852	7.158	5.58875	4.57716	-1.01159	0	0.29777	1.36294	-0.301221
0000008_10.tif	predator	MT15620	cat2(n4547)	15.592	6.852	5.58875	4.79172	-0.797033	0	0.29777	1.42683	-0.237332
0000008_10.tif	predator	MT15620	cat2(n4547)	17.04	6.672	5.58875	5.5149	-0.0738504	0	0.29777	1.64217	-0.0219904
0000008_10.tif	predator	MT15620	cat2(n4547)	18.533	4.887	5.58875	7.81477	2.22601	1	0.29777	2.327	0.66284
0000008_10.tif	predator	MT15620	cat2(n4547)	19.125	5	5.58875	8.05754	2.46878	1	0.29777	2.39929	0.73513
0000008_10.tif	predator	MT15620	cat2(n4547)	19.344	5.047	5.58875	8.1527	2.56395	1	0.29777	2.42763	0.763468
00000010_2.tif	control	CB1112	cat2(e1112)	9.332	14.345	5.97911	4.7621	-1.21701	0	0.29777	1.41801	-0.362388
00000010_2.tif	control	CB1112	cat2(e1112)	10.273	14.116	5.97911	3.98408	-1.99502	0	0.29777	1.18634	-0.594058
00000010_2.tif	control	CB1112	cat2(e1112)	8.78	13.349	5.97911	4.5491	-1.43001	0	0.29777	1.35458	-0.425814
00000010_2.tif	control	CB1112	cat2(e1112)	9.28	13.175	5.97911	4.03647	-1.94264	0	0.29777	1.20194	-0.578459
00000010_2.tif	control	CB1112	cat2(e1112)	9.446	13.092	5.97911	3.85277	-2.12634	0	0.29777	1.14724	-0.63316
00000010_2.tif	control	CB1112	cat2(e1112)	9.887	13.269	5.97911	3.61463	-2.36448	0	0.29777	1.07633	-0.70407
00000010_2.tif	control	CB1112	cat2(e1112)	10.307	13.127	5.97911	3.20979	-2.76931	0	0.29777	0.95578	-0.824618
00000010_2.tif	control	CB1112	cat2(e1112)	10.262	12.936	5.97911	3.11313	-2.86598	0	0.29777	0.926996	-0.853402
00000010_2.tif	control	CB1112	cat2(e1112)	8.998	12.273	5.97911	3.86391	-2.1152	0	0.29777	1.15056	-0.629843
00000010_2.tif	control	CB1112	cat2(e1112)	8.3	11.102	5.97911	4.30947	-1.66964	0	0.29777	1.28323	-0.497168
00000010_2.tif	control	CB1112	cat2(e1112)	9.766	11.491	5.97911	2.90198	-3.07713	0	0.29777	0.864122	-0.916276
00000010_2.tif	control	CB1112	cat2(e1112)	8.366	10.078	5.97911	4.31415	-1.66496	0	0.29777	1.28462	-0.495774
00000010_2.tif	control	CB1112	cat2(e1112)	8.856	10.432	5.97911	3.77528	-2.20383	0	0.29777	1.12416	-0.656234
00000010_2.tif	control	CB1112	cat2(e1112)	9.731	9.946	5.97911	3.02256	-2.95655	0	0.29777	0.900027	-0.880371
00000010_2.tif	control	CB1112	cat2(e1112)	10.491	9.7	5.97911	2.4226	-3.5565	0	0.29777	0.721378	-1.05902
00000010_2.tif	control	CB1112	cat2(e1112)	9.071	8.738	5.97911	4.13421	-1.84489	0	0.29777	1.23104	-0.549354
00000010_2.tif	control	CB1112	cat2(e1112)	9.155	8.408	5.97911	4.24631	-1.7328	0	0.29777	1.26442	-0.515975
00000010_2.tif	control	CB1112	cat2(e1112)	9.832	8.106	5.97911	3.92515	-2.05395	0	0.29777	1.16879	-0.611605
00000010_2.tif	control	CB1112	cat2(e1112)	9.95	7.595	5.97911	4.22703	-1.75207	0	0.29777	1.25868	-0.521714
00000010_2.tif	control	CB1112	cat2(e1112)	13.151	8.592	5.97911	2.35734	-3.62176	0	0.29777	0.701946	-1.07845
00000010_2.tif	control	CB1112	cat2(e1112)	13.283	8.675	5.97911	2.31196	-3.66715	0	0.29777	0.688431	-1.09197
00000010_2.tif	control	CB1112	cat2(e1112)	11.477	9.297	5.97911	1.94727	-4.03183	0	0.29777	0.57984	-1.20056
00000010_2.tif	control	CB1112	cat2(e1112)	11.519	9.488	5.97911	1.76885	-4.21025	0	0.29777	0.526711	-1.25369
00000010_2.tif	control	CB1112	cat2(e1112)	11.523	9.564	5.97911	1.70693	-4.27218	0	0.29777	0.508272	-1.27213
00000010_2.tif	control	CB1112	cat2(e1112)	11.703	10.269	5.97911	1.09145	-4.88766	0	0.29777	0.325	-1.4554
00000010_2.tif	control	CB1112	cat2(e1112)	11.543	10.321	5.97911	1.20159	-4.77752	0	0.29777	0.357797	-1.4226
00000010_2.tif	control	CB1112	cat2(e1112)	11.717	10.547	5.97911	0.949217	-5.02989	0	0.29777	0.282648	-1.49775
00000010_2.tif	control	CB1112	cat2(e1112)	11.116	10.887	5.97911	1.488	-4.4911	0	0.29777	0.443082	-1.33732
00000010_2.tif	control	CB1112	cat2(e1112)	12.224	10.411	5.97911	0.607516	-5.37159	0	0.29777	0.1809	-1.5995
00000010_2.tif	control	CB1112	cat2(e1112)	12.373	10.349	5.97911	0.583658	-5.39545	0	0.29777	0.173796	-1.6066
00000010_2.tif	control	CB1112	cat2(e1112)	12.429	10.168	5.97911	0.738047	-5.24106	0	0.29777	0.219768	-1.56063
00000010_2.tif	control	CB1112	cat2(e1112)	12.481	10.97	5.97911	0.149513	-5.82959	0	0.29777	0.0445203	-1.73588
00000010_2.tif	control	CB1112	cat2(e1112)	13.064	10.769	5.97911	0.474401	-5.5047	0	0.29777	0.141262	-1.63914
00000010_2.tif	control	CB1112	cat2(e1112)	12.835	11.283	5.97911	0.460179	-5.51893	0	0.29777	0.137028	-1.64337
00000010_2.tif	control	CB1112	cat2(e1112)	13.182	12.877	5.97911	2.07416	-3.90494	0	0.29777	0.617623	-1.16278
00000010_2.tif	control	CB1112	cat2(e1112)	12.109	13.769	5.97911	2.92617	-3.05293	0	0.29777	0.871326	-0.909072
00000010_2.tif	control	CB1112	cat2(e1112)	12.283	14.349	5.97911	3.47884	-2.50026	0	0.29777	1.03589	-0.744504
00000010_2.tif	control	CB1112	cat2(e1112)	11.266	14.648	5.97911	3.9938	-1.98531	0	0.29777	1.18923	-0.591165
00000010_2.tif	control	CB1112	cat2(e1112)	12.682	16.102	5.97911	5.21758	-0.761522	0	0.29777	1.55364	-0.226759
00000010_2.tif	control	CB1112	cat2(e1112)	11.759	15.102	5.97911	4.30083	-1.67828	0	0.29777	1.28066	-0.499741
00000010_2.tif	control	CB1112	cat2(e1112)	12.554	15.901	5.97911	5.01625	-0.962856	0	0.29777	1.49369	-0.28671
00000010_2.tif	control	CB1112	cat2(e1112)	12.637	15.877	5.97911	4.99211	-0.986996	0	0.29777	1.4865	-0.293898
00000010_2.tif	control	CB1112	cat2(e1112)	13.123	16.474	5.97911	5.61305	-0.36606	0	0.29777	1.6714	-0.109002
00000010_2.tif	control	CB1112	cat2(e1112)	13.144	16.366	5.97911	5.50754	-0.471569	0	0.29777	1.63998	-0.140419
00000010_2.tif	control	CB1112	cat2(e1112)	13.898	15.568	5.97911	4.85849	-1.12062	0	0.29777	1.44671	-0.333686
00000010_2.tif	control	CB1112	cat2(e1112)	14.026	15.394	5.97911	4.72791	-1.25119	0	0.29777	1.40783	-0.372567
00000010_2.tif	control	CB1112	cat2(e1112)	14.161	15.585	5.97911	4.95119	-1.02792	0	0.29777	1.47431	-0.306083
00000010_2.tif	control	CB1112	cat2(e1112)	14.609	14.293	5.97911	3.95405	-2.02506	0	0.29777	1.1774	-0.603002
00000010_2.tif	control	CB1112	cat2(e1112)	14.748	14.22	5.97911	3.96471	-2.01439	0	0.29777	1.18057	-0.599825
00000010_2.tif	control	CB1112	cat2(e1112)	15.22	14.307	5.97911	4.30738	-1.67172	0	0.29777	1.28261	-0.497789
00000010_2.tif	control	CB1112	cat2(e1112)	15.345	14.717	5.97911	4.7114	-1.2677	0	0.29777	1.40291	-0.377484
00000010_2.tif	control	CB1112	cat2(e1112)	14.547	13.53	5.97911	3.28196	-2.69714	0	0.29777	0.97727	-0.803128
00000010_2.tif	control	CB1112	cat2(e1112)	14.776	13.332	5.97911	3.27191	-2.7072	0	0.29777	0.974277	-0.806122
00000010_2.tif	control	CB1112	cat2(e1112)	15.453	13.45	5.97911	3.83354	-2.14557	0	0.29777	1.14151	-0.638885
00000010_2.tif	control	CB1112	cat2(e1112)	15.533	13.602	5.97911	3.99514	-1.98397	0	0.29777	1.18963	-0.590766
00000010_2.tif	control	CB1112	cat2(e1112)	15.741	13.387	5.97911	4.01258	-1.96653	0	0.29777	1.19483	-0.585573
00000010_2.tif	control	CB1112	cat2(e1112)	15.405	12.707	5.97911	3.34145	-2.63766	0	0.29777	0.994983	-0.785415
00000010_2.tif	control	CB1112	cat2(e1112)	15.158	12.168	5.97911	2.85815	-3.12096	0	0.29777	0.85107	-0.929328
00000010_2.tif	control	CB1112	cat2(e1112)	14.325	12.22	5.97911	2.17809	-3.80102	0	0.29777	0.648569	-1.13183
00000010_2.tif	control	CB1112	cat2(e1112)	15.592	11.227	5.97911	3.00751	-2.9716	0	0.29777	0.895546	-0.884852
00000010_2.tif	control	CB1112	cat2(e1112)	15.05	10.634	5.97911	2.45884	-3.52026	0	0.29777	0.73217	-1.04823
00000010_2.tif	control	CB1112	cat2(e1112)	14.922	10.536	5.97911	2.34413	-3.63498	0	0.29777	0.69801	-1.08239
00000010_2.tif	control	CB1112	cat2(e1112)	15.311	10.359	5.97911	2.75763	-3.22148	0	0.29777	0.82114	-0.959259
00000010_2.tif	control	CB1112	cat2(e1112)	15.377	10.297	5.97911	2.83466	-3.14445	0	0.29777	0.844075	-0.936323
00000010_2.tif	control	CB1112	cat2(e1112)	14.089	10.099	5.97911	1.68018	-4.29892	0	0.29777	0.500309	-1.28009
00000010_2.tif	control	CB1112	cat2(e1112)	13.689	10.172	5.97911	1.2983	-4.6808	0	0.29777	0.386596	-1.3938
00000010_2.tif	control	CB1112	cat2(e1112)	14.068	9.464	5.97911	2.04023	-3.93888	0	0.29777	0.607519	-1.17288
00000010_2.tif	control	CB1112	cat2(e1112)	14.106	9.384	5.97911	2.12344	-3.85566	0	0.29777	0.632297	-1.1481
00000010_2.tif	control	CB1112	cat2(e1112)	13.988	9.019	5.97911	2.32323	-3.65587	0	0.29777	0.691789	-1.08861
00000010_2.tif	control	CB1112	cat2(e1112)	15.189	9.467	5.97911	2.94838	-3.03072	0	0.29777	0.877939	-0.902459
00000010_2.tif	control	CB1112	cat2(e1112)	13.752	8.477	5.97911	2.66765	-3.31145	0	0.29777	0.794347	-0.986051
00000010_2.tif	control	CB1112	cat2(e1112)	13.745	8.401	5.97911	2.73352	-3.24558	0	0.29777	0.813961	-0.966438
00000010_2.tif	control	CB1112	cat2(e1112)	14.498	7.745	5.97911	3.66699	-2.31211	0	0.29777	1.09192	-0.688478
00000010_2.tif	control	CB1112	cat2(e1112)	16.498	8.609	5.97911	4.51037	-1.46874	0	0.29777	1.34305	-0.437346
0000010_12.tif	predator	MT15620	cat2(n4547)	9.547	14.512	5.62497	5.42026	-0.20471	0	0.29777	1.61399	-0.0609565
0000010_12.tif	predator	MT15620	cat2(n4547)	10.446	11.234	5.62497	3.36667	-2.25831	0	0.29777	1.00249	-0.672456
0000010_12.tif	predator	MT15620	cat2(n4547)	10.842	10.932	5.62497	2.97928	-2.64569	0	0.29777	0.887141	-0.787807
0000010_12.tif	predator	MT15620	cat2(n4547)	10.793	10.443	5.62497	3.1046	-2.52037	0	0.29777	0.924457	-0.750492
0000010_12.tif	predator	MT15620	cat2(n4547)	9.842	8.297	5.62497	4.89875	-0.726218	0	0.29777	1.4587	-0.216246
0000010_12.tif	predator	MT15620	cat2(n4547)	9.679	8.179	5.62497	5.09998	-0.524989	0	0.29777	1.51862	-0.156326
0000010_12.tif	predator	MT15620	cat2(n4547)	12.682	8.293	5.62497	3.08817	-2.53681	0	0.29777	0.919564	-0.755385
0000010_12.tif	predator	MT15620	cat2(n4547)	12.63	7.464	5.62497	3.88707	-1.7379	0	0.29777	1.15745	-0.517495
0000010_12.tif	predator	MT15620	cat2(n4547)	13.842	6.62	5.62497	4.5471	-1.07787	0	0.29777	1.35399	-0.320959
0000010_12.tif	predator	MT15620	cat2(n4547)	14.224	6.557	5.62497	4.62837	-0.996599	0	0.29777	1.37819	-0.296757
0000010_12.tif	predator	MT15620	cat2(n4547)	14.043	8.252	5.62497	2.92414	-2.70083	0	0.29777	0.870721	-0.804227
0000010_12.tif	predator	MT15620	cat2(n4547)	14.071	8.634	5.62497	2.54621	-3.07877	0	0.29777	0.758184	-0.916764
0000010_12.tif	predator	MT15620	cat2(n4547)	12.7	9.207	5.62497	2.25347	-3.3715	0	0.29777	0.671017	-1.00393
0000010_12.tif	predator	MT15620	cat2(n4547)	12.839	9.13	5.62497	2.25745	-3.36752	0	0.29777	0.672202	-1.00275
0000010_12.tif	predator	MT15620	cat2(n4547)	12.783	9.495	5.62497	1.96327	-3.6617	0	0.29777	0.584603	-1.09035
0000010_12.tif	predator	MT15620	cat2(n4547)	12.734	9.634	5.62497	1.87408	-3.75089	0	0.29777	0.558045	-1.1169
0000010_12.tif	predator	MT15620	cat2(n4547)	12.411	9.849	5.62497	1.92352	-3.70145	0	0.29777	0.572766	-1.10218
0000010_12.tif	predator	MT15620	cat2(n4547)	12.47	10.196	5.62497	1.65644	-3.96853	0	0.29777	0.493239	-1.18171
0000010_12.tif	predator	MT15620	cat2(n4547)	12.661	10.276	5.62497	1.45557	-4.1694	0	0.29777	0.433425	-1.24152
0000010_12.tif	predator	MT15620	cat2(n4547)	11.623	10.682	5.62497	2.24209	-3.38289	0	0.29777	0.667626	-1.00732
0000010_12.tif	predator	MT15620	cat2(n4547)	13.071	9.2	5.62497	2.10194	-3.52303	0	0.29777	0.625896	-1.04905
0000010_12.tif	predator	MT15620	cat2(n4547)	13.405	9.342	5.62497	1.86983	-3.75514	0	0.29777	0.55678	-1.11817
0000010_12.tif	predator	MT15620	cat2(n4547)	14.175	9.3	5.62497	1.90196	-3.72301	0	0.29777	0.566347	-1.1086
0000010_12.tif	predator	MT15620	cat2(n4547)	13.689	10.446	5.62497	0.731416	-4.89356	0	0.29777	0.217794	-1.45715
0000010_12.tif	predator	MT15620	cat2(n4547)	14.37	10.8	5.62497	0.667872	-4.9571	0	0.29777	0.198872	-1.47608
0000010_12.tif	predator	MT15620	cat2(n4547)	13.606	11.245	5.62497	0.220273	-5.4047	0	0.29777	0.0655906	-1.60936
0000010_12.tif	predator	MT15620	cat2(n4547)	13.946	11.155	5.62497	0.134536	-5.49044	0	0.29777	0.0400609	-1.63489
0000010_12.tif	predator	MT15620	cat2(n4547)	14.036	11.116	5.62497	0.229732	-5.39524	0	0.29777	0.0684074	-1.60654
0000010_12.tif	predator	MT15620	cat2(n4547)	14.005	11.398	5.62497	0.301015	-5.32396	0	0.29777	0.0896332	-1.58531
0000010_12.tif	predator	MT15620	cat2(n4547)	14.012	11.495	5.62497	0.384167	-5.24081	0	0.29777	0.114393	-1.56055
0000010_12.tif	predator	MT15620	cat2(n4547)	13.606	11.759	5.62497	0.626817	-4.99816	0	0.29777	0.186647	-1.4883
0000010_12.tif	predator	MT15620	cat2(n4547)	14.023	12.231	5.62497	1.08472	-4.54025	0	0.29777	0.322997	-1.35195
0000010_12.tif	predator	MT15620	cat2(n4547)	13.901	12.53	5.62497	1.3659	-4.25907	0	0.29777	0.406725	-1.26822
0000010_12.tif	predator	MT15620	cat2(n4547)	13.648	12.571	5.62497	1.41355	-4.21143	0	0.29777	0.420912	-1.25404
0000010_12.tif	predator	MT15620	cat2(n4547)	13.818	12.776	5.62497	1.60901	-4.01596	0	0.29777	0.479115	-1.19583
0000010_12.tif	predator	MT15620	cat2(n4547)	14.155	12.592	5.62497	1.4657	-4.15927	0	0.29777	0.436441	-1.23851
0000010_12.tif	predator	MT15620	cat2(n4547)	11.45	12.988	5.62497	2.98246	-2.64251	0	0.29777	0.888088	-0.78686
0000010_12.tif	predator	MT15620	cat2(n4547)	11.363	13.036	5.62497	3.08071	-2.54426	0	0.29777	0.917342	-0.757606
0000010_12.tif	predator	MT15620	cat2(n4547)	12.168	14.835	5.62497	4.01957	-1.6054	0	0.29777	1.19691	-0.47804
0000010_12.tif	predator	MT15620	cat2(n4547)	12.599	15.46	5.62497	4.46108	-1.16389	0	0.29777	1.32838	-0.346573
0000010_12.tif	predator	MT15620	cat2(n4547)	12.502	15.255	5.62497	4.29277	-1.33221	0	0.29777	1.27826	-0.396691
0000010_12.tif	predator	MT15620	cat2(n4547)	15.78	14.682	5.62497	4.02843	-1.59654	0	0.29777	1.19955	-0.475403
0000010_12.tif	predator	MT15620	cat2(n4547)	15.79	14.342	5.62497	3.74074	-1.88424	0	0.29777	1.11388	-0.561069
0000010_12.tif	predator	MT15620	cat2(n4547)	15.609	14.172	5.62497	3.50132	-2.12365	0	0.29777	1.04259	-0.63236
0000010_12.tif	predator	MT15620	cat2(n4547)	15.186	14.349	5.62497	3.46598	-2.159	0	0.29777	1.03206	-0.642884
0000010_12.tif	predator	MT15620	cat2(n4547)	15.557	12.925	5.62497	2.47701	-3.14796	0	0.29777	0.73758	-0.937368
0000010_12.tif	predator	MT15620	cat2(n4547)	15.439	12.807	5.62497	2.31014	-3.31484	0	0.29777	0.687889	-0.987059
0000010_12.tif	predator	MT15620	cat2(n4547)	15.408	12.727	5.62497	2.23177	-3.3932	0	0.29777	0.664555	-1.01039
0000010_12.tif	predator	MT15620	cat2(n4547)	15.259	12.276	5.62497	1.8231	-3.80187	0	0.29777	0.542864	-1.13208
0000010_12.tif	predator	MT15620	cat2(n4547)	15.273	11.918	5.62497	1.64272	-3.98226	0	0.29777	0.489152	-1.1858
0000010_12.tif	predator	MT15620	cat2(n4547)	15.241	11.832	5.62497	1.57616	-4.04882	0	0.29777	0.469332	-1.20562
0000010_12.tif	predator	MT15620	cat2(n4547)	17.089	12.613	5.62497	3.58185	-2.04312	0	0.29777	1.06657	-0.608381
0000010_12.tif	predator	MT15620	cat2(n4547)	16.828	12.318	5.62497	3.22817	-2.39681	0	0.29777	0.961251	-0.713697
0000010_12.tif	predator	MT15620	cat2(n4547)	16.665	11.415	5.62497	2.86376	-2.76121	0	0.29777	0.852741	-0.822207
0000010_12.tif	predator	MT15620	cat2(n4547)	15.377	10.12	5.62497	1.88293	-3.74204	0	0.29777	0.560681	-1.11427
0000010_12.tif	predator	MT15620	cat2(n4547)	15.248	9.821	5.62497	1.9682	-3.65677	0	0.29777	0.586071	-1.08888
0000010_12.tif	predator	MT15620	cat2(n4547)	15.707	9.905	5.62497	2.27677	-3.34821	0	0.29777	0.677953	-0.996995
0000010_12.tif	predator	MT15620	cat2(n4547)	16.373	10.068	5.62497	2.78685	-2.83812	0	0.29777	0.82984	-0.845108
0000010_12.tif	predator	MT15620	cat2(n4547)	15.866	9.259	5.62497	2.80346	-2.82151	0	0.29777	0.834786	-0.840162
0000010_12.tif	predator	MT15620	cat2(n4547)	16.172	8.96	5.62497	3.23117	-2.3938	0	0.29777	0.962145	-0.712803
0000010_12.tif	predator	MT15620	cat2(n4547)	16.366	8.408	5.62497	3.75965	-1.86532	0	0.29777	1.11951	-0.555436
0000010_12.tif	predator	MT15620	cat2(n4547)	15.165	8.536	5.62497	2.95851	-2.66646	0	0.29777	0.880955	-0.793993
0000010_12.tif	predator	MT15620	cat2(n4547)	14.477	8.165	5.62497	3.07477	-2.5502	0	0.29777	0.915575	-0.759373
0000010_12.tif	predator	MT15620	cat2(n4547)	15.946	8.043	5.62497	3.7833	-1.84168	0	0.29777	1.12655	-0.548396
0000010_12.tif	predator	MT15620	cat2(n4547)	15.71	8.016	5.62497	3.67848	-1.94649	0	0.29777	1.09534	-0.579608
0000010_12.tif	predator	MT15620	cat2(n4547)	15.686	7.627	5.62497	4.00543	-1.61954	0	0.29777	1.1927	-0.482251
0000010_12.tif	predator	MT15620	cat2(n4547)	16.859	7.894	5.62497	4.47177	-1.1532	0	0.29777	1.33156	-0.343389
0000010_12.tif	predator	MT15620	cat2(n4547)	16.932	7.873	5.62497	4.53705	-1.08792	0	0.29777	1.351	-0.32395
0000010_12.tif	predator	MT15620	cat2(n4547)	14.984	7.505	5.62497	3.84497	-1.78	0	0.29777	1.14492	-0.53003
0000010_12.tif	predator	MT15620	cat2(n4547)	15.019	7.443	5.62497	3.91472	-1.71025	0	0.29777	1.16569	-0.509262
0000010_12.tif	predator	MT15620	cat2(n4547)	15.116	7.405	5.62497	3.98159	-1.64338	0	0.29777	1.1856	-0.48935
0000010_12.tif	predator	MT15620	cat2(n4547)	14.491	7.082	5.62497	4.14105	-1.48393	0	0.29777	1.23308	-0.441869
0000010_12.tif	predator	MT15620	cat2(n4547)	14.46	6.932	5.62497	4.28429	-1.34068	0	0.29777	1.27573	-0.399216
0000010_12.tif	predator	MT15620	cat2(n4547)	15.05	5.859	5.62497	5.45046	-0.174514	0	0.29777	1.62298	-0.0519649
0000010_12.tif	predator	MT15620	cat2(n4547)	15.72	6.2	5.62497	5.32086	-0.304113	0	0.29777	1.58439	-0.0905557
0000010_12.tif	predator	MT15620	cat2(n4547)	17.252	4.207	5.62497	7.76371	2.13874	1	0.29777	2.3118	0.636852
0000010_12.tif	predator	MT15620	cat2(n4547)	17.602	10.057	5.62497	3.9492	-1.67577	0	0.29777	1.17595	-0.498994
0000010_12.tif	predator	MT15620	cat2(n4547)	17.547	10.134	5.62497	3.87522	-1.74976	0	0.29777	1.15392	-0.521025
0000010_12.tif	predator	MT15620	cat2(n4547)	17.488	11.53	5.62497	3.69388	-1.93109	0	0.29777	1.09993	-0.575022
0000010_12.tif	predator	MT15620	cat2(n4547)	18.002	12.3	5.62497	4.34048	-1.28449	0	0.29777	1.29247	-0.382483
0000010_12.tif	predator	MT15620	cat2(n4547)	18.099	12.63	5.62497	4.52976	-1.09521	0	0.29777	1.34883	-0.326121
0000010_12.tif	predator	MT15620	cat2(n4547)	17.13	12.856	5.62497	3.72315	-1.90182	0	0.29777	1.10864	-0.566306
0000010_12.tif	predator	MT15620	cat2(n4547)	17.46	13.37	5.62497	4.26159	-1.36339	0	0.29777	1.26897	-0.405976
0000010_12.tif	predator	MT15620	cat2(n4547)	18.227	13.137	5.62497	4.83458	-0.790397	0	0.29777	1.43959	-0.235357
0000010_17.tif	predator	N2	wt	6.906	5.25	5.78131	8.92974	3.14843	1	0.29777	2.65901	0.937509
0000010_17.tif	predator	N2	wt	6.349	5.911	5.78131	8.95073	3.16942	1	0.29777	2.66526	0.943759
0000010_17.tif	predator	N2	wt	6.484	6.016	5.78131	8.7798	2.9985	1	0.29777	2.61436	0.892862
0000010_17.tif	predator	N2	wt	7.906	8.516	5.78131	6.27544	0.494134	1	0.29777	1.86864	0.147138
0000010_17.tif	predator	N2	wt	6.833	10.38	5.78131	6.80665	1.02534	1	0.29777	2.02682	0.305317
0000010_17.tif	predator	N2	wt	6.76	14.75	5.78131	7.71631	1.935	1	0.29777	2.29769	0.576186
0000010_17.tif	predator	N2	wt	7.302	14.625	5.78131	7.17963	1.39832	1	0.29777	2.13788	0.416378
0000010_17.tif	predator	N2	wt	7.281	14.495	5.78131	7.13649	1.35519	1	0.29777	2.12503	0.403535
0000010_17.tif	predator	N2	wt	7.177	17.469	5.78131	8.99406	3.21275	1	0.29777	2.67816	0.956662
0000010_17.tif	predator	N2	wt	7.156	17.531	5.78131	9.05253	3.27123	1	0.29777	2.69557	0.974073
0000010_17.tif	predator	N2	wt	9.771	18.359	5.78131	8.14495	2.36364	1	0.29777	2.42532	0.703822
0000010_17.tif	predator	N2	wt	9.87	18.276	5.78131	8.02534	2.24403	1	0.29777	2.38971	0.668206
0000010_17.tif	predator	N2	wt	11.167	15.901	5.78131	5.31988	-0.461429	0	0.29777	1.5841	-0.1374
0000010_17.tif	predator	N2	wt	12.198	15.776	5.78131	4.81578	-0.96553	0	0.29777	1.43399	-0.287506
0000010_17.tif	predator	N2	wt	12.167	15.521	5.78131	4.58188	-1.19942	0	0.29777	1.36435	-0.357152
0000010_17.tif	predator	N2	wt	10.349	14.667	5.78131	4.77284	-1.00846	0	0.29777	1.42121	-0.30029
0000010_17.tif	predator	N2	wt	10.146	14.62	5.78131	4.87975	-0.90156	0	0.29777	1.45304	-0.268458
0000010_17.tif	predator	N2	wt	8.719	9.781	5.78131	5.0682	-0.713108	0	0.29777	1.50916	-0.212342
0000010_17.tif	predator	N2	wt	11.688	12.229	5.78131	2.1819	-3.59941	0	0.29777	0.649704	-1.0718
0000010_17.tif	predator	N2	wt	8.562	9.771	5.78131	5.22205	-0.559252	0	0.29777	1.55497	-0.166529
0000010_17.tif	predator	N2	wt	8.542	9.578	5.78131	5.296	-0.485305	0	0.29777	1.57699	-0.144509
0000010_17.tif	predator	N2	wt	8.484	8.703	5.78131	5.67304	-0.108264	0	0.29777	1.68926	-0.0322379
0000010_17.tif	predator	N2	wt	8.427	8.526	5.78131	5.80282	0.0215188	1	0.29777	1.72791	0.00640766
0000010_17.tif	predator	N2	wt	8.651	8.25	5.78131	5.73952	-0.0417813	0	0.29777	1.70906	-0.0124412
0000010_17.tif	predator	N2	wt	8.432	8.198	5.78131	5.95493	0.173626	1	0.29777	1.7732	0.0517005
0000010_17.tif	predator	N2	wt	9	8.677	5.78131	5.22541	-0.555893	0	0.29777	1.55597	-0.165528
0000010_17.tif	predator	N2	wt	8.635	6.052	5.78131	7.12425	1.34294	1	0.29777	2.12139	0.399888
0000010_17.tif	predator	N2	wt	8.484	5.823	5.78131	7.39395	1.61264	1	0.29777	2.2017	0.480196
0000010_17.tif	predator	N2	wt	9.458	5.953	5.78131	6.65525	0.87394	1	0.29777	1.98173	0.260233
0000010_17.tif	predator	N2	wt	9.719	6.115	5.78131	6.36697	0.585666	1	0.29777	1.89589	0.174394
0000010_17.tif	predator	N2	wt	10.13	6.828	5.78131	5.55214	-0.229169	0	0.29777	1.65326	-0.0682397
0000010_17.tif	predator	N2	wt	10.401	6.885	5.78131	5.34142	-0.439885	0	0.29777	1.59051	-0.130985
0000010_17.tif	predator	N2	wt	9.911	4.255	5.78131	7.832	2.0507	1	0.29777	2.33213	0.610635
0000010_17.tif	predator	N2	wt	10.005	4.245	5.78131	7.79712	2.01581	1	0.29777	2.32175	0.600248
0000010_17.tif	predator	N2	wt	9.693	3.677	5.78131	8.44499	2.66369	1	0.29777	2.51467	0.793166
0000010_17.tif	predator	N2	wt	13.974	6.196	5.78131	4.9855	-0.795802	0	0.29777	1.48453	-0.236966
0000010_17.tif	predator	N2	wt	14.957	9.623	5.78131	2.05954	-3.72177	0	0.29777	0.613269	-1.10823
0000010_17.tif	predator	N2	wt	14.946	9.957	5.78131	1.81439	-3.96692	0	0.29777	0.54027	-1.18123
0000010_17.tif	predator	N2	wt	15.439	10.259	5.78131	2.05633	-3.72498	0	0.29777	0.612313	-1.10919
0000010_17.tif	predator	N2	wt	15.943	10.325	5.78131	2.49535	-3.28596	0	0.29777	0.74304	-0.978459
0000010_17.tif	predator	N2	wt	12.745	11.623	5.78131	0.96371	-4.8176	0	0.29777	0.286964	-1.43454
0000010_17.tif	predator	N2	wt	13.349	12.03	5.78131	0.897103	-4.8842	0	0.29777	0.26713	-1.45437
0000010_17.tif	predator	N2	wt	15.026	11.592	5.78131	1.49374	-4.28757	0	0.29777	0.44479	-1.27671
0000010_17.tif	predator	N2	wt	15.151	11.7	5.78131	1.6457	-4.1356	0	0.29777	0.490041	-1.23146
0000010_17.tif	predator	N2	wt	14.436	12.835	5.78131	1.86847	-3.91283	0	0.29777	0.556375	-1.16512
0000010_17.tif	predator	N2	wt	14.641	12.97	5.78131	2.08495	-3.69636	0	0.29777	0.620836	-1.10066
0000010_17.tif	predator	N2	wt	13.547	13.172	5.78131	2.00555	-3.77575	0	0.29777	0.597193	-1.12431
0000010_17.tif	predator	N2	wt	13.634	13.113	5.78131	1.94641	-3.83489	0	0.29777	0.579583	-1.14192
0000010_17.tif	predator	N2	wt	13.332	13.759	5.78131	2.60521	-3.1761	0	0.29777	0.775753	-0.945747
0000010_17.tif	predator	N2	wt	15.377	14.457	5.78131	3.74208	-2.03922	0	0.29777	1.11428	-0.607219
0000010_17.tif	predator	N2	wt	15.439	14.54	5.78131	3.84463	-1.93668	0	0.29777	1.14481	-0.576685
0000010_17.tif	predator	N2	wt	12.998	17.45	5.78131	6.3112	0.529899	1	0.29777	1.87929	0.157788
0000010_17.tif	predator	N2	wt	13.418	17.672	5.78131	6.50738	0.726075	1	0.29777	1.9377	0.216203
0000010_17.tif	predator	N2	wt	18.396	15.906	5.78131	6.74665	0.965347	1	0.29777	2.00895	0.287451
0000010_17.tif	predator	N2	wt	18.615	15.812	5.78131	6.84006	1.05876	1	0.29777	2.03677	0.315266
0000010_17.tif	predator	N2	wt	18.438	15.667	5.78131	6.61168	0.830376	1	0.29777	1.96876	0.247261
0000010_17.tif	predator	N2	wt	19.339	15.057	5.78131	6.93809	1.15679	1	0.29777	2.06596	0.344456
0000010_17.tif	predator	N2	wt	19.161	14.609	5.78131	6.54514	0.763834	1	0.29777	1.94895	0.227447
0000010_17.tif	predator	N2	wt	20.208	14.875	5.78131	7.5825	1.80119	1	0.29777	2.25784	0.536341
0000010_17.tif	predator	N2	wt	19.391	12.49	5.78131	5.94605	0.164747	1	0.29777	1.77056	0.0490567
0000010_17.tif	predator	N2	wt	19.516	12.474	5.78131	6.06451	0.283209	1	0.29777	1.80583	0.0843311
0000010_17.tif	predator	N2	wt	19.802	12.526	5.78131	6.35501	0.573704	1	0.29777	1.89233	0.170832
0000010_17.tif	predator	N2	wt	19.781	12.318	5.78131	6.29315	0.511847	1	0.29777	1.87391	0.152413
0000010_17.tif	predator	N2	wt	18.88	10.646	5.78131	5.31161	-0.469692	0	0.29777	1.58164	-0.13986
0000010_17.tif	predator	N2	wt	16.396	10.167	5.78131	2.9751	-2.80621	0	0.29777	0.885895	-0.835605
0000010_17.tif	predator	N2	wt	16.505	9.99	5.78131	3.13994	-2.64136	0	0.29777	0.934981	-0.786518
0000010_17.tif	predator	N2	wt	20.208	10.193	5.78131	6.68533	0.904027	1	0.29777	1.99069	0.269192
0000010_17.tif	predator	N2	wt	20.161	9.589	5.78131	6.75393	0.972625	1	0.29777	2.01112	0.289618
0000010_17.tif	predator	N2	wt	20.057	9.5	5.78131	6.67452	0.893218	1	0.29777	1.98747	0.265973
0000010_17.tif	predator	N2	wt	18.51	7.901	5.78131	5.90202	0.120712	1	0.29777	1.75744	0.0359445
0000010_17.tif	predator	N2	wt	19.401	7.755	5.78131	6.73521	0.9539	1	0.29777	2.00554	0.284043
0000010_17.tif	predator	N2	wt	20.698	7.135	5.78131	8.16847	2.38716	1	0.29777	2.43232	0.710825
0000010_17.tif	predator	N2	wt	19.193	6.37	5.78131	7.37292	1.59162	1	0.29777	2.19544	0.473936
0000010_17.tif	predator	N2	wt	19.354	6.375	5.78131	7.49272	1.71142	1	0.29777	2.23111	0.509608
0000010_17.tif	predator	N2	wt	19.427	6.312	5.78131	7.58913	1.80783	1	0.29777	2.25982	0.538316
0000010_17.tif	predator	N2	wt	19.771	6.396	5.78131	7.80498	2.02368	1	0.29777	2.32409	0.602591
0000010_17.tif	predator	N2	wt	18.396	5.672	5.78131	7.29755	1.51624	1	0.29777	2.17299	0.451492
0000010_17.tif	predator	N2	wt	17.005	5.062	5.78131	6.99328	1.21197	1	0.29777	2.08239	0.360889
0000010_17.tif	predator	N2	wt	19.729	3.365	5.78131	9.92519	4.14389	1	0.29777	2.95542	1.23392
0000010_17.tif	predator	N2	wt	18.062	2.807	5.78131	9.47906	3.69776	1	0.29777	2.82258	1.10108
0000010_17.tif	predator	N2	wt	17.896	2.74	5.78131	9.46158	3.68028	1	0.29777	2.81738	1.09588
0000010_17.tif	predator	N2	wt	22.37	5.839	5.78131	10.2667	4.48543	1	0.29777	3.05712	1.33563
0000010_17.tif	predator	N2	wt	22.125	6.062	5.78131	9.94178	4.16047	1	0.29777	2.96036	1.23886
0000010_17.tif	predator	N2	wt	22.755	10.333	5.78131	9.19888	3.41758	1	0.29777	2.73915	1.01765
0000010_17.tif	predator	N2	wt	23.391	11.385	5.78131	9.79943	4.01812	1	0.29777	2.91797	1.19648
0000010_17.tif	predator	N2	wt	22.052	14.411	5.78131	9.05877	3.27746	1	0.29777	2.69743	0.97593
0000010_17.tif	predator	N2	wt	22.302	15.474	5.78131	9.71491	3.93361	1	0.29777	2.89281	1.17131
0000010_17.tif	predator	N2	wt	22.385	15.422	5.78131	9.76661	3.98531	1	0.29777	2.9082	1.1867
0000010_17.tif	predator	N2	wt	22.417	15.505	5.78131	9.83176	4.05046	1	0.29777	2.9276	1.2061
0000010_17.tif	predator	N2	wt	22.547	15.432	5.78131	9.91698	4.13567	1	0.29777	2.95298	1.23148
0000016_15.tif	control	N2	wt	10.065	15.185	5.72404	5.07426	-0.649776	0	0.29777	1.51096	-0.193484
0000016_15.tif	control	N2	wt	10.172	15.159	5.72404	4.98776	-0.736278	0	0.29777	1.4852	-0.219242
0000016_15.tif	control	N2	wt	12.076	15.245	5.72404	4.19128	-1.53275	0	0.29777	1.24804	-0.456408
0000016_15.tif	control	N2	wt	10.865	13.633	5.72404	3.37882	-2.34521	0	0.29777	1.00611	-0.698334
0000016_15.tif	control	N2	wt	11.654	13.271	5.72404	2.58769	-3.13634	0	0.29777	0.770537	-0.933909
0000016_15.tif	control	N2	wt	11.549	13.07	5.72404	2.50007	-3.22396	0	0.29777	0.744446	-0.96
0000016_15.tif	control	N2	wt	10.221	12.224	5.72404	3.1683	-2.55574	0	0.29777	0.943424	-0.761022
0000016_15.tif	control	N2	wt	10.06	11.648	5.72404	3.19363	-2.53041	0	0.29777	0.950966	-0.75348
0000016_15.tif	control	N2	wt	9.872	11.367	5.72404	3.35549	-2.36855	0	0.29777	0.999164	-0.705282
0000016_15.tif	control	N2	wt	8.036	12.248	5.72404	5.29004	-0.433998	0	0.29777	1.57521	-0.129232
0000016_15.tif	control	N2	wt	8.252	12.401	5.72404	5.11173	-0.612309	0	0.29777	1.52212	-0.182327
0000016_15.tif	control	N2	wt	8.595	12.595	5.72404	4.83061	-0.893425	0	0.29777	1.43841	-0.266035
0000016_15.tif	control	N2	wt	8.245	11.481	5.72404	4.98615	-0.737882	0	0.29777	1.48473	-0.219719
0000016_15.tif	control	N2	wt	8.384	11.45	5.72404	4.84575	-0.878286	0	0.29777	1.44292	-0.261527
0000016_15.tif	control	N2	wt	7.72	10.776	5.72404	5.5214	-0.202636	0	0.29777	1.64411	-0.060339
0000016_15.tif	control	N2	wt	8.109	10.554	5.72404	5.1574	-0.566631	0	0.29777	1.53572	-0.168726
0000016_15.tif	control	N2	wt	8.363	10.55	5.72404	4.90614	-0.817896	0	0.29777	1.4609	-0.243545
0000016_15.tif	control	N2	wt	8.932	11.189	5.72404	4.29207	-1.43196	0	0.29777	1.27805	-0.426396
0000016_15.tif	control	N2	wt	9.05	11.314	5.72404	4.1752	-1.54884	0	0.29777	1.24325	-0.461198
0000016_15.tif	control	N2	wt	9.005	11.526	5.72404	4.23052	-1.49352	0	0.29777	1.25972	-0.444724
0000016_15.tif	control	N2	wt	8.95	11.807	5.72404	4.31494	-1.40909	0	0.29777	1.28486	-0.419586
0000016_15.tif	control	N2	wt	11.047	10.474	5.72404	2.29933	-3.4247	0	0.29777	0.684672	-1.01977
0000016_15.tif	control	N2	wt	11.165	11.182	5.72404	2.05925	-3.66479	0	0.29777	0.613182	-1.09126
0000016_15.tif	control	N2	wt	11.394	11.731	5.72404	1.90163	-3.82241	0	0.29777	0.566248	-1.1382
0000016_15.tif	control	N2	wt	11.342	12.03	5.72404	2.05129	-3.67275	0	0.29777	0.610812	-1.09363
0000016_15.tif	control	N2	wt	11.363	12.116	5.72404	2.06807	-3.65596	0	0.29777	0.61581	-1.08864
0000016_15.tif	control	N2	wt	8.259	9.679	5.72404	5.19687	-0.527167	0	0.29777	1.54747	-0.156975
0000016_15.tif	control	N2	wt	8.901	9.609	5.72404	4.61133	-1.11271	0	0.29777	1.37312	-0.331331
0000016_15.tif	control	N2	wt	8.099	8.543	5.72404	5.77926	0.0552254	1	0.29777	1.72089	0.0164445
0000016_15.tif	control	N2	wt	8.314	8.082	5.72404	5.82388	0.099839	1	0.29777	1.73418	0.0297291
0000016_15.tif	control	N2	wt	9.071	8.72	5.72404	4.84432	-0.879715	0	0.29777	1.44249	-0.261953
0000016_15.tif	control	N2	wt	9.148	8.561	5.72404	4.86335	-0.860685	0	0.29777	1.44816	-0.256286
0000016_15.tif	control	N2	wt	10.634	9.13	5.72404	3.32433	-2.39971	0	0.29777	0.989885	-0.714561
0000016_15.tif	control	N2	wt	11.352	9.835	5.72404	2.32509	-3.39895	0	0.29777	0.692341	-1.01211
0000016_15.tif	control	N2	wt	11.394	8.405	5.72404	3.35252	-2.37152	0	0.29777	0.998279	-0.706167
0000016_15.tif	control	N2	wt	11.158	8.106	5.72404	3.73203	-1.99201	0	0.29777	1.11129	-0.593161
0000016_15.tif	control	N2	wt	10.988	8.082	5.72404	3.84826	-1.87577	0	0.29777	1.1459	-0.558549
0000016_15.tif	control	N2	wt	10.689	7.988	5.72404	4.10284	-1.6212	0	0.29777	1.2217	-0.482743
0000016_15.tif	control	N2	wt	11.12	7.63	5.72404	4.15594	-1.56809	0	0.29777	1.23752	-0.466931
0000016_15.tif	control	N2	wt	10.29	7.641	5.72404	4.62328	-1.10076	0	0.29777	1.37667	-0.327773
0000016_15.tif	control	N2	wt	9.13	7.161	5.72404	5.76087	0.0368356	1	0.29777	1.71541	0.0109685
0000016_15.tif	control	N2	wt	12.901	5.564	5.72404	5.65923	-0.0648112	0	0.29777	1.68515	-0.0192988
0000016_15.tif	control	N2	wt	12.96	5.734	5.72404	5.48636	-0.237681	0	0.29777	1.63367	-0.0707742
0000016_15.tif	control	N2	wt	12.474	6.984	5.72404	4.29597	-1.42806	0	0.29777	1.27921	-0.425234
0000016_15.tif	control	N2	wt	12.54	7.693	5.72404	3.58682	-2.13721	0	0.29777	1.06805	-0.636398
0000016_15.tif	control	N2	wt	11.727	8.38	5.72404	3.20508	-2.51895	0	0.29777	0.954378	-0.750068
0000016_15.tif	control	N2	wt	12.762	8.384	5.72404	2.86746	-2.85657	0	0.29777	0.853844	-0.850602
0000016_15.tif	control	N2	wt	12.887	8.03	5.72404	3.20178	-2.52225	0	0.29777	0.953395	-0.751051
0000016_15.tif	control	N2	wt	12.995	7.807	5.72404	3.41469	-2.30935	0	0.29777	1.01679	-0.687655
0000016_15.tif	control	N2	wt	13.214	8.207	5.72404	3.00702	-2.71702	0	0.29777	0.895399	-0.809047
0000016_15.tif	control	N2	wt	13.189	8.443	5.72404	2.77122	-2.95282	0	0.29777	0.825186	-0.87926
0000016_15.tif	control	N2	wt	13.12	8.557	5.72404	2.65903	-3.065	0	0.29777	0.791781	-0.912666
0000016_15.tif	control	N2	wt	11.988	9.203	5.72404	2.36047	-3.36357	0	0.29777	0.702877	-1.00157
0000016_15.tif	control	N2	wt	12.38	9.759	5.72404	1.68207	-4.04197	0	0.29777	0.50087	-1.20358
0000016_15.tif	control	N2	wt	12.488	9.793	5.72404	1.60029	-4.12374	0	0.29777	0.476519	-1.22793
0000016_15.tif	control	N2	wt	12.939	9.675	5.72404	1.56517	-4.15887	0	0.29777	0.46606	-1.23839
0000016_15.tif	control	N2	wt	13.019	9.641	5.72404	1.5863	-4.13773	0	0.29777	0.472353	-1.23209
0000016_15.tif	control	N2	wt	13.245	9.439	5.72404	1.77512	-3.94891	0	0.29777	0.528579	-1.17587
0000016_15.tif	control	N2	wt	13.109	9.168	5.72404	2.04923	-3.67481	0	0.29777	0.610199	-1.09425
0000016_15.tif	control	N2	wt	13.04	8.97	5.72404	2.25153	-3.47251	0	0.29777	0.670438	-1.03401
0000016_15.tif	control	N2	wt	11.602	10.668	5.72404	1.71143	-4.0126	0	0.29777	0.509613	-1.19483
0000016_15.tif	control	N2	wt	11.762	10.668	5.72404	1.56063	-4.16341	0	0.29777	0.464708	-1.23974
0000016_15.tif	control	N2	wt	11.891	10.54	5.72404	1.49371	-4.23033	0	0.29777	0.444782	-1.25966
0000016_15.tif	control	N2	wt	12.807	10.658	5.72404	0.695	-5.02904	0	0.29777	0.20695	-1.4975
0000016_15.tif	control	N2	wt	12.859	10.696	5.72404	0.633679	-5.09036	0	0.29777	0.188691	-1.51576
0000016_15.tif	control	N2	wt	12.79	10.814	5.72404	0.590217	-5.13382	0	0.29777	0.175749	-1.5287
0000016_15.tif	control	N2	wt	13.186	10.96	5.72404	0.256827	-5.46721	0	0.29777	0.0764753	-1.62797
0000016_15.tif	control	N2	wt	13.22	10.887	5.72404	0.327024	-5.39701	0	0.29777	0.0973781	-1.60707
0000016_15.tif	control	N2	wt	13.04	11.193	5.72404	0.185194	-5.53884	0	0.29777	0.0551454	-1.6493
0000016_15.tif	control	N2	wt	13.151	11.203	5.72404	0.0738241	-5.65021	0	0.29777	0.0219826	-1.68246
0000016_15.tif	control	N2	wt	13.092	11.273	5.72404	0.144586	-5.57945	0	0.29777	0.0430533	-1.66139
0000016_15.tif	control	N2	wt	11.762	11.679	5.72404	1.53417	-4.18987	0	0.29777	0.456829	-1.24762
0000016_15.tif	control	N2	wt	12.123	11.901	5.72404	1.29776	-4.42628	0	0.29777	0.386433	-1.31801
0000016_15.tif	control	N2	wt	12.304	11.811	5.72404	1.09673	-4.62731	0	0.29777	0.326572	-1.37787
0000016_15.tif	control	N2	wt	12.373	11.991	5.72404	1.15236	-4.57168	0	0.29777	0.343138	-1.36131
0000016_15.tif	control	N2	wt	12.634	11.811	5.72404	0.83935	-4.88469	0	0.29777	0.249933	-1.45451
0000016_15.tif	control	N2	wt	12.644	11.557	5.72404	0.673832	-5.0502	0	0.29777	0.200647	-1.5038
0000016_15.tif	control	N2	wt	12.738	11.568	5.72404	0.601259	-5.12278	0	0.29777	0.179037	-1.52541
0000016_15.tif	control	N2	wt	12.821	11.609	5.72404	0.5643	-5.15974	0	0.29777	0.168031	-1.53641
0000016_15.tif	control	N2	wt	12.922	11.599	5.72404	0.489315	-5.23472	0	0.29777	0.145703	-1.55874
0000016_15.tif	control	N2	wt	12.964	11.655	5.72404	0.511938	-5.2121	0	0.29777	0.15244	-1.55201
0000016_15.tif	control	N2	wt	12.988	12.332	5.72404	1.14264	-4.5814	0	0.29777	0.340243	-1.3642
0000016_15.tif	control	N2	wt	12.905	12.568	5.72404	1.39107	-4.33297	0	0.29777	0.414219	-1.29023
0000016_15.tif	control	N2	wt	12.863	12.696	5.72404	1.52533	-4.1987	0	0.29777	0.454199	-1.25025
0000016_15.tif	control	N2	wt	12.391	14.356	5.72404	3.25055	-2.47349	0	0.29777	0.967915	-0.736531
0000016_15.tif	control	N2	wt	12.825	14.342	5.72404	3.15335	-2.57069	0	0.29777	0.938972	-0.765475
0000016_15.tif	control	N2	wt	12.703	16.22	5.72404	5.03304	-0.690998	0	0.29777	1.49869	-0.205758
0000016_15.tif	control	N2	wt	13.384	13.516	5.72404	2.30755	-3.41648	0	0.29777	0.68712	-1.01733
0000016_15.tif	control	N2	wt	13.811	13.339	5.72404	2.20458	-3.51945	0	0.29777	0.656459	-1.04799
0000016_15.tif	control	N2	wt	14.043	13.54	5.72404	2.46598	-3.25806	0	0.29777	0.734294	-0.970153
0000016_15.tif	control	N2	wt	14.72	13.467	5.72404	2.70445	-3.01959	0	0.29777	0.805303	-0.899144
0000016_15.tif	control	N2	wt	15.46	13.63	5.72404	3.29192	-2.43211	0	0.29777	0.980236	-0.724211
0000016_15.tif	control	N2	wt	15.738	13.606	5.72404	3.47014	-2.2539	0	0.29777	1.0333	-0.671143
0000016_15.tif	control	N2	wt	15.797	13.745	5.72404	3.6092	-2.11484	0	0.29777	1.07471	-0.629736
0000016_15.tif	control	N2	wt	15.835	13.863	5.72404	3.71948	-2.00456	0	0.29777	1.10755	-0.596897
0000016_15.tif	control	N2	wt	15.957	13.964	5.72404	3.87709	-1.84695	0	0.29777	1.15448	-0.549967
0000016_15.tif	control	N2	wt	16.443	14.352	5.72404	4.49544	-1.22859	0	0.29777	1.33861	-0.365838
0000016_15.tif	control	N2	wt	16.641	14.22	5.72404	4.55104	-1.173	0	0.29777	1.35516	-0.349284
0000016_15.tif	control	N2	wt	16.714	14.325	5.72404	4.6753	-1.04874	0	0.29777	1.39216	-0.312282
0000016_15.tif	control	N2	wt	16.797	14.231	5.72404	4.67639	-1.04765	0	0.29777	1.39249	-0.311958
0000016_15.tif	control	N2	wt	16.825	14.151	5.72404	4.64685	-1.07719	0	0.29777	1.38369	-0.320755
0000016_15.tif	control	N2	wt	15.415	13.102	5.72404	2.89224	-2.8318	0	0.29777	0.861221	-0.843225
0000016_15.tif	control	N2	wt	15.391	12.939	5.72404	2.76975	-2.95429	0	0.29777	0.824748	-0.879698
0000016_15.tif	control	N2	wt	15.488	12.891	5.72404	2.81745	-2.90659	0	0.29777	0.838952	-0.865494
0000016_15.tif	control	N2	wt	15.679	13.12	5.72404	3.10803	-2.616	0	0.29777	0.925479	-0.778968
0000016_15.tif	control	N2	wt	15.946	13.148	5.72404	3.33911	-2.38493	0	0.29777	0.994286	-0.71016
0000016_15.tif	control	N2	wt	16.182	13.297	5.72404	3.61782	-2.10621	0	0.29777	1.07728	-0.627167
0000016_15.tif	control	N2	wt	16.543	13.127	5.72404	3.83084	-1.8932	0	0.29777	1.14071	-0.563737
0000016_15.tif	control	N2	wt	13.318	12.339	5.72404	1.12892	-4.59512	0	0.29777	0.336159	-1.36829
0000016_15.tif	control	N2	wt	13.259	12.283	5.72404	1.06957	-4.65446	0	0.29777	0.318487	-1.38596
0000016_15.tif	control	N2	wt	13.238	12.13	5.72404	0.916107	-4.80793	0	0.29777	0.272789	-1.43166
0000016_15.tif	control	N2	wt	13.335	11.863	5.72404	0.658424	-5.06561	0	0.29777	0.196059	-1.50839
0000016_15.tif	control	N2	wt	13.273	11.696	5.72404	0.484484	-5.23955	0	0.29777	0.144265	-1.56018
0000016_15.tif	control	N2	wt	13.644	11.925	5.72404	0.825785	-4.89825	0	0.29777	0.245894	-1.45855
0000016_15.tif	control	N2	wt	13.686	11.675	5.72404	0.65266	-5.07138	0	0.29777	0.194343	-1.5101
0000016_15.tif	control	N2	wt	13.783	12.304	5.72404	1.22498	-4.49905	0	0.29777	0.364763	-1.33968
0000016_15.tif	control	N2	wt	13.998	11.901	5.72404	1.03491	-4.68912	0	0.29777	0.308166	-1.39628
0000016_15.tif	control	N2	wt	14.05	11.984	5.72404	1.12924	-4.5948	0	0.29777	0.336253	-1.36819
0000016_15.tif	control	N2	wt	14.13	12.061	5.72404	1.24026	-4.48378	0	0.29777	0.369312	-1.33513
0000016_15.tif	control	N2	wt	14.29	11.832	5.72404	1.23219	-4.49185	0	0.29777	0.366908	-1.33754
0000016_15.tif	control	N2	wt	14.391	11.863	5.72404	1.33532	-4.38871	0	0.29777	0.397619	-1.30683
0000016_15.tif	control	N2	wt	14.401	11.967	5.72404	1.39726	-4.32678	0	0.29777	0.416062	-1.28838
0000016_15.tif	control	N2	wt	14.564	11.877	5.72404	1.49505	-4.22899	0	0.29777	0.44518	-1.25927
0000016_15.tif	control	N2	wt	14.519	12.109	5.72404	1.57418	-4.14985	0	0.29777	0.468744	-1.2357
0000016_15.tif	control	N2	wt	14.696	11.842	5.72404	1.60036	-4.12367	0	0.29777	0.476541	-1.22791
0000016_15.tif	control	N2	wt	14.623	12.203	5.72404	1.71328	-4.01076	0	0.29777	0.510163	-1.19428
0000016_15.tif	control	N2	wt	14.748	12.245	5.72404	1.83998	-3.88405	0	0.29777	0.547892	-1.15655
0000016_15.tif	control	N2	wt	14.828	12.207	5.72404	1.8865	-3.83754	0	0.29777	0.561742	-1.1427
0000016_15.tif	control	N2	wt	14.717	12.342	5.72404	1.87121	-3.85282	0	0.29777	0.557191	-1.14726
0000016_15.tif	control	N2	wt	14.873	12.356	5.72404	2.00583	-3.7182	0	0.29777	0.597277	-1.10717
0000016_15.tif	control	N2	wt	14.877	12.623	5.72404	2.17202	-3.55201	0	0.29777	0.646764	-1.05768
0000016_15.tif	control	N2	wt	15.092	12.443	5.72404	2.23604	-3.488	0	0.29777	0.665825	-1.03862
0000016_15.tif	control	N2	wt	15.113	12.345	5.72404	2.2017	-3.52234	0	0.29777	0.6556	-1.04885
0000016_15.tif	control	N2	wt	15.297	12.578	5.72404	2.4815	-3.24254	0	0.29777	0.738915	-0.965531
0000016_15.tif	control	N2	wt	15.352	12.675	5.72404	2.58126	-3.14278	0	0.29777	0.768622	-0.935824
0000016_15.tif	control	N2	wt	15.45	12.519	5.72404	2.58033	-3.14371	0	0.29777	0.768345	-0.936102
0000016_15.tif	control	N2	wt	16.533	12.557	5.72404	3.57115	-2.15288	0	0.29777	1.06338	-0.641064
0000016_15.tif	control	N2	wt	16.839	12.523	5.72404	3.8447	-1.87934	0	0.29777	1.14484	-0.55961
0000016_15.tif	control	N2	wt	13.818	11.134	5.72404	0.599363	-5.12467	0	0.29777	0.178472	-1.52597
0000016_15.tif	control	N2	wt	13.991	11.411	5.72404	0.791895	-4.93214	0	0.29777	0.235803	-1.46864
0000016_15.tif	control	N2	wt	15.047	11.766	5.72404	1.90474	-3.8193	0	0.29777	0.567174	-1.13727
0000016_15.tif	control	N2	wt	15.016	11.679	5.72404	1.85135	-3.87269	0	0.29777	0.551276	-1.15317
0000016_15.tif	control	N2	wt	15.05	11.609	5.72404	1.86823	-3.8558	0	0.29777	0.556304	-1.14814
0000016_15.tif	control	N2	wt	15.269	12.141	5.72404	2.2453	-3.47874	0	0.29777	0.668582	-1.03586
0000016_15.tif	control	N2	wt	15.377	12.123	5.72404	2.33703	-3.38701	0	0.29777	0.695896	-1.00855
0000016_15.tif	control	N2	wt	15.418	12.217	5.72404	2.41239	-3.31164	0	0.29777	0.718339	-0.986108
0000016_15.tif	control	N2	wt	15.443	11.925	5.72404	2.33012	-3.39391	0	0.29777	0.693841	-1.0106
0000016_15.tif	control	N2	wt	16.234	11.866	5.72404	3.07981	-2.64423	0	0.29777	0.917074	-0.787373
0000016_15.tif	control	N2	wt	16.707	12.196	5.72404	3.61879	-2.10525	0	0.29777	1.07757	-0.62688
0000016_15.tif	control	N2	wt	16.891	11.932	5.72404	3.73663	-1.98741	0	0.29777	1.11266	-0.59179
0000016_15.tif	control	N2	wt	15.495	11.436	5.72404	2.28182	-3.44221	0	0.29777	0.679459	-1.02499
0000016_15.tif	control	N2	wt	15.936	11.273	5.72404	2.71264	-3.01139	0	0.29777	0.807743	-0.896703
0000016_15.tif	control	N2	wt	16.023	11.214	5.72404	2.799	-2.92504	0	0.29777	0.833458	-0.870988
0000016_15.tif	control	N2	wt	15.946	11.37	5.72404	2.72647	-2.99757	0	0.29777	0.81186	-0.892586
0000016_15.tif	control	N2	wt	16.398	11.602	5.72404	3.19763	-2.52641	0	0.29777	0.952157	-0.752289
0000016_15.tif	control	N2	wt	16.45	11.45	5.72404	3.23462	-2.48942	0	0.29777	0.963173	-0.741273
0000016_15.tif	control	N2	wt	16.606	11.55	5.72404	3.39865	-2.32539	0	0.29777	1.01202	-0.69243
0000016_15.tif	control	N2	wt	16.658	11.266	5.72404	3.43439	-2.28964	0	0.29777	1.02266	-0.681787
0000016_15.tif	control	N2	wt	14.991	10.797	5.72404	1.81554	-3.9085	0	0.29777	0.540613	-1.16383
0000016_15.tif	control	N2	wt	15.297	10.887	5.72404	2.09863	-3.6254	0	0.29777	0.62491	-1.07954
0000016_15.tif	control	N2	wt	15.905	10.984	5.72404	2.69085	-3.03319	0	0.29777	0.801254	-0.903193
0000016_15.tif	control	N2	wt	15.832	10.8	5.72404	2.64066	-3.08338	0	0.29777	0.786308	-0.918138
0000016_15.tif	control	N2	wt	15.79	10.675	5.72404	2.622	-3.10204	0	0.29777	0.780753	-0.923694
0000016_15.tif	control	N2	wt	15.773	10.533	5.72404	2.6384	-3.08563	0	0.29777	0.785637	-0.918809
0000016_15.tif	control	N2	wt	15.988	10.495	5.72404	2.85599	-2.86805	0	0.29777	0.850427	-0.854019
0000016_15.tif	control	N2	wt	15.866	10.325	5.72404	2.78756	-2.93648	0	0.29777	0.830051	-0.874395
0000016_15.tif	control	N2	wt	15.752	10.248	5.72404	2.70628	-3.01776	0	0.29777	0.805848	-0.898598
0000016_15.tif	control	N2	wt	16.304	10.203	5.72404	3.24168	-2.48235	0	0.29777	0.965277	-0.73917
0000016_15.tif	control	N2	wt	16.457	10.03	5.72404	3.44298	-2.28105	0	0.29777	1.02522	-0.679229
0000016_15.tif	control	N2	wt	16.474	10.582	5.72404	3.31088	-2.41316	0	0.29777	0.985881	-0.718566
0000016_15.tif	control	N2	wt	14.898	9.37	5.72404	2.4905	-3.23353	0	0.29777	0.741597	-0.962849
0000016_15.tif	control	N2	wt	14.96	9.099	5.72404	2.73622	-2.98781	0	0.29777	0.814765	-0.889681
0000016_15.tif	control	N2	wt	15.179	8.953	5.72404	2.989	-2.73503	0	0.29777	0.890036	-0.814411
0000016_15.tif	control	N2	wt	15.311	9.547	5.72404	2.67104	-3.053	0	0.29777	0.795356	-0.909091
0000016_15.tif	control	N2	wt	15.45	9.887	5.72404	2.59153	-3.13251	0	0.29777	0.771679	-0.932768
0000016_15.tif	control	N2	wt	15.63	9.856	5.72404	2.76279	-2.96125	0	0.29777	0.822676	-0.881771
0000016_15.tif	control	N2	wt	15.724	9.72	5.72404	2.91239	-2.81164	0	0.29777	0.867223	-0.837223
0000016_15.tif	control	N2	wt	16.752	9.148	5.72404	4.08842	-1.63562	0	0.29777	1.21741	-0.487039
0000016_15.tif	control	N2	wt	16.533	9.019	5.72404	3.97083	-1.7532	0	0.29777	1.18239	-0.522052
0000016_15.tif	control	N2	wt	16.075	8.807	5.72404	3.7312	-1.99284	0	0.29777	1.11104	-0.593407
0000016_15.tif	control	N2	wt	16.158	8.821	5.72404	3.78613	-1.9379	0	0.29777	1.1274	-0.577049
0000016_15.tif	control	N2	wt	16.307	8.79	5.72404	3.92182	-1.80222	0	0.29777	1.1678	-0.536646
0000016_15.tif	control	N2	wt	16.155	8.703	5.72404	3.85952	-1.86452	0	0.29777	1.14925	-0.555198
0000016_15.tif	control	N2	wt	16.283	8.634	5.72404	4.00173	-1.7223	0	0.29777	1.1916	-0.51285
0000016_15.tif	control	N2	wt	15.918	8.026	5.72404	4.17384	-1.55019	0	0.29777	1.24285	-0.461601
0000016_15.tif	control	N2	wt	14.075	7.783	5.72404	3.53496	-2.18907	0	0.29777	1.05261	-0.65184
0000016_15.tif	control	N2	wt	13.495	6.8	5.72404	4.42231	-1.30173	0	0.29777	1.31683	-0.387615
0000016_15.tif	control	N2	wt	13.436	6.668	5.72404	4.55094	-1.1731	0	0.29777	1.35513	-0.349313
0000016_15.tif	control	N2	wt	13.439	6.384	5.72404	4.83478	-0.889253	0	0.29777	1.43965	-0.264793
0000016_15.tif	control	N2	wt	13.571	6.304	5.72404	4.92225	-0.80179	0	0.29777	1.4657	-0.238749
0000016_15.tif	control	N2	wt	13.745	6.641	5.72404	4.60258	-1.12145	0	0.29777	1.37051	-0.333935
0000016_15.tif	control	N2	wt	13.589	6.391	5.72404	4.83679	-0.887245	0	0.29777	1.44025	-0.264195
0000016_15.tif	control	N2	wt	13.953	6.491	5.72404	4.77893	-0.945106	0	0.29777	1.42302	-0.281424
0000016_15.tif	control	N2	wt	13.953	6.359	5.72404	4.90943	-0.81461	0	0.29777	1.46188	-0.242566
0000016_15.tif	control	N2	wt	13.967	7.023	5.72404	4.25635	-1.46768	0	0.29777	1.26741	-0.437032
0000016_15.tif	control	N2	wt	14.731	7.509	5.72404	3.99976	-1.72428	0	0.29777	1.19101	-0.513438
0000016_15.tif	control	N2	wt	14.547	7.429	5.72404	4.00956	-1.71448	0	0.29777	1.19393	-0.51052
0000016_15.tif	control	N2	wt	14.578	6.96	5.72404	4.46428	-1.25975	0	0.29777	1.32933	-0.375116
0000016_15.tif	control	N2	wt	17.418	8.828	5.72404	4.82521	-0.898828	0	0.29777	1.4368	-0.267644
0000016_15.tif	control	N2	wt	17.314	8.884	5.72404	4.70712	-1.01691	0	0.29777	1.40164	-0.302806
0000016_15.tif	control	N2	wt	17.884	13.043	5.72404	5.00608	-0.717956	0	0.29777	1.49066	-0.213786
0000016_15.tif	control	N2	wt	17.741	14.099	5.72404	5.35971	-0.364324	0	0.29777	1.59596	-0.108485
0000016_15.tif	control	N2	wt	17.655	14.245	5.72404	5.36849	-0.355543	0	0.29777	1.59858	-0.10587
0000016_15.tif	control	N2	wt	18.026	14.352	5.72404	5.7364	0.0123605	1	0.29777	1.70813	0.00368058
0000016_15.tif	control	N2	wt	18.075	14.252	5.72404	5.72378	-0.000257387	0	0.29777	1.70437	-7.6642e-05
0000016_15.tif	control	N2	wt	18.082	16.318	5.72404	7.04635	1.32231	1	0.29777	2.09819	0.393744
0000016_15.tif	control	N2	wt	17.936	16.352	5.72404	6.97151	1.24748	1	0.29777	2.07591	0.371461
00000017_6.tif	predator	CB1112	cat2(e1112)	7.661	13.479	6.03654	5.75846	-0.278082	0	0.29777	1.7147	-0.0828044
00000017_6.tif	predator	CB1112	cat2(e1112)	12.688	13.047	6.03654	1.27158	-4.76496	0	0.29777	0.378638	-1.41886
00000017_6.tif	predator	CB1112	cat2(e1112)	13.115	12.13	6.03654	0.261885	-5.77465	0	0.29777	0.0779816	-1.71952
00000017_6.tif	predator	CB1112	cat2(e1112)	12.151	11.099	6.03654	1.3022	-4.73434	0	0.29777	0.387756	-1.40974
00000017_6.tif	predator	CB1112	cat2(e1112)	12.292	10.828	6.03654	1.3851	-4.65144	0	0.29777	0.412442	-1.38506
00000017_6.tif	predator	CB1112	cat2(e1112)	11.396	10.151	6.03654	2.49372	-3.54282	0	0.29777	0.742556	-1.05494
00000017_6.tif	predator	CB1112	cat2(e1112)	9.922	9.75	6.03654	3.90338	-2.13316	0	0.29777	1.16231	-0.635192
00000017_6.tif	predator	CB1112	cat2(e1112)	13.047	8.396	6.03654	3.48706	-2.54948	0	0.29777	1.03834	-0.759159
00000017_6.tif	predator	CB1112	cat2(e1112)	12.307	7.464	6.03654	4.504	-1.53253	0	0.29777	1.34116	-0.456343
00000017_6.tif	predator	CB1112	cat2(e1112)	12.234	4.859	6.03654	7.08619	1.04965	1	0.29777	2.11006	0.312555
00000017_6.tif	predator	CB1112	cat2(e1112)	16.005	7.792	6.03654	4.96176	-1.07478	0	0.29777	1.47746	-0.320036
00000017_6.tif	predator	CB1112	cat2(e1112)	13.354	9.448	6.03654	2.43732	-3.59922	0	0.29777	0.725762	-1.07174
00000017_6.tif	predator	CB1112	cat2(e1112)	14.922	11.052	6.03654	1.91704	-4.1195	0	0.29777	0.570836	-1.22666
00000017_6.tif	predator	CB1112	cat2(e1112)	14.104	11.375	6.03654	1.04161	-4.99493	0	0.29777	0.310159	-1.48734
00000017_6.tif	predator	CB1112	cat2(e1112)	14.927	16.099	6.03654	4.56144	-1.4751	0	0.29777	1.35826	-0.439241
00000017_6.tif	predator	CB1112	cat2(e1112)	17.49	12.365	6.03654	4.32428	-1.71225	0	0.29777	1.28764	-0.509858
0000017_11.tif	predator	MT15620	cat2(n4547)	9.53	14.547	5.69278	6.13373	0.44095	1	0.29777	1.82644	0.131302
0000017_11.tif	predator	MT15620	cat2(n4547)	10.894	14.28	5.69278	4.85836	-0.834424	0	0.29777	1.44667	-0.248466
0000017_11.tif	predator	MT15620	cat2(n4547)	10.87	14.047	5.69278	4.73952	-0.95326	0	0.29777	1.41129	-0.283852
0000017_11.tif	predator	MT15620	cat2(n4547)	11.675	13.595	5.69278	3.82225	-1.87053	0	0.29777	1.13815	-0.556987
0000017_11.tif	predator	MT15620	cat2(n4547)	11.446	13.453	5.69278	3.92958	-1.7632	0	0.29777	1.17011	-0.525028
0000017_11.tif	predator	MT15620	cat2(n4547)	11.686	13.099	5.69278	3.5397	-2.15309	0	0.29777	1.05402	-0.641125
0000017_11.tif	predator	MT15620	cat2(n4547)	11.481	13.023	5.69278	3.68249	-2.01029	0	0.29777	1.09653	-0.598605
0000017_11.tif	predator	MT15620	cat2(n4547)	12.234	12.849	5.69278	2.94093	-2.75185	0	0.29777	0.875721	-0.819418
0000017_11.tif	predator	MT15620	cat2(n4547)	12.738	12.672	5.69278	2.42103	-3.27176	0	0.29777	0.720909	-0.974231
0000017_11.tif	predator	MT15620	cat2(n4547)	11.429	12.175	5.69278	3.42495	-2.26783	0	0.29777	1.01985	-0.675291
0000017_11.tif	predator	MT15620	cat2(n4547)	10.696	11.957	5.69278	4.09911	-1.59367	0	0.29777	1.22059	-0.474547
0000017_11.tif	predator	MT15620	cat2(n4547)	11.543	11.193	5.69278	3.20444	-2.48834	0	0.29777	0.954186	-0.740954
0000017_11.tif	predator	MT15620	cat2(n4547)	11.776	10.29	5.69278	3.14193	-2.55085	0	0.29777	0.935573	-0.759566
0000017_11.tif	predator	MT15620	cat2(n4547)	11.762	8.238	5.69278	4.28774	-1.40504	0	0.29777	1.27676	-0.41838
0000017_11.tif	predator	MT15620	cat2(n4547)	11.845	8.071	5.69278	4.35351	-1.33928	0	0.29777	1.29634	-0.398796
0000017_11.tif	predator	MT15620	cat2(n4547)	12.168	7.297	5.69278	4.77592	-0.916866	0	0.29777	1.42212	-0.273015
0000017_11.tif	predator	MT15620	cat2(n4547)	12.759	7.391	5.69278	4.40063	-1.29215	0	0.29777	1.31037	-0.384765
0000017_11.tif	predator	MT15620	cat2(n4547)	12.793	7.585	5.69278	4.21255	-1.48023	0	0.29777	1.25437	-0.440768
0000017_11.tif	predator	MT15620	cat2(n4547)	13.099	7.488	5.69278	4.16872	-1.52406	0	0.29777	1.24132	-0.45382
0000017_11.tif	predator	MT15620	cat2(n4547)	14.002	7.536	5.69278	3.85429	-1.83849	0	0.29777	1.14769	-0.547447
0000017_11.tif	predator	MT15620	cat2(n4547)	14.925	6.62	5.69278	4.70145	-0.991335	0	0.29777	1.39995	-0.29519
0000017_11.tif	predator	MT15620	cat2(n4547)	15.686	8.922	5.69278	2.57416	-3.11862	0	0.29777	0.766507	-0.928632
0000017_11.tif	predator	MT15620	cat2(n4547)	15.484	8.991	5.69278	2.44153	-3.25126	0	0.29777	0.727013	-0.968126
0000017_11.tif	predator	MT15620	cat2(n4547)	12.998	8.655	5.69278	3.1849	-2.50788	0	0.29777	0.948367	-0.746772
0000017_11.tif	predator	MT15620	cat2(n4547)	13.405	8.79	5.69278	2.86119	-2.8316	0	0.29777	0.851975	-0.843164
0000017_11.tif	predator	MT15620	cat2(n4547)	13.734	9.144	5.69278	2.39758	-3.2952	0	0.29777	0.713928	-0.981212
0000017_11.tif	predator	MT15620	cat2(n4547)	14.578	9.196	5.69278	2.12856	-3.56422	0	0.29777	0.633822	-1.06132
0000017_11.tif	predator	MT15620	cat2(n4547)	14.13	10.214	5.69278	1.26374	-4.42904	0	0.29777	0.376304	-1.31884
0000017_11.tif	predator	MT15620	cat2(n4547)	13.592	10.762	5.69278	1.28006	-4.41273	0	0.29777	0.381162	-1.31398
0000017_11.tif	predator	MT15620	cat2(n4547)	13.505	11.116	5.69278	1.25635	-4.43644	0	0.29777	0.374102	-1.32104
0000017_11.tif	predator	MT15620	cat2(n4547)	14.658	11.127	5.69278	0.209881	-5.4829	0	0.29777	0.0624962	-1.63264
0000017_11.tif	predator	MT15620	cat2(n4547)	14.856	11.036	5.69278	0.303059	-5.38972	0	0.29777	0.090242	-1.6049
0000017_11.tif	predator	MT15620	cat2(n4547)	15.238	10.53	5.69278	0.929512	-4.76327	0	0.29777	0.276781	-1.41836
0000017_11.tif	predator	MT15620	cat2(n4547)	15.422	10.561	5.69278	1.01557	-4.67721	0	0.29777	0.302406	-1.39273
0000017_11.tif	predator	MT15620	cat2(n4547)	15.595	10.595	5.69278	1.1159	-4.57688	0	0.29777	0.332281	-1.36286
0000017_11.tif	predator	MT15620	cat2(n4547)	15.443	10.724	5.69278	0.916537	-4.77624	0	0.29777	0.272917	-1.42222
0000017_11.tif	predator	MT15620	cat2(n4547)	16.078	10.405	5.69278	1.61569	-4.07709	0	0.29777	0.481104	-1.21404
0000017_11.tif	predator	MT15620	cat2(n4547)	16.043	10.328	5.69278	1.63245	-4.06033	0	0.29777	0.486096	-1.20904
0000017_11.tif	predator	MT15620	cat2(n4547)	14.286	11.651	5.69278	0.567071	-5.12571	0	0.29777	0.168857	-1.52628
0000017_11.tif	predator	MT15620	cat2(n4547)	13.012	11.675	5.69278	1.76939	-3.92339	0	0.29777	0.526871	-1.16827
0000017_11.tif	predator	MT15620	cat2(n4547)	13.068	11.783	5.69278	1.74027	-3.95251	0	0.29777	0.518201	-1.17694
0000017_11.tif	predator	MT15620	cat2(n4547)	12.849	12.29	5.69278	2.13063	-3.56215	0	0.29777	0.634439	-1.0607
0000017_11.tif	predator	MT15620	cat2(n4547)	13.498	12.443	5.69278	1.67947	-4.01331	0	0.29777	0.500097	-1.19504
0000017_11.tif	predator	MT15620	cat2(n4547)	15.189	11.693	5.69278	0.581172	-5.11161	0	0.29777	0.173056	-1.52208
0000017_11.tif	predator	MT15620	cat2(n4547)	15.262	11.71	5.69278	0.648809	-5.04397	0	0.29777	0.193196	-1.50194
0000017_11.tif	predator	MT15620	cat2(n4547)	15.286	12.245	5.69278	1.07332	-4.61946	0	0.29777	0.319602	-1.37554
0000017_11.tif	predator	MT15620	cat2(n4547)	15.335	12.457	5.69278	1.28274	-4.41004	0	0.29777	0.381961	-1.31318
0000017_11.tif	predator	MT15620	cat2(n4547)	15.665	11.814	5.69278	1.04519	-4.64759	0	0.29777	0.311225	-1.38391
0000017_11.tif	predator	MT15620	cat2(n4547)	14.97	13.012	5.69278	1.70888	-3.9839	0	0.29777	0.508852	-1.18629
0000017_11.tif	predator	MT15620	cat2(n4547)	15.099	13.106	5.69278	1.82271	-3.87008	0	0.29777	0.542747	-1.15239
0000017_11.tif	predator	MT15620	cat2(n4547)	13.286	13.245	5.69278	2.41703	-3.27576	0	0.29777	0.719718	-0.975422
0000017_11.tif	predator	MT15620	cat2(n4547)	13.748	13.231	5.69278	2.15722	-3.53557	0	0.29777	0.642354	-1.05279
0000017_11.tif	predator	MT15620	cat2(n4547)	13.911	13.46	5.69278	2.29863	-3.39415	0	0.29777	0.684464	-1.01068
0000017_11.tif	predator	MT15620	cat2(n4547)	14.418	13.457	5.69278	2.16385	-3.52893	0	0.29777	0.64433	-1.05081
0000017_11.tif	predator	MT15620	cat2(n4547)	14.835	14.109	5.69278	2.79245	-2.90033	0	0.29777	0.831508	-0.863632
0000017_11.tif	predator	MT15620	cat2(n4547)	14.481	14.283	5.69278	2.97673	-2.71605	0	0.29777	0.886381	-0.808759
0000017_11.tif	predator	MT15620	cat2(n4547)	15.123	14.571	5.69278	3.27489	-2.41789	0	0.29777	0.975163	-0.719976
0000017_11.tif	predator	MT15620	cat2(n4547)	16.304	16.165	5.69278	5.09155	-0.601231	0	0.29777	1.51611	-0.179029
0000017_11.tif	predator	MT15620	cat2(n4547)	16.582	16.005	5.69278	5.03414	-0.658645	0	0.29777	1.49902	-0.196125
0000017_11.tif	predator	MT15620	cat2(n4547)	16.807	15.311	5.69278	4.49398	-1.1988	0	0.29777	1.33817	-0.356966
0000017_11.tif	predator	MT15620	cat2(n4547)	16.915	15.259	5.69278	4.49893	-1.19385	0	0.29777	1.33965	-0.355493
0000017_11.tif	predator	MT15620	cat2(n4547)	17.411	15.512	5.69278	4.96963	-0.723155	0	0.29777	1.47981	-0.215334
0000017_11.tif	predator	MT15620	cat2(n4547)	17.387	15.009	5.69278	4.53912	-1.15366	0	0.29777	1.35161	-0.343525
0000017_11.tif	predator	MT15620	cat2(n4547)	17.616	14.804	5.69278	4.51606	-1.17672	0	0.29777	1.34475	-0.350391
0000017_11.tif	predator	MT15620	cat2(n4547)	18.599	14.127	5.69278	4.76905	-0.923736	0	0.29777	1.42008	-0.275061
0000017_11.tif	predator	MT15620	cat2(n4547)	17.766	13.807	5.69278	3.91428	-1.77851	0	0.29777	1.16555	-0.529586
0000017_11.tif	predator	MT15620	cat2(n4547)	17.87	13.477	5.69278	3.79828	-1.89451	0	0.29777	1.13101	-0.564127
0000017_11.tif	predator	MT15620	cat2(n4547)	17.832	13.238	5.69278	3.63538	-2.0574	0	0.29777	1.08251	-0.612633
0000017_11.tif	predator	MT15620	cat2(n4547)	18.241	13.061	5.69278	3.90641	-1.78637	0	0.29777	1.16321	-0.531927
0000017_11.tif	predator	MT15620	cat2(n4547)	17.731	12.203	5.69278	3.11439	-2.57839	0	0.29777	0.927372	-0.767768
0000017_11.tif	predator	MT15620	cat2(n4547)	17.102	11.859	5.69278	2.41829	-3.27449	0	0.29777	0.720094	-0.975045
0000017_11.tif	predator	MT15620	cat2(n4547)	16.311	11.832	5.69278	1.6482	-4.04459	0	0.29777	0.490783	-1.20436
0000017_11.tif	predator	MT15620	cat2(n4547)	19.005	12.516	5.69278	4.42525	-1.26754	0	0.29777	1.31771	-0.377434
0000017_11.tif	predator	MT15620	cat2(n4547)	18.967	11.505	5.69278	4.22614	-1.46664	0	0.29777	1.25842	-0.436722
0000017_11.tif	predator	MT15620	cat2(n4547)	18.807	11.519	5.69278	4.06697	-1.62581	0	0.29777	1.21102	-0.484118
0000017_11.tif	predator	MT15620	cat2(n4547)	18.859	11.304	5.69278	4.11402	-1.57876	0	0.29777	1.22503	-0.470107
0000017_11.tif	predator	MT15620	cat2(n4547)	18.957	11.057	5.69278	4.22008	-1.4727	0	0.29777	1.25661	-0.438527
0000017_11.tif	predator	MT15620	cat2(n4547)	17.568	10.668	5.69278	2.89687	-2.79592	0	0.29777	0.8626	-0.83254
0000017_11.tif	predator	MT15620	cat2(n4547)	16.53	10.814	5.69278	1.85479	-3.83799	0	0.29777	0.5523	-1.14284
0000017_11.tif	predator	MT15620	cat2(n4547)	17.113	9.595	5.69278	2.92851	-2.76427	0	0.29777	0.872022	-0.823118
0000017_11.tif	predator	MT15620	cat2(n4547)	17.245	9.536	5.69278	3.0701	-2.62268	0	0.29777	0.914184	-0.780956
0000017_11.tif	predator	MT15620	cat2(n4547)	17.655	9.828	5.69278	3.26928	-2.4235	0	0.29777	0.973494	-0.721646
0000017_11.tif	predator	MT15620	cat2(n4547)	18.439	9.929	5.69278	3.94651	-1.74627	0	0.29777	1.17515	-0.519987
0000017_11.tif	predator	MT15620	cat2(n4547)	18.495	9.734	5.69278	4.07082	-1.62196	0	0.29777	1.21217	-0.482972
0000017_11.tif	predator	MT15620	cat2(n4547)	19.193	10.21	5.69278	4.58392	-1.10886	0	0.29777	1.36496	-0.330184
0000017_11.tif	predator	MT15620	cat2(n4547)	19.352	10.286	5.69278	4.72117	-0.971609	0	0.29777	1.40582	-0.289316
0000017_11.tif	predator	MT15620	cat2(n4547)	16.259	9.064	5.69278	2.71527	-2.97751	0	0.29777	0.808527	-0.886613
0000017_11.tif	predator	MT15620	cat2(n4547)	16.224	8.877	5.69278	2.85411	-2.83868	0	0.29777	0.849867	-0.845272
0000017_11.tif	predator	MT15620	cat2(n4547)	17.106	8.7	5.69278	3.52537	-2.16741	0	0.29777	1.04975	-0.64539
0000017_11.tif	predator	MT15620	cat2(n4547)	17.457	8.745	5.69278	3.73835	-1.95443	0	0.29777	1.11317	-0.581971
0000017_14.tif	control	N2	wt	8.839	14.422	5.50523	5.10491	-0.400321	0	0.29777	1.52009	-0.119204
0000017_14.tif	control	N2	wt	9.613	14.464	5.50523	4.47454	-1.03069	0	0.29777	1.33238	-0.30691
0000017_14.tif	control	N2	wt	8.62	12.488	5.50523	4.68561	-0.819616	0	0.29777	1.39524	-0.244057
0000017_14.tif	control	N2	wt	8.939	12.453	5.50523	4.36477	-1.14046	0	0.29777	1.2997	-0.339593
0000017_14.tif	control	N2	wt	9.898	12.703	5.50523	3.4671	-2.03813	0	0.29777	1.0324	-0.606895
0000017_14.tif	control	N2	wt	9.988	12.55	5.50523	3.34577	-2.15946	0	0.29777	0.99627	-0.643022
0000017_14.tif	control	N2	wt	10.259	12.457	5.50523	3.06186	-2.44337	0	0.29777	0.91173	-0.727563
0000017_14.tif	control	N2	wt	9.946	12.061	5.50523	3.32493	-2.1803	0	0.29777	0.990064	-0.649228
0000017_14.tif	control	N2	wt	9.085	11.325	5.50523	4.21768	-1.28755	0	0.29777	1.2559	-0.383395
0000017_14.tif	control	N2	wt	9.776	10.856	5.50523	3.63712	-1.86811	0	0.29777	1.08303	-0.556266
0000017_14.tif	control	N2	wt	10.623	11.554	5.50523	2.66303	-2.8422	0	0.29777	0.79297	-0.846322
0000017_14.tif	control	N2	wt	10.682	11.477	5.50523	2.61524	-2.88999	0	0.29777	0.778739	-0.860553
0000017_14.tif	control	N2	wt	10.793	11.432	5.50523	2.51325	-2.99198	0	0.29777	0.748371	-0.890921
0000017_14.tif	control	N2	wt	10.693	10.675	5.50523	2.84119	-2.66404	0	0.29777	0.846021	-0.793272
0000017_14.tif	control	N2	wt	10.71	10.526	5.50523	2.89248	-2.61275	0	0.29777	0.861294	-0.777998
0000017_14.tif	control	N2	wt	10.13	10.179	5.50523	3.56762	-1.93761	0	0.29777	1.06233	-0.576963
0000017_14.tif	control	N2	wt	10.339	8.891	5.50523	4.18347	-1.32176	0	0.29777	1.24571	-0.393579
0000017_14.tif	control	N2	wt	10.568	8.648	5.50523	4.21011	-1.29512	0	0.29777	1.25364	-0.385648
0000017_14.tif	control	N2	wt	10.214	8.269	5.50523	4.728	-0.777226	0	0.29777	1.40786	-0.231434
0000017_14.tif	control	N2	wt	9.332	8.2	5.50523	5.38691	-0.118324	0	0.29777	1.60406	-0.0352333
0000017_14.tif	control	N2	wt	9.307	8.748	5.50523	5.04808	-0.457151	0	0.29777	1.50317	-0.136126
0000017_14.tif	control	N2	wt	10.627	7.901	5.50523	4.7746	-0.730635	0	0.29777	1.42173	-0.217561
0000017_14.tif	control	N2	wt	12.717	6.689	5.50523	5.21995	-0.28528	0	0.29777	1.55434	-0.0849477
0000017_14.tif	control	N2	wt	12.818	6.644	5.50523	5.25513	-0.250099	0	0.29777	1.56482	-0.074472
0000017_14.tif	control	N2	wt	12.797	6.759	5.50523	5.14243	-0.362798	0	0.29777	1.53126	-0.108031
0000017_14.tif	control	N2	wt	12.925	6.717	5.50523	5.17425	-0.330981	0	0.29777	1.54074	-0.0985563
0000017_14.tif	control	N2	wt	12.453	7.286	5.50523	4.66538	-0.839846	0	0.29777	1.38921	-0.250081
0000017_14.tif	control	N2	wt	12.085	7.898	5.50523	4.15344	-1.35179	0	0.29777	1.23677	-0.402522
0000017_14.tif	control	N2	wt	12.016	8.45	5.50523	3.65067	-1.85456	0	0.29777	1.08706	-0.552232
0000017_14.tif	control	N2	wt	10.939	9.283	5.50523	3.48702	-2.01821	0	0.29777	1.03833	-0.600961
0000017_14.tif	control	N2	wt	11.04	9.168	5.50523	3.50856	-1.99667	0	0.29777	1.04475	-0.594547
0000017_14.tif	control	N2	wt	11.786	9.04	5.50523	3.2025	-2.30273	0	0.29777	0.953608	-0.685684
0000017_14.tif	control	N2	wt	11.974	9.009	5.50523	3.14832	-2.35691	0	0.29777	0.937475	-0.701818
0000017_14.tif	control	N2	wt	12.425	9.405	5.50523	2.61398	-2.89125	0	0.29777	0.778366	-0.860927
0000017_14.tif	control	N2	wt	13.085	9.37	5.50523	2.51652	-2.98871	0	0.29777	0.749343	-0.889949
0000017_14.tif	control	N2	wt	13.196	9.415	5.50523	2.46599	-3.03924	0	0.29777	0.734299	-0.904993
0000017_14.tif	control	N2	wt	12.429	10.054	5.50523	2.00869	-3.49654	0	0.29777	0.598128	-1.04116
0000017_14.tif	control	N2	wt	12.22	10.068	5.50523	2.09224	-3.41299	0	0.29777	0.623006	-1.01629
0000017_14.tif	control	N2	wt	12.262	10.2	5.50523	1.95714	-3.54809	0	0.29777	0.582779	-1.05651
0000017_14.tif	control	N2	wt	12.363	10.165	5.50523	1.9382	-3.56703	0	0.29777	0.577139	-1.06215
0000017_14.tif	control	N2	wt	10.811	10.148	5.50523	3.00447	-2.50076	0	0.29777	0.894641	-0.744651
0000017_14.tif	control	N2	wt	11.231	10.113	5.50523	2.69509	-2.81014	0	0.29777	0.802517	-0.836775
0000017_14.tif	control	N2	wt	11.46	10.259	5.50523	2.42678	-3.07845	0	0.29777	0.722623	-0.916669
0000017_14.tif	control	N2	wt	11.464	10.085	5.50523	2.54347	-2.96176	0	0.29777	0.757368	-0.881924
0000017_14.tif	control	N2	wt	11.293	10.519	5.50523	2.39688	-3.10835	0	0.29777	0.71372	-0.925572
0000017_14.tif	control	N2	wt	11.38	10.651	5.50523	2.2511	-3.25413	0	0.29777	0.670309	-0.968983
0000017_14.tif	control	N2	wt	11.123	11.359	5.50523	2.20542	-3.29981	0	0.29777	0.656709	-0.982584
0000017_14.tif	control	N2	wt	11.55	11.297	5.50523	1.81233	-3.6929	0	0.29777	0.539658	-1.09963
0000017_14.tif	control	N2	wt	11.648	10.977	5.50523	1.85293	-3.6523	0	0.29777	0.551746	-1.08755
0000017_14.tif	control	N2	wt	11.589	10.832	5.50523	1.97753	-3.5277	0	0.29777	0.58885	-1.05044
0000017_14.tif	control	N2	wt	11.87	10.734	5.50523	1.80614	-3.69909	0	0.29777	0.537814	-1.10148
0000017_14.tif	control	N2	wt	12.363	10.439	5.50523	1.70056	-3.80467	0	0.29777	0.506374	-1.13292
0000017_14.tif	control	N2	wt	12.526	10.446	5.50523	1.61368	-3.89155	0	0.29777	0.480505	-1.15879
0000017_14.tif	control	N2	wt	12.477	10.908	5.50523	1.25192	-4.25331	0	0.29777	0.372784	-1.26651
0000017_14.tif	control	N2	wt	12.641	10.849	5.50523	1.20565	-4.29958	0	0.29777	0.359006	-1.28029
0000017_14.tif	control	N2	wt	12.745	10.609	5.50523	1.37364	-4.13159	0	0.29777	0.409028	-1.23026
0000017_14.tif	control	N2	wt	12.786	10.255	5.50523	1.69441	-3.81082	0	0.29777	0.504544	-1.13475
0000017_14.tif	control	N2	wt	13.078	10.78	5.50523	1.11595	-4.38928	0	0.29777	0.332296	-1.307
0000017_14.tif	control	N2	wt	13.075	10.967	5.50523	0.932765	-4.57247	0	0.29777	0.277749	-1.36154
0000017_14.tif	control	N2	wt	13.224	11.047	5.50523	0.834058	-4.67117	0	0.29777	0.248357	-1.39093
0000017_14.tif	control	N2	wt	13.116	11.335	5.50523	0.565265	-4.93996	0	0.29777	0.168319	-1.47097
0000017_14.tif	control	N2	wt	13.009	11.38	5.50523	0.562182	-4.94305	0	0.29777	0.167401	-1.47189
0000017_14.tif	control	N2	wt	12.328	11.839	5.50523	0.938896	-4.56633	0	0.29777	0.279575	-1.35972
0000017_14.tif	control	N2	wt	12.46	11.866	5.50523	0.806122	-4.69911	0	0.29777	0.240039	-1.39925
0000017_14.tif	control	N2	wt	12.248	12.304	5.50523	1.10277	-4.40246	0	0.29777	0.328372	-1.31092
0000017_14.tif	control	N2	wt	12.72	12.22	5.50523	0.643208	-4.86202	0	0.29777	0.191528	-1.44776
0000017_14.tif	control	N2	wt	12.786	12.075	5.50523	0.518097	-4.98713	0	0.29777	0.154274	-1.48502
0000017_14.tif	control	N2	wt	12.807	11.939	5.50523	0.462776	-5.04245	0	0.29777	0.137801	-1.50149
0000017_14.tif	control	N2	wt	12.936	12.266	5.50523	0.507835	-4.9974	0	0.29777	0.151218	-1.48807
0000017_14.tif	control	N2	wt	13.019	12.189	5.50523	0.395588	-5.10964	0	0.29777	0.117794	-1.5215
0000017_14.tif	control	N2	wt	13.089	12.102	5.50523	0.283924	-5.22131	0	0.29777	0.0845441	-1.55475
0000017_14.tif	control	N2	wt	13.092	12.366	5.50523	0.516209	-4.98902	0	0.29777	0.153712	-1.48558
0000017_14.tif	control	N2	wt	13.266	12.627	5.50523	0.747	-4.75823	0	0.29777	0.222434	-1.41686
0000017_14.tif	control	N2	wt	13.248	12.786	5.50523	0.906179	-4.59905	0	0.29777	0.269833	-1.36946
0000017_14.tif	control	N2	wt	10.748	12.293	5.50523	2.55165	-2.95358	0	0.29777	0.759803	-0.879489
0000017_14.tif	control	N2	wt	10.884	12.29	5.50523	2.41703	-3.0882	0	0.29777	0.719718	-0.919574
0000017_14.tif	control	N2	wt	10.97	12.356	5.50523	2.34482	-3.16041	0	0.29777	0.698218	-0.941075
0000017_14.tif	control	N2	wt	12.026	12.898	5.50523	1.60435	-3.90088	0	0.29777	0.477726	-1.16157
0000017_14.tif	control	N2	wt	11.95	13.023	5.50523	1.74307	-3.76216	0	0.29777	0.519035	-1.12026
0000017_14.tif	control	N2	wt	12.151	13.227	5.50523	1.74861	-3.75662	0	0.29777	0.520683	-1.11861
0000017_14.tif	control	N2	wt	12.856	13.345	5.50523	1.52129	-3.98394	0	0.29777	0.452995	-1.1863
0000017_14.tif	control	N2	wt	12.842	13.516	5.50523	1.69005	-3.81518	0	0.29777	0.503246	-1.13605
0000017_14.tif	control	N2	wt	12.929	13.602	5.50523	1.75467	-3.75056	0	0.29777	0.522487	-1.11681
0000017_14.tif	control	N2	wt	13.304	13.335	5.50523	1.4555	-4.04973	0	0.29777	0.433403	-1.20589
0000017_14.tif	control	N2	wt	11.852	13.894	5.50523	2.46081	-3.04442	0	0.29777	0.732756	-0.906537
0000017_14.tif	control	N2	wt	11.95	13.856	5.50523	2.37412	-3.13111	0	0.29777	0.706941	-0.932351
0000017_14.tif	control	N2	wt	12.203	14.009	5.50523	2.37962	-3.12561	0	0.29777	0.708581	-0.930712
0000017_14.tif	control	N2	wt	12.366	13.96	5.50523	2.26636	-3.23887	0	0.29777	0.674855	-0.964438
0000017_14.tif	control	N2	wt	12.661	14.217	5.50523	2.41404	-3.09119	0	0.29777	0.718829	-0.920463
0000017_14.tif	control	N2	wt	12.741	14.099	5.50523	2.28026	-3.22497	0	0.29777	0.678993	-0.960299
0000017_14.tif	control	N2	wt	12.873	14.189	5.50523	2.34221	-3.16302	0	0.29777	0.697439	-0.941854
0000017_14.tif	control	N2	wt	12.905	14.245	5.50523	2.39239	-3.11284	0	0.29777	0.712383	-0.926909
0000017_14.tif	control	N2	wt	12.974	14.401	5.50523	2.53785	-2.96738	0	0.29777	0.755697	-0.883595
0000017_14.tif	control	N2	wt	13.082	14.064	5.50523	2.19174	-3.31349	0	0.29777	0.652634	-0.986659
0000017_14.tif	control	N2	wt	13.196	15.248	5.50523	3.36873	-2.1365	0	0.29777	1.00311	-0.636186
0000017_14.tif	control	N2	wt	13.168	15.616	5.50523	3.73729	-1.76794	0	0.29777	1.11285	-0.526441
0000017_14.tif	control	N2	wt	13.172	15.71	5.50523	3.83115	-1.67408	0	0.29777	1.1408	-0.49849
0000017_14.tif	control	N2	wt	10.422	16.071	5.50523	5.06486	-0.440369	0	0.29777	1.50816	-0.131129
0000017_14.tif	control	N2	wt	10.53	16.123	5.50523	5.04864	-0.456592	0	0.29777	1.50333	-0.135959
0000017_14.tif	control	N2	wt	10.773	16.283	5.50523	5.05979	-0.445442	0	0.29777	1.50665	-0.132639
0000017_14.tif	control	N2	wt	10.863	16.141	5.50523	4.89188	-0.613346	0	0.29777	1.45666	-0.182636
0000017_14.tif	control	N2	wt	10.901	16.332	5.50523	5.04118	-0.464047	0	0.29777	1.50111	-0.138179
0000017_14.tif	control	N2	wt	11.203	16.21	5.50523	4.79634	-0.708891	0	0.29777	1.42821	-0.211086
0000017_14.tif	control	N2	wt	14.964	16.661	5.50523	5.07358	-0.431655	0	0.29777	1.51076	-0.128534
0000017_14.tif	control	N2	wt	15.835	16.418	5.50523	5.21471	-0.29052	0	0.29777	1.55278	-0.086508
0000017_14.tif	control	N2	wt	16.009	16.293	5.50523	5.19602	-0.309211	0	0.29777	1.54722	-0.0920736
0000017_14.tif	control	N2	wt	13.852	15.439	5.50523	3.60692	-1.89831	0	0.29777	1.07403	-0.56526
0000017_14.tif	control	N2	wt	13.79	14.682	5.50523	2.85058	-2.65465	0	0.29777	0.848816	-0.790477
0000017_14.tif	control	N2	wt	13.72	14.613	5.50523	2.77045	-2.73478	0	0.29777	0.824958	-0.814335
0000017_14.tif	control	N2	wt	13.818	14.543	5.50523	2.71961	-2.78562	0	0.29777	0.809818	-0.829474
0000017_14.tif	control	N2	wt	13.95	14.658	5.50523	2.86097	-2.64426	0	0.29777	0.851911	-0.787382
0000017_14.tif	control	N2	wt	14.276	14.693	5.50523	2.98882	-2.51641	0	0.29777	0.889982	-0.74931
0000017_14.tif	control	N2	wt	13.589	13.734	5.50523	1.88193	-3.6233	0	0.29777	0.560381	-1.07891
0000017_14.tif	control	N2	wt	13.745	13.675	5.50523	1.85781	-3.64742	0	0.29777	0.553201	-1.08609
0000017_14.tif	control	N2	wt	13.523	13.502	5.50523	1.64223	-3.863	0	0.29777	0.489008	-1.15028
0000017_14.tif	control	N2	wt	13.748	13.443	5.50523	1.63563	-3.8696	0	0.29777	0.487042	-1.15225
0000017_14.tif	control	N2	wt	14.099	13.866	5.50523	2.15362	-3.35161	0	0.29777	0.641284	-0.998009
0000017_14.tif	control	N2	wt	14.193	13.717	5.50523	2.05764	-3.44759	0	0.29777	0.612705	-1.02659
0000017_14.tif	control	N2	wt	15.054	14.366	5.50523	3.06221	-2.44302	0	0.29777	0.911835	-0.727458
0000017_14.tif	control	N2	wt	15.116	14.366	5.50523	3.09882	-2.40641	0	0.29777	0.922736	-0.716556
0000017_14.tif	control	N2	wt	15.45	14.207	5.50523	3.19136	-2.31387	0	0.29777	0.950292	-0.689001
0000017_14.tif	control	N2	wt	15.464	14.113	5.50523	3.13329	-2.37194	0	0.29777	0.932999	-0.706293
0000017_14.tif	control	N2	wt	15.47	14.05	5.50523	3.09298	-2.41225	0	0.29777	0.920996	-0.718296
0000017_14.tif	control	N2	wt	13.62	12.943	5.50523	1.1204	-4.38483	0	0.29777	0.33362	-1.30567
0000017_14.tif	control	N2	wt	13.627	12.606	5.50523	0.8108	-4.69443	0	0.29777	0.241432	-1.39786
0000017_14.tif	control	N2	wt	13.47	12.276	5.50523	0.445457	-5.05977	0	0.29777	0.132644	-1.50665
0000017_14.tif	control	N2	wt	13.811	12.196	5.50523	0.629985	-4.87525	0	0.29777	0.187591	-1.4517
0000017_14.tif	control	N2	wt	13.839	11.842	5.50523	0.574259	-4.93097	0	0.29777	0.170997	-1.4683
0000017_14.tif	control	N2	wt	14.182	12.377	5.50523	1.04214	-4.46309	0	0.29777	0.310319	-1.32897
0000017_14.tif	control	N2	wt	14.189	12.502	5.50523	1.11302	-4.39221	0	0.29777	0.331424	-1.30787
0000017_14.tif	control	N2	wt	14.22	12.585	5.50523	1.18623	-4.319	0	0.29777	0.353224	-1.28607
0000017_14.tif	control	N2	wt	14.262	12.679	5.50523	1.27688	-4.22835	0	0.29777	0.380216	-1.25908
0000017_14.tif	control	N2	wt	14.425	12.832	5.50523	1.49986	-4.00537	0	0.29777	0.446614	-1.19268
0000017_14.tif	control	N2	wt	14.47	12.905	5.50523	1.58122	-3.92401	0	0.29777	0.470838	-1.16845
0000017_14.tif	control	N2	wt	14.606	13.016	5.50523	1.75673	-3.7485	0	0.29777	0.523101	-1.11619
0000017_14.tif	control	N2	wt	14.425	13.387	5.50523	1.90114	-3.60409	0	0.29777	0.566102	-1.07319
0000017_14.tif	control	N2	wt	14.523	13.366	5.50523	1.94634	-3.55889	0	0.29777	0.579562	-1.05973
0000017_14.tif	control	N2	wt	14.918	13.818	5.50523	2.54656	-2.95867	0	0.29777	0.758288	-0.881004
0000017_14.tif	control	N2	wt	14.925	13.731	5.50523	2.48566	-3.01957	0	0.29777	0.740154	-0.899139
0000017_14.tif	control	N2	wt	15.595	13.318	5.50523	2.73717	-2.76806	0	0.29777	0.815046	-0.824246
0000017_14.tif	control	N2	wt	15.766	13.203	5.50523	2.82849	-2.67674	0	0.29777	0.842238	-0.797054
0000017_14.tif	control	N2	wt	15.891	13.082	5.50523	2.88711	-2.61812	0	0.29777	0.859696	-0.779596
0000017_14.tif	control	N2	wt	15.345	12.55	5.50523	2.18429	-3.32094	0	0.29777	0.650417	-0.988875
0000017_14.tif	control	N2	wt	15.977	12.217	5.50523	2.73187	-2.77336	0	0.29777	0.813468	-0.825825
0000017_14.tif	control	N2	wt	15.832	12.13	5.50523	2.57815	-2.92708	0	0.29777	0.767696	-0.871597
0000017_14.tif	control	N2	wt	15.661	11.984	5.50523	2.39726	-3.10797	0	0.29777	0.713831	-0.925461
0000017_14.tif	control	N2	wt	15.658	11.755	5.50523	2.39526	-3.10997	0	0.29777	0.713238	-0.926055
0000017_14.tif	control	N2	wt	13.988	11.467	5.50523	0.831777	-4.67345	0	0.29777	0.247678	-1.39161
0000017_14.tif	control	N2	wt	14.043	10.974	5.50523	1.19355	-4.31168	0	0.29777	0.355404	-1.28389
0000017_14.tif	control	N2	wt	14.616	11.054	5.50523	1.58265	-3.92258	0	0.29777	0.471265	-1.16803
0000017_14.tif	control	N2	wt	14.922	11.061	5.50523	1.84746	-3.65777	0	0.29777	0.550117	-1.08918
0000017_14.tif	control	N2	wt	14.97	11.21	5.50523	1.83099	-3.67424	0	0.29777	0.545213	-1.09408
0000017_14.tif	control	N2	wt	15.092	11.144	5.50523	1.96875	-3.53648	0	0.29777	0.586234	-1.05306
0000017_14.tif	control	N2	wt	15.655	11.384	5.50523	2.43995	-3.06528	0	0.29777	0.726543	-0.91275
0000017_14.tif	control	N2	wt	15.63	11.234	5.50523	2.45068	-3.05455	0	0.29777	0.729738	-0.909555
0000017_14.tif	control	N2	wt	15.432	10.731	5.50523	2.45189	-3.05334	0	0.29777	0.730099	-0.909194
0000017_14.tif	control	N2	wt	15.964	10.384	5.50523	3.085	-2.42023	0	0.29777	0.91862	-0.720672
0000017_14.tif	control	N2	wt	15.828	10.304	5.50523	3.00793	-2.4973	0	0.29777	0.89567	-0.743622
0000017_14.tif	control	N2	wt	14.72	9.741	5.50523	2.58639	-2.91884	0	0.29777	0.770151	-0.869142
0000017_14.tif	control	N2	wt	13.957	9.259	5.50523	2.71056	-2.79467	0	0.29777	0.807123	-0.83217
0000017_14.tif	control	N2	wt	13.793	9.168	5.50523	2.76273	-2.7425	0	0.29777	0.822658	-0.816634
0000017_14.tif	control	N2	wt	14.523	8.339	5.50523	3.75749	-1.74774	0	0.29777	1.11887	-0.520425
0000017_14.tif	control	N2	wt	16.016	8.769	5.50523	4.15221	-1.35302	0	0.29777	1.2364	-0.40289
0000017_14.tif	control	N2	wt	16.217	8.845	5.50523	4.23316	-1.27207	0	0.29777	1.26051	-0.378785
0000017_14.tif	control	N2	wt	16.224	8.79	5.50523	4.2776	-1.22763	0	0.29777	1.27374	-0.365551
0000017_14.tif	control	N2	wt	16.28	8.675	5.50523	4.39957	-1.10566	0	0.29777	1.31006	-0.329232
0000017_14.tif	control	N2	wt	16.05	8.356	5.50523	4.49102	-1.01421	0	0.29777	1.33729	-0.302002
0000017_14.tif	control	N2	wt	14.217	7.2	5.50523	4.77565	-0.729583	0	0.29777	1.42204	-0.217248
0000017_14.tif	control	N2	wt	14.026	7.102	5.50523	4.83807	-0.667164	0	0.29777	1.44063	-0.198661
0000017_14.tif	control	N2	wt	16.359	9.637	5.50523	3.82069	-1.68454	0	0.29777	1.13769	-0.501604
0000017_14.tif	control	N2	wt	16.682	9.863	5.50523	3.96703	-1.5382	0	0.29777	1.18126	-0.458029
0000017_14.tif	control	N2	wt	16.377	10.377	5.50523	3.45504	-2.05019	0	0.29777	1.02881	-0.610484
0000017_14.tif	control	N2	wt	16.752	10.953	5.50523	3.60715	-1.89808	0	0.29777	1.0741	-0.565192
0000017_14.tif	control	N2	wt	17.155	10.446	5.50523	4.14496	-1.36027	0	0.29777	1.23424	-0.405048
0000017_14.tif	control	N2	wt	17.286	10.071	5.50523	4.40827	-1.09696	0	0.29777	1.31265	-0.326641
0000017_14.tif	control	N2	wt	17.568	10.582	5.50523	4.49355	-1.01168	0	0.29777	1.33804	-0.301247
0000017_14.tif	control	N2	wt	17.818	10.849	5.50523	4.6673	-0.837933	0	0.29777	1.38978	-0.249511
0000017_14.tif	control	N2	wt	18.064	10.717	5.50523	4.93694	-0.56829	0	0.29777	1.47007	-0.16922
0000017_14.tif	control	N2	wt	17.797	11.335	5.50523	4.56366	-0.941571	0	0.29777	1.35892	-0.280372
0000017_14.tif	control	N2	wt	17.905	11.384	5.50523	4.66544	-0.839789	0	0.29777	1.38923	-0.250064
0000017_14.tif	control	N2	wt	18.773	11.363	5.50523	5.53121	0.0259849	1	0.29777	1.64703	0.00773751
0000017_14.tif	control	N2	wt	19.075	11.068	5.50523	5.86548	0.360247	1	0.29777	1.74656	0.107271
0000017_14.tif	control	N2	wt	19.175	11.203	5.50523	5.94766	0.442426	1	0.29777	1.77103	0.131741
0000017_14.tif	control	N2	wt	18.95	10.821	5.50523	5.78181	0.276581	1	0.29777	1.72165	0.0823575
0000017_14.tif	control	N2	wt	16.97	11.707	5.50523	3.70804	-1.79719	0	0.29777	1.10414	-0.53515
0000017_14.tif	control	N2	wt	16.432	12.766	5.50523	3.28764	-2.21759	0	0.29777	0.978959	-0.660333
0000017_14.tif	control	N2	wt	16.436	12.856	5.50523	3.31685	-2.18838	0	0.29777	0.987658	-0.651635
0000017_14.tif	control	N2	wt	16.783	13.102	5.50523	3.72325	-1.78198	0	0.29777	1.10867	-0.530621
0000017_14.tif	control	N2	wt	16.71	12.839	5.50523	3.57503	-1.9302	0	0.29777	1.06454	-0.574757
0000017_14.tif	control	N2	wt	16.981	12.898	5.50523	3.85195	-1.65328	0	0.29777	1.147	-0.492296
0000017_14.tif	control	N2	wt	17.12	12.693	5.50523	3.93882	-1.56641	0	0.29777	1.17286	-0.466431
0000017_14.tif	control	N2	wt	17.269	12.609	5.50523	4.06884	-1.43639	0	0.29777	1.21158	-0.427714
0000017_14.tif	control	N2	wt	17.578	12.821	5.50523	4.41348	-1.09175	0	0.29777	1.3142	-0.32509
0000017_14.tif	control	N2	wt	17.644	12.984	5.50523	4.51505	-0.990177	0	0.29777	1.34445	-0.294845
0000017_14.tif	control	N2	wt	17.8	12.766	5.50523	4.61976	-0.885473	0	0.29777	1.37562	-0.263667
0000017_14.tif	control	N2	wt	17.957	12.283	5.50523	4.70828	-0.796951	0	0.29777	1.40198	-0.237308
0000017_14.tif	control	N2	wt	17.984	12.2	5.50523	4.72884	-0.77639	0	0.29777	1.40811	-0.231186
0000017_14.tif	control	N2	wt	18.082	12.595	5.50523	4.86879	-0.636444	0	0.29777	1.44978	-0.189514
0000017_14.tif	control	N2	wt	18.217	12.62	5.50523	5.006	-0.499234	0	0.29777	1.49064	-0.148657
0000017_14.tif	control	N2	wt	18.352	12.474	5.50523	5.12057	-0.384661	0	0.29777	1.52475	-0.11454
0000017_14.tif	control	N2	wt	18.262	12.13	5.50523	5.00225	-0.502979	0	0.29777	1.48952	-0.149772
0000017_14.tif	control	N2	wt	18.502	12.22	5.50523	5.24703	-0.258203	0	0.29777	1.56241	-0.076885
0000017_14.tif	control	N2	wt	18.536	11.898	5.50523	5.27003	-0.235199	0	0.29777	1.56926	-0.0700353
0000017_14.tif	control	N2	wt	18.644	13.036	5.50523	5.50084	-0.0043919	0	0.29777	1.63798	-0.00130777
0000017_14.tif	control	N2	wt	17.498	13.717	5.50523	4.6135	-0.891729	0	0.29777	1.37376	-0.26553
0000017_14.tif	control	N2	wt	17.439	14.05	5.50523	4.70349	-0.801739	0	0.29777	1.40056	-0.238734
0000017_14.tif	control	N2	wt	17.828	15.078	5.50523	5.57127	0.0660399	1	0.29777	1.65896	0.0196647
0000017_14.tif	control	N2	wt	17.266	15.241	5.50523	5.22459	-0.280642	0	0.29777	1.55573	-0.0835667
0000017_14.tif	control	N2	wt	17.512	15.345	5.50523	5.4804	-0.024834	0	0.29777	1.6319	-0.00739481
0000017_14.tif	control	N2	wt	17.62	15.394	5.50523	5.59513	0.0899029	1	0.29777	1.66606	0.0267704
0000017_16.tif	predator	N2	wt	6.578	9.078	5.56255	8.62128	3.05873	1	0.29777	2.56716	0.910797
0000017_16.tif	predator	N2	wt	7.641	9.943	5.56255	7.29296	1.73041	1	0.29777	2.17162	0.515263
0000017_16.tif	predator	N2	wt	6.135	10.354	5.56255	8.56437	3.00182	1	0.29777	2.55021	0.893853
0000017_16.tif	predator	N2	wt	5.948	10.427	5.56255	8.72264	3.16009	1	0.29777	2.59734	0.940981
0000017_16.tif	predator	N2	wt	4.406	10.885	5.56255	10.1127	4.55018	1	0.29777	3.01127	1.35491
0000017_16.tif	predator	N2	wt	4.349	10.839	5.56255	10.1777	4.61514	1	0.29777	3.03061	1.37425
0000017_16.tif	predator	N2	wt	5.068	13.958	5.56255	9.31932	3.75677	1	0.29777	2.77501	1.11865
0000017_16.tif	predator	N2	wt	4.984	14.12	5.56255	9.42295	3.8604	1	0.29777	2.80587	1.14951
0000017_16.tif	predator	N2	wt	5.094	14.104	5.56255	9.3118	3.74925	1	0.29777	2.77277	1.11641
0000017_16.tif	predator	N2	wt	6.708	15.766	5.56255	8.14887	2.58632	1	0.29777	2.42649	0.770128
0000017_16.tif	predator	N2	wt	6.63	17.349	5.56255	8.90441	3.34186	1	0.29777	2.65147	0.995106
0000017_16.tif	predator	N2	wt	9.609	20.297	5.56255	8.80093	3.23838	1	0.29777	2.62065	0.964294
0000017_16.tif	predator	N2	wt	9.729	20.099	5.56255	8.56946	3.00691	1	0.29777	2.55173	0.895367
0000017_16.tif	predator	N2	wt	10.089	19.932	5.56255	8.23828	2.67573	1	0.29777	2.45311	0.796752
0000017_16.tif	predator	N2	wt	8.609	16.224	5.56255	6.62817	1.06562	1	0.29777	1.97367	0.317311
0000017_16.tif	predator	N2	wt	8.672	15.807	5.56255	6.37096	0.808414	1	0.29777	1.89708	0.240721
0000017_16.tif	predator	N2	wt	9.448	14.245	5.56255	5.06656	-0.495989	0	0.29777	1.50867	-0.147691
0000017_16.tif	predator	N2	wt	9.271	10.505	5.56255	5.57605	0.0134985	1	0.29777	1.66038	0.00401946
0000017_16.tif	predator	N2	wt	8.776	9.406	5.56255	6.53712	0.974568	1	0.29777	1.94656	0.290197
0000017_16.tif	predator	N2	wt	8.974	8.917	5.56255	6.6482	1.08565	1	0.29777	1.97963	0.323273
0000017_16.tif	predator	N2	wt	9.073	5.75	5.56255	8.84227	3.27972	1	0.29777	2.63296	0.976602
0000017_16.tif	predator	N2	wt	9.052	5.276	5.56255	9.23993	3.67738	1	0.29777	2.75137	1.09501
0000017_16.tif	predator	N2	wt	9.021	5.161	5.56255	9.35216	3.78961	1	0.29777	2.78479	1.12843
0000017_16.tif	predator	N2	wt	9.521	6.359	5.56255	8.08624	2.52369	1	0.29777	2.40784	0.751479
0000017_16.tif	predator	N2	wt	9.885	6.203	5.56255	8.00488	2.44233	1	0.29777	2.38361	0.727253
0000017_16.tif	predator	N2	wt	9.797	6.568	5.56255	7.7548	2.19225	1	0.29777	2.30915	0.652786
0000017_16.tif	predator	N2	wt	10.198	5.599	5.56255	8.35526	2.79271	1	0.29777	2.48795	0.831586
0000017_16.tif	predator	N2	wt	10.052	5.635	5.56255	8.39728	2.83473	1	0.29777	2.50046	0.844098
0000017_16.tif	predator	N2	wt	10.073	5.495	5.56255	8.50761	2.94506	1	0.29777	2.53331	0.87695
0000017_16.tif	predator	N2	wt	10.188	3.568	5.56255	10.1751	4.61254	1	0.29777	3.02984	1.37348
0000017_16.tif	predator	N2	wt	9.896	3.25	5.56255	10.5852	5.02266	1	0.29777	3.15196	1.4956
0000017_16.tif	predator	N2	wt	9.589	3.182	5.56255	10.7783	5.21573	1	0.29777	3.20945	1.55309
0000017_16.tif	predator	N2	wt	9.339	3.266	5.56255	10.8158	5.25323	1	0.29777	3.22061	1.56425
0000017_16.tif	predator	N2	wt	12.292	2.948	5.56255	10.1228	4.56029	1	0.29777	3.01428	1.35792
0000017_16.tif	predator	N2	wt	14.359	4.141	5.56255	8.72407	3.16153	1	0.29777	2.59777	0.941407
0000017_16.tif	predator	N2	wt	14.536	4.036	5.56255	8.83157	3.26902	1	0.29777	2.62978	0.973416
0000017_16.tif	predator	N2	wt	14.995	4.203	5.56255	8.68803	3.12548	1	0.29777	2.58703	0.930674
0000017_16.tif	predator	N2	wt	15.167	4.234	5.56255	8.67217	3.10962	1	0.29777	2.58231	0.925951
0000017_16.tif	predator	N2	wt	10.99	4.526	5.56255	8.98041	3.41786	1	0.29777	2.6741	1.01774
0000017_16.tif	predator	N2	wt	10.932	4.609	5.56255	8.92527	3.36272	1	0.29777	2.65768	1.00132
0000017_16.tif	predator	N2	wt	10.708	4.724	5.56255	8.90753	3.34498	1	0.29777	2.6524	0.996035
0000017_16.tif	predator	N2	wt	10.583	5.391	5.56255	8.35753	2.79498	1	0.29777	2.48862	0.832261
0000017_16.tif	predator	N2	wt	10.5	5.474	5.56255	8.32119	2.75864	1	0.29777	2.4778	0.821441
0000017_16.tif	predator	N2	wt	11.214	5.922	5.56255	7.60731	2.04476	1	0.29777	2.26523	0.608868
0000017_16.tif	predator	N2	wt	12.953	7.927	5.56255	5.12452	-0.438025	0	0.29777	1.52593	-0.130431
0000017_16.tif	predator	N2	wt	13.25	7.724	5.56255	5.25178	-0.310767	0	0.29777	1.56382	-0.0925371
0000017_16.tif	predator	N2	wt	14.63	7.729	5.56255	5.14517	-0.417382	0	0.29777	1.53208	-0.124284
0000017_16.tif	predator	N2	wt	14.75	7.88	5.56255	5.00325	-0.559294	0	0.29777	1.48982	-0.166541
0000017_16.tif	predator	N2	wt	14.88	7.521	5.56255	5.37295	-0.189599	0	0.29777	1.5999	-0.056457
0000017_16.tif	predator	N2	wt	14.922	7.516	5.56255	5.38243	-0.180114	0	0.29777	1.60273	-0.0536326
0000017_16.tif	predator	N2	wt	15.25	7.651	5.56255	5.29576	-0.266784	0	0.29777	1.57692	-0.0794403
0000017_16.tif	predator	N2	wt	15.786	7.917	5.56255	5.15976	-0.402794	0	0.29777	1.53642	-0.11994
0000017_16.tif	predator	N2	wt	15.833	8.531	5.56255	4.58952	-0.973033	0	0.29777	1.36662	-0.28974
0000017_16.tif	predator	N2	wt	15.109	10.266	5.56255	2.71525	-2.8473	0	0.29777	0.808521	-0.847839
0000017_16.tif	predator	N2	wt	15.245	10.307	5.56255	2.71909	-2.84346	0	0.29777	0.809663	-0.846697
0000017_16.tif	predator	N2	wt	15.276	10.448	5.56255	2.5981	-2.96445	0	0.29777	0.773635	-0.882725
0000017_16.tif	predator	N2	wt	15.188	12.865	5.56255	0.865	-4.69755	0	0.29777	0.257571	-1.39879
0000017_16.tif	predator	N2	wt	15.354	13.005	5.56255	1.04046	-4.52209	0	0.29777	0.309818	-1.34654
0000017_16.tif	predator	N2	wt	10.693	17.125	5.56255	5.59683	0.0342807	1	0.29777	1.66657	0.0102078
0000017_16.tif	predator	N2	wt	10.771	17.208	5.56255	5.61056	0.0480085	1	0.29777	1.67066	0.0142955
0000017_16.tif	predator	N2	wt	12.547	19.203	5.56255	6.58213	1.01958	1	0.29777	1.95996	0.3036
0000017_16.tif	predator	N2	wt	10.531	20.297	5.56255	8.34349	2.78094	1	0.29777	2.48444	0.828082
0000017_16.tif	predator	N2	wt	10.651	20.292	5.56255	8.28516	2.72261	1	0.29777	2.46707	0.810713
0000017_16.tif	predator	N2	wt	10.745	20.443	5.56255	8.38022	2.81768	1	0.29777	2.49538	0.839019
0000017_16.tif	predator	N2	wt	10.792	20.578	5.56255	8.48283	2.92028	1	0.29777	2.52593	0.869571
0000017_16.tif	predator	N2	wt	10.859	20.526	5.56255	8.40775	2.8452	1	0.29777	2.50357	0.847215
0000017_16.tif	predator	N2	wt	10.932	21.469	5.56255	9.24812	3.68557	1	0.29777	2.75381	1.09745
0000017_16.tif	predator	N2	wt	11.344	21.5	5.56255	9.13442	3.57187	1	0.29777	2.71996	1.0636
0000017_16.tif	predator	N2	wt	12.964	20.453	5.56255	7.70874	2.14619	1	0.29777	2.29543	0.63907
0000017_16.tif	predator	N2	wt	12.87	19.635	5.56255	6.92417	1.36162	1	0.29777	2.06181	0.405449
0000017_16.tif	predator	N2	wt	19.651	19.042	5.56255	8.15738	2.59484	1	0.29777	2.42902	0.772664
0000017_16.tif	predator	N2	wt	19.745	18.979	5.56255	8.17185	2.6093	1	0.29777	2.43333	0.776971
0000017_16.tif	predator	N2	wt	17.646	13.51	5.56255	3.38502	-2.17753	0	0.29777	1.00796	-0.648403
0000017_16.tif	predator	N2	wt	17.495	11.844	5.56255	3.33227	-2.23028	0	0.29777	0.99225	-0.66411
0000017_16.tif	predator	N2	wt	18.443	10.177	5.56255	4.91932	-0.643225	0	0.29777	1.46483	-0.191533
0000017_16.tif	predator	N2	wt	18.224	9.995	5.56255	4.84301	-0.719543	0	0.29777	1.4421	-0.214258
0000017_16.tif	predator	N2	wt	20.177	9.208	5.56255	6.90239	1.33984	1	0.29777	2.05532	0.398964
0000017_16.tif	predator	N2	wt	20.26	9.146	5.56255	7.00564	1.44309	1	0.29777	2.08607	0.429708
0000017_16.tif	predator	N2	wt	20.323	7	5.56255	8.39037	2.82782	1	0.29777	2.4984	0.842039
0000017_16.tif	predator	N2	wt	20.344	6.807	5.56255	8.54118	2.97863	1	0.29777	2.54331	0.886948
0000017_16.tif	predator	N2	wt	17.578	5.76	5.56255	7.81512	2.25257	1	0.29777	2.32711	0.670747
0000017_16.tif	predator	N2	wt	17.76	5.745	5.56255	7.90616	2.34361	1	0.29777	2.35422	0.697857
0000017_16.tif	predator	N2	wt	19.964	5.083	5.56255	9.61147	4.04892	1	0.29777	2.86201	1.20565
0000017_16.tif	predator	N2	wt	20.016	5	5.56255	9.7092	4.14665	1	0.29777	2.89111	1.23475
0000017_16.tif	predator	N2	wt	17.562	3.01	5.56255	10.3736	4.81108	1	0.29777	3.08896	1.43259
0000017_16.tif	predator	N2	wt	20.714	4.161	5.56255	10.7984	5.23581	1	0.29777	3.21543	1.55907
0000017_16.tif	predator	N2	wt	20.833	4.349	5.56255	10.7193	5.1567	1	0.29777	3.19187	1.53551
0000017_16.tif	predator	N2	wt	21.104	5.182	5.56255	10.2475	4.68491	1	0.29777	3.05139	1.39503
0000017_16.tif	predator	N2	wt	21.167	9.135	5.56255	7.79444	2.23189	1	0.29777	2.32095	0.664589
0000017_16.tif	predator	N2	wt	23.323	9.583	5.56255	9.57975	4.0172	1	0.29777	2.85256	1.1962
0000017_16.tif	predator	N2	wt	21.625	10.469	5.56255	7.68505	2.1225	1	0.29777	2.28838	0.632018
0000017_16.tif	predator	N2	wt	22.823	12.344	5.56255	8.51595	2.9534	1	0.29777	2.5358	0.879435
0000017_16.tif	predator	N2	wt	23.214	13.099	5.56255	8.89408	3.33153	1	0.29777	2.64839	0.99203
0000017_16.tif	predator	N2	wt	20.802	18.729	5.56255	8.73865	3.1761	1	0.29777	2.60211	0.945747
0000017_16.tif	predator	N2	wt	20.76	18.833	5.56255	8.77793	3.21538	1	0.29777	2.6138	0.957443
0000017_16.tif	predator	N2	wt	20.573	18.99	5.56255	8.75089	3.18834	1	0.29777	2.60575	0.949393
00000001_3.tif	control	CB1112	cat2(e1112)	12.417	14.854	6.09915	5.2982	-0.800948	0	0.29777	1.57764	-0.238498
00000001_3.tif	control	CB1112	cat2(e1112)	12.911	14.682	6.09915	4.89914	-1.20001	0	0.29777	1.45882	-0.357327
00000001_3.tif	control	CB1112	cat2(e1112)	13.932	14.988	6.09915	4.79416	-1.30499	0	0.29777	1.42756	-0.388585
00000001_3.tif	control	CB1112	cat2(e1112)	14.036	14.786	6.09915	4.57152	-1.52763	0	0.29777	1.36126	-0.454882
00000001_3.tif	control	CB1112	cat2(e1112)	14.53	14.46	6.09915	4.14391	-1.95523	0	0.29777	1.23393	-0.58221
00000001_3.tif	control	CB1112	cat2(e1112)	13.682	14.168	6.09915	4.10162	-1.99753	0	0.29777	1.22134	-0.594804
00000001_3.tif	control	CB1112	cat2(e1112)	11.925	13.738	6.09915	4.72917	-1.36998	0	0.29777	1.40821	-0.407938
00000001_3.tif	control	CB1112	cat2(e1112)	12.106	13.557	6.09915	4.4732	-1.62595	0	0.29777	1.33199	-0.484158
00000001_3.tif	control	CB1112	cat2(e1112)	12.266	13.641	6.09915	4.4236	-1.67555	0	0.29777	1.31722	-0.498928
00000001_3.tif	control	CB1112	cat2(e1112)	12.495	13.481	6.09915	4.15136	-1.94779	0	0.29777	1.23615	-0.579992
00000001_3.tif	control	CB1112	cat2(e1112)	12.321	13.356	6.09915	4.17911	-1.92004	0	0.29777	1.24441	-0.571731
00000001_3.tif	control	CB1112	cat2(e1112)	12.217	13.148	6.09915	4.1099	-1.98925	0	0.29777	1.2238	-0.592339
00000001_3.tif	control	CB1112	cat2(e1112)	12.467	13.21	6.09915	3.97264	-2.12651	0	0.29777	1.18293	-0.633211
00000001_3.tif	control	CB1112	cat2(e1112)	12.738	13.696	6.09915	4.16307	-1.93608	0	0.29777	1.23964	-0.576506
00000001_3.tif	control	CB1112	cat2(e1112)	12.856	12.981	6.09915	3.53842	-2.56073	0	0.29777	1.05363	-0.762508
00000001_3.tif	control	CB1112	cat2(e1112)	14.453	12.977	6.09915	2.71802	-3.38113	0	0.29777	0.809344	-1.0068
00000001_3.tif	control	CB1112	cat2(e1112)	14.634	12.623	6.09915	2.32738	-3.77177	0	0.29777	0.693023	-1.12312
00000001_3.tif	control	CB1112	cat2(e1112)	15.002	12.401	6.09915	2.03677	-4.06237	0	0.29777	0.60649	-1.20965
00000001_3.tif	control	CB1112	cat2(e1112)	15.314	12.214	6.09915	1.83495	-4.2642	0	0.29777	0.546393	-1.26975
00000001_3.tif	control	CB1112	cat2(e1112)	15.342	12.151	6.09915	1.77314	-4.32601	0	0.29777	0.527987	-1.28816
00000001_3.tif	control	CB1112	cat2(e1112)	12.543	12.693	6.09915	3.5644	-2.53475	0	0.29777	1.06137	-0.754773
00000001_3.tif	control	CB1112	cat2(e1112)	12.113	12.741	6.09915	3.9302	-2.16895	0	0.29777	1.1703	-0.645847
00000001_3.tif	control	CB1112	cat2(e1112)	11.314	11.814	6.09915	4.19379	-1.90536	0	0.29777	1.24878	-0.56736
00000001_3.tif	control	CB1112	cat2(e1112)	11.564	12.016	6.09915	4.03732	-2.06182	0	0.29777	1.20219	-0.61395
00000001_3.tif	control	CB1112	cat2(e1112)	10.939	10.988	6.09915	4.35861	-1.74053	0	0.29777	1.29786	-0.518279
00000001_3.tif	control	CB1112	cat2(e1112)	11.293	10.925	6.09915	3.99931	-2.09984	0	0.29777	1.19087	-0.625269
00000001_3.tif	control	CB1112	cat2(e1112)	11.46	10.821	6.09915	3.82054	-2.27861	0	0.29777	1.13764	-0.678502
00000001_3.tif	control	CB1112	cat2(e1112)	11.745	10.564	6.09915	3.51482	-2.58433	0	0.29777	1.04661	-0.769535
00000001_3.tif	control	CB1112	cat2(e1112)	11.891	11.405	6.09915	3.51669	-2.58246	0	0.29777	1.04717	-0.768978
00000001_3.tif	control	CB1112	cat2(e1112)	12.273	11.807	6.09915	3.30585	-2.7933	0	0.29777	0.984383	-0.83176
00000001_3.tif	control	CB1112	cat2(e1112)	12.675	12.085	6.09915	3.09248	-3.00667	0	0.29777	0.920847	-0.895296
00000001_3.tif	control	CB1112	cat2(e1112)	12.488	11.398	6.09915	2.94832	-3.15082	0	0.29777	0.877922	-0.938221
00000001_3.tif	control	CB1112	cat2(e1112)	13.238	11.599	6.09915	2.35675	-3.7424	0	0.29777	0.701768	-1.11438
00000001_3.tif	control	CB1112	cat2(e1112)	12.995	11.231	6.09915	2.41491	-3.68424	0	0.29777	0.719088	-1.09705
00000001_3.tif	control	CB1112	cat2(e1112)	13.189	11.113	6.09915	2.19218	-3.90697	0	0.29777	0.652765	-1.16338
00000001_3.tif	control	CB1112	cat2(e1112)	12.87	10.995	6.09915	2.46302	-3.63613	0	0.29777	0.733412	-1.08273
00000001_3.tif	control	CB1112	cat2(e1112)	12.731	10.807	6.09915	2.55986	-3.53928	0	0.29777	0.762251	-1.05389
00000001_3.tif	control	CB1112	cat2(e1112)	11.057	9.686	6.09915	4.25498	-1.84417	0	0.29777	1.267	-0.549138
00000001_3.tif	control	CB1112	cat2(e1112)	11.877	9.477	6.09915	3.49661	-2.60254	0	0.29777	1.04119	-0.774957
00000001_3.tif	control	CB1112	cat2(e1112)	11.321	8.901	6.09915	4.20283	-1.89632	0	0.29777	1.25148	-0.564666
00000001_3.tif	control	CB1112	cat2(e1112)	12.384	10.477	6.09915	2.87264	-3.22651	0	0.29777	0.855385	-0.960758
00000001_3.tif	control	CB1112	cat2(e1112)	12.467	10.276	6.09915	2.78994	-3.30921	0	0.29777	0.83076	-0.985383
00000001_3.tif	control	CB1112	cat2(e1112)	12.516	9.422	6.09915	2.9017	-3.19744	0	0.29777	0.86404	-0.952103
00000001_3.tif	control	CB1112	cat2(e1112)	12.773	9.102	6.09915	2.7917	-3.30744	0	0.29777	0.831286	-0.984858
00000001_3.tif	control	CB1112	cat2(e1112)	13.099	10.241	6.09915	2.16048	-3.93867	0	0.29777	0.643325	-1.17282
00000001_3.tif	control	CB1112	cat2(e1112)	13.585	10.658	6.09915	1.69298	-4.40617	0	0.29777	0.504119	-1.31202
00000001_3.tif	control	CB1112	cat2(e1112)	14.8	10.429	6.09915	0.457631	-5.64152	0	0.29777	0.136269	-1.67987
00000001_3.tif	control	CB1112	cat2(e1112)	14.377	9.79	6.09915	1.05782	-5.04133	0	0.29777	0.314987	-1.50116
00000001_3.tif	control	CB1112	cat2(e1112)	14.516	9.582	6.09915	1.08762	-5.01152	0	0.29777	0.323862	-1.49228
00000001_3.tif	control	CB1112	cat2(e1112)	14.509	9.45	6.09915	1.19223	-4.90692	0	0.29777	0.355011	-1.46113
00000001_3.tif	control	CB1112	cat2(e1112)	14.884	9.144	6.09915	1.29048	-4.80867	0	0.29777	0.384266	-1.43188
00000001_3.tif	control	CB1112	cat2(e1112)	14.981	9.095	6.09915	1.31389	-4.78526	0	0.29777	0.391236	-1.42491
00000001_3.tif	control	CB1112	cat2(e1112)	13.432	8.595	6.09915	2.55138	-3.54776	0	0.29777	0.759725	-1.05642
00000001_3.tif	control	CB1112	cat2(e1112)	14.238	7.526	6.09915	3.02979	-3.06936	0	0.29777	0.902179	-0.913964
00000001_3.tif	control	CB1112	cat2(e1112)	14.148	7.297	6.09915	3.27572	-2.82343	0	0.29777	0.975411	-0.840732
00000001_3.tif	control	CB1112	cat2(e1112)	14.106	7.248	6.09915	3.33611	-2.76304	0	0.29777	0.993393	-0.82275
00000001_3.tif	control	CB1112	cat2(e1112)	14.168	7.137	6.09915	3.42032	-2.67882	0	0.29777	1.01847	-0.797673
00000001_3.tif	control	CB1112	cat2(e1112)	15.106	7.429	6.09915	2.95476	-3.14439	0	0.29777	0.879839	-0.936305
00000001_3.tif	control	CB1112	cat2(e1112)	14.891	6.665	6.09915	3.73279	-2.36636	0	0.29777	1.11151	-0.70463
00000001_3.tif	control	CB1112	cat2(e1112)	14.307	6.464	6.09915	4.02911	-2.07003	0	0.29777	1.19975	-0.616394
00000001_3.tif	control	CB1112	cat2(e1112)	14.092	6.116	6.09915	4.41976	-1.67939	0	0.29777	1.31607	-0.500072
00000001_3.tif	control	CB1112	cat2(e1112)	15.286	5.797	6.09915	4.5831	-1.51604	0	0.29777	1.36471	-0.451432
00000001_3.tif	control	CB1112	cat2(e1112)	13.766	5.075	6.09915	5.51	-0.589144	0	0.29777	1.64071	-0.175429
00000001_3.tif	control	CB1112	cat2(e1112)	17.776	6.057	6.09915	5.00438	-1.09477	0	0.29777	1.49015	-0.32599
00000001_3.tif	control	CB1112	cat2(e1112)	16.151	6.675	6.09915	3.8118	-2.28734	0	0.29777	1.13504	-0.681103
00000001_3.tif	control	CB1112	cat2(e1112)	16.873	6.557	6.09915	4.1513	-1.94785	0	0.29777	1.23613	-0.580012
00000001_3.tif	control	CB1112	cat2(e1112)	17.894	6.655	6.09915	4.56508	-1.53407	0	0.29777	1.35934	-0.4568
00000001_3.tif	control	CB1112	cat2(e1112)	16.116	7.286	6.09915	3.21157	-2.88758	0	0.29777	0.956308	-0.859835
00000001_3.tif	control	CB1112	cat2(e1112)	16.075	7.398	6.09915	3.09269	-3.00646	0	0.29777	0.92091	-0.895233
00000001_3.tif	control	CB1112	cat2(e1112)	16.2	7.564	6.09915	2.97033	-3.12881	0	0.29777	0.884476	-0.931667
00000001_3.tif	control	CB1112	cat2(e1112)	17.345	7.661	6.09915	3.42944	-2.66971	0	0.29777	1.02118	-0.794959
00000001_3.tif	control	CB1112	cat2(e1112)	17.554	7.668	6.09915	3.55533	-2.54382	0	0.29777	1.05867	-0.757474
00000001_3.tif	control	CB1112	cat2(e1112)	15.45	8.057	6.09915	2.33117	-3.76798	0	0.29777	0.694153	-1.12199
00000001_3.tif	control	CB1112	cat2(e1112)	15.964	8.293	6.09915	2.20414	-3.895	0	0.29777	0.656328	-1.15982
00000001_3.tif	control	CB1112	cat2(e1112)	15.554	8.224	6.09915	2.17663	-3.92251	0	0.29777	0.648136	-1.16801
00000001_3.tif	control	CB1112	cat2(e1112)	17.547	8.182	6.09915	3.17561	-2.92354	0	0.29777	0.9456	-0.870543
00000001_3.tif	control	CB1112	cat2(e1112)	17.665	8.349	6.09915	3.15168	-2.94747	0	0.29777	0.938475	-0.877669
00000001_3.tif	control	CB1112	cat2(e1112)	17.29	8.793	6.09915	2.58066	-3.51849	0	0.29777	0.768442	-1.0477
00000001_3.tif	control	CB1112	cat2(e1112)	18.547	7.96	6.09915	4.08579	-2.01336	0	0.29777	1.21663	-0.599518
00000001_3.tif	control	CB1112	cat2(e1112)	19.089	8.509	6.09915	4.26617	-1.83298	0	0.29777	1.27034	-0.545806
00000001_3.tif	control	CB1112	cat2(e1112)	19.477	8.793	6.09915	4.51042	-1.58873	0	0.29777	1.34307	-0.473077
00000001_3.tif	control	CB1112	cat2(e1112)	15.498	8.8	6.09915	1.59858	-4.50057	0	0.29777	0.476008	-1.34013
00000001_3.tif	control	CB1112	cat2(e1112)	15.54	8.856	6.09915	1.55042	-4.54873	0	0.29777	0.461668	-1.35447
00000001_3.tif	control	CB1112	cat2(e1112)	16.734	9.064	6.09915	1.97972	-4.11943	0	0.29777	0.589502	-1.22664
00000001_3.tif	control	CB1112	cat2(e1112)	15.929	10.151	6.09915	0.711841	-5.38731	0	0.29777	0.211965	-1.60418
00000001_3.tif	control	CB1112	cat2(e1112)	15.609	10.776	6.09915	0.531161	-5.56799	0	0.29777	0.158164	-1.65798
00000001_3.tif	control	CB1112	cat2(e1112)	16.519	11.109	6.09915	1.45916	-4.63999	0	0.29777	0.434493	-1.38165
00000001_3.tif	control	CB1112	cat2(e1112)	16.512	11.2	6.09915	1.50082	-4.59833	0	0.29777	0.446898	-1.36925
00000001_3.tif	control	CB1112	cat2(e1112)	16.825	11.144	6.09915	1.74602	-4.35312	0	0.29777	0.519913	-1.29623
00000001_3.tif	control	CB1112	cat2(e1112)	17.082	10.852	6.09915	1.88699	-4.21216	0	0.29777	0.561888	-1.25426
00000001_3.tif	control	CB1112	cat2(e1112)	18.04	10.408	6.09915	2.78514	-3.31401	0	0.29777	0.829331	-0.986812
00000001_3.tif	control	CB1112	cat2(e1112)	18.255	9.734	6.09915	3.06876	-3.03038	0	0.29777	0.913786	-0.902357
00000001_3.tif	control	CB1112	cat2(e1112)	18.79	10.915	6.09915	3.57526	-2.52389	0	0.29777	1.0646	-0.751539
00000001_3.tif	control	CB1112	cat2(e1112)	19.116	11.352	6.09915	3.98147	-2.11768	0	0.29777	1.18556	-0.630581
00000001_3.tif	control	CB1112	cat2(e1112)	16.47	11.592	6.09915	1.71615	-4.383	0	0.29777	0.511018	-1.30513
00000001_3.tif	control	CB1112	cat2(e1112)	16.595	11.509	6.09915	1.75221	-4.34694	0	0.29777	0.521756	-1.29439
00000001_3.tif	control	CB1112	cat2(e1112)	15.616	11.717	6.09915	1.38488	-4.71427	0	0.29777	0.412375	-1.40377
00000001_3.tif	control	CB1112	cat2(e1112)	16.102	12.009	6.09915	1.83604	-4.26311	0	0.29777	0.546718	-1.26943
00000001_3.tif	control	CB1112	cat2(e1112)	16.165	12.134	6.09915	1.97601	-4.12314	0	0.29777	0.588397	-1.22775
00000001_3.tif	control	CB1112	cat2(e1112)	15.623	12.266	6.09915	1.92157	-4.17758	0	0.29777	0.572185	-1.24396
00000001_3.tif	control	CB1112	cat2(e1112)	16.755	11.898	6.09915	2.13409	-3.96506	0	0.29777	0.635467	-1.18068
00000001_3.tif	control	CB1112	cat2(e1112)	16.957	11.474	6.09915	2.02327	-4.07587	0	0.29777	0.60247	-1.21367
00000001_3.tif	control	CB1112	cat2(e1112)	16.436	12.37	6.09915	2.31406	-3.78509	0	0.29777	0.689057	-1.12709
00000001_3.tif	control	CB1112	cat2(e1112)	17.22	12.717	6.09915	3.05333	-3.04582	0	0.29777	0.909189	-0.906955
00000001_3.tif	control	CB1112	cat2(e1112)	18.095	11.891	6.09915	3.21694	-2.8822	0	0.29777	0.957909	-0.858234
00000001_3.tif	control	CB1112	cat2(e1112)	18.658	13.325	6.09915	4.50038	-1.59877	0	0.29777	1.34008	-0.476065
00000001_3.tif	control	CB1112	cat2(e1112)	18.137	12.929	6.09915	3.84751	-2.25164	0	0.29777	1.14567	-0.67047
00000001_3.tif	control	CB1112	cat2(e1112)	17.845	13.582	6.09915	4.11836	-1.98079	0	0.29777	1.22632	-0.589819
00000001_3.tif	control	CB1112	cat2(e1112)	16.575	13.7	6.09915	3.57279	-2.52636	0	0.29777	1.06387	-0.752275
00000001_3.tif	control	CB1112	cat2(e1112)	16.457	13.637	6.09915	3.47172	-2.62743	0	0.29777	1.03377	-0.782369
00000001_3.tif	control	CB1112	cat2(e1112)	15.957	13.47	6.09915	3.16874	-2.93041	0	0.29777	0.943555	-0.872588
00000001_3.tif	control	CB1112	cat2(e1112)	15.54	13.63	6.09915	3.26247	-2.83668	0	0.29777	0.971466	-0.844677
00000001_3.tif	control	CB1112	cat2(e1112)	15.512	13.693	6.09915	3.32295	-2.77619	0	0.29777	0.989476	-0.826667
00000001_5.tif	predator	CB1112	cat2(e1112)	10.312	18.812	5.7657	8.88533	3.11963	1	0.29777	2.64579	0.928933
00000001_5.tif	predator	CB1112	cat2(e1112)	14.075	20.759	5.7657	10.1005	4.33483	1	0.29777	3.00763	1.29078
00000001_5.tif	predator	CB1112	cat2(e1112)	13.387	15.936	5.7657	5.29519	-0.47051	0	0.29777	1.57675	-0.140104
00000001_5.tif	predator	CB1112	cat2(e1112)	13.366	15.832	5.7657	5.19351	-0.572194	0	0.29777	1.54647	-0.170382
00000001_5.tif	predator	CB1112	cat2(e1112)	13.429	15.589	5.7657	4.94587	-0.819838	0	0.29777	1.47273	-0.244123
00000001_5.tif	predator	CB1112	cat2(e1112)	10.922	15.095	5.7657	5.31297	-0.45273	0	0.29777	1.58204	-0.134809
00000001_5.tif	predator	CB1112	cat2(e1112)	11.04	14.998	5.7657	5.16721	-0.598494	0	0.29777	1.53864	-0.178213
00000001_5.tif	predator	CB1112	cat2(e1112)	11.373	13.71	5.7657	3.92772	-1.83798	0	0.29777	1.16956	-0.547296
00000001_5.tif	predator	CB1112	cat2(e1112)	9.352	12.87	5.7657	5.01026	-0.755444	0	0.29777	1.4919	-0.224949
00000001_5.tif	predator	CB1112	cat2(e1112)	11.873	11.974	5.7657	2.37246	-3.39325	0	0.29777	0.706446	-1.01041
00000001_5.tif	predator	CB1112	cat2(e1112)	11.762	11.96	5.7657	2.45825	-3.30746	0	0.29777	0.731992	-0.984862
00000001_5.tif	predator	CB1112	cat2(e1112)	11.13	10.54	5.7657	2.72169	-3.04401	0	0.29777	0.810438	-0.906415
00000001_5.tif	predator	CB1112	cat2(e1112)	11.026	10.491	5.7657	2.82811	-2.93759	0	0.29777	0.842128	-0.874726
00000001_5.tif	predator	CB1112	cat2(e1112)	9.352	11.804	5.7657	4.63998	-1.12572	0	0.29777	1.38165	-0.335205
00000001_5.tif	predator	CB1112	cat2(e1112)	10.825	8.325	5.7657	3.82119	-1.94452	0	0.29777	1.13783	-0.579018
00000001_5.tif	predator	CB1112	cat2(e1112)	11.415	8.422	5.7657	3.30719	-2.45852	0	0.29777	0.984781	-0.732073
00000001_5.tif	predator	CB1112	cat2(e1112)	13.832	6.863	5.7657	3.79804	-1.96766	0	0.29777	1.13094	-0.585912
00000001_5.tif	predator	CB1112	cat2(e1112)	12.109	6.627	5.7657	4.39326	-1.37244	0	0.29777	1.30818	-0.408672
00000001_5.tif	predator	CB1112	cat2(e1112)	10.554	7.759	5.7657	4.39074	-1.37496	0	0.29777	1.30743	-0.409422
00000001_5.tif	predator	CB1112	cat2(e1112)	10.595	7.634	5.7657	4.44424	-1.32147	0	0.29777	1.32336	-0.393493
00000001_5.tif	predator	CB1112	cat2(e1112)	11.693	5.599	5.7657	5.50202	-0.263687	0	0.29777	1.63834	-0.078518
[truncated: 4,391 more rows]
