# Supplementary material for: Dopamine signaling regulates predator-driven changes in Caenorhabditis elegans’ egg laying behavior
Source: eLife. 2023 Jul 11;12:e83957. doi: 10.7554/eLife.83957 (PMC10335835; doi:10.7554/eLife.83957)
Supplement: Figure 6—source data 3. — For each test arena, data tabulate the arena, predator exposure condition, genotype, <x,y> coordinates in pixels, lawn radius in pixels, the egg distance from arena center in pixels, the egg distance from lawn edge in pixels, position as 1 (off) or 0 (on) lawn, the conversion factor for pixel data in mm-per-pixel, the calculated distance from center in mm, the calculated distance from the lawn edge in mm. [file elife-83957-fig6-data3.xlsx]

## Sheet: Figure6G-I
Arena	Condition	Strain	Genotype	X	Y	LawnRadius	DistCenterPx	DistEdgePx	off	PxScale	DistCenterMm	DistEdgeMm
0000000_15.tif	predator	N2	wt	4.457	8.984	4.46345	11.2344	6.77096	1	0.29777	3.34527	2.01619
0000000_15.tif	predator	N2	wt	4.804	10.082	4.46345	10.8004	6.3369	1	0.29777	3.21602	1.88694
0000000_15.tif	predator	N2	wt	5.04	14.095	4.46345	11.1796	6.71615	1	0.29777	3.32895	1.99987
0000000_15.tif	predator	N2	wt	5.325	9.887	4.46345	10.2879	5.82447	1	0.29777	3.06343	1.73435
0000000_15.tif	predator	N2	wt	5.637	14.137	4.46345	10.6322	6.1687	1	0.29777	3.16594	1.83685
0000000_15.tif	predator	N2	wt	5.929	10.554	4.46345	9.6709	5.20745	1	0.29777	2.8797	1.55062
0000000_15.tif	predator	N2	wt	6.165	10.457	4.46345	9.43406	4.97062	1	0.29777	2.80918	1.4801
0000000_15.tif	predator	N2	wt	6.45	13.832	4.46345	9.76383	5.30038	1	0.29777	2.90737	1.57829
0000000_15.tif	predator	N2	wt	6.519	13.825	4.46345	9.69674	5.23329	1	0.29777	2.8874	1.55832
0000000_15.tif	predator	N2	wt	6.561	10.54	4.46345	9.03877	4.57532	1	0.29777	2.69147	1.36239
0000000_15.tif	predator	N2	wt	7.075	15.464	4.46345	9.90355	5.4401	1	0.29777	2.94898	1.6199
0000000_15.tif	predator	N2	wt	7.158	15.436	4.46345	9.81788	5.35443	1	0.29777	2.92347	1.59439
0000000_15.tif	predator	N2	wt	7.283	11.061	4.46345	8.34051	3.87706	1	0.29777	2.48355	1.15447
0000000_15.tif	predator	N2	wt	7.29	7.429	4.46345	8.83162	4.36817	1	0.29777	2.62979	1.30071
0000000_15.tif	predator	N2	wt	7.352	15.589	4.46345	9.73195	5.2685	1	0.29777	2.89788	1.5688
0000000_15.tif	predator	N2	wt	7.401	7.464	4.46345	8.71533	4.25188	1	0.29777	2.59516	1.26608
0000000_15.tif	predator	N2	wt	7.45	9.894	4.46345	8.16609	3.70264	1	0.29777	2.43162	1.10253
0000000_15.tif	predator	N2	wt	7.457	7.339	4.46345	8.70615	4.2427	1	0.29777	2.59243	1.26335
0000000_15.tif	predator	N2	wt	7.512	15.901	4.46345	9.76827	5.30482	1	0.29777	2.9087	1.57962
0000000_15.tif	predator	N2	wt	7.623	10.332	4.46345	7.97651	3.51306	1	0.29777	2.37516	1.04608
0000000_15.tif	predator	N2	wt	7.698	6.438	4.46345	8.84862	4.38517	1	0.29777	2.63485	1.30577
0000000_15.tif	predator	N2	wt	7.936	15.089	4.46345	8.97232	4.50887	1	0.29777	2.67169	1.34261
0000000_15.tif	predator	N2	wt	7.957	15.2	4.46345	9.01274	4.54929	1	0.29777	2.68372	1.35464
0000000_15.tif	predator	N2	wt	8.033	16.689	4.46345	9.82444	5.36099	1	0.29777	2.92542	1.59634
0000000_15.tif	predator	N2	wt	8.089	16.911	4.46345	9.92508	5.46163	1	0.29777	2.95539	1.62631
0000000_15.tif	predator	N2	wt	9.512	17.946	4.46345	9.67792	5.21447	1	0.29777	2.88179	1.55271
0000000_15.tif	predator	N2	wt	9.561	18.398	4.46345	10.0037	5.54025	1	0.29777	2.9788	1.64972
0000000_15.tif	predator	N2	wt	9.734	15.679	4.46345	7.87618	3.41273	1	0.29777	2.34529	1.01621
0000000_15.tif	predator	N2	wt	10.255	8.602	4.46345	5.64542	1.18197	1	0.29777	1.68104	0.351955
0000000_15.tif	predator	N2	wt	10.387	17.495	4.46345	8.78591	4.32246	1	0.29777	2.61618	1.2871
0000000_15.tif	predator	N2	wt	10.394	17.703	4.46345	8.95014	4.48669	1	0.29777	2.66508	1.336
0000000_15.tif	predator	N2	wt	10.415	6.877	4.46345	6.2802	1.81675	1	0.29777	1.87005	0.540973
0000000_15.tif	predator	N2	wt	10.672	15.915	4.46345	7.37891	2.91547	1	0.29777	2.19722	0.868138
0000000_15.tif	predator	N2	wt	10.741	18.797	4.46345	9.68198	5.21853	1	0.29777	2.883	1.55392
0000000_15.tif	predator	N2	wt	10.748	6.321	4.46345	6.3522	1.88875	1	0.29777	1.89149	0.562412
0000000_15.tif	predator	N2	wt	10.811	18.922	4.46345	9.75576	5.29232	1	0.29777	2.90497	1.57589
0000000_15.tif	predator	N2	wt	10.832	6.252	4.46345	6.3335	1.87005	1	0.29777	1.88593	0.556844
0000000_15.tif	predator	N2	wt	10.922	3.72	4.46345	8.17258	3.70913	1	0.29777	2.43355	1.10447
0000000_15.tif	predator	N2	wt	11.116	20.061	4.46345	10.6305	6.16705	1	0.29777	3.16545	1.83636
0000000_15.tif	predator	N2	wt	11.234	15.561	4.46345	6.74259	2.27914	1	0.29777	2.00774	0.67866
0000000_15.tif	predator	N2	wt	11.311	1.405	4.46345	9.98465	5.5212	1	0.29777	2.97313	1.64405
0000000_15.tif	predator	N2	wt	11.345	4.866	4.46345	6.99755	2.5341	1	0.29777	2.08366	0.754578
0000000_15.tif	predator	N2	wt	11.373	19.95	4.46345	10.4231	5.95969	1	0.29777	3.1037	1.77462
0000000_15.tif	predator	N2	wt	11.422	1.467	4.46345	9.88126	5.41781	1	0.29777	2.94234	1.61326
0000000_15.tif	predator	N2	wt	11.436	19.964	4.46345	10.4106	5.94714	1	0.29777	3.09996	1.77088
0000000_15.tif	predator	N2	wt	11.498	19.859	4.46345	10.2896	5.82612	1	0.29777	3.06392	1.73484
0000000_15.tif	predator	N2	wt	11.693	15.554	4.46345	6.44936	1.98591	1	0.29777	1.92043	0.591345
0000000_15.tif	predator	N2	wt	11.734	4.825	4.46345	6.80181	2.33836	1	0.29777	2.02538	0.696294
0000000_15.tif	predator	N2	wt	12.095	4.137	4.46345	7.19578	2.73233	1	0.29777	2.14269	0.813606
0000000_15.tif	predator	N2	wt	12.262	8.887	4.46345	3.67312	-0.790331	0	0.29777	1.09374	-0.235337
0000000_15.tif	predator	N2	wt	12.554	9.859	4.46345	3.09661	-1.36684	0	0.29777	0.922078	-0.407004
0000000_15.tif	predator	N2	wt	12.776	1.995	4.46345	8.88728	4.42383	1	0.29777	2.64636	1.31728
0000000_15.tif	predator	N2	wt	12.915	1.696	4.46345	9.12945	4.666	1	0.29777	2.71848	1.3894
0000000_15.tif	predator	N2	wt	13.026	1.523	4.46345	9.26351	4.80006	1	0.29777	2.75839	1.42931
0000000_15.tif	predator	N2	wt	13.151	4.637	4.46345	6.28163	1.81819	1	0.29777	1.87048	0.541401
0000000_15.tif	predator	N2	wt	13.443	1.891	4.46345	8.79922	4.33577	1	0.29777	2.62014	1.29106
0000000_15.tif	predator	N2	wt	13.602	6.03	4.46345	4.82469	0.361245	1	0.29777	1.43665	0.107568
0000000_15.tif	predator	N2	wt	14.04	5.849	4.46345	4.83144	0.36799	1	0.29777	1.43866	0.109577
0000000_15.tif	predator	N2	wt	14.78	2.311	4.46345	8.15224	3.68879	1	0.29777	2.42749	1.09841
0000000_15.tif	predator	N2	wt	14.898	2.186	4.46345	8.26578	3.80233	1	0.29777	2.4613	1.13222
0000000_15.tif	predator	N2	wt	15.085	0.991	4.46345	9.445	4.98155	1	0.29777	2.81244	1.48336
0000000_15.tif	predator	N2	wt	15.988	3.394	4.46345	7.03876	2.57531	1	0.29777	2.09593	0.766849
0000000_15.tif	predator	N2	wt	16.036	18.536	4.46345	8.12576	3.66231	1	0.29777	2.41961	1.09053
0000000_15.tif	predator	N2	wt	16.148	3.832	4.46345	6.61283	2.14938	1	0.29777	1.9691	0.640021
0000000_15.tif	predator	N2	wt	16.245	18.641	4.46345	8.24435	3.7809	1	0.29777	2.45492	1.12584
0000000_15.tif	predator	N2	wt	16.37	11.87	4.46345	1.64047	-2.82298	0	0.29777	0.488483	-0.840598
0000000_15.tif	predator	N2	wt	16.418	11.731	4.46345	1.5441	-2.91935	0	0.29777	0.459786	-0.869295
0000000_15.tif	predator	N2	wt	16.745	3.755	4.46345	6.76478	2.30133	1	0.29777	2.01435	0.685266
0000000_15.tif	predator	N2	wt	16.953	2.415	4.46345	8.12068	3.65723	1	0.29777	2.41809	1.08901
0000000_15.tif	predator	N2	wt	17.016	2.214	4.46345	8.32941	3.86597	1	0.29777	2.48025	1.15117
0000000_15.tif	predator	N2	wt	17.814	4.762	4.46345	6.07798	1.61453	1	0.29777	1.80984	0.480758
0000000_15.tif	predator	N2	wt	17.849	16.582	4.46345	6.55806	2.09461	1	0.29777	1.95279	0.623711
0000000_15.tif	predator	N2	wt	18.328	2.825	4.46345	8.07229	3.60884	1	0.29777	2.40369	1.0746
0000000_15.tif	predator	N2	wt	18.446	16.512	4.46345	6.72261	2.25916	1	0.29777	2.00179	0.672711
0000000_15.tif	predator	N2	wt	18.582	2.627	4.46345	8.34628	3.88283	1	0.29777	2.48527	1.15619
0000000_15.tif	predator	N2	wt	18.609	1.981	4.46345	8.96162	4.49817	1	0.29777	2.6685	1.33942
0000000_15.tif	predator	N2	wt	18.651	3.641	4.46345	7.43617	2.97272	1	0.29777	2.21427	0.885188
0000000_15.tif	predator	N2	wt	18.658	14.738	4.46345	5.29012	0.826668	1	0.29777	1.57524	0.246157
0000000_15.tif	predator	N2	wt	18.762	3.717	4.46345	7.41361	2.95016	1	0.29777	2.20755	0.878469
0000000_15.tif	predator	N2	wt	18.825	14.717	4.46345	5.3716	0.908152	1	0.29777	1.5995	0.27042
0000000_15.tif	predator	N2	wt	19.151	2.731	4.46345	8.47161	4.00816	1	0.29777	2.52259	1.19351
0000000_15.tif	predator	N2	wt	19.769	17.523	4.46345	8.23487	3.77142	1	0.29777	2.4521	1.12302
0000000_15.tif	predator	N2	wt	19.922	2.432	4.46345	9.08452	4.62107	1	0.29777	2.7051	1.37602
0000000_15.tif	predator	N2	wt	20.033	17.036	4.46345	7.96275	3.4993	1	0.29777	2.37107	1.04199
0000000_15.tif	predator	N2	wt	20.068	17.161	4.46345	8.08617	3.62272	1	0.29777	2.40782	1.07874
0000000_15.tif	predator	N2	wt	20.068	1.821	4.46345	9.69274	5.22929	1	0.29777	2.88621	1.55713
0000000_15.tif	predator	N2	wt	20.137	16.967	4.46345	7.96432	3.50088	1	0.29777	2.37154	1.04246
0000000_15.tif	predator	N2	wt	21.304	3.161	4.46345	9.23413	4.77068	1	0.29777	2.74965	1.42057
0000000_15.tif	predator	N2	wt	21.366	3.05	4.46345	9.35974	4.89629	1	0.29777	2.78705	1.45797
0000000_15.tif	predator	N2	wt	21.45	2.905	4.46345	9.52573	5.06228	1	0.29777	2.83648	1.50739
0000000_15.tif	predator	N2	wt	22.595	15.78	4.46345	8.81205	4.3486	1	0.29777	2.62396	1.29488
0000000_15.tif	predator	N2	wt	22.616	15.634	4.46345	8.74089	4.27745	1	0.29777	2.60278	1.27369
0000000_15.tif	predator	N2	wt	22.762	15.856	4.46345	8.99094	4.52749	1	0.29777	2.67723	1.34815
0000000_15.tif	predator	N2	wt	22.964	6.179	4.46345	8.49978	4.03633	1	0.29777	2.53098	1.2019
0000000_15.tif	predator	N2	wt	23.123	16.37	4.46345	9.5911	5.12765	1	0.29777	2.85594	1.52686
0000000_15.tif	predator	N2	wt	23.366	14.168	4.46345	8.62316	4.15971	1	0.29777	2.56772	1.23864
0000000_15.tif	predator	N2	wt	23.54	14.203	4.46345	8.79519	4.33175	1	0.29777	2.61894	1.28986
0000000_15.tif	predator	N2	wt	23.762	14.342	4.46345	9.05544	4.59199	1	0.29777	2.69644	1.36736
0000000_15.tif	predator	N2	wt	24.248	12.873	4.46345	8.98958	4.52613	1	0.29777	2.67683	1.34775
0000000_15.tif	predator	N2	wt	24.408	12.936	4.46345	9.16071	4.69726	1	0.29777	2.72779	1.3987
0000000_15.tif	predator	N2	wt	24.422	14.363	4.46345	9.66317	5.19972	1	0.29777	2.8774	1.54832
0000000_15.tif	predator	N2	wt	24.828	6.266	4.46345	10.1216	5.65815	1	0.29777	3.01391	1.68483
0000000_15.tif	predator	N2	wt	24.856	6.342	4.46345	10.1162	5.6528	1	0.29777	3.01231	1.68323
0000000_19.tif	control	N2	wt	8.74	14.698	5.052	8.38398	3.33198	1	0.29777	2.4965	0.992164
0000000_19.tif	control	N2	wt	8.849	14.724	5.052	8.30061	3.24861	1	0.29777	2.47167	0.967339
0000000_19.tif	control	N2	wt	11.155	10.227	5.052	4.99529	-0.0567137	0	0.29777	1.48745	-0.0168876
0000000_19.tif	control	N2	wt	11.266	7.766	5.052	5.69116	0.639154	1	0.29777	1.69466	0.190321
0000000_19.tif	control	N2	wt	11.3	11.422	5.052	4.87451	-0.177489	0	0.29777	1.45148	-0.052851
0000000_19.tif	control	N2	wt	11.425	11.436	5.052	4.75288	-0.299124	0	0.29777	1.41526	-0.0890701
0000000_19.tif	control	N2	wt	11.585	9.557	5.052	4.68884	-0.363166	0	0.29777	1.39619	-0.10814
0000000_19.tif	control	N2	wt	11.8	15.345	5.052	6.32559	1.27359	1	0.29777	1.88357	0.379236
0000000_19.tif	control	N2	wt	12.009	10.464	5.052	4.12452	-0.92748	0	0.29777	1.22816	-0.276176
0000000_19.tif	control	N2	wt	12.05	10.575	5.052	4.07791	-0.974093	0	0.29777	1.21428	-0.290056
0000000_19.tif	control	N2	wt	12.092	13.116	5.052	4.68645	-0.365547	0	0.29777	1.39549	-0.108849
0000000_19.tif	control	N2	wt	12.238	13.571	5.052	4.81516	-0.236845	0	0.29777	1.43381	-0.0705254
0000000_19.tif	control	N2	wt	12.384	9.481	5.052	3.94368	-1.10833	0	0.29777	1.17431	-0.330026
0000000_19.tif	control	N2	wt	12.418	7.005	5.052	5.25452	0.202522	1	0.29777	1.56464	0.0603051
0000000_19.tif	control	N2	wt	12.599	6.644	5.052	5.39629	0.344284	1	0.29777	1.60685	0.102517
0000000_19.tif	control	N2	wt	12.675	8.009	5.052	4.39328	-0.658723	0	0.29777	1.30819	-0.196148
0000000_19.tif	control	N2	wt	12.988	8.641	5.052	3.76836	-1.28365	0	0.29777	1.1221	-0.382231
0000000_19.tif	control	N2	wt	13.273	6.561	5.052	5.05036	-0.00164271	0	0.29777	1.50385	-0.000489151
0000000_19.tif	control	N2	wt	13.488	10.818	5.052	2.6385	-2.4135	0	0.29777	0.785667	-0.718668
0000000_19.tif	control	N2	wt	13.655	7.047	5.052	4.43374	-0.618265	0	0.29777	1.32023	-0.184101
0000000_19.tif	control	N2	wt	13.668	9.8	5.052	2.62676	-2.42524	0	0.29777	0.782172	-0.722163
0000000_19.tif	control	N2	wt	13.675	9.946	5.052	2.57208	-2.47992	0	0.29777	0.765888	-0.738447
0000000_19.tif	control	N2	wt	13.821	9.682	5.052	2.53074	-2.52127	0	0.29777	0.753577	-0.750757
0000000_19.tif	control	N2	wt	14.092	11.238	5.052	2.09575	-2.95625	0	0.29777	0.624052	-0.880283
0000000_19.tif	control	N2	wt	14.203	9.55	5.052	2.2548	-2.7972	0	0.29777	0.671412	-0.832923
0000000_19.tif	control	N2	wt	14.245	9.141	5.052	2.46092	-2.59108	0	0.29777	0.732789	-0.771545
0000000_19.tif	control	N2	wt	14.259	8.54	5.052	2.8764	-2.1756	0	0.29777	0.856506	-0.647829
0000000_19.tif	control	N2	wt	14.286	9.627	5.052	2.1439	-2.9081	0	0.29777	0.63839	-0.865944
0000000_19.tif	control	N2	wt	14.314	10.648	5.052	1.81281	-3.23919	0	0.29777	0.539801	-0.964534
0000000_19.tif	control	N2	wt	14.321	10.134	5.052	1.89959	-3.15241	0	0.29777	0.565641	-0.938694
0000000_19.tif	control	N2	wt	14.328	10.349	5.052	1.83674	-3.21526	0	0.29777	0.546926	-0.957409
0000000_19.tif	control	N2	wt	14.432	11.099	5.052	1.73296	-3.31904	0	0.29777	0.516023	-0.988311
0000000_19.tif	control	N2	wt	14.432	11.432	5.052	1.83316	-3.21885	0	0.29777	0.545859	-0.958476
0000000_19.tif	control	N2	wt	14.467	10.946	5.052	1.67214	-3.37986	0	0.29777	0.497913	-1.00642
0000000_19.tif	control	N2	wt	14.481	8.877	5.052	2.47642	-2.57559	0	0.29777	0.737403	-0.766932
0000000_19.tif	control	N2	wt	14.481	11.509	5.052	1.81965	-3.23235	0	0.29777	0.541838	-0.962497
0000000_19.tif	control	N2	wt	14.71	10.418	5.052	1.44877	-3.60323	0	0.29777	0.431401	-1.07293
0000000_19.tif	control	N2	wt	14.766	6.373	5.052	4.56307	-0.488931	0	0.29777	1.35875	-0.145589
0000000_19.tif	control	N2	wt	14.773	11.918	5.052	1.80045	-3.25155	0	0.29777	0.53612	-0.968214
0000000_19.tif	control	N2	wt	14.8	10.571	5.052	1.33439	-3.71761	0	0.29777	0.39734	-1.10699
0000000_19.tif	control	N2	wt	14.821	11.259	5.052	1.40759	-3.64441	0	0.29777	0.419139	-1.0852
0000000_19.tif	control	N2	wt	14.842	8.616	5.052	2.47201	-2.57999	0	0.29777	0.736092	-0.768243
0000000_19.tif	control	N2	wt	14.877	11.793	5.052	1.64	-3.412	0	0.29777	0.488343	-1.01599
0000000_19.tif	control	N2	wt	14.884	11.016	5.052	1.27375	-3.77825	0	0.29777	0.379286	-1.12505
0000000_19.tif	control	N2	wt	14.946	11.002	5.052	1.21019	-3.84181	0	0.29777	0.36036	-1.14398
0000000_19.tif	control	N2	wt	14.96	11.3	5.052	1.29741	-3.75459	0	0.29777	0.386329	-1.11801
0000000_19.tif	control	N2	wt	14.96	11.738	5.052	1.5412	-3.5108	0	0.29777	0.458924	-1.04541
0000000_19.tif	control	N2	wt	15.009	8.102	5.052	2.85422	-2.19778	0	0.29777	0.849902	-0.654433
0000000_19.tif	control	N2	wt	15.057	9.821	5.052	1.40182	-3.65019	0	0.29777	0.417419	-1.08692
0000000_19.tif	control	N2	wt	15.148	8.408	5.052	2.51825	-2.53375	0	0.29777	0.749859	-0.754476
0000000_19.tif	control	N2	wt	15.155	7.443	5.052	3.42618	-1.62582	0	0.29777	1.02021	-0.484122
0000000_19.tif	control	N2	wt	15.189	8.512	5.052	2.40649	-2.64551	0	0.29777	0.71658	-0.787755
0000000_19.tif	control	N2	wt	15.203	9.363	5.052	1.64804	-3.40396	0	0.29777	0.490737	-1.0136
0000000_19.tif	control	N2	wt	15.28	10.203	5.052	0.99534	-4.05666	0	0.29777	0.296382	-1.20795
0000000_19.tif	control	N2	wt	15.314	9.106	5.052	1.81435	-3.23766	0	0.29777	0.540258	-0.964077
0000000_19.tif	control	N2	wt	15.342	10.286	5.052	0.899632	-4.15237	0	0.29777	0.267883	-1.23645
0000000_19.tif	control	N2	wt	15.349	8.457	5.052	2.40087	-2.65114	0	0.29777	0.714906	-0.789429
0000000_19.tif	control	N2	wt	15.363	12.752	5.052	2.16175	-2.89025	0	0.29777	0.643705	-0.86063
0000000_19.tif	control	N2	wt	15.474	11.606	5.052	1.09221	-3.95979	0	0.29777	0.325228	-1.17911
0000000_19.tif	control	N2	wt	15.495	8.436	5.052	2.37797	-2.67403	0	0.29777	0.708089	-0.796246
0000000_19.tif	control	N2	wt	15.578	8.262	5.052	2.52691	-2.52509	0	0.29777	0.752439	-0.751895
0000000_19.tif	control	N2	wt	15.599	11.731	5.052	1.13167	-3.92033	0	0.29777	0.336978	-1.16736
0000000_19.tif	control	N2	wt	15.648	11.752	5.052	1.12874	-3.92326	0	0.29777	0.336105	-1.16823
0000000_19.tif	control	N2	wt	15.689	12.016	5.052	1.35885	-3.69315	0	0.29777	0.404624	-1.09971
0000000_19.tif	control	N2	wt	15.731	8.932	5.052	1.83969	-3.21232	0	0.29777	0.547803	-0.956531
0000000_19.tif	control	N2	wt	15.793	12.863	5.052	2.15967	-2.89233	0	0.29777	0.643085	-0.861249
0000000_19.tif	control	N2	wt	15.835	10.766	5.052	0.292351	-4.75965	0	0.29777	0.0870533	-1.41728
0000000_19.tif	control	N2	wt	15.925	9.502	5.052	1.24319	-3.80881	0	0.29777	0.370186	-1.13415
0000000_19.tif	control	N2	wt	16.023	9.293	5.052	1.43962	-3.61238	0	0.29777	0.428675	-1.07566
0000000_19.tif	control	N2	wt	16.113	9.55	5.052	1.17906	-3.87294	0	0.29777	0.351089	-1.15325
0000000_19.tif	control	N2	wt	16.134	10.175	5.052	0.554073	-4.49793	0	0.29777	0.164986	-1.33935
0000000_19.tif	control	N2	wt	16.21	11.807	5.052	1.08135	-3.97066	0	0.29777	0.321992	-1.18234
0000000_19.tif	control	N2	wt	16.286	12.405	5.052	1.68372	-3.36829	0	0.29777	0.50136	-1.00297
0000000_19.tif	control	N2	wt	16.328	12.905	5.052	2.18545	-2.86655	0	0.29777	0.650761	-0.853574
0000000_19.tif	control	N2	wt	16.342	9.773	5.052	0.980319	-4.07168	0	0.29777	0.29191	-1.21243
0000000_19.tif	control	N2	wt	16.411	9.307	5.052	1.45048	-3.60153	0	0.29777	0.431908	-1.07243
0000000_19.tif	control	N2	wt	16.425	9.175	5.052	1.58269	-3.46931	0	0.29777	0.471278	-1.03306
0000000_19.tif	control	N2	wt	16.467	8.623	5.052	2.13359	-2.91841	0	0.29777	0.635319	-0.869016
0000000_19.tif	control	N2	wt	16.488	10.231	5.052	0.616257	-4.43574	0	0.29777	0.183503	-1.32083
0000000_19.tif	control	N2	wt	16.495	11.807	5.052	1.13973	-3.91227	0	0.29777	0.339377	-1.16496
0000000_19.tif	control	N2	wt	16.502	11.689	5.052	1.03137	-4.02063	0	0.29777	0.307112	-1.19722
0000000_19.tif	control	N2	wt	16.516	8.47	5.052	2.29259	-2.75941	0	0.29777	0.682664	-0.821671
0000000_19.tif	control	N2	wt	16.523	11.911	5.052	1.24721	-3.80479	0	0.29777	0.371381	-1.13295
0000000_19.tif	control	N2	wt	16.564	9.085	5.052	1.7016	-3.3504	0	0.29777	0.506687	-0.997648
0000000_19.tif	control	N2	wt	16.564	11.189	5.052	0.635862	-4.41614	0	0.29777	0.189341	-1.31499
0000000_19.tif	control	N2	wt	16.585	10.946	5.052	0.508615	-4.54339	0	0.29777	0.15145	-1.35288
0000000_19.tif	control	N2	wt	16.613	9.696	5.052	1.14247	-3.90953	0	0.29777	0.340193	-1.16414
0000000_19.tif	control	N2	wt	16.648	8.644	5.052	2.14959	-2.90241	0	0.29777	0.640085	-0.86425
0000000_19.tif	control	N2	wt	16.655	11.161	5.052	0.683757	-4.36824	0	0.29777	0.203602	-1.30073
0000000_19.tif	control	N2	wt	16.661	8.443	5.052	2.348	-2.704	0	0.29777	0.699163	-0.805171
0000000_19.tif	control	N2	wt	16.668	11.03	5.052	0.620846	-4.43116	0	0.29777	0.184869	-1.31947
0000000_19.tif	control	N2	wt	16.717	10.905	5.052	0.617608	-4.43439	0	0.29777	0.183905	-1.32043
0000000_19.tif	control	N2	wt	16.724	11.766	5.052	1.19757	-3.85443	0	0.29777	0.3566	-1.14773
0000000_19.tif	control	N2	wt	16.731	11.655	5.052	1.10667	-3.94533	0	0.29777	0.329532	-1.1748
0000000_19.tif	control	N2	wt	16.745	10.564	5.052	0.64158	-4.41042	0	0.29777	0.191043	-1.31329
0000000_19.tif	control	N2	wt	16.8	10.62	5.052	0.683744	-4.36826	0	0.29777	0.203598	-1.30074
0000000_19.tif	control	N2	wt	16.807	12.821	5.052	2.20036	-2.85164	0	0.29777	0.655201	-0.849133
0000000_19.tif	control	N2	wt	16.877	12.752	5.052	2.15825	-2.89375	0	0.29777	0.642661	-0.861673
0000000_19.tif	control	N2	wt	16.925	8.068	5.052	2.77865	-2.27335	0	0.29777	0.8274	-0.676935
0000000_19.tif	control	N2	wt	16.946	8.443	5.052	2.42896	-2.62304	0	0.29777	0.723271	-0.781064
0000000_19.tif	control	N2	wt	17.057	10.009	5.052	1.17772	-3.87428	0	0.29777	0.35069	-1.15364
0000000_19.tif	control	N2	wt	17.092	10.766	5.052	0.967708	-4.08429	0	0.29777	0.288154	-1.21618
0000000_19.tif	control	N2	wt	17.113	11.606	5.052	1.32109	-3.73091	0	0.29777	0.39338	-1.11095
0000000_19.tif	control	N2	wt	17.168	8.137	5.052	2.79398	-2.25802	0	0.29777	0.831963	-0.672372
0000000_19.tif	control	N2	wt	17.168	10.224	5.052	1.15882	-3.89318	0	0.29777	0.345063	-1.15927
0000000_19.tif	control	N2	wt	17.182	11.668	5.052	1.41385	-3.63815	0	0.29777	0.421002	-1.08333
0000000_19.tif	control	N2	wt	17.189	10.148	5.052	1.21229	-3.83971	0	0.29777	0.360985	-1.14335
0000000_19.tif	control	N2	wt	17.21	10.321	5.052	1.15918	-3.89283	0	0.29777	0.345168	-1.15917
0000000_19.tif	control	N2	wt	17.245	12.759	5.052	2.31847	-2.73353	0	0.29777	0.690371	-0.813964
0000000_19.tif	control	N2	wt	17.356	10.05	5.052	1.40585	-3.64616	0	0.29777	0.418619	-1.08572
0000000_19.tif	control	N2	wt	17.356	11.543	5.052	1.47579	-3.57621	0	0.29777	0.439446	-1.06489
0000000_19.tif	control	N2	wt	17.398	11.696	5.052	1.59863	-3.45337	0	0.29777	0.476024	-1.02831
0000000_19.tif	control	N2	wt	17.467	8.568	5.052	2.54379	-2.50821	0	0.29777	0.757465	-0.746869
0000000_19.tif	control	N2	wt	17.557	5.47	5.052	5.45048	0.398476	1	0.29777	1.62299	0.118654
0000000_19.tif	control	N2	wt	17.557	8.408	5.052	2.72721	-2.32479	0	0.29777	0.812081	-0.692254
0000000_19.tif	control	N2	wt	17.599	7.477	5.052	3.57046	-1.48154	0	0.29777	1.06318	-0.441159
0000000_19.tif	control	N2	wt	17.627	8.061	5.052	3.06174	-1.99027	0	0.29777	0.911693	-0.592641
0000000_19.tif	control	N2	wt	17.661	10.474	5.052	1.55702	-3.49498	0	0.29777	0.463635	-1.0407
0000000_19.tif	control	N2	wt	17.682	12.384	5.052	2.27228	-2.77972	0	0.29777	0.676618	-0.827717
0000000_19.tif	control	N2	wt	17.71	5.45	5.052	5.51181	0.45981	1	0.29777	1.64125	0.136918
0000000_19.tif	control	N2	wt	17.717	12.793	5.052	2.60664	-2.44536	0	0.29777	0.776179	-0.728156
0000000_19.tif	control	N2	wt	17.731	10.46	5.052	1.62837	-3.42363	0	0.29777	0.48488	-1.01945
0000000_19.tif	control	N2	wt	17.752	7.373	5.052	3.72959	-1.32241	0	0.29777	1.11056	-0.393774
0000000_19.tif	control	N2	wt	17.773	7.54	5.052	3.58966	-1.46235	0	0.29777	1.06889	-0.435443
0000000_19.tif	control	N2	wt	17.849	7.422	5.052	3.7294	-1.3226	0	0.29777	1.1105	-0.393831
0000000_19.tif	control	N2	wt	17.849	10.286	5.052	1.78001	-3.27199	0	0.29777	0.530033	-0.974302
0000000_19.tif	control	N2	wt	17.891	10.314	5.052	1.81411	-3.2379	0	0.29777	0.540186	-0.964148
0000000_19.tif	control	N2	wt	17.891	13.675	5.052	3.43477	-1.61723	0	0.29777	1.02277	-0.481562
0000000_19.tif	control	N2	wt	17.911	13.564	5.052	3.35067	-1.70133	0	0.29777	0.99773	-0.506604
0000000_19.tif	control	N2	wt	17.939	13.28	5.052	3.13021	-1.92179	0	0.29777	0.932082	-0.572253
0000000_19.tif	control	N2	wt	18.12	6.3	5.052	4.85758	-0.194424	0	0.29777	1.44644	-0.0578935
0000000_19.tif	control	N2	wt	18.231	9.13	5.052	2.64425	-2.40776	0	0.29777	0.787377	-0.716957
0000000_19.tif	control	N2	wt	18.28	9.707	5.052	2.38506	-2.66694	0	0.29777	0.710199	-0.794135
0000000_19.tif	control	N2	wt	18.293	8.589	5.052	3.04628	-2.00572	0	0.29777	0.907091	-0.597244
0000000_19.tif	control	N2	wt	18.293	6.293	5.052	4.93744	-0.114561	0	0.29777	1.47022	-0.0341129
0000000_19.tif	control	N2	wt	18.349	10.651	5.052	2.22537	-2.82663	0	0.29777	0.662648	-0.841687
0000000_19.tif	control	N2	wt	18.453	8.707	5.052	3.08352	-1.96849	0	0.29777	0.918178	-0.586156
0000000_19.tif	control	N2	wt	18.46	8.227	5.052	3.42231	-1.62969	0	0.29777	1.01906	-0.485272
0000000_19.tif	control	N2	wt	18.467	10.415	5.052	2.36296	-2.68905	0	0.29777	0.703617	-0.800717
0000000_19.tif	control	N2	wt	18.481	8.498	5.052	3.2447	-1.8073	0	0.29777	0.966175	-0.538159
0000000_19.tif	control	N2	wt	18.495	8.366	5.052	3.34674	-1.70526	0	0.29777	0.996559	-0.507776
0000000_19.tif	control	N2	wt	18.543	11.102	5.052	2.4466	-2.6054	0	0.29777	0.728524	-0.77581
0000000_19.tif	control	N2	wt	18.557	11.498	5.052	2.55068	-2.50132	0	0.29777	0.759517	-0.744818
0000000_19.tif	control	N2	wt	18.641	10.109	5.052	2.59127	-2.46074	0	0.29777	0.771601	-0.732734
0000000_19.tif	control	N2	wt	18.724	11.054	5.052	2.61924	-2.43276	0	0.29777	0.779932	-0.724403
0000000_19.tif	control	N2	wt	18.891	11.012	5.052	2.78044	-2.27156	0	0.29777	0.827932	-0.676403
0000000_19.tif	control	N2	wt	18.911	10.241	5.052	2.82842	-2.22359	0	0.29777	0.842218	-0.662117
0000000_19.tif	control	N2	wt	18.995	11.863	5.052	3.08591	-1.96609	0	0.29777	0.918892	-0.585442
0000000_19.tif	control	N2	wt	19.023	10.137	5.052	2.95785	-2.09415	0	0.29777	0.880759	-0.623576
0000000_19.tif	control	N2	wt	19.043	9.047	5.052	3.36806	-1.68394	0	0.29777	1.00291	-0.501427
0000000_19.tif	control	N2	wt	19.05	11.925	5.052	3.16007	-1.89193	0	0.29777	0.940974	-0.563361
0000000_19.tif	control	N2	wt	19.356	9.158	5.052	3.59269	-1.45931	0	0.29777	1.06979	-0.43454
0000000_19.tif	control	N2	wt	20.273	7.602	5.052	5.19462	0.142614	1	0.29777	1.5468	0.0424661
0000000_19.tif	control	N2	wt	20.495	10.373	5.052	4.38448	-0.667525	0	0.29777	1.30557	-0.198769
0000000_19.tif	control	N2	wt	20.564	10.311	5.052	4.45864	-0.593365	0	0.29777	1.32765	-0.176686
0000000_19.tif	control	N2	wt	20.578	10.547	5.052	4.45672	-0.595284	0	0.29777	1.32708	-0.177258
0000000_19.tif	control	N2	wt	20.953	10.505	5.052	4.83319	-0.218808	0	0.29777	1.43918	-0.0651546
0000000_19.tif	control	N2	wt	21.363	12.377	5.052	5.49113	0.439132	1	0.29777	1.63509	0.13076
0000000_19.tif	control	N2	wt	21.675	11.175	5.052	5.56789	0.51589	1	0.29777	1.65795	0.153616
0000000_19.tif	control	N2	wt	21.696	11.356	5.052	5.60617	0.554171	1	0.29777	1.66935	0.165015
0000000_19.tif	control	N2	wt	21.759	12.405	5.052	5.878	0.826002	1	0.29777	1.75029	0.245959
0000000_19.tif	control	N2	wt	21.78	11.342	5.052	5.68813	0.636126	1	0.29777	1.69375	0.189419
0000000_19.tif	control	N2	wt	22.401	12.168	5.052	6.43886	1.38686	1	0.29777	1.9173	0.412964
0000000_19.tif	control	N2	wt	23.797	14.773	5.052	8.67257	3.62057	1	0.29777	2.58243	1.0781
0000000_24.tif	predator	N2	wt	4.208	10.745	5.50523	9.83235	4.32712	1	0.29777	2.92778	1.28849
0000000_24.tif	predator	N2	wt	4.354	9.542	5.50523	9.86342	4.35819	1	0.29777	2.93703	1.29774
0000000_24.tif	predator	N2	wt	4.63	12.964	5.50523	9.4769	3.97167	1	0.29777	2.82194	1.18264
0000000_24.tif	predator	N2	wt	4.635	10.953	5.50523	9.39082	3.88559	1	0.29777	2.7963	1.15701
0000000_24.tif	predator	N2	wt	4.724	10.932	5.50523	9.30346	3.79823	1	0.29777	2.77029	1.131
0000000_24.tif	predator	N2	wt	4.74	13.208	5.50523	9.40729	3.90206	1	0.29777	2.80121	1.16192
0000000_24.tif	predator	N2	wt	5.417	10.99	5.50523	8.60811	3.10288	1	0.29777	2.56324	0.923943
0000000_24.tif	predator	N2	wt	5.729	6.948	5.50523	9.48309	3.97786	1	0.29777	2.82378	1.18449
0000000_24.tif	predator	N2	wt	5.818	6.859	5.50523	9.44965	3.94442	1	0.29777	2.81382	1.17453
0000000_24.tif	predator	N2	wt	5.99	7.062	5.50523	9.1997	3.69447	1	0.29777	2.73939	1.1001
0000000_24.tif	predator	N2	wt	6.693	17.828	5.50523	9.61914	4.11391	1	0.29777	2.86429	1.225
0000000_24.tif	predator	N2	wt	7.062	18.417	5.50523	9.74562	4.24039	1	0.29777	2.90195	1.26266
0000000_24.tif	predator	N2	wt	7.109	7.036	5.50523	8.2574	2.75217	1	0.29777	2.4588	0.819512
0000000_24.tif	predator	N2	wt	7.859	5.401	5.50523	8.7137	3.20847	1	0.29777	2.59468	0.955387
0000000_24.tif	predator	N2	wt	8.312	5.906	5.50523	8.03628	2.53105	1	0.29777	2.39296	0.753671
0000000_24.tif	predator	N2	wt	8.443	21.188	5.50523	11.1035	5.59828	1	0.29777	3.30629	1.667
0000000_24.tif	predator	N2	wt	8.693	7.443	5.50523	6.73168	1.22645	1	0.29777	2.00449	0.365201
0000000_24.tif	predator	N2	wt	8.87	19.438	5.50523	9.38871	3.88348	1	0.29777	2.79568	1.15638
0000000_24.tif	predator	N2	wt	8.87	20.458	5.50523	10.2578	4.75258	1	0.29777	3.05447	1.41518
0000000_24.tif	predator	N2	wt	9.021	4.724	5.50523	8.47452	2.96929	1	0.29777	2.52346	0.884167
0000000_24.tif	predator	N2	wt	9.042	4.891	5.50523	8.3275	2.82227	1	0.29777	2.47968	0.840389
0000000_24.tif	predator	N2	wt	9.057	20.339	5.50523	10.0617	4.55647	1	0.29777	2.99607	1.35678
0000000_24.tif	predator	N2	wt	9.359	4.156	5.50523	8.75622	3.25099	1	0.29777	2.60734	0.968047
0000000_24.tif	predator	N2	wt	9.708	21.099	5.50523	10.4457	4.94052	1	0.29777	3.11043	1.47114
0000000_24.tif	predator	N2	wt	10	8.323	5.50523	5.16092	-0.344314	0	0.29777	1.53677	-0.102526
0000000_24.tif	predator	N2	wt	11.635	21.672	5.50523	10.3685	4.86327	1	0.29777	3.08743	1.44814
0000000_24.tif	predator	N2	wt	12.781	2.646	5.50523	9.01548	3.51025	1	0.29777	2.68454	1.04525
0000000_24.tif	predator	N2	wt	12.859	3.401	5.50523	8.25691	2.75168	1	0.29777	2.45866	0.819369
0000000_24.tif	predator	N2	wt	13.047	2.708	5.50523	8.92158	3.41635	1	0.29777	2.65658	1.01729
0000000_24.tif	predator	N2	wt	13.214	22.417	5.50523	10.8678	5.36259	1	0.29777	3.23611	1.59682
0000000_24.tif	predator	N2	wt	13.234	22.25	5.50523	10.6998	5.19458	1	0.29777	3.18608	1.54679
0000000_24.tif	predator	N2	wt	14.146	2.755	5.50523	8.82413	3.3189	1	0.29777	2.62756	0.988268
0000000_24.tif	predator	N2	wt	14.25	3.151	5.50523	8.43056	2.92533	1	0.29777	2.51037	0.871076
0000000_24.tif	predator	N2	wt	14.557	22.109	5.50523	10.5455	5.04023	1	0.29777	3.14012	1.50083
0000000_24.tif	predator	N2	wt	14.599	21.969	5.50523	10.408	4.90273	1	0.29777	3.09918	1.45989
0000000_24.tif	predator	N2	wt	16	21.354	5.50523	9.97748	4.47225	1	0.29777	2.971	1.3317
0000000_24.tif	predator	N2	wt	16.422	21.792	5.50523	10.4961	4.99085	1	0.29777	3.12542	1.48613
0000000_24.tif	predator	N2	wt	17.229	21.974	5.50523	10.8844	5.37921	1	0.29777	3.24106	1.60177
0000000_24.tif	predator	N2	wt	17.5	21.021	5.50523	10.069	4.5638	1	0.29777	2.99825	1.35896
0000000_24.tif	predator	N2	wt	18.12	21.479	5.50523	10.7221	5.21685	1	0.29777	3.19271	1.55342
0000000_24.tif	predator	N2	wt	18.146	21.536	5.50523	10.7847	5.27946	1	0.29777	3.21136	1.57207
0000000_24.tif	predator	N2	wt	18.88	20.88	5.50523	10.502	4.99681	1	0.29777	3.12719	1.4879
0000000_24.tif	predator	N2	wt	18.927	20.443	5.50523	10.1397	4.63451	1	0.29777	3.01931	1.38002
0000000_24.tif	predator	N2	wt	19.083	20.573	5.50523	10.3294	4.82415	1	0.29777	3.07578	1.43649
0000000_24.tif	predator	N2	wt	20.099	19.281	5.50523	9.82207	4.31684	1	0.29777	2.92472	1.28543
0000000_24.tif	predator	N2	wt	20.464	18.38	5.50523	9.38008	3.87485	1	0.29777	2.79311	1.15381
0000000_24.tif	predator	N2	wt	20.578	20.411	5.50523	11.0103	5.50505	1	0.29777	3.27853	1.63924
0000000_24.tif	predator	N2	wt	20.922	17.943	5.50523	9.3999	3.89467	1	0.29777	2.79901	1.15972
0000000_24.tif	predator	N2	wt	20.984	18.641	5.50523	9.92937	4.42414	1	0.29777	2.95667	1.31738
0000000_24.tif	predator	N2	wt	21.13	17.443	5.50523	9.22843	3.7232	1	0.29777	2.74795	1.10866
0000000_24.tif	predator	N2	wt	21.224	17.344	5.50523	9.23909	3.73386	1	0.29777	2.75112	1.11183
0000000_24.tif	predator	N2	wt	22.24	10.25	5.50523	8.34139	2.83616	1	0.29777	2.48382	0.844524
0000000_24.tif	predator	N2	wt	22.411	10.115	5.50523	8.53236	3.02713	1	0.29777	2.54068	0.901389
0000000_24.tif	predator	N2	wt	23.26	11.062	5.50523	9.26937	3.76414	1	0.29777	2.76014	1.12085
00000001_3.tif	control	CB1112	cat2(e1112)	7.021	12.557	5.83338	4.88922	-0.94416	0	0.29777	1.45586	-0.281143
00000001_3.tif	control	CB1112	cat2(e1112)	7.047	12.651	5.83338	4.86807	-0.965308	0	0.29777	1.44956	-0.28744
00000001_3.tif	control	CB1112	cat2(e1112)	7.562	12.536	5.83338	4.34781	-1.48557	0	0.29777	1.29465	-0.442357
00000001_3.tif	control	CB1112	cat2(e1112)	7.651	12.615	5.83338	4.263	-1.57038	0	0.29777	1.26939	-0.467612
00000001_3.tif	control	CB1112	cat2(e1112)	8.604	14.495	5.83338	3.93536	-1.89801	0	0.29777	1.17183	-0.565171
00000001_3.tif	control	CB1112	cat2(e1112)	8.812	14.286	5.83338	3.64767	-2.18571	0	0.29777	1.08617	-0.650839
00000001_3.tif	control	CB1112	cat2(e1112)	8.859	8.693	5.83338	4.7631	-1.07028	0	0.29777	1.41831	-0.318696
00000001_3.tif	control	CB1112	cat2(e1112)	9.214	9.589	5.83338	3.85903	-1.97435	0	0.29777	1.1491	-0.587902
00000001_3.tif	control	CB1112	cat2(e1112)	9.266	8.792	5.83338	4.43367	-1.3997	0	0.29777	1.32021	-0.41679
00000001_3.tif	control	CB1112	cat2(e1112)	9.266	8.661	5.83338	4.53959	-1.29379	0	0.29777	1.35175	-0.385252
00000001_3.tif	control	CB1112	cat2(e1112)	9.271	10.385	5.83338	3.28941	-2.54397	0	0.29777	0.979486	-0.757518
00000001_3.tif	control	CB1112	cat2(e1112)	9.609	11.833	5.83338	2.35534	-3.47803	0	0.29777	0.701351	-1.03565
00000001_3.tif	control	CB1112	cat2(e1112)	9.63	11.401	5.83338	2.46747	-3.36591	0	0.29777	0.734737	-1.00227
00000001_3.tif	control	CB1112	cat2(e1112)	9.635	12.177	5.83338	2.27789	-3.55549	0	0.29777	0.678286	-1.05872
00000001_3.tif	control	CB1112	cat2(e1112)	9.781	8.896	5.83338	4.05874	-1.77463	0	0.29777	1.20857	-0.528433
00000001_3.tif	control	CB1112	cat2(e1112)	9.802	10.151	5.83338	3.04631	-2.78706	0	0.29777	0.907101	-0.829904
00000001_3.tif	control	CB1112	cat2(e1112)	9.854	12.208	5.83338	2.05719	-3.77619	0	0.29777	0.612569	-1.12444
00000001_3.tif	control	CB1112	cat2(e1112)	9.885	13.901	5.83338	2.54512	-3.28825	0	0.29777	0.757861	-0.979143
00000001_3.tif	control	CB1112	cat2(e1112)	10.271	14.453	5.83338	2.66064	-3.17273	0	0.29777	0.79226	-0.944745
00000001_3.tif	control	CB1112	cat2(e1112)	10.302	10.557	5.83338	2.40874	-3.42464	0	0.29777	0.71725	-1.01975
00000001_3.tif	control	CB1112	cat2(e1112)	10.359	16.427	5.83338	4.3569	-1.47648	0	0.29777	1.29735	-0.439652
00000001_3.tif	control	CB1112	cat2(e1112)	10.406	14.333	5.83338	2.48323	-3.35014	0	0.29777	0.739432	-0.997573
00000001_3.tif	control	CB1112	cat2(e1112)	10.484	12.74	5.83338	1.47346	-4.35992	0	0.29777	0.438752	-1.29825
00000001_3.tif	control	CB1112	cat2(e1112)	11.203	12.891	5.83338	0.884634	-4.94874	0	0.29777	0.263418	-1.47359
00000001_3.tif	control	CB1112	cat2(e1112)	11.406	10.13	5.83338	2.27951	-3.55386	0	0.29777	0.67877	-1.05823
00000001_3.tif	control	CB1112	cat2(e1112)	12.109	11.854	5.83338	0.539638	-5.29374	0	0.29777	0.160688	-1.57632
00000001_3.tif	control	CB1112	cat2(e1112)	12.302	14.484	5.83338	2.1665	-3.66688	0	0.29777	0.645118	-1.09189
00000001_3.tif	control	CB1112	cat2(e1112)	12.458	12.417	5.83338	0.555583	-5.27779	0	0.29777	0.165436	-1.57157
00000001_3.tif	control	CB1112	cat2(e1112)	12.505	11.24	5.83338	1.26483	-4.56855	0	0.29777	0.376629	-1.36038
00000001_3.tif	control	CB1112	cat2(e1112)	12.557	16.026	5.83338	3.72926	-2.10412	0	0.29777	1.11046	-0.626543
00000001_3.tif	control	CB1112	cat2(e1112)	12.589	12.172	5.83338	0.706833	-5.12654	0	0.29777	0.210474	-1.52653
00000001_3.tif	control	CB1112	cat2(e1112)	12.609	14.276	5.83338	2.04653	-3.78684	0	0.29777	0.609396	-1.12761
00000001_3.tif	control	CB1112	cat2(e1112)	12.755	9.422	5.83338	3.05245	-2.78093	0	0.29777	0.908927	-0.828078
00000001_3.tif	control	CB1112	cat2(e1112)	12.786	11.156	5.83338	1.48647	-4.3469	0	0.29777	0.442627	-1.29438
00000001_3.tif	control	CB1112	cat2(e1112)	13.047	14.547	5.83338	2.47207	-3.36131	0	0.29777	0.736108	-1.0009
00000001_3.tif	control	CB1112	cat2(e1112)	13.068	12.703	5.83338	1.21328	-4.6201	0	0.29777	0.361278	-1.37573
00000001_3.tif	control	CB1112	cat2(e1112)	13.208	12.036	5.83338	1.34027	-4.4931	0	0.29777	0.399093	-1.33791
00000001_3.tif	control	CB1112	cat2(e1112)	13.292	15.354	5.83338	3.30469	-2.52868	0	0.29777	0.984038	-0.752966
00000001_3.tif	control	CB1112	cat2(e1112)	13.333	15.438	5.83338	3.39814	-2.43523	0	0.29777	1.01187	-0.725139
00000001_3.tif	control	CB1112	cat2(e1112)	13.406	12.016	5.83338	1.53761	-4.29577	0	0.29777	0.457854	-1.27915
00000001_3.tif	control	CB1112	cat2(e1112)	13.516	12.161	5.83338	1.62153	-4.21185	0	0.29777	0.482842	-1.25416
00000001_3.tif	control	CB1112	cat2(e1112)	13.76	8.25	5.83338	4.50335	-1.33003	0	0.29777	1.34096	-0.396043
00000001_3.tif	control	CB1112	cat2(e1112)	13.99	9.807	5.83338	3.29094	-2.54244	0	0.29777	0.979942	-0.757062
00000001_3.tif	control	CB1112	cat2(e1112)	14.13	14.599	5.83338	3.1601	-2.67328	0	0.29777	0.940982	-0.796023
00000001_3.tif	control	CB1112	cat2(e1112)	14.292	13.417	5.83338	2.61208	-3.2213	0	0.29777	0.777799	-0.959205
00000001_3.tif	control	CB1112	cat2(e1112)	14.297	8.964	5.83338	4.14837	-1.68501	0	0.29777	1.23526	-0.501744
00000001_3.tif	control	CB1112	cat2(e1112)	14.542	9.958	5.83338	3.56221	-2.27117	0	0.29777	1.06072	-0.676286
00000001_3.tif	control	CB1112	cat2(e1112)	15.094	15.135	5.83338	4.23052	-1.60286	0	0.29777	1.25972	-0.477282
00000001_3.tif	control	CB1112	cat2(e1112)	15.458	15.234	5.83338	4.57287	-1.26051	0	0.29777	1.36166	-0.375342
00000001_3.tif	control	CB1112	cat2(e1112)	15.578	15.302	5.83338	4.70896	-1.12442	0	0.29777	1.40219	-0.334818
00000001_3.tif	control	CB1112	cat2(e1112)	15.719	15.271	5.83338	4.80082	-1.03256	0	0.29777	1.42954	-0.307465
00000001_3.tif	control	CB1112	cat2(e1112)	16.427	12.24	5.83338	4.52244	-1.31094	0	0.29777	1.34665	-0.390358
00000001_4.tif	control	IV111	CEPrescue	6.203	13.516	5.67716	9.33565	3.65849	1	0.29777	2.77988	1.08939
00000001_4.tif	control	IV111	CEPrescue	6.464	11.12	5.67716	8.86807	3.19091	1	0.29777	2.64065	0.950157
00000001_4.tif	control	IV111	CEPrescue	6.964	16.005	5.67716	9.48573	3.80857	1	0.29777	2.82457	1.13408
00000001_4.tif	control	IV111	CEPrescue	7.094	16.198	5.67716	9.46524	3.78808	1	0.29777	2.81846	1.12798
00000001_4.tif	control	IV111	CEPrescue	7.943	10.526	5.67716	7.44677	1.76961	1	0.29777	2.21743	0.526938
00000001_4.tif	control	IV111	CEPrescue	7.974	11.411	5.67716	7.34982	1.67266	1	0.29777	2.18856	0.498069
00000001_4.tif	control	IV111	CEPrescue	8.495	11.859	5.67716	6.83636	1.1592	1	0.29777	2.03566	0.345175
00000001_4.tif	control	IV111	CEPrescue	9.109	11.776	5.67716	6.21923	0.54207	1	0.29777	1.8519	0.161412
00000001_4.tif	control	IV111	CEPrescue	9.359	12.568	5.67716	6.0552	0.378044	1	0.29777	1.80306	0.11257
00000001_4.tif	control	IV111	CEPrescue	9.422	16.005	5.67716	7.41135	1.73419	1	0.29777	2.20688	0.516389
00000001_4.tif	control	IV111	CEPrescue	9.443	17.599	5.67716	8.45674	2.77958	1	0.29777	2.51816	0.827676
00000001_4.tif	control	IV111	CEPrescue	9.516	11.349	5.67716	5.80955	0.132386	1	0.29777	1.72991	0.0394207
00000001_4.tif	control	IV111	CEPrescue	9.536	17.609	5.67716	8.39959	2.72243	1	0.29777	2.50115	0.810658
00000001_4.tif	control	IV111	CEPrescue	9.578	14.87	5.67716	6.64987	0.972714	1	0.29777	1.98013	0.289645
00000001_4.tif	control	IV111	CEPrescue	9.578	10.651	5.67716	5.8105	0.133341	1	0.29777	1.73019	0.0397049
00000001_4.tif	control	IV111	CEPrescue	9.578	10.328	5.67716	5.86756	0.190401	1	0.29777	1.74718	0.0566957
00000001_4.tif	control	IV111	CEPrescue	9.62	14.755	5.67716	6.55614	0.878979	1	0.29777	1.95222	0.261734
00000001_4.tif	control	IV111	CEPrescue	9.786	14.891	5.67716	6.48192	0.804758	1	0.29777	1.93012	0.239633
00000001_4.tif	control	IV111	CEPrescue	9.953	14.734	5.67716	6.25782	0.580656	1	0.29777	1.86339	0.172902
00000001_4.tif	control	IV111	CEPrescue	10.505	5.432	5.67716	7.7646	2.08744	1	0.29777	2.31207	0.621578
00000001_4.tif	control	IV111	CEPrescue	10.724	6.943	5.67716	6.48914	0.811976	1	0.29777	1.93227	0.241782
00000001_4.tif	control	IV111	CEPrescue	10.849	13.714	5.67716	4.98256	-0.694598	0	0.29777	1.48366	-0.206831
00000001_4.tif	control	IV111	CEPrescue	10.995	11.859	5.67716	4.34118	-1.33598	0	0.29777	1.29267	-0.397815
00000001_4.tif	control	IV111	CEPrescue	11.047	14.786	5.67716	5.38	-0.29716	0	0.29777	1.602	-0.0884854
00000001_4.tif	control	IV111	CEPrescue	11.172	11.609	5.67716	4.15193	-1.52523	0	0.29777	1.23632	-0.454167
00000001_4.tif	control	IV111	CEPrescue	11.776	7.807	5.67716	5.13566	-0.5415	0	0.29777	1.52925	-0.161243
00000001_4.tif	control	IV111	CEPrescue	11.984	11.984	5.67716	3.37095	-2.30621	0	0.29777	1.00377	-0.686721
00000001_4.tif	control	IV111	CEPrescue	12.849	15.568	5.67716	4.7433	-0.933861	0	0.29777	1.41241	-0.278076
00000001_4.tif	control	IV111	CEPrescue	12.974	10.755	5.67716	2.47074	-3.20642	0	0.29777	0.735712	-0.954776
00000001_4.tif	control	IV111	CEPrescue	13.036	15.755	5.67716	4.81219	-0.864975	0	0.29777	1.43292	-0.257564
00000001_4.tif	control	IV111	CEPrescue	13.224	9.724	5.67716	2.76315	-2.91401	0	0.29777	0.822784	-0.867704
00000001_4.tif	control	IV111	CEPrescue	13.391	15.297	5.67716	4.24156	-1.4356	0	0.29777	1.26301	-0.42748
00000001_4.tif	control	IV111	CEPrescue	13.422	15.578	5.67716	4.4803	-1.19686	0	0.29777	1.3341	-0.35639
00000001_4.tif	control	IV111	CEPrescue	13.526	14.328	5.67716	3.33294	-2.34422	0	0.29777	0.992448	-0.69804
00000001_4.tif	control	IV111	CEPrescue	13.776	9.526	5.67716	2.52453	-3.15263	0	0.29777	0.751728	-0.93876
00000001_4.tif	control	IV111	CEPrescue	13.859	10.005	5.67716	2.1075	-3.56966	0	0.29777	0.62755	-1.06294
00000001_4.tif	control	IV111	CEPrescue	13.911	9.901	5.67716	2.14899	-3.52817	0	0.29777	0.639904	-1.05058
00000001_4.tif	control	IV111	CEPrescue	14.071	8.28	5.67716	3.47442	-2.20274	0	0.29777	1.03458	-0.65591
00000001_4.tif	control	IV111	CEPrescue	14.196	8.391	5.67716	3.32671	-2.35045	0	0.29777	0.990596	-0.699892
00000001_4.tif	control	IV111	CEPrescue	14.964	17.047	5.67716	5.53765	-0.139511	0	0.29777	1.64895	-0.0415423
00000001_4.tif	control	IV111	CEPrescue	15.078	14.38	5.67716	2.86948	-2.80768	0	0.29777	0.854445	-0.836043
00000001_4.tif	control	IV111	CEPrescue	15.078	7.828	5.67716	3.70112	-1.97604	0	0.29777	1.10208	-0.588406
00000001_4.tif	control	IV111	CEPrescue	15.967	5.891	5.67716	5.66671	-0.0104473	0	0.29777	1.68738	-0.0031109
00000001_4.tif	control	IV111	CEPrescue	16.092	5.203	5.67716	6.36463	0.687467	1	0.29777	1.8952	0.204707
00000001_4.tif	control	IV111	CEPrescue	16.3	14.627	5.67716	3.25604	-2.42113	0	0.29777	0.96955	-0.720938
00000001_4.tif	control	IV111	CEPrescue	16.425	8.717	5.67716	3.01278	-2.66438	0	0.29777	0.897114	-0.793374
00000001_4.tif	control	IV111	CEPrescue	16.481	9.377	5.67716	2.43674	-3.24042	0	0.29777	0.725588	-0.9649
00000001_4.tif	control	IV111	CEPrescue	16.842	9.328	5.67716	2.6677	-3.00946	0	0.29777	0.79436	-0.896128
00000001_4.tif	control	IV111	CEPrescue	16.988	8.189	5.67716	3.72484	-1.95232	0	0.29777	1.10915	-0.581342
00000001_4.tif	control	IV111	CEPrescue	17.099	7.981	5.67716	3.96053	-1.71663	0	0.29777	1.17933	-0.511162
00000001_4.tif	control	IV111	CEPrescue	17.106	17.391	5.67716	6.13482	0.457657	1	0.29777	1.82676	0.136277
00000001_4.tif	control	IV111	CEPrescue	17.259	17.252	5.67716	6.04917	0.37201	1	0.29777	1.80126	0.110773
00000001_4.tif	control	IV111	CEPrescue	17.363	15.238	5.67716	4.24001	-1.43715	0	0.29777	1.26255	-0.42794
00000001_4.tif	control	IV111	CEPrescue	17.495	6.432	5.67716	5.53313	-0.144032	0	0.29777	1.6476	-0.0428885
00000001_4.tif	control	IV111	CEPrescue	17.564	17.446	5.67716	6.33464	0.657483	1	0.29777	1.88627	0.195779
00000001_4.tif	control	IV111	CEPrescue	17.932	15.835	5.67716	5.04157	-0.635585	0	0.29777	1.50123	-0.189258
00000001_4.tif	control	IV111	CEPrescue	18.172	14.981	5.67716	4.48201	-1.19515	0	0.29777	1.33461	-0.35588
00000001_4.tif	control	IV111	CEPrescue	18.207	15.481	5.67716	4.89888	-0.778277	0	0.29777	1.45874	-0.231748
00000001_4.tif	control	IV111	CEPrescue	18.248	10.835	5.67716	3.00437	-2.67279	0	0.29777	0.89461	-0.795878
00000001_4.tif	control	IV111	CEPrescue	18.339	15.391	5.67716	4.90644	-0.77072	0	0.29777	1.46099	-0.229497
00000001_4.tif	control	IV111	CEPrescue	18.429	11.995	5.67716	3.14196	-2.5352	0	0.29777	0.935581	-0.754907
00000001_4.tif	control	IV111	CEPrescue	18.429	11.432	5.67716	3.10727	-2.56989	0	0.29777	0.925253	-0.765235
00000001_4.tif	control	IV111	CEPrescue	18.443	15.613	5.67716	5.14576	-0.531399	0	0.29777	1.53225	-0.158235
00000001_4.tif	control	IV111	CEPrescue	18.45	12.217	5.67716	3.20352	-2.47364	0	0.29777	0.953912	-0.736576
00000001_4.tif	control	IV111	CEPrescue	18.457	5.911	5.67716	6.42605	0.748885	1	0.29777	1.91348	0.222995
00000001_4.tif	control	IV111	CEPrescue	18.547	15.606	5.67716	5.20398	-0.473181	0	0.29777	1.54959	-0.140899
00000001_4.tif	control	IV111	CEPrescue	19.311	12.516	5.67716	4.11025	-1.56691	0	0.29777	1.22391	-0.466578
00000001_4.tif	control	IV111	CEPrescue	19.498	12.898	5.67716	4.39622	-1.28094	0	0.29777	1.30906	-0.381425
00000001_4.tif	control	IV111	CEPrescue	19.769	12.161	5.67716	4.49183	-1.18533	0	0.29777	1.33753	-0.352956
00000001_4.tif	control	IV111	CEPrescue	20.172	10.214	5.67716	5.02206	-0.655104	0	0.29777	1.49542	-0.19507
00000001_4.tif	control	IV111	CEPrescue	20.255	10.109	5.67716	5.13014	-0.547017	0	0.29777	1.5276	-0.162885
00000001_4.tif	control	IV111	CEPrescue	20.366	10.179	5.67716	5.21851	-0.458654	0	0.29777	1.55391	-0.136573
00000001_4.tif	control	IV111	CEPrescue	20.498	16.012	5.67716	6.85199	1.17483	1	0.29777	2.04032	0.349828
00000001_4.tif	control	IV111	CEPrescue	20.554	12.759	5.67716	5.3755	-0.30166	0	0.29777	1.60066	-0.0898253
00000001_4.tif	control	IV111	CEPrescue	20.623	12.648	5.67716	5.4185	-0.258662	0	0.29777	1.61347	-0.0770216
00000001_4.tif	control	IV111	CEPrescue	20.72	16.609	5.67716	7.41723	1.74007	1	0.29777	2.20863	0.518142
00000001_4.tif	control	IV111	CEPrescue	20.797	14.089	5.67716	6.04643	0.369268	1	0.29777	1.80045	0.109957
00000001_4.tif	control	IV111	CEPrescue	20.845	14.762	5.67716	6.40286	0.725696	1	0.29777	1.90658	0.21609
00000001_4.tif	control	IV111	CEPrescue	20.936	13.422	5.67716	5.92618	0.249016	1	0.29777	1.76464	0.0741496
00000001_4.tif	control	IV111	CEPrescue	20.984	14.616	5.67716	6.45182	0.774657	1	0.29777	1.92116	0.23067
00000001_4.tif	control	IV111	CEPrescue	21.318	16.061	5.67716	7.52008	1.84292	1	0.29777	2.23925	0.548767
00000001_4.tif	control	IV111	CEPrescue	21.464	13.262	5.67716	6.38302	0.705861	1	0.29777	1.90067	0.210184
00000001_4.tif	control	IV111	CEPrescue	22.047	15.658	5.67716	7.89474	2.21758	1	0.29777	2.35082	0.660329
00000001_4.tif	control	IV111	CEPrescue	22.116	17.637	5.67716	9.14059	3.46343	1	0.29777	2.72179	1.0313
00000001_4.tif	control	IV111	CEPrescue	22.262	17.797	5.67716	9.35617	3.67901	1	0.29777	2.78599	1.0955
00000001_4.tif	control	IV111	CEPrescue	23.2	13.665	5.67716	8.16357	2.48641	1	0.29777	2.43087	0.740378
00000001_8.tif	predator	IV111	CEPrescue	3.988	12.873	5.40118	10.0954	4.69426	1	0.29777	3.00612	1.39781
00000001_8.tif	predator	IV111	CEPrescue	4.161	11.332	5.40118	9.90963	4.50845	1	0.29777	2.95079	1.34248
00000001_8.tif	predator	IV111	CEPrescue	4.675	12.095	5.40118	9.37233	3.97115	1	0.29777	2.7908	1.18249
00000001_8.tif	predator	IV111	CEPrescue	4.689	10.241	5.40118	9.52485	4.12367	1	0.29777	2.83621	1.2279
00000001_8.tif	predator	IV111	CEPrescue	4.96	15.123	5.40118	9.60349	4.20231	1	0.29777	2.85963	1.25132
00000001_8.tif	predator	IV111	CEPrescue	5.002	13.318	5.40118	9.13823	3.73705	1	0.29777	2.72109	1.11278
00000001_8.tif	predator	IV111	CEPrescue	5.064	13.401	5.40118	9.08914	3.68796	1	0.29777	2.70647	1.09816
00000001_8.tif	predator	IV111	CEPrescue	5.273	12.602	5.40118	8.79355	3.39236	1	0.29777	2.61845	1.01014
00000001_8.tif	predator	IV111	CEPrescue	5.293	11.352	5.40118	8.77915	3.37796	1	0.29777	2.61417	1.00586
00000001_8.tif	predator	IV111	CEPrescue	5.467	9.519	5.40118	8.93596	3.53478	1	0.29777	2.66086	1.05255
00000001_8.tif	predator	IV111	CEPrescue	5.592	9.304	5.40118	8.8793	3.47812	1	0.29777	2.64399	1.03568
00000001_8.tif	predator	IV111	CEPrescue	5.78	9.095	5.40118	8.76787	3.36669	1	0.29777	2.61081	1.0025
00000001_8.tif	predator	IV111	CEPrescue	5.807	9.915	5.40118	8.50363	3.10245	1	0.29777	2.53213	0.923817
00000001_8.tif	predator	IV111	CEPrescue	6.312	6.385	5.40118	9.56757	4.16639	1	0.29777	2.84894	1.24062
00000001_8.tif	predator	IV111	CEPrescue	6.446	16.332	5.40118	8.74088	3.3397	1	0.29777	2.60277	0.994463
00000001_8.tif	predator	IV111	CEPrescue	6.488	17.082	5.40118	9.09961	3.69842	1	0.29777	2.70959	1.10128
00000001_8.tif	predator	IV111	CEPrescue	6.519	16.901	5.40118	8.97407	3.57289	1	0.29777	2.67221	1.0639
00000001_8.tif	predator	IV111	CEPrescue	6.717	9.686	5.40118	7.69141	2.29023	1	0.29777	2.29027	0.681961
00000001_8.tif	predator	IV111	CEPrescue	6.724	10.401	5.40118	7.49897	2.09779	1	0.29777	2.23297	0.624658
00000001_8.tif	predator	IV111	CEPrescue	6.828	15.568	5.40118	8.04554	2.64435	1	0.29777	2.39572	0.787409
00000001_8.tif	predator	IV111	CEPrescue	6.87	9.693	5.40118	7.54358	2.1424	1	0.29777	2.24625	0.637943
00000001_8.tif	predator	IV111	CEPrescue	6.932	9.498	5.40118	7.54742	2.14624	1	0.29777	2.2474	0.639085
00000001_8.tif	predator	IV111	CEPrescue	6.936	13.898	5.40118	7.35583	1.95465	1	0.29777	2.19035	0.582035
00000001_8.tif	predator	IV111	CEPrescue	7.026	13.807	5.40118	7.24583	1.84465	1	0.29777	2.15759	0.549282
00000001_8.tif	predator	IV111	CEPrescue	7.033	14.453	5.40118	7.42531	2.02412	1	0.29777	2.21103	0.602723
00000001_8.tif	predator	IV111	CEPrescue	7.283	3.78	5.40118	10.6576	5.25637	1	0.29777	3.1735	1.56519
00000001_8.tif	predator	IV111	CEPrescue	8.026	6.533	5.40118	8.14345	2.74226	1	0.29777	2.42487	0.816564
00000001_8.tif	predator	IV111	CEPrescue	8.054	6.714	5.40118	8.0017	2.60052	1	0.29777	2.38267	0.774357
00000001_8.tif	predator	IV111	CEPrescue	8.186	3.745	5.40118	10.1371	4.73591	1	0.29777	3.01852	1.41021
00000001_8.tif	predator	IV111	CEPrescue	8.373	11.679	5.40118	5.684	0.282816	1	0.29777	1.69252	0.084214
00000001_8.tif	predator	IV111	CEPrescue	8.429	11.616	5.40118	5.63222	0.231038	1	0.29777	1.67711	0.0687963
00000001_8.tif	predator	IV111	CEPrescue	8.762	19.227	5.40118	8.94034	3.53916	1	0.29777	2.66217	1.05386
00000001_8.tif	predator	IV111	CEPrescue	8.769	18.762	5.40118	8.56538	3.1642	1	0.29777	2.55051	0.942204
00000001_8.tif	predator	IV111	CEPrescue	8.783	11.866	5.40118	5.26614	-0.135047	0	0.29777	1.5681	-0.0402129
00000001_8.tif	predator	IV111	CEPrescue	8.922	19.158	5.40118	8.79055	3.38937	1	0.29777	2.61756	1.00925
00000001_8.tif	predator	IV111	CEPrescue	8.943	3.8	5.40118	9.6723	4.27112	1	0.29777	2.88012	1.27181
00000001_8.tif	predator	IV111	CEPrescue	9.061	12.925	5.40118	5.06818	-0.333001	0	0.29777	1.50915	-0.0991576
00000001_8.tif	predator	IV111	CEPrescue	9.304	12.87	5.40118	4.81927	-0.581913	0	0.29777	1.43503	-0.173276
00000001_8.tif	predator	IV111	CEPrescue	9.408	12.075	5.40118	4.63938	-0.761808	0	0.29777	1.38147	-0.226844
00000001_8.tif	predator	IV111	CEPrescue	9.901	11.491	5.40118	4.17911	-1.22208	0	0.29777	1.24441	-0.363898
00000001_8.tif	predator	IV111	CEPrescue	9.964	17.47	5.40118	6.813	1.41182	1	0.29777	2.02871	0.420397
00000001_8.tif	predator	IV111	CEPrescue	10.019	17.533	5.40118	6.83096	1.42978	1	0.29777	2.03406	0.425746
00000001_8.tif	predator	IV111	CEPrescue	10.269	20.422	5.40118	9.21597	3.81479	1	0.29777	2.74424	1.13593
00000001_8.tif	predator	IV111	CEPrescue	10.352	20.318	5.40118	9.08715	3.68596	1	0.29777	2.70588	1.09757
00000001_8.tif	predator	IV111	CEPrescue	10.38	11.561	5.40118	3.69512	-1.70606	0	0.29777	1.1003	-0.508014
00000001_8.tif	predator	IV111	CEPrescue	10.616	11.109	5.40118	3.54886	-1.85232	0	0.29777	1.05674	-0.551566
00000001_8.tif	predator	IV111	CEPrescue	10.741	18.061	5.40118	6.88997	1.48878	1	0.29777	2.05163	0.443315
00000001_8.tif	predator	IV111	CEPrescue	10.811	17.95	5.40118	6.759	1.35781	1	0.29777	2.01263	0.404316
00000001_8.tif	predator	IV111	CEPrescue	11.182	1.835	5.40118	10.5764	5.17525	1	0.29777	3.14935	1.54103
00000001_8.tif	predator	IV111	CEPrescue	11.328	8.72	5.40118	4.27277	-1.12841	0	0.29777	1.2723	-0.336007
00000001_8.tif	predator	IV111	CEPrescue	11.432	10.245	5.40118	3.15827	-2.24291	0	0.29777	0.940438	-0.667873
00000001_8.tif	predator	IV111	CEPrescue	12.064	7.679	5.40118	4.76884	-0.632341	0	0.29777	1.42002	-0.188292
00000001_8.tif	predator	IV111	CEPrescue	12.134	7.873	5.40118	4.56333	-0.837849	0	0.29777	1.35882	-0.249486
00000001_8.tif	predator	IV111	CEPrescue	12.398	11.016	5.40118	1.92852	-3.47266	0	0.29777	0.574256	-1.03405
00000001_8.tif	predator	IV111	CEPrescue	14.092	19.557	5.40118	7.54113	2.13995	1	0.29777	2.24552	0.637213
00000001_8.tif	predator	IV111	CEPrescue	14.12	18.911	5.40118	6.89539	1.4942	1	0.29777	2.05324	0.444929
00000001_8.tif	predator	IV111	CEPrescue	14.189	6.068	5.40118	5.94969	0.548511	1	0.29777	1.77164	0.16333
00000001_8.tif	predator	IV111	CEPrescue	14.21	19.356	5.40118	7.34181	1.94063	1	0.29777	2.18617	0.57786
00000001_8.tif	predator	IV111	CEPrescue	14.62	18.863	5.40118	6.87093	1.46975	1	0.29777	2.04596	0.437648
00000001_8.tif	predator	IV111	CEPrescue	14.641	5.352	5.40118	6.69042	1.28924	1	0.29777	1.99221	0.383896
00000001_8.tif	predator	IV111	CEPrescue	14.87	19.8	5.40118	7.82739	2.4262	1	0.29777	2.33076	0.722451
00000001_8.tif	predator	IV111	CEPrescue	15.002	5.401	5.40118	6.68358	1.2824	1	0.29777	1.99017	0.381859
00000001_8.tif	predator	IV111	CEPrescue	15.078	5.88	5.40118	6.22201	0.82083	1	0.29777	1.85273	0.244419
00000001_8.tif	predator	IV111	CEPrescue	15.148	5.811	5.40118	6.30192	0.900739	1	0.29777	1.87652	0.268213
00000001_8.tif	predator	IV111	CEPrescue	15.286	2.96	5.40118	9.14036	3.73918	1	0.29777	2.72173	1.11342
00000001_8.tif	predator	IV111	CEPrescue	15.564	5.984	5.40118	6.21983	0.818649	1	0.29777	1.85208	0.243769
00000001_8.tif	predator	IV111	CEPrescue	15.703	6.13	5.40118	6.11452	0.713335	1	0.29777	1.82072	0.21241
00000001_8.tif	predator	IV111	CEPrescue	16.161	4.342	5.40118	7.95985	2.55867	1	0.29777	2.37021	0.761895
00000001_8.tif	predator	IV111	CEPrescue	16.613	20.526	5.40118	8.88845	3.48726	1	0.29777	2.64671	1.0384
00000001_8.tif	predator	IV111	CEPrescue	16.884	9.849	5.40118	3.56994	-1.83125	0	0.29777	1.06302	-0.54529
00000001_8.tif	predator	IV111	CEPrescue	17.196	9.585	5.40118	3.97819	-1.423	0	0.29777	1.18458	-0.423726
00000001_8.tif	predator	IV111	CEPrescue	17.262	8.526	5.40118	4.74514	-0.656046	0	0.29777	1.41296	-0.195351
00000001_8.tif	predator	IV111	CEPrescue	17.818	6.359	5.40118	6.79868	1.3975	1	0.29777	2.02444	0.416133
00000001_8.tif	predator	IV111	CEPrescue	17.839	16.446	5.40118	5.83131	0.430125	1	0.29777	1.73639	0.128078
00000001_8.tif	predator	IV111	CEPrescue	18.089	4.321	5.40118	8.692	3.29081	1	0.29777	2.58822	0.979905
00000001_8.tif	predator	IV111	CEPrescue	18.304	4.064	5.40118	9.01978	3.61859	1	0.29777	2.68582	1.07751
00000001_8.tif	predator	IV111	CEPrescue	18.637	18.023	5.40118	7.5599	2.15872	1	0.29777	2.25111	0.642802
00000001_8.tif	predator	IV111	CEPrescue	18.762	17.724	5.40118	7.40355	2.00236	1	0.29777	2.20455	0.596243
00000001_8.tif	predator	IV111	CEPrescue	19.318	8.13	5.40118	6.54862	1.14744	1	0.29777	1.94998	0.341672
00000001_8.tif	predator	IV111	CEPrescue	19.401	7.957	5.40118	6.71869	1.31751	1	0.29777	2.00062	0.392314
00000001_8.tif	predator	IV111	CEPrescue	19.832	7.366	5.40118	7.42218	2.02099	1	0.29777	2.2101	0.601792
00000001_8.tif	predator	IV111	CEPrescue	19.984	17.481	5.40118	8.06934	2.66815	1	0.29777	2.40281	0.794496
00000001_8.tif	predator	IV111	CEPrescue	20.214	17.53	5.40118	8.27261	2.87143	1	0.29777	2.46334	0.855025
00000001_8.tif	predator	IV111	CEPrescue	20.248	18.05	5.40118	8.65226	3.25107	1	0.29777	2.57638	0.968072
00000001_8.tif	predator	IV111	CEPrescue	20.373	8.738	5.40118	7.12486	1.72367	1	0.29777	2.12157	0.513258
00000001_8.tif	predator	IV111	CEPrescue	20.595	12.915	5.40118	6.60943	1.20824	1	0.29777	1.96809	0.359778
00000001_8.tif	predator	IV111	CEPrescue	20.922	7.241	5.40118	8.37056	2.96938	1	0.29777	2.4925	0.884191
00000001_8.tif	predator	IV111	CEPrescue	21.224	17.88	5.40118	9.268	3.86682	1	0.29777	2.75973	1.15142
00000001_8.tif	predator	IV111	CEPrescue	21.356	11.599	5.40118	7.32089	1.9197	1	0.29777	2.17994	0.57163
00000001_8.tif	predator	IV111	CEPrescue	21.689	6.679	5.40118	9.32114	3.91996	1	0.29777	2.77556	1.16725
00000001_8.tif	predator	IV111	CEPrescue	21.766	11.078	5.40118	7.77578	2.3746	1	0.29777	2.31539	0.707085
00000001_8.tif	predator	IV111	CEPrescue	22.057	10.286	5.40118	8.19469	2.79351	1	0.29777	2.44013	0.831823
00000001_8.tif	predator	IV111	CEPrescue	22.175	10.335	5.40118	8.30001	2.89883	1	0.29777	2.47149	0.863183
00000001_8.tif	predator	IV111	CEPrescue	22.835	12.911	5.40118	8.83346	3.43227	1	0.29777	2.63034	1.02203
00000001_9.tif	control	IV552	APDErescue	6.656	16.802	4.3492	8.57489	4.22569	1	0.29777	2.55335	1.25828
00000001_9.tif	control	IV552	APDErescue	6.661	16.484	4.3492	8.40979	4.06059	1	0.29777	2.50418	1.20912
00000001_9.tif	control	IV552	APDErescue	6.932	16.13	4.3492	8.00167	3.65246	1	0.29777	2.38266	1.08759
00000001_9.tif	control	IV552	APDErescue	7.099	16.641	4.3492	8.11323	3.76403	1	0.29777	2.41588	1.12081
00000001_9.tif	control	IV552	APDErescue	7.766	15.266	4.3492	6.86822	2.51901	1	0.29777	2.04515	0.750087
00000001_9.tif	control	IV552	APDErescue	7.908	7.637	4.3492	7.689	3.3398	1	0.29777	2.28955	0.994491
00000001_9.tif	control	IV552	APDErescue	7.977	10.193	4.3492	6.38219	2.03299	1	0.29777	1.90043	0.605363
00000001_9.tif	control	IV552	APDErescue	8.276	15.339	4.3492	6.44371	2.0945	1	0.29777	1.91874	0.623681
00000001_9.tif	control	IV552	APDErescue	8.283	9.408	4.3492	6.4149	2.06569	1	0.29777	1.91016	0.615101
00000001_9.tif	control	IV552	APDErescue	8.401	19.286	4.3492	8.9046	4.55539	1	0.29777	2.65152	1.35646
00000001_9.tif	control	IV552	APDErescue	9.047	13.141	4.3492	5.00012	0.650921	1	0.29777	1.48889	0.193825
00000001_9.tif	control	IV552	APDErescue	9.182	14.026	4.3492	5.08641	0.737204	1	0.29777	1.51458	0.219517
00000001_9.tif	control	IV552	APDErescue	9.193	17.425	4.3492	6.97993	2.63073	1	0.29777	2.07841	0.783352
00000001_9.tif	control	IV552	APDErescue	9.262	17.28	4.3492	6.8273	2.4781	1	0.29777	2.03297	0.737903
00000001_9.tif	control	IV552	APDErescue	9.45	6.47	4.3492	7.42427	3.07507	1	0.29777	2.21073	0.915663
00000001_9.tif	control	IV552	APDErescue	9.498	9.325	4.3492	5.41006	1.06086	1	0.29777	1.61095	0.315892
00000001_9.tif	control	IV552	APDErescue	10.158	17.377	4.3492	6.31815	1.96895	1	0.29777	1.88136	0.586294
00000001_9.tif	control	IV552	APDErescue	10.172	11.102	4.3492	4.01078	-0.338423	0	0.29777	1.19429	-0.100772
00000001_9.tif	control	IV552	APDErescue	10.179	10.686	4.3492	4.15254	-0.196662	0	0.29777	1.2365	-0.0585601
00000001_9.tif	control	IV552	APDErescue	10.2	6.227	4.3492	7.19705	2.84785	1	0.29777	2.14307	0.848004
00000001_9.tif	control	IV552	APDErescue	10.227	17.217	4.3492	6.14918	1.79998	1	0.29777	1.83104	0.535981
00000001_9.tif	control	IV552	APDErescue	10.651	11.227	4.3492	3.51678	-0.832418	0	0.29777	1.04719	-0.247869
00000001_9.tif	control	IV552	APDErescue	10.797	6.769	4.3492	6.42599	2.07679	1	0.29777	1.91347	0.618405
00000001_9.tif	control	IV552	APDErescue	10.894	10.804	4.3492	3.45473	-0.894478	0	0.29777	1.02871	-0.266349
00000001_9.tif	control	IV552	APDErescue	10.922	12.189	4.3492	3.06618	-1.28303	0	0.29777	0.913016	-0.382046
00000001_9.tif	control	IV552	APDErescue	11.109	6.616	4.3492	6.41349	2.06429	1	0.29777	1.90975	0.614684
00000001_9.tif	control	IV552	APDErescue	11.116	10.776	4.3492	3.27105	-1.07816	0	0.29777	0.97402	-0.321042
00000001_9.tif	control	IV552	APDErescue	11.179	14.203	4.3492	3.36234	-0.986861	0	0.29777	1.0012	-0.293858
00000001_9.tif	control	IV552	APDErescue	11.332	13.523	4.3492	2.90024	-1.44896	0	0.29777	0.863604	-0.431458
00000001_9.tif	control	IV552	APDErescue	11.366	14.391	4.3492	3.32019	-1.02901	0	0.29777	0.988654	-0.306408
00000001_9.tif	control	IV552	APDErescue	11.415	14.655	4.3492	3.45216	-0.897044	0	0.29777	1.02795	-0.267113
00000001_9.tif	control	IV552	APDErescue	11.422	11.898	4.3492	2.60139	-1.74781	0	0.29777	0.774617	-0.520445
00000001_9.tif	control	IV552	APDErescue	11.79	15.023	4.3492	3.45889	-0.890314	0	0.29777	1.02995	-0.265109
00000001_9.tif	control	IV552	APDErescue	11.804	13.335	4.3492	2.39261	-1.95659	0	0.29777	0.712448	-0.582614
00000001_9.tif	control	IV552	APDErescue	11.811	14.453	4.3492	3.02469	-1.32451	0	0.29777	0.900662	-0.3944
00000001_9.tif	control	IV552	APDErescue	11.825	11.186	4.3492	2.45232	-1.89689	0	0.29777	0.730226	-0.564836
00000001_9.tif	control	IV552	APDErescue	11.957	17.523	4.3492	5.55689	1.20769	1	0.29777	1.65467	0.359612
00000001_9.tif	control	IV552	APDErescue	12.068	10.762	4.3492	2.4879	-1.86131	0	0.29777	0.740821	-0.554241
00000001_9.tif	control	IV552	APDErescue	12.082	13.571	4.3492	2.26073	-2.08848	0	0.29777	0.673177	-0.621885
00000001_9.tif	control	IV552	APDErescue	12.095	14.655	4.3492	2.98093	-1.36827	0	0.29777	0.887632	-0.40743
00000001_9.tif	control	IV552	APDErescue	12.151	11.873	4.3492	1.8938	-2.45541	0	0.29777	0.563916	-0.731146
00000001_9.tif	control	IV552	APDErescue	12.297	14.335	4.3492	2.60579	-1.74341	0	0.29777	0.775927	-0.519135
00000001_9.tif	control	IV552	APDErescue	12.297	10.964	4.3492	2.1827	-2.1665	0	0.29777	0.649944	-0.645119
00000001_9.tif	control	IV552	APDErescue	12.352	15.571	4.3492	3.61175	-0.737457	0	0.29777	1.07547	-0.219593
00000001_9.tif	control	IV552	APDErescue	12.45	20.411	4.3492	8.20664	3.85744	1	0.29777	2.44369	1.14863
00000001_9.tif	control	IV552	APDErescue	12.484	10.832	4.3492	2.13338	-2.21583	0	0.29777	0.635255	-0.659807
00000001_9.tif	control	IV552	APDErescue	12.533	18.891	4.3492	6.70098	2.35178	1	0.29777	1.99535	0.700289
00000001_9.tif	control	IV552	APDErescue	12.561	20.3	4.3492	8.07733	3.72813	1	0.29777	2.40519	1.11013
00000001_9.tif	control	IV552	APDErescue	12.575	5.839	4.3492	6.66073	2.31153	1	0.29777	1.98337	0.688305
00000001_9.tif	control	IV552	APDErescue	12.595	10.47	4.3492	2.33666	-2.01255	0	0.29777	0.695786	-0.599276
00000001_9.tif	control	IV552	APDErescue	12.665	13.877	4.3492	2.01855	-2.33065	0	0.29777	0.601064	-0.693998
00000001_9.tif	control	IV552	APDErescue	12.776	12.526	4.3492	1.2209	-3.1283	0	0.29777	0.363547	-0.931515
00000001_9.tif	control	IV552	APDErescue	12.852	10.859	4.3492	1.87124	-2.47797	0	0.29777	0.557198	-0.737864
00000001_9.tif	control	IV552	APDErescue	12.859	12.609	4.3492	1.15465	-3.19455	0	0.29777	0.343821	-0.951241
00000001_9.tif	control	IV552	APDErescue	12.866	12.29	4.3492	1.11956	-3.22965	0	0.29777	0.33337	-0.961692
00000001_9.tif	control	IV552	APDErescue	12.894	14.12	4.3492	2.07955	-2.26965	0	0.29777	0.619229	-0.675834
00000001_9.tif	control	IV552	APDErescue	12.901	10.679	4.3492	1.99042	-2.35878	0	0.29777	0.592689	-0.702373
00000001_9.tif	control	IV552	APDErescue	13.22	12.773	4.3492	0.873769	-3.47543	0	0.29777	0.260182	-1.03488
00000001_9.tif	control	IV552	APDErescue	13.644	19.068	4.3492	6.7276	2.37839	1	0.29777	2.00328	0.708214
00000001_9.tif	control	IV552	APDErescue	13.7	11.217	4.3492	1.16708	-3.18212	0	0.29777	0.347522	-0.94754
00000001_9.tif	control	IV552	APDErescue	13.783	12.175	4.3492	0.265851	-4.08335	0	0.29777	0.0791626	-1.2159
00000001_9.tif	control	IV552	APDErescue	13.901	13.46	4.3492	1.1141	-3.23511	0	0.29777	0.331744	-0.963318
00000001_9.tif	control	IV552	APDErescue	14.082	13.009	4.3492	0.667236	-3.68197	0	0.29777	0.198683	-1.09638
00000001_9.tif	control	IV552	APDErescue	14.165	11.349	4.3492	1.01625	-3.33295	0	0.29777	0.302608	-0.992454
00000001_9.tif	control	IV552	APDErescue	14.248	12.821	4.3492	0.540814	-3.80839	0	0.29777	0.161038	-1.13402
00000001_9.tif	control	IV552	APDErescue	14.422	11.127	4.3492	1.29812	-3.05108	0	0.29777	0.386543	-0.908519
00000001_9.tif	control	IV552	APDErescue	14.429	11.21	4.3492	1.22284	-3.12636	0	0.29777	0.364126	-0.930936
00000001_9.tif	control	IV552	APDErescue	14.45	11.53	4.3492	0.942293	-3.40691	0	0.29777	0.280587	-1.01448
00000001_9.tif	control	IV552	APDErescue	14.672	10.085	4.3492	2.36623	-1.98297	0	0.29777	0.704592	-0.59047
00000001_9.tif	control	IV552	APDErescue	14.672	11.335	4.3492	1.22537	-3.12383	0	0.29777	0.364879	-0.930183
00000001_9.tif	control	IV552	APDErescue	14.755	10.224	4.3492	2.26055	-2.08866	0	0.29777	0.673123	-0.621939
00000001_9.tif	control	IV552	APDErescue	14.783	10.036	4.3492	2.44711	-1.90209	0	0.29777	0.728677	-0.566385
00000001_9.tif	control	IV552	APDErescue	14.845	12.641	4.3492	0.909167	-3.44004	0	0.29777	0.270723	-1.02434
00000001_9.tif	control	IV552	APDErescue	14.866	12.05	4.3492	0.931303	-3.4179	0	0.29777	0.277314	-1.01775
00000001_9.tif	control	IV552	APDErescue	14.901	11.488	4.3492	1.25786	-3.09134	0	0.29777	0.374553	-0.920509
00000001_9.tif	control	IV552	APDErescue	14.908	10.62	4.3492	1.96041	-2.38879	0	0.29777	0.583752	-0.71131
00000001_9.tif	control	IV552	APDErescue	15.193	12.377	4.3492	1.20932	-3.13988	0	0.29777	0.3601	-0.934962
00000001_9.tif	control	IV552	APDErescue	15.332	13.707	4.3492	1.91344	-2.43576	0	0.29777	0.569766	-0.725296
00000001_9.tif	control	IV552	APDErescue	15.38	11.03	4.3492	1.92057	-2.42864	0	0.29777	0.571887	-0.723175
00000001_9.tif	control	IV552	APDErescue	15.387	12.182	4.3492	1.4129	-2.9363	0	0.29777	0.42072	-0.874342
00000001_9.tif	control	IV552	APDErescue	15.484	12.3	4.3492	1.5008	-2.8484	0	0.29777	0.446893	-0.848169
00000001_9.tif	control	IV552	APDErescue	15.575	10.099	4.3492	2.75568	-1.59352	0	0.29777	0.820559	-0.474503
00000001_9.tif	control	IV552	APDErescue	15.623	16.411	4.3492	4.3802	0.0309987	1	0.29777	1.30429	0.00923048
00000001_9.tif	control	IV552	APDErescue	15.672	11.655	4.3492	1.8251	-2.52411	0	0.29777	0.543459	-0.751603
00000001_9.tif	control	IV552	APDErescue	15.686	11.349	4.3492	1.97403	-2.37517	0	0.29777	0.587808	-0.707254
00000001_9.tif	control	IV552	APDErescue	15.714	4.991	4.3492	7.55864	3.20944	1	0.29777	2.25074	0.955675
00000001_9.tif	control	IV552	APDErescue	15.755	9.745	4.3492	3.14917	-1.20004	0	0.29777	0.937728	-0.357334
00000001_9.tif	control	IV552	APDErescue	15.783	12.509	4.3492	1.8061	-2.5431	0	0.29777	0.537803	-0.757259
00000001_9.tif	control	IV552	APDErescue	15.852	10.536	4.3492	2.60315	-1.74605	0	0.29777	0.77514	-0.519922
00000001_9.tif	control	IV552	APDErescue	15.901	4.943	4.3492	7.65008	3.30088	1	0.29777	2.27796	0.982902
00000001_9.tif	control	IV552	APDErescue	16.012	11.516	4.3492	2.19241	-2.15679	0	0.29777	0.652835	-0.642227
00000001_9.tif	control	IV552	APDErescue	16.019	12.259	4.3492	2.03699	-2.31221	0	0.29777	0.606554	-0.688508
00000001_9.tif	control	IV552	APDErescue	16.22	16.842	4.3492	5.01864	0.669437	1	0.29777	1.4944	0.199338
00000001_9.tif	control	IV552	APDErescue	16.241	16.731	4.3492	4.92909	0.579892	1	0.29777	1.46774	0.172674
00000001_9.tif	control	IV552	APDErescue	16.394	10.668	4.3492	2.93834	-1.41086	0	0.29777	0.87495	-0.420112
00000001_9.tif	control	IV552	APDErescue	16.491	10.224	4.3492	3.28644	-1.06276	0	0.29777	0.978603	-0.31646
00000001_9.tif	control	IV552	APDErescue	16.602	10.502	4.3492	3.20396	-1.14525	0	0.29777	0.954042	-0.34102
00000001_9.tif	control	IV552	APDErescue	16.727	14.609	4.3492	3.5541	-0.7951	0	0.29777	1.05831	-0.236757
00000001_9.tif	control	IV552	APDErescue	16.748	14.123	4.3492	3.28432	-1.06488	0	0.29777	0.977973	-0.31709
00000001_9.tif	control	IV552	APDErescue	16.762	10.523	4.3492	3.32439	-1.02481	0	0.29777	0.989903	-0.305159
00000001_9.tif	control	IV552	APDErescue	16.845	13.97	4.3492	3.28831	-1.0609	0	0.29777	0.979159	-0.315903
00000001_9.tif	control	IV552	APDErescue	16.908	20.762	4.3492	8.90665	4.55744	1	0.29777	2.65213	1.35707
00000001_9.tif	control	IV552	APDErescue	16.964	13.977	4.3492	3.3957	-0.953502	0	0.29777	1.01114	-0.283924
00000001_9.tif	control	IV552	APDErescue	17.818	11.405	4.3492	3.94851	-0.400698	0	0.29777	1.17575	-0.119316
00000001_9.tif	control	IV552	APDErescue	18.012	4.922	4.3492	8.44897	4.09977	1	0.29777	2.51585	1.22079
00000001_9.tif	control	IV552	APDErescue	18.026	4.79	4.3492	8.57183	4.22263	1	0.29777	2.55243	1.25737
00000001_9.tif	control	IV552	APDErescue	18.026	13.325	4.3492	4.15817	-0.191037	0	0.29777	1.23818	-0.0568852
00000001_9.tif	control	IV552	APDErescue	18.352	5.957	4.3492	7.7419	3.3927	1	0.29777	2.30531	1.01024
00000001_9.tif	control	IV552	APDErescue	19.102	17.161	4.3492	7.0249	2.6757	1	0.29777	2.09181	0.796743
00000001_9.tif	control	IV552	APDErescue	19.207	7.675	4.3492	7.00899	2.65979	1	0.29777	2.08707	0.792006
00000001_9.tif	control	IV552	APDErescue	19.241	6.582	4.3492	7.80348	3.45428	1	0.29777	2.32364	1.02858
00000001_9.tif	control	IV552	APDErescue	19.526	17.335	4.3492	7.45479	3.10559	1	0.29777	2.21981	0.924752
00000001_9.tif	control	IV552	APDErescue	19.762	7.668	4.3492	7.4362	3.087	1	0.29777	2.21428	0.919215
00000001_9.tif	control	IV552	APDErescue	19.769	8.175	4.3492	7.13362	2.78441	1	0.29777	2.12418	0.829115
00000001_9.tif	control	IV552	APDErescue	19.832	14.262	4.3492	6.15294	1.80374	1	0.29777	1.83216	0.537099
00000001_9.tif	control	IV552	APDErescue	20.283	8.991	4.3492	7.13818	2.78897	1	0.29777	2.12553	0.830473
00000001_9.tif	control	IV552	APDErescue	20.45	6.464	4.3492	8.74313	4.39393	1	0.29777	2.60344	1.30838
00000001_9.tif	control	IV552	APDErescue	20.582	4.245	4.3492	10.4503	6.10108	1	0.29777	3.11178	1.81672
00000001_9.tif	control	IV552	APDErescue	20.672	4.349	4.3492	10.4273	6.07813	1	0.29777	3.10495	1.80989
00000001_9.tif	control	IV552	APDErescue	20.734	7.234	4.3492	8.4691	4.1199	1	0.29777	2.52185	1.22678
00000001_9.tif	control	IV552	APDErescue	21.089	9.422	4.3492	7.68429	3.33509	1	0.29777	2.28815	0.99309
00000001_9.tif	control	IV552	APDErescue	21.561	5.411	4.3492	10.2736	5.92439	1	0.29777	3.05917	1.76411
00000002_4.tif	predator	CB1112	cat2(e1112)	10.984	12.599	5.23965	5.05648	-0.183166	0	0.29777	1.50567	-0.0545413
00000002_4.tif	predator	CB1112	cat2(e1112)	11.575	10.075	5.23965	4.30651	-0.933134	0	0.29777	1.28235	-0.277859
00000002_4.tif	predator	CB1112	cat2(e1112)	11.578	12.516	5.23965	4.46805	-0.771598	0	0.29777	1.33045	-0.229759
00000002_4.tif	predator	CB1112	cat2(e1112)	11.589	13.109	5.23965	4.69263	-0.547021	0	0.29777	1.39732	-0.162886
00000002_4.tif	predator	CB1112	cat2(e1112)	11.651	15.224	5.23965	5.90754	0.667896	1	0.29777	1.75909	0.198879
00000002_4.tif	predator	CB1112	cat2(e1112)	11.839	11.45	5.23965	3.9676	-1.27205	0	0.29777	1.18143	-0.378777
00000002_4.tif	predator	CB1112	cat2(e1112)	12.255	11.727	5.23965	3.60017	-1.63948	0	0.29777	1.07202	-0.488188
00000002_4.tif	predator	CB1112	cat2(e1112)	12.554	10.477	5.23965	3.26911	-1.97054	0	0.29777	0.973442	-0.586768
00000002_4.tif	predator	CB1112	cat2(e1112)	12.72	12.672	5.23965	3.48788	-1.75177	0	0.29777	1.03859	-0.521624
00000002_4.tif	predator	CB1112	cat2(e1112)	12.804	8.158	5.23965	4.11576	-1.12389	0	0.29777	1.22555	-0.33466
00000002_4.tif	predator	CB1112	cat2(e1112)	12.825	12.22	5.23965	3.19786	-2.04178	0	0.29777	0.952228	-0.607982
00000002_4.tif	predator	CB1112	cat2(e1112)	12.929	8.609	5.23965	3.72166	-1.51798	0	0.29777	1.1082	-0.45201
00000002_4.tif	predator	CB1112	cat2(e1112)	13.109	16.964	5.23965	6.5352	1.29556	1	0.29777	1.94599	0.385778
00000002_4.tif	predator	CB1112	cat2(e1112)	13.165	12.491	5.23965	3.01107	-2.22858	0	0.29777	0.896606	-0.663604
00000002_4.tif	predator	CB1112	cat2(e1112)	13.182	16.151	5.23965	5.76954	0.529893	1	0.29777	1.718	0.157786
00000002_4.tif	predator	CB1112	cat2(e1112)	13.29	8.7	5.23965	3.39044	-1.84921	0	0.29777	1.00957	-0.550639
00000002_4.tif	predator	CB1112	cat2(e1112)	13.373	11.547	5.23965	2.46935	-2.7703	0	0.29777	0.735297	-0.824913
00000002_4.tif	predator	CB1112	cat2(e1112)	13.457	11.519	5.23965	2.38125	-2.8584	0	0.29777	0.709064	-0.851146
00000002_4.tif	predator	CB1112	cat2(e1112)	13.568	10.186	5.23965	2.35796	-2.88169	0	0.29777	0.702129	-0.858081
00000002_4.tif	predator	CB1112	cat2(e1112)	13.589	12.075	5.23965	2.44141	-2.79824	0	0.29777	0.726979	-0.833231
00000002_4.tif	predator	CB1112	cat2(e1112)	13.616	10.345	5.23965	2.26191	-2.97773	0	0.29777	0.67353	-0.88668
00000002_4.tif	predator	CB1112	cat2(e1112)	13.637	10.505	5.23965	2.2004	-3.03925	0	0.29777	0.655213	-0.904997
00000002_4.tif	predator	CB1112	cat2(e1112)	13.658	10.165	5.23965	2.28131	-2.95834	0	0.29777	0.679304	-0.880906
00000002_4.tif	predator	CB1112	cat2(e1112)	13.7	11.526	5.23965	2.14645	-3.0932	0	0.29777	0.639148	-0.921062
00000002_4.tif	predator	CB1112	cat2(e1112)	13.866	12.602	5.23965	2.49672	-2.74292	0	0.29777	0.743449	-0.816761
00000002_4.tif	predator	CB1112	cat2(e1112)	14.061	7.477	5.23965	3.92045	-1.3192	0	0.29777	1.16739	-0.392818
00000002_4.tif	predator	CB1112	cat2(e1112)	14.387	12.033	5.23965	1.73503	-3.50462	0	0.29777	0.51664	-1.04357
00000002_4.tif	predator	CB1112	cat2(e1112)	14.651	11.658	5.23965	1.30762	-3.93203	0	0.29777	0.389369	-1.17084
00000002_4.tif	predator	CB1112	cat2(e1112)	14.656	20.312	5.23965	9.37971	4.14006	1	0.29777	2.793	1.23279
00000002_4.tif	predator	CB1112	cat2(e1112)	14.748	8.276	5.23965	2.91329	-2.32636	0	0.29777	0.867491	-0.692719
00000002_4.tif	predator	CB1112	cat2(e1112)	14.894	13.262	5.23965	2.42969	-2.80995	0	0.29777	0.72349	-0.83672
00000002_4.tif	predator	CB1112	cat2(e1112)	15.359	12.707	5.23965	1.75839	-3.48126	0	0.29777	0.523596	-1.03661
00000002_4.tif	predator	CB1112	cat2(e1112)	15.38	7.755	5.23965	3.26968	-1.96996	0	0.29777	0.973613	-0.586596
00000002_4.tif	predator	CB1112	cat2(e1112)	15.415	8.512	5.23965	2.51478	-2.72487	0	0.29777	0.748825	-0.811385
00000002_4.tif	predator	CB1112	cat2(e1112)	15.498	8.637	5.23965	2.37989	-2.85976	0	0.29777	0.708659	-0.851551
00000002_4.tif	predator	CB1112	cat2(e1112)	15.589	8.644	5.23965	2.36381	-2.87584	0	0.29777	0.703872	-0.856338
00000002_4.tif	predator	CB1112	cat2(e1112)	15.769	10.564	5.23965	0.436165	-4.80348	0	0.29777	0.129877	-1.43033
00000002_4.tif	predator	CB1112	cat2(e1112)	15.776	10.384	5.23965	0.61602	-4.62363	0	0.29777	0.183432	-1.37678
00000002_4.tif	predator	CB1112	cat2(e1112)	15.957	13.29	5.23965	2.29675	-2.94289	0	0.29777	0.683904	-0.876306
00000002_4.tif	predator	CB1112	cat2(e1112)	16.137	12.936	5.23965	1.96846	-3.27119	0	0.29777	0.586148	-0.974062
00000002_4.tif	predator	CB1112	cat2(e1112)	16.543	11.498	5.23965	0.910301	-4.32935	0	0.29777	0.27106	-1.28915
00000002_4.tif	predator	CB1112	cat2(e1112)	16.55	9.564	5.23965	1.62894	-3.6107	0	0.29777	0.485051	-1.07516
00000002_4.tif	predator	CB1112	cat2(e1112)	16.675	8.842	5.23965	2.33585	-2.9038	0	0.29777	0.695546	-0.864664
00000002_4.tif	predator	CB1112	cat2(e1112)	16.689	9.092	5.23965	2.11304	-3.12661	0	0.29777	0.629199	-0.931011
00000002_4.tif	predator	CB1112	cat2(e1112)	16.745	17.401	5.23965	6.47318	1.23354	1	0.29777	1.92752	0.36731
00000002_4.tif	predator	CB1112	cat2(e1112)	17.155	11.429	5.23965	1.43942	-3.80023	0	0.29777	0.428615	-1.1316
00000002_4.tif	predator	CB1112	cat2(e1112)	17.161	12.72	5.23965	2.20518	-3.03447	0	0.29777	0.656635	-0.903575
00000002_4.tif	predator	CB1112	cat2(e1112)	17.245	17.193	5.23965	6.36369	1.12404	1	0.29777	1.89492	0.334706
00000002_4.tif	predator	CB1112	cat2(e1112)	17.38	17.026	5.23965	6.23454	0.994891	1	0.29777	1.85646	0.296249
00000002_4.tif	predator	CB1112	cat2(e1112)	17.641	8.349	5.23965	3.23843	-2.00122	0	0.29777	0.964306	-0.595904
00000002_4.tif	predator	CB1112	cat2(e1112)	17.849	11.102	5.23965	2.07051	-3.16913	0	0.29777	0.616537	-0.943673
00000002_4.tif	predator	CB1112	cat2(e1112)	17.911	6.526	5.23965	4.95516	-0.284491	0	0.29777	1.4755	-0.084713
00000002_4.tif	predator	CB1112	cat2(e1112)	17.96	9.127	5.23965	2.87336	-2.36629	0	0.29777	0.855599	-0.704611
00000002_4.tif	predator	CB1112	cat2(e1112)	18.043	8.363	5.23965	3.47425	-1.7654	0	0.29777	1.03453	-0.525683
00000002_4.tif	predator	CB1112	cat2(e1112)	18.37	9.078	5.23965	3.22444	-2.01521	0	0.29777	0.960141	-0.600069
00000002_4.tif	predator	CB1112	cat2(e1112)	18.411	6.512	5.23965	5.20183	-0.037817	0	0.29777	1.54895	-0.0112608
00000002_4.tif	predator	CB1112	cat2(e1112)	18.418	13.13	5.23965	3.38979	-1.84986	0	0.29777	1.00938	-0.550832
00000002_4.tif	predator	CB1112	cat2(e1112)	18.536	10.325	5.23965	2.83649	-2.40316	0	0.29777	0.84462	-0.71559
00000002_4.tif	predator	CB1112	cat2(e1112)	18.939	10.512	5.23965	3.19548	-2.04417	0	0.29777	0.951519	-0.608691
00000002_4.tif	predator	CB1112	cat2(e1112)	19.057	16.842	5.23965	6.69785	1.4582	1	0.29777	1.99442	0.434208
00000002_4.tif	predator	CB1112	cat2(e1112)	19.12	5.012	5.23965	6.85602	1.61638	1	0.29777	2.04152	0.481308
00000002_4.tif	predator	CB1112	cat2(e1112)	19.71	10.797	5.23965	3.93424	-1.30541	0	0.29777	1.1715	-0.388711
00000002_4.tif	predator	CB1112	cat2(e1112)	19.835	8.78	5.23965	4.62205	-0.617601	0	0.29777	1.37631	-0.183903
00000002_4.tif	predator	CB1112	cat2(e1112)	19.918	8.745	5.23965	4.71167	-0.527982	0	0.29777	1.40299	-0.157217
00000002_4.tif	predator	CB1112	cat2(e1112)	20.328	15.005	5.23965	6.05931	0.819662	1	0.29777	1.80428	0.244071
00000002_4.tif	predator	CB1112	cat2(e1112)	20.474	5.887	5.23965	6.94025	1.7006	1	0.29777	2.0666	0.506387
00000002_4.tif	predator	CB1112	cat2(e1112)	21.071	8.148	5.23965	6.00983	0.770178	1	0.29777	1.78955	0.229336
00000002_4.tif	predator	CB1112	cat2(e1112)	21.519	14.325	5.23965	6.63176	1.39211	1	0.29777	1.97474	0.41453
00000002_5.tif	control	IV111	CEPrescue	5.526	9.047	4.42693	9.36307	4.93614	1	0.29777	2.78804	1.46983
00000002_5.tif	control	IV111	CEPrescue	5.943	8.724	4.42693	8.96204	4.53511	1	0.29777	2.66863	1.35042
00000002_5.tif	control	IV111	CEPrescue	6.359	15.536	4.42693	10.5496	6.12267	1	0.29777	3.14135	1.82315
00000002_5.tif	control	IV111	CEPrescue	6.557	15.286	4.42693	10.2427	5.81577	1	0.29777	3.04997	1.73176
00000002_5.tif	control	IV111	CEPrescue	7.109	9.651	4.42693	7.78291	3.35599	1	0.29777	2.31752	0.999312
00000002_5.tif	control	IV111	CEPrescue	7.182	9.766	4.42693	7.71573	3.2888	1	0.29777	2.29751	0.979306
00000002_5.tif	control	IV111	CEPrescue	7.641	8.995	4.42693	7.25142	2.82449	1	0.29777	2.15926	0.841049
00000002_5.tif	control	IV111	CEPrescue	7.974	16.63	4.42693	10.0575	5.63061	1	0.29777	2.99483	1.67663
00000002_5.tif	control	IV111	CEPrescue	8.214	13.516	4.42693	7.87931	3.45238	1	0.29777	2.34622	1.02801
00000002_5.tif	control	IV111	CEPrescue	8.422	11.255	4.42693	6.74559	2.31866	1	0.29777	2.00863	0.690428
00000002_5.tif	control	IV111	CEPrescue	8.516	16.536	4.42693	9.62245	5.19552	1	0.29777	2.86528	1.54707
00000002_5.tif	control	IV111	CEPrescue	8.536	9.12	4.42693	6.35224	1.92532	1	0.29777	1.89151	0.573301
00000002_5.tif	control	IV111	CEPrescue	8.568	9.036	4.42693	6.32352	1.89659	1	0.29777	1.88295	0.564747
00000002_5.tif	control	IV111	CEPrescue	8.641	15.443	4.42693	8.74311	4.31618	1	0.29777	2.60344	1.28523
00000002_5.tif	control	IV111	CEPrescue	8.703	16.682	4.42693	9.61104	5.18411	1	0.29777	2.86188	1.54367
00000002_5.tif	control	IV111	CEPrescue	8.766	11.349	4.42693	6.44568	2.01875	1	0.29777	1.91933	0.601124
00000002_5.tif	control	IV111	CEPrescue	8.87	6.484	4.42693	6.65133	2.2244	1	0.29777	1.98057	0.662359
00000002_5.tif	control	IV111	CEPrescue	8.943	9.474	4.42693	5.94392	1.51699	1	0.29777	1.76992	0.451714
00000002_5.tif	control	IV111	CEPrescue	8.984	9.328	4.42693	5.901	1.47407	1	0.29777	1.75714	0.438935
00000002_5.tif	control	IV111	CEPrescue	9.016	6.557	4.42693	6.48814	2.06121	1	0.29777	1.93197	0.613766
00000002_5.tif	control	IV111	CEPrescue	9.13	15.411	4.42693	8.37758	3.95065	1	0.29777	2.49459	1.17638
00000002_5.tif	control	IV111	CEPrescue	9.13	9.859	4.42693	5.77991	1.35298	1	0.29777	1.72108	0.402876
00000002_5.tif	control	IV111	CEPrescue	9.266	9.557	4.42693	5.62387	1.19694	1	0.29777	1.67462	0.356413
00000002_5.tif	control	IV111	CEPrescue	9.401	18.641	4.42693	10.812	6.38507	1	0.29777	3.21949	1.90128
00000002_5.tif	control	IV111	CEPrescue	9.776	15.036	4.42693	7.66422	3.23729	1	0.29777	2.28217	0.963968
00000002_5.tif	control	IV111	CEPrescue	9.818	9.714	4.42693	5.08206	0.655134	1	0.29777	1.51329	0.195079
00000002_5.tif	control	IV111	CEPrescue	9.88	17.224	4.42693	9.35285	4.92592	1	0.29777	2.785	1.46679
00000002_5.tif	control	IV111	CEPrescue	10.016	9.307	4.42693	4.86903	0.442097	1	0.29777	1.44985	0.131643
00000002_5.tif	control	IV111	CEPrescue	10.016	5.88	4.42693	5.96334	1.53641	1	0.29777	1.7757	0.457497
00000002_5.tif	control	IV111	CEPrescue	10.047	14.755	4.42693	7.27412	2.84719	1	0.29777	2.16602	0.847809
00000002_5.tif	control	IV111	CEPrescue	10.161	6.005	4.42693	5.77281	1.34588	1	0.29777	1.71897	0.400762
00000002_5.tif	control	IV111	CEPrescue	10.224	12.109	4.42693	5.43017	1.00324	1	0.29777	1.61694	0.298734
00000002_5.tif	control	IV111	CEPrescue	10.328	12.328	4.42693	5.4586	1.03167	1	0.29777	1.62541	0.307199
00000002_5.tif	control	IV111	CEPrescue	10.365	20.135	4.42693	11.7188	7.29185	1	0.29777	3.4895	2.17129
00000002_5.tif	control	IV111	CEPrescue	10.533	11.54	4.42693	4.88416	0.457228	1	0.29777	1.45436	0.136149
00000002_5.tif	control	IV111	CEPrescue	10.599	4.911	4.42693	6.15106	1.72413	1	0.29777	1.8316	0.513394
00000002_5.tif	control	IV111	CEPrescue	10.599	7.349	4.42693	4.71874	0.291807	1	0.29777	1.4051	0.0868914
00000002_5.tif	control	IV111	CEPrescue	10.616	11.609	4.42693	4.84254	0.415607	1	0.29777	1.44196	0.123755
00000002_5.tif	control	IV111	CEPrescue	10.682	20.505	4.42693	11.9458	7.51888	1	0.29777	3.5571	2.2389
00000002_5.tif	control	IV111	CEPrescue	10.724	4.786	4.42693	6.15616	1.72923	1	0.29777	1.83312	0.514913
00000002_5.tif	control	IV111	CEPrescue	10.786	7.172	4.42693	4.6291	0.202174	1	0.29777	1.37841	0.0602015
00000002_5.tif	control	IV111	CEPrescue	10.88	20.589	4.42693	11.9567	7.52978	1	0.29777	3.56035	2.24214
00000002_5.tif	control	IV111	CEPrescue	10.964	18.266	4.42693	9.76481	5.33788	1	0.29777	2.90767	1.58946
00000002_5.tif	control	IV111	CEPrescue	10.995	18.12	4.42693	9.6187	5.19177	1	0.29777	2.86416	1.54595
00000002_5.tif	control	IV111	CEPrescue	11.026	17.568	4.42693	9.1034	4.67647	1	0.29777	2.71072	1.39251
00000002_5.tif	control	IV111	CEPrescue	11.068	5.755	4.42693	5.22495	0.798022	1	0.29777	1.55583	0.237627
00000002_5.tif	control	IV111	CEPrescue	11.151	4.807	4.42693	5.85978	1.43285	1	0.29777	1.74487	0.42666
00000002_5.tif	control	IV111	CEPrescue	11.161	14.38	4.42693	6.28024	1.85331	1	0.29777	1.87007	0.551861
00000002_5.tif	control	IV111	CEPrescue	11.255	17.391	4.42693	8.84701	4.42008	1	0.29777	2.63437	1.31617
00000002_5.tif	control	IV111	CEPrescue	11.255	7.578	4.42693	4.02765	-0.399284	0	0.29777	1.19931	-0.118895
00000002_5.tif	control	IV111	CEPrescue	11.297	14.37	4.42693	6.19241	1.76548	1	0.29777	1.84391	0.525707
00000002_5.tif	control	IV111	CEPrescue	11.391	17.568	4.42693	8.95478	4.52785	1	0.29777	2.66646	1.34826
00000002_5.tif	control	IV111	CEPrescue	11.724	5.099	4.42693	5.2758	0.848874	1	0.29777	1.57098	0.252769
00000002_5.tif	control	IV111	CEPrescue	11.839	5.151	4.42693	5.16563	0.738697	1	0.29777	1.53817	0.219962
00000002_5.tif	control	IV111	CEPrescue	11.866	10.286	4.42693	3.16887	-1.25806	0	0.29777	0.943594	-0.374613
00000002_5.tif	control	IV111	CEPrescue	11.87	4.984	4.42693	5.28367	0.856739	1	0.29777	1.57332	0.255111
00000002_5.tif	control	IV111	CEPrescue	11.901	5.599	4.42693	4.77205	0.345118	1	0.29777	1.42097	0.102766
00000002_5.tif	control	IV111	CEPrescue	11.984	10.238	4.42693	3.04188	-1.38505	0	0.29777	0.90578	-0.412427
00000002_5.tif	control	IV111	CEPrescue	12.057	6.193	4.42693	4.21835	-0.208578	0	0.29777	1.2561	-0.0621084
00000002_5.tif	control	IV111	CEPrescue	12.102	8.231	4.42693	2.98957	-1.43736	0	0.29777	0.890205	-0.428001
00000002_5.tif	control	IV111	CEPrescue	12.161	19.755	4.42693	10.7818	6.35485	1	0.29777	3.21049	1.89228
00000002_5.tif	control	IV111	CEPrescue	12.172	19.87	4.42693	10.8903	6.46341	1	0.29777	3.24282	1.92461
00000002_5.tif	control	IV111	CEPrescue	12.394	9.12	4.42693	2.49926	-1.92767	0	0.29777	0.744204	-0.574003
00000002_5.tif	control	IV111	CEPrescue	12.547	2.099	4.42693	7.59292	3.16599	1	0.29777	2.26094	0.942737
00000002_5.tif	control	IV111	CEPrescue	12.641	17.62	4.42693	8.5951	4.16817	1	0.29777	2.55936	1.24116
00000002_5.tif	control	IV111	CEPrescue	12.766	19.87	4.42693	10.7578	6.33083	1	0.29777	3.20334	1.88513
00000002_5.tif	control	IV111	CEPrescue	12.797	5.453	4.42693	4.39735	-0.0295842	0	0.29777	1.3094	-0.00880929
00000002_5.tif	control	IV111	CEPrescue	12.818	19.859	4.42693	10.7368	6.30991	1	0.29777	3.19711	1.8789
00000002_5.tif	control	IV111	CEPrescue	12.828	16.411	4.42693	7.38045	2.95352	1	0.29777	2.19768	0.879469
00000002_5.tif	control	IV111	CEPrescue	12.936	11.616	4.42693	3.00939	-1.41754	0	0.29777	0.896107	-0.4221
00000002_5.tif	control	IV111	CEPrescue	12.974	5.266	4.42693	4.48455	0.0576186	1	0.29777	1.33536	0.0171571
00000002_5.tif	control	IV111	CEPrescue	12.984	5.891	4.42693	3.92332	-0.503611	0	0.29777	1.16825	-0.14996
00000002_5.tif	control	IV111	CEPrescue	13.036	6.036	4.42693	3.77136	-0.655567	0	0.29777	1.123	-0.195208
00000002_5.tif	control	IV111	CEPrescue	13.099	5.964	4.42693	3.8043	-0.622632	0	0.29777	1.13281	-0.185401
00000002_5.tif	control	IV111	CEPrescue	13.137	8.016	4.42693	2.1826	-2.24433	0	0.29777	0.649914	-0.668293
00000002_5.tif	control	IV111	CEPrescue	13.151	6.078	4.42693	3.67924	-0.747693	0	0.29777	1.09557	-0.22264
00000002_5.tif	control	IV111	CEPrescue	13.2	8.439	4.42693	1.90281	-2.52412	0	0.29777	0.566599	-0.751607
00000002_5.tif	control	IV111	CEPrescue	13.227	8.321	4.42693	1.93726	-2.48967	0	0.29777	0.576857	-0.741349
00000002_5.tif	control	IV111	CEPrescue	13.297	6.807	4.42693	2.97523	-1.4517	0	0.29777	0.885935	-0.432272
00000002_5.tif	control	IV111	CEPrescue	13.307	16.37	4.42693	7.22152	2.79459	1	0.29777	2.15035	0.832144
00000002_5.tif	control	IV111	CEPrescue	13.328	3.005	4.42693	6.50702	2.0801	1	0.29777	1.9376	0.61939
00000002_5.tif	control	IV111	CEPrescue	13.491	7.439	4.42693	2.34365	-2.08328	0	0.29777	0.697868	-0.620338
00000002_5.tif	control	IV111	CEPrescue	13.505	16.401	4.42693	7.21127	2.78435	1	0.29777	2.1473	0.829095
00000002_5.tif	control	IV111	CEPrescue	13.547	15.984	4.42693	6.79405	2.36712	1	0.29777	2.02307	0.704859
00000002_5.tif	control	IV111	CEPrescue	13.609	5.495	4.42693	4.03507	-0.391863	0	0.29777	1.20152	-0.116685
00000002_5.tif	control	IV111	CEPrescue	13.651	15.078	4.42693	5.88581	1.45888	1	0.29777	1.75262	0.434411
00000002_5.tif	control	IV111	CEPrescue	13.661	5.401	4.42693	4.10856	-0.31837	0	0.29777	1.22341	-0.094801
00000002_5.tif	control	IV111	CEPrescue	13.686	8.856	4.42693	1.28674	-3.14019	0	0.29777	0.383151	-0.935055
00000002_5.tif	control	IV111	CEPrescue	13.866	8.78	4.42693	1.15465	-3.27228	0	0.29777	0.343819	-0.974387
00000002_5.tif	control	IV111	CEPrescue	14.12	16.88	4.42693	7.59562	3.16869	1	0.29777	2.26175	0.943542
00000002_5.tif	control	IV111	CEPrescue	14.172	11.818	4.42693	2.59488	-1.83205	0	0.29777	0.772677	-0.54553
00000002_5.tif	control	IV111	CEPrescue	14.464	2.38	4.42693	6.95575	2.52882	1	0.29777	2.07121	0.753008
00000002_5.tif	control	IV111	CEPrescue	14.561	12.075	4.42693	2.77101	-1.65592	0	0.29777	0.825123	-0.493084
00000002_5.tif	control	IV111	CEPrescue	14.88	17.464	4.42693	8.141	3.71407	1	0.29777	2.42415	1.10594
00000002_5.tif	control	IV111	CEPrescue	14.929	8.259	4.42693	1.06491	-3.36202	0	0.29777	0.317098	-1.00111
00000002_5.tif	control	IV111	CEPrescue	15.047	17.443	4.42693	8.12162	3.69469	1	0.29777	2.41837	1.10017
00000002_5.tif	control	IV111	CEPrescue	15.116	7.703	4.42693	1.63639	-2.79054	0	0.29777	0.487267	-0.83094
00000002_5.tif	control	IV111	CEPrescue	15.144	9.148	4.42693	0.31258	-4.11435	0	0.29777	0.0930768	-1.22513
00000002_5.tif	control	IV111	CEPrescue	15.172	9.62	4.42693	0.413011	-4.01392	0	0.29777	0.122982	-1.19522
00000002_5.tif	control	IV111	CEPrescue	15.307	3.766	4.42693	5.573	1.14607	1	0.29777	1.65947	0.341266
00000002_5.tif	control	IV111	CEPrescue	15.349	3.682	4.42693	5.66005	1.23312	1	0.29777	1.68539	0.367187
00000002_5.tif	control	IV111	CEPrescue	15.394	11.727	4.42693	2.45729	-1.96963	0	0.29777	0.731709	-0.586498
00000002_5.tif	control	IV111	CEPrescue	15.484	1.849	4.42693	7.49796	3.07104	1	0.29777	2.23267	0.914462
00000002_5.tif	control	IV111	CEPrescue	15.568	3.807	4.42693	5.55812	1.13119	1	0.29777	1.65504	0.336836
00000002_5.tif	control	IV111	CEPrescue	15.637	16.571	4.42693	7.28691	2.85998	1	0.29777	2.16982	0.851615
00000002_5.tif	control	IV111	CEPrescue	15.929	7.585	4.42693	2.02746	-2.39947	0	0.29777	0.603716	-0.714491
00000002_5.tif	control	IV111	CEPrescue	16.089	2.443	4.42693	6.98456	2.55763	1	0.29777	2.07979	0.761584
00000002_5.tif	control	IV111	CEPrescue	16.47	5.707	4.42693	3.94812	-0.478806	0	0.29777	1.17563	-0.142574
00000002_5.tif	control	IV111	CEPrescue	16.526	3.248	4.42693	6.29273	1.86581	1	0.29777	1.87379	0.555581
00000002_5.tif	control	IV111	CEPrescue	16.554	3.339	4.42693	6.21239	1.78546	1	0.29777	1.84986	0.531657
00000002_5.tif	control	IV111	CEPrescue	16.672	2.769	4.42693	6.79325	2.36632	1	0.29777	2.02283	0.70462
00000002_5.tif	control	IV111	CEPrescue	16.714	13.769	4.42693	4.80751	0.380581	1	0.29777	1.43153	0.113326
00000002_5.tif	control	IV111	CEPrescue	16.894	8.998	4.42693	2.03512	-2.39181	0	0.29777	0.605997	-0.71221
00000002_5.tif	control	IV111	CEPrescue	16.957	11.731	4.42693	3.17674	-1.25019	0	0.29777	0.945937	-0.37227
00000002_5.tif	control	IV111	CEPrescue	17.172	12.63	4.42693	4.02077	-0.406156	0	0.29777	1.19727	-0.120941
00000002_5.tif	control	IV111	CEPrescue	17.241	3.241	4.42693	6.52238	2.09545	1	0.29777	1.94217	0.623963
00000002_5.tif	control	IV111	CEPrescue	17.457	3.359	4.42693	6.49496	2.06803	1	0.29777	1.934	0.615797
00000002_5.tif	control	IV111	CEPrescue	17.769	13.262	4.42693	4.88192	0.454994	1	0.29777	1.45369	0.135484
00000002_5.tif	control	IV111	CEPrescue	17.818	13.123	4.42693	4.80026	0.37333	1	0.29777	1.42937	0.111166
00000002_5.tif	control	IV111	CEPrescue	17.825	4.335	4.42693	5.78997	1.36304	1	0.29777	1.72408	0.405872
00000002_5.tif	control	IV111	CEPrescue	17.845	3.498	4.42693	6.53393	2.107	1	0.29777	1.94561	0.627401
00000002_5.tif	control	IV111	CEPrescue	17.873	13.401	4.42693	5.05551	0.628585	1	0.29777	1.50538	0.187174
00000002_5.tif	control	IV111	CEPrescue	17.88	13.262	4.42693	4.94831	0.521378	1	0.29777	1.47346	0.155251
00000002_5.tif	control	IV111	CEPrescue	17.957	13.179	4.42693	4.9301	0.503174	1	0.29777	1.46804	0.14983
00000002_5.tif	control	IV111	CEPrescue	18.755	13.62	4.42693	5.78283	1.3559	1	0.29777	1.72195	0.403746
00000002_5.tif	control	IV111	CEPrescue	18.943	3.717	4.42693	6.92059	2.49366	1	0.29777	2.06074	0.742538
00000002_5.tif	control	IV111	CEPrescue	18.991	4.995	4.42693	5.9658	1.53887	1	0.29777	1.77644	0.458231
00000002_5.tif	control	IV111	CEPrescue	19.04	3.682	4.42693	7.00606	2.57913	1	0.29777	2.0862	0.767988
00000002_5.tif	control	IV111	CEPrescue	19.151	4.988	4.42693	6.08202	1.65509	1	0.29777	1.81104	0.492837
00000002_5.tif	control	IV111	CEPrescue	19.387	5.557	4.42693	5.86948	1.44255	1	0.29777	1.74775	0.429547
00000002_5.tif	control	IV111	CEPrescue	19.429	2.877	4.42693	7.88662	3.4597	1	0.29777	2.3484	1.03019
00000002_5.tif	control	IV111	CEPrescue	19.533	14.043	4.42693	6.62437	2.19744	1	0.29777	1.97254	0.654333
00000002_5.tif	control	IV111	CEPrescue	19.602	14.043	4.42693	6.67297	2.24604	1	0.29777	1.98701	0.668803
00000002_5.tif	control	IV111	CEPrescue	19.964	12.786	4.42693	6.14724	1.72031	1	0.29777	1.83046	0.512258
00000002_5.tif	control	IV111	CEPrescue	20.422	8.953	4.42693	5.54935	1.12242	1	0.29777	1.65243	0.334223
00000002_5.tif	control	IV111	CEPrescue	20.422	12.71	4.42693	6.49077	2.06384	1	0.29777	1.93276	0.614551
00000002_5.tif	control	IV111	CEPrescue	20.533	8.995	4.42693	5.65752	1.23059	1	0.29777	1.68464	0.366432
00000002_5.tif	control	IV111	CEPrescue	21.012	18.46	4.42693	11.0011	6.5742	1	0.29777	3.27581	1.9576
00000002_5.tif	control	IV111	CEPrescue	21.505	10.464	4.42693	6.71761	2.29068	1	0.29777	2.0003	0.682096
00000002_5.tif	control	IV111	CEPrescue	22.484	7.21	4.42693	7.8873	3.46038	1	0.29777	2.3486	1.0304
00000002_5.tif	control	IV111	CEPrescue	22.651	11.13	4.42693	7.97346	3.54653	1	0.29777	2.37426	1.05605
00000002_5.tif	control	IV111	CEPrescue	22.769	11.276	4.42693	8.12229	3.69537	1	0.29777	2.41858	1.10037
00000002_5.tif	control	IV111	CEPrescue	23.04	15.016	4.42693	9.94557	5.51864	1	0.29777	2.96149	1.64328
00000002_5.tif	control	IV111	CEPrescue	23.068	11.116	4.42693	8.37713	3.9502	1	0.29777	2.49446	1.17625
00000003_1.tif	control	CB1112	cat2(e1112)	9.845	10.04	5.04705	3.65296	-1.3941	0	0.29777	1.08774	-0.415121
00000003_1.tif	control	CB1112	cat2(e1112)	10.748	12.748	5.04705	3.63222	-1.41483	0	0.29777	1.08157	-0.421295
00000003_1.tif	control	CB1112	cat2(e1112)	10.852	9.387	5.04705	2.80575	-2.24131	0	0.29777	0.835467	-0.667394
00000003_1.tif	control	CB1112	cat2(e1112)	11.026	10.554	5.04705	2.46572	-2.58133	0	0.29777	0.734218	-0.768643
00000003_1.tif	control	CB1112	cat2(e1112)	11.595	12.686	5.04705	2.99721	-2.04985	0	0.29777	0.892478	-0.610383
00000003_1.tif	control	CB1112	cat2(e1112)	11.964	7.512	5.04705	3.22735	-1.8197	0	0.29777	0.961009	-0.541852
00000003_1.tif	control	CB1112	cat2(e1112)	12.469	6.99	5.04705	3.51858	-1.52848	0	0.29777	1.04773	-0.455134
00000003_1.tif	control	CB1112	cat2(e1112)	13.842	9.554	5.04705	0.881016	-4.16604	0	0.29777	0.26234	-1.24052
00000003_1.tif	control	CB1112	cat2(e1112)	13.988	7.137	5.04705	3.26118	-1.78587	0	0.29777	0.971082	-0.531779
00000003_1.tif	control	CB1112	cat2(e1112)	13.988	6.873	5.04705	3.52225	-1.52481	0	0.29777	1.04882	-0.454042
00000003_1.tif	control	CB1112	cat2(e1112)	14.002	11.422	5.04705	1.18249	-3.86456	0	0.29777	0.352111	-1.15075
00000003_1.tif	control	CB1112	cat2(e1112)	14.536	13.623	5.04705	3.42934	-1.61771	0	0.29777	1.02116	-0.481705
00000003_1.tif	control	CB1112	cat2(e1112)	14.557	8.227	5.04705	2.38679	-2.66027	0	0.29777	0.710714	-0.792147
00000003_1.tif	control	CB1112	cat2(e1112)	15.495	13.95	5.04705	4.11575	-0.931303	0	0.29777	1.22555	-0.277314
00000003_1.tif	control	CB1112	cat2(e1112)	15.502	13.852	5.04705	4.03403	-1.01303	0	0.29777	1.20121	-0.301649
00000003_1.tif	control	CB1112	cat2(e1112)	15.627	13.929	5.04705	4.16381	-0.883239	0	0.29777	1.23986	-0.263002
00000003_1.tif	control	CB1112	cat2(e1112)	15.887	13.748	5.04705	4.15448	-0.89257	0	0.29777	1.23708	-0.265781
00000003_1.tif	control	CB1112	cat2(e1112)	16.873	10.196	5.04705	3.39292	-1.65414	0	0.29777	1.01031	-0.492552
00000003_1.tif	control	CB1112	cat2(e1112)	17.075	10.134	5.04705	3.59804	-1.44901	0	0.29777	1.07139	-0.431472
00000003_2.tif	control	CB1112	cat2(e1112)	11.012	11.807	4.58339	3.67603	-0.907359	0	0.29777	1.09461	-0.270184
00000003_2.tif	control	CB1112	cat2(e1112)	11.464	10.87	4.58339	3.3619	-1.22149	0	0.29777	1.00107	-0.363724
00000003_2.tif	control	CB1112	cat2(e1112)	11.832	11.509	4.58339	2.87321	-1.71018	0	0.29777	0.855556	-0.509242
00000003_2.tif	control	CB1112	cat2(e1112)	12.116	12.891	4.58339	2.78493	-1.79847	0	0.29777	0.829267	-0.53553
00000003_2.tif	control	CB1112	cat2(e1112)	12.255	13.203	4.58339	2.79712	-1.78627	0	0.29777	0.832899	-0.531898
00000003_2.tif	control	CB1112	cat2(e1112)	12.47	11.668	4.58339	2.22341	-2.35998	0	0.29777	0.662065	-0.702733
00000003_2.tif	control	CB1112	cat2(e1112)	12.49	13.354	4.58339	2.67865	-1.90474	0	0.29777	0.797622	-0.567176
00000003_2.tif	control	CB1112	cat2(e1112)	12.644	11.411	4.58339	2.08511	-2.49828	0	0.29777	0.620883	-0.743914
00000003_2.tif	control	CB1112	cat2(e1112)	12.686	13.071	4.58339	2.35913	-2.22426	0	0.29777	0.702479	-0.662318
00000003_2.tif	control	CB1112	cat2(e1112)	12.7	4.224	4.58339	7.85474	3.27135	1	0.29777	2.33891	0.974109
00000003_2.tif	control	CB1112	cat2(e1112)	12.734	11.411	4.58339	1.99696	-2.58643	0	0.29777	0.594636	-0.770162
00000003_2.tif	control	CB1112	cat2(e1112)	12.88	12.085	4.58339	1.82688	-2.75651	0	0.29777	0.543991	-0.820806
00000003_2.tif	control	CB1112	cat2(e1112)	13.026	11.918	4.58339	1.66471	-2.91868	0	0.29777	0.495702	-0.869096
00000003_2.tif	control	CB1112	cat2(e1112)	13.109	13.557	4.58339	2.34521	-2.23819	0	0.29777	0.698332	-0.666465
00000003_2.tif	control	CB1112	cat2(e1112)	13.283	12.974	4.58339	1.81627	-2.76713	0	0.29777	0.54083	-0.823967
00000003_2.tif	control	CB1112	cat2(e1112)	13.394	10.092	4.58339	2.1612	-2.42219	0	0.29777	0.643541	-0.721256
00000003_2.tif	control	CB1112	cat2(e1112)	13.543	14.665	4.58339	3.06398	-1.51941	0	0.29777	0.912362	-0.452435
00000003_2.tif	control	CB1112	cat2(e1112)	13.585	12.766	4.58339	1.45116	-3.13224	0	0.29777	0.432111	-0.932686
00000003_2.tif	control	CB1112	cat2(e1112)	13.641	14.401	4.58339	2.7825	-1.8009	0	0.29777	0.828544	-0.536253
00000003_2.tif	control	CB1112	cat2(e1112)	13.661	14.505	4.58339	2.87191	-1.71149	0	0.29777	0.855168	-0.509629
00000003_2.tif	control	CB1112	cat2(e1112)	13.675	12.849	4.58339	1.44182	-3.14157	0	0.29777	0.429331	-0.935466
00000003_2.tif	control	CB1112	cat2(e1112)	13.717	12.363	4.58339	1.11105	-3.47234	0	0.29777	0.330839	-1.03396
00000003_2.tif	control	CB1112	cat2(e1112)	13.766	13.866	4.58339	2.24141	-2.34198	0	0.29777	0.667426	-0.697372
00000003_2.tif	control	CB1112	cat2(e1112)	13.78	14.186	4.58339	2.53145	-2.05194	0	0.29777	0.75379	-0.611008
00000003_2.tif	control	CB1112	cat2(e1112)	13.8	11.717	4.58339	0.894304	-3.68909	0	0.29777	0.266297	-1.0985
00000003_2.tif	control	CB1112	cat2(e1112)	13.807	13.832	4.58339	2.19368	-2.38971	0	0.29777	0.653213	-0.711584
00000003_2.tif	control	CB1112	cat2(e1112)	13.995	14.582	4.58339	2.8447	-1.73869	0	0.29777	0.847067	-0.51773
00000003_2.tif	control	CB1112	cat2(e1112)	14.03	14.491	4.58339	2.74794	-1.83545	0	0.29777	0.818255	-0.546542
00000003_2.tif	control	CB1112	cat2(e1112)	14.05	14.033	4.58339	2.30025	-2.28314	0	0.29777	0.684945	-0.679852
00000003_2.tif	control	CB1112	cat2(e1112)	14.071	14.082	4.58339	2.34175	-2.24165	0	0.29777	0.697301	-0.667496
00000003_2.tif	control	CB1112	cat2(e1112)	14.106	8.995	4.58339	2.88727	-1.69613	0	0.29777	0.859741	-0.505056
00000003_2.tif	control	CB1112	cat2(e1112)	14.266	13.845	4.58339	2.06557	-2.51783	0	0.29777	0.615064	-0.749733
00000003_2.tif	control	CB1112	cat2(e1112)	14.474	9.731	4.58339	2.10292	-2.48048	0	0.29777	0.626186	-0.738612
00000003_2.tif	control	CB1112	cat2(e1112)	14.571	13.762	4.58339	1.94253	-2.64087	0	0.29777	0.578426	-0.786371
00000003_2.tif	control	CB1112	cat2(e1112)	14.745	10.53	4.58339	1.29426	-3.28914	0	0.29777	0.385391	-0.979407
00000003_2.tif	control	CB1112	cat2(e1112)	14.807	10.439	4.58339	1.38911	-3.19429	0	0.29777	0.413634	-0.951163
00000003_2.tif	control	CB1112	cat2(e1112)	14.911	10.661	4.58339	1.1832	-3.40019	0	0.29777	0.352323	-1.01247
00000003_2.tif	control	CB1112	cat2(e1112)	15.141	9.28	4.58339	2.58303	-2.00036	0	0.29777	0.76915	-0.595647
00000003_2.tif	control	CB1112	cat2(e1112)	15.391	9.425	4.58339	2.49892	-2.08447	0	0.29777	0.744104	-0.620693
00000003_2.tif	control	CB1112	cat2(e1112)	15.405	8.731	4.58339	3.17404	-1.40935	0	0.29777	0.945135	-0.419662
00000003_2.tif	control	CB1112	cat2(e1112)	15.53	9.78	4.58339	2.20971	-2.37368	0	0.29777	0.657985	-0.706812
00000003_2.tif	control	CB1112	cat2(e1112)	15.585	12.266	4.58339	1.00043	-3.58296	0	0.29777	0.297898	-1.0669
00000003_2.tif	control	CB1112	cat2(e1112)	15.606	10.071	4.58339	1.97794	-2.60546	0	0.29777	0.58897	-0.775827
00000003_2.tif	control	CB1112	cat2(e1112)	15.62	9.974	4.58339	2.07061	-2.51278	0	0.29777	0.616565	-0.748232
00000003_2.tif	control	CB1112	cat2(e1112)	15.655	9.543	4.58339	2.47659	-2.10681	0	0.29777	0.737454	-0.627343
00000003_2.tif	control	CB1112	cat2(e1112)	15.731	8.453	4.58339	3.52771	-1.05568	0	0.29777	1.05045	-0.31435
00000003_2.tif	control	CB1112	cat2(e1112)	15.745	9.37	4.58339	2.67104	-1.91235	0	0.29777	0.795356	-0.569441
00000003_2.tif	control	CB1112	cat2(e1112)	15.821	8.356	4.58339	3.64743	-0.935959	0	0.29777	1.0861	-0.278701
00000003_2.tif	control	CB1112	cat2(e1112)	15.835	9.245	4.58339	2.82165	-1.76175	0	0.29777	0.840202	-0.524595
00000003_2.tif	control	CB1112	cat2(e1112)	15.863	10.273	4.58339	1.94503	-2.63837	0	0.29777	0.57917	-0.785627
00000003_2.tif	control	CB1112	cat2(e1112)	15.981	11.53	4.58339	1.32578	-3.25761	0	0.29777	0.394778	-0.970019
00000003_2.tif	control	CB1112	cat2(e1112)	16.023	9.446	4.58339	2.72623	-1.85716	0	0.29777	0.811791	-0.553006
00000003_2.tif	control	CB1112	cat2(e1112)	16.043	12.661	4.58339	1.59319	-2.9902	0	0.29777	0.474406	-0.890392
00000003_2.tif	control	CB1112	cat2(e1112)	16.085	9.036	4.58339	3.11753	-1.46587	0	0.29777	0.928306	-0.436491
00000003_2.tif	control	CB1112	cat2(e1112)	16.168	9.286	4.58339	2.93714	-1.64626	0	0.29777	0.874591	-0.490206
00000003_2.tif	control	CB1112	cat2(e1112)	16.217	11.46	4.58339	1.5715	-3.01189	0	0.29777	0.467945	-0.896852
00000003_2.tif	control	CB1112	cat2(e1112)	16.224	11.356	4.58339	1.60542	-2.97797	0	0.29777	0.478047	-0.88675
00000003_2.tif	control	CB1112	cat2(e1112)	16.328	10.592	4.58339	2.0506	-2.53279	0	0.29777	0.610607	-0.75419
00000003_2.tif	control	CB1112	cat2(e1112)	16.335	9.335	4.58339	2.98375	-1.59965	0	0.29777	0.888471	-0.476326
00000003_2.tif	control	CB1112	cat2(e1112)	16.363	10.446	4.58339	2.16835	-2.41504	0	0.29777	0.64567	-0.719127
00000003_2.tif	control	CB1112	cat2(e1112)	16.495	9.731	4.58339	2.76436	-1.81903	0	0.29777	0.823145	-0.541652
00000003_2.tif	control	CB1112	cat2(e1112)	16.53	9.877	4.58339	2.67953	-1.90386	0	0.29777	0.797884	-0.566914
00000003_2.tif	control	CB1112	cat2(e1112)	16.661	13.311	4.58339	2.47121	-2.11218	0	0.29777	0.735852	-0.628945
00000003_2.tif	control	CB1112	cat2(e1112)	16.668	13.13	4.58339	2.37248	-2.21092	0	0.29777	0.706453	-0.658345
00000003_2.tif	control	CB1112	cat2(e1112)	16.696	14.88	4.58339	3.6575	-0.925893	0	0.29777	1.08909	-0.275703
00000003_2.tif	control	CB1112	cat2(e1112)	16.759	11.634	4.58339	2.07961	-2.50379	0	0.29777	0.619244	-0.745553
00000003_2.tif	control	CB1112	cat2(e1112)	16.78	9.627	4.58339	3.03297	-1.55043	0	0.29777	0.903126	-0.461671
00000003_2.tif	control	CB1112	cat2(e1112)	16.925	12.137	4.58339	2.25893	-2.32446	0	0.29777	0.672642	-0.692156
00000003_2.tif	control	CB1112	cat2(e1112)	16.925	12.741	4.58339	2.41803	-2.16536	0	0.29777	0.720018	-0.644779
00000003_2.tif	control	CB1112	cat2(e1112)	16.96	10.12	4.58339	2.8394	-1.74399	0	0.29777	0.845488	-0.519309
00000003_2.tif	control	CB1112	cat2(e1112)	17.016	9.724	4.58339	3.13455	-1.44885	0	0.29777	0.933374	-0.431423
00000003_2.tif	control	CB1112	cat2(e1112)	17.03	15.061	4.58339	3.9962	-0.587194	0	0.29777	1.18995	-0.174849
00000003_2.tif	control	CB1112	cat2(e1112)	17.043	9.418	4.58339	3.36601	-1.21738	0	0.29777	1.0023	-0.362499
00000003_2.tif	control	CB1112	cat2(e1112)	17.043	11.502	4.58339	2.37678	-2.20662	0	0.29777	0.707733	-0.657064
00000003_2.tif	control	CB1112	cat2(e1112)	17.224	11.564	4.58339	2.54919	-2.0342	0	0.29777	0.759073	-0.605724
00000003_2.tif	control	CB1112	cat2(e1112)	17.238	11.023	4.58339	2.67255	-1.91085	0	0.29777	0.795804	-0.568993
00000003_2.tif	control	CB1112	cat2(e1112)	17.286	11.203	4.58339	2.67096	-1.91244	0	0.29777	0.79533	-0.569467
00000003_2.tif	control	CB1112	cat2(e1112)	17.439	11.418	4.58339	2.78065	-1.80274	0	0.29777	0.827995	-0.536802
00000003_2.tif	control	CB1112	cat2(e1112)	17.488	12.262	4.58339	2.83421	-1.74919	0	0.29777	0.843941	-0.520856
00000003_2.tif	control	CB1112	cat2(e1112)	17.502	12.172	4.58339	2.83556	-1.74783	0	0.29777	0.844345	-0.520453
00000003_2.tif	control	CB1112	cat2(e1112)	17.696	11.453	4.58339	3.03067	-1.55272	0	0.29777	0.902443	-0.462354
00000003_2.tif	control	CB1112	cat2(e1112)	17.766	11.62	4.58339	3.08469	-1.49871	0	0.29777	0.918527	-0.44627
00000003_2.tif	control	CB1112	cat2(e1112)	17.807	11.328	4.58339	3.15804	-1.42536	0	0.29777	0.940368	-0.424429
00000003_2.tif	control	CB1112	cat2(e1112)	17.828	13.012	4.58339	3.35758	-1.22582	0	0.29777	0.999786	-0.365012
00000003_2.tif	control	CB1112	cat2(e1112)	17.877	11.481	4.58339	3.20729	-1.37611	0	0.29777	0.955034	-0.409764
00000003_2.tif	control	CB1112	cat2(e1112)	18.036	11.592	4.58339	3.35596	-1.22743	0	0.29777	0.999304	-0.365493
00000003_2.tif	control	CB1112	cat2(e1112)	18.127	11.467	4.58339	3.45738	-1.12602	0	0.29777	1.0295	-0.335294
00000003_2.tif	control	CB1112	cat2(e1112)	18.189	10.884	4.58339	3.62474	-0.958656	0	0.29777	1.07934	-0.285459
00000003_2.tif	control	CB1112	cat2(e1112)	18.398	12.623	4.58339	3.79527	-0.78812	0	0.29777	1.13012	-0.234679
00000003_2.tif	control	CB1112	cat2(e1112)	18.557	12.734	4.58339	3.97481	-0.608588	0	0.29777	1.18358	-0.181219
00000003_2.tif	control	CB1112	cat2(e1112)	18.807	12.484	4.58339	4.1717	-0.411694	0	0.29777	1.24221	-0.12259
00000003_5.tif	control	IV111	CEPrescue	4.911	13.016	5.38551	10.1887	4.80319	1	0.29777	3.03389	1.43025
00000003_5.tif	control	IV111	CEPrescue	5.599	13.693	5.38551	9.7652	4.37968	1	0.29777	2.90778	1.30414
00000003_5.tif	control	IV111	CEPrescue	5.693	13.526	5.38551	9.61632	4.23081	1	0.29777	2.86345	1.25981
00000003_5.tif	control	IV111	CEPrescue	5.693	10.87	5.38551	9.00116	3.61565	1	0.29777	2.68028	1.07663
00000003_5.tif	control	IV111	CEPrescue	5.776	11.37	5.38551	8.97875	3.59324	1	0.29777	2.6736	1.06996
00000003_5.tif	control	IV111	CEPrescue	5.786	13.422	5.38551	9.49217	4.10666	1	0.29777	2.82648	1.22284
00000003_5.tif	control	IV111	CEPrescue	5.984	9.953	5.38551	8.67246	3.28694	1	0.29777	2.5824	0.978753
00000003_5.tif	control	IV111	CEPrescue	6.036	8.828	5.38551	8.70507	3.31955	1	0.29777	2.59211	0.988463
00000003_5.tif	control	IV111	CEPrescue	6.068	9.943	5.38551	8.58857	3.20306	1	0.29777	2.55742	0.953774
00000003_5.tif	control	IV111	CEPrescue	6.339	8.328	5.38551	8.49178	3.10626	1	0.29777	2.5286	0.924952
00000003_5.tif	control	IV111	CEPrescue	6.422	11.516	5.38551	8.36489	2.97938	1	0.29777	2.49081	0.88717
00000003_5.tif	control	IV111	CEPrescue	6.672	8.891	5.38551	8.06654	2.68103	1	0.29777	2.40197	0.798329
00000003_5.tif	control	IV111	CEPrescue	6.87	12.089	5.38551	8.05059	2.66508	1	0.29777	2.39722	0.79358
00000003_5.tif	control	IV111	CEPrescue	6.974	16.078	5.38551	9.76967	4.38415	1	0.29777	2.90911	1.30547
00000003_5.tif	control	IV111	CEPrescue	7.052	16.906	5.38551	10.2438	4.85828	1	0.29777	3.05029	1.44665
00000003_5.tif	control	IV111	CEPrescue	7.068	4.63	5.38551	9.32027	3.93476	1	0.29777	2.7753	1.17165
00000003_5.tif	control	IV111	CEPrescue	7.172	10.099	5.38551	7.48422	2.0987	1	0.29777	2.22858	0.624931
00000003_5.tif	control	IV111	CEPrescue	7.224	12.328	5.38551	7.77563	2.39012	1	0.29777	2.31535	0.711705
00000003_5.tif	control	IV111	CEPrescue	7.245	8.755	5.38551	7.52192	2.13641	1	0.29777	2.2398	0.636158
00000003_5.tif	control	IV111	CEPrescue	7.391	10.307	5.38551	7.26983	1.88432	1	0.29777	2.16474	0.561093
00000003_5.tif	control	IV111	CEPrescue	7.443	16.526	5.38551	9.69895	4.31344	1	0.29777	2.88806	1.28441
00000003_5.tif	control	IV111	CEPrescue	7.453	16.786	5.38551	9.86736	4.48184	1	0.29777	2.9382	1.33456
00000003_5.tif	control	IV111	CEPrescue	7.547	16.443	5.38551	9.56612	4.18061	1	0.29777	2.8485	1.24486
00000003_5.tif	control	IV111	CEPrescue	7.62	16.672	5.38551	9.66758	4.28207	1	0.29777	2.87872	1.27507
00000003_5.tif	control	IV111	CEPrescue	7.641	10.089	5.38551	7.01516	1.62964	1	0.29777	2.0889	0.485259
00000003_5.tif	control	IV111	CEPrescue	7.682	8.307	5.38551	7.18658	1.80106	1	0.29777	2.13995	0.536303
00000003_5.tif	control	IV111	CEPrescue	7.776	13.151	5.38551	7.54985	2.16434	1	0.29777	2.24812	0.644475
00000003_5.tif	control	IV111	CEPrescue	7.859	15.693	5.38551	8.83929	3.45377	1	0.29777	2.63207	1.02843
00000003_5.tif	control	IV111	CEPrescue	7.859	3.349	5.38551	9.53915	4.15364	1	0.29777	2.84047	1.23683
00000003_5.tif	control	IV111	CEPrescue	7.943	15.839	5.38551	8.86959	3.48407	1	0.29777	2.6411	1.03745
00000003_5.tif	control	IV111	CEPrescue	8.047	12.911	5.38551	7.20486	1.81935	1	0.29777	2.14539	0.541747
00000003_5.tif	control	IV111	CEPrescue	8.068	11.245	5.38551	6.69694	1.31142	1	0.29777	1.99415	0.390502
00000003_5.tif	control	IV111	CEPrescue	8.255	8.932	5.38551	6.49653	1.11102	1	0.29777	1.93447	0.330827
00000003_5.tif	control	IV111	CEPrescue	8.401	7.87	5.38551	6.62138	1.23586	1	0.29777	1.97165	0.368002
00000003_5.tif	control	IV111	CEPrescue	8.859	8.474	5.38551	6.00532	0.619803	1	0.29777	1.7882	0.184559
00000003_5.tif	control	IV111	CEPrescue	8.891	8.391	5.38551	5.99675	0.611237	1	0.29777	1.78565	0.182008
00000003_5.tif	control	IV111	CEPrescue	8.891	7.203	5.38551	6.42613	1.04062	1	0.29777	1.91351	0.309864
00000003_5.tif	control	IV111	CEPrescue	8.901	15.922	5.38551	8.22766	2.84215	1	0.29777	2.44995	0.846306
00000003_5.tif	control	IV111	CEPrescue	8.901	14.724	5.38551	7.41897	2.03346	1	0.29777	2.20915	0.605503
00000003_5.tif	control	IV111	CEPrescue	9.005	14.776	5.38551	7.37188	1.98636	1	0.29777	2.19512	0.591479
00000003_5.tif	control	IV111	CEPrescue	9.109	15.922	5.38551	8.08354	2.69803	1	0.29777	2.40704	0.803391
00000003_5.tif	control	IV111	CEPrescue	9.13	3.099	5.38551	8.87366	3.48815	1	0.29777	2.64231	1.03867
00000003_5.tif	control	IV111	CEPrescue	9.224	9.682	5.38551	5.44392	0.0584023	1	0.29777	1.62103	0.0173905
00000003_5.tif	control	IV111	CEPrescue	9.255	13.797	5.38551	6.57806	1.19254	1	0.29777	1.95875	0.355103
00000003_5.tif	control	IV111	CEPrescue	9.411	13.693	5.38551	6.3906	1.00509	1	0.29777	1.90293	0.299286
00000003_5.tif	control	IV111	CEPrescue	9.464	11.911	5.38551	5.51815	0.13264	1	0.29777	1.64314	0.0394963
00000003_5.tif	control	IV111	CEPrescue	9.464	6.693	5.38551	6.1784	0.792889	1	0.29777	1.83974	0.236099
00000003_5.tif	control	IV111	CEPrescue	9.901	6.745	5.38551	5.78621	0.400697	1	0.29777	1.72296	0.119315
00000003_5.tif	control	IV111	CEPrescue	10.026	19.089	5.38551	10.1629	4.77741	1	0.29777	3.02622	1.42257
00000003_5.tif	control	IV111	CEPrescue	10.224	10.057	5.38551	4.43203	-0.953489	0	0.29777	1.31972	-0.28392
00000003_5.tif	control	IV111	CEPrescue	10.443	7.464	5.38551	4.93918	-0.446339	0	0.29777	1.47074	-0.132906
00000003_5.tif	control	IV111	CEPrescue	10.484	16.995	5.38551	8.10862	2.72311	1	0.29777	2.41451	0.810861
00000003_5.tif	control	IV111	CEPrescue	10.609	16.589	5.38551	7.69684	2.31133	1	0.29777	2.29189	0.688245
00000003_5.tif	control	IV111	CEPrescue	10.88	12.734	5.38551	4.63735	-0.748161	0	0.29777	1.38086	-0.22278
00000003_5.tif	control	IV111	CEPrescue	10.901	4.495	5.38551	6.69845	1.31294	1	0.29777	1.9946	0.390953
00000003_5.tif	control	IV111	CEPrescue	11.318	16.786	5.38551	7.52488	2.13936	1	0.29777	2.24068	0.637038
00000003_5.tif	control	IV111	CEPrescue	11.557	5.12	5.38551	5.81635	0.430832	1	0.29777	1.73193	0.128289
00000003_5.tif	control	IV111	CEPrescue	11.557	4.38	5.38551	6.45461	1.0691	1	0.29777	1.92199	0.318346
00000003_5.tif	control	IV111	CEPrescue	11.724	14.599	5.38551	5.41875	0.0332381	1	0.29777	1.61354	0.0098973
00000003_5.tif	control	IV111	CEPrescue	11.734	5.786	5.38551	5.16252	-0.222993	0	0.29777	1.53724	-0.0664007
00000003_5.tif	control	IV111	CEPrescue	12.057	17.797	5.38551	8.17893	2.79341	1	0.29777	2.43544	0.831794
00000003_5.tif	control	IV111	CEPrescue	12.203	4.37	5.38551	6.17971	0.794194	1	0.29777	1.84013	0.236487
00000003_5.tif	control	IV111	CEPrescue	12.443	3.714	5.38551	6.7038	1.31829	1	0.29777	1.99619	0.392546
00000003_5.tif	control	IV111	CEPrescue	12.651	4.13	5.38551	6.24274	0.857223	1	0.29777	1.8589	0.255255
00000003_5.tif	control	IV111	CEPrescue	12.818	15.661	5.38551	5.91197	0.526457	1	0.29777	1.76041	0.156763
00000003_5.tif	control	IV111	CEPrescue	12.828	3.161	5.38551	7.11967	1.73416	1	0.29777	2.12003	0.516381
00000003_5.tif	control	IV111	CEPrescue	12.828	10.307	5.38551	1.84711	-3.53841	0	0.29777	0.550013	-1.05363
00000003_5.tif	control	IV111	CEPrescue	12.839	5.328	5.38551	5.05206	-0.333456	0	0.29777	1.50435	-0.0992933
00000003_5.tif	control	IV111	CEPrescue	12.849	4.859	5.38551	5.48897	0.103451	1	0.29777	1.63445	0.0308047
00000003_5.tif	control	IV111	CEPrescue	12.932	16.005	5.38551	6.20722	0.821703	1	0.29777	1.84832	0.244679
00000003_5.tif	control	IV111	CEPrescue	13.016	16.505	5.38551	6.66783	1.28232	1	0.29777	1.98548	0.381836
00000003_5.tif	control	IV111	CEPrescue	13.109	16.693	5.38551	6.82854	1.44303	1	0.29777	2.03334	0.429691
00000003_5.tif	control	IV111	CEPrescue	13.151	3.922	5.38551	6.30233	0.916821	1	0.29777	1.87665	0.273002
00000003_5.tif	control	IV111	CEPrescue	13.255	9.328	5.38551	1.57245	-3.81306	0	0.29777	0.468228	-1.13542
00000003_5.tif	control	IV111	CEPrescue	13.703	12.505	5.38551	2.64094	-2.74457	0	0.29777	0.786393	-0.817251
00000003_5.tif	control	IV111	CEPrescue	13.932	13.422	5.38551	3.45667	-1.92884	0	0.29777	1.02929	-0.574351
00000003_5.tif	control	IV111	CEPrescue	13.964	16.943	5.38551	6.93561	1.55009	1	0.29777	2.06522	0.461572
00000003_5.tif	control	IV111	CEPrescue	14.047	4.693	5.38551	5.38356	-0.00195729	0	0.29777	1.60306	-0.000582823
00000003_5.tif	control	IV111	CEPrescue	14.182	16.911	5.38551	6.88533	1.49982	1	0.29777	2.05025	0.446602
00000003_5.tif	control	IV111	CEPrescue	14.255	8.557	5.38551	1.53819	-3.84732	0	0.29777	0.458027	-1.14562
00000003_5.tif	control	IV111	CEPrescue	14.286	5.339	5.38551	4.71753	-0.667982	0	0.29777	1.40474	-0.198905
00000003_5.tif	control	IV111	CEPrescue	14.37	6.797	5.38551	3.25758	-2.12793	0	0.29777	0.970009	-0.633635
00000003_5.tif	control	IV111	CEPrescue	14.474	2.62	5.38551	7.42423	2.03872	1	0.29777	2.21071	0.607069
00000003_5.tif	control	IV111	CEPrescue	14.63	4.974	5.38551	5.06807	-0.317447	0	0.29777	1.50912	-0.0945263
00000003_5.tif	control	IV111	CEPrescue	14.714	4.797	5.38551	5.24532	-0.140193	0	0.29777	1.5619	-0.0417453
00000003_5.tif	control	IV111	CEPrescue	14.745	7.411	5.38551	2.6325	-2.75301	0	0.29777	0.783881	-0.819763
00000003_5.tif	control	IV111	CEPrescue	15.12	16.599	5.38551	6.5734	1.18788	1	0.29777	1.95736	0.353716
00000003_5.tif	control	IV111	CEPrescue	15.193	8.12	5.38551	1.99561	-3.38991	0	0.29777	0.594232	-1.00941
00000003_5.tif	control	IV111	CEPrescue	15.214	16.547	5.38551	6.52889	1.14337	1	0.29777	1.94411	0.340463
00000003_5.tif	control	IV111	CEPrescue	15.245	4.88	5.38551	5.19549	-0.190019	0	0.29777	1.54706	-0.056582
00000003_5.tif	control	IV111	CEPrescue	15.359	4.401	5.38551	5.68464	0.299122	1	0.29777	1.69271	0.0890697
00000003_5.tif	control	IV111	CEPrescue	15.443	17.276	5.38551	7.27668	1.89117	1	0.29777	2.16678	0.563134
00000003_5.tif	control	IV111	CEPrescue	15.693	18.734	5.38551	8.75364	3.36813	1	0.29777	2.60657	1.00293
00000003_5.tif	control	IV111	CEPrescue	15.714	18.068	5.38551	8.09543	2.70992	1	0.29777	2.41058	0.806933
00000003_5.tif	control	IV111	CEPrescue	15.724	1.63	5.38551	8.47953	3.09401	1	0.29777	2.52495	0.921304
00000003_5.tif	control	IV111	CEPrescue	15.891	11.422	5.38551	1.85192	-3.53359	0	0.29777	0.551448	-1.0522
00000003_5.tif	control	IV111	CEPrescue	15.911	18.151	5.38551	8.20554	2.82003	1	0.29777	2.44336	0.83972
00000003_5.tif	control	IV111	CEPrescue	15.953	2.672	5.38551	7.48326	2.09774	1	0.29777	2.22829	0.624644
00000003_5.tif	control	IV111	CEPrescue	15.974	2.057	5.38551	8.09304	2.70753	1	0.29777	2.40987	0.806221
00000003_5.tif	control	IV111	CEPrescue	16.141	1.776	5.38551	8.39833	3.01282	1	0.29777	2.50077	0.897127
00000003_5.tif	control	IV111	CEPrescue	16.297	13.224	5.38551	3.58022	-1.80529	0	0.29777	1.06608	-0.537561
00000003_5.tif	control	IV111	CEPrescue	16.38	4.464	5.38551	5.83834	0.45283	1	0.29777	1.73848	0.134839
00000003_5.tif	control	IV111	CEPrescue	16.464	8.036	5.38551	2.70054	-2.68498	0	0.29777	0.804139	-0.799506
00000003_5.tif	control	IV111	CEPrescue	16.495	2.37	5.38551	7.88933	2.50381	1	0.29777	2.34921	0.745561
00000003_5.tif	control	IV111	CEPrescue	16.547	18.974	5.38551	9.12998	3.74446	1	0.29777	2.71863	1.11499
00000003_5.tif	control	IV111	CEPrescue	16.599	3.401	5.38551	6.9194	1.53389	1	0.29777	2.06039	0.456746
00000003_5.tif	control	IV111	CEPrescue	16.661	12.37	5.38551	3.07239	-2.31312	0	0.29777	0.914867	-0.688778
00000003_5.tif	control	IV111	CEPrescue	16.672	3.349	5.38551	6.99003	1.60452	1	0.29777	2.08142	0.477776
00000003_5.tif	control	IV111	CEPrescue	16.786	13.297	5.38551	3.88998	-1.49554	0	0.29777	1.15832	-0.445326
00000003_5.tif	control	IV111	CEPrescue	16.87	2.661	5.38551	7.7059	2.32039	1	0.29777	2.29459	0.690943
00000003_5.tif	control	IV111	CEPrescue	16.932	13.766	5.38551	4.36444	-1.02107	0	0.29777	1.2996	-0.304045
00000003_5.tif	control	IV111	CEPrescue	17.224	10.151	5.38551	2.57031	-2.8152	0	0.29777	0.765362	-0.838283
00000003_5.tif	control	IV111	CEPrescue	17.255	2.557	5.38551	7.92338	2.53787	1	0.29777	2.35935	0.755702
00000003_5.tif	control	IV111	CEPrescue	17.349	13.307	5.38551	4.23231	-1.1532	0	0.29777	1.26026	-0.343389
00000003_5.tif	control	IV111	CEPrescue	17.422	2.641	5.38551	7.90098	2.51547	1	0.29777	2.35268	0.749032
00000003_5.tif	control	IV111	CEPrescue	17.682	5.828	5.38551	5.18792	-0.197598	0	0.29777	1.54481	-0.0588387
00000003_5.tif	control	IV111	CEPrescue	17.693	3.026	5.38551	7.6451	2.25959	1	0.29777	2.27648	0.672838
00000003_5.tif	control	IV111	CEPrescue	17.734	9.234	5.38551	3.18229	-2.20323	0	0.29777	0.947589	-0.656055
00000003_5.tif	control	IV111	CEPrescue	17.776	3.339	5.38551	7.39355	2.00804	1	0.29777	2.20158	0.597933
00000003_5.tif	control	IV111	CEPrescue	17.776	9.13	5.38551	3.25056	-2.13495	0	0.29777	0.967919	-0.635725
00000003_5.tif	control	IV111	CEPrescue	17.807	3.224	5.38551	7.51092	2.12541	1	0.29777	2.23653	0.632882
00000003_5.tif	control	IV111	CEPrescue	18.036	3.599	5.38551	7.27576	1.89024	1	0.29777	2.1665	0.562858
00000003_5.tif	control	IV111	CEPrescue	18.172	12.484	5.38551	4.28084	-1.10467	0	0.29777	1.27471	-0.328938
00000003_5.tif	control	IV111	CEPrescue	18.193	14.568	5.38551	5.74413	0.358617	1	0.29777	1.71043	0.106786
00000003_5.tif	control	IV111	CEPrescue	18.339	7.599	5.38551	4.41959	-0.965928	0	0.29777	1.31602	-0.287624
00000003_5.tif	control	IV111	CEPrescue	18.714	2.474	5.38551	8.58732	3.2018	1	0.29777	2.55704	0.9534
00000003_5.tif	control	IV111	CEPrescue	18.755	5.443	5.38551	6.16057	0.775054	1	0.29777	1.83443	0.230788
00000003_5.tif	control	IV111	CEPrescue	18.776	5.151	5.38551	6.39502	1.00951	1	0.29777	1.90425	0.300601
00000003_5.tif	control	IV111	CEPrescue	18.797	3.099	5.38551	8.08413	2.69861	1	0.29777	2.40721	0.803566
00000003_5.tif	control	IV111	CEPrescue	18.849	5.359	5.38551	6.28584	0.900322	1	0.29777	1.87173	0.268089
00000003_5.tif	control	IV111	CEPrescue	18.922	7.411	5.38551	5.01208	-0.373437	0	0.29777	1.49245	-0.111198
00000003_5.tif	control	IV111	CEPrescue	19.266	11.349	5.38551	4.7917	-0.593818	0	0.29777	1.42682	-0.176821
00000003_5.tif	control	IV111	CEPrescue	19.318	10.453	5.38551	4.68008	-0.705432	0	0.29777	1.39359	-0.210057
00000003_5.tif	control	IV111	CEPrescue	19.339	7.286	5.38551	5.43379	0.0482716	1	0.29777	1.61802	0.0143738
00000003_5.tif	control	IV111	CEPrescue	19.422	7.766	5.38551	5.28157	-0.103949	0	0.29777	1.57269	-0.0309528
00000003_5.tif	control	IV111	CEPrescue	19.464	17.057	5.38551	8.50453	3.11902	1	0.29777	2.53239	0.92875
00000003_5.tif	control	IV111	CEPrescue	19.63	5.339	5.38551	6.84535	1.45984	1	0.29777	2.03834	0.434697
00000003_5.tif	control	IV111	CEPrescue	19.651	6.786	5.38551	5.96251	0.576999	1	0.29777	1.77546	0.171813
00000003_5.tif	control	IV111	CEPrescue	19.651	5.245	5.38551	6.9254	1.53989	1	0.29777	2.06218	0.458533
00000003_5.tif	control	IV111	CEPrescue	19.724	6.401	5.38551	6.24031	0.854799	1	0.29777	1.85818	0.254533
00000003_5.tif	control	IV111	CEPrescue	19.974	5.599	5.38551	6.92975	1.54423	1	0.29777	2.06347	0.459826
00000003_5.tif	control	IV111	CEPrescue	20.203	17.995	5.38551	9.69636	4.31085	1	0.29777	2.88729	1.28364
00000003_5.tif	control	IV111	CEPrescue	20.443	8.443	5.38551	6.00385	0.618332	1	0.29777	1.78777	0.184121
00000003_5.tif	control	IV111	CEPrescue	20.495	7.245	5.38551	6.47434	1.08883	1	0.29777	1.92787	0.324221
00000003_5.tif	control	IV111	CEPrescue	20.495	4.172	5.38551	8.27954	2.89403	1	0.29777	2.4654	0.861755
00000003_5.tif	control	IV111	CEPrescue	20.536	8.589	5.38551	6.05686	0.671351	1	0.29777	1.80355	0.199908
00000003_5.tif	control	IV111	CEPrescue	20.557	7.62	5.38551	6.37871	0.993192	1	0.29777	1.89939	0.295743
00000003_5.tif	control	IV111	CEPrescue	20.557	6.974	5.38551	6.6509	1.26538	1	0.29777	1.98044	0.376793
00000003_5.tif	control	IV111	CEPrescue	20.599	8.286	5.38551	6.197	0.811484	1	0.29777	1.84528	0.241636
00000003_5.tif	control	IV111	CEPrescue	20.609	7.13	5.38551	6.62706	1.24155	1	0.29777	1.97334	0.369696
00000003_5.tif	control	IV111	CEPrescue	20.641	10.12	5.38551	5.98551	0.599994	1	0.29777	1.7823	0.17866
00000003_5.tif	control	IV111	CEPrescue	20.703	11.651	5.38551	6.2574	0.871889	1	0.29777	1.86327	0.259622
00000003_5.tif	control	IV111	CEPrescue	20.755	8.089	5.38551	6.40406	1.01855	1	0.29777	1.90694	0.303293
00000003_5.tif	control	IV111	CEPrescue	20.766	11.734	5.38551	6.33995	0.954436	1	0.29777	1.88785	0.284202
00000003_5.tif	control	IV111	CEPrescue	20.776	17.568	5.38551	9.70026	4.31475	1	0.29777	2.88845	1.2848
00000003_5.tif	control	IV111	CEPrescue	20.828	11.568	5.38551	6.35785	0.972336	1	0.29777	1.89318	0.289533
00000003_5.tif	control	IV111	CEPrescue	20.849	17.453	5.38551	9.65796	4.27244	1	0.29777	2.87585	1.27221
00000003_5.tif	control	IV111	CEPrescue	20.849	12.839	5.38551	6.79533	1.40981	1	0.29777	2.02344	0.4198
00000003_5.tif	control	IV111	CEPrescue	21.432	10.464	5.38551	6.78913	1.40361	1	0.29777	2.0216	0.417954
00000003_5.tif	control	IV111	CEPrescue	21.568	13.391	5.38551	7.6806	2.29508	1	0.29777	2.28705	0.683406
00000003_5.tif	control	IV111	CEPrescue	21.839	9.578	5.38551	7.19797	1.81246	1	0.29777	2.14334	0.539695
00000003_5.tif	control	IV111	CEPrescue	21.932	13.464	5.38551	8.04054	2.65502	1	0.29777	2.39423	0.790587
00000003_5.tif	control	IV111	CEPrescue	22.214	13.13	5.38551	8.1645	2.77899	1	0.29777	2.43114	0.8275
00000003_5.tif	control	IV111	CEPrescue	22.297	16.766	5.38551	10.1783	4.79275	1	0.29777	3.03078	1.42714
00000003_5.tif	control	IV111	CEPrescue	22.401	16.911	5.38551	10.3522	4.96669	1	0.29777	3.08258	1.47893
00000003_5.tif	control	IV111	CEPrescue	22.401	13.234	5.38551	8.37699	2.99147	1	0.29777	2.49442	0.890771
00000003_7.tif	predator	IV111	CEPrescue	4.009	11.057	5.28128	9.20348	3.9222	1	0.29777	2.74052	1.16791
00000003_7.tif	predator	IV111	CEPrescue	4.668	9.911	5.28128	8.69041	3.40913	1	0.29777	2.58774	1.01514
00000003_7.tif	predator	IV111	CEPrescue	4.689	9.502	5.28128	8.7574	3.47613	1	0.29777	2.60769	1.03509
00000003_7.tif	predator	IV111	CEPrescue	4.745	9.752	5.28128	8.64692	3.36564	1	0.29777	2.57479	1.00219
00000003_7.tif	predator	IV111	CEPrescue	4.759	9.627	5.28128	8.66046	3.37919	1	0.29777	2.57883	1.00622
00000003_7.tif	predator	IV111	CEPrescue	4.78	12.196	5.28128	8.44102	3.15974	1	0.29777	2.51348	0.940877
00000003_7.tif	predator	IV111	CEPrescue	4.793	10.307	5.28128	8.49981	3.21853	1	0.29777	2.53099	0.958382
00000003_7.tif	predator	IV111	CEPrescue	4.814	10.078	5.28128	8.51625	3.23497	1	0.29777	2.53588	0.963277
00000003_7.tif	predator	IV111	CEPrescue	4.898	9.523	5.28128	8.54942	3.26814	1	0.29777	2.54576	0.973153
00000003_7.tif	predator	IV111	CEPrescue	4.974	12.023	5.28128	8.2363	2.95502	1	0.29777	2.45252	0.879917
00000003_7.tif	predator	IV111	CEPrescue	4.995	10.293	5.28128	8.30227	3.02099	1	0.29777	2.47217	0.899559
00000003_7.tif	predator	IV111	CEPrescue	5.292	9.021	5.28128	8.30768	3.0264	1	0.29777	2.47378	0.901171
00000003_7.tif	predator	IV111	CEPrescue	5.3	13.832	5.28128	8.21471	2.93343	1	0.29777	2.44609	0.873488
00000003_7.tif	predator	IV111	CEPrescue	5.363	8.911	5.28128	8.27487	2.99359	1	0.29777	2.46401	0.891402
00000003_7.tif	predator	IV111	CEPrescue	5.384	9.009	5.28128	8.22391	2.94263	1	0.29777	2.44883	0.876227
00000003_7.tif	predator	IV111	CEPrescue	5.425	13.929	5.28128	8.12221	2.84093	1	0.29777	2.41855	0.845944
00000003_7.tif	predator	IV111	CEPrescue	5.911	4.724	5.28128	10.0005	4.71918	1	0.29777	2.97784	1.40523
00000003_7.tif	predator	IV111	CEPrescue	6.071	16.484	5.28128	8.65517	3.3739	1	0.29777	2.57725	1.00465
00000003_7.tif	predator	IV111	CEPrescue	6.773	6.37	5.28128	8.26752	2.98624	1	0.29777	2.46182	0.889212
00000003_7.tif	predator	IV111	CEPrescue	6.939	8.266	5.28128	7.07894	1.79766	1	0.29777	2.10789	0.535288
00000003_7.tif	predator	IV111	CEPrescue	6.974	14.637	5.28128	6.93731	1.65603	1	0.29777	2.06572	0.493117
00000003_7.tif	predator	IV111	CEPrescue	7.03	11.543	5.28128	6.16807	0.886794	1	0.29777	1.83667	0.264061
00000003_7.tif	predator	IV111	CEPrescue	7.03	14.672	5.28128	6.90275	1.62148	1	0.29777	2.05543	0.482827
00000003_7.tif	predator	IV111	CEPrescue	7.234	14.974	5.28128	6.86557	1.58429	1	0.29777	2.04436	0.471755
00000003_7.tif	predator	IV111	CEPrescue	7.234	15.661	5.28128	7.23056	1.94928	1	0.29777	2.15304	0.580438
00000003_7.tif	predator	IV111	CEPrescue	7.7	14.106	5.28128	6.05344	0.772158	1	0.29777	1.80253	0.229925
00000003_7.tif	predator	IV111	CEPrescue	7.873	14.856	5.28128	6.25569	0.974416	1	0.29777	1.86276	0.290152
00000003_7.tif	predator	IV111	CEPrescue	7.97	14.682	5.28128	6.08259	0.801308	1	0.29777	1.81121	0.238606
00000003_7.tif	predator	IV111	CEPrescue	8.005	4.439	5.28128	8.8239	3.54262	1	0.29777	2.62749	1.05489
00000003_7.tif	predator	IV111	CEPrescue	8.04	9.8	5.28128	5.45422	0.172939	1	0.29777	1.6241	0.0514961
00000003_7.tif	predator	IV111	CEPrescue	8.547	17.627	5.28128	7.63431	2.35303	1	0.29777	2.27327	0.700663
00000003_7.tif	predator	IV111	CEPrescue	8.644	17.092	5.28128	7.1553	1.87402	1	0.29777	2.13063	0.558026
00000003_7.tif	predator	IV111	CEPrescue	8.741	19.391	5.28128	8.99922	3.71794	1	0.29777	2.6797	1.10709
00000003_7.tif	predator	IV111	CEPrescue	8.811	19.453	5.28128	9.01888	3.7376	1	0.29777	2.68555	1.11295
00000003_7.tif	predator	IV111	CEPrescue	8.839	4.036	5.28128	8.70674	3.42546	1	0.29777	2.5926	1.02
00000003_7.tif	predator	IV111	CEPrescue	9.095	19.009	5.28128	8.49286	3.21158	1	0.29777	2.52892	0.956313
00000003_7.tif	predator	IV111	CEPrescue	9.172	19.064	5.28128	8.50434	3.22306	1	0.29777	2.53234	0.95973
00000003_7.tif	predator	IV111	CEPrescue	9.693	2.474	5.28128	9.75073	4.46946	1	0.29777	2.90348	1.33087
00000003_7.tif	predator	IV111	CEPrescue	9.894	2.509	5.28128	9.64741	4.36613	1	0.29777	2.87271	1.3001
00000003_7.tif	predator	IV111	CEPrescue	10.033	6.891	5.28128	5.6514	0.370124	1	0.29777	1.68282	0.110212
00000003_7.tif	predator	IV111	CEPrescue	10.061	6.703	5.28128	5.7929	0.51162	1	0.29777	1.72495	0.152345
00000003_7.tif	predator	IV111	CEPrescue	10.116	18.224	5.28128	7.33038	2.04911	1	0.29777	2.18277	0.610162
00000003_7.tif	predator	IV111	CEPrescue	10.214	18.106	5.28128	7.18222	1.90095	1	0.29777	2.13865	0.566045
00000003_7.tif	predator	IV111	CEPrescue	10.234	2.655	5.28128	9.39766	4.11638	1	0.29777	2.79834	1.22573
00000003_7.tif	predator	IV111	CEPrescue	10.443	20.446	5.28128	9.29086	4.00959	1	0.29777	2.76654	1.19393
00000003_7.tif	predator	IV111	CEPrescue	10.498	20.467	5.28128	9.2948	4.01352	1	0.29777	2.76771	1.19511
00000003_7.tif	predator	IV111	CEPrescue	11.116	20.37	5.28128	9.04002	3.75874	1	0.29777	2.69185	1.11924
00000003_7.tif	predator	IV111	CEPrescue	11.116	11.12	5.28128	2.13071	-3.15057	0	0.29777	0.634462	-0.938144
00000003_7.tif	predator	IV111	CEPrescue	11.29	20.488	5.28128	9.11689	3.83561	1	0.29777	2.71474	1.14213
00000003_7.tif	predator	IV111	CEPrescue	11.894	14.092	5.28128	2.83651	-2.44477	0	0.29777	0.844627	-0.727979
00000003_7.tif	predator	IV111	CEPrescue	12.047	10.571	5.28128	1.52604	-3.75524	0	0.29777	0.45441	-1.1182
00000003_7.tif	predator	IV111	CEPrescue	12.332	10.439	5.28128	1.42685	-3.85442	0	0.29777	0.424874	-1.14773
00000003_7.tif	predator	IV111	CEPrescue	12.526	10.498	5.28128	1.26776	-4.01352	0	0.29777	0.3775	-1.19511
00000003_7.tif	predator	IV111	CEPrescue	13.151	21.089	5.28128	9.51612	4.23484	1	0.29777	2.83361	1.26101
00000003_7.tif	predator	IV111	CEPrescue	13.193	11.637	5.28128	0.064195	-5.21708	0	0.29777	0.0191153	-1.55349
00000003_7.tif	predator	IV111	CEPrescue	13.484	10.207	5.28128	1.39562	-3.88566	0	0.29777	0.415573	-1.15703
00000003_7.tif	predator	IV111	CEPrescue	13.54	15.064	5.28128	3.50771	-1.77357	0	0.29777	1.04449	-0.528115
00000003_7.tif	predator	IV111	CEPrescue	15.13	11.943	5.28128	1.96711	-3.31417	0	0.29777	0.585747	-0.98686
00000003_7.tif	predator	IV111	CEPrescue	15.186	11.714	5.28128	1.99299	-3.28828	0	0.29777	0.593454	-0.979153
00000003_7.tif	predator	IV111	CEPrescue	15.22	18.082	5.28128	6.81583	1.53455	1	0.29777	2.02955	0.456944
00000003_7.tif	predator	IV111	CEPrescue	15.262	20.804	5.28128	9.45894	4.17766	1	0.29777	2.81659	1.24398
00000003_7.tif	predator	IV111	CEPrescue	15.269	19.359	5.28128	8.05673	2.77545	1	0.29777	2.39905	0.826445
00000003_7.tif	predator	IV111	CEPrescue	15.318	15.259	5.28128	4.25218	-1.0291	0	0.29777	1.26617	-0.306436
00000003_7.tif	predator	IV111	CEPrescue	15.408	20.769	5.28128	9.45783	4.17655	1	0.29777	2.81626	1.24365
00000003_7.tif	predator	IV111	CEPrescue	15.686	19.123	5.28128	7.94938	2.6681	1	0.29777	2.36709	0.794481
00000003_7.tif	predator	IV111	CEPrescue	15.915	9.477	5.28128	3.43152	-1.84976	0	0.29777	1.0218	-0.550804
00000003_7.tif	predator	IV111	CEPrescue	16.075	14.918	5.28128	4.41205	-0.869232	0	0.29777	1.31378	-0.258831
00000003_7.tif	predator	IV111	CEPrescue	16.227	15.523	5.28128	4.97768	-0.303594	0	0.29777	1.48221	-0.0904013
00000003_7.tif	predator	IV111	CEPrescue	17.297	18.425	5.28128	7.98447	2.70319	1	0.29777	2.37753	0.804928
00000003_7.tif	predator	IV111	CEPrescue	17.818	17.3	5.28128	7.35819	2.07691	1	0.29777	2.19105	0.618441
00000003_7.tif	predator	IV111	CEPrescue	17.964	17.405	5.28128	7.53173	2.25045	1	0.29777	2.24272	0.670117
00000003_7.tif	predator	IV111	CEPrescue	18.276	19.974	5.28128	9.81646	4.53518	1	0.29777	2.92305	1.35044
00000003_7.tif	predator	IV111	CEPrescue	18.29	20.217	5.28128	10.0323	4.75103	1	0.29777	2.98732	1.41471
00000003_7.tif	predator	IV111	CEPrescue	18.359	3.7	5.28128	9.41382	4.13254	1	0.29777	2.80315	1.23055
00000003_7.tif	predator	IV111	CEPrescue	18.408	2.859	5.28128	10.1527	4.87145	1	0.29777	3.02318	1.45057
00000003_7.tif	predator	IV111	CEPrescue	18.519	19.641	5.28128	9.66466	4.38338	1	0.29777	2.87785	1.30524
00000003_7.tif	predator	IV111	CEPrescue	18.533	3.964	5.28128	9.29296	4.01168	1	0.29777	2.76716	1.19456
00000003_7.tif	predator	IV111	CEPrescue	20.502	16.595	5.28128	8.86391	3.58263	1	0.29777	2.63941	1.0668
00000003_7.tif	predator	IV111	CEPrescue	20.53	16.887	5.28128	9.05521	3.77393	1	0.29777	2.69637	1.12376
00000003_7.tif	predator	IV111	CEPrescue	20.557	17.276	5.28128	9.31016	4.02888	1	0.29777	2.77229	1.19968
00000003_7.tif	predator	IV111	CEPrescue	21.026	4.811	5.28128	10.3442	5.06291	1	0.29777	3.08019	1.50758
00000003_7.tif	predator	IV111	CEPrescue	22.641	14.214	5.28128	9.80536	4.52408	1	0.29777	2.91974	1.34714
00000003_7.tif	predator	IV111	CEPrescue	23.495	13.38	5.28128	10.4544	5.17307	1	0.29777	3.11299	1.54039
00000003_7.tif	predator	IV111	CEPrescue	23.627	13.637	5.28128	10.6313	5.35	1	0.29777	3.16568	1.59307
00000004_2.tif	control	CB1112	cat2(e1112)	12.12	14.734	4.52081	4.00924	-0.511572	0	0.29777	1.19383	-0.152331
00000004_2.tif	control	CB1112	cat2(e1112)	12.161	14.854	4.52081	4.05593	-0.464884	0	0.29777	1.20773	-0.138428
00000004_2.tif	control	CB1112	cat2(e1112)	12.823	12.578	4.52081	2.41848	-2.10233	0	0.29777	0.72015	-0.626012
00000004_2.tif	control	CB1112	cat2(e1112)	12.849	12.646	4.52081	2.40517	-2.11564	0	0.29777	0.716187	-0.629974
00000004_2.tif	control	CB1112	cat2(e1112)	12.969	10.016	4.52081	3.11176	-1.40905	0	0.29777	0.926588	-0.419573
00000004_2.tif	control	CB1112	cat2(e1112)	13.927	13.865	4.52081	2.11903	-2.40178	0	0.29777	0.630985	-0.715177
00000004_2.tif	control	CB1112	cat2(e1112)	13.974	13.948	4.52081	2.15852	-2.36229	0	0.29777	0.642742	-0.70342
00000004_2.tif	control	CB1112	cat2(e1112)	14.083	12.484	4.52081	1.16614	-3.35467	0	0.29777	0.34724	-0.998921
00000004_2.tif	control	CB1112	cat2(e1112)	14.448	12.745	4.52081	0.948801	-3.57201	0	0.29777	0.282525	-1.06364
00000004_2.tif	control	CB1112	cat2(e1112)	14.641	13.24	4.52081	1.20476	-3.31605	0	0.29777	0.358743	-0.987419
00000004_2.tif	control	CB1112	cat2(e1112)	15.036	15.448	4.52081	3.27552	-1.24529	0	0.29777	0.975351	-0.37081
00000004_2.tif	control	CB1112	cat2(e1112)	15.052	14.474	4.52081	2.30229	-2.21852	0	0.29777	0.685553	-0.660608
00000004_2.tif	control	CB1112	cat2(e1112)	15.141	14.568	4.52081	2.39194	-2.12887	0	0.29777	0.712248	-0.633914
00000004_2.tif	control	CB1112	cat2(e1112)	15.297	13.24	4.52081	1.06672	-3.45409	0	0.29777	0.317637	-1.02852
00000004_2.tif	control	CB1112	cat2(e1112)	15.302	8.911	4.52081	3.26735	-1.25346	0	0.29777	0.97292	-0.373242
00000004_2.tif	control	CB1112	cat2(e1112)	15.38	12.479	4.52081	0.347546	-4.17326	0	0.29777	0.103489	-1.24267
00000004_2.tif	control	CB1112	cat2(e1112)	15.385	14.75	4.52081	2.57908	-1.94173	0	0.29777	0.767973	-0.578189
00000004_2.tif	control	CB1112	cat2(e1112)	15.401	11.917	4.52081	0.323804	-4.19701	0	0.29777	0.0964191	-1.24974
00000004_2.tif	control	CB1112	cat2(e1112)	15.677	9.042	4.52081	3.16989	-1.35092	0	0.29777	0.943897	-0.402264
00000004_2.tif	control	CB1112	cat2(e1112)	15.786	12.891	4.52081	0.918629	-3.60218	0	0.29777	0.27354	-1.07262
00000004_2.tif	control	CB1112	cat2(e1112)	15.943	13.974	4.52081	1.9415	-2.57931	0	0.29777	0.578121	-0.76804
00000004_2.tif	control	CB1112	cat2(e1112)	16.344	13.052	4.52081	1.43392	-3.08689	0	0.29777	0.426978	-0.919184
00000004_2.tif	control	CB1112	cat2(e1112)	16.859	9.807	4.52081	2.88837	-1.63244	0	0.29777	0.860071	-0.486091
00000004_2.tif	control	CB1112	cat2(e1112)	16.865	11.839	4.52081	1.69112	-2.82969	0	0.29777	0.503565	-0.842596
00000004_2.tif	control	CB1112	cat2(e1112)	16.901	11.745	4.52081	1.74725	-2.77356	0	0.29777	0.520278	-0.825884
00000004_2.tif	control	CB1112	cat2(e1112)	17.427	11.609	4.52081	2.29054	-2.23027	0	0.29777	0.682055	-0.664107
00000004_2.tif	control	CB1112	cat2(e1112)	18.356	11.224	4.52081	3.28909	-1.23172	0	0.29777	0.979392	-0.366769
00000004_2.tif	control	CB1112	cat2(e1112)	18.516	13.373	4.52081	3.51757	-1.00324	0	0.29777	1.04743	-0.298736
00000004_2.tif	control	CB1112	cat2(e1112)	18.637	11.161	4.52081	3.57635	-0.944458	0	0.29777	1.06493	-0.281231
00000004_7.tif	predator	IV111	CEPrescue	5.198	14.344	4.40643	9.9155	5.50907	1	0.29777	2.95254	1.64044
00000004_7.tif	predator	IV111	CEPrescue	5.3	14.297	4.40643	9.80348	5.39706	1	0.29777	2.91918	1.60708
00000004_7.tif	predator	IV111	CEPrescue	5.55	14.304	4.40643	9.57233	5.16591	1	0.29777	2.85035	1.53825
00000004_7.tif	predator	IV111	CEPrescue	5.655	14.29	4.40643	9.46938	5.06295	1	0.29777	2.8197	1.50759
00000004_7.tif	predator	IV111	CEPrescue	5.71	14.22	4.40643	9.39283	4.98641	1	0.29777	2.7969	1.4848
00000004_7.tif	predator	IV111	CEPrescue	5.724	14.95	4.40643	9.66578	5.25935	1	0.29777	2.87818	1.56608
00000004_7.tif	predator	IV111	CEPrescue	6.661	13.137	4.40643	8.14452	3.7381	1	0.29777	2.42519	1.11309
00000004_7.tif	predator	IV111	CEPrescue	7.418	13.547	4.40643	7.55711	3.15069	1	0.29777	2.25028	0.938181
00000004_7.tif	predator	IV111	CEPrescue	7.446	10.811	4.40643	7.03313	2.62671	1	0.29777	2.09426	0.782154
00000004_7.tif	predator	IV111	CEPrescue	7.557	11.019	4.40643	6.92397	2.51754	1	0.29777	2.06175	0.749648
00000004_7.tif	predator	IV111	CEPrescue	7.786	10.54	4.40643	6.70036	2.29394	1	0.29777	1.99517	0.683065
00000004_7.tif	predator	IV111	CEPrescue	8.377	19.811	4.40643	10.838	6.43158	1	0.29777	3.22723	1.91513
00000004_7.tif	predator	IV111	CEPrescue	8.523	6.797	4.40643	7.20647	2.80004	1	0.29777	2.14587	0.833769
00000004_7.tif	predator	IV111	CEPrescue	8.849	6.887	4.40643	6.88723	2.48081	1	0.29777	2.05081	0.73871
00000004_7.tif	predator	IV111	CEPrescue	9.932	14.144	4.40643	5.61242	1.206	1	0.29777	1.67121	0.35911
00000004_7.tif	predator	IV111	CEPrescue	9.953	17.734	4.40643	8.23523	3.82881	1	0.29777	2.45221	1.1401
00000004_7.tif	predator	IV111	CEPrescue	10.189	13.095	4.40643	4.84006	0.433635	1	0.29777	1.44122	0.129123
00000004_7.tif	predator	IV111	CEPrescue	10.405	13.095	4.40643	4.64968	0.243258	1	0.29777	1.38454	0.072435
00000004_7.tif	predator	IV111	CEPrescue	10.8	1.613	4.40643	9.94641	5.53999	1	0.29777	2.96174	1.64964
00000004_7.tif	predator	IV111	CEPrescue	10.905	19.797	4.40643	9.63072	5.22429	1	0.29777	2.86774	1.55564
00000004_7.tif	predator	IV111	CEPrescue	10.911	13.318	4.40643	4.33612	-0.0703073	0	0.29777	1.29117	-0.0209354
00000004_7.tif	predator	IV111	CEPrescue	11.314	3.182	4.40643	8.29921	3.89278	1	0.29777	2.47125	1.15915
00000004_7.tif	predator	IV111	CEPrescue	11.405	7.908	4.40643	4.25774	-0.14868	0	0.29777	1.26783	-0.0442726
00000004_7.tif	predator	IV111	CEPrescue	11.71	13.436	4.40643	3.78604	-0.620387	0	0.29777	1.12737	-0.184733
00000004_7.tif	predator	IV111	CEPrescue	11.786	10.457	4.40643	2.72211	-1.68432	0	0.29777	0.810561	-0.50154
00000004_7.tif	predator	IV111	CEPrescue	12.175	10.915	4.40643	2.30481	-2.10162	0	0.29777	0.686302	-0.625799
00000004_7.tif	predator	IV111	CEPrescue	12.3	7.234	4.40643	4.22521	-0.18121	0	0.29777	1.25814	-0.053959
00000004_7.tif	predator	IV111	CEPrescue	12.405	11.776	4.40643	2.2697	-2.13672	0	0.29777	0.67585	-0.636251
00000004_7.tif	predator	IV111	CEPrescue	12.488	7.193	4.40643	4.16737	-0.239052	0	0.29777	1.24092	-0.0711825
00000004_7.tif	predator	IV111	CEPrescue	12.561	15.984	4.40643	5.47683	1.0704	1	0.29777	1.63083	0.318733
00000004_7.tif	predator	IV111	CEPrescue	12.821	19.304	4.40643	8.61112	4.2047	1	0.29777	2.56413	1.25203
00000004_7.tif	predator	IV111	CEPrescue	12.87	19.255	4.40643	8.55369	4.14727	1	0.29777	2.54703	1.23493
00000004_7.tif	predator	IV111	CEPrescue	12.946	2.53	4.40643	8.46399	4.05756	1	0.29777	2.52032	1.20822
00000004_7.tif	predator	IV111	CEPrescue	12.953	2.606	4.40643	8.38798	3.98155	1	0.29777	2.49769	1.18559
00000004_7.tif	predator	IV111	CEPrescue	13.134	8.693	4.40643	2.54538	-1.86105	0	0.29777	0.757937	-0.554164
00000004_7.tif	predator	IV111	CEPrescue	13.286	10.436	4.40643	1.26411	-3.14232	0	0.29777	0.376414	-0.935687
00000004_7.tif	predator	IV111	CEPrescue	13.3	20.283	4.40643	9.50243	5.096	1	0.29777	2.82954	1.51744
00000004_7.tif	predator	IV111	CEPrescue	13.825	19.693	4.40643	8.86316	4.45674	1	0.29777	2.63918	1.32708
00000004_7.tif	predator	IV111	CEPrescue	13.984	10.884	4.40643	0.495908	-3.91052	0	0.29777	0.147667	-1.16443
00000004_7.tif	predator	IV111	CEPrescue	14.033	12.127	4.40643	1.34887	-3.05756	0	0.29777	0.401652	-0.910449
00000004_7.tif	predator	IV111	CEPrescue	14.061	11.613	4.40643	0.86649	-3.53994	0	0.29777	0.258015	-1.05409
00000004_7.tif	predator	IV111	CEPrescue	14.616	3.422	4.40643	7.43326	3.02684	1	0.29777	2.2134	0.901301
00000004_7.tif	predator	IV111	CEPrescue	14.672	8.557	4.40643	2.30509	-2.10133	0	0.29777	0.686388	-0.625713
00000004_7.tif	predator	IV111	CEPrescue	15.95	12.127	4.40643	1.94535	-2.46108	0	0.29777	0.579266	-0.732836
00000004_7.tif	predator	IV111	CEPrescue	16.151	8.273	4.40643	3.07525	-1.33118	0	0.29777	0.915716	-0.396385
00000004_7.tif	predator	IV111	CEPrescue	16.276	8.252	4.40643	3.16222	-1.24421	0	0.29777	0.941613	-0.370488
00000004_7.tif	predator	IV111	CEPrescue	16.345	2.422	4.40643	8.636	4.22958	1	0.29777	2.57154	1.25944
00000004_7.tif	predator	IV111	CEPrescue	17.814	11.28	4.40643	3.3621	-1.04433	0	0.29777	1.00113	-0.310969
00000004_7.tif	predator	IV111	CEPrescue	19.46	11.432	4.40643	5.01442	0.607998	1	0.29777	1.49314	0.181044
00000004_7.tif	predator	IV111	CEPrescue	19.557	13.286	4.40643	5.63034	1.22391	1	0.29777	1.67655	0.364445
00000004_7.tif	predator	IV111	CEPrescue	19.62	17.613	4.40643	8.49199	4.08557	1	0.29777	2.52866	1.21656
00000004_7.tif	predator	IV111	CEPrescue	19.995	13.786	4.40643	6.24683	1.8404	1	0.29777	1.86012	0.548017
00000004_7.tif	predator	IV111	CEPrescue	20.189	9.616	4.40643	5.84267	1.43624	1	0.29777	1.73977	0.427669
00000004_7.tif	predator	IV111	CEPrescue	20.675	2.877	4.40643	10.1006	5.69422	1	0.29777	3.00767	1.69557
00000004_7.tif	predator	IV111	CEPrescue	20.877	18.155	4.40643	9.70768	5.30125	1	0.29777	2.89066	1.57855
00000004_7.tif	predator	IV111	CEPrescue	20.884	9.97	4.40643	6.46572	2.05929	1	0.29777	1.9253	0.613195
00000004_7.tif	predator	IV111	CEPrescue	21.571	18.3	4.40643	10.283	5.87654	1	0.29777	3.06196	1.74986
00000004_7.tif	predator	IV111	CEPrescue	21.668	8.547	4.40643	7.5501	3.14367	1	0.29777	2.24819	0.936091
00000004_7.tif	predator	IV111	CEPrescue	21.814	7.415	4.40643	8.10117	3.69474	1	0.29777	2.41229	1.10018
00000004_7.tif	predator	IV111	CEPrescue	21.939	14.745	4.40643	8.41377	4.00734	1	0.29777	2.50537	1.19327
00000004_7.tif	predator	IV111	CEPrescue	22.043	14.724	4.40643	8.49653	4.0901	1	0.29777	2.53001	1.21791
00000004_7.tif	predator	IV111	CEPrescue	22.245	10.061	4.40643	7.80638	3.39996	1	0.29777	2.32451	1.01241
00000004_7.tif	predator	IV111	CEPrescue	22.259	8.325	4.40643	8.18072	3.7743	1	0.29777	2.43597	1.12387
00000004_7.tif	predator	IV111	CEPrescue	22.314	8.193	4.40643	8.27455	3.86812	1	0.29777	2.46391	1.15181
00000004_7.tif	predator	IV111	CEPrescue	22.363	8.644	4.40643	8.18789	3.78147	1	0.29777	2.43811	1.12601
00000004_7.tif	predator	IV111	CEPrescue	22.418	4.224	4.40643	10.3433	5.93691	1	0.29777	3.07994	1.76783
00000004_7.tif	predator	IV111	CEPrescue	22.425	8.755	4.40643	8.21856	3.81213	1	0.29777	2.44724	1.13514
00000004_7.tif	predator	IV111	CEPrescue	22.46	11.016	4.40643	7.98264	3.57622	1	0.29777	2.37699	1.06489
00000004_7.tif	predator	IV111	CEPrescue	22.467	10.196	4.40643	8.01506	3.60863	1	0.29777	2.38664	1.07454
00000004_7.tif	predator	IV111	CEPrescue	22.557	4.321	4.40643	10.3891	5.98271	1	0.29777	3.09357	1.78147
00000004_7.tif	predator	IV111	CEPrescue	22.564	12.057	4.40643	8.17401	3.76758	1	0.29777	2.43397	1.12187
00000004_7.tif	predator	IV111	CEPrescue	22.62	15.641	4.40643	9.44411	5.03769	1	0.29777	2.81217	1.50007
00000004_7.tif	predator	IV111	CEPrescue	22.766	7.043	4.40643	9.1213	4.71487	1	0.29777	2.71605	1.40395
00000004_7.tif	predator	IV111	CEPrescue	22.953	7.467	4.40643	9.12581	4.71939	1	0.29777	2.71739	1.40529
00000004_7.tif	predator	IV111	CEPrescue	23.398	6.738	4.40643	9.82293	5.41651	1	0.29777	2.92497	1.61287
00000004_7.tif	predator	IV111	CEPrescue	23.432	11.995	4.40643	9.02541	4.61899	1	0.29777	2.6875	1.3754
00000004_7.tif	predator	IV111	CEPrescue	23.634	8.905	4.40643	9.36016	4.95374	1	0.29777	2.78718	1.47507
00000004_7.tif	predator	IV111	CEPrescue	23.634	8.835	4.40643	9.37499	4.96856	1	0.29777	2.79159	1.47949
00000004_7.tif	predator	IV111	CEPrescue	23.738	10.724	4.40643	9.25991	4.85349	1	0.29777	2.75732	1.44522
00000004_7.tif	predator	IV111	CEPrescue	23.78	15.384	4.40643	10.3455	5.93908	1	0.29777	3.08058	1.76848
00000004_7.tif	predator	IV111	CEPrescue	23.967	9.293	4.40643	9.61555	5.20913	1	0.29777	2.86322	1.55112
00000004_7.tif	predator	IV111	CEPrescue	24.092	8.12	4.40643	9.99422	5.5878	1	0.29777	2.97598	1.66388
00000004_7.tif	predator	IV111	CEPrescue	24.564	15.509	4.40643	11.1075	6.70106	1	0.29777	3.30748	1.99537
00000004_7.tif	predator	IV111	CEPrescue	24.62	14.116	4.40643	10.6527	6.2463	1	0.29777	3.17206	1.85996
00000004_7.tif	predator	IV111	CEPrescue	24.661	12.335	4.40643	10.2891	5.88272	1	0.29777	3.0638	1.7517
00000004_7.tif	predator	IV111	CEPrescue	25.023	14.547	4.40643	11.172	6.7656	1	0.29777	3.32669	2.01459
00000004_7.tif	predator	IV111	CEPrescue	25.231	9.703	4.40643	10.8134	6.40701	1	0.29777	3.21992	1.90781
00000004_7.tif	predator	IV111	CEPrescue	25.259	9.891	4.40643	10.8229	6.4165	1	0.29777	3.22274	1.91064
00000004_7.tif	predator	IV111	CEPrescue	25.28	9.807	4.40643	10.8516	6.4452	1	0.29777	3.23129	1.91919
00000005_5.tif	predator	CB1112	cat2(e1112)	10.875	11.25	4.82288	4.16046	-0.662425	0	0.29777	1.23886	-0.19725
00000005_5.tif	predator	CB1112	cat2(e1112)	11.526	10.594	4.82288	3.67476	-1.14812	0	0.29777	1.09423	-0.341875
00000005_5.tif	predator	CB1112	cat2(e1112)	11.583	12.245	4.82288	3.4469	-1.37598	0	0.29777	1.02638	-0.409727
00000005_5.tif	predator	CB1112	cat2(e1112)	12.49	11.24	4.82288	2.56998	-2.2529	0	0.29777	0.765263	-0.670846
00000005_5.tif	predator	CB1112	cat2(e1112)	12.776	14.146	4.82288	3.23844	-1.58444	0	0.29777	0.96431	-0.471799
00000005_5.tif	predator	CB1112	cat2(e1112)	12.911	14.156	4.82288	3.15475	-1.66814	0	0.29777	0.939388	-0.496721
00000005_5.tif	predator	CB1112	cat2(e1112)	13.594	14.823	4.82288	3.34123	-1.48165	0	0.29777	0.994917	-0.441192
00000005_5.tif	predator	CB1112	cat2(e1112)	13.609	15.599	4.82288	4.05316	-0.769718	0	0.29777	1.20691	-0.229199
00000005_5.tif	predator	CB1112	cat2(e1112)	13.677	14.906	4.82288	3.38339	-1.43949	0	0.29777	1.00747	-0.428637
00000005_5.tif	predator	CB1112	cat2(e1112)	13.74	14.438	4.82288	2.93069	-1.8922	0	0.29777	0.87267	-0.563439
00000005_5.tif	predator	CB1112	cat2(e1112)	14.188	8.208	4.82288	3.67483	-1.14805	0	0.29777	1.09426	-0.341854
00000005_5.tif	predator	CB1112	cat2(e1112)	14.719	12.135	4.82288	0.443407	-4.37947	0	0.29777	0.132033	-1.30408
00000005_5.tif	predator	CB1112	cat2(e1112)	15.115	14.906	4.82288	3.11612	-1.70676	0	0.29777	0.927888	-0.508221
00000005_5.tif	predator	CB1112	cat2(e1112)	15.203	14.854	4.82288	3.06872	-1.75416	0	0.29777	0.913773	-0.522336
00000005_5.tif	predator	CB1112	cat2(e1112)	15.74	16.505	4.82288	4.77074	-0.0521396	0	0.29777	1.42058	-0.0155256
00000005_5.tif	predator	CB1112	cat2(e1112)	15.88	14.781	4.82288	3.11585	-1.70703	0	0.29777	0.927807	-0.508302
00000005_5.tif	predator	CB1112	cat2(e1112)	16.62	12.677	4.82288	1.84598	-2.97691	0	0.29777	0.549676	-0.886433
00000005_5.tif	predator	CB1112	cat2(e1112)	17.12	7.792	4.82288	4.52707	-0.295806	0	0.29777	1.34803	-0.0880823
00000005_5.tif	predator	CB1112	cat2(e1112)	17.682	13.036	4.82288	2.95646	-1.86642	0	0.29777	0.880345	-0.555764
00000005_5.tif	predator	CB1112	cat2(e1112)	18.427	12.667	4.82288	3.53694	-1.28594	0	0.29777	1.0532	-0.382914
00000005_5.tif	predator	CB1112	cat2(e1112)	18.495	12.87	4.82288	3.65747	-1.16541	0	0.29777	1.08909	-0.347023
00000005_7.tif	predator	IV111	CEPrescue	4.193	11.859	6.13015	9.84142	3.71127	1	0.29777	2.93048	1.10511
00000005_7.tif	predator	IV111	CEPrescue	4.686	8.609	6.13015	10.0304	3.90027	1	0.29777	2.98676	1.16138
00000005_7.tif	predator	IV111	CEPrescue	4.887	7.943	6.13015	10.1099	3.97973	1	0.29777	3.01042	1.18504
00000005_7.tif	predator	IV111	CEPrescue	4.908	8.13	6.13015	10.0122	3.88207	1	0.29777	2.98134	1.15596
00000005_7.tif	predator	IV111	CEPrescue	4.915	10.922	6.13015	9.2096	3.07945	1	0.29777	2.74234	0.916967
00000005_7.tif	predator	IV111	CEPrescue	4.922	8.311	6.13015	9.92597	3.79582	1	0.29777	2.95566	1.13028
00000005_7.tif	predator	IV111	CEPrescue	4.97	13.373	6.13015	9.12341	2.99326	1	0.29777	2.71668	0.891303
00000005_7.tif	predator	IV111	CEPrescue	5.019	10.203	6.13015	9.24024	3.11009	1	0.29777	2.75147	0.926092
00000005_7.tif	predator	IV111	CEPrescue	5.082	13.47	6.13015	9.02467	2.89453	1	0.29777	2.68728	0.861903
00000005_7.tif	predator	IV111	CEPrescue	5.165	10.839	6.13015	8.97517	2.84502	1	0.29777	2.67254	0.847162
00000005_7.tif	predator	IV111	CEPrescue	5.422	9.113	6.13015	9.16353	3.03338	1	0.29777	2.72862	0.903249
00000005_7.tif	predator	IV111	CEPrescue	5.582	10.002	6.13015	8.74224	2.6121	1	0.29777	2.60318	0.777804
00000005_7.tif	predator	IV111	CEPrescue	6.45	9.439	6.13015	8.08627	1.95612	1	0.29777	2.40785	0.582473
00000005_7.tif	predator	IV111	CEPrescue	6.568	9.307	6.13015	8.02356	1.89341	1	0.29777	2.38917	0.5638
00000005_7.tif	predator	IV111	CEPrescue	6.651	14.387	6.13015	7.67393	1.54379	1	0.29777	2.28507	0.459693
00000005_7.tif	predator	IV111	CEPrescue	7.312	5.438	6.13015	9.57598	3.44583	1	0.29777	2.85144	1.02607
00000005_7.tif	predator	IV111	CEPrescue	7.318	5.637	6.13015	9.43085	3.3007	1	0.29777	2.80822	0.98285
00000005_7.tif	predator	IV111	CEPrescue	7.332	9.259	6.13015	7.33837	1.20822	1	0.29777	2.18515	0.359773
00000005_7.tif	predator	IV111	CEPrescue	7.457	9.252	6.13015	7.22744	1.0973	1	0.29777	2.15212	0.326742
00000005_7.tif	predator	IV111	CEPrescue	7.832	11.464	6.13015	6.24571	0.115558	1	0.29777	1.85978	0.0344097
00000005_7.tif	predator	IV111	CEPrescue	8.22	17.606	6.13015	7.8883	1.75815	1	0.29777	2.3489	0.523524
00000005_7.tif	predator	IV111	CEPrescue	8.297	17.266	6.13015	7.60404	1.47389	1	0.29777	2.26426	0.438881
00000005_7.tif	predator	IV111	CEPrescue	8.311	9.71	6.13015	6.26054	0.130392	1	0.29777	1.8642	0.0388269
00000005_7.tif	predator	IV111	CEPrescue	8.422	18.641	6.13015	8.48796	2.35781	1	0.29777	2.52746	0.702085
00000005_7.tif	predator	IV111	CEPrescue	8.547	19.422	6.13015	9.01265	2.8825	1	0.29777	2.6837	0.858321
00000005_7.tif	predator	IV111	CEPrescue	8.811	5.672	6.13015	8.40697	2.27682	1	0.29777	2.50334	0.677968
00000005_7.tif	predator	IV111	CEPrescue	9.241	5.547	6.13015	8.24871	2.11856	1	0.29777	2.45622	0.630844
00000005_7.tif	predator	IV111	CEPrescue	9.29	13.734	6.13015	4.9583	-1.17185	0	0.29777	1.47643	-0.348942
00000005_7.tif	predator	IV111	CEPrescue	9.408	5.512	6.13015	8.18184	2.05169	1	0.29777	2.43631	0.610931
00000005_7.tif	predator	IV111	CEPrescue	10.089	11.352	6.13015	4.0417	-2.08844	0	0.29777	1.2035	-0.621876
00000005_7.tif	predator	IV111	CEPrescue	10.477	18.769	6.13015	7.4084	1.27825	1	0.29777	2.206	0.380626
00000005_7.tif	predator	IV111	CEPrescue	10.498	7.727	6.13015	5.74885	-0.381295	0	0.29777	1.71184	-0.113538
00000005_7.tif	predator	IV111	CEPrescue	10.595	20.332	6.13015	8.76539	2.63525	1	0.29777	2.61007	0.784697
00000005_7.tif	predator	IV111	CEPrescue	10.776	20.068	6.13015	8.45185	2.3217	1	0.29777	2.51671	0.691332
00000005_7.tif	predator	IV111	CEPrescue	10.832	11.616	6.13015	3.25947	-2.87068	0	0.29777	0.970572	-0.854802
00000005_7.tif	predator	IV111	CEPrescue	10.859	18.589	6.13015	7.07179	0.941643	1	0.29777	2.10577	0.280393
00000005_7.tif	predator	IV111	CEPrescue	10.964	12.158	6.13015	3.0639	-3.06624	0	0.29777	0.912339	-0.913035
00000005_7.tif	predator	IV111	CEPrescue	11.047	18.859	6.13015	7.23478	1.10464	1	0.29777	2.1543	0.328927
00000005_7.tif	predator	IV111	CEPrescue	11.825	14.811	6.13015	3.36473	-2.76541	0	0.29777	1.00192	-0.823458
00000005_7.tif	predator	IV111	CEPrescue	11.852	21.186	6.13015	9.1811	3.05096	1	0.29777	2.73386	0.908483
00000005_7.tif	predator	IV111	CEPrescue	12.207	15.797	6.13015	3.97199	-2.15816	0	0.29777	1.18274	-0.642634
00000005_7.tif	predator	IV111	CEPrescue	12.241	14.734	6.13015	3.04586	-3.08429	0	0.29777	0.906965	-0.918409
00000005_7.tif	predator	IV111	CEPrescue	12.304	3.922	6.13015	8.51984	2.38969	1	0.29777	2.53695	0.711578
00000005_7.tif	predator	IV111	CEPrescue	12.554	19.943	6.13015	7.81685	1.6867	1	0.29777	2.32762	0.502249
00000005_7.tif	predator	IV111	CEPrescue	12.561	1.349	6.13015	11.0149	4.88471	1	0.29777	3.27989	1.45452
00000005_7.tif	predator	IV111	CEPrescue	13.193	3.061	6.13015	9.24261	3.11247	1	0.29777	2.75217	0.926799
00000005_7.tif	predator	IV111	CEPrescue	13.45	20.276	6.13015	8.03068	1.90054	1	0.29777	2.3913	0.565923
00000005_7.tif	predator	IV111	CEPrescue	13.519	8.901	6.13015	3.40298	-2.72717	0	0.29777	1.01331	-0.812069
00000005_7.tif	predator	IV111	CEPrescue	13.727	9.339	6.13015	2.94223	-3.18792	0	0.29777	0.876108	-0.949266
00000005_7.tif	predator	IV111	CEPrescue	14.214	6.328	6.13015	5.94098	-0.189172	0	0.29777	1.76904	-0.0563298
00000005_7.tif	predator	IV111	CEPrescue	14.269	2.505	6.13015	9.76402	3.63388	1	0.29777	2.90743	1.08206
00000005_7.tif	predator	IV111	CEPrescue	14.325	2.304	6.13015	9.96649	3.83634	1	0.29777	2.96772	1.14235
00000005_7.tif	predator	IV111	CEPrescue	14.498	9.575	6.13015	2.73208	-3.39807	0	0.29777	0.813532	-1.01184
00000005_7.tif	predator	IV111	CEPrescue	14.655	19.8	6.13015	7.56021	1.43006	1	0.29777	2.2512	0.42583
00000005_7.tif	predator	IV111	CEPrescue	14.766	2.63	6.13015	9.66437	3.53422	1	0.29777	2.87776	1.05239
00000005_7.tif	predator	IV111	CEPrescue	14.766	2.79	6.13015	9.50485	3.3747	1	0.29777	2.83026	1.00489
00000005_7.tif	predator	IV111	CEPrescue	15.057	6.519	6.13015	5.83875	-0.2914	0	0.29777	1.7386	-0.0867703
00000005_7.tif	predator	IV111	CEPrescue	15.057	7.068	6.13015	5.29926	-0.830887	0	0.29777	1.57796	-0.247413
00000005_7.tif	predator	IV111	CEPrescue	15.238	19.946	6.13015	7.77505	1.6449	1	0.29777	2.31518	0.489801
00000005_7.tif	predator	IV111	CEPrescue	15.536	1.769	6.13015	10.6051	4.4749	1	0.29777	3.15787	1.33249
00000005_7.tif	predator	IV111	CEPrescue	15.543	7.859	6.13015	4.66079	-1.46936	0	0.29777	1.38784	-0.437531
00000005_7.tif	predator	IV111	CEPrescue	15.564	6.491	6.13015	5.97629	-0.153855	0	0.29777	1.77956	-0.0458135
00000005_7.tif	predator	IV111	CEPrescue	15.578	6.602	6.13015	5.87278	-0.257363	0	0.29777	1.74874	-0.076635
00000005_7.tif	predator	IV111	CEPrescue	15.627	4.727	6.13015	7.70712	1.57697	1	0.29777	2.29495	0.469576
00000005_7.tif	predator	IV111	CEPrescue	15.641	6.158	6.13015	6.3179	0.187755	1	0.29777	1.88128	0.0559077
00000005_7.tif	predator	IV111	CEPrescue	15.655	1.748	6.13015	10.6434	4.51325	1	0.29777	3.16929	1.34391
00000005_7.tif	predator	IV111	CEPrescue	15.689	4.665	6.13015	7.78079	1.65065	1	0.29777	2.31689	0.491513
00000005_7.tif	predator	IV111	CEPrescue	16.696	7.352	6.13015	5.59252	-0.537626	0	0.29777	1.66529	-0.160089
00000005_7.tif	predator	IV111	CEPrescue	16.828	15.623	6.13015	4.37272	-1.75743	0	0.29777	1.30206	-0.52331
00000005_7.tif	predator	IV111	CEPrescue	17.439	3.887	6.13015	9.04744	2.91729	1	0.29777	2.69406	0.868683
00000005_7.tif	predator	IV111	CEPrescue	17.606	16.22	6.13015	5.3339	-0.796245	0	0.29777	1.58828	-0.237098
00000005_7.tif	predator	IV111	CEPrescue	17.661	16.109	6.13015	5.28979	-0.840358	0	0.29777	1.57514	-0.250233
00000005_7.tif	predator	IV111	CEPrescue	17.696	16.623	6.13015	5.6967	-0.433451	0	0.29777	1.69631	-0.129069
00000005_7.tif	predator	IV111	CEPrescue	18.599	7.332	6.13015	6.72731	0.597161	1	0.29777	2.00319	0.177817
00000005_7.tif	predator	IV111	CEPrescue	18.793	11.977	6.13015	4.77575	-1.3544	0	0.29777	1.42208	-0.403298
00000005_7.tif	predator	IV111	CEPrescue	18.863	6.679	6.13015	7.38993	1.25979	1	0.29777	2.2005	0.375127
00000005_7.tif	predator	IV111	CEPrescue	18.905	10.481	6.13015	5.19527	-0.934874	0	0.29777	1.547	-0.278377
00000005_7.tif	predator	IV111	CEPrescue	19.363	10.307	6.13015	5.68518	-0.44497	0	0.29777	1.69288	-0.132499
00000005_7.tif	predator	IV111	CEPrescue	19.405	18.606	6.13015	8.3144	2.18425	1	0.29777	2.47578	0.650405
00000005_7.tif	predator	IV111	CEPrescue	19.488	18.55	6.13015	8.32599	2.19584	1	0.29777	2.47923	0.653856
00000005_7.tif	predator	IV111	CEPrescue	19.509	10.564	6.13015	5.74109	-0.38906	0	0.29777	1.70952	-0.11585
00000005_7.tif	predator	IV111	CEPrescue	19.752	6.88	6.13015	7.86105	1.7309	1	0.29777	2.34078	0.51541
00000005_7.tif	predator	IV111	CEPrescue	20.127	12.512	6.13015	6.10596	-0.0241902	0	0.29777	1.81817	-0.0072031
00000005_7.tif	predator	IV111	CEPrescue	20.488	6.984	6.13015	8.34608	2.21593	1	0.29777	2.48521	0.659837
00000005_7.tif	predator	IV111	CEPrescue	20.703	8.592	6.13015	7.62106	1.49092	1	0.29777	2.26932	0.44395
00000005_7.tif	predator	IV111	CEPrescue	20.738	4.8	6.13015	10.0395	3.90938	1	0.29777	2.98947	1.1641
00000005_7.tif	predator	IV111	CEPrescue	20.981	18.835	6.13015	9.56681	3.43666	1	0.29777	2.84871	1.02333
00000005_7.tif	predator	IV111	CEPrescue	21.03	16.349	6.13015	8.10721	1.97707	1	0.29777	2.41408	0.588711
00000005_7.tif	predator	IV111	CEPrescue	21.057	6.97	6.13015	8.80242	2.67227	1	0.29777	2.6211	0.795722
00000005_7.tif	predator	IV111	CEPrescue	21.099	16.175	6.13015	8.08131	1.95116	1	0.29777	2.40637	0.580998
00000005_7.tif	predator	IV111	CEPrescue	21.189	10.405	6.13015	7.4008	1.27066	1	0.29777	2.20374	0.378363
00000005_7.tif	predator	IV111	CEPrescue	22.148	10.182	6.13015	8.3851	2.25495	1	0.29777	2.49683	0.671458
00000005_7.tif	predator	IV111	CEPrescue	22.168	10.266	6.13015	8.38404	2.25389	1	0.29777	2.49652	0.671142
00000005_7.tif	predator	IV111	CEPrescue	22.293	11.415	6.13015	8.31069	2.18054	1	0.29777	2.47467	0.649299
00000005_7.tif	predator	IV111	CEPrescue	22.321	14.901	6.13015	8.70346	2.57331	1	0.29777	2.59163	0.766256
00000005_7.tif	predator	IV111	CEPrescue	22.349	17.648	6.13015	9.91152	3.78137	1	0.29777	2.95135	1.12598
00000005_7.tif	predator	IV111	CEPrescue	22.398	14.7	6.13015	8.71864	2.5885	1	0.29777	2.59615	0.770776
00000005_7.tif	predator	IV111	CEPrescue	22.53	11.429	6.13015	8.54509	2.41494	1	0.29777	2.54447	0.719098
00000005_7.tif	predator	IV111	CEPrescue	22.703	15.891	6.13015	9.40377	3.27363	1	0.29777	2.80016	0.974788
00000005_7.tif	predator	IV111	CEPrescue	22.87	6.45	6.13015	10.585	4.45485	1	0.29777	3.15189	1.32652
00000005_7.tif	predator	IV111	CEPrescue	22.953	15.96	6.13015	9.66111	3.53096	1	0.29777	2.87679	1.05141
00000005_7.tif	predator	IV111	CEPrescue	22.967	6.568	6.13015	10.6023	4.47215	1	0.29777	3.15705	1.33167
00000005_7.tif	predator	IV111	CEPrescue	23.696	13.922	6.13015	9.81077	3.68062	1	0.29777	2.92135	1.09598
00000005_7.tif	predator	IV111	CEPrescue	23.793	14.047	6.13015	9.92805	3.79791	1	0.29777	2.95628	1.1309
00000005_7.tif	predator	IV111	CEPrescue	23.828	14.214	6.13015	9.99369	3.86355	1	0.29777	2.97582	1.15045
00000005_7.tif	predator	IV111	CEPrescue	23.995	15.491	6.13015	10.4777	4.34752	1	0.29777	3.11994	1.29456
00000005_7.tif	predator	IV111	CEPrescue	24.224	10.856	6.13015	10.295	4.16487	1	0.29777	3.06555	1.24017
00000006_9.tif	control	IV552	APDErescue	6.547	12.387	4.974	6.77974	1.80575	1	0.29777	2.0188	0.537697
00000006_9.tif	control	IV552	APDErescue	6.802	14.177	4.974	7.1163	2.14231	1	0.29777	2.11902	0.637915
00000006_9.tif	control	IV552	APDErescue	6.908	11.179	4.974	6.28639	1.31239	1	0.29777	1.8719	0.39079
00000006_9.tif	control	IV552	APDErescue	7.165	14.332	4.974	6.86498	1.89099	1	0.29777	2.04419	0.56308
00000006_9.tif	control	IV552	APDErescue	7.297	14.318	4.974	6.74257	1.76857	1	0.29777	2.00774	0.526628
00000006_9.tif	control	IV552	APDErescue	7.325	14.339	4.974	6.72835	1.75435	1	0.29777	2.0035	0.522394
00000006_9.tif	control	IV552	APDErescue	7.873	11.47	4.974	5.33679	0.362794	1	0.29777	1.58914	0.108029
00000006_9.tif	control	IV552	APDErescue	7.998	10.894	4.974	5.19725	0.223257	1	0.29777	1.54759	0.0664791
00000006_9.tif	control	IV552	APDErescue	8.339	13.804	4.974	5.58233	0.60833	1	0.29777	1.66225	0.181142
00000006_9.tif	control	IV552	APDErescue	9.495	11.241	4.974	3.70309	-1.27091	0	0.29777	1.10267	-0.378439
00000006_9.tif	control	IV552	APDErescue	9.627	10.727	4.974	3.58033	-1.39367	0	0.29777	1.06611	-0.414992
00000006_9.tif	control	IV552	APDErescue	9.655	10.852	4.974	3.54337	-1.43063	0	0.29777	1.05511	-0.425998
00000006_9.tif	control	IV552	APDErescue	10.259	12.658	4.974	3.34719	-1.62681	0	0.29777	0.996693	-0.484414
00000006_9.tif	control	IV552	APDErescue	10.384	11.658	4.974	2.87468	-2.09931	0	0.29777	0.855994	-0.625112
00000006_9.tif	control	IV552	APDErescue	10.488	14.755	4.974	4.5898	-0.384193	0	0.29777	1.36671	-0.114401
00000006_9.tif	control	IV552	APDErescue	10.523	14.873	4.974	4.66553	-0.308465	0	0.29777	1.38926	-0.0918517
00000006_9.tif	control	IV552	APDErescue	10.724	8.554	4.974	3.5087	-1.46529	0	0.29777	1.04479	-0.43632
00000006_9.tif	control	IV552	APDErescue	10.835	15.873	4.974	5.37126	0.397265	1	0.29777	1.5994	0.118293
00000006_9.tif	control	IV552	APDErescue	11.009	10.505	4.974	2.25025	-2.72375	0	0.29777	0.670057	-0.81105
00000006_9.tif	control	IV552	APDErescue	11.064	9.318	4.974	2.74264	-2.23135	0	0.29777	0.816676	-0.66443
00000006_9.tif	control	IV552	APDErescue	11.064	15.714	4.974	5.12967	0.155676	1	0.29777	1.52746	0.0463555
00000006_9.tif	control	IV552	APDErescue	11.078	15.811	4.974	5.21238	0.238386	1	0.29777	1.55209	0.0709841
00000006_9.tif	control	IV552	APDErescue	11.099	10.248	4.974	2.24126	-2.73274	0	0.29777	0.667379	-0.813727
00000006_9.tif	control	IV552	APDErescue	11.203	11.901	4.974	2.16551	-2.80849	0	0.29777	0.644823	-0.836284
00000006_9.tif	control	IV552	APDErescue	11.252	13.158	4.974	2.86772	-2.10628	0	0.29777	0.85392	-0.627187
00000006_9.tif	control	IV552	APDErescue	11.377	11.88	4.974	1.99794	-2.97606	0	0.29777	0.594925	-0.886182
00000006_9.tif	control	IV552	APDErescue	11.377	13.207	4.974	2.82196	-2.15204	0	0.29777	0.840295	-0.640812
00000006_9.tif	control	IV552	APDErescue	11.405	10.415	4.974	1.89641	-3.07759	0	0.29777	0.564694	-0.916413
00000006_9.tif	control	IV552	APDErescue	11.53	9.144	4.974	2.52725	-2.44675	0	0.29777	0.752538	-0.728568
00000006_9.tif	control	IV552	APDErescue	11.655	10.047	4.974	1.83451	-3.13948	0	0.29777	0.546263	-0.934843
00000006_9.tif	control	IV552	APDErescue	11.766	11.158	4.974	1.43131	-3.54269	0	0.29777	0.426201	-1.05491
00000006_9.tif	control	IV552	APDErescue	11.807	13.943	4.974	3.21058	-1.76342	0	0.29777	0.956014	-0.525093
00000006_9.tif	control	IV552	APDErescue	11.863	12.505	4.974	1.97349	-3.00051	0	0.29777	0.587646	-0.893461
00000006_9.tif	control	IV552	APDErescue	11.905	10.443	4.974	1.42259	-3.55141	0	0.29777	0.423604	-1.0575
00000006_9.tif	control	IV552	APDErescue	11.981	12.575	4.974	1.95031	-3.02368	0	0.29777	0.580745	-0.900362
00000006_9.tif	control	IV552	APDErescue	12.168	13.019	4.974	2.22248	-2.75152	0	0.29777	0.661787	-0.819319
00000006_9.tif	control	IV552	APDErescue	12.28	12.366	4.974	1.60416	-3.36984	0	0.29777	0.477671	-1.00344
00000006_9.tif	control	IV552	APDErescue	12.46	13.658	4.974	2.71194	-2.26206	0	0.29777	0.807534	-0.673573
00000006_9.tif	control	IV552	APDErescue	12.613	10.075	4.974	1.13189	-3.8421	0	0.29777	0.337044	-1.14406
00000006_9.tif	control	IV552	APDErescue	12.703	10.561	4.974	0.690142	-4.28385	0	0.29777	0.205504	-1.2756
00000006_9.tif	control	IV552	APDErescue	12.724	5.255	4.974	5.81096	0.836961	1	0.29777	1.73033	0.249222
00000006_9.tif	control	IV552	APDErescue	12.745	14.616	4.974	3.59701	-1.37699	0	0.29777	1.07108	-0.410026
00000006_9.tif	control	IV552	APDErescue	12.96	4.547	4.974	6.50417	1.53018	1	0.29777	1.93675	0.455641
00000006_9.tif	control	IV552	APDErescue	13.009	10.818	4.974	0.293764	-4.68023	0	0.29777	0.087474	-1.39363
00000006_9.tif	control	IV552	APDErescue	13.016	13.082	4.974	2.04268	-2.93131	0	0.29777	0.60825	-0.872857
00000006_9.tif	control	IV552	APDErescue	13.113	11.019	4.974	0.0847585	-4.88924	0	0.29777	0.0252385	-1.45587
00000006_9.tif	control	IV552	APDErescue	13.161	12.061	4.974	1.0145	-3.95949	0	0.29777	0.302089	-1.17902
00000006_9.tif	control	IV552	APDErescue	13.224	12.797	4.974	1.75027	-3.22372	0	0.29777	0.521179	-0.959928
00000006_9.tif	control	IV552	APDErescue	13.29	10.078	4.974	0.973843	-4.00015	0	0.29777	0.289981	-1.19113
00000006_9.tif	control	IV552	APDErescue	13.297	5.644	4.974	5.404	0.430005	1	0.29777	1.60915	0.128043
00000006_9.tif	control	IV552	APDErescue	13.332	10.05	4.974	1.00664	-3.96735	0	0.29777	0.299748	-1.18136
00000006_9.tif	control	IV552	APDErescue	13.436	13.46	4.974	2.4252	-2.54879	0	0.29777	0.722153	-0.758954
00000006_9.tif	control	IV552	APDErescue	13.45	13.043	4.974	2.01248	-2.96152	0	0.29777	0.599255	-0.881851
00000006_9.tif	control	IV552	APDErescue	13.519	9.509	4.974	1.57217	-3.40183	0	0.29777	0.468145	-1.01296
00000006_9.tif	control	IV552	APDErescue	13.568	13.981	4.974	2.95787	-2.01613	0	0.29777	0.880764	-0.600343
00000006_9.tif	control	IV552	APDErescue	13.589	12.509	4.974	1.51468	-3.45931	0	0.29777	0.451027	-1.03008
00000006_9.tif	control	IV552	APDErescue	13.616	10.127	4.974	1.01259	-3.96141	0	0.29777	0.301518	-1.17959
00000006_9.tif	control	IV552	APDErescue	13.644	9.398	4.974	1.70956	-3.26443	0	0.29777	0.509056	-0.972051
00000006_9.tif	control	IV552	APDErescue	13.686	9.745	4.974	1.39221	-3.58178	0	0.29777	0.414559	-1.06655
00000006_9.tif	control	IV552	APDErescue	13.748	12.634	4.974	1.68125	-3.29275	0	0.29777	0.500625	-0.980482
00000006_9.tif	control	IV552	APDErescue	13.783	9.877	4.974	1.31034	-3.66365	0	0.29777	0.390181	-1.09093
00000006_9.tif	control	IV552	APDErescue	13.95	11.773	4.974	1.04887	-3.92513	0	0.29777	0.312322	-1.16879
00000006_9.tif	control	IV552	APDErescue	14.22	9.488	4.974	1.86687	-3.10712	0	0.29777	0.555898	-0.925208
00000006_9.tif	control	IV552	APDErescue	14.29	9.425	4.974	1.95814	-3.01586	0	0.29777	0.583074	-0.898033
00000006_9.tif	control	IV552	APDErescue	14.339	10.106	4.974	1.48283	-3.49116	0	0.29777	0.441544	-1.03956
00000006_9.tif	control	IV552	APDErescue	14.345	12.648	4.974	1.97239	-3.00161	0	0.29777	0.587317	-0.89379
00000006_9.tif	control	IV552	APDErescue	14.345	9.543	4.974	1.8945	-3.0795	0	0.29777	0.564124	-0.916982
00000006_9.tif	control	IV552	APDErescue	14.373	6.269	4.974	4.92155	-0.052443	0	0.29777	1.46549	-0.0156159
00000006_9.tif	control	IV552	APDErescue	14.408	8.661	4.974	2.67754	-2.29646	0	0.29777	0.797291	-0.683816
00000006_9.tif	control	IV552	APDErescue	14.568	11.3	4.974	1.39808	-3.57591	0	0.29777	0.416307	-1.0648
00000006_9.tif	control	IV552	APDErescue	14.686	7.752	4.974	3.61747	-1.35653	0	0.29777	1.07717	-0.403933
00000006_9.tif	control	IV552	APDErescue	14.79	8.335	4.974	3.14728	-1.82672	0	0.29777	0.937165	-0.543942
00000006_9.tif	control	IV552	APDErescue	14.852	10.231	4.974	1.84882	-3.12518	0	0.29777	0.550523	-0.930584
00000006_9.tif	control	IV552	APDErescue	14.887	8.314	4.974	3.21542	-1.75858	0	0.29777	0.957456	-0.523651
00000006_9.tif	control	IV552	APDErescue	14.901	13.773	4.974	3.21688	-1.75711	0	0.29777	0.957891	-0.523215
00000006_9.tif	control	IV552	APDErescue	14.991	12.474	4.974	2.29546	-2.67854	0	0.29777	0.683519	-0.797588
00000006_9.tif	control	IV552	APDErescue	14.998	10.266	4.974	1.96672	-3.00728	0	0.29777	0.58563	-0.895477
00000006_9.tif	control	IV552	APDErescue	15.019	9.474	4.974	2.4101	-2.56389	0	0.29777	0.717657	-0.76345
00000006_9.tif	control	IV552	APDErescue	15.13	9.668	4.974	2.37773	-2.59626	0	0.29777	0.708017	-0.773089
00000006_9.tif	control	IV552	APDErescue	15.193	10.481	4.974	2.07855	-2.89545	0	0.29777	0.618929	-0.862178
00000006_9.tif	control	IV552	APDErescue	15.644	10.113	4.974	2.62293	-2.35107	0	0.29777	0.78103	-0.700077
00000006_9.tif	control	IV552	APDErescue	15.672	9.981	4.974	2.69848	-2.27552	0	0.29777	0.803527	-0.67758
00000006_9.tif	control	IV552	APDErescue	15.679	8.474	4.974	3.57778	-1.39621	0	0.29777	1.06536	-0.415751
00000006_9.tif	control	IV552	APDErescue	15.755	6.87	4.974	4.90012	-0.0738763	0	0.29777	1.45911	-0.0219981
00000006_9.tif	control	IV552	APDErescue	15.811	12.453	4.974	2.97166	-2.00234	0	0.29777	0.884871	-0.596236
00000006_9.tif	control	IV552	APDErescue	15.852	9.092	4.974	3.30035	-1.67365	0	0.29777	0.982745	-0.498362
00000006_9.tif	control	IV552	APDErescue	15.88	9.036	4.974	3.3562	-1.61779	0	0.29777	0.999376	-0.481731
00000006_9.tif	control	IV552	APDErescue	15.887	9.252	4.974	3.23723	-1.73677	0	0.29777	0.96395	-0.517157
00000006_9.tif	control	IV552	APDErescue	16.033	12.224	4.974	3.07424	-1.89976	0	0.29777	0.915415	-0.565691
00000006_9.tif	control	IV552	APDErescue	16.13	9.446	4.974	3.34502	-1.62897	0	0.29777	0.996047	-0.48506
00000006_9.tif	control	IV552	APDErescue	16.137	9.634	4.974	3.26553	-1.70846	0	0.29777	0.972378	-0.508729
00000006_9.tif	control	IV552	APDErescue	16.2	8.898	4.974	3.69598	-1.27802	0	0.29777	1.10055	-0.380556
00000006_9.tif	control	IV552	APDErescue	16.227	9.266	4.974	3.51811	-1.45588	0	0.29777	1.04759	-0.433518
00000006_9.tif	control	IV552	APDErescue	16.234	9.516	4.974	3.40465	-1.56935	0	0.29777	1.0138	-0.467304
00000006_9.tif	control	IV552	APDErescue	16.276	8.78	4.974	3.82677	-1.14722	0	0.29777	1.1395	-0.341609
00000006_9.tif	control	IV552	APDErescue	16.38	8.634	4.974	3.99744	-0.976555	0	0.29777	1.19032	-0.290789
00000006_9.tif	control	IV552	APDErescue	16.443	5.693	4.974	6.26321	1.28922	1	0.29777	1.865	0.38389
00000006_9.tif	control	IV552	APDErescue	16.464	9.564	4.974	3.59148	-1.38252	0	0.29777	1.06944	-0.411672
00000006_9.tif	control	IV552	APDErescue	16.477	9.668	4.974	3.56178	-1.41221	0	0.29777	1.06059	-0.420515
00000006_9.tif	control	IV552	APDErescue	16.7	13.8	4.974	4.45848	-0.515514	0	0.29777	1.3276	-0.153505
00000006_9.tif	control	IV552	APDErescue	16.908	4.422	4.974	7.59552	2.62152	1	0.29777	2.26172	0.78061
00000006_9.tif	control	IV552	APDErescue	16.977	7.981	4.974	4.87022	-0.103779	0	0.29777	1.4502	-0.0309023
00000006_9.tif	control	IV552	APDErescue	17.102	20.207	4.974	9.95921	4.98521	1	0.29777	2.96555	1.48445
00000006_9.tif	control	IV552	APDErescue	17.283	13.773	4.974	4.9152	-0.0587975	0	0.29777	1.4636	-0.0175081
00000006_9.tif	control	IV552	APDErescue	17.318	20.283	4.974	10.1153	5.14131	1	0.29777	3.01203	1.53093
00000006_9.tif	control	IV552	APDErescue	17.477	18.45	4.974	8.55319	3.57919	1	0.29777	2.54688	1.06578
00000006_9.tif	control	IV552	APDErescue	17.839	9.016	4.974	5.07053	0.0965343	1	0.29777	1.50985	0.028745
00000006_9.tif	control	IV552	APDErescue	22.502	7.095	4.974	10.1131	5.13915	1	0.29777	3.01139	1.53029
00000007_2.tif	predator	CB1112	cat2(e1112)	4.505	14.516	5.95823	10.9825	5.02424	1	0.29777	3.27025	1.49607
00000007_2.tif	predator	CB1112	cat2(e1112)	4.677	14.635	5.95823	10.862	4.90378	1	0.29777	3.23438	1.4602
00000007_2.tif	predator	CB1112	cat2(e1112)	11.401	10.443	5.95823	3.46272	-2.49551	0	0.29777	1.03109	-0.743088
00000007_2.tif	predator	CB1112	cat2(e1112)	11.672	10.22	5.95823	3.22677	-2.73146	0	0.29777	0.960835	-0.813346
00000007_2.tif	predator	CB1112	cat2(e1112)	11.964	11.325	5.95823	2.92533	-3.03289	0	0.29777	0.871076	-0.903105
00000007_2.tif	predator	CB1112	cat2(e1112)	12.693	8.8	5.95823	2.94533	-3.0129	0	0.29777	0.87703	-0.897151
00000007_2.tif	predator	CB1112	cat2(e1112)	13.075	8.988	5.95823	2.54093	-3.41729	0	0.29777	0.756613	-1.01757
00000007_2.tif	predator	CB1112	cat2(e1112)	13.443	9.377	5.95823	2.0055	-3.95273	0	0.29777	0.597177	-1.177
00000007_2.tif	predator	CB1112	cat2(e1112)	13.45	15.061	5.95823	4.47183	-1.4864	0	0.29777	1.33158	-0.442605
00000007_2.tif	predator	CB1112	cat2(e1112)	13.582	9.085	5.95823	2.13897	-3.81926	0	0.29777	0.63692	-1.13726
00000007_2.tif	predator	CB1112	cat2(e1112)	13.797	7.648	5.95823	3.33273	-2.62549	0	0.29777	0.992388	-0.781793
00000007_2.tif	predator	CB1112	cat2(e1112)	13.804	12.727	5.95823	2.17918	-3.77905	0	0.29777	0.648894	-1.12529
00000007_2.tif	predator	CB1112	cat2(e1112)	13.95	11.335	5.95823	1.03574	-4.92248	0	0.29777	0.308413	-1.46577
00000007_2.tif	predator	CB1112	cat2(e1112)	14.339	13.2	5.95823	2.44081	-3.51741	0	0.29777	0.726801	-1.04738
00000007_2.tif	predator	CB1112	cat2(e1112)	14.575	12.686	5.95823	1.89321	-4.06502	0	0.29777	0.563741	-1.21044
00000007_2.tif	predator	CB1112	cat2(e1112)	14.894	14.255	5.95823	3.44336	-2.51486	0	0.29777	1.02533	-0.748851
00000007_2.tif	predator	CB1112	cat2(e1112)	14.95	13.464	5.95823	2.65412	-3.30411	0	0.29777	0.790317	-0.983865
00000007_2.tif	predator	CB1112	cat2(e1112)	15.602	9.575	5.95823	1.45077	-4.50746	0	0.29777	0.431996	-1.34219
00000007_2.tif	predator	CB1112	cat2(e1112)	17.054	9.082	5.95823	2.8066	-3.15163	0	0.29777	0.835721	-0.93846
00000007_2.tif	predator	CB1112	cat2(e1112)	18.252	14.359	5.95823	4.91891	-1.03932	0	0.29777	1.4647	-0.309477
00000007_2.tif	predator	CB1112	cat2(e1112)	18.547	11.884	5.95823	3.85505	-2.10318	0	0.29777	1.14792	-0.626264
00000007_2.tif	predator	CB1112	cat2(e1112)	19.696	8.911	5.95823	5.21111	-0.747113	0	0.29777	1.55171	-0.222468
00000007_2.tif	predator	CB1112	cat2(e1112)	20.019	8.498	5.95823	5.66879	-0.289433	0	0.29777	1.688	-0.0861845
00000007_2.tif	predator	CB1112	cat2(e1112)	20.97	10.481	5.95823	6.13494	0.176709	1	0.29777	1.8268	0.0526187
00000007_2.tif	predator	CB1112	cat2(e1112)	22.061	12.505	5.95823	7.41292	1.45469	1	0.29777	2.20734	0.433163
00000007_5.tif	control	IV111	CEPrescue	7.269	10.464	5.53119	6.83506	1.30387	1	0.29777	2.03527	0.388253
00000007_5.tif	control	IV111	CEPrescue	7.365	8.958	5.53119	7.14874	1.61756	1	0.29777	2.12868	0.481659
00000007_5.tif	control	IV111	CEPrescue	7.686	10.116	5.53119	6.49442	0.96323	1	0.29777	1.93384	0.286821
00000007_5.tif	control	IV111	CEPrescue	8.047	8.609	5.53119	6.6684	1.13722	1	0.29777	1.98565	0.338629
00000007_5.tif	control	IV111	CEPrescue	8.116	8.582	5.53119	6.61902	1.08783	1	0.29777	1.97094	0.323923
00000007_5.tif	control	IV111	CEPrescue	8.276	10.839	5.53119	5.78349	0.252304	1	0.29777	1.72215	0.0751287
00000007_5.tif	control	IV111	CEPrescue	8.276	12.589	5.53119	5.81969	0.288501	1	0.29777	1.73293	0.0859071
00000007_5.tif	control	IV111	CEPrescue	8.491	8.915	5.53119	6.13485	0.603664	1	0.29777	1.82677	0.179753
00000007_5.tif	control	IV111	CEPrescue	8.644	11.512	5.53119	5.36663	-0.164561	0	0.29777	1.59802	-0.0490014
00000007_5.tif	control	IV111	CEPrescue	8.7	7.797	5.53119	6.52789	0.996699	1	0.29777	1.94381	0.296787
00000007_5.tif	control	IV111	CEPrescue	8.741	16.293	5.53119	7.05995	1.52877	1	0.29777	2.10224	0.455221
00000007_5.tif	control	IV111	CEPrescue	8.97	12.964	5.53119	5.22288	-0.308305	0	0.29777	1.55522	-0.0918041
00000007_5.tif	control	IV111	CEPrescue	9.241	9.422	5.53119	5.24032	-0.290868	0	0.29777	1.56041	-0.0866119
00000007_5.tif	control	IV111	CEPrescue	9.276	11.234	5.53119	4.74767	-0.783519	0	0.29777	1.41371	-0.233308
00000007_5.tif	control	IV111	CEPrescue	9.29	10.304	5.53119	4.89311	-0.63808	0	0.29777	1.45702	-0.190001
00000007_5.tif	control	IV111	CEPrescue	9.373	12.901	5.53119	4.81768	-0.71351	0	0.29777	1.43456	-0.212462
00000007_5.tif	control	IV111	CEPrescue	9.401	16.161	5.53119	6.48848	0.957292	1	0.29777	1.93207	0.285053
00000007_5.tif	control	IV111	CEPrescue	9.443	16.002	5.53119	6.34728	0.816092	1	0.29777	1.89003	0.243008
00000007_5.tif	control	IV111	CEPrescue	9.477	9.248	5.53119	5.1041	-0.427091	0	0.29777	1.51985	-0.127175
00000007_5.tif	control	IV111	CEPrescue	9.477	9.318	5.53119	5.0723	-0.458884	0	0.29777	1.51038	-0.136642
00000007_5.tif	control	IV111	CEPrescue	9.505	15.918	5.53119	6.24436	0.71317	1	0.29777	1.85938	0.212361
00000007_5.tif	control	IV111	CEPrescue	9.533	15.613	5.53119	6.0163	0.485114	1	0.29777	1.79147	0.144453
00000007_5.tif	control	IV111	CEPrescue	9.568	14.241	5.53119	5.17088	-0.36031	0	0.29777	1.53973	-0.10729
00000007_5.tif	control	IV111	CEPrescue	9.679	17.922	5.53119	7.66819	2.137	1	0.29777	2.28336	0.636335
00000007_5.tif	control	IV111	CEPrescue	9.7	15.661	5.53119	5.92593	0.394738	1	0.29777	1.76456	0.117541
00000007_5.tif	control	IV111	CEPrescue	9.901	9.026	5.53119	4.84546	-0.685725	0	0.29777	1.44283	-0.204188
00000007_5.tif	control	IV111	CEPrescue	9.915	15.321	5.53119	5.53711	0.00591939	1	0.29777	1.64878	0.00176262
00000007_5.tif	control	IV111	CEPrescue	9.943	15.8	5.53119	5.85072	0.319532	1	0.29777	1.74217	0.0951472
00000007_5.tif	control	IV111	CEPrescue	10.304	7.665	5.53119	5.40106	-0.130125	0	0.29777	1.60827	-0.0387473
00000007_5.tif	control	IV111	CEPrescue	10.498	7.498	5.53119	5.39549	-0.135693	0	0.29777	1.60662	-0.0404054
00000007_5.tif	control	IV111	CEPrescue	10.533	15.224	5.53119	5.02657	-0.504615	0	0.29777	1.49676	-0.150259
00000007_5.tif	control	IV111	CEPrescue	10.644	10.568	5.53119	3.5189	-2.01229	0	0.29777	1.04782	-0.5992
00000007_5.tif	control	IV111	CEPrescue	10.651	5.036	5.53119	7.36819	1.837	1	0.29777	2.19403	0.547005
00000007_5.tif	control	IV111	CEPrescue	10.776	10.477	5.53119	3.42147	-2.10972	0	0.29777	1.01881	-0.628211
00000007_5.tif	control	IV111	CEPrescue	10.873	7.134	5.53119	5.45274	-0.078448	0	0.29777	1.62366	-0.0233595
00000007_5.tif	control	IV111	CEPrescue	10.88	12.477	5.53119	3.25217	-2.27902	0	0.29777	0.968398	-0.678624
00000007_5.tif	control	IV111	CEPrescue	10.943	9.95	5.53119	3.47983	-2.05136	0	0.29777	1.03619	-0.610832
00000007_5.tif	control	IV111	CEPrescue	11.033	11.405	5.53119	2.98299	-2.54819	0	0.29777	0.888246	-0.758776
00000007_5.tif	control	IV111	CEPrescue	11.047	14.616	5.53119	4.23224	-1.29895	0	0.29777	1.26023	-0.386788
00000007_5.tif	control	IV111	CEPrescue	11.172	18.415	5.53119	7.38785	1.85666	1	0.29777	2.19988	0.552858
00000007_5.tif	control	IV111	CEPrescue	11.2	9.96	5.53119	3.25055	-2.28064	0	0.29777	0.967915	-0.679106
00000007_5.tif	control	IV111	CEPrescue	11.227	18.616	5.53119	7.55338	2.02219	1	0.29777	2.24917	0.602149
00000007_5.tif	control	IV111	CEPrescue	11.325	9.46	5.53119	3.42975	-2.10144	0	0.29777	1.02128	-0.625745
00000007_5.tif	control	IV111	CEPrescue	11.345	10.03	5.53119	3.09004	-2.44115	0	0.29777	0.92012	-0.726902
00000007_5.tif	control	IV111	CEPrescue	11.936	6.179	5.53119	5.79859	0.267407	1	0.29777	1.72665	0.0796258
00000007_5.tif	control	IV111	CEPrescue	11.936	6.089	5.53119	5.88273	0.351541	1	0.29777	1.7517	0.104678
00000007_5.tif	control	IV111	CEPrescue	12.151	17.033	5.53119	5.74792	0.216734	1	0.29777	1.71156	0.0645369
00000007_5.tif	control	IV111	CEPrescue	12.2	17.616	5.53119	6.28813	0.756943	1	0.29777	1.87242	0.225395
00000007_5.tif	control	IV111	CEPrescue	12.408	7.075	5.53119	4.79456	-0.736632	0	0.29777	1.42767	-0.219347
00000007_5.tif	control	IV111	CEPrescue	12.415	17.769	5.53119	6.37767	0.84648	1	0.29777	1.89908	0.252056
00000007_5.tif	control	IV111	CEPrescue	12.422	8.998	5.53119	3.04318	-2.48801	0	0.29777	0.906168	-0.740853
00000007_5.tif	control	IV111	CEPrescue	12.602	17.839	5.53119	6.40176	0.870569	1	0.29777	1.90625	0.259229
00000007_5.tif	control	IV111	CEPrescue	12.602	8.964	5.53119	2.98318	-2.54801	0	0.29777	0.888302	-0.75872
00000007_5.tif	control	IV111	CEPrescue	12.679	5.998	5.53119	5.75211	0.220923	1	0.29777	1.71281	0.0657843
00000007_5.tif	control	IV111	CEPrescue	12.741	17.394	5.53119	5.9372	0.406014	1	0.29777	1.76792	0.120899
00000007_5.tif	control	IV111	CEPrescue	12.894	7.234	5.53119	4.50056	-1.03063	0	0.29777	1.34013	-0.306889
00000007_5.tif	control	IV111	CEPrescue	12.929	14.7	5.53119	3.28874	-2.24245	0	0.29777	0.979287	-0.667734
00000007_5.tif	control	IV111	CEPrescue	12.936	7.116	5.53119	4.60499	-0.926195	0	0.29777	1.37123	-0.275793
00000007_5.tif	control	IV111	CEPrescue	12.95	15.477	5.53119	4.02508	-1.50611	0	0.29777	1.19855	-0.448473
00000007_5.tif	control	IV111	CEPrescue	13.005	7.172	5.53119	4.53477	-0.996421	0	0.29777	1.35032	-0.296704
00000007_5.tif	control	IV111	CEPrescue	13.019	15.477	5.53119	4.00746	-1.52372	0	0.29777	1.1933	-0.453719
00000007_5.tif	control	IV111	CEPrescue	13.359	15.38	5.53119	3.84156	-1.68963	0	0.29777	1.1439	-0.50312
00000007_5.tif	control	IV111	CEPrescue	13.373	14.651	5.53119	3.12266	-2.40853	0	0.29777	0.929835	-0.717187
00000007_5.tif	control	IV111	CEPrescue	13.616	6.686	5.53119	4.92379	-0.607398	0	0.29777	1.46616	-0.180865
00000007_5.tif	control	IV111	CEPrescue	13.769	17.415	5.53119	5.82599	0.294799	1	0.29777	1.7348	0.0877823
00000007_5.tif	control	IV111	CEPrescue	13.991	6.88	5.53119	4.71404	-0.817149	0	0.29777	1.4037	-0.243323
00000007_5.tif	control	IV111	CEPrescue	14.255	17.276	5.53119	5.68728	0.156092	1	0.29777	1.6935	0.0464795
00000007_5.tif	control	IV111	CEPrescue	14.792	18.245	5.53119	6.69681	1.16563	1	0.29777	1.99411	0.347089
00000007_5.tif	control	IV111	CEPrescue	14.807	17.651	5.53119	6.10921	0.578023	1	0.29777	1.81914	0.172118
00000007_5.tif	control	IV111	CEPrescue	14.979	7.359	5.53119	4.34444	-1.18674	0	0.29777	1.29364	-0.353377
00000007_5.tif	control	IV111	CEPrescue	15.094	7.344	5.53119	4.38606	-1.14512	0	0.29777	1.30604	-0.340984
00000007_5.tif	control	IV111	CEPrescue	15.245	6.026	5.53119	5.70332	0.172132	1	0.29777	1.69828	0.0512556
00000007_5.tif	control	IV111	CEPrescue	15.984	15.849	5.53119	4.6906	-0.840591	0	0.29777	1.39672	-0.250303
00000007_5.tif	control	IV111	CEPrescue	16.13	19.24	5.53119	7.93446	2.40328	1	0.29777	2.36265	0.715624
00000007_5.tif	control	IV111	CEPrescue	16.37	7.24	5.53119	4.95247	-0.578722	0	0.29777	1.4747	-0.172326
00000007_5.tif	control	IV111	CEPrescue	16.641	17.88	5.53119	6.81439	1.28321	1	0.29777	2.02912	0.3821
00000007_5.tif	control	IV111	CEPrescue	16.661	6.906	5.53119	5.38564	-0.145545	0	0.29777	1.60368	-0.043339
00000007_5.tif	control	IV111	CEPrescue	16.714	17.948	5.53119	6.90543	1.37424	1	0.29777	2.05623	0.409207
00000007_5.tif	control	IV111	CEPrescue	17.01	16.25	5.53119	5.5388	0.00761515	1	0.29777	1.64929	0.00226756
00000007_5.tif	control	IV111	CEPrescue	17.026	16.073	5.53119	5.39979	-0.131401	0	0.29777	1.60789	-0.0391272
00000007_5.tif	control	IV111	CEPrescue	17.12	13.667	5.53119	3.73757	-1.79362	0	0.29777	1.11294	-0.534086
00000007_5.tif	control	IV111	CEPrescue	17.151	7.266	5.53119	5.34766	-0.183528	0	0.29777	1.59237	-0.0546491
00000007_5.tif	control	IV111	CEPrescue	17.193	7.422	5.53119	5.24758	-0.28361	0	0.29777	1.56257	-0.0844505
00000007_5.tif	control	IV111	CEPrescue	17.276	7.302	5.53119	5.39333	-0.137857	0	0.29777	1.60597	-0.0410495
00000007_5.tif	control	IV111	CEPrescue	17.391	19.484	5.53119	8.5839	3.05271	1	0.29777	2.55603	0.909005
00000007_5.tif	control	IV111	CEPrescue	17.505	12.172	5.53119	3.54247	-1.98872	0	0.29777	1.05484	-0.59218
00000007_5.tif	control	IV111	CEPrescue	17.526	18.781	5.53119	8.00095	2.46976	1	0.29777	2.38244	0.735422
00000007_5.tif	control	IV111	CEPrescue	17.583	14.135	5.53119	4.38441	-1.14678	0	0.29777	1.30554	-0.341477
00000007_5.tif	control	IV111	CEPrescue	17.594	18.422	5.53119	7.71146	2.18027	1	0.29777	2.29624	0.64922
00000007_5.tif	control	IV111	CEPrescue	17.74	16.745	5.53119	6.35969	0.828506	1	0.29777	1.89373	0.246704
00000007_5.tif	control	IV111	CEPrescue	17.865	10.917	5.53119	3.91399	-1.61719	0	0.29777	1.16547	-0.481552
00000007_5.tif	control	IV111	CEPrescue	17.901	14.229	5.53119	4.69927	-0.831921	0	0.29777	1.3993	-0.247721
00000007_5.tif	control	IV111	CEPrescue	17.911	13.953	5.53119	4.5588	-0.972385	0	0.29777	1.35747	-0.289547
00000007_5.tif	control	IV111	CEPrescue	18.047	16.125	5.53119	6.06855	0.537365	1	0.29777	1.80703	0.160011
00000007_5.tif	control	IV111	CEPrescue	18.141	9.099	5.53119	4.82599	-0.705197	0	0.29777	1.43704	-0.209986
00000007_5.tif	control	IV111	CEPrescue	18.156	12.37	5.53119	4.218	-1.31319	0	0.29777	1.25599	-0.391029
00000007_5.tif	control	IV111	CEPrescue	18.161	16.089	5.53119	6.11848	0.587295	1	0.29777	1.8219	0.174879
00000007_5.tif	control	IV111	CEPrescue	18.219	16.255	5.53119	6.28018	0.748988	1	0.29777	1.87005	0.223026
00000007_5.tif	control	IV111	CEPrescue	18.307	12.536	5.53119	4.39904	-1.13215	0	0.29777	1.3099	-0.337119
00000007_5.tif	control	IV111	CEPrescue	18.354	15.745	5.53119	6.00842	0.477235	1	0.29777	1.78913	0.142106
00000007_5.tif	control	IV111	CEPrescue	18.38	9.724	5.53119	4.75329	-0.777894	0	0.29777	1.41539	-0.231634
00000007_5.tif	control	IV111	CEPrescue	18.453	16.573	5.53119	6.67313	1.14194	1	0.29777	1.98706	0.340037
00000007_5.tif	control	IV111	CEPrescue	18.521	16.786	5.53119	6.87793	1.34675	1	0.29777	2.04804	0.401021
00000007_5.tif	control	IV111	CEPrescue	19.031	10.026	5.53119	5.26014	-0.271048	0	0.29777	1.56631	-0.0807101
00000007_5.tif	control	IV111	CEPrescue	19.26	15.271	5.53119	6.40959	0.878401	1	0.29777	1.90858	0.261562
00000007_5.tif	control	IV111	CEPrescue	19.427	9.323	5.53119	5.87378	0.342596	1	0.29777	1.74904	0.102015
00000007_5.tif	control	IV111	CEPrescue	19.766	11.354	5.53119	5.761	0.229814	1	0.29777	1.71545	0.0684316
00000007_5.tif	control	IV111	CEPrescue	20.042	9.271	5.53119	6.46385	0.932662	1	0.29777	1.92474	0.277719
00000007_5.tif	control	IV111	CEPrescue	20.125	9.224	5.53119	6.55821	1.02702	1	0.29777	1.95284	0.305817
00000007_5.tif	control	IV111	CEPrescue	20.283	9.113	5.53119	6.74581	1.21462	1	0.29777	2.0087	0.361677
00000007_6.tif	control	IV111	CEPrescue	4.366	13.859	4.66674	9.93347	5.26673	1	0.29777	2.95789	1.56827
00000007_6.tif	control	IV111	CEPrescue	5.207	7.78	4.66674	9.71426	5.04752	1	0.29777	2.89262	1.503
00000007_6.tif	control	IV111	CEPrescue	5.297	11.651	4.66674	8.77656	4.10982	1	0.29777	2.6134	1.22378
00000007_6.tif	control	IV111	CEPrescue	5.408	11.63	4.66674	8.66583	3.99909	1	0.29777	2.58042	1.19081
00000007_6.tif	control	IV111	CEPrescue	5.658	8.245	4.66674	9.11577	4.44903	1	0.29777	2.7144	1.32479
00000007_6.tif	control	IV111	CEPrescue	6.172	17.894	4.66674	10.0087	5.34198	1	0.29777	2.9803	1.59068
00000007_6.tif	control	IV111	CEPrescue	6.248	8.03	4.66674	8.66424	3.9975	1	0.29777	2.57995	1.19034
00000007_6.tif	control	IV111	CEPrescue	6.262	5.259	4.66674	10.156	5.48928	1	0.29777	3.02416	1.63454
00000007_6.tif	control	IV111	CEPrescue	6.276	10.307	4.66674	7.9294	3.26267	1	0.29777	2.36114	0.971524
00000007_6.tif	control	IV111	CEPrescue	6.302	18.083	4.66674	10.0247	5.358	1	0.29777	2.98507	1.59545
00000007_6.tif	control	IV111	CEPrescue	6.339	8.196	4.66674	8.5115	3.84476	1	0.29777	2.53447	1.14486
00000007_6.tif	control	IV111	CEPrescue	6.429	10.252	4.66674	7.7894	3.12266	1	0.29777	2.31945	0.929835
00000007_6.tif	control	IV111	CEPrescue	6.575	11.533	4.66674	7.50114	2.8344	1	0.29777	2.23361	0.844
00000007_6.tif	control	IV111	CEPrescue	6.651	13.658	4.66674	7.66332	2.99659	1	0.29777	2.28191	0.892294
00000007_6.tif	control	IV111	CEPrescue	6.832	3.717	4.66674	10.8149	6.14812	1	0.29777	3.22034	1.83073
00000007_6.tif	control	IV111	CEPrescue	6.845	18.311	4.66674	9.7617	5.09496	1	0.29777	2.90674	1.51713
00000007_6.tif	control	IV111	CEPrescue	6.866	17.929	4.66674	9.4932	4.82646	1	0.29777	2.82679	1.43718
00000007_6.tif	control	IV111	CEPrescue	6.873	12.484	4.66674	7.23732	2.57058	1	0.29777	2.15506	0.765441
00000007_6.tif	control	IV111	CEPrescue	6.887	5.974	4.66674	9.21959	4.55285	1	0.29777	2.74532	1.3557
00000007_6.tif	control	IV111	CEPrescue	6.998	9.488	4.66674	7.4278	2.76107	1	0.29777	2.21178	0.822163
00000007_6.tif	control	IV111	CEPrescue	7.019	9.078	4.66674	7.54311	2.87637	1	0.29777	2.24611	0.856497
00000007_6.tif	control	IV111	CEPrescue	7.026	17.97	4.66674	9.39939	4.73266	1	0.29777	2.79886	1.40924
00000007_6.tif	control	IV111	CEPrescue	7.075	5.717	4.66674	9.23954	4.5728	1	0.29777	2.75126	1.36164
00000007_6.tif	control	IV111	CEPrescue	7.102	9.773	4.66674	7.24592	2.57918	1	0.29777	2.15762	0.768003
00000007_6.tif	control	IV111	CEPrescue	7.137	9.557	4.66674	7.27443	2.60769	1	0.29777	2.16611	0.776493
00000007_6.tif	control	IV111	CEPrescue	7.144	9.648	4.66674	7.24082	2.57408	1	0.29777	2.1561	0.766484
00000007_6.tif	control	IV111	CEPrescue	7.144	9.036	4.66674	7.44156	2.77482	1	0.29777	2.21587	0.826259
00000007_6.tif	control	IV111	CEPrescue	7.165	11.047	4.66674	6.94368	2.27694	1	0.29777	2.06762	0.678005
00000007_6.tif	control	IV111	CEPrescue	7.262	5.078	4.66674	9.53443	4.86769	1	0.29777	2.83907	1.44945
00000007_6.tif	control	IV111	CEPrescue	7.477	9.46	4.66674	6.98221	2.31548	1	0.29777	2.07909	0.689479
00000007_6.tif	control	IV111	CEPrescue	7.477	3.53	4.66674	10.5392	5.8725	1	0.29777	3.13827	1.74866
00000007_6.tif	control	IV111	CEPrescue	7.526	9.55	4.66674	6.90675	2.24001	1	0.29777	2.05662	0.667009
00000007_6.tif	control	IV111	CEPrescue	7.533	12.172	4.66674	6.5536	1.88686	1	0.29777	1.95147	0.561851
00000007_6.tif	control	IV111	CEPrescue	7.589	4.175	4.66674	9.9711	5.30436	1	0.29777	2.9691	1.57948
00000007_6.tif	control	IV111	CEPrescue	7.748	3.53	4.66674	10.3718	5.70505	1	0.29777	3.08841	1.69879
00000007_6.tif	control	IV111	CEPrescue	7.811	12.2	4.66674	6.27815	1.61141	1	0.29777	1.86944	0.47983
00000007_6.tif	control	IV111	CEPrescue	8.012	9.314	4.66674	6.53221	1.86548	1	0.29777	1.9451	0.555483
00000007_6.tif	control	IV111	CEPrescue	8.214	17.852	4.66674	8.45945	3.79271	1	0.29777	2.51897	1.12936
00000007_6.tif	control	IV111	CEPrescue	8.415	15.835	4.66674	6.97855	2.31181	1	0.29777	2.078	0.688389
00000007_6.tif	control	IV111	CEPrescue	8.443	9.62	4.66674	6.01945	1.35271	1	0.29777	1.79241	0.402798
00000007_6.tif	control	IV111	CEPrescue	8.484	16.21	4.66674	7.15042	2.48368	1	0.29777	2.12918	0.739566
00000007_6.tif	control	IV111	CEPrescue	8.561	7.995	4.66674	6.6695	2.00276	1	0.29777	1.98598	0.596361
00000007_6.tif	control	IV111	CEPrescue	8.8	13.901	4.66674	5.69485	1.02811	1	0.29777	1.69576	0.306141
00000007_6.tif	control	IV111	CEPrescue	8.842	20.227	4.66674	9.96107	5.29433	1	0.29777	2.96611	1.57649
00000007_6.tif	control	IV111	CEPrescue	8.932	7.182	4.66674	6.87725	2.21051	1	0.29777	2.04784	0.658223
00000007_6.tif	control	IV111	CEPrescue	9.002	6.231	4.66674	7.49496	2.82822	1	0.29777	2.23177	0.842159
00000007_6.tif	control	IV111	CEPrescue	9.113	7.37	4.66674	6.6171	1.95036	1	0.29777	1.97037	0.580759
00000007_6.tif	control	IV111	CEPrescue	9.495	13.686	4.66674	4.97053	0.303793	1	0.29777	1.48008	0.0904605
00000007_6.tif	control	IV111	CEPrescue	9.592	5.168	4.66674	7.96254	3.2958	1	0.29777	2.37101	0.981392
00000007_6.tif	control	IV111	CEPrescue	9.689	13.589	4.66674	4.75409	0.0873525	1	0.29777	1.41563	0.026011
00000007_6.tif	control	IV111	CEPrescue	9.786	5.502	4.66674	7.57733	2.91059	1	0.29777	2.2563	0.866686
00000007_6.tif	control	IV111	CEPrescue	9.925	17.575	4.66674	7.15098	2.48424	1	0.29777	2.12935	0.739733
00000007_6.tif	control	IV111	CEPrescue	10.071	17.734	4.66674	7.19891	2.53217	1	0.29777	2.14362	0.754004
00000007_6.tif	control	IV111	CEPrescue	10.189	2.224	4.66674	10.2874	5.62064	1	0.29777	3.06327	1.67366
00000007_6.tif	control	IV111	CEPrescue	10.432	19.491	4.66674	8.55453	3.88779	1	0.29777	2.54728	1.15767
00000007_6.tif	control	IV111	CEPrescue	10.523	12.557	4.66674	3.64057	-1.02617	0	0.29777	1.08405	-0.305562
00000007_6.tif	control	IV111	CEPrescue	10.543	17.693	4.66674	6.91232	2.24558	1	0.29777	2.05828	0.668667
00000007_6.tif	control	IV111	CEPrescue	10.571	11.28	4.66674	3.5334	-1.13334	0	0.29777	1.05214	-0.337475
00000007_6.tif	control	IV111	CEPrescue	10.599	11.911	4.66674	3.47773	-1.18901	0	0.29777	1.03556	-0.354051
00000007_6.tif	control	IV111	CEPrescue	10.641	3.731	4.66674	8.72256	4.05582	1	0.29777	2.59732	1.2077
00000007_6.tif	control	IV111	CEPrescue	10.918	9.411	4.66674	3.92746	-0.739278	0	0.29777	1.16948	-0.220135
00000007_6.tif	control	IV111	CEPrescue	11.092	5.175	4.66674	7.21921	2.55247	1	0.29777	2.14966	0.760049
00000007_6.tif	control	IV111	CEPrescue	11.099	5.078	4.66674	7.30481	2.63807	1	0.29777	2.17515	0.785539
00000007_6.tif	control	IV111	CEPrescue	11.189	19.519	4.66674	8.28703	3.62029	1	0.29777	2.46763	1.07801
00000007_6.tif	control	IV111	CEPrescue	11.203	4.168	4.66674	8.10701	3.44027	1	0.29777	2.41402	1.02441
00000007_6.tif	control	IV111	CEPrescue	11.21	20.72	4.66674	9.41582	4.74908	1	0.29777	2.80375	1.41413
00000007_6.tif	control	IV111	CEPrescue	11.28	19.554	4.66674	8.28874	3.62201	1	0.29777	2.46814	1.07852
00000007_6.tif	control	IV111	CEPrescue	11.439	5.224	4.66674	7.03752	2.37078	1	0.29777	2.09556	0.705947
00000007_6.tif	control	IV111	CEPrescue	11.53	5.168	4.66674	7.05617	2.38943	1	0.29777	2.10112	0.711502
00000007_6.tif	control	IV111	CEPrescue	11.53	6.217	4.66674	6.08941	1.42267	1	0.29777	1.81324	0.42363
00000007_6.tif	control	IV111	CEPrescue	11.655	6.238	4.66674	6.01904	1.3523	1	0.29777	1.79229	0.402676
00000007_6.tif	control	IV111	CEPrescue	11.8	2.009	4.66674	10.0027	5.33594	1	0.29777	2.9785	1.58888
00000007_6.tif	control	IV111	CEPrescue	11.821	9.655	4.66674	3.0758	-1.59094	0	0.29777	0.91588	-0.473734
00000007_6.tif	control	IV111	CEPrescue	11.835	9.738	4.66674	3.00945	-1.65729	0	0.29777	0.896124	-0.493491
00000007_6.tif	control	IV111	CEPrescue	12.016	14.089	4.66674	3.11483	-1.55191	0	0.29777	0.927503	-0.462111
00000007_6.tif	control	IV111	CEPrescue	12.182	14.29	4.66674	3.16662	-1.50012	0	0.29777	0.942924	-0.44669
00000007_6.tif	control	IV111	CEPrescue	12.224	2.682	4.66674	9.25459	4.58785	1	0.29777	2.75574	1.36612
00000007_6.tif	control	IV111	CEPrescue	12.516	8.939	4.66674	3.2134	-1.45333	0	0.29777	0.956856	-0.432759
00000007_6.tif	control	IV111	CEPrescue	12.536	11.835	4.66674	1.53935	-3.12739	0	0.29777	0.458372	-0.931243
00000007_6.tif	control	IV111	CEPrescue	12.599	13.936	4.66674	2.63653	-2.03021	0	0.29777	0.785078	-0.604536
00000007_6.tif	control	IV111	CEPrescue	12.62	11.905	4.66674	1.46124	-3.20549	0	0.29777	0.435115	-0.9545
00000007_6.tif	control	IV111	CEPrescue	12.724	9.314	4.66674	2.78458	-1.88216	0	0.29777	0.829165	-0.56045
00000007_6.tif	control	IV111	CEPrescue	12.856	9.127	4.66674	2.89158	-1.77516	0	0.29777	0.861025	-0.52859
00000007_6.tif	control	IV111	CEPrescue	12.856	10.453	4.66674	1.77857	-2.88817	0	0.29777	0.529604	-0.860011
00000007_6.tif	control	IV111	CEPrescue	12.884	4.696	4.66674	7.15351	2.48677	1	0.29777	2.1301	0.740485
00000007_6.tif	control	IV111	CEPrescue	13.349	20.7	4.66674	8.97924	4.3125	1	0.29777	2.67375	1.28413
00000007_6.tif	control	IV111	CEPrescue	13.398	4.092	4.66674	7.68769	3.02095	1	0.29777	2.28916	0.899549
00000007_6.tif	control	IV111	CEPrescue	13.453	12.606	4.66674	1.05695	-3.60979	0	0.29777	0.314727	-1.07489
00000007_6.tif	control	IV111	CEPrescue	13.467	12.821	4.66674	1.23056	-3.43618	0	0.29777	0.366424	-1.02319
00000007_6.tif	control	IV111	CEPrescue	13.557	12.328	4.66674	0.774816	-3.89192	0	0.29777	0.230717	-1.1589
00000007_6.tif	control	IV111	CEPrescue	13.571	6.196	4.66674	5.57664	0.909903	1	0.29777	1.66056	0.270942
00000007_6.tif	control	IV111	CEPrescue	13.627	21.658	4.66674	9.91803	5.2513	1	0.29777	2.95329	1.56368
00000007_6.tif	control	IV111	CEPrescue	13.911	7.481	4.66674	4.27207	-0.394665	0	0.29777	1.2721	-0.11752
00000007_6.tif	control	IV111	CEPrescue	13.918	7.592	4.66674	4.16089	-0.50585	0	0.29777	1.23899	-0.150627
00000007_6.tif	control	IV111	CEPrescue	14.023	7.807	4.66674	3.94332	-0.723421	0	0.29777	1.1742	-0.215413
00000007_6.tif	control	IV111	CEPrescue	14.214	15.571	4.66674	3.8236	-0.843137	0	0.29777	1.13855	-0.251061
00000007_6.tif	control	IV111	CEPrescue	14.227	7.915	4.66674	3.83809	-0.828647	0	0.29777	1.14287	-0.246746
00000007_6.tif	control	IV111	CEPrescue	14.262	15.71	4.66674	3.96451	-0.70223	0	0.29777	1.18051	-0.209103
00000007_6.tif	control	IV111	CEPrescue	14.533	10.377	4.66674	1.44801	-3.21873	0	0.29777	0.431174	-0.958441
00000007_6.tif	control	IV111	CEPrescue	14.575	16.981	4.66674	5.25503	0.588294	1	0.29777	1.56479	0.175176
00000007_6.tif	control	IV111	CEPrescue	14.575	16.536	4.66674	4.81226	0.145517	1	0.29777	1.43295	0.0433306
00000007_6.tif	control	IV111	CEPrescue	14.609	15.752	4.66674	4.03773	-0.629004	0	0.29777	1.20232	-0.187298
00000007_6.tif	control	IV111	CEPrescue	14.707	17.845	4.66674	6.12789	1.46115	1	0.29777	1.8247	0.435086
00000007_6.tif	control	IV111	CEPrescue	14.755	8.651	4.66674	3.17316	-1.49358	0	0.29777	0.944871	-0.444744
00000007_6.tif	control	IV111	CEPrescue	14.804	8.054	4.66674	3.7676	-0.899142	0	0.29777	1.12188	-0.267738
00000007_6.tif	control	IV111	CEPrescue	14.832	18.318	4.66674	6.61171	1.94497	1	0.29777	1.96877	0.579154
00000007_6.tif	control	IV111	CEPrescue	14.915	8.457	4.66674	3.39894	-1.2678	0	0.29777	1.0121	-0.377511
00000007_6.tif	control	IV111	CEPrescue	14.964	8.651	4.66674	3.22454	-1.44219	0	0.29777	0.960172	-0.429442
00000007_6.tif	control	IV111	CEPrescue	14.991	18.137	4.66674	6.45263	1.7859	1	0.29777	1.9214	0.531786
00000007_6.tif	control	IV111	CEPrescue	15.123	8.269	4.66674	3.63591	-1.03083	0	0.29777	1.08267	-0.306949
00000007_6.tif	control	IV111	CEPrescue	15.484	8.797	4.66674	3.27279	-1.39395	0	0.29777	0.974538	-0.415077
00000007_6.tif	control	IV111	CEPrescue	15.512	7.123	4.66674	4.8456	0.178863	1	0.29777	1.44287	0.05326
00000007_6.tif	control	IV111	CEPrescue	15.554	12.068	4.66674	1.51476	-3.15198	0	0.29777	0.451049	-0.938566
00000007_6.tif	control	IV111	CEPrescue	15.776	12.727	4.66674	1.96335	-2.70339	0	0.29777	0.584626	-0.804988
00000007_6.tif	control	IV111	CEPrescue	16.151	7.755	4.66674	4.50312	-0.163616	0	0.29777	1.34089	-0.0487199
00000007_6.tif	control	IV111	CEPrescue	16.47	13.359	4.66674	2.88695	-1.77979	0	0.29777	0.859648	-0.529967
00000007_6.tif	control	IV111	CEPrescue	16.602	14.391	4.66674	3.6566	-1.01014	0	0.29777	1.08883	-0.300789
00000007_6.tif	control	IV111	CEPrescue	16.623	4.859	4.66674	7.34768	2.68094	1	0.29777	2.18792	0.798304
00000007_6.tif	control	IV111	CEPrescue	16.63	10.321	4.66674	2.92921	-1.73752	0	0.29777	0.872232	-0.517383
00000007_6.tif	control	IV111	CEPrescue	17.207	18.63	4.66674	7.56018	2.89344	1	0.29777	2.2512	0.861581
00000007_6.tif	control	IV111	CEPrescue	17.665	5.283	4.66674	7.3976	2.73087	1	0.29777	2.20278	0.81317
00000007_6.tif	control	IV111	CEPrescue	17.672	5.901	4.66674	6.86758	2.20084	1	0.29777	2.04496	0.655344
00000007_6.tif	control	IV111	CEPrescue	18.116	8.96	4.66674	4.91222	0.245486	1	0.29777	1.46271	0.0730985
00000007_6.tif	control	IV111	CEPrescue	18.255	7.453	4.66674	5.99611	1.32937	1	0.29777	1.78546	0.395847
00000007_6.tif	control	IV111	CEPrescue	18.359	5.269	4.66674	7.77002	3.10328	1	0.29777	2.31368	0.924063
00000007_6.tif	control	IV111	CEPrescue	18.366	5.179	4.66674	7.84907	3.18233	1	0.29777	2.33722	0.947603
00000007_6.tif	control	IV111	CEPrescue	18.498	5.158	4.66674	7.93946	3.27273	1	0.29777	2.36413	0.97452
00000007_6.tif	control	IV111	CEPrescue	18.665	3.429	4.66674	9.50397	4.83724	1	0.29777	2.83	1.44038
00000007_6.tif	control	IV111	CEPrescue	18.804	3.554	4.66674	9.46344	4.79671	1	0.29777	2.81793	1.42832
00000007_6.tif	control	IV111	CEPrescue	18.964	17.3	4.66674	7.39759	2.73085	1	0.29777	2.20278	0.813167
00000007_6.tif	control	IV111	CEPrescue	19.054	17.446	4.66674	7.56669	2.89995	1	0.29777	2.25313	0.863518
00000007_6.tif	control	IV111	CEPrescue	19.484	5.457	4.66674	8.29944	3.63271	1	0.29777	2.47133	1.08171
00000007_6.tif	control	IV111	CEPrescue	19.505	5.387	4.66674	8.36627	3.69953	1	0.29777	2.49122	1.10161
00000007_6.tif	control	IV111	CEPrescue	19.512	8.46	4.66674	6.35664	1.6899	1	0.29777	1.89282	0.503201
00000007_6.tif	control	IV111	CEPrescue	19.665	5.387	4.66674	8.47102	3.80429	1	0.29777	2.52242	1.1328
00000007_6.tif	control	IV111	CEPrescue	19.727	4.845	4.66674	8.9245	4.25776	1	0.29777	2.65745	1.26783
00000007_6.tif	control	IV111	CEPrescue	19.776	19.293	4.66674	9.45627	4.78953	1	0.29777	2.81579	1.42618
00000007_6.tif	control	IV111	CEPrescue	19.998	4.477	4.66674	9.38095	4.71421	1	0.29777	2.79336	1.40375
00000007_6.tif	control	IV111	CEPrescue	20.054	7.578	4.66674	7.29232	2.62558	1	0.29777	2.17143	0.78182
00000007_6.tif	control	IV111	CEPrescue	20.075	12.203	4.66674	6.01907	1.35233	1	0.29777	1.7923	0.402684
00000007_6.tif	control	IV111	CEPrescue	20.089	5.109	4.66674	8.96076	4.29402	1	0.29777	2.66824	1.27863
00000007_6.tif	control	IV111	CEPrescue	20.415	6.13	4.66674	8.4738	3.80707	1	0.29777	2.52324	1.13363
00000007_6.tif	control	IV111	CEPrescue	20.658	7.752	4.66674	7.70365	3.03691	1	0.29777	2.29392	0.904301
00000007_6.tif	control	IV111	CEPrescue	20.714	7.05	4.66674	8.1359	3.46916	1	0.29777	2.42263	1.03301
00000007_6.tif	control	IV111	CEPrescue	20.714	12.134	4.66674	6.65209	1.98535	1	0.29777	1.98079	0.591179
00000007_6.tif	control	IV111	CEPrescue	20.734	6.953	4.66674	8.20854	3.5418	1	0.29777	2.44426	1.05464
00000007_6.tif	control	IV111	CEPrescue	20.748	13.661	4.66674	6.94317	2.27643	1	0.29777	2.06747	0.677852
00000007_6.tif	control	IV111	CEPrescue	20.783	7.286	4.66674	8.05924	3.3925	1	0.29777	2.3998	1.01019
00000007_6.tif	control	IV111	CEPrescue	20.984	9.238	4.66674	7.35337	2.68663	1	0.29777	2.18961	0.799999
00000007_6.tif	control	IV111	CEPrescue	21.748	9.238	4.66674	8.07563	3.40889	1	0.29777	2.40468	1.01507
00000007_6.tif	control	IV111	CEPrescue	21.998	9.071	4.66674	8.36556	3.69883	1	0.29777	2.49101	1.1014
00000007_6.tif	control	IV111	CEPrescue	22.047	12.495	4.66674	8.00873	3.34199	1	0.29777	2.38476	0.995144
00000007_6.tif	control	IV111	CEPrescue	22.095	9.106	4.66674	8.44649	3.77975	1	0.29777	2.51511	1.1255
00000007_6.tif	control	IV111	CEPrescue	22.179	9.231	4.66674	8.48838	3.82164	1	0.29777	2.52758	1.13797
00000007_6.tif	control	IV111	CEPrescue	22.436	11.946	4.66674	8.3653	3.69856	1	0.29777	2.49093	1.10132
00000007_6.tif	control	IV111	CEPrescue	22.63	11.814	4.66674	8.55724	3.8905	1	0.29777	2.54809	1.15847
00000007_6.tif	control	IV111	CEPrescue	22.922	12.075	4.66674	8.85497	4.18823	1	0.29777	2.63674	1.24713
00000008_1.tif	control	CB1112	cat2(e1112)	11.818	8.344	4.73449	3.64356	-1.09093	0	0.29777	1.08494	-0.324845
00000008_1.tif	control	CB1112	cat2(e1112)	12.135	8.057	4.73449	3.59848	-1.13601	0	0.29777	1.07152	-0.338269
00000008_1.tif	control	CB1112	cat2(e1112)	12.167	11.042	4.73449	2.54215	-2.19234	0	0.29777	0.756975	-0.652813
00000008_1.tif	control	CB1112	cat2(e1112)	12.854	8.052	4.73449	3.13742	-1.59707	0	0.29777	0.934228	-0.475561
00000008_1.tif	control	CB1112	cat2(e1112)	13.25	8.995	4.73449	2.15106	-2.58342	0	0.29777	0.640523	-0.769266
00000008_1.tif	control	CB1112	cat2(e1112)	13.307	8.911	4.73449	2.17863	-2.55586	0	0.29777	0.648731	-0.761058
00000008_1.tif	control	CB1112	cat2(e1112)	13.328	13.99	4.73449	3.63834	-1.09615	0	0.29777	1.08339	-0.326401
00000008_1.tif	control	CB1112	cat2(e1112)	13.51	12.047	4.73449	1.84881	-2.88568	0	0.29777	0.550519	-0.859269
00000008_1.tif	control	CB1112	cat2(e1112)	13.667	11.51	4.73449	1.34975	-3.38474	0	0.29777	0.401915	-1.00787
00000008_1.tif	control	CB1112	cat2(e1112)	13.807	12.156	4.73449	1.77241	-2.96208	0	0.29777	0.52777	-0.882018
00000008_1.tif	control	CB1112	cat2(e1112)	13.953	11.885	4.73449	1.46463	-3.26986	0	0.29777	0.436122	-0.973666
00000008_1.tif	control	CB1112	cat2(e1112)	14.016	10.224	4.73449	0.760632	-3.97386	0	0.29777	0.226493	-1.1833
00000008_1.tif	control	CB1112	cat2(e1112)	14.12	12.016	4.73449	1.51141	-3.22308	0	0.29777	0.450052	-0.959737
00000008_1.tif	control	CB1112	cat2(e1112)	14.182	7.562	4.73449	3.08615	-1.64834	0	0.29777	0.918962	-0.490826
00000008_1.tif	control	CB1112	cat2(e1112)	14.245	8.786	4.73449	1.87234	-2.86215	0	0.29777	0.557527	-0.852262
00000008_1.tif	control	CB1112	cat2(e1112)	14.542	10.547	4.73449	0.144028	-4.59046	0	0.29777	0.0428872	-1.3669
00000008_1.tif	control	CB1112	cat2(e1112)	14.635	7.812	4.73449	2.79724	-1.93724	0	0.29777	0.832936	-0.576853
00000008_1.tif	control	CB1112	cat2(e1112)	14.688	7.896	4.73449	2.71305	-2.02144	0	0.29777	0.807864	-0.601925
00000008_1.tif	control	CB1112	cat2(e1112)	14.88	7.516	4.73449	3.09999	-1.6345	0	0.29777	0.923083	-0.486706
00000008_1.tif	control	CB1112	cat2(e1112)	14.906	7.255	4.73449	3.36215	-1.37234	0	0.29777	1.00115	-0.40864
00000008_1.tif	control	CB1112	cat2(e1112)	15.557	10.802	4.73449	0.9058	-3.82869	0	0.29777	0.26972	-1.14007
00000008_1.tif	control	CB1112	cat2(e1112)	15.833	10.354	4.73449	1.18867	-3.54581	0	0.29777	0.353951	-1.05584
00000008_1.tif	control	CB1112	cat2(e1112)	15.943	6.635	4.73449	4.1723	-0.562185	0	0.29777	1.24239	-0.167402
00000008_1.tif	control	CB1112	cat2(e1112)	16.094	14.135	4.73449	3.80194	-0.932547	0	0.29777	1.1321	-0.277685
00000008_1.tif	control	CB1112	cat2(e1112)	16.141	11.417	4.73449	1.67655	-3.05794	0	0.29777	0.499227	-0.910562
00000008_1.tif	control	CB1112	cat2(e1112)	16.146	14.068	4.73449	3.75997	-0.974521	0	0.29777	1.11961	-0.290183
00000008_1.tif	control	CB1112	cat2(e1112)	16.458	12.172	4.73449	2.37334	-2.36114	0	0.29777	0.706711	-0.703078
00000008_1.tif	control	CB1112	cat2(e1112)	16.573	13.885	4.73449	3.78761	-0.94688	0	0.29777	1.12784	-0.281953
00000008_1.tif	control	CB1112	cat2(e1112)	16.594	9.875	4.73449	2.05739	-2.6771	0	0.29777	0.612628	-0.797161
00000008_1.tif	control	CB1112	cat2(e1112)	16.661	13.833	4.73449	3.78818	-0.94631	0	0.29777	1.12801	-0.281783
00000008_1.tif	control	CB1112	cat2(e1112)	16.667	9.047	4.73449	2.53375	-2.20074	0	0.29777	0.754474	-0.655315
00000008_1.tif	control	CB1112	cat2(e1112)	16.667	12.922	4.73449	3.0545	-1.67998	0	0.29777	0.90954	-0.500249
00000008_1.tif	control	CB1112	cat2(e1112)	16.714	12.62	4.73449	2.86599	-1.8685	0	0.29777	0.853405	-0.556384
00000008_1.tif	control	CB1112	cat2(e1112)	16.771	13.62	4.73449	3.67041	-1.06408	0	0.29777	1.09294	-0.31685
00000008_1.tif	control	CB1112	cat2(e1112)	16.823	8.016	4.73449	3.36904	-1.36545	0	0.29777	1.0032	-0.406589
00000008_1.tif	control	CB1112	cat2(e1112)	16.995	8.078	4.73449	3.43545	-1.29904	0	0.29777	1.02297	-0.386816
00000008_1.tif	control	CB1112	cat2(e1112)	17.057	13.391	4.73449	3.66439	-1.0701	0	0.29777	1.09115	-0.318643
00000008_1.tif	control	CB1112	cat2(e1112)	17.062	7.833	4.73449	3.6631	-1.07139	0	0.29777	1.09076	-0.319028
00000008_1.tif	control	CB1112	cat2(e1112)	17.089	13.943	4.73449	4.11794	-0.616547	0	0.29777	1.2262	-0.183589
00000008_1.tif	control	CB1112	cat2(e1112)	17.099	8.109	4.73449	3.4843	-1.25019	0	0.29777	1.03752	-0.372269
00000008_1.tif	control	CB1112	cat2(e1112)	18.01	9.958	4.73449	3.40089	-1.3336	0	0.29777	1.01268	-0.397106
00000008_1.tif	control	CB1112	cat2(e1112)	18.771	15.479	4.73449	6.36543	1.63094	1	0.29777	1.89543	0.485645
00000008_3.tif	predator	CB1112	cat2(e1112)	5.458	11.656	5.65114	9.53095	3.8798	1	0.29777	2.83803	1.15529
00000008_3.tif	predator	CB1112	cat2(e1112)	7.516	8.37	5.65114	8.04024	2.3891	1	0.29777	2.39414	0.711402
00000008_3.tif	predator	CB1112	cat2(e1112)	7.651	8.266	5.65114	7.95473	2.30359	1	0.29777	2.36868	0.685941
00000008_3.tif	predator	CB1112	cat2(e1112)	9.484	5.057	5.65114	8.35699	2.70585	1	0.29777	2.48846	0.80572
00000008_3.tif	predator	CB1112	cat2(e1112)	9.943	11.714	5.65114	5.0542	-0.596944	0	0.29777	1.50499	-0.177752
00000008_3.tif	predator	CB1112	cat2(e1112)	10.974	12.443	5.65114	4.15655	-1.49459	0	0.29777	1.2377	-0.445043
00000008_3.tif	predator	CB1112	cat2(e1112)	11.172	8.682	5.65114	4.65234	-0.998805	0	0.29777	1.38533	-0.297414
00000008_3.tif	predator	CB1112	cat2(e1112)	11.682	17.87	5.65114	7.30935	1.65821	1	0.29777	2.17651	0.493766
00000008_3.tif	predator	CB1112	cat2(e1112)	11.714	12.828	5.65114	3.58892	-2.06222	0	0.29777	1.06867	-0.614068
00000008_3.tif	predator	CB1112	cat2(e1112)	11.776	17.536	5.65114	6.96923	1.31809	1	0.29777	2.07523	0.392489
00000008_3.tif	predator	CB1112	cat2(e1112)	12.026	11.516	5.65114	2.96271	-2.68843	0	0.29777	0.882206	-0.800534
00000008_3.tif	predator	CB1112	cat2(e1112)	12.13	18.401	5.65114	7.60763	1.95649	1	0.29777	2.26532	0.582583
00000008_3.tif	predator	CB1112	cat2(e1112)	12.151	7.651	5.65114	4.65844	-0.992698	0	0.29777	1.38714	-0.295596
00000008_3.tif	predator	CB1112	cat2(e1112)	12.193	18.38	5.65114	7.5647	1.91356	1	0.29777	2.25254	0.5698
00000008_3.tif	predator	CB1112	cat2(e1112)	12.224	13.474	5.65114	3.48328	-2.16786	0	0.29777	1.03722	-0.645525
00000008_3.tif	predator	CB1112	cat2(e1112)	12.297	13.891	5.65114	3.69888	-1.95226	0	0.29777	1.10142	-0.581324
00000008_3.tif	predator	CB1112	cat2(e1112)	12.328	10.995	5.65114	2.67949	-2.97165	0	0.29777	0.797871	-0.884869
00000008_3.tif	predator	CB1112	cat2(e1112)	13.141	17.089	5.65114	6.02862	0.377478	1	0.29777	1.79514	0.112402
00000008_3.tif	predator	CB1112	cat2(e1112)	13.339	9.214	5.65114	2.69523	-2.95591	0	0.29777	0.802558	-0.880182
00000008_3.tif	predator	CB1112	cat2(e1112)	13.38	17.224	5.65114	6.09003	0.438887	1	0.29777	1.81343	0.130687
00000008_3.tif	predator	CB1112	cat2(e1112)	13.536	17.172	5.65114	6.00034	0.349195	1	0.29777	1.78672	0.10398
00000008_3.tif	predator	CB1112	cat2(e1112)	13.536	9.734	5.65114	2.16908	-3.48206	0	0.29777	0.645888	-1.03685
00000008_3.tif	predator	CB1112	cat2(e1112)	13.859	3.078	5.65114	8.34716	2.69602	1	0.29777	2.48553	0.802793
00000008_3.tif	predator	CB1112	cat2(e1112)	14.016	3.161	5.65114	8.24502	2.59388	1	0.29777	2.45512	0.77238
00000008_3.tif	predator	CB1112	cat2(e1112)	15.207	17.22	5.65114	5.87523	0.224093	1	0.29777	1.74947	0.0667281
00000008_3.tif	predator	CB1112	cat2(e1112)	15.54	11.793	5.65114	0.711528	-4.93961	0	0.29777	0.211872	-1.47087
00000008_3.tif	predator	CB1112	cat2(e1112)	15.595	11.342	5.65114	0.61104	-5.0401	0	0.29777	0.181949	-1.50079
00000008_3.tif	predator	CB1112	cat2(e1112)	15.797	2.071	5.65114	9.31355	3.66241	1	0.29777	2.7733	1.09056
00000008_3.tif	predator	CB1112	cat2(e1112)	16.193	11.175	5.65114	1.22146	-4.42968	0	0.29777	0.363713	-1.31903
00000008_3.tif	predator	CB1112	cat2(e1112)	16.644	11.682	5.65114	1.69307	-3.95807	0	0.29777	0.504146	-1.17859
00000008_3.tif	predator	CB1112	cat2(e1112)	16.859	13.498	5.65114	2.85199	-2.79915	0	0.29777	0.849236	-0.833504
00000008_3.tif	predator	CB1112	cat2(e1112)	17.214	9.342	5.65114	3.00016	-2.65098	0	0.29777	0.893357	-0.789383
00000008_3.tif	predator	CB1112	cat2(e1112)	17.311	9.286	5.65114	3.10981	-2.54133	0	0.29777	0.926007	-0.756733
00000008_3.tif	predator	CB1112	cat2(e1112)	17.443	5.818	5.65114	6.05299	0.401845	1	0.29777	1.8024	0.119657
00000008_3.tif	predator	CB1112	cat2(e1112)	17.45	13.394	5.65114	3.20362	-2.44752	0	0.29777	0.953942	-0.728798
00000008_3.tif	predator	CB1112	cat2(e1112)	17.512	15.679	5.65114	5.01395	-0.637192	0	0.29777	1.493	-0.189737
00000008_3.tif	predator	CB1112	cat2(e1112)	17.519	5.943	5.65114	5.97085	0.31971	1	0.29777	1.77794	0.0952
00000008_3.tif	predator	CB1112	cat2(e1112)	17.582	15.859	5.65114	5.20478	-0.446364	0	0.29777	1.54983	-0.132914
00000008_3.tif	predator	CB1112	cat2(e1112)	17.686	16.255	5.65114	5.60086	-0.0502803	0	0.29777	1.66777	-0.014972
00000008_3.tif	predator	CB1112	cat2(e1112)	17.769	15.387	5.65114	4.90527	-0.745871	0	0.29777	1.46064	-0.222098
00000008_3.tif	predator	CB1112	cat2(e1112)	17.866	20.641	5.65114	9.72868	4.07754	1	0.29777	2.89691	1.21417
00000008_3.tif	predator	CB1112	cat2(e1112)	18.179	8.696	5.65114	4.15288	-1.49826	0	0.29777	1.2366	-0.446136
00000008_3.tif	predator	CB1112	cat2(e1112)	18.651	8.821	5.65114	4.45395	-1.19719	0	0.29777	1.32625	-0.356487
00000008_3.tif	predator	CB1112	cat2(e1112)	20.075	9.339	5.65114	5.47342	-0.177716	0	0.29777	1.62982	-0.0529185
00000008_3.tif	predator	CB1112	cat2(e1112)	20.137	9.207	5.65114	5.58046	-0.0706775	0	0.29777	1.66169	-0.0210456
00000008_3.tif	predator	CB1112	cat2(e1112)	23.095	14.005	5.65114	8.53479	2.88365	1	0.29777	2.5414	0.858664
00000008_3.tif	predator	CB1112	cat2(e1112)	23.248	13.88	5.65114	8.6429	2.99176	1	0.29777	2.5736	0.890855
00000008_8.tif	predator	IV111	CEPrescue	4.321	8.665	4.85416	10.4775	5.62329	1	0.29777	3.11987	1.67445
00000008_8.tif	predator	IV111	CEPrescue	5.8	16.023	4.85416	9.42266	4.5685	1	0.29777	2.80579	1.36036
00000008_8.tif	predator	IV111	CEPrescue	5.823	15.844	4.85416	9.32519	4.47102	1	0.29777	2.77676	1.33134
00000008_8.tif	predator	IV111	CEPrescue	6.182	16.432	4.85416	9.27249	4.41833	1	0.29777	2.76107	1.31564
00000008_8.tif	predator	IV111	CEPrescue	6.661	16.3	4.85416	8.79063	3.93646	1	0.29777	2.61758	1.17216
00000008_8.tif	predator	IV111	CEPrescue	6.717	6.394	4.85416	9.36577	4.51161	1	0.29777	2.78884	1.34342
00000008_8.tif	predator	IV111	CEPrescue	6.759	16.043	4.85416	8.5793	3.72514	1	0.29777	2.55466	1.10923
00000008_8.tif	predator	IV111	CEPrescue	6.967	8.207	4.85416	8.20114	3.34698	1	0.29777	2.44205	0.99663
00000008_8.tif	predator	IV111	CEPrescue	7.182	5.22	4.85416	9.75939	4.90522	1	0.29777	2.90605	1.46063
00000008_8.tif	predator	IV111	CEPrescue	7.273	5.922	4.85416	9.22237	4.36821	1	0.29777	2.74614	1.30072
00000008_8.tif	predator	IV111	CEPrescue	7.523	13.293	4.85416	6.89666	2.0425	1	0.29777	2.05362	0.608195
00000008_8.tif	control	IV552	APDErescue	7.656	10.198	4.69292	7.04688	2.35396	1	0.29777	2.09835	0.700938
00000008_8.tif	control	IV552	APDErescue	7.668	10.002	4.69292	7.07881	2.38588	1	0.29777	2.10786	0.710445
00000008_8.tif	predator	IV111	CEPrescue	7.828	5.269	4.85416	9.26483	4.41067	1	0.29777	2.75879	1.31337
00000008_8.tif	predator	IV111	CEPrescue	7.905	5.679	4.85416	8.91998	4.06582	1	0.29777	2.6561	1.21068
00000008_8.tif	predator	IV111	CEPrescue	7.925	18.977	4.85416	9.4996	4.64543	1	0.29777	2.82869	1.38327
00000008_8.tif	predator	IV111	CEPrescue	8.113	8.234	4.85416	7.18392	2.32976	1	0.29777	2.13916	0.693732
[truncated: 6,434 more rows]
