# Supplementary material for: Dopamine signaling regulates predator-driven changes in Caenorhabditis elegans’ egg laying behavior
Source: eLife. 2023 Jul 11;12:e83957. doi: 10.7554/eLife.83957 (PMC10335835; doi:10.7554/eLife.83957)
Supplement: Figure 7—source data 1. — For each test arena, data tabulate the arena, predator exposure condition, genotype, dopamine addition, <x,y> coordinates in pixels, lawn radius in pixels, the egg distance from arena center in pixels, the egg distance from lawn edge in pixels, position as 1 (off) or 0 (on) lawn, the conversion factor for pixel data in mm-per-pixel, the calculated distance from center in mm, the calculated distance from the lawn edge in mm. [file elife-83957-fig7-data1.xlsx]

## Sheet: Figure7B-D
Arena	Condition	Strain	Genotype	Treatment	X	Y	LawnRadius	DistCenterPx	DistEdgePx	off	PxScale	DistCenterMm	DistEdgeMm
0000001_26.tif	predator	N2	wt	DA	8.688	18.365	4.95839	8.59331	3.63492	1	0.29777	2.55883	1.08237
0000001_26.tif	predator	N2	wt	DA	8.821	18.269	4.95839	8.43408	3.47569	1	0.29777	2.51141	1.03496
0000001_26.tif	predator	N2	wt	DA	9.877	16.033	4.95839	6.0774	1.11901	1	0.29777	1.80967	0.333208
0000001_26.tif	predator	N2	wt	DA	9.842	15.873	4.95839	5.99343	1.03504	1	0.29777	1.78466	0.308205
0000001_26.tif	predator	N2	wt	DA	8.252	5.255	4.95839	8.90139	3.943	1	0.29777	2.65057	1.17411
0000001_26.tif	predator	N2	wt	DA	8.252	5.033	4.95839	9.06643	4.10804	1	0.29777	2.69971	1.22325
0000001_26.tif	predator	N2	wt	DA	10.655	3.97	4.95839	8.64093	3.68254	1	0.29777	2.57301	1.09655
0000001_26.tif	predator	N2	wt	DA	10.064	3.339	4.95839	9.46492	4.50653	1	0.29777	2.81837	1.34191
0000001_26.tif	predator	N2	wt	DA	16.484	9.38	4.95839	3.3037	-1.65469	0	0.29777	0.983742	-0.492717
0000001_26.tif	predator	N2	wt	DA	16.477	9.484	4.95839	3.22273	-1.73566	0	0.29777	0.959633	-0.516826
0000001_26.tif	predator	N2	wt	DA	13.484	21.689	4.95839	9.89647	4.93808	1	0.29777	2.94687	1.47041
0000001_26.tif	predator	N2	wt	DA	13.686	21.467	4.95839	9.66107	4.70268	1	0.29777	2.87678	1.40032
0000001_26.tif	predator	N2	wt	DA	14.776	21.37	4.95839	9.56093	4.60255	1	0.29777	2.84696	1.3705
0000001_26.tif	predator	N2	wt	DA	22.97	16.245	4.95839	9.76822	4.80983	1	0.29777	2.90868	1.43222
0000001_26.tif	predator	N2	wt	DA	23.061	16.148	4.95839	9.80629	4.8479	1	0.29777	2.92002	1.44356
0000001_26.tif	predator	N2	wt	DA	23.089	16.03	4.95839	9.78009	4.8217	1	0.29777	2.91222	1.43576
0000001_26.tif	predator	N2	wt	DA	22.804	16.05	4.95839	9.53244	4.57405	1	0.29777	2.83848	1.36202
0000002_28.tif	predator	N2	wt	DA	4.669	5.009	4.60954	9.14797	4.53843	1	0.29777	2.72399	1.35141
0000002_28.tif	predator	N2	wt	DA	5.932	5.36	4.60954	8.02873	3.41919	1	0.29777	2.39071	1.01813
0000002_28.tif	predator	N2	wt	DA	4.345	5.894	4.60954	8.79769	4.18815	1	0.29777	2.61969	1.24711
0000002_28.tif	predator	N2	wt	DA	4.73	6.975	4.60954	7.8398	3.23026	1	0.29777	2.33446	0.961874
0000002_28.tif	predator	N2	wt	DA	6.101	8.023	4.60954	6.11649	1.50695	1	0.29777	1.82131	0.448725
0000002_28.tif	predator	N2	wt	DA	6.939	8.982	4.60954	4.89641	0.286872	1	0.29777	1.458	0.0854219
0000002_28.tif	predator	N2	wt	DA	6.439	11.187	4.60954	4.73992	0.130382	1	0.29777	1.41141	0.0388239
0000002_28.tif	predator	N2	wt	DA	6.331	11.133	4.60954	4.85092	0.24138	1	0.29777	1.44446	0.0718756
0000002_28.tif	predator	N2	wt	DA	6.256	11.235	4.60954	4.9204	0.310862	1	0.29777	1.46515	0.0925655
0000002_28.tif	predator	N2	wt	DA	3.588	14.076	4.60954	8.02806	3.41852	1	0.29777	2.39052	1.01793
0000002_28.tif	predator	N2	wt	DA	4	14.455	4.60954	7.7788	3.16926	1	0.29777	2.31629	0.943712
0000002_28.tif	predator	N2	wt	DA	4.986	16.807	4.60954	8.18774	3.5782	1	0.29777	2.43806	1.06548
0000002_28.tif	predator	N2	wt	DA	5.061	16.996	4.60954	8.25713	3.64759	1	0.29777	2.45872	1.08614
0000002_28.tif	predator	N2	wt	DA	4	17.361	4.60954	9.2984	4.68887	1	0.29777	2.76879	1.3962
0000002_28.tif	predator	N2	wt	DA	3.784	17.307	4.60954	9.43234	4.8228	1	0.29777	2.80867	1.43609
0000002_28.tif	predator	N2	wt	DA	6.635	19.187	4.60954	8.97518	4.36565	1	0.29777	2.67254	1.29996
0000002_28.tif	predator	N2	wt	DA	6.716	19.167	4.60954	8.91718	4.30764	1	0.29777	2.65527	1.28269
0000002_28.tif	predator	N2	wt	DA	8.021	11.073	4.60954	3.17265	-1.43689	0	0.29777	0.94472	-0.427862
0000002_28.tif	predator	N2	wt	DA	7.891	9.214	4.60954	3.96654	-0.643001	0	0.29777	1.18112	-0.191466
0000002_28.tif	predator	N2	wt	DA	7.891	9.13	4.60954	4.01434	-0.595195	0	0.29777	1.19535	-0.177231
0000002_28.tif	predator	N2	wt	DA	11.984	3.63	4.60954	7.85508	3.24555	1	0.29777	2.33901	0.966426
0000002_28.tif	predator	N2	wt	DA	13.255	7.448	4.60954	4.50543	-0.104104	0	0.29777	1.34158	-0.0309991
0000002_28.tif	predator	N2	wt	DA	13.786	7.802	4.60954	4.48217	-0.127363	0	0.29777	1.33466	-0.0379248
0000002_28.tif	predator	N2	wt	DA	13.943	7.76	4.60954	4.60901	-0.000530618	0	0.29777	1.37242	-0.000158002
0000002_28.tif	predator	N2	wt	DA	15.448	15.745	4.60954	6.06559	1.45605	1	0.29777	1.80615	0.433569
0000002_28.tif	predator	N2	wt	DA	15.391	15.531	4.60954	5.87467	1.26513	1	0.29777	1.7493	0.376718
0000002_28.tif	predator	N2	wt	DA	16.688	14.135	4.60954	6.13784	1.52831	1	0.29777	1.82767	0.455084
0000002_28.tif	predator	N2	wt	DA	14.755	8.766	4.60954	4.47261	-0.136928	0	0.29777	1.33181	-0.0407732
0000002_28.tif	predator	N2	wt	DA	17.161	9.036	4.60954	6.45459	1.84506	1	0.29777	1.92198	0.549403
0000002_28.tif	predator	N2	wt	DA	17.536	9.167	4.60954	6.75875	2.14921	1	0.29777	2.01255	0.639971
0000002_28.tif	predator	N2	wt	DA	16.188	5.943	4.60954	7.44381	2.83427	1	0.29777	2.21654	0.843961
0000002_28.tif	predator	N2	wt	DA	17.266	6.438	4.60954	7.88586	3.27633	1	0.29777	2.34817	0.975592
0000002_28.tif	predator	N2	wt	DA	18.495	3.854	4.60954	10.5461	5.93652	1	0.29777	3.1403	1.76772
0000002_28.tif	predator	N2	wt	DA	20.043	13.849	4.60954	9.19149	4.58195	1	0.29777	2.73695	1.36437
0000002_28.tif	predator	N2	wt	DA	20.113	13.793	4.60954	9.24467	4.63514	1	0.29777	2.75279	1.3802
00000005_8.tif	control	CB1112	cat2(e1112)	DA	5.146	15.005	4.75515	8.227	3.47185	1	0.29777	2.44975	1.03381
00000005_8.tif	control	CB1112	cat2(e1112)	DA	7.229	20.172	4.75515	9.60543	4.85028	1	0.29777	2.86021	1.44427
00000005_8.tif	control	CB1112	cat2(e1112)	DA	7.948	19.938	4.75515	8.99844	4.24329	1	0.29777	2.67947	1.26352
00000005_8.tif	control	CB1112	cat2(e1112)	DA	8.797	12.286	4.75515	4.18123	-0.573922	0	0.29777	1.24504	-0.170897
00000005_8.tif	control	CB1112	cat2(e1112)	DA	8.786	11.656	4.75515	4.26714	-0.488013	0	0.29777	1.27063	-0.145316
00000005_8.tif	control	CB1112	cat2(e1112)	DA	8.797	11.589	4.75515	4.26973	-0.485426	0	0.29777	1.2714	-0.144545
00000005_8.tif	control	CB1112	cat2(e1112)	DA	9.266	10.422	4.75515	4.23792	-0.517231	0	0.29777	1.26193	-0.154016
00000005_8.tif	control	CB1112	cat2(e1112)	DA	10.339	8.385	4.75515	4.86448	0.109327	1	0.29777	1.4485	0.0325543
00000005_8.tif	control	CB1112	cat2(e1112)	DA	9.88	9.25	4.75515	4.46845	-0.286705	0	0.29777	1.33057	-0.0853721
00000005_8.tif	control	CB1112	cat2(e1112)	DA	11.979	10.229	4.75515	2.45562	-2.29953	0	0.29777	0.731209	-0.684733
00000005_8.tif	control	CB1112	cat2(e1112)	DA	11.833	10.844	4.75515	1.98967	-2.76548	0	0.29777	0.592464	-0.823478
00000005_8.tif	control	CB1112	cat2(e1112)	DA	12.135	11.724	4.75515	1.12535	-3.6298	0	0.29777	0.335097	-1.08084
00000005_8.tif	control	CB1112	cat2(e1112)	DA	11.448	12.583	4.75515	1.52989	-3.22526	0	0.29777	0.455555	-0.960387
00000005_8.tif	control	CB1112	cat2(e1112)	DA	11.432	13.266	4.75515	1.7335	-3.02165	0	0.29777	0.516185	-0.899757
00000005_8.tif	control	CB1112	cat2(e1112)	DA	9.677	13.651	4.75515	3.50079	-1.25436	0	0.29777	1.04243	-0.373511
00000005_8.tif	control	CB1112	cat2(e1112)	DA	9.552	13.776	4.75515	3.66132	-1.09383	0	0.29777	1.09023	-0.325709
00000005_8.tif	control	CB1112	cat2(e1112)	DA	11.13	14.953	4.75515	3.08962	-1.66553	0	0.29777	0.919997	-0.495944
00000005_8.tif	control	CB1112	cat2(e1112)	DA	11.115	15.005	4.75515	3.14036	-1.61479	0	0.29777	0.935104	-0.480837
00000005_8.tif	control	CB1112	cat2(e1112)	DA	11.359	16.094	4.75515	3.96392	-0.791236	0	0.29777	1.18034	-0.235606
00000005_8.tif	control	CB1112	cat2(e1112)	DA	14.823	17.021	4.75515	4.90856	0.153414	1	0.29777	1.46162	0.0456821
00000005_8.tif	control	CB1112	cat2(e1112)	DA	14.469	15.396	4.75515	3.28224	-1.47291	0	0.29777	0.977353	-0.438588
00000005_8.tif	control	CB1112	cat2(e1112)	DA	15.703	15.464	4.75515	4.04815	-0.706998	0	0.29777	1.20542	-0.210523
00000005_8.tif	control	CB1112	cat2(e1112)	DA	14.036	13.943	4.75515	1.81268	-2.94247	0	0.29777	0.539761	-0.87618
00000005_8.tif	control	CB1112	cat2(e1112)	DA	15.047	13.49	4.75515	2.30859	-2.44656	0	0.29777	0.687429	-0.728513
00000005_8.tif	control	CB1112	cat2(e1112)	DA	15.177	13.427	4.75515	2.4003	-2.35486	0	0.29777	0.714736	-0.701205
00000005_8.tif	control	CB1112	cat2(e1112)	DA	12.365	12.151	4.75515	0.689355	-4.0658	0	0.29777	0.205269	-1.21067
00000005_8.tif	control	CB1112	cat2(e1112)	DA	12.349	11.021	4.75515	1.58172	-3.17343	0	0.29777	0.470988	-0.944953
00000005_8.tif	control	CB1112	cat2(e1112)	DA	12.99	10.672	4.75515	1.80207	-2.95308	0	0.29777	0.536603	-0.879339
00000005_8.tif	control	CB1112	cat2(e1112)	DA	13.021	10.536	4.75515	1.93857	-2.81658	0	0.29777	0.577248	-0.838693
00000005_8.tif	control	CB1112	cat2(e1112)	DA	13.448	11.083	4.75515	1.46954	-3.28561	0	0.29777	0.437586	-0.978355
00000005_8.tif	control	CB1112	cat2(e1112)	DA	13.385	10.969	4.75515	1.56011	-3.19504	0	0.29777	0.464554	-0.951387
00000005_8.tif	control	CB1112	cat2(e1112)	DA	13.536	10.531	4.75515	2.02265	-2.73251	0	0.29777	0.602283	-0.813658
00000005_8.tif	control	CB1112	cat2(e1112)	DA	14.656	10.505	4.75515	2.58961	-2.16554	0	0.29777	0.771108	-0.644833
00000005_8.tif	control	CB1112	cat2(e1112)	DA	13.276	7.562	4.75515	4.92128	0.166124	1	0.29777	1.46541	0.0494668
00000005_8.tif	control	CB1112	cat2(e1112)	DA	13.151	7.547	4.75515	4.93018	0.175027	1	0.29777	1.46806	0.0521179
00000005_8.tif	control	CB1112	cat2(e1112)	DA	18.036	8.141	4.75515	6.66324	1.90809	1	0.29777	1.98411	0.568171
00000005_8.tif	control	CB1112	cat2(e1112)	DA	18.036	7.911	4.75515	6.81504	2.05989	1	0.29777	2.02932	0.613374
00000005_8.tif	control	CB1112	cat2(e1112)	DA	17.125	11.276	4.75515	4.32042	-0.434734	0	0.29777	1.28649	-0.129451
00000005_8.tif	control	CB1112	cat2(e1112)	DA	16.859	12.651	4.75515	3.88903	-0.866121	0	0.29777	1.15804	-0.257905
00000005_8.tif	control	CB1112	cat2(e1112)	DA	16.823	13.375	4.75515	3.95305	-0.802101	0	0.29777	1.1771	-0.238842
00000005_8.tif	control	CB1112	cat2(e1112)	DA	16.12	15.406	4.75515	4.30046	-0.454693	0	0.29777	1.28055	-0.135394
00000005_8.tif	control	CB1112	cat2(e1112)	DA	16.745	16.083	4.75515	5.21971	0.464554	1	0.29777	1.55427	0.13833
00000005_8.tif	control	CB1112	cat2(e1112)	DA	19.094	19.479	4.75515	9.30185	4.5467	1	0.29777	2.76981	1.35387
0000005_24.tif	control	N2	wt	VEH	7.682	3.552	5.02103	8.96218	3.94114	1	0.29777	2.66867	1.17355
0000005_24.tif	control	N2	wt	VEH	7.615	4.109	5.02103	8.54598	3.52495	1	0.29777	2.54474	1.04962
0000005_24.tif	control	N2	wt	VEH	8.807	8.964	5.02103	4.38179	-0.639241	0	0.29777	1.30477	-0.190347
0000005_24.tif	control	N2	wt	VEH	9.043	8.748	5.02103	4.2821	-0.738933	0	0.29777	1.27508	-0.220032
0000005_24.tif	control	N2	wt	VEH	9.672	9.311	5.02103	3.45527	-1.56576	0	0.29777	1.02888	-0.466237
0000005_24.tif	control	N2	wt	VEH	9.686	9.241	5.02103	3.47747	-1.54357	0	0.29777	1.03549	-0.459627
0000005_24.tif	control	N2	wt	VEH	10.616	8.325	5.02103	3.37319	-1.64784	0	0.29777	1.00444	-0.490677
0000005_24.tif	control	N2	wt	VEH	10.453	6.946	5.02103	4.61575	-0.405287	0	0.29777	1.37443	-0.120682
0000005_24.tif	control	N2	wt	VEH	10.377	6.856	5.02103	4.7314	-0.289631	0	0.29777	1.40887	-0.0862435
0000005_24.tif	control	N2	wt	VEH	10.234	6.88	5.02103	4.78258	-0.238451	0	0.29777	1.42411	-0.0710036
0000005_24.tif	control	N2	wt	VEH	8.345	11.082	5.02103	4.35422	-0.666815	0	0.29777	1.29656	-0.198558
0000005_24.tif	control	N2	wt	VEH	8.38	11.165	5.02103	4.322	-0.69903	0	0.29777	1.28696	-0.20815
0000005_24.tif	control	N2	wt	VEH	8.571	10.71	5.02103	4.13576	-0.885276	0	0.29777	1.2315	-0.263609
0000005_24.tif	control	N2	wt	VEH	11.984	15.38	5.02103	4.45854	-0.562492	0	0.29777	1.32762	-0.167493
0000005_24.tif	control	N2	wt	VEH	11.953	15.307	5.02103	4.39165	-0.629382	0	0.29777	1.3077	-0.187411
0000005_24.tif	control	N2	wt	VEH	13.339	15.271	5.02103	4.3396	-0.681432	0	0.29777	1.2922	-0.20291
0000005_24.tif	control	N2	wt	VEH	13.234	14.812	5.02103	3.8703	-1.15074	0	0.29777	1.15246	-0.342655
0000005_24.tif	control	N2	wt	VEH	13.13	12.062	5.02103	1.16598	-3.85505	0	0.29777	0.347194	-1.14792
0000005_24.tif	control	N2	wt	VEH	13.12	11.927	5.02103	1.03768	-3.98335	0	0.29777	0.308991	-1.18612
0000005_24.tif	control	N2	wt	VEH	11.172	10.042	5.02103	1.79071	-3.23032	0	0.29777	0.53322	-0.961893
0000005_24.tif	control	N2	wt	VEH	11.281	10.016	5.02103	1.71326	-3.30777	0	0.29777	0.510157	-0.984956
0000005_24.tif	control	N2	wt	VEH	11.073	8.427	5.02103	3.02545	-1.99559	0	0.29777	0.900887	-0.594226
0000005_24.tif	control	N2	wt	VEH	11.469	8.208	5.02103	3.03132	-1.98972	0	0.29777	0.902635	-0.592478
0000005_24.tif	control	N2	wt	VEH	12.917	8.349	5.02103	2.6391	-2.38193	0	0.29777	0.785845	-0.709268
0000005_24.tif	control	N2	wt	VEH	11.896	7.297	5.02103	3.76833	-1.2527	0	0.29777	1.1221	-0.373017
0000005_24.tif	control	N2	wt	VEH	12.177	6.917	5.02103	4.09528	-0.925758	0	0.29777	1.21945	-0.275663
0000005_24.tif	control	N2	wt	VEH	11.656	6.599	5.02103	4.50224	-0.518794	0	0.29777	1.34063	-0.154481
0000005_24.tif	control	N2	wt	VEH	13.286	6.776	5.02103	4.24393	-0.777102	0	0.29777	1.26372	-0.231398
0000005_24.tif	control	N2	wt	VEH	13.391	6.479	5.02103	4.55305	-0.467985	0	0.29777	1.35576	-0.139352
0000005_24.tif	control	N2	wt	VEH	14.083	7.307	5.02103	3.92451	-1.09652	0	0.29777	1.1686	-0.326511
0000005_24.tif	control	N2	wt	VEH	14.969	7.677	5.02103	4.00757	-1.01346	0	0.29777	1.19334	-0.301778
0000005_24.tif	control	N2	wt	VEH	15.807	8.859	5.02103	3.76301	-1.25802	0	0.29777	1.12051	-0.3746
0000005_24.tif	control	N2	wt	VEH	15.365	8.771	5.02103	3.46239	-1.55864	0	0.29777	1.031	-0.464117
0000005_24.tif	control	N2	wt	VEH	15.406	8.693	5.02103	3.54388	-1.47716	0	0.29777	1.05526	-0.439853
0000005_24.tif	control	N2	wt	VEH	14.005	9.469	5.02103	1.99709	-3.02395	0	0.29777	0.594672	-0.900441
0000005_24.tif	control	N2	wt	VEH	14.047	9.344	5.02103	2.11968	-2.90136	0	0.29777	0.631176	-0.863937
0000005_24.tif	control	N2	wt	VEH	15.927	9.75	5.02103	3.45498	-1.56605	0	0.29777	1.02879	-0.466324
0000005_24.tif	control	N2	wt	VEH	16.51	10.224	5.02103	3.88605	-1.13499	0	0.29777	1.15715	-0.337965
0000005_24.tif	control	N2	wt	VEH	15.208	13.026	5.02103	3.23887	-1.78216	0	0.29777	0.96444	-0.530674
0000005_24.tif	control	N2	wt	VEH	15.323	12.76	5.02103	3.17216	-1.84888	0	0.29777	0.944573	-0.55054
0000005_24.tif	control	N2	wt	VEH	15.505	12.802	5.02103	3.34703	-1.67401	0	0.29777	0.996644	-0.49847
0000005_24.tif	control	N2	wt	VEH	14.786	13.245	5.02103	3.08131	-1.93972	0	0.29777	0.917523	-0.57759
0000005_24.tif	control	N2	wt	VEH	14.031	13.901	5.02103	3.21169	-1.80934	0	0.29777	0.956346	-0.538767
0000005_24.tif	control	N2	wt	VEH	15.047	14.318	5.02103	4.08249	-0.938544	0	0.29777	1.21564	-0.27947
0000005_24.tif	control	N2	wt	VEH	13.927	15.203	5.02103	4.39916	-0.621873	0	0.29777	1.30994	-0.185175
0000005_24.tif	control	N2	wt	VEH	16.693	12.344	5.02103	4.22176	-0.799275	0	0.29777	1.25711	-0.238
0000005_24.tif	control	N2	wt	VEH	16.646	10.13	5.02103	4.03826	-0.982779	0	0.29777	1.20247	-0.292642
0000005_30.tif	predator	N2	wt	VEH	9.116	15.443	4.974	5.72167	0.747678	1	0.29777	1.70374	0.222636
0000005_30.tif	predator	N2	wt	VEH	9.092	15.283	4.974	5.61922	0.645225	1	0.29777	1.67324	0.192129
0000005_30.tif	predator	N2	wt	VEH	6.99	11.771	4.974	5.95234	0.978343	1	0.29777	1.77243	0.291321
0000005_30.tif	predator	N2	wt	VEH	7.526	11.682	4.974	5.41014	0.436149	1	0.29777	1.61098	0.129872
0000005_30.tif	predator	N2	wt	VEH	8.969	11.286	4.974	3.94398	-1.03001	0	0.29777	1.1744	-0.306707
0000005_30.tif	predator	N2	wt	VEH	8.698	10.24	4.974	4.31249	-0.661501	0	0.29777	1.28413	-0.196975
0000005_30.tif	predator	N2	wt	VEH	6.901	9.802	4.974	6.16174	1.18774	1	0.29777	1.83478	0.353673
0000005_30.tif	predator	N2	wt	VEH	8.292	8.708	4.974	5.22995	0.255953	1	0.29777	1.55732	0.0762152
0000005_30.tif	predator	N2	wt	VEH	9.12	8.458	4.974	4.65595	-0.318044	0	0.29777	1.3864	-0.0947039
0000005_30.tif	predator	N2	wt	VEH	9.177	8.323	4.974	4.6901	-0.2839	0	0.29777	1.39657	-0.0845369
0000005_30.tif	predator	N2	wt	VEH	9.182	6.167	4.974	6.23261	1.25862	1	0.29777	1.85589	0.374779
0000005_30.tif	predator	N2	wt	VEH	8.88	5.922	4.974	6.6103	1.63631	1	0.29777	1.96835	0.487243
0000005_30.tif	predator	N2	wt	VEH	12.672	1.885	4.974	9.27908	4.30508	1	0.29777	2.76303	1.28192
0000005_30.tif	predator	N2	wt	VEH	12.839	1.807	4.974	9.35428	4.38028	1	0.29777	2.78542	1.30432
0000005_30.tif	predator	N2	wt	VEH	13.542	5.531	4.974	5.66525	0.691254	1	0.29777	1.68694	0.205835
0000005_30.tif	predator	N2	wt	VEH	12.266	6.036	4.974	5.16543	0.191432	1	0.29777	1.53811	0.0570028
0000005_30.tif	predator	N2	wt	VEH	10.693	7.469	4.974	4.30702	-0.66698	0	0.29777	1.2825	-0.198607
0000005_30.tif	predator	N2	wt	VEH	12.557	9.38	4.974	1.81584	-3.15816	0	0.29777	0.540703	-0.940404
0000005_30.tif	predator	N2	wt	VEH	12.328	9.099	4.974	2.14283	-2.83116	0	0.29777	0.638071	-0.843035
0000005_30.tif	predator	N2	wt	VEH	12.849	8.224	4.974	2.93765	-2.03634	0	0.29777	0.874745	-0.606361
0000005_30.tif	predator	N2	wt	VEH	11.714	9.516	4.974	2.03441	-2.93958	0	0.29777	0.605787	-0.87532
0000005_30.tif	predator	N2	wt	VEH	11.646	11.526	4.974	1.31661	-3.65739	0	0.29777	0.392046	-1.08906
0000005_30.tif	predator	N2	wt	VEH	12.047	15.411	4.974	4.33693	-0.637062	0	0.29777	1.29141	-0.189698
0000005_30.tif	predator	N2	wt	VEH	10.682	21.63	4.974	10.7037	5.72967	1	0.29777	3.18723	1.70612
0000005_30.tif	predator	N2	wt	VEH	15.125	20.396	4.974	9.49668	4.52269	1	0.29777	2.82783	1.34672
0000005_30.tif	predator	N2	wt	VEH	16.286	14.036	4.974	4.43354	-0.540459	0	0.29777	1.32017	-0.160932
0000005_30.tif	predator	N2	wt	VEH	14.479	6.786	4.974	4.6475	-0.326497	0	0.29777	1.38389	-0.0972209
0000005_30.tif	predator	N2	wt	VEH	15.062	4.797	4.974	6.71769	1.74369	1	0.29777	2.00033	0.519218
0000005_30.tif	predator	N2	wt	VEH	15.083	4.536	4.974	6.97196	1.99796	1	0.29777	2.07604	0.594933
0000005_30.tif	predator	N2	wt	VEH	14.073	1.849	4.974	9.38422	4.41022	1	0.29777	2.79434	1.31323
0000005_30.tif	predator	N2	wt	VEH	18.5	3.453	4.974	9.52104	4.54704	1	0.29777	2.83508	1.35397
0000005_30.tif	predator	N2	wt	VEH	16.719	9.651	4.974	4.09646	-0.877538	0	0.29777	1.2198	-0.261305
0000005_30.tif	predator	N2	wt	VEH	17.656	12.427	4.974	4.91099	-0.0630102	0	0.29777	1.46234	-0.0187626
0000005_30.tif	predator	N2	wt	VEH	17.094	12.979	4.974	4.56099	-0.413008	0	0.29777	1.35813	-0.122981
0000005_30.tif	predator	N2	wt	VEH	18.932	17.964	4.974	9.08478	4.11079	1	0.29777	2.70518	1.22407
0000005_30.tif	predator	N2	wt	VEH	18.865	18.271	4.974	9.27374	4.29974	1	0.29777	2.76144	1.28033
0000005_30.tif	predator	N2	wt	VEH	22.731	10.724	4.974	9.82972	4.85572	1	0.29777	2.927	1.44589
0000005_30.tif	predator	N2	wt	VEH	22.786	10.405	4.974	9.9039	4.9299	1	0.29777	2.94908	1.46798
0000009_16.tif	predator	CB1112	cat2(e1112)	VEH	9.464	7.651	4.87481	6.00265	1.12784	1	0.29777	1.78741	0.335837
0000009_16.tif	predator	CB1112	cat2(e1112)	VEH	9.505	8.089	4.87481	5.67163	0.796825	1	0.29777	1.68884	0.237271
0000009_16.tif	predator	CB1112	cat2(e1112)	VEH	10.219	11.776	4.87481	3.5017	-1.37311	0	0.29777	1.0427	-0.408871
0000009_16.tif	predator	CB1112	cat2(e1112)	VEH	10.688	12.568	4.87481	3.107	-1.76781	0	0.29777	0.925171	-0.5264
0000009_16.tif	predator	CB1112	cat2(e1112)	VEH	10.927	13.594	4.87481	3.27352	-1.60129	0	0.29777	0.974757	-0.476815
0000009_16.tif	predator	CB1112	cat2(e1112)	VEH	10.448	13.417	4.87481	3.61199	-1.26282	0	0.29777	1.07554	-0.376029
0000009_16.tif	predator	CB1112	cat2(e1112)	VEH	12.755	19.979	4.87481	8.1512	3.2764	1	0.29777	2.42718	0.975613
0000009_16.tif	predator	CB1112	cat2(e1112)	VEH	12.677	19.875	4.87481	8.05766	3.18285	1	0.29777	2.39933	0.947758
0000009_16.tif	predator	CB1112	cat2(e1112)	VEH	13.807	17.964	4.87481	6.07964	1.20483	1	0.29777	1.81033	0.358762
0000009_16.tif	predator	CB1112	cat2(e1112)	VEH	13.797	17.812	4.87481	5.92751	1.05271	1	0.29777	1.76504	0.313464
0000009_16.tif	predator	CB1112	cat2(e1112)	VEH	13.172	17.255	4.87481	5.39779	0.52298	1	0.29777	1.6073	0.155728
0000009_16.tif	predator	CB1112	cat2(e1112)	VEH	13.078	17.214	4.87481	5.36741	0.492606	1	0.29777	1.59825	0.146683
0000009_16.tif	predator	CB1112	cat2(e1112)	VEH	12.818	17.151	4.87481	5.34252	0.467717	1	0.29777	1.59084	0.139272
0000009_16.tif	predator	CB1112	cat2(e1112)	VEH	14.203	15.854	4.87481	3.9984	-0.876405	0	0.29777	1.1906	-0.260967
0000009_16.tif	predator	CB1112	cat2(e1112)	VEH	12.557	14.245	4.87481	2.63056	-2.24425	0	0.29777	0.783302	-0.66827
0000009_16.tif	predator	CB1112	cat2(e1112)	VEH	11.964	14.37	4.87481	3.04224	-1.83256	0	0.29777	0.905889	-0.545682
0000009_16.tif	predator	CB1112	cat2(e1112)	VEH	11.745	12.792	4.87481	2.1724	-2.70241	0	0.29777	0.646876	-0.804695
0000009_16.tif	predator	CB1112	cat2(e1112)	VEH	11.578	12.37	4.87481	2.19525	-2.67956	0	0.29777	0.653678	-0.797893
0000009_16.tif	predator	CB1112	cat2(e1112)	VEH	11.573	12.016	4.87481	2.14999	-2.72481	0	0.29777	0.640204	-0.811367
0000009_16.tif	predator	CB1112	cat2(e1112)	VEH	12.188	12.198	4.87481	1.56267	-3.31214	0	0.29777	0.465316	-0.986256
0000009_16.tif	predator	CB1112	cat2(e1112)	VEH	12.661	12.667	4.87481	1.31563	-3.55917	0	0.29777	0.391756	-1.05982
0000009_16.tif	predator	CB1112	cat2(e1112)	VEH	13.052	11.234	4.87481	0.932035	-3.94277	0	0.29777	0.277532	-1.17404
0000009_16.tif	predator	CB1112	cat2(e1112)	VEH	12.469	10.906	4.87481	1.58775	-3.28706	0	0.29777	0.472783	-0.978788
0000009_16.tif	predator	CB1112	cat2(e1112)	VEH	13.932	11.411	4.87481	0.519659	-4.35515	0	0.29777	0.154739	-1.29683
0000009_16.tif	predator	CB1112	cat2(e1112)	VEH	20.375	14.464	4.87481	7.13818	2.26337	1	0.29777	2.12554	0.673964
0000009_16.tif	predator	CB1112	cat2(e1112)	VEH	20.516	14.578	4.87481	7.31105	2.43624	1	0.29777	2.17701	0.72544
00000014_4.tif	control	CB1112	cat2(e1112)	DA	6.396	16.708	4.73449	8.73392	3.99944	1	0.29777	2.6007	1.19091
00000014_4.tif	control	CB1112	cat2(e1112)	DA	6.672	16.87	4.73449	8.61379	3.8793	1	0.29777	2.56493	1.15514
00000014_4.tif	control	CB1112	cat2(e1112)	DA	6.901	16.62	4.73449	8.27909	3.5446	1	0.29777	2.46526	1.05548
00000014_4.tif	control	CB1112	cat2(e1112)	DA	8.745	16.729	4.73449	7.00441	2.26992	1	0.29777	2.0857	0.675914
00000014_4.tif	control	CB1112	cat2(e1112)	DA	8.229	16.448	4.73449	7.16145	2.42696	1	0.29777	2.13247	0.722676
00000014_4.tif	control	CB1112	cat2(e1112)	DA	6.703	15.474	4.73449	7.79424	3.05975	1	0.29777	2.32089	0.911103
00000014_4.tif	control	CB1112	cat2(e1112)	DA	7.844	13.682	4.73449	5.97753	1.24304	1	0.29777	1.77993	0.370139
00000014_4.tif	control	CB1112	cat2(e1112)	DA	7.5	13.521	4.73449	6.24533	1.51084	1	0.29777	1.85967	0.449884
00000014_4.tif	control	CB1112	cat2(e1112)	DA	6.104	11.932	4.73449	7.31947	2.58498	1	0.29777	2.17952	0.769729
00000014_4.tif	control	CB1112	cat2(e1112)	DA	8.047	11.323	4.73449	5.36709	0.632598	1	0.29777	1.59816	0.188369
00000014_4.tif	control	CB1112	cat2(e1112)	DA	6.859	10.927	4.73449	6.57745	1.84296	1	0.29777	1.95857	0.548777
00000014_4.tif	control	CB1112	cat2(e1112)	DA	6.88	10.729	4.73449	6.57694	1.84245	1	0.29777	1.95842	0.548627
00000014_4.tif	control	CB1112	cat2(e1112)	DA	4.771	9.083	4.73449	8.97305	4.23856	1	0.29777	2.67191	1.26212
00000014_4.tif	control	CB1112	cat2(e1112)	DA	4.589	8.875	4.73449	9.20568	4.47119	1	0.29777	2.74118	1.33139
00000014_4.tif	control	CB1112	cat2(e1112)	DA	6.885	6.87	4.73449	8.00449	3.27	1	0.29777	2.3835	0.973709
00000014_4.tif	control	CB1112	cat2(e1112)	DA	9.073	5.365	4.73449	7.51784	2.78335	1	0.29777	2.23859	0.828797
00000014_4.tif	control	CB1112	cat2(e1112)	DA	9.208	5.339	4.73449	7.46222	2.72773	1	0.29777	2.22203	0.812237
00000014_4.tif	control	CB1112	cat2(e1112)	DA	10.318	8.807	4.73449	4.10437	-0.630119	0	0.29777	1.22216	-0.18763
00000014_4.tif	control	CB1112	cat2(e1112)	DA	11.328	10.661	4.73449	2.24749	-2.487	0	0.29777	0.669236	-0.740553
00000014_4.tif	control	CB1112	cat2(e1112)	DA	9.219	10.49	4.73449	4.31313	-0.421359	0	0.29777	1.28432	-0.125468
00000014_4.tif	control	CB1112	cat2(e1112)	DA	9.292	10.922	4.73449	4.16005	-0.574435	0	0.29777	1.23874	-0.171049
00000014_4.tif	control	CB1112	cat2(e1112)	DA	13.984	13.188	4.73449	1.77787	-2.95662	0	0.29777	0.529396	-0.880393
00000014_4.tif	control	CB1112	cat2(e1112)	DA	13.339	7.359	4.73449	4.14663	-0.587863	0	0.29777	1.23474	-0.175048
00000014_4.tif	control	CB1112	cat2(e1112)	DA	13.042	7.052	4.73449	4.46826	-0.266226	0	0.29777	1.33051	-0.0792741
00000014_4.tif	control	CB1112	cat2(e1112)	DA	11.984	7.438	4.73449	4.31008	-0.424405	0	0.29777	1.28341	-0.126375
00000014_4.tif	control	CB1112	cat2(e1112)	DA	14.844	6.901	4.73449	4.82186	0.0873684	1	0.29777	1.4358	0.0260157
00000014_4.tif	control	CB1112	cat2(e1112)	DA	16.479	6.255	4.73449	6.08072	1.34623	1	0.29777	1.81066	0.400867
00000014_4.tif	control	CB1112	cat2(e1112)	DA	16.625	6.177	4.73449	6.22233	1.48784	1	0.29777	1.85282	0.443034
00000014_4.tif	control	CB1112	cat2(e1112)	DA	16.771	6.062	4.73449	6.39655	1.66206	1	0.29777	1.9047	0.494912
00000014_4.tif	control	CB1112	cat2(e1112)	DA	16.432	6.854	4.73449	5.54601	0.811523	1	0.29777	1.65144	0.241647
00000014_4.tif	control	CB1112	cat2(e1112)	DA	16.307	7.068	4.73449	5.29847	0.563981	1	0.29777	1.57773	0.167937
00000014_4.tif	control	CB1112	cat2(e1112)	DA	16.25	7.208	4.73449	5.15016	0.41567	1	0.29777	1.53356	0.123774
00000014_4.tif	control	CB1112	cat2(e1112)	DA	16.062	7.49	4.73449	4.81124	0.076751	1	0.29777	1.43264	0.0228541
00000014_4.tif	control	CB1112	cat2(e1112)	DA	15.495	7.781	4.73449	4.26746	-0.467027	0	0.29777	1.27072	-0.139067
00000014_4.tif	control	CB1112	cat2(e1112)	DA	14.359	11.375	4.73449	0.956872	-3.77762	0	0.29777	0.284928	-1.12486
00000014_4.tif	control	CB1112	cat2(e1112)	DA	15.859	11.781	4.73449	2.46351	-2.27098	0	0.29777	0.733559	-0.676229
00000014_4.tif	control	CB1112	cat2(e1112)	DA	15.005	12.536	4.73449	1.89837	-2.83612	0	0.29777	0.565277	-0.844512
00000014_4.tif	control	CB1112	cat2(e1112)	DA	14.958	12.615	4.73449	1.90402	-2.83046	0	0.29777	0.566961	-0.842827
00000014_4.tif	control	CB1112	cat2(e1112)	DA	16.589	14.182	4.73449	4.15524	-0.579249	0	0.29777	1.23731	-0.172483
00000014_4.tif	control	CB1112	cat2(e1112)	DA	14.443	13.943	4.73449	2.64743	-2.08706	0	0.29777	0.788324	-0.621464
00000014_4.tif	control	CB1112	cat2(e1112)	DA	14.391	13.979	4.73449	2.66103	-2.07346	0	0.29777	0.792375	-0.617414
00000014_4.tif	control	CB1112	cat2(e1112)	DA	14.667	15.698	4.73449	4.37707	-0.357414	0	0.29777	1.30336	-0.106427
00000014_4.tif	control	CB1112	cat2(e1112)	DA	18.609	16.052	4.73449	6.90611	2.17163	1	0.29777	2.05643	0.646645
00000014_4.tif	control	CB1112	cat2(e1112)	DA	18.542	13.286	4.73449	5.43131	0.696821	1	0.29777	1.61728	0.207492
00000014_4.tif	control	CB1112	cat2(e1112)	DA	17.167	12.969	4.73449	4.03123	-0.703257	0	0.29777	1.20038	-0.209409
00000014_4.tif	control	CB1112	cat2(e1112)	DA	17.938	11.896	4.73449	4.54385	-0.190634	0	0.29777	1.35302	-0.0567652
00000014_4.tif	control	CB1112	cat2(e1112)	DA	18.125	11.411	4.73449	4.71494	-0.0195515	0	0.29777	1.40397	-0.00582184
00000014_4.tif	control	CB1112	cat2(e1112)	DA	18.161	11.271	4.73449	4.75576	0.0212717	1	0.29777	1.41612	0.00633408
00000014_4.tif	control	CB1112	cat2(e1112)	DA	17.453	9.422	4.73449	4.54716	-0.18733	0	0.29777	1.35401	-0.0557812
00000014_4.tif	control	CB1112	cat2(e1112)	DA	17.401	9.318	4.73449	4.55006	-0.184426	0	0.29777	1.35487	-0.0549165
00000014_4.tif	control	CB1112	cat2(e1112)	DA	17.602	5.175	4.73449	7.59167	2.85718	1	0.29777	2.26057	0.850781
0000017_12.tif	predator	CB1112	cat2(e1112)	DA	4.328	5.927	4.78139	9.71235	4.93097	1	0.29777	2.89205	1.46829
0000017_12.tif	predator	CB1112	cat2(e1112)	DA	6.234	16.573	4.78139	6.6267	1.84532	1	0.29777	1.97323	0.54948
0000017_12.tif	predator	CB1112	cat2(e1112)	DA	8.542	20.719	4.78139	8.71522	3.93383	1	0.29777	2.59513	1.17138
0000017_12.tif	predator	CB1112	cat2(e1112)	DA	7.766	18.984	4.78139	7.45821	2.67682	1	0.29777	2.22083	0.797078
0000017_12.tif	predator	CB1112	cat2(e1112)	DA	7.755	16.583	4.78139	5.51209	0.730703	1	0.29777	1.64133	0.217581
0000017_12.tif	predator	CB1112	cat2(e1112)	DA	7.906	16.516	4.78139	5.36125	0.579864	1	0.29777	1.59642	0.172666
0000017_12.tif	predator	CB1112	cat2(e1112)	DA	6.948	11.557	4.78139	4.62035	-0.161034	0	0.29777	1.3758	-0.0479512
0000017_12.tif	predator	CB1112	cat2(e1112)	DA	7.073	11.583	4.78139	4.49268	-0.288709	0	0.29777	1.33778	-0.085969
0000017_12.tif	predator	CB1112	cat2(e1112)	DA	7.385	10.786	4.78139	4.43297	-0.348415	0	0.29777	1.32001	-0.103748
0000017_12.tif	predator	CB1112	cat2(e1112)	DA	7.391	10.609	4.78139	4.49932	-0.282066	0	0.29777	1.33976	-0.0839907
0000017_12.tif	predator	CB1112	cat2(e1112)	DA	8.115	10.562	4.78139	3.87866	-0.902724	0	0.29777	1.15495	-0.268804
0000017_12.tif	predator	CB1112	cat2(e1112)	DA	9.406	5.13	4.78139	7.66292	2.88154	1	0.29777	2.28179	0.858035
0000017_12.tif	predator	CB1112	cat2(e1112)	DA	7.068	3.859	4.78139	9.70611	4.92473	1	0.29777	2.89019	1.46644
0000017_12.tif	predator	CB1112	cat2(e1112)	DA	8.229	3.292	4.78139	9.77083	4.98944	1	0.29777	2.90946	1.48571
0000017_12.tif	predator	CB1112	cat2(e1112)	DA	11.188	2.594	4.78139	9.91998	5.13859	1	0.29777	2.95387	1.53012
0000017_12.tif	predator	CB1112	cat2(e1112)	DA	11.016	2.891	4.78139	9.62966	4.84827	1	0.29777	2.86742	1.44367
0000017_12.tif	predator	CB1112	cat2(e1112)	DA	10.375	3.625	4.78139	8.9521	4.17071	1	0.29777	2.66567	1.24191
0000017_12.tif	predator	CB1112	cat2(e1112)	DA	12.771	21.74	4.78139	9.32138	4.53999	1	0.29777	2.77563	1.35187
0000017_12.tif	predator	CB1112	cat2(e1112)	DA	16.755	13.484	4.78139	5.37499	0.5936	1	0.29777	1.60051	0.176756
0000017_12.tif	predator	CB1112	cat2(e1112)	DA	18.068	16.095	4.78139	7.50993	2.72854	1	0.29777	2.23623	0.812478
0000017_12.tif	predator	CB1112	cat2(e1112)	DA	17.436	18.325	4.78139	8.33183	3.55044	1	0.29777	2.48097	1.05721
0000017_12.tif	predator	CB1112	cat2(e1112)	DA	17.144	18.797	4.78139	8.46947	3.68809	1	0.29777	2.52196	1.0982
0000017_12.tif	predator	CB1112	cat2(e1112)	DA	17.082	18.957	4.78139	8.54807	3.76669	1	0.29777	2.54536	1.12161
0000017_12.tif	predator	CB1112	cat2(e1112)	DA	15.644	21.026	4.78139	9.48435	4.70296	1	0.29777	2.82415	1.4004
0000017_12.tif	predator	CB1112	cat2(e1112)	DA	19.884	15.234	4.78139	8.84491	4.06352	1	0.29777	2.63375	1.20999
0000017_12.tif	predator	CB1112	cat2(e1112)	DA	21.148	14.734	4.78139	9.93122	5.14984	1	0.29777	2.95722	1.53347
0000017_12.tif	predator	CB1112	cat2(e1112)	DA	21.134	14.609	4.78139	9.8903	5.10891	1	0.29777	2.94503	1.52128
0000017_12.tif	predator	CB1112	cat2(e1112)	DA	21.293	14.401	4.78139	10.0043	5.22296	1	0.29777	2.97899	1.55524
0000017_12.tif	predator	CB1112	cat2(e1112)	DA	20.842	14.033	4.78139	9.49593	4.71454	1	0.29777	2.8276	1.40385
0000017_12.tif	predator	CB1112	cat2(e1112)	DA	21.363	13.568	4.78139	9.95041	5.16902	1	0.29777	2.96293	1.53918
0000017_12.tif	predator	CB1112	cat2(e1112)	DA	21.335	13.352	4.78139	9.90186	5.12048	1	0.29777	2.94848	1.52472
0000017_12.tif	predator	CB1112	cat2(e1112)	DA	22.293	13.352	4.78139	10.8567	6.07531	1	0.29777	3.2328	1.80905
0000017_12.tif	predator	CB1112	cat2(e1112)	DA	22.259	13.193	4.78139	10.8116	6.03021	1	0.29777	3.21937	1.79562
0000017_12.tif	predator	CB1112	cat2(e1112)	DA	21.939	13.068	4.78139	10.4849	5.70347	1	0.29777	3.12208	1.69832
0000017_12.tif	predator	CB1112	cat2(e1112)	DA	22.023	13.061	4.78139	10.5684	5.78699	1	0.29777	3.14694	1.72319
0000017_12.tif	predator	CB1112	cat2(e1112)	DA	21.918	12.957	4.78139	10.4586	5.67717	1	0.29777	3.11424	1.69049
0000017_12.tif	predator	CB1112	cat2(e1112)	DA	21.641	12.797	4.78139	10.176	5.39466	1	0.29777	3.03012	1.60637
0000017_12.tif	predator	CB1112	cat2(e1112)	DA	22.155	11.769	4.78139	10.7117	5.93027	1	0.29777	3.18961	1.76586
0000017_22.tif	control	N2	wt	DA	6.427	15.49	4.95839	7.84046	2.88207	1	0.29777	2.33465	0.858194
0000017_22.tif	control	N2	wt	DA	6.453	15.37	4.95839	7.76321	2.80482	1	0.29777	2.31165	0.835191
0000017_22.tif	control	N2	wt	DA	7.01	15.365	4.95839	7.26619	2.3078	1	0.29777	2.16365	0.687194
0000017_22.tif	control	N2	wt	DA	9.661	19.453	4.95839	8.41524	3.45685	1	0.29777	2.50581	1.02935
0000017_22.tif	control	N2	wt	DA	10.109	18.099	4.95839	7.00624	2.04785	1	0.29777	2.08625	0.609787
0000017_22.tif	control	N2	wt	DA	10.073	17.938	4.95839	6.88196	1.92357	1	0.29777	2.04924	0.572781
0000017_22.tif	control	N2	wt	DA	11.349	16.318	4.95839	4.85799	-0.1004	0	0.29777	1.44656	-0.0298963
0000017_22.tif	control	N2	wt	DA	11.375	16.234	4.95839	4.7709	-0.187493	0	0.29777	1.42063	-0.0558297
0000017_22.tif	control	N2	wt	DA	12.26	15.875	4.95839	4.12057	-0.837821	0	0.29777	1.22698	-0.249478
0000017_22.tif	control	N2	wt	DA	9.891	11.984	4.95839	3.51564	-1.44275	0	0.29777	1.04685	-0.429608
0000017_22.tif	control	N2	wt	DA	9.859	12.078	4.95839	3.55065	-1.40774	0	0.29777	1.05728	-0.419182
0000017_22.tif	control	N2	wt	DA	10.359	10.266	4.95839	3.46555	-1.49284	0	0.29777	1.03194	-0.444524
0000017_22.tif	control	N2	wt	DA	12.49	8.948	4.95839	3.10709	-1.8513	0	0.29777	0.925199	-0.551261
0000017_22.tif	control	N2	wt	DA	13.323	8.656	4.95839	3.26206	-1.69633	0	0.29777	0.971342	-0.505117
0000017_22.tif	control	N2	wt	DA	13.521	8.667	4.95839	3.25203	-1.70635	0	0.29777	0.968358	-0.508101
0000017_22.tif	control	N2	wt	DA	13.526	8.219	4.95839	3.69995	-1.25844	0	0.29777	1.10173	-0.374726
0000017_22.tif	control	N2	wt	DA	13.661	8.667	4.95839	3.25999	-1.6984	0	0.29777	0.970727	-0.505733
0000017_22.tif	control	N2	wt	DA	14.005	8.833	4.95839	3.14163	-1.81676	0	0.29777	0.935484	-0.540975
0000017_22.tif	control	N2	wt	DA	15.156	7.974	4.95839	4.3139	-0.644487	0	0.29777	1.28455	-0.191909
0000017_22.tif	control	N2	wt	DA	15.245	7.927	4.95839	4.39341	-0.564982	0	0.29777	1.30822	-0.168235
0000017_22.tif	control	N2	wt	DA	14.854	7.703	4.95839	4.45584	-0.50255	0	0.29777	1.32682	-0.149644
0000017_22.tif	control	N2	wt	DA	15.917	8.594	4.95839	4.16503	-0.793362	0	0.29777	1.24022	-0.236239
0000017_22.tif	control	N2	wt	DA	14.474	10.036	4.95839	2.16305	-2.79534	0	0.29777	0.644091	-0.832368
0000017_22.tif	control	N2	wt	DA	15.057	10.208	4.95839	2.37623	-2.58216	0	0.29777	0.707571	-0.768889
0000017_22.tif	control	N2	wt	DA	15.182	10.161	4.95839	2.49754	-2.46085	0	0.29777	0.743693	-0.732767
0000017_22.tif	control	N2	wt	DA	13.708	12.031	4.95839	0.3228	-4.63559	0	0.29777	0.0961202	-1.38034
0000017_22.tif	control	N2	wt	DA	15.255	16.615	4.95839	5.04876	0.090374	1	0.29777	1.50337	0.0269107
0000017_22.tif	control	N2	wt	DA	15.078	16.615	4.95839	4.98666	0.0282723	1	0.29777	1.48488	0.00841863
0000017_22.tif	control	N2	wt	DA	18.068	19.885	4.95839	9.23164	4.27326	1	0.29777	2.74891	1.27245
0000017_22.tif	control	N2	wt	DA	18.052	19.724	4.95839	9.08485	4.12646	1	0.29777	2.7052	1.22874
0000017_22.tif	control	N2	wt	DA	16.964	9.708	4.95839	4.18796	-0.770424	0	0.29777	1.24705	-0.229409
0000017_22.tif	control	N2	wt	DA	19.542	6.734	4.95839	8.03206	3.07367	1	0.29777	2.39171	0.915247
0000018_20.tif	control	N2	wt	DA	3.786	13.448	4.79179	8.53963	3.74783	1	0.29777	2.54284	1.11599
0000018_20.tif	control	N2	wt	DA	3.755	13.276	4.79179	8.54626	3.75447	1	0.29777	2.54482	1.11797
0000018_20.tif	control	N2	wt	DA	7.411	19.807	4.79179	9.03232	4.24052	1	0.29777	2.68955	1.2627
0000018_20.tif	control	N2	wt	DA	7.464	19.661	4.79179	8.88061	4.08882	1	0.29777	2.64438	1.21753
0000018_20.tif	control	N2	wt	DA	8.234	14.026	4.79179	4.40635	-0.385445	0	0.29777	1.31208	-0.114774
0000018_20.tif	control	N2	wt	DA	9.207	14.158	4.79179	3.61892	-1.17288	0	0.29777	1.07761	-0.349247
0000018_20.tif	control	N2	wt	DA	9.991	13.651	4.79179	2.68531	-2.10648	0	0.29777	0.799605	-0.627247
0000018_20.tif	control	N2	wt	DA	12.227	14.832	4.79179	2.665	-2.12679	0	0.29777	0.793557	-0.633295
0000018_20.tif	control	N2	wt	DA	8.186	11.429	4.79179	4.1098	-0.681989	0	0.29777	1.22378	-0.203076
0000018_20.tif	control	N2	wt	DA	8.917	9.839	4.79179	4.04832	-0.743469	0	0.29777	1.20547	-0.221383
0000018_20.tif	control	N2	wt	DA	8.833	9.76	4.79179	4.16251	-0.629286	0	0.29777	1.23947	-0.187383
0000018_20.tif	control	N2	wt	DA	11.646	8.271	4.79179	3.93938	-0.852415	0	0.29777	1.17303	-0.253823
0000018_20.tif	control	N2	wt	DA	9.05	5.818	4.79179	7.10041	2.30862	1	0.29777	2.11429	0.687437
0000018_20.tif	control	N2	wt	DA	15.675	3.384	4.79179	9.43483	4.64304	1	0.29777	2.80941	1.38256
0000018_20.tif	control	N2	wt	DA	14.557	7.363	4.79179	5.33835	0.546558	1	0.29777	1.5896	0.162749
0000018_20.tif	control	N2	wt	DA	14.411	7.391	4.79179	5.25084	0.459045	1	0.29777	1.56354	0.13669
0000018_20.tif	control	N2	wt	DA	12.78	9.293	4.79179	2.92634	-1.86545	0	0.29777	0.871377	-0.555475
0000018_20.tif	control	N2	wt	DA	12.911	9.356	4.79179	2.89255	-1.89924	0	0.29777	0.861315	-0.565538
0000018_20.tif	control	N2	wt	DA	13.036	10.627	4.79179	1.73863	-3.05316	0	0.29777	0.517713	-0.909139
0000018_20.tif	control	N2	wt	DA	14.328	9.536	4.79179	3.3657	-1.42609	0	0.29777	1.00221	-0.424647
0000018_20.tif	control	N2	wt	DA	14.307	9.627	4.79179	3.28172	-1.51007	0	0.29777	0.977198	-0.449655
0000018_20.tif	control	N2	wt	DA	14.786	11.05	4.79179	2.79033	-2.00146	0	0.29777	0.830876	-0.595976
0000018_20.tif	control	N2	wt	DA	16.092	13.352	4.79179	4.04067	-0.751126	0	0.29777	1.20319	-0.223663
0000018_20.tif	control	N2	wt	DA	13.432	13.762	4.79179	1.99781	-2.79399	0	0.29777	0.594887	-0.831965
0000018_20.tif	control	N2	wt	DA	13.453	13.839	4.79179	2.07214	-2.71965	0	0.29777	0.617021	-0.809831
0000018_20.tif	control	N2	wt	DA	14.37	14.429	4.79179	3.11457	-1.67723	0	0.29777	0.927424	-0.499428
0000018_20.tif	control	N2	wt	DA	15.439	15.047	4.79179	4.3126	-0.479196	0	0.29777	1.28416	-0.14269
0000018_20.tif	control	N2	wt	DA	14.335	15.227	4.79179	3.71468	-1.07711	0	0.29777	1.10612	-0.320733
0000018_20.tif	control	N2	wt	DA	19.755	12.88	4.79179	7.5597	2.76791	1	0.29777	2.25105	0.824199
0000018_20.tif	control	N2	wt	DA	20.366	13.012	4.79179	8.18076	3.38896	1	0.29777	2.43598	1.00913
0000018_20.tif	control	N2	wt	DA	20.075	10.429	4.79179	8.03619	3.2444	1	0.29777	2.39294	0.966084
0000018_20.tif	control	N2	wt	DA	20.408	9.13	4.79179	8.72464	3.93285	1	0.29777	2.59794	1.17108
0000018_20.tif	control	N2	wt	DA	18.026	6.911	4.79179	7.82501	3.03321	1	0.29777	2.33005	0.9032
0000018_20.tif	control	N2	wt	DA	18.13	6.884	4.79179	7.92035	3.12855	1	0.29777	2.35844	0.931589
0000018_20.tif	control	N2	wt	DA	18.262	6.759	4.79179	8.10207	3.31028	1	0.29777	2.41255	0.985701
0000018_20.tif	control	N2	wt	DA	18.332	6.536	4.79179	8.3039	3.51211	1	0.29777	2.47265	1.0458
0000018_20.tif	control	N2	wt	DA	18.415	6.391	4.79179	8.46338	3.67158	1	0.29777	2.52014	1.09329
0000018_20.tif	control	N2	wt	DA	18.38	6.286	4.79179	8.51005	3.71826	1	0.29777	2.53404	1.10719
0000018_20.tif	control	N2	wt	DA	18.339	6.12	4.79179	8.59641	3.80462	1	0.29777	2.55975	1.1329
00000022_2.tif	control	CB1112	cat2(e1112)	VEH	13.115	16.302	4.6825	4.39302	-0.289479	0	0.29777	1.30811	-0.0861983
00000022_2.tif	control	CB1112	cat2(e1112)	VEH	12.252	14.818	4.6825	3.13516	-1.54734	0	0.29777	0.933556	-0.460752
00000022_2.tif	control	CB1112	cat2(e1112)	VEH	11.946	14.498	4.6825	2.98443	-1.69807	0	0.29777	0.888674	-0.505635
00000022_2.tif	control	CB1112	cat2(e1112)	VEH	11.918	14.464	4.6825	2.96951	-1.71299	0	0.29777	0.884231	-0.510078
00000022_2.tif	control	CB1112	cat2(e1112)	VEH	9.877	12.658	4.6825	3.65095	-1.03155	0	0.29777	1.08714	-0.307164
00000022_2.tif	control	CB1112	cat2(e1112)	VEH	10.085	12.373	4.6825	3.39806	-1.28444	0	0.29777	1.01184	-0.382468
00000022_2.tif	control	CB1112	cat2(e1112)	VEH	9.391	11.755	4.6825	4.06543	-0.61707	0	0.29777	1.21056	-0.183745
00000022_2.tif	control	CB1112	cat2(e1112)	VEH	9.8	11.651	4.6825	3.66304	-1.01946	0	0.29777	1.09074	-0.303566
00000022_2.tif	control	CB1112	cat2(e1112)	VEH	9.759	11.575	4.6825	3.71026	-0.97224	0	0.29777	1.1048	-0.289504
00000022_2.tif	control	CB1112	cat2(e1112)	VEH	10.585	11.13	4.6825	2.97535	-1.70715	0	0.29777	0.885969	-0.50834
00000022_2.tif	control	CB1112	cat2(e1112)	VEH	9.925	10.575	4.6825	3.7764	-0.906102	0	0.29777	1.1245	-0.26981
00000022_2.tif	control	CB1112	cat2(e1112)	VEH	10.814	10.679	4.6825	2.91708	-1.76542	0	0.29777	0.86862	-0.525689
00000022_2.tif	control	CB1112	cat2(e1112)	VEH	10.175	9.915	4.6825	3.84361	-0.838892	0	0.29777	1.14451	-0.249797
00000022_2.tif	control	CB1112	cat2(e1112)	VEH	10.21	10.04	4.6825	3.74953	-0.932972	0	0.29777	1.1165	-0.277811
00000022_2.tif	control	CB1112	cat2(e1112)	VEH	11.53	9.887	4.6825	2.79985	-1.88265	0	0.29777	0.833711	-0.560597
00000022_2.tif	control	CB1112	cat2(e1112)	VEH	13.918	11.707	4.6825	0.512299	-4.1702	0	0.29777	0.152547	-1.24176
00000022_2.tif	control	CB1112	cat2(e1112)	VEH	13.939	9.422	4.6825	2.5468	-2.1357	0	0.29777	0.758361	-0.635948
00000022_2.tif	control	CB1112	cat2(e1112)	VEH	13.148	8.373	4.6825	3.56208	-1.12042	0	0.29777	1.06068	-0.333627
00000022_2.tif	control	CB1112	cat2(e1112)	VEH	12.134	9.491	4.6825	2.76578	-1.91672	0	0.29777	0.823565	-0.570743
00000022_2.tif	control	CB1112	cat2(e1112)	VEH	14.182	9.839	4.6825	2.20688	-2.47562	0	0.29777	0.657143	-0.737165
00000022_2.tif	control	CB1112	cat2(e1112)	VEH	14.203	9.984	4.6825	2.07806	-2.60444	0	0.29777	0.618785	-0.775524
00000022_2.tif	control	CB1112	cat2(e1112)	VEH	15.036	11.125	4.6825	1.77231	-2.91019	0	0.29777	0.527742	-0.866566
00000022_2.tif	control	CB1112	cat2(e1112)	VEH	14.938	11.177	4.6825	1.6614	-3.0211	0	0.29777	0.494715	-0.899593
00000022_2.tif	control	CB1112	cat2(e1112)	VEH	14.922	14.88	4.6825	3.30268	-1.37982	0	0.29777	0.98344	-0.410868
00000022_2.tif	control	CB1112	cat2(e1112)	VEH	15.214	14.495	4.6825	3.11792	-1.56458	0	0.29777	0.928424	-0.465884
00000022_2.tif	control	CB1112	cat2(e1112)	VEH	15.307	14.745	4.6825	3.37737	-1.30513	0	0.29777	1.00568	-0.388628
00000022_2.tif	control	CB1112	cat2(e1112)	VEH	16.198	15.344	4.6825	4.38692	-0.295577	0	0.29777	1.30629	-0.0880139
00000022_2.tif	control	CB1112	cat2(e1112)	VEH	16.26	15.307	4.6825	4.39744	-0.285062	0	0.29777	1.30943	-0.084883
00000023_6.tif	control	CB1112	cat2(e1112)	VEH	9.203	9.521	5.06773	4.11423	-0.953496	0	0.29777	1.2251	-0.283923
00000023_6.tif	control	CB1112	cat2(e1112)	VEH	9.682	9.365	5.06773	3.73833	-1.3294	0	0.29777	1.11316	-0.395855
00000023_6.tif	control	CB1112	cat2(e1112)	VEH	9.755	9.344	5.06773	3.68246	-1.38526	0	0.29777	1.09653	-0.41249
00000023_6.tif	control	CB1112	cat2(e1112)	VEH	10.188	8.792	5.06773	3.61349	-1.45424	0	0.29777	1.07599	-0.43303
00000023_6.tif	control	CB1112	cat2(e1112)	VEH	10.094	8.729	5.06773	3.72636	-1.34137	0	0.29777	1.1096	-0.399421
00000023_6.tif	control	CB1112	cat2(e1112)	VEH	10.047	8.651	5.06773	3.81148	-1.25625	0	0.29777	1.13494	-0.374075
00000023_6.tif	control	CB1112	cat2(e1112)	VEH	10.042	9.521	5.06773	3.3465	-1.72123	0	0.29777	0.996487	-0.51253
00000023_6.tif	control	CB1112	cat2(e1112)	VEH	10.562	9.021	5.06773	3.17816	-1.88957	0	0.29777	0.946361	-0.562657
00000023_6.tif	control	CB1112	cat2(e1112)	VEH	11	8.875	5.06773	2.95452	-2.11321	0	0.29777	0.879767	-0.629251
00000023_6.tif	control	CB1112	cat2(e1112)	VEH	11.354	9.552	5.06773	2.22989	-2.83784	0	0.29777	0.663995	-0.845023
00000023_6.tif	control	CB1112	cat2(e1112)	VEH	10.354	10.245	5.06773	2.79062	-2.27711	0	0.29777	0.830963	-0.678055
00000023_6.tif	control	CB1112	cat2(e1112)	VEH	10.417	10.208	5.06773	2.74081	-2.32692	0	0.29777	0.81613	-0.692887
00000023_6.tif	control	CB1112	cat2(e1112)	VEH	10.906	10.823	5.06773	2.13873	-2.929	0	0.29777	0.636848	-0.872169
00000023_6.tif	control	CB1112	cat2(e1112)	VEH	11.365	11.172	5.06773	1.67827	-3.38946	0	0.29777	0.499737	-1.00928
00000023_6.tif	control	CB1112	cat2(e1112)	VEH	11.24	7.536	5.06773	3.91612	-1.15161	0	0.29777	1.1661	-0.342914
00000023_6.tif	control	CB1112	cat2(e1112)	VEH	10.115	7.781	5.06773	4.35861	-0.709121	0	0.29777	1.29786	-0.211155
00000023_6.tif	control	CB1112	cat2(e1112)	VEH	9.828	11.307	5.06773	3.22117	-1.84656	0	0.29777	0.959168	-0.549849
00000023_6.tif	control	CB1112	cat2(e1112)	VEH	10.453	11.234	5.06773	2.59218	-2.47555	0	0.29777	0.771874	-0.737143
00000023_6.tif	control	CB1112	cat2(e1112)	VEH	9.411	11.771	5.06773	3.70279	-1.36494	0	0.29777	1.10258	-0.406438
00000023_6.tif	control	CB1112	cat2(e1112)	VEH	11.198	13.432	5.06773	3.03567	-2.03206	0	0.29777	0.903932	-0.605086
00000023_6.tif	control	CB1112	cat2(e1112)	VEH	10.385	13.714	5.06773	3.78246	-1.28527	0	0.29777	1.1263	-0.382715
00000023_6.tif	control	CB1112	cat2(e1112)	VEH	13.625	13.349	5.06773	2.4062	-2.66153	0	0.29777	0.716495	-0.792523
00000023_6.tif	control	CB1112	cat2(e1112)	VEH	13.719	13.411	5.06773	2.49048	-2.57724	0	0.29777	0.741592	-0.767426
00000023_6.tif	control	CB1112	cat2(e1112)	VEH	13.458	11.802	5.06773	0.892121	-4.17561	0	0.29777	0.265647	-1.24337
00000023_6.tif	control	CB1112	cat2(e1112)	VEH	13.406	10.375	5.06773	0.740122	-4.32761	0	0.29777	0.220386	-1.28863
00000023_6.tif	control	CB1112	cat2(e1112)	VEH	13.766	9.745	5.06773	1.46572	-3.60201	0	0.29777	0.436448	-1.07257
00000023_6.tif	control	CB1112	cat2(e1112)	VEH	13.849	9.729	5.06773	1.52228	-3.54545	0	0.29777	0.453289	-1.05573
00000023_6.tif	control	CB1112	cat2(e1112)	VEH	12.995	8.281	5.06773	2.73531	-2.33242	0	0.29777	0.814492	-0.694525
00000023_6.tif	control	CB1112	cat2(e1112)	VEH	14.771	10.875	5.06773	1.74072	-3.32701	0	0.29777	0.518334	-0.990684
00000023_6.tif	control	CB1112	cat2(e1112)	VEH	15.214	11.438	5.06773	2.21851	-2.84922	0	0.29777	0.660604	-0.848413
00000023_6.tif	control	CB1112	cat2(e1112)	VEH	15.333	11.646	5.06773	2.38183	-2.6859	0	0.29777	0.709237	-0.79978
00000023_6.tif	control	CB1112	cat2(e1112)	VEH	15.844	11.224	5.06773	2.81569	-2.25204	0	0.29777	0.838429	-0.670589
00000023_6.tif	control	CB1112	cat2(e1112)	VEH	16.01	11.708	5.06773	3.05345	-2.01428	0	0.29777	0.909225	-0.599793
00000023_6.tif	control	CB1112	cat2(e1112)	VEH	15.714	11.818	5.06773	2.79551	-2.27222	0	0.29777	0.83242	-0.676598
00000023_6.tif	control	CB1112	cat2(e1112)	VEH	14.859	12.531	5.06773	2.37035	-2.69738	0	0.29777	0.705819	-0.803199
0000023_14.tif	predator	CB1112	cat2(e1112)	VEH	4.177	7.604	4.96352	10.5333	5.56974	1	0.29777	3.13649	1.6585
0000023_14.tif	predator	CB1112	cat2(e1112)	VEH	10.281	15.094	4.96352	4.54754	-0.415983	0	0.29777	1.35412	-0.123867
0000023_14.tif	predator	CB1112	cat2(e1112)	VEH	11.745	15.026	4.96352	3.52152	-1.442	0	0.29777	1.0486	-0.429385
0000023_14.tif	predator	CB1112	cat2(e1112)	VEH	12.38	14.031	4.96352	2.34157	-2.62195	0	0.29777	0.697249	-0.780738
0000023_14.tif	predator	CB1112	cat2(e1112)	VEH	11.719	13.562	4.96352	2.46508	-2.49844	0	0.29777	0.734027	-0.743961
0000023_14.tif	predator	CB1112	cat2(e1112)	VEH	11.74	12.938	4.96352	2.13478	-2.82874	0	0.29777	0.635674	-0.842314
0000023_14.tif	predator	CB1112	cat2(e1112)	VEH	10.026	11.724	4.96352	3.69607	-1.26745	0	0.29777	1.10058	-0.377408
0000023_14.tif	predator	CB1112	cat2(e1112)	VEH	12.802	12.177	4.96352	0.90437	-4.05915	0	0.29777	0.269294	-1.20869
0000023_14.tif	predator	CB1112	cat2(e1112)	VEH	12.297	11.964	4.96352	1.41247	-3.55106	0	0.29777	0.42059	-1.0574
0000023_14.tif	predator	CB1112	cat2(e1112)	VEH	9.828	10.281	4.96352	4.28027	-0.683247	0	0.29777	1.27454	-0.203451
0000023_14.tif	predator	CB1112	cat2(e1112)	VEH	14.828	11.609	4.96352	1.22708	-3.73644	0	0.29777	0.365388	-1.1126
0000023_14.tif	predator	CB1112	cat2(e1112)	VEH	14.516	11.682	4.96352	0.913706	-4.04982	0	0.29777	0.272074	-1.20591
0000023_14.tif	predator	CB1112	cat2(e1112)	VEH	15.724	11.052	4.96352	2.2761	-2.68742	0	0.29777	0.677756	-0.800232
0000023_14.tif	predator	CB1112	cat2(e1112)	VEH	14.339	13.094	4.96352	1.1809	-3.78262	0	0.29777	0.351636	-1.12635
0000023_14.tif	predator	CB1112	cat2(e1112)	VEH	15.089	13.26	4.96352	1.80801	-3.15551	0	0.29777	0.538373	-0.939615
0000023_14.tif	predator	CB1112	cat2(e1112)	VEH	14.922	13.818	4.96352	2.10735	-2.85617	0	0.29777	0.627505	-0.850482
0000023_14.tif	predator	CB1112	cat2(e1112)	VEH	14.552	13.667	4.96352	1.78309	-3.18043	0	0.29777	0.530952	-0.947036
0000023_14.tif	predator	CB1112	cat2(e1112)	VEH	15.948	17.568	4.96352	5.91185	0.94833	1	0.29777	1.76037	0.282384
0000023_14.tif	predator	CB1112	cat2(e1112)	VEH	16.104	17.594	4.96352	5.99665	1.03313	1	0.29777	1.78562	0.307635
0000023_14.tif	predator	CB1112	cat2(e1112)	VEH	15.974	11.464	4.96352	2.35811	-2.60542	0	0.29777	0.702173	-0.775815
0000023_14.tif	predator	CB1112	cat2(e1112)	VEH	17.443	10.031	4.96352	4.27367	-0.689855	0	0.29777	1.27257	-0.205418
0000023_14.tif	predator	CB1112	cat2(e1112)	VEH	17.042	9.896	4.96352	4.00027	-0.963256	0	0.29777	1.19116	-0.286829
0000030_10.tif	predator	CB1112	cat2(e1112)	DA	5.49	16.172	5.03132	7.97852	2.9472	1	0.29777	2.37576	0.877586
0000030_10.tif	predator	CB1112	cat2(e1112)	DA	5.005	16.193	5.03132	8.41408	3.38275	1	0.29777	2.50546	1.00728
0000030_10.tif	predator	CB1112	cat2(e1112)	DA	4.771	16.458	5.03132	8.74586	3.71454	1	0.29777	2.60426	1.10608
0000030_10.tif	predator	CB1112	cat2(e1112)	DA	4.859	16.682	5.03132	8.77974	3.74842	1	0.29777	2.61434	1.11617
0000030_10.tif	predator	CB1112	cat2(e1112)	DA	4.792	17.224	5.03132	9.12151	4.09019	1	0.29777	2.71611	1.21794
0000030_10.tif	predator	CB1112	cat2(e1112)	DA	10.134	16.536	5.03132	4.86603	-0.165299	0	0.29777	1.44896	-0.049221
0000030_10.tif	predator	CB1112	cat2(e1112)	DA	4.938	18.104	5.03132	9.51416	4.48284	1	0.29777	2.83303	1.33485
0000030_10.tif	predator	CB1112	cat2(e1112)	DA	10.083	16.323	5.03132	4.70482	-0.326502	0	0.29777	1.40095	-0.0972226
0000030_10.tif	predator	CB1112	cat2(e1112)	DA	10.286	16.281	5.03132	4.56947	-0.461854	0	0.29777	1.36065	-0.137526
0000030_10.tif	predator	CB1112	cat2(e1112)	DA	10.714	13.052	5.03132	1.90142	-3.12991	0	0.29777	0.566184	-0.931993
0000030_10.tif	predator	CB1112	cat2(e1112)	DA	10.646	12.974	5.03132	1.93273	-3.0986	0	0.29777	0.575509	-0.922669
0000030_10.tif	predator	CB1112	cat2(e1112)	DA	8.104	12.323	5.03132	4.33461	-0.69671	0	0.29777	1.29072	-0.207459
0000030_10.tif	predator	CB1112	cat2(e1112)	DA	8.109	12.208	5.03132	4.3292	-0.702121	0	0.29777	1.28911	-0.209071
0000030_10.tif	predator	CB1112	cat2(e1112)	DA	10.333	6.531	5.03132	6.09409	1.06277	1	0.29777	1.81464	0.316461
0000030_10.tif	predator	CB1112	cat2(e1112)	DA	9.854	2.417	5.03132	10.1669	5.13553	1	0.29777	3.02738	1.52921
0000030_10.tif	predator	CB1112	cat2(e1112)	DA	13.281	1.49	5.03132	10.793	5.76165	1	0.29777	3.21382	1.71565
0000030_10.tif	predator	CB1112	cat2(e1112)	DA	11.208	5	5.03132	7.3536	2.32227	1	0.29777	2.18968	0.691503
0000030_10.tif	predator	CB1112	cat2(e1112)	DA	12.51	9.161	5.03132	3.08984	-1.94149	0	0.29777	0.920061	-0.578116
0000030_10.tif	predator	CB1112	cat2(e1112)	DA	13.073	10.266	5.03132	2.08314	-2.94818	0	0.29777	0.620297	-0.87788
0000030_10.tif	predator	CB1112	cat2(e1112)	DA	12.307	11.771	5.03132	0.49659	-4.53473	0	0.29777	0.14787	-1.35031
0000030_10.tif	predator	CB1112	cat2(e1112)	DA	12.635	11.88	5.03132	0.419177	-4.61215	0	0.29777	0.124818	-1.37336
0000030_10.tif	predator	CB1112	cat2(e1112)	DA	12.984	11.927	5.03132	0.634386	-4.39694	0	0.29777	0.188901	-1.30928
0000030_10.tif	predator	CB1112	cat2(e1112)	DA	13.708	12.948	5.03132	1.44917	-3.58215	0	0.29777	0.43152	-1.06666
0000030_10.tif	predator	CB1112	cat2(e1112)	DA	13.385	15.203	5.03132	3.10113	-1.93019	0	0.29777	0.923424	-0.574754
0000030_10.tif	predator	CB1112	cat2(e1112)	DA	14.229	14.318	5.03132	2.73575	-2.29558	0	0.29777	0.814623	-0.683555
0000030_10.tif	predator	CB1112	cat2(e1112)	DA	14.276	14.271	5.03132	2.73179	-2.29953	0	0.29777	0.813446	-0.684732
0000030_10.tif	predator	CB1112	cat2(e1112)	DA	14.911	9.479	5.03132	3.71405	-1.31727	0	0.29777	1.10593	-0.392245
0000030_10.tif	predator	CB1112	cat2(e1112)	DA	15.089	2.604	5.03132	10.0037	4.97233	1	0.29777	2.97879	1.48061
0000030_10.tif	predator	CB1112	cat2(e1112)	DA	20.429	11.911	5.03132	7.99819	2.96686	1	0.29777	2.38162	0.883443
0000030_10.tif	predator	CB1112	cat2(e1112)	DA	18.679	10.023	5.03132	6.62643	1.59511	1	0.29777	1.97315	0.474975
0000030_32.tif	predator	N2	wt	VEH	5.854	5.948	4.7971	7.97551	3.1784	1	0.29777	2.37487	0.946433
0000030_32.tif	predator	N2	wt	VEH	10.099	3.505	4.7971	7.81468	3.01757	1	0.29777	2.32698	0.898542
0000030_32.tif	predator	N2	wt	VEH	11.552	6.443	4.7971	4.67239	-0.124716	0	0.29777	1.3913	-0.0371366
0000030_32.tif	predator	N2	wt	VEH	10.406	9.312	4.7971	2.35706	-2.44004	0	0.29777	0.701862	-0.726572
0000030_32.tif	predator	N2	wt	VEH	9.219	9.521	4.7971	3.14806	-1.64905	0	0.29777	0.937397	-0.491037
0000030_32.tif	predator	N2	wt	VEH	9.318	9.344	4.7971	3.15763	-1.63947	0	0.29777	0.940249	-0.488185
0000030_32.tif	predator	N2	wt	VEH	9.99	11.719	4.7971	2.04905	-2.74805	0	0.29777	0.610146	-0.818288
0000030_32.tif	predator	N2	wt	VEH	9.271	12.109	4.7971	2.85652	-1.94059	0	0.29777	0.850585	-0.577849
0000030_32.tif	predator	N2	wt	VEH	9.901	12.177	4.7971	2.30908	-2.48803	0	0.29777	0.687575	-0.740859
0000030_32.tif	predator	N2	wt	VEH	10.047	12.26	4.7971	2.22323	-2.57388	0	0.29777	0.66201	-0.766424
0000030_32.tif	predator	N2	wt	VEH	10.281	12.578	4.7971	2.22479	-2.57232	0	0.29777	0.662475	-0.765959
0000030_32.tif	predator	N2	wt	VEH	10.526	13.312	4.7971	2.62779	-2.16932	0	0.29777	0.782476	-0.645958
0000030_32.tif	predator	N2	wt	VEH	11.568	20.172	4.7971	9.08075	4.28364	1	0.29777	2.70397	1.27554
0000030_32.tif	predator	N2	wt	VEH	12.417	16.932	4.7971	5.85223	1.05512	1	0.29777	1.74262	0.314184
0000030_32.tif	predator	N2	wt	VEH	12.99	16.583	4.7971	5.58305	0.785947	1	0.29777	1.66247	0.234031
0000030_32.tif	predator	N2	wt	VEH	12.896	15.464	4.7971	4.46782	-0.329283	0	0.29777	1.33038	-0.0980505
0000030_32.tif	predator	N2	wt	VEH	14.734	14.375	4.7971	4.3037	-0.493402	0	0.29777	1.28151	-0.14692
0000030_32.tif	predator	N2	wt	VEH	14.932	14.234	4.7971	4.33155	-0.465552	0	0.29777	1.28981	-0.138628
0000030_32.tif	predator	N2	wt	VEH	14.844	14.182	4.7971	4.23328	-0.563821	0	0.29777	1.26054	-0.167889
0000030_32.tif	predator	N2	wt	VEH	15.589	13.964	4.7971	4.63698	-0.160129	0	0.29777	1.38075	-0.0476817
0000030_32.tif	predator	N2	wt	VEH	15.635	13.839	4.7971	4.59766	-0.199446	0	0.29777	1.36904	-0.0593891
0000030_32.tif	predator	N2	wt	VEH	15.411	13.562	4.7971	4.25363	-0.543472	0	0.29777	1.2666	-0.16183
0000030_32.tif	predator	N2	wt	VEH	15.13	13.688	4.7971	4.10608	-0.691025	0	0.29777	1.22267	-0.205767
0000030_32.tif	predator	N2	wt	VEH	13.823	13.724	4.7971	3.22878	-1.56832	0	0.29777	0.961434	-0.467
0000030_32.tif	predator	N2	wt	VEH	14.979	11.016	4.7971	3.03713	-1.75997	0	0.29777	0.904367	-0.524066
0000030_32.tif	predator	N2	wt	VEH	15.073	9.958	4.7971	3.33148	-1.46562	0	0.29777	0.992016	-0.436418
0000030_32.tif	predator	N2	wt	VEH	15.604	9.031	4.7971	4.20471	-0.5924	0	0.29777	1.25204	-0.176399
0000030_32.tif	predator	N2	wt	VEH	14.203	7.141	4.7971	4.55778	-0.239324	0	0.29777	1.35717	-0.0712635
0000030_32.tif	predator	N2	wt	VEH	14.266	7.078	4.7971	4.64379	-0.153316	0	0.29777	1.38278	-0.045653
0000030_32.tif	predator	N2	wt	VEH	16.276	9.182	4.7971	4.73812	-0.058985	0	0.29777	1.41087	-0.017564
0000030_32.tif	predator	N2	wt	VEH	18.38	10.766	4.7971	6.44561	1.6485	1	0.29777	1.91931	0.490875
0000030_32.tif	predator	N2	wt	VEH	20.297	12.036	4.7971	8.40638	3.60928	1	0.29777	2.50317	1.07473
0000030_32.tif	predator	N2	wt	VEH	22.193	10.328	4.7971	10.279	5.48185	1	0.29777	3.06076	1.63233
0000031_18.tif	control	N2	wt	VEH	11.396	7.13	4.98429	4.98276	-0.00153212	0	0.29777	1.48372	-0.000456219
0000031_18.tif	control	N2	wt	VEH	11.677	7.182	4.98429	4.91781	-0.0664831	0	0.29777	1.46437	-0.0197967
0000031_18.tif	control	N2	wt	VEH	11.292	7.484	4.98429	4.63928	-0.34501	0	0.29777	1.38144	-0.102734
0000031_18.tif	control	N2	wt	VEH	10.448	10.891	4.98429	1.78784	-3.19644	0	0.29777	0.532366	-0.951805
0000031_18.tif	control	N2	wt	VEH	10.521	10.932	4.98429	1.70643	-3.27786	0	0.29777	0.508125	-0.976047
0000031_18.tif	control	N2	wt	VEH	10.734	11.318	4.98429	1.29421	-3.69008	0	0.29777	0.385378	-1.09879
0000031_18.tif	control	N2	wt	VEH	11.005	11.333	4.98429	1.07976	-3.90453	0	0.29777	0.321519	-1.16265
0000031_18.tif	control	N2	wt	VEH	11.526	11.453	4.98429	0.689141	-4.29515	0	0.29777	0.205206	-1.27897
0000031_18.tif	control	N2	wt	VEH	9.802	11.745	4.98429	1.99565	-2.98864	0	0.29777	0.594244	-0.889927
0000031_18.tif	control	N2	wt	VEH	8.844	12.932	4.98429	3.03842	-1.94587	0	0.29777	0.904749	-0.579422
0000031_18.tif	control	N2	wt	VEH	11.297	13.234	4.98429	1.22808	-3.75621	0	0.29777	0.365686	-1.11849
0000031_18.tif	control	N2	wt	VEH	11.297	13.328	4.98429	1.31545	-3.66884	0	0.29777	0.391701	-1.09247
0000031_18.tif	control	N2	wt	VEH	10.969	14.036	4.98429	2.09456	-2.88973	0	0.29777	0.623697	-0.860475
0000031_18.tif	control	N2	wt	VEH	10.938	14.068	4.98429	2.13601	-2.84828	0	0.29777	0.63604	-0.848131
0000031_18.tif	control	N2	wt	VEH	11.01	14.109	4.98429	2.14747	-2.83682	0	0.29777	0.639453	-0.844719
0000031_18.tif	control	N2	wt	VEH	11.49	13.812	4.98429	1.73509	-3.2492	0	0.29777	0.516658	-0.967513
0000031_18.tif	control	N2	wt	VEH	10.073	14.365	4.98429	2.8286	-2.15568	0	0.29777	0.842274	-0.641898
0000031_18.tif	control	N2	wt	VEH	12.703	15.031	4.98429	3.07808	-1.90621	0	0.29777	0.916561	-0.567611
0000031_18.tif	control	N2	wt	VEH	13.63	15.083	4.98429	3.51835	-1.46594	0	0.29777	1.04766	-0.436514
0000031_18.tif	control	N2	wt	VEH	13.719	15.036	4.98429	3.52706	-1.45722	0	0.29777	1.05025	-0.433918
0000031_18.tif	control	N2	wt	VEH	13.526	14.438	4.98429	2.9272	-2.05708	0	0.29777	0.871633	-0.612538
0000031_18.tif	control	N2	wt	VEH	12.521	13.542	4.98429	1.62858	-3.35571	0	0.29777	0.484942	-0.999229
0000031_18.tif	control	N2	wt	VEH	12.036	12.286	4.98429	0.328434	-4.65585	0	0.29777	0.0977978	-1.38637
0000031_18.tif	control	N2	wt	VEH	14.312	12.609	4.98429	2.59658	-2.38771	0	0.29777	0.773183	-0.710989
0000031_18.tif	control	N2	wt	VEH	14.229	12.516	4.98429	2.49805	-2.48624	0	0.29777	0.743845	-0.740327
0000031_18.tif	control	N2	wt	VEH	13.406	11.922	4.98429	1.64952	-3.33476	0	0.29777	0.491179	-0.992993
0000031_18.tif	control	N2	wt	VEH	13.208	11.74	4.98429	1.48602	-3.49827	0	0.29777	0.442491	-1.04168
0000031_18.tif	control	N2	wt	VEH	13.104	11.479	4.98429	1.47467	-3.50962	0	0.29777	0.439112	-1.04506
0000031_18.tif	control	N2	wt	VEH	13.406	11.479	4.98429	1.75328	-3.23101	0	0.29777	0.522075	-0.962097
0000031_18.tif	control	N2	wt	VEH	13.422	11.38	4.98429	1.80535	-3.17894	0	0.29777	0.53758	-0.946592
0000031_18.tif	control	N2	wt	VEH	11.88	11.401	4.98429	0.707248	-4.27704	0	0.29777	0.210597	-1.27357
0000031_18.tif	control	N2	wt	VEH	13.724	10.625	4.98429	2.4508	-2.53348	0	0.29777	0.729776	-0.754396
0000031_18.tif	control	N2	wt	VEH	14.927	10.255	4.98429	3.65954	-1.32475	0	0.29777	1.0897	-0.394469
0000031_18.tif	control	N2	wt	VEH	14.812	10.224	4.98429	3.57683	-1.40745	0	0.29777	1.06507	-0.419098
0000031_18.tif	control	N2	wt	VEH	12.115	8.495	4.98429	3.62086	-1.36343	0	0.29777	1.07818	-0.405989
0000031_18.tif	control	N2	wt	VEH	12.026	8.391	4.98429	3.7171	-1.26718	0	0.29777	1.10684	-0.377329
0000031_18.tif	control	N2	wt	VEH	16.151	11.755	4.98429	4.39847	-0.585816	0	0.29777	1.30973	-0.174438
0000031_18.tif	control	N2	wt	VEH	16.269	13.495	4.98429	4.71443	-0.269861	0	0.29777	1.40382	-0.0803566
0000031_18.tif	control	N2	wt	VEH	16.207	13.391	4.98429	4.62512	-0.359167	0	0.29777	1.37722	-0.106949
0000031_18.tif	control	N2	wt	VEH	15.512	14.655	4.98429	4.53494	-0.449352	0	0.29777	1.35037	-0.133803
0000031_18.tif	control	N2	wt	VEH	15.102	15.349	4.98429	4.6574	-0.326886	0	0.29777	1.38683	-0.0973369
0000031_18.tif	control	N2	wt	VEH	15.061	15.349	4.98429	4.62812	-0.356165	0	0.29777	1.37812	-0.106055
0000031_18.tif	control	N2	wt	VEH	15.311	16.036	4.98429	5.29783	0.313541	1	0.29777	1.57753	0.093363
0000031_18.tif	control	N2	wt	VEH	15.443	15.925	4.98429	5.30647	0.32218	1	0.29777	1.58011	0.0959355
0000002_20.tif	predator	CB1112	cat2(e1112)	VEH	9.875	15.531	4.57815	4.39295	-0.185196	0	0.29777	1.30809	-0.0551457
0000002_20.tif	predator	CB1112	cat2(e1112)	VEH	11.488	16.359	4.57815	4.36752	-0.210628	0	0.29777	1.30052	-0.0627186
0000002_20.tif	predator	CB1112	cat2(e1112)	VEH	11.002	19.818	4.57815	7.8415	3.26335	1	0.29777	2.33496	0.971729
0000002_20.tif	predator	CB1112	cat2(e1112)	VEH	10.946	19.922	4.57815	7.9552	3.37705	1	0.29777	2.36882	1.00558
0000002_20.tif	predator	CB1112	cat2(e1112)	VEH	11.562	13.672	4.57815	1.8874	-2.69075	0	0.29777	0.562011	-0.801224
0000002_20.tif	predator	CB1112	cat2(e1112)	VEH	11.297	13.474	4.57815	1.91645	-2.6617	0	0.29777	0.570662	-0.792573
0000002_20.tif	predator	CB1112	cat2(e1112)	VEH	9.974	14.094	4.57815	3.33608	-1.24206	0	0.29777	0.993385	-0.369849
0000002_20.tif	predator	CB1112	cat2(e1112)	VEH	11.99	14.729	4.57815	2.66249	-1.91566	0	0.29777	0.792809	-0.570426
0000002_20.tif	predator	CB1112	cat2(e1112)	VEH	13.078	14.797	4.57815	2.66397	-1.91418	0	0.29777	0.793249	-0.569985
0000002_20.tif	predator	CB1112	cat2(e1112)	VEH	12.453	14.141	4.57815	1.99449	-2.58365	0	0.29777	0.5939	-0.769335
0000002_20.tif	predator	CB1112	cat2(e1112)	VEH	12.526	13.38	4.57815	1.23039	-3.34776	0	0.29777	0.366372	-0.996863
0000002_20.tif	predator	CB1112	cat2(e1112)	VEH	11.26	13.073	4.57815	1.6986	-2.87955	0	0.29777	0.505791	-0.857444
0000002_20.tif	predator	CB1112	cat2(e1112)	VEH	11.135	12.266	4.57815	1.56153	-3.01661	0	0.29777	0.464978	-0.898257
0000002_20.tif	predator	CB1112	cat2(e1112)	VEH	11.667	12.13	4.57815	1.02647	-3.55168	0	0.29777	0.305651	-1.05758
0000002_20.tif	predator	CB1112	cat2(e1112)	VEH	12.302	16.469	4.57815	4.32571	-0.25244	0	0.29777	1.28807	-0.075169
0000002_20.tif	predator	CB1112	cat2(e1112)	VEH	13.026	15.703	4.57815	3.55762	-1.02053	0	0.29777	1.05935	-0.303883
0000002_20.tif	predator	CB1112	cat2(e1112)	VEH	12.385	15.318	4.57815	3.17199	-1.40616	0	0.29777	0.944523	-0.418712
0000002_20.tif	predator	CB1112	cat2(e1112)	VEH	9.229	11.417	4.57815	3.543	-1.03515	0	0.29777	1.055	-0.308237
0000002_20.tif	predator	CB1112	cat2(e1112)	VEH	9.203	11.203	4.57815	3.6191	-0.95905	0	0.29777	1.07766	-0.285576
0000002_20.tif	predator	CB1112	cat2(e1112)	VEH	12.672	11.469	4.57815	0.692319	-3.88583	0	0.29777	0.206152	-1.15708
0000002_20.tif	predator	CB1112	cat2(e1112)	VEH	12.781	11.438	4.57815	0.728336	-3.84981	0	0.29777	0.216877	-1.14636
0000002_20.tif	predator	CB1112	cat2(e1112)	VEH	11.646	10.698	4.57815	1.79905	-2.7791	0	0.29777	0.535703	-0.827532
0000002_20.tif	predator	CB1112	cat2(e1112)	VEH	12.25	10.651	4.57815	1.57364	-3.00451	0	0.29777	0.468583	-0.894652
0000002_20.tif	predator	CB1112	cat2(e1112)	VEH	12.964	10.271	4.57815	1.90933	-2.66882	0	0.29777	0.568541	-0.794694
0000002_20.tif	predator	CB1112	cat2(e1112)	VEH	13.406	9.839	4.57815	2.429	-2.14914	0	0.29777	0.723284	-0.639951
0000002_20.tif	predator	CB1112	cat2(e1112)	VEH	14.609	9.964	4.57815	2.91511	-1.66304	0	0.29777	0.868032	-0.495203
0000002_20.tif	predator	CB1112	cat2(e1112)	VEH	14.87	10.203	4.57815	2.92798	-1.65016	0	0.29777	0.871866	-0.491369
0000002_20.tif	predator	CB1112	cat2(e1112)	VEH	15.042	8.156	4.57815	4.64304	0.0648933	1	0.29777	1.38256	0.0193233
0000002_20.tif	predator	CB1112	cat2(e1112)	VEH	15.25	8.547	4.57815	4.4271	-0.151044	0	0.29777	1.31826	-0.0449763
0000002_20.tif	predator	CB1112	cat2(e1112)	VEH	17.198	7.318	4.57815	6.61435	2.03621	1	0.29777	1.96956	0.606321
0000002_20.tif	predator	CB1112	cat2(e1112)	VEH	17.193	6.335	4.57815	7.36154	2.78339	1	0.29777	2.19205	0.828811
0000002_20.tif	predator	CB1112	cat2(e1112)	VEH	15.911	13.818	4.57815	3.61955	-0.958593	0	0.29777	1.07779	-0.28544
0000002_20.tif	predator	CB1112	cat2(e1112)	VEH	16.401	12.448	4.57815	3.71909	-0.859057	0	0.29777	1.10743	-0.255801
0000002_20.tif	predator	CB1112	cat2(e1112)	VEH	15.865	12.698	4.57815	3.21713	-1.36101	0	0.29777	0.957966	-0.405269
0000002_20.tif	predator	CB1112	cat2(e1112)	VEH	15.057	14.339	4.57815	3.21437	-1.36378	0	0.29777	0.957143	-0.406092
0000002_20.tif	predator	CB1112	cat2(e1112)	VEH	15.198	15.349	4.57815	4.05443	-0.523721	0	0.29777	1.20729	-0.155949
0000002_20.tif	predator	CB1112	cat2(e1112)	VEH	13.969	15.125	4.57815	3.22699	-1.35116	0	0.29777	0.960901	-0.402334
0000002_20.tif	predator	CB1112	cat2(e1112)	VEH	14.37	15.229	4.57815	3.49642	-1.08173	0	0.29777	1.04113	-0.322106
0000002_20.tif	predator	CB1112	cat2(e1112)	VEH	14.255	15.833	4.57815	3.99042	-0.58773	0	0.29777	1.18823	-0.175008
0000002_20.tif	predator	CB1112	cat2(e1112)	VEH	14.135	15.875	4.57815	3.98411	-0.594034	0	0.29777	1.18635	-0.176885
0000002_20.tif	predator	CB1112	cat2(e1112)	VEH	13.797	15.979	4.57815	3.97441	-0.603737	0	0.29777	1.18346	-0.179775
0000003_48.tif	predator	N2	wt	VEH	8.021	8.521	4.88026	5.69626	0.816008	1	0.29777	1.69618	0.242983
0000003_48.tif	predator	N2	wt	VEH	8.599	2.925	4.88026	9.23911	4.35885	1	0.29777	2.75113	1.29794
0000003_48.tif	predator	N2	wt	VEH	8.356	2.96	4.88026	9.33177	4.45151	1	0.29777	2.77872	1.32553
0000003_48.tif	predator	N2	wt	VEH	8.12	10.373	4.88026	5.08518	0.204929	1	0.29777	1.51422	0.0610216
0000003_48.tif	predator	N2	wt	VEH	8.523	11.193	4.88026	4.65519	-0.225065	0	0.29777	1.38618	-0.0670177
0000003_48.tif	predator	N2	wt	VEH	8.557	11.38	4.88026	4.63471	-0.245544	0	0.29777	1.38008	-0.0731157
0000003_48.tif	predator	N2	wt	VEH	6.182	11.984	4.88026	7.06563	2.18537	1	0.29777	2.10393	0.650737
0000003_48.tif	predator	N2	wt	VEH	5.995	11.97	4.88026	7.2487	2.36844	1	0.29777	2.15844	0.705251
0000003_48.tif	predator	N2	wt	VEH	5.835	13.946	4.88026	7.92399	3.04373	1	0.29777	2.35953	0.906333
0000003_48.tif	predator	N2	wt	VEH	7.168	15.918	4.88026	7.79097	2.91072	1	0.29777	2.31992	0.866724
0000003_48.tif	predator	N2	wt	VEH	6.557	16.911	4.88026	8.90258	4.02233	1	0.29777	2.65092	1.19773
0000003_48.tif	predator	N2	wt	VEH	6.655	17.03	4.88026	8.91074	4.03048	1	0.29777	2.65335	1.20016
0000003_48.tif	predator	N2	wt	VEH	8.467	19.148	4.88026	9.44961	4.56935	1	0.29777	2.81381	1.36062
0000003_48.tif	predator	N2	wt	VEH	11.981	21.095	4.88026	10.2117	5.33144	1	0.29777	3.04074	1.58754
0000003_48.tif	predator	N2	wt	VEH	9.988	19.79	4.88026	9.39311	4.51285	1	0.29777	2.79698	1.34379
0000003_48.tif	predator	N2	wt	VEH	10.217	19.589	4.88026	9.12757	4.24731	1	0.29777	2.71792	1.26472
0000003_48.tif	predator	N2	wt	VEH	10.321	19.332	4.88026	8.85075	3.9705	1	0.29777	2.63549	1.1823
0000003_48.tif	predator	N2	wt	VEH	10.71	19.63	4.88026	9.01952	4.13927	1	0.29777	2.68574	1.23255
0000003_48.tif	predator	N2	wt	VEH	11.863	18.825	4.88026	7.98009	3.09984	1	0.29777	2.37623	0.923038
0000003_48.tif	predator	N2	wt	VEH	11.238	16.957	4.88026	6.3078	1.42755	1	0.29777	1.87827	0.42508
0000003_48.tif	predator	N2	wt	VEH	13.884	17.373	4.88026	6.45936	1.5791	1	0.29777	1.9234	0.47021
0000003_48.tif	predator	N2	wt	VEH	13.432	13.988	4.88026	3.04612	-1.83414	0	0.29777	0.907042	-0.546152
0000003_48.tif	predator	N2	wt	VEH	9.995	11.366	4.88026	3.20373	-1.67652	0	0.29777	0.953975	-0.499219
0000003_48.tif	predator	N2	wt	VEH	14.502	11.241	4.88026	1.36082	-3.51943	0	0.29777	0.405213	-1.04798
0000003_48.tif	predator	N2	wt	VEH	15.387	8.609	4.88026	3.22499	-1.65527	0	0.29777	0.960305	-0.492889
0000003_48.tif	predator	N2	wt	VEH	17.491	9.158	4.88026	4.67716	-0.2031	0	0.29777	1.39272	-0.0604772
0000003_48.tif	predator	N2	wt	VEH	17.929	9.644	4.88026	4.93381	0.0535588	1	0.29777	1.46914	0.0159482
0000003_48.tif	predator	N2	wt	VEH	18.311	9.47	4.88026	5.3487	0.468446	1	0.29777	1.59268	0.139489
0000003_48.tif	predator	N2	wt	VEH	16.845	15.575	4.88026	5.90371	1.02346	1	0.29777	1.75795	0.304754
0000003_48.tif	predator	N2	wt	VEH	16.97	15.693	4.88026	6.07391	1.19366	1	0.29777	1.80863	0.355435
0000003_48.tif	predator	N2	wt	VEH	17.373	16.394	4.88026	6.87407	1.99382	1	0.29777	2.04689	0.593699
0000003_48.tif	predator	N2	wt	VEH	21.856	15.682	4.88026	9.88814	5.00788	1	0.29777	2.94439	1.4912
0000003_48.tif	predator	N2	wt	VEH	22.155	11.957	4.88026	9.03893	4.15868	1	0.29777	2.69152	1.23833
0000003_48.tif	predator	N2	wt	VEH	19.252	11.866	4.88026	6.14817	1.26791	1	0.29777	1.83074	0.377546
0000007_42.tif	predator	N2	wt	DA	5.854	7.229	4.68746	9.07676	4.3893	1	0.29777	2.70279	1.307
0000007_42.tif	predator	N2	wt	DA	8.37	5.877	4.68746	7.9259	3.23843	1	0.29777	2.36009	0.964309
0000007_42.tif	predator	N2	wt	DA	8.703	11.273	4.68746	5.074	0.386538	1	0.29777	1.51088	0.1151
0000007_42.tif	predator	N2	wt	DA	7.87	11.411	4.68746	5.89651	1.20905	1	0.29777	1.7558	0.360018
0000007_42.tif	predator	N2	wt	DA	6.939	11.974	4.68746	6.82699	2.13953	1	0.29777	2.03287	0.637088
0000007_42.tif	predator	N2	wt	DA	5.911	12.203	4.68746	7.86588	3.17842	1	0.29777	2.34222	0.946437
0000007_42.tif	predator	N2	wt	DA	6.168	11.127	4.68746	7.6127	2.92524	1	0.29777	2.26683	0.871048
0000007_42.tif	predator	N2	wt	DA	5.856	11.127	4.68746	7.92388	3.23642	1	0.29777	2.35949	0.96371
0000007_42.tif	predator	N2	wt	DA	5.828	10.939	4.68746	7.96728	3.27982	1	0.29777	2.37242	0.976633
0000007_42.tif	predator	N2	wt	DA	7.516	14.773	4.68746	6.96454	2.27707	1	0.29777	2.07383	0.678044
0000007_42.tif	predator	N2	wt	DA	12.245	18.328	4.68746	6.81064	2.12318	1	0.29777	2.028	0.632219
0000007_42.tif	predator	N2	wt	DA	9.835	6.033	4.68746	6.88365	2.19619	1	0.29777	2.04974	0.653959
0000007_42.tif	predator	N2	wt	DA	13.127	4.123	4.68746	7.59144	2.90398	1	0.29777	2.2605	0.864717
0000007_42.tif	predator	N2	wt	DA	11.148	3.22	4.68746	8.86169	4.17423	1	0.29777	2.63875	1.24296
0000007_42.tif	predator	N2	wt	DA	11.911	2.356	4.68746	9.51341	4.82595	1	0.29777	2.83281	1.43702
0000007_42.tif	predator	N2	wt	DA	11.578	1.981	4.68746	9.94922	5.26176	1	0.29777	2.96258	1.56679
0000007_42.tif	predator	N2	wt	DA	11.55	1.87	4.68746	10.0637	5.3762	1	0.29777	2.99666	1.60087
0000007_42.tif	predator	N2	wt	DA	14.214	4.002	4.68746	7.6994	3.01194	1	0.29777	2.29265	0.896864
0000007_42.tif	predator	N2	wt	DA	15.644	3.786	4.68746	8.12349	3.43603	1	0.29777	2.41893	1.02315
0000007_42.tif	predator	N2	wt	DA	16.859	4.696	4.68746	7.648	2.96054	1	0.29777	2.27734	0.881559
0000007_42.tif	predator	N2	wt	DA	18.311	4.981	4.68746	8.10527	3.41781	1	0.29777	2.41351	1.01772
0000007_42.tif	predator	N2	wt	DA	18.415	4.766	4.68746	8.34165	3.65419	1	0.29777	2.48389	1.08811
0000007_42.tif	predator	N2	wt	DA	18.832	5.016	4.68746	8.38098	3.69352	1	0.29777	2.4956	1.09982
0000007_42.tif	predator	N2	wt	DA	16.207	7.738	4.68746	4.64654	-0.0409241	0	0.29777	1.3836	-0.012186
0000007_42.tif	predator	N2	wt	DA	15.533	7.877	4.68746	4.20324	-0.484219	0	0.29777	1.2516	-0.144186
0000007_42.tif	predator	N2	wt	DA	14.7	7.661	4.68746	4.13525	-0.552207	0	0.29777	1.23135	-0.164431
0000007_42.tif	predator	N2	wt	DA	16.79	11.578	4.68746	3.032	-1.65547	0	0.29777	0.902837	-0.492948
0000007_42.tif	predator	N2	wt	DA	16.839	11.648	4.68746	3.07926	-1.6082	0	0.29777	0.916911	-0.478874
0000007_42.tif	predator	N2	wt	DA	16.644	12.314	4.68746	2.95116	-1.7363	0	0.29777	0.878766	-0.517019
0000007_42.tif	predator	N2	wt	DA	14.158	15.661	4.68746	3.99289	-0.694576	0	0.29777	1.18896	-0.206824
0000007_42.tif	predator	N2	wt	DA	14.88	16.05	4.68746	4.50349	-0.183969	0	0.29777	1.341	-0.0547805
0000007_42.tif	predator	N2	wt	DA	16.964	17.05	4.68746	6.24633	1.55887	1	0.29777	1.85997	0.464185
0000007_42.tif	predator	N2	wt	DA	14.436	20.168	4.68746	8.5069	3.81944	1	0.29777	2.5331	1.13731
0000007_42.tif	predator	N2	wt	DA	14.262	20.203	4.68746	8.52978	3.84232	1	0.29777	2.53991	1.14413
0000007_42.tif	predator	N2	wt	DA	19.005	10.929	4.68746	5.29963	0.612171	1	0.29777	1.57807	0.182286
0000007_42.tif	predator	N2	wt	DA	18.95	4.967	4.68746	8.49164	3.80418	1	0.29777	2.52856	1.13277
0000009_14.tif	predator	CB1112	cat2(e1112)	DA	7.917	13.052	5.06261	4.99568	-0.0669316	0	0.29777	1.48756	-0.0199302
0000009_14.tif	predator	CB1112	cat2(e1112)	DA	8.269	12.672	5.06261	4.52064	-0.541964	0	0.29777	1.34611	-0.161381
0000009_14.tif	predator	CB1112	cat2(e1112)	DA	8.318	12.255	5.06261	4.33188	-0.730731	0	0.29777	1.2899	-0.21759
0000009_14.tif	predator	CB1112	cat2(e1112)	DA	8.915	12.095	5.06261	3.71453	-1.34808	0	0.29777	1.10607	-0.401418
0000009_14.tif	predator	CB1112	cat2(e1112)	DA	11.564	2.46	5.06261	8.53391	3.4713	1	0.29777	2.54114	1.03365
0000009_14.tif	predator	CB1112	cat2(e1112)	DA	11.675	2.946	5.06261	8.03925	2.97664	1	0.29777	2.39385	0.886355
0000009_14.tif	predator	CB1112	cat2(e1112)	DA	12.064	4.655	5.06261	6.3047	1.2421	1	0.29777	1.87735	0.369859
0000009_14.tif	predator	CB1112	cat2(e1112)	DA	14.12	10.359	5.06261	1.77271	-3.2899	0	0.29777	0.52786	-0.979632
0000009_14.tif	predator	CB1112	cat2(e1112)	DA	10.856	11.842	5.06261	1.82584	-3.23677	0	0.29777	0.543681	-0.963812
0000009_14.tif	predator	CB1112	cat2(e1112)	DA	10.807	12.009	5.06261	1.95412	-3.10848	0	0.29777	0.58188	-0.925613
0000009_14.tif	predator	CB1112	cat2(e1112)	DA	10.273	14.325	5.06261	4.01681	-1.0458	0	0.29777	1.19609	-0.311407
0000009_14.tif	predator	CB1112	cat2(e1112)	DA	16.37	20.12	5.06261	9.97535	4.91275	1	0.29777	2.97036	1.46287
0000009_14.tif	predator	CB1112	cat2(e1112)	DA	16.21	20.016	5.06261	9.8174	4.75479	1	0.29777	2.92333	1.41583
0000009_14.tif	predator	CB1112	cat2(e1112)	DA	16.696	19.842	5.06261	9.85641	4.7938	1	0.29777	2.93494	1.42745
0000009_14.tif	predator	CB1112	cat2(e1112)	DA	15.536	20.05	5.06261	9.61156	4.54896	1	0.29777	2.86204	1.35454
0000009_14.tif	predator	CB1112	cat2(e1112)	DA	15.536	19.78	5.06261	9.35628	4.29367	1	0.29777	2.78602	1.27853
0000009_14.tif	predator	CB1112	cat2(e1112)	DA	16.002	12.457	5.06261	3.86109	-1.20152	0	0.29777	1.14972	-0.357777
0000009_14.tif	predator	CB1112	cat2(e1112)	DA	21.898	12.877	5.06261	9.64487	4.58226	1	0.29777	2.87195	1.36446
0000009_14.tif	predator	CB1112	cat2(e1112)	DA	19.425	15.29	5.06261	8.21775	3.15515	1	0.29777	2.447	0.939508
0000009_14.tif	predator	CB1112	cat2(e1112)	DA	23.297	12.884	5.06261	11.0204	5.95778	1	0.29777	3.28154	1.77405
0000009_14.tif	predator	CB1112	cat2(e1112)	DA	23.616	12.634	5.06261	11.2945	6.23194	1	0.29777	3.36318	1.85569
0000009_14.tif	predator	CB1112	cat2(e1112)	DA	22.998	12.918	5.06261	10.7324	5.66975	1	0.29777	3.19577	1.68828
0000009_14.tif	predator	CB1112	cat2(e1112)	DA	22.72	12.564	5.06261	10.3983	5.33573	1	0.29777	3.09631	1.58882
0000009_14.tif	predator	CB1112	cat2(e1112)	DA	22.727	12.481	5.06261	10.3927	5.33008	1	0.29777	3.09463	1.58714
0000009_14.tif	predator	CB1112	cat2(e1112)	DA	23.283	11.592	5.06261	10.8541	5.79151	1	0.29777	3.23203	1.72454
0000009_14.tif	predator	CB1112	cat2(e1112)	DA	22.7	11.391	5.06261	10.2616	5.19896	1	0.29777	3.05559	1.54809
0000009_14.tif	predator	CB1112	cat2(e1112)	DA	22.964	11.155	5.06261	10.518	5.45543	1	0.29777	3.13196	1.62446
0000009_14.tif	predator	CB1112	cat2(e1112)	DA	23.019	10.28	5.06261	10.5921	5.52948	1	0.29777	3.15401	1.64651
0000009_14.tif	predator	CB1112	cat2(e1112)	DA	22.533	7.453	5.06261	10.6734	5.61083	1	0.29777	3.17823	1.67074
00000011_2.tif	control	CB1112	cat2(e1112)	VEH	12.458	14.823	5.22413	4.56603	-0.658105	0	0.29777	1.35963	-0.195964
00000011_2.tif	control	CB1112	cat2(e1112)	VEH	12.521	15.141	5.22413	4.88014	-0.34399	0	0.29777	1.45316	-0.10243
00000011_2.tif	control	CB1112	cat2(e1112)	VEH	13.255	15.172	5.22413	4.93244	-0.291696	0	0.29777	1.46873	-0.0868584
00000011_2.tif	control	CB1112	cat2(e1112)	VEH	13.276	15.078	5.22413	4.84121	-0.382925	0	0.29777	1.44157	-0.114023
00000011_2.tif	control	CB1112	cat2(e1112)	VEH	13.812	15.286	5.22413	5.13214	-0.0919908	0	0.29777	1.5282	-0.0273921
00000011_2.tif	control	CB1112	cat2(e1112)	VEH	13.953	15.281	5.22413	5.15844	-0.0656949	0	0.29777	1.53603	-0.019562
00000011_2.tif	control	CB1112	cat2(e1112)	VEH	13.76	14.318	5.22413	4.17719	-1.04694	0	0.29777	1.24384	-0.311748
00000011_2.tif	control	CB1112	cat2(e1112)	VEH	14.276	13.865	5.22413	3.91111	-1.31303	0	0.29777	1.16461	-0.39098
00000011_2.tif	control	CB1112	cat2(e1112)	VEH	13.953	13.469	5.22413	3.42323	-1.80091	0	0.29777	1.01933	-0.536256
00000011_2.tif	control	CB1112	cat2(e1112)	VEH	13.224	14.036	5.22413	3.80031	-1.42383	0	0.29777	1.13162	-0.423973
00000011_2.tif	control	CB1112	cat2(e1112)	VEH	12.797	14.411	5.22413	4.14533	-1.07881	0	0.29777	1.23435	-0.321236
00000011_2.tif	control	CB1112	cat2(e1112)	VEH	12.828	13.839	5.22413	3.57396	-1.65017	0	0.29777	1.06422	-0.491371
00000011_2.tif	control	CB1112	cat2(e1112)	VEH	13.089	13.677	5.22413	3.4283	-1.79583	0	0.29777	1.02085	-0.534745
00000011_2.tif	control	CB1112	cat2(e1112)	VEH	13.068	13.573	5.22413	3.32274	-1.9014	0	0.29777	0.989411	-0.566179
00000011_2.tif	control	CB1112	cat2(e1112)	VEH	11.797	14.031	5.22413	3.88252	-1.34162	0	0.29777	1.1561	-0.399494
00000011_2.tif	control	CB1112	cat2(e1112)	VEH	11.432	13.052	5.22413	3.0799	-2.14424	0	0.29777	0.917101	-0.638489
00000011_2.tif	control	CB1112	cat2(e1112)	VEH	11.271	11.552	5.22413	1.95614	-3.268	0	0.29777	0.582479	-0.973111
00000011_2.tif	control	CB1112	cat2(e1112)	VEH	11.25	11.464	5.22413	1.91578	-3.30835	0	0.29777	0.570463	-0.985127
00000011_2.tif	control	CB1112	cat2(e1112)	VEH	11.911	11.839	5.22413	1.78042	-3.44372	0	0.29777	0.530155	-1.02544
00000011_2.tif	control	CB1112	cat2(e1112)	VEH	12	11.823	5.22413	1.72606	-3.49808	0	0.29777	0.513968	-1.04162
00000011_2.tif	control	CB1112	cat2(e1112)	VEH	11.729	11.016	5.22413	1.26284	-3.9613	0	0.29777	0.376035	-1.17956
00000011_2.tif	control	CB1112	cat2(e1112)	VEH	11.526	10.661	5.22413	1.2814	-3.94273	0	0.29777	0.381562	-1.17403
00000011_2.tif	control	CB1112	cat2(e1112)	VEH	12.141	10.328	5.22413	0.607174	-4.61696	0	0.29777	0.180798	-1.37479
00000011_2.tif	control	CB1112	cat2(e1112)	VEH	12.802	10.177	5.22413	0.105688	-5.11845	0	0.29777	0.0314708	-1.52412
00000011_2.tif	control	CB1112	cat2(e1112)	VEH	12.203	9.25	5.22413	1.15153	-4.0726	0	0.29777	0.342891	-1.2127
00000011_2.tif	control	CB1112	cat2(e1112)	VEH	12.771	9.589	5.22413	0.677499	-4.54663	0	0.29777	0.201739	-1.35385
00000011_2.tif	control	CB1112	cat2(e1112)	VEH	12.167	6.786	5.22413	3.52767	-1.69646	0	0.29777	1.05044	-0.505155
00000011_2.tif	control	CB1112	cat2(e1112)	VEH	12.547	6.443	5.22413	3.82812	-1.39601	0	0.29777	1.1399	-0.41569
00000011_2.tif	control	CB1112	cat2(e1112)	VEH	12.573	6.359	5.22413	3.91078	-1.31335	0	0.29777	1.16451	-0.391076
00000011_2.tif	control	CB1112	cat2(e1112)	VEH	15.609	6.734	5.22413	4.54725	-0.676879	0	0.29777	1.35404	-0.201554
00000011_2.tif	control	CB1112	cat2(e1112)	VEH	15.448	7.505	5.22413	3.86385	-1.36028	0	0.29777	1.15054	-0.405052
00000011_2.tif	control	CB1112	cat2(e1112)	VEH	15.245	8.224	5.22413	3.22797	-1.99617	0	0.29777	0.961191	-0.594399
00000011_2.tif	control	CB1112	cat2(e1112)	VEH	13.823	8.995	5.22413	1.66659	-3.55754	0	0.29777	0.496261	-1.05933
00000011_2.tif	control	CB1112	cat2(e1112)	VEH	13.745	9.042	5.22413	1.58056	-3.64357	0	0.29777	0.470644	-1.08495
00000011_2.tif	control	CB1112	cat2(e1112)	VEH	16.453	8.276	5.22413	4.20825	-1.01588	0	0.29777	1.25309	-0.3025
00000011_2.tif	control	CB1112	cat2(e1112)	VEH	16.016	12.161	5.22413	3.78027	-1.44386	0	0.29777	1.12565	-0.429938
00000011_2.tif	control	CB1112	cat2(e1112)	VEH	15.865	12.745	5.22413	3.98495	-1.23918	0	0.29777	1.1866	-0.368991
00000011_2.tif	control	CB1112	cat2(e1112)	VEH	14.76	13.203	5.22413	3.56177	-1.66237	0	0.29777	1.06059	-0.495002
00000011_2.tif	control	CB1112	cat2(e1112)	VEH	14.484	13.516	5.22413	3.686	-1.53813	0	0.29777	1.09758	-0.458009
00000011_2.tif	control	CB1112	cat2(e1112)	VEH	15.234	14.104	5.22413	4.57443	-0.649708	0	0.29777	1.36213	-0.193464
00000011_2.tif	control	CB1112	cat2(e1112)	VEH	17.193	10.797	5.22413	4.47958	-0.74455	0	0.29777	1.33389	-0.221705
0000011_32.tif	control	N2	wt	DA	5.052	14.958	4.93239	9.2408	4.30842	1	0.29777	2.75163	1.28292
0000011_32.tif	control	N2	wt	DA	5.866	14.53	4.93239	8.32994	3.39755	1	0.29777	2.48041	1.01169
0000011_32.tif	control	N2	wt	DA	8.054	14.057	4.93239	6.11536	1.18297	1	0.29777	1.82097	0.352253
0000011_32.tif	control	N2	wt	DA	10.092	12.839	4.93239	3.78718	-1.1452	0	0.29777	1.12771	-0.341007
0000011_32.tif	control	N2	wt	DA	10.342	12.804	4.93239	3.53771	-1.39468	0	0.29777	1.05342	-0.415293
0000011_32.tif	control	N2	wt	DA	12.099	11.05	4.93239	1.77575	-3.15664	0	0.29777	0.528764	-0.939952
0000011_32.tif	control	N2	wt	DA	11.939	10.995	4.93239	1.94439	-2.98799	0	0.29777	0.578982	-0.889734
0000011_32.tif	control	N2	wt	DA	12.043	7.606	4.93239	4.4868	-0.445587	0	0.29777	1.33603	-0.132682
0000011_32.tif	control	N2	wt	DA	11.057	6.981	4.93239	5.47806	0.545672	1	0.29777	1.6312	0.162485
0000011_32.tif	control	N2	wt	DA	13.085	2.811	4.93239	8.97777	4.04538	1	0.29777	2.67331	1.20459
0000011_32.tif	control	N2	wt	DA	13.189	2.998	4.93239	8.78431	3.85192	1	0.29777	2.6157	1.14699
0000011_32.tif	control	N2	wt	DA	13.418	3.832	4.93239	7.9399	3.00751	1	0.29777	2.36426	0.895547
0000011_32.tif	control	N2	wt	DA	17.578	6.575	4.93239	6.46528	1.53289	1	0.29777	1.92517	0.456449
0000011_32.tif	control	N2	wt	DA	12.731	8.498	4.93239	3.41553	-1.51685	0	0.29777	1.01704	-0.451673
0000011_32.tif	control	N2	wt	DA	12.585	9.443	4.93239	2.58721	-2.34518	0	0.29777	0.770393	-0.698323
0000011_32.tif	control	N2	wt	DA	12.675	9.519	4.93239	2.4798	-2.45258	0	0.29777	0.73841	-0.730306
0000011_32.tif	control	N2	wt	DA	13.036	9.519	4.93239	2.34997	-2.58242	0	0.29777	0.69975	-0.768966
0000011_32.tif	control	N2	wt	DA	16.592	9.012	4.93239	3.97617	-0.956214	0	0.29777	1.18398	-0.284732
0000011_32.tif	control	N2	wt	DA	15.53	10.102	4.93239	2.45571	-2.47667	0	0.29777	0.731238	-0.737478
0000011_32.tif	control	N2	wt	DA	13.273	10.595	4.93239	1.25485	-3.67754	0	0.29777	0.373656	-1.09506
0000011_32.tif	control	N2	wt	DA	13.28	10.658	4.93239	1.19365	-3.73874	0	0.29777	0.355433	-1.11328
0000011_32.tif	control	N2	wt	DA	12.467	11.22	4.93239	1.37046	-3.56192	0	0.29777	0.408082	-1.06063
0000011_32.tif	control	N2	wt	DA	12.481	11.401	4.93239	1.29548	-3.6369	0	0.29777	0.385756	-1.08296
0000011_32.tif	control	N2	wt	DA	13.356	11.957	4.93239	0.414614	-4.51777	0	0.29777	0.12346	-1.34526
0000011_32.tif	control	N2	wt	DA	14.752	12.373	4.93239	1.19383	-3.73855	0	0.29777	0.355487	-1.11323
0000011_32.tif	control	N2	wt	DA	14.807	12.484	4.93239	1.29939	-3.633	0	0.29777	0.386919	-1.0818
0000011_32.tif	control	N2	wt	DA	14.946	13.443	4.93239	2.075	-2.85739	0	0.29777	0.617872	-0.850844
0000011_32.tif	control	N2	wt	DA	16.606	14.04	4.93239	3.6711	-1.26128	0	0.29777	1.09314	-0.375572
0000011_32.tif	control	N2	wt	DA	13.905	15.568	4.93239	3.80631	-1.12608	0	0.29777	1.1334	-0.335313
0000011_32.tif	control	N2	wt	DA	12.543	20.582	4.93239	8.89475	3.96237	1	0.29777	2.64859	1.17987
0000011_32.tif	control	N2	wt	DA	12.911	20.644	4.93239	8.91515	3.98276	1	0.29777	2.65466	1.18595
0000011_32.tif	control	N2	wt	DA	12.786	21.762	4.93239	10.0399	5.10753	1	0.29777	2.98958	1.52087
0000011_32.tif	control	N2	wt	DA	12.87	21.852	4.93239	10.1221	5.18971	1	0.29777	3.01405	1.54534
0000011_32.tif	control	N2	wt	DA	16.773	21.623	4.93239	10.3178	5.38541	1	0.29777	3.07233	1.60361
0000011_32.tif	control	N2	wt	DA	17.769	19.814	4.93239	9.00735	4.07496	1	0.29777	2.68212	1.2134
0000011_32.tif	control	N2	wt	DA	18.464	19.55	4.93239	9.11363	4.18124	1	0.29777	2.71377	1.24505
0000011_32.tif	control	N2	wt	DA	21.88	17.661	4.93239	10.0634	5.13098	1	0.29777	2.99657	1.52785
0000011_32.tif	control	N2	wt	DA	18.373	16.655	4.93239	6.74652	1.81413	1	0.29777	2.00891	0.540195
0000011_32.tif	control	N2	wt	DA	17.957	12.727	4.93239	4.34072	-0.59167	0	0.29777	1.29253	-0.176182
0000011_32.tif	control	N2	wt	DA	18.366	11.981	4.93239	4.64698	-0.285409	0	0.29777	1.38373	-0.0849862
0000011_32.tif	control	N2	wt	DA	18.332	6.727	4.93239	6.82826	1.89588	1	0.29777	2.03325	0.564536
0000011_32.tif	control	N2	wt	DA	18.29	6.63	4.93239	6.87218	1.93979	1	0.29777	2.04633	0.577613
0000011_32.tif	control	N2	wt	DA	18.179	6.554	4.93239	6.85653	1.92414	1	0.29777	2.04167	0.572952
0000011_32.tif	control	N2	wt	DA	19.991	5.12	4.93239	9.1348	4.20242	1	0.29777	2.72007	1.25135
0000015_30.tif	control	N2	wt	VEH	4.312	14.479	4.91146	8.27644	3.36497	1	0.29777	2.46447	1.00199
0000015_30.tif	control	N2	wt	VEH	4.418	14.405	4.91146	8.15183	3.24036	1	0.29777	2.42737	0.964883
0000015_30.tif	control	N2	wt	VEH	5.03	15.446	4.91146	8.00764	3.09618	1	0.29777	2.38443	0.921948
0000015_30.tif	control	N2	wt	VEH	7.543	16.835	4.91146	6.86919	1.95773	1	0.29777	2.04544	0.582952
0000015_30.tif	control	N2	wt	VEH	7.689	16.856	4.91146	6.78895	1.87748	1	0.29777	2.02154	0.559058
0000015_30.tif	control	N2	wt	VEH	9.589	14.398	4.91146	3.68964	-1.22183	0	0.29777	1.09866	-0.363823
0000015_30.tif	control	N2	wt	VEH	9.589	14.252	4.91146	3.58438	-1.32708	0	0.29777	1.06732	-0.395165
0000015_30.tif	control	N2	wt	VEH	9.769	13.641	4.91146	3.03833	-1.87313	0	0.29777	0.904723	-0.557763
0000015_30.tif	control	N2	wt	VEH	10.839	13.446	4.91146	2.15661	-2.75486	0	0.29777	0.642173	-0.820314
0000015_30.tif	control	N2	wt	VEH	10.936	14.974	4.91146	3.47496	-1.4365	0	0.29777	1.03474	-0.427747
0000015_30.tif	control	N2	wt	VEH	10.887	14.939	4.91146	3.45904	-1.45242	0	0.29777	1.03	-0.432487
0000015_30.tif	control	N2	wt	VEH	9.012	13.217	4.91146	3.44726	-1.4642	0	0.29777	1.02649	-0.435996
0000015_30.tif	control	N2	wt	VEH	9.345	11.918	4.91146	2.77235	-2.13911	0	0.29777	0.825522	-0.636964
0000015_30.tif	control	N2	wt	VEH	12.623	12.432	4.91146	0.891985	-4.01948	0	0.29777	0.265606	-1.19688
0000015_30.tif	control	N2	wt	VEH	12.623	12.37	4.91146	0.842072	-4.06939	0	0.29777	0.250744	-1.21174
0000015_30.tif	control	N2	wt	VEH	9.845	11.391	4.91146	2.2854	-2.62607	0	0.29777	0.680523	-0.781964
0000015_30.tif	control	N2	wt	VEH	9.415	10.807	4.91146	2.83909	-2.07237	0	0.29777	0.845397	-0.61709
0000015_30.tif	control	N2	wt	VEH	11.609	10.599	4.91146	1.21195	-3.69952	0	0.29777	0.360882	-1.10161
0000015_30.tif	control	N2	wt	VEH	12.075	10.543	4.91146	1.1605	-3.75097	0	0.29777	0.345562	-1.11693
0000015_30.tif	control	N2	wt	VEH	12.845	10.398	4.91146	1.49824	-3.41322	0	0.29777	0.446131	-1.01636
0000015_30.tif	control	N2	wt	VEH	12.7	10.293	4.91146	1.52885	-3.38261	0	0.29777	0.455246	-1.00724
0000015_30.tif	control	N2	wt	VEH	12.547	10.314	4.91146	1.45642	-3.45504	0	0.29777	0.433679	-1.02881
0000015_30.tif	control	N2	wt	VEH	10.582	9.849	4.91146	2.40188	-2.50958	0	0.29777	0.715209	-0.747278
0000015_30.tif	control	N2	wt	VEH	9.769	10.189	4.91146	2.78708	-2.12439	0	0.29777	0.829908	-0.632579
0000015_30.tif	control	N2	wt	VEH	10.804	8.585	4.91146	3.38008	-1.53138	0	0.29777	1.00649	-0.456
0000015_30.tif	control	N2	wt	VEH	10.894	8.571	4.91146	3.35941	-1.55205	0	0.29777	1.00033	-0.462155
0000015_30.tif	control	N2	wt	VEH	12.13	7.502	4.91146	4.20105	-0.710411	0	0.29777	1.25095	-0.211539
0000015_30.tif	control	N2	wt	VEH	15.814	11.498	4.91146	3.71067	-1.2008	0	0.29777	1.10493	-0.357561
0000015_30.tif	control	N2	wt	VEH	15.87	11.484	4.91146	3.76737	-1.14409	0	0.29777	1.12181	-0.340677
0000015_30.tif	control	N2	wt	VEH	13.911	13.995	4.91146	2.91556	-1.99591	0	0.29777	0.868165	-0.594321
0000015_30.tif	control	N2	wt	VEH	20.745	9.53	4.91146	8.90519	3.99373	1	0.29777	2.6517	1.18921
0000015_30.tif	control	N2	wt	VEH	20.87	9.578	4.91146	9.01503	4.10356	1	0.29777	2.68441	1.22192
0000015_30.tif	control	N2	wt	VEH	11.641	2.168	4.91146	9.54648	4.63501	1	0.29777	2.84265	1.38017
0000016_44.tif	predator	N2	wt	VEH	3.083	12.719	4.92706	10.0531	5.126	1	0.29777	2.9935	1.52637
0000016_44.tif	predator	N2	wt	VEH	3.672	13.24	4.92706	9.48648	4.55942	1	0.29777	2.82479	1.35766
0000016_44.tif	predator	N2	wt	VEH	4.453	13.005	4.92706	8.69274	3.76568	1	0.29777	2.58844	1.12131
0000016_44.tif	predator	N2	wt	VEH	4.25	11.859	4.92706	8.91364	3.98658	1	0.29777	2.65422	1.18709
0000016_44.tif	predator	N2	wt	VEH	3.203	10.479	4.92706	10.1503	5.22328	1	0.29777	3.02247	1.55534
0000016_44.tif	predator	N2	wt	VEH	4.656	16.646	4.92706	9.40653	4.47947	1	0.29777	2.80098	1.33385
0000016_44.tif	predator	N2	wt	VEH	7.859	16.734	4.92706	6.71938	1.79232	1	0.29777	2.00083	0.5337
0000016_44.tif	predator	N2	wt	VEH	6.422	13.339	4.92706	6.75656	1.8295	1	0.29777	2.0119	0.544771
0000016_44.tif	predator	N2	wt	VEH	5.714	7.479	4.92706	9.00112	4.07406	1	0.29777	2.68026	1.21313
0000016_44.tif	predator	N2	wt	VEH	6.109	6.74	4.92706	9.13173	4.20468	1	0.29777	2.71916	1.25203
0000016_44.tif	predator	N2	wt	VEH	9.396	9.224	4.92706	5.01955	0.0924957	1	0.29777	1.49467	0.0275424
0000016_44.tif	predator	N2	wt	VEH	11.219	19.542	4.92706	7.22759	2.30053	1	0.29777	2.15216	0.685028
0000016_44.tif	predator	N2	wt	VEH	11.531	20.802	4.92706	8.38387	3.45681	1	0.29777	2.49646	1.02933
0000016_44.tif	predator	N2	wt	VEH	13.708	17.734	4.92706	5.19271	0.265653	1	0.29777	1.54623	0.0791035
0000016_44.tif	predator	N2	wt	VEH	14.693	3.292	4.92706	9.41086	4.4838	1	0.29777	2.80227	1.33514
0000016_44.tif	predator	N2	wt	VEH	17.062	6.031	4.92706	7.63014	2.70309	1	0.29777	2.27203	0.804898
0000016_44.tif	predator	N2	wt	VEH	17.625	4.786	4.92706	8.98874	4.06168	1	0.29777	2.67658	1.20945
0000016_44.tif	predator	N2	wt	VEH	17.729	4.776	4.92706	9.04975	4.1227	1	0.29777	2.69475	1.22762
0000016_44.tif	predator	N2	wt	VEH	16.62	15.88	4.92706	4.80432	-0.12274	0	0.29777	1.43058	-0.0365483
0000016_44.tif	predator	N2	wt	VEH	16.531	14.776	4.92706	4.04797	-0.879093	0	0.29777	1.20536	-0.261767
0000016_44.tif	predator	N2	wt	VEH	22.582	7.484	4.92706	10.7305	5.80345	1	0.29777	3.19522	1.72809
0000016_44.tif	predator	N2	wt	VEH	21.811	6.943	4.92706	10.3426	5.41557	1	0.29777	3.07972	1.61259
0000019_16.tif	predator	CB1112	cat2(e1112)	DA	2.615	12.281	5.1354	9.47808	4.34268	1	0.29777	2.82229	1.29312
0000019_16.tif	predator	CB1112	cat2(e1112)	DA	6.026	8.276	5.1354	6.67818	1.54279	1	0.29777	1.98856	0.459395
0000019_16.tif	predator	CB1112	cat2(e1112)	DA	6.241	8.102	5.1354	6.56577	1.43037	1	0.29777	1.95509	0.425922
0000019_16.tif	predator	CB1112	cat2(e1112)	DA	6.561	7.734	5.1354	6.47458	1.33918	1	0.29777	1.92794	0.398769
0000019_16.tif	predator	CB1112	cat2(e1112)	DA	8.543	14.061	5.1354	4.51253	-0.622868	0	0.29777	1.3437	-0.185471
0000019_16.tif	predator	CB1112	cat2(e1112)	DA	10.925	12.832	5.1354	1.97312	-3.16228	0	0.29777	0.587535	-0.941632
0000019_16.tif	predator	CB1112	cat2(e1112)	DA	11.877	11.693	5.1354	0.518402	-4.61699	0	0.29777	0.154365	-1.3748
0000019_16.tif	predator	CB1112	cat2(e1112)	DA	11.425	11.012	5.1354	0.633902	-4.50149	0	0.29777	0.188757	-1.34041
0000019_16.tif	predator	CB1112	cat2(e1112)	DA	7.571	7.554	5.1354	5.75937	0.623973	1	0.29777	1.71497	0.185801
0000019_16.tif	predator	CB1112	cat2(e1112)	DA	16.005	4.856	5.1354	7.48423	2.34883	1	0.29777	2.22858	0.699411
0000019_16.tif	predator	CB1112	cat2(e1112)	DA	16.762	7.057	5.1354	6.28731	1.15191	1	0.29777	1.87217	0.343005
0000019_16.tif	predator	CB1112	cat2(e1112)	DA	16.547	7.092	5.1354	6.10356	0.968168	1	0.29777	1.81746	0.288291
0000019_16.tif	predator	CB1112	cat2(e1112)	DA	12.193	10.658	5.1354	0.563777	-4.57162	0	0.29777	0.167876	-1.36129
0000019_16.tif	predator	CB1112	cat2(e1112)	DA	13.2	10.359	5.1354	1.43892	-3.69648	0	0.29777	0.428466	-1.1007
0000019_16.tif	predator	CB1112	cat2(e1112)	DA	13.436	10.95	5.1354	1.42672	-3.70868	0	0.29777	0.424834	-1.10433
0000019_16.tif	predator	CB1112	cat2(e1112)	DA	13.762	10.95	5.1354	1.74868	-3.38672	0	0.29777	0.520703	-1.00846
0000019_16.tif	predator	CB1112	cat2(e1112)	DA	12.45	12.415	5.1354	1.28711	-3.84829	0	0.29777	0.383262	-1.1459
0000019_16.tif	predator	CB1112	cat2(e1112)	DA	15.262	16.252	5.1354	5.99852	0.863127	1	0.29777	1.78618	0.257013
0000019_16.tif	predator	CB1112	cat2(e1112)	DA	15.832	17.839	5.1354	7.65183	2.51643	1	0.29777	2.27849	0.749318
0000019_16.tif	predator	CB1112	cat2(e1112)	DA	15.957	17.714	5.1354	7.60735	2.47195	1	0.29777	2.26524	0.736073
0000019_16.tif	predator	CB1112	cat2(e1112)	DA	16.047	17.276	5.1354	7.28494	2.14954	1	0.29777	2.16924	0.640069
0000019_16.tif	predator	CB1112	cat2(e1112)	DA	16.019	18.269	5.1354	8.11808	2.98268	1	0.29777	2.41732	0.888153
0000019_16.tif	predator	CB1112	cat2(e1112)	DA	16.123	20.887	5.1354	10.5177	5.38226	1	0.29777	3.13184	1.60268
0000019_16.tif	predator	CB1112	cat2(e1112)	DA	17.293	20.602	5.1354	10.7761	5.64068	1	0.29777	3.20879	1.67963
0000019_16.tif	predator	CB1112	cat2(e1112)	DA	17.411	20.186	5.1354	10.4751	5.33974	1	0.29777	3.11918	1.59002
0000019_16.tif	predator	CB1112	cat2(e1112)	DA	17.189	17.582	5.1354	8.20734	3.07194	1	0.29777	2.4439	0.914733
0000019_16.tif	predator	CB1112	cat2(e1112)	DA	19.641	17.526	5.1354	9.89726	4.76186	1	0.29777	2.94711	1.41794
0000019_16.tif	predator	CB1112	cat2(e1112)	DA	20.106	17.151	5.1354	10.0321	4.89674	1	0.29777	2.98727	1.4581
0000019_16.tif	predator	CB1112	cat2(e1112)	DA	17.28	7.252	5.1354	6.5668	1.43141	1	0.29777	1.9554	0.42623
0000019_16.tif	predator	CB1112	cat2(e1112)	DA	19.502	8.113	5.1354	8.08289	2.94749	1	0.29777	2.40684	0.877674
0000019_16.tif	predator	CB1112	cat2(e1112)	DA	20.446	8.043	5.1354	8.987	3.85161	1	0.29777	2.67606	1.14689
0000019_16.tif	predator	CB1112	cat2(e1112)	DA	20.564	7.884	5.1354	9.15394	4.01855	1	0.29777	2.72577	1.1966
0000019_16.tif	predator	CB1112	cat2(e1112)	DA	20.668	7.793	5.1354	9.28395	4.14856	1	0.29777	2.76448	1.23532
0000019_16.tif	predator	CB1112	cat2(e1112)	DA	22.87	10.859	5.1354	10.8443	5.7089	1	0.29777	3.22911	1.69994
0000019_36.tif	control	N2	wt	DA	13.917	16.896	4.81786	6.26721	1.44935	1	0.29777	1.86619	0.431572
0000019_36.tif	control	N2	wt	DA	13.981	16.863	4.81786	6.23861	1.42075	1	0.29777	1.85767	0.423057
0000019_36.tif	control	N2	wt	DA	14.335	16.925	4.81786	6.33586	1.518	1	0.29777	1.88663	0.452015
0000019_36.tif	control	N2	wt	DA	15.363	18.477	4.81786	8.04844	3.23058	1	0.29777	2.39659	0.961971
0000019_36.tif	control	N2	wt	DA	9.562	14.052	4.81786	5.22955	0.41169	1	0.29777	1.5572	0.122589
0000019_36.tif	control	N2	wt	DA	13.922	8.875	4.81786	1.80985	-3.00801	0	0.29777	0.53892	-0.895694
0000019_36.tif	control	N2	wt	DA	13.661	8.255	4.81786	2.38982	-2.42805	0	0.29777	0.711616	-0.722999
0000019_36.tif	control	N2	wt	DA	13.135	6.615	4.81786	4.04494	-0.77292	0	0.29777	1.20446	-0.230152
0000019_36.tif	control	N2	wt	DA	13.042	6.432	4.81786	4.23674	-0.581125	0	0.29777	1.26157	-0.173042
0000019_36.tif	control	N2	wt	DA	12.458	5.682	4.81786	5.0727	0.25484	1	0.29777	1.5105	0.0758837
0000019_36.tif	control	N2	wt	DA	12.359	5.292	4.81786	5.47482	0.656961	1	0.29777	1.63024	0.195623
0000019_36.tif	control	N2	wt	DA	12.604	4.688	4.81786	6.02398	1.20611	1	0.29777	1.79376	0.359145
0000019_36.tif	control	N2	wt	DA	12.708	4.547	4.81786	6.14866	1.33079	1	0.29777	1.83089	0.39627
0000019_36.tif	control	N2	wt	DA	20.582	4.693	4.81786	9.22853	4.41067	1	0.29777	2.74798	1.31337
0000019_36.tif	control	N2	wt	DA	20.734	4.825	4.81786	9.26181	4.44395	1	0.29777	2.75789	1.32327
0000019_36.tif	control	N2	wt	DA	16.38	10.564	4.81786	2.85504	-1.96282	0	0.29777	0.850145	-0.58447
0000019_36.tif	control	N2	wt	DA	17.375	15.786	4.81786	6.4254	1.60754	1	0.29777	1.91329	0.478678
0000019_36.tif	control	N2	wt	DA	17.49	15.88	4.81786	6.56966	1.7518	1	0.29777	1.95625	0.521633
0000019_36.tif	control	N2	wt	DA	20.109	13.905	4.81786	7.34776	2.5299	1	0.29777	2.18794	0.753328
0000019_36.tif	control	N2	wt	DA	20.158	13.696	4.81786	7.30181	2.48395	1	0.29777	2.17426	0.739646
0000019_36.tif	control	N2	wt	DA	20.839	12.443	4.81786	7.53174	2.71388	1	0.29777	2.24273	0.808113
0000019_36.tif	control	N2	wt	DA	22.609	10.689	4.81786	9.08313	4.26526	1	0.29777	2.70468	1.27007
00000020_8.tif	control	CB1112	cat2(e1112)	DA	3.281	11.745	5.28634	8.48302	3.19668	1	0.29777	2.52599	0.951875
00000020_8.tif	control	CB1112	cat2(e1112)	DA	3.297	11.599	5.28634	8.48253	3.19619	1	0.29777	2.52584	0.951729
00000020_8.tif	control	CB1112	cat2(e1112)	DA	5.906	5.052	5.28634	9.5047	4.21836	1	0.29777	2.83022	1.2561
00000020_8.tif	control	CB1112	cat2(e1112)	DA	6.016	5.073	5.28634	9.42106	4.13472	1	0.29777	2.80531	1.23119
00000020_8.tif	control	CB1112	cat2(e1112)	DA	7.033	19.55	5.28634	8.41153	3.12519	1	0.29777	2.5047	0.930588
00000020_8.tif	control	CB1112	cat2(e1112)	DA	6.852	19.411	5.28634	8.40018	3.11384	1	0.29777	2.50132	0.927209
00000020_8.tif	control	CB1112	cat2(e1112)	DA	6.033	18.266	5.28634	8.05324	2.7669	1	0.29777	2.39801	0.8239
00000020_8.tif	control	CB1112	cat2(e1112)	DA	7.29	12.339	5.28634	4.43991	-0.846429	0	0.29777	1.32207	-0.252041
00000020_8.tif	control	CB1112	cat2(e1112)	DA	7.116	12.193	5.28634	4.62323	-0.663105	0	0.29777	1.37666	-0.197453
00000020_8.tif	control	CB1112	cat2(e1112)	DA	7.109	12.061	5.28634	4.64277	-0.643573	0	0.29777	1.38248	-0.191637
00000020_8.tif	control	CB1112	cat2(e1112)	DA	12.03	4.102	5.28634	8.47153	3.18519	1	0.29777	2.52257	0.948454
00000020_8.tif	control	CB1112	cat2(e1112)	DA	11.37	4.54	5.28634	8.0358	2.74946	1	0.29777	2.39282	0.818707
00000020_8.tif	control	CB1112	cat2(e1112)	DA	11.064	5.193	5.28634	7.40447	2.11813	1	0.29777	2.20483	0.630717
00000020_8.tif	control	CB1112	cat2(e1112)	DA	10.418	7.13	5.28634	5.59263	0.306288	1	0.29777	1.66532	0.0912035
00000020_8.tif	control	CB1112	cat2(e1112)	DA	10.273	7.227	5.28634	5.53459	0.248251	1	0.29777	1.64803	0.0739216
00000020_8.tif	control	CB1112	cat2(e1112)	DA	12.446	13.273	5.28634	1.00911	-4.27723	0	0.29777	0.300484	-1.27363
00000020_8.tif	control	CB1112	cat2(e1112)	DA	12.488	13.321	5.28634	1.07271	-4.21363	0	0.29777	0.319421	-1.25469
00000020_8.tif	control	CB1112	cat2(e1112)	DA	12.28	11.988	5.28634	0.803453	-4.48289	0	0.29777	0.239244	-1.33487
00000020_8.tif	control	CB1112	cat2(e1112)	DA	13.46	13.113	5.28634	1.81954	-3.4668	0	0.29777	0.541804	-1.03231
00000020_8.tif	control	CB1112	cat2(e1112)	DA	13.821	13.502	5.28634	2.2956	-2.99074	0	0.29777	0.68356	-0.890553
00000020_8.tif	control	CB1112	cat2(e1112)	DA	11.571	17.012	5.28634	4.44663	-0.839706	0	0.29777	1.32407	-0.250039
00000020_8.tif	control	CB1112	cat2(e1112)	DA	11.634	17.193	5.28634	4.62588	-0.660463	0	0.29777	1.37745	-0.196666
00000020_8.tif	control	CB1112	cat2(e1112)	DA	11.821	17.325	5.28634	4.75799	-0.52835	0	0.29777	1.41679	-0.157327
00000020_8.tif	control	CB1112	cat2(e1112)	DA	18.984	16.818	5.28634	8.4125	3.12616	1	0.29777	2.50499	0.930876
00000020_8.tif	control	CB1112	cat2(e1112)	DA	19.151	15.568	5.28634	8.01001	2.72368	1	0.29777	2.38514	0.811029
00000020_8.tif	control	CB1112	cat2(e1112)	DA	19.245	15.505	5.28634	8.07412	2.78778	1	0.29777	2.40423	0.830117
00000020_8.tif	control	CB1112	cat2(e1112)	DA	19.141	13.599	5.28634	7.48831	2.20198	1	0.29777	2.2298	0.655682
00000020_8.tif	control	CB1112	cat2(e1112)	DA	18.995	13.516	5.28634	7.33254	2.0462	1	0.29777	2.18341	0.609297
00000020_8.tif	control	CB1112	cat2(e1112)	DA	18.859	13.411	5.28634	7.18463	1.89829	1	0.29777	2.13937	0.565253
00000020_8.tif	control	CB1112	cat2(e1112)	DA	19.484	13.057	5.28634	7.77539	2.48905	1	0.29777	2.31528	0.741165
00000020_8.tif	control	CB1112	cat2(e1112)	DA	19.464	12.953	5.28634	7.74957	2.46323	1	0.29777	2.30759	0.733476
00000020_8.tif	control	CB1112	cat2(e1112)	DA	19.328	12.818	5.28634	7.60811	2.32177	1	0.29777	2.26547	0.691353
00000020_8.tif	control	CB1112	cat2(e1112)	DA	19.453	12.276	5.28634	7.73451	2.44817	1	0.29777	2.30311	0.728993
00000020_8.tif	control	CB1112	cat2(e1112)	DA	18.786	11.88	5.28634	7.09543	1.8091	1	0.29777	2.11281	0.538694
00000020_8.tif	control	CB1112	cat2(e1112)	DA	20.214	9.745	5.28634	8.94703	3.6607	1	0.29777	2.66416	1.09005
00000020_8.tif	control	CB1112	cat2(e1112)	DA	19.839	8.505	5.28634	9.07531	3.78897	1	0.29777	2.70235	1.12824
00000020_8.tif	control	CB1112	cat2(e1112)	DA	19.932	8.411	5.28634	9.20065	3.91431	1	0.29777	2.73968	1.16556
00000020_8.tif	control	CB1112	cat2(e1112)	DA	20.286	8.078	5.28634	9.66788	4.38154	1	0.29777	2.87881	1.30469
00000020_8.tif	control	CB1112	cat2(e1112)	DA	20.359	7.964	5.28634	9.78571	4.49937	1	0.29777	2.91389	1.33978
0000022_24.tif	predator	CB1112	cat2(e1112)	VEH	4.438	8.948	5.14066	8.6488	3.50814	1	0.29777	2.57535	1.04462
0000022_24.tif	predator	CB1112	cat2(e1112)	VEH	4.047	9.04	5.14066	9.01215	3.87149	1	0.29777	2.68355	1.15281
0000022_24.tif	predator	CB1112	cat2(e1112)	VEH	6.686	15.53	5.14066	7.77653	2.63587	1	0.29777	2.31562	0.784883
0000022_24.tif	predator	CB1112	cat2(e1112)	VEH	8.082	15.488	5.14066	6.68853	1.54787	1	0.29777	1.99164	0.460908
0000022_24.tif	predator	CB1112	cat2(e1112)	VEH	10.759	13.214	5.14066	3.19243	-1.94823	0	0.29777	0.950611	-0.580124
0000022_24.tif	predator	CB1112	cat2(e1112)	VEH	10.523	12.47	5.14066	2.87256	-2.2681	0	0.29777	0.855363	-0.675372
0000022_24.tif	predator	CB1112	cat2(e1112)	VEH	12.759	11.908	5.14066	1.08676	-4.0539	0	0.29777	0.323604	-1.20713
0000022_24.tif	predator	CB1112	cat2(e1112)	VEH	13.356	12.332	5.14066	1.57753	-3.56313	0	0.29777	0.46974	-1.06099
0000022_24.tif	predator	CB1112	cat2(e1112)	VEH	9.321	10.571	5.14066	3.56827	-1.57239	0	0.29777	1.06252	-0.468212
0000022_24.tif	predator	CB1112	cat2(e1112)	VEH	9.773	9.842	5.14066	3.2597	-1.88096	0	0.29777	0.970641	-0.560094
0000022_24.tif	predator	CB1112	cat2(e1112)	VEH	9.759	9.696	5.14066	3.31995	-1.82071	0	0.29777	0.988581	-0.542154
0000022_24.tif	predator	CB1112	cat2(e1112)	VEH	10.168	9.161	5.14066	3.18337	-1.95729	0	0.29777	0.947912	-0.582823
0000022_24.tif	predator	CB1112	cat2(e1112)	VEH	13.418	10.946	5.14066	0.550789	-4.58987	0	0.29777	0.164008	-1.36673
0000022_24.tif	predator	CB1112	cat2(e1112)	VEH	13.606	10.557	5.14066	0.77493	-4.36573	0	0.29777	0.230751	-1.29998
0000022_24.tif	predator	CB1112	cat2(e1112)	VEH	13.641	10.481	5.14066	0.836379	-4.30428	0	0.29777	0.249049	-1.28169
0000022_24.tif	predator	CB1112	cat2(e1112)	VEH	13.661	10.023	5.14066	1.1216	-4.01906	0	0.29777	0.333979	-1.19676
0000022_24.tif	predator	CB1112	cat2(e1112)	VEH	13.627	9.78	5.14066	1.28698	-3.85368	0	0.29777	0.383224	-1.14751
0000022_24.tif	predator	CB1112	cat2(e1112)	VEH	13.057	9.238	5.14066	1.59982	-3.54084	0	0.29777	0.476379	-1.05436
0000022_24.tif	predator	CB1112	cat2(e1112)	VEH	12.724	8.981	5.14066	1.85358	-3.28709	0	0.29777	0.551939	-0.978795
0000022_24.tif	predator	CB1112	cat2(e1112)	VEH	13.585	8.061	5.14066	2.8554	-2.28526	0	0.29777	0.850253	-0.680482
0000022_24.tif	predator	CB1112	cat2(e1112)	VEH	10.682	7.158	5.14066	4.27786	-0.8628	0	0.29777	1.27382	-0.256916
0000022_24.tif	predator	CB1112	cat2(e1112)	VEH	12.432	6.394	5.14066	4.45657	-0.684087	0	0.29777	1.32703	-0.203701
0000022_24.tif	predator	CB1112	cat2(e1112)	VEH	8.946	6.297	5.14066	6.00053	0.859864	1	0.29777	1.78678	0.256042
0000022_24.tif	predator	CB1112	cat2(e1112)	VEH	14.094	6.375	5.14066	4.61552	-0.525144	0	0.29777	1.37436	-0.156372
0000022_24.tif	predator	CB1112	cat2(e1112)	VEH	14.49	9.87	5.14066	1.87346	-3.2672	0	0.29777	0.557861	-0.972874
0000022_24.tif	predator	CB1112	cat2(e1112)	VEH	14.958	7.495	5.14066	3.92772	-1.21294	0	0.29777	1.16956	-0.361178
0000022_24.tif	predator	CB1112	cat2(e1112)	VEH	14.125	12.724	5.14066	2.26822	-2.87244	0	0.29777	0.675409	-0.855326
0000022_24.tif	predator	CB1112	cat2(e1112)	VEH	13.917	12.849	5.14066	2.27152	-2.86914	0	0.29777	0.676391	-0.854344
0000022_24.tif	predator	CB1112	cat2(e1112)	VEH	16.464	7.948	5.14066	4.59777	-0.542896	0	0.29777	1.36908	-0.161658
0000022_24.tif	predator	CB1112	cat2(e1112)	VEH	15.562	8.38	5.14066	3.63123	-1.50943	0	0.29777	1.08127	-0.449464
0000022_24.tif	predator	CB1112	cat2(e1112)	VEH	15.557	8.115	5.14066	3.81139	-1.32927	0	0.29777	1.13492	-0.395817
0000023_26.tif	control	N2	wt	VEH	5.75	11.948	5.33838	8.03941	2.70103	1	0.29777	2.39389	0.804285
0000023_26.tif	control	N2	wt	VEH	5.804	12.064	5.33838	7.98967	2.65129	1	0.29777	2.37908	0.789475
0000023_26.tif	control	N2	wt	VEH	6.248	11.682	5.33838	7.53807	2.19969	1	0.29777	2.24461	0.655002
0000023_26.tif	control	N2	wt	VEH	9.998	17.828	5.33838	7.19235	1.85397	1	0.29777	2.14167	0.552058
0000023_26.tif	control	N2	wt	VEH	10.589	16.661	5.33838	5.89013	0.55175	1	0.29777	1.7539	0.164295
0000023_26.tif	control	N2	wt	VEH	10.658	16.592	5.33838	5.79476	0.456384	1	0.29777	1.72551	0.135897
0000023_26.tif	control	N2	wt	VEH	10.7	16.536	5.33838	5.72495	0.386574	1	0.29777	1.70472	0.11511
0000023_26.tif	control	N2	wt	VEH	13.13	12.477	5.33838	1.00623	-4.33215	0	0.29777	0.299626	-1.28998
0000023_26.tif	control	N2	wt	VEH	13.401	12.248	5.33838	0.658317	-4.68006	0	0.29777	0.196027	-1.39358
0000023_26.tif	control	N2	wt	VEH	10.894	10.884	5.33838	3.00875	-2.32963	0	0.29777	0.895915	-0.693694
0000023_26.tif	control	N2	wt	VEH	9.568	8.821	5.33838	5.11478	-0.223599	0	0.29777	1.52303	-0.0665809
0000023_26.tif	control	N2	wt	VEH	9.616	8.745	5.33838	5.11897	-0.219408	0	0.29777	1.52428	-0.065333
0000023_26.tif	control	N2	wt	VEH	9.172	5.043	5.33838	8.11118	2.7728	1	0.29777	2.41527	0.825657
0000023_26.tif	control	N2	wt	VEH	9.075	4.731	5.33838	8.42353	3.08515	1	0.29777	2.50827	0.918665
0000023_26.tif	control	N2	wt	VEH	8.977	4.606	5.33838	8.58197	3.24359	1	0.29777	2.55545	0.965843
0000023_26.tif	control	N2	wt	VEH	15.026	6.818	5.33838	5.05059	-0.287793	0	0.29777	1.50391	-0.085696
0000023_26.tif	control	N2	wt	VEH	15.144	6.811	5.33838	5.08759	-0.250788	0	0.29777	1.51493	-0.0746772
0000023_26.tif	control	N2	wt	VEH	15.22	6.894	5.33838	5.02879	-0.309586	0	0.29777	1.49742	-0.0921853
0000023_26.tif	control	N2	wt	VEH	15.033	12.266	5.33838	1.36371	-3.97467	0	0.29777	0.406073	-1.18354
0000023_26.tif	control	N2	wt	VEH	13.839	21.394	5.33838	9.68015	4.34177	1	0.29777	2.88246	1.29285
0000023_26.tif	control	N2	wt	VEH	18.665	18.085	5.33838	8.0246	2.68623	1	0.29777	2.38949	0.799878
0000023_26.tif	control	N2	wt	VEH	18.797	18.106	5.33838	8.12206	2.78368	1	0.29777	2.4185	0.828896
0000023_26.tif	control	N2	wt	VEH	18.366	17.564	5.33838	7.4296	2.09122	1	0.29777	2.21231	0.622702
0000023_26.tif	control	N2	wt	VEH	18.595	17.571	5.33838	7.57832	2.23994	1	0.29777	2.2566	0.666987
0000023_26.tif	control	N2	wt	VEH	18.311	16.675	5.33838	6.7147	1.37632	1	0.29777	1.99944	0.409826
0000023_26.tif	control	N2	wt	VEH	18.519	16.509	5.33838	6.73746	1.39908	1	0.29777	2.00621	0.416603
0000023_26.tif	control	N2	wt	VEH	20.165	16.738	5.33838	8.11987	2.78149	1	0.29777	2.41785	0.828243
0000023_26.tif	control	N2	wt	VEH	20.325	16.641	5.33838	8.18742	2.84904	1	0.29777	2.43797	0.848359
0000023_26.tif	control	N2	wt	VEH	17.102	14.516	5.33838	4.34132	-0.997058	0	0.29777	1.29271	-0.296894
0000023_26.tif	control	N2	wt	VEH	17.38	13.8	5.33838	4.15551	-1.18287	0	0.29777	1.23739	-0.352224
0000023_26.tif	control	N2	wt	VEH	17.325	13.62	5.33838	4.01962	-1.31876	0	0.29777	1.19692	-0.392686
0000023_26.tif	control	N2	wt	VEH	18.741	12.863	5.33838	5.08647	-0.251904	0	0.29777	1.5146	-0.0750093
0000023_26.tif	control	N2	wt	VEH	16.648	11.842	5.33838	2.86486	-2.47352	0	0.29777	0.85307	-0.736539
0000023_26.tif	control	N2	wt	VEH	18.356	11.391	5.33838	4.5814	-0.756978	0	0.29777	1.3642	-0.225405
0000023_26.tif	control	N2	wt	VEH	18.925	11.141	5.33838	5.17085	-0.167532	0	0.29777	1.53972	-0.0498861
0000023_26.tif	control	N2	wt	VEH	19.043	10.967	5.33838	5.30981	-0.0285707	0	0.29777	1.5811	-0.0085075
0000023_26.tif	control	N2	wt	VEH	18.224	10.054	5.33838	4.7383	-0.600083	0	0.29777	1.41092	-0.178687
0000023_26.tif	control	N2	wt	VEH	18.05	9.561	5.33838	4.77673	-0.561653	0	0.29777	1.42237	-0.167243
0000023_26.tif	control	N2	wt	VEH	18.168	9.269	5.33838	5.01796	-0.320416	0	0.29777	1.4942	-0.0954102
0000029_10.tif	control	CB1112	cat2(e1112)	VEH	10.797	13.031	4.70853	3.39897	-1.30956	0	0.29777	1.01211	-0.389948
0000029_10.tif	control	CB1112	cat2(e1112)	VEH	10.792	12.948	4.70853	3.38265	-1.32589	0	0.29777	1.00725	-0.39481
0000029_10.tif	control	CB1112	cat2(e1112)	VEH	11.349	13.172	4.70853	2.91828	-1.79025	0	0.29777	0.868978	-0.533082
0000029_10.tif	control	CB1112	cat2(e1112)	VEH	11.406	13.229	4.70853	2.88647	-1.82206	0	0.29777	0.859504	-0.542556
0000029_10.tif	control	CB1112	cat2(e1112)	VEH	11.453	13.359	4.70853	2.89606	-1.81247	0	0.29777	0.862359	-0.5397
0000029_10.tif	control	CB1112	cat2(e1112)	VEH	11.438	13.938	4.70853	3.19847	-1.51007	0	0.29777	0.952408	-0.449652
0000029_10.tif	control	CB1112	cat2(e1112)	VEH	11.391	12.682	4.70853	2.73923	-1.9693	0	0.29777	0.81566	-0.5864
0000029_10.tif	control	CB1112	cat2(e1112)	VEH	11.667	12.484	4.70853	2.43264	-2.2759	0	0.29777	0.724366	-0.677694
0000029_10.tif	control	CB1112	cat2(e1112)	VEH	11.661	12.458	4.70853	2.43488	-2.27365	0	0.29777	0.725034	-0.677026
0000029_10.tif	control	CB1112	cat2(e1112)	VEH	12.693	12.724	4.70853	1.50439	-3.20414	0	0.29777	0.447963	-0.954097
0000029_10.tif	control	CB1112	cat2(e1112)	VEH	12.771	12.724	4.70853	1.43318	-3.27535	0	0.29777	0.426758	-0.975302
0000029_10.tif	control	CB1112	cat2(e1112)	VEH	13.198	12.995	4.70853	1.23391	-3.47463	0	0.29777	0.36742	-1.03464
0000029_10.tif	control	CB1112	cat2(e1112)	VEH	13.547	11.708	4.70853	0.671241	-4.03729	0	0.29777	0.199876	-1.20218
0000029_10.tif	control	CB1112	cat2(e1112)	VEH	13.49	11.604	4.70853	0.781876	-3.92666	0	0.29777	0.232819	-1.16924
0000029_10.tif	control	CB1112	cat2(e1112)	VEH	13.354	11.578	4.70853	0.903421	-3.80511	0	0.29777	0.269012	-1.13305
0000029_10.tif	control	CB1112	cat2(e1112)	VEH	11.922	10.49	4.70853	2.70186	-2.00668	0	0.29777	0.804532	-0.597528
0000029_10.tif	control	CB1112	cat2(e1112)	VEH	13.505	10.505	4.70853	1.71669	-2.99184	0	0.29777	0.511179	-0.890881
0000029_10.tif	control	CB1112	cat2(e1112)	VEH	13.521	10.594	4.70853	1.62747	-3.08106	0	0.29777	0.484612	-0.917448
0000029_10.tif	control	CB1112	cat2(e1112)	VEH	14.266	10.552	4.70853	1.5848	-3.12374	0	0.29777	0.471905	-0.930155
0000029_10.tif	control	CB1112	cat2(e1112)	VEH	13.87	9.667	4.70853	2.46637	-2.24216	0	0.29777	0.734411	-0.667649
0000029_10.tif	control	CB1112	cat2(e1112)	VEH	13.969	8.672	4.70853	3.45457	-1.25397	0	0.29777	1.02867	-0.373394
0000029_10.tif	control	CB1112	cat2(e1112)	VEH	15.583	8.484	4.70853	3.9417	-0.766835	0	0.29777	1.17372	-0.228341
0000029_10.tif	control	CB1112	cat2(e1112)	VEH	15.141	10.464	4.70853	1.97473	-2.73381	0	0.29777	0.588014	-0.814046
0000029_10.tif	control	CB1112	cat2(e1112)	VEH	15.245	10.51	4.70853	1.99545	-2.71309	0	0.29777	0.594184	-0.807876
0000029_10.tif	control	CB1112	cat2(e1112)	VEH	16.365	10.073	4.70853	3.07636	-1.63218	0	0.29777	0.916047	-0.486013
0000029_10.tif	control	CB1112	cat2(e1112)	VEH	16.214	11.417	4.70853	2.25503	-2.45351	0	0.29777	0.671479	-0.730581
0000029_10.tif	control	CB1112	cat2(e1112)	VEH	15.672	12.276	4.70853	1.60611	-3.10242	0	0.29777	0.478253	-0.923807
0000029_10.tif	control	CB1112	cat2(e1112)	VEH	15.672	12.37	4.70853	1.61766	-3.09087	0	0.29777	0.481691	-0.920369
0000029_10.tif	control	CB1112	cat2(e1112)	VEH	15.104	14.448	4.70853	2.54151	-2.16702	0	0.29777	0.756786	-0.645273
0000029_10.tif	control	CB1112	cat2(e1112)	VEH	15.026	14.688	4.70853	2.73444	-1.97409	0	0.29777	0.814235	-0.587825
0000029_10.tif	control	CB1112	cat2(e1112)	VEH	14.745	14.115	4.70853	2.1004	-2.60813	0	0.29777	0.625436	-0.776624
0000029_10.tif	control	CB1112	cat2(e1112)	VEH	17.411	14.885	4.70853	4.33126	-0.37727	0	0.29777	1.28972	-0.11234
0000029_10.tif	control	CB1112	cat2(e1112)	VEH	14.172	16.203	4.70853	4.0792	-0.629332	0	0.29777	1.21466	-0.187396
0000034_46.tif	predator	N2	wt	VEH	5.885	9.135	5.60431	9.62958	4.02527	1	0.29777	2.8674	1.19861
0000034_46.tif	predator	N2	wt	VEH	6.939	8.957	5.60431	8.67902	3.07471	1	0.29777	2.58435	0.915558
0000034_46.tif	predator	N2	wt	VEH	7.759	10.214	5.60431	7.54712	1.94281	1	0.29777	2.24731	0.57851
0000034_46.tif	predator	N2	wt	VEH	6.359	10.245	5.60431	8.9148	3.31049	1	0.29777	2.65456	0.985765
0000034_46.tif	predator	N2	wt	VEH	5.62	10.521	5.60431	9.60218	3.99787	1	0.29777	2.85924	1.19045
0000034_46.tif	predator	N2	wt	VEH	4.745	10.682	5.60431	10.4513	4.84696	1	0.29777	3.11207	1.44328
0000034_46.tif	predator	N2	wt	VEH	6.208	12.573	5.60431	8.95938	3.35507	1	0.29777	2.66783	0.999039
0000034_46.tif	predator	N2	wt	VEH	7.7	14.998	5.60431	8.08887	2.48456	1	0.29777	2.40862	0.739828
0000034_46.tif	predator	N2	wt	VEH	14.47	2.314	5.60431	9.52125	3.91694	1	0.29777	2.83514	1.16635
0000034_46.tif	predator	N2	wt	VEH	14.762	10.592	5.60431	1.27575	-4.32856	0	0.29777	0.379879	-1.28892
0000034_46.tif	predator	N2	wt	VEH	14.748	10.696	5.60431	1.1812	-4.42311	0	0.29777	0.351725	-1.31707
0000034_46.tif	predator	N2	wt	VEH	17.918	18.623	5.60431	7.35764	1.75333	1	0.29777	2.19088	0.522088
0000034_46.tif	predator	N2	wt	VEH	20.905	8.543	5.60431	6.63169	1.02738	1	0.29777	1.97472	0.305922
0000034_46.tif	predator	N2	wt	VEH	17.655	7.939	5.60431	4.62066	-0.983645	0	0.29777	1.37589	-0.2929
0000034_46.tif	predator	N2	wt	VEH	18.495	7.314	5.60431	5.61441	0.0101019	1	0.29777	1.6718	0.00300806
0000034_46.tif	predator	N2	wt	VEH	20.613	7.37	5.60431	7.05265	1.44834	1	0.29777	2.10007	0.431272
0000034_46.tif	predator	N2	wt	VEH	20.641	7.203	5.60431	7.18045	1.57615	1	0.29777	2.13812	0.469329
0000034_46.tif	predator	N2	wt	VEH	22.498	7.856	5.60431	8.35845	2.75414	1	0.29777	2.4889	0.820101
0000034_46.tif	predator	N2	wt	VEH	24.22	11.623	5.60431	9.08697	3.48266	1	0.29777	2.70583	1.03703
0000034_46.tif	predator	N2	wt	VEH	23.429	11.373	5.60431	8.30561	2.7013	1	0.29777	2.47316	0.804367
0000036_38.tif	predator	N2	wt	DA	2.615	8.964	4.81786	10.1826	5.36477	1	0.29777	3.03208	1.59747
0000036_38.tif	predator	N2	wt	DA	2.594	9.177	4.81786	10.1256	5.30772	1	0.29777	3.0151	1.58048
0000036_38.tif	predator	N2	wt	DA	4.068	12.281	4.81786	8.02224	3.20438	1	0.29777	2.38878	0.954168
0000036_38.tif	predator	N2	wt	DA	2.74	13.219	4.81786	9.35111	4.53325	1	0.29777	2.78448	1.34987
0000036_38.tif	predator	N2	wt	DA	2.828	13.141	4.81786	9.25939	4.44153	1	0.29777	2.75717	1.32256
0000036_38.tif	predator	N2	wt	DA	2.854	13.297	4.81786	9.24178	4.42392	1	0.29777	2.75192	1.31731
0000036_38.tif	predator	N2	wt	DA	3.526	13.917	4.81786	8.63481	3.81695	1	0.29777	2.57119	1.13657
0000036_38.tif	predator	N2	wt	DA	3.693	13.901	4.81786	8.4672	3.64934	1	0.29777	2.52128	1.08666
0000036_38.tif	predator	N2	wt	DA	4.823	15.344	4.81786	7.71359	2.89573	1	0.29777	2.29687	0.86226
0000036_38.tif	predator	N2	wt	DA	6.333	17.51	4.81786	7.47735	2.65949	1	0.29777	2.22653	0.791917
0000036_38.tif	predator	N2	wt	DA	6.214	17.484	4.81786	7.55275	2.73489	1	0.29777	2.24898	0.814369
0000036_38.tif	predator	N2	wt	DA	6.094	17.318	4.81786	7.54408	2.72621	1	0.29777	2.2464	0.811785
0000036_38.tif	predator	N2	wt	DA	7.667	10.766	4.81786	4.82604	0.00818045	1	0.29777	1.43705	0.00243589
0000036_38.tif	predator	N2	wt	DA	8.833	9.953	4.81786	4.26714	-0.550724	0	0.29777	1.27063	-0.163989
0000036_38.tif	predator	N2	wt	DA	8.833	9.839	4.81786	4.34203	-0.475829	0	0.29777	1.29293	-0.141688
0000036_38.tif	predator	N2	wt	DA	9.016	10.417	4.81786	3.83381	-0.984053	0	0.29777	1.14159	-0.293021
0000036_38.tif	predator	N2	wt	DA	6.323	10.484	4.81786	6.17557	1.3577	1	0.29777	1.8389	0.404284
0000036_38.tif	predator	N2	wt	DA	7.036	4.271	4.81786	9.84251	5.02465	1	0.29777	2.9308	1.49619
0000036_38.tif	predator	N2	wt	DA	6.927	4.073	4.81786	10.0684	5.25053	1	0.29777	2.99807	1.56345
0000036_38.tif	predator	N2	wt	DA	7.349	3.849	4.81786	10.0563	5.23843	1	0.29777	2.99446	1.55985
0000036_38.tif	predator	N2	wt	DA	7.135	3.714	4.81786	10.2768	5.45897	1	0.29777	3.06013	1.62552
0000036_38.tif	predator	N2	wt	DA	10.062	12.448	4.81786	2.03481	-2.78306	0	0.29777	0.605904	-0.828711
0000036_38.tif	predator	N2	wt	DA	10.13	12.849	4.81786	1.95201	-2.86586	0	0.29777	0.581249	-0.853366
0000036_38.tif	predator	N2	wt	DA	9.552	12.245	4.81786	2.57101	-2.24685	0	0.29777	0.765571	-0.669044
0000036_38.tif	predator	N2	wt	DA	12.583	21.641	4.81786	8.93129	4.11343	1	0.29777	2.65947	1.22486
0000036_38.tif	predator	N2	wt	DA	11.406	21.234	4.81786	8.53649	3.71863	1	0.29777	2.54191	1.1073
0000036_38.tif	predator	N2	wt	DA	11.214	21.057	4.81786	8.37767	3.55981	1	0.29777	2.49462	1.06
0000036_38.tif	predator	N2	wt	DA	11.214	20.958	4.81786	8.27921	3.46134	1	0.29777	2.4653	1.03068
0000036_38.tif	predator	N2	wt	DA	10.953	20.286	4.81786	7.64523	2.82736	1	0.29777	2.27652	0.841904
0000036_38.tif	predator	N2	wt	DA	14.953	21.255	4.81786	9.00242	4.18456	1	0.29777	2.68065	1.24604
0000036_38.tif	predator	N2	wt	DA	17.958	18.073	4.81786	7.94897	3.13111	1	0.29777	2.36697	0.932351
0000036_38.tif	predator	N2	wt	DA	18.599	18.104	4.81786	8.45387	3.636	1	0.29777	2.51731	1.08269
0000036_38.tif	predator	N2	wt	DA	17.818	18.604	4.81786	8.21718	3.39932	1	0.29777	2.44683	1.01221
0000036_38.tif	predator	N2	wt	DA	17.276	19.531	4.81786	8.56472	3.74686	1	0.29777	2.55032	1.1157
0000036_38.tif	predator	N2	wt	DA	17.625	19.573	4.81786	8.81351	3.99565	1	0.29777	2.6244	1.18978
0000037_34.tif	control	N2	wt	VEH	7.141	10.302	4.7971	7.81017	3.01307	1	0.29777	2.32563	0.897201
0000037_34.tif	control	N2	wt	VEH	5.359	11.443	4.7971	9.39333	4.59623	1	0.29777	2.79705	1.36862
0000037_34.tif	control	N2	wt	VEH	7.948	11.708	4.7971	6.79187	1.99476	1	0.29777	2.02241	0.593981
0000037_34.tif	control	N2	wt	VEH	6.948	12.896	4.7971	7.80963	3.01253	1	0.29777	2.32547	0.89704
0000037_34.tif	control	N2	wt	VEH	6.807	13.052	4.7971	7.96576	3.16865	1	0.29777	2.37196	0.94353
0000037_34.tif	control	N2	wt	VEH	6.823	15.557	4.7971	8.59558	3.79848	1	0.29777	2.55951	1.13107
0000037_34.tif	control	N2	wt	VEH	7.786	15.396	4.7971	7.65049	2.85339	1	0.29777	2.27809	0.849653
0000037_34.tif	control	N2	wt	VEH	8.927	14.557	4.7971	6.26845	1.47134	1	0.29777	1.86656	0.438122
0000037_34.tif	control	N2	wt	VEH	9.536	19.542	4.7971	9.01289	4.21579	1	0.29777	2.68377	1.25534
0000037_34.tif	control	N2	wt	VEH	11.307	20.661	4.7971	9.1509	4.3538	1	0.29777	2.72486	1.29643
0000037_34.tif	control	N2	wt	VEH	12.958	20.339	4.7971	8.35576	3.55865	1	0.29777	2.48809	1.05966
0000037_34.tif	control	N2	wt	VEH	12.802	20.198	4.7971	8.25292	3.45582	1	0.29777	2.45747	1.02904
0000037_34.tif	control	N2	wt	VEH	12.589	19.922	4.7971	8.0387	3.2416	1	0.29777	2.39368	0.96525
0000037_34.tif	control	N2	wt	VEH	12.906	19.562	4.7971	7.61034	2.81323	1	0.29777	2.26613	0.837696
0000037_34.tif	control	N2	wt	VEH	13.161	19.604	4.7971	7.59458	2.79747	1	0.29777	2.26144	0.833003
0000037_34.tif	control	N2	wt	VEH	11.656	19.703	4.7971	8.13195	3.33484	1	0.29777	2.42145	0.993016
0000037_34.tif	control	N2	wt	VEH	11.557	19.333	4.7971	7.83006	3.03295	1	0.29777	2.33156	0.903123
0000037_34.tif	control	N2	wt	VEH	12.724	15.557	4.7971	3.93169	-0.86541	0	0.29777	1.17074	-0.257693
0000037_34.tif	control	N2	wt	VEH	11.88	14.812	4.7971	3.88046	-0.916649	0	0.29777	1.15548	-0.272951
0000037_34.tif	control	N2	wt	VEH	11.802	14.734	4.7971	3.88612	-0.910985	0	0.29777	1.15717	-0.271264
0000037_34.tif	control	N2	wt	VEH	11.255	14.406	4.7971	4.1261	-0.671003	0	0.29777	1.22863	-0.199804
0000037_34.tif	control	N2	wt	VEH	11.25	14.312	4.7971	4.08023	-0.716875	0	0.29777	1.21497	-0.213464
0000037_34.tif	control	N2	wt	VEH	11.245	13.797	4.7971	3.8398	-0.957304	0	0.29777	1.14338	-0.285057
0000037_34.tif	control	N2	wt	VEH	10.708	13.693	4.7971	4.29438	-0.502725	0	0.29777	1.27874	-0.149696
0000037_34.tif	control	N2	wt	VEH	10.729	13.594	4.7971	4.24053	-0.556573	0	0.29777	1.2627	-0.165731
0000037_34.tif	control	N2	wt	VEH	12.089	10.99	4.7971	2.88797	-1.90914	0	0.29777	0.85995	-0.568484
0000037_34.tif	control	N2	wt	VEH	13.219	10.922	4.7971	1.95641	-2.8407	0	0.29777	0.582559	-0.845875
0000037_34.tif	control	N2	wt	VEH	13.281	10.891	4.7971	1.92956	-2.86754	0	0.29777	0.574566	-0.853868
0000037_34.tif	control	N2	wt	VEH	12.63	9.51	4.7971	3.3869	-1.41021	0	0.29777	1.00852	-0.419917
0000037_34.tif	control	N2	wt	VEH	12.307	9.052	4.7971	3.94668	-0.850424	0	0.29777	1.1752	-0.253231
0000037_34.tif	control	N2	wt	VEH	14.516	2.875	4.7971	9.29933	4.50222	1	0.29777	2.76906	1.34063
0000037_34.tif	control	N2	wt	VEH	16.714	3.245	4.7971	9.14612	4.34901	1	0.29777	2.72344	1.295
0000037_34.tif	control	N2	wt	VEH	16.885	3.286	4.7971	9.14499	4.34789	1	0.29777	2.7231	1.29467
0000037_34.tif	control	N2	wt	VEH	13.698	11.057	4.7971	1.51522	-3.28188	0	0.29777	0.451188	-0.977246
0000037_34.tif	control	N2	wt	VEH	14.271	11.693	4.7971	0.65928	-4.13782	0	0.29777	0.196314	-1.23212
0000037_34.tif	control	N2	wt	VEH	15.443	11.469	4.7971	1.00557	-3.79154	0	0.29777	0.299428	-1.12901
0000037_34.tif	control	N2	wt	VEH	14.339	12.88	4.7971	0.805909	-3.9912	0	0.29777	0.239975	-1.18846
0000037_34.tif	control	N2	wt	VEH	16.562	13.323	4.7971	2.16865	-2.62845	0	0.29777	0.645759	-0.782675
0000037_34.tif	control	N2	wt	VEH	16.656	13.307	4.7971	2.24073	-2.55638	0	0.29777	0.667221	-0.761213
0000037_34.tif	control	N2	wt	VEH	18.271	19.146	4.7971	7.82419	3.02708	1	0.29777	2.32981	0.901374
0000037_34.tif	control	N2	wt	VEH	18.406	18.99	4.7971	7.74869	2.95159	1	0.29777	2.30733	0.878895
0000037_34.tif	control	N2	wt	VEH	20.214	10.458	4.7971	5.75134	0.954234	1	0.29777	1.71258	0.284142
0000037_34.tif	control	N2	wt	VEH	20.12	10.333	4.7971	5.70077	0.903662	1	0.29777	1.69752	0.269083
0000037_34.tif	control	N2	wt	VEH	21.422	3.396	4.7971	11.04	6.24289	1	0.29777	3.28738	1.85894
0000037_34.tif	control	N2	wt	VEH	21.474	3.24	4.7971	11.1957	6.39857	1	0.29777	3.33374	1.9053
0000037_34.tif	control	N2	wt	VEH	20.745	2.818	4.7971	11.1243	6.32718	1	0.29777	3.31248	1.88405
0000037_34.tif	control	N2	wt	VEH	20.573	2.729	4.7971	11.1077	6.3106	1	0.29777	3.30754	1.87911
0000038_40.tif	predator	N2	wt	DA	11.99	18.667	5.00529	7.64873	2.64344	1	0.29777	2.27756	0.787137
0000038_40.tif	predator	N2	wt	DA	11.839	18.533	5.00529	7.56218	2.55689	1	0.29777	2.25179	0.761365
0000038_40.tif	predator	N2	wt	DA	9.45	14.158	5.00529	5.40525	0.399962	1	0.29777	1.60952	0.119097
0000038_40.tif	predator	N2	wt	DA	9.45	13.887	5.00529	5.26683	0.261543	1	0.29777	1.5683	0.0778796
0000038_40.tif	predator	N2	wt	DA	11.089	6.377	5.00529	5.73509	0.729799	1	0.29777	1.70774	0.217312
0000038_40.tif	predator	N2	wt	DA	11.505	6.03	5.00529	5.84356	0.838278	1	0.29777	1.74004	0.249614
0000038_40.tif	predator	N2	wt	DA	10.977	4.547	5.00529	7.4108	2.40551	1	0.29777	2.20671	0.71629
0000038_40.tif	predator	N2	wt	DA	13.047	3.422	5.00529	7.93686	2.93157	1	0.29777	2.36336	0.872934
0000038_40.tif	predator	N2	wt	DA	17.05	2.175	5.00529	9.60703	4.60175	1	0.29777	2.86069	1.37026
0000038_40.tif	predator	N2	wt	DA	17.155	2.189	5.00529	9.62724	4.62196	1	0.29777	2.8667	1.37628
0000038_40.tif	predator	N2	wt	DA	15.217	11.606	5.00529	1.22075	-3.78453	0	0.29777	0.363504	-1.12692
0000038_40.tif	predator	N2	wt	DA	16.398	12.453	5.00529	2.62971	-2.37558	0	0.29777	0.783049	-0.707375
0000038_40.tif	predator	N2	wt	DA	16.849	12.259	5.00529	2.97295	-2.03234	0	0.29777	0.885254	-0.60517
0000038_40.tif	predator	N2	wt	DA	16.717	15.37	5.00529	4.87618	-0.129111	0	0.29777	1.45198	-0.0384455
0000038_40.tif	predator	N2	wt	DA	16.849	16.002	5.00529	5.48179	0.4765	1	0.29777	1.63231	0.141888
0000038_40.tif	predator	N2	wt	DA	17.877	15.655	5.00529	5.80908	0.803796	1	0.29777	1.72977	0.239346
0000038_40.tif	predator	N2	wt	DA	17.891	15.377	5.00529	5.61315	0.607861	1	0.29777	1.67143	0.181003
0000038_40.tif	predator	N2	wt	DA	16.661	17.095	5.00529	6.36454	1.35926	1	0.29777	1.89517	0.404746
0000038_40.tif	predator	N2	wt	DA	16.155	16.95	5.00529	6.0371	1.03181	1	0.29777	1.79767	0.307243
0000038_40.tif	predator	N2	wt	DA	15.766	16.894	5.00529	5.85827	0.852981	1	0.29777	1.74442	0.253992
0000038_40.tif	predator	N2	wt	DA	15.668	16.727	5.00529	5.66995	0.664662	1	0.29777	1.68834	0.197916
0000038_40.tif	predator	N2	wt	DA	15.821	17.658	5.00529	6.6067	1.60142	1	0.29777	1.96728	0.476854
0000038_40.tif	predator	N2	wt	DA	16.314	17.595	5.00529	6.69732	1.69203	1	0.29777	1.99426	0.503837
0000038_40.tif	predator	N2	wt	DA	16.724	18.082	5.00529	7.29805	2.29277	1	0.29777	2.17314	0.682717
0000038_40.tif	predator	N2	wt	DA	16.161	18.686	5.00529	7.68849	2.68321	1	0.29777	2.2894	0.798979
0000038_40.tif	predator	N2	wt	DA	15.87	19.901	5.00529	8.79729	3.79201	1	0.29777	2.61957	1.12915
0000038_40.tif	predator	N2	wt	DA	20.755	17.505	5.00529	9.14791	4.14262	1	0.29777	2.72397	1.23355
0000038_40.tif	predator	N2	wt	DA	20.943	17.47	5.00529	9.26351	4.25822	1	0.29777	2.75839	1.26797
0000038_40.tif	predator	N2	wt	DA	20.123	14.908	5.00529	7.07749	2.0722	1	0.29777	2.10746	0.61704
0000038_40.tif	predator	N2	wt	DA	20.589	12.512	5.00529	6.66469	1.6594	1	0.29777	1.98454	0.494119
0000038_40.tif	predator	N2	wt	DA	20.637	12.207	5.00529	6.66343	1.65814	1	0.29777	1.98417	0.493745
0000038_40.tif	predator	N2	wt	DA	22.894	10.873	5.00529	8.86814	3.86285	1	0.29777	2.64067	1.15024
0000038_40.tif	predator	N2	wt	DA	22.422	11.005	5.00529	8.39108	3.3858	1	0.29777	2.49861	1.00819
0000038_40.tif	predator	N2	wt	DA	22.214	10.929	5.00529	8.18628	3.18099	1	0.29777	2.43763	0.947203
0000038_40.tif	predator	N2	wt	DA	22.005	10.845	5.00529	7.98181	2.97652	1	0.29777	2.37674	0.886319
0000038_40.tif	predator	N2	wt	DA	21.964	10.72	5.00529	7.94897	2.94368	1	0.29777	2.36696	0.87654
0000038_40.tif	predator	N2	wt	DA	18.651	7.648	5.00529	5.88332	0.878031	1	0.29777	1.75188	0.261451
00000040_4.tif	control	CB1112	cat2(e1112)	DA	13.328	17.901	4.92706	6.64884	1.72178	1	0.29777	1.97983	0.512696
00000040_4.tif	control	CB1112	cat2(e1112)	DA	13.562	12.094	4.92706	1.37284	-3.55422	0	0.29777	0.40879	-1.05834
00000040_4.tif	control	CB1112	cat2(e1112)	DA	12.953	12.234	4.92706	1.97858	-2.94847	0	0.29777	0.589163	-0.877967
00000040_4.tif	control	CB1112	cat2(e1112)	DA	12.797	11.948	4.92706	2.02681	-2.90024	0	0.29777	0.603524	-0.863606
00000040_4.tif	control	CB1112	cat2(e1112)	DA	11.557	7.776	4.92706	4.83448	-0.0925832	0	0.29777	1.43956	-0.0275685
00000040_4.tif	control	CB1112	cat2(e1112)	DA	9.734	3.047	4.92706	9.74849	4.82144	1	0.29777	2.90281	1.43568
00000040_4.tif	control	CB1112	cat2(e1112)	DA	13.802	2.984	4.92706	8.47519	3.54813	1	0.29777	2.52366	1.05653
00000040_4.tif	control	CB1112	cat2(e1112)	DA	13.807	2.797	4.92706	8.66049	3.73343	1	0.29777	2.57883	1.1117
00000040_4.tif	control	CB1112	cat2(e1112)	DA	16.151	10.021	4.92706	1.97003	-2.95703	0	0.29777	0.586616	-0.880514
00000040_4.tif	control	CB1112	cat2(e1112)	DA	16.245	10.094	4.92706	1.98906	-2.938	0	0.29777	0.592283	-0.874847
00000040_4.tif	control	CB1112	cat2(e1112)	DA	18.094	9.839	4.92706	3.69294	-1.23412	0	0.29777	1.09965	-0.367483
00000040_4.tif	control	CB1112	cat2(e1112)	DA	18.047	9.708	4.92706	3.70856	-1.2185	0	0.29777	1.1043	-0.362832
00000040_4.tif	control	CB1112	cat2(e1112)	DA	17.953	9.562	4.92706	3.69588	-1.23118	0	0.29777	1.10052	-0.366607
00000040_4.tif	control	CB1112	cat2(e1112)	DA	18.255	13.094	4.92706	3.89029	-1.03677	0	0.29777	1.15841	-0.308718
00000040_4.tif	control	CB1112	cat2(e1112)	DA	18.391	13.484	4.92706	4.19225	-0.734808	0	0.29777	1.24833	-0.218804
00000040_4.tif	control	CB1112	cat2(e1112)	DA	18.49	13.51	4.92706	4.2912	-0.635856	0	0.29777	1.27779	-0.189339
00000040_4.tif	control	CB1112	cat2(e1112)	DA	15.422	15.031	4.92706	3.68676	-1.2403	0	0.29777	1.09781	-0.369323
00000040_4.tif	control	CB1112	cat2(e1112)	DA	16.604	14.219	4.92706	3.36902	-1.55804	0	0.29777	1.00319	-0.463938
00000040_4.tif	control	CB1112	cat2(e1112)	DA	16.818	14.156	4.92706	3.4408	-1.48626	0	0.29777	1.02457	-0.442562
00000040_4.tif	control	CB1112	cat2(e1112)	DA	17.12	14.161	4.92706	3.63413	-1.29292	0	0.29777	1.08214	-0.384994
00000040_4.tif	control	CB1112	cat2(e1112)	DA	17.776	14.484	4.92706	4.31634	-0.610722	0	0.29777	1.28528	-0.181855
00000040_4.tif	control	CB1112	cat2(e1112)	DA	18.698	14.87	4.92706	5.25224	0.325179	1	0.29777	1.56396	0.0968286
00000040_4.tif	control	CB1112	cat2(e1112)	DA	18.807	14.865	4.92706	5.33141	0.404351	1	0.29777	1.58753	0.120404
00000040_4.tif	control	CB1112	cat2(e1112)	DA	17.505	15.016	4.92706	4.54116	-0.385899	0	0.29777	1.35222	-0.114909
00000040_4.tif	control	CB1112	cat2(e1112)	DA	16.797	15.26	4.92706	4.36389	-0.56317	0	0.29777	1.29944	-0.167695
00000040_4.tif	control	CB1112	cat2(e1112)	DA	16.625	15.26	4.92706	4.2859	-0.641158	0	0.29777	1.27621	-0.190918
00000040_4.tif	control	CB1112	cat2(e1112)	DA	21.901	11.578	4.92706	7.15307	2.22601	1	0.29777	2.12997	0.662839
00000040_4.tif	control	CB1112	cat2(e1112)	DA	20.479	10.995	4.92706	5.74372	0.816665	1	0.29777	1.71031	0.243178
00000040_4.tif	control	CB1112	cat2(e1112)	DA	20.495	10.411	4.92706	5.83053	0.903469	1	0.29777	1.73616	0.269026
00000040_4.tif	control	CB1112	cat2(e1112)	DA	20.005	7.292	4.92706	6.67383	1.74677	1	0.29777	1.98727	0.520137
00000040_4.tif	control	CB1112	cat2(e1112)	DA	23.217	9.995	4.92706	8.58376	3.65671	1	0.29777	2.55599	1.08886
00000040_4.tif	control	CB1112	cat2(e1112)	DA	24.099	10.106	4.92706	9.43895	4.51189	1	0.29777	2.81064	1.34351
00000040_4.tif	control	CB1112	cat2(e1112)	DA	23.724	15.741	4.92706	9.96619	5.03913	1	0.29777	2.96763	1.5005
00000040_4.tif	control	CB1112	cat2(e1112)	DA	24.189	17.172	4.92706	11.0608	6.13375	1	0.29777	3.29358	1.82645
00000040_6.tif	control	CB1112	cat2(e1112)	VEH	11.906	8.474	4.94795	4.04075	-0.907199	0	0.29777	1.20321	-0.270137
00000040_6.tif	control	CB1112	cat2(e1112)	VEH	11.88	8.547	4.94795	4.01436	-0.933587	0	0.29777	1.19536	-0.277994
00000040_6.tif	control	CB1112	cat2(e1112)	VEH	12	7.849	4.94795	4.40388	-0.544064	0	0.29777	1.31134	-0.162006
00000040_6.tif	control	CB1112	cat2(e1112)	VEH	13.219	7.198	4.94795	4.26469	-0.683255	0	0.29777	1.2699	-0.203453
00000040_6.tif	control	CB1112	cat2(e1112)	VEH	13.349	7.229	4.94795	4.18356	-0.76439	0	0.29777	1.24574	-0.227613
00000040_6.tif	control	CB1112	cat2(e1112)	VEH	13.078	8.964	4.94795	2.85341	-2.09453	0	0.29777	0.849661	-0.623689
00000040_6.tif	control	CB1112	cat2(e1112)	VEH	10.953	9.589	4.94795	4.31051	-0.63744	0	0.29777	1.28354	-0.18981
00000040_6.tif	control	CB1112	cat2(e1112)	VEH	10.932	9.646	4.94795	4.31103	-0.636919	0	0.29777	1.28369	-0.189655
00000040_6.tif	control	CB1112	cat2(e1112)	VEH	11.297	9.776	4.94795	3.92357	-1.02437	0	0.29777	1.16832	-0.305028
00000040_6.tif	control	CB1112	cat2(e1112)	VEH	11.099	9.969	4.94795	4.05421	-0.893736	0	0.29777	1.20722	-0.266128
00000040_6.tif	control	CB1112	cat2(e1112)	VEH	12.469	10.354	4.94795	2.63114	-2.3168	0	0.29777	0.783476	-0.689874
00000040_6.tif	control	CB1112	cat2(e1112)	VEH	12.552	10.417	4.94795	2.53437	-2.41357	0	0.29777	0.75466	-0.71869
00000040_6.tif	control	CB1112	cat2(e1112)	VEH	11.286	10.703	4.94795	3.73238	-1.21556	0	0.29777	1.11139	-0.361958
00000040_6.tif	control	CB1112	cat2(e1112)	VEH	13.453	11.219	4.94795	1.55387	-3.39407	0	0.29777	0.462697	-1.01065
00000040_6.tif	control	CB1112	cat2(e1112)	VEH	11.651	12.208	4.94795	3.5361	-1.41184	0	0.29777	1.05295	-0.420404
00000040_6.tif	control	CB1112	cat2(e1112)	VEH	11.646	12.271	4.94795	3.56153	-1.38641	0	0.29777	1.06052	-0.412832
00000040_6.tif	control	CB1112	cat2(e1112)	VEH	12.151	12.745	4.94795	3.30339	-1.64456	0	0.29777	0.98365	-0.489699
00000040_6.tif	control	CB1112	cat2(e1112)	VEH	11.87	13.047	4.94795	3.70048	-1.24746	0	0.29777	1.10189	-0.371457
00000040_6.tif	control	CB1112	cat2(e1112)	VEH	13.036	13.036	4.94795	2.77681	-2.17114	0	0.29777	0.82685	-0.6465
00000040_6.tif	control	CB1112	cat2(e1112)	VEH	12.932	12.781	4.94795	2.68214	-2.2658	0	0.29777	0.798662	-0.674688
00000040_6.tif	control	CB1112	cat2(e1112)	VEH	13.828	13.823	4.94795	2.98933	-1.95862	0	0.29777	0.890132	-0.583218
00000040_6.tif	control	CB1112	cat2(e1112)	VEH	13.87	13.729	4.94795	2.88639	-2.06156	0	0.29777	0.85948	-0.61387
00000040_6.tif	control	CB1112	cat2(e1112)	VEH	15.859	13.318	4.94795	2.40373	-2.54422	0	0.29777	0.715758	-0.757592
00000040_6.tif	control	CB1112	cat2(e1112)	VEH	16.635	15.568	4.94795	4.78312	-0.164824	0	0.29777	1.42427	-0.0490798
00000040_6.tif	control	CB1112	cat2(e1112)	VEH	16.714	15.557	4.94795	4.80042	-0.147524	0	0.29777	1.42942	-0.0439282
00000040_6.tif	control	CB1112	cat2(e1112)	VEH	15.073	11.958	4.94795	0.888006	-4.05994	0	0.29777	0.264421	-1.20893
00000040_6.tif	control	CB1112	cat2(e1112)	VEH	14.667	11.755	4.94795	0.758955	-4.18899	0	0.29777	0.225994	-1.24736
00000040_6.tif	control	CB1112	cat2(e1112)	VEH	15.698	11.646	4.94795	0.903069	-4.04488	0	0.29777	0.268907	-1.20444
00000040_6.tif	control	CB1112	cat2(e1112)	VEH	15.781	11.516	4.94795	0.897892	-4.05005	0	0.29777	0.267365	-1.20598
00000040_6.tif	control	CB1112	cat2(e1112)	VEH	15.104	10.948	4.94795	0.162607	-4.78534	0	0.29777	0.0484195	-1.42493
00000040_6.tif	control	CB1112	cat2(e1112)	VEH	16.677	9.286	4.94795	2.45065	-2.49729	0	0.29777	0.729731	-0.743619
00000040_6.tif	control	CB1112	cat2(e1112)	VEH	17.062	8.927	4.94795	2.9761	-1.97185	0	0.29777	0.886193	-0.587157
00000040_6.tif	control	CB1112	cat2(e1112)	VEH	18.51	11.719	4.94795	3.56895	-1.37899	0	0.29777	1.06273	-0.410623
00000040_6.tif	control	CB1112	cat2(e1112)	VEH	18.495	11.797	4.94795	3.5692	-1.37874	0	0.29777	1.0628	-0.410549
00000040_6.tif	control	CB1112	cat2(e1112)	VEH	18.812	12.073	4.94795	3.94098	-1.00696	0	0.29777	1.17351	-0.299843
00000040_6.tif	control	CB1112	cat2(e1112)	VEH	18.719	12.24	4.94795	3.8978	-1.05015	0	0.29777	1.16065	-0.312702
00000040_6.tif	control	CB1112	cat2(e1112)	VEH	17.349	12.745	4.94795	2.88329	-2.06465	0	0.29777	0.858558	-0.614791
00000040_6.tif	control	CB1112	cat2(e1112)	VEH	17.214	12.844	4.94795	2.83518	-2.11277	0	0.29777	0.844231	-0.629119
0000043_12.tif	control	CB1112	cat2(e1112)	DA	9.208	18.552	5.10415	7.63036	2.52621	1	0.29777	2.27209	0.752229
0000043_12.tif	control	CB1112	cat2(e1112)	DA	9.599	14.457	5.10415	4.49074	-0.613412	0	0.29777	1.33721	-0.182656
0000043_12.tif	control	CB1112	cat2(e1112)	DA	12.634	12.845	5.10415	1.05896	-4.04519	0	0.29777	0.315327	-1.20454
0000043_12.tif	control	CB1112	cat2(e1112)	DA	12.571	12.7	5.10415	1.04126	-4.06289	0	0.29777	0.310056	-1.20981
0000043_12.tif	control	CB1112	cat2(e1112)	DA	11.967	11.72	5.10415	1.63149	-3.47267	0	0.29777	0.485808	-1.03406
0000043_12.tif	control	CB1112	cat2(e1112)	DA	12.259	11.915	5.10415	1.29508	-3.80908	0	0.29777	0.385635	-1.13423
0000043_12.tif	control	CB1112	cat2(e1112)	DA	12.55	11.519	5.10415	1.20663	-3.89752	0	0.29777	0.359299	-1.16057
0000043_12.tif	control	CB1112	cat2(e1112)	DA	12.773	10.304	5.10415	2.08089	-3.02327	0	0.29777	0.619625	-0.900239
0000043_12.tif	control	CB1112	cat2(e1112)	DA	12.786	8.411	5.10415	3.90667	-1.19748	0	0.29777	1.16329	-0.356574
0000043_12.tif	control	CB1112	cat2(e1112)	DA	12.766	8.349	5.10415	3.97131	-1.13284	0	0.29777	1.18254	-0.337326
0000043_12.tif	control	CB1112	cat2(e1112)	DA	11.286	8.161	5.10415	4.65469	-0.449469	0	0.29777	1.38603	-0.133838
0000043_12.tif	control	CB1112	cat2(e1112)	DA	12.988	7.286	5.10415	4.99137	-0.112784	0	0.29777	1.48628	-0.0335836
0000043_12.tif	control	CB1112	cat2(e1112)	DA	13.682	7.214	5.10415	5.03894	-0.0652179	0	0.29777	1.50044	-0.0194199
0000043_12.tif	control	CB1112	cat2(e1112)	DA	14.113	7.227	5.10415	5.05906	-0.0450894	0	0.29777	1.50644	-0.0134263
0000043_12.tif	control	CB1112	cat2(e1112)	DA	14.655	7.477	5.10415	4.90842	-0.195738	0	0.29777	1.46158	-0.0582848
0000043_12.tif	control	CB1112	cat2(e1112)	DA	15.516	7.616	5.10415	5.04955	-0.0546006	0	0.29777	1.50361	-0.0162584
0000043_12.tif	control	CB1112	cat2(e1112)	DA	15.349	8.769	5.10415	3.93691	-1.16724	0	0.29777	1.17229	-0.34757
0000043_12.tif	control	CB1112	cat2(e1112)	DA	13.349	11.332	5.10415	0.932011	-4.17214	0	0.29777	0.277525	-1.24234
0000043_12.tif	control	CB1112	cat2(e1112)	DA	15.141	13.623	5.10415	2.13197	-2.97219	0	0.29777	0.634836	-0.885028
0000043_12.tif	control	CB1112	cat2(e1112)	DA	15.189	13.72	5.10415	2.23158	-2.87258	0	0.29777	0.664497	-0.855367
0000043_12.tif	control	CB1112	cat2(e1112)	DA	13.849	16.335	5.10415	4.09904	-1.00511	0	0.29777	1.22057	-0.299292
0000043_12.tif	control	CB1112	cat2(e1112)	DA	13.939	16.245	5.10415	4.01797	-1.08619	0	0.29777	1.19643	-0.323434
0000043_12.tif	control	CB1112	cat2(e1112)	DA	14.405	16.606	5.10415	4.44699	-0.65716	0	0.29777	1.32418	-0.195682
0000043_12.tif	control	CB1112	cat2(e1112)	DA	16.03	15.863	5.10415	4.40502	-0.699138	0	0.29777	1.31168	-0.208182
0000043_12.tif	control	CB1112	cat2(e1112)	DA	17.752	10.908	5.10415	4.44922	-0.654938	0	0.29777	1.32484	-0.195021
0000043_12.tif	control	CB1112	cat2(e1112)	DA	16.509	10.7	5.10415	3.37587	-1.72828	0	0.29777	1.00523	-0.514631
0000043_12.tif	control	CB1112	cat2(e1112)	DA	16.495	10.297	5.10415	3.56713	-1.53702	0	0.29777	1.06219	-0.457679
0000043_12.tif	control	CB1112	cat2(e1112)	DA	16.543	9.957	5.10415	3.80223	-1.30193	0	0.29777	1.13219	-0.387675
0000043_12.tif	control	CB1112	cat2(e1112)	DA	15.932	7.554	5.10415	5.2838	0.179642	1	0.29777	1.57336	0.0534919
0000043_12.tif	control	CB1112	cat2(e1112)	DA	19.814	5.519	5.10415	9.22208	4.11793	1	0.29777	2.74606	1.2262
0000043_12.tif	control	CB1112	cat2(e1112)	DA	19.502	4.227	5.10415	10.0136	4.90947	1	0.29777	2.98176	1.46189
0000043_12.tif	control	CB1112	cat2(e1112)	DA	21.141	13.37	5.10415	7.71275	2.6086	1	0.29777	2.29663	0.776762
0000044_18.tif	predator	CB1112	cat2(e1112)	DA	6.677	16.042	4.80205	7.89324	3.0912	1	0.29777	2.35037	0.920465
0000044_18.tif	predator	CB1112	cat2(e1112)	DA	6.561	15.193	4.80205	7.46778	2.66574	1	0.29777	2.22368	0.793777
0000044_18.tif	predator	CB1112	cat2(e1112)	DA	6.512	14.755	4.80205	7.26884	2.4668	1	0.29777	2.16444	0.734538
0000044_18.tif	predator	CB1112	cat2(e1112)	DA	6.686	14.227	4.80205	6.85286	2.05081	1	0.29777	2.04058	0.61067
0000044_18.tif	predator	CB1112	cat2(e1112)	DA	7.998	15.38	4.80205	6.46694	1.6649	1	0.29777	1.92566	0.495757
0000044_18.tif	predator	CB1112	cat2(e1112)	DA	8.415	16.095	4.80205	6.70364	1.90159	1	0.29777	1.99614	0.566237
0000044_18.tif	predator	CB1112	cat2(e1112)	DA	8.637	16.095	4.80205	6.56402	1.76198	1	0.29777	1.95457	0.524663
0000044_18.tif	predator	CB1112	cat2(e1112)	DA	6.519	11.665	4.80205	6.22162	1.41958	1	0.29777	1.85261	0.422707
0000044_18.tif	predator	CB1112	cat2(e1112)	DA	6.394	10.97	4.80205	6.30408	1.50204	1	0.29777	1.87717	0.447261
0000044_18.tif	predator	CB1112	cat2(e1112)	DA	6.526	10.804	4.80205	6.17345	1.37141	1	0.29777	1.83827	0.408364
0000044_18.tif	predator	CB1112	cat2(e1112)	DA	2.88	10.665	4.80205	9.82179	5.01975	1	0.29777	2.92464	1.49473
0000044_18.tif	predator	CB1112	cat2(e1112)	DA	2.943	10.547	4.80205	9.76283	4.96079	1	0.29777	2.90708	1.47717
0000044_18.tif	predator	CB1112	cat2(e1112)	DA	6.443	9.012	4.80205	6.54481	1.74276	1	0.29777	1.94885	0.518942
0000044_18.tif	predator	CB1112	cat2(e1112)	DA	6.269	8.957	4.80205	6.72729	1.92524	1	0.29777	2.00318	0.573279
0000044_18.tif	predator	CB1112	cat2(e1112)	DA	11.807	19.22	4.80205	8.32979	3.52774	1	0.29777	2.48036	1.05046
0000044_18.tif	predator	CB1112	cat2(e1112)	DA	11.918	19.193	4.80205	8.29177	3.48972	1	0.29777	2.46904	1.03913
0000044_18.tif	predator	CB1112	cat2(e1112)	DA	14.825	12.828	4.80205	2.84539	-1.95666	0	0.29777	0.847271	-0.582634
0000044_18.tif	predator	CB1112	cat2(e1112)	DA	14.915	12.759	4.80205	2.86899	-1.93305	0	0.29777	0.854301	-0.575605
0000044_18.tif	predator	CB1112	cat2(e1112)	DA	16.005	11.939	4.80205	3.45518	-1.34687	0	0.29777	1.02885	-0.401057
0000044_18.tif	predator	CB1112	cat2(e1112)	DA	16.401	12.057	4.80205	3.86838	-0.933665	0	0.29777	1.15189	-0.278017
0000044_18.tif	predator	CB1112	cat2(e1112)	DA	16.769	12.064	4.80205	4.22385	-0.578195	0	0.29777	1.25774	-0.172169
0000044_18.tif	predator	CB1112	cat2(e1112)	DA	17.234	10.939	4.80205	4.536	-0.266045	0	0.29777	1.35068	-0.0792203
0000044_18.tif	predator	CB1112	cat2(e1112)	DA	16.026	4.286	4.80205	7.43806	2.63601	1	0.29777	2.21483	0.784925
0000044_18.tif	predator	CB1112	cat2(e1112)	DA	16.172	4.224	4.80205	7.55953	2.75748	1	0.29777	2.251	0.821096
0000044_18.tif	predator	CB1112	cat2(e1112)	DA	20.061	5.498	4.80205	9.15464	4.35259	1	0.29777	2.72598	1.29607
0000044_18.tif	predator	CB1112	cat2(e1112)	DA	20.137	5.394	4.80205	9.27764	4.4756	1	0.29777	2.7626	1.3327
0000044_18.tif	predator	CB1112	cat2(e1112)	DA	20.727	6.116	4.80205	9.36571	4.56366	1	0.29777	2.78883	1.35892
0000044_18.tif	predator	CB1112	cat2(e1112)	DA	20.804	6.248	4.80205	9.36501	4.56296	1	0.29777	2.78862	1.35871
0000044_18.tif	predator	CB1112	cat2(e1112)	DA	20.345	9.349	4.80205	7.81035	3.0083	1	0.29777	2.32569	0.895782
0000044_18.tif	predator	CB1112	cat2(e1112)	DA	20.352	9.613	4.80205	7.76784	2.96579	1	0.29777	2.31303	0.883125
0000044_18.tif	predator	CB1112	cat2(e1112)	DA	18.241	9.655	4.80205	5.68955	0.887501	1	0.29777	1.69418	0.264271
0000044_18.tif	predator	CB1112	cat2(e1112)	DA	21.644	14.293	4.80205	9.55442	4.75237	1	0.29777	2.84502	1.41511
0000044_18.tif	predator	CB1112	cat2(e1112)	DA	21.776	14.335	4.80205	9.69276	4.89072	1	0.29777	2.88621	1.45631
0000044_22.tif	predator	CB1112	cat2(e1112)	VEH	7.323	19.729	5.0937	9.52469	4.43099	1	0.29777	2.83617	1.31942
0000044_22.tif	predator	CB1112	cat2(e1112)	VEH	7.283	19.592	5.0937	9.42287	4.32917	1	0.29777	2.80585	1.2891
0000044_22.tif	predator	CB1112	cat2(e1112)	VEH	4.964	17.641	5.0937	9.30203	4.20833	1	0.29777	2.76986	1.25311
0000044_22.tif	predator	CB1112	cat2(e1112)	VEH	4.286	13.161	5.0937	7.7197	2.62601	1	0.29777	2.2987	0.781946
0000044_22.tif	predator	CB1112	cat2(e1112)	VEH	11.391	14.026	5.0937	2.74188	-2.35182	0	0.29777	0.816449	-0.700301
0000044_22.tif	predator	CB1112	cat2(e1112)	VEH	9.896	13.438	5.0937	2.84132	-2.25238	0	0.29777	0.84606	-0.67069
0000044_22.tif	predator	CB1112	cat2(e1112)	VEH	9.745	13.214	5.0937	2.7862	-2.3075	0	0.29777	0.829646	-0.687104
0000044_22.tif	predator	CB1112	cat2(e1112)	VEH	11.25	12.818	5.0937	1.59687	-3.49683	0	0.29777	0.4755	-1.04125
0000044_22.tif	predator	CB1112	cat2(e1112)	VEH	11.911	12.245	5.0937	0.942013	-4.15168	0	0.29777	0.280503	-1.23625
0000044_22.tif	predator	CB1112	cat2(e1112)	VEH	12.146	12.26	5.0937	1.01584	-4.07786	0	0.29777	0.302486	-1.21426
0000044_22.tif	predator	CB1112	cat2(e1112)	VEH	11.25	11.995	5.0937	0.86513	-4.22857	0	0.29777	0.25761	-1.25914
0000044_22.tif	predator	CB1112	cat2(e1112)	VEH	12.667	11.958	5.0937	1.0965	-3.9972	0	0.29777	0.326505	-1.19025
0000044_22.tif	predator	CB1112	cat2(e1112)	VEH	12.76	11.693	5.0937	1.05052	-4.04317	0	0.29777	0.312815	-1.20394
0000044_22.tif	predator	CB1112	cat2(e1112)	VEH	11.688	10.984	5.0937	0.34093	-4.75277	0	0.29777	0.101519	-1.41523
0000044_22.tif	predator	CB1112	cat2(e1112)	VEH	11.875	10.526	5.0937	0.791601	-4.3021	0	0.29777	0.235715	-1.28104
0000044_22.tif	predator	CB1112	cat2(e1112)	VEH	11.797	10.474	5.0937	0.838153	-4.25555	0	0.29777	0.249577	-1.26717
0000044_22.tif	predator	CB1112	cat2(e1112)	VEH	11.281	10.521	5.0937	0.935778	-4.15792	0	0.29777	0.278647	-1.2381
0000044_22.tif	predator	CB1112	cat2(e1112)	VEH	11.286	10.438	5.0937	1.00444	-4.08926	0	0.29777	0.299092	-1.21766
0000044_22.tif	predator	CB1112	cat2(e1112)	VEH	10.448	10.839	5.0937	1.41443	-3.67927	0	0.29777	0.421175	-1.09557
0000044_22.tif	predator	CB1112	cat2(e1112)	VEH	9.641	10.615	5.0937	2.25065	-2.84305	0	0.29777	0.670175	-0.846575
0000044_22.tif	predator	CB1112	cat2(e1112)	VEH	10.974	9.62	5.0937	1.8746	-3.2191	0	0.29777	0.558199	-0.958552
0000044_22.tif	predator	CB1112	cat2(e1112)	VEH	10.839	9.495	5.0937	2.04667	-3.04703	0	0.29777	0.609437	-0.907314
0000044_22.tif	predator	CB1112	cat2(e1112)	VEH	10.573	9.094	5.0937	2.52563	-2.56807	0	0.29777	0.752056	-0.764695
0000044_22.tif	predator	CB1112	cat2(e1112)	VEH	10.896	8.573	5.0937	2.87843	-2.21527	0	0.29777	0.857109	-0.659641
0000044_22.tif	predator	CB1112	cat2(e1112)	VEH	11.45	8.95	5.0937	2.38508	-2.70862	0	0.29777	0.710205	-0.806545
0000044_22.tif	predator	CB1112	cat2(e1112)	VEH	13.45	11.908	5.0937	1.77222	-3.32147	0	0.29777	0.527715	-0.989035
0000044_22.tif	predator	CB1112	cat2(e1112)	VEH	13.509	12.814	5.0937	2.28954	-2.80416	0	0.29777	0.681756	-0.834994
0000044_22.tif	predator	CB1112	cat2(e1112)	VEH	14.745	17.339	5.0937	6.7164	1.6227	1	0.29777	1.99994	0.483192
0000044_22.tif	predator	CB1112	cat2(e1112)	VEH	15.698	15.865	5.0937	6.00606	0.912357	1	0.29777	1.78842	0.271673
0000044_22.tif	predator	CB1112	cat2(e1112)	VEH	15.755	15.812	5.0937	6.00356	0.909857	1	0.29777	1.78768	0.270928
0000044_22.tif	predator	CB1112	cat2(e1112)	VEH	14.76	13.203	5.0937	3.5285	-1.5652	0	0.29777	1.05068	-0.466069
0000044_22.tif	predator	CB1112	cat2(e1112)	VEH	16.182	12.802	5.0937	4.64639	-0.447312	0	0.29777	1.38355	-0.133196
0000044_22.tif	predator	CB1112	cat2(e1112)	VEH	16.016	12.776	5.0937	4.48091	-0.612792	0	0.29777	1.33428	-0.182471
0000044_22.tif	predator	CB1112	cat2(e1112)	VEH	15.302	12.453	5.0937	3.70126	-1.39244	0	0.29777	1.10212	-0.414626
0000044_22.tif	predator	CB1112	cat2(e1112)	VEH	14.698	11.729	5.0937	2.94666	-2.14704	0	0.29777	0.877426	-0.639325
0000044_22.tif	predator	CB1112	cat2(e1112)	VEH	14.604	11.599	5.0937	2.83755	-2.25615	0	0.29777	0.844938	-0.671813
0000044_22.tif	predator	CB1112	cat2(e1112)	VEH	17.238	5.672	5.0937	7.84783	2.75413	1	0.29777	2.33685	0.820098
0000044_22.tif	predator	CB1112	cat2(e1112)	VEH	17.321	12.22	5.0937	5.61392	0.520219	1	0.29777	1.67166	0.154906
0000044_22.tif	predator	CB1112	cat2(e1112)	VEH	17.293	12.352	5.0937	5.60926	0.515557	1	0.29777	1.67027	0.153518
0000045_28.tif	control	N2	wt	DA	9.12	10.12	4.91678	4.12866	-0.788116	0	0.29777	1.22939	-0.234677
0000045_28.tif	control	N2	wt	DA	9.073	10.188	4.91678	4.16633	-0.750443	0	0.29777	1.24061	-0.223459
0000045_28.tif	control	N2	wt	DA	9.026	10.234	4.91678	4.20766	-0.709113	0	0.29777	1.25292	-0.211153
0000045_28.tif	control	N2	wt	DA	10.557	10.729	4.91678	2.65118	-2.26559	0	0.29777	0.789442	-0.674626
0000045_28.tif	control	N2	wt	DA	11.083	11.229	4.91678	2.19034	-2.72644	0	0.29777	0.652217	-0.811851
0000045_28.tif	control	N2	wt	DA	11.729	13.969	4.91678	3.58983	-1.32695	0	0.29777	1.06894	-0.395124
0000045_28.tif	control	N2	wt	DA	11.417	13.573	4.91678	3.38723	-1.52955	0	0.29777	1.00861	-0.455454
0000045_28.tif	control	N2	wt	DA	12.948	15.214	4.91678	4.52348	-0.393297	0	0.29777	1.34696	-0.117112
0000045_28.tif	control	N2	wt	DA	12.865	15.156	4.91678	4.47118	-0.4456	0	0.29777	1.33138	-0.132686
0000045_28.tif	control	N2	wt	DA	14.255	14.578	4.91678	4.01878	-0.897993	0	0.29777	1.19667	-0.267396
0000045_28.tif	control	N2	wt	DA	14.312	14.516	4.91678	3.97441	-0.942365	0	0.29777	1.18346	-0.280608
0000045_28.tif	control	N2	wt	DA	14.385	13.943	4.91678	3.45186	-1.46491	0	0.29777	1.02786	-0.436207
0000045_28.tif	control	N2	wt	DA	15.078	14.401	4.91678	4.14839	-0.768389	0	0.29777	1.23526	-0.228803
0000045_28.tif	control	N2	wt	DA	14.99	14.318	4.91678	4.03484	-0.881937	0	0.29777	1.20145	-0.262614
0000045_28.tif	control	N2	wt	DA	15.771	13.75	4.91678	3.98543	-0.931343	0	0.29777	1.18674	-0.277326
0000045_28.tif	control	N2	wt	DA	15.635	13.734	4.91678	3.88685	-1.02992	0	0.29777	1.15739	-0.30668
0000045_28.tif	control	N2	wt	DA	15.682	13.682	4.91678	3.8762	-1.04057	0	0.29777	1.15422	-0.309852
0000045_28.tif	control	N2	wt	DA	13.922	13.12	4.91678	2.52505	-2.39172	0	0.29777	0.751884	-0.712184
0000045_28.tif	control	N2	wt	DA	15.917	12.26	4.91678	3.12706	-1.78971	0	0.29777	0.931146	-0.532923
0000045_28.tif	control	N2	wt	DA	15.865	12.151	4.91678	3.02834	-1.88843	0	0.29777	0.90175	-0.562319
0000045_28.tif	control	N2	wt	DA	13.531	12.323	4.91678	1.65679	-3.25999	0	0.29777	0.493342	-0.970726
0000045_28.tif	control	N2	wt	DA	13.375	11.76	4.91678	1.07505	-3.84173	0	0.29777	0.320118	-1.14395
0000045_28.tif	control	N2	wt	DA	13.344	11.536	4.91678	0.848964	-4.06781	0	0.29777	0.252796	-1.21127
0000045_28.tif	control	N2	wt	DA	15.099	10.302	4.91678	1.93202	-2.98476	0	0.29777	0.575297	-0.888771
0000045_28.tif	control	N2	wt	DA	15.219	10.13	4.91678	2.08968	-2.8271	0	0.29777	0.622243	-0.841825
0000045_28.tif	control	N2	wt	DA	13.12	8.37	4.91678	2.32966	-2.58711	0	0.29777	0.693704	-0.770365
0000045_28.tif	control	N2	wt	DA	13.182	8.167	4.91678	2.53113	-2.38564	0	0.29777	0.753696	-0.710373
0000045_28.tif	control	N2	wt	DA	17.047	8.49	4.91678	4.42868	-0.488098	0	0.29777	1.31873	-0.145341
0000045_28.tif	control	N2	wt	DA	17.104	8.406	4.91678	4.52019	-0.39659	0	0.29777	1.34598	-0.118092
0000045_28.tif	control	N2	wt	DA	16.38	9.354	4.91678	3.44498	-1.47179	0	0.29777	1.02581	-0.438255
0000045_28.tif	control	N2	wt	DA	16.542	9.943	4.91678	3.41842	-1.49836	0	0.29777	1.0179	-0.446166
0000045_28.tif	control	N2	wt	DA	16.599	17.156	4.91678	7.29415	2.37738	1	0.29777	2.17198	0.707911
0000045_28.tif	control	N2	wt	DA	17.073	17.401	4.91678	7.73747	2.82069	1	0.29777	2.30399	0.839918
0000002_38.tif	predator	N2	wt	DA	7.229	5.396	5.07303	8.57911	3.50608	1	0.29777	2.5546	1.04401
0000002_38.tif	predator	N2	wt	DA	5.724	12.672	5.07303	8.1411	3.06807	1	0.29777	2.42418	0.913579
0000002_38.tif	predator	N2	wt	DA	6.016	13.63	5.07303	8.10974	3.03671	1	0.29777	2.41484	0.904241
0000002_38.tif	predator	N2	wt	DA	6.03	14.095	5.07303	8.2575	3.18447	1	0.29777	2.45884	0.948239
0000002_38.tif	predator	N2	wt	DA	6.342	15.415	5.07303	8.5633	3.49027	1	0.29777	2.5499	1.0393
0000002_38.tif	predator	N2	wt	DA	6.543	15.262	5.07303	8.31236	3.23933	1	0.29777	2.47517	0.964575
0000002_38.tif	predator	N2	wt	DA	8.342	17.818	5.07303	8.64581	3.57278	1	0.29777	2.57446	1.06387
0000002_38.tif	predator	N2	wt	DA	8.224	18.026	5.07303	8.88227	3.80924	1	0.29777	2.64487	1.13428
0000002_38.tif	predator	N2	wt	DA	8.405	18.13	5.07303	8.85504	3.782	1	0.29777	2.63676	1.12617
0000002_38.tif	predator	N2	wt	DA	8.988	18.137	5.07303	8.52522	3.45218	1	0.29777	2.53855	1.02796
0000002_38.tif	predator	N2	wt	DA	9.849	19.575	5.07303	9.37095	4.29792	1	0.29777	2.79039	1.27979
0000002_38.tif	predator	N2	wt	DA	9.738	19.741	5.07303	9.56795	4.49492	1	0.29777	2.84905	1.33845
0000002_38.tif	predator	N2	wt	DA	12.45	20.783	5.07303	9.83153	4.7585	1	0.29777	2.92754	1.41694
0000002_38.tif	predator	N2	wt	DA	11.359	19.72	5.07303	8.99831	3.92528	1	0.29777	2.67943	1.16883
0000002_38.tif	predator	N2	wt	DA	13.068	19.255	5.07303	8.2481	3.17506	1	0.29777	2.45604	0.945438
0000002_38.tif	predator	N2	wt	DA	13.033	19.137	5.07303	8.13323	3.0602	1	0.29777	2.42183	0.911235
0000002_38.tif	predator	N2	wt	DA	15.297	11.37	5.07303	1.63454	-3.43849	0	0.29777	0.486717	-1.02388
0000002_38.tif	predator	N2	wt	DA	13.852	10.675	5.07303	0.387881	-4.68515	0	0.29777	0.115499	-1.3951
0000002_38.tif	predator	N2	wt	DA	13.734	10.689	5.07303	0.34389	-4.72914	0	0.29777	0.1024	-1.4082
0000002_38.tif	predator	N2	wt	DA	13.089	10.745	5.07303	0.672813	-4.40022	0	0.29777	0.200343	-1.31025
0000002_38.tif	predator	N2	wt	DA	12.026	10.599	5.07303	1.72691	-3.34613	0	0.29777	0.514221	-0.996376
0000002_38.tif	predator	N2	wt	DA	11.79	9.891	5.07303	2.22263	-2.85041	0	0.29777	0.661831	-0.848766
0000002_38.tif	predator	N2	wt	DA	12.005	1.821	5.07303	9.36431	4.29128	1	0.29777	2.78841	1.27781
0000002_38.tif	predator	N2	wt	DA	18.964	3.755	5.07303	8.9817	3.90867	1	0.29777	2.67448	1.16388
0000002_38.tif	predator	N2	wt	DA	19.012	3.818	5.07303	8.95913	3.88609	1	0.29777	2.66776	1.15716
0000002_38.tif	predator	N2	wt	DA	17.616	5.825	5.07303	6.51561	1.44258	1	0.29777	1.94015	0.429556
0000002_38.tif	predator	N2	wt	DA	16.866	8.349	5.07303	4.15082	-0.922209	0	0.29777	1.23599	-0.274606
0000002_38.tif	predator	N2	wt	DA	16.929	8.502	5.07303	4.10307	-0.969962	0	0.29777	1.22177	-0.288825
0000002_38.tif	predator	N2	wt	DA	15.686	18.148	5.07303	7.38944	2.31641	1	0.29777	2.20035	0.689756
0000002_38.tif	predator	N2	wt	DA	18.526	17.106	5.07303	7.75985	2.68681	1	0.29777	2.31065	0.800052
0000002_38.tif	predator	N2	wt	DA	18.651	17.057	5.07303	7.80031	2.72728	1	0.29777	2.3227	0.812102
0000002_38.tif	predator	N2	wt	DA	21.606	11.293	5.07303	7.91234	2.83931	1	0.29777	2.35606	0.84546
00000003_8.tif	control	CB1112	cat2(e1112)	DA	7.406	6.885	5.18238	9.20391	4.02153	1	0.29777	2.74065	1.19749
00000003_8.tif	control	CB1112	cat2(e1112)	DA	7.552	6.906	5.18238	9.07123	3.88884	1	0.29777	2.70114	1.15798
00000003_8.tif	control	CB1112	cat2(e1112)	DA	9.073	7.745	5.18238	7.34371	2.16133	1	0.29777	2.18674	0.64358
00000003_8.tif	control	CB1112	cat2(e1112)	DA	8.896	7.745	5.18238	7.48841	2.30603	1	0.29777	2.22982	0.686665
00000003_8.tif	control	CB1112	cat2(e1112)	DA	8.781	14.396	5.18238	6.70277	1.52039	1	0.29777	1.99588	0.452727
00000003_8.tif	control	CB1112	cat2(e1112)	DA	12.458	12.542	5.18238	2.64189	-2.54049	0	0.29777	0.786676	-0.756481
00000003_8.tif	control	CB1112	cat2(e1112)	DA	12.365	12.542	5.18238	2.73309	-2.44929	0	0.29777	0.813833	-0.729325
00000003_8.tif	control	CB1112	cat2(e1112)	DA	10.01	8.797	5.18238	5.97774	0.795355	1	0.29777	1.77999	0.236833
00000003_8.tif	control	CB1112	cat2(e1112)	DA	9.896	8.661	5.18238	6.14726	0.96488	1	0.29777	1.83047	0.287312
00000003_8.tif	control	CB1112	cat2(e1112)	DA	15.323	12.922	5.18238	0.947107	-4.23527	0	0.29777	0.28202	-1.26114
00000003_8.tif	control	CB1112	cat2(e1112)	DA	16.594	11.802	5.18238	1.56173	-3.62065	0	0.29777	0.465037	-1.07812
00000003_8.tif	control	CB1112	cat2(e1112)	DA	16.484	11.802	5.18238	1.45285	-3.72953	0	0.29777	0.432614	-1.11054
00000003_8.tif	control	CB1112	cat2(e1112)	DA	14.599	13.479	5.18238	1.53006	-3.65232	0	0.29777	0.455605	-1.08755
00000003_8.tif	control	CB1112	cat2(e1112)	DA	15.984	14.37	5.18238	2.53363	-2.64875	0	0.29777	0.754439	-0.788719
00000003_8.tif	control	CB1112	cat2(e1112)	DA	16.484	14.714	5.18238	3.05682	-2.12556	0	0.29777	0.91023	-0.632927
00000003_8.tif	control	CB1112	cat2(e1112)	DA	17.891	17.469	5.18238	6.15008	0.967703	1	0.29777	1.83131	0.288153
00000003_8.tif	control	CB1112	cat2(e1112)	DA	17.021	17.474	5.18238	5.804	0.621621	1	0.29777	1.72826	0.1851
00000003_8.tif	control	CB1112	cat2(e1112)	DA	17.661	16.214	5.18238	4.94532	-0.237061	0	0.29777	1.47257	-0.0705895
00000003_8.tif	control	CB1112	cat2(e1112)	DA	17.573	16.214	5.18238	4.89938	-0.283006	0	0.29777	1.45889	-0.0842707
00000003_8.tif	control	CB1112	cat2(e1112)	DA	17.073	12.854	5.18238	2.19247	-2.98991	0	0.29777	0.652851	-0.890306
00000003_8.tif	control	CB1112	cat2(e1112)	DA	17.849	10.87	5.18238	3.0273	-2.15509	0	0.29777	0.901438	-0.64172
00000003_8.tif	control	CB1112	cat2(e1112)	DA	17.802	10.786	5.18238	3.01711	-2.16528	0	0.29777	0.898403	-0.644754
00000003_8.tif	control	CB1112	cat2(e1112)	DA	19.005	10.859	5.18238	4.12364	-1.05874	0	0.29777	1.2279	-0.315261
00000003_8.tif	control	CB1112	cat2(e1112)	DA	18.969	10.172	5.18238	4.33387	-0.848513	0	0.29777	1.2905	-0.252662
00000003_8.tif	control	CB1112	cat2(e1112)	DA	17.667	10.302	5.18238	3.13085	-2.05154	0	0.29777	0.932272	-0.610886
00000003_8.tif	control	CB1112	cat2(e1112)	DA	18.927	8.984	5.18238	4.92417	-0.258214	0	0.29777	1.46627	-0.0768884
00000003_8.tif	control	CB1112	cat2(e1112)	DA	18.922	8.323	5.18238	5.35293	0.17055	1	0.29777	1.59394	0.0507846
00000003_8.tif	control	CB1112	cat2(e1112)	DA	21.682	11.55	5.18238	6.65134	1.46896	1	0.29777	1.98057	0.437413
0000005_10.tif	control	CB1112	cat2(e1112)	VEH	8.26	9.589	4.82288	5.96127	1.13839	1	0.29777	1.77509	0.338977
0000005_10.tif	control	CB1112	cat2(e1112)	VEH	8.328	9.786	4.82288	5.81665	0.993769	1	0.29777	1.73202	0.295915
0000005_10.tif	control	CB1112	cat2(e1112)	VEH	8.469	9.724	4.82288	5.71453	0.891645	1	0.29777	1.70161	0.265505
0000005_10.tif	control	CB1112	cat2(e1112)	VEH	8.573	9.693	4.82288	5.63423	0.811347	1	0.29777	1.6777	0.241595
0000005_10.tif	control	CB1112	cat2(e1112)	VEH	11.026	9.688	4.82288	3.59893	-1.22395	0	0.29777	1.07165	-0.364455
0000005_10.tif	control	CB1112	cat2(e1112)	VEH	10.651	9.594	4.82288	3.94012	-0.882756	0	0.29777	1.17325	-0.262858
0000005_10.tif	control	CB1112	cat2(e1112)	VEH	10.776	9.448	4.82288	3.94548	-0.877397	0	0.29777	1.17485	-0.261262
0000005_10.tif	control	CB1112	cat2(e1112)	VEH	11.208	8.688	4.82288	4.24191	-0.580974	0	0.29777	1.26311	-0.172997
0000005_10.tif	control	CB1112	cat2(e1112)	VEH	10.714	8.391	4.82288	4.77393	-0.0489496	0	0.29777	1.42153	-0.0145757
0000005_10.tif	control	CB1112	cat2(e1112)	VEH	10.562	10.38	4.82288	3.55481	-1.26807	0	0.29777	1.05852	-0.377592
0000005_10.tif	control	CB1112	cat2(e1112)	VEH	10.078	10.839	4.82288	3.79682	-1.02606	0	0.29777	1.13058	-0.30553
0000005_10.tif	control	CB1112	cat2(e1112)	VEH	10.021	10.755	4.82288	3.88004	-0.942837	0	0.29777	1.15536	-0.280748
0000005_10.tif	control	CB1112	cat2(e1112)	VEH	11.99	14.505	4.82288	2.85872	-1.96416	0	0.29777	0.85124	-0.584869
0000005_10.tif	control	CB1112	cat2(e1112)	VEH	13.38	14.406	4.82288	2.25347	-2.56941	0	0.29777	0.671017	-0.765092
0000005_10.tif	control	CB1112	cat2(e1112)	VEH	11.875	12.135	4.82288	1.76029	-3.06259	0	0.29777	0.524162	-0.911947
0000005_10.tif	control	CB1112	cat2(e1112)	VEH	12.016	12.104	4.82288	1.62023	-3.20266	0	0.29777	0.482454	-0.953655
0000005_10.tif	control	CB1112	cat2(e1112)	VEH	12.729	12.672	4.82288	1.03724	-3.78564	0	0.29777	0.308858	-1.12725
0000005_10.tif	control	CB1112	cat2(e1112)	VEH	13.208	12.536	4.82288	0.564349	-4.25853	0	0.29777	0.168046	-1.26806
0000005_10.tif	control	CB1112	cat2(e1112)	VEH	13.26	12.531	4.82288	0.52261	-4.30027	0	0.29777	0.155618	-1.28049
0000005_10.tif	control	CB1112	cat2(e1112)	VEH	14.807	11.802	4.82288	1.22752	-3.59536	0	0.29777	0.365519	-1.07059
0000005_10.tif	control	CB1112	cat2(e1112)	VEH	14.391	11.141	4.82288	1.27445	-3.54843	0	0.29777	0.379492	-1.05662
0000005_10.tif	control	CB1112	cat2(e1112)	VEH	13.682	11.339	4.82288	0.829333	-3.99355	0	0.29777	0.24695	-1.18916
0000005_10.tif	control	CB1112	cat2(e1112)	VEH	13.802	10.328	4.82288	1.84657	-2.97631	0	0.29777	0.549852	-0.886257
0000005_10.tif	control	CB1112	cat2(e1112)	VEH	13.719	10.349	4.82288	1.81994	-3.00294	0	0.29777	0.541923	-0.894186
0000005_10.tif	control	CB1112	cat2(e1112)	VEH	14.109	9.802	4.82288	2.41203	-2.41085	0	0.29777	0.718231	-0.717878
0000005_10.tif	control	CB1112	cat2(e1112)	VEH	14.953	9.932	4.82288	2.59468	-2.2282	0	0.29777	0.772617	-0.663492
0000005_10.tif	control	CB1112	cat2(e1112)	VEH	14.844	9.901	4.82288	2.56835	-2.25453	0	0.29777	0.764778	-0.671331
0000005_10.tif	control	CB1112	cat2(e1112)	VEH	14.724	9.698	4.82288	2.6985	-2.12438	0	0.29777	0.803531	-0.632578
0000005_10.tif	control	CB1112	cat2(e1112)	VEH	14.505	8.448	4.82288	3.81941	-1.00347	0	0.29777	1.1373	-0.298805
0000005_10.tif	control	CB1112	cat2(e1112)	VEH	15.906	8.5	4.82288	4.31327	-0.509607	0	0.29777	1.28436	-0.151746
0000005_10.tif	control	CB1112	cat2(e1112)	VEH	15.844	8.88	4.82288	3.96031	-0.862571	0	0.29777	1.17926	-0.256848
0000005_10.tif	control	CB1112	cat2(e1112)	VEH	17.068	10.255	4.82288	3.92953	-0.893347	0	0.29777	1.1701	-0.266012
0000005_10.tif	control	CB1112	cat2(e1112)	VEH	17.161	10.307	4.82288	3.98651	-0.836369	0	0.29777	1.18706	-0.249046
0000005_10.tif	control	CB1112	cat2(e1112)	VEH	16.875	12.828	4.82288	3.30674	-1.51614	0	0.29777	0.984648	-0.451462
0000005_10.tif	control	CB1112	cat2(e1112)	VEH	16.833	12.906	4.82288	3.28227	-1.54061	0	0.29777	0.977363	-0.458746
0000005_10.tif	control	CB1112	cat2(e1112)	VEH	15.141	13.844	4.82288	2.25397	-2.56891	0	0.29777	0.671164	-0.764946
0000005_10.tif	control	CB1112	cat2(e1112)	VEH	15.49	14.286	4.82288	2.81624	-2.00664	0	0.29777	0.838591	-0.597518
0000005_10.tif	control	CB1112	cat2(e1112)	VEH	15.594	14.125	4.82288	2.76974	-2.05314	0	0.29777	0.824745	-0.611364
0000005_10.tif	control	CB1112	cat2(e1112)	VEH	15.609	14.745	4.82288	3.24696	-1.57592	0	0.29777	0.966848	-0.469261
0000005_10.tif	control	CB1112	cat2(e1112)	VEH	15.604	14.854	4.82288	3.33121	-1.49168	0	0.29777	0.991933	-0.444176
0000005_10.tif	control	CB1112	cat2(e1112)	VEH	16.62	15.422	4.82288	4.41647	-0.406406	0	0.29777	1.31509	-0.121015
00000006_6.tif	control	CB1112	cat2(e1112)	VEH	12.137	10.509	4.7971	2.14042	-2.65668	0	0.29777	0.637353	-0.79108
00000006_6.tif	control	CB1112	cat2(e1112)	VEH	12.068	10.582	4.7971	2.1997	-2.59741	0	0.29777	0.655004	-0.77343
00000006_6.tif	control	CB1112	cat2(e1112)	VEH	11.432	10.634	4.7971	2.82899	-1.96811	0	0.29777	0.842388	-0.586045
00000006_6.tif	control	CB1112	cat2(e1112)	VEH	13.286	7.297	4.7971	3.6519	-1.1452	0	0.29777	1.08743	-0.341006
00000006_6.tif	control	CB1112	cat2(e1112)	VEH	13.29	7.543	4.7971	3.41421	-1.38289	0	0.29777	1.01665	-0.411784
00000006_6.tif	control	CB1112	cat2(e1112)	VEH	12.564	11.422	4.7971	1.79563	-3.00147	0	0.29777	0.534686	-0.893748
00000006_6.tif	control	CB1112	cat2(e1112)	VEH	12.481	11.085	4.7971	1.79398	-3.00312	0	0.29777	0.534193	-0.89424
00000006_6.tif	control	CB1112	cat2(e1112)	VEH	12.262	13.637	4.7971	3.45236	-1.34474	0	0.29777	1.02801	-0.400424
00000006_6.tif	control	CB1112	cat2(e1112)	VEH	12.342	13.786	4.7971	3.53109	-1.26602	0	0.29777	1.05145	-0.376981
00000006_6.tif	control	CB1112	cat2(e1112)	VEH	11.585	15.012	4.7971	4.97177	0.174669	1	0.29777	1.48045	0.0520113
00000006_6.tif	control	CB1112	cat2(e1112)	VEH	14.97	14.304	4.7971	3.55857	-1.23853	0	0.29777	1.05964	-0.368798
00000006_6.tif	control	CB1112	cat2(e1112)	VEH	14.686	14.068	4.7971	3.27845	-1.51865	0	0.29777	0.976225	-0.452209
00000006_6.tif	control	CB1112	cat2(e1112)	VEH	13.536	13.03	4.7971	2.32592	-2.47118	0	0.29777	0.692589	-0.735845
00000006_6.tif	control	CB1112	cat2(e1112)	VEH	13.484	7.542	4.7971	3.3655	-1.4316	0	0.29777	1.00215	-0.426288
00000006_6.tif	control	CB1112	cat2(e1112)	VEH	16.5	9.068	4.7971	2.84649	-1.95061	0	0.29777	0.8476	-0.580834
00000006_6.tif	control	CB1112	cat2(e1112)	VEH	16.37	7.62	4.7971	3.83411	-0.962991	0	0.29777	1.14168	-0.28675
00000006_6.tif	control	CB1112	cat2(e1112)	VEH	15.526	7.422	4.7971	3.62605	-1.17105	0	0.29777	1.07973	-0.348704
00000006_6.tif	control	CB1112	cat2(e1112)	VEH	15.609	7.385	4.7971	3.69037	-1.10674	0	0.29777	1.09888	-0.329553
00000006_6.tif	control	CB1112	cat2(e1112)	VEH	15.672	7.292	4.7971	3.80007	-0.99703	0	0.29777	1.13155	-0.296886
00000006_6.tif	control	CB1112	cat2(e1112)	VEH	15.734	7.224	4.7971	3.88642	-0.910683	0	0.29777	1.15726	-0.271174
00000006_6.tif	control	CB1112	cat2(e1112)	VEH	15.401	6.12	4.7971	4.83575	0.0386497	1	0.29777	1.43994	0.0115087
00000006_6.tif	control	CB1112	cat2(e1112)	VEH	14.703	6.526	4.7971	4.31532	-0.481787	0	0.29777	1.28497	-0.143462
00000006_6.tif	control	CB1112	cat2(e1112)	VEH	14.583	6.594	4.7971	4.23672	-0.560389	0	0.29777	1.26157	-0.166867
00000006_6.tif	control	CB1112	cat2(e1112)	VEH	16.823	6.88	4.7971	4.70133	-0.0957785	0	0.29777	1.39991	-0.02852
00000006_6.tif	control	CB1112	cat2(e1112)	VEH	18.068	8.911	4.7971	4.26329	-0.533817	0	0.29777	1.26948	-0.158955
00000006_6.tif	control	CB1112	cat2(e1112)	VEH	17.854	8.964	4.7971	4.04847	-0.748634	0	0.29777	1.20551	-0.222921
00000006_6.tif	control	CB1112	cat2(e1112)	VEH	17.74	8.974	4.7971	3.94279	-0.854319	0	0.29777	1.17404	-0.25439
00000006_6.tif	control	CB1112	cat2(e1112)	VEH	17.078	8.51	4.7971	3.64639	-1.15071	0	0.29777	1.08579	-0.342647
00000006_6.tif	control	CB1112	cat2(e1112)	VEH	17.484	10.172	4.7971	3.29299	-1.50412	0	0.29777	0.980552	-0.447881
00000006_6.tif	control	CB1112	cat2(e1112)	VEH	18.833	11.51	4.7971	4.63001	-0.167099	0	0.29777	1.37868	-0.0497572
00000006_6.tif	control	CB1112	cat2(e1112)	VEH	17.5	12.104	4.7971	3.49053	-1.30657	0	0.29777	1.03938	-0.389058
00000006_6.tif	control	CB1112	cat2(e1112)	VEH	17.38	12.193	4.7971	3.41413	-1.38298	0	0.29777	1.01662	-0.41181
00000006_6.tif	control	CB1112	cat2(e1112)	VEH	16.969	12.823	4.7971	3.37429	-1.42282	0	0.29777	1.00476	-0.423672
00000006_6.tif	control	CB1112	cat2(e1112)	VEH	17.115	13.198	4.7971	3.72075	-1.07635	0	0.29777	1.10793	-0.320505
00000006_6.tif	control	CB1112	cat2(e1112)	VEH	21.568	6.231	4.7971	8.63253	3.83542	1	0.29777	2.57051	1.14207
00000006_6.tif	control	CB1112	cat2(e1112)	VEH	21.498	5.905	4.7971	8.75206	3.95496	1	0.29777	2.6061	1.17767
0000007_30.tif	control	N2	wt	VEH	14.391	16.557	4.87481	4.70509	-0.169721	0	0.29777	1.40103	-0.0505378
0000007_30.tif	control	N2	wt	VEH	14.26	16.156	4.87481	4.32606	-0.548748	0	0.29777	1.28817	-0.163401
0000007_30.tif	control	N2	wt	VEH	14.578	15.552	4.87481	3.68562	-1.18919	0	0.29777	1.09747	-0.354104
0000007_30.tif	control	N2	wt	VEH	12.766	15.422	4.87481	4.1559	-0.718908	0	0.29777	1.2375	-0.214069
0000007_30.tif	control	N2	wt	VEH	13.828	14.385	4.87481	2.73942	-2.13539	0	0.29777	0.815716	-0.635855
0000007_30.tif	control	N2	wt	VEH	13.729	14.286	4.87481	2.69272	-2.18208	0	0.29777	0.801812	-0.649759
0000007_30.tif	control	N2	wt	VEH	14.234	13.938	4.87481	2.17362	-2.70119	0	0.29777	0.647238	-0.804334
0000007_30.tif	control	N2	wt	VEH	11.099	13.635	4.87481	4.22816	-0.646651	0	0.29777	1.25902	-0.192553
0000007_30.tif	control	N2	wt	VEH	12.979	13.062	4.87481	2.29397	-2.58084	0	0.29777	0.683075	-0.768496
0000007_30.tif	control	N2	wt	VEH	12.594	12.12	4.87481	2.3657	-2.50911	0	0.29777	0.704435	-0.747136
0000007_30.tif	control	N2	wt	VEH	10.807	11.917	4.87481	4.14112	-0.733683	0	0.29777	1.2331	-0.218469
0000007_30.tif	control	N2	wt	VEH	11.635	9.479	4.87481	4.09448	-0.780322	0	0.29777	1.21921	-0.232357
0000007_30.tif	control	N2	wt	VEH	11.599	9.385	4.87481	4.17921	-0.695596	0	0.29777	1.24444	-0.207128
0000007_30.tif	control	N2	wt	VEH	16.391	10.948	4.87481	1.72053	-3.15428	0	0.29777	0.512322	-0.93925
0000007_30.tif	control	N2	wt	VEH	15.844	11.594	4.87481	0.942071	-3.93274	0	0.29777	0.28052	-1.17105
0000007_30.tif	control	N2	wt	VEH	15.812	11.656	4.87481	0.893833	-3.98097	0	0.29777	0.266157	-1.18541
0000007_30.tif	control	N2	wt	VEH	15.328	14.458	4.87481	2.60091	-2.2739	0	0.29777	0.774473	-0.677099
0000007_30.tif	control	N2	wt	VEH	15.292	14.531	4.87481	2.66827	-2.20654	0	0.29777	0.79453	-0.657041
0000007_30.tif	control	N2	wt	VEH	15.292	14.781	4.87481	2.91636	-1.95845	0	0.29777	0.868404	-0.583167
0000007_30.tif	control	N2	wt	VEH	15.224	14.859	4.87481	2.98678	-1.88803	0	0.29777	0.889373	-0.562198
0000007_30.tif	control	N2	wt	VEH	15.995	14.865	4.87481	3.15858	-1.71623	0	0.29777	0.940529	-0.511042
0000007_30.tif	control	N2	wt	VEH	17.167	14.901	4.87481	3.74436	-1.13045	0	0.29777	1.11496	-0.336614
0000007_30.tif	control	N2	wt	VEH	17.281	14.906	4.87481	3.81698	-1.05783	0	0.29777	1.13658	-0.314989
0000007_30.tif	control	N2	wt	VEH	18.38	14.302	4.87481	4.19768	-0.677127	0	0.29777	1.24994	-0.201628
0000007_30.tif	control	N2	wt	VEH	18.427	14.25	4.87481	4.20674	-0.668066	0	0.29777	1.25264	-0.19893
0000007_30.tif	control	N2	wt	VEH	18.234	10.615	4.87481	3.52288	-1.35193	0	0.29777	1.04901	-0.402563
0000007_30.tif	control	N2	wt	VEH	18.849	10.224	4.87481	4.2399	-0.63491	0	0.29777	1.26251	-0.189057
0000007_30.tif	control	N2	wt	VEH	18.932	10.078	4.87481	4.37464	-0.500164	0	0.29777	1.30264	-0.148934
0000010_12.tif	control	CB1112	cat2(e1112)	DA	6.906	13.406	4.54188	7.10063	2.55875	1	0.29777	2.11436	0.761919
0000010_12.tif	control	CB1112	cat2(e1112)	DA	7.269	13.161	4.54188	6.67051	2.12862	1	0.29777	1.98628	0.63384
0000010_12.tif	control	CB1112	cat2(e1112)	DA	7.311	12.967	4.54188	6.55854	2.01666	1	0.29777	1.95294	0.6005
0000010_12.tif	control	CB1112	cat2(e1112)	DA	7.116	11.78	4.54188	6.41556	1.87368	1	0.29777	1.91036	0.557925
0000010_12.tif	control	CB1112	cat2(e1112)	DA	6.991	11.578	4.54188	6.50411	1.96223	1	0.29777	1.93673	0.584293
0000010_12.tif	control	CB1112	cat2(e1112)	DA	11.812	6.536	4.54188	4.34435	-0.197532	0	0.29777	1.29362	-0.0588191
0000010_12.tif	control	CB1112	cat2(e1112)	DA	11.812	6.63	4.54188	4.25714	-0.28474	0	0.29777	1.26765	-0.084787
0000010_12.tif	control	CB1112	cat2(e1112)	DA	11.953	6.505	4.54188	4.32342	-0.218469	0	0.29777	1.28738	-0.0650534
0000010_12.tif	control	CB1112	cat2(e1112)	DA	11.328	9.411	4.54188	2.39043	-2.15145	0	0.29777	0.711799	-0.640638
0000010_12.tif	control	CB1112	cat2(e1112)	DA	11.927	9.849	4.54188	1.65659	-2.8853	0	0.29777	0.493282	-0.859155
0000010_12.tif	control	CB1112	cat2(e1112)	DA	10.302	11.01	4.54188	3.1455	-1.39638	0	0.29777	0.936637	-0.4158
0000010_12.tif	control	CB1112	cat2(e1112)	DA	10.339	11.464	4.54188	3.20437	-1.33752	0	0.29777	0.954164	-0.398273
0000010_12.tif	control	CB1112	cat2(e1112)	DA	13.557	18.755	4.54188	8.1832	3.64131	1	0.29777	2.43671	1.08427
0000010_12.tif	control	CB1112	cat2(e1112)	DA	13.427	18.625	4.54188	8.05201	3.51012	1	0.29777	2.39765	1.04521
0000010_12.tif	control	CB1112	cat2(e1112)	DA	14.099	14.901	4.54188	4.3814	-0.160479	0	0.29777	1.30465	-0.0477858
0000010_12.tif	control	CB1112	cat2(e1112)	DA	14.854	14.698	4.54188	4.36813	-0.17375	0	0.29777	1.3007	-0.0517375
0000010_12.tif	control	CB1112	cat2(e1112)	DA	14.651	14.417	4.54188	4.03721	-0.50467	0	0.29777	1.20216	-0.150276
0000010_12.tif	control	CB1112	cat2(e1112)	DA	12.333	11.323	4.54188	1.31816	-3.22372	0	0.29777	0.39251	-0.959927
0000010_12.tif	control	CB1112	cat2(e1112)	DA	12.63	11.057	4.54188	0.923918	-3.61797	0	0.29777	0.275115	-1.07732
0000010_12.tif	control	CB1112	cat2(e1112)	DA	13.75	11.391	4.54188	0.883183	-3.6587	0	0.29777	0.262986	-1.08945
0000010_12.tif	control	CB1112	cat2(e1112)	DA	13.839	11.495	4.54188	1.01399	-3.5279	0	0.29777	0.301935	-1.0505
0000010_12.tif	control	CB1112	cat2(e1112)	DA	14.021	11.417	4.54188	1.03786	-3.50402	0	0.29777	0.309043	-1.04339
0000010_12.tif	control	CB1112	cat2(e1112)	DA	14.109	11.458	4.54188	1.12343	-3.41846	0	0.29777	0.334523	-1.01791
0000010_12.tif	control	CB1112	cat2(e1112)	DA	14.474	11.26	4.54188	1.26064	-3.28124	0	0.29777	0.375381	-0.977055
0000010_12.tif	control	CB1112	cat2(e1112)	DA	14.5	11.193	4.54188	1.24791	-3.29397	0	0.29777	0.371591	-0.980845
0000010_12.tif	control	CB1112	cat2(e1112)	DA	12.76	10.484	4.54188	0.663001	-3.87888	0	0.29777	0.197422	-1.15502
0000010_12.tif	control	CB1112	cat2(e1112)	DA	12.974	10.359	4.54188	0.491981	-4.0499	0	0.29777	0.146497	-1.20594
0000010_12.tif	control	CB1112	cat2(e1112)	DA	13.688	10.76	4.54188	0.329257	-4.21263	0	0.29777	0.0980428	-1.25439
0000010_12.tif	control	CB1112	cat2(e1112)	DA	14.885	10.339	4.54188	1.48653	-3.05535	0	0.29777	0.442645	-0.909792
0000010_12.tif	control	CB1112	cat2(e1112)	DA	14.844	10.219	4.54188	1.47025	-3.07163	0	0.29777	0.437797	-0.914639
0000010_12.tif	control	CB1112	cat2(e1112)	DA	15.297	9.224	4.54188	2.31391	-2.22797	0	0.29777	0.689014	-0.663422
0000010_12.tif	control	CB1112	cat2(e1112)	DA	14.245	9.536	4.54188	1.32701	-3.21487	0	0.29777	0.395143	-0.957293
0000010_12.tif	control	CB1112	cat2(e1112)	DA	12.526	9.5	4.54188	1.39471	-3.14718	0	0.29777	0.415302	-0.937135
0000010_12.tif	control	CB1112	cat2(e1112)	DA	12.547	9.297	4.54188	1.54437	-2.99751	0	0.29777	0.459867	-0.89257
0000010_12.tif	control	CB1112	cat2(e1112)	DA	12.917	9.375	4.54188	1.29815	-3.24373	0	0.29777	0.386551	-0.965885
0000010_12.tif	control	CB1112	cat2(e1112)	DA	13.521	7.516	4.54188	3.05877	-1.48312	0	0.29777	0.91081	-0.441627
0000010_12.tif	control	CB1112	cat2(e1112)	DA	12.339	7.036	4.54188	3.69763	-0.844256	0	0.29777	1.10104	-0.251394
0000010_12.tif	control	CB1112	cat2(e1112)	DA	12.073	6.708	4.54188	4.09201	-0.449872	0	0.29777	1.21848	-0.133958
0000010_12.tif	control	CB1112	cat2(e1112)	DA	12.682	6.526	4.54188	4.1132	-0.428681	0	0.29777	1.22479	-0.127648
0000010_12.tif	control	CB1112	cat2(e1112)	DA	12.536	6.24	4.54188	4.42166	-0.120227	0	0.29777	1.31664	-0.0358
0000010_12.tif	control	CB1112	cat2(e1112)	DA	13.802	6.865	4.54188	3.72793	-0.81395	0	0.29777	1.11007	-0.24237
0000010_12.tif	control	CB1112	cat2(e1112)	DA	15.891	8.641	4.54188	3.139	-1.40289	0	0.29777	0.934699	-0.417738
0000010_12.tif	control	CB1112	cat2(e1112)	DA	15.833	8.75	4.54188	3.02661	-1.51527	0	0.29777	0.901234	-0.451202
0000010_12.tif	control	CB1112	cat2(e1112)	DA	16.224	11.589	4.54188	2.98521	-1.55667	0	0.29777	0.888907	-0.463529
0000010_12.tif	control	CB1112	cat2(e1112)	DA	17.156	12.573	4.54188	4.2403	-0.301587	0	0.29777	1.26263	-0.0898034
0000010_12.tif	control	CB1112	cat2(e1112)	DA	16.885	15.635	4.54188	6.13603	1.59415	1	0.29777	1.82713	0.474689
0000010_12.tif	control	CB1112	cat2(e1112)	DA	17.042	15.802	4.54188	6.36263	1.82075	1	0.29777	1.8946	0.542164
0000010_12.tif	control	CB1112	cat2(e1112)	DA	17.13	15.911	4.54188	6.50235	1.96047	1	0.29777	1.93621	0.583769
0000010_40.tif	predator	N2	wt	DA	5.812	5.354	4.83856	10.0243	5.18574	1	0.29777	2.98494	1.54416
0000010_40.tif	predator	N2	wt	DA	6.536	3.925	4.83856	10.3914	5.55284	1	0.29777	3.09425	1.65347
0000010_40.tif	predator	N2	wt	DA	7.814	6.432	4.83856	7.77494	2.93638	1	0.29777	2.31515	0.874366
0000010_40.tif	predator	N2	wt	DA	9.405	5.467	4.83856	7.32025	2.48168	1	0.29777	2.17975	0.738971
0000010_40.tif	predator	N2	wt	DA	9.203	7.286	4.83856	6.15674	1.31817	1	0.29777	1.83329	0.392512
0000010_40.tif	predator	N2	wt	DA	6.252	7.252	4.83856	8.65539	3.81683	1	0.29777	2.57732	1.13654
0000010_40.tif	predator	N2	wt	DA	7.252	8.55	4.83856	7.20707	2.3685	1	0.29777	2.14605	0.705269
0000010_40.tif	predator	N2	wt	DA	6.238	12.186	4.83856	7.77737	2.93881	1	0.29777	2.31587	0.875089
0000010_40.tif	predator	N2	wt	DA	5.731	13.755	4.83856	8.60895	3.77039	1	0.29777	2.56349	1.12271
0000010_40.tif	predator	N2	wt	DA	5.856	13.852	4.83856	8.51931	3.68075	1	0.29777	2.53679	1.09602
0000010_40.tif	predator	N2	wt	DA	7.953	14.082	4.83856	6.65497	1.81641	1	0.29777	1.98165	0.540872
0000010_40.tif	predator	N2	wt	DA	7.863	14.005	4.83856	6.70368	1.86512	1	0.29777	1.99615	0.555375
0000010_40.tif	predator	N2	wt	DA	9.092	12.991	4.83856	5.17941	0.340845	1	0.29777	1.54227	0.101493
0000010_40.tif	predator	N2	wt	DA	9.043	12.866	4.83856	5.18398	0.345419	1	0.29777	1.54363	0.102855
0000010_40.tif	predator	N2	wt	DA	12.207	19.72	4.83856	8.69412	3.85556	1	0.29777	2.58885	1.14807
0000010_40.tif	predator	N2	wt	DA	11.943	17.627	4.83856	6.73111	1.89255	1	0.29777	2.00432	0.563544
0000010_40.tif	predator	N2	wt	DA	12.012	17.509	4.83856	6.59796	1.7594	1	0.29777	1.96468	0.523897
0000010_40.tif	predator	N2	wt	DA	11.408	16.453	4.83856	5.83434	0.995777	1	0.29777	1.73729	0.296513
0000010_40.tif	predator	N2	wt	DA	11.304	16.467	4.83856	5.89295	1.05439	1	0.29777	1.75474	0.313966
0000010_40.tif	predator	N2	wt	DA	11.491	14.505	4.83856	4.11882	-0.719747	0	0.29777	1.22646	-0.214319
0000010_40.tif	predator	N2	wt	DA	12.533	5.97	4.83856	5.42224	0.583677	1	0.29777	1.61458	0.173802
0000010_40.tif	predator	N2	wt	DA	12.533	5.714	4.83856	5.6697	0.831139	1	0.29777	1.68827	0.247488
0000010_40.tif	predator	N2	wt	DA	14.686	4.675	4.83856	6.56902	1.73046	1	0.29777	1.95606	0.515279
0000010_40.tif	predator	N2	wt	DA	15.901	5.665	4.83856	5.87062	1.03205	1	0.29777	1.74809	0.307315
0000010_40.tif	predator	N2	wt	DA	16.63	7.144	4.83856	4.86228	0.0237214	1	0.29777	1.44784	0.00706353
0000010_40.tif	predator	N2	wt	DA	16.519	7.172	4.83856	4.77842	-0.060141	0	0.29777	1.42287	-0.0179082
0000010_40.tif	predator	N2	wt	DA	15.102	17.464	4.83856	6.36556	1.52699	1	0.29777	1.89547	0.454693
0000010_40.tif	predator	N2	wt	DA	15.04	17.582	4.83856	6.47095	1.63239	1	0.29777	1.92686	0.486076
0000010_40.tif	predator	N2	wt	DA	22.283	16.512	4.83856	9.87797	5.03941	1	0.29777	2.94136	1.50059
0000010_40.tif	predator	N2	wt	DA	18.484	10.925	4.83856	4.53952	-0.299043	0	0.29777	1.35173	-0.0890459
0000010_40.tif	predator	N2	wt	DA	17.505	10.856	4.83856	3.56891	-1.26965	0	0.29777	1.06271	-0.378065
0000010_40.tif	predator	N2	wt	DA	18.366	10.349	4.83856	4.49487	-0.34369	0	0.29777	1.33844	-0.102341
0000010_40.tif	predator	N2	wt	DA	18.783	10.418	4.83856	4.89338	0.0548126	1	0.29777	1.4571	0.0163215
0000010_40.tif	predator	N2	wt	DA	17.602	1.321	4.83856	10.5342	5.69563	1	0.29777	3.13677	1.69599
0000010_40.tif	predator	N2	wt	DA	22.661	15.13	4.83856	9.55252	4.71395	1	0.29777	2.84445	1.40367
0000011_14.tif	predator	CB1112	cat2(e1112)	DA	8.469	7.438	4.72931	6.87899	2.14968	1	0.29777	2.04836	0.640111
0000011_14.tif	predator	CB1112	cat2(e1112)	DA	8.172	7.877	4.72931	6.89944	2.17013	1	0.29777	2.05445	0.646199
0000011_14.tif	predator	CB1112	cat2(e1112)	DA	7.866	15.717	4.72931	7.69956	2.97025	1	0.29777	2.2927	0.884452
0000011_14.tif	predator	CB1112	cat2(e1112)	DA	12.557	18.599	4.72931	7.48227	2.75296	1	0.29777	2.228	0.819749
0000011_14.tif	predator	CB1112	cat2(e1112)	DA	14.161	17.807	4.72931	6.515	1.78569	1	0.29777	1.93997	0.531726
0000011_14.tif	predator	CB1112	cat2(e1112)	DA	12.314	17.092	4.72931	6.08881	1.3595	1	0.29777	1.81306	0.404819
0000011_14.tif	predator	CB1112	cat2(e1112)	DA	11.898	16.53	4.72931	5.70833	0.979019	1	0.29777	1.69977	0.291522
0000011_14.tif	predator	CB1112	cat2(e1112)	DA	11.988	16.349	4.72931	5.50648	0.777168	1	0.29777	1.63966	0.231417
0000011_14.tif	predator	CB1112	cat2(e1112)	DA	13.411	13.755	4.72931	2.57641	-2.1529	0	0.29777	0.767179	-0.641068
0000011_14.tif	predator	CB1112	cat2(e1112)	DA	12.849	13.172	4.72931	2.29598	-2.43333	0	0.29777	0.683674	-0.724572
0000011_14.tif	predator	CB1112	cat2(e1112)	DA	14.036	12.943	4.72931	1.65619	-3.07312	0	0.29777	0.493163	-0.915083
0000011_14.tif	predator	CB1112	cat2(e1112)	DA	13.884	12.845	4.72931	1.57857	-3.15073	0	0.29777	0.470052	-0.938194
0000011_14.tif	predator	CB1112	cat2(e1112)	DA	13.168	12.477	4.72931	1.54991	-3.1794	0	0.29777	0.461517	-0.946729
0000011_14.tif	predator	CB1112	cat2(e1112)	DA	12.786	11.286	4.72931	1.38101	-3.3483	0	0.29777	0.411224	-0.997022
0000011_14.tif	predator	CB1112	cat2(e1112)	DA	14.127	11.453	4.72931	0.165895	-4.56341	0	0.29777	0.0493984	-1.35885
0000011_14.tif	predator	CB1112	cat2(e1112)	DA	13.898	11.363	4.72931	0.278212	-4.4511	0	0.29777	0.0828432	-1.3254
0000011_14.tif	predator	CB1112	cat2(e1112)	DA	13.689	10.766	4.72931	0.710746	-4.01856	0	0.29777	0.211639	-1.19661
0000011_14.tif	predator	CB1112	cat2(e1112)	DA	13.675	10.668	4.72931	0.794632	-3.93468	0	0.29777	0.236618	-1.17163
0000011_14.tif	predator	CB1112	cat2(e1112)	DA	14.231	10.175	4.72931	1.11883	-3.61048	0	0.29777	0.333155	-1.07509
0000011_14.tif	predator	CB1112	cat2(e1112)	DA	15.03	10.807	4.72931	0.989946	-3.73936	0	0.29777	0.294776	-1.11347
0000011_14.tif	predator	CB1112	cat2(e1112)	DA	16.036	10.884	4.72931	1.91301	-2.81629	0	0.29777	0.569638	-0.838608
0000011_14.tif	predator	CB1112	cat2(e1112)	DA	14.509	12.682	4.72931	1.43146	-3.29785	0	0.29777	0.426244	-0.982002
0000011_14.tif	predator	CB1112	cat2(e1112)	DA	18.453	12.842	4.72931	4.55766	-0.171645	0	0.29777	1.35714	-0.0511109
0000011_14.tif	predator	CB1112	cat2(e1112)	DA	16.925	14.589	4.72931	4.29846	-0.430847	0	0.29777	1.27995	-0.128293
0000011_14.tif	predator	CB1112	cat2(e1112)	DA	17.002	14.651	4.72931	4.39546	-0.333845	0	0.29777	1.30884	-0.0994089
0000011_14.tif	predator	CB1112	cat2(e1112)	DA	18.866	19.866	4.72931	9.77722	5.04791	1	0.29777	2.91136	1.50312
0000011_14.tif	predator	CB1112	cat2(e1112)	DA	19.033	19.964	4.72931	9.94392	5.21461	1	0.29777	2.961	1.55275
0000011_14.tif	predator	CB1112	cat2(e1112)	DA	20.123	19.498	4.72931	10.1396	5.41033	1	0.29777	3.01928	1.61104
0000011_14.tif	predator	CB1112	cat2(e1112)	DA	19.95	19.422	4.72931	9.97697	5.24766	1	0.29777	2.97084	1.5626
0000011_14.tif	predator	CB1112	cat2(e1112)	DA	20.714	15.911	4.72931	8.01239	3.28308	1	0.29777	2.38585	0.977603
0000011_14.tif	predator	CB1112	cat2(e1112)	DA	21.283	4.786	4.72931	9.64186	4.91255	1	0.29777	2.87106	1.46281
0000011_14.tif	predator	CB1112	cat2(e1112)	DA	20.741	3.884	4.72931	9.90434	5.17503	1	0.29777	2.94922	1.54097
0000011_44.tif	predator	N2	wt	VEH	4.734	12.198	4.73449	7.69336	2.95887	1	0.29777	2.29085	0.881063
0000011_44.tif	predator	N2	wt	VEH	4.906	11.656	4.73449	7.42113	2.68664	1	0.29777	2.20979	0.800001
0000011_44.tif	predator	N2	wt	VEH	7.141	11.115	4.73449	5.13194	0.397452	1	0.29777	1.52814	0.118349
0000011_44.tif	predator	N2	wt	VEH	6.938	11.094	4.73449	5.33101	0.596526	1	0.29777	1.58742	0.177628
0000011_44.tif	predator	N2	wt	VEH	6.25	10.354	4.73449	5.98541	1.25092	1	0.29777	1.78228	0.372487
0000011_44.tif	predator	N2	wt	VEH	9.677	10.542	4.73449	2.55766	-2.17683	0	0.29777	0.761594	-0.648195
0000011_44.tif	predator	N2	wt	VEH	8.536	10.141	4.73449	3.71387	-1.02062	0	0.29777	1.10588	-0.303909
0000011_44.tif	predator	N2	wt	VEH	12.682	2.479	4.73449	8.01753	3.28304	1	0.29777	2.38738	0.97759
0000011_44.tif	predator	N2	wt	VEH	13.922	3.411	4.73449	7.27163	2.53715	1	0.29777	2.16527	0.755486
0000011_44.tif	predator	N2	wt	VEH	14.151	3.484	4.73449	7.25775	2.52326	1	0.29777	2.16114	0.751351
0000011_44.tif	predator	N2	wt	VEH	14.312	3.542	4.73449	7.24634	2.51185	1	0.29777	2.15774	0.747954
0000011_44.tif	predator	N2	wt	VEH	13.698	4.521	4.73449	6.14009	1.4056	1	0.29777	1.82833	0.418545
0000011_44.tif	predator	N2	wt	VEH	13.432	5.422	4.73449	5.20183	0.467343	1	0.29777	1.54895	0.139161
0000011_44.tif	predator	N2	wt	VEH	13.406	6.245	4.73449	4.39803	-0.336454	0	0.29777	1.3096	-0.100186
0000011_44.tif	predator	N2	wt	VEH	11.177	15.281	4.73449	4.91207	0.177584	1	0.29777	1.46267	0.0528792
0000011_44.tif	predator	N2	wt	VEH	13.604	15.286	4.73449	4.99361	0.259118	1	0.29777	1.48695	0.0771575
0000011_44.tif	predator	N2	wt	VEH	11.385	18.156	4.73449	7.71883	2.98434	1	0.29777	2.29844	0.888648
0000011_44.tif	predator	N2	wt	VEH	13.453	20.745	4.73449	10.3332	5.59867	1	0.29777	3.0769	1.66711
0000011_44.tif	predator	N2	wt	VEH	14.286	20.953	4.73449	10.6682	5.93372	1	0.29777	3.17667	1.76688
0000011_44.tif	predator	N2	wt	VEH	15.214	13.964	4.73449	4.58157	-0.152917	0	0.29777	1.36425	-0.045534
0000011_44.tif	predator	N2	wt	VEH	17.281	13.318	4.73449	5.78824	1.05376	1	0.29777	1.72357	0.313777
0000011_44.tif	predator	N2	wt	VEH	18.432	13.24	4.73449	6.78312	2.04863	1	0.29777	2.01981	0.610021
0000011_44.tif	predator	N2	wt	VEH	17.031	10.802	4.73449	4.80753	0.0730402	1	0.29777	1.43154	0.0217492
0000011_44.tif	predator	N2	wt	VEH	14.906	7.115	4.73449	4.29997	-0.434518	0	0.29777	1.2804	-0.129386
0000011_44.tif	predator	N2	wt	VEH	14.771	3.594	4.73449	7.34224	2.60775	1	0.29777	2.1863	0.77651
0000011_44.tif	predator	N2	wt	VEH	15.859	2.703	4.73449	8.58397	3.84948	1	0.29777	2.55605	1.14626
0000013_32.tif	control	N2	wt	DA	10.927	5.354	4.73956	7.39387	2.65431	1	0.29777	2.20167	0.790373
0000013_32.tif	control	N2	wt	DA	10.189	7.54	4.73956	6.14765	1.40809	1	0.29777	1.83059	0.419286
0000013_32.tif	control	N2	wt	DA	11.578	9.245	4.73956	3.98287	-0.75669	0	0.29777	1.18598	-0.22532
0000013_32.tif	control	N2	wt	DA	11.646	9.245	4.73956	3.92966	-0.809904	0	0.29777	1.17013	-0.241165
0000013_32.tif	control	N2	wt	DA	10.76	10.12	4.73956	4.2554	-0.48416	0	0.29777	1.26713	-0.144168
0000013_32.tif	control	N2	wt	DA	10.88	10.307	4.73956	4.07632	-0.663242	0	0.29777	1.21381	-0.197494
0000013_32.tif	control	N2	wt	DA	11.474	10.672	4.73956	3.39589	-1.34367	0	0.29777	1.01119	-0.400106
0000013_32.tif	control	N2	wt	DA	11.536	10.76	4.73956	3.31063	-1.42893	0	0.29777	0.985807	-0.425492
0000013_32.tif	control	N2	wt	DA	12.464	11.188	4.73956	2.30346	-2.4361	0	0.29777	0.685902	-0.725398
0000013_32.tif	control	N2	wt	DA	12.641	11.453	4.73956	2.08267	-2.65689	0	0.29777	0.620157	-0.791143
0000013_32.tif	control	N2	wt	DA	12.135	12.417	4.73956	2.6689	-2.07067	0	0.29777	0.794717	-0.616582
0000013_32.tif	control	N2	wt	DA	12.583	12.474	4.73956	2.25885	-2.48072	0	0.29777	0.672616	-0.738683
0000013_32.tif	control	N2	wt	DA	14.667	12.24	4.73956	0.533578	-4.20598	0	0.29777	0.158883	-1.25242
0000013_32.tif	control	N2	wt	DA	11.724	13.203	4.73956	3.33756	-1.40201	0	0.29777	0.993824	-0.417475
0000013_32.tif	control	N2	wt	DA	11.682	13.312	4.73956	3.42483	-1.31473	0	0.29777	1.01981	-0.391486
0000013_32.tif	control	N2	wt	DA	13.958	12.99	4.73956	1.48527	-3.25429	0	0.29777	0.442269	-0.969031
0000013_32.tif	control	N2	wt	DA	13.958	12.859	4.73956	1.37379	-3.36577	0	0.29777	0.409074	-1.00223
0000013_32.tif	control	N2	wt	DA	14.5	13.302	4.73956	1.60751	-3.13205	0	0.29777	0.478669	-0.93263
0000013_32.tif	control	N2	wt	DA	13.76	13.922	4.73956	2.40842	-2.33114	0	0.29777	0.717156	-0.694143
0000013_32.tif	control	N2	wt	DA	12.464	14.776	4.73956	3.80107	-0.938488	0	0.29777	1.13185	-0.279454
0000013_32.tif	control	N2	wt	DA	15.057	15.595	4.73956	3.90264	-0.836926	0	0.29777	1.16209	-0.249211
0000013_32.tif	control	N2	wt	DA	14.491	15.509	4.73956	3.80719	-0.932373	0	0.29777	1.13367	-0.277633
0000013_32.tif	control	N2	wt	DA	16.575	13.984	4.73956	2.94378	-1.79578	0	0.29777	0.876571	-0.534729
0000013_32.tif	control	N2	wt	DA	16.207	13.793	4.73956	2.56792	-2.17164	0	0.29777	0.76465	-0.646649
0000013_32.tif	control	N2	wt	DA	15.769	13.53	4.73956	2.10841	-2.63115	0	0.29777	0.627822	-0.783477
0000013_32.tif	control	N2	wt	DA	18.125	10.698	4.73956	3.56314	-1.17642	0	0.29777	1.061	-0.350302
0000013_32.tif	control	N2	wt	DA	18.547	9.729	4.73956	4.31907	-0.420492	0	0.29777	1.28609	-0.12521
0000013_32.tif	control	N2	wt	DA	21.016	12.042	4.73956	6.31684	1.57727	1	0.29777	1.88096	0.469665
0000013_32.tif	control	N2	wt	DA	20.479	10.833	4.73956	5.83696	1.0974	1	0.29777	1.73807	0.326771
0000013_32.tif	control	N2	wt	DA	20.078	9.13	4.73956	5.95676	1.2172	1	0.29777	1.77374	0.362445
0000013_32.tif	control	N2	wt	DA	19.964	9.036	4.73956	5.8962	1.15663	1	0.29777	1.75571	0.344411
0000013_34.tif	control	N2	wt	VEH	10.385	4.698	5.09904	9.95307	4.85403	1	0.29777	2.96372	1.44538
0000013_34.tif	control	N2	wt	VEH	10.554	4.686	5.09904	9.86281	4.76378	1	0.29777	2.93685	1.41851
0000013_34.tif	control	N2	wt	VEH	10.776	4.929	5.09904	9.53592	4.43688	1	0.29777	2.83951	1.32117
0000013_34.tif	control	N2	wt	VEH	10.88	4.804	5.09904	9.57829	4.47925	1	0.29777	2.85213	1.33379
0000013_34.tif	control	N2	wt	VEH	11.144	5.845	5.09904	8.58012	3.48108	1	0.29777	2.5549	1.03656
0000013_34.tif	control	N2	wt	VEH	11.783	6.988	5.09904	7.28551	2.18647	1	0.29777	2.16941	0.651066
0000013_34.tif	control	N2	wt	VEH	14.667	16.521	5.09904	4.18292	-0.916115	0	0.29777	1.24555	-0.272792
0000013_34.tif	control	N2	wt	VEH	15.938	15.771	5.09904	3.11352	-1.98552	0	0.29777	0.927114	-0.591227
0000013_34.tif	control	N2	wt	VEH	14.323	15.552	5.09904	3.50099	-1.59805	0	0.29777	1.04249	-0.475851
0000013_34.tif	control	N2	wt	VEH	14.802	13.776	5.09904	1.87763	-3.2214	0	0.29777	0.559103	-0.959237
0000013_34.tif	control	N2	wt	VEH	15.047	13.323	5.09904	1.43243	-3.66661	0	0.29777	0.426533	-1.09181
0000013_34.tif	control	N2	wt	VEH	15.104	12.953	5.09904	1.25364	-3.8454	0	0.29777	0.373297	-1.14504
0000013_34.tif	control	N2	wt	VEH	15.594	12.651	5.09904	0.734654	-4.36438	0	0.29777	0.218758	-1.29958
0000013_34.tif	control	N2	wt	VEH	15.641	12.573	5.09904	0.695593	-4.40344	0	0.29777	0.207127	-1.31121
0000013_34.tif	control	N2	wt	VEH	13.536	10.609	5.09904	3.47744	-1.6216	0	0.29777	1.03548	-0.482863
0000013_34.tif	control	N2	wt	VEH	13.724	11.562	5.09904	2.83465	-2.26439	0	0.29777	0.844072	-0.674268
0000013_34.tif	control	N2	wt	VEH	13.656	10.599	5.09904	3.38799	-1.71105	0	0.29777	1.00884	-0.509499
0000013_34.tif	control	N2	wt	VEH	16.224	9.953	5.09904	2.73098	-2.36806	0	0.29777	0.813204	-0.705136
0000013_34.tif	control	N2	wt	VEH	17.641	3.104	5.09904	9.66758	4.56854	1	0.29777	2.87871	1.36037
0000013_34.tif	control	N2	wt	VEH	16.604	8.828	5.09904	3.86387	-1.23517	0	0.29777	1.15054	-0.367796
0000013_34.tif	control	N2	wt	VEH	16.568	12.245	5.09904	0.498567	-4.60047	0	0.29777	0.148458	-1.36988
0000013_34.tif	control	N2	wt	VEH	17.417	12.417	5.09904	1.12078	-3.97826	0	0.29777	0.333734	-1.18461
0000013_34.tif	control	N2	wt	VEH	16.464	12.906	5.09904	0.262053	-4.83698	0	0.29777	0.0780316	-1.44031
0000013_34.tif	control	N2	wt	VEH	18.099	14.995	5.09904	2.91314	-2.18589	0	0.29777	0.867447	-0.650894
0000013_34.tif	control	N2	wt	VEH	19.198	15.573	5.09904	4.07367	-1.02537	0	0.29777	1.21302	-0.305324
0000013_34.tif	control	N2	wt	VEH	19.318	15.562	5.09904	4.15145	-0.947592	0	0.29777	1.23618	-0.282165
0000013_34.tif	control	N2	wt	VEH	19.776	13.323	5.09904	3.50708	-1.59196	0	0.29777	1.0443	-0.474038
0000013_34.tif	control	N2	wt	VEH	20.099	9.927	5.09904	4.67017	-0.42887	0	0.29777	1.39064	-0.127705
0000013_34.tif	control	N2	wt	VEH	19.021	8.823	5.09904	4.70575	-0.393283	0	0.29777	1.40123	-0.117108
0000013_34.tif	control	N2	wt	VEH	20.781	9.099	5.09904	5.71551	0.616476	1	0.29777	1.70191	0.183568
0000013_34.tif	control	N2	wt	VEH	20.953	8.917	5.09904	5.96371	0.864673	1	0.29777	1.77581	0.257474
0000013_34.tif	control	N2	wt	VEH	21.219	9.026	5.09904	6.10641	1.00737	1	0.29777	1.81831	0.299965
0000013_34.tif	control	N2	wt	VEH	21.531	8.823	5.09904	6.47789	1.37885	1	0.29777	1.92892	0.410581
0000013_34.tif	control	N2	wt	VEH	21.599	8.052	5.09904	7.01572	1.91668	1	0.29777	2.08907	0.570731
0000013_34.tif	control	N2	wt	VEH	21.635	7.885	5.09904	7.1537	2.05466	1	0.29777	2.13016	0.611817
0000013_34.tif	control	N2	wt	VEH	21.672	7.771	5.09904	7.25784	2.1588	1	0.29777	2.16117	0.642827
0000013_34.tif	control	N2	wt	VEH	21.203	5.885	5.09904	8.3645	3.26546	1	0.29777	2.4907	0.972356
0000013_34.tif	control	N2	wt	VEH	21.333	5.833	5.09904	8.48285	3.38382	1	0.29777	2.52594	1.0076
0000013_34.tif	control	N2	wt	VEH	22.177	6.505	5.09904	8.50683	3.40779	1	0.29777	2.53308	1.01474
0000013_34.tif	control	N2	wt	VEH	22.042	6.224	5.09904	8.62297	3.52393	1	0.29777	2.56766	1.04932
0000015_16.tif	predator	CB1112	cat2(e1112)	DA	6.625	18.052	4.97924	9.49612	4.51688	1	0.29777	2.82766	1.34499
0000015_16.tif	predator	CB1112	cat2(e1112)	DA	10.561	18.165	4.97924	7.3002	2.32096	1	0.29777	2.17378	0.691111
0000015_16.tif	predator	CB1112	cat2(e1112)	DA	10.602	17.998	4.97924	7.13075	2.1515	1	0.29777	2.12332	0.640654
0000015_16.tif	predator	CB1112	cat2(e1112)	DA	9.977	15.175	4.97924	5.092	0.112763	1	0.29777	1.51625	0.0335774
0000015_16.tif	predator	CB1112	cat2(e1112)	DA	8.102	15.273	4.97924	6.57838	1.59914	1	0.29777	1.95884	0.476176
0000015_16.tif	predator	CB1112	cat2(e1112)	DA	5.714	13.741	4.97924	8.08097	3.10173	1	0.29777	2.40627	0.923601
0000015_16.tif	predator	CB1112	cat2(e1112)	DA	8.207	11.79	4.97924	5.27178	0.292541	1	0.29777	1.56978	0.08711
0000015_16.tif	predator	CB1112	cat2(e1112)	DA	8.29	9.498	4.97924	5.54138	0.562138	1	0.29777	1.65006	0.167388
0000015_16.tif	predator	CB1112	cat2(e1112)	DA	8.158	9.345	4.97924	5.71997	0.740733	1	0.29777	1.70324	0.220568
0000015_16.tif	predator	CB1112	cat2(e1112)	DA	12.925	8.141	4.97924	3.37217	-1.60707	0	0.29777	1.00413	-0.478538
0000015_16.tif	predator	CB1112	cat2(e1112)	DA	12.988	8.057	4.97924	3.44574	-1.5335	0	0.29777	1.02604	-0.456631
0000015_16.tif	predator	CB1112	cat2(e1112)	DA	11.96	14.345	4.97924	3.24784	-1.7314	0	0.29777	0.967109	-0.51556
0000015_16.tif	predator	CB1112	cat2(e1112)	DA	13.196	16.085	4.97924	4.62407	-0.355175	0	0.29777	1.37691	-0.10576
0000015_16.tif	predator	CB1112	cat2(e1112)	DA	14.106	16.286	4.97924	4.85894	-0.120305	0	0.29777	1.44685	-0.0358232
0000015_16.tif	predator	CB1112	cat2(e1112)	DA	16.502	18.238	4.97924	7.41744	2.4382	1	0.29777	2.20869	0.726023
0000015_16.tif	predator	CB1112	cat2(e1112)	DA	17.12	18.12	4.97924	7.5872	2.60796	1	0.29777	2.25924	0.776572
0000015_16.tif	predator	CB1112	cat2(e1112)	DA	14.759	14.443	4.97924	3.24172	-1.73752	0	0.29777	0.965288	-0.51738
0000015_16.tif	predator	CB1112	cat2(e1112)	DA	16.918	13.297	4.97924	3.90348	-1.07576	0	0.29777	1.16234	-0.320328
0000015_16.tif	predator	CB1112	cat2(e1112)	DA	16.898	12.116	4.97924	3.48951	-1.48974	0	0.29777	1.03907	-0.443598
0000015_16.tif	predator	CB1112	cat2(e1112)	DA	16.988	12.047	4.97924	3.56615	-1.41309	0	0.29777	1.06189	-0.420775
0000015_16.tif	predator	CB1112	cat2(e1112)	DA	18.252	10.845	4.97924	4.82353	-0.155708	0	0.29777	1.4363	-0.0463653
0000015_16.tif	predator	CB1112	cat2(e1112)	DA	18.717	10.783	4.97924	5.29265	0.313405	1	0.29777	1.57599	0.0933226
0000015_16.tif	predator	CB1112	cat2(e1112)	DA	17.53	8.887	4.97924	4.81232	-0.166919	0	0.29777	1.43297	-0.0497033
0000015_16.tif	predator	CB1112	cat2(e1112)	DA	17.231	8.589	4.97924	4.73783	-0.24141	0	0.29777	1.41078	-0.0718845
0000015_16.tif	predator	CB1112	cat2(e1112)	DA	16.536	8.505	4.97924	4.26518	-0.714058	0	0.29777	1.27004	-0.212625
0000015_16.tif	predator	CB1112	cat2(e1112)	DA	16.439	8.422	4.97924	4.25501	-0.724231	0	0.29777	1.26701	-0.215654
0000015_16.tif	predator	CB1112	cat2(e1112)	DA	16.113	6.28	4.97924	5.82378	0.844543	1	0.29777	1.73415	0.25148
0000015_16.tif	predator	CB1112	cat2(e1112)	DA	16.245	6.064	4.97924	6.0762	1.09696	1	0.29777	1.80931	0.326641
0000015_16.tif	predator	CB1112	cat2(e1112)	DA	15.023	5.724	4.97924	5.95147	0.972225	1	0.29777	1.77217	0.289499
0000015_16.tif	predator	CB1112	cat2(e1112)	DA	14.898	5.37	4.97924	6.26417	1.28493	1	0.29777	1.86528	0.382614
0000015_16.tif	predator	CB1112	cat2(e1112)	DA	18.127	6.245	4.97924	6.99908	2.01984	1	0.29777	2.08412	0.601448
0000015_16.tif	predator	CB1112	cat2(e1112)	DA	18.321	6.3	4.97924	7.08946	2.11022	1	0.29777	2.11103	0.62836
0000016_46.tif	predator	N2	wt	VEH	6.104	16.99	4.7971	7.91119	3.11408	1	0.29777	2.35571	0.927281
0000016_46.tif	predator	N2	wt	VEH	5.37	16.8	4.7971	8.48412	3.68702	1	0.29777	2.52632	1.09788
0000016_46.tif	predator	N2	wt	VEH	5.266	16.696	4.7971	8.53627	3.73916	1	0.29777	2.54184	1.11341
0000016_46.tif	predator	N2	wt	VEH	8.536	16.905	4.7971	5.82686	1.02975	1	0.29777	1.73506	0.306629
0000016_46.tif	predator	N2	wt	VEH	7.62	15.96	4.7971	6.09153	1.29443	1	0.29777	1.81388	0.385442
0000016_46.tif	predator	N2	wt	VEH	5.273	13.877	4.7971	7.82975	3.03264	1	0.29777	2.33146	0.903029
0000016_46.tif	predator	N2	wt	VEH	3.37	13.071	4.7971	9.70974	4.91264	1	0.29777	2.89127	1.46284
0000016_46.tif	predator	N2	wt	VEH	3.967	13.474	4.7971	9.11363	4.31653	1	0.29777	2.71377	1.28533
0000016_46.tif	predator	N2	wt	VEH	4.078	13.536	4.7971	9.00439	4.20728	1	0.29777	2.68124	1.2528
0000016_46.tif	predator	N2	wt	VEH	8.991	11.116	4.7971	4.6129	-0.1842	0	0.29777	1.37358	-0.0548492
0000016_46.tif	predator	N2	wt	VEH	8.026	10.665	4.7971	5.67722	0.880113	1	0.29777	1.69051	0.262071
0000016_46.tif	predator	N2	wt	VEH	7.825	10.575	4.7971	5.89715	1.10005	1	0.29777	1.756	0.327561
0000016_46.tif	predator	N2	wt	VEH	9.582	9.262	4.7971	5.30717	0.510066	1	0.29777	1.58032	0.151882
0000016_46.tif	predator	N2	wt	VEH	9.623	9.095	4.7971	5.40765	0.61054	1	0.29777	1.61023	0.181801
0000016_46.tif	predator	N2	wt	VEH	9.693	8.97	4.7971	5.46072	0.663614	1	0.29777	1.62604	0.197604
0000016_46.tif	predator	N2	wt	VEH	6.512	7.168	4.7971	8.95343	4.15633	1	0.29777	2.66606	1.23763
0000016_46.tif	predator	N2	wt	VEH	5.88	6.536	4.7971	9.84663	5.04953	1	0.29777	2.93203	1.5036
0000016_46.tif	predator	N2	wt	VEH	4.352	7.536	4.7971	10.4331	5.63602	1	0.29777	3.10667	1.67824
0000016_46.tif	predator	N2	wt	VEH	8.439	3.141	4.7971	11.1271	6.33004	1	0.29777	3.31333	1.8849
0000016_46.tif	predator	N2	wt	VEH	11.224	3.564	4.7971	9.86675	5.06965	1	0.29777	2.93802	1.50959
0000016_46.tif	predator	N2	wt	VEH	12.085	3.043	4.7971	10.2602	5.46306	1	0.29777	3.05517	1.62674
0000016_46.tif	predator	N2	wt	VEH	12.321	7.811	4.7971	5.49638	0.699275	1	0.29777	1.63666	0.208223
0000016_46.tif	predator	N2	wt	VEH	9.974	9.759	4.7971	4.67513	-0.121976	0	0.29777	1.39211	-0.0363207
0000016_46.tif	predator	N2	wt	VEH	12.134	10.988	4.7971	2.45569	-2.34141	0	0.29777	0.731232	-0.697202
0000016_46.tif	predator	N2	wt	VEH	12.094	11.115	4.7971	2.35539	-2.44172	0	0.29777	0.701364	-0.72707
0000016_46.tif	predator	N2	wt	VEH	13.453	12.547	4.7971	0.80118	-3.99592	0	0.29777	0.238567	-1.18987
0000016_46.tif	predator	N2	wt	VEH	11.865	14.005	4.7971	1.42614	-3.37097	0	0.29777	0.424661	-1.00377
0000016_46.tif	predator	N2	wt	VEH	14.137	14.634	4.7971	1.73871	-3.05839	0	0.29777	0.517736	-0.910697
0000016_46.tif	predator	N2	wt	VEH	14.061	14.8	4.7971	1.83121	-2.9659	0	0.29777	0.545278	-0.883156
0000016_46.tif	predator	N2	wt	VEH	15.554	16.248	4.7971	3.88441	-0.912697	0	0.29777	1.15666	-0.271774
0000016_46.tif	predator	N2	wt	VEH	15.214	12.554	4.7971	2.24809	-2.54902	0	0.29777	0.669413	-0.759021
0000016_46.tif	predator	N2	wt	VEH	17.391	6.141	4.7971	8.31931	3.52221	1	0.29777	2.47724	1.04881
0000016_46.tif	predator	N2	wt	VEH	18.172	5.495	4.7971	9.28259	4.48548	1	0.29777	2.76408	1.33564
0000016_46.tif	predator	N2	wt	VEH	18.057	5.391	4.7971	9.30768	4.51058	1	0.29777	2.77155	1.34311
0000019_48.tif	predator	N2	wt	VEH	5.557	13.693	4.80205	7.74744	2.94539	1	0.29777	2.30695	0.877049
0000019_48.tif	predator	N2	wt	VEH	6.467	13.102	4.80205	6.71155	1.9095	1	0.29777	1.9985	0.568593
0000019_48.tif	predator	N2	wt	VEH	6.613	12.943	4.80205	6.53175	1.7297	1	0.29777	1.94496	0.515054
0000019_48.tif	predator	N2	wt	VEH	9.148	12.943	4.80205	4.10671	-0.695336	0	0.29777	1.22285	-0.20705
0000019_48.tif	predator	N2	wt	VEH	8.877	12.873	4.80205	4.33632	-0.465723	0	0.29777	1.29123	-0.138678
0000019_48.tif	predator	N2	wt	VEH	8.905	12.387	4.80205	4.17333	-0.628714	0	0.29777	1.24269	-0.187212
0000019_48.tif	predator	N2	wt	VEH	8.96	11.568	4.80205	4.01111	-0.790938	0	0.29777	1.19439	-0.235518
0000019_48.tif	predator	N2	wt	VEH	9.071	9.071	4.80205	4.56038	-0.241663	0	0.29777	1.35795	-0.0719599
0000019_48.tif	predator	N2	wt	VEH	9.661	8.012	4.80205	4.76239	-0.0396575	0	0.29777	1.4181	-0.0118088
0000019_48.tif	predator	N2	wt	VEH	8.71	6.832	4.80205	6.2733	1.47126	1	0.29777	1.868	0.438096
0000019_48.tif	predator	N2	wt	VEH	6.092	6.102	4.80205	8.70437	3.90232	1	0.29777	2.5919	1.16199
0000019_48.tif	predator	N2	wt	VEH	7.946	6.009	4.80205	7.39625	2.59421	1	0.29777	2.20238	0.772477
0000019_48.tif	predator	N2	wt	VEH	8.398	5.398	4.80205	7.57467	2.77263	1	0.29777	2.25551	0.825605
0000019_48.tif	predator	N2	wt	VEH	8.557	5.384	4.80205	7.49111	2.68906	1	0.29777	2.23063	0.800721
0000019_48.tif	predator	N2	wt	VEH	9.293	3.224	4.80205	8.99904	4.197	1	0.29777	2.67964	1.24974
0000019_48.tif	predator	N2	wt	VEH	9.349	3.085	4.80205	9.10368	4.30164	1	0.29777	2.7108	1.2809
0000019_48.tif	predator	N2	wt	VEH	14.342	3.255	4.80205	8.29739	3.49534	1	0.29777	2.47071	1.04081
0000019_48.tif	predator	N2	wt	VEH	14.509	3.332	4.80205	8.25099	3.44894	1	0.29777	2.4569	1.02699
0000019_48.tif	predator	N2	wt	VEH	19.484	19.214	4.80205	10.1445	5.34248	1	0.29777	3.02074	1.59083
0000019_48.tif	predator	N2	wt	VEH	18.144	11.53	4.80205	5.17582	0.373772	1	0.29777	1.5412	0.111298
0000019_48.tif	predator	N2	wt	VEH	18.7	10.96	4.80205	5.7509	0.948854	1	0.29777	1.71245	0.28254
0000019_48.tif	predator	N2	wt	VEH	18.554	9.321	4.80205	5.97276	1.17072	1	0.29777	1.77851	0.348605
0000019_48.tif	predator	N2	wt	VEH	17.311	4.293	4.80205	8.36086	3.55881	1	0.29777	2.48961	1.05971
0000019_48.tif	predator	N2	wt	VEH	17.498	4.377	4.80205	8.38866	3.58661	1	0.29777	2.49789	1.06799
0000019_48.tif	predator	N2	wt	VEH	21.984	6.776	4.80205	10.1491	5.34707	1	0.29777	3.0221	1.5922
0000019_48.tif	predator	N2	wt	VEH	21.78	11.814	4.80205	8.81902	4.01697	1	0.29777	2.62604	1.19613
0000019_48.tif	predator	N2	wt	VEH	21.28	12.203	4.80205	8.34613	3.54409	1	0.29777	2.48523	1.05532
00000021_2.tif	control	CB1112	cat2(e1112)	VEH	12.63	12.458	4.94273	1.50674	-3.43599	0	0.29777	0.448663	-1.02313
00000021_2.tif	control	CB1112	cat2(e1112)	VEH	12.641	12.557	4.94273	1.51386	-3.42887	0	0.29777	0.450782	-1.02102
00000021_2.tif	control	CB1112	cat2(e1112)	VEH	12.057	12.453	4.94273	2.07459	-2.86814	0	0.29777	0.617751	-0.854046
00000021_2.tif	control	CB1112	cat2(e1112)	VEH	11.969	12.479	4.94273	2.16491	-2.77782	0	0.29777	0.644645	-0.827153
00000021_2.tif	control	CB1112	cat2(e1112)	VEH	11.958	12.557	4.94273	2.18599	-2.75674	0	0.29777	0.650924	-0.820874
00000021_2.tif	control	CB1112	cat2(e1112)	VEH	12.021	12.016	4.94273	2.11029	-2.83244	0	0.29777	0.628381	-0.843416
00000021_2.tif	control	CB1112	cat2(e1112)	VEH	12.359	12.172	4.94273	1.76209	-3.18064	0	0.29777	0.524698	-0.9471
00000021_2.tif	control	CB1112	cat2(e1112)	VEH	13.797	10.651	4.94273	1.61562	-3.32712	0	0.29777	0.481082	-0.990715
00000021_2.tif	control	CB1112	cat2(e1112)	VEH	13.87	10.604	4.94273	1.64906	-3.29367	0	0.29777	0.491041	-0.980757
00000021_2.tif	control	CB1112	cat2(e1112)	VEH	13.953	10.573	4.94273	1.66937	-3.27336	0	0.29777	0.49709	-0.974708
00000021_2.tif	control	CB1112	cat2(e1112)	VEH	12.354	9.516	4.94273	3.24134	-1.70139	0	0.29777	0.965174	-0.506624
00000021_2.tif	control	CB1112	cat2(e1112)	VEH	12.557	9.37	4.94273	3.26274	-1.67999	0	0.29777	0.971546	-0.500252
00000021_2.tif	control	CB1112	cat2(e1112)	VEH	10.844	9.604	4.94273	4.20108	-0.741652	0	0.29777	1.25096	-0.220842
00000021_2.tif	control	CB1112	cat2(e1112)	VEH	16.12	8.068	4.94273	4.62121	-0.321525	0	0.29777	1.37606	-0.0957405
00000021_2.tif	control	CB1112	cat2(e1112)	VEH	15.318	11.464	4.94273	1.42412	-3.51862	0	0.29777	0.424059	-1.04774
00000021_2.tif	control	CB1112	cat2(e1112)	VEH	15.266	11.495	4.94273	1.36361	-3.57912	0	0.29777	0.406043	-1.06575
00000021_2.tif	control	CB1112	cat2(e1112)	VEH	16.964	11.5	4.94273	2.93719	-2.00554	0	0.29777	0.874607	-0.59719
00000021_2.tif	control	CB1112	cat2(e1112)	VEH	17.042	11.453	4.94273	3.02457	-1.91816	0	0.29777	0.900627	-0.57117
00000021_2.tif	control	CB1112	cat2(e1112)	VEH	14.969	12.615	4.94273	0.930571	-4.01216	0	0.29777	0.277096	-1.1947
00000021_2.tif	control	CB1112	cat2(e1112)	VEH	15.63	13.406	4.94273	1.91146	-3.03127	0	0.29777	0.569176	-0.902622
00000021_2.tif	control	CB1112	cat2(e1112)	VEH	15.724	13.401	4.94273	1.98361	-2.95912	0	0.29777	0.590659	-0.881138
00000021_2.tif	control	CB1112	cat2(e1112)	VEH	15.792	14.995	4.94273	3.2278	-1.71493	0	0.29777	0.961143	-0.510655
0000021_42.tif	predator	N2	wt	DA	10.135	19.01	4.82288	10.155	5.33216	1	0.29777	3.02387	1.58776
0000021_42.tif	predator	N2	wt	DA	10.54	19.62	4.82288	10.444	5.62107	1	0.29777	3.1099	1.67379
0000021_42.tif	predator	N2	wt	DA	11.082	19.724	4.82288	10.2641	5.4412	1	0.29777	3.05634	1.62023
0000021_42.tif	predator	N2	wt	DA	11.568	19.391	4.82288	9.74356	4.92068	1	0.29777	2.90134	1.46523
0000021_42.tif	predator	N2	wt	DA	12.582	19.467	4.82288	9.40038	4.5775	1	0.29777	2.79915	1.36304
0000021_42.tif	predator	N2	wt	DA	11.179	16.786	4.82288	7.74647	2.92359	1	0.29777	2.30667	0.870558
0000021_42.tif	predator	N2	wt	DA	9.776	14.773	4.82288	7.41343	2.59054	1	0.29777	2.2075	0.771387
0000021_42.tif	predator	N2	wt	DA	10.422	14.071	4.82288	6.49202	1.66914	1	0.29777	1.93313	0.49702
0000021_42.tif	predator	N2	wt	DA	11.849	10.224	4.82288	4.14718	-0.675704	0	0.29777	1.2349	-0.201204
0000021_42.tif	predator	N2	wt	DA	12.259	8.988	4.82288	4.08512	-0.737761	0	0.29777	1.21643	-0.219683
0000021_42.tif	predator	N2	wt	DA	13.502	3.964	4.82288	7.17167	2.34879	1	0.29777	2.13551	0.699399
0000021_42.tif	predator	N2	wt	DA	14.498	18.214	4.82288	7.6586	2.83572	1	0.29777	2.2805	0.844391
0000021_42.tif	predator	N2	wt	DA	14.63	18.241	4.82288	7.66092	2.83804	1	0.29777	2.28119	0.845084
0000021_42.tif	predator	N2	wt	DA	15.783	18.623	4.82288	7.92718	3.1043	1	0.29777	2.36048	0.924368
0000021_42.tif	predator	N2	wt	DA	16.401	17.512	4.82288	6.82768	2.0048	1	0.29777	2.03308	0.596969
0000021_42.tif	predator	N2	wt	DA	18.401	17.936	4.82288	7.63566	2.81278	1	0.29777	2.27367	0.837561
0000021_42.tif	predator	N2	wt	DA	17.554	17.582	4.82288	7.06411	2.24123	1	0.29777	2.10348	0.667372
0000021_42.tif	predator	N2	wt	DA	17.373	17.457	4.82288	6.90328	2.0804	1	0.29777	2.05559	0.619481
0000021_42.tif	predator	N2	wt	DA	18.255	17.04	4.82288	6.74142	1.91854	1	0.29777	2.00739	0.571284
0000021_42.tif	predator	N2	wt	DA	20.53	19.109	4.82288	9.56805	4.74517	1	0.29777	2.84908	1.41297
0000021_42.tif	predator	N2	wt	DA	22.53	18.116	4.82288	9.9032	5.08032	1	0.29777	2.94888	1.51277
0000021_42.tif	predator	N2	wt	DA	22.717	17.998	4.82288	9.9411	5.11822	1	0.29777	2.96016	1.52405
0000021_42.tif	predator	N2	wt	DA	19.016	11.408	4.82288	3.12863	-1.69425	0	0.29777	0.931611	-0.504498
0000021_42.tif	predator	N2	wt	DA	18.849	8.203	4.82288	3.81044	-1.01244	0	0.29777	1.13463	-0.301476
0000021_42.tif	predator	N2	wt	DA	22.731	7.641	4.82288	7.42091	2.59803	1	0.29777	2.20972	0.773615
0000021_42.tif	predator	N2	wt	DA	22.509	6.627	4.82288	7.70355	2.88067	1	0.29777	2.29389	0.857776
0000021_42.tif	predator	N2	wt	DA	21.467	6.168	4.82288	7.12383	2.30095	1	0.29777	2.12126	0.685153
0000021_42.tif	predator	N2	wt	DA	20.62	4.814	4.82288	7.50022	2.67734	1	0.29777	2.23334	0.797231
0000021_42.tif	predator	N2	wt	DA	21.411	4.55	4.82288	8.21056	3.38768	1	0.29777	2.44486	1.00875
0000021_42.tif	predator	N2	wt	DA	23.964	15.38	4.82288	9.26505	4.44217	1	0.29777	2.75885	1.32274
0000026_20.tif	predator	CB1112	cat2(e1112)	VEH	8.312	17.167	5.23965	8.15344	2.91379	1	0.29777	2.42785	0.867639
0000026_20.tif	predator	CB1112	cat2(e1112)	VEH	11.113	18.363	5.23965	7.82191	2.58226	1	0.29777	2.32913	0.768919
0000026_20.tif	predator	CB1112	cat2(e1112)	VEH	11.328	18.238	5.23965	7.63741	2.39776	1	0.29777	2.27419	0.713982
0000026_20.tif	predator	CB1112	cat2(e1112)	VEH	9.134	12.717	5.23965	4.78221	-0.457435	0	0.29777	1.424	-0.13621
0000026_20.tif	predator	CB1112	cat2(e1112)	VEH	9.488	12.877	5.23965	4.52183	-0.717818	0	0.29777	1.34647	-0.213745
0000026_20.tif	predator	CB1112	cat2(e1112)	VEH	11.057	12.356	5.23965	2.88808	-2.35157	0	0.29777	0.859982	-0.700228
0000026_20.tif	predator	CB1112	cat2(e1112)	VEH	10.175	12.46	5.23965	3.72329	-1.51636	0	0.29777	1.10868	-0.451526
0000026_20.tif	predator	CB1112	cat2(e1112)	VEH	10.189	10.373	5.23965	3.43084	-1.80881	0	0.29777	1.0216	-0.538608
0000026_20.tif	predator	CB1112	cat2(e1112)	VEH	10.141	10.214	5.23965	3.50753	-1.73211	0	0.29777	1.04444	-0.515771
0000026_20.tif	predator	CB1112	cat2(e1112)	VEH	10.474	7.88	5.23965	4.35375	-0.885895	0	0.29777	1.29642	-0.263793
0000026_20.tif	predator	CB1112	cat2(e1112)	VEH	10.988	7.727	5.23965	4.12223	-1.11742	0	0.29777	1.22748	-0.332735
0000026_20.tif	predator	CB1112	cat2(e1112)	VEH	12.043	7.839	5.23965	3.45611	-1.78354	0	0.29777	1.02913	-0.531084
0000026_20.tif	predator	CB1112	cat2(e1112)	VEH	12.53	7.977	5.23965	3.13933	-2.10032	0	0.29777	0.934797	-0.625413
0000026_20.tif	predator	CB1112	cat2(e1112)	VEH	14.641	7.783	5.23965	3.33086	-1.90878	0	0.29777	0.991831	-0.568379
0000026_20.tif	predator	CB1112	cat2(e1112)	VEH	16.106	9.748	5.23965	2.7986	-2.44104	0	0.29777	0.833341	-0.726869
0000026_20.tif	predator	CB1112	cat2(e1112)	VEH	16.078	9.825	5.23965	2.74113	-2.49852	0	0.29777	0.816226	-0.743984
0000026_20.tif	predator	CB1112	cat2(e1112)	VEH	13.092	10.262	5.23965	0.829661	-4.40999	0	0.29777	0.247048	-1.31316
0000026_20.tif	predator	CB1112	cat2(e1112)	VEH	13.96	11.2	5.23965	0.467347	-4.7723	0	0.29777	0.139162	-1.42105
0000026_20.tif	predator	CB1112	cat2(e1112)	VEH	13.918	11.97	5.23965	1.08814	-4.15151	0	0.29777	0.324015	-1.23619
0000026_20.tif	predator	CB1112	cat2(e1112)	VEH	14.606	12.165	5.23965	1.60394	-3.63571	0	0.29777	0.477605	-1.08261
0000026_20.tif	predator	CB1112	cat2(e1112)	VEH	14.696	12.137	5.23965	1.64278	-3.59687	0	0.29777	0.489171	-1.07104
0000026_20.tif	predator	CB1112	cat2(e1112)	VEH	16.425	17.665	5.23965	7.3066	2.06695	1	0.29777	2.17569	0.615477
0000026_20.tif	predator	CB1112	cat2(e1112)	VEH	16.502	18.262	5.23965	7.88797	2.64832	1	0.29777	2.3488	0.78859
0000026_20.tif	predator	CB1112	cat2(e1112)	VEH	18.061	14.116	5.23965	5.49926	0.259609	1	0.29777	1.63751	0.0773038
0000026_20.tif	predator	CB1112	cat2(e1112)	VEH	17.977	13.234	5.23965	4.96657	-0.273076	0	0.29777	1.4789	-0.081314
0000026_20.tif	predator	CB1112	cat2(e1112)	VEH	18.075	4.63	5.23965	7.74977	2.51012	1	0.29777	2.30765	0.747438
0000026_20.tif	predator	CB1112	cat2(e1112)	VEH	18.068	4.512	5.23965	7.8421	2.60245	1	0.29777	2.33514	0.774932
0000031_18.tif	predator	CB1112	cat2(e1112)	DA	8.26	10	4.63557	7.60928	2.97371	1	0.29777	2.26581	0.885482
0000031_18.tif	predator	CB1112	cat2(e1112)	DA	9.05	8.509	4.63557	7.24679	2.61122	1	0.29777	2.15788	0.777544
0000031_18.tif	predator	CB1112	cat2(e1112)	DA	11.224	6.29	4.63557	6.70599	2.07042	1	0.29777	1.99684	0.616509
0000031_18.tif	predator	CB1112	cat2(e1112)	DA	10.384	5.859	4.63557	7.5993	2.96374	1	0.29777	2.26284	0.882512
0000031_18.tif	predator	CB1112	cat2(e1112)	DA	9.814	5.484	4.63557	8.26898	3.63342	1	0.29777	2.46225	1.08192
0000031_18.tif	predator	CB1112	cat2(e1112)	DA	14.5	1.552	4.63557	9.7502	5.11463	1	0.29777	2.90332	1.52298
0000031_18.tif	predator	CB1112	cat2(e1112)	DA	14.401	1.771	4.63557	9.54681	4.91125	1	0.29777	2.84275	1.46242
0000031_18.tif	predator	CB1112	cat2(e1112)	DA	13.182	2.557	4.63557	9.04064	4.40507	1	0.29777	2.69203	1.3117
0000031_18.tif	predator	CB1112	cat2(e1112)	DA	14.672	13.312	4.63557	2.36399	-2.27157	0	0.29777	0.703925	-0.676407
0000031_18.tif	predator	CB1112	cat2(e1112)	DA	14.708	13.51	4.63557	2.5256	-2.10997	0	0.29777	0.752048	-0.628285
0000031_18.tif	predator	CB1112	cat2(e1112)	DA	16.073	20.182	4.63557	8.96809	4.33252	1	0.29777	2.67043	1.29009
0000031_18.tif	predator	CB1112	cat2(e1112)	DA	17.854	7.005	4.63557	4.70071	0.065146	1	0.29777	1.39973	0.0193985
0000031_18.tif	predator	CB1112	cat2(e1112)	DA	17.875	6.854	4.63557	4.84562	0.210056	1	0.29777	1.44288	0.0625483
0000031_18.tif	predator	CB1112	cat2(e1112)	DA	19.443	15.953	4.63557	5.99119	1.35562	1	0.29777	1.784	0.403664
0000031_18.tif	predator	CB1112	cat2(e1112)	DA	18.583	16.323	4.63557	5.82736	1.1918	1	0.29777	1.73521	0.354882
0000031_18.tif	predator	CB1112	cat2(e1112)	DA	18.453	16.302	4.63557	5.74717	1.11161	1	0.29777	1.71134	0.331004
0000031_18.tif	predator	CB1112	cat2(e1112)	DA	21.198	16.474	4.63557	7.55429	2.91873	1	0.29777	2.24944	0.86911
0000031_18.tif	predator	CB1112	cat2(e1112)	DA	21.031	13.734	4.63557	5.83034	1.19477	1	0.29777	1.7361	0.355767
0000031_18.tif	predator	CB1112	cat2(e1112)	DA	20.703	13.359	4.63557	5.37626	0.7407	1	0.29777	1.60089	0.220558
0000031_18.tif	predator	CB1112	cat2(e1112)	DA	22.505	11.927	4.63557	6.77112	2.13555	1	0.29777	2.01624	0.635903
0000031_18.tif	predator	CB1112	cat2(e1112)	DA	21.12	8.714	4.63557	5.90651	1.27094	1	0.29777	1.75878	0.378448
0000031_18.tif	predator	CB1112	cat2(e1112)	DA	21.156	8.578	4.63557	5.99776	1.36219	1	0.29777	1.78595	0.40562
0000031_18.tif	predator	CB1112	cat2(e1112)	DA	22.844	6.875	4.63557	8.30046	3.6649	1	0.29777	2.47163	1.0913
0000031_18.tif	predator	CB1112	cat2(e1112)	DA	23.026	7.302	4.63557	8.24487	3.60931	1	0.29777	2.45508	1.07474
0000031_18.tif	predator	CB1112	cat2(e1112)	DA	23.135	7.318	4.63557	8.33344	3.69788	1	0.29777	2.48145	1.10112
0000031_18.tif	predator	CB1112	cat2(e1112)	DA	23.026	7.5	4.63557	8.15267	3.5171	1	0.29777	2.42762	1.04729
0000031_18.tif	predator	CB1112	cat2(e1112)	DA	23.651	7.005	4.63557	8.93601	4.30044	1	0.29777	2.66087	1.28054
0000031_18.tif	predator	CB1112	cat2(e1112)	DA	24.224	8.427	4.63557	8.90216	4.2666	1	0.29777	2.6508	1.27046
0000031_18.tif	predator	CB1112	cat2(e1112)	DA	23.484	10.979	4.63557	7.71673	3.08117	1	0.29777	2.29781	0.917479
0000031_18.tif	predator	CB1112	cat2(e1112)	DA	25.38	11.297	4.63557	9.60932	4.97375	1	0.29777	2.86137	1.48103
0000031_18.tif	predator	CB1112	cat2(e1112)	DA	25.469	11.151	4.63557	9.69824	5.06267	1	0.29777	2.88784	1.50751
0000031_18.tif	predator	CB1112	cat2(e1112)	DA	23.375	16.349	4.63557	9.17266	4.5371	1	0.29777	2.73134	1.35101
0000033_22.tif	predator	CB1112	cat2(e1112)	VEH	6.26	12.896	5.14066	9.36066	4.22	1	0.29777	2.78732	1.25659
0000033_22.tif	predator	CB1112	cat2(e1112)	VEH	6.405	14.474	5.14066	9.54666	4.406	1	0.29777	2.84271	1.31197
0000033_22.tif	predator	CB1112	cat2(e1112)	VEH	7.759	4.262	5.14066	10.7858	5.64518	1	0.29777	3.2117	1.68097
0000033_22.tif	predator	CB1112	cat2(e1112)	VEH	12.38	8.083	5.14066	4.82564	-0.315025	0	0.29777	1.43693	-0.093805
0000033_22.tif	predator	CB1112	cat2(e1112)	VEH	12.594	11.484	5.14066	2.96274	-2.17793	0	0.29777	0.882214	-0.648521
0000033_22.tif	predator	CB1112	cat2(e1112)	VEH	13.062	13.312	5.14066	2.94906	-2.1916	0	0.29777	0.878142	-0.652593
0000033_22.tif	predator	CB1112	cat2(e1112)	VEH	13.74	14.354	5.14066	3.19095	-1.94971	0	0.29777	0.950169	-0.580566
0000033_22.tif	predator	CB1112	cat2(e1112)	VEH	13.859	14.427	5.14066	3.18678	-1.95388	0	0.29777	0.948927	-0.581808
0000033_22.tif	predator	CB1112	cat2(e1112)	VEH	16.714	13.047	5.14066	1.76415	-3.37651	0	0.29777	0.52531	-1.00542
0000033_22.tif	predator	CB1112	cat2(e1112)	VEH	16.474	12.943	5.14066	1.53143	-3.60923	0	0.29777	0.456015	-1.07472
0000033_22.tif	predator	CB1112	cat2(e1112)	VEH	17.089	11.339	5.14066	1.58934	-3.55133	0	0.29777	0.473257	-1.05748
0000033_22.tif	predator	CB1112	cat2(e1112)	VEH	17.016	11.141	5.14066	1.58046	-3.5602	0	0.29777	0.470613	-1.06012
0000033_22.tif	predator	CB1112	cat2(e1112)	VEH	17.005	11.016	5.14066	1.62081	-3.51985	0	0.29777	0.482629	-1.04811
0000033_22.tif	predator	CB1112	cat2(e1112)	VEH	15.75	11.026	5.14066	0.72692	-4.41374	0	0.29777	0.216455	-1.31428
0000033_22.tif	predator	CB1112	cat2(e1112)	VEH	16.078	8.776	5.14066	2.99544	-2.14522	0	0.29777	0.891952	-0.638783
0000033_22.tif	predator	CB1112	cat2(e1112)	VEH	16.089	7.865	5.14066	3.89688	-1.24379	0	0.29777	1.16037	-0.370362
0000033_22.tif	predator	CB1112	cat2(e1112)	VEH	19.401	4.755	5.14066	7.96368	2.82302	1	0.29777	2.37135	0.840612
0000033_22.tif	predator	CB1112	cat2(e1112)	VEH	19.37	5.005	5.14066	7.73048	2.58982	1	0.29777	2.3019	0.77117
0000033_22.tif	predator	CB1112	cat2(e1112)	VEH	17.484	13.661	5.14066	2.73933	-2.40133	0	0.29777	0.815691	-0.715044
0000033_22.tif	predator	CB1112	cat2(e1112)	VEH	18.99	14.599	5.14066	4.48552	-0.655144	0	0.29777	1.33565	-0.195082
0000033_22.tif	predator	CB1112	cat2(e1112)	VEH	20.755	19.085	5.14066	9.01707	3.87641	1	0.29777	2.68501	1.15428
0000034_28.tif	control	N2	wt	DA	10.396	9.818	4.73449	3.56576	-1.16873	0	0.29777	1.06178	-0.348013
0000034_28.tif	control	N2	wt	DA	10.422	9.854	4.73449	3.53483	-1.19966	0	0.29777	1.05257	-0.357222
0000034_28.tif	control	N2	wt	DA	10.568	10.906	4.73449	3.39994	-1.33455	0	0.29777	1.0124	-0.39739
0000034_28.tif	control	N2	wt	DA	11.01	10.432	4.73449	2.91318	-1.82131	0	0.29777	0.867458	-0.54233
0000034_28.tif	control	N2	wt	DA	11.63	10.177	4.73449	2.29844	-2.43604	0	0.29777	0.684408	-0.725381
0000034_28.tif	control	N2	wt	DA	11.552	9.911	4.73449	2.41013	-2.32435	0	0.29777	0.717665	-0.692123
0000034_28.tif	control	N2	wt	DA	11.464	9.854	4.73449	2.50735	-2.22714	0	0.29777	0.746613	-0.663176
0000034_28.tif	control	N2	wt	DA	11.542	9.719	4.73449	2.46197	-2.27252	0	0.29777	0.733101	-0.676688
0000034_28.tif	control	N2	wt	DA	12.115	9.792	4.73449	1.8909	-2.84359	0	0.29777	0.563053	-0.846736
0000034_28.tif	control	N2	wt	DA	12.104	9.859	4.73449	1.88288	-2.85161	0	0.29777	0.560664	-0.849125
0000034_28.tif	control	N2	wt	DA	12.911	10.599	4.73449	1.04145	-3.69304	0	0.29777	0.310113	-1.09968
0000034_28.tif	control	N2	wt	DA	12.828	10.641	4.73449	1.1323	-3.60219	0	0.29777	0.337165	-1.07262
0000034_28.tif	control	N2	wt	DA	12.703	11.161	4.73449	1.46469	-3.2698	0	0.29777	0.43614	-0.973649
[truncated: 805 more rows]
