# Supplementary material for: Dopamine signaling regulates predator-driven changes in Caenorhabditis elegans’ egg laying behavior
Source: eLife. 2023 Jul 11;12:e83957. doi: 10.7554/eLife.83957 (PMC10335835; doi:10.7554/eLife.83957)
Supplement: Figure 8—source data 2. — For each test arena, data tabulate the arena, predator exposure condition, genotype, <x,y> coordinates in pixels, lawn radius in pixels, the egg distance from arena center in pixels, the egg distance from lawn edge in pixels, position as 1 (off) or 0 (on) lawn, the conversion factor for pixel data in mm-per-pixel, the calculated distance from center in mm, the calculated distance from the lawn edge in mm. [file elife-83957-fig8-data2.xlsx]

## Sheet: Figure8B-D
Arena	Condition	Strain	Genotype	X	Y	LawnRadius	DistCenterPx	DistEdgePx	off	PxScale	DistCenterMm	DistEdgeMm
0000001_17.tif	control	N2	wt	7.51	9.281	5.22413	6.60114	1.37701	1	0.29777	1.96562	0.410032
0000001_17.tif	control	N2	wt	7.623	10.005	5.22413	6.25672	1.03259	1	0.29777	1.86306	0.307473
0000001_17.tif	control	N2	wt	8.464	9.748	5.22413	5.54217	0.318033	1	0.29777	1.65029	0.0947006
0000001_17.tif	control	N2	wt	9.491	7.984	5.22413	5.59926	0.375131	1	0.29777	1.66729	0.111703
0000001_17.tif	control	N2	wt	9.665	8.13	5.22413	5.37232	0.148189	1	0.29777	1.59972	0.0441263
0000001_17.tif	control	N2	wt	9.373	9.387	5.22413	4.87129	-0.352843	0	0.29777	1.45052	-0.105066
0000001_17.tif	control	N2	wt	9.394	9.29	5.22413	4.90101	-0.323121	0	0.29777	1.45937	-0.0962158
0000001_17.tif	control	N2	wt	9.477	9.102	5.22413	4.92806	-0.296069	0	0.29777	1.46743	-0.0881605
0000001_17.tif	control	N2	wt	9.491	9.345	5.22413	4.78951	-0.434622	0	0.29777	1.42617	-0.129417
0000001_17.tif	control	N2	wt	9.644	9.325	5.22413	4.66831	-0.555826	0	0.29777	1.39008	-0.165508
0000001_17.tif	control	N2	wt	9.38	9.769	5.22413	4.69113	-0.533004	0	0.29777	1.39688	-0.158713
0000001_17.tif	control	N2	wt	9.304	9.845	5.22413	4.72889	-0.495246	0	0.29777	1.40812	-0.147469
0000001_17.tif	control	N2	wt	9.255	10.005	5.22413	4.71202	-0.512114	0	0.29777	1.4031	-0.152492
0000001_17.tif	control	N2	wt	9.13	10.04	5.22413	4.81573	-0.408407	0	0.29777	1.43398	-0.121611
0000001_17.tif	control	N2	wt	9.401	10.13	5.22413	4.53046	-0.693674	0	0.29777	1.34904	-0.206555
0000001_17.tif	control	N2	wt	9.387	10.262	5.22413	4.49801	-0.726123	0	0.29777	1.33937	-0.216218
0000001_17.tif	control	N2	wt	8.825	10.776	5.22413	4.90372	-0.320414	0	0.29777	1.46018	-0.0954097
0000001_17.tif	control	N2	wt	9.901	9.179	5.22413	4.53224	-0.691892	0	0.29777	1.34957	-0.206025
0000001_17.tif	control	N2	wt	9.769	9.63	5.22413	4.40715	-0.816986	0	0.29777	1.31232	-0.243274
0000001_17.tif	control	N2	wt	10.457	9.464	5.22413	3.91364	-1.31049	0	0.29777	1.16537	-0.390224
0000001_17.tif	control	N2	wt	10.339	9.38	5.22413	4.05849	-1.16565	0	0.29777	1.2085	-0.347095
0000001_17.tif	control	N2	wt	11.123	8.193	5.22413	4.35579	-0.868345	0	0.29777	1.29702	-0.258567
0000001_17.tif	control	N2	wt	11.436	8.019	5.22413	4.33259	-0.891544	0	0.29777	1.29012	-0.265475
0000001_17.tif	control	N2	wt	10.589	10.22	5.22413	3.40645	-1.81768	0	0.29777	1.01434	-0.541251
0000001_17.tif	control	N2	wt	10.47	10.859	5.22413	3.28457	-1.93956	0	0.29777	0.978047	-0.577543
0000001_17.tif	control	N2	wt	10.54	11.262	5.22413	3.12908	-2.09505	0	0.29777	0.931747	-0.623844
0000001_17.tif	control	N2	wt	9.727	11.207	5.22413	3.94128	-1.28285	0	0.29777	1.1736	-0.381994
0000001_17.tif	control	N2	wt	9.797	11.325	5.22413	3.85704	-1.36709	0	0.29777	1.14851	-0.407078
0000001_17.tif	control	N2	wt	9.582	11.609	5.22413	4.05063	-1.1735	0	0.29777	1.20616	-0.349434
0000001_17.tif	control	N2	wt	9.262	11.102	5.22413	4.41654	-0.807593	0	0.29777	1.31511	-0.240477
0000001_17.tif	control	N2	wt	11.373	11.123	5.22413	2.34382	-2.88032	0	0.29777	0.697918	-0.857672
0000001_17.tif	control	N2	wt	11.45	11.068	5.22413	2.28569	-2.93845	0	0.29777	0.680609	-0.874981
0000001_17.tif	control	N2	wt	9.839	12.172	5.22413	3.81387	-1.41027	0	0.29777	1.13565	-0.419936
0000001_17.tif	control	N2	wt	9.964	12.505	5.22413	3.74193	-1.4822	0	0.29777	1.11424	-0.441355
0000001_17.tif	control	N2	wt	9.894	12.929	5.22413	3.91612	-1.30802	0	0.29777	1.1661	-0.389488
0000001_17.tif	control	N2	wt	10.262	12.734	5.22413	3.5074	-1.71673	0	0.29777	1.0444	-0.511191
0000001_17.tif	control	N2	wt	10.533	12.7	5.22413	3.23797	-1.98617	0	0.29777	0.96417	-0.591421
0000001_17.tif	control	N2	wt	9.95	14.005	5.22413	4.31334	-0.910794	0	0.29777	1.28438	-0.271207
0000001_17.tif	control	N2	wt	9.686	13.936	5.22413	4.50687	-0.717261	0	0.29777	1.34201	-0.213579
0000001_17.tif	control	N2	wt	12.526	16.234	5.22413	4.61305	-0.611081	0	0.29777	1.37363	-0.181961
0000001_17.tif	control	N2	wt	13.547	16.411	5.22413	4.65674	-0.567394	0	0.29777	1.38664	-0.168953
0000001_17.tif	control	N2	wt	13.542	16.318	5.22413	4.56385	-0.660285	0	0.29777	1.35898	-0.196613
0000001_17.tif	control	N2	wt	14.391	16.823	5.22413	5.12482	-0.099317	0	0.29777	1.52602	-0.0295736
0000001_17.tif	control	N2	wt	14.526	16.766	5.22413	5.09048	-0.133658	0	0.29777	1.51579	-0.0397995
0000001_17.tif	control	N2	wt	14.297	16.135	5.22413	4.4305	-0.793638	0	0.29777	1.31927	-0.236322
0000001_17.tif	control	N2	wt	14.292	16.036	5.22413	4.33188	-0.892251	0	0.29777	1.2899	-0.265686
0000001_17.tif	control	N2	wt	14.234	15.542	5.22413	3.83486	-1.38927	0	0.29777	1.14191	-0.413683
0000001_17.tif	control	N2	wt	14.062	14.719	5.22413	2.99532	-2.22882	0	0.29777	0.891915	-0.663675
0000001_17.tif	control	N2	wt	12.719	13.375	5.22413	1.85858	-3.36555	0	0.29777	0.553429	-1.00216
0000001_17.tif	control	N2	wt	12.792	13.359	5.22413	1.80971	-3.41442	0	0.29777	0.538878	-1.01671
0000001_17.tif	control	N2	wt	12.312	13.172	5.22413	1.9352	-3.28893	0	0.29777	0.576246	-0.979345
0000001_17.tif	control	N2	wt	11.505	12.635	5.22413	2.30001	-2.92413	0	0.29777	0.684873	-0.870718
0000001_17.tif	control	N2	wt	11.615	12.766	5.22413	2.25441	-2.96973	0	0.29777	0.671294	-0.884296
0000001_17.tif	control	N2	wt	11.885	12.661	5.22413	1.96618	-3.25795	0	0.29777	0.585469	-0.970121
0000001_17.tif	control	N2	wt	11.979	12.344	5.22413	1.75292	-3.47122	0	0.29777	0.521966	-1.03362
0000001_17.tif	control	N2	wt	11.484	11.87	5.22413	2.14908	-3.07505	0	0.29777	0.639931	-0.915659
0000001_17.tif	control	N2	wt	11.547	11.771	5.22413	2.08306	-3.14107	0	0.29777	0.620273	-0.935317
0000001_17.tif	control	N2	wt	11.552	11.516	5.22413	2.0917	-3.13243	0	0.29777	0.622845	-0.932745
0000001_17.tif	control	N2	wt	11.615	11.479	5.22413	2.03381	-3.19032	0	0.29777	0.605609	-0.949981
0000001_17.tif	control	N2	wt	12.115	11.375	5.22413	1.56193	-3.6622	0	0.29777	0.465096	-1.09049
0000001_17.tif	control	N2	wt	12.266	11.146	5.22413	1.49378	-3.73035	0	0.29777	0.444803	-1.11079
0000001_17.tif	control	N2	wt	12.573	11.927	5.22413	1.0709	-4.15323	0	0.29777	0.318883	-1.23671
0000001_17.tif	control	N2	wt	12.682	11.984	5.22413	0.975267	-4.24887	0	0.29777	0.290405	-1.26519
0000001_17.tif	control	N2	wt	12.734	12.161	5.22413	0.983693	-4.24044	0	0.29777	0.292914	-1.26268
0000001_17.tif	control	N2	wt	12.76	11.76	5.22413	0.870014	-4.35412	0	0.29777	0.259064	-1.29653
0000001_17.tif	control	N2	wt	12.927	12.729	5.22413	1.2012	-4.02293	0	0.29777	0.357682	-1.19791
0000001_17.tif	control	N2	wt	13.099	12.729	5.22413	1.10934	-4.11479	0	0.29777	0.330328	-1.22526
0000001_17.tif	control	N2	wt	13.104	12.609	5.22413	1.00299	-4.22114	0	0.29777	0.298661	-1.25693
0000001_17.tif	control	N2	wt	13.182	13.156	5.22413	1.47089	-3.75325	0	0.29777	0.437986	-1.1176
0000001_17.tif	control	N2	wt	13.302	13.432	5.22413	1.70878	-3.51536	0	0.29777	0.508822	-1.04677
0000001_17.tif	control	N2	wt	13.406	13.661	5.22413	1.91912	-3.30502	0	0.29777	0.571456	-0.984135
0000001_17.tif	control	N2	wt	14.411	13.651	5.22413	2.05056	-3.17358	0	0.29777	0.610594	-0.944996
0000001_17.tif	control	N2	wt	14.552	13.432	5.22413	1.91374	-3.31039	0	0.29777	0.569855	-0.985735
0000001_17.tif	control	N2	wt	14.24	13.245	5.22413	1.61003	-3.6141	0	0.29777	0.479419	-1.07617
0000001_17.tif	control	N2	wt	14.344	13.146	5.22413	1.56355	-3.66059	0	0.29777	0.465577	-1.09001
0000001_17.tif	control	N2	wt	14.271	13.042	5.22413	1.43779	-3.78634	0	0.29777	0.428132	-1.12746
0000001_17.tif	control	N2	wt	13.516	12.771	5.22413	1.02238	-4.20176	0	0.29777	0.304433	-1.25116
0000001_17.tif	control	N2	wt	14.448	12.786	5.22413	1.31609	-3.90805	0	0.29777	0.391891	-1.1637
0000001_17.tif	control	N2	wt	13.859	12.375	5.22413	0.660939	-4.56319	0	0.29777	0.196808	-1.35878
0000001_17.tif	control	N2	wt	13.943	12.219	5.22413	0.559701	-4.66443	0	0.29777	0.166662	-1.38893
0000001_17.tif	control	N2	wt	14.057	12.151	5.22413	0.582362	-4.64177	0	0.29777	0.17341	-1.38218
0000001_17.tif	control	N2	wt	14.146	12.115	5.22413	0.629171	-4.59496	0	0.29777	0.187348	-1.36824
0000001_17.tif	control	N2	wt	13.964	12.089	5.22413	0.472347	-4.75179	0	0.29777	0.140651	-1.41494
0000001_17.tif	control	N2	wt	13.953	11.974	5.22413	0.390244	-4.83389	0	0.29777	0.116203	-1.43939
0000001_17.tif	control	N2	wt	14.146	11.818	5.22413	0.519832	-4.7043	0	0.29777	0.15479	-1.4008
0000001_17.tif	control	N2	wt	14.432	12.292	5.22413	0.96518	-4.25895	0	0.29777	0.287402	-1.26819
0000001_17.tif	control	N2	wt	14.469	12.203	5.22413	0.951118	-4.27302	0	0.29777	0.283214	-1.27238
0000001_17.tif	control	N2	wt	13.589	11.823	5.22413	0.079404	-5.14473	0	0.29777	0.0236441	-1.53195
0000001_17.tif	control	N2	wt	12.927	11.146	5.22413	0.930102	-4.29403	0	0.29777	0.276957	-1.27863
0000001_17.tif	control	N2	wt	13.099	11.047	5.22413	0.885	-4.33913	0	0.29777	0.263526	-1.29206
0000001_17.tif	control	N2	wt	13.24	11.417	5.22413	0.516085	-4.70805	0	0.29777	0.153675	-1.40192
0000001_17.tif	control	N2	wt	13.76	11.333	5.22413	0.44157	-4.78256	0	0.29777	0.131486	-1.4241
0000001_17.tif	control	N2	wt	13.901	11.385	5.22413	0.458629	-4.7655	0	0.29777	0.136566	-1.41902
0000001_17.tif	control	N2	wt	14.177	11.365	5.22413	0.671795	-4.55234	0	0.29777	0.200041	-1.35555
0000001_17.tif	control	N2	wt	14.318	11.104	5.22413	0.947177	-4.27696	0	0.29777	0.282041	-1.27355
0000001_17.tif	control	N2	wt	14.271	11.005	5.22413	0.986601	-4.23753	0	0.29777	0.29378	-1.26181
0000001_17.tif	control	N2	wt	14.12	10.411	5.22413	1.43054	-3.7936	0	0.29777	0.425971	-1.12962
0000001_17.tif	control	N2	wt	13.839	10.505	5.22413	1.26735	-3.95678	0	0.29777	0.377379	-1.17821
0000001_17.tif	control	N2	wt	13.021	10.12	5.22413	1.74474	-3.4794	0	0.29777	0.51953	-1.03606
0000001_17.tif	control	N2	wt	13.042	9.411	5.22413	2.41663	-2.80751	0	0.29777	0.719599	-0.835992
0000001_17.tif	control	N2	wt	13.115	9.266	5.22413	2.54172	-2.68241	0	0.29777	0.756848	-0.798742
0000001_17.tif	control	N2	wt	12.948	9.214	5.22413	2.63093	-2.5932	0	0.29777	0.783413	-0.772178
0000001_17.tif	control	N2	wt	13.719	9.479	5.22413	2.27774	-2.94639	0	0.29777	0.678242	-0.877348
0000001_17.tif	control	N2	wt	14.203	9.661	5.22413	2.17098	-3.05315	0	0.29777	0.646453	-0.909137
0000001_17.tif	control	N2	wt	14.302	9.401	5.22413	2.44804	-2.77609	0	0.29777	0.728953	-0.826637
0000001_17.tif	control	N2	wt	14.297	9.297	5.22413	2.54689	-2.67724	0	0.29777	0.758388	-0.797203
0000001_17.tif	control	N2	wt	13.901	8.906	5.22413	2.86186	-2.36227	0	0.29777	0.852176	-0.703414
0000001_17.tif	control	N2	wt	14.146	8.781	5.22413	3.01843	-2.2057	0	0.29777	0.898799	-0.656792
0000001_17.tif	control	N2	wt	11.599	8.146	5.22413	4.14124	-1.0829	0	0.29777	1.23314	-0.322454
0000001_17.tif	control	N2	wt	11.984	7.302	5.22413	4.74748	-0.476658	0	0.29777	1.41366	-0.141934
0000001_17.tif	control	N2	wt	12.333	7.354	5.22413	4.58814	-0.635996	0	0.29777	1.36621	-0.18938
0000001_17.tif	control	N2	wt	13.526	8.281	5.22413	3.47556	-1.74858	0	0.29777	1.03492	-0.520674
0000001_17.tif	control	N2	wt	13.417	8.167	5.22413	3.59432	-1.62982	0	0.29777	1.07028	-0.485311
0000001_17.tif	control	N2	wt	13.354	7.469	5.22413	4.29488	-0.929256	0	0.29777	1.27889	-0.276705
0000001_17.tif	control	N2	wt	14.042	8.068	5.22413	3.70995	-1.51419	0	0.29777	1.10471	-0.450879
0000001_17.tif	control	N2	wt	14.047	8.292	5.22413	3.48802	-1.73612	0	0.29777	1.03863	-0.516964
0000001_17.tif	control	N2	wt	16.406	7.078	5.22413	5.4388	0.214663	1	0.29777	1.61951	0.0639201
0000001_17.tif	control	N2	wt	15.708	8.042	5.22413	4.25493	-0.969201	0	0.29777	1.26699	-0.288599
0000001_17.tif	control	N2	wt	15.703	8.156	5.22413	4.15333	-1.07081	0	0.29777	1.23674	-0.318854
0000001_17.tif	control	N2	wt	14.891	8.531	5.22413	3.46183	-1.7623	0	0.29777	1.03083	-0.52476
0000001_17.tif	control	N2	wt	15.219	9.943	5.22413	2.41003	-2.8141	0	0.29777	0.717636	-0.837954
0000001_17.tif	control	N2	wt	15.635	9.641	5.22413	2.91359	-2.31054	0	0.29777	0.86758	-0.68801
0000001_17.tif	control	N2	wt	15.812	9.771	5.22413	2.94913	-2.275	0	0.29777	0.878163	-0.677427
0000001_17.tif	control	N2	wt	15.964	9.516	5.22413	3.2343	-1.98984	0	0.29777	0.963077	-0.592514
0000001_17.tif	control	N2	wt	16.328	9.724	5.22413	3.37701	-1.84713	0	0.29777	1.00557	-0.550019
0000001_17.tif	control	N2	wt	16.375	9.651	5.22413	3.45859	-1.76554	0	0.29777	1.02986	-0.525726
0000001_17.tif	control	N2	wt	15.208	10.688	5.22413	1.90488	-3.31925	0	0.29777	0.567217	-0.988374
0000001_17.tif	control	N2	wt	15.073	11.042	5.22413	1.60954	-3.61459	0	0.29777	0.479273	-1.07632
0000001_17.tif	control	N2	wt	14.557	11.406	5.22413	0.99052	-4.23361	0	0.29777	0.294947	-1.26064
0000001_17.tif	control	N2	wt	14.568	11.49	5.22413	0.974715	-4.24942	0	0.29777	0.290241	-1.26535
0000001_17.tif	control	N2	wt	14.578	11.615	5.22413	0.958282	-4.26585	0	0.29777	0.285348	-1.27024
0000001_17.tif	control	N2	wt	14.745	11.547	5.22413	1.13423	-4.0899	0	0.29777	0.337741	-1.21785
0000001_17.tif	control	N2	wt	14.677	11.802	5.22413	1.04805	-4.17608	0	0.29777	0.312079	-1.24351
0000001_17.tif	control	N2	wt	14.656	12.068	5.22413	1.07268	-4.15145	0	0.29777	0.319412	-1.23618
0000001_17.tif	control	N2	wt	15.375	11.25	5.22413	1.8166	-3.40753	0	0.29777	0.54093	-1.01466
0000001_17.tif	control	N2	wt	15.448	11.151	5.22413	1.91571	-3.30842	0	0.29777	0.570441	-0.98515
0000001_17.tif	control	N2	wt	15.932	10.448	5.22413	2.64716	-2.57697	0	0.29777	0.788245	-0.767346
0000001_17.tif	control	N2	wt	15.589	11.729	5.22413	1.95917	-3.26496	0	0.29777	0.583383	-0.972207
0000001_17.tif	control	N2	wt	15.776	11.849	5.22413	2.14806	-3.07608	0	0.29777	0.639627	-0.915963
0000001_17.tif	control	N2	wt	15.885	11.818	5.22413	2.25588	-2.96825	0	0.29777	0.671733	-0.883857
0000001_17.tif	control	N2	wt	15.948	11.849	5.22413	2.31991	-2.90423	0	0.29777	0.690798	-0.864792
0000001_17.tif	control	N2	wt	16.542	10.76	5.22413	3.0773	-2.14683	0	0.29777	0.916327	-0.639263
0000001_17.tif	control	N2	wt	16.474	11.375	5.22413	2.86927	-2.35486	0	0.29777	0.854384	-0.701206
0000001_17.tif	control	N2	wt	16.922	11.24	5.22413	3.33204	-1.89209	0	0.29777	0.992181	-0.563409
0000001_17.tif	control	N2	wt	17.073	11.219	5.22413	3.48447	-1.73966	0	0.29777	1.03757	-0.518019
0000001_17.tif	control	N2	wt	16.688	10.438	5.22413	3.32954	-1.89459	0	0.29777	0.991438	-0.564152
0000001_17.tif	control	N2	wt	17	10.208	5.22413	3.70811	-1.51602	0	0.29777	1.10417	-0.451425
0000001_17.tif	control	N2	wt	17.318	10.448	5.22413	3.91275	-1.31139	0	0.29777	1.1651	-0.390491
0000001_17.tif	control	N2	wt	17.766	10.208	5.22413	4.41585	-0.808287	0	0.29777	1.31491	-0.240683
0000001_17.tif	control	N2	wt	17.849	10.193	5.22413	4.49887	-0.725266	0	0.29777	1.33963	-0.215963
0000001_17.tif	control	N2	wt	17.797	9.906	5.22413	4.5588	-0.66533	0	0.29777	1.35747	-0.198115
0000001_17.tif	control	N2	wt	17.807	9.781	5.22413	4.61996	-0.604176	0	0.29777	1.37568	-0.179906
0000001_17.tif	control	N2	wt	17.844	9.594	5.22413	4.73579	-0.488342	0	0.29777	1.41018	-0.145414
0000001_17.tif	control	N2	wt	17.906	9.396	5.22413	4.88355	-0.340584	0	0.29777	1.45417	-0.101416
0000001_17.tif	control	N2	wt	18.349	9.849	5.22413	5.08938	-0.134753	0	0.29777	1.51546	-0.0401253
0000001_17.tif	control	N2	wt	18.573	9.557	5.22413	5.40966	0.185529	1	0.29777	1.61084	0.0552451
0000001_17.tif	control	N2	wt	18.776	9.625	5.22413	5.5694	0.345266	1	0.29777	1.6584	0.10281
0000001_17.tif	control	N2	wt	18.87	9.62	5.22413	5.65825	0.434119	1	0.29777	1.68486	0.129268
0000001_17.tif	control	N2	wt	19.016	9.693	5.22413	5.76722	0.543088	1	0.29777	1.71731	0.161715
0000001_17.tif	control	N2	wt	18.776	10.078	5.22413	5.41236	0.188227	1	0.29777	1.61164	0.0560483
0000001_17.tif	control	N2	wt	18.667	10.391	5.22413	5.21842	-0.0057176	0	0.29777	1.55389	-0.00170253
0000001_17.tif	control	N2	wt	19.328	10.208	5.22413	5.90427	0.680137	1	0.29777	1.75811	0.202524
0000001_17.tif	control	N2	wt	19.469	9.969	5.22413	6.10604	0.881906	1	0.29777	1.8182	0.262605
0000001_17.tif	control	N2	wt	19.422	9.802	5.22413	6.1124	0.88827	1	0.29777	1.82009	0.2645
0000001_17.tif	control	N2	wt	15.255	12.203	5.22413	1.68562	-3.53851	0	0.29777	0.501928	-1.05366
0000001_17.tif	control	N2	wt	15.458	12.479	5.22413	1.96615	-3.25798	0	0.29777	0.585462	-0.970129
0000001_17.tif	control	N2	wt	14.708	13.203	5.22413	1.80521	-3.41892	0	0.29777	0.537538	-1.01805
0000001_17.tif	control	N2	wt	14.682	13.411	5.22413	1.9619	-3.26224	0	0.29777	0.584194	-0.971396
0000001_17.tif	control	N2	wt	14.776	13.656	5.22413	2.21971	-3.00442	0	0.29777	0.660963	-0.894627
0000001_17.tif	control	N2	wt	14.859	13.677	5.22413	2.28134	-2.94279	0	0.29777	0.679315	-0.876275
0000001_17.tif	control	N2	wt	15.391	13.635	5.22413	2.57595	-2.64818	0	0.29777	0.767041	-0.788549
0000001_17.tif	control	N2	wt	15.146	12.99	5.22413	1.95537	-3.26876	0	0.29777	0.582251	-0.973339
0000001_17.tif	control	N2	wt	15.109	12.88	5.22413	1.85824	-3.36589	0	0.29777	0.553329	-1.00226
0000001_17.tif	control	N2	wt	15.469	12.818	5.22413	2.12412	-3.10001	0	0.29777	0.6325	-0.923091
0000001_17.tif	control	N2	wt	15.552	12.734	5.22413	2.15697	-3.06716	0	0.29777	0.642281	-0.913309
0000001_17.tif	control	N2	wt	15.698	12.63	5.22413	2.2455	-2.97864	0	0.29777	0.668641	-0.886949
0000001_17.tif	control	N2	wt	16.245	12.526	5.22413	2.72629	-2.49784	0	0.29777	0.811808	-0.743782
0000001_17.tif	control	N2	wt	16.292	12.729	5.22413	2.83459	-2.38954	0	0.29777	0.844057	-0.711533
0000001_17.tif	control	N2	wt	16.323	12.812	5.22413	2.89301	-2.33113	0	0.29777	0.861451	-0.694139
0000001_17.tif	control	N2	wt	16.406	12.891	5.22413	2.99945	-2.22469	0	0.29777	0.893145	-0.662445
0000001_17.tif	control	N2	wt	16.854	12.703	5.22413	3.36049	-1.86365	0	0.29777	1.00065	-0.554938
0000001_17.tif	control	N2	wt	17.474	12.172	5.22413	3.86655	-1.35758	0	0.29777	1.15134	-0.404247
0000001_17.tif	control	N2	wt	15.323	16.474	5.22413	5.0135	-0.210631	0	0.29777	1.49287	-0.0627195
0000001_17.tif	control	N2	wt	15.401	16.365	5.22413	4.93848	-0.285658	0	0.29777	1.47053	-0.0850604
0000001_17.tif	control	N2	wt	16.781	16.25	5.22413	5.48943	0.265295	1	0.29777	1.63459	0.0789969
0000001_17.tif	control	N2	wt	16.906	15.969	5.22413	5.3376	0.113466	1	0.29777	1.58938	0.0337869
0000001_17.tif	control	N2	wt	17.432	15.646	5.22413	5.44014	0.216003	1	0.29777	1.61991	0.0643192
0000001_17.tif	control	N2	wt	18.854	14.786	5.22413	6.03963	0.815497	1	0.29777	1.79842	0.242831
0000001_17.tif	control	N2	wt	19.068	14.854	5.22413	6.25905	1.03491	1	0.29777	1.86376	0.308166
0000001_17.tif	control	N2	wt	17.422	18.37	5.22413	7.62479	2.40066	1	0.29777	2.27044	0.714845
0000002_13.tif	control	LX703	dop3	5.547	13.13	5.32294	8.00817	2.68523	1	0.29777	2.38459	0.79958
0000002_13.tif	control	LX703	dop3	5.661	13.182	5.32294	7.91614	2.5932	1	0.29777	2.35719	0.772176
0000002_13.tif	control	LX703	dop3	5.854	13.188	5.32294	7.73534	2.41239	1	0.29777	2.30335	0.718338
0000002_13.tif	control	LX703	dop3	5.958	13.964	5.32294	7.92716	2.60422	1	0.29777	2.36047	0.775458
0000002_13.tif	control	LX703	dop3	6.307	13.969	5.32294	7.61333	2.29039	1	0.29777	2.26702	0.682009
0000002_13.tif	control	LX703	dop3	8.526	17.349	5.32294	8.1356	2.81266	1	0.29777	2.42254	0.837525
0000002_13.tif	control	LX703	dop3	8.771	17.224	5.32294	7.89424	2.5713	1	0.29777	2.35067	0.765656
0000002_13.tif	control	LX703	dop3	7.891	15.802	5.32294	7.36236	2.03942	1	0.29777	2.19229	0.607278
0000002_13.tif	control	LX703	dop3	7.974	15.76	5.32294	7.27364	1.9507	1	0.29777	2.16587	0.58086
0000002_13.tif	control	LX703	dop3	8.036	15.76	5.32294	7.22951	1.90657	1	0.29777	2.15273	0.567718
0000002_13.tif	control	LX703	dop3	8.016	15.88	5.32294	7.32859	2.00564	1	0.29777	2.18223	0.59722
0000002_13.tif	control	LX703	dop3	7.573	15.193	5.32294	7.19566	1.87272	1	0.29777	2.14265	0.557639
0000002_13.tif	control	LX703	dop3	8.391	15.198	5.32294	6.58332	1.26038	1	0.29777	1.96032	0.375303
0000002_13.tif	control	LX703	dop3	8.547	16.318	5.32294	7.29919	1.97625	1	0.29777	2.17348	0.588468
0000002_13.tif	control	LX703	dop3	9.115	16.615	5.32294	7.19704	1.8741	1	0.29777	2.14306	0.55805
0000002_13.tif	control	LX703	dop3	9.005	16.51	5.32294	7.17376	1.85082	1	0.29777	2.13613	0.551119
0000002_13.tif	control	LX703	dop3	9.078	16.479	5.32294	7.10628	1.78334	1	0.29777	2.11604	0.531025
0000002_13.tif	control	LX703	dop3	9.365	16.495	5.32294	6.9585	1.63556	1	0.29777	2.07203	0.487021
0000002_13.tif	control	LX703	dop3	9.479	16.526	5.32294	6.92309	1.60015	1	0.29777	2.06149	0.476477
0000002_13.tif	control	LX703	dop3	9.5	16.427	5.32294	6.82821	1.50527	1	0.29777	2.03324	0.448224
0000002_13.tif	control	LX703	dop3	9.609	16.583	5.32294	6.90351	1.58057	1	0.29777	2.05566	0.470645
0000002_13.tif	control	LX703	dop3	9.531	16.693	5.32294	7.03798	1.71504	1	0.29777	2.0957	0.510687
0000002_13.tif	control	LX703	dop3	9.568	16.188	5.32294	6.59047	1.26752	1	0.29777	1.96244	0.37743
0000002_13.tif	control	LX703	dop3	7.505	13.333	5.32294	6.25826	0.935316	1	0.29777	1.86352	0.278509
0000002_13.tif	control	LX703	dop3	7.76	13.229	5.32294	5.98327	0.660325	1	0.29777	1.78164	0.196625
0000002_13.tif	control	LX703	dop3	9.089	13.177	5.32294	4.78855	-0.534395	0	0.29777	1.42589	-0.159127
0000002_13.tif	control	LX703	dop3	9.438	13.021	5.32294	4.40985	-0.913095	0	0.29777	1.31312	-0.271892
0000002_13.tif	control	LX703	dop3	9.104	9.542	5.32294	4.21587	-1.10707	0	0.29777	1.25536	-0.329652
0000002_13.tif	control	LX703	dop3	9.177	9.516	5.32294	4.1527	-1.17024	0	0.29777	1.23655	-0.348464
0000002_13.tif	control	LX703	dop3	9.344	8.359	5.32294	4.46567	-0.857274	0	0.29777	1.32974	-0.255271
0000002_13.tif	control	LX703	dop3	10.248	7.474	5.32294	4.32618	-0.996765	0	0.29777	1.28821	-0.296807
0000002_13.tif	control	LX703	dop3	10.533	7.439	5.32294	4.16629	-1.15666	0	0.29777	1.2406	-0.344418
0000002_13.tif	control	LX703	dop3	10.571	8.717	5.32294	3.2468	-2.07614	0	0.29777	0.9668	-0.618213
0000002_13.tif	control	LX703	dop3	12.474	9.106	5.32294	1.70791	-3.61503	0	0.29777	0.508566	-1.07645
0000002_13.tif	control	LX703	dop3	10.04	10.04	5.32294	3.18924	-2.1337	0	0.29777	0.94966	-0.635352
0000002_13.tif	control	LX703	dop3	10.13	9.995	5.32294	3.11046	-2.21248	0	0.29777	0.926201	-0.658811
0000002_13.tif	control	LX703	dop3	10.158	10.068	5.32294	3.06804	-2.2549	0	0.29777	0.913571	-0.671442
0000002_13.tif	control	LX703	dop3	10.523	10.46	5.32294	2.65209	-2.67085	0	0.29777	0.789713	-0.7953
0000002_13.tif	control	LX703	dop3	10.898	10.217	5.32294	2.31319	-3.00975	0	0.29777	0.688799	-0.896213
0000002_13.tif	control	LX703	dop3	11.012	9.974	5.32294	2.26369	-3.05926	0	0.29777	0.674058	-0.910955
0000002_13.tif	control	LX703	dop3	11.7	10.082	5.32294	1.57934	-3.7436	0	0.29777	0.47028	-1.11473
0000002_13.tif	control	LX703	dop3	11.967	10.071	5.32294	1.33986	-3.98309	0	0.29777	0.398969	-1.18604
0000002_13.tif	control	LX703	dop3	11.953	10.349	5.32294	1.25496	-4.06798	0	0.29777	0.373689	-1.21132
0000002_13.tif	control	LX703	dop3	10.207	10.866	5.32294	2.96668	-2.35626	0	0.29777	0.883389	-0.701624
0000002_13.tif	control	LX703	dop3	10.863	11.804	5.32294	2.56928	-2.75367	0	0.29777	0.765054	-0.819959
0000002_13.tif	control	LX703	dop3	11.22	11.759	5.32294	2.23232	-3.09062	0	0.29777	0.664719	-0.920293
0000002_13.tif	control	LX703	dop3	11.314	11.891	5.32294	2.22076	-3.10218	0	0.29777	0.661276	-0.923736
0000002_13.tif	control	LX703	dop3	11.373	11.356	5.32294	1.92176	-3.40118	0	0.29777	0.572242	-1.01277
0000002_13.tif	control	LX703	dop3	12.026	11.276	5.32294	1.29335	-4.02959	0	0.29777	0.385122	-1.19989
0000002_13.tif	control	LX703	dop3	11.116	12.252	5.32294	2.59207	-2.73087	0	0.29777	0.771841	-0.813172
0000002_13.tif	control	LX703	dop3	11.602	12.22	5.32294	2.20478	-3.11817	0	0.29777	0.656516	-0.928497
0000002_13.tif	control	LX703	dop3	11.606	12.391	5.32294	2.3257	-2.99724	0	0.29777	0.692525	-0.892488
0000002_13.tif	control	LX703	dop3	10.644	12.425	5.32294	3.07508	-2.24787	0	0.29777	0.915665	-0.669347
0000002_13.tif	control	LX703	dop3	12.55	12.464	5.32294	1.89997	-3.42297	0	0.29777	0.565755	-1.01926
0000002_13.tif	control	LX703	dop3	11.99	13.417	5.32294	2.99129	-2.33165	0	0.29777	0.890717	-0.694296
0000002_13.tif	control	LX703	dop3	12.073	13.51	5.32294	3.04622	-2.27672	0	0.29777	0.907074	-0.677938
0000002_13.tif	control	LX703	dop3	11.833	14.812	5.32294	4.35437	-0.968568	0	0.29777	1.2966	-0.28841
0000002_13.tif	control	LX703	dop3	11.969	14.516	5.32294	4.03113	-1.29181	0	0.29777	1.20035	-0.384663
0000002_13.tif	control	LX703	dop3	12.427	14.797	5.32294	4.19577	-1.12717	0	0.29777	1.24937	-0.335638
0000002_13.tif	control	LX703	dop3	12.505	14.792	5.32294	4.17778	-1.14516	0	0.29777	1.24402	-0.340994
0000002_13.tif	control	LX703	dop3	12.938	14.385	5.32294	3.72505	-1.5979	0	0.29777	1.10921	-0.475806
0000002_13.tif	control	LX703	dop3	13.047	14.5	5.32294	3.83488	-1.48806	0	0.29777	1.14191	-0.443101
0000002_13.tif	control	LX703	dop3	13.182	14.255	5.32294	3.58803	-1.73491	0	0.29777	1.06841	-0.516605
0000002_13.tif	control	LX703	dop3	12.37	15.589	5.32294	4.98611	-0.336833	0	0.29777	1.48471	-0.100299
0000002_13.tif	control	LX703	dop3	12.302	15.641	5.32294	5.04865	-0.274289	0	0.29777	1.50334	-0.0816751
0000002_13.tif	control	LX703	dop3	11.047	15.516	5.32294	5.29218	-0.0307596	0	0.29777	1.57585	-0.00915928
0000002_13.tif	control	LX703	dop3	10.958	15.656	5.32294	5.45617	0.133228	1	0.29777	1.62468	0.0396714
0000002_13.tif	control	LX703	dop3	10.943	15.943	5.32294	5.72559	0.402645	1	0.29777	1.70491	0.119896
0000002_13.tif	control	LX703	dop3	10.214	15.953	5.32294	6.05492	0.731973	1	0.29777	1.80297	0.21796
0000002_13.tif	control	LX703	dop3	10.135	16.057	5.32294	6.18426	0.861322	1	0.29777	1.84149	0.256476
0000002_13.tif	control	LX703	dop3	10.224	17.87	5.32294	7.78103	2.45809	1	0.29777	2.31696	0.731945
0000002_13.tif	control	LX703	dop3	10.333	17.896	5.32294	7.76466	2.44172	1	0.29777	2.31208	0.727071
0000002_13.tif	control	LX703	dop3	11.87	17.974	5.32294	7.42122	2.09827	1	0.29777	2.20982	0.624803
0000002_13.tif	control	LX703	dop3	12.062	17.932	5.32294	7.34855	2.02561	1	0.29777	2.18818	0.603166
0000002_13.tif	control	LX703	dop3	11.375	19.807	5.32294	9.31401	3.99107	1	0.29777	2.77343	1.18842
0000002_13.tif	control	LX703	dop3	11.531	19.885	5.32294	9.36205	4.03911	1	0.29777	2.78774	1.20273
0000002_13.tif	control	LX703	dop3	12.073	20.516	5.32294	9.90957	4.58663	1	0.29777	2.95077	1.36576
0000002_13.tif	control	LX703	dop3	14.021	21.161	5.32294	10.5287	5.20575	1	0.29777	3.13513	1.55012
0000002_13.tif	control	LX703	dop3	14.073	20.443	5.32294	9.81789	4.49495	1	0.29777	2.92347	1.33846
0000002_13.tif	control	LX703	dop3	14.609	20.557	5.32294	9.99457	4.67163	1	0.29777	2.97608	1.39107
0000002_13.tif	control	LX703	dop3	14.677	20.203	5.32294	9.65481	4.33187	1	0.29777	2.87491	1.2899
0000002_13.tif	control	LX703	dop3	14.807	20.224	5.32294	9.69669	4.37375	1	0.29777	2.88738	1.30237
0000002_13.tif	control	LX703	dop3	14.948	20.224	5.32294	9.72153	4.39859	1	0.29777	2.89478	1.30977
0000002_13.tif	control	LX703	dop3	15.568	18.88	5.32294	8.55676	3.23382	1	0.29777	2.54795	0.962934
0000002_13.tif	control	LX703	dop3	15.271	18.26	5.32294	7.87912	2.55617	1	0.29777	2.34616	0.761152
0000002_13.tif	control	LX703	dop3	15.245	18.182	5.32294	7.79701	2.47406	1	0.29777	2.32171	0.736702
0000002_13.tif	control	LX703	dop3	14.995	17.078	5.32294	6.66652	1.34358	1	0.29777	1.98509	0.400077
0000002_13.tif	control	LX703	dop3	14.901	17.073	5.32294	6.63653	1.31359	1	0.29777	1.97616	0.391148
0000002_13.tif	control	LX703	dop3	13.635	16.406	5.32294	5.75805	0.435108	1	0.29777	1.71457	0.129562
0000002_13.tif	control	LX703	dop3	13.839	16.464	5.32294	5.83582	0.512877	1	0.29777	1.73773	0.152719
0000002_13.tif	control	LX703	dop3	14.245	15.922	5.32294	5.36443	0.0414874	1	0.29777	1.59737	0.0123537
0000002_13.tif	control	LX703	dop3	14.599	15.667	5.32294	5.20102	-0.121921	0	0.29777	1.54871	-0.0363045
0000002_13.tif	control	LX703	dop3	14.302	15.38	5.32294	4.84774	-0.475201	0	0.29777	1.44351	-0.141501
0000002_13.tif	control	LX703	dop3	14.302	15.203	5.32294	4.67584	-0.647098	0	0.29777	1.39233	-0.192686
0000002_13.tif	control	LX703	dop3	14.078	14.339	5.32294	3.78332	-1.53962	0	0.29777	1.12656	-0.458454
0000002_13.tif	control	LX703	dop3	14.057	13.495	5.32294	2.96474	-2.3582	0	0.29777	0.882811	-0.702202
0000002_13.tif	control	LX703	dop3	13.859	13.224	5.32294	2.64898	-2.67396	0	0.29777	0.788788	-0.796225
0000002_13.tif	control	LX703	dop3	16.214	13.729	5.32294	4.31973	-1.00321	0	0.29777	1.28629	-0.298727
0000002_13.tif	control	LX703	dop3	12.953	12.552	5.32294	1.89711	-3.42583	0	0.29777	0.564902	-1.02011
0000002_13.tif	control	LX703	dop3	13.099	11.422	5.32294	0.758056	-4.56489	0	0.29777	0.225726	-1.35929
0000002_13.tif	control	LX703	dop3	13.375	11.286	5.32294	0.653012	-4.66993	0	0.29777	0.194447	-1.39057
0000002_13.tif	control	LX703	dop3	13.354	12.078	5.32294	1.42334	-3.8996	0	0.29777	0.423827	-1.16119
0000002_13.tif	control	LX703	dop3	13.521	11.906	5.32294	1.28858	-4.03436	0	0.29777	0.3837	-1.20131
0000002_13.tif	control	LX703	dop3	14.776	12.005	5.32294	2.09264	-3.23031	0	0.29777	0.623124	-0.961888
0000002_13.tif	control	LX703	dop3	14.781	11.714	5.32294	1.92385	-3.39909	0	0.29777	0.572865	-1.01215
0000002_13.tif	control	LX703	dop3	14.75	11.396	5.32294	1.74279	-3.58015	0	0.29777	0.518952	-1.06606
0000002_13.tif	control	LX703	dop3	15.349	11.062	5.32294	2.21746	-3.10548	0	0.29777	0.660294	-0.924718
0000002_13.tif	control	LX703	dop3	16.062	10.573	5.32294	2.89653	-2.42642	0	0.29777	0.862498	-0.722514
0000002_13.tif	control	LX703	dop3	14.151	10.922	5.32294	1.0165	-4.30644	0	0.29777	0.302684	-1.28233
0000002_13.tif	control	LX703	dop3	13.703	10.828	5.32294	0.559658	-4.76328	0	0.29777	0.166649	-1.41836
0000002_13.tif	control	LX703	dop3	13.547	10.771	5.32294	0.393975	-4.92897	0	0.29777	0.117314	-1.4677
0000002_13.tif	control	LX703	dop3	12.703	10.729	5.32294	0.468124	-4.85482	0	0.29777	0.139393	-1.44562
0000002_13.tif	control	LX703	dop3	12.724	10.318	5.32294	0.563959	-4.75898	0	0.29777	0.16793	-1.41708
0000002_13.tif	control	LX703	dop3	12.615	9.328	5.32294	1.44832	-3.87462	0	0.29777	0.431266	-1.15375
0000002_13.tif	control	LX703	dop3	12.724	9.078	5.32294	1.6496	-3.67335	0	0.29777	0.4912	-1.09381
0000002_13.tif	control	LX703	dop3	14.656	9.536	5.32294	1.86983	-3.45311	0	0.29777	0.556781	-1.02823
0000002_13.tif	control	LX703	dop3	14.88	8.724	5.32294	2.59029	-2.73265	0	0.29777	0.771312	-0.813701
0000002_13.tif	control	LX703	dop3	13.182	8.38	5.32294	2.28705	-3.03589	0	0.29777	0.681015	-0.903998
0000002_13.tif	control	LX703	dop3	13.057	7.661	5.32294	3.00801	-2.31493	0	0.29777	0.895696	-0.689317
0000002_13.tif	control	LX703	dop3	13.036	7.573	5.32294	3.09677	-2.22617	0	0.29777	0.922126	-0.662887
0000002_13.tif	control	LX703	dop3	13.172	7.583	5.32294	3.084	-2.23894	0	0.29777	0.918324	-0.666689
0000002_13.tif	control	LX703	dop3	15.089	8.167	5.32294	3.15342	-2.16952	0	0.29777	0.938995	-0.646018
0000002_13.tif	control	LX703	dop3	15.182	7.932	5.32294	3.39712	-1.92582	0	0.29777	1.01156	-0.573451
0000002_13.tif	control	LX703	dop3	15.474	7.958	5.32294	3.55822	-1.76472	0	0.29777	1.05953	-0.525481
0000002_13.tif	control	LX703	dop3	15.521	7.807	5.32294	3.70418	-1.61877	0	0.29777	1.10299	-0.48202
0000002_13.tif	control	LX703	dop3	15.078	6.984	5.32294	4.14927	-1.17368	0	0.29777	1.23553	-0.349486
0000002_13.tif	control	LX703	dop3	13.682	6.76	5.32294	3.9408	-1.38215	0	0.29777	1.17345	-0.411562
0000002_13.tif	control	LX703	dop3	13.651	6.828	5.32294	3.86939	-1.45355	0	0.29777	1.15219	-0.432824
0000002_13.tif	control	LX703	dop3	12.646	6.927	5.32294	3.77611	-1.54683	0	0.29777	1.12441	-0.460599
0000002_13.tif	control	LX703	dop3	16.859	9.094	5.32294	4.01313	-1.30982	0	0.29777	1.19499	-0.390024
0000002_13.tif	control	LX703	dop3	17.401	9.849	5.32294	4.31229	-1.01065	0	0.29777	1.28407	-0.300941
0000002_13.tif	control	LX703	dop3	18.214	10.089	5.32294	5.07999	-0.242953	0	0.29777	1.51267	-0.0723442
0000002_13.tif	control	LX703	dop3	18.234	10.177	5.32294	5.09064	-0.232305	0	0.29777	1.51584	-0.0691735
0000002_13.tif	control	LX703	dop3	18.396	10.312	5.32294	5.24104	-0.0819059	0	0.29777	1.56062	-0.0243891
0000002_13.tif	control	LX703	dop3	18.047	10.755	5.32294	4.88079	-0.442149	0	0.29777	1.45335	-0.131659
0000002_13.tif	control	LX703	dop3	18.922	11.682	5.32294	5.84382	0.520879	1	0.29777	1.74011	0.155102
0000002_13.tif	control	LX703	dop3	16.661	13.917	5.32294	4.77185	-0.551094	0	0.29777	1.42091	-0.164099
0000002_13.tif	control	LX703	dop3	16.385	14.927	5.32294	5.33883	0.0158891	1	0.29777	1.58974	0.0047313
0000002_13.tif	control	LX703	dop3	19.01	12.875	5.32294	6.24627	0.923329	1	0.29777	1.85995	0.27494
0000002_15.tif	predator	LX703	dop3	4.385	7.135	5.72404	9.03975	3.31571	1	0.29777	2.69177	0.987319
0000002_15.tif	predator	LX703	dop3	4.401	7.099	5.72404	9.03787	3.31384	1	0.29777	2.69121	0.986761
0000002_15.tif	predator	LX703	dop3	4.505	7.099	5.72404	8.9411	3.21706	1	0.29777	2.66239	0.957944
0000002_15.tif	predator	LX703	dop3	4.797	8.314	5.72404	8.28555	2.56152	1	0.29777	2.46719	0.762742
0000002_15.tif	predator	LX703	dop3	4.915	8.363	5.72404	8.15906	2.43502	1	0.29777	2.42952	0.725076
0000002_15.tif	predator	LX703	dop3	7.866	9.766	5.72404	4.99129	-0.732751	0	0.29777	1.48626	-0.218191
0000002_15.tif	predator	LX703	dop3	8.109	9.71	5.72404	4.75799	-0.966049	0	0.29777	1.41679	-0.28766
0000002_15.tif	predator	LX703	dop3	8.214	9.863	5.72404	4.63418	-1.08986	0	0.29777	1.37992	-0.324527
0000002_15.tif	predator	LX703	dop3	9.193	7.356	5.72404	4.72777	-0.996262	0	0.29777	1.40779	-0.296657
0000002_15.tif	predator	LX703	dop3	9.866	6.738	5.72404	4.69667	-1.02737	0	0.29777	1.39853	-0.305919
0000002_15.tif	predator	LX703	dop3	9.908	6.606	5.72404	4.77434	-0.949696	0	0.29777	1.42166	-0.282791
0000002_15.tif	predator	LX703	dop3	11.714	9.453	5.72404	1.44868	-4.27536	0	0.29777	0.431372	-1.27307
0000002_15.tif	predator	LX703	dop3	12.207	9.911	5.72404	0.776995	-4.94704	0	0.29777	0.231366	-1.47308
0000002_15.tif	predator	LX703	dop3	11.512	11.203	5.72404	1.53785	-4.18619	0	0.29777	0.457925	-1.24652
0000002_15.tif	predator	LX703	dop3	11.401	11.307	5.72404	1.68729	-4.03675	0	0.29777	0.502424	-1.20202
0000002_15.tif	predator	LX703	dop3	4.099	14.293	5.72404	9.55231	3.82827	1	0.29777	2.84439	1.13994
0000002_15.tif	predator	LX703	dop3	4.03	14.905	5.72404	9.87953	4.1555	1	0.29777	2.94183	1.23738
0000002_15.tif	predator	LX703	dop3	5.238	14.807	5.72404	8.77254	3.0485	1	0.29777	2.6122	0.907753
0000002_15.tif	predator	LX703	dop3	5.557	14.856	5.72404	8.52399	2.79995	1	0.29777	2.53819	0.833741
0000002_15.tif	predator	LX703	dop3	5.773	14.78	5.72404	8.30032	2.57629	1	0.29777	2.47159	0.767141
0000002_15.tif	predator	LX703	dop3	5.863	15.002	5.72404	8.34466	2.62062	1	0.29777	2.48479	0.780343
0000002_15.tif	predator	LX703	dop3	5.578	15.557	5.72404	8.89411	3.17007	1	0.29777	2.6484	0.943952
0000002_15.tif	predator	LX703	dop3	5.682	16.293	5.72404	9.26046	3.53642	1	0.29777	2.75749	1.05304
0000002_15.tif	predator	LX703	dop3	6.467	17.373	5.72404	9.43841	3.71437	1	0.29777	2.81047	1.10603
0000002_15.tif	predator	LX703	dop3	6.62	17.345	5.72404	9.31522	3.59118	1	0.29777	2.77379	1.06935
0000002_15.tif	predator	LX703	dop3	6.592	18.564	5.72404	10.2743	4.55025	1	0.29777	3.05937	1.35493
0000002_15.tif	predator	LX703	dop3	6.877	18.342	5.72404	9.92542	4.20138	1	0.29777	2.95549	1.25104
0000002_15.tif	predator	LX703	dop3	6.898	18.418	5.72404	9.97392	4.24989	1	0.29777	2.96993	1.26549
0000002_15.tif	predator	LX703	dop3	6.967	18.474	5.72404	9.97843	4.25439	1	0.29777	2.97128	1.26683
0000002_15.tif	predator	LX703	dop3	7.057	18.807	5.72404	10.1989	4.47489	1	0.29777	3.03694	1.33249
0000002_15.tif	predator	LX703	dop3	8.134	20.092	5.72404	10.7726	5.04858	1	0.29777	3.20776	1.50332
0000002_15.tif	predator	LX703	dop3	8.307	20.016	5.72404	10.6297	4.90563	1	0.29777	3.16519	1.46075
0000002_15.tif	predator	LX703	dop3	10.394	18.623	5.72404	8.58147	2.85743	1	0.29777	2.5553	0.850858
0000002_15.tif	predator	LX703	dop3	11.991	17.797	5.72404	7.45203	1.72799	1	0.29777	2.21899	0.514545
0000002_15.tif	predator	LX703	dop3	12.075	17.818	5.72404	7.46407	1.74004	1	0.29777	2.22258	0.518131
0000002_15.tif	predator	LX703	dop3	10.998	15.797	5.72404	5.70414	-0.0198943	0	0.29777	1.69852	-0.00592392
0000002_15.tif	predator	LX703	dop3	11.22	15.95	5.72404	5.78412	0.0600872	1	0.29777	1.72234	0.0178922
0000002_15.tif	predator	LX703	dop3	11.484	15.776	5.72404	5.54777	-0.176264	0	0.29777	1.65196	-0.052486
0000002_15.tif	predator	LX703	dop3	14.602	17.658	5.72404	7.48278	1.75874	1	0.29777	2.22815	0.5237
0000002_15.tif	predator	LX703	dop3	16.075	17.318	5.72404	7.6545	1.93046	1	0.29777	2.27928	0.574834
0000002_15.tif	predator	LX703	dop3	16.304	18.977	5.72404	9.26669	3.54266	1	0.29777	2.75934	1.0549
0000002_15.tif	predator	LX703	dop3	17.332	17.477	5.72404	8.40164	2.67761	1	0.29777	2.50176	0.797311
0000002_15.tif	predator	LX703	dop3	17.387	17.255	5.72404	8.24562	2.52158	1	0.29777	2.4553	0.750852
0000002_15.tif	predator	LX703	dop3	11.339	12.641	5.72404	2.69257	-3.03146	0	0.29777	0.801767	-0.902679
0000002_15.tif	predator	LX703	dop3	11.436	12.634	5.72404	2.63457	-3.08946	0	0.29777	0.784497	-0.91995
0000002_15.tif	predator	LX703	dop3	12.637	11.092	5.72404	0.72399	-5.00005	0	0.29777	0.215583	-1.48886
0000002_15.tif	predator	LX703	dop3	13.616	11.8	5.72404	1.61929	-4.10475	0	0.29777	0.482175	-1.22227
0000002_15.tif	predator	LX703	dop3	13.554	12.036	5.72404	1.80214	-3.92189	0	0.29777	0.536624	-1.16782
0000002_15.tif	predator	LX703	dop3	13.526	12.182	5.72404	1.92586	-3.79817	0	0.29777	0.573464	-1.13098
0000002_15.tif	predator	LX703	dop3	14.255	12.384	5.72404	2.45703	-3.267	0	0.29777	0.731631	-0.972815
0000002_15.tif	predator	LX703	dop3	13.776	13.224	5.72404	2.99059	-2.73344	0	0.29777	0.890509	-0.813937
0000002_15.tif	predator	LX703	dop3	14.214	13.856	5.72404	3.73564	-1.98839	0	0.29777	1.11236	-0.592083
0000002_15.tif	predator	LX703	dop3	13.797	11.238	5.72404	1.29455	-4.42949	0	0.29777	0.385477	-1.31897
0000002_15.tif	predator	LX703	dop3	14.089	11.092	5.72404	1.4515	-4.27254	0	0.29777	0.432212	-1.27223
0000002_15.tif	predator	LX703	dop3	14.158	11.071	5.72404	1.50266	-4.22137	0	0.29777	0.447448	-1.257
0000002_15.tif	predator	LX703	dop3	14.97	11.293	5.72404	2.33339	-3.39065	0	0.29777	0.694813	-1.00963
0000002_15.tif	predator	LX703	dop3	15.033	11.273	5.72404	2.38415	-3.33989	0	0.29777	0.709927	-0.994519
0000002_15.tif	predator	LX703	dop3	15.158	11.148	5.72404	2.4594	-3.26464	0	0.29777	0.732336	-0.972111
0000002_15.tif	predator	LX703	dop3	15.075	11.057	5.72404	2.35321	-3.37082	0	0.29777	0.700716	-1.00373
0000002_15.tif	predator	LX703	dop3	15.151	11.016	5.72404	2.41527	-3.30877	0	0.29777	0.719194	-0.985252
0000002_15.tif	predator	LX703	dop3	15.172	11.057	5.72404	2.4464	-3.27764	0	0.29777	0.728464	-0.975982
0000002_15.tif	predator	LX703	dop3	15.179	10.453	5.72404	2.36181	-3.36222	0	0.29777	0.703277	-1.00117
0000002_15.tif	predator	LX703	dop3	17.019	11.335	5.72404	4.30576	-1.41828	0	0.29777	1.28213	-0.422321
0000002_15.tif	predator	LX703	dop3	17.102	11.46	5.72404	4.41536	-1.30867	0	0.29777	1.31476	-0.389684
0000002_15.tif	predator	LX703	dop3	17.484	10.641	5.72404	4.67269	-1.05134	0	0.29777	1.39139	-0.313059
0000002_15.tif	predator	LX703	dop3	17.082	10.057	5.72404	4.27706	-1.44698	0	0.29777	1.27358	-0.430866
0000002_15.tif	predator	LX703	dop3	17.227	9.641	5.72404	4.47234	-1.2517	0	0.29777	1.33173	-0.372719
0000002_15.tif	predator	LX703	dop3	17.227	9.467	5.72404	4.50478	-1.21925	0	0.29777	1.34139	-0.363057
0000002_15.tif	predator	LX703	dop3	17.151	9.411	5.72404	4.44244	-1.28159	0	0.29777	1.32283	-0.38162
0000002_15.tif	predator	LX703	dop3	15.665	8.12	5.72404	3.64182	-2.08222	0	0.29777	1.08442	-0.620022
0000002_15.tif	predator	LX703	dop3	15.595	8.759	5.72404	3.22105	-2.50299	0	0.29777	0.959132	-0.745315
0000002_15.tif	predator	LX703	dop3	17.005	9.085	5.72404	4.38596	-1.33808	0	0.29777	1.30601	-0.39844
0000002_15.tif	predator	LX703	dop3	17.45	9.266	5.72404	4.76666	-0.957376	0	0.29777	1.41937	-0.285078
0000002_15.tif	predator	LX703	dop3	17.359	9.113	5.72404	4.71741	-1.00663	0	0.29777	1.4047	-0.299743
0000002_15.tif	predator	LX703	dop3	14.783	5.62	5.72404	5.15981	-0.564224	0	0.29777	1.53644	-0.168009
0000002_15.tif	predator	LX703	dop3	15.29	5.398	5.72404	5.57143	-0.152606	0	0.29777	1.659	-0.0454416
0000002_15.tif	predator	LX703	dop3	16.866	4.568	5.72404	7.0918	1.36776	1	0.29777	2.11173	0.407279
0000002_15.tif	predator	LX703	dop3	17.005	4.109	5.72404	7.54947	1.82543	1	0.29777	2.24801	0.543559
0000002_15.tif	predator	LX703	dop3	17.547	3.887	5.72404	8.04148	2.31745	1	0.29777	2.39451	0.690066
0000002_15.tif	predator	LX703	dop3	17.95	3.991	5.72404	8.2035	2.47946	1	0.29777	2.44276	0.73831
0000002_15.tif	predator	LX703	dop3	14.005	2.606	5.72404	7.87497	2.15094	1	0.29777	2.34493	0.640484
0000002_15.tif	predator	LX703	dop3	13.394	2.717	5.72404	7.69559	1.97155	1	0.29777	2.29151	0.587069
0000002_15.tif	predator	LX703	dop3	13.38	2.495	5.72404	7.91597	2.19194	1	0.29777	2.35714	0.652694
0000002_15.tif	predator	LX703	dop3	12.582	2.641	5.72404	7.75359	2.02956	1	0.29777	2.30879	0.604341
0000002_15.tif	predator	LX703	dop3	13.345	2.023	5.72404	8.38458	2.66054	1	0.29777	2.49668	0.79223
0000002_15.tif	predator	LX703	dop3	13.762	2.099	5.72404	8.34556	2.62153	1	0.29777	2.48506	0.780612
0000002_15.tif	predator	LX703	dop3	15.672	2.648	5.72404	8.25223	2.5282	1	0.29777	2.45727	0.752821
0000002_15.tif	predator	LX703	dop3	18.769	4.161	5.72404	8.61553	2.89149	1	0.29777	2.56545	0.860999
0000002_15.tif	predator	LX703	dop3	18.811	4.217	5.72404	8.60432	2.88028	1	0.29777	2.56211	0.857662
0000002_15.tif	predator	LX703	dop3	19.776	6.214	5.72404	8.11548	2.39145	1	0.29777	2.41655	0.712102
0000002_15.tif	predator	LX703	dop3	19.623	6.707	5.72404	7.73821	2.01417	1	0.29777	2.30421	0.59976
0000002_15.tif	predator	LX703	dop3	19.818	6.665	5.72404	7.92988	2.20585	1	0.29777	2.36128	0.656836
0000002_15.tif	predator	LX703	dop3	19.887	6.859	5.72404	7.90226	2.17823	1	0.29777	2.35306	0.648611
0000002_15.tif	predator	LX703	dop3	19.547	13.161	5.72404	7.27684	1.5528	1	0.29777	2.16682	0.462377
0000002_15.tif	predator	LX703	dop3	21.38	12.932	5.72404	8.9311	3.20706	1	0.29777	2.65941	0.954967
0000002_15.tif	predator	LX703	dop3	20.207	14.651	5.72404	8.52906	2.80503	1	0.29777	2.5397	0.835253
0000002_15.tif	predator	LX703	dop3	20.443	15.061	5.72404	8.94145	3.21741	1	0.29777	2.6625	0.958049
0000002_15.tif	predator	LX703	dop3	19.401	14.832	5.72404	7.94093	2.21689	1	0.29777	2.36457	0.660124
0000002_15.tif	predator	LX703	dop3	19.873	16.575	5.72404	9.38162	3.65759	1	0.29777	2.79357	1.08912
0000002_15.tif	predator	LX703	dop3	19.901	16.845	5.72404	9.58243	3.8584	1	0.29777	2.85336	1.14891
0000002_15.tif	predator	LX703	dop3	19.207	17.464	5.72404	9.53135	3.80731	1	0.29777	2.83815	1.1337
0000002_15.tif	predator	LX703	dop3	18.922	17.665	5.72404	9.49578	3.77175	1	0.29777	2.82756	1.12311
0000002_15.tif	predator	LX703	dop3	18.859	17.804	5.72404	9.56275	3.83872	1	0.29777	2.8475	1.14305
0000004_18.tif	control	N2	wt	6.062	7.406	5.20851	8.12687	2.91836	1	0.29777	2.41994	0.868999
0000004_18.tif	control	N2	wt	7.083	9.677	5.20851	6.47552	1.26701	1	0.29777	1.92821	0.377276
0000004_18.tif	control	N2	wt	6.828	9.786	5.20851	6.7106	1.50209	1	0.29777	1.99822	0.447277
0000004_18.tif	control	N2	wt	8.672	14.391	5.20851	6.0223	0.813787	1	0.29777	1.79326	0.242321
0000004_18.tif	control	N2	wt	8.714	14.094	5.20851	5.81312	0.604608	1	0.29777	1.73097	0.180034
0000004_18.tif	control	N2	wt	7.276	13.766	5.20851	6.88836	1.67985	1	0.29777	2.05115	0.500208
0000004_18.tif	control	N2	wt	7.443	13.214	5.20851	6.5103	1.30179	1	0.29777	1.93857	0.387633
0000004_18.tif	control	N2	wt	9.214	13.26	5.20851	4.94015	-0.268358	0	0.29777	1.47103	-0.0799088
0000004_18.tif	control	N2	wt	9.49	12.974	5.20851	4.55836	-0.650155	0	0.29777	1.35734	-0.193597
0000004_18.tif	control	N2	wt	9.292	12.776	5.20851	4.64241	-0.566098	0	0.29777	1.38237	-0.168567
0000004_18.tif	control	N2	wt	8.63	12.307	5.20851	5.08332	-0.125189	0	0.29777	1.51366	-0.0372776
0000004_18.tif	control	N2	wt	8.776	12.214	5.20851	4.91605	-0.292462	0	0.29777	1.46385	-0.0870865
0000004_18.tif	control	N2	wt	9.26	12.115	5.20851	4.42481	-0.783706	0	0.29777	1.31757	-0.233364
0000004_18.tif	control	N2	wt	9.188	11.708	5.20851	4.38688	-0.821631	0	0.29777	1.30628	-0.244657
0000004_18.tif	control	N2	wt	8.245	11.453	5.20851	5.27109	0.0625776	1	0.29777	1.56957	0.0186337
0000004_18.tif	control	N2	wt	8.245	11.219	5.20851	5.24501	0.0364987	1	0.29777	1.56181	0.0108682
0000004_18.tif	control	N2	wt	8.656	10.792	5.20851	4.81318	-0.395329	0	0.29777	1.43322	-0.117717
0000004_18.tif	control	N2	wt	9.146	10.802	5.20851	4.32331	-0.885199	0	0.29777	1.28735	-0.263586
0000004_18.tif	control	N2	wt	9.531	10.177	5.20851	3.97947	-1.22904	0	0.29777	1.18497	-0.365972
0000004_18.tif	control	N2	wt	9.589	9.927	5.20851	3.96632	-1.24219	0	0.29777	1.18105	-0.369886
0000004_18.tif	control	N2	wt	9.214	9.021	5.20851	4.59287	-0.615641	0	0.29777	1.36762	-0.183319
0000004_18.tif	control	N2	wt	9.161	8.896	5.20851	4.69001	-0.518503	0	0.29777	1.39654	-0.154395
0000004_18.tif	control	N2	wt	9	8.88	5.20851	4.84447	-0.364045	0	0.29777	1.44254	-0.108402
0000004_18.tif	control	N2	wt	8.714	8.688	5.20851	5.18284	-0.0256682	0	0.29777	1.5433	-0.00764323
0000004_18.tif	control	N2	wt	8.484	8.245	5.20851	5.579	0.370489	1	0.29777	1.66126	0.11032
0000004_18.tif	control	N2	wt	9.552	8.755	5.20851	4.39578	-0.812728	0	0.29777	1.30893	-0.242006
0000004_18.tif	control	N2	wt	9.609	8.036	5.20851	4.71862	-0.48989	0	0.29777	1.40506	-0.145874
0000004_18.tif	control	N2	wt	9.161	7.776	5.20851	5.23484	0.0263271	1	0.29777	1.55878	0.00783943
0000004_18.tif	control	N2	wt	8.573	7.401	5.20851	5.93183	0.723319	1	0.29777	1.76632	0.215383
0000004_18.tif	control	N2	wt	8.005	7.51	5.20851	6.35239	1.14388	1	0.29777	1.89155	0.340613
0000004_18.tif	control	N2	wt	8.005	7.339	5.20851	6.44129	1.23278	1	0.29777	1.91802	0.367084
0000004_18.tif	control	N2	wt	8.417	7.021	5.20851	6.27918	1.07067	1	0.29777	1.86975	0.318814
0000004_18.tif	control	N2	wt	8.448	6.656	5.20851	6.47852	1.27001	1	0.29777	1.92911	0.378172
0000004_18.tif	control	N2	wt	13.188	5.99	5.20851	4.76829	-0.440225	0	0.29777	1.41985	-0.131086
0000004_18.tif	control	N2	wt	11.979	6.656	5.20851	4.35671	-0.8518	0	0.29777	1.2973	-0.253641
0000004_18.tif	control	N2	wt	11.911	7.161	5.20851	3.91258	-1.29593	0	0.29777	1.16505	-0.38589
0000004_18.tif	control	N2	wt	9.667	7.729	5.20851	4.85609	-0.352418	0	0.29777	1.446	-0.10494
0000004_18.tif	control	N2	wt	10.01	7.688	5.20851	4.61958	-0.588931	0	0.29777	1.37557	-0.175366
0000004_18.tif	control	N2	wt	9.896	7.885	5.20851	4.5798	-0.628713	0	0.29777	1.36373	-0.187212
0000004_18.tif	control	N2	wt	9.849	8.182	5.20851	4.43836	-0.770154	0	0.29777	1.32161	-0.229329
0000004_18.tif	control	N2	wt	10.094	8.38	5.20851	4.12402	-1.08449	0	0.29777	1.22801	-0.32293
0000004_18.tif	control	N2	wt	10.177	8.453	5.20851	4.01416	-1.19435	0	0.29777	1.1953	-0.355642
0000004_18.tif	control	N2	wt	10.234	8.151	5.20851	4.1497	-1.05881	0	0.29777	1.23566	-0.315282
0000004_18.tif	control	N2	wt	10.474	8.25	5.20851	3.90129	-1.30723	0	0.29777	1.16169	-0.389253
0000004_18.tif	control	N2	wt	10.151	9.099	5.20851	3.70607	-1.50245	0	0.29777	1.10356	-0.447383
0000004_18.tif	control	N2	wt	10.385	8.984	5.20851	3.55384	-1.65467	0	0.29777	1.05823	-0.49271
0000004_18.tif	control	N2	wt	10.708	9.036	5.20851	3.24976	-1.95876	0	0.29777	0.96768	-0.583259
0000004_18.tif	control	N2	wt	10.526	9.411	5.20851	3.23329	-1.97522	0	0.29777	0.962777	-0.588162
0000004_18.tif	control	N2	wt	10.776	9.396	5.20851	3.01423	-2.19428	0	0.29777	0.897546	-0.653392
0000004_18.tif	control	N2	wt	11.906	10.13	5.20851	1.68148	-3.52703	0	0.29777	0.500694	-1.05024
0000004_18.tif	control	N2	wt	11.958	10.094	5.20851	1.64726	-3.56125	0	0.29777	0.490504	-1.06043
0000004_18.tif	control	N2	wt	12.208	9.974	5.20851	1.48064	-3.72787	0	0.29777	0.44089	-1.11005
0000004_18.tif	control	N2	wt	12.302	10.021	5.20851	1.37598	-3.83253	0	0.29777	0.409727	-1.14121
0000004_18.tif	control	N2	wt	12.911	9.234	5.20851	1.61543	-3.59308	0	0.29777	0.481027	-1.06991
0000004_18.tif	control	N2	wt	13.167	10.062	5.20851	0.751364	-4.45715	0	0.29777	0.223734	-1.3272
0000004_18.tif	control	N2	wt	13.229	10.109	5.20851	0.684457	-4.52406	0	0.29777	0.203811	-1.34713
0000004_18.tif	control	N2	wt	12.5	10.417	5.20851	1.02462	-4.18389	0	0.29777	0.305102	-1.24584
0000004_18.tif	control	N2	wt	12.156	10.568	5.20851	1.32555	-3.88296	0	0.29777	0.39471	-1.15623
0000004_18.tif	control	N2	wt	11.37	10.932	5.20851	2.10688	-3.10164	0	0.29777	0.627364	-0.923574
0000004_18.tif	control	N2	wt	10.229	11.156	5.20851	3.26534	-1.94317	0	0.29777	0.97232	-0.578619
0000004_18.tif	control	N2	wt	10.453	11.266	5.20851	3.05982	-2.14869	0	0.29777	0.911123	-0.639815
0000004_18.tif	control	N2	wt	10.505	11.333	5.20851	3.02079	-2.18772	0	0.29777	0.899501	-0.651437
0000004_18.tif	control	N2	wt	10.13	11.615	5.20851	3.44922	-1.75929	0	0.29777	1.02708	-0.523863
0000004_18.tif	control	N2	wt	10.948	11.229	5.20851	2.5661	-2.64241	0	0.29777	0.764108	-0.78683
0000004_18.tif	control	N2	wt	11.771	11.089	5.20851	1.73151	-3.477	0	0.29777	0.515592	-1.03535
0000004_18.tif	control	N2	wt	11.849	10.964	5.20851	1.63407	-3.57444	0	0.29777	0.486578	-1.06436
0000004_18.tif	control	N2	wt	11.286	11.797	5.20851	2.42109	-2.78742	0	0.29777	0.720929	-0.830009
0000004_18.tif	control	N2	wt	12.026	11.625	5.20851	1.68756	-3.52095	0	0.29777	0.502506	-1.04843
0000004_18.tif	control	N2	wt	12.12	11.38	5.20851	1.48886	-3.71965	0	0.29777	0.443338	-1.1076
0000004_18.tif	control	N2	wt	12.875	11.693	5.20851	1.11449	-4.09402	0	0.29777	0.331861	-1.21908
0000004_18.tif	control	N2	wt	12.901	11.536	5.20851	0.969753	-4.23876	0	0.29777	0.288763	-1.26218
0000004_18.tif	control	N2	wt	13.214	11.266	5.20851	0.57557	-4.63294	0	0.29777	0.171388	-1.37955
0000004_18.tif	control	N2	wt	13.224	11.193	5.20851	0.506235	-4.70228	0	0.29777	0.150742	-1.4002
0000004_18.tif	control	N2	wt	12.526	11.974	5.20851	1.54513	-3.66338	0	0.29777	0.460093	-1.09085
0000004_18.tif	control	N2	wt	12.396	12.005	5.20851	1.65117	-3.55734	0	0.29777	0.491668	-1.05927
0000004_18.tif	control	N2	wt	12.427	12.12	5.20851	1.72124	-3.48727	0	0.29777	0.512533	-1.03841
0000004_18.tif	control	N2	wt	11.891	12.224	5.20851	2.15934	-3.04917	0	0.29777	0.642987	-0.907951
0000004_18.tif	control	N2	wt	12.474	12.323	5.20851	1.86128	-3.34723	0	0.29777	0.554233	-0.996706
0000004_18.tif	control	N2	wt	13.292	13.255	5.20851	2.51125	-2.69727	0	0.29777	0.747774	-0.803165
0000004_18.tif	control	N2	wt	13.391	13.198	5.20851	2.44924	-2.75927	0	0.29777	0.729311	-0.821628
0000004_18.tif	control	N2	wt	10.495	13.661	5.20851	4.16156	-1.04695	0	0.29777	1.23919	-0.31175
0000004_18.tif	control	N2	wt	10.766	13.547	5.20851	3.88966	-1.31886	0	0.29777	1.15822	-0.392716
0000004_18.tif	control	N2	wt	10.922	13.901	5.20851	4.05167	-1.15684	0	0.29777	1.20647	-0.344474
0000004_18.tif	control	N2	wt	11.104	13.896	5.20851	3.9358	-1.27271	0	0.29777	1.17196	-0.378975
0000004_18.tif	control	N2	wt	11.354	13.766	5.20851	3.68368	-1.52483	0	0.29777	1.09689	-0.45405
0000004_18.tif	control	N2	wt	11.417	13.87	5.20851	3.73431	-1.4742	0	0.29777	1.11197	-0.438972
0000004_18.tif	control	N2	wt	11.526	13.578	5.20851	3.43116	-1.77736	0	0.29777	1.0217	-0.529243
0000004_18.tif	control	N2	wt	12.536	13.552	5.20851	2.95325	-2.25526	0	0.29777	0.87939	-0.671549
0000004_18.tif	control	N2	wt	12.594	13.635	5.20851	3.01477	-2.19374	0	0.29777	0.897709	-0.65323
0000004_18.tif	control	N2	wt	12.984	14.365	5.20851	3.64739	-1.56112	0	0.29777	1.08608	-0.464855
0000004_18.tif	control	N2	wt	11.906	14.672	5.20851	4.22197	-0.986539	0	0.29777	1.25718	-0.293762
0000004_18.tif	control	N2	wt	11.349	15.062	5.20851	4.80497	-0.403541	0	0.29777	1.43078	-0.120162
0000004_18.tif	control	N2	wt	11.25	15.146	5.20851	4.9243	-0.284207	0	0.29777	1.46631	-0.0846284
0000004_18.tif	control	N2	wt	11.521	15.104	5.20851	4.76991	-0.438604	0	0.29777	1.42034	-0.130603
0000004_18.tif	control	N2	wt	14.016	16.411	5.20851	5.68737	0.478854	1	0.29777	1.69353	0.142588
0000004_18.tif	control	N2	wt	13.99	16.24	5.20851	5.51467	0.306154	1	0.29777	1.6421	0.0911635
0000004_18.tif	control	N2	wt	14.349	15.849	5.20851	5.17438	-0.0341327	0	0.29777	1.54077	-0.0101637
0000004_18.tif	control	N2	wt	13.849	15.682	5.20851	4.94662	-0.261895	0	0.29777	1.47295	-0.0779843
0000004_18.tif	control	N2	wt	15.188	15.339	5.20851	4.9004	-0.308116	0	0.29777	1.45919	-0.0917477
0000004_18.tif	control	N2	wt	13.984	14.948	5.20851	4.22947	-0.97904	0	0.29777	1.25941	-0.291529
0000004_18.tif	control	N2	wt	13.922	14.318	5.20851	3.59664	-1.61187	0	0.29777	1.07097	-0.479967
0000004_18.tif	control	N2	wt	13.714	14.057	5.20851	3.31606	-1.89245	0	0.29777	0.987424	-0.563515
0000004_18.tif	control	N2	wt	13.734	14	5.20851	3.26079	-1.94773	0	0.29777	0.970964	-0.579974
0000004_18.tif	control	N2	wt	14.219	14.047	5.20851	3.38123	-1.82728	0	0.29777	1.00683	-0.54411
0000004_18.tif	control	N2	wt	14.219	13.917	5.20851	3.2546	-1.95392	0	0.29777	0.969121	-0.581818
0000004_18.tif	control	N2	wt	15.547	14.193	5.20851	4.02148	-1.18703	0	0.29777	1.19748	-0.353461
0000004_18.tif	control	N2	wt	15.573	13.964	5.20851	3.84143	-1.36708	0	0.29777	1.14386	-0.407075
0000004_18.tif	control	N2	wt	14.026	13.198	5.20851	2.51057	-2.69794	0	0.29777	0.747572	-0.803367
0000004_18.tif	control	N2	wt	13.87	13.026	5.20851	2.31106	-2.89746	0	0.29777	0.688163	-0.862776
0000004_18.tif	control	N2	wt	13.453	13.182	5.20851	2.43205	-2.77646	0	0.29777	0.724192	-0.826746
0000004_18.tif	control	N2	wt	14.578	13.25	5.20851	2.73494	-2.47357	0	0.29777	0.814382	-0.736556
0000004_18.tif	control	N2	wt	14.552	13.016	5.20851	2.5115	-2.69701	0	0.29777	0.74785	-0.803088
0000004_18.tif	control	N2	wt	14.448	13.021	5.20851	2.47303	-2.73548	0	0.29777	0.736394	-0.814544
0000004_18.tif	control	N2	wt	13.63	12.302	5.20851	1.56033	-3.64818	0	0.29777	0.464619	-1.08632
0000004_18.tif	control	N2	wt	13.505	12.042	5.20851	1.2925	-3.91601	0	0.29777	0.384868	-1.16607
0000004_18.tif	control	N2	wt	13.458	11.917	5.20851	1.16705	-4.04146	0	0.29777	0.347513	-1.20343
0000004_18.tif	control	N2	wt	13.557	11.87	5.20851	1.12345	-4.08506	0	0.29777	0.33453	-1.21641
0000004_18.tif	control	N2	wt	13.792	11.583	5.20851	0.89343	-4.31508	0	0.29777	0.266037	-1.2849
0000004_18.tif	control	N2	wt	13.854	11.474	5.20851	0.820001	-4.38851	0	0.29777	0.244172	-1.30677
0000004_18.tif	control	N2	wt	14.005	11.427	5.20851	0.863496	-4.34502	0	0.29777	0.257123	-1.29382
0000004_18.tif	control	N2	wt	14.042	11.573	5.20851	1.00283	-4.20569	0	0.29777	0.298611	-1.25233
0000004_18.tif	control	N2	wt	14.062	11.76	5.20851	1.17122	-4.0373	0	0.29777	0.348753	-1.20219
0000004_18.tif	control	N2	wt	14.031	11.854	5.20851	1.23881	-3.9697	0	0.29777	0.368882	-1.18206
0000004_18.tif	control	N2	wt	14.469	11.474	5.20851	1.23458	-3.97394	0	0.29777	0.367619	-1.18332
0000004_18.tif	control	N2	wt	14.349	11.286	5.20851	1.03039	-4.17813	0	0.29777	0.306818	-1.24412
0000004_18.tif	control	N2	wt	15.266	12.464	5.20851	2.48335	-2.72517	0	0.29777	0.739466	-0.811473
0000004_18.tif	control	N2	wt	16.167	12.667	5.20851	3.3097	-1.89882	0	0.29777	0.985528	-0.56541
0000004_18.tif	control	N2	wt	16.193	12	5.20851	2.99711	-2.2114	0	0.29777	0.89245	-0.658489
0000004_18.tif	control	N2	wt	16.083	11.87	5.20851	2.84383	-2.36468	0	0.29777	0.846809	-0.70413
0000004_18.tif	control	N2	wt	16.182	11.688	5.20851	2.87058	-2.33793	0	0.29777	0.854772	-0.696167
0000004_18.tif	control	N2	wt	16.036	11.594	5.20851	2.70219	-2.50632	0	0.29777	0.804631	-0.746308
0000004_18.tif	control	N2	wt	15.99	11.458	5.20851	2.61853	-2.58998	0	0.29777	0.77972	-0.771219
0000004_18.tif	control	N2	wt	16.203	11.312	5.20851	2.79116	-2.41735	0	0.29777	0.831125	-0.719814
0000004_18.tif	control	N2	wt	15.286	11.807	5.20851	2.10208	-3.10643	0	0.29777	0.625936	-0.925002
0000004_18.tif	control	N2	wt	15.469	11.661	5.20851	2.19771	-3.0108	0	0.29777	0.654412	-0.896527
0000004_18.tif	control	N2	wt	15.49	11.594	5.20851	2.19015	-3.01836	0	0.29777	0.652162	-0.898776
0000004_18.tif	control	N2	wt	15.401	11.51	5.20851	2.07611	-3.1324	0	0.29777	0.618203	-0.932736
0000004_18.tif	control	N2	wt	15.464	11.458	5.20851	2.11691	-3.09161	0	0.29777	0.630351	-0.920588
0000004_18.tif	control	N2	wt	15.672	11.193	5.20851	2.2471	-2.96141	0	0.29777	0.669119	-0.88182
0000004_18.tif	control	N2	wt	15.656	11.073	5.20851	2.21072	-2.99779	0	0.29777	0.658287	-0.892651
0000004_18.tif	control	N2	wt	15.807	10.865	5.20851	2.34083	-2.86769	0	0.29777	0.697028	-0.853911
0000004_18.tif	control	N2	wt	15.984	10.781	5.20851	2.51519	-2.69332	0	0.29777	0.748948	-0.80199
0000004_18.tif	control	N2	wt	16.208	10.833	5.20851	2.74026	-2.46825	0	0.29777	0.815966	-0.734972
0000004_18.tif	control	N2	wt	16.297	10.766	5.20851	2.82805	-2.38047	0	0.29777	0.842107	-0.708832
0000004_18.tif	control	N2	wt	15.078	11.094	5.20851	1.64536	-3.56315	0	0.29777	0.48994	-1.061
0000004_18.tif	control	N2	wt	14.995	10.854	5.20851	1.52954	-3.67897	0	0.29777	0.455451	-1.09549
0000004_18.tif	control	N2	wt	13.911	10.964	5.20851	0.49108	-4.71743	0	0.29777	0.146229	-1.40471
0000004_18.tif	control	N2	wt	14.016	10.802	5.20851	0.549466	-4.65905	0	0.29777	0.163615	-1.38732
0000004_18.tif	control	N2	wt	14.135	10.833	5.20851	0.671152	-4.53736	0	0.29777	0.199849	-1.35109
0000004_18.tif	control	N2	wt	14.297	10.589	5.20851	0.843508	-4.365	0	0.29777	0.251171	-1.29977
0000004_18.tif	control	N2	wt	14.401	10.438	5.20851	0.982837	-4.22568	0	0.29777	0.292659	-1.25828
0000004_18.tif	control	N2	wt	14.708	10.505	5.20851	1.26299	-3.94552	0	0.29777	0.376081	-1.17486
0000004_18.tif	control	N2	wt	15.005	10.542	5.20851	1.55002	-3.65849	0	0.29777	0.461549	-1.08939
0000004_18.tif	control	N2	wt	14.172	10.151	5.20851	0.923585	-4.28493	0	0.29777	0.275016	-1.27592
0000004_18.tif	control	N2	wt	14.219	10.078	5.20851	1.00702	-4.20149	0	0.29777	0.29986	-1.25108
0000004_18.tif	control	N2	wt	14.031	9.849	5.20851	1.06191	-4.14661	0	0.29777	0.316204	-1.23473
0000004_18.tif	control	N2	wt	14.49	9.974	5.20851	1.28243	-3.92609	0	0.29777	0.381868	-1.16907
0000004_18.tif	control	N2	wt	14.995	10.094	5.20851	1.66103	-3.54748	0	0.29777	0.494604	-1.05633
0000004_18.tif	control	N2	wt	15.198	10.036	5.20851	1.87062	-3.33789	0	0.29777	0.557016	-0.993923
0000004_18.tif	control	N2	wt	14.042	9.073	5.20851	1.77219	-3.43632	0	0.29777	0.527705	-1.02323
0000004_18.tif	control	N2	wt	14.161	8.74	5.20851	2.12579	-3.08273	0	0.29777	0.632995	-0.917943
0000004_18.tif	control	N2	wt	14.276	9.266	5.20851	1.68923	-3.51928	0	0.29777	0.503003	-1.04794
0000004_18.tif	control	N2	wt	14.458	9.005	5.20851	2.00578	-3.20273	0	0.29777	0.597261	-0.953678
0000004_18.tif	control	N2	wt	14.422	8.464	5.20851	2.47669	-2.73182	0	0.29777	0.737485	-0.813454
0000004_18.tif	control	N2	wt	15.188	8.781	5.20851	2.61379	-2.59472	0	0.29777	0.77831	-0.772629
0000004_18.tif	control	N2	wt	15.641	9.594	5.20851	2.46047	-2.74804	0	0.29777	0.732655	-0.818284
0000004_18.tif	control	N2	wt	15.672	9.156	5.20851	2.7192	-2.48931	0	0.29777	0.809696	-0.741243
0000004_18.tif	control	N2	wt	16.193	9.193	5.20851	3.13758	-2.07093	0	0.29777	0.934278	-0.616661
0000004_18.tif	control	N2	wt	15.76	8.37	5.20851	3.3035	-1.90502	0	0.29777	0.983682	-0.567257
0000004_18.tif	control	N2	wt	13.453	8.208	5.20851	2.54205	-2.66646	0	0.29777	0.756946	-0.793992
0000004_18.tif	control	N2	wt	13.552	7.875	5.20851	2.8762	-2.33231	0	0.29777	0.856445	-0.694493
0000004_18.tif	control	N2	wt	13.604	7.797	5.20851	2.95608	-2.25243	0	0.29777	0.880233	-0.670705
0000004_18.tif	control	N2	wt	14.188	7.911	5.20851	2.92863	-2.27988	0	0.29777	0.872059	-0.67888
0000004_18.tif	control	N2	wt	14.078	7.333	5.20851	3.47085	-1.73767	0	0.29777	1.03351	-0.517425
0000004_18.tif	control	N2	wt	14.901	5.875	5.20851	5.08097	-0.127543	0	0.29777	1.51296	-0.0379784
0000004_18.tif	control	N2	wt	15.255	5.37	5.20851	5.6687	0.460191	1	0.29777	1.68797	0.137031
0000004_18.tif	control	N2	wt	17.422	7.453	5.20851	5.14747	-0.0610448	0	0.29777	1.53276	-0.0181773
0000004_18.tif	control	N2	wt	18.083	8.396	5.20851	5.1798	-0.0287135	0	0.29777	1.54239	-0.00855002
0000004_18.tif	control	N2	wt	17.531	9.833	5.20851	4.16422	-1.04429	0	0.29777	1.23998	-0.310959
0000004_18.tif	control	N2	wt	16.594	9.776	5.20851	3.27327	-1.93524	0	0.29777	0.974682	-0.576257
0000004_18.tif	control	N2	wt	16.453	9.781	5.20851	3.13739	-2.07112	0	0.29777	0.934221	-0.616718
0000004_18.tif	control	N2	wt	17.979	9.849	5.20851	4.59912	-0.609392	0	0.29777	1.36948	-0.181459
0000004_18.tif	control	N2	wt	18.49	10.255	5.20851	5.04534	-0.163171	0	0.29777	1.50235	-0.0485874
0000004_18.tif	control	N2	wt	17.286	11.661	5.20851	3.92421	-1.2843	0	0.29777	1.16851	-0.382427
0000004_18.tif	control	N2	wt	16.729	12.448	5.20851	3.6757	-1.53281	0	0.29777	1.09451	-0.456424
0000004_18.tif	control	N2	wt	16.833	12.474	5.20851	3.78004	-1.42848	0	0.29777	1.12558	-0.425357
0000004_18.tif	control	N2	wt	17.818	13.031	5.20851	4.91088	-0.29763	0	0.29777	1.46231	-0.0886253
0000004_18.tif	control	N2	wt	17.875	13.229	5.20851	5.05552	-0.152992	0	0.29777	1.50538	-0.0455566
0000004_18.tif	control	N2	wt	17.755	13.771	5.20851	5.24369	0.0351735	1	0.29777	1.56141	0.0104736
0000004_18.tif	control	N2	wt	17.474	14.484	5.20851	5.47565	0.267142	1	0.29777	1.63049	0.0795467
0000004_18.tif	control	N2	wt	17.526	14.734	5.20851	5.68608	0.477568	1	0.29777	1.69314	0.142205
0000004_18.tif	control	N2	wt	17.49	14.927	5.20851	5.79791	0.589399	1	0.29777	1.72644	0.175505
0000004_18.tif	control	N2	wt	17.391	15.089	5.20851	5.84885	0.640335	1	0.29777	1.74161	0.190672
0000004_18.tif	control	N2	wt	17.292	15.047	5.20851	5.75148	0.542969	1	0.29777	1.71262	0.16168
0000004_18.tif	control	N2	wt	19.49	14.37	5.20851	7.02544	1.81693	1	0.29777	2.09197	0.541027
0000004_18.tif	control	N2	wt	19.516	14.255	5.20851	6.98937	1.78085	1	0.29777	2.08122	0.530285
0000004_18.tif	control	N2	wt	17.281	16.099	5.20851	6.56834	1.35983	1	0.29777	1.95586	0.404917
00000005_4.tif	predator	CF2805	dop1234	3.865	9.25	5.52615	10.0501	4.52392	1	0.29777	2.99261	1.34709
00000005_4.tif	predator	CF2805	dop1234	3.641	9.911	5.52615	10.1936	4.66747	1	0.29777	3.03536	1.38983
00000005_4.tif	predator	CF2805	dop1234	5.443	10.583	5.52615	8.35647	2.83032	1	0.29777	2.4883	0.842783
00000005_4.tif	predator	CF2805	dop1234	4.417	15.203	5.52615	10.3679	4.8418	1	0.29777	3.08726	1.44174
00000005_4.tif	predator	CF2805	dop1234	9.807	14.531	5.52615	5.47221	-0.0539359	0	0.29777	1.62946	-0.0160605
00000005_4.tif	predator	CF2805	dop1234	6.87	12.714	5.52615	7.19031	1.66416	1	0.29777	2.14106	0.495536
00000005_4.tif	predator	CF2805	dop1234	9.646	13.297	5.52615	4.85138	-0.674766	0	0.29777	1.4446	-0.200925
00000005_4.tif	predator	CF2805	dop1234	10.5	12.505	5.52615	3.71822	-1.80793	0	0.29777	1.10717	-0.538347
00000005_4.tif	predator	CF2805	dop1234	10.495	12.234	5.52615	3.60554	-1.92061	0	0.29777	1.07362	-0.5719
00000005_4.tif	predator	CF2805	dop1234	10.599	12.177	5.52615	3.48742	-2.03873	0	0.29777	1.03845	-0.607073
00000005_4.tif	predator	CF2805	dop1234	9.615	11.552	5.52615	4.25157	-1.27458	0	0.29777	1.26599	-0.379531
00000005_4.tif	predator	CF2805	dop1234	9.917	10.26	5.52615	3.91549	-1.61066	0	0.29777	1.16592	-0.479606
00000005_4.tif	predator	CF2805	dop1234	10.51	9.807	5.52615	3.4297	-2.09645	0	0.29777	1.02126	-0.624261
00000005_4.tif	predator	CF2805	dop1234	10.297	9.188	5.52615	3.84755	-1.6786	0	0.29777	1.14568	-0.499838
00000005_4.tif	predator	CF2805	dop1234	9.557	8.682	5.52615	4.73333	-0.79282	0	0.29777	1.40944	-0.236078
00000005_4.tif	predator	CF2805	dop1234	9.286	8.177	5.52615	5.21114	-0.315008	0	0.29777	1.55172	-0.0937999
00000005_4.tif	predator	CF2805	dop1234	9.604	5.646	5.52615	6.63331	1.10716	1	0.29777	1.9752	0.32968
00000005_4.tif	predator	CF2805	dop1234	13.01	2.302	5.52615	8.52042	2.99427	1	0.29777	2.53713	0.891605
00000005_4.tif	predator	CF2805	dop1234	12.828	3.115	5.52615	7.73196	2.20581	1	0.29777	2.30235	0.656824
00000005_4.tif	predator	CF2805	dop1234	12.354	5.891	5.52615	5.10326	-0.422889	0	0.29777	1.5196	-0.125924
00000005_4.tif	predator	CF2805	dop1234	13.922	6.667	5.52615	4.1209	-1.40525	0	0.29777	1.22708	-0.418442
00000005_4.tif	predator	CF2805	dop1234	14.146	6.823	5.52615	3.97834	-1.54781	0	0.29777	1.18463	-0.460892
00000005_4.tif	predator	CF2805	dop1234	14.068	7.099	5.52615	3.69695	-1.8292	0	0.29777	1.10084	-0.544682
00000005_4.tif	predator	CF2805	dop1234	14.224	7.542	5.52615	3.27198	-2.25417	0	0.29777	0.974298	-0.671224
00000005_4.tif	predator	CF2805	dop1234	12.766	8.979	5.52615	2.08044	-3.44571	0	0.29777	0.619491	-1.02603
00000005_4.tif	predator	CF2805	dop1234	12.625	9.026	5.52615	2.11452	-3.41163	0	0.29777	0.62964	-1.01588
00000005_4.tif	predator	CF2805	dop1234	12.302	9.323	5.52615	2.09174	-3.43441	0	0.29777	0.622859	-1.02266
00000005_4.tif	predator	CF2805	dop1234	12	9.432	5.52615	2.25001	-3.27614	0	0.29777	0.669984	-0.975537
00000005_4.tif	predator	CF2805	dop1234	11.562	13.193	5.52615	3.28464	-2.24151	0	0.29777	0.978068	-0.667454
00000005_4.tif	predator	CF2805	dop1234	12.385	13.604	5.52615	3.15196	-2.37419	0	0.29777	0.93856	-0.706962
00000005_4.tif	predator	CF2805	dop1234	12.51	13.578	5.52615	3.07435	-2.4518	0	0.29777	0.915449	-0.730072
00000005_4.tif	predator	CF2805	dop1234	12.234	13.286	5.52615	2.94838	-2.57777	0	0.29777	0.87794	-0.767581
00000005_4.tif	predator	CF2805	dop1234	12.141	14.005	5.52615	3.61999	-1.90616	0	0.29777	1.07792	-0.567598
00000005_4.tif	predator	CF2805	dop1234	13.599	13.25	5.52615	2.47194	-3.05421	0	0.29777	0.73607	-0.909451
00000005_4.tif	predator	CF2805	dop1234	14.115	13.104	5.52615	2.33971	-3.18644	0	0.29777	0.696696	-0.948826
00000005_4.tif	predator	CF2805	dop1234	14.031	12.943	5.52615	2.16966	-3.35649	0	0.29777	0.646058	-0.999463
00000005_4.tif	predator	CF2805	dop1234	14.115	12.76	5.52615	1.99945	-3.5267	0	0.29777	0.595376	-1.05015
00000005_4.tif	predator	CF2805	dop1234	13.068	15.729	5.52615	4.99647	-0.529682	0	0.29777	1.4878	-0.157723
00000005_4.tif	predator	CF2805	dop1234	16.641	20.099	5.52615	9.73757	4.21142	1	0.29777	2.89956	1.25404
00000005_4.tif	predator	CF2805	dop1234	16.156	20.026	5.52615	9.53638	4.01023	1	0.29777	2.83965	1.19413
00000005_4.tif	predator	CF2805	dop1234	16.01	20.438	5.52615	9.90245	4.3763	1	0.29777	2.94865	1.30313
00000005_4.tif	predator	CF2805	dop1234	16.276	19.203	5.52615	8.77447	3.24832	1	0.29777	2.61277	0.967252
00000005_4.tif	predator	CF2805	dop1234	16.198	19.052	5.52615	8.60765	3.0815	1	0.29777	2.5631	0.917577
00000005_4.tif	predator	CF2805	dop1234	16.281	16.495	5.52615	6.22599	0.699839	1	0.29777	1.85391	0.208391
00000005_4.tif	predator	CF2805	dop1234	16.38	16.448	5.52615	6.22335	0.697204	1	0.29777	1.85313	0.207606
00000005_4.tif	predator	CF2805	dop1234	16.016	16.323	5.52615	5.96509	0.438943	1	0.29777	1.77623	0.130704
00000005_4.tif	predator	CF2805	dop1234	14.865	15.505	5.52615	4.83835	-0.687805	0	0.29777	1.44071	-0.204808
00000005_4.tif	predator	CF2805	dop1234	15.01	12.453	5.52615	2.06162	-3.46453	0	0.29777	0.613887	-1.03163
00000005_4.tif	predator	CF2805	dop1234	15.021	12.339	5.52615	1.97737	-3.54878	0	0.29777	0.588801	-1.05672
00000005_4.tif	predator	CF2805	dop1234	15.177	11.224	5.52615	1.44784	-4.07831	0	0.29777	0.431124	-1.2144
00000005_4.tif	predator	CF2805	dop1234	15.203	11.12	5.52615	1.44513	-4.08102	0	0.29777	0.430315	-1.21521
00000005_4.tif	predator	CF2805	dop1234	15.312	11.094	5.52615	1.54599	-3.98016	0	0.29777	0.46035	-1.18517
00000005_4.tif	predator	CF2805	dop1234	15.562	11.016	5.52615	1.77992	-3.74623	0	0.29777	0.530008	-1.11551
00000005_4.tif	predator	CF2805	dop1234	14.307	10.474	5.52615	0.597866	-4.92828	0	0.29777	0.178027	-1.4675
00000005_4.tif	predator	CF2805	dop1234	14.24	10.385	5.52615	0.597537	-4.92861	0	0.29777	0.177928	-1.46759
00000005_4.tif	predator	CF2805	dop1234	15.438	9.193	5.52615	2.28704	-3.23911	0	0.29777	0.68101	-0.964511
00000005_4.tif	predator	CF2805	dop1234	16.37	9.568	5.52615	2.84673	-2.67942	0	0.29777	0.84767	-0.797852
00000005_4.tif	predator	CF2805	dop1234	16.479	9.505	5.52615	2.97222	-2.55393	0	0.29777	0.885038	-0.760484
00000005_4.tif	predator	CF2805	dop1234	16.568	7.365	5.52615	4.40246	-1.12369	0	0.29777	1.31092	-0.3346
00000005_4.tif	predator	CF2805	dop1234	16.599	4.5	5.52615	6.88222	1.35607	1	0.29777	2.04932	0.403798
00000005_4.tif	predator	CF2805	dop1234	16.526	4.359	5.52615	6.98239	1.45624	1	0.29777	2.07915	0.433625
00000005_4.tif	predator	CF2805	dop1234	14.484	2.901	5.52615	7.91487	2.38872	1	0.29777	2.35681	0.71129
00000005_4.tif	predator	CF2805	dop1234	14.625	3.083	5.52615	7.74737	2.22122	1	0.29777	2.30694	0.661414
00000005_4.tif	predator	CF2805	dop1234	15.297	2.516	5.52615	8.40493	2.87878	1	0.29777	2.50274	0.857215
00000005_4.tif	predator	CF2805	dop1234	17.083	3.495	5.52615	7.99728	2.47113	1	0.29777	2.38135	0.735828
00000005_4.tif	predator	CF2805	dop1234	17.13	6.802	5.52615	5.19434	-0.331812	0	0.29777	1.54672	-0.0988037
00000005_4.tif	predator	CF2805	dop1234	16.792	6.74	5.52615	5.0339	-0.492251	0	0.29777	1.49894	-0.146577
00000005_4.tif	predator	CF2805	dop1234	17.109	10.036	5.52615	3.39586	-2.13029	0	0.29777	1.01118	-0.634337
00000005_4.tif	predator	CF2805	dop1234	17.38	10.151	5.52615	3.63883	-1.88732	0	0.29777	1.08354	-0.561986
00000005_4.tif	predator	CF2805	dop1234	19.115	10.625	5.52615	5.32044	-0.205713	0	0.29777	1.58427	-0.0612553
00000005_4.tif	predator	CF2805	dop1234	19.016	10.802	5.52615	5.21902	-0.307125	0	0.29777	1.55407	-0.0914527
00000005_4.tif	predator	CF2805	dop1234	18.714	10.75	5.52615	4.91713	-0.609018	0	0.29777	1.46417	-0.181347
00000005_4.tif	predator	CF2805	dop1234	18.271	10.745	5.52615	4.47419	-1.05196	0	0.29777	1.33228	-0.313243
00000005_4.tif	predator	CF2805	dop1234	18.057	10.802	5.52615	4.26003	-1.26612	0	0.29777	1.26851	-0.377012
00000005_4.tif	predator	CF2805	dop1234	17.885	10.802	5.52615	4.08803	-1.43812	0	0.29777	1.21729	-0.428229
00000005_4.tif	predator	CF2805	dop1234	18.469	11.281	5.52615	4.69815	-0.828	0	0.29777	1.39897	-0.246554
00000005_4.tif	predator	CF2805	dop1234	19.083	11.641	5.52615	5.3547	-0.171449	0	0.29777	1.59447	-0.0510524
00000005_4.tif	predator	CF2805	dop1234	19.125	12.531	5.52615	5.60648	0.0803293	1	0.29777	1.66944	0.0239197
00000005_4.tif	predator	CF2805	dop1234	18.943	12.604	5.52615	5.4577	-0.0684544	0	0.29777	1.62514	-0.0203837
00000005_4.tif	predator	CF2805	dop1234	17.141	14.172	5.52615	4.75892	-0.767229	0	0.29777	1.41706	-0.228458
00000005_4.tif	predator	CF2805	dop1234	17.656	20.458	5.52615	10.4134	4.88728	1	0.29777	3.10081	1.45528
00000005_4.tif	predator	CF2805	dop1234	17.385	19.885	5.52615	9.78088	4.25473	1	0.29777	2.91245	1.26693
00000005_4.tif	predator	CF2805	dop1234	20.146	15.833	5.52615	8.11061	2.58446	1	0.29777	2.4151	0.769575
00000005_4.tif	predator	CF2805	dop1234	21.411	15.839	5.52615	9.13815	3.612	1	0.29777	2.72107	1.07555
00000005_4.tif	predator	CF2805	dop1234	21.516	15.849	5.52615	9.2313	3.70515	1	0.29777	2.7488	1.10328
00000005_4.tif	predator	CF2805	dop1234	20.99	15.276	5.52615	8.47935	2.9532	1	0.29777	2.5249	0.879374
00000005_4.tif	predator	CF2805	dop1234	20.688	15.234	5.52615	8.20186	2.67571	1	0.29777	2.44227	0.796748
00000005_4.tif	predator	CF2805	dop1234	21.099	14.516	5.52615	8.19952	2.67337	1	0.29777	2.44157	0.796049
00000005_4.tif	predator	CF2805	dop1234	20.979	14.406	5.52615	8.04273	2.51658	1	0.29777	2.39488	0.749362
00000005_4.tif	predator	CF2805	dop1234	19.646	14.51	5.52615	6.9339	1.40775	1	0.29777	2.06471	0.419186
00000005_4.tif	predator	CF2805	dop1234	22.005	15.156	5.52615	9.29883	3.77268	1	0.29777	2.76891	1.12339
00000005_4.tif	predator	CF2805	dop1234	22.094	14.865	5.52615	9.24546	3.71931	1	0.29777	2.75302	1.1075
00000005_4.tif	predator	CF2805	dop1234	21.385	7.068	5.52615	8.44993	2.92378	1	0.29777	2.51613	0.870613
00000005_4.tif	predator	CF2805	dop1234	20.365	5.161	5.52615	8.6475	3.12135	1	0.29777	2.57497	0.929444
00000005_4.tif	predator	CF2805	dop1234	20.021	4.693	5.52615	8.70993	3.18378	1	0.29777	2.59355	0.948033
00000005_4.tif	predator	CF2805	dop1234	22.682	13.969	5.52615	9.43794	3.91179	1	0.29777	2.81034	1.16481
00000005_4.tif	predator	CF2805	dop1234	22.74	14.125	5.52615	9.546	4.01985	1	0.29777	2.84251	1.19699
00000008_6.tif	control	LX645	dop1	9.167	12.906	4.89045	5.63119	0.740735	1	0.29777	1.6768	0.220569
00000008_6.tif	control	LX645	dop1	9.099	12.734	4.89045	5.61363	0.723172	1	0.29777	1.67157	0.215339
00000008_6.tif	control	LX645	dop1	9.571	12.54	4.89045	5.10451	0.214052	1	0.29777	1.51997	0.0637384
00000008_6.tif	control	LX645	dop1	10.293	13.102	4.89045	4.78017	-0.110286	0	0.29777	1.42339	-0.0328398
00000008_6.tif	control	LX645	dop1	10.439	13.102	4.89045	4.66344	-0.22701	0	0.29777	1.38863	-0.0675968
00000008_6.tif	control	LX645	dop1	10.342	12.936	4.89045	4.64341	-0.247038	0	0.29777	1.38267	-0.0735606
00000008_6.tif	control	LX645	dop1	10.481	12.484	4.89045	4.27962	-0.610836	0	0.29777	1.27434	-0.181889
00000008_6.tif	control	LX645	dop1	11.05	13.151	4.89045	4.22818	-0.662273	0	0.29777	1.25903	-0.197205
00000008_6.tif	control	LX645	dop1	11.05	12.964	4.89045	4.10286	-0.78759	0	0.29777	1.22171	-0.234521
00000008_6.tif	control	LX645	dop1	11.196	14.026	4.89045	4.77605	-0.114406	0	0.29777	1.42216	-0.0340667
00000008_6.tif	control	LX645	dop1	13.592	14.526	4.89045	4.29523	-0.595223	0	0.29777	1.27899	-0.17724
00000008_6.tif	control	LX645	dop1	14.036	13.929	4.89045	3.6645	-1.22595	0	0.29777	1.09118	-0.365051
00000008_6.tif	control	LX645	dop1	13.155	13.964	4.89045	3.82719	-1.06326	0	0.29777	1.13962	-0.316607
00000008_6.tif	control	LX645	dop1	12.564	13.491	4.89045	3.58992	-1.30053	0	0.29777	1.06897	-0.387259
00000008_6.tif	control	LX645	dop1	12.016	13.068	4.89045	3.51665	-1.3738	0	0.29777	1.04715	-0.409077
00000008_6.tif	control	LX645	dop1	12.036	12.964	4.89045	3.42202	-1.46843	0	0.29777	1.01898	-0.437255
00000008_6.tif	control	LX645	dop1	11.932	12.825	4.89045	3.38056	-1.5099	0	0.29777	1.00663	-0.449602
00000008_6.tif	control	LX645	dop1	10.564	11.092	4.89045	3.67113	-1.21932	0	0.29777	1.09315	-0.363077
00000008_6.tif	control	LX645	dop1	9.425	10.05	4.89045	4.72094	-0.169509	0	0.29777	1.40576	-0.0504747
00000008_6.tif	control	LX645	dop1	10.481	9.134	4.89045	3.83106	-1.05939	0	0.29777	1.14077	-0.315455
00000008_6.tif	control	LX645	dop1	10.682	9.467	4.89045	3.55008	-1.34037	0	0.29777	1.05711	-0.399122
00000008_6.tif	control	LX645	dop1	10.849	9.3	4.89045	3.4308	-1.45965	0	0.29777	1.02159	-0.43464
00000008_6.tif	control	LX645	dop1	10.884	9.12	4.89045	3.45273	-1.43772	0	0.29777	1.02812	-0.42811
00000008_6.tif	control	LX645	dop1	11.099	11.62	4.89045	3.32973	-1.56073	0	0.29777	0.991493	-0.464737
00000008_6.tif	control	LX645	dop1	11.231	11.293	4.89045	3.08591	-1.80454	0	0.29777	0.918891	-0.537339
00000008_6.tif	control	LX645	dop1	11.516	11.634	4.89045	2.96008	-1.93038	0	0.29777	0.881422	-0.574808
00000008_6.tif	control	LX645	dop1	11.634	11.821	4.89045	2.9501	-1.94036	0	0.29777	0.87845	-0.57778
00000008_6.tif	control	LX645	dop1	11.252	10.863	4.89045	2.95004	-1.94041	0	0.29777	0.878433	-0.577797
00000008_6.tif	control	LX645	dop1	11.231	10.689	4.89045	2.94058	-1.94987	0	0.29777	0.875617	-0.580613
00000008_6.tif	control	LX645	dop1	11.564	10.842	4.89045	2.64059	-2.24987	0	0.29777	0.786288	-0.669942
00000008_6.tif	control	LX645	dop1	11.592	10.53	4.89045	2.56263	-2.32782	0	0.29777	0.763076	-0.693154
00000008_6.tif	control	LX645	dop1	11.384	10.196	4.89045	2.75789	-2.13256	0	0.29777	0.821216	-0.635014
00000008_6.tif	control	LX645	dop1	11.425	10.161	4.89045	2.71803	-2.17242	0	0.29777	0.809347	-0.646883
00000008_6.tif	control	LX645	dop1	11.918	10.106	4.89045	2.22875	-2.6617	0	0.29777	0.663655	-0.792575
00000008_6.tif	control	LX645	dop1	12.016	10.155	4.89045	2.1279	-2.76256	0	0.29777	0.633624	-0.822606
00000008_6.tif	control	LX645	dop1	12.12	10.217	4.89045	2.02159	-2.86886	0	0.29777	0.60197	-0.85426
00000008_6.tif	control	LX645	dop1	12.182	10.293	4.89045	1.95919	-2.93127	0	0.29777	0.583387	-0.872843
00000008_6.tif	control	LX645	dop1	12.349	10.293	4.89045	1.7922	-3.09825	0	0.29777	0.533664	-0.922566
00000008_6.tif	control	LX645	dop1	12.377	10.217	4.89045	1.76468	-3.12577	0	0.29777	0.525469	-0.930761
00000008_6.tif	control	LX645	dop1	12.245	10.613	4.89045	1.92749	-2.96296	0	0.29777	0.573949	-0.882281
00000008_6.tif	control	LX645	dop1	12.043	10.759	4.89045	2.15515	-2.73531	0	0.29777	0.641738	-0.814492
00000008_6.tif	control	LX645	dop1	11.96	11.05	4.89045	2.31763	-2.57282	0	0.29777	0.690121	-0.766109
00000008_6.tif	control	LX645	dop1	12.071	11.238	4.89045	2.28685	-2.6036	0	0.29777	0.680955	-0.775275
00000008_6.tif	control	LX645	dop1	12.28	11.266	4.89045	2.11266	-2.7778	0	0.29777	0.629086	-0.827144
00000008_6.tif	control	LX645	dop1	12.238	9.807	4.89045	1.95757	-2.93288	0	0.29777	0.582906	-0.873324
00000008_6.tif	control	LX645	dop1	12.099	9.488	4.89045	2.18519	-2.70526	0	0.29777	0.650684	-0.805547
00000008_6.tif	control	LX645	dop1	11.55	9.161	4.89045	2.81679	-2.07366	0	0.29777	0.838756	-0.617475
00000008_6.tif	control	LX645	dop1	11.655	8.807	4.89045	2.88251	-2.00794	0	0.29777	0.858326	-0.597905
00000008_6.tif	control	LX645	dop1	11.689	8.495	4.89045	3.02469	-1.86576	0	0.29777	0.900662	-0.555569
00000008_6.tif	control	LX645	dop1	13.821	9.432	4.89045	0.893284	-3.99717	0	0.29777	0.265993	-1.19024
00000008_6.tif	control	LX645	dop1	13.884	9.717	4.89045	0.606177	-4.28428	0	0.29777	0.180501	-1.27573
00000008_6.tif	control	LX645	dop1	13.773	9.898	4.89045	0.520431	-4.37002	0	0.29777	0.154969	-1.30126
00000008_6.tif	control	LX645	dop1	14.203	9.932	4.89045	0.339706	-4.55075	0	0.29777	0.101154	-1.35508
00000008_6.tif	control	LX645	dop1	14.113	10.398	4.89045	0.134937	-4.75552	0	0.29777	0.0401802	-1.41605
00000008_6.tif	control	LX645	dop1	13.509	10.918	4.89045	0.908035	-3.98242	0	0.29777	0.270386	-1.18584
00000008_6.tif	control	LX645	dop1	13.655	11.016	4.89045	0.893698	-3.99676	0	0.29777	0.266116	-1.19011
00000008_6.tif	control	LX645	dop1	13.606	11.196	4.89045	1.0729	-3.81755	0	0.29777	0.319479	-1.13675
00000008_6.tif	control	LX645	dop1	13.578	11.28	4.89045	1.15981	-3.73064	0	0.29777	0.345357	-1.11087
00000008_6.tif	control	LX645	dop1	13.648	11.495	4.89045	1.32419	-3.56626	0	0.29777	0.394305	-1.06192
00000008_6.tif	control	LX645	dop1	13.55	11.592	4.89045	1.45174	-3.43871	0	0.29777	0.432285	-1.02394
00000008_6.tif	control	LX645	dop1	13.786	11.161	4.89045	0.962834	-3.92762	0	0.29777	0.286703	-1.16953
00000008_6.tif	control	LX645	dop1	13.884	11.53	4.89045	1.28986	-3.60059	0	0.29777	0.384082	-1.07215
00000008_6.tif	control	LX645	dop1	14.21	11.175	4.89045	0.911615	-3.97884	0	0.29777	0.271452	-1.18478
00000008_6.tif	control	LX645	dop1	14.036	11.967	4.89045	1.70424	-3.18622	0	0.29777	0.507471	-0.948759
00000008_6.tif	control	LX645	dop1	13.932	12.571	4.89045	2.31446	-2.576	0	0.29777	0.689176	-0.767055
00000008_6.tif	control	LX645	dop1	14.043	12.578	4.89045	2.31408	-2.57638	0	0.29777	0.689062	-0.767168
00000008_6.tif	control	LX645	dop1	14.203	12.453	4.89045	2.18788	-2.70257	0	0.29777	0.651485	-0.804746
00000008_6.tif	control	LX645	dop1	14.148	12.724	4.89045	2.45801	-2.43244	0	0.29777	0.731922	-0.724309
00000008_6.tif	control	LX645	dop1	11.675	7.439	4.89045	3.75141	-1.13904	0	0.29777	1.11706	-0.339173
00000008_6.tif	control	LX645	dop1	11.238	6.898	4.89045	4.44644	-0.444013	0	0.29777	1.32402	-0.132214
00000008_6.tif	control	LX645	dop1	11.057	6.439	4.89045	4.91498	0.0245225	1	0.29777	1.46353	0.00730206
00000008_6.tif	control	LX645	dop1	11.023	6.328	4.89045	5.02292	0.132471	1	0.29777	1.49568	0.0394459
00000008_6.tif	control	LX645	dop1	10.918	6.175	4.89045	5.20807	0.317619	1	0.29777	1.55081	0.0945773
00000008_6.tif	control	LX645	dop1	10.53	5.46	4.89045	6.0114	1.12095	1	0.29777	1.79002	0.333785
00000008_6.tif	control	LX645	dop1	13.328	6.898	4.89045	3.46474	-1.42572	0	0.29777	1.03169	-0.424536
00000008_6.tif	control	LX645	dop1	13.439	6.946	4.89045	3.39341	-1.49705	0	0.29777	1.01045	-0.445776
00000008_6.tif	control	LX645	dop1	13.002	6.307	4.89045	4.11959	-0.770866	0	0.29777	1.22669	-0.229541
00000008_6.tif	control	LX645	dop1	13.293	5.835	4.89045	4.51141	-0.379038	0	0.29777	1.34336	-0.112866
00000008_6.tif	control	LX645	dop1	12.585	2.717	4.89045	7.70769	2.81724	1	0.29777	2.29512	0.83889
00000008_6.tif	control	LX645	dop1	14.436	6.488	4.89045	3.7895	-1.10095	0	0.29777	1.1284	-0.327831
00000008_6.tif	control	LX645	dop1	15.877	6.797	4.89045	3.87913	-1.01132	0	0.29777	1.15509	-0.301141
00000008_6.tif	control	LX645	dop1	14.731	7.839	4.89045	2.49768	-2.39277	0	0.29777	0.743736	-0.712495
00000008_6.tif	control	LX645	dop1	15.286	7.977	4.89045	2.5594	-2.33105	0	0.29777	0.762114	-0.694117
00000008_6.tif	control	LX645	dop1	15.415	7.922	4.89045	2.66785	-2.22261	0	0.29777	0.794405	-0.661825
00000008_6.tif	control	LX645	dop1	16.109	8.335	4.89045	2.75713	-2.13332	0	0.29777	0.820992	-0.635239
00000008_6.tif	control	LX645	dop1	14.582	8.918	4.89045	1.4183	-3.47215	0	0.29777	0.422328	-1.0339
00000008_6.tif	control	LX645	dop1	14.45	8.946	4.89045	1.35568	-3.53477	0	0.29777	0.403682	-1.05255
00000008_6.tif	control	LX645	dop1	14.498	9.839	4.89045	0.556577	-4.33388	0	0.29777	0.165732	-1.2905
00000008_6.tif	control	LX645	dop1	14.696	9.825	4.89045	0.708877	-4.18158	0	0.29777	0.211082	-1.24515
00000008_6.tif	control	LX645	dop1	14.345	10.023	4.89045	0.317277	-4.57318	0	0.29777	0.0944757	-1.36175
00000008_6.tif	control	LX645	dop1	15.387	9.731	4.89045	1.356	-3.53445	0	0.29777	0.403777	-1.05245
00000008_6.tif	control	LX645	dop1	14.595	10.519	4.89045	0.519736	-4.37072	0	0.29777	0.154762	-1.30147
00000008_6.tif	control	LX645	dop1	14.595	10.585	4.89045	0.554867	-4.33559	0	0.29777	0.165223	-1.29101
00000008_6.tif	control	LX645	dop1	14.512	10.693	4.89045	0.565659	-4.32479	0	0.29777	0.168436	-1.28779
00000008_6.tif	control	LX645	dop1	14.557	10.762	4.89045	0.647358	-4.2431	0	0.29777	0.192764	-1.26347
00000008_6.tif	control	LX645	dop1	14.387	11.113	4.89045	0.882001	-4.00845	0	0.29777	0.262633	-1.1936
00000008_6.tif	control	LX645	dop1	14.651	11.075	4.89045	0.956337	-3.93412	0	0.29777	0.284769	-1.17146
00000008_6.tif	control	LX645	dop1	14.863	10.543	4.89045	0.773313	-4.11714	0	0.29777	0.230269	-1.22596
00000008_6.tif	control	LX645	dop1	15.304	10.245	4.89045	1.16319	-3.72726	0	0.29777	0.346363	-1.10987
00000008_6.tif	control	LX645	dop1	15.484	10.502	4.89045	1.36358	-3.52688	0	0.29777	0.406033	-1.0502
00000008_6.tif	control	LX645	dop1	15.512	10.655	4.89045	1.42512	-3.46533	0	0.29777	0.424357	-1.03187
00000008_6.tif	control	LX645	dop1	15.634	10.849	4.89045	1.60279	-3.28766	0	0.29777	0.477263	-0.978967
00000008_6.tif	control	LX645	dop1	15.929	10.866	4.89045	1.88599	-3.00447	0	0.29777	0.56159	-0.89464
00000008_6.tif	control	LX645	dop1	15.769	11.092	4.89045	1.82556	-3.0649	0	0.29777	0.543596	-0.912634
00000008_6.tif	control	LX645	dop1	16.078	10.359	4.89045	1.93923	-2.95122	0	0.29777	0.577445	-0.878785
00000008_6.tif	control	LX645	dop1	16.182	10.332	4.89045	2.04207	-2.84839	0	0.29777	0.608066	-0.848164
00000008_6.tif	control	LX645	dop1	15.366	12.127	4.89045	2.22799	-2.66246	0	0.29777	0.663429	-0.792801
00000008_6.tif	control	LX645	dop1	15.512	12.075	4.89045	2.26983	-2.62062	0	0.29777	0.675887	-0.780343
00000008_6.tif	control	LX645	dop1	15.068	12.804	4.89045	2.70199	-2.18846	0	0.29777	0.804573	-0.651657
00000008_6.tif	control	LX645	dop1	15.339	13.012	4.89045	2.99595	-1.8945	0	0.29777	0.892104	-0.564126
00000008_6.tif	control	LX645	dop1	14.436	13.259	4.89045	3.0075	-1.88295	0	0.29777	0.895544	-0.560686
00000008_6.tif	control	LX645	dop1	16.03	12.582	4.89045	2.98867	-1.90178	0	0.29777	0.889938	-0.566293
00000008_6.tif	control	LX645	dop1	16.137	12.512	4.89045	3.00475	-1.8857	0	0.29777	0.894725	-0.561505
00000008_6.tif	control	LX645	dop1	16.089	12.349	4.89045	2.85195	-2.03851	0	0.29777	0.849224	-0.607006
00000008_6.tif	control	LX645	dop1	15.891	13.467	4.89045	3.64814	-1.24232	0	0.29777	1.08631	-0.369925
00000008_6.tif	control	LX645	dop1	15.734	13.446	4.89045	3.55669	-1.33376	0	0.29777	1.05908	-0.397154
00000008_6.tif	control	LX645	dop1	14.72	14.075	4.89045	3.85276	-1.0377	0	0.29777	1.14723	-0.308995
00000008_6.tif	control	LX645	dop1	14.464	14.411	4.89045	4.15757	-0.732887	0	0.29777	1.238	-0.218232
00000008_6.tif	control	LX645	dop1	14.759	14.891	4.89045	4.66611	-0.224347	0	0.29777	1.38943	-0.0668037
00000008_6.tif	control	LX645	dop1	14.748	15.224	4.89045	4.99502	0.104566	1	0.29777	1.48737	0.0311365
00000008_6.tif	control	LX645	dop1	15.405	14.929	4.89045	4.83128	-0.0591733	0	0.29777	1.43861	-0.01762
00000008_6.tif	control	LX645	dop1	15.38	14.786	4.89045	4.68674	-0.203714	0	0.29777	1.39557	-0.06066
00000008_6.tif	control	LX645	dop1	15.373	14.571	4.89045	4.47782	-0.412636	0	0.29777	1.33336	-0.122871
00000008_6.tif	control	LX645	dop1	15.464	14.536	4.89045	4.47026	-0.420193	0	0.29777	1.33111	-0.125121
00000008_6.tif	control	LX645	dop1	15.62	14.804	4.89045	4.77293	-0.117521	0	0.29777	1.42124	-0.0349941
00000008_6.tif	control	LX645	dop1	15.679	14.707	4.89045	4.69978	-0.190674	0	0.29777	1.39945	-0.056777
00000008_6.tif	control	LX645	dop1	15.8	14.79	4.89045	4.81859	-0.0718582	0	0.29777	1.43483	-0.0213972
00000008_6.tif	control	LX645	dop1	16.064	14.623	4.89045	4.7625	-0.127956	0	0.29777	1.41813	-0.0381015
00000008_6.tif	control	LX645	dop1	15.682	15.043	4.89045	5.0194	0.12895	1	0.29777	1.49463	0.0383975
00000008_6.tif	control	LX645	dop1	16.057	14.932	4.89045	5.04407	0.153614	1	0.29777	1.50197	0.0457416
00000008_6.tif	control	LX645	dop1	15.974	15.179	4.89045	5.2438	0.353349	1	0.29777	1.56145	0.105217
00000008_6.tif	control	LX645	dop1	16.127	15.561	4.89045	5.65519	0.764741	1	0.29777	1.68395	0.227717
00000008_6.tif	control	LX645	dop1	15.974	15.776	4.89045	5.80689	0.916438	1	0.29777	1.72912	0.272888
00000008_6.tif	control	LX645	dop1	15.241	15.411	4.89045	5.26128	0.370823	1	0.29777	1.56665	0.11042
00000008_6.tif	control	LX645	dop1	17.036	15.661	4.89045	6.12267	1.23221	1	0.29777	1.82315	0.366916
00000008_6.tif	control	LX645	dop1	18.443	14.766	4.89045	6.22553	1.33508	1	0.29777	1.85378	0.397545
00000008_6.tif	control	LX645	dop1	18.292	14.135	4.89045	5.6745	0.784048	1	0.29777	1.6897	0.233466
00000008_6.tif	control	LX645	dop1	18.13	14.177	4.89045	5.58642	0.695963	1	0.29777	1.66347	0.207237
00000008_6.tif	control	LX645	dop1	19.417	15.141	4.89045	7.18344	2.29299	1	0.29777	2.13901	0.682783
00000008_6.tif	control	LX645	dop1	19.542	15.078	4.89045	7.23368	2.34323	1	0.29777	2.15397	0.697743
00000008_6.tif	control	LX645	dop1	16.75	14.927	4.89045	5.34152	0.451064	1	0.29777	1.59054	0.134313
00000008_6.tif	control	LX645	dop1	16.948	14.932	4.89045	5.44526	0.554802	1	0.29777	1.62143	0.165203
00000008_6.tif	control	LX645	dop1	16.995	14.839	4.89045	5.39051	0.500061	1	0.29777	1.60513	0.148903
00000008_6.tif	control	LX645	dop1	16.76	14.698	4.89045	5.14799	0.257535	1	0.29777	1.53292	0.0766863
00000008_6.tif	control	LX645	dop1	16.615	14.672	4.89045	5.05307	0.162616	1	0.29777	1.50465	0.0484223
00000008_6.tif	control	LX645	dop1	16.552	14.667	4.89045	5.01814	0.127686	1	0.29777	1.49425	0.0380211
00000008_6.tif	control	LX645	dop1	16.26	14.474	4.89045	4.71141	-0.179039	0	0.29777	1.40292	-0.0533124
00000008_6.tif	control	LX645	dop1	16.339	14.812	4.89045	5.04949	0.159034	1	0.29777	1.50359	0.0473556
00000008_6.tif	control	LX645	dop1	16.76	14.562	4.89045	5.03138	0.140926	1	0.29777	1.49819	0.0419636
00000008_6.tif	control	LX645	dop1	16.833	14.536	4.89045	5.04775	0.157295	1	0.29777	1.50307	0.0468378
00000008_6.tif	control	LX645	dop1	17.115	14.557	4.89045	5.22086	0.330405	1	0.29777	1.55461	0.0983846
00000008_6.tif	control	LX645	dop1	17.25	14.682	4.89045	5.40064	0.510189	1	0.29777	1.60815	0.151919
00000008_6.tif	control	LX645	dop1	16.792	14.286	4.89045	4.81541	-0.0750403	0	0.29777	1.43389	-0.0223447
00000008_6.tif	control	LX645	dop1	16.891	14.172	4.89045	4.77696	-0.113494	0	0.29777	1.42244	-0.0337952
00000008_6.tif	control	LX645	dop1	17	14.271	4.89045	4.92076	0.0303096	1	0.29777	1.46526	0.0090253
00000008_6.tif	control	LX645	dop1	16.141	13.917	4.89045	4.16291	-0.727545	0	0.29777	1.23959	-0.216641
00000008_6.tif	control	LX645	dop1	16.24	13.885	4.89045	4.18365	-0.706799	0	0.29777	1.24577	-0.210464
00000008_6.tif	control	LX645	dop1	16.245	13.604	4.89045	3.94576	-0.944688	0	0.29777	1.17493	-0.2813
00000008_6.tif	control	LX645	dop1	16.354	13.74	4.89045	4.11899	-0.771467	0	0.29777	1.22651	-0.22972
00000008_6.tif	control	LX645	dop1	16.417	13.682	4.89045	4.10478	-0.785672	0	0.29777	1.22228	-0.233949
00000008_6.tif	control	LX645	dop1	16.562	13.651	4.89045	4.16167	-0.728787	0	0.29777	1.23922	-0.217011
00000008_6.tif	control	LX645	dop1	16.323	12.891	4.89045	3.41347	-1.47699	0	0.29777	1.01643	-0.439803
00000008_6.tif	control	LX645	dop1	16.286	12.578	4.89045	3.15379	-1.73667	0	0.29777	0.939103	-0.517127
00000008_6.tif	control	LX645	dop1	17.188	12.708	4.89045	3.90481	-0.985639	0	0.29777	1.16274	-0.293494
00000008_6.tif	control	LX645	dop1	17.37	12.594	4.89045	3.98071	-0.909747	0	0.29777	1.18534	-0.270895
00000008_6.tif	control	LX645	dop1	17.302	12.448	4.89045	3.84097	-1.04948	0	0.29777	1.14373	-0.312505
00000008_6.tif	control	LX645	dop1	17.521	12.443	4.89045	4.02041	-0.870039	0	0.29777	1.19716	-0.259072
00000008_6.tif	control	LX645	dop1	17.641	12.427	4.89045	4.11338	-0.77707	0	0.29777	1.22484	-0.231388
00000008_6.tif	control	LX645	dop1	17.911	12.276	4.89045	4.27235	-0.6181	0	0.29777	1.27218	-0.184052
00000008_6.tif	control	LX645	dop1	16.349	11.224	4.89045	2.40687	-2.48358	0	0.29777	0.716694	-0.739536
00000008_6.tif	control	LX645	dop1	17.432	11.13	4.89045	3.40253	-1.48793	0	0.29777	1.01317	-0.44306
00000008_6.tif	control	LX645	dop1	16.516	10.057	4.89045	2.38418	-2.50627	0	0.29777	0.709937	-0.746293
00000008_6.tif	control	LX645	dop1	16.432	9.833	4.89045	2.33156	-2.55889	0	0.29777	0.694268	-0.761962
00000008_6.tif	control	LX645	dop1	16.25	9.849	4.89045	2.14983	-2.74062	0	0.29777	0.640155	-0.816075
00000008_6.tif	control	LX645	dop1	16.432	9.568	4.89045	2.39497	-2.49548	0	0.29777	0.71315	-0.74308
00000008_6.tif	control	LX645	dop1	16.521	9.479	4.89045	2.50674	-2.38371	0	0.29777	0.746433	-0.709797
00000008_6.tif	control	LX645	dop1	16.229	10.448	4.89045	2.09592	-2.79454	0	0.29777	0.624101	-0.832129
00000008_6.tif	control	LX645	dop1	17.661	10.302	4.89045	3.52018	-1.37027	0	0.29777	1.04821	-0.408025
00000008_6.tif	control	LX645	dop1	17.865	10.021	4.89045	3.73205	-1.1584	0	0.29777	1.11129	-0.344938
00000008_6.tif	control	LX645	dop1	17.974	9.823	4.89045	3.85851	-1.03194	0	0.29777	1.14895	-0.30728
00000008_6.tif	control	LX645	dop1	17.526	9.797	4.89045	3.41734	-1.47312	0	0.29777	1.01758	-0.43865
00000008_6.tif	control	LX645	dop1	18.245	10.734	4.89045	4.1306	-0.759855	0	0.29777	1.22997	-0.226262
00000008_6.tif	control	LX645	dop1	18.729	10.719	4.89045	4.61031	-0.280144	0	0.29777	1.37281	-0.0834184
00000008_6.tif	control	LX645	dop1	18.807	10.729	4.89045	4.68892	-0.201538	0	0.29777	1.39622	-0.060012
00000008_6.tif	control	LX645	dop1	18.599	9.411	4.89045	4.53925	-0.351203	0	0.29777	1.35165	-0.104578
00000008_6.tif	control	LX645	dop1	18.661	9.25	4.89045	4.63278	-0.257673	0	0.29777	1.3795	-0.0767271
00000008_6.tif	control	LX645	dop1	16.266	8.583	4.89045	2.71074	-2.17971	0	0.29777	0.807177	-0.649053
00000008_6.tif	control	LX645	dop1	16.479	8.203	4.89045	3.11805	-1.77241	0	0.29777	0.928461	-0.52777
00000008_6.tif	control	LX645	dop1	16.635	8.266	4.89045	3.19688	-1.69357	0	0.29777	0.951935	-0.504296
00000008_6.tif	control	LX645	dop1	16.411	7.896	4.89045	3.28174	-1.60872	0	0.29777	0.977203	-0.479027
00000008_6.tif	control	LX645	dop1	17.172	8.219	4.89045	3.65748	-1.23297	0	0.29777	1.08909	-0.367142
00000008_6.tif	control	LX645	dop1	17.401	8.188	4.89045	3.86596	-1.02449	0	0.29777	1.15117	-0.305062
00000008_6.tif	control	LX645	dop1	17.594	8.401	4.89045	3.92447	-0.965987	0	0.29777	1.16859	-0.287642
00000008_6.tif	control	LX645	dop1	17.646	8.531	4.89045	3.91091	-0.979539	0	0.29777	1.16455	-0.291677
00000008_6.tif	control	LX645	dop1	17.802	8.495	4.89045	4.06686	-0.823592	0	0.29777	1.21099	-0.245241
00000008_6.tif	control	LX645	dop1	17.859	8.495	4.89045	4.11825	-0.772205	0	0.29777	1.22629	-0.22994
00000008_6.tif	control	LX645	dop1	17.964	8.552	4.89045	4.18964	-0.700808	0	0.29777	1.24755	-0.20868
00000008_6.tif	control	LX645	dop1	18.135	8.948	4.89045	4.20585	-0.684605	0	0.29777	1.25238	-0.203855
00000008_6.tif	control	LX645	dop1	18.052	8.333	4.89045	4.36262	-0.527838	0	0.29777	1.29906	-0.157174
00000008_6.tif	control	LX645	dop1	18.062	8.141	4.89045	4.45981	-0.430648	0	0.29777	1.328	-0.128234
00000008_6.tif	control	LX645	dop1	17.844	8.026	4.89045	4.32779	-0.562658	0	0.29777	1.28869	-0.167543
00000008_6.tif	control	LX645	dop1	18	7.979	4.89045	4.48578	-0.40467	0	0.29777	1.33573	-0.120499
00000008_6.tif	control	LX645	dop1	18.38	8.339	4.89045	4.65644	-0.234011	0	0.29777	1.38655	-0.0696816
00000008_6.tif	control	LX645	dop1	17.583	7.958	4.89045	4.14418	-0.746273	0	0.29777	1.23401	-0.222218
00000008_6.tif	control	LX645	dop1	17.729	7.896	4.89045	4.30007	-0.590378	0	0.29777	1.28043	-0.175797
00000008_6.tif	control	LX645	dop1	16.266	6.995	4.89045	3.90065	-0.989804	0	0.29777	1.1615	-0.294734
00000008_6.tif	control	LX645	dop1	16.406	6.578	4.89045	4.328	-0.562455	0	0.29777	1.28875	-0.167482
00000008_6.tif	control	LX645	dop1	17.203	7.12	4.89045	4.39012	-0.500332	0	0.29777	1.30725	-0.148984
00000008_6.tif	control	LX645	dop1	17.344	7.13	4.89045	4.4826	-0.407853	0	0.29777	1.33478	-0.121446
00000008_6.tif	control	LX645	dop1	17.427	7.156	4.89045	4.52437	-0.366086	0	0.29777	1.34722	-0.109009
00000008_6.tif	control	LX645	dop1	17.906	7.422	4.89045	4.71843	-0.172025	0	0.29777	1.40501	-0.051224
00000008_6.tif	control	LX645	dop1	19.839	9.922	4.89045	5.70837	0.817921	1	0.29777	1.69978	0.243552
00000008_6.tif	control	LX645	dop1	19.844	10.193	4.89045	5.70347	0.813014	1	0.29777	1.69832	0.242091
00000008_6.tif	control	LX645	dop1	20.219	14.734	4.89045	7.54355	2.65309	1	0.29777	2.24624	0.790012
00000008_6.tif	control	LX645	dop1	20.818	15.391	4.89045	8.41712	3.52667	1	0.29777	2.50637	1.05014
00000009_7.tif	predator	LX645	dop1	7.469	17.984	5.19266	10.5208	5.32816	1	0.29777	3.13278	1.58656
00000009_7.tif	predator	LX645	dop1	8.833	16.255	5.19266	8.32462	3.13197	1	0.29777	2.47882	0.932605
00000009_7.tif	predator	LX645	dop1	9.375	9.479	5.19266	5.1875	-0.00516198	0	0.29777	1.54468	-0.00153708
00000009_7.tif	predator	LX645	dop1	9.38	9.255	5.19266	5.21722	0.0245606	1	0.29777	1.55353	0.00731341
00000009_7.tif	predator	LX645	dop1	9.234	8.75	5.19266	5.47006	0.277405	1	0.29777	1.62882	0.082603
00000009_7.tif	predator	LX645	dop1	6.766	7.792	5.19266	8.10721	2.91455	1	0.29777	2.41408	0.867867
00000009_7.tif	predator	LX645	dop1	6.76	7.604	5.19266	8.17008	2.97742	1	0.29777	2.4328	0.886586
00000009_7.tif	predator	LX645	dop1	7.865	7.708	5.19266	7.09275	1.90009	1	0.29777	2.11201	0.56579
00000009_7.tif	predator	LX645	dop1	9.042	7.203	5.19266	6.22733	1.03467	1	0.29777	1.85431	0.308094
00000009_7.tif	predator	LX645	dop1	8.901	7.094	5.19266	6.4033	1.21065	1	0.29777	1.90671	0.360494
00000009_7.tif	predator	LX645	dop1	9.391	7.089	5.19266	5.98085	0.788186	1	0.29777	1.78092	0.234698
00000009_7.tif	predator	LX645	dop1	8.995	5.578	5.19266	7.18236	1.9897	1	0.29777	2.13869	0.592473
00000009_7.tif	predator	LX645	dop1	9.12	5.651	5.19266	7.03962	1.84696	1	0.29777	2.09619	0.54997
00000009_7.tif	predator	LX645	dop1	9.146	5.552	5.19266	7.08388	1.89122	1	0.29777	2.10937	0.563148
00000009_7.tif	predator	LX645	dop1	8.094	4.214	5.19266	8.76013	3.56747	1	0.29777	2.6085	1.06229
00000009_7.tif	predator	LX645	dop1	8.057	4.047	5.19266	8.90137	3.70871	1	0.29777	2.65056	1.10434
00000009_7.tif	predator	LX645	dop1	11.458	2.87	5.19266	7.91647	2.72382	1	0.29777	2.35729	0.81107
00000009_7.tif	predator	LX645	dop1	12.688	3.74	5.19266	6.68672	1.49406	1	0.29777	1.9911	0.444886
00000009_7.tif	predator	LX645	dop1	12.755	3.828	5.19266	6.58388	1.39122	1	0.29777	1.96048	0.414263
00000009_7.tif	predator	LX645	dop1	13.219	4.417	5.19266	5.89934	0.706682	1	0.29777	1.75665	0.210429
00000009_7.tif	predator	LX645	dop1	13.198	4.682	5.19266	5.64599	0.453332	1	0.29777	1.68121	0.134989
00000009_7.tif	predator	LX645	dop1	12.953	4.896	5.19266	5.50265	0.309989	1	0.29777	1.63852	0.0923056
00000009_7.tif	predator	LX645	dop1	9.714	5.552	5.19266	6.6636	1.47094	1	0.29777	1.98422	0.438003
00000009_7.tif	predator	LX645	dop1	10.375	5.318	5.19266	6.38038	1.18772	1	0.29777	1.89988	0.353666
00000009_7.tif	predator	LX645	dop1	9.76	7.161	5.19266	5.629	0.436342	1	0.29777	1.67615	0.12993
00000009_7.tif	predator	LX645	dop1	11.089	6.073	5.19266	5.34286	0.150198	1	0.29777	1.59094	0.0447246
00000009_7.tif	predator	LX645	dop1	11.214	6.167	5.19266	5.19069	-0.00197269	0	0.29777	1.54563	-0.000587409
00000009_7.tif	predator	LX645	dop1	11.266	6.036	5.19266	5.26013	0.0674732	1	0.29777	1.56631	0.0200915
00000009_7.tif	predator	LX645	dop1	11.297	6.115	5.19266	5.17892	-0.0137397	0	0.29777	1.54213	-0.00409126
00000009_7.tif	predator	LX645	dop1	11.391	6.01	5.19266	5.2046	0.0119413	1	0.29777	1.54977	0.00355576
00000009_7.tif	predator	LX645	dop1	13.078	6.266	5.19266	4.16229	-1.03037	0	0.29777	1.23941	-0.306812
00000009_7.tif	predator	LX645	dop1	10.318	8.589	5.19266	4.48655	-0.706114	0	0.29777	1.33596	-0.210259
00000009_7.tif	predator	LX645	dop1	12.896	10.927	5.19266	1.7873	-3.40536	0	0.29777	0.532203	-1.01402
00000009_7.tif	predator	LX645	dop1	12.599	11.135	5.19266	2.14529	-3.04737	0	0.29777	0.638802	-0.907416
00000009_7.tif	predator	LX645	dop1	13.042	11.422	5.19266	1.93266	-3.26	0	0.29777	0.575488	-0.97073
00000009_7.tif	predator	LX645	dop1	12.682	13.115	5.19266	3.46768	-1.72498	0	0.29777	1.03257	-0.513647
00000009_7.tif	predator	LX645	dop1	13.151	15.438	5.19266	5.44004	0.247376	1	0.29777	1.61988	0.073661
00000009_7.tif	predator	LX645	dop1	9.854	16.682	5.19266	8.00714	2.81448	1	0.29777	2.38429	0.838069
00000009_7.tif	predator	LX645	dop1	10.531	17.547	5.19266	8.38277	3.19011	1	0.29777	2.49614	0.94992
00000009_7.tif	predator	LX645	dop1	12.531	17.526	5.19266	7.61719	2.42453	1	0.29777	2.26817	0.721952
00000009_7.tif	predator	LX645	dop1	14.099	19.479	5.19266	9.31634	4.12368	1	0.29777	2.77413	1.22791
00000009_7.tif	predator	LX645	dop1	14.151	19.479	5.19266	9.31415	4.1215	1	0.29777	2.77348	1.22726
00000009_7.tif	predator	LX645	dop1	14.995	19.823	5.19266	9.66288	4.47022	1	0.29777	2.87732	1.3311
00000009_7.tif	predator	LX645	dop1	14.453	15.484	5.19266	5.31237	0.119714	1	0.29777	1.58187	0.0356473
00000009_7.tif	predator	LX645	dop1	14.573	16.073	5.19266	5.90128	0.708616	1	0.29777	1.75722	0.211005
00000009_7.tif	predator	LX645	dop1	14.823	16.182	5.19266	6.01784	0.825176	1	0.29777	1.79193	0.245713
00000009_7.tif	predator	LX645	dop1	14.984	16.005	5.19266	5.85174	0.659085	1	0.29777	1.74247	0.196256
00000009_7.tif	predator	LX645	dop1	15.094	15.818	5.19266	5.67551	0.482849	1	0.29777	1.69	0.143778
00000009_7.tif	predator	LX645	dop1	14.932	15.021	5.19266	4.86681	-0.325848	0	0.29777	1.44919	-0.0970277
00000009_7.tif	predator	LX645	dop1	15.693	15.568	5.19266	5.52287	0.330215	1	0.29777	1.64455	0.0983282
00000009_7.tif	predator	LX645	dop1	15.719	15.068	5.19266	5.04163	-0.15103	0	0.29777	1.50125	-0.0449723
00000009_7.tif	predator	LX645	dop1	16.656	13.797	5.19266	4.20954	-0.98312	0	0.29777	1.25347	-0.292744
00000009_7.tif	predator	LX645	dop1	14.578	11.771	5.19266	1.6002	-3.59246	0	0.29777	0.476492	-1.06973
00000009_7.tif	predator	LX645	dop1	13.724	11.573	5.19266	1.60937	-3.58329	0	0.29777	0.479221	-1.067
00000009_7.tif	predator	LX645	dop1	13.625	6.599	5.19266	3.68242	-1.51024	0	0.29777	1.09651	-0.449704
00000009_7.tif	predator	LX645	dop1	13.63	6.339	5.19266	3.93407	-1.25859	0	0.29777	1.17145	-0.374771
00000009_7.tif	predator	LX645	dop1	16.312	5.578	5.19266	4.93259	-0.260069	0	0.29777	1.46878	-0.0774406
00000009_7.tif	predator	LX645	dop1	15.531	3.542	5.19266	6.70724	1.51458	1	0.29777	1.99722	0.450998
00000009_7.tif	predator	LX645	dop1	13.427	3.771	5.19266	6.49297	1.30032	1	0.29777	1.93341	0.387195
00000009_7.tif	predator	LX645	dop1	13.427	1.547	5.19266	8.69348	3.50082	1	0.29777	2.58866	1.04244
00000009_7.tif	predator	LX645	dop1	18.141	4.094	5.19266	7.07691	1.88425	1	0.29777	2.10729	0.561074
00000009_7.tif	predator	LX645	dop1	18.073	4.151	5.19266	6.99319	1.80053	1	0.29777	2.08236	0.536144
00000009_7.tif	predator	LX645	dop1	17.917	4.609	5.19266	6.52026	1.3276	1	0.29777	1.94154	0.395319
00000009_7.tif	predator	LX645	dop1	17.953	4.755	5.19266	6.41536	1.2227	1	0.29777	1.9103	0.364084
00000009_7.tif	predator	LX645	dop1	17.911	5.031	5.19266	6.16084	0.968177	1	0.29777	1.83451	0.288294
00000009_7.tif	predator	LX645	dop1	18	5.089	5.19266	6.1624	0.969738	1	0.29777	1.83498	0.288759
00000009_7.tif	predator	LX645	dop1	19.193	10.203	5.19266	4.6771	-0.515557	0	0.29777	1.3927	-0.153517
00000009_7.tif	predator	LX645	dop1	19.354	12.568	5.19266	5.3988	0.206142	1	0.29777	1.6076	0.061383
00000009_7.tif	predator	LX645	dop1	18.177	13.589	5.19266	5.00787	-0.184785	0	0.29777	1.49119	-0.0550233
00000009_7.tif	predator	LX645	dop1	18.089	14.286	5.19266	5.44897	0.256315	1	0.29777	1.62254	0.076323
00000009_7.tif	predator	LX645	dop1	21.135	13.047	5.19266	7.21642	2.02377	1	0.29777	2.14883	0.602617
00000009_7.tif	predator	LX645	dop1	20.656	12.792	5.19266	6.67563	1.48297	1	0.29777	1.9878	0.441583
00000009_7.tif	predator	LX645	dop1	23.135	12.536	5.19266	8.93732	3.74466	1	0.29777	2.66127	1.11505
00000009_7.tif	predator	LX645	dop1	20.672	12.177	5.19266	6.47428	1.28163	1	0.29777	1.92785	0.38163
00000009_7.tif	predator	LX645	dop1	20.807	12.214	5.19266	6.61411	1.42145	1	0.29777	1.96948	0.423265
00000009_7.tif	predator	LX645	dop1	20.99	12.016	5.19266	6.73149	1.53883	1	0.29777	2.00444	0.458219
00000009_7.tif	predator	LX645	dop1	21.573	11.833	5.19266	7.24984	2.05718	1	0.29777	2.15878	0.612566
00000009_7.tif	predator	LX645	dop1	22.083	11.38	5.19266	7.66282	2.47016	1	0.29777	2.28176	0.735539
00000009_7.tif	predator	LX645	dop1	22.896	6.615	5.19266	9.10366	3.911	1	0.29777	2.7108	1.16458
00000009_7.tif	predator	LX645	dop1	22.797	6.453	5.19266	9.07777	3.88511	1	0.29777	2.70309	1.15687
00000009_7.tif	predator	LX645	dop1	22.896	6.448	5.19266	9.1702	3.97754	1	0.29777	2.73061	1.18439
00000009_7.tif	predator	LX645	dop1	22.802	6.339	5.19266	9.1296	3.93695	1	0.29777	2.71852	1.1723
00000009_7.tif	predator	LX645	dop1	23.936	13.352	5.19266	9.94227	4.74961	1	0.29777	2.96051	1.41429
00000009_7.tif	predator	LX645	dop1	23.679	14.241	5.19266	10.0258	4.83317	1	0.29777	2.98539	1.43917
00000009_7.tif	predator	LX645	dop1	23.818	15.457	5.19266	10.6985	5.50587	1	0.29777	3.1857	1.63948
00000010_2.tif	control	CF2805	dop1234	9.12	13.708	5.54182	5.193	-0.348822	0	0.29777	1.54632	-0.103869
00000010_2.tif	control	CF2805	dop1234	10.698	15.104	5.54182	5.09768	-0.444147	0	0.29777	1.51794	-0.132254
00000010_2.tif	control	CF2805	dop1234	11.161	14.849	5.54182	4.64207	-0.899757	0	0.29777	1.38227	-0.267921
00000010_2.tif	control	CF2805	dop1234	10.844	13.578	5.54182	3.79238	-1.74945	0	0.29777	1.12926	-0.520933
00000010_2.tif	control	CF2805	dop1234	10.953	13.479	5.54182	3.64572	-1.89611	0	0.29777	1.08559	-0.564603
00000010_2.tif	control	CF2805	dop1234	10.677	12.854	5.54182	3.4292	-2.11262	0	0.29777	1.02111	-0.629075
00000010_2.tif	control	CF2805	dop1234	8.792	11.562	5.54182	4.68866	-0.853165	0	0.29777	1.39614	-0.254047
00000010_2.tif	control	CF2805	dop1234	10.193	11.401	5.54182	3.28101	-2.26081	0	0.29777	0.976988	-0.673201
00000010_2.tif	control	CF2805	dop1234	8.698	9.807	5.54182	4.8207	-0.72112	0	0.29777	1.43546	-0.214728
00000010_2.tif	control	CF2805	dop1234	9.438	10.062	5.54182	4.04541	-1.49641	0	0.29777	1.2046	-0.445587
00000010_2.tif	control	CF2805	dop1234	9.833	10.51	5.54182	3.59508	-1.94675	0	0.29777	1.07051	-0.579683
00000010_2.tif	control	CF2805	dop1234	10.073	10.203	5.54182	3.39548	-2.14635	0	0.29777	1.01107	-0.639118
00000010_2.tif	control	CF2805	dop1234	10.01	9.88	5.54182	3.52695	-2.01487	0	0.29777	1.05022	-0.599968
00000010_2.tif	control	CF2805	dop1234	10.141	9.854	5.54182	3.40764	-2.13418	0	0.29777	1.01469	-0.635495
00000010_2.tif	control	CF2805	dop1234	10.672	10.089	5.54182	2.83359	-2.70823	0	0.29777	0.843758	-0.806431
00000010_2.tif	control	CF2805	dop1234	10.625	10.479	5.54182	2.80949	-2.73233	0	0.29777	0.836582	-0.813607
00000010_2.tif	control	CF2805	dop1234	10.708	10.474	5.54182	2.7276	-2.81422	0	0.29777	0.812198	-0.837991
00000010_2.tif	control	CF2805	dop1234	10.802	9.438	5.54182	2.94475	-2.59708	0	0.29777	0.876858	-0.773331
00000010_2.tif	control	CF2805	dop1234	9.786	8.906	5.54182	4.0916	-1.45023	0	0.29777	1.21835	-0.431834
00000010_2.tif	control	CF2805	dop1234	9.672	8.547	5.54182	4.36635	-1.17547	0	0.29777	1.30017	-0.35002
00000010_2.tif	control	CF2805	dop1234	9	8.401	5.54182	5.02263	-0.519198	0	0.29777	1.49559	-0.154602
00000010_2.tif	control	CF2805	dop1234	9.615	8.031	5.54182	4.69876	-0.843066	0	0.29777	1.39915	-0.25104
00000010_2.tif	control	CF2805	dop1234	9.562	7.865	5.54182	4.84028	-0.701539	0	0.29777	1.44129	-0.208897
00000010_2.tif	control	CF2805	dop1234	10.021	7.755	5.54182	4.5559	-0.985928	0	0.29777	1.35661	-0.29358
00000010_2.tif	control	CF2805	dop1234	10.266	7.911	5.54182	4.26954	-1.27228	0	0.29777	1.27134	-0.378848
00000010_2.tif	control	CF2805	dop1234	10.469	7.953	5.54182	4.09275	-1.44907	0	0.29777	1.2187	-0.43149
00000010_2.tif	control	CF2805	dop1234	10.484	8.307	5.54182	3.84418	-1.69764	0	0.29777	1.14468	-0.505508
00000010_2.tif	control	CF2805	dop1234	11.104	8.146	5.54182	3.51444	-2.02738	0	0.29777	1.04649	-0.603694
00000010_2.tif	control	CF2805	dop1234	10.177	7.281	5.54182	4.77752	-0.764301	0	0.29777	1.4226	-0.227586
00000010_2.tif	control	CF2805	dop1234	11.026	6.641	5.54182	4.79037	-0.75145	0	0.29777	1.42643	-0.223759
00000010_2.tif	control	CF2805	dop1234	11.589	6.005	5.54182	5.12415	-0.41767	0	0.29777	1.52582	-0.12437
00000010_2.tif	control	CF2805	dop1234	11.302	6.495	5.54182	4.7893	-0.75252	0	0.29777	1.42611	-0.224078
00000010_2.tif	control	CF2805	dop1234	12.057	6.995	5.54182	4.03321	-1.50861	0	0.29777	1.20097	-0.449219
00000010_2.tif	control	CF2805	dop1234	12.151	6.974	5.54182	4.02242	-1.5194	0	0.29777	1.19776	-0.452432
00000010_2.tif	control	CF2805	dop1234	12.828	6.349	5.54182	4.48187	-1.05995	0	0.29777	1.33457	-0.315622
00000010_2.tif	control	CF2805	dop1234	13.115	6.182	5.54182	4.61988	-0.921942	0	0.29777	1.37566	-0.274527
00000010_2.tif	control	CF2805	dop1234	13.229	6.906	5.54182	3.89054	-1.65128	0	0.29777	1.15849	-0.491701
00000010_2.tif	control	CF2805	dop1234	13.432	6.948	5.54182	3.84403	-1.69779	0	0.29777	1.14464	-0.505552
00000010_2.tif	control	CF2805	dop1234	13.469	6.833	5.54182	3.95934	-1.58248	0	0.29777	1.17897	-0.471216
00000010_2.tif	control	CF2805	dop1234	13.406	7.5	5.54182	3.29202	-2.24981	0	0.29777	0.980264	-0.669925
00000010_2.tif	control	CF2805	dop1234	12.854	7.198	5.54182	3.63783	-1.90399	0	0.29777	1.08324	-0.566952
00000010_2.tif	control	CF2805	dop1234	12.724	7.198	5.54182	3.6602	-1.88162	0	0.29777	1.0899	-0.56029
00000010_2.tif	control	CF2805	dop1234	12.417	7.281	5.54182	3.65063	-1.89119	0	0.29777	1.08705	-0.56314
00000010_2.tif	control	CF2805	dop1234	12.458	7.401	5.54182	3.524	-2.01783	0	0.29777	1.04934	-0.600848
00000010_2.tif	control	CF2805	dop1234	11.953	7.292	5.54182	3.79385	-1.74797	0	0.29777	1.12969	-0.520494
00000010_2.tif	control	CF2805	dop1234	11.75	7.375	5.54182	3.80194	-1.73988	0	0.29777	1.1321	-0.518084
00000010_2.tif	control	CF2805	dop1234	11.38	7.62	5.54182	3.76974	-1.77208	0	0.29777	1.12252	-0.527673
00000010_2.tif	control	CF2805	dop1234	11.484	7.646	5.54182	3.6924	-1.84943	0	0.29777	1.09949	-0.550703
00000010_2.tif	control	CF2805	dop1234	12.021	7.557	5.54182	3.52336	-2.01847	0	0.29777	1.04915	-0.601039
00000010_2.tif	control	CF2805	dop1234	12.151	7.682	5.54182	3.35781	-2.18402	0	0.29777	0.999854	-0.650335
00000010_2.tif	control	CF2805	dop1234	12.844	7.911	5.54182	2.93743	-2.60439	0	0.29777	0.874678	-0.775511
00000010_2.tif	control	CF2805	dop1234	11.745	8.37	5.54182	2.94307	-2.59875	0	0.29777	0.876358	-0.773831
00000010_2.tif	control	CF2805	dop1234	11.74	8.656	5.54182	2.71566	-2.82616	0	0.29777	0.808643	-0.841546
00000010_2.tif	control	CF2805	dop1234	11.807	9.245	5.54182	2.23278	-3.30904	0	0.29777	0.664855	-0.985334
00000010_2.tif	control	CF2805	dop1234	12.135	9.458	5.54182	1.85016	-3.69167	0	0.29777	0.550921	-1.09927
00000010_2.tif	control	CF2805	dop1234	12.156	9.375	5.54182	1.89684	-3.64498	0	0.29777	0.564823	-1.08537
00000010_2.tif	control	CF2805	dop1234	12.208	9.438	5.54182	1.81521	-3.72661	0	0.29777	0.540516	-1.10967
00000010_2.tif	control	CF2805	dop1234	12.328	9.167	5.54182	1.95616	-3.58567	0	0.29777	0.582485	-1.0677
00000010_2.tif	control	CF2805	dop1234	12.776	8.786	5.54182	2.10592	-3.4359	0	0.29777	0.627081	-1.02311
00000010_2.tif	control	CF2805	dop1234	12.839	8.672	5.54182	2.19738	-3.34444	0	0.29777	0.654314	-0.995875
00000010_2.tif	control	CF2805	dop1234	13.177	8.719	5.54182	2.08685	-3.45498	0	0.29777	0.6214	-1.02879
00000010_2.tif	control	CF2805	dop1234	13.677	8.677	5.54182	2.13092	-3.4109	0	0.29777	0.634524	-1.01566
00000010_2.tif	control	CF2805	dop1234	13.365	9.177	5.54182	1.61584	-3.92599	0	0.29777	0.481148	-1.16904
00000010_2.tif	control	CF2805	dop1234	13.615	9.083	5.54182	1.72043	-3.82139	0	0.29777	0.512293	-1.1379
00000010_2.tif	control	CF2805	dop1234	12.76	9.401	5.54182	1.53835	-4.00347	0	0.29777	0.458075	-1.19211
00000010_2.tif	control	CF2805	dop1234	12.068	9.729	5.54182	1.71749	-3.82433	0	0.29777	0.511417	-1.13877
00000010_2.tif	control	CF2805	dop1234	11.396	10.177	5.54182	2.1125	-3.42932	0	0.29777	0.62904	-1.02115
00000010_2.tif	control	CF2805	dop1234	11.484	10.182	5.54182	2.02697	-3.51486	0	0.29777	0.60357	-1.04662
00000010_2.tif	control	CF2805	dop1234	11.667	10.87	5.54182	1.75174	-3.79009	0	0.29777	0.521615	-1.12857
00000010_2.tif	control	CF2805	dop1234	12.177	10.323	5.54182	1.32573	-4.21609	0	0.29777	0.394763	-1.25543
00000010_2.tif	control	CF2805	dop1234	12.422	10.432	5.54182	1.05812	-4.4837	0	0.29777	0.315077	-1.33511
00000010_2.tif	control	CF2805	dop1234	12.526	10.661	5.54182	0.900579	-4.64125	0	0.29777	0.268165	-1.38202
00000010_2.tif	control	CF2805	dop1234	12.708	10.047	5.54182	1.02845	-4.51338	0	0.29777	0.306241	-1.34395
00000010_2.tif	control	CF2805	dop1234	12.87	10.203	5.54182	0.803822	-4.738	0	0.29777	0.239354	-1.41083
00000010_2.tif	control	CF2805	dop1234	13.062	9.818	5.54182	1.03668	-4.50515	0	0.29777	0.308692	-1.3415
00000010_2.tif	control	CF2805	dop1234	13.026	9.62	5.54182	1.2355	-4.30632	0	0.29777	0.367895	-1.28229
00000010_2.tif	control	CF2805	dop1234	13.073	9.536	5.54182	1.30226	-4.23957	0	0.29777	0.387773	-1.26242
00000010_2.tif	control	CF2805	dop1234	13.26	9.521	5.54182	1.28066	-4.26116	0	0.29777	0.381342	-1.26885
00000010_2.tif	control	CF2805	dop1234	13.391	9.74	5.54182	1.05232	-4.4895	0	0.29777	0.31335	-1.33684
00000010_2.tif	control	CF2805	dop1234	13.594	9.609	5.54182	1.19617	-4.34566	0	0.29777	0.356183	-1.29401
00000010_2.tif	control	CF2805	dop1234	13.323	10.188	5.54182	0.611271	-4.93055	0	0.29777	0.182018	-1.46817
00000010_2.tif	control	CF2805	dop1234	12.979	10.87	5.54182	0.444891	-5.09693	0	0.29777	0.132475	-1.51771
00000010_2.tif	control	CF2805	dop1234	12.385	11.146	5.54182	1.09103	-4.4508	0	0.29777	0.324875	-1.32531
00000010_2.tif	control	CF2805	dop1234	11.932	10.948	5.54182	1.49317	-4.04865	0	0.29777	0.444622	-1.20557
00000010_2.tif	control	CF2805	dop1234	12.302	11.417	5.54182	1.27822	-4.2636	0	0.29777	0.380616	-1.26957
00000010_2.tif	control	CF2805	dop1234	12.005	11.714	5.54182	1.68637	-3.85546	0	0.29777	0.502149	-1.14804
00000010_2.tif	control	CF2805	dop1234	12.635	11.719	5.54182	1.21279	-4.32904	0	0.29777	0.361132	-1.28906
00000010_2.tif	control	CF2805	dop1234	12.865	11.604	5.54182	0.981859	-4.55996	0	0.29777	0.292368	-1.35782
00000010_2.tif	control	CF2805	dop1234	12.849	11.854	5.54182	1.20435	-4.33747	0	0.29777	0.35862	-1.29157
00000010_2.tif	control	CF2805	dop1234	13.266	11.401	5.54182	0.627441	-4.91438	0	0.29777	0.186833	-1.46336
00000010_2.tif	control	CF2805	dop1234	13.552	11.823	5.54182	1.0398	-4.50202	0	0.29777	0.309622	-1.34057
00000010_2.tif	control	CF2805	dop1234	13.057	12.229	5.54182	1.48141	-4.06042	0	0.29777	0.441119	-1.20907
00000010_2.tif	control	CF2805	dop1234	13.161	12.318	5.54182	1.54732	-3.9945	0	0.29777	0.460747	-1.18944
00000010_2.tif	control	CF2805	dop1234	13.333	12.37	5.54182	1.58023	-3.96159	0	0.29777	0.470546	-1.17964
00000010_2.tif	control	CF2805	dop1234	11.406	12.177	5.54182	2.44179	-3.10003	0	0.29777	0.727092	-0.923097
00000010_2.tif	control	CF2805	dop1234	11.651	12.375	5.54182	2.37163	-3.17019	0	0.29777	0.706201	-0.943988
00000010_2.tif	control	CF2805	dop1234	11.885	12.104	5.54182	2.01702	-3.5248	0	0.29777	0.600608	-1.04958
00000010_2.tif	control	CF2805	dop1234	11.917	12.578	5.54182	2.33234	-3.20949	0	0.29777	0.6945	-0.955689
00000010_2.tif	control	CF2805	dop1234	12.104	12.255	5.54182	1.96579	-3.57603	0	0.29777	0.585354	-1.06484
00000010_2.tif	control	CF2805	dop1234	12.203	12.25	5.54182	1.89725	-3.64457	0	0.29777	0.564944	-1.08524
00000010_2.tif	control	CF2805	dop1234	11.599	12.75	5.54182	2.67187	-2.86995	0	0.29777	0.795603	-0.854586
00000010_2.tif	control	CF2805	dop1234	12.76	12.792	5.54182	2.10515	-3.43668	0	0.29777	0.62685	-1.02334
00000010_2.tif	control	CF2805	dop1234	13.318	12.771	5.54182	1.98147	-3.56035	0	0.29777	0.590024	-1.06017
00000010_2.tif	control	CF2805	dop1234	13.484	12.854	5.54182	2.06309	-3.47874	0	0.29777	0.614326	-1.03586
00000010_2.tif	control	CF2805	dop1234	13.323	13.307	5.54182	2.51676	-3.02507	0	0.29777	0.749414	-0.900774
00000010_2.tif	control	CF2805	dop1234	13.396	13.458	5.54182	2.66608	-2.87574	0	0.29777	0.793879	-0.856309
00000010_2.tif	control	CF2805	dop1234	13.536	13.922	5.54182	3.13226	-2.40956	0	0.29777	0.932693	-0.717495
00000010_2.tif	control	CF2805	dop1234	11.359	21.026	5.54182	10.4389	4.89705	1	0.29777	3.10838	1.4582
00000010_2.tif	control	CF2805	dop1234	14.969	16.865	5.54182	6.26818	0.726352	1	0.29777	1.86647	0.216286
00000010_2.tif	control	CF2805	dop1234	14.812	16.88	5.54182	6.24578	0.703956	1	0.29777	1.85981	0.209617
00000010_2.tif	control	CF2805	dop1234	14.464	16.141	5.54182	5.45051	-0.0913183	0	0.29777	1.623	-0.0271919
00000010_2.tif	control	CF2805	dop1234	14.427	16.026	5.54182	5.33056	-0.211265	0	0.29777	1.58728	-0.0629084
00000010_2.tif	control	CF2805	dop1234	14.667	16.099	5.54182	5.45222	-0.0895996	0	0.29777	1.62351	-0.0266801
00000010_2.tif	control	CF2805	dop1234	14.031	14.406	5.54182	3.66579	-1.87604	0	0.29777	1.09156	-0.558628
00000010_2.tif	control	CF2805	dop1234	14.005	14.333	5.54182	3.58949	-1.95234	0	0.29777	1.06884	-0.581347
00000010_2.tif	control	CF2805	dop1234	14.047	13.896	5.54182	3.16729	-2.37454	0	0.29777	0.943123	-0.707065
00000010_2.tif	control	CF2805	dop1234	15.37	13.557	5.54182	3.38518	-2.15665	0	0.29777	1.008	-0.642184
00000010_2.tif	control	CF2805	dop1234	14.74	13.635	5.54182	3.13576	-2.40607	0	0.29777	0.933735	-0.716454
00000010_2.tif	control	CF2805	dop1234	13.938	12.74	5.54182	2.01647	-3.52536	0	0.29777	0.600444	-1.04975
00000010_2.tif	control	CF2805	dop1234	14.068	12.724	5.54182	2.03873	-3.50309	0	0.29777	0.607073	-1.04312
00000010_2.tif	control	CF2805	dop1234	14.578	12.698	5.54182	2.23176	-3.31006	0	0.29777	0.664551	-0.985637
00000010_2.tif	control	CF2805	dop1234	14.812	12.562	5.54182	2.25365	-3.28818	0	0.29777	0.671068	-0.97912
00000010_2.tif	control	CF2805	dop1234	15.089	12.302	5.54182	2.25293	-3.2889	0	0.29777	0.670854	-0.979335
00000010_2.tif	control	CF2805	dop1234	15.016	12.161	5.54182	2.10499	-3.43684	0	0.29777	0.626801	-1.02339
00000010_2.tif	control	CF2805	dop1234	15.083	11.995	5.54182	2.05494	-3.48689	0	0.29777	0.611899	-1.03829
00000010_2.tif	control	CF2805	dop1234	15.578	12.323	5.54182	2.64837	-2.89345	0	0.29777	0.788606	-0.861583
00000010_2.tif	control	CF2805	dop1234	15.589	12.562	5.54182	2.80187	-2.73995	0	0.29777	0.834313	-0.815876
00000010_2.tif	control	CF2805	dop1234	14.672	11.938	5.54182	1.69951	-3.84231	0	0.29777	0.506064	-1.14413
00000010_2.tif	control	CF2805	dop1234	14.818	11.469	5.54182	1.556	-3.98583	0	0.29777	0.46333	-1.18686
00000010_2.tif	control	CF2805	dop1234	15.036	11.583	5.54182	1.8019	-3.73992	0	0.29777	0.536552	-1.11364
00000010_2.tif	control	CF2805	dop1234	15.453	11.292	5.54182	2.0965	-3.44533	0	0.29777	0.624274	-1.02592
00000010_2.tif	control	CF2805	dop1234	14.557	11.156	5.54182	1.1967	-4.34512	0	0.29777	0.356342	-1.29385
00000010_2.tif	control	CF2805	dop1234	14.37	10.625	5.54182	0.967522	-4.5743	0	0.29777	0.288099	-1.36209
00000010_2.tif	control	CF2805	dop1234	14.583	10.562	5.54182	1.18847	-4.35336	0	0.29777	0.35389	-1.2963
00000010_2.tif	control	CF2805	dop1234	14.75	10.922	5.54182	1.33932	-4.2025	0	0.29777	0.398811	-1.25138
00000010_2.tif	control	CF2805	dop1234	14.849	10.927	5.54182	1.43835	-4.10347	0	0.29777	0.428297	-1.22189
00000010_2.tif	control	CF2805	dop1234	14.87	10.557	5.54182	1.47188	-4.06994	0	0.29777	0.438282	-1.21191
00000010_2.tif	control	CF2805	dop1234	15.021	10.849	5.54182	1.60501	-3.93681	0	0.29777	0.477925	-1.17226
00000010_2.tif	control	CF2805	dop1234	15.073	10.734	5.54182	1.65702	-3.88481	0	0.29777	0.493409	-1.15678
00000010_2.tif	control	CF2805	dop1234	15.344	10.745	5.54182	1.92757	-3.61425	0	0.29777	0.573973	-1.07622
00000010_2.tif	control	CF2805	dop1234	15.344	10.62	5.54182	1.93466	-3.60716	0	0.29777	0.576084	-1.0741
00000010_2.tif	control	CF2805	dop1234	14.328	9.786	5.54182	1.35719	-4.18464	0	0.29777	0.40413	-1.24606
00000010_2.tif	control	CF2805	dop1234	14.943	10.042	5.54182	1.70035	-3.84148	0	0.29777	0.506312	-1.14388
00000010_2.tif	control	CF2805	dop1234	15.042	10.177	5.54182	1.73748	-3.80434	0	0.29777	0.517371	-1.13282
00000010_2.tif	control	CF2805	dop1234	15.109	10.115	5.54182	1.82241	-3.71941	0	0.29777	0.54266	-1.10753
00000010_2.tif	control	CF2805	dop1234	15.193	10.151	5.54182	1.88814	-3.65369	0	0.29777	0.56223	-1.08796
00000010_2.tif	control	CF2805	dop1234	15.245	10.078	5.54182	1.96249	-3.57933	0	0.29777	0.584372	-1.06582
00000010_2.tif	control	CF2805	dop1234	15.26	10.281	5.54182	1.91253	-3.62929	0	0.29777	0.569494	-1.08069
00000010_2.tif	control	CF2805	dop1234	15.026	9.76	5.54182	1.91152	-3.6303	0	0.29777	0.569193	-1.081
00000010_2.tif	control	CF2805	dop1234	15.016	9.448	5.54182	2.08881	-3.45301	0	0.29777	0.621986	-1.0282
00000010_2.tif	control	CF2805	dop1234	14.745	9.542	5.54182	1.82376	-3.71807	0	0.29777	0.54306	-1.10713
00000010_2.tif	control	CF2805	dop1234	14.698	9.37	5.54182	1.91391	-3.62792	0	0.29777	0.569904	-1.08028
00000010_2.tif	control	CF2805	dop1234	14.536	9.177	5.54182	1.96479	-3.57704	0	0.29777	0.585054	-1.06513
00000010_2.tif	control	CF2805	dop1234	15.422	9.318	5.54182	2.48851	-3.05331	0	0.29777	0.741005	-0.909184
00000010_2.tif	control	CF2805	dop1234	15.406	9.125	5.54182	2.59519	-2.94663	0	0.29777	0.77277	-0.877419
00000010_2.tif	control	CF2805	dop1234	15.349	8.542	5.54182	2.96566	-2.57617	0	0.29777	0.883084	-0.767105
00000010_2.tif	control	CF2805	dop1234	15.057	8.464	5.54182	2.84766	-2.69416	0	0.29777	0.847949	-0.80224
00000010_2.tif	control	CF2805	dop1234	14.906	8.661	5.54182	2.59967	-2.94215	0	0.29777	0.774104	-0.876085
00000010_2.tif	control	CF2805	dop1234	14.792	8.557	5.54182	2.62409	-2.91773	0	0.29777	0.781375	-0.868814
00000010_2.tif	control	CF2805	dop1234	14.219	8.391	5.54182	2.5314	-3.01042	0	0.29777	0.753776	-0.896413
00000010_2.tif	control	CF2805	dop1234	14.135	8.068	5.54182	2.81704	-2.72479	0	0.29777	0.838829	-0.81136
00000010_2.tif	control	CF2805	dop1234	14.12	7.953	5.54182	2.92474	-2.61708	0	0.29777	0.870901	-0.779288
00000010_2.tif	control	CF2805	dop1234	14.036	7.552	5.54182	3.2986	-2.24322	0	0.29777	0.982224	-0.667965
00000010_2.tif	control	CF2805	dop1234	14.599	7.906	5.54182	3.11867	-2.42315	0	0.29777	0.928647	-0.721542
00000010_2.tif	control	CF2805	dop1234	14.786	7.781	5.54182	3.30761	-2.23421	0	0.29777	0.984907	-0.665282
00000010_2.tif	control	CF2805	dop1234	15.344	7.385	5.54182	3.9142	-1.62762	0	0.29777	1.16553	-0.484657
00000010_2.tif	control	CF2805	dop1234	14.849	7.094	5.54182	3.96558	-1.57624	0	0.29777	1.18083	-0.469358
00000010_2.tif	control	CF2805	dop1234	14.359	7.135	5.54182	3.77638	-1.76545	0	0.29777	1.12449	-0.525697
00000010_2.tif	control	CF2805	dop1234	14.198	6.302	5.54182	4.55742	-0.984406	0	0.29777	1.35706	-0.293126
00000010_2.tif	control	CF2805	dop1234	14.339	6.589	5.54182	4.30294	-1.23888	0	0.29777	1.28129	-0.368902
00000010_2.tif	control	CF2805	dop1234	14.76	6.734	5.54182	4.27446	-1.26736	0	0.29777	1.27281	-0.377383
00000010_2.tif	control	CF2805	dop1234	15.161	6.62	5.54182	4.52185	-1.01997	0	0.29777	1.34647	-0.303718
00000010_2.tif	control	CF2805	dop1234	15.078	6.599	5.54182	4.51001	-1.03182	0	0.29777	1.34295	-0.307244
00000010_2.tif	control	CF2805	dop1234	15.312	6.599	5.54182	4.60133	-0.94049	0	0.29777	1.37014	-0.28005
00000010_2.tif	control	CF2805	dop1234	14.51	4.281	5.54182	6.6021	1.06028	1	0.29777	1.96591	0.315719
00000010_2.tif	control	CF2805	dop1234	14.536	4.167	5.54182	6.71884	1.17701	1	0.29777	2.00067	0.35048
00000010_2.tif	control	CF2805	dop1234	15.698	8.156	5.54182	3.48589	-2.05593	0	0.29777	1.03799	-0.612194
00000010_2.tif	control	CF2805	dop1234	17.604	8.365	5.54182	4.83956	-0.702268	0	0.29777	1.44107	-0.209114
00000010_2.tif	control	CF2805	dop1234	17.458	9.042	5.54182	4.40366	-1.13817	0	0.29777	1.31128	-0.338912
00000010_2.tif	control	CF2805	dop1234	17.839	8.969	5.54182	4.78303	-0.75879	0	0.29777	1.42424	-0.225945
00000010_2.tif	control	CF2805	dop1234	18.818	9.469	5.54182	5.56068	0.0188533	1	0.29777	1.6558	0.00561395
00000010_2.tif	control	CF2805	dop1234	16.63	9.307	5.54182	3.53958	-2.00225	0	0.29777	1.05398	-0.59621
00000010_2.tif	control	CF2805	dop1234	16.505	9.562	5.54182	3.32395	-2.21787	0	0.29777	0.989773	-0.660416
00000010_2.tif	control	CF2805	dop1234	17.568	10.781	5.54182	4.15101	-1.39081	0	0.29777	1.23605	-0.414141
00000010_2.tif	control	CF2805	dop1234	17.5	10.891	5.54182	4.0842	-1.45762	0	0.29777	1.21615	-0.434037
00000010_2.tif	control	CF2805	dop1234	16.75	10.771	5.54182	3.33307	-2.20876	0	0.29777	0.992487	-0.657702
00000010_2.tif	control	CF2805	dop1234	15.771	11.271	5.54182	2.40224	-3.13958	0	0.29777	0.715315	-0.934874
00000010_2.tif	control	CF2805	dop1234	15.771	11.469	5.54182	2.44942	-3.09241	0	0.29777	0.729363	-0.920826
00000010_2.tif	control	CF2805	dop1234	15.703	11.677	5.54182	2.45133	-3.09049	0	0.29777	0.729933	-0.920256
00000010_2.tif	control	CF2805	dop1234	16.135	11.526	5.54182	2.81536	-2.72646	0	0.29777	0.838331	-0.811858
00000010_2.tif	control	CF2805	dop1234	16.385	11.635	5.54182	3.0854	-2.45643	0	0.29777	0.918739	-0.73145
00000010_2.tif	control	CF2805	dop1234	16.641	11.979	5.54182	3.43557	-2.10625	0	0.29777	1.02301	-0.627179
00000010_2.tif	control	CF2805	dop1234	16.828	11.865	5.54182	3.57579	-1.96604	0	0.29777	1.06476	-0.585427
00000010_2.tif	control	CF2805	dop1234	17.12	11.99	5.54182	3.89197	-1.64986	0	0.29777	1.15891	-0.491278
00000010_2.tif	control	CF2805	dop1234	16.318	12.099	5.54182	3.18183	-2.35999	0	0.29777	0.947454	-0.702735
00000010_2.tif	control	CF2805	dop1234	16.339	12.224	5.54182	3.25403	-2.28779	0	0.29777	0.968952	-0.681237
00000010_2.tif	control	CF2805	dop1234	17.589	12.479	5.54182	4.50017	-1.04165	0	0.29777	1.34002	-0.310172
00000010_2.tif	control	CF2805	dop1234	16.818	12.526	5.54182	3.81753	-1.72429	0	0.29777	1.13675	-0.513442
00000010_2.tif	control	CF2805	dop1234	16.781	12.667	5.54182	3.85125	-1.69057	0	0.29777	1.14679	-0.503402
00000010_2.tif	control	CF2805	dop1234	15.682	13.057	5.54182	3.20319	-2.33863	0	0.29777	0.953815	-0.696374
00000010_2.tif	control	CF2805	dop1234	15.75	13.047	5.54182	3.24467	-2.29715	0	0.29777	0.966167	-0.684022
00000010_2.tif	control	CF2805	dop1234	15.984	13.573	5.54182	3.78463	-1.75719	0	0.29777	1.12695	-0.523239
00000010_2.tif	control	CF2805	dop1234	17.578	13.13	5.54182	4.77286	-0.768967	0	0.29777	1.42121	-0.228975
00000010_2.tif	control	CF2805	dop1234	15.781	15.667	5.54182	5.41794	-0.123879	0	0.29777	1.6133	-0.0368876
00000010_2.tif	control	CF2805	dop1234	15.792	16.083	5.54182	5.7996	0.257772	1	0.29777	1.72695	0.0767566
0000010_16.tif	predator	LX703	dop3	6.401	7.281	5.78653	8.95601	3.16948	1	0.29777	2.66683	0.943776
0000010_16.tif	predator	LX703	dop3	6.281	7.578	5.78653	8.90385	3.11731	1	0.29777	2.6513	0.928242
0000010_16.tif	predator	LX703	dop3	6.151	7.5	5.78653	9.05544	3.26891	1	0.29777	2.69644	0.973383
0000010_16.tif	predator	LX703	dop3	6.49	8.26	5.78653	8.39272	2.60619	1	0.29777	2.4991	0.776045
0000010_16.tif	predator	LX703	dop3	4.911	9.641	5.78653	9.37527	3.58874	1	0.29777	2.79168	1.06862
0000010_16.tif	predator	LX703	dop3	4.995	9.844	5.78653	9.24304	3.4565	1	0.29777	2.7523	1.02924
0000010_16.tif	predator	LX703	dop3	4.234	10.031	5.78653	9.94299	4.15646	1	0.29777	2.96073	1.23767
0000010_16.tif	predator	LX703	dop3	5.156	11.542	5.78653	8.82429	3.03776	1	0.29777	2.62761	0.904554
0000010_16.tif	predator	LX703	dop3	4.656	12.557	5.78653	9.32032	3.53378	1	0.29777	2.77531	1.05225
0000010_16.tif	predator	LX703	dop3	5.938	12.474	5.78653	8.03576	2.24923	1	0.29777	2.39281	0.669753
0000010_16.tif	predator	LX703	dop3	5.807	15.328	5.78653	8.78061	2.99408	1	0.29777	2.6146	0.891547
0000010_16.tif	predator	LX703	dop3	5.859	15.516	5.78653	8.80403	3.01749	1	0.29777	2.62157	0.898519
0000010_16.tif	predator	LX703	dop3	6.901	17.349	5.78653	8.81303	3.02649	1	0.29777	2.62425	0.901198
0000010_16.tif	predator	LX703	dop3	7.031	17.453	5.78653	8.77252	2.98599	1	0.29777	2.61219	0.889137
0000010_16.tif	predator	LX703	dop3	7.583	16.802	5.78653	7.93935	2.15282	1	0.29777	2.3641	0.641045
0000010_16.tif	predator	LX703	dop3	6.635	14.297	5.78653	7.65756	1.87102	1	0.29777	2.28019	0.557135
0000010_16.tif	predator	LX703	dop3	10.26	14.828	5.78653	4.61325	-1.17328	0	0.29777	1.37369	-0.349367
0000010_16.tif	predator	LX703	dop3	10.318	14.755	5.78653	4.52323	-1.2633	0	0.29777	1.34688	-0.376173
0000010_16.tif	predator	LX703	dop3	7.198	12.464	5.78653	6.777	0.990468	1	0.29777	2.01799	0.294932
0000010_16.tif	predator	LX703	dop3	8.714	11.125	5.78653	5.3358	-0.450739	0	0.29777	1.58884	-0.134216
0000010_16.tif	predator	LX703	dop3	9.057	11.167	5.78653	4.99085	-0.795685	0	0.29777	1.48612	-0.236931
0000010_16.tif	predator	LX703	dop3	9.036	9.099	5.78653	5.75844	-0.0280942	0	0.29777	1.71469	-0.00836561
0000010_16.tif	predator	LX703	dop3	7.552	8.542	5.78653	7.32237	1.53583	1	0.29777	2.18038	0.457325
0000010_16.tif	predator	LX703	dop3	6.682	8.229	5.78653	8.23665	2.45011	1	0.29777	2.45263	0.72957
0000010_16.tif	predator	LX703	dop3	8.224	8.167	5.78653	6.94576	1.15922	1	0.29777	2.06824	0.345182
0000010_16.tif	predator	LX703	dop3	10.458	2.87	5.78653	9.85288	4.06635	1	0.29777	2.93389	1.21084
0000010_16.tif	predator	LX703	dop3	10.495	2.797	5.78653	9.90812	4.12159	1	0.29777	2.95034	1.22729
0000010_16.tif	predator	LX703	dop3	10.656	2.651	5.78653	9.99056	4.20402	1	0.29777	2.97489	1.25183
0000010_16.tif	predator	LX703	dop3	8.865	2.37	5.78653	10.9656	5.1791	1	0.29777	3.26524	1.54218
0000010_16.tif	predator	LX703	dop3	12.458	2.104	5.78653	10.0871	4.30052	1	0.29777	3.00362	1.28057
0000010_16.tif	predator	LX703	dop3	12.526	1.99	5.78653	10.19	4.40344	1	0.29777	3.03427	1.31121
0000010_16.tif	predator	LX703	dop3	12.583	2.229	5.78653	9.94535	4.15882	1	0.29777	2.96143	1.23837
0000010_16.tif	predator	LX703	dop3	12.734	2.229	5.78653	9.92551	4.13897	1	0.29777	2.95552	1.23246
0000010_16.tif	predator	LX703	dop3	12.776	2.125	5.78653	10.0236	4.23712	1	0.29777	2.98474	1.26169
0000010_16.tif	predator	LX703	dop3	11.573	2.896	5.78653	9.4882	3.70167	1	0.29777	2.8253	1.10225
0000010_16.tif	predator	LX703	dop3	11.094	2.875	5.78653	9.64013	3.8536	1	0.29777	2.87054	1.14749
0000010_16.tif	predator	LX703	dop3	11.135	3.167	5.78653	9.34929	3.56275	1	0.29777	2.78394	1.06088
0000010_16.tif	predator	LX703	dop3	10.812	5.505	5.78653	7.28968	1.50315	1	0.29777	2.17065	0.447592
0000010_16.tif	predator	LX703	dop3	11.344	6.375	5.78653	6.27603	0.489501	1	0.29777	1.86881	0.145759
0000010_16.tif	predator	LX703	dop3	13.208	6.474	5.78653	5.65476	-0.13177	0	0.29777	1.68382	-0.0392372
0000010_16.tif	predator	LX703	dop3	13.219	7.047	5.78653	5.08586	-0.700672	0	0.29777	1.51442	-0.208639
0000010_16.tif	predator	LX703	dop3	13.109	7.104	5.78653	5.04695	-0.739584	0	0.29777	1.50283	-0.220226
0000010_16.tif	predator	LX703	dop3	12.354	7.234	5.78653	5.10455	-0.681983	0	0.29777	1.51998	-0.203074
0000010_16.tif	predator	LX703	dop3	11.672	7.099	5.78653	5.48121	-0.30532	0	0.29777	1.63214	-0.0909151
0000010_16.tif	predator	LX703	dop3	13.255	7.839	5.78653	4.29788	-1.48865	0	0.29777	1.27978	-0.443275
0000010_16.tif	predator	LX703	dop3	11.844	12.594	5.78653	2.18189	-3.60464	0	0.29777	0.649702	-1.07335
0000010_16.tif	predator	LX703	dop3	12.646	13.76	5.78653	2.13688	-3.64966	0	0.29777	0.636298	-1.08676
0000010_16.tif	predator	LX703	dop3	12.323	15.016	5.78653	3.36522	-2.42131	0	0.29777	1.00206	-0.720994
0000010_16.tif	predator	LX703	dop3	12.255	16.198	5.78653	4.46039	-1.32614	0	0.29777	1.32817	-0.394886
0000010_16.tif	predator	LX703	dop3	11.312	18.693	5.78653	7.1268	1.34027	1	0.29777	2.12215	0.399092
0000010_16.tif	predator	LX703	dop3	11.427	18.635	5.78653	7.03069	1.24416	1	0.29777	2.09353	0.370473
0000010_16.tif	predator	LX703	dop3	12.969	19.818	5.78653	7.80369	2.01716	1	0.29777	2.32371	0.60065
0000010_16.tif	predator	LX703	dop3	12.927	19.307	5.78653	7.303	1.51647	1	0.29777	2.17461	0.451558
0000010_16.tif	predator	LX703	dop3	15.052	20.042	5.78653	8.03797	2.25144	1	0.29777	2.39347	0.670412
0000010_16.tif	predator	LX703	dop3	14.969	19.698	5.78653	7.68599	1.89946	1	0.29777	2.28866	0.565601
0000010_16.tif	predator	LX703	dop3	14.823	19.615	5.78653	7.58579	1.79926	1	0.29777	2.25882	0.535765
0000010_16.tif	predator	LX703	dop3	14.755	19.542	5.78653	7.5058	1.71926	1	0.29777	2.235	0.511945
0000010_16.tif	predator	LX703	dop3	15.87	17.49	5.78653	5.73782	-0.0487135	0	0.29777	1.70855	-0.0145054
0000010_16.tif	predator	LX703	dop3	15.823	17.031	5.78653	5.29038	-0.496157	0	0.29777	1.57532	-0.147741
0000010_16.tif	predator	LX703	dop3	13.49	6.828	5.78653	5.27135	-0.515179	0	0.29777	1.56965	-0.153405
0000010_16.tif	predator	LX703	dop3	13.927	5.099	5.78653	6.9791	1.19256	1	0.29777	2.07817	0.35511
0000010_16.tif	predator	LX703	dop3	14.068	5.141	5.78653	6.93778	1.15125	1	0.29777	2.06586	0.342806
0000010_16.tif	predator	LX703	dop3	13.583	4.099	5.78653	7.98809	2.20156	1	0.29777	2.37861	0.655558
0000010_16.tif	predator	LX703	dop3	13.906	3.464	5.78653	8.6142	2.82766	1	0.29777	2.56505	0.841993
0000010_16.tif	predator	LX703	dop3	14.859	2.656	5.78653	9.46441	3.67788	1	0.29777	2.81822	1.09516
0000010_16.tif	predator	LX703	dop3	14.766	2.443	5.78653	9.66832	3.88179	1	0.29777	2.87894	1.15588
0000010_16.tif	predator	LX703	dop3	13.5	1.526	5.78653	10.5622	4.77566	1	0.29777	3.14511	1.42205
0000010_16.tif	predator	LX703	dop3	14.005	1.469	5.78653	10.6091	4.82255	1	0.29777	3.15907	1.43601
0000010_16.tif	predator	LX703	dop3	15.49	2.406	5.78653	9.79164	4.00511	1	0.29777	2.91566	1.1926
0000010_16.tif	predator	LX703	dop3	15.807	1.88	5.78653	10.3632	4.57666	1	0.29777	3.08585	1.36279
0000010_16.tif	predator	LX703	dop3	16.385	2.234	5.78653	10.1373	4.3508	1	0.29777	3.01859	1.29554
0000010_16.tif	predator	LX703	dop3	16.547	2.188	5.78653	10.2217	4.43521	1	0.29777	3.04373	1.32067
0000010_16.tif	predator	LX703	dop3	17.802	2.12	5.78653	10.672	4.88549	1	0.29777	3.17781	1.45475
0000010_16.tif	predator	LX703	dop3	17.51	2.62	5.78653	10.1009	4.31435	1	0.29777	3.00774	1.28468
0000010_16.tif	predator	LX703	dop3	18.203	2.651	5.78653	10.3362	4.54969	1	0.29777	3.07782	1.35476
0000010_16.tif	predator	LX703	dop3	18.312	2.641	5.78653	10.3905	4.60395	1	0.29777	3.09397	1.37092
0000010_16.tif	predator	LX703	dop3	18.172	2.776	5.78653	10.2095	4.42299	1	0.29777	3.04009	1.31704
0000010_16.tif	predator	LX703	dop3	19.828	4.74	5.78653	9.39323	3.60669	1	0.29777	2.79702	1.07397
0000010_16.tif	predator	LX703	dop3	17.74	5.818	5.78653	7.31066	1.52413	1	0.29777	2.1769	0.45384
0000010_16.tif	predator	LX703	dop3	20.734	14.161	5.78653	7.0832	1.29667	1	0.29777	2.10917	0.38611
0000010_16.tif	predator	LX703	dop3	21.708	12.422	5.78653	7.75164	1.9651	1	0.29777	2.3082	0.585149
0000010_16.tif	predator	LX703	dop3	21.427	11.969	5.78653	7.4638	1.67726	1	0.29777	2.22249	0.499438
0000010_16.tif	predator	LX703	dop3	21.396	11.833	5.78653	7.43604	1.6495	1	0.29777	2.21423	0.491173
0000010_16.tif	predator	LX703	dop3	22.01	11.87	5.78653	8.04869	2.26215	1	0.29777	2.39666	0.673602
0000010_16.tif	predator	LX703	dop3	21.917	11.734	5.78653	7.96044	2.1739	1	0.29777	2.37038	0.647323
0000010_16.tif	predator	LX703	dop3	22.042	10.318	5.78653	8.26751	2.48097	1	0.29777	2.46182	0.73876
0000010_16.tif	predator	LX703	dop3	20.932	8.307	5.78653	7.92297	2.13644	1	0.29777	2.35922	0.636167
0000010_16.tif	predator	LX703	dop3	21.365	8.698	5.78653	8.13629	2.34976	1	0.29777	2.42274	0.699687
0000010_16.tif	predator	LX703	dop3	22.812	8.906	5.78653	9.3994	3.61286	1	0.29777	2.79886	1.0758
0000010_16.tif	predator	LX703	dop3	23.453	8.286	5.78653	10.2186	4.4321	1	0.29777	3.0428	1.31975
0000010_16.tif	predator	LX703	dop3	23.385	7.656	5.78653	10.4072	4.62064	1	0.29777	3.09894	1.37589
0000010_16.tif	predator	LX703	dop3	23.188	7.516	5.78653	10.2905	4.50395	1	0.29777	3.0642	1.34114
0000010_16.tif	predator	LX703	dop3	21.583	7.245	5.78653	9.02259	3.23605	1	0.29777	2.68666	0.963599
0000010_16.tif	predator	LX703	dop3	20.255	6.948	5.78653	8.11749	2.33095	1	0.29777	2.41714	0.694088
0000010_16.tif	predator	LX703	dop3	20.839	6.682	5.78653	8.7397	2.95317	1	0.29777	2.60242	0.879366
0000010_16.tif	predator	LX703	dop3	20.87	5.719	5.78653	9.38774	3.60121	1	0.29777	2.79539	1.07233
0000010_16.tif	predator	LX703	dop3	21.755	5.422	5.78653	10.247	4.46052	1	0.29777	3.05126	1.32821
0000010_16.tif	predator	LX703	dop3	21.719	6.099	5.78653	9.79227	4.00573	1	0.29777	2.91584	1.19279
0000010_16.tif	predator	LX703	dop3	20.094	4.568	5.78653	9.69417	3.90764	1	0.29777	2.88663	1.16358
0000010_16.tif	predator	LX703	dop3	23.696	8.613	5.78653	10.3304	4.54391	1	0.29777	3.0761	1.35304
0000010_16.tif	predator	LX703	dop3	23.578	9.252	5.78653	10.0207	4.23421	1	0.29777	2.98388	1.26082
0000010_16.tif	predator	LX703	dop3	23.703	9.377	5.78653	10.1066	4.32007	1	0.29777	3.00944	1.28639
0000010_16.tif	predator	LX703	dop3	23.613	9.578	5.78653	9.96761	4.18107	1	0.29777	2.96805	1.245
0000010_24.tif	predator	RB1254	dop4	7.552	10.51	5.27621	8.18089	2.90467	1	0.29777	2.43602	0.864924
0000010_24.tif	predator	RB1254	dop4	6.547	11.562	5.27621	9.06183	3.78562	1	0.29777	2.69834	1.12724
0000010_24.tif	predator	RB1254	dop4	5.891	14.672	5.27621	10.0733	4.79705	1	0.29777	2.99952	1.42842
0000010_24.tif	predator	RB1254	dop4	5.859	14.88	5.27621	10.1614	4.8852	1	0.29777	3.02577	1.45467
0000010_24.tif	predator	RB1254	dop4	7.51	14.896	5.27621	8.59719	3.32098	1	0.29777	2.55999	0.988887
0000010_24.tif	predator	RB1254	dop4	7.995	18.88	5.27621	10.2653	4.98905	1	0.29777	3.05669	1.48559
0000010_24.tif	predator	RB1254	dop4	8.217	18.783	5.27621	10.036	4.75974	1	0.29777	2.98841	1.41731
0000010_24.tif	predator	RB1254	dop4	8.953	16.998	5.27621	8.32523	3.04902	1	0.29777	2.479	0.907907
0000010_24.tif	predator	RB1254	dop4	9.28	16.727	5.27621	7.901	2.62479	1	0.29777	2.35268	0.781583
0000010_24.tif	predator	RB1254	dop4	8.62	14.429	5.27621	7.39489	2.11868	1	0.29777	2.20198	0.63088
0000010_24.tif	predator	RB1254	dop4	8.925	14.109	5.27621	7.00413	1.72792	1	0.29777	2.08562	0.514523
0000010_24.tif	predator	RB1254	dop4	8.967	13.97	5.27621	6.92298	1.64676	1	0.29777	2.06146	0.490357
0000010_24.tif	predator	RB1254	dop4	10.064	14.422	5.27621	6.04815	0.771933	1	0.29777	1.80096	0.229858
0000010_24.tif	predator	RB1254	dop4	10.342	14.255	5.27621	5.72656	0.450347	1	0.29777	1.7052	0.1341
0000010_24.tif	predator	RB1254	dop4	11.432	11.776	5.27621	4.17219	-1.10403	0	0.29777	1.24235	-0.328746
0000010_24.tif	predator	RB1254	dop4	11.641	11.561	5.27621	3.98054	-1.29567	0	0.29777	1.18529	-0.385813
0000010_24.tif	predator	RB1254	dop4	11.509	11.047	5.27621	4.19596	-1.08025	0	0.29777	1.24943	-0.321667
0000010_24.tif	predator	RB1254	dop4	9.981	8.929	5.27621	6.39492	1.1187	1	0.29777	1.90421	0.333116
0000010_24.tif	predator	RB1254	dop4	9.668	8.262	5.27621	7.00215	1.72593	1	0.29777	2.08503	0.513931
0000010_24.tif	predator	RB1254	dop4	9.335	8.227	5.27621	7.3043	2.02808	1	0.29777	2.175	0.603902
0000010_24.tif	predator	RB1254	dop4	7.849	5.623	5.27621	10.0262	4.74999	1	0.29777	2.9855	1.41441
0000010_24.tif	predator	RB1254	dop4	9.78	5.72	5.27621	8.54976	3.27355	1	0.29777	2.54586	0.974765
0000010_24.tif	predator	RB1254	dop4	10.62	5.429	5.27621	8.23155	2.95534	1	0.29777	2.45111	0.880011
0000010_24.tif	predator	RB1254	dop4	11.564	5.602	5.27621	7.55057	2.27436	1	0.29777	2.24833	0.677236
0000010_24.tif	predator	RB1254	dop4	9.925	3.675	5.27621	10.0615	4.78529	1	0.29777	2.99601	1.42491
0000010_24.tif	predator	RB1254	dop4	9.696	2.856	5.27621	10.8704	5.5942	1	0.29777	3.23688	1.66578
0000010_24.tif	predator	RB1254	dop4	9.092	2.766	5.27621	11.2833	6.00707	1	0.29777	3.35982	1.78873
0000010_24.tif	predator	RB1254	dop4	11.036	3.398	5.27621	9.72319	4.44697	1	0.29777	2.89527	1.32418
0000010_24.tif	predator	RB1254	dop4	12.474	2.898	5.27621	9.60838	4.33217	1	0.29777	2.86109	1.28999
0000010_24.tif	predator	RB1254	dop4	12.467	3.141	5.27621	9.38126	4.10505	1	0.29777	2.79346	1.22236
0000010_24.tif	predator	RB1254	dop4	13.932	2.405	5.27621	9.72297	4.44676	1	0.29777	2.89521	1.32411
0000010_24.tif	predator	RB1254	dop4	14.668	2.384	5.27621	9.64504	4.36882	1	0.29777	2.872	1.3009
0000010_24.tif	predator	RB1254	dop4	13.238	3.356	5.27621	8.94521	3.66899	1	0.29777	2.66361	1.09252
0000010_24.tif	predator	RB1254	dop4	13.481	3.592	5.27621	8.65515	3.37893	1	0.29777	2.57724	1.00615
0000010_24.tif	predator	RB1254	dop4	12.231	4.661	5.27621	8.06038	2.78417	1	0.29777	2.40014	0.829042
0000010_24.tif	predator	RB1254	dop4	15.835	5.068	5.27621	6.92003	1.64381	1	0.29777	2.06058	0.489478
0000010_24.tif	predator	RB1254	dop4	12.467	5.575	5.27621	7.13335	1.85714	1	0.29777	2.1241	0.553
0000010_24.tif	predator	RB1254	dop4	11.974	5.679	5.27621	7.2728	1.99659	1	0.29777	2.16562	0.594524
0000010_24.tif	predator	RB1254	dop4	11.877	5.811	5.27621	7.20827	1.93206	1	0.29777	2.14641	0.57531
0000010_24.tif	predator	RB1254	dop4	12.453	6.457	5.27621	6.35964	1.08343	1	0.29777	1.89371	0.322613
0000010_24.tif	predator	RB1254	dop4	14.668	8.894	5.27621	3.22721	-2.04901	0	0.29777	0.960965	-0.610133
0000010_24.tif	predator	RB1254	dop4	13.314	12.137	5.27621	2.29012	-2.9861	0	0.29777	0.681928	-0.88917
0000010_24.tif	predator	RB1254	dop4	13.488	12.304	5.27621	2.13512	-3.1411	0	0.29777	0.635774	-0.935325
0000010_24.tif	predator	RB1254	dop4	12.849	12.637	5.27621	2.82647	-2.44975	0	0.29777	0.841637	-0.729461
0000010_24.tif	predator	RB1254	dop4	13.682	12.033	5.27621	1.91763	-3.35859	0	0.29777	0.571012	-1.00009
0000010_24.tif	predator	RB1254	dop4	11.842	13.283	5.27621	3.97523	-1.30098	0	0.29777	1.1837	-0.387394
0000010_24.tif	predator	RB1254	dop4	11.884	13.429	5.27621	3.98613	-1.29008	0	0.29777	1.18695	-0.384147
0000010_24.tif	predator	RB1254	dop4	14.918	12.644	5.27621	0.948346	-4.32787	0	0.29777	0.282389	-1.28871
0000010_24.tif	predator	RB1254	dop4	14.502	12.873	5.27621	1.412	-3.86422	0	0.29777	0.42045	-1.15065
0000010_24.tif	predator	RB1254	dop4	14.245	16.113	5.27621	4.34534	-0.930876	0	0.29777	1.29391	-0.277187
0000010_24.tif	predator	RB1254	dop4	14.175	16.252	5.27621	4.49929	-0.776925	0	0.29777	1.33975	-0.231345
0000010_24.tif	predator	RB1254	dop4	13.599	18.648	5.27621	6.95765	1.68144	1	0.29777	2.07178	0.500681
0000010_24.tif	predator	RB1254	dop4	14.418	18.925	5.27621	7.04076	1.76454	1	0.29777	2.09653	0.525428
0000010_24.tif	predator	RB1254	dop4	14.356	19.905	5.27621	8.01794	2.74172	1	0.29777	2.3875	0.816403
0000010_24.tif	predator	RB1254	dop4	13.023	19.8	5.27621	8.22956	2.95335	1	0.29777	2.45052	0.879418
0000010_24.tif	predator	RB1254	dop4	12.814	19.592	5.27621	8.10172	2.82551	1	0.29777	2.41245	0.841352
0000010_24.tif	predator	RB1254	dop4	18.37	20.398	5.27621	8.85855	3.58233	1	0.29777	2.63781	1.06671
0000010_24.tif	predator	RB1254	dop4	18.286	20.259	5.27621	8.70032	3.42411	1	0.29777	2.59069	1.0196
0000010_24.tif	predator	RB1254	dop4	17.981	18.911	5.27621	7.32511	2.0489	1	0.29777	2.1812	0.6101
0000010_24.tif	predator	RB1254	dop4	18.002	18.828	5.27621	7.2536	1.97739	1	0.29777	2.15991	0.588807
0000010_24.tif	predator	RB1254	dop4	18.085	18.259	5.27621	6.74951	1.47329	1	0.29777	2.0098	0.438702
0000010_24.tif	predator	RB1254	dop4	19.488	16.825	5.27621	6.20964	0.933424	1	0.29777	1.84904	0.277946
0000010_24.tif	predator	RB1254	dop4	19.391	16.686	5.27621	6.04054	0.764322	1	0.29777	1.79869	0.227592
0000010_24.tif	predator	RB1254	dop4	17.078	12.248	5.27621	1.50238	-3.77384	0	0.29777	0.447363	-1.12374
0000010_24.tif	predator	RB1254	dop4	17.252	12.214	5.27621	1.66892	-3.60729	0	0.29777	0.496956	-1.07414
0000010_24.tif	predator	RB1254	dop4	18.946	12.936	5.27621	3.47976	-1.79646	0	0.29777	1.03617	-0.534931
0000010_24.tif	predator	RB1254	dop4	19.064	12.686	5.27621	3.5354	-1.74082	0	0.29777	1.05274	-0.518363
0000010_24.tif	predator	RB1254	dop4	18.655	11.856	5.27621	3.05868	-2.21753	0	0.29777	0.910783	-0.660315
0000010_24.tif	predator	RB1254	dop4	17.752	11.446	5.27621	2.2192	-3.05701	0	0.29777	0.660811	-0.910287
0000010_24.tif	predator	RB1254	dop4	18.432	10.717	5.27621	3.10341	-2.1728	0	0.29777	0.924104	-0.646994
0000010_24.tif	predator	RB1254	dop4	16.342	7.616	5.27621	4.43074	-0.845472	0	0.29777	1.31934	-0.251756
0000010_24.tif	predator	RB1254	dop4	16.543	7.359	5.27621	4.72036	-0.555857	0	0.29777	1.40558	-0.165518
0000010_24.tif	predator	RB1254	dop4	16.884	6.356	5.27621	5.77283	0.49662	1	0.29777	1.71898	0.147879
0000010_24.tif	predator	RB1254	dop4	17.946	5.144	5.27621	7.23146	1.95525	1	0.29777	2.15331	0.582214
0000010_24.tif	predator	RB1254	dop4	17.995	5.276	5.27621	7.12307	1.84685	1	0.29777	2.12104	0.549938
0000010_24.tif	predator	RB1254	dop4	18.189	5.255	5.27621	7.21024	1.93403	1	0.29777	2.14699	0.575895
0000010_24.tif	predator	RB1254	dop4	18.3	5.2	5.27621	7.30192	2.02571	1	0.29777	2.17429	0.603195
0000010_24.tif	predator	RB1254	dop4	18.328	5.672	5.27621	6.87668	1.60047	1	0.29777	2.04767	0.476572
0000010_24.tif	predator	RB1254	dop4	19.599	5.304	5.27621	7.78604	2.50983	1	0.29777	2.31845	0.747351
0000010_24.tif	predator	RB1254	dop4	19.682	4.644	5.27621	8.3992	3.12298	1	0.29777	2.50103	0.92993
0000010_24.tif	predator	RB1254	dop4	19.689	4.422	5.27621	8.59721	3.32099	1	0.29777	2.55999	0.988892
0000010_24.tif	predator	RB1254	dop4	16.606	2.009	5.27621	10.0257	4.74949	1	0.29777	2.98535	1.41425
0000010_24.tif	predator	RB1254	dop4	15.155	2.613	5.27621	9.38151	4.1053	1	0.29777	2.79353	1.22243
0000010_24.tif	predator	RB1254	dop4	20.248	4.005	5.27621	9.23459	3.95838	1	0.29777	2.74978	1.17869
0000010_24.tif	predator	RB1254	dop4	20.033	4.936	5.27621	8.32674	3.05053	1	0.29777	2.47945	0.908356
0000010_24.tif	predator	RB1254	dop4	20.47	4.887	5.27621	8.60779	3.33158	1	0.29777	2.56314	0.992044
0000010_24.tif	predator	RB1254	dop4	19.936	6.075	5.27621	7.32979	2.05358	1	0.29777	2.18259	0.611494
0000010_24.tif	predator	RB1254	dop4	20.012	6.283	5.27621	7.20944	1.93322	1	0.29777	2.14675	0.575656
0000010_24.tif	predator	RB1254	dop4	21.158	5.693	5.27621	8.39519	3.11897	1	0.29777	2.49983	0.928737
0000010_24.tif	predator	RB1254	dop4	21.026	5.47	5.27621	8.47847	3.20226	1	0.29777	2.52464	0.953537
0000010_24.tif	predator	RB1254	dop4	21.415	4.672	5.27621	9.34298	4.06676	1	0.29777	2.78206	1.21096
0000010_24.tif	predator	RB1254	dop4	22.533	5.714	5.27621	9.34844	4.07222	1	0.29777	2.78368	1.21259
0000010_24.tif	predator	RB1254	dop4	24.234	6.811	5.27621	10.0659	4.78973	1	0.29777	2.99734	1.42624
0000010_24.tif	predator	RB1254	dop4	21.13	7.401	5.27621	7.18303	1.90681	1	0.29777	2.13889	0.567791
0000010_24.tif	predator	RB1254	dop4	21.387	7.345	5.27621	7.41763	2.14142	1	0.29777	2.20875	0.63765
0000010_24.tif	predator	RB1254	dop4	24.29	8.325	5.27621	9.42983	4.15362	1	0.29777	2.80792	1.23682
0000010_24.tif	predator	RB1254	dop4	24.38	8.394	5.27621	9.48652	4.21031	1	0.29777	2.8248	1.2537
0000010_24.tif	predator	RB1254	dop4	21.415	9.262	5.27621	6.42146	1.14525	1	0.29777	1.91212	0.34102
0000010_24.tif	predator	RB1254	dop4	19.929	10.443	5.27621	4.59604	-0.680174	0	0.29777	1.36856	-0.202535
0000010_24.tif	predator	RB1254	dop4	20.408	10.582	5.27621	5.0092	-0.267013	0	0.29777	1.49159	-0.0795086
0000010_24.tif	predator	RB1254	dop4	21.609	10.908	5.27621	6.10556	0.829348	1	0.29777	1.81805	0.246955
0000010_24.tif	predator	RB1254	dop4	22.991	10.415	5.27621	7.55668	2.28047	1	0.29777	2.25015	0.679055
0000010_24.tif	predator	RB1254	dop4	20.616	13.109	5.27621	5.14159	-0.134627	0	0.29777	1.53101	-0.0400878
0000010_24.tif	predator	RB1254	dop4	22.359	13.262	5.27621	6.87974	1.60353	1	0.29777	2.04858	0.477483
0000010_24.tif	predator	RB1254	dop4	22.47	13.401	5.27621	7.01559	1.73938	1	0.29777	2.08903	0.517935
0000010_24.tif	predator	RB1254	dop4	20.665	17.224	5.27621	7.28848	2.01227	1	0.29777	2.17029	0.599193
0000011_10.tif	control	LX702	dop2	9.911	10.557	5.28128	4.8517	-0.429582	0	0.29777	1.44469	-0.127917
0000011_10.tif	control	LX702	dop2	7.411	7.156	5.28128	8.60258	3.3213	1	0.29777	2.56159	0.988983
0000011_10.tif	control	LX702	dop2	7.62	7.141	5.28128	8.43816	3.15688	1	0.29777	2.51263	0.940025
0000011_10.tif	control	LX702	dop2	6.068	11.771	5.28128	8.49564	3.21436	1	0.29777	2.52975	0.957141
0000011_10.tif	control	LX702	dop2	6.885	12.625	5.28128	7.70768	2.4264	1	0.29777	2.29512	0.722509
0000011_10.tif	control	LX702	dop2	7.208	12.401	5.28128	7.36856	2.08728	1	0.29777	2.19414	0.62153
0000011_10.tif	control	LX702	dop2	9.99	10.823	5.28128	4.706	-0.575281	0	0.29777	1.4013	-0.171302
0000011_10.tif	control	LX702	dop2	10.849	17.083	5.28128	6.34487	1.06359	1	0.29777	1.88931	0.316706
0000011_10.tif	control	LX702	dop2	10.979	17.089	5.28128	6.27461	0.993328	1	0.29777	1.86839	0.295783
0000011_10.tif	control	LX702	dop2	10.573	15.854	5.28128	5.58992	0.308639	1	0.29777	1.66451	0.0919034
0000011_10.tif	control	LX702	dop2	11.552	15.776	5.28128	4.87753	-0.403744	0	0.29777	1.45238	-0.120223
0000011_10.tif	control	LX702	dop2	11.823	16.156	5.28128	5.02928	-0.252	0	0.29777	1.49757	-0.075038
0000011_10.tif	control	LX702	dop2	12.073	16.323	5.28128	5.04216	-0.239122	0	0.29777	1.5014	-0.0712033
0000011_10.tif	control	LX702	dop2	12.292	16.13	5.28128	4.76715	-0.514124	0	0.29777	1.41952	-0.153091
0000011_10.tif	control	LX702	dop2	12.719	15.297	5.28128	3.83139	-1.44989	0	0.29777	1.14087	-0.431734
0000011_10.tif	control	LX702	dop2	10.75	14.552	5.28128	4.62216	-0.659121	0	0.29777	1.37634	-0.196266
0000011_10.tif	control	LX702	dop2	10.677	14.49	5.28128	4.64822	-0.633061	0	0.29777	1.3841	-0.188507
0000011_10.tif	control	LX702	dop2	10.344	14.24	5.28128	4.80528	-0.475997	0	0.29777	1.43087	-0.141738
0000011_10.tif	control	LX702	dop2	10.375	13.474	5.28128	4.45985	-0.821428	0	0.29777	1.32801	-0.244597
0000011_10.tif	control	LX702	dop2	10.219	13.365	5.28128	4.57143	-0.709848	0	0.29777	1.36123	-0.211371
0000011_10.tif	control	LX702	dop2	10.115	13.323	5.28128	4.65769	-0.623593	0	0.29777	1.38692	-0.185687
0000011_10.tif	control	LX702	dop2	10.38	13.25	5.28128	4.38297	-0.898304	0	0.29777	1.30512	-0.267488
0000011_10.tif	control	LX702	dop2	10.891	12.474	5.28128	3.70992	-1.57135	0	0.29777	1.1047	-0.467902
0000011_10.tif	control	LX702	dop2	11.578	12.208	5.28128	2.99619	-2.28509	0	0.29777	0.892176	-0.680431
0000011_10.tif	control	LX702	dop2	11.484	11.911	5.28128	3.07812	-2.20316	0	0.29777	0.916571	-0.656035
0000011_10.tif	control	LX702	dop2	11.552	11.823	5.28128	3.0122	-2.26908	0	0.29777	0.896942	-0.675665
0000011_10.tif	control	LX702	dop2	12.391	11.828	5.28128	2.17378	-3.10749	0	0.29777	0.647288	-0.925318
0000011_10.tif	control	LX702	dop2	11.958	10.844	5.28128	2.82447	-2.4568	0	0.29777	0.841044	-0.731563
0000011_10.tif	control	LX702	dop2	11.969	10.615	5.28128	2.91101	-2.37027	0	0.29777	0.866811	-0.705795
0000011_10.tif	control	LX702	dop2	12.031	10.724	5.28128	2.80709	-2.47419	0	0.29777	0.835867	-0.736739
0000011_10.tif	control	LX702	dop2	12.49	10.495	5.28128	2.52496	-2.75632	0	0.29777	0.751858	-0.820748
0000011_10.tif	control	LX702	dop2	12.859	9.833	5.28128	2.70763	-2.57365	0	0.29777	0.80625	-0.766357
0000011_10.tif	control	LX702	dop2	10.526	9.969	5.28128	4.49069	-0.790593	0	0.29777	1.33719	-0.235415
0000011_10.tif	control	LX702	dop2	10.714	9.505	5.28128	4.55265	-0.728632	0	0.29777	1.35564	-0.216965
0000011_10.tif	control	LX702	dop2	13.589	8.214	5.28128	3.84901	-1.43227	0	0.29777	1.14612	-0.426486
0000011_10.tif	control	LX702	dop2	13.688	8.318	5.28128	3.72401	-1.55727	0	0.29777	1.1089	-0.463707
0000011_10.tif	control	LX702	dop2	13.88	8.328	5.28128	3.67386	-1.60742	0	0.29777	1.09396	-0.478642
0000011_10.tif	control	LX702	dop2	14.167	8.682	5.28128	3.27987	-2.00141	0	0.29777	0.976648	-0.595959
0000011_10.tif	control	LX702	dop2	14.74	8.615	5.28128	3.32776	-1.95351	0	0.29777	0.990908	-0.581698
0000011_10.tif	control	LX702	dop2	14.729	8.182	5.28128	3.75971	-1.52157	0	0.29777	1.11953	-0.453077
0000011_10.tif	control	LX702	dop2	14.547	7.865	5.28128	4.07303	-1.20825	0	0.29777	1.21283	-0.359781
0000011_10.tif	control	LX702	dop2	13	9.245	5.28128	3.11321	-2.16807	0	0.29777	0.927021	-0.645585
0000011_10.tif	control	LX702	dop2	13.557	9.542	5.28128	2.59824	-2.68304	0	0.29777	0.773677	-0.798929
0000011_10.tif	control	LX702	dop2	13.562	9.438	5.28128	2.69258	-2.5887	0	0.29777	0.80177	-0.770836
0000011_10.tif	control	LX702	dop2	13.646	9.422	5.28128	2.67756	-2.60372	0	0.29777	0.797296	-0.77531
0000011_10.tif	control	LX702	dop2	13.635	10.042	5.28128	2.11048	-3.17079	0	0.29777	0.628439	-0.944167
0000011_10.tif	control	LX702	dop2	14.37	9.432	5.28128	2.51334	-2.76793	0	0.29777	0.748399	-0.824208
0000011_10.tif	control	LX702	dop2	14.443	9.708	5.28128	2.23317	-3.04811	0	0.29777	0.664972	-0.907634
0000011_10.tif	control	LX702	dop2	14.568	9.682	5.28128	2.25601	-3.02527	0	0.29777	0.671771	-0.900835
0000011_10.tif	control	LX702	dop2	14.609	9.917	5.28128	2.02155	-3.25973	0	0.29777	0.601956	-0.97065
0000011_10.tif	control	LX702	dop2	14.141	10.276	5.28128	1.71449	-3.56679	0	0.29777	0.510524	-1.06208
0000011_10.tif	control	LX702	dop2	14.214	10.344	5.28128	1.63155	-3.64973	0	0.29777	0.485825	-1.08678
0000011_10.tif	control	LX702	dop2	13.844	10.771	5.28128	1.37019	-3.91109	0	0.29777	0.408001	-1.16461
0000011_10.tif	control	LX702	dop2	13.729	11.073	5.28128	1.20088	-4.0804	0	0.29777	0.357586	-1.21502
0000011_10.tif	control	LX702	dop2	13.599	11.234	5.28128	1.19289	-4.08839	0	0.29777	0.355207	-1.2174
0000011_10.tif	control	LX702	dop2	13.818	12.198	5.28128	0.788122	-4.49316	0	0.29777	0.234679	-1.33793
0000011_10.tif	control	LX702	dop2	13.88	12.099	5.28128	0.700746	-4.58053	0	0.29777	0.208661	-1.36395
0000011_10.tif	control	LX702	dop2	14.01	12.104	5.28128	0.57642	-4.70486	0	0.29777	0.171641	-1.40097
0000011_10.tif	control	LX702	dop2	14.51	13.135	5.28128	1.19813	-4.08315	0	0.29777	0.356767	-1.21584
0000011_10.tif	control	LX702	dop2	13.188	13.557	5.28128	2.12345	-3.15783	0	0.29777	0.6323	-0.940307
0000011_10.tif	control	LX702	dop2	13.344	14.271	5.28128	2.63181	-2.64947	0	0.29777	0.783673	-0.788933
0000011_10.tif	control	LX702	dop2	13.609	14.042	5.28128	2.30977	-2.97151	0	0.29777	0.687779	-0.884827
0000011_10.tif	control	LX702	dop2	13.182	14.953	5.28128	3.31581	-1.96546	0	0.29777	0.98735	-0.585256
0000011_10.tif	control	LX702	dop2	12.979	14.99	5.28128	3.43811	-1.84317	0	0.29777	1.02377	-0.548841
0000011_10.tif	control	LX702	dop2	13.661	15.375	5.28128	3.55314	-1.72814	0	0.29777	1.05802	-0.514589
0000011_10.tif	control	LX702	dop2	13.443	16.167	5.28128	4.37454	-0.906738	0	0.29777	1.30261	-0.269999
0000011_10.tif	control	LX702	dop2	13.974	16.656	5.28128	4.7545	-0.526779	0	0.29777	1.41575	-0.156859
0000011_10.tif	control	LX702	dop2	14.724	16.714	5.28128	4.77875	-0.502532	0	0.29777	1.42297	-0.149639
0000011_10.tif	control	LX702	dop2	15.604	20.922	5.28128	9.04423	3.76295	1	0.29777	2.6931	1.12049
0000011_10.tif	control	LX702	dop2	15.526	20.766	5.28128	8.88048	3.5992	1	0.29777	2.64434	1.07173
0000011_10.tif	control	LX702	dop2	15.646	20.406	5.28128	8.5371	3.25582	1	0.29777	2.54209	0.969486
0000011_10.tif	control	LX702	dop2	15.984	20.172	5.28128	8.35589	3.07461	1	0.29777	2.48813	0.915526
0000011_10.tif	control	LX702	dop2	15.88	19.88	5.28128	8.05062	2.76934	1	0.29777	2.39723	0.824627
0000011_10.tif	control	LX702	dop2	15.109	18.427	5.28128	6.51201	1.23074	1	0.29777	1.93908	0.366476
0000011_10.tif	control	LX702	dop2	15.24	18.344	5.28128	6.44178	1.1605	1	0.29777	1.91817	0.345562
0000011_10.tif	control	LX702	dop2	15.333	15.953	5.28128	4.08836	-1.19292	0	0.29777	1.21739	-0.355216
0000011_10.tif	control	LX702	dop2	15.271	15.594	5.28128	3.72411	-1.55717	0	0.29777	1.10893	-0.463677
0000011_10.tif	control	LX702	dop2	15.281	15.49	5.28128	3.62404	-1.65724	0	0.29777	1.07913	-0.493476
0000011_10.tif	control	LX702	dop2	15.859	13.818	5.28128	2.28399	-2.99729	0	0.29777	0.680104	-0.892503
0000011_10.tif	control	LX702	dop2	15.953	13.818	5.28128	2.33865	-2.94263	0	0.29777	0.69638	-0.876227
0000011_10.tif	control	LX702	dop2	14.964	13.849	5.28128	1.95282	-3.32845	0	0.29777	0.581493	-0.991114
0000011_10.tif	control	LX702	dop2	15.12	13.656	5.28128	1.80635	-3.47493	0	0.29777	0.537876	-1.03473
0000011_10.tif	control	LX702	dop2	14.87	13.495	5.28128	1.58717	-3.69411	0	0.29777	0.472612	-1.09999
0000011_10.tif	control	LX702	dop2	15.047	12.818	5.28128	1.0048	-4.27648	0	0.29777	0.2992	-1.27341
0000011_10.tif	control	LX702	dop2	15.135	12.802	5.28128	1.03674	-4.24454	0	0.29777	0.308709	-1.2639
0000011_10.tif	control	LX702	dop2	15.479	12.599	5.28128	1.1304	-4.15088	0	0.29777	0.3366	-1.23601
0000011_10.tif	control	LX702	dop2	15.88	12.271	5.28128	1.35942	-3.92186	0	0.29777	0.404793	-1.16781
0000011_10.tif	control	LX702	dop2	15	10.177	5.28128	1.81465	-3.46663	0	0.29777	0.540349	-1.03226
0000011_10.tif	control	LX702	dop2	15.786	10.833	5.28128	1.649	-3.63228	0	0.29777	0.491023	-1.08158
0000011_10.tif	control	LX702	dop2	15.062	9.021	5.28128	2.95954	-2.32174	0	0.29777	0.881263	-0.691344
0000011_10.tif	control	LX702	dop2	15.328	9.182	5.28128	2.86047	-2.42081	0	0.29777	0.851762	-0.720844
0000011_10.tif	control	LX702	dop2	15.589	8.771	5.28128	3.32936	-1.95192	0	0.29777	0.991383	-0.581224
0000011_10.tif	control	LX702	dop2	15.896	8.891	5.28128	3.32622	-1.95505	0	0.29777	0.99045	-0.582157
0000011_10.tif	control	LX702	dop2	15.984	8.068	5.28128	4.12298	-1.1583	0	0.29777	1.2277	-0.344906
0000011_10.tif	control	LX702	dop2	15.396	8.193	5.28128	3.83674	-1.44454	0	0.29777	1.14247	-0.43014
0000011_10.tif	control	LX702	dop2	16.146	7.76	5.28128	4.46819	-0.813087	0	0.29777	1.33049	-0.242113
0000011_10.tif	control	LX702	dop2	16.427	7.391	5.28128	4.91461	-0.366664	0	0.29777	1.46342	-0.109182
0000011_10.tif	control	LX702	dop2	16.448	7.922	5.28128	4.43681	-0.844472	0	0.29777	1.32115	-0.251458
0000011_10.tif	control	LX702	dop2	16.823	8.49	5.28128	4.12321	-1.15807	0	0.29777	1.22777	-0.344839
0000011_10.tif	control	LX702	dop2	16.99	8.318	5.28128	4.35885	-0.922427	0	0.29777	1.29794	-0.274671
0000011_10.tif	control	LX702	dop2	17.307	8.203	5.28128	4.63522	-0.64606	0	0.29777	1.38023	-0.192377
0000011_10.tif	control	LX702	dop2	17.557	8.297	5.28128	4.71454	-0.566737	0	0.29777	1.40385	-0.168757
0000011_10.tif	control	LX702	dop2	17.734	7	5.28128	5.86902	0.587744	1	0.29777	1.74762	0.175013
0000011_10.tif	control	LX702	dop2	17.771	6.901	5.28128	5.97236	0.691079	1	0.29777	1.77839	0.205782
0000011_10.tif	control	LX702	dop2	18.943	7.26	5.28128	6.40912	1.12784	1	0.29777	1.90844	0.335838
0000011_10.tif	control	LX702	dop2	19.068	7.156	5.28128	6.57051	1.28923	1	0.29777	1.9565	0.383893
0000011_10.tif	control	LX702	dop2	17.182	8.745	5.28128	4.13033	-1.15095	0	0.29777	1.22989	-0.342717
0000011_10.tif	control	LX702	dop2	17.062	8.938	5.28128	3.90512	-1.37615	0	0.29777	1.16283	-0.409777
0000011_10.tif	control	LX702	dop2	16.422	8.708	5.28128	3.72726	-1.55401	0	0.29777	1.10987	-0.462739
0000011_10.tif	control	LX702	dop2	17.615	8.875	5.28128	4.32467	-0.956608	0	0.29777	1.28776	-0.284849
0000011_10.tif	control	LX702	dop2	17.677	8.995	5.28128	4.28538	-0.9959	0	0.29777	1.27606	-0.296549
0000011_10.tif	control	LX702	dop2	17.849	9.938	5.28128	3.84764	-1.43363	0	0.29777	1.14571	-0.426893
0000011_10.tif	control	LX702	dop2	18.01	9.823	5.28128	4.04499	-1.23629	0	0.29777	1.20448	-0.36813
0000011_10.tif	control	LX702	dop2	18.234	10.417	5.28128	3.97455	-1.30673	0	0.29777	1.1835	-0.389105
0000011_10.tif	control	LX702	dop2	17.906	10.531	5.28128	3.62795	-1.65333	0	0.29777	1.08029	-0.492313
0000011_10.tif	control	LX702	dop2	18.818	10.349	5.28128	4.54296	-0.738322	0	0.29777	1.35276	-0.21985
0000011_10.tif	control	LX702	dop2	17.323	10.635	5.28128	3.05302	-2.22826	0	0.29777	0.909098	-0.663509
0000011_10.tif	control	LX702	dop2	16.484	11.297	5.28128	2.02607	-3.25521	0	0.29777	0.603303	-0.969303
0000011_10.tif	control	LX702	dop2	16.703	11.589	5.28128	2.16926	-3.11202	0	0.29777	0.64594	-0.926666
0000011_10.tif	control	LX702	dop2	16.583	11.766	5.28128	2.02831	-3.25297	0	0.29777	0.603969	-0.968638
0000011_10.tif	control	LX702	dop2	16.37	11.703	5.28128	1.82321	-3.45807	0	0.29777	0.542897	-1.02971
0000011_10.tif	control	LX702	dop2	18.568	12.172	5.28128	4.01283	-1.26845	0	0.29777	1.1949	-0.377706
0000011_10.tif	control	LX702	dop2	18.51	12.266	5.28128	3.9616	-1.31968	0	0.29777	1.17965	-0.39296
0000011_10.tif	control	LX702	dop2	16.703	16.729	5.28128	5.24762	-0.0336542	0	0.29777	1.56259	-0.0100212
0000011_10.tif	control	LX702	dop2	17.604	20.589	5.28128	9.17025	3.88898	1	0.29777	2.73063	1.15802
0000011_10.tif	control	LX702	dop2	20.79	5.498	5.28128	8.95888	3.6776	1	0.29777	2.66769	1.09508
0000011_10.tif	control	LX702	dop2	22.061	6.054	5.28128	9.53187	4.25059	1	0.29777	2.8383	1.2657
0000011_10.tif	control	LX702	dop2	22.304	5.95	5.28128	9.78748	4.5062	1	0.29777	2.91442	1.34181
0000012_20.tif	predator	N2	wt	5.708	6.349	5.28128	8.63516	3.35388	1	0.29777	2.57129	0.998685
0000012_20.tif	predator	N2	wt	5.151	7.318	5.28128	8.67388	3.3926	1	0.29777	2.58282	1.01021
0000012_20.tif	predator	N2	wt	5.01	13.349	5.28128	8.4235	3.14222	1	0.29777	2.50827	0.93566
0000012_20.tif	predator	N2	wt	4.693	13.458	5.28128	8.75854	3.47726	1	0.29777	2.60803	1.03542
0000012_20.tif	predator	N2	wt	6.708	18.042	5.28128	9.57806	4.29678	1	0.29777	2.85206	1.27945
0000012_20.tif	predator	N2	wt	6.682	17.896	5.28128	9.48677	4.20549	1	0.29777	2.82488	1.25227
0000012_20.tif	predator	N2	wt	7.724	17.677	5.28128	8.64647	3.36519	1	0.29777	2.57466	1.00205
0000012_20.tif	predator	N2	wt	9.094	18.083	5.28128	8.22802	2.94674	1	0.29777	2.45006	0.877451
0000012_20.tif	predator	N2	wt	9.161	18.026	5.28128	8.14583	2.86455	1	0.29777	2.42558	0.852978
0000012_20.tif	predator	N2	wt	9.297	18.615	5.28128	8.60714	3.32586	1	0.29777	2.56295	0.990341
0000012_20.tif	predator	N2	wt	9.312	18.74	5.28128	8.71325	3.43197	1	0.29777	2.59454	1.02194
0000012_20.tif	predator	N2	wt	9.276	18.833	5.28128	8.81269	3.53141	1	0.29777	2.62416	1.05155
0000012_20.tif	predator	N2	wt	9.49	19.047	5.28128	8.91856	3.63728	1	0.29777	2.65568	1.08307
0000012_20.tif	predator	N2	wt	10.078	19.542	5.28128	9.1663	3.88503	1	0.29777	2.72945	1.15684
0000012_20.tif	predator	N2	wt	10.375	19.37	5.28128	8.90983	3.62855	1	0.29777	2.65308	1.08047
0000012_20.tif	predator	N2	wt	10.328	19.26	5.28128	8.81947	3.53819	1	0.29777	2.62617	1.05357
0000012_20.tif	predator	N2	wt	10.427	19.245	5.28128	8.77497	3.49369	1	0.29777	2.61292	1.04032
0000012_20.tif	predator	N2	wt	10.349	19.073	5.28128	8.63525	3.35397	1	0.29777	2.57132	0.998713
0000012_20.tif	predator	N2	wt	10.526	17.995	5.28128	7.55815	2.27688	1	0.29777	2.25059	0.677985
0000012_20.tif	predator	N2	wt	9.797	18.13	5.28128	7.95583	2.67455	1	0.29777	2.36901	0.796402
0000012_20.tif	predator	N2	wt	8.448	14.094	5.28128	5.62592	0.34464	1	0.29777	1.67523	0.102623
0000012_20.tif	predator	N2	wt	8.281	13.911	5.28128	5.6635	0.382224	1	0.29777	1.68642	0.113815
0000012_20.tif	predator	N2	wt	6.906	13.464	5.28128	6.67827	1.39699	1	0.29777	1.98859	0.415981
0000012_20.tif	predator	N2	wt	7.479	10.505	5.28128	5.59525	0.313968	1	0.29777	1.6661	0.0934904
0000012_20.tif	predator	N2	wt	7.833	10.458	5.28128	5.2456	-0.0356776	0	0.29777	1.56198	-0.0106237
0000012_20.tif	predator	N2	wt	8.583	11.958	5.28128	4.60807	-0.673206	0	0.29777	1.37215	-0.200461
0000012_20.tif	predator	N2	wt	8.771	11.88	5.28128	4.40712	-0.874159	0	0.29777	1.31231	-0.260298
0000012_20.tif	predator	N2	wt	8.885	11.771	5.28128	4.27202	-1.00926	0	0.29777	1.27208	-0.300527
0000012_20.tif	predator	N2	wt	8.901	12.089	5.28128	4.33448	-0.946799	0	0.29777	1.29068	-0.281928
0000012_20.tif	predator	N2	wt	9.812	6.974	5.28128	5.07743	-0.203848	0	0.29777	1.51191	-0.0606998
0000012_20.tif	predator	N2	wt	7.521	5.667	5.28128	7.60434	2.32306	1	0.29777	2.26434	0.691737
0000012_20.tif	predator	N2	wt	7.698	5.219	5.28128	7.79505	2.51377	1	0.29777	2.32113	0.748526
0000012_20.tif	predator	N2	wt	8.734	5.745	5.28128	6.71182	1.43054	1	0.29777	1.99858	0.425971
0000012_20.tif	predator	N2	wt	8.917	5.698	5.28128	6.63192	1.35064	1	0.29777	1.97479	0.40218
0000012_20.tif	predator	N2	wt	9.234	6.005	5.28128	6.19439	0.913113	1	0.29777	1.8445	0.271898
0000012_20.tif	predator	N2	wt	10.203	5.594	5.28128	6.00523	0.723956	1	0.29777	1.78818	0.215572
0000012_20.tif	predator	N2	wt	9.849	5.432	5.28128	6.32057	1.03929	1	0.29777	1.88208	0.30947
0000012_20.tif	predator	N2	wt	8.969	4.833	5.28128	7.29784	2.01656	1	0.29777	2.17308	0.60047
0000012_20.tif	predator	N2	wt	8.693	4.589	5.28128	7.65519	2.37391	1	0.29777	2.27949	0.70688
0000012_20.tif	predator	N2	wt	9.203	4.62	5.28128	7.34962	2.06834	1	0.29777	2.1885	0.61589
0000012_20.tif	predator	N2	wt	9.219	4.458	5.28128	7.47974	2.19846	1	0.29777	2.22724	0.654636
0000012_20.tif	predator	N2	wt	9.266	4.5	5.28128	7.41958	2.13831	1	0.29777	2.20933	0.636723
0000012_20.tif	predator	N2	wt	12.036	2.172	5.28128	8.76327	3.48199	1	0.29777	2.60944	1.03683
0000012_20.tif	predator	N2	wt	12.161	2.734	5.28128	8.19071	2.90943	1	0.29777	2.43895	0.866341
0000012_20.tif	predator	N2	wt	12.49	4.453	5.28128	6.44742	1.16614	1	0.29777	1.91985	0.347243
0000012_20.tif	predator	N2	wt	12.995	4.464	5.28128	6.41135	1.13007	1	0.29777	1.90911	0.336501
0000012_20.tif	predator	N2	wt	11.484	6.474	5.28128	4.67535	-0.60593	0	0.29777	1.39218	-0.180428
0000012_20.tif	predator	N2	wt	12.359	15.365	5.28128	4.5447	-0.736577	0	0.29777	1.35328	-0.219331
0000012_20.tif	predator	N2	wt	12.589	16.964	5.28128	6.10734	0.826065	1	0.29777	1.81858	0.245977
0000012_20.tif	predator	N2	wt	12.698	16.823	5.28128	5.95913	0.677849	1	0.29777	1.77445	0.201843
0000012_20.tif	predator	N2	wt	12.781	16.922	5.28128	6.05353	0.772247	1	0.29777	1.80256	0.229952
0000012_20.tif	predator	N2	wt	13.901	16.833	5.28128	6.01678	0.735505	1	0.29777	1.79162	0.219011
0000012_20.tif	predator	N2	wt	11.167	16.812	5.28128	6.23209	0.950815	1	0.29777	1.85573	0.283124
0000012_20.tif	predator	N2	wt	12.802	18.161	5.28128	7.29064	2.00936	1	0.29777	2.17093	0.598327
0000012_20.tif	predator	N2	wt	12.708	18.276	5.28128	7.40946	2.12818	1	0.29777	2.20632	0.633709
0000012_20.tif	predator	N2	wt	12.865	18.312	5.28128	7.43961	2.15833	1	0.29777	2.21529	0.642686
0000012_20.tif	predator	N2	wt	11.755	19.531	5.28128	8.75412	3.47284	1	0.29777	2.60671	1.03411
0000012_20.tif	predator	N2	wt	11.99	19.479	5.28128	8.67052	3.38925	1	0.29777	2.58182	1.00922
0000012_20.tif	predator	N2	wt	13.203	20.042	5.28128	9.16808	3.88681	1	0.29777	2.72998	1.15737
0000012_20.tif	predator	N2	wt	13.719	20.698	5.28128	9.84495	4.56367	1	0.29777	2.93153	1.35892
0000012_20.tif	predator	N2	wt	16.073	20.255	5.28128	9.85142	4.57014	1	0.29777	2.93346	1.36085
0000012_20.tif	predator	N2	wt	16.198	20.104	5.28128	9.74725	4.46597	1	0.29777	2.90244	1.32983
0000012_20.tif	predator	N2	wt	16.479	18.526	5.28128	8.37936	3.09808	1	0.29777	2.49512	0.922516
0000012_20.tif	predator	N2	wt	16.292	18.391	5.28128	8.18066	2.89938	1	0.29777	2.43595	0.863348
0000012_20.tif	predator	N2	wt	15.25	16.906	5.28128	6.41563	1.13435	1	0.29777	1.91038	0.337776
0000012_20.tif	predator	N2	wt	15.25	16.797	5.28128	6.31327	1.032	1	0.29777	1.8799	0.307297
0000012_20.tif	predator	N2	wt	18.354	15.661	5.28128	7.1352	1.85392	1	0.29777	2.12465	0.552042
0000012_20.tif	predator	N2	wt	16.604	14.849	5.28128	5.32339	0.0421075	1	0.29777	1.58514	0.0125384
0000012_20.tif	predator	N2	wt	15.062	15.37	5.28128	4.91986	-0.361418	0	0.29777	1.46499	-0.10762
0000012_20.tif	predator	N2	wt	16.87	14.094	5.28128	4.98626	-0.295015	0	0.29777	1.48476	-0.0878466
0000012_20.tif	predator	N2	wt	17.936	12.936	5.28128	5.29184	0.0105639	1	0.29777	1.57575	0.00314561
0000012_20.tif	predator	N2	wt	18.408	12.832	5.28128	5.69294	0.411661	1	0.29777	1.69519	0.12258
0000012_20.tif	predator	N2	wt	18.651	12.651	5.28128	5.86439	0.583114	1	0.29777	1.74624	0.173634
0000012_20.tif	predator	N2	wt	18.693	13.408	5.28128	6.17448	0.893205	1	0.29777	1.83858	0.26597
0000012_20.tif	predator	N2	wt	18.165	11.196	5.28128	5.11309	-0.168192	0	0.29777	1.52252	-0.0500827
0000012_20.tif	predator	N2	wt	18.345	10.905	5.28128	5.28309	0.00180657	1	0.29777	1.57314	0.000537941
0000012_20.tif	predator	N2	wt	18.964	10.332	5.28128	5.92693	0.645647	1	0.29777	1.76486	0.192254
0000012_20.tif	predator	N2	wt	18.991	9.984	5.28128	5.99558	0.714297	1	0.29777	1.7853	0.212696
0000012_20.tif	predator	N2	wt	18.984	9.665	5.28128	6.04435	0.763073	1	0.29777	1.79983	0.22722
0000012_20.tif	predator	N2	wt	17.908	9.061	5.28128	5.17439	-0.106889	0	0.29777	1.54078	-0.0318282
0000012_20.tif	predator	N2	wt	17.443	8.727	5.28128	4.87925	-0.40203	0	0.29777	1.45289	-0.119713
0000012_20.tif	predator	N2	wt	19.005	9.241	5.28128	6.16354	0.88226	1	0.29777	1.83532	0.26271
0000012_20.tif	predator	N2	wt	19.359	9.227	5.28128	6.50908	1.2278	1	0.29777	1.93821	0.365602
0000012_20.tif	predator	N2	wt	19.227	9.464	5.28128	6.32441	1.04313	1	0.29777	1.88322	0.310613
0000012_20.tif	predator	N2	wt	19.429	9.464	5.28128	6.52147	1.24019	1	0.29777	1.9419	0.369293
0000012_20.tif	predator	N2	wt	19.984	9.401	5.28128	7.0772	1.79592	1	0.29777	2.10738	0.534772
0000012_20.tif	predator	N2	wt	19.283	8.637	5.28128	6.61131	1.33004	1	0.29777	1.96865	0.396045
0000012_20.tif	predator	N2	wt	17.672	7.22	5.28128	5.88312	0.601843	1	0.29777	1.75182	0.179211
0000012_20.tif	predator	N2	wt	14.852	5.457	5.28128	5.70603	0.424755	1	0.29777	1.69909	0.126479
0000012_20.tif	predator	N2	wt	20.62	4.432	5.28128	9.93155	4.65027	1	0.29777	2.95732	1.38471
0000012_20.tif	predator	N2	wt	21.036	5.568	5.28128	9.57857	4.29729	1	0.29777	2.85221	1.2796
0000012_20.tif	predator	N2	wt	21.13	5.703	5.28128	9.58343	4.30216	1	0.29777	2.85366	1.28105
0000012_20.tif	predator	N2	wt	21.078	6.161	5.28128	9.29936	4.01808	1	0.29777	2.76907	1.19646
0000012_20.tif	predator	N2	wt	21.047	6.37	5.28128	9.16817	3.88689	1	0.29777	2.73	1.1574
0000012_20.tif	predator	N2	wt	20.401	8.276	5.28128	7.78561	2.50433	1	0.29777	2.31832	0.745715
0000012_20.tif	predator	N2	wt	20.484	8.37	5.28128	7.83333	2.55205	1	0.29777	2.33253	0.759925
0000012_20.tif	predator	N2	wt	20.443	8.651	5.28128	7.70878	2.4275	1	0.29777	2.29544	0.722838
0000012_20.tif	predator	N2	wt	20.703	9.391	5.28128	7.78377	2.5025	1	0.29777	2.31777	0.745168
0000012_20.tif	predator	N2	wt	22.339	9.141	5.28128	9.43766	4.15638	1	0.29777	2.81025	1.23765
0000012_20.tif	predator	N2	wt	22.464	9.224	5.28128	9.54586	4.26458	1	0.29777	2.84247	1.26986
0000012_20.tif	predator	N2	wt	21.672	16.526	5.28128	10.2988	5.01755	1	0.29777	3.06668	1.49408
0000012_20.tif	predator	N2	wt	21.516	16.661	5.28128	10.2444	4.96313	1	0.29777	3.05048	1.47787
00000014_3.tif	predator	CF2805	dop1234	7.312	17.448	5.48971	10.2224	4.73265	1	0.29777	3.04391	1.40924
00000014_3.tif	predator	CF2805	dop1234	7.734	17.443	5.48971	9.91512	4.42541	1	0.29777	2.95243	1.31775
00000014_3.tif	predator	CF2805	dop1234	9.182	20.318	5.48971	11.3339	5.84415	1	0.29777	3.37489	1.74021
00000014_3.tif	predator	CF2805	dop1234	9.547	20.005	5.48971	10.8828	5.39309	1	0.29777	3.24057	1.6059
00000014_3.tif	predator	CF2805	dop1234	13.703	20.245	5.48971	9.8451	4.35539	1	0.29777	2.93158	1.2969
00000014_3.tif	predator	CF2805	dop1234	11.797	17.703	5.48971	7.83165	2.34193	1	0.29777	2.33203	0.697358
00000014_3.tif	predator	CF2805	dop1234	11.234	17.401	5.48971	7.79202	2.30231	1	0.29777	2.32023	0.685559
00000014_3.tif	predator	CF2805	dop1234	10.922	16.63	5.48971	7.27382	1.7841	1	0.29777	2.16592	0.531252
00000014_3.tif	predator	CF2805	dop1234	12.297	16.964	5.48971	6.96051	1.4708	1	0.29777	2.07263	0.43796
00000014_3.tif	predator	CF2805	dop1234	13.161	15.911	5.48971	5.68571	0.195998	1	0.29777	1.69303	0.0583625
00000014_3.tif	predator	CF2805	dop1234	9.911	15.328	5.48971	6.88015	1.39044	1	0.29777	2.0487	0.414031
00000014_3.tif	predator	CF2805	dop1234	10.036	15.078	5.48971	6.61548	1.12577	1	0.29777	1.96989	0.335221
00000014_3.tif	predator	CF2805	dop1234	4.988	12.467	5.48971	9.98715	4.49744	1	0.29777	2.97387	1.3392
00000014_3.tif	predator	CF2805	dop1234	6.405	11.911	5.48971	8.49124	3.00153	1	0.29777	2.52844	0.893765
00000014_3.tif	predator	CF2805	dop1234	9.134	14.231	5.48971	6.78316	1.29345	1	0.29777	2.01982	0.385151
00000014_3.tif	predator	CF2805	dop1234	10.446	12.887	5.48971	4.96041	-0.529303	0	0.29777	1.47706	-0.15761
00000014_3.tif	predator	CF2805	dop1234	10.543	12.804	5.48971	4.83526	-0.654457	0	0.29777	1.43979	-0.194878
00000014_3.tif	predator	CF2805	dop1234	8.175	11.474	5.48971	6.67379	1.18408	1	0.29777	1.98725	0.352583
00000014_3.tif	predator	CF2805	dop1234	9.342	11.418	5.48971	5.51322	0.0235117	1	0.29777	1.64167	0.00700107
00000014_3.tif	predator	CF2805	dop1234	9.696	11.689	5.48971	5.22216	-0.26755	0	0.29777	1.555	-0.0796682
00000014_3.tif	predator	CF2805	dop1234	9.078	10.536	5.48971	5.69353	0.203822	1	0.29777	1.69536	0.060692
00000014_3.tif	predator	CF2805	dop1234	10.745	10.384	5.48971	4.02668	-1.46303	0	0.29777	1.19902	-0.435647
00000014_3.tif	predator	CF2805	dop1234	8.87	7.964	5.48971	6.40639	0.916678	1	0.29777	1.90763	0.272959
00000014_3.tif	predator	CF2805	dop1234	8.856	7.734	5.48971	6.5121	1.02238	1	0.29777	1.93911	0.304435
00000014_3.tif	predator	CF2805	dop1234	8.877	7.533	5.48971	6.57988	1.09017	1	0.29777	1.95929	0.32462
00000014_3.tif	predator	CF2805	dop1234	9.05	7.547	5.48971	6.41902	0.929303	1	0.29777	1.91139	0.276719
00000014_3.tif	predator	CF2805	dop1234	8.543	7.401	5.48971	6.93781	1.4481	1	0.29777	2.06587	0.431201
00000014_3.tif	predator	CF2805	dop1234	7.62	6.908	5.48971	7.98369	2.49398	1	0.29777	2.3773	0.742632
00000014_3.tif	predator	CF2805	dop1234	7.314	6.568	5.48971	8.41064	2.92093	1	0.29777	2.50444	0.869766
00000014_3.tif	predator	CF2805	dop1234	10.925	8.255	5.48971	4.43226	-1.05745	0	0.29777	1.31979	-0.314878
00000014_3.tif	predator	CF2805	dop1234	11.009	7.929	5.48971	4.53304	-0.956669	0	0.29777	1.3498	-0.284867
00000014_3.tif	predator	CF2805	dop1234	12.113	7.609	5.48971	3.89638	-1.59333	0	0.29777	1.16022	-0.474447
00000014_3.tif	predator	CF2805	dop1234	10.377	7.651	5.48971	5.21407	-0.275646	0	0.29777	1.55259	-0.0820792
00000014_3.tif	predator	CF2805	dop1234	9.905	6.644	5.48971	6.1826	0.692888	1	0.29777	1.84099	0.206321
00000014_3.tif	predator	CF2805	dop1234	9.585	5.908	5.48971	6.89906	1.40935	1	0.29777	2.05433	0.419663
00000014_3.tif	predator	CF2805	dop1234	11.391	5.325	5.48971	6.1459	0.656188	1	0.29777	1.83006	0.195393
00000014_3.tif	predator	CF2805	dop1234	11.474	2.415	5.48971	8.69253	3.20282	1	0.29777	2.58837	0.953703
00000014_3.tif	predator	CF2805	dop1234	16.042	1.969	5.48971	8.58362	3.09391	1	0.29777	2.55595	0.921273
00000014_3.tif	predator	CF2805	dop1234	16.297	5.516	5.48971	5.17224	-0.317475	0	0.29777	1.54014	-0.0945346
00000014_3.tif	predator	CF2805	dop1234	14.406	6.005	5.48971	4.46793	-1.02178	0	0.29777	1.33042	-0.304255
00000014_3.tif	predator	CF2805	dop1234	13.865	6.536	5.48971	4.02529	-1.46443	0	0.29777	1.19861	-0.436063
00000014_3.tif	predator	CF2805	dop1234	15.865	9.333	5.48971	1.56922	-3.92049	0	0.29777	0.467268	-1.1674
00000014_3.tif	predator	CF2805	dop1234	12.406	10.016	5.48971	2.40595	-3.08376	0	0.29777	0.716419	-0.918252
00000014_3.tif	predator	CF2805	dop1234	17.208	10.5	5.48971	2.43736	-3.05235	0	0.29777	0.725773	-0.908898
00000014_3.tif	predator	CF2805	dop1234	14.688	10.901	5.48971	0.450708	-5.039	0	0.29777	0.134207	-1.50046
00000014_3.tif	predator	CF2805	dop1234	15.411	11.115	5.48971	0.917196	-4.57252	0	0.29777	0.273114	-1.36156
00000014_3.tif	predator	CF2805	dop1234	15.542	11.135	5.48971	1.02605	-4.46367	0	0.29777	0.305526	-1.32915
00000014_3.tif	predator	CF2805	dop1234	14.297	11.443	5.48971	1.09312	-4.3966	0	0.29777	0.325497	-1.30917
00000014_3.tif	predator	CF2805	dop1234	14.193	11.479	5.48971	1.17325	-4.31646	0	0.29777	0.34936	-1.28531
00000014_3.tif	predator	CF2805	dop1234	14.297	11.557	5.48971	1.19686	-4.29285	0	0.29777	0.356389	-1.27828
00000014_3.tif	predator	CF2805	dop1234	15.12	11.964	5.48971	1.54591	-3.9438	0	0.29777	0.460326	-1.17435
00000014_3.tif	predator	CF2805	dop1234	15.099	12.135	5.48971	1.70878	-3.78094	0	0.29777	0.508822	-1.12585
00000014_3.tif	predator	CF2805	dop1234	14.948	12.161	5.48971	1.71217	-3.77754	0	0.29777	0.509834	-1.12484
00000014_3.tif	predator	CF2805	dop1234	14.828	12.078	5.48971	1.621	-3.86871	0	0.29777	0.482686	-1.15199
00000014_3.tif	predator	CF2805	dop1234	12.458	13.099	5.48971	3.51068	-1.97904	0	0.29777	1.04537	-0.589298
00000014_3.tif	predator	CF2805	dop1234	15.427	15.74	5.48971	5.32258	-0.167132	0	0.29777	1.5849	-0.049767
00000014_3.tif	predator	CF2805	dop1234	15.646	15.672	5.48971	5.28691	-0.202802	0	0.29777	1.57428	-0.0603884
00000014_3.tif	predator	CF2805	dop1234	16.812	16.026	5.48971	5.93029	0.440575	1	0.29777	1.76586	0.13119
00000014_3.tif	predator	CF2805	dop1234	17.234	16.203	5.48971	6.25071	0.760999	1	0.29777	1.86127	0.226603
00000014_3.tif	predator	CF2805	dop1234	16.87	16.422	5.48971	6.32259	0.832874	1	0.29777	1.88268	0.248005
00000014_3.tif	predator	CF2805	dop1234	16.771	16.599	5.48971	6.45847	0.968761	1	0.29777	1.92314	0.288468
00000014_3.tif	predator	CF2805	dop1234	15.312	19.901	5.48971	9.45848	3.96877	1	0.29777	2.81645	1.18178
00000014_3.tif	predator	CF2805	dop1234	15.604	21.042	5.48971	10.6167	5.12702	1	0.29777	3.16134	1.52667
00000014_3.tif	predator	CF2805	dop1234	17.609	19.526	5.48971	9.50173	4.01202	1	0.29777	2.82933	1.19466
00000014_3.tif	predator	CF2805	dop1234	19.688	19.292	5.48971	10.1102	4.6205	1	0.29777	3.01052	1.37585
00000014_3.tif	predator	CF2805	dop1234	19.651	17.318	5.48971	8.41867	2.92896	1	0.29777	2.50683	0.872156
00000014_3.tif	predator	CF2805	dop1234	19.755	17.167	5.48971	8.35769	2.86797	1	0.29777	2.48867	0.853997
00000014_3.tif	predator	CF2805	dop1234	19.995	17.042	5.48971	8.40471	2.915	1	0.29777	2.50267	0.868
00000014_3.tif	predator	CF2805	dop1234	20.276	17	5.48971	8.55002	3.0603	1	0.29777	2.54594	0.911267
00000014_3.tif	predator	CF2805	dop1234	20.526	15.839	5.48971	7.87878	2.38907	1	0.29777	2.34606	0.711393
00000014_3.tif	predator	CF2805	dop1234	18.474	11.594	5.48971	3.87333	-1.61638	0	0.29777	1.15336	-0.481309
00000014_3.tif	predator	CF2805	dop1234	19.068	11.375	5.48971	4.39376	-1.09596	0	0.29777	1.30833	-0.326343
00000014_3.tif	predator	CF2805	dop1234	19.906	10.979	5.48971	5.16136	-0.32835	0	0.29777	1.5369	-0.0977727
00000014_3.tif	predator	CF2805	dop1234	21.526	10.693	5.48971	6.75909	1.26937	1	0.29777	2.01265	0.377981
00000014_3.tif	predator	CF2805	dop1234	21.312	9.943	5.48971	6.56124	1.07153	1	0.29777	1.95374	0.31907
00000014_3.tif	predator	CF2805	dop1234	17.76	8.182	5.48971	3.7569	-1.73281	0	0.29777	1.11869	-0.51598
00000014_3.tif	predator	CF2805	dop1234	18.245	8.818	5.48971	3.84165	-1.64806	0	0.29777	1.14393	-0.490744
00000014_3.tif	predator	CF2805	dop1234	18.714	8.766	5.48971	4.2907	-1.19901	0	0.29777	1.27764	-0.35703
00000014_3.tif	predator	CF2805	dop1234	18.818	8.031	5.48971	4.71896	-0.770757	0	0.29777	1.40516	-0.229508
00000014_3.tif	predator	CF2805	dop1234	20.479	7.917	5.48971	6.24804	0.758323	1	0.29777	1.86048	0.225806
00000014_3.tif	predator	CF2805	dop1234	18.568	6.396	5.48971	5.56031	0.070598	1	0.29777	1.65569	0.021022
00000014_3.tif	predator	CF2805	dop1234	18.167	4.87	5.48971	6.539	1.04929	1	0.29777	1.94712	0.312447
00000014_3.tif	predator	CF2805	dop1234	18.401	4.76	5.48971	6.75604	1.26633	1	0.29777	2.01175	0.377075
00000014_3.tif	predator	CF2805	dop1234	23.932	8.802	5.48971	9.30947	3.81976	1	0.29777	2.77208	1.13741
00000014_3.tif	predator	CF2805	dop1234	23.953	9.516	5.48971	9.23019	3.74048	1	0.29777	2.74847	1.1138
00000014_3.tif	predator	CF2805	dop1234	24.198	9.536	5.48971	9.47198	3.98227	1	0.29777	2.82047	1.1858
00000014_3.tif	predator	CF2805	dop1234	24.24	10.318	5.48971	9.47003	3.98032	1	0.29777	2.81989	1.18522
00000014_3.tif	predator	CF2805	dop1234	23.161	12.682	5.48971	8.67976	3.19005	1	0.29777	2.58457	0.949901
00000014_3.tif	predator	CF2805	dop1234	23.198	14.312	5.48971	9.26648	3.77677	1	0.29777	2.75928	1.12461
00000014_3.tif	predator	CF2805	dop1234	23.766	14.365	5.48971	9.80687	4.31716	1	0.29777	2.92019	1.28552
00000014_3.tif	predator	CF2805	dop1234	23.719	13.422	5.48971	9.42613	3.93642	1	0.29777	2.80682	1.17215
00000014_3.tif	predator	CF2805	dop1234	22.667	15.552	5.48971	9.39658	3.90686	1	0.29777	2.79802	1.16335
00000014_3.tif	predator	CF2805	dop1234	22.875	14.87	5.48971	9.22716	3.73745	1	0.29777	2.74757	1.1129
00000014_3.tif	predator	CF2805	dop1234	22.052	15.125	5.48971	8.64834	3.15863	1	0.29777	2.57522	0.940546
00000014_3.tif	predator	CF2805	dop1234	22.234	18.307	5.48971	10.8307	5.34095	1	0.29777	3.22505	1.59037
0000016_23.tif	predator	RB1254	dop4	4.74	9.521	5.97911	9.18195	3.20285	1	0.29777	2.73411	0.953712
0000016_23.tif	predator	RB1254	dop4	8.179	6.533	5.97911	6.72699	0.747883	1	0.29777	2.0031	0.222697
0000016_23.tif	predator	RB1254	dop4	7.825	7.707	5.97911	6.52109	0.541982	1	0.29777	1.94178	0.161386
0000016_23.tif	predator	RB1254	dop4	8.637	3.085	5.97911	8.74305	2.76394	1	0.29777	2.60342	0.823019
0000016_23.tif	predator	RB1254	dop4	7.936	9.109	5.97911	6.04559	0.0664805	1	0.29777	1.80019	0.0197959
0000016_23.tif	predator	RB1254	dop4	6.769	10.37	5.97911	7.14364	1.16454	1	0.29777	2.12716	0.346764
0000016_23.tif	predator	RB1254	dop4	7.547	10.911	5.97911	6.41543	0.43632	1	0.29777	1.91032	0.129923
0000016_23.tif	predator	RB1254	dop4	6.026	11.95	5.97911	8.10302	2.12392	1	0.29777	2.41284	0.632438
0000016_23.tif	predator	RB1254	dop4	5.894	12.047	5.97911	8.25423	2.27513	1	0.29777	2.45786	0.677465
0000016_23.tif	predator	RB1254	dop4	7.318	12.595	5.97911	7.05817	1.07907	1	0.29777	2.10171	0.321315
0000016_23.tif	predator	RB1254	dop4	7.089	13.033	5.97911	7.43628	1.45718	1	0.29777	2.2143	0.433904
0000016_23.tif	predator	RB1254	dop4	8.019	13.401	5.97911	6.76799	0.788885	1	0.29777	2.0153	0.234906
0000016_23.tif	predator	RB1254	dop4	7.186	14.78	5.97911	8.21084	2.23174	1	0.29777	2.44494	0.664544
0000016_23.tif	predator	RB1254	dop4	6.137	15.613	5.97911	9.54835	3.56924	1	0.29777	2.84321	1.06281
0000016_23.tif	predator	RB1254	dop4	6.672	16.613	5.97911	9.75942	3.78032	1	0.29777	2.90606	1.12567
0000016_23.tif	predator	RB1254	dop4	7.401	16.405	5.97911	9.08563	3.10652	1	0.29777	2.70543	0.92503
0000016_23.tif	predator	RB1254	dop4	6.401	18.352	5.97911	11.1825	5.20343	1	0.29777	3.32982	1.54943
0000016_23.tif	predator	RB1254	dop4	8.123	18.276	5.97911	10.0455	4.06644	1	0.29777	2.99126	1.21086
0000016_23.tif	predator	RB1254	dop4	11.62	21.071	5.97911	11.2438	5.26473	1	0.29777	3.34808	1.56768
0000016_23.tif	predator	RB1254	dop4	9.335	17.557	5.97911	8.7789	2.79979	1	0.29777	2.61409	0.833695
0000016_23.tif	predator	RB1254	dop4	10.05	17.495	5.97911	8.37366	2.39456	1	0.29777	2.49343	0.713027
0000016_23.tif	predator	RB1254	dop4	10.182	17.439	5.97911	8.26367	2.28457	1	0.29777	2.46067	0.680276
0000016_23.tif	predator	RB1254	dop4	10.28	17.425	5.97911	8.20741	2.22831	1	0.29777	2.44392	0.663523
0000016_23.tif	predator	RB1254	dop4	10.231	17.821	5.97911	8.58532	2.60621	1	0.29777	2.55645	0.776052
0000016_23.tif	predator	RB1254	dop4	10.113	18.384	5.97911	9.14563	3.16652	1	0.29777	2.72329	0.942896
0000016_23.tif	predator	RB1254	dop4	12.168	17.856	5.97911	7.98543	2.00632	1	0.29777	2.37782	0.597423
0000016_23.tif	predator	RB1254	dop4	10.023	16.28	5.97911	7.33084	1.35173	1	0.29777	2.1829	0.402506
0000016_23.tif	predator	RB1254	dop4	10.03	15.925	5.97911	7.02838	1.04928	1	0.29777	2.09284	0.312443
0000016_23.tif	predator	RB1254	dop4	9.786	11.901	5.97911	4.5118	-1.46731	0	0.29777	1.34348	-0.43692
0000016_23.tif	predator	RB1254	dop4	9.849	9.797	5.97911	4.06565	-1.91346	0	0.29777	1.21063	-0.569771
0000016_23.tif	predator	RB1254	dop4	9.523	9.033	5.97911	4.50217	-1.47694	0	0.29777	1.34061	-0.439787
0000016_23.tif	predator	RB1254	dop4	9.161	9.054	5.97911	4.85089	-1.12822	0	0.29777	1.44445	-0.33595
0000016_23.tif	predator	RB1254	dop4	9.203	8.092	5.97911	5.09893	-0.880173	0	0.29777	1.51831	-0.262089
0000016_23.tif	predator	RB1254	dop4	8.891	6.863	5.97911	5.94843	-0.0306749	0	0.29777	1.77126	-0.00913406
0000016_23.tif	predator	RB1254	dop4	9.335	6.905	5.97911	5.55524	-0.423866	0	0.29777	1.65418	-0.126214
0000016_23.tif	predator	RB1254	dop4	10.238	6.776	5.97911	4.92463	-1.05447	0	0.29777	1.46641	-0.31399
0000016_23.tif	predator	RB1254	dop4	10.842	6.589	5.97911	4.6314	-1.34771	0	0.29777	1.37909	-0.401308
0000016_23.tif	predator	RB1254	dop4	10.849	6.061	5.97911	5.0352	-0.943904	0	0.29777	1.49933	-0.281066
0000016_23.tif	predator	RB1254	dop4	10.946	4.894	5.97911	5.95565	-0.0234506	0	0.29777	1.77342	-0.00698289
0000016_23.tif	predator	RB1254	dop4	10.981	4.748	5.97911	6.06582	0.0867186	1	0.29777	1.80622	0.0258222
0000016_23.tif	predator	RB1254	dop4	9.543	4.477	5.97911	7.08717	1.10807	1	0.29777	2.11035	0.329949
0000016_23.tif	predator	RB1254	dop4	9.675	4.276	5.97911	7.16793	1.18882	1	0.29777	2.13439	0.353995
0000016_23.tif	predator	RB1254	dop4	8.842	2.998	5.97911	8.69162	2.71251	1	0.29777	2.5881	0.807704
0000016_23.tif	predator	RB1254	dop4	9.536	3.352	5.97911	8.00756	2.02845	1	0.29777	2.38441	0.604013
0000016_23.tif	predator	RB1254	dop4	9.877	3.179	5.97911	7.9755	1.99639	1	0.29777	2.37486	0.594465
0000016_23.tif	predator	RB1254	dop4	14.5	9.693	5.97911	0.699283	-5.27982	0	0.29777	0.208226	-1.57217
0000016_23.tif	predator	RB1254	dop4	14.521	9.964	5.97911	0.622759	-5.35635	0	0.29777	0.185439	-1.59496
0000016_23.tif	predator	RB1254	dop4	12.724	14.13	5.97911	4.23624	-1.74286	0	0.29777	1.26143	-0.518972
0000016_23.tif	predator	RB1254	dop4	13.938	13.547	5.97911	3.48515	-2.49396	0	0.29777	1.03777	-0.742626
0000016_23.tif	predator	RB1254	dop4	15.047	14.38	5.97911	4.46621	-1.5129	0	0.29777	1.3299	-0.450496
0000016_23.tif	predator	RB1254	dop4	15.708	15.099	5.97911	5.34963	-0.629472	0	0.29777	1.59296	-0.187438
0000016_23.tif	predator	RB1254	dop4	15.49	16.25	5.97911	6.38752	0.408414	1	0.29777	1.90201	0.121613
0000016_23.tif	predator	RB1254	dop4	14.474	17.589	5.97911	7.5484	1.5693	1	0.29777	2.24769	0.467289
0000016_23.tif	predator	RB1254	dop4	14.255	18.422	5.97911	8.36728	2.38818	1	0.29777	2.49153	0.711127
0000016_23.tif	predator	RB1254	dop4	15.25	18.266	5.97911	8.31336	2.33425	1	0.29777	2.47547	0.695071
0000016_23.tif	predator	RB1254	dop4	14.823	19.906	5.97911	9.88662	3.90751	1	0.29777	2.94394	1.16354
0000016_23.tif	predator	RB1254	dop4	15.651	20.484	5.97911	10.5671	4.58797	1	0.29777	3.14656	1.36616
0000016_23.tif	predator	RB1254	dop4	16.771	19.177	5.97911	9.55466	3.57555	1	0.29777	2.84509	1.06469
0000016_23.tif	predator	RB1254	dop4	18.474	19.068	5.97911	10.0983	4.11914	1	0.29777	3.00696	1.22656
0000016_23.tif	predator	RB1254	dop4	18.531	14.531	5.97911	6.43138	0.45227	1	0.29777	1.91507	0.134672
0000016_23.tif	predator	RB1254	dop4	17.708	13.969	5.97911	5.45159	-0.527514	0	0.29777	1.62332	-0.157078
0000016_23.tif	predator	RB1254	dop4	17.453	12.422	5.97911	4.26038	-1.71873	0	0.29777	1.26861	-0.511786
0000016_23.tif	predator	RB1254	dop4	17.599	12.375	5.97911	4.35755	-1.62156	0	0.29777	1.29755	-0.482851
0000016_23.tif	predator	RB1254	dop4	16.745	12.078	5.97911	3.48198	-2.49713	0	0.29777	1.03683	-0.743569
0000016_23.tif	predator	RB1254	dop4	15.969	11.615	5.97911	2.5822	-3.3969	0	0.29777	0.768903	-1.0115
0000016_23.tif	predator	RB1254	dop4	18.365	10.844	5.97911	4.52705	-1.45205	0	0.29777	1.34802	-0.432378
0000016_23.tif	predator	RB1254	dop4	18.146	9.562	5.97911	4.26938	-1.70973	0	0.29777	1.27129	-0.509105
0000016_23.tif	predator	RB1254	dop4	18.073	9.286	5.97911	4.23864	-1.74047	0	0.29777	1.26214	-0.518259
0000016_23.tif	predator	RB1254	dop4	16.594	9.057	5.97911	2.86973	-3.10937	0	0.29777	0.85452	-0.925878
0000016_23.tif	predator	RB1254	dop4	18.182	8.245	5.97911	4.64604	-1.33307	0	0.29777	1.38345	-0.396948
0000016_23.tif	predator	RB1254	dop4	18.12	7.875	5.97911	4.74771	-1.23139	0	0.29777	1.41373	-0.366672
0000016_23.tif	predator	RB1254	dop4	18.078	7.146	5.97911	5.09005	-0.889052	0	0.29777	1.51567	-0.264733
0000016_23.tif	predator	RB1254	dop4	17.688	6.729	5.97911	5.04107	-0.938033	0	0.29777	1.50108	-0.279318
0000016_23.tif	predator	RB1254	dop4	16.859	6.714	5.97911	4.46423	-1.51488	0	0.29777	1.32931	-0.451086
0000016_23.tif	predator	RB1254	dop4	17.391	6.312	5.97911	5.11935	-0.859757	0	0.29777	1.52439	-0.25601
0000016_23.tif	predator	RB1254	dop4	17.458	5.938	5.97911	5.4428	-0.536305	0	0.29777	1.6207	-0.159695
0000016_23.tif	predator	RB1254	dop4	16.271	4.312	5.97911	6.21737	0.238267	1	0.29777	1.85135	0.0709489
0000016_23.tif	predator	RB1254	dop4	19.734	4.969	5.97911	7.73978	1.76068	1	0.29777	2.30468	0.524277
0000016_23.tif	predator	RB1254	dop4	20.104	5.047	5.97911	7.97279	1.99369	1	0.29777	2.37406	0.59366
0000016_23.tif	predator	RB1254	dop4	20.271	4.938	5.97911	8.17121	2.1921	1	0.29777	2.43314	0.652742
0000016_23.tif	predator	RB1254	dop4	20.625	6.99	5.97911	7.38797	1.40887	1	0.29777	2.19992	0.419518
0000016_23.tif	predator	RB1254	dop4	20.047	7.844	5.97911	6.52927	0.550168	1	0.29777	1.94422	0.163823
0000016_23.tif	predator	RB1254	dop4	19.917	8.177	5.97911	6.29963	0.320525	1	0.29777	1.87584	0.0954428
0000016_23.tif	predator	RB1254	dop4	20.406	9.312	5.97911	6.54313	0.564021	1	0.29777	1.94835	0.167948
0000016_23.tif	predator	RB1254	dop4	20.578	10.708	5.97911	6.7032	0.724095	1	0.29777	1.99601	0.215614
0000016_23.tif	predator	RB1254	dop4	19.234	10.839	5.97911	5.38436	-0.594747	0	0.29777	1.6033	-0.177098
0000016_23.tif	predator	RB1254	dop4	18.995	11.594	5.97911	5.3146	-0.664508	0	0.29777	1.58253	-0.197871
0000016_23.tif	predator	RB1254	dop4	18.896	11.682	5.97911	5.24638	-0.732726	0	0.29777	1.56221	-0.218184
0000016_23.tif	predator	RB1254	dop4	19.677	12.495	5.97911	6.2629	0.283796	1	0.29777	1.8649	0.0845058
0000016_23.tif	predator	RB1254	dop4	20.026	12.698	5.97911	6.66355	0.684444	1	0.29777	1.98421	0.203807
0000016_23.tif	predator	RB1254	dop4	20.297	12.724	5.97911	6.92323	0.944125	1	0.29777	2.06153	0.281132
0000016_23.tif	predator	RB1254	dop4	19.266	13.276	5.97911	6.24975	0.270646	1	0.29777	1.86099	0.0805903
0000016_23.tif	predator	RB1254	dop4	19.021	13.401	5.97911	6.10837	0.129261	1	0.29777	1.81889	0.0384902
0000016_23.tif	predator	RB1254	dop4	19.12	16.984	5.97911	8.66602	2.68691	1	0.29777	2.58048	0.800082
0000016_23.tif	predator	RB1254	dop4	21.964	12.161	5.97911	8.32689	2.34779	1	0.29777	2.4795	0.699101
0000016_23.tif	predator	RB1254	dop4	21.672	11.474	5.97911	7.89332	1.91421	1	0.29777	2.35039	0.569996
0000016_23.tif	predator	RB1254	dop4	22.021	11.495	5.97911	8.24055	2.26145	1	0.29777	2.45379	0.673391
0000016_23.tif	predator	RB1254	dop4	21.333	7.641	5.97911	7.81163	1.83253	1	0.29777	2.32607	0.545671
0000017_21.tif	control	RB1254	dop4	6.042	10.365	5.15102	7.76111	2.61008	1	0.29777	2.31102	0.777204
0000017_21.tif	control	RB1254	dop4	10.375	13.406	5.15102	4.24448	-0.906545	0	0.29777	1.26388	-0.269942
0000017_21.tif	control	RB1254	dop4	10.474	13.37	5.15102	4.1436	-1.00742	0	0.29777	1.23384	-0.29998
0000017_21.tif	control	RB1254	dop4	11.604	14.068	5.15102	3.86322	-1.2878	0	0.29777	1.15035	-0.383469
0000017_21.tif	control	RB1254	dop4	10.76	12.365	5.15102	3.37074	-1.78028	0	0.29777	1.00371	-0.530114
0000017_21.tif	control	RB1254	dop4	9.807	11.443	5.15102	4.01863	-1.13239	0	0.29777	1.19663	-0.337192
0000017_21.tif	control	RB1254	dop4	10.328	10.719	5.15102	3.46175	-1.68928	0	0.29777	1.0308	-0.503016
0000017_21.tif	control	RB1254	dop4	10.646	10.568	5.15102	3.15546	-1.99556	0	0.29777	0.939602	-0.594218
0000017_21.tif	control	RB1254	dop4	10.526	10.214	5.15102	3.32733	-1.82369	0	0.29777	0.99078	-0.54304
0000017_21.tif	control	RB1254	dop4	10.312	9.547	5.15102	3.72096	-1.43006	0	0.29777	1.10799	-0.425829
0000017_21.tif	control	RB1254	dop4	10.339	9.385	5.15102	3.75724	-1.39379	0	0.29777	1.11879	-0.415028
0000017_21.tif	control	RB1254	dop4	9.969	9.302	5.15102	4.13032	-1.0207	0	0.29777	1.22989	-0.303934
0000017_21.tif	control	RB1254	dop4	9.865	9.333	5.15102	4.21515	-0.935878	0	0.29777	1.25514	-0.278676
0000017_21.tif	control	RB1254	dop4	11.651	9.188	5.15102	2.72417	-2.42686	0	0.29777	0.811175	-0.722645
0000017_21.tif	control	RB1254	dop4	11.646	9.073	5.15102	2.80087	-2.35016	0	0.29777	0.834014	-0.699806
0000017_21.tif	control	RB1254	dop4	11.089	8.365	5.15102	3.68769	-1.46334	0	0.29777	1.09808	-0.435738
0000017_21.tif	control	RB1254	dop4	11.021	8.391	5.15102	3.72026	-1.43076	0	0.29777	1.10778	-0.426038
0000017_21.tif	control	RB1254	dop4	10.234	8.526	5.15102	4.26122	-0.8898	0	0.29777	1.26886	-0.264956
0000017_21.tif	control	RB1254	dop4	13.438	6.359	5.15102	4.53437	-0.616649	0	0.29777	1.3502	-0.18362
0000017_21.tif	control	RB1254	dop4	13.198	6.823	5.15102	4.09939	-1.05163	0	0.29777	1.22068	-0.313145
0000017_21.tif	control	RB1254	dop4	13.948	6.656	5.15102	4.22711	-0.923918	0	0.29777	1.25871	-0.275115
0000017_21.tif	control	RB1254	dop4	14.37	6.625	5.15102	4.29489	-0.856133	0	0.29777	1.27889	-0.254931
0000017_21.tif	control	RB1254	dop4	14.339	6.51	5.15102	4.40485	-0.746172	0	0.29777	1.31163	-0.222188
0000017_21.tif	control	RB1254	dop4	14.354	6.906	5.15102	4.01439	-1.13664	0	0.29777	1.19536	-0.338456
0000017_21.tif	control	RB1254	dop4	14.411	7.068	5.15102	3.8629	-1.28813	0	0.29777	1.15025	-0.383565
0000017_21.tif	control	RB1254	dop4	13.797	7.156	5.15102	3.72402	-1.42701	0	0.29777	1.1089	-0.42492
0000017_21.tif	control	RB1254	dop4	13.797	7.276	5.15102	3.60402	-1.54701	0	0.29777	1.07317	-0.460652
0000017_21.tif	control	RB1254	dop4	11.885	8.245	5.15102	3.24916	-1.90187	0	0.29777	0.967502	-0.566318
0000017_21.tif	control	RB1254	dop4	12.901	8.109	5.15102	2.90889	-2.24213	0	0.29777	0.866181	-0.667639
0000017_21.tif	control	RB1254	dop4	13.49	7.927	5.15102	2.9678	-2.18323	0	0.29777	0.883721	-0.650099
0000017_21.tif	control	RB1254	dop4	13.734	7.745	5.15102	3.13543	-2.01559	0	0.29777	0.933637	-0.600183
0000017_21.tif	control	RB1254	dop4	13.286	8.359	5.15102	2.57011	-2.58092	0	0.29777	0.7653	-0.76852
0000017_21.tif	control	RB1254	dop4	13.375	8.339	5.15102	2.57402	-2.577	0	0.29777	0.766467	-0.767353
0000017_21.tif	control	RB1254	dop4	12.854	8.802	5.15102	2.27743	-2.87359	0	0.29777	0.678152	-0.855668
0000017_21.tif	control	RB1254	dop4	13.01	8.807	5.15102	2.21348	-2.93754	0	0.29777	0.659109	-0.874711
0000017_21.tif	control	RB1254	dop4	13.13	8.745	5.15102	2.23351	-2.91751	0	0.29777	0.665072	-0.868748
0000017_21.tif	control	RB1254	dop4	12.214	9.141	5.15102	2.34421	-2.80682	0	0.29777	0.698034	-0.835786
0000017_21.tif	control	RB1254	dop4	12.349	9.182	5.15102	2.22445	-2.92657	0	0.29777	0.662374	-0.871446
0000017_21.tif	control	RB1254	dop4	12.776	9.557	5.15102	1.66446	-3.48656	0	0.29777	0.495626	-1.03819
0000017_21.tif	control	RB1254	dop4	13.609	8.849	5.15102	2.0387	-3.11232	0	0.29777	0.607063	-0.926757
0000017_21.tif	control	RB1254	dop4	13.833	8.651	5.15102	2.2295	-2.92153	0	0.29777	0.663877	-0.869943
0000017_21.tif	control	RB1254	dop4	14.193	8.443	5.15102	2.47075	-2.68027	0	0.29777	0.735716	-0.798104
0000017_21.tif	control	RB1254	dop4	14.224	8.318	5.15102	2.59917	-2.55185	0	0.29777	0.773955	-0.759865
0000017_21.tif	control	RB1254	dop4	14.385	8.443	5.15102	2.50954	-2.64149	0	0.29777	0.747264	-0.786556
0000017_21.tif	control	RB1254	dop4	14.438	8.245	5.15102	2.71447	-2.43656	0	0.29777	0.808287	-0.725533
0000017_21.tif	control	RB1254	dop4	14.5	8.479	5.15102	2.50491	-2.64611	0	0.29777	0.745888	-0.787932
0000017_21.tif	control	RB1254	dop4	14.438	8.677	5.15102	2.29746	-2.85357	0	0.29777	0.684114	-0.849706
0000017_21.tif	control	RB1254	dop4	14.385	9.391	5.15102	1.60497	-3.54606	0	0.29777	0.477911	-1.05591
0000017_21.tif	control	RB1254	dop4	14.042	9.266	5.15102	1.63418	-3.51685	0	0.29777	0.486609	-1.04721
0000017_21.tif	control	RB1254	dop4	13.125	9.948	5.15102	1.1426	-4.00842	0	0.29777	0.340233	-1.19359
0000017_21.tif	control	RB1254	dop4	13.573	10.062	5.15102	0.845277	-4.30575	0	0.29777	0.251698	-1.28212
0000017_21.tif	control	RB1254	dop4	14.411	10.438	5.15102	0.765499	-4.38552	0	0.29777	0.227943	-1.30588
0000017_21.tif	control	RB1254	dop4	14.411	10.562	5.15102	0.701248	-4.44977	0	0.29777	0.208811	-1.32501
0000017_21.tif	control	RB1254	dop4	14.495	10.646	5.15102	0.746617	-4.40441	0	0.29777	0.22232	-1.3115
0000017_21.tif	control	RB1254	dop4	14.547	10.771	5.15102	0.768767	-4.38226	0	0.29777	0.228916	-1.3049
0000017_21.tif	control	RB1254	dop4	13.901	10.547	5.15102	0.352298	-4.79872	0	0.29777	0.104904	-1.42892
0000017_21.tif	control	RB1254	dop4	13.885	10.87	5.15102	0.0995038	-5.05152	0	0.29777	0.0296292	-1.50419
0000017_21.tif	control	RB1254	dop4	14.047	10.995	5.15102	0.285212	-4.86581	0	0.29777	0.0849276	-1.44889
0000017_21.tif	control	RB1254	dop4	12.448	11.016	5.15102	1.34489	-3.80613	0	0.29777	0.400469	-1.13335
0000017_21.tif	control	RB1254	dop4	12.458	11.266	5.15102	1.38296	-3.76806	0	0.29777	0.411804	-1.12202
0000017_21.tif	control	RB1254	dop4	12.958	11.271	5.15102	0.915677	-4.23535	0	0.29777	0.272661	-1.26116
0000017_21.tif	control	RB1254	dop4	12.656	11.51	5.15102	1.29375	-3.85727	0	0.29777	0.385241	-1.14858
0000017_21.tif	control	RB1254	dop4	11.953	12.812	5.15102	2.66318	-2.48785	0	0.29777	0.793014	-0.740806
0000017_21.tif	control	RB1254	dop4	12.245	12.51	5.15102	2.24312	-2.9079	0	0.29777	0.667933	-0.865887
0000017_21.tif	control	RB1254	dop4	12.938	12.344	5.15102	1.69186	-3.45916	0	0.29777	0.503786	-1.03003
0000017_21.tif	control	RB1254	dop4	13.026	12.589	5.15102	1.87037	-3.28065	0	0.29777	0.55694	-0.97688
0000017_21.tif	control	RB1254	dop4	13.208	12.51	5.15102	1.72945	-3.42158	0	0.29777	0.514977	-1.01884
0000017_21.tif	control	RB1254	dop4	13.172	12.24	5.15102	1.49218	-3.65884	0	0.29777	0.444326	-1.08949
0000017_21.tif	control	RB1254	dop4	13.318	12.766	5.15102	1.9432	-3.20782	0	0.29777	0.578626	-0.955194
0000017_21.tif	control	RB1254	dop4	13.49	12.771	5.15102	1.91403	-3.237	0	0.29777	0.56994	-0.963881
0000017_21.tif	control	RB1254	dop4	14.312	12.948	5.15102	2.13385	-3.01718	0	0.29777	0.635395	-0.898425
0000017_21.tif	control	RB1254	dop4	14.505	12.052	5.15102	1.37497	-3.77605	0	0.29777	0.409425	-1.1244
0000017_21.tif	control	RB1254	dop4	11.99	13.38	5.15102	3.07825	-2.07277	0	0.29777	0.91661	-0.61721
0000017_21.tif	control	RB1254	dop4	11.964	13.516	5.15102	3.2044	-1.94662	0	0.29777	0.954174	-0.579646
0000017_21.tif	control	RB1254	dop4	12.807	13.677	5.15102	2.96338	-2.18764	0	0.29777	0.882407	-0.651413
0000017_21.tif	control	RB1254	dop4	13.438	13.802	5.15102	2.94265	-2.20837	0	0.29777	0.876233	-0.657587
0000017_21.tif	control	RB1254	dop4	13.5	14.286	5.15102	3.41799	-1.73304	0	0.29777	1.01777	-0.516046
0000017_21.tif	control	RB1254	dop4	13.99	14.109	5.15102	3.23544	-1.91559	0	0.29777	0.963416	-0.570404
0000017_21.tif	control	RB1254	dop4	14.396	13.531	5.15102	2.72028	-2.43075	0	0.29777	0.810017	-0.723804
0000017_21.tif	control	RB1254	dop4	13.948	15.104	5.15102	4.22711	-0.923918	0	0.29777	1.25871	-0.275115
0000017_21.tif	control	RB1254	dop4	14.172	15.312	5.15102	4.44878	-0.702246	0	0.29777	1.32471	-0.209108
0000017_21.tif	control	RB1254	dop4	12.453	15.099	5.15102	4.42457	-0.72645	0	0.29777	1.31751	-0.216315
0000017_21.tif	control	RB1254	dop4	14.656	14.339	5.15102	3.56673	-1.58429	0	0.29777	1.06207	-0.471754
0000017_21.tif	control	RB1254	dop4	14.651	13.198	5.15102	2.47414	-2.67689	0	0.29777	0.736723	-0.797097
0000017_21.tif	control	RB1254	dop4	14.781	13.24	5.15102	2.56118	-2.58985	0	0.29777	0.762642	-0.771179
0000017_21.tif	control	RB1254	dop4	14.833	13.161	5.15102	2.50981	-2.64121	0	0.29777	0.747348	-0.786473
0000017_21.tif	control	RB1254	dop4	15.214	12.995	5.15102	2.55194	-2.59908	0	0.29777	0.759892	-0.773928
0000017_21.tif	control	RB1254	dop4	15.531	13.245	5.15102	2.93909	-2.21193	0	0.29777	0.875173	-0.658647
0000017_21.tif	control	RB1254	dop4	16.219	13.286	5.15102	3.42174	-1.72928	0	0.29777	1.01889	-0.514928
0000017_21.tif	control	RB1254	dop4	16.12	13.542	5.15102	3.54031	-1.61071	0	0.29777	1.0542	-0.479622
0000017_21.tif	control	RB1254	dop4	16.479	13.948	5.15102	4.08226	-1.06876	0	0.29777	1.21558	-0.318245
0000017_21.tif	control	RB1254	dop4	16.469	14.089	5.15102	4.18284	-0.968181	0	0.29777	1.24552	-0.288295
0000017_21.tif	control	RB1254	dop4	16.417	14.141	5.15102	4.19002	-0.961001	0	0.29777	1.24766	-0.286157
0000017_21.tif	control	RB1254	dop4	16.74	14.385	5.15102	4.58379	-0.567232	0	0.29777	1.36492	-0.168905
0000017_21.tif	control	RB1254	dop4	16.792	14.552	5.15102	4.74548	-0.405539	0	0.29777	1.41306	-0.120757
0000017_21.tif	control	RB1254	dop4	17.031	14.594	5.15102	4.93192	-0.219104	0	0.29777	1.46858	-0.0652427
0000017_21.tif	control	RB1254	dop4	16.964	14.12	5.15102	4.53842	-0.6126	0	0.29777	1.35141	-0.182414
0000017_21.tif	control	RB1254	dop4	17.089	14.099	5.15102	4.61213	-0.53889	0	0.29777	1.37335	-0.160465
0000017_21.tif	control	RB1254	dop4	16.88	13.677	5.15102	4.17086	-0.980166	0	0.29777	1.24196	-0.291864
0000017_21.tif	control	RB1254	dop4	16.786	13.51	5.15102	3.9896	-1.16142	0	0.29777	1.18798	-0.345837
0000017_21.tif	control	RB1254	dop4	16.76	13.396	5.15102	3.8955	-1.25552	0	0.29777	1.15996	-0.373857
0000017_21.tif	control	RB1254	dop4	16.677	13.312	5.15102	3.7779	-1.37313	0	0.29777	1.12494	-0.408876
0000017_21.tif	control	RB1254	dop4	17.365	13.339	5.15102	4.34234	-0.808682	0	0.29777	1.29302	-0.240801
0000017_21.tif	control	RB1254	dop4	17.339	13.094	5.15102	4.18636	-0.964664	0	0.29777	1.24657	-0.287248
0000017_21.tif	control	RB1254	dop4	14.755	12.057	5.15102	1.52456	-3.62646	0	0.29777	0.453969	-1.07985
0000017_21.tif	control	RB1254	dop4	15.786	12.318	5.15102	2.4633	-2.68772	0	0.29777	0.733497	-0.800323
0000017_21.tif	control	RB1254	dop4	16.641	12.969	5.15102	3.53765	-1.61338	0	0.29777	1.05341	-0.480415
0000017_21.tif	control	RB1254	dop4	16.844	12.828	5.15102	3.62575	-1.52527	0	0.29777	1.07964	-0.45418
0000017_21.tif	control	RB1254	dop4	16.833	12.505	5.15102	3.45324	-1.69779	0	0.29777	1.02827	-0.50555
0000017_21.tif	control	RB1254	dop4	17.531	12.609	5.15102	4.12486	-1.02616	0	0.29777	1.22826	-0.305561
0000017_21.tif	control	RB1254	dop4	17.49	12.182	5.15102	3.92617	-1.22485	0	0.29777	1.1691	-0.364724
0000017_21.tif	control	RB1254	dop4	17.719	11.927	5.15102	4.06998	-1.08105	0	0.29777	1.21192	-0.321904
0000017_21.tif	control	RB1254	dop4	17.5	11.839	5.15102	3.83582	-1.31521	0	0.29777	1.14219	-0.39163
0000017_21.tif	control	RB1254	dop4	17.479	11.661	5.15102	3.77468	-1.37634	0	0.29777	1.12399	-0.409834
0000017_21.tif	control	RB1254	dop4	14.63	10.979	5.15102	0.849786	-4.30124	0	0.29777	0.253041	-1.28078
0000017_21.tif	control	RB1254	dop4	14.948	11.135	5.15102	1.18965	-3.96137	0	0.29777	0.354242	-1.17958
0000017_21.tif	control	RB1254	dop4	14.781	10.448	5.15102	1.08473	-4.06629	0	0.29777	0.323001	-1.21082
0000017_21.tif	control	RB1254	dop4	14.938	10.391	5.15102	1.25149	-3.89953	0	0.29777	0.372656	-1.16116
0000017_21.tif	control	RB1254	dop4	15.151	10.49	5.15102	1.41962	-3.7314	0	0.29777	0.422721	-1.1111
0000017_21.tif	control	RB1254	dop4	15.219	10.625	5.15102	1.45551	-3.69551	0	0.29777	0.433408	-1.10041
0000017_21.tif	control	RB1254	dop4	15.323	10.37	5.15102	1.6194	-3.53162	0	0.29777	0.48221	-1.05161
0000017_21.tif	control	RB1254	dop4	15.625	10.99	5.15102	1.84229	-3.30874	0	0.29777	0.548578	-0.985242
0000017_21.tif	control	RB1254	dop4	15.75	10.823	5.15102	1.96483	-3.1862	0	0.29777	0.585067	-0.948754
0000017_21.tif	control	RB1254	dop4	15.745	10.26	5.15102	2.05477	-3.09625	0	0.29777	0.611849	-0.921971
0000017_21.tif	control	RB1254	dop4	16.193	10.552	5.15102	2.42925	-2.72178	0	0.29777	0.723356	-0.810464
0000017_21.tif	control	RB1254	dop4	16.391	10.365	5.15102	2.65542	-2.4956	0	0.29777	0.790704	-0.743116
0000017_21.tif	control	RB1254	dop4	16.297	10.958	5.15102	2.51221	-2.63881	0	0.29777	0.748061	-0.785759
0000017_21.tif	control	RB1254	dop4	16.885	11.516	5.15102	3.16359	-1.98743	0	0.29777	0.942022	-0.591798
0000017_21.tif	control	RB1254	dop4	17.255	11.042	5.15102	3.47278	-1.67824	0	0.29777	1.03409	-0.49973
0000017_21.tif	control	RB1254	dop4	15.906	9.656	5.15102	2.44797	-2.70305	0	0.29777	0.728933	-0.804887
0000017_21.tif	control	RB1254	dop4	14.948	8.859	5.15102	2.33124	-2.81978	0	0.29777	0.694174	-0.839646
0000017_21.tif	control	RB1254	dop4	15.635	8.75	5.15102	2.82059	-2.33044	0	0.29777	0.839886	-0.693934
0000017_21.tif	control	RB1254	dop4	16.734	10.375	5.15102	2.99094	-2.16008	0	0.29777	0.890613	-0.643208
0000017_21.tif	control	RB1254	dop4	16.812	10.339	5.15102	3.07398	-2.07704	0	0.29777	0.915339	-0.618481
0000017_21.tif	control	RB1254	dop4	16.833	10.396	5.15102	3.0852	-2.06582	0	0.29777	0.91868	-0.61514
0000017_21.tif	control	RB1254	dop4	17.026	10.427	5.15102	3.27151	-1.87951	0	0.29777	0.974159	-0.559661
[truncated: 19,294 more rows]
