# Supplementary material for: Dopamine signaling regulates predator-driven changes in Caenorhabditis elegans’ egg laying behavior
Source: eLife. 2023 Jul 11;12:e83957. doi: 10.7554/eLife.83957 (PMC10335835; doi:10.7554/eLife.83957)
Supplement: Figure 9—source data 1. — For each test arena, data tabulate the arena, predator exposure condition, genotype, <x,y> coordinates in pixels, lawn radius in pixels, the egg distance from arena center in pixels, the egg distance from lawn edge in pixels, position as 1 (off) or 0 (on) lawn, the conversion factor for pixel data in mm-per-pixel, the calculated distance from center in mm, the calculated distance from the lawn edge in mm. [file elife-83957-fig9-data1.xlsx]

## Sheet: Figure9A-C
Arena	Condition	Strain	Genotype	X	Y	LawnRadius	DistCenterPx	DistEdgePx	off	PxScale	DistCenterMm	DistEdgeMm
00000000_2.tif	control	IV984	d14	6.615	10.516	5.8594	7.13682	1.27742	1	0.29777	2.12513	0.380378
00000000_2.tif	control	IV984	d14	6.708	10.536	5.8594	7.04306	1.18365	1	0.29777	2.09721	0.352457
00000000_2.tif	control	IV984	d14	7.443	18.917	5.8594	10.2541	4.39473	1	0.29777	3.05337	1.30862
00000000_2.tif	control	IV984	d14	7.427	18.708	5.8594	10.1001	4.24067	1	0.29777	3.0075	1.26275
00000000_2.tif	control	IV984	d14	7.177	16.932	5.8594	8.96646	3.10706	1	0.29777	2.66994	0.925189
00000000_2.tif	control	IV984	d14	10.745	16.432	5.8594	6.35648	0.497077	1	0.29777	1.89277	0.148015
00000000_2.tif	control	IV984	d14	10.406	16.026	5.8594	6.17804	0.318634	1	0.29777	1.83963	0.0948797
00000000_2.tif	control	IV984	d14	9.922	15.932	5.8594	6.377	0.5176	1	0.29777	1.89888	0.154126
00000000_2.tif	control	IV984	d14	9.823	15.823	5.8594	6.35076	0.491355	1	0.29777	1.89106	0.146311
00000000_2.tif	control	IV984	d14	9.964	15.802	5.8594	6.24793	0.388529	1	0.29777	1.86045	0.115692
00000000_2.tif	control	IV984	d14	9.885	15.682	5.8594	6.20169	0.342285	1	0.29777	1.84668	0.101922
00000000_2.tif	control	IV984	d14	9.432	15.708	5.8594	6.51279	0.653384	1	0.29777	1.93931	0.194558
00000000_2.tif	control	IV984	d14	9.365	15.604	5.8594	6.48032	0.620921	1	0.29777	1.92965	0.184892
00000000_2.tif	control	IV984	d14	9.281	15.604	5.8594	6.53739	0.677989	1	0.29777	1.94664	0.201885
00000000_2.tif	control	IV984	d14	7.875	15.427	5.8594	7.45706	1.59766	1	0.29777	2.22049	0.475734
00000000_2.tif	control	IV984	d14	7.62	14.719	5.8594	7.25641	1.39701	1	0.29777	2.16074	0.415988
00000000_2.tif	control	IV984	d14	8.786	14.76	5.8594	6.32869	0.469288	1	0.29777	1.88449	0.13974
00000000_2.tif	control	IV984	d14	8.755	15.073	5.8594	6.55135	0.691944	1	0.29777	1.95079	0.20604
00000000_2.tif	control	IV984	d14	8.87	15.099	5.8594	6.48129	0.621884	1	0.29777	1.92993	0.185178
00000000_2.tif	control	IV984	d14	9.516	14.995	5.8594	5.93703	0.0776289	1	0.29777	1.76787	0.0231156
00000000_2.tif	control	IV984	d14	9.552	14.693	5.8594	5.70258	-0.156817	0	0.29777	1.69806	-0.0466953
00000000_2.tif	control	IV984	d14	9.427	14.016	5.8594	5.36735	-0.492049	0	0.29777	1.59824	-0.146518
00000000_2.tif	control	IV984	d14	9.938	14.156	5.8594	5.05656	-0.802838	0	0.29777	1.50569	-0.239061
00000000_2.tif	control	IV984	d14	9.932	14.26	5.8594	5.13007	-0.729334	0	0.29777	1.52758	-0.217174
00000000_2.tif	control	IV984	d14	9.995	13.927	5.8594	4.8648	-0.994599	0	0.29777	1.44859	-0.296162
00000000_2.tif	control	IV984	d14	10.302	14.031	5.8594	4.70249	-1.15691	0	0.29777	1.40026	-0.344492
00000000_2.tif	control	IV984	d14	10.234	14.094	5.8594	4.79519	-1.06421	0	0.29777	1.42786	-0.316889
00000000_2.tif	control	IV984	d14	10.224	14.172	5.8594	4.8559	-1.0035	0	0.29777	1.44594	-0.298812
00000000_2.tif	control	IV984	d14	10.146	14.323	5.8594	5.01675	-0.842647	0	0.29777	1.49384	-0.250915
00000000_2.tif	control	IV984	d14	10.365	13.901	5.8594	4.56812	-1.29128	0	0.29777	1.36025	-0.384505
00000000_2.tif	control	IV984	d14	10.453	14.396	5.8594	4.85468	-1.00472	0	0.29777	1.44558	-0.299177
00000000_2.tif	control	IV984	d14	11.01	14.719	5.8594	4.75606	-1.10334	0	0.29777	1.41621	-0.328542
00000000_2.tif	control	IV984	d14	10.859	14.177	5.8594	4.42095	-1.43845	0	0.29777	1.31643	-0.428328
00000000_2.tif	control	IV984	d14	7.339	13.401	5.8594	6.90342	1.04402	1	0.29777	2.05563	0.310876
00000000_2.tif	control	IV984	d14	7.344	13.25	5.8594	6.84389	0.984492	1	0.29777	2.03791	0.293152
00000000_2.tif	control	IV984	d14	8.203	13.047	5.8594	5.96973	0.110333	1	0.29777	1.77761	0.0328537
00000000_2.tif	control	IV984	d14	8.63	12.859	5.8594	5.50347	-0.355931	0	0.29777	1.63877	-0.105986
00000000_2.tif	control	IV984	d14	9.734	13.156	5.8594	4.63764	-1.22176	0	0.29777	1.38095	-0.363804
00000000_2.tif	control	IV984	d14	9.792	12.865	5.8594	4.44697	-1.41243	0	0.29777	1.32418	-0.420579
00000000_2.tif	control	IV984	d14	10.974	13.016	5.8594	3.53069	-2.32871	0	0.29777	1.05133	-0.69342
00000000_2.tif	control	IV984	d14	11.448	12.51	5.8594	2.84699	-3.01241	0	0.29777	0.847747	-0.897007
00000000_2.tif	control	IV984	d14	9.672	11.458	5.8594	4.12144	-1.73797	0	0.29777	1.22724	-0.517514
00000000_2.tif	control	IV984	d14	11.438	13.781	5.8594	3.74733	-2.11207	0	0.29777	1.11584	-0.628912
00000000_2.tif	control	IV984	d14	7.146	9.177	5.8594	6.8024	0.942995	1	0.29777	2.02555	0.280796
00000000_2.tif	control	IV984	d14	7.318	9.13	5.8594	6.64752	0.788119	1	0.29777	1.97943	0.234678
00000000_2.tif	control	IV984	d14	8.974	8.208	5.8594	5.44305	-0.416347	0	0.29777	1.62078	-0.123976
00000000_2.tif	control	IV984	d14	9.078	7.995	5.8594	5.45956	-0.399843	0	0.29777	1.62569	-0.119061
00000000_2.tif	control	IV984	d14	9.089	8.281	5.8594	5.30712	-0.552279	0	0.29777	1.5803	-0.164452
00000000_2.tif	control	IV984	d14	9.344	8.302	5.8594	5.07439	-0.785007	0	0.29777	1.511	-0.233752
00000000_2.tif	control	IV984	d14	10.036	7.859	5.8594	4.75096	-1.10844	0	0.29777	1.41469	-0.33006
00000000_2.tif	control	IV984	d14	10.167	8.589	5.8594	4.22081	-1.6386	0	0.29777	1.25683	-0.487925
00000000_2.tif	control	IV984	d14	10.359	8.724	5.8594	3.98645	-1.87295	0	0.29777	1.18705	-0.557708
00000000_2.tif	control	IV984	d14	10.396	8.667	5.8594	3.98569	-1.87371	0	0.29777	1.18682	-0.557935
00000000_2.tif	control	IV984	d14	10.49	9.396	5.8594	3.55607	-2.30333	0	0.29777	1.05889	-0.685862
00000000_2.tif	control	IV984	d14	10.823	9.224	5.8594	3.3333	-2.5261	0	0.29777	0.992557	-0.752197
00000000_2.tif	control	IV984	d14	11.276	6.62	5.8594	4.87885	-0.980547	0	0.29777	1.45278	-0.291977
00000000_2.tif	control	IV984	d14	12.208	5.849	5.8594	5.21084	-0.648566	0	0.29777	1.55163	-0.193123
00000000_2.tif	control	IV984	d14	11.958	6.531	5.8594	4.65377	-1.20563	0	0.29777	1.38575	-0.359001
00000000_2.tif	control	IV984	d14	12.026	6.63	5.8594	4.53632	-1.32309	0	0.29777	1.35078	-0.393975
00000000_2.tif	control	IV984	d14	12.068	6.49	5.8594	4.65087	-1.20853	0	0.29777	1.38489	-0.359865
00000000_2.tif	control	IV984	d14	12.188	6.682	5.8594	4.42872	-1.43068	0	0.29777	1.31874	-0.426014
00000000_2.tif	control	IV984	d14	14.969	6.453	5.8594	4.54299	-1.31641	0	0.29777	1.35277	-0.391986
00000000_2.tif	control	IV984	d14	15.036	6.401	5.8594	4.6114	-1.248	0	0.29777	1.37314	-0.371617
00000000_2.tif	control	IV984	d14	15.271	6.396	5.8594	4.68736	-1.17205	0	0.29777	1.39575	-0.349
00000000_2.tif	control	IV984	d14	15.464	6.51	5.8594	4.64759	-1.21181	0	0.29777	1.38391	-0.360841
00000000_2.tif	control	IV984	d14	15.469	6.839	5.8594	4.34561	-1.51379	0	0.29777	1.29399	-0.450763
00000000_2.tif	control	IV984	d14	15.516	7.052	5.8594	4.17069	-1.68872	0	0.29777	1.24191	-0.502849
00000000_2.tif	control	IV984	d14	15.354	7.109	5.8594	4.05214	-1.80726	0	0.29777	1.20661	-0.538148
00000000_2.tif	control	IV984	d14	14.224	7.469	5.8594	3.39298	-2.46642	0	0.29777	1.01033	-0.734426
00000000_2.tif	control	IV984	d14	14.12	7.646	5.8594	3.20402	-2.65538	0	0.29777	0.954061	-0.790693
00000000_2.tif	control	IV984	d14	14.312	7.995	5.8594	2.88918	-2.97022	0	0.29777	0.860312	-0.884442
00000000_2.tif	control	IV984	d14	12.318	7.792	5.8594	3.35464	-2.50476	0	0.29777	0.998912	-0.745842
00000000_2.tif	control	IV984	d14	12.578	7.938	5.8594	3.11673	-2.74267	0	0.29777	0.928068	-0.816686
00000000_2.tif	control	IV984	d14	11.625	9.396	5.8594	2.55832	-3.30108	0	0.29777	0.761792	-0.982962
00000000_2.tif	control	IV984	d14	13.734	8.464	5.8594	2.36403	-3.49538	0	0.29777	0.703936	-1.04082
00000000_2.tif	control	IV984	d14	13.589	8.641	5.8594	2.19256	-3.66684	0	0.29777	0.652878	-1.09188
00000000_2.tif	control	IV984	d14	14.286	8.771	5.8594	2.12695	-3.73245	0	0.29777	0.633343	-1.11141
00000000_2.tif	control	IV984	d14	13.25	9.521	5.8594	1.3976	-4.46181	0	0.29777	0.416162	-1.32859
00000000_2.tif	control	IV984	d14	13.396	9.557	5.8594	1.31804	-4.54136	0	0.29777	0.392474	-1.35228
00000000_2.tif	control	IV984	d14	13.099	9.729	5.8594	1.2748	-4.5846	0	0.29777	0.379597	-1.36516
00000000_2.tif	control	IV984	d14	13.932	9.734	5.8594	1.10987	-4.74953	0	0.29777	0.330485	-1.41427
00000000_2.tif	control	IV984	d14	14.677	9.656	5.8594	1.4974	-4.362	0	0.29777	0.445881	-1.29887
00000000_2.tif	control	IV984	d14	14.849	9.818	5.8594	1.4963	-4.3631	0	0.29777	0.445553	-1.2992
00000000_2.tif	control	IV984	d14	14.922	9.802	5.8594	1.56141	-4.29799	0	0.29777	0.464941	-1.27981
00000000_2.tif	control	IV984	d14	15.479	10.161	5.8594	1.85786	-4.00154	0	0.29777	0.553215	-1.19154
00000000_2.tif	control	IV984	d14	15.396	10.495	5.8594	1.68425	-4.17515	0	0.29777	0.501518	-1.24324
00000000_2.tif	control	IV984	d14	11.656	10.76	5.8594	2.09011	-3.7693	0	0.29777	0.622371	-1.12238
00000000_2.tif	control	IV984	d14	11.583	12.13	5.8594	2.52378	-3.33562	0	0.29777	0.751505	-0.993249
00000000_2.tif	control	IV984	d14	11.74	12.286	5.8594	2.47907	-3.38033	0	0.29777	0.738193	-1.00656
00000000_2.tif	control	IV984	d14	13.161	10.995	5.8594	0.607408	-5.25199	0	0.29777	0.180868	-1.56389
00000000_2.tif	control	IV984	d14	13.203	11.016	5.8594	0.573679	-5.28572	0	0.29777	0.170825	-1.57393
00000000_2.tif	control	IV984	d14	13.135	11.406	5.8594	0.840348	-5.01905	0	0.29777	0.25023	-1.49452
00000000_2.tif	control	IV984	d14	13.094	11.516	5.8594	0.947177	-4.91222	0	0.29777	0.282041	-1.46271
00000000_2.tif	control	IV984	d14	12.589	11.849	5.8594	1.54233	-4.31707	0	0.29777	0.459259	-1.28549
00000000_2.tif	control	IV984	d14	13.255	11.557	5.8594	0.878374	-4.98103	0	0.29777	0.261553	-1.4832
00000000_2.tif	control	IV984	d14	13.271	11.729	5.8594	1.01808	-4.84133	0	0.29777	0.303152	-1.4416
00000000_2.tif	control	IV984	d14	13.214	11.932	5.8594	1.22506	-4.63434	0	0.29777	0.364787	-1.37997
00000000_2.tif	control	IV984	d14	13.151	11.99	5.8594	1.30502	-4.55438	0	0.29777	0.388596	-1.35616
00000000_2.tif	control	IV984	d14	13.255	12.073	5.8594	1.33796	-4.52145	0	0.29777	0.398403	-1.34635
00000000_2.tif	control	IV984	d14	13.359	12.099	5.8594	1.32832	-4.53108	0	0.29777	0.395534	-1.34922
00000000_2.tif	control	IV984	d14	13.844	12.021	5.8594	1.1971	-4.6623	0	0.29777	0.356461	-1.38829
00000000_2.tif	control	IV984	d14	14.12	11.37	5.8594	0.659082	-5.20032	0	0.29777	0.196255	-1.5485
00000000_2.tif	control	IV984	d14	14.208	11.339	5.8594	0.689558	-5.16984	0	0.29777	0.20533	-1.53942
00000000_2.tif	control	IV984	d14	14.203	11.427	5.8594	0.754032	-5.10537	0	0.29777	0.224528	-1.52023
00000000_2.tif	control	IV984	d14	14.396	10.609	5.8594	0.686849	-5.17255	0	0.29777	0.204523	-1.54023
00000000_2.tif	control	IV984	d14	14.573	10.38	5.8594	0.941429	-4.91797	0	0.29777	0.280329	-1.46442
00000000_2.tif	control	IV984	d14	14.641	10.521	5.8594	0.947135	-4.91227	0	0.29777	0.282028	-1.46273
00000000_2.tif	control	IV984	d14	14.76	10.589	5.8594	1.04276	-4.81664	0	0.29777	0.310502	-1.43425
00000000_2.tif	control	IV984	d14	14.906	10.953	5.8594	1.16771	-4.69169	0	0.29777	0.347709	-1.39705
00000000_2.tif	control	IV984	d14	15.432	11.198	5.8594	1.7271	-4.1323	0	0.29777	0.514278	-1.23048
00000000_2.tif	control	IV984	d14	14.745	11.531	5.8594	1.22238	-4.63702	0	0.29777	0.363988	-1.38077
00000000_2.tif	control	IV984	d14	14.734	11.688	5.8594	1.31062	-4.54878	0	0.29777	0.390263	-1.35449
00000000_2.tif	control	IV984	d14	14.792	11.724	5.8594	1.37805	-4.48135	0	0.29777	0.410342	-1.33441
00000000_2.tif	control	IV984	d14	14.776	12.146	5.8594	1.67335	-4.18606	0	0.29777	0.498272	-1.24648
00000000_2.tif	control	IV984	d14	14.859	12.193	5.8594	1.76188	-4.09752	0	0.29777	0.524635	-1.22012
00000000_2.tif	control	IV984	d14	14.005	12.573	5.8594	1.76426	-4.09514	0	0.29777	0.525345	-1.21941
00000000_2.tif	control	IV984	d14	13.87	13.161	5.8594	2.33635	-3.52306	0	0.29777	0.695694	-1.04906
00000000_2.tif	control	IV984	d14	11.542	13.547	5.8594	3.49945	-2.35995	0	0.29777	1.04203	-0.702722
00000000_2.tif	control	IV984	d14	12.089	13.943	5.8594	3.52783	-2.33157	0	0.29777	1.05048	-0.694273
00000000_2.tif	control	IV984	d14	12.198	13.891	5.8594	3.4315	-2.4279	0	0.29777	1.0218	-0.722957
00000000_2.tif	control	IV984	d14	12.292	14.255	5.8594	3.7223	-2.1371	0	0.29777	1.10839	-0.636364
00000000_2.tif	control	IV984	d14	11.76	14.818	5.8594	4.45649	-1.40291	0	0.29777	1.32701	-0.417744
00000000_2.tif	control	IV984	d14	11.964	14.797	5.8594	4.35028	-1.50912	0	0.29777	1.29538	-0.449372
00000000_2.tif	control	IV984	d14	14.458	13.333	5.8594	2.60449	-3.25491	0	0.29777	0.77554	-0.969214
00000000_2.tif	control	IV984	d14	14.464	13.391	5.8594	2.66194	-3.19746	0	0.29777	0.792646	-0.952108
00000000_2.tif	control	IV984	d14	15.078	12.99	5.8594	2.53991	-3.31949	0	0.29777	0.756308	-0.988446
00000000_2.tif	control	IV984	d14	14.297	14.021	5.8594	3.24036	-2.61904	0	0.29777	0.964883	-0.779871
00000000_2.tif	control	IV984	d14	14.542	14.609	5.8594	3.86409	-1.99531	0	0.29777	1.15061	-0.594145
00000000_2.tif	control	IV984	d14	12.802	14.859	5.8594	4.13983	-1.71957	0	0.29777	1.23272	-0.512036
00000000_2.tif	control	IV984	d14	13.016	15.089	5.8594	4.32291	-1.53649	0	0.29777	1.28723	-0.457521
00000000_2.tif	control	IV984	d14	13.01	15.182	5.8594	4.4156	-1.4438	0	0.29777	1.31483	-0.42992
00000000_2.tif	control	IV984	d14	13.573	14.979	5.8594	4.15456	-1.70484	0	0.29777	1.2371	-0.50765
00000000_2.tif	control	IV984	d14	14.01	15.062	5.8594	4.24228	-1.61712	0	0.29777	1.26323	-0.481529
00000000_2.tif	control	IV984	d14	14.354	15.062	5.8594	4.27757	-1.58183	0	0.29777	1.27373	-0.471021
00000000_2.tif	control	IV984	d14	14.375	14.844	5.8594	4.06511	-1.79429	0	0.29777	1.21047	-0.534285
00000000_2.tif	control	IV984	d14	13.781	15.307	5.8594	4.47914	-1.38026	0	0.29777	1.33375	-0.410999
00000000_2.tif	control	IV984	d14	15.443	14.896	5.8594	4.40815	-1.45125	0	0.29777	1.31262	-0.432138
00000000_2.tif	control	IV984	d14	11.542	16.078	5.8594	5.69348	-0.165922	0	0.29777	1.69535	-0.0494066
00000000_2.tif	control	IV984	d14	11.953	16.229	5.8594	5.69052	-0.168877	0	0.29777	1.69447	-0.0502866
00000000_2.tif	control	IV984	d14	11.995	16.443	5.8594	5.88139	0.0219865	1	0.29777	1.7513	0.00654692
00000000_2.tif	control	IV984	d14	12.188	16.083	5.8594	5.48081	-0.378592	0	0.29777	1.63202	-0.112733
00000000_2.tif	control	IV984	d14	12.474	17.062	5.8594	6.36225	0.502846	1	0.29777	1.89449	0.149733
00000000_2.tif	control	IV984	d14	12.641	17.578	5.8594	6.83969	0.980285	1	0.29777	2.03665	0.2919
00000000_2.tif	control	IV984	d14	15.297	17.526	5.8594	6.87546	1.01606	1	0.29777	2.0473	0.302551
00000000_2.tif	control	IV984	d14	13.375	18.302	5.8594	7.48315	1.62375	1	0.29777	2.22826	0.483504
00000000_2.tif	control	IV984	d14	13.479	18.531	5.8594	7.70759	1.84819	1	0.29777	2.29509	0.550336
00000000_2.tif	control	IV984	d14	14.292	17.885	5.8594	7.07817	1.21877	1	0.29777	2.10767	0.362912
00000000_2.tif	control	IV984	d14	14.766	17.984	5.8594	7.22847	1.36907	1	0.29777	2.15242	0.407667
00000000_2.tif	control	IV984	d14	15.255	18.042	5.8594	7.37034	1.51094	1	0.29777	2.19467	0.449912
00000000_2.tif	control	IV984	d14	15.646	17.943	5.8594	7.36458	1.50518	1	0.29777	2.19295	0.448197
00000000_2.tif	control	IV984	d14	15.646	18.068	5.8594	7.48541	1.62601	1	0.29777	2.22893	0.484177
00000000_2.tif	control	IV984	d14	15.703	17.854	5.8594	7.29373	1.43432	1	0.29777	2.17185	0.427099
00000000_2.tif	control	IV984	d14	15.792	17.807	5.8594	7.27301	1.41361	1	0.29777	2.16568	0.42093
00000000_2.tif	control	IV984	d14	15.562	18.443	5.8594	7.82877	1.96937	1	0.29777	2.33117	0.58642
00000000_2.tif	control	IV984	d14	15.552	18.651	5.8594	8.02898	2.16958	1	0.29777	2.39079	0.646036
00000000_2.tif	control	IV984	d14	14.005	19.458	5.8594	8.63392	2.77451	1	0.29777	2.57092	0.826167
00000000_2.tif	control	IV984	d14	17.5	19.188	5.8594	9.16459	3.30518	1	0.29777	2.72894	0.984185
00000000_2.tif	control	IV984	d14	17.203	19.083	5.8594	8.95002	3.09061	1	0.29777	2.66505	0.920292
00000000_2.tif	control	IV984	d14	16.031	18.188	5.8594	7.70684	1.84744	1	0.29777	2.29487	0.550112
00000000_2.tif	control	IV984	d14	15.948	17.938	5.8594	7.44347	1.58407	1	0.29777	2.21644	0.471689
00000000_2.tif	control	IV984	d14	16.172	17.417	5.8594	7.02177	1.16237	1	0.29777	2.09087	0.346118
00000000_2.tif	control	IV984	d14	16.276	17.38	5.8594	7.02386	1.16446	1	0.29777	2.0915	0.346742
00000000_2.tif	control	IV984	d14	16.344	17.469	5.8594	7.13146	1.27206	1	0.29777	2.12353	0.37878
00000000_2.tif	control	IV984	d14	16.333	17.542	5.8594	7.19552	1.33612	1	0.29777	2.14261	0.397857
00000000_2.tif	control	IV984	d14	17.021	17.656	5.8594	7.57323	1.71383	1	0.29777	2.25508	0.510326
00000000_2.tif	control	IV984	d14	17.219	18.562	5.8594	8.47841	2.61901	1	0.29777	2.52462	0.779862
00000000_2.tif	control	IV984	d14	18.089	17.365	5.8594	7.84874	1.98934	1	0.29777	2.33712	0.592365
00000000_2.tif	control	IV984	d14	17.995	17.109	5.8594	7.58376	1.72436	1	0.29777	2.25822	0.513463
00000000_2.tif	control	IV984	d14	18.151	17.161	5.8594	7.7149	1.8555	1	0.29777	2.29727	0.552513
00000000_2.tif	control	IV984	d14	18.224	17.005	5.8594	7.62999	1.77059	1	0.29777	2.27198	0.527229
00000000_2.tif	control	IV984	d14	18.359	16.724	5.8594	7.48678	1.62737	1	0.29777	2.22934	0.484583
00000000_2.tif	control	IV984	d14	16.807	16.927	5.8594	6.82449	0.965087	1	0.29777	2.03213	0.287374
00000000_2.tif	control	IV984	d14	16.953	16.594	5.8594	6.59833	0.738933	1	0.29777	1.96479	0.220032
00000000_2.tif	control	IV984	d14	16.693	16.115	5.8594	6.05335	0.193951	1	0.29777	1.80251	0.0577527
00000000_2.tif	control	IV984	d14	16.599	15.938	5.8594	5.85298	-0.00641799	0	0.29777	1.74284	-0.00191109
00000000_2.tif	control	IV984	d14	16.875	15.99	5.8594	6.03682	0.177414	1	0.29777	1.79758	0.0528286
00000000_2.tif	control	IV984	d14	15.859	14.292	5.8594	4.05811	-1.80129	0	0.29777	1.20838	-0.536369
00000000_2.tif	control	IV984	d14	17.5	14.964	5.8594	5.58628	-0.273122	0	0.29777	1.66343	-0.0813275
00000000_2.tif	control	IV984	d14	17.411	14.536	5.8594	5.21429	-0.645112	0	0.29777	1.55266	-0.192095
00000000_2.tif	control	IV984	d14	17.464	14.427	5.8594	5.1753	-0.684098	0	0.29777	1.54105	-0.203704
00000000_2.tif	control	IV984	d14	17.406	14.307	5.8594	5.05038	-0.809019	0	0.29777	1.50385	-0.240902
00000000_2.tif	control	IV984	d14	17.318	13.745	5.8594	4.61251	-1.24689	0	0.29777	1.37347	-0.371288
00000000_2.tif	control	IV984	d14	17.604	13.818	5.8594	4.8818	-0.977601	0	0.29777	1.45365	-0.2911
00000000_2.tif	control	IV984	d14	18.224	14.172	5.8594	5.58961	-0.269788	0	0.29777	1.66442	-0.0803348
00000000_2.tif	control	IV984	d14	18.323	14.349	5.8594	5.77542	-0.0839773	0	0.29777	1.71975	-0.0250059
00000000_2.tif	control	IV984	d14	18.677	14.307	5.8594	6.03557	0.176165	1	0.29777	1.79721	0.0524567
00000000_2.tif	control	IV984	d14	18.661	14.38	5.8594	6.06496	0.20556	1	0.29777	1.80596	0.0612096
00000000_2.tif	control	IV984	d14	18.672	13.859	5.8594	5.78466	-0.0747416	0	0.29777	1.7225	-0.0222558
00000000_2.tif	control	IV984	d14	18.667	13.396	5.8594	5.55164	-0.307761	0	0.29777	1.65311	-0.0916421
00000000_2.tif	control	IV984	d14	18.401	12.594	5.8594	4.97967	-0.879734	0	0.29777	1.4828	-0.261958
00000000_2.tif	control	IV984	d14	18.839	12.526	5.8594	5.36955	-0.489854	0	0.29777	1.59889	-0.145864
00000000_2.tif	control	IV984	d14	18.302	12.245	5.8594	4.77223	-1.08718	0	0.29777	1.42103	-0.323728
00000000_2.tif	control	IV984	d14	18.427	12.229	5.8594	4.88712	-0.972283	0	0.29777	1.45524	-0.289517
00000000_2.tif	control	IV984	d14	17.901	11.854	5.8594	4.28077	-1.57863	0	0.29777	1.27469	-0.470068
00000000_2.tif	control	IV984	d14	19.047	12.062	5.8594	5.44371	-0.415693	0	0.29777	1.62097	-0.123781
00000000_2.tif	control	IV984	d14	19.12	12.12	5.8594	5.5281	-0.331302	0	0.29777	1.6461	-0.0986517
00000000_2.tif	control	IV984	d14	19.583	12.062	5.8594	5.96699	0.107591	1	0.29777	1.77679	0.0320374
00000000_2.tif	control	IV984	d14	18.833	10.885	5.8594	5.08832	-0.771082	0	0.29777	1.51515	-0.229605
00000000_2.tif	control	IV984	d14	17.615	10.677	5.8594	3.87294	-1.98646	0	0.29777	1.15325	-0.591507
00000000_2.tif	control	IV984	d14	17.109	10.781	5.8594	3.36433	-2.49507	0	0.29777	1.0018	-0.742958
00000000_2.tif	control	IV984	d14	16.99	10.724	5.8594	3.24667	-2.61274	0	0.29777	0.96676	-0.777994
00000000_2.tif	control	IV984	d14	16.271	9.641	5.8594	2.79099	-3.06841	0	0.29777	0.831074	-0.91368
00000000_2.tif	control	IV984	d14	17.161	8.922	5.8594	3.91176	-1.94764	0	0.29777	1.16481	-0.579948
00000000_2.tif	control	IV984	d14	18.052	8.339	5.8594	4.97447	-0.88493	0	0.29777	1.48125	-0.263506
00000000_2.tif	control	IV984	d14	18.604	9.167	5.8594	5.13506	-0.724345	0	0.29777	1.52907	-0.215688
00000000_2.tif	control	IV984	d14	18.672	9.375	5.8594	5.13678	-0.722619	0	0.29777	1.52958	-0.215174
00000000_2.tif	control	IV984	d14	16.328	7.104	5.8594	4.53211	-1.32729	0	0.29777	1.34953	-0.395226
00000000_2.tif	control	IV984	d14	17.307	7.005	5.8594	5.22524	-0.634158	0	0.29777	1.55592	-0.188833
00000000_2.tif	control	IV984	d14	19.948	6.505	5.8594	7.56079	1.70139	1	0.29777	2.25138	0.506622
00000000_2.tif	control	IV984	d14	20.005	6.401	5.8594	7.6672	1.8078	1	0.29777	2.28306	0.538308
00000000_2.tif	control	IV984	d14	20.099	6.203	5.8594	7.859	1.9996	1	0.29777	2.34018	0.595422
00000000_2.tif	control	IV984	d14	20.943	12.344	5.8594	7.35591	1.49651	1	0.29777	2.19037	0.445616
00000000_2.tif	control	IV984	d14	21.104	12.495	5.8594	7.54545	1.68605	1	0.29777	2.24681	0.502054
00000000_2.tif	control	IV984	d14	21.115	15.63	5.8594	8.79637	2.93697	1	0.29777	2.61929	0.874541
00000000_2.tif	control	IV984	d14	21.214	15.75	5.8594	8.94495	3.08554	1	0.29777	2.66354	0.918782
00000002_3.tif	predator	IV984	d14	4.964	11.443	6.17717	10.958	4.78087	1	0.29777	3.26298	1.4236
00000002_3.tif	predator	IV984	d14	7.104	11	6.17717	8.87324	2.69608	1	0.29777	2.64219	0.802811
00000002_3.tif	predator	IV984	d14	6.63	10.286	6.17717	9.46121	3.28404	1	0.29777	2.81726	0.977889
00000002_3.tif	predator	IV984	d14	6.62	10.089	6.17717	9.51273	3.33556	1	0.29777	2.83261	0.993231
00000002_3.tif	predator	IV984	d14	9.115	10.573	6.17717	6.97299	0.795822	1	0.29777	2.07635	0.236972
00000002_3.tif	predator	IV984	d14	7.62	7.234	6.17717	9.65057	3.4734	1	0.29777	2.87365	1.03427
00000002_3.tif	predator	IV984	d14	7.693	7.198	6.17717	9.60673	3.42956	1	0.29777	2.8606	1.02122
00000002_3.tif	predator	IV984	d14	9.089	5.068	6.17717	9.85759	3.68043	1	0.29777	2.9353	1.09592
00000002_3.tif	predator	IV984	d14	8.849	4.547	6.17717	10.4018	4.22466	1	0.29777	3.09735	1.25798
00000002_3.tif	predator	IV984	d14	8.859	4.453	6.17717	10.4644	4.28727	1	0.29777	3.11599	1.27662
00000002_3.tif	predator	IV984	d14	9.49	4.115	6.17717	10.3137	4.1365	1	0.29777	3.0711	1.23173
00000002_3.tif	predator	IV984	d14	5.458	14.875	6.17717	10.7758	4.59865	1	0.29777	3.20871	1.36934
00000002_3.tif	predator	IV984	d14	9.766	10.656	6.17717	6.32097	0.143803	1	0.29777	1.8822	0.0428201
00000002_3.tif	predator	IV984	d14	9.958	10.578	6.17717	6.15502	-0.0221497	0	0.29777	1.83278	-0.0065955
00000002_3.tif	predator	IV984	d14	10.932	7.318	6.17717	6.96101	0.783845	1	0.29777	2.07278	0.233406
00000002_3.tif	predator	IV984	d14	11.031	7.25	6.17717	6.93909	0.76192	1	0.29777	2.06625	0.226877
00000002_3.tif	predator	IV984	d14	11.99	7.245	6.17717	6.30786	0.130688	1	0.29777	1.87829	0.0389151
00000002_3.tif	predator	IV984	d14	9.625	6.094	6.17717	8.75124	2.57408	1	0.29777	2.60586	0.766483
00000002_3.tif	predator	IV984	d14	12.823	5.75	6.17717	7.14283	0.965663	1	0.29777	2.12692	0.287546
00000002_3.tif	predator	IV984	d14	12.667	5.547	6.17717	7.39339	1.21622	1	0.29777	2.20153	0.362155
00000002_3.tif	predator	IV984	d14	14.812	6.104	6.17717	6.18966	0.0124926	1	0.29777	1.8431	0.00371994
00000002_3.tif	predator	IV984	d14	14.75	5.948	6.17717	6.3542	0.177029	1	0.29777	1.89209	0.052714
00000002_3.tif	predator	IV984	d14	10.865	4.479	6.17717	9.21379	3.03662	1	0.29777	2.74359	0.904215
00000002_3.tif	predator	IV984	d14	9.891	4.38	6.17717	9.85805	3.68088	1	0.29777	2.93543	1.09606
00000002_3.tif	predator	IV984	d14	9.979	4.219	6.17717	9.93355	3.75638	1	0.29777	2.95791	1.11854
00000002_3.tif	predator	IV984	d14	10.484	4.271	6.17717	9.59828	3.42112	1	0.29777	2.85808	1.01871
00000002_3.tif	predator	IV984	d14	11.047	3.625	6.17717	9.84932	3.67215	1	0.29777	2.93283	1.09346
00000002_3.tif	predator	IV984	d14	9.792	3.115	6.17717	10.9435	4.76631	1	0.29777	3.25864	1.41926
00000002_3.tif	predator	IV984	d14	9.714	2.818	6.17717	11.2339	5.05678	1	0.29777	3.34513	1.50576
00000002_3.tif	predator	IV984	d14	18.042	2.411	6.17717	10.0195	3.84235	1	0.29777	2.98351	1.14414
00000002_3.tif	predator	IV984	d14	18.104	2.438	6.17717	10.0066	3.82947	1	0.29777	2.97968	1.1403
00000002_3.tif	predator	IV984	d14	18.062	3.5	6.17717	8.96364	2.78647	1	0.29777	2.6691	0.829727
00000002_3.tif	predator	IV984	d14	16.932	4.677	6.17717	7.59202	1.41485	1	0.29777	2.26068	0.4213
00000002_3.tif	predator	IV984	d14	19.776	4.328	6.17717	8.77447	2.5973	1	0.29777	2.61277	0.773398
00000002_3.tif	predator	IV984	d14	20.094	3.797	6.17717	9.39149	3.21432	1	0.29777	2.7965	0.957128
00000002_3.tif	predator	IV984	d14	19.708	2.807	6.17717	10.1352	3.95803	1	0.29777	3.01796	1.17858
00000002_3.tif	predator	IV984	d14	19.75	2.771	6.17717	10.1844	4.00721	1	0.29777	3.0326	1.19323
00000002_3.tif	predator	IV984	d14	20.328	2.693	6.17717	10.4875	4.31033	1	0.29777	3.12286	1.28349
00000002_3.tif	predator	IV984	d14	20.37	2.562	6.17717	10.624	4.44682	1	0.29777	3.16351	1.32413
00000002_3.tif	predator	IV984	d14	21.115	18.823	6.17717	8.43378	2.25661	1	0.29777	2.51133	0.67195
00000002_3.tif	predator	IV984	d14	21.865	19.12	6.17717	9.14019	2.96302	1	0.29777	2.72167	0.882299
00000002_3.tif	predator	IV984	d14	21.932	18.969	6.17717	9.07082	2.89365	1	0.29777	2.70102	0.861642
00000002_3.tif	predator	IV984	d14	22.906	17.839	6.17717	8.99783	2.82066	1	0.29777	2.67928	0.839909
00000002_3.tif	predator	IV984	d14	22.333	16.557	6.17717	7.77405	1.59688	1	0.29777	2.31488	0.475504
00000002_3.tif	predator	IV984	d14	24.141	15.177	6.17717	8.76667	2.5895	1	0.29777	2.61045	0.771076
00000002_3.tif	predator	IV984	d14	24.036	15.089	6.17717	8.63814	2.46097	1	0.29777	2.57218	0.732804
00000002_3.tif	predator	IV984	d14	24.839	12.922	6.17717	8.97226	2.79509	1	0.29777	2.67167	0.832294
00000002_3.tif	predator	IV984	d14	24.188	9.917	6.17717	8.60001	2.42285	1	0.29777	2.56083	0.721451
00000002_3.tif	predator	IV984	d14	24.359	9.849	6.17717	8.78295	2.60578	1	0.29777	2.6153	0.775923
00000002_3.tif	predator	IV984	d14	22.688	8.776	6.17717	7.60535	1.42818	1	0.29777	2.26465	0.42527
00000002_3.tif	predator	IV984	d14	23.089	8.224	6.17717	8.21778	2.04061	1	0.29777	2.44701	0.607634
00000002_3.tif	predator	IV984	d14	24.208	7.823	6.17717	9.39308	3.21591	1	0.29777	2.79698	0.957603
00000002_3.tif	predator	IV984	d14	23.271	6.974	6.17717	9.03774	2.86058	1	0.29777	2.69117	0.851794
00000002_3.tif	predator	IV984	d14	23.448	6.833	6.17717	9.26369	3.08652	1	0.29777	2.75845	0.919073
00000002_3.tif	predator	IV984	d14	22.938	6.536	6.17717	9.03593	2.85876	1	0.29777	2.69063	0.851253
00000002_3.tif	predator	IV984	d14	24.026	6.474	6.17717	9.94289	3.76572	1	0.29777	2.96069	1.12132
00000002_3.tif	predator	IV984	d14	23.896	6.396	6.17717	9.88247	3.7053	1	0.29777	2.9427	1.10333
00000002_3.tif	predator	IV984	d14	21.635	4.271	6.17717	9.78639	3.60922	1	0.29777	2.91409	1.07472
00000002_3.tif	predator	IV984	d14	21.875	4.219	6.17717	9.9706	3.79343	1	0.29777	2.96895	1.12957
00000002_3.tif	predator	IV984	d14	21.938	4.349	6.17717	9.90518	3.72801	1	0.29777	2.94947	1.11009
00000002_3.tif	predator	IV984	d14	23.755	5.557	6.17717	10.2892	4.11199	1	0.29777	3.0638	1.22443
00000002_3.tif	predator	IV984	d14	23.875	5.266	6.17717	10.5696	4.39246	1	0.29777	3.14732	1.30794
00000002_3.tif	predator	IV984	d14	25.3	10.286	6.17717	9.5964	3.41924	1	0.29777	2.85752	1.01815
00000002_3.tif	predator	IV984	d14	26.21	10.418	6.17717	10.4665	4.2893	1	0.29777	3.1166	1.27723
0000002_17.tif	control	LX706	d12	7.682	10.156	5.90125	7.04314	1.14189	1	0.29777	2.09724	0.340022
0000002_17.tif	control	LX706	d12	7.776	10.062	5.90125	6.95762	1.05637	1	0.29777	2.07177	0.314556
0000002_17.tif	control	LX706	d12	6.875	11.115	5.90125	7.83826	1.93702	1	0.29777	2.334	0.576786
0000002_17.tif	control	LX706	d12	7.87	11.901	5.90125	6.93533	1.03409	1	0.29777	2.06513	0.307921
0000002_17.tif	control	LX706	d12	7.865	12.62	5.90125	7.09867	1.19742	1	0.29777	2.11377	0.356556
0000002_17.tif	control	LX706	d12	8.365	12.661	5.90125	6.63031	0.729068	1	0.29777	1.97431	0.217095
0000002_17.tif	control	LX706	d12	13.062	18.526	5.90125	7.98249	2.08125	1	0.29777	2.37695	0.619734
0000002_17.tif	control	LX706	d12	12.021	18.099	5.90125	7.85693	1.95568	1	0.29777	2.33956	0.582344
0000002_17.tif	control	LX706	d12	11.396	17.479	5.90125	7.53004	1.62879	1	0.29777	2.24222	0.485006
0000002_17.tif	control	LX706	d12	11.51	16.745	5.90125	6.82409	0.922845	1	0.29777	2.03201	0.274796
0000002_17.tif	control	LX706	d12	11.812	15.333	5.90125	5.44913	-0.452113	0	0.29777	1.62259	-0.134626
0000002_17.tif	control	LX706	d12	12.125	15.234	5.90125	5.20351	-0.697738	0	0.29777	1.54945	-0.207765
0000002_17.tif	control	LX706	d12	12.62	15.219	5.90125	4.96326	-0.937989	0	0.29777	1.47791	-0.279305
0000002_17.tif	control	LX706	d12	12.604	15.51	5.90125	5.23521	-0.666036	0	0.29777	1.55889	-0.198325
0000002_17.tif	control	LX706	d12	12.719	15.536	5.90125	5.21421	-0.687039	0	0.29777	1.55263	-0.20458
0000002_17.tif	control	LX706	d12	13.349	16.089	5.90125	5.54292	-0.358327	0	0.29777	1.65051	-0.106699
0000002_17.tif	control	LX706	d12	13.854	16.286	5.90125	5.63631	-0.264936	0	0.29777	1.67832	-0.0788899
0000002_17.tif	control	LX706	d12	14.036	16.26	5.90125	5.58597	-0.31528	0	0.29777	1.66333	-0.0938809
0000002_17.tif	control	LX706	d12	11.656	14.901	5.90125	5.17834	-0.722908	0	0.29777	1.54195	-0.21526
0000002_17.tif	control	LX706	d12	11.615	14.76	5.90125	5.08978	-0.811465	0	0.29777	1.51558	-0.24163
0000002_17.tif	control	LX706	d12	11.812	13.823	5.90125	4.24544	-1.6558	0	0.29777	1.26416	-0.493049
0000002_17.tif	control	LX706	d12	10.318	13.589	5.90125	5.24346	-0.657787	0	0.29777	1.56134	-0.195869
0000002_17.tif	control	LX706	d12	8.698	13.76	5.90125	6.73336	0.832115	1	0.29777	2.00499	0.247779
0000002_17.tif	control	LX706	d12	8.88	13.682	5.90125	6.53577	0.63453	1	0.29777	1.94616	0.188944
0000002_17.tif	control	LX706	d12	8.505	12.63	5.90125	6.48739	0.586147	1	0.29777	1.93175	0.174537
0000002_17.tif	control	LX706	d12	10.094	12.375	5.90125	4.89916	-1.00208	0	0.29777	1.45882	-0.29839
0000002_17.tif	control	LX706	d12	14.365	13.135	5.90125	2.44448	-3.45676	0	0.29777	0.727893	-1.02932
0000002_17.tif	control	LX706	d12	14.438	13.078	5.90125	2.37881	-3.52244	0	0.29777	0.708337	-1.04888
0000002_17.tif	control	LX706	d12	14.573	12.318	5.90125	1.60926	-4.29199	0	0.29777	0.479189	-1.27802
0000002_17.tif	control	LX706	d12	13.911	12.104	5.90125	1.5998	-4.30144	0	0.29777	0.476373	-1.28084
0000002_17.tif	control	LX706	d12	13.807	11.786	5.90125	1.39714	-4.50411	0	0.29777	0.416026	-1.34119
0000002_17.tif	control	LX706	d12	13.734	11.708	5.90125	1.38816	-4.51308	0	0.29777	0.413353	-1.34386
0000002_17.tif	control	LX706	d12	14.245	11.693	5.90125	1.08084	-4.82041	0	0.29777	0.32184	-1.43537
0000002_17.tif	control	LX706	d12	11.391	11.458	5.90125	3.39454	-2.50671	0	0.29777	1.01079	-0.746423
0000002_17.tif	control	LX706	d12	11.083	11.526	5.90125	3.70995	-2.19129	0	0.29777	1.10471	-0.652501
0000002_17.tif	control	LX706	d12	13.359	10.453	5.90125	1.36911	-4.53214	0	0.29777	0.407679	-1.34953
0000002_17.tif	control	LX706	d12	13.479	10.443	5.90125	1.25364	-4.6476	0	0.29777	0.373297	-1.38392
0000002_17.tif	control	LX706	d12	13.828	10.365	5.90125	0.942033	-4.95921	0	0.29777	0.280509	-1.4767
0000002_17.tif	control	LX706	d12	12.911	10.047	5.90125	1.91211	-3.98914	0	0.29777	0.569368	-1.18785
0000002_17.tif	control	LX706	d12	13.177	9.797	5.90125	1.78033	-4.12092	0	0.29777	0.530128	-1.22709
0000002_17.tif	control	LX706	d12	12.62	9.443	5.90125	2.44015	-3.4611	0	0.29777	0.726603	-1.03061
0000002_17.tif	control	LX706	d12	12.474	9.01	5.90125	2.80572	-3.09553	0	0.29777	0.835459	-0.921755
0000002_17.tif	control	LX706	d12	13.359	9.406	5.90125	1.87542	-4.02583	0	0.29777	0.558444	-1.19877
0000002_17.tif	control	LX706	d12	13.271	9.224	5.90125	2.06657	-3.83467	0	0.29777	0.615363	-1.14185
0000002_17.tif	control	LX706	d12	14.849	9.604	5.90125	1.11956	-4.78168	0	0.29777	0.333372	-1.42384
0000002_17.tif	control	LX706	d12	10.01	7.927	5.90125	5.45817	-0.443075	0	0.29777	1.62528	-0.131935
0000002_17.tif	control	LX706	d12	9.953	7.891	5.90125	5.52556	-0.375684	0	0.29777	1.64535	-0.111867
0000002_17.tif	control	LX706	d12	9.979	7.698	5.90125	5.60468	-0.296566	0	0.29777	1.66891	-0.0883083
0000002_17.tif	control	LX706	d12	10.062	7.609	5.90125	5.5839	-0.317348	0	0.29777	1.66272	-0.0944967
0000002_17.tif	control	LX706	d12	10.312	7.37	5.90125	5.51935	-0.381896	0	0.29777	1.6435	-0.113717
0000002_17.tif	control	LX706	d12	10.349	7.13	5.90125	5.63936	-0.261886	0	0.29777	1.67923	-0.0779818
0000002_17.tif	control	LX706	d12	10.656	6.922	5.90125	5.54594	-0.355303	0	0.29777	1.65142	-0.105799
0000002_17.tif	control	LX706	d12	10.745	6.891	5.90125	5.50283	-0.398419	0	0.29777	1.63858	-0.118637
0000002_17.tif	control	LX706	d12	10.906	6.661	5.90125	5.55374	-0.347506	0	0.29777	1.65374	-0.103477
0000002_17.tif	control	LX706	d12	14.51	7.885	5.90125	2.83558	-3.06567	0	0.29777	0.844349	-0.912864
0000002_17.tif	control	LX706	d12	10.943	5.339	5.90125	6.55959	0.658345	1	0.29777	1.95325	0.196035
0000002_17.tif	control	LX706	d12	11.557	6.286	5.90125	5.4318	-0.469441	0	0.29777	1.61743	-0.139785
0000002_17.tif	control	LX706	d12	11.604	6.193	5.90125	5.48117	-0.420073	0	0.29777	1.63213	-0.125085
0000002_17.tif	control	LX706	d12	12.016	6.036	5.90125	5.39478	-0.506465	0	0.29777	1.6064	-0.15081
0000002_17.tif	control	LX706	d12	12.062	6.005	5.90125	5.39903	-0.502212	0	0.29777	1.60767	-0.149544
0000002_17.tif	control	LX706	d12	12.635	5.625	5.90125	5.49314	-0.408109	0	0.29777	1.63569	-0.121523
0000002_17.tif	control	LX706	d12	13.812	5.781	5.90125	5.01282	-0.888424	0	0.29777	1.49267	-0.264546
0000002_17.tif	control	LX706	d12	13.729	4.969	5.90125	5.82698	-0.0742646	0	0.29777	1.7351	-0.0221138
0000002_17.tif	control	LX706	d12	13.781	4.839	5.90125	5.94691	0.0456625	1	0.29777	1.77081	0.0135969
0000002_17.tif	control	LX706	d12	13.594	4.562	5.90125	6.25116	0.349914	1	0.29777	1.86141	0.104194
0000002_17.tif	control	LX706	d12	12.615	2.901	5.90125	8.08719	2.18595	1	0.29777	2.40812	0.65091
0000002_17.tif	control	LX706	d12	12.464	2.792	5.90125	8.23233	2.33108	1	0.29777	2.45134	0.694126
0000002_17.tif	control	LX706	d12	12.49	2	5.90125	8.99062	3.08937	1	0.29777	2.67714	0.919922
0000002_17.tif	control	LX706	d12	12.604	1.984	5.90125	8.97879	3.07755	1	0.29777	2.67361	0.916401
0000002_17.tif	control	LX706	d12	15.651	2.375	5.90125	8.39271	2.49147	1	0.29777	2.4991	0.741884
0000002_17.tif	control	LX706	d12	15.495	2.51	5.90125	8.24214	2.3409	1	0.29777	2.45426	0.697048
0000002_17.tif	control	LX706	d12	15.495	2.698	5.90125	8.05503	2.15379	1	0.29777	2.39855	0.641333
0000002_17.tif	control	LX706	d12	15.5	2.938	5.90125	7.81674	1.91549	1	0.29777	2.32759	0.570376
0000002_17.tif	control	LX706	d12	15.443	3.021	5.90125	7.72851	1.82726	1	0.29777	2.30132	0.544104
0000002_17.tif	control	LX706	d12	15.401	3.141	5.90125	7.6051	1.70385	1	0.29777	2.26457	0.507357
0000002_17.tif	control	LX706	d12	15.505	3.161	5.90125	7.59546	1.69421	1	0.29777	2.2617	0.504486
0000002_17.tif	control	LX706	d12	15.578	3.089	5.90125	7.67504	1.7738	1	0.29777	2.2854	0.528183
0000002_17.tif	control	LX706	d12	15.401	3.339	5.90125	7.40796	1.50671	1	0.29777	2.20587	0.448654
0000002_17.tif	control	LX706	d12	15.271	3.182	5.90125	7.55339	1.65214	1	0.29777	2.24917	0.491958
0000002_17.tif	control	LX706	d12	15.188	3.281	5.90125	7.44881	1.54756	1	0.29777	2.21803	0.460817
0000002_17.tif	control	LX706	d12	15.344	3.927	5.90125	6.8172	0.915957	1	0.29777	2.02996	0.272745
0000002_17.tif	control	LX706	d12	15.417	3.875	5.90125	6.87617	0.974925	1	0.29777	2.04752	0.290303
0000002_17.tif	control	LX706	d12	16.932	4.224	5.90125	6.86211	0.960864	1	0.29777	2.04333	0.286116
0000002_17.tif	control	LX706	d12	17.042	4.219	5.90125	6.90333	1.00208	1	0.29777	2.0556	0.29839
0000002_17.tif	control	LX706	d12	15.161	5.115	5.90125	5.6177	-0.283544	0	0.29777	1.67278	-0.0844309
0000002_17.tif	control	LX706	d12	15.156	5.24	5.90125	5.49271	-0.408533	0	0.29777	1.63556	-0.121649
0000002_17.tif	control	LX706	d12	15.031	5.932	5.90125	4.79324	-1.10801	0	0.29777	1.42728	-0.329932
0000002_17.tif	control	LX706	d12	15.635	4.88	5.90125	5.90798	0.00673092	1	0.29777	1.75922	0.00200427
0000002_17.tif	control	LX706	d12	15.698	5.193	5.90125	5.60994	-0.291302	0	0.29777	1.67047	-0.0867409
0000002_17.tif	control	LX706	d12	15.604	5.37	5.90125	5.41942	-0.481823	0	0.29777	1.61374	-0.143472
0000002_17.tif	control	LX706	d12	16.443	5.776	5.90125	5.23559	-0.665651	0	0.29777	1.559	-0.198211
0000002_17.tif	control	LX706	d12	16.193	6.13	5.90125	4.82008	-1.08117	0	0.29777	1.43527	-0.321939
0000002_17.tif	control	LX706	d12	16.323	6.094	5.90125	4.89579	-1.00545	0	0.29777	1.45782	-0.299393
0000002_17.tif	control	LX706	d12	16.401	6.062	5.90125	4.9522	-0.949043	0	0.29777	1.47462	-0.282596
0000002_17.tif	control	LX706	d12	16.333	6.219	5.90125	4.78141	-1.11983	0	0.29777	1.42376	-0.333452
0000002_17.tif	control	LX706	d12	16.307	6.453	5.90125	4.5529	-1.34834	0	0.29777	1.35572	-0.401495
0000002_17.tif	control	LX706	d12	16.109	6.651	5.90125	4.2994	-1.60185	0	0.29777	1.28023	-0.476983
0000002_17.tif	control	LX706	d12	16.479	6.552	5.90125	4.52509	-1.37616	0	0.29777	1.34744	-0.409778
0000002_17.tif	control	LX706	d12	16.526	6.672	5.90125	4.43408	-1.46716	0	0.29777	1.32034	-0.436877
0000002_17.tif	control	LX706	d12	17.135	6.151	5.90125	5.17065	-0.730598	0	0.29777	1.53966	-0.21755
0000002_17.tif	control	LX706	d12	17.328	6.099	5.90125	5.30932	-0.591928	0	0.29777	1.58096	-0.176258
0000002_17.tif	control	LX706	d12	17.573	5.958	5.90125	5.55486	-0.346388	0	0.29777	1.65407	-0.103144
0000002_17.tif	control	LX706	d12	17.714	6.052	5.90125	5.54981	-0.351437	0	0.29777	1.65257	-0.104648
0000002_17.tif	control	LX706	d12	17.682	6.172	5.90125	5.43178	-0.469468	0	0.29777	1.61742	-0.139793
0000002_17.tif	control	LX706	d12	18.495	5.156	5.90125	6.72835	0.8271	1	0.29777	2.0035	0.246286
0000002_17.tif	control	LX706	d12	18.536	5.495	5.90125	6.47533	0.574081	1	0.29777	1.92816	0.170944
0000002_17.tif	control	LX706	d12	18.792	5.818	5.90125	6.37893	0.477684	1	0.29777	1.89945	0.14224
0000002_17.tif	control	LX706	d12	18.328	6.578	5.90125	5.49974	-0.401507	0	0.29777	1.63766	-0.119557
0000002_17.tif	control	LX706	d12	18.495	6.714	5.90125	5.51174	-0.389506	0	0.29777	1.64123	-0.115983
0000002_17.tif	control	LX706	d12	16.417	7.344	5.90125	3.78083	-2.12041	0	0.29777	1.12582	-0.631395
0000002_17.tif	control	LX706	d12	17.661	7.109	5.90125	4.66324	-1.23801	0	0.29777	1.38857	-0.368641
0000002_17.tif	control	LX706	d12	18.036	7.089	5.90125	4.92438	-0.976865	0	0.29777	1.46633	-0.290881
0000002_17.tif	control	LX706	d12	18.234	6.896	5.90125	5.20049	-0.700756	0	0.29777	1.54855	-0.208664
0000002_17.tif	control	LX706	d12	18.104	7.281	5.90125	4.83242	-1.06882	0	0.29777	1.43895	-0.318264
0000002_17.tif	control	LX706	d12	15.464	8.427	5.90125	2.41029	-3.49096	0	0.29777	0.717712	-1.0395
0000002_17.tif	control	LX706	d12	15.51	8.349	5.90125	2.49889	-3.40235	0	0.29777	0.744096	-1.01312
0000002_17.tif	control	LX706	d12	16.411	8.182	5.90125	3.05422	-2.84702	0	0.29777	0.909456	-0.847757
0000002_17.tif	control	LX706	d12	16.781	8.26	5.90125	3.21562	-2.68563	0	0.29777	0.957515	-0.799699
0000002_17.tif	control	LX706	d12	17.188	7.938	5.90125	3.72578	-2.17547	0	0.29777	1.10942	-0.64779
0000002_17.tif	control	LX706	d12	17.188	7.771	5.90125	3.85181	-2.04943	0	0.29777	1.14695	-0.610259
0000002_17.tif	control	LX706	d12	17.24	7.708	5.90125	3.9335	-1.96775	0	0.29777	1.17128	-0.585936
0000002_17.tif	control	LX706	d12	16.062	9.245	5.90125	2.00121	-3.90003	0	0.29777	0.5959	-1.16131
0000002_17.tif	control	LX706	d12	16.698	9.198	5.90125	2.50565	-3.3956	0	0.29777	0.746107	-1.01111
0000002_17.tif	control	LX706	d12	17.12	9.536	5.90125	2.68879	-3.21246	0	0.29777	0.80064	-0.956574
0000002_17.tif	control	LX706	d12	16.995	9.464	5.90125	2.6107	-3.29054	0	0.29777	0.777389	-0.979825
0000002_17.tif	control	LX706	d12	18.885	9.25	5.90125	4.43085	-1.4704	0	0.29777	1.31937	-0.43784
0000002_17.tif	control	LX706	d12	17.365	11.49	5.90125	2.7728	-3.12845	0	0.29777	0.825657	-0.931557
0000002_17.tif	control	LX706	d12	17.354	11.703	5.90125	2.82947	-3.07177	0	0.29777	0.842532	-0.914681
0000002_17.tif	control	LX706	d12	18.87	11.151	5.90125	4.18985	-1.71139	0	0.29777	1.24761	-0.509602
0000002_17.tif	control	LX706	d12	14.854	11.854	5.90125	1.14996	-4.75129	0	0.29777	0.342423	-1.41479
0000002_17.tif	control	LX706	d12	14.99	11.693	5.90125	1.0202	-4.88104	0	0.29777	0.303785	-1.45343
0000002_17.tif	control	LX706	d12	15.193	12.375	5.90125	1.73177	-4.16948	0	0.29777	0.515669	-1.24155
0000002_17.tif	control	LX706	d12	19.12	13.021	5.90125	4.98319	-0.91806	0	0.29777	1.48384	-0.273371
0000002_17.tif	control	LX706	d12	15.458	14.911	5.90125	4.26437	-1.63688	0	0.29777	1.2698	-0.487413
0000002_17.tif	control	LX706	d12	16.589	14.729	5.90125	4.4359	-1.46534	0	0.29777	1.32088	-0.436335
0000002_17.tif	control	LX706	d12	16.812	14.932	5.90125	4.71587	-1.18538	0	0.29777	1.40424	-0.35297
0000002_17.tif	control	LX706	d12	16.901	14.818	5.90125	4.65554	-1.24571	0	0.29777	1.38628	-0.370935
0000002_17.tif	control	LX706	d12	17.026	14.922	5.90125	4.80662	-1.09463	0	0.29777	1.43127	-0.325947
0000002_17.tif	control	LX706	d12	17.214	14.844	5.90125	4.83343	-1.06782	0	0.29777	1.43925	-0.317964
0000002_17.tif	control	LX706	d12	17.458	14.547	5.90125	4.72037	-1.18087	0	0.29777	1.40559	-0.351628
0000002_17.tif	control	LX706	d12	17.63	14.333	5.90125	4.65451	-1.24673	0	0.29777	1.38597	-0.371239
0000002_17.tif	control	LX706	d12	17.724	14.031	5.90125	4.48653	-1.41472	0	0.29777	1.33595	-0.42126
0000002_17.tif	control	LX706	d12	17.906	14.391	5.90125	4.87643	-1.02482	0	0.29777	1.45205	-0.30516
0000002_17.tif	control	LX706	d12	17.948	14.286	5.90125	4.82589	-1.07536	0	0.29777	1.43701	-0.320209
0000002_17.tif	control	LX706	d12	17.865	14.891	5.90125	5.23885	-0.662393	0	0.29777	1.55997	-0.197241
0000002_17.tif	control	LX706	d12	17.922	15.089	5.90125	5.43163	-0.469617	0	0.29777	1.61738	-0.139838
0000002_17.tif	control	LX706	d12	18.021	15.135	5.90125	5.5276	-0.373645	0	0.29777	1.64595	-0.11126
0000002_17.tif	control	LX706	d12	15.479	16.74	5.90125	6.07576	0.174514	1	0.29777	1.80918	0.0519651
0000002_17.tif	control	LX706	d12	15.536	17.292	5.90125	6.63053	0.729288	1	0.29777	1.97437	0.21716
0000002_17.tif	control	LX706	d12	16.344	17.188	5.90125	6.67874	0.777494	1	0.29777	1.98873	0.231514
0000002_17.tif	control	LX706	d12	17.969	16.734	5.90125	6.84888	0.947635	1	0.29777	2.03939	0.282177
0000002_17.tif	control	LX706	d12	19.323	13.99	5.90125	5.66362	-0.237626	0	0.29777	1.68646	-0.070758
0000002_17.tif	control	LX706	d12	19.344	13.193	5.90125	5.26159	-0.639656	0	0.29777	1.56674	-0.19047
0000002_17.tif	control	LX706	d12	19.776	12.823	5.90125	5.49392	-0.40732	0	0.29777	1.63593	-0.121288
0000002_17.tif	control	LX706	d12	19.724	12.625	5.90125	5.37237	-0.528875	0	0.29777	1.59973	-0.157483
0000002_17.tif	control	LX706	d12	20.672	12.182	5.90125	6.14687	0.245623	1	0.29777	1.83035	0.0731391
0000002_17.tif	control	LX706	d12	22.255	12.641	5.90125	7.79397	1.89273	1	0.29777	2.32081	0.563598
0000002_17.tif	control	LX706	d12	20.151	10.87	5.90125	5.45023	-0.451012	0	0.29777	1.62292	-0.134298
0000002_17.tif	control	LX706	d12	19.406	10.833	5.90125	4.70451	-1.19674	0	0.29777	1.40086	-0.356353
0000002_17.tif	control	LX706	d12	19.302	10.917	5.90125	4.60348	-1.29777	0	0.29777	1.37078	-0.386436
0000002_17.tif	control	LX706	d12	19.557	9.359	5.90125	5.03958	-0.861668	0	0.29777	1.50063	-0.256579
0000002_17.tif	control	LX706	d12	19.547	9.141	5.90125	5.093	-0.808243	0	0.29777	1.51654	-0.240671
0000002_17.tif	control	LX706	d12	20.865	8.13	5.90125	6.68186	0.780618	1	0.29777	1.98966	0.232445
0000002_17.tif	control	LX706	d12	19.833	8	5.90125	5.80368	-0.0975655	0	0.29777	1.72816	-0.0290521
0000003_22.tif	control	N2	wt	9.339	11.271	5.40118	6.78649	1.3853	1	0.29777	2.02081	0.412502
0000003_22.tif	control	N2	wt	10.427	12.5	5.40118	5.70688	0.305697	1	0.29777	1.69934	0.0910274
0000003_22.tif	control	N2	wt	10.479	12.615	5.40118	5.66916	0.267981	1	0.29777	1.68811	0.0797967
0000003_22.tif	control	N2	wt	12.929	16.227	5.40118	5.38817	-0.013016	0	0.29777	1.60443	-0.00387576
0000003_22.tif	control	N2	wt	13.023	16.259	5.40118	5.35958	-0.0416035	0	0.29777	1.59592	-0.0123883
0000003_22.tif	control	N2	wt	13.165	16.227	5.40118	5.25279	-0.148393	0	0.29777	1.56412	-0.0441871
0000003_22.tif	control	N2	wt	12.859	14.88	5.40118	4.42241	-0.978775	0	0.29777	1.31686	-0.29145
0000003_22.tif	control	N2	wt	13.158	14.859	5.40118	4.19328	-1.2079	0	0.29777	1.24863	-0.359677
0000003_22.tif	control	N2	wt	13.217	14.7	5.40118	4.03916	-1.36202	0	0.29777	1.20274	-0.405569
0000003_22.tif	control	N2	wt	12.818	14.484	5.40118	4.19499	-1.20619	0	0.29777	1.24914	-0.359168
0000003_22.tif	control	N2	wt	12.533	14.352	5.40118	4.34473	-1.05645	0	0.29777	1.29373	-0.31458
0000003_22.tif	control	N2	wt	13.241	14.356	5.40118	3.78792	-1.61326	0	0.29777	1.12793	-0.480381
0000003_22.tif	control	N2	wt	13.078	13.943	5.40118	3.66385	-1.73734	0	0.29777	1.09098	-0.517327
0000003_22.tif	control	N2	wt	12.55	13.72	5.40118	4.00224	-1.39895	0	0.29777	1.19175	-0.416564
0000003_22.tif	control	N2	wt	11.79	13.953	5.40118	4.78606	-0.615123	0	0.29777	1.42515	-0.183165
0000003_22.tif	control	N2	wt	11.63	13.686	5.40118	4.82388	-0.577304	0	0.29777	1.43641	-0.171904
0000003_22.tif	control	N2	wt	11.464	13.488	5.40118	4.90929	-0.491891	0	0.29777	1.46184	-0.14647
0000003_22.tif	control	N2	wt	11.377	13.592	5.40118	5.02619	-0.374995	0	0.29777	1.49665	-0.111662
0000003_22.tif	control	N2	wt	11.286	13.352	5.40118	5.036	-0.365184	0	0.29777	1.49957	-0.108741
0000003_22.tif	control	N2	wt	11.356	13.297	5.40118	4.95302	-0.448166	0	0.29777	1.47486	-0.133451
0000003_22.tif	control	N2	wt	11.561	13.418	5.40118	4.79476	-0.606421	0	0.29777	1.42774	-0.180574
0000003_22.tif	control	N2	wt	11.686	13.516	5.40118	4.70998	-0.691206	0	0.29777	1.40249	-0.20582
0000003_22.tif	control	N2	wt	11.557	13.137	5.40118	4.71541	-0.685778	0	0.29777	1.40411	-0.204204
0000003_22.tif	control	N2	wt	11.658	12.908	5.40118	4.56069	-0.84049	0	0.29777	1.35804	-0.250273
0000003_22.tif	control	N2	wt	12.411	13.061	5.40118	3.87554	-1.52564	0	0.29777	1.15402	-0.45429
0000003_22.tif	control	N2	wt	12.356	12.3	5.40118	3.76762	-1.63356	0	0.29777	1.12188	-0.486427
0000003_22.tif	control	N2	wt	12.075	11.769	5.40118	4.02527	-1.37592	0	0.29777	1.1986	-0.409707
0000003_22.tif	control	N2	wt	11.536	11.672	5.40118	4.56729	-0.83389	0	0.29777	1.36	-0.248307
0000003_22.tif	control	N2	wt	11.227	11.335	5.40118	4.90129	-0.499897	0	0.29777	1.45946	-0.148854
0000003_22.tif	control	N2	wt	12.023	11.352	5.40118	4.10878	-1.2924	0	0.29777	1.22347	-0.384838
0000003_22.tif	control	N2	wt	11.804	10.47	5.40118	4.51741	-0.88377	0	0.29777	1.34515	-0.26316
0000003_22.tif	control	N2	wt	12.036	10.554	5.40118	4.27081	-1.13037	0	0.29777	1.27172	-0.336591
0000003_22.tif	control	N2	wt	13.172	10.641	5.40118	3.17455	-2.22663	0	0.29777	0.945286	-0.663025
0000003_22.tif	control	N2	wt	11.307	8.964	5.40118	5.60429	0.20311	1	0.29777	1.66879	0.0604799
0000003_22.tif	control	N2	wt	11.905	8.797	5.40118	5.19932	-0.20186	0	0.29777	1.5482	-0.0601078
0000003_22.tif	control	N2	wt	12.064	8.793	5.40118	5.07436	-0.326821	0	0.29777	1.51099	-0.0973175
0000003_22.tif	control	N2	wt	15.783	5.373	5.40118	6.50468	1.1035	1	0.29777	1.9369	0.328588
0000003_22.tif	control	N2	wt	16.276	5.519	5.40118	6.35347	0.952283	1	0.29777	1.89187	0.283561
0000003_22.tif	control	N2	wt	15.373	7.467	5.40118	4.46245	-0.938731	0	0.29777	1.32878	-0.279526
0000003_22.tif	control	N2	wt	15.696	7.418	5.40118	4.4702	-0.930981	0	0.29777	1.33109	-0.277218
0000003_22.tif	control	N2	wt	15.783	7.526	5.40118	4.35548	-1.04571	0	0.29777	1.29693	-0.31138
0000003_22.tif	control	N2	wt	15.918	7.484	5.40118	4.38973	-1.01145	0	0.29777	1.30713	-0.30118
0000003_22.tif	control	N2	wt	15.974	7.45	5.40118	4.42177	-0.979416	0	0.29777	1.31667	-0.291641
0000003_22.tif	control	N2	wt	15.946	7.332	5.40118	4.54058	-0.860605	0	0.29777	1.35205	-0.256262
0000003_22.tif	control	N2	wt	16.175	7.502	5.40118	4.36866	-1.03252	0	0.29777	1.30086	-0.307454
0000003_22.tif	control	N2	wt	15.422	7.852	5.40118	4.07464	-1.32655	0	0.29777	1.2133	-0.395006
0000003_22.tif	control	N2	wt	14.516	8.405	5.40118	3.80948	-1.59171	0	0.29777	1.13435	-0.473962
0000003_22.tif	control	N2	wt	14.332	8.418	5.40118	3.87796	-1.52322	0	0.29777	1.15474	-0.45357
0000003_22.tif	control	N2	wt	15.613	8.297	5.40118	3.6059	-1.79528	0	0.29777	1.07373	-0.534581
0000003_22.tif	control	N2	wt	15.641	8.47	5.40118	3.43071	-1.97047	0	0.29777	1.02156	-0.586748
0000003_22.tif	control	N2	wt	15.741	8.453	5.40118	3.4357	-1.96548	0	0.29777	1.02305	-0.585261
0000003_22.tif	control	N2	wt	13.984	9.22	5.40118	3.39053	-2.01065	0	0.29777	1.0096	-0.598711
0000003_22.tif	control	N2	wt	14.175	9.762	5.40118	2.85402	-2.54716	0	0.29777	0.849842	-0.758468
0000003_22.tif	control	N2	wt	13.589	10.464	5.40118	2.87697	-2.52422	0	0.29777	0.856674	-0.751636
0000003_22.tif	control	N2	wt	14.502	9.519	5.40118	2.84211	-2.55907	0	0.29777	0.846296	-0.762014
0000003_22.tif	control	N2	wt	14.606	9.21	5.40118	3.05035	-2.35083	0	0.29777	0.908303	-0.700007
0000003_22.tif	control	N2	wt	14.825	9.179	5.40118	2.97734	-2.42384	0	0.29777	0.886563	-0.721748
0000003_22.tif	control	N2	wt	15.116	8.922	5.40118	3.10757	-2.29361	0	0.29777	0.925341	-0.682969
0000003_22.tif	control	N2	wt	15.165	9.03	5.40118	2.98964	-2.41154	0	0.29777	0.890226	-0.718085
0000003_22.tif	control	N2	wt	15.342	9.398	5.40118	2.58531	-2.81587	0	0.29777	0.769828	-0.838482
0000003_22.tif	control	N2	wt	15.668	9.707	5.40118	2.20552	-3.19566	0	0.29777	0.656738	-0.951572
0000003_22.tif	control	N2	wt	14.502	10.814	5.40118	1.91456	-3.48662	0	0.29777	0.570099	-1.03821
0000003_22.tif	control	N2	wt	14.623	10.88	5.40118	1.77727	-3.62392	0	0.29777	0.529217	-1.07909
0000003_22.tif	control	N2	wt	14.033	11.668	5.40118	2.07585	-3.32533	0	0.29777	0.618126	-0.990184
0000003_22.tif	control	N2	wt	14.241	11.957	5.40118	1.86004	-3.54115	0	0.29777	0.553863	-1.05445
0000003_22.tif	control	N2	wt	15.186	10.943	5.40118	1.30111	-4.10007	0	0.29777	0.387433	-1.22088
0000003_22.tif	control	N2	wt	15.422	10.832	5.40118	1.23926	-4.16192	0	0.29777	0.369015	-1.2393
0000003_22.tif	control	N2	wt	15.655	11.672	5.40118	0.486148	-4.91504	0	0.29777	0.14476	-1.46355
0000003_22.tif	control	N2	wt	16.293	11.648	5.40118	0.294822	-5.10636	0	0.29777	0.0877891	-1.52052
0000003_22.tif	control	N2	wt	16.45	11.88	5.40118	0.351142	-5.05004	0	0.29777	0.10456	-1.50375
0000003_22.tif	control	N2	wt	16.095	12.071	5.40118	0.20104	-5.20014	0	0.29777	0.0598636	-1.54845
0000003_22.tif	control	N2	wt	15.988	12.102	5.40118	0.257187	-5.144	0	0.29777	0.0765825	-1.53173
0000003_22.tif	control	N2	wt	15.873	12.161	5.40118	0.368452	-5.03273	0	0.29777	0.109714	-1.4986
0000003_22.tif	control	N2	wt	16.12	12.373	5.40118	0.503438	-4.89775	0	0.29777	0.149909	-1.4584
0000003_22.tif	control	N2	wt	16.21	12.498	5.40118	0.637734	-4.76345	0	0.29777	0.189898	-1.41841
0000003_22.tif	control	N2	wt	16.332	12.37	5.40118	0.551624	-4.84956	0	0.29777	0.164257	-1.44405
0000003_22.tif	control	N2	wt	15.859	12.856	5.40118	1.01479	-4.38639	0	0.29777	0.302174	-1.30614
0000003_22.tif	control	N2	wt	15.616	12.932	5.40118	1.16668	-4.23451	0	0.29777	0.347401	-1.26091
0000003_22.tif	control	N2	wt	15.3	13.3	5.40118	1.63808	-3.76311	0	0.29777	0.487771	-1.12054
0000003_22.tif	control	N2	wt	15.231	13.509	5.40118	1.85465	-3.54653	0	0.29777	0.552261	-1.05605
0000003_22.tif	control	N2	wt	16.12	12.943	5.40118	1.07321	-4.32798	0	0.29777	0.319568	-1.28874
0000003_22.tif	control	N2	wt	15.946	13.578	5.40118	1.71484	-3.68634	0	0.29777	0.510628	-1.09768
0000003_22.tif	control	N2	wt	16.082	13.773	5.40118	1.90308	-3.49811	0	0.29777	0.566679	-1.04163
0000003_22.tif	control	N2	wt	16.092	13.929	5.40118	2.05901	-3.34217	0	0.29777	0.613112	-0.995198
0000003_22.tif	control	N2	wt	14.936	14.311	5.40118	2.7039	-2.69729	0	0.29777	0.805139	-0.803171
0000003_22.tif	control	N2	wt	13.443	14.516	5.40118	3.74909	-1.6521	0	0.29777	1.11637	-0.491945
0000003_22.tif	control	N2	wt	13.762	14.894	5.40118	3.8218	-1.57938	0	0.29777	1.13802	-0.470293
0000003_22.tif	control	N2	wt	13.839	14.773	5.40118	3.679	-1.72219	0	0.29777	1.09549	-0.512816
0000003_22.tif	control	N2	wt	14.057	15.054	5.40118	3.78254	-1.61864	0	0.29777	1.12633	-0.481983
0000003_22.tif	control	N2	wt	14.168	15.03	5.40118	3.70329	-1.69789	0	0.29777	1.10273	-0.505582
0000003_22.tif	control	N2	wt	14.13	14.905	5.40118	3.61776	-1.78342	0	0.29777	1.07726	-0.53105
0000003_22.tif	control	N2	wt	14.477	14.516	5.40118	3.10358	-2.2976	0	0.29777	0.924153	-0.684158
0000003_22.tif	control	N2	wt	14.707	14.502	5.40118	2.97743	-2.42375	0	0.29777	0.886589	-0.721721
0000003_22.tif	control	N2	wt	15.085	14.519	5.40118	2.83644	-2.56474	0	0.29777	0.844607	-0.763703
0000003_22.tif	control	N2	wt	15.384	14.335	5.40118	2.5666	-2.83458	0	0.29777	0.764257	-0.844053
0000003_22.tif	control	N2	wt	15.589	14.689	5.40118	2.86476	-2.53642	0	0.29777	0.85304	-0.75527
0000003_22.tif	control	N2	wt	16.3	14.925	5.40118	3.06161	-2.33958	0	0.29777	0.911654	-0.696656
0000003_22.tif	control	N2	wt	16.464	14.984	5.40118	3.13532	-2.26587	0	0.29777	0.933604	-0.674707
0000003_22.tif	control	N2	wt	14.085	15.405	5.40118	4.06847	-1.33272	0	0.29777	1.21147	-0.396843
0000003_22.tif	control	N2	wt	13.568	15.762	5.40118	4.64259	-0.758595	0	0.29777	1.38242	-0.225887
0000003_22.tif	control	N2	wt	14.859	15.161	5.40118	3.51686	-1.88433	0	0.29777	1.04721	-0.561096
0000003_22.tif	control	N2	wt	14.818	15.543	5.40118	3.88997	-1.51121	0	0.29777	1.15832	-0.449993
0000003_22.tif	control	N2	wt	14.974	15.491	5.40118	3.79174	-1.60945	0	0.29777	1.12907	-0.479245
0000003_22.tif	control	N2	wt	14.918	15.977	5.40118	4.27343	-1.12775	0	0.29777	1.2725	-0.335811
0000003_22.tif	control	N2	wt	14.925	16.53	5.40118	4.80561	-0.595575	0	0.29777	1.43097	-0.177344
0000003_22.tif	control	N2	wt	15.023	16.995	5.40118	5.23674	-0.164448	0	0.29777	1.55934	-0.0489676
0000003_22.tif	control	N2	wt	15.359	15.974	5.40118	4.17018	-1.231	0	0.29777	1.24176	-0.366555
0000003_22.tif	control	N2	wt	15.724	15.519	5.40118	3.66822	-1.73297	0	0.29777	1.09229	-0.516025
0000003_22.tif	control	N2	wt	15.884	15.415	5.40118	3.55151	-1.84967	0	0.29777	1.05753	-0.550776
0000003_22.tif	control	N2	wt	15.981	15.502	5.40118	3.63392	-1.76727	0	0.29777	1.08207	-0.526239
0000003_22.tif	control	N2	wt	16.273	15.495	5.40118	3.62917	-1.77201	0	0.29777	1.08066	-0.527651
0000003_22.tif	control	N2	wt	16.467	15.585	5.40118	3.73318	-1.668	0	0.29777	1.11163	-0.496681
0000003_22.tif	control	N2	wt	16.373	16.349	5.40118	4.48737	-0.91381	0	0.29777	1.33621	-0.272105
0000003_22.tif	control	N2	wt	16.068	16.349	5.40118	4.47911	-0.922076	0	0.29777	1.33374	-0.274567
0000003_22.tif	control	N2	wt	15.991	15.95	5.40118	4.08143	-1.31975	0	0.29777	1.21533	-0.392983
0000003_22.tif	control	N2	wt	16.002	16.929	5.40118	5.05993	-0.341254	0	0.29777	1.5067	-0.101615
0000003_22.tif	control	N2	wt	14.755	17.425	5.40118	5.71527	0.314091	1	0.29777	1.70184	0.0935268
0000003_22.tif	control	N2	wt	14.793	17.519	5.40118	5.798	0.396819	1	0.29777	1.72647	0.118161
0000003_22.tif	control	N2	wt	14.634	18.179	5.40118	6.47686	1.07568	1	0.29777	1.92861	0.320304
0000003_22.tif	control	N2	wt	14.755	18.234	5.40118	6.50437	1.10319	1	0.29777	1.93681	0.328496
0000003_22.tif	control	N2	wt	14.467	18.54	5.40118	6.86675	1.46557	1	0.29777	2.04471	0.436403
0000003_22.tif	control	N2	wt	15.043	18.554	5.40118	6.7669	1.36572	1	0.29777	2.01498	0.406671
0000003_22.tif	control	N2	wt	18.036	19.241	5.40118	7.62126	2.22008	1	0.29777	2.26938	0.661072
0000003_22.tif	control	N2	wt	18.12	19.224	5.40118	7.62665	2.22546	1	0.29777	2.27099	0.662677
0000003_22.tif	control	N2	wt	16.543	17.231	5.40118	5.37935	-0.0218288	0	0.29777	1.60181	-0.00649995
0000003_22.tif	control	N2	wt	16.675	17.234	5.40118	5.39484	-0.00634593	0	0.29777	1.60642	-0.00188963
0000003_22.tif	control	N2	wt	16.658	17.106	5.40118	5.26576	-0.135428	0	0.29777	1.56798	-0.0403265
0000003_22.tif	control	N2	wt	16.755	16.328	5.40118	4.50601	-0.895176	0	0.29777	1.34175	-0.266557
0000003_22.tif	control	N2	wt	18.564	17.175	5.40118	5.84972	0.448539	1	0.29777	1.74187	0.133561
0000003_22.tif	control	N2	wt	18.436	17.113	5.40118	5.74026	0.339079	1	0.29777	1.70928	0.100968
0000003_22.tif	control	N2	wt	18.033	15.842	5.40118	4.41782	-0.983363	0	0.29777	1.31549	-0.292816
0000003_22.tif	control	N2	wt	18.269	15.72	5.40118	4.41943	-0.981749	0	0.29777	1.31597	-0.292335
0000003_22.tif	control	N2	wt	16.984	15.582	5.40118	3.81604	-1.58514	0	0.29777	1.1363	-0.472008
0000003_22.tif	control	N2	wt	16.953	15.477	5.40118	3.70672	-1.69446	0	0.29777	1.10375	-0.504561
0000003_22.tif	control	N2	wt	16.911	15.363	5.40118	3.58614	-1.81504	0	0.29777	1.06784	-0.540466
0000003_22.tif	control	N2	wt	16.575	14.981	5.40118	3.1472	-2.25398	0	0.29777	0.937143	-0.671167
0000003_22.tif	control	N2	wt	17.54	15.519	5.40118	3.92322	-1.47796	0	0.29777	1.16822	-0.440092
0000003_22.tif	control	N2	wt	17.37	15.332	5.40118	3.68794	-1.71325	0	0.29777	1.09816	-0.510153
0000003_22.tif	control	N2	wt	17.498	15.123	5.40118	3.54107	-1.86011	0	0.29777	1.05443	-0.553885
0000003_22.tif	control	N2	wt	19.148	15.655	5.40118	4.86031	-0.540872	0	0.29777	1.44725	-0.161056
0000003_22.tif	control	N2	wt	19.391	15.679	5.40118	5.03446	-0.366728	0	0.29777	1.49911	-0.109201
0000003_22.tif	control	N2	wt	16.661	14.102	5.40118	2.30167	-3.09952	0	0.29777	0.685367	-0.922943
0000003_22.tif	control	N2	wt	16.707	14.29	5.40118	2.49521	-2.90598	0	0.29777	0.742998	-0.865312
0000003_22.tif	control	N2	wt	17.109	14.453	5.40118	2.77344	-2.62774	0	0.29777	0.825848	-0.782462
0000003_22.tif	control	N2	wt	17.318	14.314	5.40118	2.73113	-2.67005	0	0.29777	0.81325	-0.79506
0000003_22.tif	control	N2	wt	17.783	14.415	5.40118	3.0517	-2.34948	0	0.29777	0.908705	-0.699605
0000003_22.tif	control	N2	wt	17.911	14.53	5.40118	3.21853	-2.18265	0	0.29777	0.958382	-0.649928
0000003_22.tif	control	N2	wt	18.967	14.623	5.40118	3.97548	-1.4257	0	0.29777	1.18378	-0.424532
0000003_22.tif	control	N2	wt	19.62	14.96	5.40118	4.68461	-0.716577	0	0.29777	1.39494	-0.213375
0000003_22.tif	control	N2	wt	19.613	14.731	5.40118	4.53139	-0.869791	0	0.29777	1.34931	-0.258998
0000003_22.tif	control	N2	wt	20.241	14.891	5.40118	5.12666	-0.274527	0	0.29777	1.52656	-0.0817459
0000003_22.tif	control	N2	wt	20.089	14.62	5.40118	4.84588	-0.555299	0	0.29777	1.44296	-0.165351
0000003_22.tif	control	N2	wt	20.071	14.415	5.40118	4.71739	-0.683789	0	0.29777	1.4047	-0.203612
0000003_22.tif	control	N2	wt	20.161	14.457	5.40118	4.81585	-0.585333	0	0.29777	1.43402	-0.174295
0000003_22.tif	control	N2	wt	20.193	14.394	5.40118	4.80951	-0.591671	0	0.29777	1.43213	-0.176182
0000003_22.tif	control	N2	wt	20.457	14.387	5.40118	5.03264	-0.368545	0	0.29777	1.49857	-0.109742
0000003_22.tif	control	N2	wt	20.54	14.207	5.40118	5.01837	-0.382812	0	0.29777	1.49432	-0.11399
0000003_22.tif	control	N2	wt	19.939	14.04	5.40118	4.41073	-0.990458	0	0.29777	1.31338	-0.294929
0000003_22.tif	control	N2	wt	19.776	13.839	5.40118	4.17101	-1.23018	0	0.29777	1.242	-0.36631
0000003_22.tif	control	N2	wt	19.536	13.88	5.40118	3.98159	-1.41959	0	0.29777	1.1856	-0.422712
0000003_22.tif	control	N2	wt	19.467	13.79	5.40118	3.87683	-1.52435	0	0.29777	1.1544	-0.453906
0000003_22.tif	control	N2	wt	19.554	13.689	5.40118	3.90459	-1.4966	0	0.29777	1.16267	-0.445642
0000003_22.tif	control	N2	wt	18.405	13.741	5.40118	2.96956	-2.43163	0	0.29777	0.884245	-0.724065
0000003_22.tif	control	N2	wt	18.53	13.773	5.40118	3.08726	-2.31392	0	0.29777	0.919293	-0.689017
0000003_22.tif	control	N2	wt	16.564	13.345	5.40118	1.54656	-3.85462	0	0.29777	0.460519	-1.14779
0000003_22.tif	control	N2	wt	16.55	13.13	5.40118	1.33828	-4.0629	0	0.29777	0.3985	-1.20981
0000003_22.tif	control	N2	wt	16.988	12.724	5.40118	1.23274	-4.16845	0	0.29777	0.367072	-1.24124
0000003_22.tif	control	N2	wt	17.693	12.932	5.40118	1.91538	-3.4858	0	0.29777	0.570343	-1.03797
0000003_22.tif	control	N2	wt	17.773	12.866	5.40118	1.94789	-3.45329	0	0.29777	0.580024	-1.02829
0000003_22.tif	control	N2	wt	17.839	13.043	5.40118	2.09846	-3.30272	0	0.29777	0.624858	-0.983452
0000003_22.tif	control	N2	wt	18.321	13.332	5.40118	2.65984	-2.74135	0	0.29777	0.792019	-0.816291
0000003_22.tif	control	N2	wt	18.554	13.359	5.40118	2.87126	-2.52992	0	0.29777	0.854976	-0.753335
0000003_22.tif	control	N2	wt	18.547	13.297	5.40118	2.83355	-2.56763	0	0.29777	0.843748	-0.764563
0000003_22.tif	control	N2	wt	18.887	13.203	5.40118	3.09028	-2.3109	0	0.29777	0.920193	-0.688118
0000003_22.tif	control	N2	wt	19.731	13.37	5.40118	3.92956	-1.47163	0	0.29777	1.1701	-0.438206
0000003_22.tif	control	N2	wt	19.88	13.345	5.40118	4.05852	-1.34266	0	0.29777	1.20851	-0.399805
0000003_22.tif	control	N2	wt	20.137	13.422	5.40118	4.32599	-1.0752	0	0.29777	1.28815	-0.320162
0000003_22.tif	control	N2	wt	20.391	13.682	5.40118	4.65882	-0.742363	0	0.29777	1.38726	-0.221053
0000003_22.tif	control	N2	wt	20.644	13.019	5.40118	4.68799	-0.713196	0	0.29777	1.39594	-0.212368
0000003_22.tif	control	N2	wt	20.415	13.151	5.40118	4.50209	-0.899093	0	0.29777	1.34059	-0.267723
0000003_22.tif	control	N2	wt	20.151	12.977	5.40118	4.20049	-1.20069	0	0.29777	1.25078	-0.357529
0000003_22.tif	control	N2	wt	19.981	12.932	5.40118	4.02465	-1.37654	0	0.29777	1.19842	-0.409892
0000003_22.tif	control	N2	wt	20.502	12.901	5.40118	4.5221	-0.879085	0	0.29777	1.34655	-0.261765
0000003_22.tif	control	N2	wt	19.345	12.752	5.40118	3.36369	-2.03749	0	0.29777	1.00161	-0.606703
0000003_22.tif	control	N2	wt	19.526	12.689	5.40118	3.52351	-1.87768	0	0.29777	1.04919	-0.559116
0000003_22.tif	control	N2	wt	19.946	12.45	5.40118	3.89048	-1.51071	0	0.29777	1.15847	-0.449843
0000003_22.tif	control	N2	wt	19.877	12.207	5.40118	3.793	-1.60818	0	0.29777	1.12944	-0.478869
0000003_22.tif	control	N2	wt	20.092	12.009	5.40118	3.99542	-1.40576	0	0.29777	1.18972	-0.418595
0000003_22.tif	control	N2	wt	20.547	11.911	5.40118	4.44819	-0.952995	0	0.29777	1.32454	-0.283773
0000003_22.tif	control	N2	wt	19.54	11.741	5.40118	3.44342	-1.95777	0	0.29777	1.02535	-0.582964
0000003_22.tif	control	N2	wt	17.717	11.189	5.40118	1.75547	-3.64571	0	0.29777	0.522727	-1.08558
0000003_22.tif	control	N2	wt	16.901	11.259	5.40118	1.00823	-4.39295	0	0.29777	0.30022	-1.30809
0000003_22.tif	control	N2	wt	17.891	10.946	5.40118	2.01619	-3.38499	0	0.29777	0.600362	-1.00795
0000003_22.tif	control	N2	wt	17.797	10.821	5.40118	1.9959	-3.40529	0	0.29777	0.594318	-1.01399
0000003_22.tif	control	N2	wt	18.071	10.995	5.40118	2.15741	-3.24378	0	0.29777	0.642411	-0.965899
0000003_22.tif	control	N2	wt	17.661	10.141	5.40118	2.33008	-3.0711	0	0.29777	0.693829	-0.914482
0000003_22.tif	control	N2	wt	17.679	10.057	5.40118	2.40486	-2.99632	0	0.29777	0.716096	-0.892214
0000003_22.tif	control	N2	wt	17.394	9.214	5.40118	2.95489	-2.4463	0	0.29777	0.879877	-0.728434
0000003_22.tif	control	N2	wt	16.97	8.745	5.40118	3.24411	-2.15707	0	0.29777	0.965999	-0.642311
0000003_22.tif	control	N2	wt	17.141	8.512	5.40118	3.51595	-1.88523	0	0.29777	1.04695	-0.561365
0000003_22.tif	control	N2	wt	17.224	8.22	5.40118	3.81944	-1.58174	0	0.29777	1.13731	-0.470996
0000003_22.tif	control	N2	wt	18.783	10.165	5.40118	3.17976	-2.22142	0	0.29777	0.946837	-0.661473
0000003_22.tif	control	N2	wt	18.804	9.95	5.40118	3.31714	-2.08404	0	0.29777	0.987745	-0.620565
0000003_22.tif	control	N2	wt	18.696	9.887	5.40118	3.26752	-2.13366	0	0.29777	0.97297	-0.63534
0000003_22.tif	control	N2	wt	18.446	9.405	5.40118	3.40362	-1.99756	0	0.29777	1.0135	-0.594814
0000003_22.tif	control	N2	wt	18.957	9.668	5.40118	3.6079	-1.79328	0	0.29777	1.07433	-0.533985
0000003_22.tif	control	N2	wt	19.682	9.873	5.40118	4.10194	-1.29925	0	0.29777	1.22143	-0.386876
0000003_22.tif	control	N2	wt	19.929	9.63	5.40118	4.43695	-0.964236	0	0.29777	1.32119	-0.287121
0000003_22.tif	control	N2	wt	20.085	9.998	5.40118	4.4037	-0.997483	0	0.29777	1.31129	-0.29702
0000003_22.tif	control	N2	wt	20.179	9.984	5.40118	4.49482	-0.906365	0	0.29777	1.33842	-0.269888
0000003_22.tif	control	N2	wt	18.606	8.536	5.40118	4.1714	-1.22978	0	0.29777	1.24212	-0.366192
0000003_22.tif	control	N2	wt	16.977	7.845	5.40118	4.11965	-1.28153	0	0.29777	1.22671	-0.381602
0000003_22.tif	control	N2	wt	17.033	7.762	5.40118	4.21284	-1.18834	0	0.29777	1.25446	-0.353853
0000003_22.tif	control	N2	wt	16.696	7.634	5.40118	4.27786	-1.12332	0	0.29777	1.27382	-0.334491
0000003_22.tif	control	N2	wt	19.741	7.373	5.40118	5.78681	0.385627	1	0.29777	1.72314	0.114828
0000003_22.tif	control	N2	wt	17.592	7.498	5.40118	4.6199	-0.781288	0	0.29777	1.37567	-0.232644
0000003_22.tif	control	N2	wt	20.88	10.648	5.40118	4.9347	-0.466485	0	0.29777	1.46941	-0.138905
0000003_22.tif	control	N2	wt	20.859	10.745	5.40118	4.89114	-0.510046	0	0.29777	1.45643	-0.151876
0000003_22.tif	control	N2	wt	20.807	10.835	5.40118	4.82042	-0.580759	0	0.29777	1.43538	-0.172933
0000003_22.tif	control	N2	wt	20.901	10.891	5.40118	4.90078	-0.500403	0	0.29777	1.45931	-0.149005
0000003_22.tif	control	N2	wt	21.467	14.446	5.40118	5.95409	0.552908	1	0.29777	1.77295	0.164639
0000003_22.tif	control	N2	wt	21.578	14.564	5.40118	6.1055	0.704312	1	0.29777	1.81803	0.209723
0000005_12.tif	predator	LX704	d23	6.115	9.552	6.44269	9.36867	2.92598	1	0.29777	2.78971	0.871268
0000005_12.tif	predator	LX704	d23	6.245	9.604	6.44269	9.22995	2.78726	1	0.29777	2.7484	0.829962
0000005_12.tif	predator	LX704	d23	7.62	7.807	6.44269	8.58314	2.14045	1	0.29777	2.5558	0.637363
0000005_12.tif	predator	LX704	d23	8.38	6.083	6.44269	8.91955	2.47686	1	0.29777	2.65597	0.737534
0000005_12.tif	predator	LX704	d23	8.307	10.266	6.44269	7.07069	0.628001	1	0.29777	2.10544	0.187
0000005_12.tif	predator	LX704	d23	8.031	13.453	6.44269	7.35379	0.911099	1	0.29777	2.18974	0.271298
0000005_12.tif	predator	LX704	d23	8.016	13.578	6.44269	7.39699	0.954301	1	0.29777	2.2026	0.284162
0000005_12.tif	predator	LX704	d23	6.203	14.651	6.44269	9.43236	2.98967	1	0.29777	2.80867	0.890233
0000005_12.tif	predator	LX704	d23	9.26	17.786	6.44269	8.41528	1.9726	1	0.29777	2.50582	0.58738
0000005_12.tif	predator	LX704	d23	9.302	17.693	6.44269	8.31986	1.87717	1	0.29777	2.4774	0.558964
0000005_12.tif	predator	LX704	d23	13.656	18.047	6.44269	6.40852	-0.0341661	0	0.29777	1.90827	-0.0101736
0000005_12.tif	predator	LX704	d23	13.469	18.047	6.44269	6.45622	0.013526	1	0.29777	1.92247	0.00402765
0000005_12.tif	predator	LX704	d23	12.703	17.63	6.44269	6.31769	-0.125	0	0.29777	1.88122	-0.0372211
0000005_12.tif	predator	LX704	d23	12.016	17.354	6.44269	6.37916	-0.0635323	0	0.29777	1.89952	-0.018918
0000005_12.tif	predator	LX704	d23	11.724	17.062	6.44269	6.28476	-0.15793	0	0.29777	1.87141	-0.0470269
0000005_12.tif	predator	LX704	d23	11.474	17.115	6.44269	6.46976	0.0270719	1	0.29777	1.9265	0.00806119
0000005_12.tif	predator	LX704	d23	11.26	16.885	6.44269	6.41253	-0.0301627	0	0.29777	1.90946	-0.00898154
0000005_12.tif	predator	LX704	d23	11.219	16.797	6.44269	6.36893	-0.0737634	0	0.29777	1.89648	-0.0219645
0000005_12.tif	predator	LX704	d23	10.693	16.589	6.44269	6.55799	0.1153	1	0.29777	1.95277	0.0343328
0000005_12.tif	predator	LX704	d23	10.974	16.094	6.44269	6.00693	-0.43576	0	0.29777	1.78868	-0.129756
0000005_12.tif	predator	LX704	d23	13.729	15.193	6.44269	3.67368	-2.76901	0	0.29777	1.09391	-0.824529
0000005_12.tif	predator	LX704	d23	13.693	14.849	6.44269	3.37736	-3.06533	0	0.29777	1.00568	-0.912764
0000005_12.tif	predator	LX704	d23	10.391	12.104	6.44269	4.81991	-1.62278	0	0.29777	1.43522	-0.483215
0000005_12.tif	predator	LX704	d23	9.849	9.089	6.44269	6.01394	-0.428752	0	0.29777	1.79077	-0.12767
0000005_12.tif	predator	LX704	d23	9.891	8.927	6.44269	6.05253	-0.390157	0	0.29777	1.80226	-0.116177
0000005_12.tif	predator	LX704	d23	13.01	8.042	6.44269	4.37528	-2.06741	0	0.29777	1.30283	-0.615613
0000005_12.tif	predator	LX704	d23	10.604	6.974	6.44269	6.68671	0.244023	1	0.29777	1.9911	0.0726626
0000005_12.tif	predator	LX704	d23	11.047	6.891	6.44269	6.45339	0.0107055	1	0.29777	1.92163	0.00318778
0000005_12.tif	predator	LX704	d23	8.562	6.047	6.44269	8.80471	2.36202	1	0.29777	2.62178	0.703338
0000005_12.tif	predator	LX704	d23	12.333	6.771	6.44269	5.81465	-0.62804	0	0.29777	1.73143	-0.187011
0000005_12.tif	predator	LX704	d23	12.948	6.859	6.44269	5.45674	-0.985952	0	0.29777	1.62485	-0.293587
0000005_12.tif	predator	LX704	d23	13.224	6.891	6.44269	5.31887	-1.12382	0	0.29777	1.5838	-0.334639
0000005_12.tif	predator	LX704	d23	13.339	5.547	6.44269	6.55175	0.109063	1	0.29777	1.95092	0.0324757
0000005_12.tif	predator	LX704	d23	12.724	2.391	6.44269	9.75717	3.31448	1	0.29777	2.90539	0.986954
0000005_12.tif	predator	LX704	d23	17.776	2.891	6.44269	9.30002	2.85733	1	0.29777	2.76927	0.850826
0000005_12.tif	predator	LX704	d23	16.333	3.938	6.44269	7.97051	1.52782	1	0.29777	2.37338	0.454939
0000005_12.tif	predator	LX704	d23	16.484	4	6.44269	7.93212	1.48943	1	0.29777	2.36195	0.443508
0000005_12.tif	predator	LX704	d23	16.984	4.677	6.44269	7.36945	0.926759	1	0.29777	2.1944	0.275961
0000005_12.tif	predator	LX704	d23	16.896	4.885	6.44269	7.14643	0.703743	1	0.29777	2.12799	0.209554
0000005_12.tif	predator	LX704	d23	15.359	5.568	6.44269	6.26194	-0.180746	0	0.29777	1.86462	-0.0538207
0000005_12.tif	predator	LX704	d23	16.391	5.797	6.44269	6.14689	-0.295795	0	0.29777	1.83036	-0.088079
0000005_12.tif	predator	LX704	d23	17.755	6.036	6.44269	6.32929	-0.113395	0	0.29777	1.88467	-0.0337656
0000005_12.tif	predator	LX704	d23	17.823	6.047	6.44269	6.347	-0.0956931	0	0.29777	1.88995	-0.0284945
0000005_12.tif	predator	LX704	d23	17.849	6.141	6.44269	6.27242	-0.170267	0	0.29777	1.86774	-0.0507003
0000005_12.tif	predator	LX704	d23	18.542	8.214	6.44269	4.92036	-1.52233	0	0.29777	1.46513	-0.453305
0000005_12.tif	predator	LX704	d23	18.531	8.464	6.44269	4.73203	-1.71066	0	0.29777	1.40906	-0.509384
0000005_12.tif	predator	LX704	d23	15.922	10.146	6.44269	1.82923	-4.61346	0	0.29777	0.54469	-1.37375
0000005_12.tif	predator	LX704	d23	18.016	10.318	6.44269	3.19266	-3.25003	0	0.29777	0.950678	-0.967762
0000005_12.tif	predator	LX704	d23	18.729	10.823	6.44269	3.66643	-2.77626	0	0.29777	1.09175	-0.826687
0000005_12.tif	predator	LX704	d23	18.714	10.906	6.44269	3.63004	-2.81265	0	0.29777	1.08092	-0.837522
0000005_12.tif	predator	LX704	d23	18.661	11.141	6.44269	3.52558	-2.91711	0	0.29777	1.04981	-0.868627
0000005_12.tif	predator	LX704	d23	13.953	13.807	6.44269	2.34071	-4.10198	0	0.29777	0.696994	-1.22145
0000005_12.tif	predator	LX704	d23	14.005	15.286	6.44269	3.65964	-2.78305	0	0.29777	1.08973	-0.828708
0000005_12.tif	predator	LX704	d23	17.516	15.161	6.44269	4.05695	-2.38574	0	0.29777	1.20804	-0.710401
0000005_12.tif	predator	LX704	d23	17.344	15.292	6.44269	4.07224	-2.37044	0	0.29777	1.21259	-0.705847
0000005_12.tif	predator	LX704	d23	16.786	15.411	6.44269	3.91711	-2.52558	0	0.29777	1.1664	-0.752041
0000005_12.tif	predator	LX704	d23	14.901	15.672	6.44269	3.85584	-2.58684	0	0.29777	1.14815	-0.770285
0000005_12.tif	predator	LX704	d23	14.547	16	6.44269	4.22326	-2.21943	0	0.29777	1.25756	-0.66088
0000005_12.tif	predator	LX704	d23	14.505	16.188	6.44269	4.41552	-2.02717	0	0.29777	1.31481	-0.603631
0000005_12.tif	predator	LX704	d23	14.521	16.328	6.44269	4.55139	-1.8913	0	0.29777	1.35527	-0.563173
0000005_12.tif	predator	LX704	d23	17.839	16.677	6.44269	5.51918	-0.923514	0	0.29777	1.64344	-0.274995
0000005_12.tif	predator	LX704	d23	18.234	16.667	6.44269	5.70989	-0.732796	0	0.29777	1.70023	-0.218205
0000005_12.tif	predator	LX704	d23	18.422	16.698	6.44269	5.83771	-0.604979	0	0.29777	1.73829	-0.180145
0000005_12.tif	predator	LX704	d23	18.557	16.479	6.44269	5.73421	-0.708483	0	0.29777	1.70747	-0.210965
0000005_12.tif	predator	LX704	d23	18.708	16.797	6.44269	6.08079	-0.361901	0	0.29777	1.81068	-0.107763
0000005_12.tif	predator	LX704	d23	18.849	17.052	6.44269	6.37052	-0.0721719	0	0.29777	1.89695	-0.0214906
0000005_12.tif	predator	LX704	d23	18.479	17.307	6.44269	6.3837	-0.05899	0	0.29777	1.90087	-0.0175655
0000005_12.tif	predator	LX704	d23	18.229	17.479	6.44269	6.41019	-0.0325039	0	0.29777	1.90876	-0.00967869
0000005_12.tif	predator	LX704	d23	14.01	20.344	6.44269	8.59916	2.15647	1	0.29777	2.56057	0.642131
0000005_12.tif	predator	LX704	d23	13.833	20.422	6.44269	8.70251	2.25982	1	0.29777	2.59135	0.672908
0000005_12.tif	predator	LX704	d23	20.87	14.068	6.44269	6.09364	-0.349046	0	0.29777	1.8145	-0.103935
0000005_12.tif	predator	LX704	d23	20.87	13.219	6.44269	5.83522	-0.607471	0	0.29777	1.73755	-0.180887
0000005_12.tif	predator	LX704	d23	20.922	13.255	6.44269	5.89434	-0.548345	0	0.29777	1.75516	-0.163281
0000005_12.tif	predator	LX704	d23	21.099	13.208	6.44269	6.05535	-0.387343	0	0.29777	1.8031	-0.115339
0000005_12.tif	predator	LX704	d23	19.833	12.385	6.44269	4.66338	-1.77931	0	0.29777	1.38862	-0.529824
0000005_12.tif	predator	LX704	d23	21.255	12.698	6.44269	6.11421	-0.328476	0	0.29777	1.82063	-0.0978103
0000005_12.tif	predator	LX704	d23	21.286	12.047	6.44269	6.08694	-0.355748	0	0.29777	1.81251	-0.105931
0000005_12.tif	predator	LX704	d23	21.203	11.859	6.44269	6.00008	-0.442609	0	0.29777	1.78664	-0.131796
0000005_12.tif	predator	LX704	d23	22.724	12.083	6.44269	7.52532	1.08263	1	0.29777	2.24082	0.322375
0000005_12.tif	predator	LX704	d23	22.87	11.901	6.44269	7.66735	1.22466	1	0.29777	2.28311	0.364666
0000005_12.tif	predator	LX704	d23	24.505	11.557	6.44269	9.30595	2.86326	1	0.29777	2.77103	0.852592
0000005_12.tif	predator	LX704	d23	24.516	13.234	6.44269	9.41854	2.97585	1	0.29777	2.80456	0.886118
0000005_12.tif	predator	LX704	d23	21.526	10.281	6.44269	6.5095	0.0668067	1	0.29777	1.93833	0.019893
0000005_12.tif	predator	LX704	d23	21.396	10.026	6.44269	6.44984	0.00715199	1	0.29777	1.92057	0.00212965
0000005_12.tif	predator	LX704	d23	21.891	6.573	6.44269	8.50555	2.06286	1	0.29777	2.5327	0.614258
0000005_12.tif	predator	LX704	d23	22.031	6.526	6.44269	8.64481	2.20212	1	0.29777	2.57417	0.655726
0000005_12.tif	predator	LX704	d23	23.411	5.583	6.44269	10.3136	3.87096	1	0.29777	3.07109	1.15265
0000005_12.tif	predator	LX704	d23	23.276	5.417	6.44269	10.3089	3.86625	1	0.29777	3.06969	1.15125
0000005_12.tif	predator	LX704	d23	24.752	11.418	6.44269	9.5578	3.11511	1	0.29777	2.84603	0.927586
0000007_16.tif	predator	LX705	d13	7.193	7.547	6.75528	10.4635	3.7082	1	0.29777	3.11571	1.10419
0000007_16.tif	predator	LX705	d13	7.297	7.677	6.75528	10.315	3.55973	1	0.29777	3.0715	1.05998
0000007_16.tif	predator	LX705	d13	8.354	8.599	6.75528	8.98193	2.22665	1	0.29777	2.67455	0.66303
0000007_16.tif	predator	LX705	d13	7.698	10.88	6.75528	9.06383	2.30854	1	0.29777	2.69894	0.687415
0000007_16.tif	predator	LX705	d13	7.214	10.901	6.75528	9.5426	2.78732	1	0.29777	2.8415	0.829979
0000007_16.tif	predator	LX705	d13	6.375	11.724	6.75528	10.3297	3.57441	1	0.29777	3.07587	1.06435
0000007_16.tif	predator	LX705	d13	6.339	11.844	6.75528	10.3642	3.60893	1	0.29777	3.08615	1.07463
0000007_16.tif	predator	LX705	d13	7.984	11.88	6.75528	8.71906	1.96377	1	0.29777	2.59627	0.584752
0000007_16.tif	predator	LX705	d13	7.677	12.536	6.75528	9.04761	2.29233	1	0.29777	2.69411	0.682587
0000007_16.tif	predator	LX705	d13	6.464	13.104	6.75528	10.3083	3.55298	1	0.29777	3.06949	1.05797
0000007_16.tif	predator	LX705	d13	6.479	13.339	6.75528	10.3232	3.56796	1	0.29777	3.07395	1.06243
0000007_16.tif	predator	LX705	d13	6.375	14.13	6.75528	10.5637	3.80841	1	0.29777	3.14555	1.13403
0000007_16.tif	predator	LX705	d13	7.104	13.708	6.75528	9.76576	3.01047	1	0.29777	2.90795	0.896429
0000007_16.tif	predator	LX705	d13	7.411	14.672	6.75528	9.69352	2.93824	1	0.29777	2.88644	0.874919
0000007_16.tif	predator	LX705	d13	8.474	16.719	6.75528	9.53065	2.77537	1	0.29777	2.83794	0.826421
0000007_16.tif	predator	LX705	d13	8.115	17.818	6.75528	10.4234	3.66807	1	0.29777	3.10376	1.09224
0000007_16.tif	predator	LX705	d13	9.729	18.568	6.75528	9.64118	2.88589	1	0.29777	2.87085	0.859333
0000007_16.tif	predator	LX705	d13	9.719	18.417	6.75528	9.54486	2.78957	1	0.29777	2.84217	0.830651
0000007_16.tif	predator	LX705	d13	12.734	19.719	6.75528	8.75887	2.00359	1	0.29777	2.60813	0.596608
0000007_16.tif	predator	LX705	d13	13.453	19.536	6.75528	8.28873	1.53345	1	0.29777	2.46814	0.456616
0000007_16.tif	predator	LX705	d13	14.229	20.833	6.75528	9.25866	2.50337	1	0.29777	2.75695	0.74543
0000007_16.tif	predator	LX705	d13	13.63	17.484	6.75528	6.36409	-0.391193	0	0.29777	1.89504	-0.116485
0000007_16.tif	predator	LX705	d13	13.193	17.464	6.75528	6.56932	-0.185968	0	0.29777	1.95615	-0.0553757
0000007_16.tif	predator	LX705	d13	12.938	16.88	6.75528	6.23428	-0.521009	0	0.29777	1.85638	-0.155141
0000007_16.tif	predator	LX705	d13	12.5	16.682	6.75528	6.35827	-0.39701	0	0.29777	1.8933	-0.118218
0000007_16.tif	predator	LX705	d13	12.505	15.932	6.75528	5.81306	-0.942226	0	0.29777	1.73095	-0.280567
0000007_16.tif	predator	LX705	d13	12.625	15.573	6.75528	5.48091	-1.27438	0	0.29777	1.63205	-0.379472
0000007_16.tif	predator	LX705	d13	10.828	13.661	6.75528	6.1301	-0.625184	0	0.29777	1.82536	-0.186161
0000007_16.tif	predator	LX705	d13	8.693	14.141	6.75528	8.31463	1.55934	1	0.29777	2.47585	0.464325
0000007_16.tif	predator	LX705	d13	8.62	13.396	6.75528	8.21828	1.463	1	0.29777	2.44716	0.435636
0000007_16.tif	predator	LX705	d13	12.432	13.198	6.75528	4.4607	-2.29459	0	0.29777	1.32826	-0.683259
0000007_16.tif	predator	LX705	d13	12.844	13.068	6.75528	4.02871	-2.72657	0	0.29777	1.19963	-0.811891
0000007_16.tif	predator	LX705	d13	12.859	12.755	6.75528	3.93557	-2.81972	0	0.29777	1.17189	-0.839628
0000007_16.tif	predator	LX705	d13	9.625	9.302	6.75528	7.54354	0.788254	1	0.29777	2.24624	0.234718
0000007_16.tif	predator	LX705	d13	9.802	9.448	6.75528	7.32736	0.572074	1	0.29777	2.18187	0.170346
0000007_16.tif	predator	LX705	d13	8.724	8.635	6.75528	8.62535	1.87006	1	0.29777	2.56837	0.556849
0000007_16.tif	predator	LX705	d13	11.016	9.495	6.75528	6.17892	-0.576366	0	0.29777	1.8399	-0.171625
0000007_16.tif	predator	LX705	d13	11.203	8.25	6.75528	6.60704	-0.148248	0	0.29777	1.96738	-0.0441439
0000007_16.tif	predator	LX705	d13	11.318	8.214	6.75528	6.53192	-0.22336	0	0.29777	1.94501	-0.0665098
0000007_16.tif	predator	LX705	d13	11.432	8.484	6.75528	6.28711	-0.468172	0	0.29777	1.87211	-0.139408
0000007_16.tif	predator	LX705	d13	8.656	7.286	6.75528	9.28142	2.52614	1	0.29777	2.76373	0.752209
0000007_16.tif	predator	LX705	d13	12.198	7.974	6.75528	5.98289	-0.772392	0	0.29777	1.78153	-0.229995
0000007_16.tif	predator	LX705	d13	12.891	8.661	6.75528	5.00938	-1.74591	0	0.29777	1.49164	-0.519879
0000007_16.tif	predator	LX705	d13	12.896	8.49	6.75528	5.11825	-1.63703	0	0.29777	1.52406	-0.487459
0000007_16.tif	predator	LX705	d13	13.188	8.198	6.75528	5.11289	-1.6424	0	0.29777	1.52246	-0.489057
0000007_16.tif	predator	LX705	d13	13.703	8.24	6.75528	4.74091	-2.01437	0	0.29777	1.4117	-0.59982
0000007_16.tif	predator	LX705	d13	13.703	8.115	6.75528	4.83835	-1.91694	0	0.29777	1.44072	-0.570806
0000007_16.tif	predator	LX705	d13	13.917	7.141	6.75528	5.52401	-1.23127	0	0.29777	1.64488	-0.366636
0000007_16.tif	predator	LX705	d13	14.198	6.995	6.75528	5.51743	-1.23785	0	0.29777	1.64293	-0.368594
0000007_16.tif	predator	LX705	d13	13.766	6.833	6.75528	5.86618	-0.889105	0	0.29777	1.74677	-0.264749
0000007_16.tif	predator	LX705	d13	13.578	5.318	6.75528	7.29611	0.54083	1	0.29777	2.17256	0.161043
0000007_16.tif	predator	LX705	d13	13.854	4.276	6.75528	8.14923	1.39395	1	0.29777	2.4266	0.415077
0000007_16.tif	predator	LX705	d13	13.755	4.182	6.75528	8.27213	1.51685	1	0.29777	2.46319	0.451671
0000007_16.tif	predator	LX705	d13	11.786	3.234	6.75528	9.97333	3.21804	1	0.29777	2.96976	0.958236
0000007_16.tif	predator	LX705	d13	13.844	3.286	6.75528	9.0865	2.33122	1	0.29777	2.70569	0.694167
0000007_16.tif	predator	LX705	d13	11.479	4.25	6.75528	9.2726	2.51732	1	0.29777	2.7611	0.749581
0000007_16.tif	predator	LX705	d13	17	4.016	6.75528	7.90058	1.1453	1	0.29777	2.35256	0.341036
0000007_16.tif	predator	LX705	d13	17.094	4.224	6.75528	7.69694	0.941654	1	0.29777	2.29192	0.280396
0000007_16.tif	predator	LX705	d13	17.219	4.292	6.75528	7.63645	0.881169	1	0.29777	2.27391	0.262386
0000007_16.tif	predator	LX705	d13	17.26	4.245	6.75528	7.68621	0.930925	1	0.29777	2.28872	0.277202
0000007_16.tif	predator	LX705	d13	17.677	4.229	6.75528	7.7435	0.988217	1	0.29777	2.30578	0.294261
0000007_16.tif	predator	LX705	d13	17.688	4.438	6.75528	7.53764	0.782352	1	0.29777	2.24448	0.232961
0000007_16.tif	predator	LX705	d13	17.812	4.464	6.75528	7.52912	0.773839	1	0.29777	2.24195	0.230426
0000007_16.tif	predator	LX705	d13	16.339	5.167	6.75528	6.75382	-0.00146777	0	0.29777	2.01108	-0.000437057
0000007_16.tif	predator	LX705	d13	16.568	5.12	6.75528	6.79234	0.0370578	1	0.29777	2.02256	0.0110347
0000007_16.tif	predator	LX705	d13	16.719	5.635	6.75528	6.27602	-0.479263	0	0.29777	1.86881	-0.14271
0000007_16.tif	predator	LX705	d13	17.24	5.141	6.75528	6.79126	0.0359803	1	0.29777	2.02223	0.0107139
0000007_16.tif	predator	LX705	d13	17.505	4.812	6.75528	7.14416	0.388875	1	0.29777	2.12732	0.115795
0000007_16.tif	predator	LX705	d13	17.615	4.807	6.75528	7.1623	0.407017	1	0.29777	2.13272	0.121198
0000007_16.tif	predator	LX705	d13	17.641	5.068	6.75528	6.90699	0.151705	1	0.29777	2.05669	0.0451731
0000007_16.tif	predator	LX705	d13	17.578	5.292	6.75528	6.67658	-0.078699	0	0.29777	1.98809	-0.0234342
0000007_16.tif	predator	LX705	d13	18.255	5.568	6.75528	6.53011	-0.225173	0	0.29777	1.94447	-0.0670497
0000007_16.tif	predator	LX705	d13	16.995	7.276	6.75528	4.64419	-2.1111	0	0.29777	1.3829	-0.628621
0000007_16.tif	predator	LX705	d13	16.943	10.161	6.75528	1.76638	-4.9889	0	0.29777	0.525975	-1.48555
0000007_16.tif	predator	LX705	d13	16.344	10.422	6.75528	1.53167	-5.22362	0	0.29777	0.456084	-1.55544
0000007_16.tif	predator	LX705	d13	17.625	18.115	6.75528	6.27214	-0.483147	0	0.29777	1.86765	-0.143867
0000007_16.tif	predator	LX705	d13	17.776	18.172	6.75528	6.35228	-0.403005	0	0.29777	1.89152	-0.120003
0000007_16.tif	predator	LX705	d13	22.172	19.104	6.75528	9.036	2.28071	1	0.29777	2.69065	0.679127
0000007_16.tif	predator	LX705	d13	22.307	19.052	6.75528	9.07737	2.32209	1	0.29777	2.70297	0.691448
0000007_16.tif	predator	LX705	d13	21.828	18.5	6.75528	8.34749	1.5922	1	0.29777	2.48563	0.47411
0000007_16.tif	predator	LX705	d13	20.854	17.615	6.75528	7.05453	0.299248	1	0.29777	2.10063	0.089107
0000007_16.tif	predator	LX705	d13	20.948	17.547	6.75528	7.05581	0.300531	1	0.29777	2.10101	0.0894891
0000007_16.tif	predator	LX705	d13	21.427	17.052	6.75528	6.98184	0.226554	1	0.29777	2.07898	0.0674609
0000007_16.tif	predator	LX705	d13	22.135	17.786	6.75528	8.00139	1.24611	1	0.29777	2.38257	0.371053
0000007_16.tif	predator	LX705	d13	23.349	17.146	6.75528	8.46017	1.70489	1	0.29777	2.51919	0.507665
0000007_16.tif	predator	LX705	d13	22.531	16.401	6.75528	7.35702	0.601732	1	0.29777	2.1907	0.179178
0000007_16.tif	predator	LX705	d13	22.948	15.76	6.75528	7.33586	0.580575	1	0.29777	2.1844	0.172878
0000007_16.tif	predator	LX705	d13	23.099	15.891	6.75528	7.53321	0.777924	1	0.29777	2.24316	0.231642
0000007_16.tif	predator	LX705	d13	23.24	15.87	6.75528	7.64239	0.887101	1	0.29777	2.27567	0.264152
0000007_16.tif	predator	LX705	d13	23	15.078	6.75528	7.04855	0.293269	1	0.29777	2.09885	0.0873267
0000007_16.tif	predator	LX705	d13	23	14.943	6.75528	6.98894	0.233653	1	0.29777	2.0811	0.0695747
0000007_16.tif	predator	LX705	d13	22.99	14.807	6.75528	6.92194	0.166651	1	0.29777	2.06114	0.0496237
0000007_16.tif	predator	LX705	d13	22.583	14.411	6.75528	6.3894	-0.365886	0	0.29777	1.90257	-0.10895
0000007_16.tif	predator	LX705	d13	23.193	7.953	6.75528	7.6017	0.846418	1	0.29777	2.26356	0.252038
0000007_16.tif	predator	LX705	d13	22.99	7.62	6.75528	7.61177	0.856487	1	0.29777	2.26656	0.255036
0000007_16.tif	predator	LX705	d13	23.182	6.964	6.75528	8.1517	1.39642	1	0.29777	2.42733	0.415812
0000007_16.tif	predator	LX705	d13	23.349	6.609	6.75528	8.5018	1.74651	1	0.29777	2.53158	0.520059
0000007_16.tif	predator	LX705	d13	20.734	6.234	6.75528	6.96256	0.20728	1	0.29777	2.07324	0.0617216
0000007_16.tif	predator	LX705	d13	20.938	6.141	6.75528	7.15738	0.402099	1	0.29777	2.13125	0.119733
0000007_16.tif	predator	LX705	d13	24.25	7.339	6.75528	8.82385	2.06857	1	0.29777	2.62748	0.615958
0000007_16.tif	predator	LX705	d13	24.161	7.594	6.75528	8.61732	1.86204	1	0.29777	2.56598	0.554459
0000007_16.tif	predator	LX705	d13	24.99	8.339	6.75528	9.02405	2.26877	1	0.29777	2.68709	0.675572
0000007_16.tif	predator	LX705	d13	24.547	9.141	6.75528	8.31873	1.56344	1	0.29777	2.47707	0.465547
0000007_16.tif	predator	LX705	d13	25.318	9.953	6.75528	8.8347	2.07942	1	0.29777	2.63071	0.619189
0000007_16.tif	predator	LX705	d13	25.188	12.104	6.75528	8.48719	1.73191	1	0.29777	2.52723	0.515711
0000007_16.tif	predator	LX705	d13	25.339	13.849	6.75528	8.85078	2.0955	1	0.29777	2.6355	0.623976
0000007_16.tif	predator	LX705	d13	25.464	13.99	6.75528	9.0043	2.24901	1	0.29777	2.68121	0.669689
0000007_16.tif	predator	LX705	d13	25.49	14.104	6.75528	9.05652	2.30124	1	0.29777	2.69676	0.68524
0000009_13.tif	control	LX705	d13	5.969	8.812	5.70819	8.31228	2.60409	1	0.29777	2.47515	0.775419
0000009_13.tif	control	LX705	d13	6.036	8.844	5.70819	8.23819	2.53	1	0.29777	2.45309	0.753358
0000009_13.tif	control	LX705	d13	5.964	9.276	5.70819	8.15626	2.44807	1	0.29777	2.42869	0.728961
0000009_13.tif	control	LX705	d13	5.865	9.391	5.70819	8.21428	2.50608	1	0.29777	2.44597	0.746237
0000009_13.tif	control	LX705	d13	5.781	9.38	5.70819	8.29764	2.58945	1	0.29777	2.47079	0.771061
0000009_13.tif	control	LX705	d13	6.276	11.083	5.70819	7.45645	1.74826	1	0.29777	2.22031	0.52058
0000009_13.tif	control	LX705	d13	6.172	11.443	5.70819	7.52964	1.82145	1	0.29777	2.2421	0.542372
0000009_13.tif	control	LX705	d13	6.255	11.667	5.70819	7.43653	1.72833	1	0.29777	2.21437	0.514646
0000009_13.tif	control	LX705	d13	6.984	11.37	5.70819	6.7246	1.01641	1	0.29777	2.00239	0.302656
0000009_13.tif	control	LX705	d13	8.401	12.094	5.70819	5.29071	-0.417487	0	0.29777	1.57541	-0.124315
0000009_13.tif	control	LX705	d13	8.76	12.13	5.70819	4.93355	-0.774641	0	0.29777	1.46906	-0.230665
0000009_13.tif	control	LX705	d13	8.792	12.255	5.70819	4.90914	-0.799049	0	0.29777	1.4618	-0.237933
0000009_13.tif	control	LX705	d13	9.062	12.495	5.70819	4.66462	-1.04357	0	0.29777	1.38898	-0.310745
0000009_13.tif	control	LX705	d13	9.109	12.547	5.70819	4.62505	-1.08315	0	0.29777	1.3772	-0.322529
0000009_13.tif	control	LX705	d13	9.188	12.479	5.70819	4.53761	-1.17059	0	0.29777	1.35116	-0.348565
0000009_13.tif	control	LX705	d13	6.896	12.359	5.70819	6.80776	1.09957	1	0.29777	2.02715	0.327419
0000009_13.tif	control	LX705	d13	7.094	13.005	5.70819	6.68661	0.978414	1	0.29777	1.99107	0.291342
0000009_13.tif	control	LX705	d13	7.219	13.182	5.70819	6.59559	0.887393	1	0.29777	1.96397	0.264239
0000009_13.tif	control	LX705	d13	7.354	14.219	5.70819	6.74655	1.03835	1	0.29777	2.00892	0.30919
0000009_13.tif	control	LX705	d13	7.312	14.375	5.70819	6.84097	1.13277	1	0.29777	2.03703	0.337306
0000009_13.tif	control	LX705	d13	7	14.557	5.70819	7.19793	1.48974	1	0.29777	2.14333	0.4436
0000009_13.tif	control	LX705	d13	7.74	15.271	5.70819	6.83881	1.13062	1	0.29777	2.03639	0.336664
0000009_13.tif	control	LX705	d13	7.807	15.115	5.70819	6.70434	0.996143	1	0.29777	1.99635	0.296621
0000009_13.tif	control	LX705	d13	8.026	15.141	5.70819	6.52597	0.817775	1	0.29777	1.94324	0.243509
0000009_13.tif	control	LX705	d13	9.089	16.984	5.70819	6.85847	1.15027	1	0.29777	2.04225	0.342516
0000009_13.tif	control	LX705	d13	8.979	17.068	5.70819	6.99459	1.28639	1	0.29777	2.08278	0.38305
0000009_13.tif	control	LX705	d13	10.219	17.536	5.70819	6.62145	0.913254	1	0.29777	1.97167	0.27194
0000009_13.tif	control	LX705	d13	10.349	17.359	5.70819	6.4026	0.694407	1	0.29777	1.9065	0.206773
0000009_13.tif	control	LX705	d13	9.448	15.792	5.70819	5.75816	0.0499673	1	0.29777	1.71461	0.0148788
0000009_13.tif	control	LX705	d13	9.62	15.792	5.70819	5.63271	-0.0754819	0	0.29777	1.67725	-0.0224762
0000009_13.tif	control	LX705	d13	9.443	15.229	5.70819	5.39712	-0.311073	0	0.29777	1.6071	-0.0926281
0000009_13.tif	control	LX705	d13	10.089	15.807	5.70819	5.31495	-0.393241	0	0.29777	1.58263	-0.117095
0000009_13.tif	control	LX705	d13	10.24	15.839	5.70819	5.23793	-0.470259	0	0.29777	1.5597	-0.140029
0000009_13.tif	control	LX705	d13	10.349	15.656	5.70819	5.02857	-0.679623	0	0.29777	1.49736	-0.202371
0000009_13.tif	control	LX705	d13	10.323	16.161	5.70819	5.43263	-0.275565	0	0.29777	1.61767	-0.0820551
0000009_13.tif	control	LX705	d13	10.328	16.281	5.70819	5.52429	-0.183899	0	0.29777	1.64497	-0.0547597
0000009_13.tif	control	LX705	d13	10.469	16.354	5.70819	5.4987	-0.209491	0	0.29777	1.63735	-0.0623803
0000009_13.tif	control	LX705	d13	10.552	15.703	5.70819	4.93232	-0.775877	0	0.29777	1.4687	-0.231033
0000009_13.tif	control	LX705	d13	10.63	15.802	5.70819	4.96067	-0.747528	0	0.29777	1.47714	-0.222591
0000009_13.tif	control	LX705	d13	10.703	15.776	5.70819	4.89537	-0.812826	0	0.29777	1.45769	-0.242035
0000009_13.tif	control	LX705	d13	10.479	15.375	5.70819	4.73298	-0.975211	0	0.29777	1.40934	-0.290389
0000009_13.tif	control	LX705	d13	10.552	14.99	5.70819	4.40538	-1.30282	0	0.29777	1.31179	-0.38794
0000009_13.tif	control	LX705	d13	11.089	15.729	5.70819	4.63106	-1.07714	0	0.29777	1.37899	-0.320739
0000009_13.tif	control	LX705	d13	11.729	16.156	5.70819	4.68885	-1.01935	0	0.29777	1.3962	-0.303531
0000009_13.tif	control	LX705	d13	11.943	15.828	5.70819	4.30182	-1.40637	0	0.29777	1.28095	-0.418776
0000009_13.tif	control	LX705	d13	12.047	15.896	5.70819	4.32353	-1.38467	0	0.29777	1.28742	-0.412312
0000009_13.tif	control	LX705	d13	11.901	15.448	5.70819	3.97619	-1.73201	0	0.29777	1.18399	-0.515739
0000009_13.tif	control	LX705	d13	12.302	15.797	5.70819	4.1399	-1.56829	0	0.29777	1.23274	-0.46699
0000009_13.tif	control	LX705	d13	12.604	16.385	5.70819	4.61803	-1.09017	0	0.29777	1.37511	-0.324619
0000009_13.tif	control	LX705	d13	12.672	16.38	5.70819	4.59766	-1.11053	0	0.29777	1.36905	-0.330682
0000009_13.tif	control	LX705	d13	12.979	16.63	5.70819	4.7868	-0.921395	0	0.29777	1.42536	-0.274364
0000009_13.tif	control	LX705	d13	13.062	16.641	5.70819	4.78612	-0.922078	0	0.29777	1.42516	-0.274567
0000009_13.tif	control	LX705	d13	13.052	15.854	5.70819	4.00877	-1.69942	0	0.29777	1.19369	-0.506036
0000009_13.tif	control	LX705	d13	10.073	14.641	5.70819	4.53908	-1.16911	0	0.29777	1.3516	-0.348127
0000009_13.tif	control	LX705	d13	10.344	14.677	5.70819	4.34929	-1.35891	0	0.29777	1.29509	-0.404642
0000009_13.tif	control	LX705	d13	10.391	14.557	5.70819	4.23688	-1.47132	0	0.29777	1.26161	-0.438114
0000009_13.tif	control	LX705	d13	11.547	14.88	5.70819	3.67262	-2.03557	0	0.29777	1.0936	-0.606133
0000009_13.tif	control	LX705	d13	12.135	15.068	5.70819	3.53177	-2.17642	0	0.29777	1.05165	-0.648074
0000009_13.tif	control	LX705	d13	12.151	15.167	5.70819	3.61411	-2.09408	0	0.29777	1.07617	-0.623554
0000009_13.tif	control	LX705	d13	12.365	15.182	5.70819	3.54233	-2.16586	0	0.29777	1.0548	-0.644928
0000009_13.tif	control	LX705	d13	12.698	15.234	5.70819	3.48172	-2.22648	0	0.29777	1.03675	-0.662978
0000009_13.tif	control	LX705	d13	12.661	14.797	5.70819	3.07742	-2.63077	0	0.29777	0.916364	-0.783365
0000009_13.tif	control	LX705	d13	9.74	13.307	5.70819	4.19257	-1.51563	0	0.29777	1.24842	-0.451308
0000009_13.tif	control	LX705	d13	9.469	12.932	5.70819	4.34434	-1.36386	0	0.29777	1.29361	-0.406116
0000009_13.tif	control	LX705	d13	11.005	13.245	5.70819	3.00305	-2.70515	0	0.29777	0.894217	-0.805512
0000009_13.tif	control	LX705	d13	11.318	13.797	5.70819	3.03821	-2.66999	0	0.29777	0.904687	-0.795042
0000009_13.tif	control	LX705	d13	11.609	13.932	5.70819	2.9099	-2.79829	0	0.29777	0.866482	-0.833247
0000009_13.tif	control	LX705	d13	11.958	13.927	5.70819	2.66793	-3.04026	0	0.29777	0.79443	-0.905299
0000009_13.tif	control	LX705	d13	12.01	13.214	5.70819	2.13373	-3.57446	0	0.29777	0.635361	-1.06437
0000009_13.tif	control	LX705	d13	9.312	11.443	5.70819	4.39938	-1.30881	0	0.29777	1.31	-0.389724
0000009_13.tif	control	LX705	d13	9.37	11.578	5.70819	4.32969	-1.3785	0	0.29777	1.28925	-0.410476
0000009_13.tif	control	LX705	d13	9.469	11.906	5.70819	4.21901	-1.48918	0	0.29777	1.2563	-0.443434
0000009_13.tif	control	LX705	d13	9.63	12.01	5.70819	4.0596	-1.64859	0	0.29777	1.20883	-0.490901
0000009_13.tif	control	LX705	d13	9.271	10.38	5.70819	4.66992	-1.03827	0	0.29777	1.39056	-0.309167
0000009_13.tif	control	LX705	d13	9.276	10.568	5.70819	4.60753	-1.10066	0	0.29777	1.37198	-0.327745
0000009_13.tif	control	LX705	d13	9.63	11.083	5.70819	4.13864	-1.56955	0	0.29777	1.23236	-0.467366
0000009_13.tif	control	LX705	d13	10.635	10.792	5.70819	3.24648	-2.46171	0	0.29777	0.966704	-0.733025
0000009_13.tif	control	LX705	d13	10.323	12.297	5.70819	3.38881	-2.31938	0	0.29777	1.00909	-0.690643
0000009_13.tif	control	LX705	d13	11.026	11.979	5.70819	2.66329	-3.0449	0	0.29777	0.793049	-0.90668
0000009_13.tif	control	LX705	d13	11.099	11.964	5.70819	2.58989	-3.1183	0	0.29777	0.771192	-0.928536
0000009_13.tif	control	LX705	d13	11.568	12.297	5.70819	2.15759	-3.5506	0	0.29777	0.642466	-1.05726
0000009_13.tif	control	LX705	d13	11.615	12.062	5.70819	2.07964	-3.62856	0	0.29777	0.619253	-1.08048
0000009_13.tif	control	LX705	d13	11.698	11.964	5.70819	1.99116	-3.71703	0	0.29777	0.592908	-1.10682
0000009_13.tif	control	LX705	d13	12.62	12.391	5.70819	1.17714	-4.53106	0	0.29777	0.350516	-1.34921
0000009_13.tif	control	LX705	d13	12.615	12.302	5.70819	1.14724	-4.56095	0	0.29777	0.341614	-1.35811
0000009_13.tif	control	LX705	d13	12.682	12.302	5.70819	1.08484	-4.62336	0	0.29777	0.323032	-1.3767
0000009_13.tif	control	LX705	d13	11.318	10.062	5.70819	2.99674	-2.71145	0	0.29777	0.89234	-0.807389
0000009_13.tif	control	LX705	d13	11.448	10.167	5.70819	2.82967	-2.87852	0	0.29777	0.842591	-0.857137
0000009_13.tif	control	LX705	d13	11.589	9.734	5.70819	3.01331	-2.69488	0	0.29777	0.897274	-0.802455
0000009_13.tif	control	LX705	d13	12.01	9.656	5.70819	2.7988	-2.90939	0	0.29777	0.833399	-0.86633
0000009_13.tif	control	LX705	d13	11.927	11.172	5.70819	1.90402	-3.80417	0	0.29777	0.56696	-1.13277
0000009_13.tif	control	LX705	d13	12.026	11.328	5.70819	1.75638	-3.95181	0	0.29777	0.522997	-1.17673
0000009_13.tif	control	LX705	d13	12.016	11.422	5.70819	1.73789	-3.9703	0	0.29777	0.517491	-1.18224
0000009_13.tif	control	LX705	d13	12.135	11.443	5.70819	1.61772	-4.09047	0	0.29777	0.481708	-1.21802
0000009_13.tif	control	LX705	d13	12.167	11.375	5.70819	1.60776	-4.10044	0	0.29777	0.478742	-1.22099
0000009_13.tif	control	LX705	d13	12.776	10.802	5.70819	1.42428	-4.28391	0	0.29777	0.424109	-1.27562
0000009_13.tif	control	LX705	d13	13.083	10.714	5.70819	1.32784	-4.38036	0	0.29777	0.39539	-1.30434
0000009_13.tif	control	LX705	d13	13.047	10.802	5.70819	1.26796	-4.44024	0	0.29777	0.37756	-1.32217
0000009_13.tif	control	LX705	d13	13.401	11.339	5.70819	0.626592	-5.0816	0	0.29777	0.18658	-1.51315
0000009_13.tif	control	LX705	d13	13.542	11.115	5.70819	0.794529	-4.91366	0	0.29777	0.236587	-1.46314
0000009_13.tif	control	LX705	d13	13.594	10.911	5.70819	0.989475	-4.71872	0	0.29777	0.294636	-1.40509
0000009_13.tif	control	LX705	d13	13.797	11.276	5.70819	0.629509	-5.07868	0	0.29777	0.187449	-1.51228
0000009_13.tif	control	LX705	d13	13.964	11.156	5.70819	0.789795	-4.9184	0	0.29777	0.235177	-1.46455
0000009_13.tif	control	LX705	d13	13.979	11.344	5.70819	0.624007	-5.08419	0	0.29777	0.185811	-1.51392
0000009_13.tif	control	LX705	d13	14.052	11.333	5.70819	0.670422	-5.03777	0	0.29777	0.199631	-1.5001
0000009_13.tif	control	LX705	d13	14.073	11.25	5.70819	0.752025	-4.95617	0	0.29777	0.22393	-1.4758
0000009_13.tif	control	LX705	d13	13.589	11.885	5.70819	0.0996092	-5.60858	0	0.29777	0.0296606	-1.67007
0000009_13.tif	control	LX705	d13	13.542	12.135	5.70819	0.280066	-5.42813	0	0.29777	0.0833953	-1.61633
0000009_13.tif	control	LX705	d13	13.344	12.354	5.70819	0.5728	-5.13539	0	0.29777	0.170563	-1.52917
0000009_13.tif	control	LX705	d13	12.87	13.526	5.70819	1.82374	-3.88445	0	0.29777	0.543055	-1.15667
0000009_13.tif	control	LX705	d13	13.005	13.24	5.70819	1.50759	-4.2006	0	0.29777	0.448915	-1.25081
0000009_13.tif	control	LX705	d13	12.714	13.87	5.70819	2.20122	-3.50698	0	0.29777	0.655456	-1.04427
0000009_13.tif	control	LX705	d13	14.224	14.318	5.70819	2.4806	-3.22759	0	0.29777	0.738648	-0.96108
0000009_13.tif	control	LX705	d13	15.161	14.51	5.70819	3.00045	-2.70774	0	0.29777	0.893445	-0.806284
0000009_13.tif	control	LX705	d13	15.74	14.448	5.70819	3.27466	-2.43353	0	0.29777	0.975096	-0.724633
0000009_13.tif	control	LX705	d13	15.615	15.375	5.70819	3.97703	-1.73116	0	0.29777	1.18424	-0.515488
0000009_13.tif	control	LX705	d13	15.516	15.438	5.70819	3.98589	-1.7223	0	0.29777	1.18688	-0.512849
0000009_13.tif	control	LX705	d13	15.578	15.505	5.70819	4.07394	-1.63425	0	0.29777	1.2131	-0.486632
0000009_13.tif	control	LX705	d13	14.969	15.37	5.70819	3.70265	-2.00554	0	0.29777	1.10254	-0.59719
0000009_13.tif	control	LX705	d13	15.125	16.193	5.70819	4.53091	-1.17728	0	0.29777	1.34917	-0.350559
0000009_13.tif	control	LX705	d13	15.411	16.203	5.70819	4.63886	-1.06934	0	0.29777	1.38131	-0.318417
0000009_13.tif	control	LX705	d13	15.344	16.089	5.70819	4.50817	-1.20002	0	0.29777	1.3424	-0.357331
0000009_13.tif	control	LX705	d13	14.76	12.672	5.70819	1.32339	-4.3848	0	0.29777	0.394066	-1.30566
0000009_13.tif	control	LX705	d13	13.891	11.865	5.70819	0.205353	-5.50284	0	0.29777	0.0611481	-1.63858
0000009_13.tif	control	LX705	d13	14.005	11.958	5.70819	0.323006	-5.38519	0	0.29777	0.0961816	-1.60355
0000009_13.tif	control	LX705	d13	14.068	11.885	5.70819	0.380159	-5.32803	0	0.29777	0.1132	-1.58653
0000009_13.tif	control	LX705	d13	14.167	11.859	5.70819	0.480427	-5.22777	0	0.29777	0.143057	-1.55667
0000009_13.tif	control	LX705	d13	14.245	11.839	5.70819	0.559909	-5.14828	0	0.29777	0.166724	-1.533
0000009_13.tif	control	LX705	d13	14.188	12.057	5.70819	0.525282	-5.18291	0	0.29777	0.156413	-1.54332
0000009_13.tif	control	LX705	d13	14.307	11.99	5.70819	0.626097	-5.0821	0	0.29777	0.186433	-1.5133
0000009_13.tif	control	LX705	d13	14.417	11.75	5.70819	0.743476	-4.96472	0	0.29777	0.221385	-1.47834
0000009_13.tif	control	LX705	d13	15.646	11.312	5.70819	2.04324	-3.66496	0	0.29777	0.608415	-1.09131
0000009_13.tif	control	LX705	d13	15.62	11.193	5.70819	2.05593	-3.65227	0	0.29777	0.612193	-1.08754
0000009_13.tif	control	LX705	d13	14.755	10.896	5.70819	1.46236	-4.24584	0	0.29777	0.435446	-1.26428
0000009_13.tif	control	LX705	d13	14.771	10.807	5.70819	1.53584	-4.17235	0	0.29777	0.457328	-1.2424
0000009_13.tif	control	LX705	d13	14.224	10.953	5.70819	1.08469	-4.62351	0	0.29777	0.322987	-1.37674
0000009_13.tif	control	LX705	d13	14.219	10.505	5.70819	1.48891	-4.21929	0	0.29777	0.443352	-1.25638
0000009_13.tif	control	LX705	d13	12.766	9.906	5.70819	2.19321	-3.51498	0	0.29777	0.653073	-1.04666
0000009_13.tif	control	LX705	d13	13.406	9.698	5.70819	2.21602	-3.49218	0	0.29777	0.659863	-1.03987
0000009_13.tif	control	LX705	d13	13.479	9.99	5.70819	1.91742	-3.79077	0	0.29777	0.570952	-1.12878
0000009_13.tif	control	LX705	d13	13.87	10.026	5.70819	1.87884	-3.82936	0	0.29777	0.559461	-1.14027
0000009_13.tif	control	LX705	d13	13.62	9.365	5.70819	2.53191	-3.17628	0	0.29777	0.753928	-0.945801
0000009_13.tif	control	LX705	d13	15.365	10.38	5.70819	2.26066	-3.44753	0	0.29777	0.673157	-1.02657
0000009_13.tif	control	LX705	d13	15.438	10.255	5.70819	2.39904	-3.30916	0	0.29777	0.714361	-0.985367
0000009_13.tif	control	LX705	d13	15.542	10.208	5.70819	2.50732	-3.20087	0	0.29777	0.746605	-0.953124
0000009_13.tif	control	LX705	d13	15.333	10.073	5.70819	2.45547	-3.25272	0	0.29777	0.731167	-0.968562
0000009_13.tif	control	LX705	d13	10.797	8.599	5.70819	4.38498	-1.32321	0	0.29777	1.30572	-0.394012
0000009_13.tif	control	LX705	d13	11.323	8.661	5.70819	4.0073	-1.70089	0	0.29777	1.19325	-0.506475
0000009_13.tif	control	LX705	d13	11.151	9.01	5.70819	3.84257	-1.86562	0	0.29777	1.1442	-0.555526
0000009_13.tif	control	LX705	d13	12.167	9.031	5.70819	3.24371	-2.46448	0	0.29777	0.96588	-0.733849
0000009_13.tif	control	LX705	d13	12.068	8.911	5.70819	3.39627	-2.31193	0	0.29777	1.01131	-0.688423
0000009_13.tif	control	LX705	d13	12.396	8.661	5.70819	3.48346	-2.22473	0	0.29777	1.03727	-0.662459
0000009_13.tif	control	LX705	d13	12.552	8.599	5.70819	3.48722	-2.22097	0	0.29777	1.03839	-0.661339
0000009_13.tif	control	LX705	d13	13.911	8.266	5.70819	3.63684	-2.07135	0	0.29777	1.08294	-0.616786
0000009_13.tif	control	LX705	d13	14.318	8.531	5.70819	3.42347	-2.28473	0	0.29777	1.01941	-0.680323
0000009_13.tif	control	LX705	d13	14.865	8.578	5.70819	3.52058	-2.18762	0	0.29777	1.04832	-0.651407
0000009_13.tif	control	LX705	d13	15.521	8.927	5.70819	3.48925	-2.21895	0	0.29777	1.03899	-0.660735
0000009_13.tif	control	LX705	d13	15.552	8.682	5.70819	3.71541	-1.99278	0	0.29777	1.10634	-0.59339
0000009_13.tif	control	LX705	d13	15.708	8.839	5.70819	3.6641	-2.04409	0	0.29777	1.09106	-0.608669
0000009_13.tif	control	LX705	d13	15.719	8.734	5.70819	3.75809	-1.95011	0	0.29777	1.11905	-0.580684
0000009_13.tif	control	LX705	d13	15.729	8.656	5.70819	3.82927	-1.87893	0	0.29777	1.14024	-0.559488
0000009_13.tif	control	LX705	d13	15.484	7.172	5.70819	5.05389	-0.654305	0	0.29777	1.5049	-0.194832
0000009_13.tif	control	LX705	d13	15.812	7.094	5.70819	5.25077	-0.457424	0	0.29777	1.56352	-0.136207
0000009_13.tif	control	LX705	d13	16.073	7.188	5.70819	5.27764	-0.430553	0	0.29777	1.57152	-0.128206
0000009_13.tif	control	LX705	d13	15.818	7.615	5.70819	4.78162	-0.926577	0	0.29777	1.42382	-0.275907
0000009_13.tif	control	LX705	d13	15.891	7.635	5.70819	4.7968	-0.911389	0	0.29777	1.42834	-0.271384
0000009_13.tif	control	LX705	d13	16.266	7.464	5.70819	5.12725	-0.580942	0	0.29777	1.52674	-0.172987
0000009_13.tif	control	LX705	d13	16.578	7.505	5.70819	5.25671	-0.451485	0	0.29777	1.56529	-0.134439
0000009_13.tif	control	LX705	d13	16.589	7.63	5.70819	5.15893	-0.549264	0	0.29777	1.53617	-0.163554
0000009_13.tif	control	LX705	d13	16.979	8.177	5.70819	4.96605	-0.742145	0	0.29777	1.47874	-0.220988
0000009_13.tif	control	LX705	d13	16.594	8.76	5.70819	4.27543	-1.43276	0	0.29777	1.2731	-0.426633
0000009_13.tif	control	LX705	d13	16.214	8.927	5.70819	3.89816	-1.81004	0	0.29777	1.16075	-0.538974
0000009_13.tif	control	LX705	d13	16.286	8.974	5.70819	3.90995	-1.79825	0	0.29777	1.16427	-0.535464
0000009_13.tif	control	LX705	d13	15.891	8.802	5.70819	3.79816	-1.91003	0	0.29777	1.13098	-0.56875
0000009_13.tif	control	LX705	d13	17.63	8.911	5.70819	4.94465	-0.763541	0	0.29777	1.47237	-0.22736
0000009_13.tif	control	LX705	d13	17.812	9.302	5.70819	4.87198	-0.836211	0	0.29777	1.45073	-0.248999
0000009_13.tif	control	LX705	d13	17.766	9.401	5.70819	4.7807	-0.927492	0	0.29777	1.42355	-0.276179
0000009_13.tif	control	LX705	d13	18.042	11.24	5.70819	4.40314	-1.30505	0	0.29777	1.31112	-0.388605
0000009_13.tif	control	LX705	d13	18.714	11.047	5.70819	5.0972	-0.610991	0	0.29777	1.51779	-0.181935
0000009_13.tif	control	LX705	d13	18.99	11.156	5.70819	5.35339	-0.354802	0	0.29777	1.59408	-0.105649
0000009_13.tif	control	LX705	d13	18.26	11.953	5.70819	4.57236	-1.13584	0	0.29777	1.36151	-0.338219
0000009_13.tif	control	LX705	d13	18.385	11.854	5.70819	4.69719	-1.01101	0	0.29777	1.39868	-0.301047
0000009_13.tif	control	LX705	d13	18.443	12.208	5.70819	4.76522	-0.942969	0	0.29777	1.41894	-0.280788
0000009_13.tif	control	LX705	d13	18.802	11.906	5.70819	5.11401	-0.594184	0	0.29777	1.5228	-0.17693
0000009_13.tif	control	LX705	d13	18.979	12.24	5.70819	5.30217	-0.406023	0	0.29777	1.57883	-0.120901
0000009_13.tif	control	LX705	d13	19.188	12.198	5.70819	5.50829	-0.199908	0	0.29777	1.6402	-0.0595267
0000009_13.tif	control	LX705	d13	16.87	12.286	5.70819	3.20581	-2.50238	0	0.29777	0.954594	-0.745134
0000009_13.tif	control	LX705	d13	16.958	12.281	5.70819	3.29259	-2.41561	0	0.29777	0.980433	-0.719295
0000009_13.tif	control	LX705	d13	15.891	13.193	5.70819	2.55645	-3.15175	0	0.29777	0.761233	-0.938496
0000009_13.tif	control	LX705	d13	17.156	13.406	5.70819	3.78248	-1.92572	0	0.29777	1.12631	-0.573421
0000009_13.tif	control	LX705	d13	17.333	12.365	5.70819	3.67505	-2.03314	0	0.29777	1.09432	-0.605409
0000009_13.tif	control	LX705	d13	17.401	12.323	5.70819	3.73747	-1.97072	0	0.29777	1.11291	-0.586822
0000009_13.tif	control	LX705	d13	17.714	12.234	5.70819	4.04016	-1.66803	0	0.29777	1.20304	-0.496689
0000009_13.tif	control	LX705	d13	18.057	12.443	5.70819	4.40311	-1.30508	0	0.29777	1.31111	-0.388615
0000009_13.tif	control	LX705	d13	18.109	12.604	5.70819	4.47733	-1.23086	0	0.29777	1.33322	-0.366514
0000009_13.tif	control	LX705	d13	18.177	12.714	5.70819	4.56292	-1.14527	0	0.29777	1.3587	-0.341028
0000009_13.tif	control	LX705	d13	18.349	12.594	5.70819	4.71297	-0.995219	0	0.29777	1.40338	-0.296346
0000009_13.tif	control	LX705	d13	18.385	12.667	5.70819	4.75986	-0.948335	0	0.29777	1.41734	-0.282386
0000009_13.tif	control	LX705	d13	18.354	13.031	5.70819	4.80206	-0.906133	0	0.29777	1.42991	-0.269819
0000009_13.tif	control	LX705	d13	18.672	12.589	5.70819	5.03195	-0.676245	0	0.29777	1.49836	-0.201365
0000009_13.tif	control	LX705	d13	19.245	12.458	5.70819	5.58535	-0.122847	0	0.29777	1.66315	-0.0365802
0000009_13.tif	control	LX705	d13	19.651	13.234	5.70819	6.11127	0.403076	1	0.29777	1.81975	0.120024
0000009_13.tif	control	LX705	d13	18.568	13.599	5.70819	5.16862	-0.539576	0	0.29777	1.53906	-0.160669
0000009_13.tif	control	LX705	d13	18.479	13.672	5.70819	5.10958	-0.598609	0	0.29777	1.52148	-0.178248
0000009_13.tif	control	LX705	d13	16.036	14.37	5.70819	3.41083	-2.29736	0	0.29777	1.01564	-0.684085
0000009_13.tif	control	LX705	d13	15.995	15.839	5.70819	4.56831	-1.13988	0	0.29777	1.36031	-0.339422
0000009_13.tif	control	LX705	d13	16.115	16.5	5.70819	5.20453	-0.503662	0	0.29777	1.54975	-0.149976
0000009_13.tif	control	LX705	d13	16.188	16.49	5.70819	5.23019	-0.478008	0	0.29777	1.55739	-0.142337
0000010_23.tif	predator	N2	wt	8.266	5.479	5.90125	8.54133	2.64008	1	0.29777	2.54335	0.786137
0000010_23.tif	predator	N2	wt	8.49	5.667	5.90125	8.24899	2.34775	1	0.29777	2.4563	0.699089
0000010_23.tif	predator	N2	wt	6.88	7.141	5.90125	8.74894	2.8477	1	0.29777	2.60517	0.847958
0000010_23.tif	predator	N2	wt	6.833	7.307	5.90125	8.71649	2.81524	1	0.29777	2.59551	0.838295
0000010_23.tif	predator	N2	wt	9.234	7.651	5.90125	6.45232	0.551075	1	0.29777	1.92131	0.164093
0000010_23.tif	predator	N2	wt	9.25	7.714	5.90125	6.40494	0.503694	1	0.29777	1.9072	0.149985
0000010_23.tif	predator	N2	wt	9.682	8.005	5.90125	5.8843	-0.0169493	0	0.29777	1.75217	-0.00504698
0000010_23.tif	predator	N2	wt	9.422	8.406	5.90125	5.90994	0.00869116	1	0.29777	1.7598	0.00258797
0000010_23.tif	predator	N2	wt	9.203	8.401	5.90125	6.10716	0.205912	1	0.29777	1.81853	0.0613143
0000010_23.tif	predator	N2	wt	8.812	8.141	5.90125	6.57349	0.672247	1	0.29777	1.95739	0.200175
0000010_23.tif	predator	N2	wt	8.094	8.286	5.90125	7.16076	1.25952	1	0.29777	2.13226	0.375046
0000010_23.tif	predator	N2	wt	7.833	8.448	5.90125	7.33988	1.43863	1	0.29777	2.1856	0.428382
0000010_23.tif	predator	N2	wt	8.771	8.672	5.90125	6.38655	0.485308	1	0.29777	1.90172	0.14451
0000010_23.tif	predator	N2	wt	5.219	13.104	5.90125	9.6439	3.74265	1	0.29777	2.87166	1.11445
0000010_23.tif	predator	N2	wt	5.771	13.062	5.90125	9.09518	3.19394	1	0.29777	2.70827	0.951059
0000010_23.tif	predator	N2	wt	6.995	13.953	5.90125	8.16547	2.26422	1	0.29777	2.43143	0.674218
0000010_23.tif	predator	N2	wt	7.349	14.854	5.90125	8.20071	2.29947	1	0.29777	2.44193	0.684713
0000010_23.tif	predator	N2	wt	7.318	15.755	5.90125	8.67229	2.77105	1	0.29777	2.58235	0.825135
0000010_23.tif	predator	N2	wt	7.698	16.13	5.90125	8.56583	2.66459	1	0.29777	2.55065	0.793434
0000010_23.tif	predator	N2	wt	6.812	16.5	5.90125	9.50398	3.60274	1	0.29777	2.83	1.07279
0000010_23.tif	predator	N2	wt	8.193	16.448	5.90125	8.36656	2.46531	1	0.29777	2.49131	0.734096
0000010_23.tif	predator	N2	wt	8.115	16.24	5.90125	8.29759	2.39634	1	0.29777	2.47077	0.713558
0000010_23.tif	predator	N2	wt	8.854	15.052	5.90125	7.00123	1.09998	1	0.29777	2.08476	0.327541
0000010_23.tif	predator	N2	wt	9.938	15.391	5.90125	6.35368	0.452433	1	0.29777	1.89193	0.134721
0000010_23.tif	predator	N2	wt	10.042	15.359	5.90125	6.25513	0.353888	1	0.29777	1.86259	0.105377
0000010_23.tif	predator	N2	wt	10.214	15.51	5.90125	6.2341	0.332852	1	0.29777	1.85633	0.0991134
0000010_23.tif	predator	N2	wt	10.312	16.484	5.90125	6.88923	0.987982	1	0.29777	2.05141	0.294191
0000010_23.tif	predator	N2	wt	10.557	17.026	5.90125	7.17468	1.27344	1	0.29777	2.1364	0.379191
0000010_23.tif	predator	N2	wt	7.922	17.453	5.90125	9.23339	3.33214	1	0.29777	2.74943	0.992212
0000010_23.tif	predator	N2	wt	7.917	17.552	5.90125	9.30497	3.40372	1	0.29777	2.77074	1.01353
0000010_23.tif	predator	N2	wt	8.036	17.495	5.90125	9.17954	3.27829	1	0.29777	2.73339	0.976178
0000010_23.tif	predator	N2	wt	8.901	17.672	5.90125	8.70813	2.80689	1	0.29777	2.59302	0.835807
0000010_23.tif	predator	N2	wt	9.13	18.104	5.90125	8.89243	2.99119	1	0.29777	2.6479	0.890685
0000010_23.tif	predator	N2	wt	9.188	17.917	5.90125	8.71022	2.80897	1	0.29777	2.59364	0.836428
0000010_23.tif	predator	N2	wt	8.906	18.917	5.90125	9.674	3.77275	1	0.29777	2.88063	1.12341
0000010_23.tif	predator	N2	wt	10.531	19.172	5.90125	9.03072	3.12947	1	0.29777	2.68908	0.931863
0000010_23.tif	predator	N2	wt	10.932	19.307	5.90125	8.97714	3.07589	1	0.29777	2.67312	0.915908
0000010_23.tif	predator	N2	wt	10.557	19.76	5.90125	9.5462	3.64496	1	0.29777	2.84257	1.08536
0000010_23.tif	predator	N2	wt	13.901	20.198	5.90125	9.08883	3.18759	1	0.29777	2.70638	0.949167
0000010_23.tif	predator	N2	wt	12.177	19.151	5.90125	8.38632	2.48507	1	0.29777	2.49719	0.739981
0000010_23.tif	predator	N2	wt	12.323	19.255	5.90125	8.44412	2.54288	1	0.29777	2.51441	0.757193
0000010_23.tif	predator	N2	wt	11.87	17.75	5.90125	7.17416	1.27291	1	0.29777	2.13625	0.379036
0000010_23.tif	predator	N2	wt	11.943	17.682	5.90125	7.08323	1.18199	1	0.29777	2.10917	0.351961
0000010_23.tif	predator	N2	wt	12.276	18.042	5.90125	7.30151	1.40026	1	0.29777	2.17417	0.416956
0000010_23.tif	predator	N2	wt	13.292	18.25	5.90125	7.23962	1.33837	1	0.29777	2.15574	0.398527
0000010_23.tif	predator	N2	wt	13.224	18.906	5.90125	7.89685	1.9956	1	0.29777	2.35144	0.59423
0000010_23.tif	predator	N2	wt	13.271	19.432	5.90125	8.40671	2.50547	1	0.29777	2.50327	0.746052
0000010_23.tif	predator	N2	wt	13.427	5.786	5.90125	5.49534	-0.405903	0	0.29777	1.63635	-0.120866
0000010_23.tif	predator	N2	wt	14.688	6.177	5.90125	4.96407	-0.937172	0	0.29777	1.47815	-0.279062
0000010_23.tif	predator	N2	wt	10	3.099	5.90125	9.29509	3.39384	1	0.29777	2.7678	1.01059
0000010_23.tif	predator	N2	wt	10.135	2.984	5.90125	9.32852	3.42728	1	0.29777	2.77775	1.02054
0000010_23.tif	predator	N2	wt	13.802	2.057	5.90125	9.12452	3.22328	1	0.29777	2.71701	0.959796
0000010_23.tif	predator	N2	wt	15.74	2.073	5.90125	9.13197	3.23072	1	0.29777	2.71923	0.962013
0000010_23.tif	predator	N2	wt	15.729	2.297	5.90125	8.90825	3.00701	1	0.29777	2.65261	0.895397
0000010_23.tif	predator	N2	wt	15.677	4.01	5.90125	7.20301	1.30177	1	0.29777	2.14484	0.387628
0000010_23.tif	predator	N2	wt	15.51	4.12	5.90125	7.07215	1.1709	1	0.29777	2.10587	0.348659
0000010_23.tif	predator	N2	wt	17.797	1.724	5.90125	9.92544	4.0242	1	0.29777	2.9555	1.19828
0000010_23.tif	predator	N2	wt	18.734	2.333	5.90125	9.70413	3.80289	1	0.29777	2.8896	1.13239
0000010_23.tif	predator	N2	wt	19.755	13.156	5.90125	5.47805	-0.423192	0	0.29777	1.6312	-0.126014
0000010_23.tif	predator	N2	wt	15.88	16.573	5.90125	5.5671	-0.334147	0	0.29777	1.65771	-0.0994988
0000010_23.tif	predator	N2	wt	16.245	19.005	5.90125	8.02194	2.1207	1	0.29777	2.38869	0.63148
0000010_23.tif	predator	N2	wt	17.474	19.172	5.90125	8.5094	2.60816	1	0.29777	2.53384	0.776631
0000010_23.tif	predator	N2	wt	17.557	18.792	5.90125	8.18075	2.2795	1	0.29777	2.43598	0.678767
0000010_23.tif	predator	N2	wt	17.812	19.833	5.90125	9.24552	3.34428	1	0.29777	2.75304	0.995825
0000010_23.tif	predator	N2	wt	17.24	20.729	5.90125	9.9288	4.02755	1	0.29777	2.9565	1.19928
0000010_23.tif	predator	N2	wt	17.406	20.766	5.90125	10.0088	4.10753	1	0.29777	2.98031	1.2231
0000010_23.tif	predator	N2	wt	17.521	20.802	5.90125	10.0754	4.1742	1	0.29777	3.00016	1.24295
0000010_23.tif	predator	N2	wt	17.708	20.594	5.90125	9.93194	4.03069	1	0.29777	2.95743	1.20022
0000010_23.tif	predator	N2	wt	18.13	20.208	5.90125	9.70796	3.80671	1	0.29777	2.89074	1.13352
0000010_23.tif	predator	N2	wt	18.229	20.089	5.90125	9.63314	3.73189	1	0.29777	2.86846	1.11125
0000010_23.tif	predator	N2	wt	18.344	20.146	5.90125	9.72906	3.82781	1	0.29777	2.89702	1.13981
0000010_23.tif	predator	N2	wt	18.411	20.656	5.90125	10.2273	4.32606	1	0.29777	3.04538	1.28817
0000010_23.tif	predator	N2	wt	19.01	19.891	5.90125	9.7712	3.86995	1	0.29777	2.90957	1.15236
0000010_23.tif	predator	N2	wt	19.182	19.891	5.90125	9.84896	3.94771	1	0.29777	2.93272	1.17551
0000010_23.tif	predator	N2	wt	19.271	19.307	5.90125	9.3774	3.47616	1	0.29777	2.79231	1.0351
0000010_23.tif	predator	N2	wt	19.208	19.203	5.90125	9.25587	3.35462	1	0.29777	2.75612	0.998905
0000010_23.tif	predator	N2	wt	18.891	18.385	5.90125	8.38859	2.48734	1	0.29777	2.49787	0.740657
0000010_23.tif	predator	N2	wt	19.693	18.172	5.90125	8.64615	2.74491	1	0.29777	2.57457	0.817352
0000010_23.tif	predator	N2	wt	21.073	6.047	5.90125	8.18917	2.28793	1	0.29777	2.43849	0.681277
0000010_23.tif	predator	N2	wt	21.208	6.177	5.90125	8.21611	2.31487	1	0.29777	2.44651	0.689298
0000010_23.tif	predator	N2	wt	21.458	5.948	5.90125	8.55374	2.65249	1	0.29777	2.54705	0.789833
0000010_23.tif	predator	N2	wt	22.208	5.766	5.90125	9.26541	3.36417	1	0.29777	2.75896	1.00175
0000010_23.tif	predator	N2	wt	21.844	6.573	5.90125	8.51247	2.61122	1	0.29777	2.53476	0.777544
0000010_23.tif	predator	N2	wt	22.958	6.672	5.90125	9.42402	3.52278	1	0.29777	2.80619	1.04898
0000010_23.tif	predator	N2	wt	23.115	6.828	5.90125	9.49063	3.58939	1	0.29777	2.82603	1.06881
0000010_23.tif	predator	N2	wt	22.484	7.938	5.90125	8.45332	2.55207	1	0.29777	2.51714	0.75993
0000010_23.tif	predator	N2	wt	23.911	7.224	5.90125	10.0452	4.14392	1	0.29777	2.99115	1.23394
0000010_23.tif	predator	N2	wt	23.63	9.5	5.90125	9.11789	3.21664	1	0.29777	2.71503	0.957819
0000010_23.tif	predator	N2	wt	23.214	10.521	5.90125	8.57544	2.6742	1	0.29777	2.55351	0.796296
0000010_23.tif	predator	N2	wt	22.344	11.193	5.90125	7.68318	1.78193	1	0.29777	2.28782	0.530606
0000010_23.tif	predator	N2	wt	22.208	11.411	5.90125	7.55183	1.65058	1	0.29777	2.24871	0.491494
0000010_23.tif	predator	N2	wt	23.083	12.323	5.90125	8.50454	2.6033	1	0.29777	2.5324	0.775183
0000010_23.tif	predator	N2	wt	23.734	12.172	5.90125	9.13139	3.23015	1	0.29777	2.71905	0.96184
0000010_23.tif	predator	N2	wt	23.599	11.932	5.90125	8.97293	3.07169	1	0.29777	2.67187	0.914656
0000010_23.tif	predator	N2	wt	23.828	11.51	5.90125	9.17442	3.27318	1	0.29777	2.73187	0.974654
0000010_23.tif	predator	N2	wt	24.016	13.594	5.90125	9.67126	3.77001	1	0.29777	2.87981	1.1226
0000010_23.tif	predator	N2	wt	24.146	13.708	5.90125	9.82623	3.92498	1	0.29777	2.92596	1.16874
0000010_23.tif	predator	N2	wt	23.036	14.578	5.90125	9.05282	3.15158	1	0.29777	2.69566	0.938445
0000010_23.tif	predator	N2	wt	23.693	15.318	5.90125	9.9511	4.04985	1	0.29777	2.96314	1.20592
0000010_23.tif	predator	N2	wt	24.104	16.146	5.90125	10.6874	4.78614	1	0.29777	3.18238	1.42517
0000010_23.tif	predator	N2	wt	21.302	17.161	5.90125	8.96344	3.0622	1	0.29777	2.66904	0.91183
0000010_23.tif	predator	N2	wt	25.349	11.606	5.90125	10.6981	4.79687	1	0.29777	3.18558	1.42836
00000011_1.tif	control	IV984	d14	7.333	6.948	5.99455	9.50155	3.507	1	0.29777	2.82928	1.04428
00000011_1.tif	control	IV984	d14	5.224	9.766	5.99455	10.6939	4.69931	1	0.29777	3.18431	1.39931
00000011_1.tif	control	IV984	d14	5.193	9.932	5.99455	10.7033	4.70871	1	0.29777	3.18711	1.40211
00000011_1.tif	control	IV984	d14	5.297	10.172	5.99455	10.5735	4.57891	1	0.29777	3.14846	1.36346
00000011_1.tif	control	IV984	d14	6.589	10.328	5.99455	9.27239	3.27784	1	0.29777	2.76104	0.976043
00000011_1.tif	control	IV984	d14	7.271	9.354	5.99455	8.74918	2.75463	1	0.29777	2.60524	0.820245
00000011_1.tif	control	IV984	d14	7.474	9.875	5.99455	8.45235	2.45779	1	0.29777	2.51685	0.731857
00000011_1.tif	control	IV984	d14	7.495	9.995	5.99455	8.41325	2.4187	1	0.29777	2.50521	0.720216
00000011_1.tif	control	IV984	d14	7.969	10.526	5.99455	7.87997	1.88542	1	0.29777	2.34642	0.561423
00000011_1.tif	control	IV984	d14	7.339	10.75	5.99455	8.49224	2.49769	1	0.29777	2.52873	0.743736
00000011_1.tif	control	IV984	d14	8.458	9.286	5.99455	7.61088	1.61633	1	0.29777	2.26629	0.481293
00000011_1.tif	control	IV984	d14	8.682	8.979	5.99455	7.48081	1.48626	1	0.29777	2.22756	0.442563
00000011_1.tif	control	IV984	d14	9.13	8.734	5.99455	7.13649	1.14194	1	0.29777	2.12503	0.340034
00000011_1.tif	control	IV984	d14	9.161	8.599	5.99455	7.15586	1.16131	1	0.29777	2.1308	0.345802
00000011_1.tif	control	IV984	d14	9.38	9.307	5.99455	6.71735	0.722795	1	0.29777	2.00022	0.215227
00000011_1.tif	control	IV984	d14	9.411	9.448	5.99455	6.6486	0.654045	1	0.29777	1.97975	0.194755
00000011_1.tif	control	IV984	d14	9.49	9.474	5.99455	6.56552	0.570972	1	0.29777	1.95502	0.170018
00000011_1.tif	control	IV984	d14	9.161	9.573	5.99455	6.85868	0.864126	1	0.29777	2.04231	0.257311
00000011_1.tif	control	IV984	d14	9.125	9.661	5.99455	6.87308	0.878528	1	0.29777	2.0466	0.261599
00000011_1.tif	control	IV984	d14	8.318	11.302	5.99455	7.50041	1.50585	1	0.29777	2.2334	0.448398
00000011_1.tif	control	IV984	d14	9.083	12.062	5.99455	6.78693	0.792383	1	0.29777	2.02095	0.235948
00000011_1.tif	control	IV984	d14	8.339	13.693	5.99455	7.876	1.88145	1	0.29777	2.34524	0.56024
00000011_1.tif	control	IV984	d14	8.198	14.255	5.99455	8.20069	2.20614	1	0.29777	2.44192	0.656923
00000011_1.tif	control	IV984	d14	7.188	14.625	5.99455	9.27597	3.28142	1	0.29777	2.76211	0.977109
00000011_1.tif	control	IV984	d14	7.094	14.818	5.99455	9.43531	3.44076	1	0.29777	2.80955	1.02455
00000011_1.tif	control	IV984	d14	7.312	15.297	5.99455	9.43087	3.43632	1	0.29777	2.80823	1.02323
00000011_1.tif	control	IV984	d14	8.146	15.167	5.99455	8.62594	2.63139	1	0.29777	2.56855	0.783549
00000011_1.tif	control	IV984	d14	10.01	14.271	5.99455	6.55874	0.564189	1	0.29777	1.953	0.167999
00000011_1.tif	control	IV984	d14	11.484	16.057	5.99455	6.49164	0.497093	1	0.29777	1.93302	0.14802
00000011_1.tif	control	IV984	d14	12.026	16.432	5.99455	6.44225	0.447695	1	0.29777	1.91831	0.13331
00000011_1.tif	control	IV984	d14	14.958	17.906	5.99455	6.73712	0.742565	1	0.29777	2.00611	0.221113
00000011_1.tif	control	IV984	d14	15.016	17.844	5.99455	6.6684	0.673853	1	0.29777	1.98565	0.200653
00000011_1.tif	control	IV984	d14	14.448	17.479	5.99455	6.40327	0.408724	1	0.29777	1.9067	0.121706
00000011_1.tif	control	IV984	d14	14.318	17.401	5.99455	6.35652	0.361968	1	0.29777	1.89278	0.107783
00000011_1.tif	control	IV984	d14	14.854	17.24	5.99455	6.09275	0.098195	1	0.29777	1.81424	0.0292395
00000011_1.tif	control	IV984	d14	14.047	16.979	5.99455	6.02133	0.0267834	1	0.29777	1.79297	0.0079753
00000011_1.tif	control	IV984	d14	14.078	16.875	5.99455	5.91282	-0.0817342	0	0.29777	1.76066	-0.024338
00000011_1.tif	control	IV984	d14	13.943	16.786	5.99455	5.86954	-0.125013	0	0.29777	1.74777	-0.0372253
00000011_1.tif	control	IV984	d14	13.932	16.224	5.99455	5.34387	-0.650676	0	0.29777	1.59125	-0.193752
00000011_1.tif	control	IV984	d14	13.464	16.24	5.99455	5.5409	-0.453651	0	0.29777	1.64991	-0.135084
00000011_1.tif	control	IV984	d14	12.521	16.177	5.99455	5.94999	-0.0445577	0	0.29777	1.77173	-0.013268
00000011_1.tif	control	IV984	d14	12.188	16.182	5.99455	6.14481	0.150257	1	0.29777	1.82974	0.044742
00000011_1.tif	control	IV984	d14	13.323	15.25	5.99455	4.73642	-1.25813	0	0.29777	1.41036	-0.374633
00000011_1.tif	control	IV984	d14	13.198	15.047	5.99455	4.63462	-1.35993	0	0.29777	1.38005	-0.404946
00000011_1.tif	control	IV984	d14	12.885	14.359	5.99455	4.2931	-1.70145	0	0.29777	1.27836	-0.506641
00000011_1.tif	control	IV984	d14	13.01	14.276	5.99455	4.14724	-1.84731	0	0.29777	1.23492	-0.550075
00000011_1.tif	control	IV984	d14	13.094	14.307	5.99455	4.11401	-1.88054	0	0.29777	1.22503	-0.559969
00000011_1.tif	control	IV984	d14	13.469	14.161	5.99455	3.76082	-2.23373	0	0.29777	1.11986	-0.665138
00000011_1.tif	control	IV984	d14	14.219	14.312	5.99455	3.47743	-2.51712	0	0.29777	1.03548	-0.749522
00000011_1.tif	control	IV984	d14	11.573	13.5	5.99455	4.81666	-1.17789	0	0.29777	1.43426	-0.350741
00000011_1.tif	control	IV984	d14	9.812	13.484	5.99455	6.41714	0.422585	1	0.29777	1.91083	0.125833
00000011_1.tif	control	IV984	d14	11.562	13.193	5.99455	4.6894	-1.30515	0	0.29777	1.39636	-0.388634
00000011_1.tif	control	IV984	d14	11.474	13.021	5.99455	4.70102	-1.29354	0	0.29777	1.39982	-0.385176
00000011_1.tif	control	IV984	d14	11.427	12.87	5.99455	4.68937	-1.30518	0	0.29777	1.39635	-0.388644
00000011_1.tif	control	IV984	d14	12.984	13.344	5.99455	3.5392	-2.45535	0	0.29777	1.05387	-0.731129
00000011_1.tif	control	IV984	d14	12.823	12.797	5.99455	3.38295	-2.6116	0	0.29777	1.00734	-0.777656
00000011_1.tif	control	IV984	d14	12.469	12.25	5.99455	3.50264	-2.49191	0	0.29777	1.04298	-0.742017
00000011_1.tif	control	IV984	d14	12.578	12.125	5.99455	3.36295	-2.63161	0	0.29777	1.00138	-0.783613
00000011_1.tif	control	IV984	d14	12.344	11.63	5.99455	3.49764	-2.49691	0	0.29777	1.04149	-0.743504
00000011_1.tif	control	IV984	d14	12.073	11.818	5.99455	3.79182	-2.20274	0	0.29777	1.12909	-0.655909
00000011_1.tif	control	IV984	d14	11.677	11.682	5.99455	4.16625	-1.8283	0	0.29777	1.24058	-0.544413
00000011_1.tif	control	IV984	d14	11.167	12.156	5.99455	4.74346	-1.25109	0	0.29777	1.41246	-0.372537
00000011_1.tif	control	IV984	d14	10.333	11.766	5.99455	5.51171	-0.482837	0	0.29777	1.64122	-0.143774
00000011_1.tif	control	IV984	d14	11.161	11.198	5.99455	4.65707	-1.33748	0	0.29777	1.38674	-0.398261
00000011_1.tif	control	IV984	d14	11.229	11.146	5.99455	4.58966	-1.40489	0	0.29777	1.36666	-0.418333
00000011_1.tif	control	IV984	d14	11.12	11.052	5.99455	4.70115	-1.2934	0	0.29777	1.39986	-0.385137
00000011_1.tif	control	IV984	d14	9.698	10.432	5.99455	6.17103	0.176483	1	0.29777	1.83755	0.0525515
00000011_1.tif	control	IV984	d14	9.953	10.51	5.99455	5.9083	-0.0862498	0	0.29777	1.75931	-0.0256826
00000011_1.tif	control	IV984	d14	9.802	10.089	5.99455	6.12213	0.12758	1	0.29777	1.82299	0.0379894
00000011_1.tif	control	IV984	d14	9.906	9.786	5.99455	6.08437	0.0898216	1	0.29777	1.81174	0.0267462
00000011_1.tif	control	IV984	d14	9.969	9.667	5.99455	6.05269	0.0581387	1	0.29777	1.80231	0.0173119
00000011_1.tif	control	IV984	d14	9.885	9.495	5.99455	6.1798	0.185249	1	0.29777	1.84016	0.0551617
00000011_1.tif	control	IV984	d14	10.729	10.625	5.99455	5.12413	-0.870419	0	0.29777	1.52581	-0.259185
00000011_1.tif	control	IV984	d14	10.495	10.516	5.99455	5.36988	-0.624673	0	0.29777	1.59899	-0.186009
00000011_1.tif	control	IV984	d14	10.677	10.401	5.99455	5.20646	-0.788092	0	0.29777	1.55033	-0.23467
00000011_1.tif	control	IV984	d14	10.609	10.349	5.99455	5.28198	-0.712571	0	0.29777	1.57281	-0.212182
00000011_1.tif	control	IV984	d14	10.62	10.25	5.99455	5.28847	-0.706084	0	0.29777	1.57475	-0.210251
00000011_1.tif	control	IV984	d14	10.75	9.979	5.99455	5.21868	-0.775868	0	0.29777	1.55397	-0.23103
00000011_1.tif	control	IV984	d14	10.792	9.698	5.99455	5.25256	-0.741994	0	0.29777	1.56405	-0.220944
00000011_1.tif	control	IV984	d14	10.854	9.609	5.99455	5.22011	-0.774443	0	0.29777	1.55439	-0.230606
00000011_1.tif	control	IV984	d14	11.156	10.391	5.99455	4.73583	-1.25872	0	0.29777	1.41019	-0.374808
00000011_1.tif	control	IV984	d14	11.745	10.208	5.99455	4.19781	-1.79674	0	0.29777	1.24998	-0.535016
00000011_1.tif	control	IV984	d14	11.781	10.911	5.99455	4.04912	-1.94544	0	0.29777	1.20571	-0.579292
00000011_1.tif	control	IV984	d14	12.828	10.505	5.99455	3.07523	-2.91932	0	0.29777	0.915712	-0.869285
00000011_1.tif	control	IV984	d14	13.188	10.297	5.99455	2.78859	-3.20596	0	0.29777	0.830358	-0.954639
00000011_1.tif	control	IV984	d14	12.604	10.016	5.99455	3.43352	-2.56103	0	0.29777	1.0224	-0.762598
00000011_1.tif	control	IV984	d14	13.755	10.953	5.99455	2.08072	-3.91383	0	0.29777	0.619577	-1.16542
00000011_1.tif	control	IV984	d14	14.62	11.203	5.99455	1.19818	-4.79637	0	0.29777	0.356783	-1.42821
00000011_1.tif	control	IV984	d14	14.589	11.005	5.99455	1.24836	-4.74619	0	0.29777	0.371724	-1.41327
00000011_1.tif	control	IV984	d14	13.995	10.385	5.99455	2.0068	-3.98775	0	0.29777	0.597565	-1.18743
00000011_1.tif	control	IV984	d14	13.964	10	5.99455	2.2216	-3.77295	0	0.29777	0.661525	-1.12347
00000011_1.tif	control	IV984	d14	14.151	9.964	5.99455	2.08961	-3.90494	0	0.29777	0.622225	-1.16277
00000011_1.tif	control	IV984	d14	13.906	9.255	5.99455	2.74458	-3.24997	0	0.29777	0.817253	-0.967745
00000011_1.tif	control	IV984	d14	11.667	8.917	5.99455	4.74901	-1.24555	0	0.29777	1.41411	-0.370886
00000011_1.tif	control	IV984	d14	12.042	8.948	5.99455	4.40889	-1.58566	0	0.29777	1.31284	-0.472161
00000011_1.tif	control	IV984	d14	12.661	8.979	5.99455	3.87384	-2.12071	0	0.29777	1.15351	-0.631483
00000011_1.tif	control	IV984	d14	11.854	7.646	5.99455	5.33998	-0.654571	0	0.29777	1.59009	-0.194912
00000011_1.tif	control	IV984	d14	14.479	8.089	5.99455	3.40898	-2.58557	0	0.29777	1.01509	-0.769905
00000011_1.tif	control	IV984	d14	14.396	7.349	5.99455	4.12768	-1.86687	0	0.29777	1.2291	-0.555899
00000011_1.tif	control	IV984	d14	14.365	7	5.99455	4.46692	-1.52763	0	0.29777	1.33012	-0.454882
00000011_1.tif	control	IV984	d14	14.417	7.052	5.99455	4.40095	-1.5936	0	0.29777	1.31047	-0.474526
00000011_1.tif	control	IV984	d14	14.635	6.729	5.99455	4.64807	-1.34649	0	0.29777	1.38405	-0.400943
00000011_1.tif	control	IV984	d14	13.786	6.651	5.99455	5.00413	-0.990417	0	0.29777	1.49008	-0.294917
00000011_1.tif	control	IV984	d14	13.312	6.302	5.99455	5.52323	-0.471316	0	0.29777	1.64465	-0.140344
00000011_1.tif	control	IV984	d14	13.552	6.307	5.99455	5.41402	-0.580528	0	0.29777	1.61213	-0.172864
00000011_1.tif	control	IV984	d14	14.328	6.458	5.99455	4.99348	-1.00107	0	0.29777	1.48691	-0.298088
00000011_1.tif	control	IV984	d14	14.25	6.255	5.99455	5.21053	-0.784024	0	0.29777	1.55154	-0.233459
00000011_1.tif	control	IV984	d14	14.349	6.219	5.99455	5.21613	-0.778423	0	0.29777	1.55321	-0.231791
00000011_1.tif	control	IV984	d14	14.359	5.958	5.99455	5.46438	-0.530172	0	0.29777	1.62713	-0.157869
00000011_1.tif	control	IV984	d14	14.745	4.651	5.99455	6.66	0.665454	1	0.29777	1.98315	0.198152
00000011_1.tif	control	IV984	d14	14.719	4.448	5.99455	6.86454	0.869994	1	0.29777	2.04406	0.259058
00000011_1.tif	control	IV984	d14	16.146	5.479	5.99455	5.75436	-0.240195	0	0.29777	1.71347	-0.0715229
00000011_1.tif	control	IV984	d14	16.776	5.609	5.99455	5.69614	-0.298413	0	0.29777	1.69614	-0.0888584
00000011_1.tif	control	IV984	d14	17.286	5.516	5.99455	5.89375	-0.100801	0	0.29777	1.75498	-0.0300155
00000011_1.tif	control	IV984	d14	17.286	5.432	5.99455	5.97514	-0.0194117	0	0.29777	1.77922	-0.00578021
00000011_1.tif	control	IV984	d14	16.792	7.125	5.99455	4.21313	-1.78142	0	0.29777	1.25454	-0.530453
00000011_1.tif	control	IV984	d14	16.849	7.516	5.99455	3.84867	-2.14589	0	0.29777	1.14602	-0.63898
00000011_1.tif	control	IV984	d14	16.922	7.599	5.99455	3.78939	-2.20517	0	0.29777	1.12837	-0.656632
00000011_1.tif	control	IV984	d14	18.943	7.104	5.99455	5.17108	-0.823475	0	0.29777	1.53979	-0.245206
00000011_1.tif	control	IV984	d14	18.891	7.24	5.99455	5.03146	-0.963091	0	0.29777	1.49822	-0.28678
00000011_1.tif	control	IV984	d14	19.094	7.802	5.99455	4.73733	-1.25722	0	0.29777	1.41063	-0.374364
00000011_1.tif	control	IV984	d14	19.339	7.771	5.99455	4.9316	-1.06295	0	0.29777	1.46848	-0.316516
00000011_1.tif	control	IV984	d14	18.776	8.094	5.99455	4.30658	-1.68797	0	0.29777	1.28237	-0.502626
00000011_1.tif	control	IV984	d14	18.75	8.198	5.99455	4.21347	-1.78108	0	0.29777	1.25464	-0.530353
00000011_1.tif	control	IV984	d14	18.49	8.708	5.99455	3.67013	-2.32442	0	0.29777	1.09285	-0.692143
00000011_1.tif	control	IV984	d14	18.229	9.198	5.99455	3.14922	-2.84533	0	0.29777	0.937744	-0.847254
00000011_1.tif	control	IV984	d14	18.151	9.276	5.99455	3.03934	-2.95521	0	0.29777	0.905025	-0.879973
00000011_1.tif	control	IV984	d14	15.651	10.099	5.99455	1.13733	-4.85722	0	0.29777	0.338662	-1.44634
00000011_1.tif	control	IV984	d14	15.339	11.021	5.99455	0.52024	-5.47431	0	0.29777	0.154912	-1.63009
00000011_1.tif	control	IV984	d14	15.828	11.052	5.99455	0.17229	-5.82226	0	0.29777	0.0513029	-1.73369
00000011_1.tif	control	IV984	d14	16.422	10.167	5.99455	1.2174	-4.77715	0	0.29777	0.362505	-1.42249
00000011_1.tif	control	IV984	d14	16.438	10.083	5.99455	1.29857	-4.69598	0	0.29777	0.386675	-1.39832
00000011_1.tif	control	IV984	d14	17.526	10.073	5.99455	2.05963	-3.93492	0	0.29777	0.613295	-1.1717
00000011_1.tif	control	IV984	d14	17.708	10.12	5.99455	2.18882	-3.80573	0	0.29777	0.651764	-1.13323
00000011_1.tif	control	IV984	d14	18.464	10.484	5.99455	2.74753	-3.24702	0	0.29777	0.818132	-0.966866
00000011_1.tif	control	IV984	d14	18.812	10.198	5.99455	3.16492	-2.82963	0	0.29777	0.942418	-0.842579
00000011_1.tif	control	IV984	d14	19.047	10.302	5.99455	3.35805	-2.6365	0	0.29777	0.999928	-0.78507
00000011_1.tif	control	IV984	d14	17.401	11.172	5.99455	1.58385	-4.4107	0	0.29777	0.471624	-1.31337
00000011_1.tif	control	IV984	d14	16.286	11.38	5.99455	0.493315	-5.50124	0	0.29777	0.146895	-1.6381
00000011_1.tif	control	IV984	d14	16.125	11.828	5.99455	0.677543	-5.31701	0	0.29777	0.201752	-1.58325
00000011_1.tif	control	IV984	d14	16.37	12.625	5.99455	1.50582	-4.48873	0	0.29777	0.448389	-1.33661
00000011_1.tif	control	IV984	d14	16.474	12.828	5.99455	1.73296	-4.26159	0	0.29777	0.516024	-1.26897
00000011_1.tif	control	IV984	d14	18.198	12.729	5.99455	2.81592	-3.17863	0	0.29777	0.838498	-0.9465
00000011_1.tif	control	IV984	d14	15.135	14.214	5.99455	3.06702	-2.92753	0	0.29777	0.913265	-0.871732
00000011_1.tif	control	IV984	d14	15.193	14.365	5.99455	3.20258	-2.79197	0	0.29777	0.953632	-0.831366
00000011_1.tif	control	IV984	d14	15.521	14.656	5.99455	3.44483	-2.54972	0	0.29777	1.02577	-0.759231
00000011_1.tif	control	IV984	d14	15.891	14.672	5.99455	3.44877	-2.54578	0	0.29777	1.02694	-0.758056
00000011_1.tif	control	IV984	d14	15.969	14.776	5.99455	3.55521	-2.43934	0	0.29777	1.05863	-0.726363
00000011_1.tif	control	IV984	d14	16.448	15.854	5.99455	4.67267	-1.32189	0	0.29777	1.39138	-0.393618
00000011_1.tif	control	IV984	d14	16.63	15.797	5.99455	4.64453	-1.35002	0	0.29777	1.383	-0.401995
00000011_1.tif	control	IV984	d14	16.432	16	5.99455	4.81531	-1.17924	0	0.29777	1.43385	-0.351144
00000011_1.tif	control	IV984	d14	18.047	15.562	5.99455	4.87716	-1.11739	0	0.29777	1.45227	-0.332726
00000011_1.tif	control	IV984	d14	18.349	15.552	5.99455	5.01374	-0.980815	0	0.29777	1.49294	-0.292057
00000011_1.tif	control	IV984	d14	18.151	14.953	5.99455	4.39867	-1.59588	0	0.29777	1.30979	-0.475204
00000011_1.tif	control	IV984	d14	19.224	14.667	5.99455	4.84305	-1.15151	0	0.29777	1.44211	-0.342884
00000011_1.tif	control	IV984	d14	19.422	15.354	5.99455	5.4814	-0.513154	0	0.29777	1.6322	-0.152802
00000011_1.tif	control	IV984	d14	15.906	16.896	5.99455	5.67268	-0.321868	0	0.29777	1.68915	-0.0958427
00000011_1.tif	control	IV984	d14	16.635	17.167	5.99455	5.99889	0.0043439	1	0.29777	1.78629	0.00129348
00000011_1.tif	control	IV984	d14	18.672	16.958	5.99455	6.405	0.410453	1	0.29777	1.90722	0.122221
00000011_1.tif	control	IV984	d14	18.865	17.021	5.99455	6.549	0.55445	1	0.29777	1.9501	0.165099
00000011_1.tif	control	IV984	d14	17.354	18.859	5.99455	7.78797	1.79342	1	0.29777	2.31902	0.534027
00000011_1.tif	control	IV984	d14	15.729	18.198	5.99455	6.97457	0.980017	1	0.29777	2.07682	0.29182
00000011_1.tif	control	IV984	d14	15.307	18.458	5.99455	7.25203	1.25747	1	0.29777	2.15944	0.374438
00000011_1.tif	control	IV984	d14	19.542	19.745	5.99455	9.29923	3.30468	1	0.29777	2.76903	0.984033
00000011_1.tif	control	IV984	d14	19.682	19.609	5.99455	9.23248	3.23793	1	0.29777	2.74916	0.964159
00000011_1.tif	control	IV984	d14	19.745	19.292	5.99455	8.97296	2.97841	1	0.29777	2.67188	0.88688
00000011_1.tif	control	IV984	d14	20.531	15.938	5.99455	6.6659	0.671345	1	0.29777	1.9849	0.199906
00000011_1.tif	control	IV984	d14	22.125	16.385	5.99455	8.14949	2.15494	1	0.29777	2.42667	0.641676
00000011_1.tif	control	IV984	d14	22.245	16.5	5.99455	8.3152	2.32065	1	0.29777	2.47602	0.691019
00000011_1.tif	control	IV984	d14	22.443	16.516	5.99455	8.47914	2.48459	1	0.29777	2.52483	0.739837
00000011_1.tif	control	IV984	d14	20.771	14.443	5.99455	5.90713	-0.0874221	0	0.29777	1.75897	-0.0260317
00000011_1.tif	control	IV984	d14	20.823	14.391	5.99455	5.92283	-0.0717209	0	0.29777	1.76364	-0.0213563
00000011_1.tif	control	IV984	d14	20.844	13.865	5.99455	5.67764	-0.316914	0	0.29777	1.69063	-0.0943676
00000011_1.tif	control	IV984	d14	20.62	12.938	5.99455	5.09873	-0.895826	0	0.29777	1.51825	-0.26675
00000011_1.tif	control	IV984	d14	20.948	12.943	5.99455	5.41035	-0.584203	0	0.29777	1.61104	-0.173958
00000011_1.tif	control	IV984	d14	21.01	12.812	5.99455	5.42942	-0.56513	0	0.29777	1.61672	-0.168279
00000011_1.tif	control	IV984	d14	21.083	12.807	5.99455	5.49783	-0.496723	0	0.29777	1.63709	-0.147909
00000011_1.tif	control	IV984	d14	21.802	12.448	5.99455	6.1079	0.113348	1	0.29777	1.81875	0.0337517
00000011_1.tif	control	IV984	d14	21.938	12.354	5.99455	6.22345	0.228897	1	0.29777	1.85316	0.0681586
00000011_1.tif	control	IV984	d14	22.234	12.224	5.99455	6.49346	0.498912	1	0.29777	1.93356	0.148561
00000011_1.tif	control	IV984	d14	23.042	12.24	5.99455	7.2951	1.30055	1	0.29777	2.17226	0.387263
00000011_1.tif	control	IV984	d14	21.875	10.969	5.99455	6.06237	0.0678145	1	0.29777	1.80519	0.0201931
00000011_1.tif	control	IV984	d14	22.573	11.526	5.99455	6.76175	0.767197	1	0.29777	2.01345	0.228448
00000011_1.tif	control	IV984	d14	22.781	11.177	5.99455	6.96316	0.968608	1	0.29777	2.07342	0.288422
00000011_1.tif	control	IV984	d14	23.651	11.979	5.99455	7.8693	1.87475	1	0.29777	2.34324	0.558245
00000011_1.tif	control	IV984	d14	23.573	11.365	5.99455	7.75628	1.76173	1	0.29777	2.30959	0.524591
00000011_1.tif	control	IV984	d14	23.859	11.229	5.99455	8.041	2.04645	1	0.29777	2.39437	0.609372
00000011_1.tif	control	IV984	d14	24.339	11.182	5.99455	8.5211	2.52655	1	0.29777	2.53733	0.752332
00000011_1.tif	control	IV984	d14	20.177	8.656	5.99455	5.0592	-0.935351	0	0.29777	1.50648	-0.278519
00000011_1.tif	control	IV984	d14	20.203	8.536	5.99455	5.1433	-0.851248	0	0.29777	1.53152	-0.253476
00000011_1.tif	control	IV984	d14	20.391	8.589	5.99455	5.27784	-0.716715	0	0.29777	1.57158	-0.213416
00000011_1.tif	control	IV984	d14	21.297	9.37	5.99455	5.78418	-0.210369	0	0.29777	1.72236	-0.0626416
00000011_1.tif	control	IV984	d14	21.417	9.229	5.99455	5.94381	-0.0507451	0	0.29777	1.76989	-0.0151104
00000011_1.tif	control	IV984	d14	21.646	9.583	5.99455	6.05462	0.0600726	1	0.29777	1.80289	0.0178878
00000011_1.tif	control	IV984	d14	22.318	9.255	5.99455	6.79168	0.797132	1	0.29777	2.02236	0.237362
00000011_1.tif	control	IV984	d14	22.109	9.005	5.99455	6.67088	0.676329	1	0.29777	1.98639	0.201391
00000011_1.tif	control	IV984	d14	21.266	7.682	5.99455	6.49819	0.503639	1	0.29777	1.93497	0.149969
00000011_1.tif	control	IV984	d14	23.266	7.198	5.99455	8.46649	2.47193	1	0.29777	2.52107	0.736068
00000011_1.tif	control	IV984	d14	24.188	8.604	5.99455	8.77048	2.77593	1	0.29777	2.61159	0.826588
00000011_1.tif	control	IV984	d14	19.365	6.839	5.99455	5.63999	-0.354566	0	0.29777	1.67942	-0.105579
00000011_1.tif	control	IV984	d14	19.589	6.786	5.99455	5.82377	-0.170782	0	0.29777	1.73414	-0.0508537
00000011_1.tif	control	IV984	d14	19.646	6.599	5.99455	6.00368	0.00913212	1	0.29777	1.78772	0.00271927
00000011_1.tif	control	IV984	d14	19.62	6.24	5.99455	6.26861	0.274058	1	0.29777	1.8666	0.0816063
00000011_1.tif	control	IV984	d14	19.542	6.115	5.99455	6.32219	0.327637	1	0.29777	1.88256	0.0975604
00000011_1.tif	control	IV984	d14	19.677	5.62	5.99455	6.80417	0.809617	1	0.29777	2.02608	0.24108
00000011_1.tif	control	IV984	d14	20.385	5.74	5.99455	7.13665	1.1421	1	0.29777	2.12508	0.340082
00000011_1.tif	control	IV984	d14	20.557	5.781	5.99455	7.21695	1.2224	1	0.29777	2.14899	0.363994
00000011_1.tif	control	IV984	d14	21	2.615	5.99455	10.0483	4.05373	1	0.29777	2.99208	1.20708
00000011_1.tif	control	IV984	d14	19.807	2.073	5.99455	9.98263	3.98808	1	0.29777	2.97253	1.18753
00000012_6.tif	control	IV986	d34	13.104	3.37	5.43247	7.34721	1.91473	1	0.29777	2.18778	0.57015
00000012_6.tif	control	IV986	d34	10.214	5.802	5.43247	6.79213	1.35965	1	0.29777	2.02249	0.404864
00000012_6.tif	control	IV986	d34	11.76	4.292	5.43247	7.02114	1.58867	1	0.29777	2.09068	0.473057
00000012_6.tif	control	IV986	d34	11.943	4.24	5.43247	6.97917	1.5467	1	0.29777	2.07819	0.46056
00000012_6.tif	control	IV986	d34	11.979	5.906	5.43247	5.53978	0.107309	1	0.29777	1.64958	0.0319533
00000012_6.tif	control	IV986	d34	11.964	5.995	5.43247	5.47651	0.0440366	1	0.29777	1.63074	0.0131128
00000012_6.tif	control	IV986	d34	12.083	5.932	5.43247	5.45856	0.0260818	1	0.29777	1.62539	0.00776639
00000012_6.tif	control	IV986	d34	11.875	6.328	5.43247	5.26749	-0.164983	0	0.29777	1.5685	-0.0491269
00000012_6.tif	control	IV986	d34	12.172	6.151	5.43247	5.22825	-0.204228	0	0.29777	1.55681	-0.0608131
00000012_6.tif	control	IV986	d34	12.276	6.349	5.43247	5.00671	-0.425762	0	0.29777	1.49085	-0.126779
00000012_6.tif	control	IV986	d34	12	6.875	5.43247	4.77101	-0.661468	0	0.29777	1.42066	-0.196965
00000012_6.tif	control	IV986	d34	12.589	6.932	5.43247	4.3516	-1.08087	0	0.29777	1.29578	-0.321852
00000012_6.tif	control	IV986	d34	12.958	6.953	5.43247	4.12284	-1.30964	0	0.29777	1.22766	-0.389971
00000012_6.tif	control	IV986	d34	12.635	7.391	5.43247	3.96422	-1.46826	0	0.29777	1.18043	-0.437203
00000012_6.tif	control	IV986	d34	12.76	7.401	5.43247	3.87664	-1.55583	0	0.29777	1.15435	-0.463281
00000012_6.tif	control	IV986	d34	12.87	7.375	5.43247	3.82886	-1.60361	0	0.29777	1.14012	-0.477508
00000012_6.tif	control	IV986	d34	13.104	7.276	5.43247	3.7728	-1.65967	0	0.29777	1.12343	-0.494201
00000012_6.tif	control	IV986	d34	13.562	7.135	5.43247	3.66402	-1.76845	0	0.29777	1.09104	-0.526592
00000012_6.tif	control	IV986	d34	13.49	6.62	5.43247	4.16005	-1.27242	0	0.29777	1.23874	-0.378889
00000012_6.tif	control	IV986	d34	13.495	6.161	5.43247	4.58037	-0.852108	0	0.29777	1.3639	-0.253732
00000012_6.tif	control	IV986	d34	13.474	6.068	5.43247	4.67451	-0.75796	0	0.29777	1.39193	-0.225698
00000012_6.tif	control	IV986	d34	12.958	7.641	5.43247	3.56552	-1.86696	0	0.29777	1.0617	-0.555923
00000012_6.tif	control	IV986	d34	12.682	7.786	5.43247	3.63951	-1.79296	0	0.29777	1.08374	-0.53389
00000012_6.tif	control	IV986	d34	12.25	7.635	5.43247	4.05295	-1.37953	0	0.29777	1.20685	-0.410782
00000012_6.tif	control	IV986	d34	11.427	7.641	5.43247	4.68306	-0.749412	0	0.29777	1.39448	-0.223152
00000012_6.tif	control	IV986	d34	11.229	8.109	5.43247	4.59259	-0.839885	0	0.29777	1.36754	-0.250093
00000012_6.tif	control	IV986	d34	12.406	8.536	5.43247	3.36732	-2.06516	0	0.29777	1.00269	-0.614942
00000012_6.tif	control	IV986	d34	12.479	8.526	5.43247	3.31261	-2.11986	0	0.29777	0.986397	-0.631231
00000012_6.tif	control	IV986	d34	11.911	9.24	5.43247	3.49407	-1.93841	0	0.29777	1.04043	-0.5772
00000012_6.tif	control	IV986	d34	13.182	10.734	5.43247	2.04665	-3.38583	0	0.29777	0.609431	-1.0082
00000012_6.tif	control	IV986	d34	13.099	10.823	5.43247	2.14396	-3.28852	0	0.29777	0.638407	-0.979221
00000012_6.tif	control	IV986	d34	13.51	10.484	5.43247	1.69457	-3.7379	0	0.29777	0.504593	-1.11303
00000012_6.tif	control	IV986	d34	10.797	12.766	5.43247	4.99588	-0.43659	0	0.29777	1.48762	-0.130004
00000012_6.tif	control	IV986	d34	10.771	12.844	5.43247	5.0559	-0.376576	0	0.29777	1.50549	-0.112133
00000012_6.tif	control	IV986	d34	10.906	12.688	5.43247	4.86302	-0.569457	0	0.29777	1.44806	-0.169567
00000012_6.tif	control	IV986	d34	9.547	13.557	5.43247	6.47207	1.03959	1	0.29777	1.92719	0.309559
00000012_6.tif	control	IV986	d34	8.026	13.146	5.43247	7.68047	2.24799	1	0.29777	2.28701	0.669384
00000012_6.tif	control	IV986	d34	8.062	13.24	5.43247	7.68096	2.24848	1	0.29777	2.28716	0.669531
00000012_6.tif	control	IV986	d34	9.74	13.703	5.43247	6.37822	0.945741	1	0.29777	1.89924	0.281613
00000012_6.tif	control	IV986	d34	10.734	13.385	5.43247	5.36811	-0.0643618	0	0.29777	1.59846	-0.019165
00000012_6.tif	control	IV986	d34	11.057	13.26	5.43247	5.03052	-0.401956	0	0.29777	1.49794	-0.119691
00000012_6.tif	control	IV986	d34	11.375	13.375	5.43247	4.84137	-0.591103	0	0.29777	1.44162	-0.176013
00000012_6.tif	control	IV986	d34	11.672	13.51	5.43247	4.69806	-0.734415	0	0.29777	1.39894	-0.218687
00000012_6.tif	control	IV986	d34	11.75	13.438	5.43247	4.59194	-0.840532	0	0.29777	1.36734	-0.250285
00000012_6.tif	control	IV986	d34	11.188	14.156	5.43247	5.49047	0.0579942	1	0.29777	1.6349	0.0172689
00000012_6.tif	control	IV986	d34	11.542	14.38	5.43247	5.39962	-0.0328561	0	0.29777	1.60784	-0.00978357
00000012_6.tif	control	IV986	d34	10.25	14.318	5.43247	6.30848	0.876	1	0.29777	1.87847	0.260847
00000012_6.tif	control	IV986	d34	9.76	14.516	5.43247	6.81742	1.38495	1	0.29777	2.03002	0.412396
00000012_6.tif	control	IV986	d34	13.552	14.432	5.43247	4.34675	-1.08572	0	0.29777	1.29433	-0.323296
00000012_6.tif	control	IV986	d34	14.125	14.604	5.43247	4.32936	-1.10312	0	0.29777	1.28915	-0.328475
00000012_6.tif	control	IV986	d34	14.255	14.578	5.43247	4.27348	-1.159	0	0.29777	1.27251	-0.345115
00000012_6.tif	control	IV986	d34	14.526	14.906	5.43247	4.5457	-0.886779	0	0.29777	1.35357	-0.264056
00000012_6.tif	control	IV986	d34	14.026	13.745	5.43247	3.53566	-1.89682	0	0.29777	1.05281	-0.564815
00000012_6.tif	control	IV986	d34	14.49	13.583	5.43247	3.25115	-2.18133	0	0.29777	0.968094	-0.649534
00000012_6.tif	control	IV986	d34	14.656	13.969	5.43247	3.5998	-1.83267	0	0.29777	1.07191	-0.545715
00000012_6.tif	control	IV986	d34	15.26	14.234	5.43247	3.82342	-1.60905	0	0.29777	1.1385	-0.479127
00000012_6.tif	control	IV986	d34	15.719	15.177	5.43247	4.79385	-0.638623	0	0.29777	1.42747	-0.190163
00000012_6.tif	control	IV986	d34	15.729	13.995	5.43247	3.62239	-1.81008	0	0.29777	1.07864	-0.538988
00000012_6.tif	control	IV986	d34	15.734	13.901	5.43247	3.53016	-1.90231	0	0.29777	1.05118	-0.566451
00000012_6.tif	control	IV986	d34	15.891	14.083	5.43247	3.7359	-1.69658	0	0.29777	1.11244	-0.50519
00000012_6.tif	control	IV986	d34	16.036	13.995	5.43247	3.67953	-1.75294	0	0.29777	1.09565	-0.521974
00000012_6.tif	control	IV986	d34	16.109	13.703	5.43247	3.4144	-2.01808	0	0.29777	1.0167	-0.600923
00000012_6.tif	control	IV986	d34	16.172	13.604	5.43247	3.3368	-2.09568	0	0.29777	0.993598	-0.62403
00000012_6.tif	control	IV986	d34	16.604	14.901	5.43247	4.7035	-0.728976	0	0.29777	1.40056	-0.217067
00000012_6.tif	control	IV986	d34	15.12	12.568	5.43247	2.1586	-3.27388	0	0.29777	0.642765	-0.974863
00000012_6.tif	control	IV986	d34	15.068	12.312	5.43247	1.90579	-3.52669	0	0.29777	0.567486	-1.05014
00000012_6.tif	control	IV986	d34	15.297	12.641	5.43247	2.23198	-3.20049	0	0.29777	0.664617	-0.953011
00000012_6.tif	control	IV986	d34	15.495	12.526	5.43247	2.13506	-3.29741	0	0.29777	0.635757	-0.981871
00000012_6.tif	control	IV986	d34	16.026	12.036	5.43247	1.82153	-3.61095	0	0.29777	0.542396	-1.07523
00000012_6.tif	control	IV986	d34	17	12.427	5.43247	2.70064	-2.73183	0	0.29777	0.80417	-0.813458
00000012_6.tif	control	IV986	d34	17.354	12	5.43247	2.67427	-2.7582	0	0.29777	0.796317	-0.821311
00000012_6.tif	control	IV986	d34	17.417	11.958	5.43247	2.70093	-2.73155	0	0.29777	0.804255	-0.813373
00000012_6.tif	control	IV986	d34	18.042	11.26	5.43247	2.96323	-2.46925	0	0.29777	0.88236	-0.735268
00000012_6.tif	control	IV986	d34	16.87	11.073	5.43247	1.79364	-3.63884	0	0.29777	0.534091	-1.08354
00000012_6.tif	control	IV986	d34	16.167	11.052	5.43247	1.15766	-4.27481	0	0.29777	0.344716	-1.27291
00000012_6.tif	control	IV986	d34	16.234	11.062	5.43247	1.21933	-4.21315	0	0.29777	0.363079	-1.25455
00000012_6.tif	control	IV986	d34	16.63	10.672	5.43247	1.45067	-3.9818	0	0.29777	0.431967	-1.18566
00000012_6.tif	control	IV986	d34	15.901	10.047	5.43247	0.78721	-4.64526	0	0.29777	0.234408	-1.38322
00000012_6.tif	control	IV986	d34	15.833	9.927	5.43247	0.794453	-4.63802	0	0.29777	0.236564	-1.38106
00000012_6.tif	control	IV986	d34	15.604	9.672	5.43247	0.840787	-4.59169	0	0.29777	0.250361	-1.36727
00000012_6.tif	control	IV986	d34	16.224	9.849	5.43247	1.16545	-4.26702	0	0.29777	0.347037	-1.27059
00000012_6.tif	control	IV986	d34	16.474	10.391	5.43247	1.27116	-4.16132	0	0.29777	0.378513	-1.23912
00000012_6.tif	control	IV986	d34	16.755	10.276	5.43247	1.55786	-3.87461	0	0.29777	0.463884	-1.15374
00000012_6.tif	control	IV986	d34	17.193	9.339	5.43247	2.26037	-3.1721	0	0.29777	0.673071	-0.944557
00000012_6.tif	control	IV986	d34	17.302	9.255	5.43247	2.39628	-3.0362	0	0.29777	0.713539	-0.904089
00000012_6.tif	control	IV986	d34	14.042	9.359	5.43247	1.56672	-3.86575	0	0.29777	0.466523	-1.1511
00000012_6.tif	control	IV986	d34	13.667	8.823	5.43247	2.20931	-3.22317	0	0.29777	0.657866	-0.959763
00000012_6.tif	control	IV986	d34	14.031	8.385	5.43247	2.34057	-3.09191	0	0.29777	0.696951	-0.920677
00000012_6.tif	control	IV986	d34	14.266	8.385	5.43247	2.23218	-3.20029	0	0.29777	0.664677	-0.952951
00000012_6.tif	control	IV986	d34	14.427	8.214	5.43247	2.33002	-3.10246	0	0.29777	0.69381	-0.923818
00000012_6.tif	control	IV986	d34	15.276	8.594	5.43247	1.81847	-3.61401	0	0.29777	0.541485	-1.07614
00000012_6.tif	control	IV986	d34	18.057	10.125	5.43247	2.86829	-2.56418	0	0.29777	0.854092	-0.763536
00000012_6.tif	control	IV986	d34	15.026	7.802	5.43247	2.615	-2.81748	0	0.29777	0.778668	-0.83896
00000012_6.tif	control	IV986	d34	14.276	7.115	5.43247	3.42388	-2.0086	0	0.29777	1.01953	-0.5981
00000012_6.tif	control	IV986	d34	14.401	6.995	5.43247	3.50888	-1.92359	0	0.29777	1.04484	-0.572788
00000012_6.tif	control	IV986	d34	14.958	7.182	5.43247	3.23828	-2.19419	0	0.29777	0.964263	-0.653365
00000012_6.tif	control	IV986	d34	15.245	7.286	5.43247	3.12528	-2.30719	0	0.29777	0.930615	-0.687013
00000012_6.tif	control	IV986	d34	15.427	7.281	5.43247	3.13801	-2.29447	0	0.29777	0.934404	-0.683224
00000012_6.tif	control	IV986	d34	15.193	6.781	5.43247	3.63001	-1.80246	0	0.29777	1.08091	-0.536719
00000012_6.tif	control	IV986	d34	15.182	6.703	5.43247	3.70806	-1.72442	0	0.29777	1.10415	-0.513479
00000012_6.tif	control	IV986	d34	15.021	6.661	5.43247	3.75441	-1.67806	0	0.29777	1.11795	-0.499676
00000012_6.tif	control	IV986	d34	15.547	6.078	5.43247	4.34663	-1.08584	0	0.29777	1.2943	-0.323331
00000012_6.tif	control	IV986	d34	16.125	6.339	5.43247	4.17508	-1.2574	0	0.29777	1.24321	-0.374415
00000012_6.tif	control	IV986	d34	17.182	7.036	5.43247	3.91242	-1.52005	0	0.29777	1.165	-0.452625
00000012_6.tif	control	IV986	d34	17.297	6.969	5.43247	4.02892	-1.40355	0	0.29777	1.19969	-0.417936
00000012_6.tif	control	IV986	d34	17.531	7.25	5.43247	3.92575	-1.50673	0	0.29777	1.16897	-0.448658
00000012_6.tif	control	IV986	d34	17.625	7.229	5.43247	3.9989	-1.43357	0	0.29777	1.19075	-0.426875
00000012_6.tif	control	IV986	d34	17.495	6.495	5.43247	4.53744	-0.895039	0	0.29777	1.35111	-0.266516
00000012_6.tif	control	IV986	d34	14.271	4.464	5.43247	6.01959	0.587113	1	0.29777	1.79245	0.174825
00000012_6.tif	control	IV986	d34	14.396	4.422	5.43247	6.04313	0.610651	1	0.29777	1.79946	0.181834
00000012_6.tif	control	IV986	d34	15.911	3.844	5.43247	6.60506	1.17258	1	0.29777	1.96679	0.349159
00000012_6.tif	control	IV986	d34	16.974	4.922	5.43247	5.76763	0.335156	1	0.29777	1.71743	0.0997993
00000012_6.tif	control	IV986	d34	17.333	5.13	5.43247	5.69437	0.261896	1	0.29777	1.69561	0.0779848
00000012_6.tif	control	IV986	d34	16.307	2.797	5.43247	7.69362	2.26115	1	0.29777	2.29093	0.673302
00000012_6.tif	control	IV986	d34	16.276	2.693	5.43247	7.79223	2.35976	1	0.29777	2.32029	0.702664
00000012_6.tif	control	IV986	d34	17.073	2.526	5.43247	8.10371	2.67124	1	0.29777	2.41304	0.795414
00000012_6.tif	control	IV986	d34	15.396	1.672	5.43247	8.74113	3.30866	1	0.29777	2.60285	0.985219
00000012_6.tif	control	IV986	d34	15.828	1.703	5.43247	8.7304	3.29793	1	0.29777	2.59965	0.982023
00000012_6.tif	control	IV986	d34	18.26	9.318	5.43247	3.24652	-2.18595	0	0.29777	0.966717	-0.650911
00000012_6.tif	control	IV986	d34	18.125	9.589	5.43247	3.03542	-2.39706	0	0.29777	0.903857	-0.713771
00000012_6.tif	control	IV986	d34	18.391	9.651	5.43247	3.27734	-2.15514	0	0.29777	0.975893	-0.641735
00000012_6.tif	control	IV986	d34	19.198	10.422	5.43247	3.99502	-1.43746	0	0.29777	1.1896	-0.428032
00000012_6.tif	control	IV986	d34	19.771	10.365	5.43247	4.56823	-0.864243	0	0.29777	1.36028	-0.257346
00000012_6.tif	control	IV986	d34	20.089	10.339	5.43247	4.88653	-0.545944	0	0.29777	1.45506	-0.162566
00000012_6.tif	control	IV986	d34	20.036	10.646	5.43247	4.83871	-0.593765	0	0.29777	1.44082	-0.176805
00000012_6.tif	control	IV986	d34	18.51	11.151	5.43247	3.38878	-2.04369	0	0.29777	1.00908	-0.60855
00000012_6.tif	control	IV986	d34	18.505	11.292	5.43247	3.41751	-2.01497	0	0.29777	1.01763	-0.599996
00000012_6.tif	control	IV986	d34	18.354	11.661	5.43247	3.38988	-2.04259	0	0.29777	1.00941	-0.608223
00000012_6.tif	control	IV986	d34	18.656	11.328	5.43247	3.57269	-1.85979	0	0.29777	1.06384	-0.553789
00000012_6.tif	control	IV986	d34	19.339	11.646	5.43247	4.31645	-1.11603	0	0.29777	1.28531	-0.332319
00000012_6.tif	control	IV986	d34	19.292	11.781	5.43247	4.3124	-1.12007	0	0.29777	1.2841	-0.333524
00000012_6.tif	control	IV986	d34	19.422	11.75	5.43247	4.42638	-1.00609	0	0.29777	1.31804	-0.299583
00000012_6.tif	control	IV986	d34	19.385	11.906	5.43247	4.44119	-0.991287	0	0.29777	1.32245	-0.295176
00000012_6.tif	control	IV986	d34	19.479	12.151	5.43247	4.61647	-0.816007	0	0.29777	1.37465	-0.242982
00000012_6.tif	control	IV986	d34	19.37	12.172	5.43247	4.52383	-0.908648	0	0.29777	1.34706	-0.270568
00000012_6.tif	control	IV986	d34	19.036	12.448	5.43247	4.34065	-1.09182	0	0.29777	1.29252	-0.325112
00000012_6.tif	control	IV986	d34	18.276	13.438	5.43247	4.31347	-1.119	0	0.29777	1.28442	-0.333205
00000012_6.tif	control	IV986	d34	18.146	13.573	5.43247	4.31966	-1.11281	0	0.29777	1.28627	-0.331362
00000012_6.tif	control	IV986	d34	18.464	13.526	5.43247	4.50969	-0.92278	0	0.29777	1.34285	-0.274776
00000012_6.tif	control	IV986	d34	18.458	13.615	5.43247	4.56735	-0.86513	0	0.29777	1.36002	-0.25761
0000012_10.tif	control	LX704	d23	6.047	10.906	5.4844	7.46993	1.98553	1	0.29777	2.22432	0.59123
0000012_10.tif	control	LX704	d23	6.135	10.901	5.4844	7.38236	1.89795	1	0.29777	2.19825	0.565154
0000012_10.tif	control	LX704	d23	5.891	11.604	5.4844	7.619	2.1346	1	0.29777	2.26871	0.635619
0000012_10.tif	control	LX704	d23	5.792	11.802	5.4844	7.72755	2.24315	1	0.29777	2.30103	0.667942
0000012_10.tif	control	LX704	d23	4.328	14.448	5.4844	9.69287	4.20847	1	0.29777	2.88625	1.25315
0000012_10.tif	control	LX704	d23	6.557	14.865	5.4844	7.79648	2.31207	1	0.29777	2.32156	0.688466
0000012_10.tif	control	LX704	d23	6.698	14.766	5.4844	7.62595	2.14154	1	0.29777	2.27078	0.637688
0000012_10.tif	control	LX704	d23	6.974	13.927	5.4844	7.02914	1.54473	1	0.29777	2.09307	0.459975
0000012_10.tif	control	LX704	d23	8.849	16.641	5.4844	7.06444	1.58003	1	0.29777	2.10358	0.470487
0000012_10.tif	control	LX704	d23	8.995	16.708	5.4844	7.02029	1.53589	1	0.29777	2.09043	0.457341
0000012_10.tif	control	LX704	d23	8.401	15.422	5.4844	6.54306	1.05866	1	0.29777	1.94833	0.315236
0000012_10.tif	control	LX704	d23	9.516	16.13	5.4844	6.2427	0.758297	1	0.29777	1.85889	0.225798
0000012_10.tif	control	LX704	d23	10.115	15.151	5.4844	5.10954	-0.374862	0	0.29777	1.52147	-0.111623
0000012_10.tif	control	LX704	d23	10.708	15.667	5.4844	5.16238	-0.322028	0	0.29777	1.5372	-0.0958903
0000012_10.tif	control	LX704	d23	10.964	15.932	5.4844	5.25866	-0.225745	0	0.29777	1.56587	-0.0672202
0000012_10.tif	control	LX704	d23	11.005	15.812	5.4844	5.13383	-0.35057	0	0.29777	1.5287	-0.104389
0000012_10.tif	control	LX704	d23	11.229	15.807	5.4844	5.0241	-0.460301	0	0.29777	1.49603	-0.137064
0000012_10.tif	control	LX704	d23	11.552	15.745	5.4844	4.8295	-0.654902	0	0.29777	1.43808	-0.19501
0000012_10.tif	control	LX704	d23	9.938	14.156	5.4844	4.55204	-0.932364	0	0.29777	1.35546	-0.27763
0000012_10.tif	control	LX704	d23	9.964	14.224	5.4844	4.57444	-0.909965	0	0.29777	1.36213	-0.27096
0000012_10.tif	control	LX704	d23	9.333	13.708	5.4844	4.80312	-0.681282	0	0.29777	1.43023	-0.202865
0000012_10.tif	control	LX704	d23	8.49	13.672	5.4844	5.53575	0.0513485	1	0.29777	1.64838	0.01529
0000012_10.tif	control	LX704	d23	10.12	13.406	5.4844	3.97194	-1.51246	0	0.29777	1.18272	-0.450366
0000012_10.tif	control	LX704	d23	9.964	13.406	5.4844	4.1057	-1.37871	0	0.29777	1.22255	-0.410537
0000012_10.tif	control	LX704	d23	9.849	13.365	5.4844	4.18518	-1.29923	0	0.29777	1.24622	-0.386871
0000012_10.tif	control	LX704	d23	7.927	12.385	5.4844	5.67726	0.19286	1	0.29777	1.69052	0.0574279
0000012_10.tif	control	LX704	d23	8.385	12.292	5.4844	5.20996	-0.274443	0	0.29777	1.55137	-0.081721
0000012_10.tif	control	LX704	d23	8.448	12.188	5.4844	5.12961	-0.354799	0	0.29777	1.52744	-0.105649
0000012_10.tif	control	LX704	d23	8.438	12.516	5.4844	5.20441	-0.279999	0	0.29777	1.54972	-0.0833754
0000012_10.tif	control	LX704	d23	8.568	12.589	5.4844	5.0955	-0.388907	0	0.29777	1.51729	-0.115805
0000012_10.tif	control	LX704	d23	8.812	12.604	5.4844	4.86338	-0.621029	0	0.29777	1.44817	-0.184924
0000012_10.tif	control	LX704	d23	9.38	12.938	5.4844	4.42806	-1.05634	0	0.29777	1.31854	-0.314547
0000012_10.tif	control	LX704	d23	9.49	12.656	5.4844	4.22893	-1.25548	0	0.29777	1.25925	-0.373844
0000012_10.tif	control	LX704	d23	9.344	12.448	5.4844	4.3091	-1.17531	0	0.29777	1.28312	-0.349971
0000012_10.tif	control	LX704	d23	9.776	12.797	5.4844	4.00792	-1.47649	0	0.29777	1.19344	-0.439654
0000012_10.tif	control	LX704	d23	9.422	12.156	5.4844	4.16611	-1.31829	0	0.29777	1.24054	-0.392549
0000012_10.tif	control	LX704	d23	9.224	12.016	5.4844	4.33593	-1.14847	0	0.29777	1.29111	-0.341981
0000012_10.tif	control	LX704	d23	9.245	11.896	5.4844	4.2977	-1.1867	0	0.29777	1.27973	-0.353365
0000012_10.tif	control	LX704	d23	9.021	11.891	5.4844	4.51921	-0.965198	0	0.29777	1.34568	-0.287407
0000012_10.tif	control	LX704	d23	9.026	11.776	5.4844	4.50135	-0.983055	0	0.29777	1.34037	-0.292724
0000012_10.tif	control	LX704	d23	8.922	11.901	5.4844	4.61868	-0.865723	0	0.29777	1.3753	-0.257786
0000012_10.tif	control	LX704	d23	9.109	11.745	5.4844	4.41573	-1.06867	0	0.29777	1.31487	-0.318218
0000012_10.tif	control	LX704	d23	9.641	11.828	5.4844	3.89622	-1.58819	0	0.29777	1.16018	-0.472915
0000012_10.tif	control	LX704	d23	9.745	11.625	5.4844	3.77171	-1.71269	0	0.29777	1.1231	-0.509989
0000012_10.tif	control	LX704	d23	9.979	11.552	5.4844	3.53311	-1.9513	0	0.29777	1.05205	-0.581038
0000012_10.tif	control	LX704	d23	9.828	11.198	5.4844	3.6793	-1.80511	0	0.29777	1.09558	-0.537507
0000012_10.tif	control	LX704	d23	9.927	11.172	5.4844	3.5814	-1.90301	0	0.29777	1.06643	-0.566658
0000012_10.tif	control	LX704	d23	9.474	11.286	5.4844	4.03122	-1.45319	0	0.29777	1.20038	-0.432715
0000012_10.tif	control	LX704	d23	9.443	10.589	5.4844	4.12868	-1.35573	0	0.29777	1.2294	-0.403695
0000012_10.tif	control	LX704	d23	7.229	9.823	5.4844	6.45393	0.969525	1	0.29777	1.92179	0.288695
0000012_10.tif	control	LX704	d23	7.307	9.885	5.4844	6.36376	0.879356	1	0.29777	1.89494	0.261846
0000012_10.tif	control	LX704	d23	7.156	10.208	5.4844	6.44703	0.962626	1	0.29777	1.91973	0.286641
0000012_10.tif	control	LX704	d23	7.214	10.307	5.4844	6.37331	0.888909	1	0.29777	1.89778	0.26469
0000012_10.tif	control	LX704	d23	7.359	10.193	5.4844	6.24992	0.765519	1	0.29777	1.86104	0.227949
0000012_10.tif	control	LX704	d23	8.167	10.078	5.4844	5.4824	-0.00200138	0	0.29777	1.6325	-0.000595949
0000012_10.tif	control	LX704	d23	8.271	9.922	5.4844	5.41956	-0.0648481	0	0.29777	1.61378	-0.0193098
0000012_10.tif	control	LX704	d23	8.969	9.885	5.4844	4.75999	-0.72441	0	0.29777	1.41738	-0.215708
0000012_10.tif	control	LX704	d23	10.005	8.865	5.4844	4.27976	-1.20464	0	0.29777	1.27438	-0.358706
0000012_10.tif	control	LX704	d23	9.771	7.818	5.4844	5.12473	-0.359675	0	0.29777	1.52599	-0.1071
0000012_10.tif	control	LX704	d23	9.938	8.26	5.4844	4.7049	-0.779501	0	0.29777	1.40098	-0.232112
0000012_10.tif	control	LX704	d23	10.036	8.307	5.4844	4.60004	-0.884361	0	0.29777	1.36976	-0.263336
0000012_10.tif	control	LX704	d23	10.208	8.479	5.4844	4.35741	-1.127	0	0.29777	1.29751	-0.335586
0000012_10.tif	control	LX704	d23	11.573	8.536	5.4844	3.39527	-2.08913	0	0.29777	1.01101	-0.62208
0000012_10.tif	control	LX704	d23	11.604	8.438	5.4844	3.45918	-2.02523	0	0.29777	1.03004	-0.603052
0000012_10.tif	control	LX704	d23	11.432	8.302	5.4844	3.66797	-1.81643	0	0.29777	1.09221	-0.54088
0000012_10.tif	control	LX704	d23	11.297	8.271	5.4844	3.77101	-1.71339	0	0.29777	1.12289	-0.510198
0000012_10.tif	control	LX704	d23	10.932	9.708	5.4844	3.04051	-2.44389	0	0.29777	0.905374	-0.727717
0000012_10.tif	control	LX704	d23	11.714	9.651	5.4844	2.45357	-3.03083	0	0.29777	0.7306	-0.902491
0000012_10.tif	control	LX704	d23	11.198	8.12	5.4844	3.95139	-1.53301	0	0.29777	1.17661	-0.456485
0000012_10.tif	control	LX704	d23	10.896	8.099	5.4844	4.1513	-1.3331	0	0.29777	1.23613	-0.396957
0000012_10.tif	control	LX704	d23	10.776	8.188	5.4844	4.16017	-1.32423	0	0.29777	1.23877	-0.394316
0000012_10.tif	control	LX704	d23	10.615	7.646	5.4844	4.68073	-0.803675	0	0.29777	1.39378	-0.23931
0000012_10.tif	control	LX704	d23	10.698	7.635	5.4844	4.6387	-0.845709	0	0.29777	1.38126	-0.251827
0000012_10.tif	control	LX704	d23	10.771	7.75	5.4844	4.50298	-0.981423	0	0.29777	1.34085	-0.292238
0000012_10.tif	control	LX704	d23	10.99	7.828	5.4844	4.3099	-1.17451	0	0.29777	1.28336	-0.349733
0000012_10.tif	control	LX704	d23	11.073	7.823	5.4844	4.2661	-1.2183	0	0.29777	1.27032	-0.362773
0000012_10.tif	control	LX704	d23	11.453	7.193	5.4844	4.61616	-0.868245	0	0.29777	1.37455	-0.258537
0000012_10.tif	control	LX704	d23	11.401	7.13	5.4844	4.69574	-0.78866	0	0.29777	1.39825	-0.234839
0000012_10.tif	control	LX704	d23	9.958	5.146	5.4844	7.12729	1.64289	1	0.29777	2.12229	0.489203
0000012_10.tif	control	LX704	d23	9.578	5	5.4844	7.44748	1.96307	1	0.29777	2.21764	0.584544
0000012_10.tif	control	LX704	d23	8.484	4.5	5.4844	8.47538	2.99097	1	0.29777	2.52371	0.890622
0000012_10.tif	control	LX704	d23	8.5	4.594	5.4844	8.39028	2.90587	1	0.29777	2.49837	0.865282
0000012_10.tif	control	LX704	d23	8.677	3.776	5.4844	8.96339	3.47898	1	0.29777	2.66903	1.03594
0000012_10.tif	control	LX704	d23	8.776	3.828	5.4844	8.86642	3.38202	1	0.29777	2.64015	1.00706
0000012_10.tif	control	LX704	d23	8.891	4.177	5.4844	8.51033	3.02593	1	0.29777	2.53412	0.901031
0000012_10.tif	control	LX704	d23	8.995	4.146	5.4844	8.48064	2.99623	1	0.29777	2.52528	0.892189
0000012_10.tif	control	LX704	d23	9.078	4.089	5.4844	8.48537	3.00096	1	0.29777	2.52669	0.893597
0000012_10.tif	control	LX704	d23	9.359	4.328	5.4844	8.13568	2.65128	1	0.29777	2.42256	0.789471
0000012_10.tif	control	LX704	d23	9.422	4.323	5.4844	8.10808	2.62367	1	0.29777	2.41434	0.781251
0000012_10.tif	control	LX704	d23	9.484	4.521	5.4844	7.90593	2.42152	1	0.29777	2.35415	0.721057
0000012_10.tif	control	LX704	d23	15.318	5.245	5.4844	6.34743	0.863025	1	0.29777	1.89007	0.256983
0000012_10.tif	control	LX704	d23	15.172	5.281	5.4844	6.27257	0.788163	1	0.29777	1.86778	0.234691
0000012_10.tif	control	LX704	d23	15.651	6.266	5.4844	5.49811	0.0137006	1	0.29777	1.63717	0.00407964
0000012_10.tif	control	LX704	d23	15.443	6.266	5.4844	5.4203	-0.0641012	0	0.29777	1.614	-0.0190874
0000012_10.tif	control	LX704	d23	13.219	6.922	5.4844	4.41527	-1.06913	0	0.29777	1.31474	-0.318355
0000012_10.tif	control	LX704	d23	13.422	7.182	5.4844	4.14683	-1.33757	0	0.29777	1.2348	-0.398289
0000012_10.tif	control	LX704	d23	12.214	8.13	5.4844	3.44875	-2.03565	0	0.29777	1.02693	-0.606156
0000012_10.tif	control	LX704	d23	12.604	8.146	5.4844	3.3071	-2.1773	0	0.29777	0.984756	-0.648335
0000012_10.tif	control	LX704	d23	14.255	6.651	5.4844	4.73675	-0.747651	0	0.29777	1.41046	-0.222628
0000012_10.tif	control	LX704	d23	14.76	6.87	5.4844	4.63128	-0.853121	0	0.29777	1.37906	-0.254034
0000012_10.tif	control	LX704	d23	16.036	7.255	5.4844	4.79534	-0.689064	0	0.29777	1.42791	-0.205183
0000012_10.tif	control	LX704	d23	16.026	7.339	5.4844	4.71885	-0.765553	0	0.29777	1.40513	-0.227959
0000012_10.tif	control	LX704	d23	16.37	7.594	5.4844	4.70648	-0.777922	0	0.29777	1.40145	-0.231642
0000012_10.tif	control	LX704	d23	15.255	7.495	5.4844	4.2136	-1.27081	0	0.29777	1.25468	-0.378409
0000012_10.tif	control	LX704	d23	15.281	7.599	5.4844	4.13033	-1.35408	0	0.29777	1.22989	-0.403203
0000012_10.tif	control	LX704	d23	15.078	7.865	5.4844	3.80351	-1.68089	0	0.29777	1.13257	-0.50052
0000012_10.tif	control	LX704	d23	15.135	8.328	5.4844	3.41422	-2.07018	0	0.29777	1.01665	-0.616439
0000012_10.tif	control	LX704	d23	15.547	8.005	5.4844	3.90027	-1.58414	0	0.29777	1.16138	-0.471708
0000012_10.tif	control	LX704	d23	15.677	7.698	5.4844	4.23019	-1.25422	0	0.29777	1.25962	-0.373468
0000012_10.tif	control	LX704	d23	15.682	9.74	5.4844	2.69464	-2.78977	0	0.29777	0.802382	-0.830709
0000012_10.tif	control	LX704	d23	15.339	9.849	5.4844	2.35606	-3.12835	0	0.29777	0.701563	-0.931529
0000012_10.tif	control	LX704	d23	14.656	10.339	5.4844	1.51754	-3.96687	0	0.29777	0.451877	-1.18121
0000012_10.tif	control	LX704	d23	12.125	10.938	5.4844	1.43405	-4.05035	0	0.29777	0.427017	-1.20607
0000012_10.tif	control	LX704	d23	12.635	10.885	5.4844	0.976294	-4.50811	0	0.29777	0.290711	-1.34238
0000012_10.tif	control	LX704	d23	12.703	10.818	5.4844	0.950423	-4.53398	0	0.29777	0.283007	-1.35008
0000012_10.tif	control	LX704	d23	13.323	11.922	5.4844	0.621257	-4.86315	0	0.29777	0.184992	-1.4481
0000012_10.tif	control	LX704	d23	13.505	11.807	5.4844	0.479	-5.0054	0	0.29777	0.142632	-1.49046
0000012_10.tif	control	LX704	d23	13.755	11.62	5.4844	0.384401	-5.1	0	0.29777	0.114463	-1.51863
0000012_10.tif	control	LX704	d23	13.703	11.479	5.4844	0.249008	-5.2354	0	0.29777	0.0741471	-1.55894
0000012_10.tif	control	LX704	d23	13.75	11.365	5.4844	0.247778	-5.23663	0	0.29777	0.0737809	-1.55931
0000012_10.tif	control	LX704	d23	13.896	11.323	5.4844	0.391032	-5.09337	0	0.29777	0.116438	-1.51665
0000012_10.tif	control	LX704	d23	16.531	11.688	5.4844	3.04734	-2.43707	0	0.29777	0.907406	-0.725685
0000012_10.tif	control	LX704	d23	16.672	11.745	5.4844	3.19434	-2.29007	0	0.29777	0.951177	-0.681914
0000012_10.tif	control	LX704	d23	15.964	11.922	5.4844	2.52973	-2.95468	0	0.29777	0.753277	-0.879814
0000012_10.tif	control	LX704	d23	16.292	12.156	5.4844	2.9074	-2.57701	0	0.29777	0.865735	-0.767356
0000012_10.tif	control	LX704	d23	13.812	13.005	5.4844	1.70487	-3.77954	0	0.29777	0.507659	-1.12543
0000012_10.tif	control	LX704	d23	14.026	13.224	5.4844	1.96628	-3.51812	0	0.29777	0.585499	-1.04759
0000012_10.tif	control	LX704	d23	14.094	14.047	5.4844	2.78206	-2.70234	0	0.29777	0.828415	-0.804676
0000012_10.tif	control	LX704	d23	12.729	14.823	5.4844	3.58011	-1.90429	0	0.29777	1.06605	-0.567041
0000012_10.tif	control	LX704	d23	12.677	14.74	5.4844	3.51103	-1.97338	0	0.29777	1.04548	-0.587612
0000012_10.tif	control	LX704	d23	12.578	14.651	5.4844	3.44988	-2.03453	0	0.29777	1.02727	-0.605821
0000012_10.tif	control	LX704	d23	12.349	15.479	5.4844	4.30896	-1.17544	0	0.29777	1.28308	-0.350012
0000012_10.tif	control	LX704	d23	12.438	15.51	5.4844	4.31597	-1.16843	0	0.29777	1.28517	-0.347924
0000012_10.tif	control	LX704	d23	12.51	15.724	5.4844	4.5072	-0.977206	0	0.29777	1.34211	-0.290983
0000012_10.tif	control	LX704	d23	12.766	15.052	5.4844	3.79662	-1.68779	0	0.29777	1.13052	-0.502573
0000012_10.tif	control	LX704	d23	12.714	15.75	5.4844	4.49219	-0.992215	0	0.29777	1.33764	-0.295452
0000012_10.tif	control	LX704	d23	13.469	15.802	5.4844	4.47414	-1.01026	0	0.29777	1.33227	-0.300825
0000012_10.tif	control	LX704	d23	13.62	16.052	5.4844	4.7254	-0.759005	0	0.29777	1.40708	-0.226009
0000012_10.tif	control	LX704	d23	13.828	15.854	5.4844	4.53751	-0.946894	0	0.29777	1.35113	-0.281957
0000012_10.tif	control	LX704	d23	13.828	15.745	5.4844	4.42879	-1.05561	0	0.29777	1.31876	-0.314329
0000012_10.tif	control	LX704	d23	13.844	16.271	5.4844	4.95461	-0.529794	0	0.29777	1.47533	-0.157757
0000012_10.tif	control	LX704	d23	14.266	16.198	5.4844	4.9291	-0.555305	0	0.29777	1.46774	-0.165353
0000012_10.tif	control	LX704	d23	14.49	16.135	5.4844	4.90688	-0.577524	0	0.29777	1.46112	-0.171969
0000012_10.tif	control	LX704	d23	14.38	16.385	5.4844	5.13214	-0.352263	0	0.29777	1.5282	-0.104893
0000012_10.tif	control	LX704	d23	14.26	16.359	5.4844	5.08734	-0.397069	0	0.29777	1.51486	-0.118235
0000012_10.tif	control	LX704	d23	14.214	16.432	5.4844	5.15301	-0.331396	0	0.29777	1.53441	-0.0986798
0000012_10.tif	control	LX704	d23	14.312	16.469	5.4844	5.20395	-0.280451	0	0.29777	1.54958	-0.08351
0000012_10.tif	control	LX704	d23	14.203	16.531	5.4844	5.24961	-0.234794	0	0.29777	1.56318	-0.0699145
0000012_10.tif	control	LX704	d23	14.583	15.74	5.4844	4.54179	-0.942618	0	0.29777	1.35241	-0.280683
0000012_10.tif	control	LX704	d23	14.859	15.234	5.4844	4.13402	-1.35038	0	0.29777	1.23099	-0.402103
0000012_10.tif	control	LX704	d23	14.885	15.099	5.4844	4.01557	-1.46883	0	0.29777	1.19572	-0.437373
0000012_10.tif	control	LX704	d23	15.016	15.464	5.4844	4.40336	-1.08104	0	0.29777	1.31119	-0.321901
0000012_10.tif	control	LX704	d23	15.12	15.479	5.4844	4.4541	-1.0303	0	0.29777	1.3263	-0.306793
0000012_10.tif	control	LX704	d23	15.333	15.427	5.4844	4.48814	-0.996266	0	0.29777	1.33643	-0.296658
0000012_10.tif	control	LX704	d23	14.974	15.75	5.4844	4.65962	-0.824786	0	0.29777	1.38749	-0.245597
0000012_10.tif	control	LX704	d23	15.068	15.828	5.4844	4.76371	-0.720691	0	0.29777	1.41849	-0.2146
0000012_10.tif	control	LX704	d23	15.099	16.172	5.4844	5.09953	-0.384878	0	0.29777	1.51849	-0.114605
0000012_10.tif	control	LX704	d23	15.115	16.615	5.4844	5.52671	0.0423006	1	0.29777	1.64569	0.0125958
0000012_10.tif	control	LX704	d23	15.974	16.583	5.4844	5.80612	0.321712	1	0.29777	1.72889	0.0957961
0000012_10.tif	control	LX704	d23	15.974	15.26	5.4844	4.64291	-0.841498	0	0.29777	1.38252	-0.250573
0000012_10.tif	control	LX704	d23	16.193	15.333	5.4844	4.82342	-0.660986	0	0.29777	1.43627	-0.196822
0000012_10.tif	control	LX704	d23	16.297	15.219	5.4844	4.78907	-0.695339	0	0.29777	1.42604	-0.207051
0000012_10.tif	control	LX704	d23	16.349	15.115	5.4844	4.736	-0.748404	0	0.29777	1.41024	-0.222852
0000012_10.tif	control	LX704	d23	16.104	14.88	5.4844	4.40131	-1.0831	0	0.29777	1.31058	-0.322514
0000012_10.tif	control	LX704	d23	16.109	14.76	5.4844	4.30807	-1.17634	0	0.29777	1.28281	-0.350278
0000012_10.tif	control	LX704	d23	16.016	14.76	5.4844	4.2525	-1.23191	0	0.29777	1.26627	-0.366825
0000012_10.tif	control	LX704	d23	15.812	14.766	5.4844	4.1403	-1.3441	0	0.29777	1.23286	-0.400234
0000012_10.tif	control	LX704	d23	16.719	14.365	5.4844	4.4219	-1.06251	0	0.29777	1.31671	-0.316383
0000012_10.tif	control	LX704	d23	16.75	14.01	5.4844	4.20989	-1.27452	0	0.29777	1.25358	-0.379513
0000012_10.tif	control	LX704	d23	12.578	17.651	5.4844	6.39059	0.906187	1	0.29777	1.90293	0.269835
0000012_10.tif	control	LX704	d23	12.693	17.526	5.4844	6.25096	0.766559	1	0.29777	1.86135	0.228258
0000012_10.tif	control	LX704	d23	13.573	17.349	5.4844	6.02138	0.536979	1	0.29777	1.79299	0.159896
0000012_10.tif	control	LX704	d23	16.021	18.557	5.4844	7.65433	2.16992	1	0.29777	2.27923	0.646137
0000012_10.tif	control	LX704	d23	16.833	14.323	5.4844	4.47723	-1.00717	0	0.29777	1.33319	-0.299906
0000012_10.tif	control	LX704	d23	16.995	14.391	5.4844	4.6435	-0.840907	0	0.29777	1.38269	-0.250397
0000012_10.tif	control	LX704	d23	17.349	13.5	5.4844	4.41519	-1.06921	0	0.29777	1.31471	-0.318379
0000012_10.tif	control	LX704	d23	18.167	13.005	5.4844	4.95445	-0.529955	0	0.29777	1.47529	-0.157805
0000012_10.tif	control	LX704	d23	17.021	11.776	5.4844	3.54443	-1.93998	0	0.29777	1.05542	-0.577667
0000012_10.tif	control	LX704	d23	17.01	11.182	5.4844	3.50804	-1.97637	0	0.29777	1.04459	-0.588502
0000012_10.tif	control	LX704	d23	17.234	11.109	5.4844	3.73543	-1.74898	0	0.29777	1.1123	-0.520794
0000012_10.tif	control	LX704	d23	17.323	11.089	5.4844	3.82547	-1.65893	0	0.29777	1.13911	-0.49398
0000012_10.tif	control	LX704	d23	17.938	11.422	5.4844	4.434	-1.05041	0	0.29777	1.32031	-0.31278
0000012_10.tif	control	LX704	d23	18.875	12.724	5.4844	5.54849	0.0640832	1	0.29777	1.65217	0.0190821
0000012_10.tif	control	LX704	d23	19.406	12.297	5.4844	5.98003	0.495626	1	0.29777	1.78067	0.147582
0000012_10.tif	control	LX704	d23	18.854	11.219	5.4844	5.35011	-0.134294	0	0.29777	1.5931	-0.0399887
0000012_10.tif	control	LX704	d23	18.901	11.146	5.4844	5.39907	-0.0853361	0	0.29777	1.60768	-0.0254105
0000012_10.tif	control	LX704	d23	19.036	11.583	5.4844	5.53688	0.0524706	1	0.29777	1.64872	0.0156242
0000012_10.tif	control	LX704	d23	19.26	11.333	5.4844	5.755	0.270598	1	0.29777	1.71367	0.0805759
0000012_10.tif	control	LX704	d23	19.297	11.281	5.4844	5.79219	0.307786	1	0.29777	1.72474	0.0916495
0000012_10.tif	control	LX704	d23	19.312	11.443	5.4844	5.80814	0.323734	1	0.29777	1.72949	0.0963983
0000012_10.tif	control	LX704	d23	18.656	10.599	5.4844	5.20233	-0.282074	0	0.29777	1.5491	-0.0839932
0000012_10.tif	control	LX704	d23	21.286	11.125	5.4844	7.78365	2.29924	1	0.29777	2.31774	0.684646
0000012_10.tif	control	LX704	d23	21.953	11.214	5.4844	8.44877	2.96436	1	0.29777	2.51579	0.882699
0000012_10.tif	control	LX704	d23	22.083	11.135	5.4844	8.58017	3.09577	1	0.29777	2.55492	0.921826
0000012_10.tif	control	LX704	d23	17.62	9.708	5.4844	4.4224	-1.062	0	0.29777	1.31686	-0.316233
0000012_10.tif	control	LX704	d23	18.005	9.427	5.4844	4.88506	-0.599346	0	0.29777	1.45462	-0.178467
0000012_10.tif	control	LX704	d23	18.281	9.448	5.4844	5.1327	-0.351708	0	0.29777	1.52836	-0.104728
0000012_10.tif	control	LX704	d23	17.641	8.276	5.4844	5.14016	-0.344249	0	0.29777	1.53058	-0.102507
00000013_4.tif	predator	IV984	d14	6.734	8.062	6.43755	7.68703	1.24948	1	0.29777	2.28897	0.372058
00000013_4.tif	predator	IV984	d14	7.042	8.411	6.43755	7.25161	0.81406	1	0.29777	2.15931	0.242403
00000013_4.tif	predator	IV984	d14	4.38	9.552	6.43755	9.36651	2.92896	1	0.29777	2.78906	0.872155
00000013_4.tif	predator	IV984	d14	4.333	10.198	6.43755	9.28411	2.84656	1	0.29777	2.76453	0.847619
00000013_4.tif	predator	IV984	d14	4.807	11.25	6.43755	8.6962	2.25865	1	0.29777	2.58947	0.672559
00000013_4.tif	predator	IV984	d14	5.74	10.224	6.43755	7.89478	1.45723	1	0.29777	2.35083	0.433919
00000013_4.tif	predator	IV984	d14	6.255	9.63	6.43755	7.53333	1.09578	1	0.29777	2.2432	0.32629
00000013_4.tif	predator	IV984	d14	6.292	9.536	6.43755	7.52466	1.08711	1	0.29777	2.24062	0.323708
00000013_4.tif	predator	IV984	d14	6.208	10.615	6.43755	7.36672	0.929168	1	0.29777	2.19359	0.276678
00000013_4.tif	predator	IV984	d14	6.292	10.766	6.43755	7.26213	0.824584	1	0.29777	2.16245	0.245536
00000013_4.tif	predator	IV984	d14	5.229	12.469	6.43755	8.29408	1.85653	1	0.29777	2.46973	0.552818
00000013_4.tif	predator	IV984	d14	5.182	12.573	6.43755	8.35076	1.91321	1	0.29777	2.48661	0.569697
00000013_4.tif	predator	IV984	d14	5.255	13.344	6.43755	8.39187	1.95432	1	0.29777	2.49885	0.581938
00000013_4.tif	predator	IV984	d14	5.427	15.5	6.43755	8.90126	2.46371	1	0.29777	2.65053	0.733619
00000013_4.tif	predator	IV984	d14	5.583	15.641	6.43755	8.82181	2.38426	1	0.29777	2.62687	0.709962
00000013_4.tif	predator	IV984	d14	5.698	17.401	6.43755	9.63778	3.20023	1	0.29777	2.86984	0.952933
00000013_4.tif	predator	IV984	d14	5.755	17.391	6.43755	9.58585	3.1483	1	0.29777	2.85438	0.937469
00000013_4.tif	predator	IV984	d14	7.031	18.214	6.43755	9.15281	2.71526	1	0.29777	2.72543	0.808523
00000013_4.tif	predator	IV984	d14	7.401	18.698	6.43755	9.25434	2.81679	1	0.29777	2.75567	0.838757
00000013_4.tif	predator	IV984	d14	9.177	17.74	6.43755	7.39825	0.9607	1	0.29777	2.20298	0.286068
00000013_4.tif	predator	IV984	d14	9.062	19.557	6.43755	8.9936	2.55605	1	0.29777	2.67802	0.761114
00000013_4.tif	predator	IV984	d14	8.578	20.151	6.43755	9.74976	3.31221	1	0.29777	2.90319	0.986277
00000013_4.tif	predator	IV984	d14	9.099	19.786	6.43755	9.17584	2.7383	1	0.29777	2.73229	0.815382
00000013_4.tif	predator	IV984	d14	9.042	20.365	6.43755	9.71418	3.27663	1	0.29777	2.89259	0.975681
00000013_4.tif	predator	IV984	d14	9.135	20.344	6.43755	9.6532	3.21565	1	0.29777	2.87443	0.957524
00000013_4.tif	predator	IV984	d14	9.161	20.177	6.43755	9.49257	3.05502	1	0.29777	2.8266	0.909695
00000013_4.tif	predator	IV984	d14	11.443	21.125	6.43755	9.61639	3.17884	1	0.29777	2.86347	0.946565
00000013_4.tif	predator	IV984	d14	10.693	20.609	6.43755	9.31008	2.87253	1	0.29777	2.77226	0.855354
00000013_4.tif	predator	IV984	d14	10.177	19.979	6.43755	8.89036	2.45281	1	0.29777	2.64728	0.730373
00000013_4.tif	predator	IV984	d14	10.312	19.849	6.43755	8.71975	2.2822	1	0.29777	2.59648	0.679572
00000013_4.tif	predator	IV984	d14	10.328	19.599	6.43755	8.48146	2.04391	1	0.29777	2.52552	0.608615
00000013_4.tif	predator	IV984	d14	10.443	19.609	6.43755	8.44859	2.01104	1	0.29777	2.51574	0.598827
00000013_4.tif	predator	IV984	d14	12.839	18.432	6.43755	6.73454	0.29699	1	0.29777	2.00534	0.0884346
00000013_4.tif	predator	IV984	d14	10.51	17.172	6.43755	6.20537	-0.232176	0	0.29777	1.84777	-0.0691352
00000013_4.tif	predator	IV984	d14	11.604	5.339	6.43755	6.66251	0.224965	1	0.29777	1.9839	0.0669879
00000013_4.tif	predator	IV984	d14	11.667	5.156	6.43755	6.82112	0.38357	1	0.29777	2.03112	0.114215
00000013_4.tif	predator	IV984	d14	9.792	2.885	6.43755	9.58601	3.14846	1	0.29777	2.85443	0.937516
00000013_4.tif	predator	IV984	d14	12.938	2.193	6.43755	9.55196	3.11441	1	0.29777	2.84429	0.927379
00000013_4.tif	predator	IV984	d14	12.885	1.995	6.43755	9.75278	3.31523	1	0.29777	2.90409	0.987177
00000013_4.tif	predator	IV984	d14	13.328	1.656	6.43755	10.0743	3.63675	1	0.29777	2.99983	1.08292
00000013_4.tif	predator	IV984	d14	13.667	2.115	6.43755	9.61563	3.17808	1	0.29777	2.86325	0.946337
00000013_4.tif	predator	IV984	d14	13.964	2.688	6.43755	9.05342	2.61587	1	0.29777	2.69584	0.778927
00000013_4.tif	predator	IV984	d14	14.74	1.839	6.43755	9.96868	3.53113	1	0.29777	2.96837	1.05147
00000013_4.tif	predator	IV984	d14	14.818	1.724	6.43755	10.0928	3.6552	1	0.29777	3.00532	1.08841
00000013_4.tif	predator	IV984	d14	14.714	1.625	6.43755	10.1779	3.74032	1	0.29777	3.03066	1.11375
00000013_4.tif	predator	IV984	d14	15.63	1.839	6.43755	10.1189	3.68133	1	0.29777	3.0131	1.09619
00000013_4.tif	predator	IV984	d14	17.609	2.417	6.43755	10.1823	3.74476	1	0.29777	3.03199	1.11508
00000013_4.tif	predator	IV984	d14	17.797	2.516	6.43755	10.17	3.73249	1	0.29777	3.02833	1.11142
00000013_4.tif	predator	IV984	d14	18.656	4.859	6.43755	8.59561	2.15806	1	0.29777	2.55951	0.642605
00000013_4.tif	predator	IV984	d14	18.49	7.292	6.43755	6.68483	0.247282	1	0.29777	1.99054	0.0736332
00000013_4.tif	predator	IV984	d14	18.88	7.781	6.43755	6.68123	0.243679	1	0.29777	1.98947	0.0725602
00000013_4.tif	predator	IV984	d14	18.656	9.37	6.43755	5.67912	-0.758426	0	0.29777	1.69107	-0.225837
00000013_4.tif	predator	IV984	d14	16.583	14.057	6.43755	3.87121	-2.56634	0	0.29777	1.15273	-0.76418
00000013_4.tif	predator	IV984	d14	17.042	14.672	6.43755	4.6128	-1.82475	0	0.29777	1.37355	-0.543355
00000013_4.tif	predator	IV984	d14	18.625	15.693	6.43755	6.48703	0.0494781	1	0.29777	1.93164	0.0147331
00000013_4.tif	predator	IV984	d14	18.443	15.823	6.43755	6.42597	-0.0115826	0	0.29777	1.91346	-0.00344894
00000013_4.tif	predator	IV984	d14	17.203	17.214	6.43755	6.62356	0.186015	1	0.29777	1.9723	0.0553895
00000013_4.tif	predator	IV984	d14	13.141	18.307	6.43755	6.58725	0.149703	1	0.29777	1.96149	0.044577
00000013_4.tif	predator	IV984	d14	13.589	19.208	6.43755	7.47966	1.04211	1	0.29777	2.22722	0.310308
00000013_4.tif	predator	IV984	d14	14.141	18.922	6.43755	7.2224	0.78485	1	0.29777	2.15061	0.233705
00000013_4.tif	predator	IV984	d14	14.099	20.224	6.43755	8.5168	2.07925	1	0.29777	2.53605	0.619139
00000013_4.tif	predator	IV984	d14	13.964	20.646	6.43755	8.92959	2.49204	1	0.29777	2.65896	0.742055
00000013_4.tif	predator	IV984	d14	13.932	20.849	6.43755	9.1307	2.69316	1	0.29777	2.71885	0.801941
00000013_4.tif	predator	IV984	d14	13.141	21.031	6.43755	9.30854	2.871	1	0.29777	2.77181	0.854896
00000013_4.tif	predator	IV984	d14	13.24	21.453	6.43755	9.72721	3.28966	1	0.29777	2.89647	0.979563
00000013_4.tif	predator	IV984	d14	13.307	21.443	6.43755	9.71572	3.27817	1	0.29777	2.89305	0.976142
00000013_4.tif	predator	IV984	d14	15.411	19.875	6.43755	8.36944	1.93189	1	0.29777	2.49217	0.57526
00000013_4.tif	predator	IV984	d14	15.417	20.312	6.43755	8.79666	2.35911	1	0.29777	2.61938	0.702472
00000013_4.tif	predator	IV984	d14	15.495	20.26	6.43755	8.76345	2.3259	1	0.29777	2.60949	0.692582
00000013_4.tif	predator	IV984	d14	16.354	21.26	6.43755	9.95201	3.51446	1	0.29777	2.96341	1.0465
00000013_4.tif	predator	IV984	d14	16.594	21.297	6.43755	10.0589	3.62135	1	0.29777	2.99524	1.07833
00000013_4.tif	predator	IV984	d14	17.693	21.193	6.43755	10.3553	3.91776	1	0.29777	3.0835	1.16659
00000013_4.tif	predator	IV984	d14	17.87	20.901	6.43755	10.1642	3.7266	1	0.29777	3.02658	1.10967
00000013_4.tif	predator	IV984	d14	16.417	19.448	6.43755	8.25532	1.81777	1	0.29777	2.45819	0.541277
00000013_4.tif	predator	IV984	d14	18.833	18.198	6.43755	8.39021	1.95266	1	0.29777	2.49835	0.581444
00000013_4.tif	predator	IV984	d14	18.714	18.276	6.43755	8.37576	1.93821	1	0.29777	2.49405	0.577142
00000013_4.tif	predator	IV984	d14	17.625	17.974	6.43755	7.48988	1.05233	1	0.29777	2.23026	0.313352
00000013_4.tif	predator	IV984	d14	19.719	18.542	6.43755	9.23133	2.79378	1	0.29777	2.74881	0.831903
00000013_4.tif	predator	IV984	d14	19.88	18.609	6.43755	9.3897	2.95215	1	0.29777	2.79597	0.879063
00000013_4.tif	predator	IV984	d14	22.234	17.807	6.43755	10.6489	4.21138	1	0.29777	3.17093	1.25402
00000013_4.tif	predator	IV984	d14	22.573	17.349	6.43755	10.6811	4.24352	1	0.29777	3.1805	1.26359
00000013_4.tif	predator	IV984	d14	22.323	17.005	6.43755	10.2887	3.85119	1	0.29777	3.06368	1.14677
00000013_4.tif	predator	IV984	d14	22.406	16.99	6.43755	10.3524	3.9149	1	0.29777	3.08265	1.16574
00000013_4.tif	predator	IV984	d14	21.661	16.396	6.43755	9.4099	2.97235	1	0.29777	2.80198	0.885076
00000013_4.tif	predator	IV984	d14	22.547	16.615	6.43755	10.2909	3.85333	1	0.29777	3.06432	1.14741
00000013_4.tif	predator	IV984	d14	22.536	16.167	6.43755	10.076	3.63846	1	0.29777	3.00033	1.08342
00000013_4.tif	predator	IV984	d14	23.76	16.099	6.43755	11.1611	4.72354	1	0.29777	3.32344	1.40653
00000013_4.tif	predator	IV984	d14	23.427	15.458	6.43755	10.6136	4.17609	1	0.29777	3.16042	1.24352
00000013_4.tif	predator	IV984	d14	22.234	15.12	6.43755	9.37851	2.94096	1	0.29777	2.79264	0.875729
00000013_4.tif	predator	IV984	d14	23.875	14.812	6.43755	10.833	4.39542	1	0.29777	3.22573	1.30882
00000013_4.tif	predator	IV984	d14	23.875	14.583	6.43755	10.77	4.33248	1	0.29777	3.20699	1.29008
00000013_4.tif	predator	IV984	d14	21.349	13.141	6.43755	7.98484	1.54729	1	0.29777	2.37764	0.460736
00000013_4.tif	predator	IV984	d14	22.115	12.453	6.43755	8.65533	2.21778	1	0.29777	2.5773	0.66039
00000013_4.tif	predator	IV984	d14	21.74	11.734	6.43755	8.25	1.81245	1	0.29777	2.4566	0.539694
00000013_4.tif	predator	IV984	d14	21.964	11.229	6.43755	8.48874	2.05119	1	0.29777	2.52769	0.610783
00000013_4.tif	predator	IV984	d14	22.12	11.37	6.43755	8.63746	2.19991	1	0.29777	2.57198	0.655069
00000013_4.tif	predator	IV984	d14	22.219	11.458	6.43755	8.73321	2.29566	1	0.29777	2.60049	0.683578
00000013_4.tif	predator	IV984	d14	22.172	11.917	6.43755	8.68404	2.24649	1	0.29777	2.58585	0.668936
00000013_4.tif	predator	IV984	d14	22.344	11.917	6.43755	8.856	2.41845	1	0.29777	2.63705	0.720141
00000013_4.tif	predator	IV984	d14	22.49	11.589	6.43755	9.00109	2.56354	1	0.29777	2.68025	0.763345
00000013_4.tif	predator	IV984	d14	24.281	11.932	6.43755	10.7929	4.35536	1	0.29777	3.2138	1.2969
00000013_4.tif	predator	IV984	d14	24.354	11.891	6.43755	10.8652	4.42766	1	0.29777	3.23533	1.31842
00000013_4.tif	predator	IV984	d14	23.24	9.651	6.43755	9.96898	3.53143	1	0.29777	2.96846	1.05155
00000013_4.tif	predator	IV984	d14	23.25	9.469	6.43755	10.0182	3.58069	1	0.29777	2.98313	1.06622
00000013_4.tif	predator	IV984	d14	19.651	9.323	6.43755	6.61413	0.176584	1	0.29777	1.96949	0.0525815
00000013_4.tif	predator	IV984	d14	23.776	8.995	6.43755	10.6431	4.2056	1	0.29777	3.16921	1.2523
00000013_4.tif	predator	IV984	d14	23.443	8.823	6.43755	10.3686	3.93101	1	0.29777	3.08745	1.17054
00000013_4.tif	predator	IV984	d14	21.865	7.688	6.43755	9.29894	2.86139	1	0.29777	2.76895	0.852037
00000013_4.tif	predator	IV984	d14	21.922	7.552	6.43755	9.40989	2.97234	1	0.29777	2.80198	0.885073
00000013_4.tif	predator	IV984	d14	22.531	7.76	6.43755	9.87384	3.43629	1	0.29777	2.94013	1.02322
00000013_4.tif	predator	IV984	d14	20.312	7.026	6.43755	8.28601	1.84846	1	0.29777	2.46732	0.550415
00000013_4.tif	predator	IV984	d14	22.422	5.391	6.43755	10.9522	4.51466	1	0.29777	3.26124	1.34433
00000013_4.tif	predator	IV984	d14	24.495	12.026	6.43755	11.009	4.57146	1	0.29777	3.27815	1.36124
00000013_4.tif	predator	IV984	d14	24.411	10.776	6.43755	10.9625	4.52495	1	0.29777	3.2643	1.3474
00000013_7.tif	predator	IV986	d34	5.37	5.984	6.27616	9.56814	3.29198	1	0.29777	2.8491	0.980252
00000013_7.tif	predator	IV986	d34	5.286	6.797	6.27616	9.31188	3.03572	1	0.29777	2.7728	0.903945
00000013_7.tif	predator	IV986	d34	5.505	7.057	6.27616	9.01341	2.73725	1	0.29777	2.68392	0.81507
00000013_7.tif	predator	IV986	d34	5.969	6.938	6.27616	8.62623	2.35007	1	0.29777	2.56863	0.69978
00000013_7.tif	predator	IV986	d34	6.703	5.635	6.27616	8.57921	2.30305	1	0.29777	2.55463	0.685778
00000013_7.tif	predator	IV986	d34	6.75	5.5	6.27616	8.61343	2.33727	1	0.29777	2.56482	0.695968
00000013_7.tif	predator	IV986	d34	4.745	8.234	6.27616	9.40667	3.13051	1	0.29777	2.80102	0.932171
00000013_7.tif	predator	IV986	d34	4.661	8.74	6.27616	9.39397	3.11781	1	0.29777	2.79724	0.92839
00000013_7.tif	predator	IV986	d34	4.344	8.812	6.27616	9.69598	3.41982	1	0.29777	2.88717	1.01832
00000013_7.tif	predator	IV986	d34	4.167	8.901	6.27616	9.85842	3.58226	1	0.29777	2.93554	1.06669
00000013_7.tif	predator	IV986	d34	5.677	10.026	6.27616	8.25818	1.98201	1	0.29777	2.45904	0.590184
00000013_7.tif	predator	IV986	d34	5.953	9.354	6.27616	8.02971	1.75355	1	0.29777	2.39101	0.522154
00000013_7.tif	predator	IV986	d34	4.021	10.781	6.27616	9.92495	3.64879	1	0.29777	2.95535	1.0865
00000013_7.tif	predator	IV986	d34	3.99	11.005	6.27616	9.97025	3.69409	1	0.29777	2.96884	1.09999
00000013_7.tif	predator	IV986	d34	5.161	12.87	6.27616	9.15252	2.87636	1	0.29777	2.72535	0.856494
00000013_7.tif	predator	IV986	d34	4.74	13.995	6.27616	9.92373	3.64757	1	0.29777	2.95499	1.08614
00000013_7.tif	predator	IV986	d34	4.734	14.083	6.27616	9.96277	3.68661	1	0.29777	2.96661	1.09776
00000013_7.tif	predator	IV986	d34	5.5	14.771	6.27616	9.56519	3.28903	1	0.29777	2.84823	0.979374
00000013_7.tif	predator	IV986	d34	5.651	14.891	6.27616	9.49039	3.21423	1	0.29777	2.82595	0.9571
00000013_7.tif	predator	IV986	d34	7.062	15.094	6.27616	8.40314	2.12698	1	0.29777	2.5022	0.633351
00000013_7.tif	predator	IV986	d34	6.615	17.615	6.27616	10.3783	4.10209	1	0.29777	3.09033	1.22148
00000013_7.tif	predator	IV986	d34	6.656	17.677	6.27616	10.3936	4.11741	1	0.29777	3.09489	1.22604
00000013_7.tif	predator	IV986	d34	7.812	18.802	6.27616	10.5122	4.236	1	0.29777	3.13021	1.26135
00000013_7.tif	predator	IV986	d34	9.182	19.208	6.27616	10.135	3.85886	1	0.29777	3.01791	1.14905
00000013_7.tif	predator	IV986	d34	9.146	19.786	6.27616	10.6652	4.389	1	0.29777	3.17577	1.30691
00000013_7.tif	predator	IV986	d34	9.396	19.729	6.27616	10.5039	4.22774	1	0.29777	3.12775	1.25889
00000013_7.tif	predator	IV986	d34	8.307	17.823	6.27616	9.42949	3.15333	1	0.29777	2.80782	0.938966
00000013_7.tif	predator	IV986	d34	8.078	16.875	6.27616	8.83706	2.5609	1	0.29777	2.63141	0.76256
00000013_7.tif	predator	IV986	d34	8.203	16.87	6.27616	8.75098	2.47482	1	0.29777	2.60578	0.736927
00000013_7.tif	predator	IV986	d34	11.688	18.859	6.27616	8.89181	2.61565	1	0.29777	2.64772	0.778863
00000013_7.tif	predator	IV986	d34	12.724	15.505	6.27616	5.38719	-0.888977	0	0.29777	1.60414	-0.264711
00000013_7.tif	predator	IV986	d34	10.844	14.755	6.27616	5.45763	-0.81853	0	0.29777	1.62512	-0.243734
00000013_7.tif	predator	IV986	d34	10.505	14.151	6.27616	5.18875	-1.08741	0	0.29777	1.54505	-0.323798
00000013_7.tif	predator	IV986	d34	8.995	11.573	6.27616	5.1099	-1.16626	0	0.29777	1.52158	-0.347277
00000013_7.tif	predator	IV986	d34	7.901	10.63	6.27616	6.04265	-0.233515	0	0.29777	1.79932	-0.0695337
00000013_7.tif	predator	IV986	d34	8.297	10.068	6.27616	5.6381	-0.63806	0	0.29777	1.67886	-0.189995
00000013_7.tif	predator	IV986	d34	7.391	6.312	6.27616	7.63753	1.36137	1	0.29777	2.27423	0.405376
00000013_7.tif	predator	IV986	d34	8.042	6.385	6.27616	7.04762	0.771462	1	0.29777	2.09857	0.229718
00000013_7.tif	predator	IV986	d34	7.323	5.458	6.27616	8.1664	1.89024	1	0.29777	2.43171	0.562856
00000013_7.tif	predator	IV986	d34	8.375	5.12	6.27616	7.56627	1.29011	1	0.29777	2.25301	0.384156
00000013_7.tif	predator	IV986	d34	8.599	4.854	6.27616	7.59024	1.31407	1	0.29777	2.26014	0.391292
00000013_7.tif	predator	IV986	d34	8.786	6.094	6.27616	6.6178	0.341635	1	0.29777	1.97058	0.101729
00000013_7.tif	predator	IV986	d34	10.479	4.865	6.27616	6.4012	0.125034	1	0.29777	1.90608	0.0372313
00000013_7.tif	predator	IV986	d34	10.49	4.698	6.27616	6.53664	0.260474	1	0.29777	1.94641	0.0775614
00000013_7.tif	predator	IV986	d34	10.068	4.089	6.27616	7.27668	1.00052	1	0.29777	2.16678	0.297924
00000013_7.tif	predator	IV986	d34	9.87	3.896	6.27616	7.54564	1.26948	1	0.29777	2.24687	0.378013
00000013_7.tif	predator	IV986	d34	10.552	3.568	6.27616	7.49269	1.21653	1	0.29777	2.2311	0.362245
00000013_7.tif	predator	IV986	d34	10.646	2.885	6.27616	8.06937	1.79321	1	0.29777	2.40282	0.533963
00000013_7.tif	predator	IV986	d34	12.807	2.401	6.27616	7.93416	1.658	1	0.29777	2.36256	0.493703
00000013_7.tif	predator	IV986	d34	12.688	2.354	6.27616	7.99833	1.72217	1	0.29777	2.38166	0.512811
00000013_7.tif	predator	IV986	d34	13.021	15.875	6.27616	5.69336	-0.582805	0	0.29777	1.69531	-0.173542
00000013_7.tif	predator	IV986	d34	13.234	19	6.27616	8.77281	2.49665	1	0.29777	2.61228	0.743427
00000013_7.tif	predator	IV986	d34	13.375	19.021	6.27616	8.78368	2.50752	1	0.29777	2.61552	0.746663
00000013_7.tif	predator	IV986	d34	13.38	18.849	6.27616	8.61171	2.33555	1	0.29777	2.56431	0.695456
00000013_7.tif	predator	IV986	d34	15.099	18.589	6.27616	8.41531	2.13915	1	0.29777	2.50583	0.636974
00000013_7.tif	predator	IV986	d34	22.271	16.458	6.27616	10.3931	4.11692	1	0.29777	3.09475	1.22589
00000013_7.tif	predator	IV986	d34	21.552	16.812	6.27616	10.0528	3.77663	1	0.29777	2.99342	1.12457
00000013_7.tif	predator	IV986	d34	20.776	16.714	6.27616	9.41058	3.13442	1	0.29777	2.80219	0.933336
00000013_7.tif	predator	IV986	d34	20.177	16.146	6.27616	8.5851	2.30894	1	0.29777	2.55638	0.687532
00000013_7.tif	predator	IV986	d34	20.078	16	6.27616	8.41299	2.13682	1	0.29777	2.50513	0.636282
00000013_7.tif	predator	IV986	d34	20.141	13.948	6.27616	7.22426	0.948098	1	0.29777	2.15117	0.282315
00000013_7.tif	predator	IV986	d34	20.406	13.568	6.27616	7.27246	0.996296	1	0.29777	2.16552	0.296667
00000013_7.tif	predator	IV986	d34	19.75	13.37	6.27616	6.59942	0.323258	1	0.29777	1.96511	0.0962566
00000013_7.tif	predator	IV986	d34	21.432	14.432	6.27616	8.58471	2.30855	1	0.29777	2.55627	0.687418
00000013_7.tif	predator	IV986	d34	21.5	14.24	6.27616	8.55306	2.2769	1	0.29777	2.54684	0.677992
00000013_7.tif	predator	IV986	d34	21.583	14.349	6.27616	8.67748	2.40132	1	0.29777	2.58389	0.71504
00000013_7.tif	predator	IV986	d34	21.448	14.031	6.27616	8.41121	2.13505	1	0.29777	2.50461	0.635753
00000013_7.tif	predator	IV986	d34	21.062	12.714	6.27616	7.54212	1.26596	1	0.29777	2.24582	0.376964
00000013_7.tif	predator	IV986	d34	20.828	12.542	6.27616	7.26534	0.989179	1	0.29777	2.1634	0.294548
00000013_7.tif	predator	IV986	d34	20.521	12.401	6.27616	6.92966	0.653501	1	0.29777	2.06345	0.194593
00000013_7.tif	predator	IV986	d34	20.469	12.172	6.27616	6.81229	0.536125	1	0.29777	2.02849	0.159642
00000013_7.tif	predator	IV986	d34	20.188	11.089	6.27616	6.31135	0.0351841	1	0.29777	1.87933	0.0104768
00000013_7.tif	predator	IV986	d34	19.995	11	6.27616	6.1086	-0.167562	0	0.29777	1.81896	-0.049895
00000013_7.tif	predator	IV986	d34	20.245	9.536	6.27616	6.35381	0.0776501	1	0.29777	1.89197	0.0231219
00000013_7.tif	predator	IV986	d34	20.406	9.583	6.27616	6.50878	0.232621	1	0.29777	1.93812	0.0692676
00000013_7.tif	predator	IV986	d34	21.469	9.615	6.27616	7.56412	1.28796	1	0.29777	2.25237	0.383516
00000013_7.tif	predator	IV986	d34	21.615	9.385	6.27616	7.7321	1.45594	1	0.29777	2.30239	0.433535
00000013_7.tif	predator	IV986	d34	21.714	9.24	6.27616	7.84791	1.57175	1	0.29777	2.33687	0.46802
00000013_7.tif	predator	IV986	d34	22.057	9.958	6.27616	8.13043	1.85426	1	0.29777	2.421	0.552144
00000013_7.tif	predator	IV986	d34	22.24	10.302	6.27616	8.30813	2.03197	1	0.29777	2.47391	0.60506
00000013_7.tif	predator	IV986	d34	22.344	10.266	6.27616	8.41201	2.13585	1	0.29777	2.50484	0.635991
00000013_7.tif	predator	IV986	d34	22.656	9.911	6.27616	8.73078	2.45462	1	0.29777	2.59976	0.730911
00000013_7.tif	predator	IV986	d34	22.859	10.042	6.27616	8.92954	2.65338	1	0.29777	2.65895	0.790097
00000013_7.tif	predator	IV986	d34	22.995	9.979	6.27616	9.0672	2.79104	1	0.29777	2.69994	0.831088
00000013_7.tif	predator	IV986	d34	23.328	10.141	6.27616	9.39669	3.12053	1	0.29777	2.79805	0.9292
00000013_7.tif	predator	IV986	d34	23.245	9.271	6.27616	9.36484	3.08868	1	0.29777	2.78857	0.919716
00000013_7.tif	predator	IV986	d34	23.432	8.922	6.27616	9.59306	3.3169	1	0.29777	2.85653	0.987674
00000013_7.tif	predator	IV986	d34	23.328	8.672	6.27616	9.52842	3.25225	1	0.29777	2.83728	0.968424
00000013_7.tif	predator	IV986	d34	23.292	8.557	6.27616	9.51277	3.23661	1	0.29777	2.83262	0.963765
00000013_7.tif	predator	IV986	d34	23.479	8.516	6.27616	9.70409	3.42793	1	0.29777	2.88959	1.02073
00000013_7.tif	predator	IV986	d34	21.193	7.625	6.27616	7.72263	1.44647	1	0.29777	2.29957	0.430715
00000013_7.tif	predator	IV986	d34	21.625	7.438	6.27616	8.19254	1.91638	1	0.29777	2.43949	0.57064
00000013_7.tif	predator	IV986	d34	21.115	7.318	6.27616	7.76025	1.48409	1	0.29777	2.31077	0.441916
00000013_7.tif	predator	IV986	d34	22.151	6.865	6.27616	8.89067	2.61451	1	0.29777	2.64738	0.778523
00000013_7.tif	predator	IV986	d34	21.656	5.938	6.27616	8.84854	2.57238	1	0.29777	2.63483	0.765977
00000013_7.tif	predator	IV986	d34	20.635	5.13	6.27616	8.43776	2.1616	1	0.29777	2.51251	0.64366
00000013_7.tif	predator	IV986	d34	20.896	4.974	6.27616	8.73992	2.46376	1	0.29777	2.60249	0.733634
00000013_7.tif	predator	IV986	d34	21.745	4.661	6.27616	9.60915	3.33299	1	0.29777	2.86132	0.992464
00000013_7.tif	predator	IV986	d34	21.865	4.635	6.27616	9.72198	3.44582	1	0.29777	2.89491	1.02606
00000013_7.tif	predator	IV986	d34	20.12	3.359	6.27616	9.26532	2.98916	1	0.29777	2.75893	0.890082
0000013_11.tif	predator	LX704	d23	7.057	7.677	6.05223	8.84395	2.79172	1	0.29777	2.63346	0.83129
0000013_11.tif	predator	LX704	d23	6.26	8.005	6.05223	9.44416	3.39193	1	0.29777	2.81219	1.01002
0000013_11.tif	predator	LX704	d23	5.958	8.177	6.05223	9.66552	3.61329	1	0.29777	2.8781	1.07593
0000013_11.tif	predator	LX704	d23	5.562	8.177	6.05223	10.0386	3.98637	1	0.29777	2.9892	1.18702
0000013_11.tif	predator	LX704	d23	5.865	8.438	6.05223	9.66773	3.6155	1	0.29777	2.87876	1.07659
0000013_11.tif	predator	LX704	d23	5.63	10.443	6.05223	9.46885	3.41661	1	0.29777	2.81954	1.01737
0000013_11.tif	predator	LX704	d23	5.682	10.641	6.05223	9.39744	3.34521	1	0.29777	2.79828	0.996102
0000013_11.tif	predator	LX704	d23	6.219	11.771	6.05223	8.82783	2.7756	1	0.29777	2.62866	0.82649
0000013_11.tif	predator	LX704	d23	6.74	11.896	6.05223	8.31247	2.26023	1	0.29777	2.4752	0.67303
0000013_11.tif	predator	LX704	d23	7.031	12.677	6.05223	8.10008	2.04785	1	0.29777	2.41196	0.609788
0000013_11.tif	predator	LX704	d23	6.885	12.818	6.05223	8.26617	2.21394	1	0.29777	2.46142	0.659244
0000013_11.tif	predator	LX704	d23	4.958	12.818	6.05223	10.1725	4.12028	1	0.29777	3.02907	1.2269
0000013_11.tif	predator	LX704	d23	6.859	14.552	6.05223	8.74098	2.68875	1	0.29777	2.6028	0.80063
0000013_11.tif	predator	LX704	d23	6.688	15.062	6.05223	9.08995	3.03772	1	0.29777	2.70671	0.904542
0000013_11.tif	predator	LX704	d23	6.318	15.755	6.05223	9.71557	3.66334	1	0.29777	2.89301	1.09083
0000013_11.tif	predator	LX704	d23	6.948	15.724	6.05223	9.13963	3.0874	1	0.29777	2.72151	0.919335
0000013_11.tif	predator	LX704	d23	6.667	16.484	6.05223	9.75657	3.70434	1	0.29777	2.90521	1.10304
0000013_11.tif	predator	LX704	d23	6.391	16.62	6.05223	10.0633	4.01105	1	0.29777	2.99654	1.19437
0000013_11.tif	predator	LX704	d23	6.938	18.51	6.05223	10.7289	4.67669	1	0.29777	3.19475	1.39258
0000013_11.tif	predator	LX704	d23	7.021	18.417	6.05223	10.6053	4.55306	1	0.29777	3.15794	1.35577
0000013_11.tif	predator	LX704	d23	7.292	18.526	6.05223	10.4749	4.42263	1	0.29777	3.1191	1.31693
0000013_11.tif	predator	LX704	d23	7.495	18.438	6.05223	10.2657	4.21348	1	0.29777	3.05682	1.25465
0000013_11.tif	predator	LX704	d23	7.01	17.297	6.05223	9.91777	3.86554	1	0.29777	2.95321	1.15104
0000013_11.tif	predator	LX704	d23	10.885	17.729	6.05223	7.50621	1.45398	1	0.29777	2.23512	0.43295
0000013_11.tif	predator	LX704	d23	10.13	16.177	6.05223	6.79698	0.744749	1	0.29777	2.02394	0.221764
0000013_11.tif	predator	LX704	d23	9.99	16.161	6.05223	6.88795	0.835716	1	0.29777	2.05102	0.248851
0000013_11.tif	predator	LX704	d23	7.807	15.896	6.05223	8.47674	2.42451	1	0.29777	2.52412	0.721946
0000013_11.tif	predator	LX704	d23	7.766	15.589	6.05223	8.35657	2.30434	1	0.29777	2.48834	0.686163
0000013_11.tif	predator	LX704	d23	7.479	14.849	6.05223	8.27985	2.22762	1	0.29777	2.46549	0.663317
0000013_11.tif	predator	LX704	d23	7.286	14.224	6.05223	8.22743	2.1752	1	0.29777	2.44988	0.647708
0000013_11.tif	predator	LX704	d23	7.391	13.578	6.05223	7.9337	1.88147	1	0.29777	2.36242	0.560245
0000013_11.tif	predator	LX704	d23	7.812	9.802	6.05223	7.42194	1.36971	1	0.29777	2.21003	0.407859
0000013_11.tif	predator	LX704	d23	7.568	9.349	6.05223	7.77159	1.71936	1	0.29777	2.31415	0.511973
0000013_11.tif	predator	LX704	d23	7.995	8.172	6.05223	7.78437	1.73214	1	0.29777	2.31795	0.51578
0000013_11.tif	predator	LX704	d23	10.948	5.406	6.05223	7.32408	1.27185	1	0.29777	2.18089	0.378719
0000013_11.tif	predator	LX704	d23	10.995	5.307	6.05223	7.3805	1.32827	1	0.29777	2.19769	0.395519
0000013_11.tif	predator	LX704	d23	8.266	4.271	6.05223	9.8929	3.84067	1	0.29777	2.94581	1.14364
0000013_11.tif	predator	LX704	d23	8.526	4.255	6.05223	9.72854	3.67631	1	0.29777	2.89687	1.09469
0000013_11.tif	predator	LX704	d23	8.5	4.089	6.05223	9.86964	3.81741	1	0.29777	2.93888	1.13671
0000013_11.tif	predator	LX704	d23	8.677	4.042	6.05223	9.78888	3.73665	1	0.29777	2.91484	1.11266
0000013_11.tif	predator	LX704	d23	11.12	3.734	6.05223	8.68142	2.62919	1	0.29777	2.58507	0.782894
0000013_11.tif	predator	LX704	d23	11.182	3.521	6.05223	8.84474	2.7925	1	0.29777	2.6337	0.831524
0000013_11.tif	predator	LX704	d23	11.328	4.547	6.05223	7.86425	1.81202	1	0.29777	2.34174	0.539564
0000013_11.tif	predator	LX704	d23	10.823	2.891	6.05223	9.56837	3.51614	1	0.29777	2.84917	1.047
0000013_11.tif	predator	LX704	d23	15.688	2.755	6.05223	8.74789	2.69565	1	0.29777	2.60486	0.802685
0000013_11.tif	predator	LX704	d23	11.411	4.745	6.05223	7.65055	1.59832	1	0.29777	2.2781	0.475931
0000013_11.tif	predator	LX704	d23	10.339	8.01	6.05223	5.84399	-0.208246	0	0.29777	1.74016	-0.0620094
0000013_11.tif	predator	LX704	d23	15.375	16.76	6.05223	5.29149	-0.760743	0	0.29777	1.57565	-0.226527
0000013_11.tif	predator	LX704	d23	11.906	17.906	6.05223	7.15128	1.09905	1	0.29777	2.12944	0.327264
0000013_11.tif	predator	LX704	d23	12.411	18.333	6.05223	7.34163	1.28939	1	0.29777	2.18612	0.383943
0000013_11.tif	predator	LX704	d23	12.474	18.302	6.05223	7.29026	1.23803	1	0.29777	2.17082	0.368649
0000013_11.tif	predator	LX704	d23	12.281	18.865	6.05223	7.88518	1.83295	1	0.29777	2.34797	0.545798
0000013_11.tif	predator	LX704	d23	13.151	18.354	6.05223	7.13032	1.07809	1	0.29777	2.1232	0.321023
0000013_11.tif	predator	LX704	d23	15.495	18.745	6.05223	7.28011	1.22788	1	0.29777	2.1678	0.365625
0000013_11.tif	predator	LX704	d23	15.719	18.812	6.05223	7.36418	1.31195	1	0.29777	2.19283	0.39066
0000013_11.tif	predator	LX704	d23	15.969	18.542	6.05223	7.12357	1.07134	1	0.29777	2.12119	0.319013
0000013_11.tif	predator	LX704	d23	11.927	19.729	6.05223	8.81849	2.76626	1	0.29777	2.62588	0.823708
0000013_11.tif	predator	LX704	d23	11.969	20.245	6.05223	9.28903	3.2368	1	0.29777	2.76599	0.963821
0000013_11.tif	predator	LX704	d23	11.578	20.443	6.05223	9.61003	3.55779	1	0.29777	2.86158	1.0594
0000013_11.tif	predator	LX704	d23	12.104	20.172	6.05223	9.17606	3.12383	1	0.29777	2.73236	0.930183
0000013_11.tif	predator	LX704	d23	14.323	19.672	6.05223	8.22449	2.17226	1	0.29777	2.44901	0.646833
0000013_11.tif	predator	LX704	d23	14.281	19.901	6.05223	8.45631	2.40408	1	0.29777	2.51804	0.715863
0000013_11.tif	predator	LX704	d23	14.839	20.042	6.05223	8.56541	2.51317	1	0.29777	2.55052	0.748348
0000013_11.tif	predator	LX704	d23	12.984	21.38	6.05223	10.1126	4.06039	1	0.29777	3.01124	1.20906
0000013_11.tif	predator	LX704	d23	13.141	21.276	6.05223	9.97973	3.9275	1	0.29777	2.97166	1.16949
0000013_11.tif	predator	LX704	d23	13.109	21.042	6.05223	9.75641	3.70417	1	0.29777	2.90517	1.10299
[truncated: 20,262 more rows]
