# Supplementary material for: Dopamine signaling regulates predator-driven changes in Caenorhabditis elegans’ egg laying behavior
Source: eLife. 2023 Jul 11;12:e83957. doi: 10.7554/eLife.83957 (PMC10335835; doi:10.7554/eLife.83957)
Supplement: Figure 9—source data 2. — For each test arena, data tabulate the arena, predator exposure condition, genotype, <x,y> coordinates in pixels, lawn radius in pixels, the egg distance from arena center in pixels, the egg distance from lawn edge in pixels, position as 1 (off) or 0 (on) lawn, the conversion factor for pixel data in mm-per-pixel, the calculated distance from center in mm, the calculated distance from the lawn edge in mm. [file elife-83957-fig9-data2.xlsx]

## Sheet: Figure9D-F
Arena	Condition	Strain	Genotype	X	Y	LawnRadius	DistCenterPx	DistEdgePx	off	PxScale	DistCenterMm	DistEdgeMm
0000000_40.tif	predator	N2	wt	5.052	8.573	6.63538	9.29236	2.65698	1	0.29777	2.76699	0.791168
0000000_40.tif	predator	N2	wt	5.054	8.911	6.63538	9.18116	2.54578	1	0.29777	2.73388	0.758057
0000000_40.tif	predator	N2	wt	6.082	8.21	6.63538	8.47511	1.83973	1	0.29777	2.52363	0.547815
0000000_40.tif	predator	N2	wt	6.269	8.411	6.63538	8.2222	1.58682	1	0.29777	2.44833	0.472508
0000000_40.tif	predator	N2	wt	8.012	7.148	6.63538	7.37523	0.739843	1	0.29777	2.19612	0.220303
0000000_40.tif	predator	N2	wt	8.04	7.349	6.63538	7.22979	0.59441	1	0.29777	2.15282	0.176997
0000000_40.tif	predator	N2	wt	5.741	10.259	6.63538	8.1841	1.54872	1	0.29777	2.43698	0.461162
0000000_40.tif	predator	N2	wt	5.929	10.446	6.63538	7.96699	1.3316	1	0.29777	2.37233	0.396511
0000000_40.tif	predator	N2	wt	7.776	11.113	6.63538	6.04746	-0.587928	0	0.29777	1.80075	-0.175067
0000000_40.tif	predator	N2	wt	8.45	12.814	6.63538	5.45107	-1.18431	0	0.29777	1.62317	-0.352652
0000000_40.tif	predator	N2	wt	4.852	14.13	6.63538	9.2568	2.62142	1	0.29777	2.7564	0.78058
0000000_40.tif	predator	N2	wt	4.929	14.123	6.63538	9.18063	2.54525	1	0.29777	2.73372	0.757899
0000000_40.tif	predator	N2	wt	5.054	15.71	6.63538	9.60214	2.96675	1	0.29777	2.85923	0.88341
0000000_40.tif	predator	N2	wt	6.575	17.47	6.63538	9.22194	2.58656	1	0.29777	2.74602	0.770199
0000000_40.tif	predator	N2	wt	7.318	17.352	6.63538	8.57501	1.93963	1	0.29777	2.55338	0.577563
0000000_40.tif	predator	N2	wt	7.255	17.193	6.63538	8.51984	1.88446	1	0.29777	2.53695	0.561135
0000000_40.tif	predator	N2	wt	7.373	17.179	6.63538	8.42057	1.78519	1	0.29777	2.50739	0.531576
0000000_40.tif	predator	N2	wt	7.262	18.29	6.63538	9.25676	2.62138	1	0.29777	2.75639	0.780568
0000000_40.tif	predator	N2	wt	7.818	18.408	6.63538	8.9609	2.32552	1	0.29777	2.66829	0.692469
0000000_40.tif	predator	N2	wt	7.943	17.977	6.63538	8.55852	1.92314	1	0.29777	2.54847	0.572653
0000000_40.tif	predator	N2	wt	8.248	17.964	6.63538	8.34333	1.70795	1	0.29777	2.48439	0.508576
0000000_40.tif	predator	N2	wt	10.79	21.141	6.63538	9.87916	3.24377	1	0.29777	2.94172	0.965899
0000000_40.tif	predator	N2	wt	10.54	20.286	6.63538	9.15411	2.51873	1	0.29777	2.72582	0.750002
0000000_40.tif	predator	N2	wt	10.179	19.814	6.63538	8.85556	2.22018	1	0.29777	2.63692	0.661103
0000000_40.tif	predator	N2	wt	10.179	19.814	6.63538	8.85556	2.22018	1	0.29777	2.63692	0.661103
0000000_40.tif	predator	N2	wt	10.429	19.481	6.63538	8.45005	1.81466	1	0.29777	2.51617	0.540352
0000000_40.tif	predator	N2	wt	11.102	19.411	6.63538	8.13936	1.50398	1	0.29777	2.42366	0.44784
0000000_40.tif	predator	N2	wt	12.047	18.481	6.63538	6.97385	0.338463	1	0.29777	2.0766	0.100784
0000000_40.tif	predator	N2	wt	13.457	18.245	6.63538	6.52461	-0.110777	0	0.29777	1.94283	-0.0329861
0000000_40.tif	predator	N2	wt	9.464	19.363	6.63538	8.77551	2.14013	1	0.29777	2.61308	0.637265
0000000_40.tif	predator	N2	wt	9.748	19.689	6.63538	8.92836	2.29297	1	0.29777	2.6586	0.682779
0000000_40.tif	predator	N2	wt	9.686	19.821	6.63538	9.07412	2.43874	1	0.29777	2.702	0.726184
0000000_40.tif	predator	N2	wt	9.332	16.457	6.63538	6.49966	-0.135723	0	0.29777	1.9354	-0.0404141
0000000_40.tif	predator	N2	wt	8.95	14.099	6.63538	5.39091	-1.24448	0	0.29777	1.60525	-0.370568
0000000_40.tif	predator	N2	wt	9.429	13.668	6.63538	4.77446	-1.86092	0	0.29777	1.42169	-0.554126
0000000_40.tif	predator	N2	wt	9.845	14.8	6.63538	5.00098	-1.6344	0	0.29777	1.48914	-0.486675
0000000_40.tif	predator	N2	wt	10.373	14.905	6.63538	4.66653	-1.96885	0	0.29777	1.38955	-0.586264
0000000_40.tif	predator	N2	wt	10.325	14.696	6.63538	4.56324	-2.07214	0	0.29777	1.3588	-0.617021
0000000_40.tif	predator	N2	wt	11.095	13.738	6.63538	3.36302	-3.27236	0	0.29777	1.00141	-0.974412
0000000_40.tif	predator	N2	wt	10.866	13.196	6.63538	3.27316	-3.36222	0	0.29777	0.974648	-1.00117
0000000_40.tif	predator	N2	wt	11.72	13.064	6.63538	2.46483	-4.17055	0	0.29777	0.733954	-1.24186
0000000_40.tif	predator	N2	wt	12.436	13.536	6.63538	2.2592	-4.37618	0	0.29777	0.672722	-1.3031
0000000_40.tif	predator	N2	wt	10.047	10.04	6.63538	4.10825	-2.52713	0	0.29777	1.22331	-0.752503
0000000_40.tif	predator	N2	wt	10.977	9.741	6.63538	3.44621	-3.18917	0	0.29777	1.02618	-0.94964
0000000_40.tif	predator	N2	wt	9.262	5.637	6.63538	7.59166	0.956281	1	0.29777	2.26057	0.284752
0000000_40.tif	predator	N2	wt	10.332	5.63	6.63538	7.01209	0.376707	1	0.29777	2.08799	0.112172
0000000_40.tif	predator	N2	wt	10.339	5.45	6.63538	7.16583	0.530442	1	0.29777	2.13377	0.15795
0000000_40.tif	predator	N2	wt	10.186	6.977	6.63538	5.96529	-0.670088	0	0.29777	1.77629	-0.199532
0000000_40.tif	predator	N2	wt	10.227	6.651	6.63538	6.20446	-0.430924	0	0.29777	1.8475	-0.128316
0000000_40.tif	predator	N2	wt	10.616	6.859	6.63538	5.81411	-0.821273	0	0.29777	1.73127	-0.24455
0000000_40.tif	predator	N2	wt	10.616	6.714	6.63538	5.93609	-0.69929	0	0.29777	1.76759	-0.208228
0000000_40.tif	predator	N2	wt	10.408	7.255	6.63538	5.60965	-1.02574	0	0.29777	1.67038	-0.305434
0000000_40.tif	predator	N2	wt	12.38	6.964	6.63538	4.96981	-1.66558	0	0.29777	1.47986	-0.495959
0000000_40.tif	predator	N2	wt	12.38	6.686	6.63538	5.23695	-1.39844	0	0.29777	1.55941	-0.416413
0000000_40.tif	predator	N2	wt	12.575	6.498	6.63538	5.3707	-1.26468	0	0.29777	1.59923	-0.376584
0000000_40.tif	predator	N2	wt	14.089	6.012	6.63538	5.72471	-0.910673	0	0.29777	1.70465	-0.271171
0000000_40.tif	predator	N2	wt	13.825	5.693	6.63538	6.03609	-0.599293	0	0.29777	1.79737	-0.178451
0000000_40.tif	predator	N2	wt	12.29	5.658	6.63538	6.25404	-0.381341	0	0.29777	1.86227	-0.113552
0000000_40.tif	predator	N2	wt	12.116	5.255	6.63538	6.68742	0.0520421	1	0.29777	1.99131	0.0154966
0000000_40.tif	predator	N2	wt	11.977	4.894	6.63538	7.07188	0.436495	1	0.29777	2.10579	0.129975
0000000_40.tif	predator	N2	wt	10.776	3.207	6.63538	9.03995	2.40457	1	0.29777	2.69183	0.716009
0000000_40.tif	predator	N2	wt	10.894	3.061	6.63538	9.13962	2.50424	1	0.29777	2.7215	0.745686
0000000_40.tif	predator	N2	wt	9.241	3.075	6.63538	9.77769	3.14231	1	0.29777	2.9115	0.935686
0000000_40.tif	predator	N2	wt	12.769	2.214	6.63538	9.56984	2.93445	1	0.29777	2.84961	0.873792
0000000_40.tif	predator	N2	wt	12.63	2.109	6.63538	9.68992	3.05454	1	0.29777	2.88537	0.909551
0000000_40.tif	predator	N2	wt	15.439	2.898	6.63538	8.98327	2.34789	1	0.29777	2.67495	0.699131
0000000_40.tif	predator	N2	wt	15.828	2.689	6.63538	9.26644	2.63106	1	0.29777	2.75927	0.78345
0000000_40.tif	predator	N2	wt	18.988	3.96	6.63538	9.34643	2.71105	1	0.29777	2.78309	0.807269
0000000_40.tif	predator	N2	wt	14.613	5.314	6.63538	6.46732	-0.16806	0	0.29777	1.92577	-0.0500432
0000000_40.tif	predator	N2	wt	14.717	5.467	6.63538	6.32995	-0.305433	0	0.29777	1.88487	-0.0909487
0000000_40.tif	predator	N2	wt	14.793	5.064	6.63538	6.73975	0.104367	1	0.29777	2.0069	0.0310773
0000000_40.tif	predator	N2	wt	15.043	5.474	6.63538	6.37887	-0.256509	0	0.29777	1.89944	-0.0763808
0000000_40.tif	predator	N2	wt	16.46	5.286	6.63538	6.97356	0.338172	1	0.29777	2.07652	0.100698
0000000_40.tif	predator	N2	wt	19.224	5.724	6.63538	8.09732	1.46194	1	0.29777	2.41114	0.435322
0000000_40.tif	predator	N2	wt	18.918	6.071	6.63538	7.63471	0.99933	1	0.29777	2.27339	0.29757
0000000_40.tif	predator	N2	wt	18.8	7.175	6.63538	6.76897	0.133589	1	0.29777	2.0156	0.0397788
0000000_40.tif	predator	N2	wt	18.641	7.155	6.63538	6.6659	0.0305212	1	0.29777	1.98491	0.00908831
0000000_40.tif	predator	N2	wt	17.168	7.099	6.63538	5.73012	-0.905263	0	0.29777	1.70626	-0.26956
0000000_40.tif	predator	N2	wt	16.571	6.689	6.63538	5.75538	-0.879999	0	0.29777	1.71378	-0.262037
0000000_40.tif	predator	N2	wt	15.863	7.155	6.63538	5.02101	-1.61438	0	0.29777	1.49511	-0.480713
0000000_40.tif	predator	N2	wt	15.849	9.582	6.63538	2.97336	-3.66202	0	0.29777	0.885377	-1.09044
0000000_40.tif	predator	N2	wt	16.12	11.665	6.63538	2.32888	-4.3065	0	0.29777	0.69347	-1.28235
0000000_40.tif	predator	N2	wt	16.432	12.068	6.63538	2.66168	-3.97371	0	0.29777	0.792567	-1.18325
0000000_40.tif	predator	N2	wt	15.106	14.439	6.63538	3.01176	-3.62362	0	0.29777	0.896812	-1.07901
0000000_40.tif	predator	N2	wt	14.745	14.641	6.63538	3.06398	-3.57141	0	0.29777	0.91236	-1.06346
0000000_40.tif	predator	N2	wt	16.182	16.585	6.63538	5.41229	-1.2231	0	0.29777	1.61162	-0.364202
0000000_40.tif	predator	N2	wt	16.071	16.634	6.63538	5.40859	-1.22679	0	0.29777	1.61052	-0.365302
0000000_40.tif	predator	N2	wt	18.252	17.464	6.63538	7.26511	0.629727	1	0.29777	2.16333	0.187514
0000000_40.tif	predator	N2	wt	18.953	18.648	6.63538	8.63183	1.99645	1	0.29777	2.5703	0.594482
0000000_40.tif	predator	N2	wt	18.46	19.325	6.63538	8.91569	2.2803	1	0.29777	2.65482	0.679006
0000000_40.tif	predator	N2	wt	18.106	19.693	6.63538	9.05737	2.42198	1	0.29777	2.69701	0.721194
0000000_40.tif	predator	N2	wt	16.342	19.276	6.63538	7.96616	1.33078	1	0.29777	2.37208	0.396266
0000000_40.tif	predator	N2	wt	15.8	20.477	6.63538	8.9755	2.34012	1	0.29777	2.67263	0.696816
0000000_40.tif	predator	N2	wt	20.87	18.036	6.63538	9.48031	2.84493	1	0.29777	2.82295	0.847135
0000000_40.tif	predator	N2	wt	19.905	16.863	6.63538	7.9829	1.34752	1	0.29777	2.37707	0.401251
0000000_40.tif	predator	N2	wt	20.085	16.807	6.63538	8.08628	1.4509	1	0.29777	2.40785	0.432034
0000000_40.tif	predator	N2	wt	22.168	16.87	6.63538	9.82788	3.1925	1	0.29777	2.92645	0.95063
0000000_40.tif	predator	N2	wt	22.092	16.807	6.63538	9.73016	3.09478	1	0.29777	2.89735	0.921533
0000000_40.tif	predator	N2	wt	22.405	16.585	6.63538	9.88759	3.25221	1	0.29777	2.94423	0.968411
0000000_40.tif	predator	N2	wt	21.835	15.995	6.63538	9.10432	2.46894	1	0.29777	2.71099	0.735175
0000000_40.tif	predator	N2	wt	21.148	15.828	6.63538	8.42096	1.78558	1	0.29777	2.50751	0.531691
0000000_40.tif	predator	N2	wt	21.196	15.634	6.63538	8.37068	1.73529	1	0.29777	2.49254	0.516719
0000000_40.tif	predator	N2	wt	21.28	15.682	6.63538	8.46737	1.83199	1	0.29777	2.52133	0.545511
0000000_40.tif	predator	N2	wt	21.8	13.262	6.63538	8.15341	1.51803	1	0.29777	2.42784	0.452024
0000000_40.tif	predator	N2	wt	21.002	13.082	6.63538	7.33585	0.700468	1	0.29777	2.1844	0.208578
0000000_40.tif	predator	N2	wt	21.488	12.915	6.63538	7.78685	1.15147	1	0.29777	2.31869	0.342872
0000000_40.tif	predator	N2	wt	22.613	12.009	6.63538	8.82544	2.19006	1	0.29777	2.62795	0.652134
0000000_40.tif	predator	N2	wt	22.953	11.009	6.63538	9.18925	2.55387	1	0.29777	2.73628	0.760465
0000000_40.tif	predator	N2	wt	23.918	10.905	6.63538	10.1595	3.52409	1	0.29777	3.02519	1.04937
0000000_40.tif	predator	N2	wt	23.905	11.314	6.63538	10.1215	3.48613	1	0.29777	3.01388	1.03806
0000000_40.tif	predator	N2	wt	22.592	8.043	6.63538	9.54079	2.9054	1	0.29777	2.84096	0.865142
0000000_40.tif	predator	N2	wt	24.127	9.148	6.63538	10.6524	4.01702	1	0.29777	3.17197	1.19615
0000000_40.tif	predator	N2	wt	20.585	7.509	6.63538	7.99708	1.36169	1	0.29777	2.38129	0.405472
0000000_40.tif	predator	N2	wt	20.071	7.405	6.63538	7.62383	0.988449	1	0.29777	2.27015	0.294331
0000000_40.tif	predator	N2	wt	19.988	7.523	6.63538	7.48871	0.853332	1	0.29777	2.22991	0.254097
0000000_40.tif	predator	N2	wt	19.717	7.023	6.63538	7.56651	0.931126	1	0.29777	2.25308	0.277261
0000000_40.tif	predator	N2	wt	19.648	6.842	6.63538	7.62729	0.991904	1	0.29777	2.27118	0.295359
0000000_40.tif	predator	N2	wt	19.689	6.377	6.63538	7.96357	1.32819	1	0.29777	2.37131	0.395496
0000000_40.tif	predator	N2	wt	22.231	6.53	6.63538	9.91193	3.27655	1	0.29777	2.95147	0.975657
0000000_40.tif	predator	N2	wt	24.641	12.786	6.63538	10.9004	4.26499	1	0.29777	3.2458	1.26999
0000000_40.tif	predator	N2	wt	24.682	12.589	6.63538	10.9239	4.28852	1	0.29777	3.25281	1.27699
0000002_30.tif	predator	LX734	d123	7.698	18.365	6.24487	9.67329	3.42842	1	0.29777	2.88042	1.02088
0000002_30.tif	predator	LX734	d123	8.043	18.182	6.24487	9.31409	3.06922	1	0.29777	2.77346	0.913923
0000002_30.tif	predator	LX734	d123	6.995	17.127	6.24487	9.25894	3.01408	1	0.29777	2.75704	0.897501
0000002_30.tif	predator	LX734	d123	6.717	16.481	6.24487	9.05378	2.80892	1	0.29777	2.69594	0.836411
0000002_30.tif	predator	LX734	d123	6.918	15.939	6.24487	8.56636	2.32149	1	0.29777	2.55081	0.691271
0000002_30.tif	predator	LX734	d123	7.384	16.321	6.24487	8.43516	2.19029	1	0.29777	2.51174	0.652203
0000002_30.tif	predator	LX734	d123	9.05	15.925	6.24487	6.94807	0.703202	1	0.29777	2.06893	0.209393
0000002_30.tif	predator	LX734	d123	9.113	15.411	6.24487	6.53953	0.294664	1	0.29777	1.94728	0.0877421
0000002_30.tif	predator	LX734	d123	8.432	15.245	6.24487	6.94212	0.697248	1	0.29777	2.06715	0.207619
0000002_30.tif	predator	LX734	d123	8.766	14.599	6.24487	6.28368	0.038809	1	0.29777	1.87109	0.0115562
0000002_30.tif	predator	LX734	d123	8.064	14.356	6.24487	6.73475	0.489882	1	0.29777	2.00541	0.145872
0000002_30.tif	predator	LX734	d123	9.106	13.012	6.24487	5.18651	-1.05835	0	0.29777	1.54439	-0.315146
0000002_30.tif	predator	LX734	d123	8.418	13.089	6.24487	5.84965	-0.395214	0	0.29777	1.74185	-0.117683
0000002_30.tif	predator	LX734	d123	5.516	10.328	6.24487	8.34202	2.09715	1	0.29777	2.484	0.624469
0000002_30.tif	predator	LX734	d123	6.099	10.703	6.24487	7.74228	1.49742	1	0.29777	2.30542	0.445885
0000002_30.tif	predator	LX734	d123	6.148	11.238	6.24487	7.69882	1.45396	1	0.29777	2.29248	0.432945
0000002_30.tif	predator	LX734	d123	6.474	10.203	6.24487	7.39706	1.1522	1	0.29777	2.20262	0.34309
0000002_30.tif	predator	LX734	d123	6.37	9.981	6.24487	7.52423	1.27936	1	0.29777	2.24049	0.380956
0000002_30.tif	predator	LX734	d123	9.342	10.05	6.24487	4.57496	-1.6699	0	0.29777	1.36229	-0.497247
0000002_30.tif	predator	LX734	d123	9.606	9.731	6.24487	4.38906	-1.8558	0	0.29777	1.30693	-0.552602
0000002_30.tif	predator	LX734	d123	9.488	9.599	6.24487	4.53877	-1.70609	0	0.29777	1.35151	-0.508024
0000002_30.tif	predator	LX734	d123	9.759	9.286	6.24487	4.38434	-1.86053	0	0.29777	1.30552	-0.55401
0000002_30.tif	predator	LX734	d123	9.62	9.203	6.24487	4.54415	-1.70072	0	0.29777	1.35311	-0.506423
0000002_30.tif	predator	LX734	d123	8.807	9.259	6.24487	5.29003	-0.954835	0	0.29777	1.57521	-0.284321
0000002_30.tif	predator	LX734	d123	8.995	8.578	6.24487	5.3679	-0.876972	0	0.29777	1.5984	-0.261136
0000002_30.tif	predator	LX734	d123	12.3	2.918	6.24487	8.12018	1.87531	1	0.29777	2.41794	0.55841
0000002_30.tif	predator	LX734	d123	13.87	3.071	6.24487	7.82006	1.57519	1	0.29777	2.32858	0.469045
0000002_30.tif	predator	LX734	d123	12.53	3.943	6.24487	7.07023	0.825365	1	0.29777	2.1053	0.245769
0000002_30.tif	predator	LX734	d123	10.405	5.637	6.24487	6.27669	0.0318251	1	0.29777	1.86901	0.00947655
0000002_30.tif	predator	LX734	d123	10.418	5.762	6.24487	6.16522	-0.0796522	0	0.29777	1.83582	-0.023718
0000002_30.tif	predator	LX734	d123	11.384	6.776	6.24487	4.79169	-1.45318	0	0.29777	1.42682	-0.432714
0000002_30.tif	predator	LX734	d123	11.745	6.839	6.24487	4.56109	-1.68378	0	0.29777	1.35816	-0.501379
0000002_30.tif	predator	LX734	d123	10.474	7.72	6.24487	4.62369	-1.62118	0	0.29777	1.37679	-0.482739
0000002_30.tif	predator	LX734	d123	10.724	7.623	6.24487	4.51476	-1.73011	0	0.29777	1.34436	-0.515174
0000002_30.tif	predator	LX734	d123	10.946	7.741	6.24487	4.27691	-1.96796	0	0.29777	1.27354	-0.585999
0000002_30.tif	predator	LX734	d123	10.703	9.193	6.24487	3.56619	-2.67868	0	0.29777	1.0619	-0.79763
0000002_30.tif	predator	LX734	d123	11.411	9.741	6.24487	2.68657	-3.55829	0	0.29777	0.799981	-1.05955
0000002_30.tif	predator	LX734	d123	15.182	9.269	6.24487	2.10583	-4.13903	0	0.29777	0.627054	-1.23248
0000002_30.tif	predator	LX734	d123	11.523	13.168	6.24487	3.24786	-2.99701	0	0.29777	0.967115	-0.892419
0000002_30.tif	predator	LX734	d123	11.502	13.55	6.24487	3.54004	-2.70483	0	0.29777	1.05412	-0.805418
0000002_30.tif	predator	LX734	d123	11.8	14.418	6.24487	4.07397	-2.1709	0	0.29777	1.21311	-0.646428
0000002_30.tif	predator	LX734	d123	11.786	14.502	6.24487	4.15381	-2.09106	0	0.29777	1.23688	-0.622655
0000002_30.tif	predator	LX734	d123	12.113	14.335	6.24487	3.8523	-2.39257	0	0.29777	1.1471	-0.712435
0000002_30.tif	predator	LX734	d123	12.252	13.939	6.24487	3.4364	-2.80846	0	0.29777	1.02326	-0.836276
0000002_30.tif	predator	LX734	d123	14.231	16.158	6.24487	5.28157	-0.9633	0	0.29777	1.57269	-0.286842
0000002_30.tif	predator	LX734	d123	13.3	17.38	6.24487	6.51135	0.266479	1	0.29777	1.93888	0.0793496
0000002_30.tif	predator	LX734	d123	14.3	18.908	6.24487	8.03024	1.78538	1	0.29777	2.39117	0.531631
0000002_30.tif	predator	LX734	d123	14.085	18.998	6.24487	8.11073	1.86586	1	0.29777	2.41513	0.555598
0000002_30.tif	predator	LX734	d123	14.453	20.63	6.24487	9.75834	3.51347	1	0.29777	2.90574	1.04621
0000002_30.tif	predator	LX734	d123	16.106	20.196	6.24487	9.57718	3.33231	1	0.29777	2.8518	0.992262
0000002_30.tif	predator	LX734	d123	15.398	16.491	6.24487	5.81296	-0.43191	0	0.29777	1.73092	-0.12861
0000002_30.tif	predator	LX734	d123	15.78	16.304	6.24487	5.75048	-0.494385	0	0.29777	1.71232	-0.147213
0000002_30.tif	predator	LX734	d123	17.155	15.526	6.24487	5.69904	-0.545826	0	0.29777	1.697	-0.16253
0000002_30.tif	predator	LX734	d123	17.002	15.193	6.24487	5.33964	-0.905226	0	0.29777	1.58999	-0.269549
0000002_30.tif	predator	LX734	d123	18.8	13.366	6.24487	5.54411	-0.700759	0	0.29777	1.65087	-0.208665
0000002_30.tif	predator	LX734	d123	16.523	12.707	6.24487	3.24063	-3.00423	0	0.29777	0.964964	-0.894571
0000002_30.tif	predator	LX734	d123	15.884	11.797	6.24487	2.23671	-4.00816	0	0.29777	0.666024	-1.19351
0000002_30.tif	predator	LX734	d123	18.398	12.38	6.24487	4.796	-1.44887	0	0.29777	1.4281	-0.43143
0000002_30.tif	predator	LX734	d123	18.488	12.339	6.24487	4.86928	-1.37559	0	0.29777	1.44993	-0.409608
0000002_30.tif	predator	LX734	d123	16.953	10.644	6.24487	3.12378	-3.12109	0	0.29777	0.930168	-0.929366
0000002_30.tif	predator	LX734	d123	17.877	10.484	6.24487	4.05846	-2.18641	0	0.29777	1.20849	-0.651047
0000002_30.tif	predator	LX734	d123	17.016	10.061	6.24487	3.28363	-2.96124	0	0.29777	0.977767	-0.881768
0000002_30.tif	predator	LX734	d123	18.418	9.297	6.24487	4.84851	-1.39635	0	0.29777	1.44374	-0.415793
0000002_30.tif	predator	LX734	d123	18.564	9.109	6.24487	5.04987	-1.195	0	0.29777	1.5037	-0.355836
0000002_30.tif	predator	LX734	d123	18.217	9.436	6.24487	4.61345	-1.63142	0	0.29777	1.37375	-0.485788
0000002_30.tif	predator	LX734	d123	18.641	8.033	6.24487	5.58815	-0.656722	0	0.29777	1.66398	-0.195552
0000002_30.tif	predator	LX734	d123	18.821	8.116	6.24487	5.70271	-0.542153	0	0.29777	1.6981	-0.161437
0000002_30.tif	predator	LX734	d123	18.856	8.04	6.24487	5.77048	-0.474383	0	0.29777	1.71828	-0.141257
0000002_30.tif	predator	LX734	d123	19.023	8.123	6.24487	5.87671	-0.368161	0	0.29777	1.74991	-0.109627
0000002_30.tif	predator	LX734	d123	18.849	7.741	6.24487	5.91799	-0.326878	0	0.29777	1.7622	-0.0973345
0000002_30.tif	predator	LX734	d123	18.661	7.748	6.24487	5.75588	-0.48899	0	0.29777	1.71393	-0.145606
0000002_30.tif	predator	LX734	d123	18.481	7.658	6.24487	5.65689	-0.587973	0	0.29777	1.68445	-0.175081
0000002_30.tif	predator	LX734	d123	16.668	5.95	6.24487	5.69357	-0.551299	0	0.29777	1.69537	-0.16416
0000002_30.tif	predator	LX734	d123	16.62	5.818	6.24487	5.78526	-0.459603	0	0.29777	1.72268	-0.136856
0000002_30.tif	predator	LX734	d123	16.488	5.686	6.24487	5.84031	-0.404557	0	0.29777	1.73907	-0.120465
0000002_30.tif	predator	LX734	d123	16.453	4.582	6.24487	6.82909	0.584223	1	0.29777	2.0335	0.173964
0000002_30.tif	predator	LX734	d123	16.37	4.484	6.24487	6.8888	0.643936	1	0.29777	2.05128	0.191745
0000002_30.tif	predator	LX734	d123	15.62	3.512	6.24487	7.59089	1.34602	1	0.29777	2.26034	0.400805
0000002_30.tif	predator	LX734	d123	15.641	3.387	6.24487	7.71733	1.47246	1	0.29777	2.29799	0.438456
0000002_30.tif	predator	LX734	d123	15.946	2.818	6.24487	8.34343	2.09856	1	0.29777	2.48442	0.624888
0000002_30.tif	predator	LX734	d123	15.981	2.748	6.24487	8.42001	2.17514	1	0.29777	2.50723	0.647693
0000002_30.tif	predator	LX734	d123	16.113	2.783	6.24487	8.42085	2.17598	1	0.29777	2.50748	0.647943
0000002_30.tif	predator	LX734	d123	19.891	5.356	6.24487	8.2014	1.95653	1	0.29777	2.44213	0.582596
0000002_30.tif	predator	LX734	d123	20.793	7.109	6.24487	7.91591	1.67104	1	0.29777	2.35712	0.497586
0000002_30.tif	predator	LX734	d123	19.356	8.116	6.24487	6.17559	-0.0692775	0	0.29777	1.83891	-0.0206288
0000002_30.tif	predator	LX734	d123	19.425	8.214	6.24487	6.19433	-0.0505376	0	0.29777	1.84449	-0.0150486
0000002_30.tif	predator	LX734	d123	22.057	10.384	6.24487	8.23362	1.98876	1	0.29777	2.45173	0.592192
0000002_30.tif	predator	LX734	d123	20.668	12.106	6.24487	6.93624	0.691375	1	0.29777	2.06541	0.205871
0000002_30.tif	predator	LX734	d123	20.536	12.217	6.24487	6.82701	0.582144	1	0.29777	2.03288	0.173345
0000002_30.tif	predator	LX734	d123	19.842	12.988	6.24487	6.35873	0.11386	1	0.29777	1.89344	0.0339041
0000002_30.tif	predator	LX734	d123	21.418	16.068	6.24487	9.17838	2.93351	1	0.29777	2.73304	0.873511
0000002_30.tif	predator	LX734	d123	21.516	16.137	6.24487	9.29822	3.05335	1	0.29777	2.76873	0.909196
0000002_30.tif	predator	LX734	d123	24.182	11.443	6.24487	10.3577	4.11285	1	0.29777	3.08422	1.22468
0000002_30.tif	predator	LX734	d123	25.13	10.911	6.24487	11.291	5.04615	1	0.29777	3.36213	1.50259
0000002_32.tif	control	N2	wt	6.193	17.536	5.89604	8.31911	2.42308	1	0.29777	2.47718	0.72152
0000002_32.tif	control	N2	wt	7.719	19.281	5.89604	8.67246	2.77643	1	0.29777	2.5824	0.826737
0000002_32.tif	control	N2	wt	7.87	18.958	5.89604	8.31896	2.42292	1	0.29777	2.47714	0.721472
0000002_32.tif	control	N2	wt	7.536	18.776	5.89604	8.3549	2.45886	1	0.29777	2.48784	0.732176
0000002_32.tif	control	N2	wt	8.375	19.276	5.89604	8.33506	2.43902	1	0.29777	2.48193	0.726268
0000002_32.tif	control	N2	wt	8.542	18.682	5.89604	7.73482	1.83879	1	0.29777	2.3032	0.547535
0000002_32.tif	control	N2	wt	8.698	18.604	5.89604	7.59053	1.6945	1	0.29777	2.26023	0.50457
0000002_32.tif	control	N2	wt	8.781	19.052	5.89604	7.94795	2.05191	1	0.29777	2.36666	0.610998
0000002_32.tif	control	N2	wt	9.005	18.901	5.89604	7.71329	1.81725	1	0.29777	2.29679	0.541123
0000002_32.tif	control	N2	wt	9.25	17.76	5.89604	6.58532	0.689282	1	0.29777	1.96091	0.205247
0000002_32.tif	control	N2	wt	9.49	18.495	5.89604	7.14129	1.24525	1	0.29777	2.12646	0.370798
0000002_32.tif	control	N2	wt	9.547	17.854	5.89604	6.53483	0.638788	1	0.29777	1.94587	0.190212
0000002_32.tif	control	N2	wt	9.573	17.729	5.89604	6.41091	0.514868	1	0.29777	1.90898	0.153312
0000002_32.tif	control	N2	wt	9.708	17.635	5.89604	6.26801	0.371975	1	0.29777	1.86643	0.110763
0000002_32.tif	control	N2	wt	10.479	16.943	5.89604	5.32984	-0.566195	0	0.29777	1.58707	-0.168596
0000002_32.tif	control	N2	wt	10.094	16.802	5.89604	5.34993	-0.546105	0	0.29777	1.59305	-0.162614
0000002_32.tif	control	N2	wt	10.219	16.781	5.89604	5.27889	-0.617151	0	0.29777	1.57189	-0.183769
0000002_32.tif	control	N2	wt	10.109	16.698	5.89604	5.24949	-0.646548	0	0.29777	1.56314	-0.192523
0000002_32.tif	control	N2	wt	9.755	16.875	5.89604	5.56678	-0.329262	0	0.29777	1.65762	-0.0980444
0000002_32.tif	control	N2	wt	9.797	16.943	5.89604	5.60757	-0.288467	0	0.29777	1.66977	-0.0858968
0000002_32.tif	control	N2	wt	10.37	15.917	5.89604	4.43325	-1.46279	0	0.29777	1.32009	-0.435574
0000002_32.tif	control	N2	wt	9.635	14.901	5.89604	4.01424	-1.88179	0	0.29777	1.19532	-0.560342
0000002_32.tif	control	N2	wt	10.281	14.901	5.89604	3.60615	-2.28989	0	0.29777	1.0738	-0.68186
0000002_32.tif	control	N2	wt	10.542	14.812	5.89604	3.38654	-2.5095	0	0.29777	1.00841	-0.747253
0000002_32.tif	control	N2	wt	9.557	14.344	5.89604	3.68481	-2.21122	0	0.29777	1.09723	-0.658436
0000002_32.tif	control	N2	wt	9.172	14.344	5.89604	3.98601	-1.91003	0	0.29777	1.18691	-0.56875
0000002_32.tif	control	N2	wt	8.276	14.391	5.89604	4.75809	-1.13795	0	0.29777	1.41682	-0.338847
0000002_32.tif	control	N2	wt	8.031	14.104	5.89604	4.8362	-1.05983	0	0.29777	1.44008	-0.315587
0000002_32.tif	control	N2	wt	8.021	13.984	5.89604	4.79323	-1.10281	0	0.29777	1.42728	-0.328384
0000002_32.tif	control	N2	wt	8.771	12.896	5.89604	3.71439	-2.18165	0	0.29777	1.10603	-0.64963
0000002_32.tif	control	N2	wt	8.318	12.271	5.89604	4.05909	-1.83695	0	0.29777	1.20867	-0.546989
0000002_32.tif	control	N2	wt	8.312	12.156	5.89604	4.05783	-1.8382	0	0.29777	1.2083	-0.547362
0000002_32.tif	control	N2	wt	9.391	12.318	5.89604	2.99571	-2.90033	0	0.29777	0.892032	-0.863631
0000002_32.tif	control	N2	wt	10.302	12.417	5.89604	2.11345	-3.78259	0	0.29777	0.629321	-1.12634
0000002_32.tif	control	N2	wt	9.865	11.74	5.89604	2.50949	-3.38655	0	0.29777	0.74725	-1.00841
0000002_32.tif	control	N2	wt	7.521	11.344	5.89604	4.88276	-1.01328	0	0.29777	1.45394	-0.301724
0000002_32.tif	control	N2	wt	7.844	11.552	5.89604	4.53919	-1.35684	0	0.29777	1.35164	-0.404027
0000002_32.tif	control	N2	wt	7.844	11.333	5.89604	4.564	-1.33204	0	0.29777	1.35902	-0.396642
0000002_32.tif	control	N2	wt	7.984	11.224	5.89604	4.44206	-1.45398	0	0.29777	1.32271	-0.43295
0000002_32.tif	control	N2	wt	7.906	11.052	5.89604	4.55011	-1.34593	0	0.29777	1.35489	-0.400776
0000002_32.tif	control	N2	wt	9.542	10.297	5.89604	3.2754	-2.62064	0	0.29777	0.975316	-0.780347
0000002_32.tif	control	N2	wt	9.536	10.219	5.89604	3.32075	-2.57529	0	0.29777	0.988819	-0.766844
0000002_32.tif	control	N2	wt	9.568	10.135	5.89604	3.33864	-2.55739	0	0.29777	0.994148	-0.761515
0000002_32.tif	control	N2	wt	9.448	10.135	5.89604	3.4398	-2.45624	0	0.29777	1.02427	-0.731394
0000002_32.tif	control	N2	wt	9.521	10.036	5.89604	3.43255	-2.46348	0	0.29777	1.02211	-0.733552
0000002_32.tif	control	N2	wt	9.885	9.609	5.89604	3.41587	-2.48016	0	0.29777	1.01715	-0.738518
0000002_32.tif	control	N2	wt	8.656	9.521	5.89604	4.43798	-1.45806	0	0.29777	1.3215	-0.434166
0000002_32.tif	control	N2	wt	9.182	9.599	5.89604	3.96186	-1.93417	0	0.29777	1.17972	-0.575939
0000002_32.tif	control	N2	wt	8.969	9.208	5.89604	4.36982	-1.52622	0	0.29777	1.3012	-0.454462
0000002_32.tif	control	N2	wt	9.224	9.219	5.89604	4.16749	-1.72854	0	0.29777	1.24095	-0.514709
0000002_32.tif	control	N2	wt	14.043	3.186	5.89604	8.93105	3.03501	1	0.29777	2.6594	0.903736
0000002_32.tif	control	N2	wt	14.148	3.186	5.89604	8.95137	3.05534	1	0.29777	2.66545	0.909787
0000002_32.tif	control	N2	wt	14.002	3.359	5.89604	8.75343	2.85739	1	0.29777	2.60651	0.850846
0000002_32.tif	control	N2	wt	12.634	6.071	5.89604	5.89314	-0.00289497	0	0.29777	1.7548	-0.000862034
0000002_32.tif	control	N2	wt	12.828	6.009	5.89604	5.96699	0.0709524	1	0.29777	1.77679	0.0211275
0000002_32.tif	control	N2	wt	13.661	7.078	5.89604	5.04916	-0.846878	0	0.29777	1.50349	-0.252175
0000002_32.tif	control	N2	wt	13.085	7.78	5.89604	4.23959	-1.65645	0	0.29777	1.26242	-0.493242
0000002_32.tif	control	N2	wt	14.46	7.564	5.89604	4.86788	-1.02816	0	0.29777	1.44951	-0.306154
0000002_32.tif	control	N2	wt	14.446	7.043	5.89604	5.3374	-0.558643	0	0.29777	1.58932	-0.166347
0000002_32.tif	control	N2	wt	11.516	8.259	5.89604	3.79518	-2.10086	0	0.29777	1.13009	-0.625572
0000002_32.tif	control	N2	wt	11.925	9.043	5.89604	2.94802	-2.94802	0	0.29777	0.877832	-0.877831
0000002_32.tif	control	N2	wt	15.071	8.627	5.89604	4.29162	-1.60442	0	0.29777	1.27792	-0.477748
0000002_32.tif	control	N2	wt	14.321	9.71	5.89604	2.97984	-2.9162	0	0.29777	0.887307	-0.868356
0000002_32.tif	control	N2	wt	13.71	9.898	5.89604	2.46021	-3.43583	0	0.29777	0.732576	-1.02309
0000002_32.tif	control	N2	wt	13.175	9.849	5.89604	2.2592	-3.63684	0	0.29777	0.672722	-1.08294
0000002_32.tif	control	N2	wt	13.078	9.911	5.89604	2.16762	-3.72842	0	0.29777	0.645452	-1.11021
0000002_32.tif	control	N2	wt	12.641	10.043	5.89604	1.93479	-3.96125	0	0.29777	0.576122	-1.17954
0000002_32.tif	control	N2	wt	12.474	10.03	5.89604	1.93108	-3.96496	0	0.29777	0.575017	-1.18065
0000002_32.tif	control	N2	wt	11.953	9.37	5.89604	2.62059	-3.27545	0	0.29777	0.780333	-0.97533
0000002_32.tif	control	N2	wt	11.571	9.3	5.89604	2.77406	-3.12198	0	0.29777	0.826031	-0.929632
0000002_32.tif	control	N2	wt	10.78	9.748	5.89604	2.71962	-3.17642	0	0.29777	0.809821	-0.945842
0000002_32.tif	control	N2	wt	11.078	9.915	5.89604	2.41458	-3.48145	0	0.29777	0.718991	-1.03667
0000002_32.tif	control	N2	wt	10.578	10.672	5.89604	2.20163	-3.69441	0	0.29777	0.655579	-1.10008
0000002_32.tif	control	N2	wt	10.689	10.839	5.89604	2.01523	-3.88081	0	0.29777	0.600074	-1.15559
0000002_32.tif	control	N2	wt	10.745	11.234	5.89604	1.77442	-4.12161	0	0.29777	0.52837	-1.22729
0000002_32.tif	control	N2	wt	10.96	10.88	5.89604	1.77091	-4.12513	0	0.29777	0.527323	-1.22834
0000002_32.tif	control	N2	wt	12.293	10.398	5.89604	1.56166	-4.33438	0	0.29777	0.465016	-1.29065
0000002_32.tif	control	N2	wt	11.877	10.53	5.89604	1.50908	-4.38696	0	0.29777	0.449359	-1.3063
0000002_32.tif	control	N2	wt	11.668	10.731	5.89604	1.41115	-4.48489	0	0.29777	0.420197	-1.33547
0000002_32.tif	control	N2	wt	11.28	10.731	5.89604	1.63791	-4.25813	0	0.29777	0.487721	-1.26794
0000002_32.tif	control	N2	wt	11.516	11.016	5.89604	1.26813	-4.6279	0	0.29777	0.377612	-1.37805
0000002_32.tif	control	N2	wt	11.238	11.182	5.89604	1.36832	-4.52772	0	0.29777	0.407445	-1.34822
0000002_32.tif	control	N2	wt	11.085	11.238	5.89604	1.4686	-4.42743	0	0.29777	0.437306	-1.31836
0000002_32.tif	control	N2	wt	10.773	11.911	5.89604	1.59269	-4.30334	0	0.29777	0.474256	-1.28141
0000002_32.tif	control	N2	wt	11.141	11.814	5.89604	1.23244	-4.6636	0	0.29777	0.366984	-1.38868
0000002_32.tif	control	N2	wt	11.613	11.731	5.89604	0.785514	-5.11052	0	0.29777	0.233903	-1.52176
0000002_32.tif	control	N2	wt	11.62	12.03	5.89604	0.748471	-5.14757	0	0.29777	0.222872	-1.53279
0000002_32.tif	control	N2	wt	13.286	11.377	5.89604	1.08895	-4.80709	0	0.29777	0.324255	-1.43141
0000002_32.tif	control	N2	wt	13.946	12.432	5.89604	1.65053	-4.24551	0	0.29777	0.491477	-1.26419
0000002_32.tif	control	N2	wt	14.092	12.46	5.89604	1.79848	-4.09756	0	0.29777	0.535534	-1.22013
0000002_32.tif	control	N2	wt	13.724	12.682	5.89604	1.53982	-4.35621	0	0.29777	0.458513	-1.29715
0000002_32.tif	control	N2	wt	13.606	12.738	5.89604	1.46577	-4.43027	0	0.29777	0.436462	-1.3192
0000002_32.tif	control	N2	wt	13.592	13.321	5.89604	1.83393	-4.06211	0	0.29777	0.546089	-1.20957
0000002_32.tif	control	N2	wt	13.807	13.814	5.89604	2.35034	-3.5457	0	0.29777	0.699861	-1.0558
0000002_32.tif	control	N2	wt	12.682	12.585	5.89604	0.70258	-5.19346	0	0.29777	0.209207	-1.54646
0000002_32.tif	control	N2	wt	11.502	12.488	5.89604	1.01275	-4.88328	0	0.29777	0.301568	-1.4541
0000002_32.tif	control	N2	wt	11.557	12.571	5.89604	1.01422	-4.88182	0	0.29777	0.302003	-1.45366
0000002_32.tif	control	N2	wt	11.627	12.405	5.89604	0.862817	-5.03322	0	0.29777	0.256921	-1.49874
0000002_32.tif	control	N2	wt	11.752	12.856	5.89604	1.08728	-4.80876	0	0.29777	0.323759	-1.4319
0000002_32.tif	control	N2	wt	11.939	12.925	5.89604	1.05668	-4.83936	0	0.29777	0.314647	-1.44102
0000002_32.tif	control	N2	wt	11.911	13.009	5.89604	1.14487	-4.75117	0	0.29777	0.340907	-1.41476
0000002_32.tif	control	N2	wt	11.731	13.203	5.89604	1.39713	-4.4989	0	0.29777	0.416024	-1.33964
0000002_32.tif	control	N2	wt	11.627	13.668	5.89604	1.86246	-4.03358	0	0.29777	0.554584	-1.20108
0000002_32.tif	control	N2	wt	10.71	14.297	5.89604	2.8653	-3.03074	0	0.29777	0.8532	-0.902463
0000002_32.tif	control	N2	wt	11.057	14.748	5.89604	3.08139	-2.81465	0	0.29777	0.917545	-0.838118
0000002_32.tif	control	N2	wt	11.085	14.644	5.89604	2.9754	-2.92064	0	0.29777	0.885984	-0.869679
0000002_32.tif	control	N2	wt	10.918	14.887	5.89604	3.26693	-2.6291	0	0.29777	0.972795	-0.782869
0000002_32.tif	control	N2	wt	11.168	15.311	5.89604	3.56026	-2.33578	0	0.29777	1.06014	-0.695526
0000002_32.tif	control	N2	wt	11.078	15.29	5.89604	3.57192	-2.32412	0	0.29777	1.06361	-0.692053
0000002_32.tif	control	N2	wt	11.113	15.394	5.89604	3.65699	-2.23904	0	0.29777	1.08894	-0.66672
0000002_32.tif	control	N2	wt	11.599	14.984	5.89604	3.12145	-2.77459	0	0.29777	0.929473	-0.82619
0000002_32.tif	control	N2	wt	11.481	14.922	5.89604	3.09302	-2.80302	0	0.29777	0.921008	-0.834656
0000002_32.tif	control	N2	wt	11.599	14.658	5.89604	2.80656	-3.08948	0	0.29777	0.835708	-0.919955
0000002_32.tif	control	N2	wt	11.766	14.269	5.89604	2.38737	-3.50867	0	0.29777	0.710886	-1.04478
0000002_32.tif	control	N2	wt	11.759	14.123	5.89604	2.24821	-3.64782	0	0.29777	0.66945	-1.08621
0000002_32.tif	control	N2	wt	12.259	14.394	5.89604	2.43831	-3.45773	0	0.29777	0.726054	-1.02961
0000002_32.tif	control	N2	wt	13.377	14.109	5.89604	2.37717	-3.51887	0	0.29777	0.70785	-1.04781
0000002_32.tif	control	N2	wt	14.307	14.318	5.89604	3.0563	-2.83974	0	0.29777	0.910074	-0.845589
0000002_32.tif	control	N2	wt	12.231	14.873	5.89604	2.91808	-2.97796	0	0.29777	0.868916	-0.886747
0000002_32.tif	control	N2	wt	12.592	15.248	5.89604	3.29782	-2.59822	0	0.29777	0.981992	-0.773671
0000002_32.tif	control	N2	wt	13.217	15.651	5.89604	3.79001	-2.10603	0	0.29777	1.12855	-0.627113
0000002_32.tif	control	N2	wt	13.342	15.477	5.89604	3.65211	-2.24393	0	0.29777	1.08749	-0.668175
0000002_32.tif	control	N2	wt	13.543	15.255	5.89604	3.50113	-2.39491	0	0.29777	1.04253	-0.713132
0000002_32.tif	control	N2	wt	13.613	15.172	5.89604	3.4478	-2.44824	0	0.29777	1.02665	-0.729013
0000002_32.tif	control	N2	wt	13.293	15.866	5.89604	4.01667	-1.87937	0	0.29777	1.19604	-0.559619
0000002_32.tif	control	N2	wt	13.398	15.915	5.89604	4.08961	-1.80642	0	0.29777	1.21776	-0.537899
0000002_32.tif	control	N2	wt	11.752	15.484	5.89604	3.57889	-2.31715	0	0.29777	1.06569	-0.689977
0000002_32.tif	control	N2	wt	10.648	15.991	5.89604	4.38328	-1.51275	0	0.29777	1.30521	-0.450453
0000002_32.tif	control	N2	wt	10.731	15.915	5.89604	4.2811	-1.61494	0	0.29777	1.27478	-0.48088
0000002_32.tif	control	N2	wt	10.613	16.387	5.89604	4.76293	-1.1331	0	0.29777	1.41826	-0.337404
0000002_32.tif	control	N2	wt	11.536	15.922	5.89604	4.04976	-1.84628	0	0.29777	1.2059	-0.549767
0000002_32.tif	control	N2	wt	11.696	15.977	5.89604	4.0743	-1.82174	0	0.29777	1.2132	-0.542459
0000002_32.tif	control	N2	wt	11.675	16.102	5.89604	4.20105	-1.69499	0	0.29777	1.25095	-0.504716
0000002_32.tif	control	N2	wt	12.516	15.88	5.89604	3.92491	-1.97113	0	0.29777	1.16872	-0.586944
0000002_32.tif	control	N2	wt	12.745	16.186	5.89604	4.24504	-1.651	0	0.29777	1.26405	-0.491617
0000002_32.tif	control	N2	wt	12.87	16.102	5.89604	4.17466	-1.72138	0	0.29777	1.24309	-0.512576
0000002_32.tif	control	N2	wt	15.432	15.776	5.89604	4.89731	-0.998731	0	0.29777	1.45827	-0.297392
0000002_32.tif	control	N2	wt	15.189	16.637	5.89604	5.46516	-0.430874	0	0.29777	1.62736	-0.128301
0000002_32.tif	control	N2	wt	13.995	16.755	5.89604	5.06637	-0.829667	0	0.29777	1.50861	-0.24705
0000002_32.tif	control	N2	wt	14.189	16.623	5.89604	5.00891	-0.887125	0	0.29777	1.4915	-0.264159
0000002_32.tif	control	N2	wt	13.981	17.102	5.89604	5.39186	-0.504174	0	0.29777	1.60554	-0.150128
0000002_32.tif	control	N2	wt	13.898	17.13	5.89604	5.39441	-0.501626	0	0.29777	1.60629	-0.149369
0000002_32.tif	control	N2	wt	12.384	16.658	5.89604	4.70004	-1.196	0	0.29777	1.39953	-0.356133
0000002_32.tif	control	N2	wt	12.668	16.845	5.89604	4.89638	-0.999653	0	0.29777	1.458	-0.297667
0000002_32.tif	control	N2	wt	12.807	17.075	5.89604	5.13605	-0.759983	0	0.29777	1.52936	-0.2263
0000002_32.tif	control	N2	wt	12.661	17.2	5.89604	5.25035	-0.645687	0	0.29777	1.5634	-0.192266
0000002_32.tif	control	N2	wt	12.474	17.352	5.89604	5.3951	-0.500936	0	0.29777	1.6065	-0.149164
0000002_32.tif	control	N2	wt	12.391	17.484	5.89604	5.52606	-0.369976	0	0.29777	1.6455	-0.110168
0000002_32.tif	control	N2	wt	12.106	17.526	5.89604	5.57402	-0.322017	0	0.29777	1.65978	-0.095887
0000002_32.tif	control	N2	wt	12.085	17.429	5.89604	5.47816	-0.417877	0	0.29777	1.63123	-0.124431
0000002_32.tif	control	N2	wt	10.911	17.464	5.89604	5.69475	-0.20129	0	0.29777	1.69573	-0.0599381
0000002_32.tif	control	N2	wt	10.946	17.568	5.89604	5.78668	-0.109358	0	0.29777	1.7231	-0.0325635
0000002_32.tif	control	N2	wt	10.828	17.186	5.89604	5.44925	-0.446785	0	0.29777	1.62262	-0.133039
0000002_32.tif	control	N2	wt	11.266	17.068	5.89604	5.22684	-0.669193	0	0.29777	1.5564	-0.199266
0000002_32.tif	control	N2	wt	11.335	17.068	5.89604	5.21277	-0.683265	0	0.29777	1.55221	-0.203456
0000002_32.tif	control	N2	wt	11.474	17.061	5.89604	5.1802	-0.715836	0	0.29777	1.54251	-0.213154
0000002_32.tif	control	N2	wt	11.641	16.984	5.89604	5.07788	-0.818159	0	0.29777	1.51204	-0.243623
0000002_32.tif	control	N2	wt	11.439	17.2	5.89604	5.32316	-0.572877	0	0.29777	1.58508	-0.170586
0000002_32.tif	control	N2	wt	11.627	17.97	5.89604	6.05713	0.161089	1	0.29777	1.80363	0.0479676
0000002_32.tif	control	N2	wt	11.828	17.859	5.89604	5.92538	0.0293459	1	0.29777	1.7644	0.00873834
0000002_32.tif	control	N2	wt	11.863	18.089	5.89604	6.15152	0.25548	1	0.29777	1.83174	0.0760742
0000002_32.tif	control	N2	wt	11.939	18.102	5.89604	6.15875	0.262713	1	0.29777	1.83389	0.0782281
0000002_32.tif	control	N2	wt	12.377	18.116	5.89604	6.15801	0.261974	1	0.29777	1.83367	0.078008
0000002_32.tif	control	N2	wt	11.599	18.755	5.89604	6.84003	0.943989	1	0.29777	2.03675	0.281092
0000002_32.tif	control	N2	wt	11.613	18.623	5.89604	6.70729	0.811252	1	0.29777	1.99723	0.241566
0000002_32.tif	control	N2	wt	11.953	18.908	5.89604	6.9622	1.06616	1	0.29777	2.07313	0.317472
0000002_32.tif	control	N2	wt	15.776	14.418	5.89604	4.20553	-1.6905	0	0.29777	1.25228	-0.503381
0000002_32.tif	control	N2	wt	15.839	14.391	5.89604	4.24125	-1.65479	0	0.29777	1.26292	-0.492747
0000002_32.tif	control	N2	wt	16.047	14.002	5.89604	4.2113	-1.68474	0	0.29777	1.254	-0.501664
0000002_32.tif	control	N2	wt	16.193	13.925	5.89604	4.3038	-1.59224	0	0.29777	1.28154	-0.474121
0000002_32.tif	control	N2	wt	16.22	13.821	5.89604	4.28156	-1.61447	0	0.29777	1.27492	-0.480742
0000002_32.tif	control	N2	wt	16.283	13.745	5.89604	4.30629	-1.58975	0	0.29777	1.28228	-0.473381
0000002_32.tif	control	N2	wt	16.332	13.87	5.89604	4.40373	-1.49231	0	0.29777	1.3113	-0.444365
0000002_32.tif	control	N2	wt	15.54	10.606	5.89604	3.45087	-2.44516	0	0.29777	1.02757	-0.728096
0000002_32.tif	control	N2	wt	17.262	10.918	5.89604	5.00622	-0.889821	0	0.29777	1.4907	-0.264962
0000002_32.tif	control	N2	wt	17.234	10.62	5.89604	5.0495	-0.846542	0	0.29777	1.50359	-0.252075
0000002_32.tif	control	N2	wt	17.359	10.495	5.89604	5.20388	-0.692154	0	0.29777	1.54956	-0.206103
0000002_32.tif	control	N2	wt	17.366	10.189	5.89604	5.30465	-0.591383	0	0.29777	1.57957	-0.176096
0000002_32.tif	control	N2	wt	16.797	9.557	5.89604	5.04058	-0.85546	0	0.29777	1.50093	-0.25473
0000002_32.tif	control	N2	wt	16.686	9.557	5.89604	4.94326	-0.952775	0	0.29777	1.47196	-0.283708
0000002_32.tif	control	N2	wt	16.102	8.821	5.89604	4.87913	-1.0169	0	0.29777	1.45286	-0.302804
0000002_32.tif	control	N2	wt	15.908	9.05	5.89604	4.58359	-1.31245	0	0.29777	1.36486	-0.390807
0000002_32.tif	control	N2	wt	15.575	8.668	5.89604	4.59654	-1.2995	0	0.29777	1.36871	-0.386951
0000002_32.tif	control	N2	wt	16.276	8.53	5.89604	5.20068	-0.695354	0	0.29777	1.54861	-0.207056
0000002_32.tif	control	N2	wt	16.457	8.189	5.89604	5.56326	-0.332781	0	0.29777	1.65657	-0.0990922
0000002_32.tif	control	N2	wt	16.734	9.057	5.89604	5.24442	-0.651616	0	0.29777	1.56163	-0.194032
0000002_32.tif	control	N2	wt	16.79	8.946	5.89604	5.35283	-0.543209	0	0.29777	1.59391	-0.161751
0000002_32.tif	control	N2	wt	15.797	8.03	5.89604	5.21611	-0.679927	0	0.29777	1.5532	-0.202462
0000002_32.tif	control	N2	wt	15.887	7.953	5.89604	5.33334	-0.562698	0	0.29777	1.58811	-0.167555
0000002_32.tif	control	N2	wt	15.644	7.398	5.89604	5.61653	-0.279505	0	0.29777	1.67243	-0.0832281
0000002_32.tif	control	N2	wt	15.679	7.307	5.89604	5.7109	-0.185136	0	0.29777	1.70054	-0.0551279
0000002_32.tif	control	N2	wt	15.984	7.578	5.89604	5.68169	-0.214351	0	0.29777	1.69184	-0.0638273
0000002_32.tif	control	N2	wt	16.179	7.099	5.89604	6.17709	0.281055	1	0.29777	1.83935	0.0836898
0000002_32.tif	control	N2	wt	16.22	7.127	5.89604	6.18058	0.284544	1	0.29777	1.84039	0.0847286
0000002_32.tif	control	N2	wt	16.464	7.425	5.89604	6.11146	0.215418	1	0.29777	1.81981	0.064145
0000002_32.tif	control	N2	wt	16.964	7.023	5.89604	6.74574	0.849704	1	0.29777	2.00868	0.253016
0000002_32.tif	control	N2	wt	16.248	4.693	5.89604	8.23759	2.34155	1	0.29777	2.45291	0.697245
0000002_32.tif	control	N2	wt	16.415	4.602	5.89604	8.39722	2.50118	1	0.29777	2.50044	0.744776
0000002_32.tif	control	N2	wt	18.075	4.602	5.89604	9.31208	3.41604	1	0.29777	2.77286	1.01719
0000003_24.tif	predator	LX734	d123	3.594	12.62	6.41657	9.61417	3.19759	1	0.29777	2.86281	0.952147
0000003_24.tif	predator	LX734	d123	3.844	13.646	6.41657	9.37221	2.95564	1	0.29777	2.79076	0.8801
0000003_24.tif	predator	LX734	d123	4.552	14.266	6.41657	8.72943	2.31285	1	0.29777	2.59936	0.688699
0000003_24.tif	predator	LX734	d123	4.714	14.328	6.41657	8.57794	2.16136	1	0.29777	2.55425	0.643589
0000003_24.tif	predator	LX734	d123	5.115	15.911	6.41657	8.5704	2.15382	1	0.29777	2.55201	0.641343
0000003_24.tif	predator	LX734	d123	5.698	17.115	6.41657	8.52507	2.10849	1	0.29777	2.53851	0.627847
0000003_24.tif	predator	LX734	d123	6.339	17.443	6.41657	8.13874	1.72216	1	0.29777	2.42347	0.512808
0000003_24.tif	predator	LX734	d123	7.625	19.37	6.41657	8.4172	2.00062	1	0.29777	2.50639	0.595725
0000003_24.tif	predator	LX734	d123	7.458	19.115	6.41657	8.34185	1.92527	1	0.29777	2.48395	0.573288
0000003_24.tif	predator	LX734	d123	7.516	18.755	6.41657	8.04334	1.62677	1	0.29777	2.39507	0.484403
0000003_24.tif	predator	LX734	d123	9.672	19.948	6.41657	7.73626	1.31968	1	0.29777	2.30363	0.392962
0000003_24.tif	predator	LX734	d123	9.464	19.651	6.41657	7.57349	1.15691	1	0.29777	2.25516	0.344493
0000003_24.tif	predator	LX734	d123	8.427	17.016	6.41657	6.1965	-0.220079	0	0.29777	1.84513	-0.0655329
0000003_24.tif	predator	LX734	d123	7.698	15.755	6.41657	6.12391	-0.292667	0	0.29777	1.82352	-0.0871473
0000003_24.tif	predator	LX734	d123	9.302	15.635	6.41657	4.66896	-1.74762	0	0.29777	1.39027	-0.520389
0000003_24.tif	predator	LX734	d123	9.526	15.005	6.41657	4.15438	-2.2622	0	0.29777	1.23705	-0.673615
0000003_24.tif	predator	LX734	d123	9.932	14.839	6.41657	3.71813	-2.69845	0	0.29777	1.10715	-0.803516
0000003_24.tif	predator	LX734	d123	7.177	14.234	6.41657	6.13401	-0.282569	0	0.29777	1.82652	-0.0841405
0000003_24.tif	predator	LX734	d123	7.453	11.141	6.41657	6.05766	-0.358913	0	0.29777	1.80379	-0.106873
0000003_24.tif	predator	LX734	d123	9.359	11.094	6.41657	4.31404	-2.10253	0	0.29777	1.28459	-0.626072
0000003_24.tif	predator	LX734	d123	9	10.74	6.41657	4.79738	-1.61919	0	0.29777	1.42852	-0.482147
0000003_24.tif	predator	LX734	d123	7.198	8.547	6.41657	7.50901	1.09244	1	0.29777	2.23596	0.325294
0000003_24.tif	predator	LX734	d123	7.271	8.448	6.41657	7.51121	1.09464	1	0.29777	2.23661	0.325951
0000003_24.tif	predator	LX734	d123	8.401	3.917	6.41657	10.3268	3.9102	1	0.29777	3.075	1.16434
0000003_24.tif	predator	LX734	d123	8.266	3.703	6.41657	10.579	4.16244	1	0.29777	3.15011	1.23945
0000003_24.tif	predator	LX734	d123	9.198	3.656	6.41657	10.2212	3.80462	1	0.29777	3.04357	1.1329
0000003_24.tif	predator	LX734	d123	11.516	1.656	6.41657	11.5294	5.11278	1	0.29777	3.4331	1.52243
0000003_24.tif	predator	LX734	d123	10.427	2.464	6.41657	10.9543	4.5377	1	0.29777	3.26185	1.35119
0000003_24.tif	predator	LX734	d123	10.411	2.651	6.41657	10.7776	4.36101	1	0.29777	3.20924	1.29858
0000003_24.tif	predator	LX734	d123	10.422	2.839	6.41657	10.5932	4.17663	1	0.29777	3.15434	1.24367
0000003_24.tif	predator	LX734	d123	10.333	2.969	6.41657	10.4918	4.07518	1	0.29777	3.12413	1.21347
0000003_24.tif	predator	LX734	d123	10.625	8.115	6.41657	5.57612	-0.840452	0	0.29777	1.6604	-0.250262
0000003_24.tif	predator	LX734	d123	10.536	8.349	6.41657	5.41282	-1.00376	0	0.29777	1.61178	-0.298888
0000003_24.tif	predator	LX734	d123	12.344	12.964	6.41657	0.859605	-5.55697	0	0.29777	0.255964	-1.6547
0000003_24.tif	predator	LX734	d123	12.281	13.104	6.41657	0.917961	-5.49861	0	0.29777	0.273341	-1.63732
0000003_24.tif	predator	LX734	d123	11.823	13.141	6.41657	1.37727	-5.03931	0	0.29777	0.410109	-1.50055
0000003_24.tif	predator	LX734	d123	11.281	13.859	6.41657	2.07608	-4.3405	0	0.29777	0.618194	-1.29247
0000003_24.tif	predator	LX734	d123	11.375	13.932	6.41657	2.01996	-4.39662	0	0.29777	0.601483	-1.30918
0000003_24.tif	predator	LX734	d123	10.885	14.198	6.41657	2.57691	-3.83966	0	0.29777	0.767326	-1.14334
0000003_24.tif	predator	LX734	d123	10.948	14.344	6.41657	2.5896	-3.82698	0	0.29777	0.771105	-1.13956
0000003_24.tif	predator	LX734	d123	10.87	14.625	6.41657	2.80402	-3.61255	0	0.29777	0.834954	-1.07571
0000003_24.tif	predator	LX734	d123	10.562	17.12	6.41657	4.83899	-1.57758	0	0.29777	1.44091	-0.469756
0000003_24.tif	predator	LX734	d123	10.198	17.609	6.41657	5.4475	-0.969079	0	0.29777	1.6221	-0.288563
0000003_24.tif	predator	LX734	d123	14.755	18.87	6.41657	6.01308	-0.403496	0	0.29777	1.79051	-0.120149
0000003_24.tif	predator	LX734	d123	14.823	18.792	6.41657	5.95597	-0.460609	0	0.29777	1.77351	-0.137156
0000003_24.tif	predator	LX734	d123	13.776	7.26	6.41657	5.83072	-0.585855	0	0.29777	1.73621	-0.17445
0000003_24.tif	predator	LX734	d123	13.667	7.245	6.41657	5.83588	-0.580698	0	0.29777	1.73775	-0.172915
0000003_24.tif	predator	LX734	d123	13.26	3.036	6.41657	10.0262	3.60962	1	0.29777	2.9855	1.07484
0000003_24.tif	predator	LX734	d123	13.438	2.953	6.41657	10.1118	3.69527	1	0.29777	3.01101	1.10034
0000003_24.tif	predator	LX734	d123	17.073	4.609	6.41657	9.29886	2.88229	1	0.29777	2.76892	0.858259
0000003_24.tif	predator	LX734	d123	17.229	4.625	6.41657	9.3505	2.93393	1	0.29777	2.7843	0.873636
0000003_24.tif	predator	LX734	d123	17.401	10.776	6.41657	4.78445	-1.63212	0	0.29777	1.42467	-0.485996
0000003_24.tif	predator	LX734	d123	16.406	14.552	6.41657	3.53714	-2.87943	0	0.29777	1.05325	-0.857409
0000003_24.tif	predator	LX734	d123	17	17.552	6.41657	5.88348	-0.533097	0	0.29777	1.75192	-0.15874
0000003_24.tif	predator	LX734	d123	16.938	17.719	6.41657	5.97288	-0.443698	0	0.29777	1.77854	-0.13212
0000003_24.tif	predator	LX734	d123	17.396	17.578	6.41657	6.16583	-0.250745	0	0.29777	1.836	-0.0746642
0000003_24.tif	predator	LX734	d123	17.026	18.615	6.41657	6.74458	0.328008	1	0.29777	2.00833	0.0976709
0000003_24.tif	predator	LX734	d123	17.203	18.646	6.41657	6.87176	0.455185	1	0.29777	2.0462	0.13554
0000003_24.tif	predator	LX734	d123	16.188	19.708	6.41657	7.28762	0.871046	1	0.29777	2.17003	0.259371
0000003_24.tif	predator	LX734	d123	16.542	20.63	6.41657	8.27387	1.8573	1	0.29777	2.46371	0.553048
0000003_24.tif	predator	LX734	d123	18.547	19.615	6.41657	8.45894	2.04236	1	0.29777	2.51882	0.608154
0000003_24.tif	predator	LX734	d123	18.427	17.146	6.41657	6.63487	0.218295	1	0.29777	1.97567	0.0650018
0000003_24.tif	predator	LX734	d123	18.417	17.047	6.41657	6.56644	0.149869	1	0.29777	1.95529	0.0446266
0000003_24.tif	predator	LX734	d123	18.411	16.891	6.41657	6.46812	0.0515481	1	0.29777	1.92601	0.0153495
0000003_24.tif	predator	LX734	d123	19.062	15.911	6.41657	6.51946	0.102881	1	0.29777	1.9413	0.0306348
0000003_24.tif	predator	LX734	d123	18.438	15.656	6.41657	5.84692	-0.569658	0	0.29777	1.74104	-0.169627
0000003_24.tif	predator	LX734	d123	18.359	15.562	6.41657	5.73462	-0.68195	0	0.29777	1.7076	-0.203064
0000003_24.tif	predator	LX734	d123	17.99	15.229	6.41657	5.2592	-1.15738	0	0.29777	1.56603	-0.344632
0000003_24.tif	predator	LX734	d123	17.964	15.01	6.41657	5.14873	-1.26784	0	0.29777	1.53314	-0.377525
0000003_24.tif	predator	LX734	d123	18.115	14.969	6.41657	5.27385	-1.14272	0	0.29777	1.5704	-0.340268
0000003_24.tif	predator	LX734	d123	18.271	15.089	6.41657	5.46297	-0.953603	0	0.29777	1.62671	-0.283954
0000003_24.tif	predator	LX734	d123	17.812	14.698	6.41657	4.89546	-1.52112	0	0.29777	1.45772	-0.452943
0000003_24.tif	predator	LX734	d123	18.51	14.193	6.41657	5.43107	-0.985506	0	0.29777	1.61721	-0.293454
0000003_24.tif	predator	LX734	d123	19.281	14.333	6.41657	6.21436	-0.20221	0	0.29777	1.85045	-0.060212
0000003_24.tif	predator	LX734	d123	19.385	14.198	6.41657	6.29043	-0.126148	0	0.29777	1.8731	-0.0375631
0000003_24.tif	predator	LX734	d123	17.651	7.146	6.41657	7.40461	0.988037	1	0.29777	2.20487	0.294208
0000003_24.tif	predator	LX734	d123	17.641	6.953	6.41657	7.55382	1.13724	1	0.29777	2.2493	0.338636
0000003_24.tif	predator	LX734	d123	21.057	5.776	6.41657	10.7168	4.30022	1	0.29777	3.19114	1.28048
0000003_24.tif	predator	LX734	d123	22.793	7.12	6.41657	11.2859	4.86932	1	0.29777	3.3606	1.44994
0000003_24.tif	predator	LX734	d123	23.516	8.578	6.41657	11.2502	4.83364	1	0.29777	3.34998	1.43931
0000003_24.tif	predator	LX734	d123	23.655	8.786	6.41657	11.2975	4.8809	1	0.29777	3.36405	1.45339
0000005_36.tif	control	N2	wt	11.958	14.74	5.47398	4.87266	-0.601319	0	0.29777	1.45093	-0.179055
0000005_36.tif	control	N2	wt	12.698	14.297	5.47398	4.06113	-1.41284	0	0.29777	1.20928	-0.420702
0000005_36.tif	control	N2	wt	12.375	13.5	5.47398	3.69816	-1.77581	0	0.29777	1.1012	-0.528784
0000005_36.tif	control	N2	wt	13.391	14.802	5.47398	4.13227	-1.34171	0	0.29777	1.23047	-0.39952
0000005_36.tif	control	N2	wt	14.88	16.026	5.47398	4.96596	-0.50802	0	0.29777	1.47871	-0.151273
0000005_36.tif	control	N2	wt	15.146	15.083	5.47398	4.01503	-1.45895	0	0.29777	1.19555	-0.434431
0000005_36.tif	control	N2	wt	14.922	14.677	5.47398	3.61691	-1.85707	0	0.29777	1.07701	-0.55298
0000005_36.tif	control	N2	wt	15.016	14.63	5.47398	3.56495	-1.90903	0	0.29777	1.06154	-0.568451
0000005_36.tif	control	N2	wt	13.943	14.37	5.47398	3.51948	-1.9545	0	0.29777	1.048	-0.581991
0000005_36.tif	control	N2	wt	14.068	14.344	5.47398	3.45352	-2.02045	0	0.29777	1.02836	-0.60163
0000005_36.tif	control	N2	wt	14.271	14.229	5.47398	3.2839	-2.19007	0	0.29777	0.977848	-0.652138
0000005_36.tif	control	N2	wt	13.396	14.115	5.47398	3.52128	-1.95269	0	0.29777	1.04853	-0.581454
0000005_36.tif	control	N2	wt	13.51	14.089	5.47398	3.44271	-2.03127	0	0.29777	1.02514	-0.604851
0000005_36.tif	control	N2	wt	14.698	13.427	5.47398	2.40401	-3.06997	0	0.29777	0.715841	-0.914145
0000005_36.tif	control	N2	wt	11.323	12.568	5.47398	4.12071	-1.35327	0	0.29777	1.22702	-0.402962
0000005_36.tif	control	N2	wt	11.49	12.828	5.47398	4.0711	-1.40288	0	0.29777	1.21225	-0.417735
0000005_36.tif	control	N2	wt	11.49	11.865	5.47398	3.75652	-1.71746	0	0.29777	1.11858	-0.511407
0000005_36.tif	control	N2	wt	11.786	11.859	5.47398	3.46645	-2.00752	0	0.29777	1.03221	-0.59778
0000005_36.tif	control	N2	wt	11.589	11.698	5.47398	3.62713	-1.84684	0	0.29777	1.08005	-0.549935
0000005_36.tif	control	N2	wt	12.552	12.922	5.47398	3.20066	-2.27332	0	0.29777	0.953059	-0.676927
0000005_36.tif	control	N2	wt	12.984	12.667	5.47398	2.70113	-2.77284	0	0.29777	0.804317	-0.825669
0000005_36.tif	control	N2	wt	13.068	12.625	5.47398	2.60862	-2.86536	0	0.29777	0.776769	-0.853217
0000005_36.tif	control	N2	wt	13.667	12.844	5.47398	2.32082	-3.15316	0	0.29777	0.691071	-0.938915
0000005_36.tif	control	N2	wt	13.432	12.464	5.47398	2.22222	-3.25176	0	0.29777	0.66171	-0.968276
0000005_36.tif	control	N2	wt	13.38	12.359	5.47398	2.19969	-3.27429	0	0.29777	0.655002	-0.974984
0000005_36.tif	control	N2	wt	13.505	12.193	5.47398	2.00199	-3.47199	0	0.29777	0.596132	-1.03385
0000005_36.tif	control	N2	wt	13.625	12.068	5.47398	1.83284	-3.64114	0	0.29777	0.545764	-1.08422
0000005_36.tif	control	N2	wt	13.599	11.974	5.47398	1.80574	-3.66824	0	0.29777	0.537694	-1.09229
0000005_36.tif	control	N2	wt	15.115	12.667	5.47398	1.59966	-3.87432	0	0.29777	0.476331	-1.15365
0000005_36.tif	control	N2	wt	15.109	12.297	5.47398	1.2301	-4.24388	0	0.29777	0.366287	-1.2637
0000005_36.tif	control	N2	wt	14.75	11.88	5.47398	0.910091	-4.56389	0	0.29777	0.270998	-1.35899
0000005_36.tif	control	N2	wt	15.068	11.964	5.47398	0.900814	-4.57316	0	0.29777	0.268235	-1.36175
0000005_36.tif	control	N2	wt	12.052	11.203	5.47398	3.11193	-2.36205	0	0.29777	0.926639	-0.703347
0000005_36.tif	control	N2	wt	12.38	10.859	5.47398	2.78884	-2.68513	0	0.29777	0.830434	-0.799552
0000005_36.tif	control	N2	wt	12.708	11.031	5.47398	2.45328	-3.0207	0	0.29777	0.730513	-0.899473
0000005_36.tif	control	N2	wt	13.26	10.344	5.47398	2.0342	-3.43977	0	0.29777	0.605724	-1.02426
0000005_36.tif	control	N2	wt	13.427	10.38	5.47398	1.8655	-3.60847	0	0.29777	0.555491	-1.0745
0000005_36.tif	control	N2	wt	13.536	10.323	5.47398	1.78764	-3.68634	0	0.29777	0.532305	-1.09768
0000005_36.tif	control	N2	wt	13.646	10.495	5.47398	1.61974	-3.85424	0	0.29777	0.48231	-1.14768
0000005_36.tif	control	N2	wt	13.786	10.641	5.47398	1.43978	-4.0342	0	0.29777	0.428722	-1.20126
0000005_36.tif	control	N2	wt	13.51	9.979	5.47398	1.97781	-3.49617	0	0.29777	0.588932	-1.04105
0000005_36.tif	control	N2	wt	13.427	9.885	5.47398	2.09911	-3.37487	0	0.29777	0.625051	-1.00494
0000005_36.tif	control	N2	wt	13.927	9.818	5.47398	1.75649	-3.71749	0	0.29777	0.52303	-1.10696
0000005_36.tif	control	N2	wt	14.042	9.745	5.47398	1.73277	-3.74121	0	0.29777	0.515967	-1.11402
0000005_36.tif	control	N2	wt	14.604	11.484	5.47398	0.695201	-4.77878	0	0.29777	0.20701	-1.42298
0000005_36.tif	control	N2	wt	14.714	11.458	5.47398	0.593219	-4.88076	0	0.29777	0.176643	-1.45334
0000005_36.tif	control	N2	wt	14.365	11.083	5.47398	0.796141	-4.67784	0	0.29777	0.237067	-1.39292
0000005_36.tif	control	N2	wt	14.641	10.958	5.47398	0.531507	-4.94247	0	0.29777	0.158267	-1.47172
0000005_36.tif	control	N2	wt	14.661	10.927	5.47398	0.519501	-4.95448	0	0.29777	0.154692	-1.47529
0000005_36.tif	control	N2	wt	14.828	10.995	5.47398	0.340908	-5.13307	0	0.29777	0.101512	-1.52847
0000005_36.tif	control	N2	wt	14.823	10.74	5.47398	0.470986	-5.00299	0	0.29777	0.140246	-1.48974
0000005_36.tif	control	N2	wt	15.042	10.833	5.47398	0.263412	-5.21056	0	0.29777	0.0784363	-1.55155
0000005_36.tif	control	N2	wt	15.083	10.396	5.47398	0.676512	-4.79746	0	0.29777	0.201445	-1.42854
0000005_36.tif	control	N2	wt	14.328	9.385	5.47398	1.87787	-3.59611	0	0.29777	0.559172	-1.07081
0000005_36.tif	control	N2	wt	14.281	9.141	5.47398	2.11843	-3.35555	0	0.29777	0.630804	-0.999182
0000005_36.tif	control	N2	wt	12.375	8.5	5.47398	3.78899	-1.68499	0	0.29777	1.12825	-0.501739
0000005_36.tif	control	N2	wt	12.573	8.562	5.47398	3.60247	-1.87151	0	0.29777	1.07271	-0.557279
0000005_36.tif	control	N2	wt	14.615	8.74	5.47398	2.39117	-3.08281	0	0.29777	0.712019	-0.917967
0000005_36.tif	control	N2	wt	14.99	8.453	5.47398	2.62059	-2.85339	0	0.29777	0.780332	-0.849654
0000005_36.tif	control	N2	wt	15.109	8.484	5.47398	2.58452	-2.88945	0	0.29777	0.769593	-0.860393
0000005_36.tif	control	N2	wt	14.823	6.531	5.47398	4.54957	-0.924404	0	0.29777	1.35473	-0.27526
0000005_36.tif	control	N2	wt	14.901	6.417	5.47398	4.65826	-0.815715	0	0.29777	1.38709	-0.242895
0000005_36.tif	control	N2	wt	15.802	7.286	5.47398	3.83594	-1.63804	0	0.29777	1.14223	-0.487759
0000005_36.tif	control	N2	wt	16.37	8.016	5.47398	3.28274	-2.19124	0	0.29777	0.977502	-0.652484
0000005_36.tif	control	N2	wt	15.307	7.724	5.47398	3.34719	-2.12679	0	0.29777	0.996691	-0.633295
0000005_36.tif	control	N2	wt	15.385	7.641	5.47398	3.43431	-2.03966	0	0.29777	1.02264	-0.607351
0000005_36.tif	control	N2	wt	15.271	7.521	5.47398	3.54871	-1.92527	0	0.29777	1.0567	-0.573288
0000005_36.tif	control	N2	wt	15.354	9.323	5.47398	1.75564	-3.71834	0	0.29777	0.522777	-1.10721
0000005_36.tif	control	N2	wt	15.958	9.422	5.47398	1.8288	-3.64517	0	0.29777	0.544563	-1.08542
0000005_36.tif	control	N2	wt	16.578	9.365	5.47398	2.21542	-3.25855	0	0.29777	0.659686	-0.9703
0000005_36.tif	control	N2	wt	16.875	9.406	5.47398	2.38748	-3.0865	0	0.29777	0.710919	-0.919067
0000005_36.tif	control	N2	wt	15.802	9.792	5.47398	1.42796	-4.04602	0	0.29777	0.425202	-1.20478
0000005_36.tif	control	N2	wt	15.927	9.828	5.47398	1.45752	-4.01646	0	0.29777	0.434005	-1.19598
0000005_36.tif	control	N2	wt	15.839	10.182	5.47398	1.11565	-4.35832	0	0.29777	0.332208	-1.29778
0000005_36.tif	control	N2	wt	16.214	10.547	5.47398	1.17484	-4.29914	0	0.29777	0.349832	-1.28015
0000005_36.tif	control	N2	wt	16.344	10.474	5.47398	1.32375	-4.15022	0	0.29777	0.394174	-1.23581
0000005_36.tif	control	N2	wt	16.589	10.115	5.47398	1.7168	-3.75718	0	0.29777	0.511211	-1.11878
0000005_36.tif	control	N2	wt	16.557	10.021	5.47398	1.745	-3.72898	0	0.29777	0.519609	-1.11038
0000005_36.tif	control	N2	wt	16.943	10.734	5.47398	1.81303	-3.66095	0	0.29777	0.539866	-1.09012
0000005_36.tif	control	N2	wt	15.734	10.536	5.47398	0.781891	-4.69209	0	0.29777	0.232824	-1.39716
0000005_36.tif	control	N2	wt	15.255	10.625	5.47398	0.452863	-5.02111	0	0.29777	0.134849	-1.49514
0000005_36.tif	control	N2	wt	15.302	10.828	5.47398	0.278354	-5.19562	0	0.29777	0.0828855	-1.5471
0000005_36.tif	control	N2	wt	15.406	10.849	5.47398	0.328612	-5.14536	0	0.29777	0.0978509	-1.53214
0000005_36.tif	control	N2	wt	15.438	10.927	5.47398	0.310821	-5.16316	0	0.29777	0.0925533	-1.53743
0000005_36.tif	control	N2	wt	15.479	10.766	5.47398	0.438552	-5.03542	0	0.29777	0.130588	-1.4994
0000005_36.tif	control	N2	wt	15.646	10.875	5.47398	0.52199	-4.95199	0	0.29777	0.155433	-1.47455
0000005_36.tif	control	N2	wt	15.776	10.948	5.47398	0.626598	-4.84738	0	0.29777	0.186582	-1.4434
0000005_36.tif	control	N2	wt	15.979	11.359	5.47398	0.868219	-4.60576	0	0.29777	0.25853	-1.37146
0000005_36.tif	control	N2	wt	16.208	11.125	5.47398	1.04855	-4.42543	0	0.29777	0.312227	-1.31776
0000005_36.tif	control	N2	wt	16.203	11.443	5.47398	1.10742	-4.36655	0	0.29777	0.329758	-1.30023
0000005_36.tif	control	N2	wt	16.953	11.76	5.47398	1.92097	-3.55301	0	0.29777	0.572007	-1.05798
0000005_36.tif	control	N2	wt	15.151	11.135	5.47398	0.0677422	-5.40623	0	0.29777	0.0201716	-1.60981
0000005_36.tif	control	N2	wt	15.182	11.01	5.47398	0.0616847	-5.41229	0	0.29777	0.0183678	-1.61162
0000005_36.tif	control	N2	wt	15.344	11.161	5.47398	0.205275	-5.2687	0	0.29777	0.0611249	-1.56886
0000005_36.tif	control	N2	wt	15.422	11.333	5.47398	0.371949	-5.10203	0	0.29777	0.110755	-1.51923
0000005_36.tif	control	N2	wt	15.359	12.438	5.47398	1.38423	-4.08974	0	0.29777	0.412183	-1.2178
0000005_36.tif	control	N2	wt	15.583	12.406	5.47398	1.40297	-4.07101	0	0.29777	0.417763	-1.21222
0000005_36.tif	control	N2	wt	15.698	12.589	5.47398	1.61301	-3.86096	0	0.29777	0.480307	-1.14968
0000005_36.tif	control	N2	wt	16.141	12.161	5.47398	1.46801	-4.00597	0	0.29777	0.437129	-1.19286
0000005_36.tif	control	N2	wt	16.26	12.63	5.47398	1.90988	-3.5641	0	0.29777	0.568705	-1.06128
0000005_36.tif	control	N2	wt	16.312	12.505	5.47398	1.84113	-3.63284	0	0.29777	0.548234	-1.08175
0000005_36.tif	control	N2	wt	16.562	12.443	5.47398	1.96301	-3.51096	0	0.29777	0.584527	-1.04546
0000005_36.tif	control	N2	wt	16.854	12.448	5.47398	2.18418	-3.2898	0	0.29777	0.650384	-0.979602
0000005_36.tif	control	N2	wt	16.682	12.766	5.47398	2.27962	-3.19436	0	0.29777	0.678801	-0.951185
0000005_36.tif	control	N2	wt	16.63	12.844	5.47398	2.30481	-3.16917	0	0.29777	0.686302	-0.943684
0000005_36.tif	control	N2	wt	15.615	13.396	5.47398	2.37186	-3.10212	0	0.29777	0.706268	-0.923718
0000005_36.tif	control	N2	wt	15.615	13.5	5.47398	2.47401	-2.99996	0	0.29777	0.736687	-0.893299
0000005_36.tif	control	N2	wt	15.255	14.276	5.47398	3.20938	-2.2646	0	0.29777	0.955656	-0.67433
0000005_36.tif	control	N2	wt	15.339	14.865	5.47398	3.80117	-1.67281	0	0.29777	1.13187	-0.498112
0000005_36.tif	control	N2	wt	15.281	14.964	5.47398	3.89785	-1.57613	0	0.29777	1.16066	-0.469324
0000005_36.tif	control	N2	wt	15.953	14.766	5.47398	3.78186	-1.69212	0	0.29777	1.12612	-0.503861
0000005_36.tif	control	N2	wt	16.083	14.599	5.47398	3.64939	-1.82459	0	0.29777	1.08668	-0.543307
0000005_36.tif	control	N2	wt	16.458	14.651	5.47398	3.81052	-1.66345	0	0.29777	1.13466	-0.495326
0000005_36.tif	control	N2	wt	16.823	15.052	5.47398	4.31677	-1.15721	0	0.29777	1.2854	-0.344582
0000005_36.tif	control	N2	wt	16.302	15.156	5.47398	4.24425	-1.22973	0	0.29777	1.26381	-0.366177
0000005_36.tif	control	N2	wt	16.323	15.411	5.47398	4.49576	-0.978213	0	0.29777	1.3387	-0.291282
0000005_36.tif	control	N2	wt	16.438	15.406	5.47398	4.52205	-0.951922	0	0.29777	1.34653	-0.283454
0000005_36.tif	control	N2	wt	16.891	15.693	5.47398	4.93797	-0.536009	0	0.29777	1.47038	-0.159607
0000005_36.tif	control	N2	wt	16.161	15.547	5.47398	4.58927	-0.884702	0	0.29777	1.36655	-0.263438
0000005_36.tif	control	N2	wt	15.323	15.641	5.47398	4.57587	-0.898108	0	0.29777	1.36256	-0.26743
0000005_36.tif	control	N2	wt	15.38	15.536	5.47398	4.47336	-1.00061	0	0.29777	1.33203	-0.297952
0000005_36.tif	control	N2	wt	15.469	15.917	5.47398	4.85877	-0.615205	0	0.29777	1.4468	-0.183189
0000005_36.tif	control	N2	wt	15.422	15.99	5.47398	4.92892	-0.545061	0	0.29777	1.46768	-0.162303
0000005_36.tif	control	N2	wt	17.38	15.781	5.47398	5.20925	-0.264722	0	0.29777	1.55116	-0.0788264
0000005_36.tif	control	N2	wt	17.578	15.5	5.47398	5.04822	-0.425758	0	0.29777	1.50321	-0.126778
0000005_36.tif	control	N2	wt	17.219	14.99	5.47398	4.42916	-1.04482	0	0.29777	1.31887	-0.311115
0000005_36.tif	control	N2	wt	17.922	14.458	5.47398	4.3721	-1.10188	0	0.29777	1.30188	-0.328107
0000005_36.tif	control	N2	wt	17.88	14.312	5.47398	4.23279	-1.24119	0	0.29777	1.2604	-0.369589
0000005_36.tif	control	N2	wt	18.062	14.193	5.47398	4.26397	-1.21001	0	0.29777	1.26968	-0.360304
0000005_36.tif	control	N2	wt	18.688	14.479	5.47398	4.90659	-0.567384	0	0.29777	1.46104	-0.16895
0000005_36.tif	control	N2	wt	18.833	14.276	5.47398	4.87595	-0.598031	0	0.29777	1.45191	-0.178076
0000005_36.tif	control	N2	wt	18.667	14.188	5.47398	4.69323	-0.780744	0	0.29777	1.3975	-0.232482
0000005_36.tif	control	N2	wt	18.719	14.115	5.47398	4.6844	-0.78958	0	0.29777	1.39487	-0.235113
0000005_36.tif	control	N2	wt	19.74	13.766	5.47398	5.31474	-0.159238	0	0.29777	1.58257	-0.0474163
0000005_36.tif	control	N2	wt	19.469	13.385	5.47398	4.89156	-0.582417	0	0.29777	1.45656	-0.173426
0000005_36.tif	control	N2	wt	17.635	13.672	5.47398	3.59186	-1.88211	0	0.29777	1.06955	-0.560436
0000005_36.tif	control	N2	wt	18.068	13.714	5.47398	3.9309	-1.54308	0	0.29777	1.1705	-0.459482
0000005_36.tif	control	N2	wt	18.177	13.635	5.47398	3.96052	-1.51345	0	0.29777	1.17933	-0.450661
0000005_36.tif	control	N2	wt	18.13	13.807	5.47398	4.03944	-1.43454	0	0.29777	1.20282	-0.427162
0000005_36.tif	control	N2	wt	18.661	13.432	5.47398	4.22356	-1.25041	0	0.29777	1.25765	-0.372335
0000005_36.tif	control	N2	wt	18.01	12.938	5.47398	3.40789	-2.06609	0	0.29777	1.01477	-0.615219
0000005_36.tif	control	N2	wt	18.062	13.036	5.47398	3.50554	-1.96843	0	0.29777	1.04385	-0.586141
0000005_36.tif	control	N2	wt	17.839	12.635	5.47398	3.10277	-2.37121	0	0.29777	0.923911	-0.706075
0000005_36.tif	control	N2	wt	18.01	12.474	5.47398	3.17705	-2.29693	0	0.29777	0.94603	-0.683956
0000005_36.tif	control	N2	wt	17.24	11.646	5.47398	2.15785	-3.31612	0	0.29777	0.642544	-0.987442
0000005_36.tif	control	N2	wt	17.135	11.578	5.47398	2.03882	-3.43516	0	0.29777	0.607099	-1.02289
0000005_36.tif	control	N2	wt	18.146	12.146	5.47398	3.17369	-2.30029	0	0.29777	0.94503	-0.684956
0000005_36.tif	control	N2	wt	18.432	12.776	5.47398	3.69008	-1.78389	0	0.29777	1.0988	-0.53119
0000005_36.tif	control	N2	wt	18.734	12.401	5.47398	3.81356	-1.66042	0	0.29777	1.13556	-0.494423
0000005_36.tif	control	N2	wt	18.786	12.312	5.47398	3.83251	-1.64146	0	0.29777	1.14121	-0.488778
0000005_36.tif	control	N2	wt	18.568	12.125	5.47398	3.5672	-1.90678	0	0.29777	1.0622	-0.567782
0000005_36.tif	control	N2	wt	19.031	12.255	5.47398	4.04795	-1.42603	0	0.29777	1.20536	-0.424629
0000005_36.tif	control	N2	wt	18.974	12.005	5.47398	3.92644	-1.54754	0	0.29777	1.16918	-0.46081
0000005_36.tif	control	N2	wt	19.026	11.948	5.47398	3.96392	-1.51006	0	0.29777	1.18034	-0.449651
0000005_36.tif	control	N2	wt	17.557	11.24	5.47398	2.40217	-3.07181	0	0.29777	0.715293	-0.914693
0000005_36.tif	control	N2	wt	17.682	11.099	5.47398	2.52119	-2.95279	0	0.29777	0.750735	-0.879251
0000005_36.tif	control	N2	wt	18.812	11.719	5.47398	3.70858	-1.76539	0	0.29777	1.10431	-0.525681
0000005_36.tif	control	N2	wt	18.62	11.526	5.47398	3.48919	-1.98479	0	0.29777	1.03898	-0.59101
0000005_36.tif	control	N2	wt	18.589	11.417	5.47398	3.44572	-2.02826	0	0.29777	1.02603	-0.603954
0000005_36.tif	control	N2	wt	18.578	11.198	5.47398	3.41947	-2.0545	0	0.29777	1.01822	-0.61177
0000005_36.tif	control	N2	wt	18.906	11.193	5.47398	3.74709	-1.72689	0	0.29777	1.11577	-0.514216
0000005_36.tif	control	N2	wt	18.875	11.047	5.47398	3.71406	-1.75992	0	0.29777	1.10594	-0.524051
0000005_36.tif	control	N2	wt	19	11.109	5.47398	3.83922	-1.63476	0	0.29777	1.1432	-0.486782
0000005_36.tif	control	N2	wt	19.385	10.865	5.47398	4.22888	-1.2451	0	0.29777	1.25923	-0.370754
0000005_36.tif	control	N2	wt	20.005	11.13	5.47398	4.8444	-0.62958	0	0.29777	1.44252	-0.18747
0000005_36.tif	control	N2	wt	19.932	10.958	5.47398	4.77227	-0.701709	0	0.29777	1.42104	-0.208948
0000005_36.tif	control	N2	wt	19.922	10.859	5.47398	4.76559	-0.708391	0	0.29777	1.41905	-0.210938
0000005_36.tif	control	N2	wt	17.109	10.776	5.47398	1.96976	-3.50421	0	0.29777	0.586536	-1.04345
0000005_36.tif	control	N2	wt	17.089	10.458	5.47398	2.0222	-3.45178	0	0.29777	0.60215	-1.02784
0000005_36.tif	control	N2	wt	17.38	10.526	5.47398	2.28423	-3.18974	0	0.29777	0.680176	-0.94981
0000005_36.tif	control	N2	wt	17.411	10.427	5.47398	2.33953	-3.13445	0	0.29777	0.696641	-0.933345
0000005_36.tif	control	N2	wt	17.552	10.432	5.47398	2.47414	-2.99983	0	0.29777	0.736725	-0.893261
0000005_36.tif	control	N2	wt	18.016	10.948	5.47398	2.85752	-2.61646	0	0.29777	0.850884	-0.779102
0000005_36.tif	control	N2	wt	18.172	10.75	5.47398	3.02775	-2.44623	0	0.29777	0.901572	-0.728414
0000005_36.tif	control	N2	wt	18.292	10.901	5.47398	3.13545	-2.33853	0	0.29777	0.933643	-0.696343
0000005_36.tif	control	N2	wt	18.271	11.01	5.47398	3.11054	-2.36344	0	0.29777	0.926226	-0.70376
0000005_36.tif	control	N2	wt	18.302	11.115	5.47398	3.14135	-2.33262	0	0.29777	0.9354	-0.694586
0000005_36.tif	control	N2	wt	18.458	10.599	5.47398	3.33019	-2.14379	0	0.29777	0.991631	-0.638355
0000005_36.tif	control	N2	wt	18.557	10.604	5.47398	3.42755	-2.04642	0	0.29777	1.02062	-0.609364
0000005_36.tif	control	N2	wt	18.391	10.172	5.47398	3.35197	-2.122	0	0.29777	0.998117	-0.631869
0000005_36.tif	control	N2	wt	19.005	10.203	5.47398	3.94012	-1.53385	0	0.29777	1.17325	-0.456736
0000005_36.tif	control	N2	wt	19.068	10.161	5.47398	4.0109	-1.46308	0	0.29777	1.19432	-0.435661
0000005_36.tif	control	N2	wt	17.328	9.599	5.47398	2.61799	-2.85599	0	0.29777	0.779558	-0.850428
0000005_36.tif	control	N2	wt	17.766	9.849	5.47398	2.87611	-2.59787	0	0.29777	0.856418	-0.773568
0000005_36.tif	control	N2	wt	17.927	9.984	5.47398	2.97083	-2.50315	0	0.29777	0.884623	-0.745363
0000005_36.tif	control	N2	wt	18.354	9.714	5.47398	3.46822	-2.00575	0	0.29777	1.03273	-0.597253
0000005_36.tif	control	N2	wt	18.245	9.396	5.47398	3.50808	-1.96589	0	0.29777	1.0446	-0.585384
0000005_36.tif	control	N2	wt	18.292	9.339	5.47398	3.57667	-1.8973	0	0.29777	1.06503	-0.56496
0000005_36.tif	control	N2	wt	18.354	9.276	5.47398	3.66149	-1.81249	0	0.29777	1.09028	-0.539704
0000005_36.tif	control	N2	wt	18.214	9.24	5.47398	3.55843	-1.91555	0	0.29777	1.05959	-0.570394
0000005_36.tif	control	N2	wt	18.365	9.156	5.47398	3.73113	-1.74284	0	0.29777	1.11102	-0.518966
0000005_36.tif	control	N2	wt	18.37	9.062	5.47398	3.7844	-1.68957	0	0.29777	1.12688	-0.503104
0000005_36.tif	control	N2	wt	19.021	9.198	5.47398	4.28911	-1.18486	0	0.29777	1.27717	-0.352816
0000005_36.tif	control	N2	wt	19.172	9.229	5.47398	4.41249	-1.06149	0	0.29777	1.31391	-0.31608
0000005_36.tif	control	N2	wt	19.234	9.641	5.47398	4.31575	-1.15823	0	0.29777	1.2851	-0.344887
0000005_36.tif	control	N2	wt	19.51	9.156	5.47398	4.75074	-0.723235	0	0.29777	1.41463	-0.215358
0000005_36.tif	control	N2	wt	19.745	8.87	5.47398	5.08373	-0.390252	0	0.29777	1.51378	-0.116205
0000005_36.tif	control	N2	wt	19.328	8.286	5.47398	5.01033	-0.463646	0	0.29777	1.49193	-0.13806
0000005_36.tif	control	N2	wt	18.651	8.385	5.47398	4.40211	-1.07186	0	0.29777	1.31082	-0.319169
0000005_36.tif	control	N2	wt	18.495	7.974	5.47398	4.54845	-0.925527	0	0.29777	1.35439	-0.275594
0000005_36.tif	control	N2	wt	18.156	7.891	5.47398	4.36616	-1.10782	0	0.29777	1.30011	-0.329875
0000005_36.tif	control	N2	wt	17.901	8.109	5.47398	4.03278	-1.4412	0	0.29777	1.20084	-0.429146
0000005_36.tif	control	N2	wt	17.552	7.203	5.47398	4.54479	-0.929188	0	0.29777	1.3533	-0.276684
0000005_36.tif	control	N2	wt	20.71	9.811	5.47398	5.68959	0.215615	1	0.29777	1.69419	0.0642036
0000005_36.tif	control	N2	wt	20.988	10.741	5.47398	5.83617	0.362192	1	0.29777	1.73784	0.10785
0000005_36.tif	control	N2	wt	21.12	10.845	5.47398	5.96317	0.489195	1	0.29777	1.77565	0.145667
0000005_36.tif	control	N2	wt	21.224	13.595	5.47398	6.56854	1.09456	1	0.29777	1.95591	0.325928
0000005_36.tif	control	N2	wt	21.425	13.658	5.47398	6.77833	1.30436	1	0.29777	2.01838	0.388398
0000005_36.tif	control	N2	wt	20.307	17.168	5.47398	7.98068	2.50671	1	0.29777	2.37641	0.746422
0000005_36.tif	control	N2	wt	21.002	16.905	5.47398	8.25759	2.78362	1	0.29777	2.45886	0.828878
0000005_36.tif	control	N2	wt	21.127	16.828	5.47398	8.29281	2.81884	1	0.29777	2.46935	0.839365
0000005_36.tif	control	N2	wt	21.321	16.731	5.47398	8.36751	2.89353	1	0.29777	2.49159	0.861606
0000005_36.tif	control	N2	wt	21.446	16.495	5.47398	8.30383	2.82985	1	0.29777	2.47263	0.842645
0000005_36.tif	control	N2	wt	21.12	17.092	5.47398	8.47339	2.99941	1	0.29777	2.52312	0.893134
0000005_36.tif	control	N2	wt	21.071	17.175	5.47398	8.49844	3.02447	1	0.29777	2.53058	0.900596
00000019_2.tif	control	CF2805	d1234	10.099	15.333	5.56255	5.02674	-0.535804	0	0.29777	1.49681	-0.159546
00000019_2.tif	control	CF2805	d1234	10.234	15.318	5.56255	4.9138	-0.648744	0	0.29777	1.46318	-0.193177
00000019_2.tif	control	CF2805	d1234	10.885	15.516	5.56255	4.58366	-0.978889	0	0.29777	1.36488	-0.291484
00000019_2.tif	control	CF2805	d1234	11.047	15.557	5.56255	4.50741	-1.05514	0	0.29777	1.34217	-0.31419
00000019_2.tif	control	CF2805	d1234	12.688	16.672	5.56255	4.724	-0.838549	0	0.29777	1.40667	-0.249695
00000019_2.tif	control	CF2805	d1234	12.547	16.151	5.56255	4.26975	-1.2928	0	0.29777	1.2714	-0.384957
00000019_2.tif	control	CF2805	d1234	11.292	14.729	5.56255	3.73459	-1.82796	0	0.29777	1.11205	-0.544312
00000019_2.tif	control	CF2805	d1234	10.88	14.193	5.56255	3.71733	-1.84522	0	0.29777	1.10691	-0.549451
00000019_2.tif	control	CF2805	d1234	10.333	14.526	5.56255	4.35721	-1.20534	0	0.29777	1.29745	-0.358913
00000019_2.tif	control	CF2805	d1234	10.266	13.969	5.56255	4.13673	-1.42582	0	0.29777	1.23179	-0.424566
00000019_2.tif	control	CF2805	d1234	10.099	13.526	5.56255	4.11579	-1.44676	0	0.29777	1.22556	-0.430802
00000019_2.tif	control	CF2805	d1234	11.172	14.375	5.56255	3.58967	-1.97288	0	0.29777	1.0689	-0.587465
00000019_2.tif	control	CF2805	d1234	12.427	14.474	5.56255	2.8099	-2.75264	0	0.29777	0.836705	-0.819655
00000019_2.tif	control	CF2805	d1234	12.802	14.427	5.56255	2.58091	-2.98164	0	0.29777	0.768517	-0.887843
00000019_2.tif	control	CF2805	d1234	12.969	14.672	5.56255	2.73628	-2.82627	0	0.29777	0.814781	-0.841579
00000019_2.tif	control	CF2805	d1234	12.224	14.182	5.56255	2.69746	-2.86509	0	0.29777	0.803222	-0.853138
00000019_2.tif	control	CF2805	d1234	12.458	14	5.56255	2.40806	-3.15449	0	0.29777	0.717048	-0.939313
00000019_2.tif	control	CF2805	d1234	12.547	13.964	5.56255	2.32465	-3.2379	0	0.29777	0.692212	-0.964149
00000019_2.tif	control	CF2805	d1234	13.036	13.401	5.56255	1.58072	-3.98183	0	0.29777	0.47069	-1.18567
00000019_2.tif	control	CF2805	d1234	13.078	13.484	5.56255	1.62504	-3.93751	0	0.29777	0.483889	-1.17247
00000019_2.tif	control	CF2805	d1234	12.672	13.276	5.56255	1.73407	-3.82848	0	0.29777	0.516355	-1.14001
00000019_2.tif	control	CF2805	d1234	11.984	13.641	5.56255	2.4977	-3.06485	0	0.29777	0.743739	-0.912621
00000019_2.tif	control	CF2805	d1234	11.812	13.24	5.56255	2.42814	-3.13441	0	0.29777	0.723028	-0.933332
00000019_2.tif	control	CF2805	d1234	11.505	13.292	5.56255	2.72639	-2.83616	0	0.29777	0.811836	-0.844524
00000019_2.tif	control	CF2805	d1234	10.484	12.193	5.56255	3.48566	-2.07689	0	0.29777	1.03793	-0.618434
00000019_2.tif	control	CF2805	d1234	11.807	12.391	5.56255	2.1783	-3.38425	0	0.29777	0.648633	-1.00773
00000019_2.tif	control	CF2805	d1234	12.047	12.781	5.56255	2.03087	-3.53168	0	0.29777	0.604731	-1.05163
00000019_2.tif	control	CF2805	d1234	12.24	12.63	5.56255	1.80124	-3.76131	0	0.29777	0.536355	-1.12
00000019_2.tif	control	CF2805	d1234	12.849	12.391	5.56255	1.15115	-4.41139	0	0.29777	0.342779	-1.31358
00000019_2.tif	control	CF2805	d1234	12.932	12.359	5.56255	1.06307	-4.49948	0	0.29777	0.316551	-1.33981
00000019_2.tif	control	CF2805	d1234	11.083	11.167	5.56255	3.04085	-2.5217	0	0.29777	0.905473	-0.750887
00000019_2.tif	control	CF2805	d1234	12.99	10.911	5.56255	1.55956	-4.00299	0	0.29777	0.464391	-1.19197
00000019_2.tif	control	CF2805	d1234	9.938	9.714	5.56255	4.69701	-0.865541	0	0.29777	1.39863	-0.257732
00000019_2.tif	control	CF2805	d1234	10.016	9.771	5.56255	4.60082	-0.961731	0	0.29777	1.36999	-0.286375
00000019_2.tif	control	CF2805	d1234	10.203	10.151	5.56255	4.25199	-1.31056	0	0.29777	1.26612	-0.390245
00000019_2.tif	control	CF2805	d1234	10.271	10.125	5.56255	4.20419	-1.35836	0	0.29777	1.25188	-0.404479
00000019_2.tif	control	CF2805	d1234	11.167	10.109	5.56255	3.45188	-2.11067	0	0.29777	1.02787	-0.628495
00000019_2.tif	control	CF2805	d1234	12.328	10.135	5.56255	2.57934	-2.98321	0	0.29777	0.768049	-0.888311
00000019_2.tif	control	CF2805	d1234	11.729	9.339	5.56255	3.57483	-1.98772	0	0.29777	1.06448	-0.591884
00000019_2.tif	control	CF2805	d1234	12.188	9.307	5.56255	3.33363	-2.22892	0	0.29777	0.992655	-0.663705
00000019_2.tif	control	CF2805	d1234	13.62	7.339	5.56255	4.79871	-0.763841	0	0.29777	1.42891	-0.227449
00000019_2.tif	control	CF2805	d1234	13.958	7.391	5.56255	4.73401	-0.828536	0	0.29777	1.40965	-0.246713
00000019_2.tif	control	CF2805	d1234	14.026	7.349	5.56255	4.77634	-0.786209	0	0.29777	1.42225	-0.234109
00000019_2.tif	control	CF2805	d1234	14.432	7.312	5.56255	4.83522	-0.72733	0	0.29777	1.43978	-0.216577
00000019_2.tif	control	CF2805	d1234	14.661	7.229	5.56255	4.94466	-0.617887	0	0.29777	1.47237	-0.183988
00000019_2.tif	control	CF2805	d1234	14.771	7.552	5.56255	4.64279	-0.919755	0	0.29777	1.38248	-0.273875
00000019_2.tif	control	CF2805	d1234	15.016	8	5.56255	4.2558	-1.30675	0	0.29777	1.26725	-0.389111
00000019_2.tif	control	CF2805	d1234	15.359	8.036	5.56255	4.3188	-1.24375	0	0.29777	1.28601	-0.370352
00000019_2.tif	control	CF2805	d1234	15	8.302	5.56255	3.95958	-1.60297	0	0.29777	1.17904	-0.477315
00000019_2.tif	control	CF2805	d1234	14.37	8.37	5.56255	3.77635	-1.7862	0	0.29777	1.12448	-0.531876
00000019_2.tif	control	CF2805	d1234	13.385	9.094	5.56255	3.08675	-2.4758	0	0.29777	0.919141	-0.737219
00000019_2.tif	control	CF2805	d1234	13.479	9.062	5.56255	3.10195	-2.4606	0	0.29777	0.923666	-0.732694
00000019_2.tif	control	CF2805	d1234	14.156	9.885	5.56255	2.24779	-3.31476	0	0.29777	0.669325	-0.987035
00000019_2.tif	control	CF2805	d1234	15.005	9.312	5.56255	2.99771	-2.56484	0	0.29777	0.892628	-0.763732
00000019_2.tif	control	CF2805	d1234	15.25	9.094	5.56255	3.29058	-2.27197	0	0.29777	0.979836	-0.676524
00000019_2.tif	control	CF2805	d1234	15.359	9.016	5.56255	3.40558	-2.15697	0	0.29777	1.01408	-0.64228
00000019_2.tif	control	CF2805	d1234	15.505	9.276	5.56255	3.23668	-2.32587	0	0.29777	0.963786	-0.692574
00000019_2.tif	control	CF2805	d1234	15.245	9.328	5.56255	3.07431	-2.48824	0	0.29777	0.915437	-0.740923
00000019_2.tif	control	CF2805	d1234	15.24	9.458	5.56255	2.95437	-2.60817	0	0.29777	0.879724	-0.776636
00000019_2.tif	control	CF2805	d1234	15.297	9.536	5.56255	2.90973	-2.65282	0	0.29777	0.866429	-0.789931
00000019_2.tif	control	CF2805	d1234	15.141	9.536	5.56255	2.84192	-2.72063	0	0.29777	0.846238	-0.810122
00000019_2.tif	control	CF2805	d1234	15.234	9.74	5.56255	2.69971	-2.86284	0	0.29777	0.803894	-0.852467
00000019_2.tif	control	CF2805	d1234	15.141	9.766	5.56255	2.6341	-2.92845	0	0.29777	0.784355	-0.872005
00000019_2.tif	control	CF2805	d1234	15.385	9.677	5.56255	2.82803	-2.73452	0	0.29777	0.842103	-0.814257
00000019_2.tif	control	CF2805	d1234	15.578	9.807	5.56255	2.8217	-2.74085	0	0.29777	0.840218	-0.816142
00000019_2.tif	control	CF2805	d1234	13.078	10.323	5.56255	2.01025	-3.5523	0	0.29777	0.598591	-1.05777
00000019_2.tif	control	CF2805	d1234	14.604	10.349	5.56255	1.88611	-3.67644	0	0.29777	0.561626	-1.09473
00000019_2.tif	control	CF2805	d1234	15.151	10.141	5.56255	2.30941	-3.25314	0	0.29777	0.687673	-0.968687
00000019_2.tif	control	CF2805	d1234	15.474	10.583	5.56255	2.15471	-3.40784	0	0.29777	0.641609	-1.01475
00000019_2.tif	control	CF2805	d1234	13.677	10.635	5.56255	1.51834	-4.04421	0	0.29777	0.452117	-1.20424
00000019_2.tif	control	CF2805	d1234	15.557	10.719	5.56255	2.12099	-3.44156	0	0.29777	0.631566	-1.02479
00000019_2.tif	control	CF2805	d1234	13.568	10.911	5.56255	1.27851	-4.28404	0	0.29777	0.380703	-1.27566
00000019_2.tif	control	CF2805	d1234	13.318	11.24	5.56255	1.09865	-4.4639	0	0.29777	0.327144	-1.32922
00000019_2.tif	control	CF2805	d1234	13.495	11.422	5.56255	0.847871	-4.71468	0	0.29777	0.252471	-1.40389
00000019_2.tif	control	CF2805	d1234	13.635	11.349	5.56255	0.844827	-4.71772	0	0.29777	0.251564	-1.4048
00000019_2.tif	control	CF2805	d1234	13.828	11.208	5.56255	0.927777	-4.63477	0	0.29777	0.276264	-1.3801
00000019_2.tif	control	CF2805	d1234	13.12	12.083	5.56255	0.850038	-4.71251	0	0.29777	0.253116	-1.40324
00000019_2.tif	control	CF2805	d1234	14.688	12.125	5.56255	0.719	-4.84355	0	0.29777	0.214097	-1.44226
00000019_2.tif	control	CF2805	d1234	14.807	12.073	5.56255	0.839612	-4.72294	0	0.29777	0.250011	-1.40635
00000019_2.tif	control	CF2805	d1234	14.891	11.76	5.56255	0.991619	-4.57093	0	0.29777	0.295275	-1.36109
00000019_2.tif	control	CF2805	d1234	15.417	11.708	5.56255	1.50685	-4.0557	0	0.29777	0.448694	-1.20767
00000019_2.tif	control	CF2805	d1234	15.432	11.568	5.56255	1.56544	-3.9971	0	0.29777	0.466143	-1.19022
00000019_2.tif	control	CF2805	d1234	15.547	11.661	5.56255	1.6448	-3.91774	0	0.29777	0.489773	-1.16659
00000019_2.tif	control	CF2805	d1234	15.609	11.901	5.56255	1.65523	-3.90732	0	0.29777	0.492877	-1.16348
00000019_2.tif	control	CF2805	d1234	15.464	11.974	5.56255	1.50261	-4.05994	0	0.29777	0.447431	-1.20893
00000019_2.tif	control	CF2805	d1234	15.406	12	5.56255	1.44243	-4.12012	0	0.29777	0.429511	-1.22685
00000019_2.tif	control	CF2805	d1234	15.438	12.432	5.56255	1.50074	-4.06181	0	0.29777	0.446874	-1.20949
00000019_2.tif	control	CF2805	d1234	14.885	12.604	5.56255	1.03368	-4.52887	0	0.29777	0.307799	-1.34856
00000019_2.tif	control	CF2805	d1234	14.969	12.568	5.56255	1.09373	-4.46882	0	0.29777	0.32568	-1.33068
00000019_2.tif	control	CF2805	d1234	14.823	12.771	5.56255	1.07081	-4.49174	0	0.29777	0.318855	-1.33751
00000019_2.tif	control	CF2805	d1234	13.328	12.828	5.56255	0.951362	-4.61119	0	0.29777	0.283287	-1.37307
00000019_2.tif	control	CF2805	d1234	13.146	12.984	5.56255	1.18963	-4.37292	0	0.29777	0.354235	-1.30213
00000019_2.tif	control	CF2805	d1234	13.302	13.443	5.56255	1.47716	-4.08538	0	0.29777	0.439855	-1.21651
00000019_2.tif	control	CF2805	d1234	13.625	13.229	5.56255	1.15635	-4.4062	0	0.29777	0.344327	-1.31203
00000019_2.tif	control	CF2805	d1234	14.12	13.161	5.56255	1.04695	-4.5156	0	0.29777	0.311749	-1.34461
00000019_2.tif	control	CF2805	d1234	15.594	13.859	5.56255	2.37642	-3.18613	0	0.29777	0.707627	-0.948733
00000019_2.tif	control	CF2805	d1234	14.094	13.802	5.56255	1.68165	-3.8809	0	0.29777	0.500746	-1.15561
00000019_2.tif	control	CF2805	d1234	13.995	13.807	5.56255	1.6822	-3.88035	0	0.29777	0.500909	-1.15545
00000019_2.tif	control	CF2805	d1234	13.229	14.87	5.56255	2.843	-2.71955	0	0.29777	0.846559	-0.809801
00000019_2.tif	control	CF2805	d1234	15.37	14.573	5.56255	2.82055	-2.742	0	0.29777	0.839875	-0.816485
00000019_2.tif	control	CF2805	d1234	15.359	15.62	5.56255	3.76127	-1.80128	0	0.29777	1.11999	-0.536368
00000019_2.tif	control	CF2805	d1234	13.12	16.427	5.56255	4.38497	-1.17757	0	0.29777	1.30571	-0.350646
00000019_2.tif	control	CF2805	d1234	13.49	16.359	5.56255	4.26101	-1.30154	0	0.29777	1.2688	-0.38756
00000019_2.tif	control	CF2805	d1234	13.557	16.276	5.56255	4.1714	-1.39115	0	0.29777	1.24212	-0.414244
00000019_2.tif	control	CF2805	d1234	13.547	16.599	5.56255	4.49386	-1.06869	0	0.29777	1.33814	-0.318224
00000019_2.tif	control	CF2805	d1234	13.453	16.724	5.56255	4.62786	-0.934692	0	0.29777	1.37804	-0.278323
00000019_2.tif	control	CF2805	d1234	13.922	16.922	5.56255	4.79723	-0.765319	0	0.29777	1.42847	-0.227889
00000019_2.tif	control	CF2805	d1234	14.026	17.255	5.56255	5.13032	-0.432232	0	0.29777	1.52765	-0.128706
00000019_2.tif	control	CF2805	d1234	14.297	17.083	5.56255	4.96884	-0.593711	0	0.29777	1.47957	-0.176789
00000019_2.tif	control	CF2805	d1234	14.427	17.036	5.56255	4.93231	-0.630238	0	0.29777	1.46869	-0.187666
00000019_2.tif	control	CF2805	d1234	14.391	16.818	5.56255	4.71194	-0.850614	0	0.29777	1.40307	-0.253287
00000019_2.tif	control	CF2805	d1234	14.641	16.495	5.56255	4.42137	-1.14118	0	0.29777	1.31655	-0.33981
00000019_2.tif	control	CF2805	d1234	14.807	16.12	5.56255	4.08194	-1.4806	0	0.29777	1.21548	-0.44088
00000019_2.tif	control	CF2805	d1234	14.714	15.974	5.56255	3.92044	-1.64211	0	0.29777	1.16739	-0.488972
00000019_2.tif	control	CF2805	d1234	14.974	16.422	5.56255	4.41296	-1.14959	0	0.29777	1.31405	-0.342312
00000019_2.tif	control	CF2805	d1234	15.286	16.427	5.56255	4.49908	-1.06347	0	0.29777	1.33969	-0.31667
00000019_2.tif	control	CF2805	d1234	15.411	16.62	5.56255	4.72063	-0.841914	0	0.29777	1.40566	-0.250697
00000019_2.tif	control	CF2805	d1234	15.406	16.703	5.56255	4.79823	-0.764314	0	0.29777	1.42877	-0.22759
00000019_2.tif	control	CF2805	d1234	15.401	17.125	5.56255	5.20102	-0.361527	0	0.29777	1.54871	-0.107652
00000019_2.tif	control	CF2805	d1234	16.229	19.229	5.56255	7.45483	1.89228	1	0.29777	2.21982	0.563463
00000019_2.tif	control	CF2805	d1234	16.24	18.745	5.56255	6.9987	1.43615	1	0.29777	2.084	0.427644
00000019_2.tif	control	CF2805	d1234	15.724	18.318	5.56255	6.43687	0.87432	1	0.29777	1.91671	0.260346
00000019_2.tif	control	CF2805	d1234	15.823	18.245	5.56255	6.39466	0.832114	1	0.29777	1.90414	0.247779
00000019_2.tif	control	CF2805	d1234	15.859	17.141	5.56255	5.36026	-0.202292	0	0.29777	1.59612	-0.0602364
00000019_2.tif	control	CF2805	d1234	15.969	17.099	5.56255	5.36103	-0.201516	0	0.29777	1.59635	-0.0600053
00000019_2.tif	control	CF2805	d1234	16.047	16.974	5.56255	5.2755	-0.28705	0	0.29777	1.57089	-0.0854749
00000019_2.tif	control	CF2805	d1234	16.099	16.344	5.56255	4.72619	-0.83636	0	0.29777	1.40732	-0.249043
00000019_2.tif	control	CF2805	d1234	17.938	17.094	5.56255	6.35955	0.797005	1	0.29777	1.89368	0.237324
00000019_2.tif	control	CF2805	d1234	17.99	17.078	5.56255	6.37971	0.817157	1	0.29777	1.89969	0.243325
00000019_2.tif	control	CF2805	d1234	16.677	15.932	5.56255	4.67189	-0.890663	0	0.29777	1.39115	-0.265213
00000019_2.tif	control	CF2805	d1234	16.771	15.922	5.56255	4.71894	-0.843607	0	0.29777	1.40516	-0.251201
00000019_2.tif	control	CF2805	d1234	16.771	14.948	5.56255	3.9775	-1.58505	0	0.29777	1.18438	-0.471979
00000019_2.tif	control	CF2805	d1234	16.021	13.771	5.56255	2.63059	-2.93196	0	0.29777	0.783312	-0.873048
00000019_2.tif	control	CF2805	d1234	16.094	13.745	5.56255	2.67208	-2.89047	0	0.29777	0.795666	-0.860694
00000019_2.tif	control	CF2805	d1234	15.714	13.099	5.56255	1.99842	-3.56412	0	0.29777	0.595071	-1.06129
00000019_2.tif	control	CF2805	d1234	15.75	13.016	5.56255	1.99144	-3.57111	0	0.29777	0.592992	-1.06337
00000019_2.tif	control	CF2805	d1234	17.047	14.146	5.56255	3.68219	-1.88036	0	0.29777	1.09645	-0.559914
00000019_2.tif	control	CF2805	d1234	16.771	12.599	5.56255	2.84181	-2.72074	0	0.29777	0.846206	-0.810155
00000019_2.tif	control	CF2805	d1234	16.036	11.948	5.56255	2.07456	-3.48798	0	0.29777	0.617743	-1.03862
00000019_2.tif	control	CF2805	d1234	16.109	11.958	5.56255	2.14651	-3.41604	0	0.29777	0.639165	-1.01719
00000019_2.tif	control	CF2805	d1234	15.688	11.344	5.56255	1.8881	-3.67445	0	0.29777	0.56222	-1.09414
00000019_2.tif	control	CF2805	d1234	16.036	11.286	5.56255	2.23079	-3.33176	0	0.29777	0.664261	-0.992099
00000019_2.tif	control	CF2805	d1234	15.781	11.099	5.56255	2.08231	-3.48024	0	0.29777	0.62005	-1.03631
00000019_2.tif	control	CF2805	d1234	15.698	10.953	5.56255	2.08879	-3.47376	0	0.29777	0.621978	-1.03438
00000019_2.tif	control	CF2805	d1234	15.646	10.479	5.56255	2.34982	-3.21273	0	0.29777	0.699705	-0.956655
00000019_2.tif	control	CF2805	d1234	16.12	10.865	5.56255	2.49287	-3.06968	0	0.29777	0.742302	-0.914058
00000019_2.tif	control	CF2805	d1234	15.979	9.703	5.56255	3.14741	-2.41514	0	0.29777	0.937204	-0.719156
00000019_2.tif	control	CF2805	d1234	16.099	9.906	5.56255	3.07585	-2.4867	0	0.29777	0.915896	-0.740464
00000019_2.tif	control	CF2805	d1234	16.615	10.469	5.56255	3.12148	-2.44107	0	0.29777	0.929484	-0.726876
00000019_2.tif	control	CF2805	d1234	16.714	10.438	5.56255	3.22195	-2.34059	0	0.29777	0.959402	-0.696959
00000019_2.tif	control	CF2805	d1234	17.323	10.292	5.56255	3.8222	-1.74035	0	0.29777	1.13814	-0.518224
00000019_2.tif	control	CF2805	d1234	17.359	10.005	5.56255	3.99831	-1.56424	0	0.29777	1.19058	-0.465783
00000019_2.tif	control	CF2805	d1234	17.589	10.109	5.56255	4.14351	-1.41904	0	0.29777	1.23381	-0.422548
00000019_2.tif	control	CF2805	d1234	17.682	10.115	5.56255	4.22214	-1.34041	0	0.29777	1.25723	-0.399133
00000019_2.tif	control	CF2805	d1234	17.672	10.193	5.56255	4.1767	-1.38585	0	0.29777	1.2437	-0.412664
00000019_2.tif	control	CF2805	d1234	16.927	9.651	5.56255	3.85622	-1.70633	0	0.29777	1.14827	-0.508093
00000019_2.tif	control	CF2805	d1234	16.922	8.698	5.56255	4.52377	-1.03877	0	0.29777	1.34704	-0.309316
00000019_2.tif	control	CF2805	d1234	21.071	10.911	5.56255	7.20501	1.64246	1	0.29777	2.14544	0.489076
00000019_2.tif	control	CF2805	d1234	18.292	13.385	5.56255	4.50288	-1.05967	0	0.29777	1.34082	-0.315538
00000019_2.tif	control	CF2805	d1234	18.484	12.943	5.56255	4.5885	-0.974047	0	0.29777	1.36632	-0.290042
00000019_2.tif	control	CF2805	d1234	18.693	13.021	5.56255	4.80822	-0.754328	0	0.29777	1.43174	-0.224616
00000019_2.tif	control	CF2805	d1234	18.745	12.786	5.56255	4.82152	-0.741024	0	0.29777	1.43571	-0.220655
00000019_2.tif	control	CF2805	d1234	19.25	12.974	5.56255	5.34881	-0.213739	0	0.29777	1.59271	-0.0636452
00000019_2.tif	control	CF2805	d1234	18.458	14.047	5.56255	4.88316	-0.679394	0	0.29777	1.45406	-0.202303
00000021_8.tif	predator	CF2805	d1234	8.969	20.542	6.24487	10.0618	3.81691	1	0.29777	2.9961	1.13656
00000021_8.tif	predator	CF2805	d1234	9.012	20.474	6.24487	9.98143	3.73656	1	0.29777	2.97217	1.11263
00000021_8.tif	predator	CF2805	d1234	8.568	16.811	6.24487	7.65521	1.41034	1	0.29777	2.27949	0.419958
00000021_8.tif	predator	CF2805	d1234	7.477	16.13	6.24487	8.22562	1.98075	1	0.29777	2.44934	0.589809
00000021_8.tif	predator	CF2805	d1234	4.443	13.793	6.24487	10.4278	4.18298	1	0.29777	3.1051	1.24557
00000021_8.tif	predator	CF2805	d1234	9.102	13.349	6.24487	5.75707	-0.487798	0	0.29777	1.71428	-0.145251
00000021_8.tif	predator	CF2805	d1234	4.943	11.571	6.24487	9.85136	3.60649	1	0.29777	2.93344	1.07391
00000021_8.tif	predator	CF2805	d1234	3.998	10.071	6.24487	10.9999	4.75508	1	0.29777	3.27545	1.41592
00000021_8.tif	predator	CF2805	d1234	4.054	10.12	6.24487	10.9352	4.69031	1	0.29777	3.25617	1.39663
00000021_8.tif	predator	CF2805	d1234	8.575	9.418	6.24487	6.83655	0.591687	1	0.29777	2.03572	0.176187
00000021_8.tif	predator	CF2805	d1234	8.151	8.911	6.24487	7.44082	1.19596	1	0.29777	2.21565	0.35612
00000021_8.tif	predator	CF2805	d1234	8.859	8.911	6.24487	6.81911	0.574245	1	0.29777	2.03053	0.170993
00000021_8.tif	predator	CF2805	d1234	8.769	6.745	6.24487	8.18672	1.94185	1	0.29777	2.43776	0.578225
00000021_8.tif	predator	CF2805	d1234	6.832	4.224	6.24487	11.3341	5.0892	1	0.29777	3.37495	1.51541
00000021_8.tif	predator	CF2805	d1234	6.908	4.245	6.24487	11.2659	5.02108	1	0.29777	3.35466	1.49513
00000021_8.tif	predator	CF2805	d1234	12.373	6.505	6.24487	6.28629	0.0414204	1	0.29777	1.87187	0.0123338
00000021_8.tif	predator	CF2805	d1234	12.325	6.595	6.24487	6.22183	-0.0230343	0	0.29777	1.85268	-0.00685894
00000021_8.tif	predator	CF2805	d1234	9.464	6.773	6.24487	7.67191	1.42704	1	0.29777	2.28447	0.424931
00000021_8.tif	predator	CF2805	d1234	9.491	6.932	6.24487	7.53887	1.29401	1	0.29777	2.24485	0.385316
00000021_8.tif	predator	CF2805	d1234	9.873	6.78	6.24487	7.38992	1.14505	1	0.29777	2.2005	0.340962
00000021_8.tif	predator	CF2805	d1234	10.894	6.231	6.24487	7.21415	0.969282	1	0.29777	2.14816	0.288623
00000021_8.tif	predator	CF2805	d1234	11.991	7.425	6.24487	5.62513	-0.619739	0	0.29777	1.67499	-0.18454
00000021_8.tif	predator	CF2805	d1234	12.373	7.488	6.24487	5.3903	-0.854566	0	0.29777	1.60507	-0.254464
00000021_8.tif	predator	CF2805	d1234	10.241	9.717	6.24487	5.21927	-1.02559	0	0.29777	1.55414	-0.305391
00000021_8.tif	predator	CF2805	d1234	11.811	10.266	6.24487	3.5976	-2.64727	0	0.29777	1.07126	-0.788277
00000021_8.tif	predator	CF2805	d1234	9.359	11.696	6.24487	5.44266	-0.802209	0	0.29777	1.62066	-0.238874
00000021_8.tif	predator	CF2805	d1234	9.658	11.8	6.24487	5.1342	-1.11067	0	0.29777	1.52881	-0.330724
00000021_8.tif	predator	CF2805	d1234	9.977	11.849	6.24487	4.81191	-1.43296	0	0.29777	1.43284	-0.426692
00000021_8.tif	predator	CF2805	d1234	11.575	12.616	6.24487	3.20488	-3.03998	0	0.29777	0.954318	-0.905216
00000021_8.tif	predator	CF2805	d1234	9.658	14.234	6.24487	5.45552	-0.789346	0	0.29777	1.62449	-0.235043
00000021_8.tif	predator	CF2805	d1234	9.755	14.436	6.24487	5.44022	-0.804643	0	0.29777	1.61994	-0.239599
00000021_8.tif	predator	CF2805	d1234	11.845	14.589	6.24487	3.69996	-2.54491	0	0.29777	1.10174	-0.757798
00000021_8.tif	predator	CF2805	d1234	12.464	15.415	6.24487	3.85884	-2.38603	0	0.29777	1.14905	-0.710489
00000021_8.tif	predator	CF2805	d1234	13.276	15.116	6.24487	3.17	-3.07487	0	0.29777	0.943931	-0.915603
00000021_8.tif	predator	CF2805	d1234	9.512	15.79	6.24487	6.29756	0.0526953	1	0.29777	1.87523	0.0156911
00000021_8.tif	predator	CF2805	d1234	9.665	15.901	6.24487	6.23363	-0.0112419	0	0.29777	1.85619	-0.00334751
00000021_8.tif	predator	CF2805	d1234	9.783	15.943	6.24487	6.16205	-0.0828133	0	0.29777	1.83487	-0.0246593
00000021_8.tif	predator	CF2805	d1234	9.595	16.144	6.24487	6.43254	0.187668	1	0.29777	1.91542	0.0558819
00000021_8.tif	predator	CF2805	d1234	10.123	15.845	6.24487	5.83071	-0.414158	0	0.29777	1.73621	-0.123324
00000021_8.tif	predator	CF2805	d1234	11.943	16.325	6.24487	4.90157	-1.3433	0	0.29777	1.45954	-0.399994
00000021_8.tif	predator	CF2805	d1234	12.019	16.387	6.24487	4.90946	-1.33541	0	0.29777	1.46189	-0.397645
00000021_8.tif	predator	CF2805	d1234	10.276	17.45	6.24487	6.81891	0.574042	1	0.29777	2.03047	0.170932
00000021_8.tif	predator	CF2805	d1234	10.575	17.241	6.24487	6.46532	0.220456	1	0.29777	1.92518	0.0656452
00000021_8.tif	predator	CF2805	d1234	11.63	17.783	6.24487	6.30085	0.0559831	1	0.29777	1.8762	0.0166701
00000021_8.tif	predator	CF2805	d1234	12.651	17.498	6.24487	5.59514	-0.649725	0	0.29777	1.66607	-0.193469
00000021_8.tif	predator	CF2805	d1234	10.776	19.97	6.24487	8.62979	2.38492	1	0.29777	2.56969	0.710157
00000021_8.tif	predator	CF2805	d1234	10.783	20.519	6.24487	9.11705	2.87219	1	0.29777	2.71479	0.855251
00000021_8.tif	predator	CF2805	d1234	17.606	17.832	6.24487	6.2024	-0.0424652	0	0.29777	1.84689	-0.0126449
00000021_8.tif	predator	CF2805	d1234	16.814	17.283	6.24487	5.3708	-0.874064	0	0.29777	1.59926	-0.26027
00000021_8.tif	predator	CF2805	d1234	16.627	16.811	6.24487	4.86316	-1.3817	0	0.29777	1.4481	-0.41143
00000021_8.tif	predator	CF2805	d1234	17.293	17.144	6.24487	5.44757	-0.797299	0	0.29777	1.62212	-0.237412
00000021_8.tif	predator	CF2805	d1234	17.37	16.609	6.24487	5.01931	-1.22556	0	0.29777	1.4946	-0.364934
00000021_8.tif	predator	CF2805	d1234	15.585	15.38	6.24487	3.16964	-3.07523	0	0.29777	0.943823	-0.915711
00000021_8.tif	predator	CF2805	d1234	14.356	14.509	6.24487	2.22903	-4.01584	0	0.29777	0.663739	-1.1958
00000021_8.tif	predator	CF2805	d1234	15.377	11.387	6.24487	1.11359	-5.13128	0	0.29777	0.331594	-1.52794
00000021_8.tif	predator	CF2805	d1234	14.988	9.773	6.24487	2.55466	-3.6902	0	0.29777	0.760702	-1.09883
00000021_8.tif	predator	CF2805	d1234	15.293	9.648	6.24487	2.72151	-3.52336	0	0.29777	0.810385	-1.04915
00000021_8.tif	predator	CF2805	d1234	14.467	7.852	6.24487	4.476	-1.76887	0	0.29777	1.33282	-0.526716
00000021_8.tif	predator	CF2805	d1234	14.516	7.498	6.24487	4.82648	-1.41839	0	0.29777	1.43718	-0.422354
00000021_8.tif	predator	CF2805	d1234	13.828	6.144	6.24487	6.24485	-2.02e-05	0	0.29777	1.85953	-6.01495e-06
00000021_8.tif	predator	CF2805	d1234	13.925	6.165	6.24487	6.21021	-0.0346591	0	0.29777	1.84921	-0.0103205
00000021_8.tif	predator	CF2805	d1234	15.432	5.269	6.24487	7.08039	0.835525	1	0.29777	2.10833	0.248794
00000021_8.tif	predator	CF2805	d1234	16.168	2.116	6.24487	10.2979	4.05302	1	0.29777	3.0664	1.20687
00000021_8.tif	predator	CF2805	d1234	20.932	4.283	6.24487	10.1282	3.88335	1	0.29777	3.01588	1.15634
00000021_8.tif	predator	CF2805	d1234	21.627	5.488	6.24487	9.68102	3.43616	1	0.29777	2.88272	1.02318
00000021_8.tif	predator	CF2805	d1234	22.356	7.175	6.24487	9.16834	2.92348	1	0.29777	2.73006	0.870524
00000021_8.tif	predator	CF2805	d1234	22.057	7.356	6.24487	8.8193	2.57444	1	0.29777	2.62612	0.76659
00000021_8.tif	predator	CF2805	d1234	20.939	7.328	6.24487	7.93763	1.69277	1	0.29777	2.36359	0.504055
00000021_8.tif	predator	CF2805	d1234	20.842	7.411	6.24487	7.81002	1.56515	1	0.29777	2.32559	0.466056
00000021_8.tif	predator	CF2805	d1234	18.266	6.703	6.24487	6.61651	0.371644	1	0.29777	1.9702	0.110664
00000021_8.tif	predator	CF2805	d1234	18.405	9.29	6.24487	4.73404	-1.51083	0	0.29777	1.40965	-0.44988
00000021_8.tif	predator	CF2805	d1234	17.932	10.637	6.24487	3.58459	-2.66027	0	0.29777	1.06738	-0.79215
00000021_8.tif	predator	CF2805	d1234	18.057	10.811	6.24487	3.61963	-2.62524	0	0.29777	1.07782	-0.781717
00000021_8.tif	predator	CF2805	d1234	18.398	10.998	6.24487	3.86443	-2.38044	0	0.29777	1.15071	-0.708823
00000021_8.tif	predator	CF2805	d1234	18.835	10.95	6.24487	4.29281	-1.95206	0	0.29777	1.27827	-0.581265
00000021_8.tif	predator	CF2805	d1234	18.696	9.686	6.24487	4.72994	-1.51493	0	0.29777	1.40843	-0.4511
00000021_8.tif	predator	CF2805	d1234	18.814	9.561	6.24487	4.89769	-1.34718	0	0.29777	1.45838	-0.40115
00000021_8.tif	predator	CF2805	d1234	18.939	9.95	6.24487	4.79806	-1.44681	0	0.29777	1.42872	-0.430817
00000021_8.tif	predator	CF2805	d1234	20.03	10.012	6.24487	5.74694	-0.497927	0	0.29777	1.71127	-0.148268
00000021_8.tif	predator	CF2805	d1234	20.21	10.172	6.24487	5.85171	-0.393163	0	0.29777	1.74246	-0.117072
00000021_8.tif	predator	CF2805	d1234	19.988	11.179	6.24487	5.34477	-0.900094	0	0.29777	1.59151	-0.268021
00000021_8.tif	predator	CF2805	d1234	20.689	11.248	6.24487	6.01887	-0.225995	0	0.29777	1.79224	-0.0672945
00000021_8.tif	predator	CF2805	d1234	20.592	11.033	6.24487	5.96603	-0.278839	0	0.29777	1.7765	-0.0830298
00000021_8.tif	predator	CF2805	d1234	21.12	11.505	6.24487	6.4058	0.160933	1	0.29777	1.90746	0.0479211
00000021_8.tif	predator	CF2805	d1234	19.981	12.144	6.24487	5.2179	-1.02697	0	0.29777	1.55373	-0.3058
00000021_8.tif	predator	CF2805	d1234	19.766	12.269	6.24487	5.00024	-1.24463	0	0.29777	1.48892	-0.370613
00000021_8.tif	predator	CF2805	d1234	19.21	12.498	6.24487	4.44764	-1.79722	0	0.29777	1.32437	-0.535159
00000021_8.tif	predator	CF2805	d1234	19.377	16.21	6.24487	6.03399	-0.210882	0	0.29777	1.79674	-0.0627943
00000021_8.tif	predator	CF2805	d1234	22.523	17.349	6.24487	9.24565	3.00078	1	0.29777	2.75308	0.893542
00000021_8.tif	predator	CF2805	d1234	19.87	19.533	6.24487	8.83782	2.59295	1	0.29777	2.63164	0.772103
00000021_8.tif	predator	CF2805	d1234	24.026	10.901	6.24487	9.36779	3.12292	1	0.29777	2.78945	0.929913
00000021_8.tif	predator	CF2805	d1234	23.359	11.276	6.24487	8.65595	2.41108	1	0.29777	2.57748	0.717947
00000021_8.tif	predator	CF2805	d1234	23.536	11.995	6.24487	8.77595	2.53108	1	0.29777	2.61321	0.753679
0000021_10.tif	predator	CF2805	d1234	4.292	7.396	6.08337	8.14256	2.05919	1	0.29777	2.42461	0.613166
0000021_10.tif	predator	CF2805	d1234	4.835	7.231	6.08337	7.80349	1.72012	1	0.29777	2.32365	0.512201
0000021_10.tif	predator	CF2805	d1234	4.849	7.321	6.08337	7.73723	1.65386	1	0.29777	2.30392	0.492471
0000021_10.tif	predator	CF2805	d1234	5.891	7.675	6.08337	6.7051	0.621739	1	0.29777	1.99658	0.185135
0000021_10.tif	predator	CF2805	d1234	2.911	9.714	6.08337	8.39715	2.31379	1	0.29777	2.50042	0.688977
0000021_10.tif	predator	CF2805	d1234	5.766	11.054	6.08337	5.3058	-0.777566	0	0.29777	1.57991	-0.231536
0000021_10.tif	predator	CF2805	d1234	5.835	11.158	6.08337	5.21941	-0.863961	0	0.29777	1.55418	-0.257262
0000021_10.tif	predator	CF2805	d1234	6.05	10.859	6.08337	5.06898	-1.01439	0	0.29777	1.50939	-0.302055
0000021_10.tif	predator	CF2805	d1234	5.071	11.568	6.08337	5.92698	-0.156382	0	0.29777	1.76488	-0.0465659
0000021_10.tif	predator	CF2805	d1234	2.898	11.408	6.08337	8.10583	2.02247	1	0.29777	2.41367	0.60223
0000021_10.tif	predator	CF2805	d1234	3.002	11.422	6.08337	8.00106	1.91769	1	0.29777	2.38248	0.571031
0000021_10.tif	predator	CF2805	d1234	4.655	12.356	6.08337	6.33179	0.248424	1	0.29777	1.88542	0.0739733
0000021_10.tif	predator	CF2805	d1234	4.655	12.863	6.08337	6.37707	0.293703	1	0.29777	1.8989	0.0874561
0000021_10.tif	predator	CF2805	d1234	5.925	17.224	6.08337	7.23851	1.15514	1	0.29777	2.15541	0.343967
0000021_10.tif	predator	CF2805	d1234	6.127	19.026	6.08337	8.50401	2.42064	1	0.29777	2.53224	0.720795
0000021_10.tif	predator	CF2805	d1234	7.106	19.568	6.08337	8.46409	2.38072	1	0.29777	2.52035	0.708908
0000021_10.tif	predator	CF2805	d1234	7.266	19.519	6.08337	8.34817	2.2648	1	0.29777	2.48583	0.67439
0000021_10.tif	predator	CF2805	d1234	9.342	20.269	6.08337	8.38828	2.30492	1	0.29777	2.49778	0.686335
0000021_10.tif	predator	CF2805	d1234	11.543	20.908	6.08337	8.88392	2.80055	1	0.29777	2.64537	0.833921
0000021_10.tif	predator	CF2805	d1234	9.543	17.484	6.08337	5.62827	-0.455093	0	0.29777	1.67593	-0.135513
0000021_10.tif	predator	CF2805	d1234	9.516	17.144	6.08337	5.30761	-0.775752	0	0.29777	1.58045	-0.230996
0000021_10.tif	predator	CF2805	d1234	11.842	14.568	6.08337	2.66935	-3.41401	0	0.29777	0.794853	-1.01659
0000021_10.tif	predator	CF2805	d1234	6.849	13.13	6.08337	4.27091	-1.81246	0	0.29777	1.27175	-0.539696
0000021_10.tif	predator	CF2805	d1234	7.231	13.22	6.08337	3.92876	-2.1546	0	0.29777	1.16987	-0.641576
0000021_10.tif	predator	CF2805	d1234	8.106	13.79	6.08337	3.36298	-2.72039	0	0.29777	1.00139	-0.810049
0000021_10.tif	predator	CF2805	d1234	8.161	13.825	6.08337	3.3347	-2.74867	0	0.29777	0.992973	-0.818471
0000021_10.tif	predator	CF2805	d1234	10.78	13.894	6.08337	1.86266	-4.22071	0	0.29777	0.554644	-1.2568
0000021_10.tif	predator	CF2805	d1234	10.724	13.762	6.08337	1.7388	-4.34457	0	0.29777	0.517762	-1.29368
0000021_10.tif	predator	CF2805	d1234	10.474	13.339	6.08337	1.39185	-4.69152	0	0.29777	0.41445	-1.39699
0000021_10.tif	predator	CF2805	d1234	11.134	13.512	6.08337	1.47815	-4.60522	0	0.29777	0.440148	-1.3713
0000021_10.tif	predator	CF2805	d1234	11.106	13.387	6.08337	1.35098	-4.73238	0	0.29777	0.402282	-1.40916
0000021_10.tif	predator	CF2805	d1234	12.21	12.366	6.08337	1.27292	-4.81044	0	0.29777	0.379039	-1.43241
0000021_10.tif	predator	CF2805	d1234	10.925	11.998	6.08337	0.0696563	-6.01371	0	0.29777	0.0207416	-1.7907
0000021_10.tif	predator	CF2805	d1234	10.571	11.97	6.08337	0.414304	-5.66906	0	0.29777	0.123367	-1.68808
0000021_10.tif	predator	CF2805	d1234	10.411	12.026	6.08337	0.568225	-5.51514	0	0.29777	0.1692	-1.64224
0000021_10.tif	predator	CF2805	d1234	8.245	11.464	6.08337	2.79443	-3.28894	0	0.29777	0.832097	-0.979346
0000021_10.tif	predator	CF2805	d1234	6.835	11.276	6.08337	4.2142	-1.86916	0	0.29777	1.25486	-0.556581
0000021_10.tif	predator	CF2805	d1234	6.967	11.151	6.08337	4.10975	-1.97362	0	0.29777	1.22376	-0.587684
0000021_10.tif	predator	CF2805	d1234	7.689	8.585	6.08337	4.77231	-1.31106	0	0.29777	1.42105	-0.390393
0000021_10.tif	predator	CF2805	d1234	7.745	7.807	6.08337	5.3286	-0.754766	0	0.29777	1.5867	-0.224747
0000021_10.tif	predator	CF2805	d1234	7.405	7.651	6.08337	5.66166	-0.421709	0	0.29777	1.68587	-0.125572
0000021_10.tif	predator	CF2805	d1234	6.363	5.401	6.08337	8.08767	2.0043	1	0.29777	2.40826	0.59682
0000021_10.tif	predator	CF2805	d1234	10.523	6.7	6.08337	5.36143	-0.721939	0	0.29777	1.59647	-0.214972
0000021_10.tif	predator	CF2805	d1234	10.266	5.519	6.08337	6.56185	0.478486	1	0.29777	1.95392	0.142479
0000021_10.tif	predator	CF2805	d1234	10.252	5.297	6.08337	6.78407	0.7007	1	0.29777	2.02009	0.208647
0000021_10.tif	predator	CF2805	d1234	10.155	5.186	6.08337	6.90534	0.821973	1	0.29777	2.0562	0.244759
0000021_10.tif	predator	CF2805	d1234	7.064	4.911	6.08337	8.13501	2.05164	1	0.29777	2.42236	0.610918
0000021_10.tif	predator	CF2805	d1234	7.12	4.592	6.08337	8.39014	2.30677	1	0.29777	2.49833	0.686887
0000021_10.tif	predator	CF2805	d1234	7.161	4.349	6.08337	8.58833	2.50496	1	0.29777	2.55735	0.745902
0000021_10.tif	predator	CF2805	d1234	8.835	2.925	6.08337	9.3657	3.28234	1	0.29777	2.78883	0.977382
0000021_10.tif	predator	CF2805	d1234	8.939	2.905	6.08337	9.36196	3.2786	1	0.29777	2.78771	0.976268
0000021_10.tif	predator	CF2805	d1234	8.724	2.766	6.08337	9.54616	3.4628	1	0.29777	2.84256	1.03112
0000021_10.tif	predator	CF2805	d1234	10.78	2.238	6.08337	9.80602	3.72265	1	0.29777	2.91994	1.10849
0000021_10.tif	predator	CF2805	d1234	10.03	1.467	6.08337	10.6175	4.53413	1	0.29777	3.16157	1.35013
0000021_10.tif	predator	CF2805	d1234	12.137	1.752	6.08337	10.355	4.27159	1	0.29777	3.08339	1.27195
0000021_10.tif	predator	CF2805	d1234	13.255	2.036	6.08337	10.2616	4.17822	1	0.29777	3.05559	1.24415
0000021_10.tif	predator	CF2805	d1234	13.38	1.884	6.08337	10.4379	4.35453	1	0.29777	3.10809	1.29665
0000021_10.tif	predator	CF2805	d1234	14.144	2.307	6.08337	10.2366	4.15321	1	0.29777	3.04814	1.2367
0000021_10.tif	predator	CF2805	d1234	12.45	3.571	6.08337	8.59777	2.51441	1	0.29777	2.56016	0.748715
0000021_10.tif	predator	CF2805	d1234	11.512	6.175	6.08337	5.89116	-0.192205	0	0.29777	1.75421	-0.0572329
0000021_10.tif	predator	CF2805	d1234	12.29	5.418	6.08337	6.75249	0.669122	1	0.29777	2.01069	0.199244
0000021_10.tif	predator	CF2805	d1234	12.408	5.391	6.08337	6.80278	0.719416	1	0.29777	2.02566	0.21422
0000021_10.tif	predator	CF2805	d1234	12.533	5.384	6.08337	6.83695	0.753583	1	0.29777	2.03584	0.224395
0000021_10.tif	predator	CF2805	d1234	12.776	6.682	6.08337	5.65321	-0.430154	0	0.29777	1.68336	-0.128087
0000021_10.tif	predator	CF2805	d1234	12.845	6.786	6.08337	5.57741	-0.505957	0	0.29777	1.66079	-0.150659
0000021_10.tif	predator	CF2805	d1234	12.589	7.53	6.08337	4.79064	-1.29272	0	0.29777	1.42651	-0.384935
0000021_10.tif	predator	CF2805	d1234	14.102	6.759	6.08337	6.13704	0.0536704	1	0.29777	1.82743	0.0159814
0000021_10.tif	predator	CF2805	d1234	14.151	6.509	6.08337	6.37775	0.294382	1	0.29777	1.8991	0.0876582
0000021_10.tif	predator	CF2805	d1234	16.04	6.113	6.08337	7.7953	1.71194	1	0.29777	2.32121	0.509764
0000021_10.tif	predator	CF2805	d1234	15.859	7.738	6.08337	6.50683	0.423462	1	0.29777	1.93754	0.126094
0000021_10.tif	predator	CF2805	d1234	15.887	7.856	6.08337	6.45066	0.367297	1	0.29777	1.92081	0.10937
0000021_10.tif	predator	CF2805	d1234	14.165	10.123	6.08337	3.7193	-2.36407	0	0.29777	1.10749	-0.703949
0000021_10.tif	predator	CF2805	d1234	16.602	10.762	6.08337	5.76685	-0.316519	0	0.29777	1.71719	-0.0942498
0000021_10.tif	predator	CF2805	d1234	16.151	11.297	6.08337	5.22538	-0.857985	0	0.29777	1.55596	-0.255482
0000021_10.tif	predator	CF2805	d1234	16.339	11.366	6.08337	5.40246	-0.680906	0	0.29777	1.60869	-0.202753
0000021_10.tif	predator	CF2805	d1234	13.651	11.554	6.08337	2.7162	-3.36717	0	0.29777	0.808802	-1.00264
0000021_10.tif	predator	CF2805	d1234	13.672	14.314	6.08337	3.52338	-2.55998	0	0.29777	1.04916	-0.762286
0000021_10.tif	predator	CF2805	d1234	14.075	15.026	6.08337	4.29994	-1.78343	0	0.29777	1.28039	-0.531051
0000021_10.tif	predator	CF2805	d1234	13.734	15.234	6.08337	4.2165	-1.86686	0	0.29777	1.25555	-0.555896
0000021_10.tif	predator	CF2805	d1234	13.339	16.325	6.08337	4.89016	-1.1932	0	0.29777	1.45614	-0.3553
0000021_10.tif	predator	CF2805	d1234	13.422	17.033	6.08337	5.55683	-0.526539	0	0.29777	1.65466	-0.156787
0000021_10.tif	predator	CF2805	d1234	13.554	17.269	6.08337	5.82685	-0.256518	0	0.29777	1.73506	-0.0763835
0000021_10.tif	predator	CF2805	d1234	13.852	17.255	6.08337	5.95227	-0.131098	0	0.29777	1.77241	-0.039037
0000021_10.tif	predator	CF2805	d1234	18.422	18.394	6.08337	9.785	3.70163	1	0.29777	2.91368	1.10223
0000021_10.tif	predator	CF2805	d1234	18.54	18.38	6.08337	9.86605	3.78268	1	0.29777	2.93781	1.12637
0000021_10.tif	predator	CF2805	d1234	20.019	16.057	6.08337	9.8915	3.80814	1	0.29777	2.94539	1.13395
0000021_10.tif	predator	CF2805	d1234	19.929	12.398	6.08337	8.95708	2.87371	1	0.29777	2.66715	0.855705
0000021_10.tif	predator	CF2805	d1234	18.741	12.21	6.08337	7.76382	1.68045	1	0.29777	2.31183	0.500388
0000021_10.tif	predator	CF2805	d1234	18.762	12.078	6.08337	7.78308	1.69972	1	0.29777	2.31757	0.506125
0000021_10.tif	predator	CF2805	d1234	19.79	9.561	6.08337	9.15364	3.07027	1	0.29777	2.72568	0.914235
0000021_10.tif	predator	CF2805	d1234	17.547	8.901	6.08337	7.28042	1.19705	1	0.29777	2.16789	0.356447
0000021_10.tif	predator	CF2805	d1234	22.21	8.248	6.08337	11.8545	5.77116	1	0.29777	3.52992	1.71848
0000021_10.tif	predator	CF2805	d1234	22.571	14.585	6.08337	11.8677	5.78429	1	0.29777	3.53383	1.72239
0000024_14.tif	predator	CF2805	d1234	3.188	13.5	6.0938	8.59404	2.50024	1	0.29777	2.55905	0.744497
0000024_14.tif	predator	CF2805	d1234	5.422	13.266	6.0938	6.37663	0.282838	1	0.29777	1.89877	0.0842208
0000024_14.tif	predator	CF2805	d1234	5.734	13.321	6.0938	6.09515	0.00135765	1	0.29777	1.81495	0.000404268
0000024_14.tif	predator	CF2805	d1234	6.672	13.286	6.0938	5.19856	-0.89524	0	0.29777	1.54797	-0.266576
0000024_14.tif	predator	CF2805	d1234	7.214	13.905	6.0938	4.97218	-1.12162	0	0.29777	1.48057	-0.333983
0000024_14.tif	predator	CF2805	d1234	6.755	11.884	6.0938	4.79678	-1.29702	0	0.29777	1.42834	-0.386213
0000024_14.tif	predator	CF2805	d1234	7.283	11.599	6.0938	4.25105	-1.84275	0	0.29777	1.26584	-0.548715
0000024_14.tif	predator	CF2805	d1234	6.734	18.172	6.0938	8.26789	2.17409	1	0.29777	2.46193	0.647379
0000024_14.tif	predator	CF2805	d1234	6.7	18.755	6.0938	8.76796	2.67416	1	0.29777	2.61083	0.796285
0000024_14.tif	predator	CF2805	d1234	5.977	11.165	6.0938	5.56071	-0.533091	0	0.29777	1.65581	-0.158738
0000024_14.tif	predator	CF2805	d1234	7.207	9.943	6.0938	4.57515	-1.51865	0	0.29777	1.36234	-0.452207
0000024_14.tif	predator	CF2805	d1234	5.825	8.068	6.0938	6.62686	0.533069	1	0.29777	1.97328	0.158732
0000024_14.tif	predator	CF2805	d1234	6.776	7.394	6.0938	6.24211	0.148316	1	0.29777	1.85871	0.044164
0000024_14.tif	predator	CF2805	d1234	8.974	3.453	6.0938	8.38442	2.29062	1	0.29777	2.49663	0.682079
0000024_14.tif	predator	CF2805	d1234	9.071	3.37	6.0938	8.4347	2.34091	1	0.29777	2.5116	0.697052
0000024_14.tif	predator	CF2805	d1234	9.655	5.516	6.0938	6.21204	0.118246	1	0.29777	1.84976	0.03521
0000024_14.tif	predator	CF2805	d1234	9.773	5.46	6.0938	6.23114	0.137339	1	0.29777	1.85545	0.0408955
0000024_14.tif	predator	CF2805	d1234	10.002	5.405	6.0938	6.22374	0.129943	1	0.29777	1.85324	0.0386932
0000024_14.tif	predator	CF2805	d1234	8.655	5.696	6.0938	6.42199	0.328193	1	0.29777	1.91228	0.097726
0000024_14.tif	predator	CF2805	d1234	7.509	6.648	6.0938	6.25464	0.160849	1	0.29777	1.86245	0.047896
0000024_14.tif	predator	CF2805	d1234	8.606	6.911	6.0938	5.38975	-0.704051	0	0.29777	1.6049	-0.209645
0000024_14.tif	predator	CF2805	d1234	9.099	7.384	6.0938	4.72753	-1.36627	0	0.29777	1.40772	-0.406833
0000024_14.tif	predator	CF2805	d1234	9.328	6.648	6.0938	5.27232	-0.821481	0	0.29777	1.56994	-0.244612
0000024_14.tif	predator	CF2805	d1234	10.488	7.002	6.0938	4.55697	-1.53683	0	0.29777	1.35693	-0.457622
0000024_14.tif	predator	CF2805	d1234	11.495	6.835	6.0938	4.60314	-1.49066	0	0.29777	1.37068	-0.443872
0000024_14.tif	predator	CF2805	d1234	11.703	8.929	6.0938	2.51489	-3.57891	0	0.29777	0.748858	-1.06569
0000024_14.tif	predator	CF2805	d1234	7.28	9.109	6.0938	4.84719	-1.24661	0	0.29777	1.44335	-0.371202
0000024_14.tif	predator	CF2805	d1234	7.863	9.776	6.0938	4.02697	-2.06683	0	0.29777	1.19911	-0.615439
0000024_14.tif	predator	CF2805	d1234	10.752	9.214	6.0938	2.35648	-3.73731	0	0.29777	0.70169	-1.11286
0000024_14.tif	predator	CF2805	d1234	8.342	10.804	6.0938	3.25141	-2.84238	0	0.29777	0.968173	-0.846377
0000024_14.tif	predator	CF2805	d1234	9.189	10.88	6.0938	2.40756	-3.68624	0	0.29777	0.716898	-1.09765
0000024_14.tif	predator	CF2805	d1234	9.696	11.207	6.0938	1.84948	-4.24431	0	0.29777	0.55072	-1.26383
0000024_14.tif	predator	CF2805	d1234	10.418	10.769	6.0938	1.29859	-4.79521	0	0.29777	0.38668	-1.42787
0000024_14.tif	predator	CF2805	d1234	10.641	11.54	6.0938	0.895826	-5.19797	0	0.29777	0.26675	-1.5478
0000024_14.tif	predator	CF2805	d1234	9.536	11.915	6.0938	2.05123	-4.04256	0	0.29777	0.610795	-1.20375
0000024_14.tif	predator	CF2805	d1234	9.655	11.832	6.0938	1.91693	-4.17687	0	0.29777	0.570804	-1.24375
0000024_14.tif	predator	CF2805	d1234	9.786	11.991	6.0938	1.83053	-4.26327	0	0.29777	0.545076	-1.26947
0000024_14.tif	predator	CF2805	d1234	9.884	11.964	6.0938	1.72895	-4.36484	0	0.29777	0.514831	-1.29972
0000024_14.tif	predator	CF2805	d1234	10.057	12.026	6.0938	1.58695	-4.50684	0	0.29777	0.472547	-1.342
0000024_14.tif	predator	CF2805	d1234	9.273	12.102	6.0938	2.35361	-3.74019	0	0.29777	0.700833	-1.11372
0000024_14.tif	predator	CF2805	d1234	9.071	12.72	6.0938	2.77401	-3.31979	0	0.29777	0.826017	-0.988533
0000024_14.tif	predator	CF2805	d1234	9.384	13.04	6.0938	2.67881	-3.41499	0	0.29777	0.797669	-1.01688
0000024_14.tif	predator	CF2805	d1234	10.807	12.818	6.0938	1.55839	-4.53541	0	0.29777	0.464041	-1.35051
0000024_14.tif	predator	CF2805	d1234	11.113	13.22	6.0938	1.83037	-4.26343	0	0.29777	0.545029	-1.26952
0000024_14.tif	predator	CF2805	d1234	11.259	13.047	6.0938	1.63183	-4.46197	0	0.29777	0.48591	-1.32864
0000024_14.tif	predator	CF2805	d1234	11.391	12.873	6.0938	1.44181	-4.65198	0	0.29777	0.429329	-1.38522
0000024_14.tif	predator	CF2805	d1234	11.613	12.977	6.0938	1.54118	-4.55261	0	0.29777	0.458918	-1.35563
0000024_14.tif	predator	CF2805	d1234	11.21	13.519	6.0938	2.10561	-3.98818	0	0.29777	0.626988	-1.18756
0000024_14.tif	predator	CF2805	d1234	10.988	13.748	6.0938	2.37296	-3.72083	0	0.29777	0.706597	-1.10795
0000024_14.tif	predator	CF2805	d1234	8.384	13.894	6.0938	3.99193	-2.10186	0	0.29777	1.18868	-0.625871
0000024_14.tif	predator	CF2805	d1234	8.738	13.769	6.0938	3.63791	-2.45588	0	0.29777	1.08326	-0.731288
0000024_14.tif	predator	CF2805	d1234	7.502	14.651	6.0938	5.15327	-0.940524	0	0.29777	1.53449	-0.28006
0000024_14.tif	predator	CF2805	d1234	8.099	16.252	6.0938	5.91212	-0.181671	0	0.29777	1.76045	-0.0540962
0000024_14.tif	predator	CF2805	d1234	8.12	16.786	6.0938	6.34319	0.249391	1	0.29777	1.88881	0.0742612
0000024_14.tif	predator	CF2805	d1234	9.071	16.641	6.0938	5.75524	-0.338554	0	0.29777	1.71374	-0.100811
0000024_14.tif	predator	CF2805	d1234	11.557	16.349	6.0938	4.91107	-1.18273	0	0.29777	1.46237	-0.352181
0000024_14.tif	predator	CF2805	d1234	10.696	18.2	6.0938	6.81336	0.719564	1	0.29777	2.02881	0.214264
0000024_14.tif	predator	CF2805	d1234	10.648	18.408	6.0938	7.02571	0.931913	1	0.29777	2.09205	0.277496
0000024_14.tif	predator	CF2805	d1234	8.613	18.005	6.0938	7.18611	1.09232	1	0.29777	2.13981	0.325259
0000024_14.tif	predator	CF2805	d1234	8.564	18.061	6.0938	7.25722	1.16342	1	0.29777	2.16098	0.346432
0000024_14.tif	predator	CF2805	d1234	12.043	18.016	6.0938	6.5979	0.5041	1	0.29777	1.96466	0.150106
0000024_14.tif	predator	CF2805	d1234	14.377	17.856	6.0938	7.02072	0.926919	1	0.29777	2.09056	0.276009
0000024_14.tif	predator	CF2805	d1234	14.245	17.599	6.0938	6.73229	0.638493	1	0.29777	2.00467	0.190124
0000024_14.tif	predator	CF2805	d1234	14.391	16.988	6.0938	6.24356	0.149769	1	0.29777	1.85915	0.0445966
0000024_14.tif	predator	CF2805	d1234	13.599	16.519	6.0938	5.48573	-0.60807	0	0.29777	1.63348	-0.181065
0000024_14.tif	predator	CF2805	d1234	13.773	16.436	6.0938	5.47783	-0.615971	0	0.29777	1.63113	-0.183418
0000024_14.tif	predator	CF2805	d1234	12.238	15.873	6.0938	4.491	-1.6028	0	0.29777	1.33728	-0.477265
0000024_14.tif	predator	CF2805	d1234	14.578	15.481	6.0938	5.06261	-1.03118	0	0.29777	1.50749	-0.307055
0000024_14.tif	predator	CF2805	d1234	12.592	14.981	6.0938	3.69846	-2.39534	0	0.29777	1.10129	-0.713261
0000024_14.tif	predator	CF2805	d1234	14.057	11.155	6.0938	2.5418	-3.55199	0	0.29777	0.756873	-1.05768
0000024_14.tif	predator	CF2805	d1234	13.016	8.734	6.0938	3.08494	-3.00886	0	0.29777	0.918602	-0.895948
0000024_14.tif	predator	CF2805	d1234	12.898	8.345	6.0938	3.38162	-2.71218	0	0.29777	1.00694	-0.807605
0000024_14.tif	predator	CF2805	d1234	12.849	7.852	6.0938	3.82054	-2.27326	0	0.29777	1.13764	-0.676908
0000024_14.tif	predator	CF2805	d1234	14.648	8.325	6.0938	4.40528	-1.68852	0	0.29777	1.31176	-0.502791
0000024_14.tif	predator	CF2805	d1234	12.043	6.554	6.0938	4.91076	-1.18303	0	0.29777	1.46228	-0.352272
0000024_14.tif	predator	CF2805	d1234	12.689	6.602	6.0938	4.97271	-1.12108	0	0.29777	1.48072	-0.333825
0000024_14.tif	predator	CF2805	d1234	13.273	6.491	6.0938	5.24475	-0.849049	0	0.29777	1.56173	-0.252821
0000024_14.tif	predator	CF2805	d1234	12.627	5.304	6.0938	6.23115	0.137349	1	0.29777	1.85545	0.0408985
0000024_14.tif	predator	CF2805	d1234	13.113	5.193	6.0938	6.44226	0.348467	1	0.29777	1.91831	0.103763
0000024_14.tif	predator	CF2805	d1234	12.488	3.755	6.0938	7.74237	1.64858	1	0.29777	2.30545	0.490897
0000024_14.tif	predator	CF2805	d1234	15.401	7.033	6.0938	5.86352	-0.230271	0	0.29777	1.74598	-0.0685678
0000024_14.tif	predator	CF2805	d1234	15.602	7.714	6.0938	5.51736	-0.57644	0	0.29777	1.6429	-0.171647
0000024_14.tif	predator	CF2805	d1234	16.547	9.724	6.0938	5.30076	-0.793036	0	0.29777	1.57841	-0.236142
0000024_14.tif	predator	CF2805	d1234	16.089	10.113	6.0938	4.74668	-1.34711	0	0.29777	1.41342	-0.40113
0000024_14.tif	predator	CF2805	d1234	17.859	10.543	6.0938	6.39098	0.297183	1	0.29777	1.90304	0.0884921
0000024_14.tif	predator	CF2805	d1234	16.123	11.502	6.0938	4.59245	-1.50135	0	0.29777	1.36749	-0.447057
0000024_14.tif	predator	CF2805	d1234	16.144	11.731	6.0938	4.6223	-1.4715	0	0.29777	1.37638	-0.438169
0000024_14.tif	predator	CF2805	d1234	17.269	12.543	6.0938	5.84343	-0.250366	0	0.29777	1.74	-0.0745516
0000024_14.tif	predator	CF2805	d1234	17.984	13.21	6.0938	6.69188	0.598079	1	0.29777	1.99264	0.17809
0000024_14.tif	predator	CF2805	d1234	18.095	13.356	6.0938	6.83848	0.744685	1	0.29777	2.03629	0.221745
0000024_14.tif	predator	CF2805	d1234	16.214	12.96	6.0938	4.92412	-1.16967	0	0.29777	1.46626	-0.348294
0000024_14.tif	predator	CF2805	d1234	16.227	13.439	6.0938	5.10455	-0.989247	0	0.29777	1.51998	-0.294568
0000024_14.tif	predator	CF2805	d1234	14.991	13.929	6.0938	4.26341	-1.83038	0	0.29777	1.26952	-0.545033
0000024_14.tif	predator	CF2805	d1234	15.498	14.026	6.0938	4.73654	-1.35725	0	0.29777	1.4104	-0.404149
0000024_14.tif	predator	CF2805	d1234	14.804	14.922	6.0938	4.78025	-1.31355	0	0.29777	1.42341	-0.391135
0000024_14.tif	predator	CF2805	d1234	14.894	15.408	6.0938	5.20295	-0.890848	0	0.29777	1.54928	-0.265268
0000024_14.tif	predator	CF2805	d1234	16.026	14.498	6.0938	5.4377	-0.656092	0	0.29777	1.61919	-0.195365
0000024_14.tif	predator	CF2805	d1234	16.019	14.63	6.0938	5.50736	-0.586437	0	0.29777	1.63993	-0.174623
0000024_14.tif	predator	CF2805	d1234	16.276	15.602	6.0938	6.313	0.2192	1	0.29777	1.87982	0.0652712
0000024_14.tif	predator	CF2805	d1234	16.665	15.762	6.0938	6.7123	0.618501	1	0.29777	1.99872	0.184171
0000024_14.tif	predator	CF2805	d1234	17.679	15.276	6.0938	7.24763	1.15383	1	0.29777	2.15813	0.343577
0000024_14.tif	predator	CF2805	d1234	18.047	14.943	6.0938	7.39887	1.30507	1	0.29777	2.20316	0.388612
0000024_14.tif	predator	CF2805	d1234	17.38	14.609	6.0938	6.65327	0.559477	1	0.29777	1.98115	0.166595
0000024_14.tif	predator	CF2805	d1234	15.484	17.137	6.0938	6.93576	0.841967	1	0.29777	2.06526	0.250713
0000024_14.tif	predator	CF2805	d1234	15.116	17.45	6.0938	6.99974	0.905945	1	0.29777	2.08431	0.269763
0000024_14.tif	predator	CF2805	d1234	15.012	17.54	6.0938	7.02508	0.931285	1	0.29777	2.09186	0.277309
0000024_14.tif	predator	CF2805	d1234	18.352	14.297	6.0938	7.39594	1.30214	1	0.29777	2.20229	0.387739
0000024_14.tif	predator	CF2805	d1234	19.644	12.599	6.0938	8.19565	2.10185	1	0.29777	2.44042	0.625869
0000024_14.tif	predator	CF2805	d1234	18.87	9.453	6.0938	7.60271	1.50891	1	0.29777	2.26386	0.449308
0000026_46.tif	predator	N2	wt	6.344	4.26	5.96874	9.74917	3.78043	1	0.29777	2.90301	1.1257
0000026_46.tif	predator	N2	wt	6.141	4.345	5.96874	9.82903	3.86029	1	0.29777	2.92679	1.14948
0000026_46.tif	predator	N2	wt	5.773	5.641	5.96874	9.23919	3.27044	1	0.29777	2.75115	0.97384
0000026_46.tif	predator	N2	wt	6.564	6.425	5.96874	8.13394	2.1652	1	0.29777	2.42204	0.644732
0000026_46.tif	predator	N2	wt	5.3	6.252	5.96874	9.26645	3.2977	1	0.29777	2.75927	0.981957
0000026_46.tif	predator	N2	wt	6.036	7.724	5.96874	7.88596	1.91722	1	0.29777	2.3482	0.570891
0000026_46.tif	predator	N2	wt	3.849	8.009	5.96874	9.77924	3.8105	1	0.29777	2.91196	1.13465
0000026_46.tif	predator	N2	wt	5.106	9.321	5.96874	8.18979	2.22105	1	0.29777	2.43867	0.661361
0000026_46.tif	predator	N2	wt	5.286	9.328	5.96874	8.01373	2.04498	1	0.29777	2.38625	0.608935
0000026_46.tif	predator	N2	wt	5.266	9.425	5.96874	8.00929	2.04055	1	0.29777	2.38493	0.607614
0000026_46.tif	predator	N2	wt	5.967	9.078	5.96874	7.42902	1.46028	1	0.29777	2.21214	0.434828
0000026_46.tif	predator	N2	wt	6.8	10.922	5.96874	6.25625	0.287507	1	0.29777	1.86292	0.0856109
0000026_46.tif	predator	N2	wt	4.064	10.957	5.96874	8.98634	3.0176	1	0.29777	2.67586	0.898549
0000026_46.tif	predator	N2	wt	4.189	10.818	5.96874	8.86861	2.89987	1	0.29777	2.64081	0.863494
0000026_46.tif	predator	N2	wt	4.384	11.033	5.96874	8.66358	2.69484	1	0.29777	2.57976	0.802443
0000026_46.tif	predator	N2	wt	4.002	12.158	5.96874	9.07657	3.10783	1	0.29777	2.70273	0.925419
0000026_46.tif	predator	N2	wt	5.773	12.151	5.96874	7.31366	1.34492	1	0.29777	2.17779	0.400476
0000026_46.tif	predator	N2	wt	6.293	12.505	5.96874	6.84813	0.879391	1	0.29777	2.03917	0.261856
0000026_46.tif	predator	N2	wt	6.502	12.373	5.96874	6.62046	0.651714	1	0.29777	1.97137	0.194061
0000026_46.tif	predator	N2	wt	6.655	12.45	5.96874	6.48205	0.513311	1	0.29777	1.93016	0.152849
0000026_46.tif	predator	N2	wt	5.96	14.738	5.96874	7.85328	1.88454	1	0.29777	2.33847	0.561158
0000026_46.tif	predator	N2	wt	4.53	16.141	5.96874	9.77064	3.8019	1	0.29777	2.9094	1.13209
0000026_46.tif	predator	N2	wt	4.599	16.286	5.96874	9.78303	3.81428	1	0.29777	2.91309	1.13578
0000026_46.tif	predator	N2	wt	10.356	17.595	5.96874	6.80365	0.834904	1	0.29777	2.02592	0.248609
0000026_46.tif	predator	N2	wt	8.807	16.411	5.96874	6.60377	0.635023	1	0.29777	1.9664	0.189091
0000026_46.tif	predator	N2	wt	11.238	16.835	5.96874	5.77975	-0.188993	0	0.29777	1.72104	-0.0562764
0000026_46.tif	predator	N2	wt	10.793	16.557	5.96874	5.67744	-0.291298	0	0.29777	1.69057	-0.0867398
0000026_46.tif	predator	N2	wt	8.356	13.977	5.96874	5.37506	-0.59368	0	0.29777	1.60053	-0.17678
0000026_46.tif	predator	N2	wt	8.488	13.804	5.96874	5.17596	-0.792786	0	0.29777	1.54124	-0.236068
0000026_46.tif	predator	N2	wt	8.398	6.686	5.96874	6.57751	0.608773	1	0.29777	1.95859	0.181274
0000026_46.tif	predator	N2	wt	9.002	5.825	5.96874	6.83966	0.870919	1	0.29777	2.03665	0.259334
0000026_46.tif	predator	N2	wt	9.231	4.273	5.96874	8.03261	2.06386	1	0.29777	2.39187	0.614557
0000026_46.tif	predator	N2	wt	9.398	4.3	5.96874	7.93074	1.962	1	0.29777	2.36154	0.584225
0000026_46.tif	predator	N2	wt	9.898	2.891	5.96874	9.01876	3.05001	1	0.29777	2.68551	0.908202
0000026_46.tif	predator	N2	wt	10.398	3.259	5.96874	8.50635	2.53761	1	0.29777	2.53294	0.755623
0000026_46.tif	predator	N2	wt	10.891	3.286	5.96874	8.34015	2.37141	1	0.29777	2.48345	0.706135
0000026_46.tif	predator	N2	wt	11.432	4.182	5.96874	7.34073	1.37199	1	0.29777	2.18585	0.408537
0000026_46.tif	predator	N2	wt	10.523	2.703	5.96874	9.00068	3.03194	1	0.29777	2.68013	0.90282
0000026_46.tif	predator	N2	wt	10.648	2.766	5.96874	8.9058	2.93706	1	0.29777	2.65188	0.874569
0000026_46.tif	predator	N2	wt	11.12	2.564	5.96874	8.98791	3.01917	1	0.29777	2.67633	0.899017
0000026_46.tif	predator	N2	wt	11.148	2.46	5.96874	9.08365	3.11491	1	0.29777	2.70484	0.927526
0000026_46.tif	predator	N2	wt	10.842	2.328	5.96874	9.28053	3.31179	1	0.29777	2.76346	0.986151
0000026_46.tif	predator	N2	wt	12.207	1.391	5.96874	9.98796	4.01922	1	0.29777	2.97412	1.1968
0000026_46.tif	predator	N2	wt	12.318	1.509	5.96874	9.86161	3.89287	1	0.29777	2.93649	1.15918
0000026_46.tif	predator	N2	wt	12.519	4.245	5.96874	7.11824	1.1495	1	0.29777	2.1196	0.342286
0000026_46.tif	predator	N2	wt	13.2	9.877	5.96874	1.47548	-4.49326	0	0.29777	0.439355	-1.33796
0000026_46.tif	predator	N2	wt	12.901	10.189	5.96874	1.16357	-4.80517	0	0.29777	0.346478	-1.43083
0000026_46.tif	predator	N2	wt	14.415	17.495	5.96874	6.30237	0.333633	1	0.29777	1.87666	0.0993459
0000026_46.tif	predator	N2	wt	12.033	17.995	5.96874	6.7271	0.758359	1	0.29777	2.00313	0.225816
0000026_46.tif	predator	N2	wt	11.762	20.179	5.96874	8.92724	2.9585	1	0.29777	2.65826	0.880952
0000026_46.tif	predator	N2	wt	12.033	19.845	5.96874	8.56067	2.59193	1	0.29777	2.54911	0.771799
0000026_46.tif	predator	N2	wt	14.505	21.339	5.96874	10.1015	4.13276	1	0.29777	3.00793	1.23061
0000026_46.tif	predator	N2	wt	14.63	21.318	5.96874	10.0996	4.13088	1	0.29777	3.00737	1.23005
0000026_46.tif	predator	N2	wt	16.234	18.276	5.96874	7.63161	1.66287	1	0.29777	2.27246	0.495153
0000026_46.tif	predator	N2	wt	16.47	18.589	5.96874	8.01506	2.04632	1	0.29777	2.38664	0.609333
0000026_46.tif	predator	N2	wt	18.915	18.679	5.96874	9.39651	3.42777	1	0.29777	2.798	1.02069
0000026_46.tif	predator	N2	wt	18.345	17.672	5.96874	8.25623	2.28749	1	0.29777	2.45846	0.681146
0000026_46.tif	predator	N2	wt	18.547	17.762	5.96874	8.45552	2.48677	1	0.29777	2.5178	0.740487
0000026_46.tif	predator	N2	wt	18.686	17.727	5.96874	8.52041	2.55167	1	0.29777	2.53712	0.759811
0000026_46.tif	predator	N2	wt	18.741	17.609	5.96874	8.46929	2.50055	1	0.29777	2.5219	0.744587
0000026_46.tif	predator	N2	wt	19.13	17.658	5.96874	8.77099	2.80225	1	0.29777	2.61174	0.834427
0000026_46.tif	predator	N2	wt	17.595	13.47	5.96874	5.02491	-0.943835	0	0.29777	1.49627	-0.281046
0000026_46.tif	predator	N2	wt	17.734	13.325	5.96874	5.09306	-0.875685	0	0.29777	1.51656	-0.260753
0000026_46.tif	predator	N2	wt	19.318	11.686	5.96874	6.28531	0.31657	1	0.29777	1.87158	0.0942649
0000026_46.tif	predator	N2	wt	19.866	11.283	5.96874	6.82427	0.855531	1	0.29777	2.03206	0.254751
0000026_46.tif	predator	N2	wt	18.165	6.189	5.96874	7.26768	1.29894	1	0.29777	2.1641	0.386784
0000026_46.tif	predator	N2	wt	18.012	5.325	5.96874	7.80572	1.83698	1	0.29777	2.32431	0.546997
0000026_46.tif	predator	N2	wt	19.505	5.339	5.96874	8.82215	2.85341	1	0.29777	2.62697	0.84966
0000026_46.tif	predator	N2	wt	19.054	5.04	5.96874	8.71117	2.74243	1	0.29777	2.59393	0.816614
0000026_46.tif	predator	N2	wt	19.783	4.505	5.96874	9.60276	3.63402	1	0.29777	2.85941	1.0821
0000026_46.tif	predator	N2	wt	20.047	4.554	5.96874	9.75572	3.78698	1	0.29777	2.90496	1.12765
0000026_46.tif	predator	N2	wt	16.908	2.179	5.96874	9.94702	3.97828	1	0.29777	2.96192	1.18461
0000026_46.tif	predator	N2	wt	20.984	5.099	5.96874	10.1032	4.13449	1	0.29777	3.00844	1.23113
0000026_46.tif	predator	N2	wt	21.068	5.092	5.96874	10.1737	4.20496	1	0.29777	3.02942	1.25211
0000026_46.tif	predator	N2	wt	21.13	5.439	5.96874	10.0142	4.04549	1	0.29777	2.98194	1.20462
0000026_46.tif	predator	N2	wt	21.109	5.536	5.96874	9.94029	3.97155	1	0.29777	2.95992	1.18261
0000026_46.tif	predator	N2	wt	21.72	6.96	5.96874	9.72251	3.75377	1	0.29777	2.89507	1.11776
0000026_46.tif	predator	N2	wt	21.887	7.03	5.96874	9.84097	3.87222	1	0.29777	2.93034	1.15303
0000026_46.tif	predator	N2	wt	20.075	7.245	5.96874	8.14032	2.17158	1	0.29777	2.42394	0.646632
0000026_46.tif	predator	N2	wt	21.123	8.161	5.96874	8.68528	2.71654	1	0.29777	2.58622	0.808903
0000026_46.tif	predator	N2	wt	21.165	8.467	5.96874	8.61744	2.6487	1	0.29777	2.56601	0.788703
0000026_46.tif	predator	N2	wt	21.186	8.62	5.96874	8.58749	2.61874	1	0.29777	2.5571	0.779783
0000026_46.tif	predator	N2	wt	21.227	8.821	5.96874	8.56503	2.59629	1	0.29777	2.55041	0.773097
0000026_46.tif	predator	N2	wt	22.47	9.55	5.96874	9.59717	3.62843	1	0.29777	2.85775	1.08044
0000026_46.tif	predator	N2	wt	22.45	9.703	5.96874	9.55004	3.5813	1	0.29777	2.84372	1.0664
0000026_46.tif	predator	N2	wt	20.866	9.932	5.96874	7.95039	1.98165	1	0.29777	2.36739	0.590076
0000026_46.tif	predator	N2	wt	20.248	10.481	5.96874	7.25749	1.28875	1	0.29777	2.16106	0.383751
0000026_46.tif	predator	N2	wt	20.88	11.085	5.96874	7.84228	1.87354	1	0.29777	2.3352	0.557883
0000026_46.tif	predator	N2	wt	21.568	11.818	5.96874	8.53917	2.57042	1	0.29777	2.54271	0.765395
0000026_46.tif	predator	N2	wt	21.852	13.505	5.96874	9.07116	3.10242	1	0.29777	2.70112	0.923808
0000026_46.tif	predator	N2	wt	21.373	13.825	5.96874	8.69258	2.72384	1	0.29777	2.58839	0.811077
0000026_46.tif	predator	N2	wt	21.575	14.158	5.96874	8.98503	3.01628	1	0.29777	2.67547	0.898159
0000026_46.tif	predator	N2	wt	22.082	14.214	5.96874	9.48465	3.5159	1	0.29777	2.82424	1.04693
0000026_46.tif	predator	N2	wt	21.033	15.359	5.96874	8.94295	2.97421	1	0.29777	2.66294	0.885629
0000026_46.tif	predator	N2	wt	20.984	16.307	5.96874	9.36519	3.39645	1	0.29777	2.78867	1.01136
0000026_46.tif	predator	N2	wt	20.95	17.245	5.96874	9.86703	3.89829	1	0.29777	2.93811	1.16079
0000026_46.tif	predator	N2	wt	21.318	17.064	5.96874	10.0603	4.0916	1	0.29777	2.99567	1.21836
0000026_46.tif	predator	N2	wt	21.707	16.905	5.96874	10.296	4.32723	1	0.29777	3.06583	1.28852
0000026_46.tif	predator	N2	wt	21.714	16.828	5.96874	10.2605	4.29176	1	0.29777	3.05527	1.27796
0000026_46.tif	predator	N2	wt	21.512	16.759	5.96874	10.053	4.08427	1	0.29777	2.99349	1.21617
0000028_16.tif	control	LX734	d123	6.01	11.594	5.3541	7.86195	2.50786	1	0.29777	2.34105	0.746764
0000028_16.tif	control	LX734	d123	6.116	11.63	5.3541	7.75382	2.39972	1	0.29777	2.30885	0.714565
0000028_16.tif	control	LX734	d123	9.297	11.408	5.3541	4.61306	-0.741035	0	0.29777	1.37363	-0.220658
0000028_16.tif	control	LX734	d123	8.797	11.047	5.3541	5.17062	-0.183475	0	0.29777	1.53966	-0.0546332
0000028_16.tif	control	LX734	d123	9.984	9.516	5.3541	4.66731	-0.686787	0	0.29777	1.38978	-0.204505
0000028_16.tif	control	LX734	d123	10.575	8.321	5.3541	5.02218	-0.33192	0	0.29777	1.49545	-0.0988359
0000028_16.tif	control	LX734	d123	10.651	8.238	5.3541	5.03666	-0.317433	0	0.29777	1.49977	-0.0945221
0000028_16.tif	control	LX734	d123	10.658	8.509	5.3541	4.82596	-0.528139	0	0.29777	1.43703	-0.157264
0000028_16.tif	control	LX734	d123	12.332	16.891	5.3541	5.00312	-0.350974	0	0.29777	1.48978	-0.104509
0000028_16.tif	control	LX734	d123	13.269	16.766	5.3541	4.67772	-0.676372	0	0.29777	1.39289	-0.201403
0000028_16.tif	control	LX734	d123	13.366	16.731	5.3541	4.63178	-0.722317	0	0.29777	1.3792	-0.215084
0000028_16.tif	control	LX734	d123	12.519	16.425	5.3541	4.50247	-0.851628	0	0.29777	1.3407	-0.253589
0000028_16.tif	control	LX734	d123	12.29	16.189	5.3541	4.35456	-0.999537	0	0.29777	1.29666	-0.297632
0000028_16.tif	control	LX734	d123	12.602	14.148	5.3541	2.37908	-2.97501	0	0.29777	0.708419	-0.88587
0000028_16.tif	control	LX734	d123	12.186	13.925	5.3541	2.45402	-2.90007	0	0.29777	0.730734	-0.863555
0000028_16.tif	control	LX734	d123	12.109	13.835	5.3541	2.44318	-2.91092	0	0.29777	0.727505	-0.866784
0000028_16.tif	control	LX734	d123	12.957	13.391	5.3541	1.55157	-3.80253	0	0.29777	0.462011	-1.13228
0000028_16.tif	control	LX734	d123	13.29	13.05	5.3541	1.08338	-4.27071	0	0.29777	0.322599	-1.27169
0000028_16.tif	control	LX734	d123	13.304	12.689	5.3541	0.787779	-4.56632	0	0.29777	0.234577	-1.35971
0000028_16.tif	control	LX734	d123	12.915	11.974	5.3541	0.951064	-4.40303	0	0.29777	0.283198	-1.31109
0000028_16.tif	control	LX734	d123	11.568	10.54	5.3541	2.78173	-2.57237	0	0.29777	0.828316	-0.765974
0000028_16.tif	control	LX734	d123	11.665	10.526	5.3541	2.71082	-2.64328	0	0.29777	0.8072	-0.78709
0000028_16.tif	control	LX734	d123	11.644	10.359	5.3541	2.82893	-2.52516	0	0.29777	0.842371	-0.751918
0000028_16.tif	control	LX734	d123	13.359	10.686	5.3541	1.52176	-3.83234	0	0.29777	0.453134	-1.14116
0000028_16.tif	control	LX734	d123	12.825	10.214	5.3541	2.17043	-3.18367	0	0.29777	0.646289	-0.948001
0000028_16.tif	control	LX734	d123	12.297	9.321	5.3541	3.20728	-2.14681	0	0.29777	0.955033	-0.639257
0000028_16.tif	control	LX734	d123	12.158	9.189	5.3541	3.39065	-1.96345	0	0.29777	1.00963	-0.584655
0000028_16.tif	control	LX734	d123	12.359	8.946	5.3541	3.51299	-1.84111	0	0.29777	1.04606	-0.548228
0000028_16.tif	control	LX734	d123	12.332	8.523	5.3541	3.91036	-1.44374	0	0.29777	1.16439	-0.429903
0000028_16.tif	control	LX734	d123	11.693	8.752	5.3541	4.00588	-1.34822	0	0.29777	1.19283	-0.401459
0000028_16.tif	control	LX734	d123	11.54	7.477	5.3541	5.19216	-0.161939	0	0.29777	1.54607	-0.0482206
0000028_16.tif	control	LX734	d123	11.679	7.498	5.3541	5.11271	-0.241392	0	0.29777	1.52241	-0.0718792
0000028_16.tif	control	LX734	d123	12.095	7.637	5.3541	4.8204	-0.5337	0	0.29777	1.43537	-0.15892
0000028_16.tif	control	LX734	d123	12.179	7.637	5.3541	4.79038	-0.563714	0	0.29777	1.42643	-0.167857
0000028_16.tif	control	LX734	d123	10.484	5.599	5.3541	7.34477	1.99067	1	0.29777	2.18705	0.592761
0000028_16.tif	control	LX734	d123	13.37	5.401	5.3541	6.7414	1.3873	1	0.29777	2.00739	0.413096
0000028_16.tif	control	LX734	d123	15.583	8.677	5.3541	3.85722	-1.49688	0	0.29777	1.14856	-0.445725
0000028_16.tif	control	LX734	d123	14.156	8.734	5.3541	3.40442	-1.94968	0	0.29777	1.01373	-0.580555
0000028_16.tif	control	LX734	d123	14.151	8.823	5.3541	3.31533	-2.03877	0	0.29777	0.987206	-0.607084
0000028_16.tif	control	LX734	d123	13.562	9.667	5.3541	2.47528	-2.87881	0	0.29777	0.737065	-0.857224
0000028_16.tif	control	LX734	d123	14.432	9.276	5.3541	2.90704	-2.44706	0	0.29777	0.865629	-0.72866
0000028_16.tif	control	LX734	d123	14.62	9.922	5.3541	2.33237	-3.02172	0	0.29777	0.694511	-0.899779
0000028_16.tif	control	LX734	d123	15.271	9.719	5.3541	2.79226	-2.56184	0	0.29777	0.831452	-0.762838
0000028_16.tif	control	LX734	d123	16.26	9.958	5.3541	3.23801	-2.11608	0	0.29777	0.964183	-0.630106
0000028_16.tif	control	LX734	d123	13.661	10.526	5.3541	1.61061	-3.74349	0	0.29777	0.47959	-1.1147
0000028_16.tif	control	LX734	d123	13.677	10.599	5.3541	1.53623	-3.81787	0	0.29777	0.457443	-1.13685
0000028_16.tif	control	LX734	d123	13.891	10.349	5.3541	1.77639	-3.57771	0	0.29777	0.528954	-1.06534
0000028_16.tif	control	LX734	d123	14.156	10.49	5.3541	1.66266	-3.69144	0	0.29777	0.495089	-1.0992
0000028_16.tif	control	LX734	d123	13.547	11.5	5.3541	0.696329	-4.65777	0	0.29777	0.207346	-1.38694
0000028_16.tif	control	LX734	d123	13.656	11.427	5.3541	0.72554	-4.62856	0	0.29777	0.216044	-1.37825
0000028_16.tif	control	LX734	d123	13.786	11.385	5.3541	0.743118	-4.61098	0	0.29777	0.221278	-1.37301
0000028_16.tif	control	LX734	d123	13.703	11.552	5.3541	0.592562	-4.76153	0	0.29777	0.176447	-1.41784
0000028_16.tif	control	LX734	d123	14.557	11.719	5.3541	0.811816	-4.54228	0	0.29777	0.241734	-1.35255
0000028_16.tif	control	LX734	d123	14.724	12.198	5.3541	0.873057	-4.48104	0	0.29777	0.25997	-1.33432
0000028_16.tif	control	LX734	d123	15.094	12.016	5.3541	1.24478	-4.10932	0	0.29777	0.370659	-1.22363
0000028_16.tif	control	LX734	d123	15.771	11.333	5.3541	2.07416	-3.27993	0	0.29777	0.617624	-0.976666
0000028_16.tif	control	LX734	d123	15.854	11.276	5.3541	2.17274	-3.18136	0	0.29777	0.646977	-0.947312
0000028_16.tif	control	LX734	d123	15.984	11.208	5.3541	2.31901	-3.03509	0	0.29777	0.69053	-0.903759
0000028_16.tif	control	LX734	d123	16.828	12.021	5.3541	2.97582	-2.37828	0	0.29777	0.886109	-0.70818
0000028_16.tif	control	LX734	d123	16.74	12.12	5.3541	2.886	-2.46809	0	0.29777	0.859366	-0.734924
0000028_16.tif	control	LX734	d123	16.245	12.453	5.3541	2.41339	-2.9407	0	0.29777	0.718636	-0.875653
0000028_16.tif	control	LX734	d123	15.839	12.401	5.3541	2.0041	-3.35	0	0.29777	0.59676	-0.99753
0000028_16.tif	control	LX734	d123	14.146	12.688	5.3541	0.634218	-4.71988	0	0.29777	0.188851	-1.40544
0000028_16.tif	control	LX734	d123	14.562	12.948	5.3541	1.08563	-4.26847	0	0.29777	0.323268	-1.27102
0000028_16.tif	control	LX734	d123	13.646	13.688	5.3541	1.57678	-3.77732	0	0.29777	0.469518	-1.12477
0000028_16.tif	control	LX734	d123	14.146	13.615	5.3541	1.51834	-3.83575	0	0.29777	0.452117	-1.14217
0000028_16.tif	control	LX734	d123	14.641	13.422	5.3541	1.5171	-3.837	0	0.29777	0.451745	-1.14254
0000028_16.tif	control	LX734	d123	15.281	13.036	5.3541	1.693	-3.6611	0	0.29777	0.504125	-1.09016
0000028_16.tif	control	LX734	d123	15.646	13.729	5.3541	2.40501	-2.94909	0	0.29777	0.71614	-0.878149
0000028_16.tif	control	LX734	d123	15.865	13.526	5.3541	2.4509	-2.90319	0	0.29777	0.729805	-0.864484
0000028_16.tif	control	LX734	d123	16.531	13.286	5.3541	2.91792	-2.43618	0	0.29777	0.868869	-0.725421
0000028_16.tif	control	LX734	d123	16.547	13.052	5.3541	2.84808	-2.50601	0	0.29777	0.848074	-0.746216
0000028_16.tif	control	LX734	d123	16.599	13.849	5.3541	3.24148	-2.11262	0	0.29777	0.965216	-0.629073
0000028_16.tif	control	LX734	d123	13.453	14.182	5.3541	2.09572	-3.25837	0	0.29777	0.624043	-0.970246
0000028_16.tif	control	LX734	d123	13.719	14.245	5.3541	2.12429	-3.2298	0	0.29777	0.632551	-0.961738
0000028_16.tif	control	LX734	d123	13.651	14.302	5.3541	2.18644	-3.16765	0	0.29777	0.651057	-0.943232
0000028_16.tif	control	LX734	d123	14.49	14.49	5.3541	2.44902	-2.90507	0	0.29777	0.729246	-0.865043
0000028_16.tif	control	LX734	d123	15.49	14.12	5.3541	2.58002	-2.77407	0	0.29777	0.768254	-0.826036
0000028_16.tif	control	LX734	d123	16.297	14.422	5.3541	3.35328	-2.00082	0	0.29777	0.998505	-0.595784
0000028_16.tif	control	LX734	d123	16.297	14.49	5.3541	3.40022	-1.95388	0	0.29777	1.01248	-0.581807
0000028_16.tif	control	LX734	d123	16.271	14.323	5.3541	3.26697	-2.08713	0	0.29777	0.972806	-0.621484
0000028_16.tif	control	LX734	d123	16.552	14.609	5.3541	3.66735	-1.68675	0	0.29777	1.09203	-0.502262
0000028_16.tif	control	LX734	d123	14.859	15.281	5.3541	3.31215	-2.04194	0	0.29777	0.98626	-0.608029
0000028_16.tif	control	LX734	d123	15.578	15.693	5.3541	3.96268	-1.39142	0	0.29777	1.17997	-0.414323
0000028_16.tif	control	LX734	d123	15.135	16.245	5.3541	4.31455	-1.03954	0	0.29777	1.28474	-0.309545
0000028_16.tif	control	LX734	d123	13.604	16.589	5.3541	4.47099	-0.883102	0	0.29777	1.33133	-0.262961
0000028_16.tif	control	LX734	d123	16.229	15.891	5.3541	4.45235	-0.901751	0	0.29777	1.32577	-0.268514
0000028_16.tif	control	LX734	d123	15.219	18.354	5.3541	6.37681	1.02271	1	0.29777	1.89882	0.304532
0000028_16.tif	control	LX734	d123	14.161	20.151	5.3541	8.03187	2.67777	1	0.29777	2.39165	0.79736
0000028_16.tif	control	LX734	d123	14.161	20.25	5.3541	8.1308	2.7767	1	0.29777	2.42111	0.826818
0000028_16.tif	control	LX734	d123	14.552	20.172	5.3541	8.07722	2.72312	1	0.29777	2.40515	0.810863
0000028_16.tif	control	LX734	d123	14.641	20.031	5.3541	7.94507	2.59098	1	0.29777	2.3658	0.771515
0000028_16.tif	control	LX734	d123	13.594	20.823	5.3541	8.70189	3.34779	1	0.29777	2.59116	0.996871
0000028_16.tif	control	LX734	d123	20.021	13.969	5.3541	6.43679	1.08269	1	0.29777	1.91668	0.322393
0000028_16.tif	control	LX734	d123	20.365	13.849	5.3541	6.73538	1.38128	1	0.29777	2.00559	0.411304
0000028_16.tif	control	LX734	d123	21.125	13.641	5.3541	7.42736	2.07326	1	0.29777	2.21165	0.617356
0000028_16.tif	control	LX734	d123	20.922	13.526	5.3541	7.20551	1.85142	1	0.29777	2.14559	0.551296
0000028_16.tif	control	LX734	d123	23.031	12.495	5.3541	9.18446	3.83036	1	0.29777	2.73486	1.14057
0000028_16.tif	control	LX734	d123	16.932	13.885	5.3541	3.54566	-1.80844	0	0.29777	1.05579	-0.538499
0000028_16.tif	control	LX734	d123	17.052	13.849	5.3541	3.6331	-1.721	0	0.29777	1.08183	-0.512463
0000028_16.tif	control	LX734	d123	17.156	13.635	5.3541	3.63088	-1.72321	0	0.29777	1.08117	-0.513122
0000028_16.tif	control	LX734	d123	16.953	13.604	5.3541	3.43384	-1.92026	0	0.29777	1.02249	-0.571796
0000028_16.tif	control	LX734	d123	16.943	13.484	5.3541	3.37473	-1.97937	0	0.29777	1.00489	-0.589396
0000028_16.tif	control	LX734	d123	16.969	13.286	5.3541	3.32433	-2.02977	0	0.29777	0.989885	-0.604405
0000028_16.tif	control	LX734	d123	17.573	14.5	5.3541	4.41266	-0.941435	0	0.29777	1.31396	-0.280331
0000028_16.tif	control	LX734	d123	17.474	13.516	5.3541	3.87805	-1.47605	0	0.29777	1.15477	-0.439522
0000028_16.tif	control	LX734	d123	17.557	13.615	5.3541	3.99153	-1.36257	0	0.29777	1.18856	-0.405732
0000028_16.tif	control	LX734	d123	17.641	13.552	5.3541	4.04694	-1.30716	0	0.29777	1.20506	-0.389233
0000028_16.tif	control	LX734	d123	17.667	13.698	5.3541	4.12472	-1.22938	0	0.29777	1.22822	-0.366072
0000028_16.tif	control	LX734	d123	18.521	13.193	5.3541	4.78764	-0.566455	0	0.29777	1.42562	-0.168673
0000028_16.tif	control	LX734	d123	18.062	12.729	5.3541	4.25113	-1.10297	0	0.29777	1.26586	-0.328431
0000028_16.tif	control	LX734	d123	18.203	12.714	5.3541	4.3887	-0.965393	0	0.29777	1.30682	-0.287465
0000028_16.tif	control	LX734	d123	18.286	12.677	5.3541	4.46624	-0.887854	0	0.29777	1.32991	-0.264376
0000028_16.tif	control	LX734	d123	18.13	11.99	5.3541	4.27813	-1.07597	0	0.29777	1.2739	-0.32039
0000028_16.tif	control	LX734	d123	18.302	11.771	5.3541	4.46206	-0.892032	0	0.29777	1.32867	-0.26562
0000028_16.tif	control	LX734	d123	18.589	11.802	5.3541	4.746	-0.608093	0	0.29777	1.41322	-0.181072
0000028_16.tif	control	LX734	d123	18.229	11.51	5.3541	4.41801	-0.936082	0	0.29777	1.31555	-0.278737
0000028_16.tif	control	LX734	d123	17.219	11.458	5.3541	3.43047	-1.92363	0	0.29777	1.02149	-0.572799
0000028_16.tif	control	LX734	d123	17.193	11.344	5.3541	3.42912	-1.92497	0	0.29777	1.02109	-0.5732
0000028_16.tif	control	LX734	d123	17.589	10.964	5.3541	3.91128	-1.44281	0	0.29777	1.16466	-0.429626
0000028_16.tif	control	LX734	d123	17.672	10.964	5.3541	3.99062	-1.36348	0	0.29777	1.18829	-0.406003
0000028_16.tif	control	LX734	d123	18	9.245	5.3541	5.04814	-0.305957	0	0.29777	1.50318	-0.0911048
0000028_16.tif	control	LX734	d123	17.932	9.031	5.3541	5.11888	-0.235218	0	0.29777	1.52425	-0.0700408
0000028_16.tif	control	LX734	d123	17.818	9.026	5.3541	5.03161	-0.322487	0	0.29777	1.49826	-0.0960269
0000028_16.tif	control	LX734	d123	16.885	8.141	5.3541	5.00592	-0.348179	0	0.29777	1.49061	-0.103677
0000028_16.tif	control	LX734	d123	18.828	7.974	5.3541	6.47854	1.12444	1	0.29777	1.92911	0.334825
0000028_16.tif	control	LX734	d123	19.26	7.958	5.3541	6.82559	1.4715	1	0.29777	2.03246	0.438168
0000028_16.tif	control	LX734	d123	21.901	8.958	5.3541	8.64778	3.29368	1	0.29777	2.57505	0.98076
0000028_22.tif	control	LX734	d123	12.318	17.557	5.46362	5.02746	-0.436159	0	0.29777	1.49703	-0.129875
0000028_22.tif	control	LX734	d123	12.672	17.583	5.46362	4.99495	-0.468666	0	0.29777	1.48735	-0.139555
0000028_22.tif	control	LX734	d123	13.495	17.901	5.46362	5.27397	-0.189645	0	0.29777	1.57043	-0.0564706
0000028_22.tif	control	LX734	d123	13.453	17.797	5.46362	5.16876	-0.294853	0	0.29777	1.5391	-0.0877983
0000028_22.tif	control	LX734	d123	12.714	16.271	5.46362	3.69076	-1.77286	0	0.29777	1.099	-0.527904
0000028_22.tif	control	LX734	d123	12.068	16.375	5.46362	3.9481	-1.51551	0	0.29777	1.17563	-0.451274
0000028_22.tif	control	LX734	d123	12.089	16.286	5.46362	3.85704	-1.60657	0	0.29777	1.14851	-0.478389
0000028_22.tif	control	LX734	d123	12.115	16.167	5.46362	3.73598	-1.72763	0	0.29777	1.11246	-0.514437
0000028_22.tif	control	LX734	d123	11.901	16.026	5.46362	3.67977	-1.78385	0	0.29777	1.09573	-0.531176
0000028_22.tif	control	LX734	d123	11.844	15.927	5.46362	3.61149	-1.85212	0	0.29777	1.07539	-0.551507
0000028_22.tif	control	LX734	d123	11.464	15.51	5.46362	3.42516	-2.03846	0	0.29777	1.01991	-0.606991
0000028_22.tif	control	LX734	d123	11.984	15.714	5.46362	3.36015	-2.10347	0	0.29777	1.00055	-0.626349
0000028_22.tif	control	LX734	d123	12.167	15.698	5.46362	3.2768	-2.18682	0	0.29777	0.975733	-0.651168
0000028_22.tif	control	LX734	d123	11.385	15.302	5.46362	3.29789	-2.16573	0	0.29777	0.982012	-0.644889
0000028_22.tif	control	LX734	d123	12.089	14.885	5.46362	2.56816	-2.89545	0	0.29777	0.764722	-0.862179
0000028_22.tif	control	LX734	d123	13.188	15.198	5.46362	2.57129	-2.89233	0	0.29777	0.765653	-0.861248
0000028_22.tif	control	LX734	d123	13.068	15.062	5.46362	2.44482	-3.0188	0	0.29777	0.727993	-0.898908
0000028_22.tif	control	LX734	d123	12.995	14.917	5.46362	2.3097	-3.15392	0	0.29777	0.687758	-0.939143
0000028_22.tif	control	LX734	d123	12.797	14.703	5.46362	2.13747	-3.32615	0	0.29777	0.636474	-0.990427
0000028_22.tif	control	LX734	d123	13.516	14.661	5.46362	2.04063	-3.42299	0	0.29777	0.607638	-1.01926
0000028_22.tif	control	LX734	d123	12.281	13.943	5.46362	1.67312	-3.79049	0	0.29777	0.498206	-1.1287
0000028_22.tif	control	LX734	d123	12.224	13.807	5.46362	1.60691	-3.8567	0	0.29777	0.47849	-1.14841
0000028_22.tif	control	LX734	d123	13.26	13.677	5.46362	1.04861	-4.41501	0	0.29777	0.312243	-1.31466
0000028_22.tif	control	LX734	d123	13.531	13.578	5.46362	0.971634	-4.49198	0	0.29777	0.289324	-1.33758
0000028_22.tif	control	LX734	d123	12.224	12.484	5.46362	1.1037	-4.35992	0	0.29777	0.328649	-1.29825
0000028_22.tif	control	LX734	d123	12.615	12.568	5.46362	0.705729	-4.75789	0	0.29777	0.210145	-1.41676
0000028_22.tif	control	LX734	d123	12.74	12.37	5.46362	0.633785	-4.82983	0	0.29777	0.188722	-1.43818
0000028_22.tif	control	LX734	d123	13.13	12.266	5.46362	0.409683	-5.05393	0	0.29777	0.121991	-1.50491
0000028_22.tif	control	LX734	d123	8.896	12.615	5.46362	4.42203	-1.04159	0	0.29777	1.31675	-0.310154
0000028_22.tif	control	LX734	d123	9.432	12.182	5.46362	3.91174	-1.55188	0	0.29777	1.1648	-0.462103
0000028_22.tif	control	LX734	d123	9.339	12.078	5.46362	4.01711	-1.44651	0	0.29777	1.19617	-0.430727
0000028_22.tif	control	LX734	d123	9.802	12.354	5.46362	3.52682	-1.9368	0	0.29777	1.05018	-0.576721
0000028_22.tif	control	LX734	d123	9.016	11.453	5.46362	4.4601	-1.00351	0	0.29777	1.32809	-0.298816
0000028_22.tif	control	LX734	d123	8.849	11.073	5.46362	4.73246	-0.731153	0	0.29777	1.40919	-0.217715
0000028_22.tif	control	LX734	d123	9.651	11.766	5.46362	3.76741	-1.69621	0	0.29777	1.12182	-0.505079
0000028_22.tif	control	LX734	d123	10.818	12.12	5.46362	2.55149	-2.91213	0	0.29777	0.759757	-0.867144
0000028_22.tif	control	LX734	d123	10.911	12.099	5.46362	2.46488	-2.99874	0	0.29777	0.733966	-0.892935
0000028_22.tif	control	LX734	d123	11.146	11.604	5.46362	2.40214	-3.06148	0	0.29777	0.715284	-0.911617
0000028_22.tif	control	LX734	d123	10.542	11.417	5.46362	3.02945	-2.43417	0	0.29777	0.902078	-0.724823
0000028_22.tif	control	LX734	d123	10.901	11.198	5.46362	2.80936	-2.65425	0	0.29777	0.836544	-0.790357
0000028_22.tif	control	LX734	d123	11.474	11.839	5.46362	2.00649	-3.45712	0	0.29777	0.597474	-1.02943
0000028_22.tif	control	LX734	d123	11.74	11.578	5.46362	1.89652	-3.5671	0	0.29777	0.564727	-1.06217
0000028_22.tif	control	LX734	d123	11.948	11.557	5.46362	1.74018	-3.72344	0	0.29777	0.518174	-1.10873
0000028_22.tif	control	LX734	d123	11.896	11.958	5.46362	1.57279	-3.89083	0	0.29777	0.46833	-1.15857
0000028_22.tif	control	LX734	d123	12.292	11.818	5.46362	1.30844	-4.15517	0	0.29777	0.389615	-1.23729
0000028_22.tif	control	LX734	d123	12.354	11.766	5.46362	1.29452	-4.16909	0	0.29777	0.38547	-1.24143
0000028_22.tif	control	LX734	d123	13.526	11.271	5.46362	1.37483	-4.08879	0	0.29777	0.409382	-1.21752
0000028_22.tif	control	LX734	d123	13.323	10.792	5.46362	1.83801	-3.62561	0	0.29777	0.547303	-1.0796
0000028_22.tif	control	LX734	d123	13.484	10.531	5.46362	2.10555	-3.35806	0	0.29777	0.626971	-0.99993
0000028_22.tif	control	LX734	d123	12.922	10.276	5.46362	2.38708	-3.07654	0	0.29777	0.7108	-0.916101
0000028_22.tif	control	LX734	d123	12.974	10.224	5.46362	2.43047	-3.03315	0	0.29777	0.72372	-0.903181
0000028_22.tif	control	LX734	d123	12.99	10.172	5.46362	2.47979	-2.98383	0	0.29777	0.738406	-0.888495
0000028_22.tif	control	LX734	d123	12.146	10.505	5.46362	2.42677	-3.03685	0	0.29777	0.722619	-0.904282
0000028_22.tif	control	LX734	d123	9.667	10.323	5.46362	4.3188	-1.14481	0	0.29777	1.28601	-0.340891
0000028_22.tif	control	LX734	d123	10.464	10.323	5.46362	3.66982	-1.7938	0	0.29777	1.09276	-0.534139
0000028_22.tif	control	LX734	d123	10.089	10.073	5.46362	4.11882	-1.34479	0	0.29777	1.22646	-0.40044
0000028_22.tif	control	LX734	d123	8.464	12.547	5.46362	4.85471	-0.608907	0	0.29777	1.44559	-0.181314
0000028_22.tif	control	LX734	d123	9.422	9.818	5.46362	4.80481	-0.65881	0	0.29777	1.43073	-0.196174
0000028_22.tif	control	LX734	d123	9.406	9.729	5.46362	4.87027	-0.593345	0	0.29777	1.45022	-0.17668
0000028_22.tif	control	LX734	d123	9.417	8.917	5.46362	5.38555	-0.0780642	0	0.29777	1.60366	-0.0232452
0000028_22.tif	control	LX734	d123	9.495	8.891	5.46362	5.34747	-0.116145	0	0.29777	1.59232	-0.0345844
0000028_22.tif	control	LX734	d123	11.766	8.901	5.46362	4.03908	-1.42454	0	0.29777	1.20272	-0.424185
0000028_22.tif	control	LX734	d123	11.536	8.208	5.46362	4.76756	-0.696058	0	0.29777	1.41964	-0.207265
0000028_22.tif	control	LX734	d123	11.469	8.208	5.46362	4.793	-0.670612	0	0.29777	1.42721	-0.199688
0000028_22.tif	control	LX734	d123	11.229	7.693	5.46362	5.36077	-0.102843	0	0.29777	1.59628	-0.0306235
0000028_22.tif	control	LX734	d123	12.391	7.62	5.46362	5.09504	-0.368576	0	0.29777	1.51715	-0.109751
0000028_22.tif	control	LX734	d123	12.432	7.672	5.46362	5.03654	-0.427074	0	0.29777	1.49973	-0.12717
0000028_22.tif	control	LX734	d123	12.328	8.359	5.46362	4.38424	-1.07938	0	0.29777	1.30549	-0.321406
0000028_22.tif	control	LX734	d123	12.375	8.375	5.46362	4.35824	-1.10537	0	0.29777	1.29775	-0.329147
0000028_22.tif	control	LX734	d123	12.677	8.302	5.46362	4.37521	-1.08841	0	0.29777	1.30281	-0.324095
0000028_22.tif	control	LX734	d123	12.839	7.792	5.46362	4.86165	-0.601962	0	0.29777	1.44765	-0.179246
0000028_22.tif	control	LX734	d123	13.323	7.333	5.46362	5.297	-0.166614	0	0.29777	1.57729	-0.0496126
0000028_22.tif	control	LX734	d123	13.479	7.406	5.46362	5.22648	-0.237136	0	0.29777	1.55629	-0.0706119
0000028_22.tif	control	LX734	d123	14.135	7.99	5.46362	4.71138	-0.752237	0	0.29777	1.40291	-0.223994
0000028_22.tif	control	LX734	d123	13.979	8.719	5.46362	3.96646	-1.49715	0	0.29777	1.18109	-0.445807
0000028_22.tif	control	LX734	d123	14.667	8.255	5.46362	4.57826	-0.88536	0	0.29777	1.36327	-0.263634
0000028_22.tif	control	LX734	d123	14.818	8.167	5.46362	4.70833	-0.755286	0	0.29777	1.402	-0.224902
0000028_22.tif	control	LX734	d123	14.755	8.385	5.46362	4.48163	-0.981988	0	0.29777	1.33449	-0.292406
0000028_22.tif	control	LX734	d123	14.802	8.51	5.46362	4.37912	-1.0845	0	0.29777	1.30397	-0.322932
0000028_22.tif	control	LX734	d123	14.969	8.427	5.46362	4.51564	-0.947976	0	0.29777	1.34462	-0.282279
0000028_22.tif	control	LX734	d123	14.917	8.49	5.46362	4.43806	-1.02555	0	0.29777	1.32152	-0.305379
0000028_22.tif	control	LX734	d123	15.167	8.688	5.46362	4.3541	-1.10952	0	0.29777	1.29652	-0.330381
0000028_22.tif	control	LX734	d123	15.193	8.594	5.46362	4.45027	-1.01334	0	0.29777	1.32516	-0.301743
0000028_22.tif	control	LX734	d123	15.552	8.589	5.46362	4.61741	-0.84621	0	0.29777	1.37492	-0.251976
0000028_22.tif	control	LX734	d123	15.661	8.589	5.46362	4.67112	-0.7925	0	0.29777	1.39092	-0.235983
0000028_22.tif	control	LX734	d123	15.604	9.026	5.46362	4.26786	-1.19576	0	0.29777	1.27084	-0.356061
0000028_22.tif	control	LX734	d123	15.974	9.281	5.46362	4.27436	-1.18926	0	0.29777	1.27278	-0.354125
0000028_22.tif	control	LX734	d123	15.927	9.51	5.46362	4.0671	-1.39652	0	0.29777	1.21106	-0.415841
0000028_22.tif	control	LX734	d123	16.016	9.625	5.46362	4.03847	-1.42515	0	0.29777	1.20253	-0.424366
0000028_22.tif	control	LX734	d123	16.411	9.469	5.46362	4.42251	-1.04111	0	0.29777	1.31689	-0.310011
0000028_22.tif	control	LX734	d123	16.323	9.135	5.46362	4.60924	-0.854381	0	0.29777	1.37249	-0.254409
0000028_22.tif	control	LX734	d123	13.682	10.193	5.46362	2.46403	-2.99958	0	0.29777	0.733715	-0.893185
0000028_22.tif	control	LX734	d123	13.719	10.328	5.46362	2.33667	-3.12695	0	0.29777	0.695789	-0.931112
0000028_22.tif	control	LX734	d123	13.526	10.656	5.46362	1.98493	-3.47869	0	0.29777	0.591052	-1.03585
0000028_22.tif	control	LX734	d123	13.766	10.495	5.46362	2.1815	-3.28212	0	0.29777	0.649584	-0.977317
0000028_22.tif	control	LX734	d123	13.786	10.688	5.46362	1.9976	-3.46602	0	0.29777	0.594824	-1.03208
0000028_22.tif	control	LX734	d123	13.927	10.641	5.46362	2.08014	-3.38347	0	0.29777	0.619405	-1.0075
0000028_22.tif	control	LX734	d123	13.797	10.865	5.46362	1.82884	-3.63477	0	0.29777	0.544575	-1.08233
0000028_22.tif	control	LX734	d123	13.917	10.818	5.46362	1.90844	-3.55518	0	0.29777	0.568276	-1.05862
0000028_22.tif	control	LX734	d123	13.911	10.932	5.46362	1.79857	-3.66505	0	0.29777	0.53556	-1.09134
0000028_22.tif	control	LX734	d123	13.943	11.036	5.46362	1.71215	-3.75147	0	0.29777	0.509827	-1.11707
0000028_22.tif	control	LX734	d123	14.068	10.99	5.46362	1.80336	-3.66026	0	0.29777	0.536986	-1.08992
0000028_22.tif	control	LX734	d123	14.302	10.667	5.46362	2.19582	-3.2678	0	0.29777	0.653849	-0.973052
0000028_22.tif	control	LX734	d123	14.62	10.938	5.46362	2.13496	-3.32865	0	0.29777	0.635728	-0.991173
0000028_22.tif	control	LX734	d123	14.828	11.062	5.46362	2.17686	-3.28676	0	0.29777	0.648204	-0.978697
0000028_22.tif	control	LX734	d123	15.365	11.307	5.46362	2.43732	-3.02629	0	0.29777	0.725761	-0.90114
0000028_22.tif	control	LX734	d123	15.562	11.156	5.46362	2.68481	-2.7788	0	0.29777	0.799456	-0.827445
0000028_22.tif	control	LX734	d123	15.51	11.396	5.46362	2.51548	-2.94814	0	0.29777	0.749033	-0.877868
0000028_22.tif	control	LX734	d123	15.755	11.328	5.46362	2.763	-2.70062	0	0.29777	0.822739	-0.804162
0000028_22.tif	control	LX734	d123	15.812	11.469	5.46362	2.75099	-2.71262	0	0.29777	0.819163	-0.807738
0000028_22.tif	control	LX734	d123	16.297	11.432	5.46362	3.21086	-2.25275	0	0.29777	0.956099	-0.670802
0000028_22.tif	control	LX734	d123	16.083	11.005	5.46362	3.20716	-2.25646	0	0.29777	0.954995	-0.671906
0000028_22.tif	control	LX734	d123	16.151	10.745	5.46362	3.40281	-2.06081	0	0.29777	1.01325	-0.613646
0000028_22.tif	control	LX734	d123	15.667	10.667	5.46362	3.06124	-2.40238	0	0.29777	0.911544	-0.715357
0000028_22.tif	control	LX734	d123	14.365	11.448	5.46362	1.57903	-3.88459	0	0.29777	0.470188	-1.15671
0000028_22.tif	control	LX734	d123	14.562	11.526	5.46362	1.66324	-3.80038	0	0.29777	0.495262	-1.13164
0000028_22.tif	control	LX734	d123	13.755	12.464	5.46362	0.467467	-4.99615	0	0.29777	0.139198	-1.4877
0000028_22.tif	control	LX734	d123	13.99	12.375	5.46362	0.718755	-4.74486	0	0.29777	0.214024	-1.41288
0000028_22.tif	control	LX734	d123	13.979	12.255	5.46362	0.759964	-4.70365	0	0.29777	0.226295	-1.40061
0000028_22.tif	control	LX734	d123	14.411	12.615	5.46362	1.0931	-4.37051	0	0.29777	0.325493	-1.30141
0000028_22.tif	control	LX734	d123	14.531	12.62	5.46362	1.21304	-4.25057	0	0.29777	0.361207	-1.26569
0000028_22.tif	control	LX734	d123	14.432	12.724	5.46362	1.11796	-4.34566	0	0.29777	0.332895	-1.29401
0000028_22.tif	control	LX734	d123	14.557	12.458	5.46362	1.25088	-4.21273	0	0.29777	0.372475	-1.25443
0000028_22.tif	control	LX734	d123	14.63	12.578	5.46362	1.31303	-4.15059	0	0.29777	0.390981	-1.23592
0000028_22.tif	control	LX734	d123	14.771	12.661	5.46362	1.45333	-4.01029	0	0.29777	0.432758	-1.19414
0000028_22.tif	control	LX734	d123	14.974	12.604	5.46362	1.6562	-3.80741	0	0.29777	0.493168	-1.13373
0000028_22.tif	control	LX734	d123	15.208	12.448	5.46362	1.89874	-3.56487	0	0.29777	0.565389	-1.06151
0000028_22.tif	control	LX734	d123	15.479	11.844	5.46362	2.2995	-3.16411	0	0.29777	0.684723	-0.942178
0000028_22.tif	control	LX734	d123	16.094	12.651	5.46362	2.77608	-2.68754	0	0.29777	0.826633	-0.800268
0000028_22.tif	control	LX734	d123	15.51	12.807	5.46362	2.19913	-3.26448	0	0.29777	0.654836	-0.972065
0000028_22.tif	control	LX734	d123	15.406	12.901	5.46362	2.10551	-3.3581	0	0.29777	0.626959	-0.999942
0000028_22.tif	control	LX734	d123	15.323	13.125	5.46362	2.0652	-3.39842	0	0.29777	0.614955	-1.01195
0000028_22.tif	control	LX734	d123	15.312	13.417	5.46362	2.14369	-3.31993	0	0.29777	0.638326	-0.988575
0000028_22.tif	control	LX734	d123	15.375	13.536	5.46362	2.24768	-3.21593	0	0.29777	0.669293	-0.957608
0000028_22.tif	control	LX734	d123	15.036	13.26	5.46362	1.82987	-3.63375	0	0.29777	0.54488	-1.08202
0000028_22.tif	control	LX734	d123	15.047	13.177	5.46362	1.81346	-3.65015	0	0.29777	0.539995	-1.08691
0000028_22.tif	control	LX734	d123	14.875	13.12	5.46362	1.63228	-3.83133	0	0.29777	0.486045	-1.14086
0000028_22.tif	control	LX734	d123	14.896	13.224	5.46362	1.6861	-3.77752	0	0.29777	0.502069	-1.12483
0000028_22.tif	control	LX734	d123	14.953	12.958	5.46362	1.66758	-3.79604	0	0.29777	0.496554	-1.13035
0000028_22.tif	control	LX734	d123	14.562	13.167	5.46362	1.35496	-4.10866	0	0.29777	0.403465	-1.22344
0000028_22.tif	control	LX734	d123	14.411	13.26	5.46362	1.26157	-4.20205	0	0.29777	0.375657	-1.25124
0000028_22.tif	control	LX734	d123	14.328	13.349	5.46362	1.23978	-4.22383	0	0.29777	0.36917	-1.25773
0000028_22.tif	control	LX734	d123	14.177	13.516	5.46362	1.23405	-4.22957	0	0.29777	0.367463	-1.25944
0000028_22.tif	control	LX734	d123	14.552	13.505	5.46362	1.51274	-3.95088	0	0.29777	0.450448	-1.17645
0000028_22.tif	control	LX734	d123	14.458	13.573	5.46362	1.47948	-3.98414	0	0.29777	0.440544	-1.18636
0000028_22.tif	control	LX734	d123	14.859	13.49	5.46362	1.76473	-3.69888	0	0.29777	0.525484	-1.10142
0000028_22.tif	control	LX734	d123	14.943	13.604	5.46362	1.89455	-3.56907	0	0.29777	0.564139	-1.06276
0000028_22.tif	control	LX734	d123	13.849	13.891	5.46362	1.36824	-4.09538	0	0.29777	0.407421	-1.21948
0000028_22.tif	control	LX734	d123	13.964	14.01	5.46362	1.52372	-3.9399	0	0.29777	0.453717	-1.17318
0000028_22.tif	control	LX734	d123	14.156	14.047	5.46362	1.64625	-3.81737	0	0.29777	0.490203	-1.1367
0000028_22.tif	control	LX734	d123	13.953	14.406	5.46362	1.88611	-3.57751	0	0.29777	0.561626	-1.06527
0000028_22.tif	control	LX734	d123	14.625	14.724	5.46362	2.46842	-2.9952	0	0.29777	0.735021	-0.89188
0000028_22.tif	control	LX734	d123	14.516	14.667	5.46362	2.36317	-3.10045	0	0.29777	0.703681	-0.92322
0000028_22.tif	control	LX734	d123	13.974	15.672	5.46362	3.11193	-2.35169	0	0.29777	0.926639	-0.700262
0000028_22.tif	control	LX734	d123	13.927	15.745	5.46362	3.17397	-2.28964	0	0.29777	0.945114	-0.681787
0000028_22.tif	control	LX734	d123	15.229	16.422	5.46362	4.24631	-1.2173	0	0.29777	1.26443	-0.362476
0000028_22.tif	control	LX734	d123	15.188	16.323	5.46362	4.13946	-1.32415	0	0.29777	1.23261	-0.394293
0000028_22.tif	control	LX734	d123	15.807	16.151	5.46362	4.31191	-1.15171	0	0.29777	1.28396	-0.342944
0000028_22.tif	control	LX734	d123	16.417	15.885	5.46362	4.49431	-0.969306	0	0.29777	1.33827	-0.28863
0000028_22.tif	control	LX734	d123	16.323	15.724	5.46362	4.3131	-1.15051	0	0.29777	1.28431	-0.342588
0000028_22.tif	control	LX734	d123	15.938	16.88	5.46362	4.99268	-0.470931	0	0.29777	1.48667	-0.140229
0000028_22.tif	control	LX734	d123	16.625	16.193	5.46362	4.8612	-0.602421	0	0.29777	1.44752	-0.179383
0000028_22.tif	control	LX734	d123	16.698	16.156	5.46362	4.88437	-0.579246	0	0.29777	1.45442	-0.172482
0000028_22.tif	control	LX734	d123	16.661	16.016	5.46362	4.75822	-0.705397	0	0.29777	1.41685	-0.210046
0000028_22.tif	control	LX734	d123	17.245	14.203	5.46362	4.23033	-1.23329	0	0.29777	1.25966	-0.367237
0000028_22.tif	control	LX734	d123	16.708	13.057	5.46362	3.41679	-2.04683	0	0.29777	1.01742	-0.609484
0000028_22.tif	control	LX734	d123	17.865	11.625	5.46362	4.65674	-0.806875	0	0.29777	1.38664	-0.240263
0000028_22.tif	control	LX734	d123	17.812	11.365	5.46362	4.66865	-0.79497	0	0.29777	1.39018	-0.236718
0000028_22.tif	control	LX734	d123	16.573	9.109	5.46362	4.79505	-0.66857	0	0.29777	1.42782	-0.19908
0000029_20.tif	control	LX734	d123	5.635	15.552	5.32823	8.33062	3.00239	1	0.29777	2.48061	0.894022
0000029_20.tif	control	LX734	d123	5.79	15.547	5.32823	8.19515	2.86692	1	0.29777	2.44027	0.853683
0000029_20.tif	control	LX734	d123	9.668	18.071	5.32823	7.46175	2.13352	1	0.29777	2.22189	0.635298
0000029_20.tif	control	LX734	d123	9.634	17.918	5.32823	7.33773	2.00949	1	0.29777	2.18495	0.598367
0000029_20.tif	control	LX734	d123	8.802	13.562	5.32823	4.59241	-0.73582	0	0.29777	1.36748	-0.219105
0000029_20.tif	control	LX734	d123	8.88	13.474	5.32823	4.48132	-0.846913	0	0.29777	1.3344	-0.252185
0000029_20.tif	control	LX734	d123	8.943	13.401	5.32823	4.39091	-0.937318	0	0.29777	1.30748	-0.279105
0000029_20.tif	control	LX734	d123	9.068	13.224	5.32823	4.19747	-1.13076	0	0.29777	1.24988	-0.336707
0000029_20.tif	control	LX734	d123	9.307	13.286	5.32823	4.01699	-1.31124	0	0.29777	1.19614	-0.390448
0000029_20.tif	control	LX734	d123	9.24	14.052	5.32823	4.49914	-0.829091	0	0.29777	1.33971	-0.246878
0000029_20.tif	control	LX734	d123	9.807	14.922	5.32823	4.69901	-0.629219	0	0.29777	1.39923	-0.187363
0000029_20.tif	control	LX734	d123	9.906	14.849	5.32823	4.5798	-0.74843	0	0.29777	1.36373	-0.22286
0000029_20.tif	control	LX734	d123	9.917	14.771	5.32823	4.51255	-0.815686	0	0.29777	1.3437	-0.242887
0000029_20.tif	control	LX734	d123	10.125	14.823	5.32823	4.42405	-0.904178	0	0.29777	1.31735	-0.269237
0000029_20.tif	control	LX734	d123	11.031	15	5.32823	4.10256	-1.22568	0	0.29777	1.22162	-0.36497
0000029_20.tif	control	LX734	d123	11.833	15.734	5.32823	4.54051	-0.787718	0	0.29777	1.35203	-0.234559
0000029_20.tif	control	LX734	d123	9.854	13.458	5.32823	3.65119	-1.67704	0	0.29777	1.08721	-0.499374
0000029_20.tif	control	LX734	d123	8.677	12.234	5.32823	4.22521	-1.10303	0	0.29777	1.25814	-0.328448
0000029_20.tif	control	LX734	d123	10.12	12.953	5.32823	3.1478	-2.18043	0	0.29777	0.937321	-0.649266
0000029_20.tif	control	LX734	d123	10.156	12.797	5.32823	3.03725	-2.29098	0	0.29777	0.904402	-0.682186
0000029_20.tif	control	LX734	d123	10.12	12.609	5.32823	2.98122	-2.34701	0	0.29777	0.887718	-0.69887
0000029_20.tif	control	LX734	d123	10.047	12.51	5.32823	3.00564	-2.32259	0	0.29777	0.894989	-0.691598
0000029_20.tif	control	LX734	d123	10.943	13.177	5.32823	2.6404	-2.68783	0	0.29777	0.786232	-0.800356
0000029_20.tif	control	LX734	d123	11.469	12.682	5.32823	1.9188	-3.40943	0	0.29777	0.571362	-1.01523
0000029_20.tif	control	LX734	d123	10.667	12.25	5.32823	2.33348	-2.99476	0	0.29777	0.694839	-0.891749
0000029_20.tif	control	LX734	d123	10.661	12.089	5.32823	2.2781	-3.05013	0	0.29777	0.678351	-0.908237
0000029_20.tif	control	LX734	d123	11.661	11.812	5.32823	1.24729	-4.08095	0	0.29777	0.371404	-1.21518
0000029_20.tif	control	LX734	d123	11.234	11.516	5.32823	1.57827	-3.74996	0	0.29777	0.469961	-1.11663
0000029_20.tif	control	LX734	d123	9.812	11.818	5.32823	3.03013	-2.29811	0	0.29777	0.902281	-0.684307
0000029_20.tif	control	LX734	d123	9.859	11.5	5.32823	2.945	-2.38323	0	0.29777	0.876934	-0.709654
0000029_20.tif	control	LX734	d123	9.729	11.307	5.32823	3.06802	-2.26022	0	0.29777	0.913563	-0.673025
0000029_20.tif	control	LX734	d123	9.63	11.193	5.32823	3.16871	-2.15953	0	0.29777	0.943546	-0.643042
0000029_20.tif	control	LX734	d123	7.844	10.078	5.32823	5.1008	-0.227431	0	0.29777	1.51887	-0.0677222
0000029_20.tif	control	LX734	d123	7.938	10.089	5.32823	5.00691	-0.321323	0	0.29777	1.49091	-0.0956802
0000029_20.tif	control	LX734	d123	9.891	11.062	5.32823	2.91549	-2.41275	0	0.29777	0.868144	-0.718443
0000029_20.tif	control	LX734	d123	10.01	10.984	5.32823	2.80452	-2.52371	0	0.29777	0.835102	-0.751485
0000029_20.tif	control	LX734	d123	10.312	10.802	5.32823	2.53382	-2.79441	0	0.29777	0.754496	-0.832092
0000029_20.tif	control	LX734	d123	10.297	11.172	5.32823	2.50312	-2.82511	0	0.29777	0.745355	-0.841233
0000029_20.tif	control	LX734	d123	10.474	10.984	5.32823	2.34399	-2.98424	0	0.29777	0.69797	-0.888617
0000029_20.tif	control	LX734	d123	11.047	10.922	5.32823	1.78973	-3.5385	0	0.29777	0.532927	-1.05366
0000029_20.tif	control	LX734	d123	11.115	10.818	5.32823	1.74888	-3.57936	0	0.29777	0.520763	-1.06583
0000029_20.tif	control	LX734	d123	11.026	10.672	5.32823	1.87805	-3.45018	0	0.29777	0.559226	-1.02736
0000029_20.tif	control	LX734	d123	11.13	10.589	5.32823	1.81112	-3.51711	0	0.29777	0.539297	-1.04729
0000029_20.tif	control	LX734	d123	10.901	10.292	5.32823	2.14589	-3.18234	0	0.29777	0.638981	-0.947606
0000029_20.tif	control	LX734	d123	10.995	10.073	5.32823	2.17839	-3.14984	0	0.29777	0.648659	-0.937929
0000029_20.tif	control	LX734	d123	11.427	10.224	5.32823	1.74018	-3.58805	0	0.29777	0.518174	-1.06841
0000029_20.tif	control	LX734	d123	10.245	9.307	5.32823	3.23617	-2.09206	0	0.29777	0.963635	-0.622953
0000029_20.tif	control	LX734	d123	10.245	9.198	5.32823	3.30432	-2.02392	0	0.29777	0.983926	-0.602662
0000029_20.tif	control	LX734	d123	11.729	9.026	5.32823	2.50959	-2.81864	0	0.29777	0.747282	-0.839306
0000029_20.tif	control	LX734	d123	11.75	8.906	5.32823	2.61019	-2.71804	0	0.29777	0.777236	-0.809352
0000029_20.tif	control	LX734	d123	11.755	8.74	5.32823	2.76116	-2.56707	0	0.29777	0.822191	-0.764397
0000029_20.tif	control	LX734	d123	11.901	8.646	5.32823	2.79832	-2.52991	0	0.29777	0.833257	-0.753331
0000029_20.tif	control	LX734	d123	11.682	8.604	5.32823	2.9147	-2.41353	0	0.29777	0.86791	-0.718678
0000029_20.tif	control	LX734	d123	11.719	8.542	5.32823	2.9584	-2.36984	0	0.29777	0.880922	-0.705666
0000029_20.tif	control	LX734	d123	8.536	7.708	5.32823	5.57109	0.242858	1	0.29777	1.6589	0.0723157
0000029_20.tif	control	LX734	d123	10.734	8.036	5.32823	3.85877	-1.46946	0	0.29777	1.14903	-0.437562
0000029_20.tif	control	LX734	d123	11.073	8.167	5.32823	3.57338	-1.75485	0	0.29777	1.06405	-0.522541
0000029_20.tif	control	LX734	d123	11.281	8.005	5.32823	3.6243	-1.70394	0	0.29777	1.07921	-0.507381
0000029_20.tif	control	LX734	d123	11.333	7.245	5.32823	4.30836	-1.01987	0	0.29777	1.2829	-0.303686
0000029_20.tif	control	LX734	d123	15.01	6.823	5.32823	4.9914	-0.336835	0	0.29777	1.48629	-0.100299
0000029_20.tif	control	LX734	d123	14.781	7.443	5.32823	4.33469	-0.993538	0	0.29777	1.29074	-0.295846
0000029_20.tif	control	LX734	d123	14.839	7.38	5.32823	4.41731	-0.910919	0	0.29777	1.31534	-0.271244
0000029_20.tif	control	LX734	d123	15.062	7.37	5.32823	4.53338	-0.79485	0	0.29777	1.34991	-0.236683
0000029_20.tif	control	LX734	d123	13.74	7.562	5.32823	3.8522	-1.47603	0	0.29777	1.14707	-0.439517
0000029_20.tif	control	LX734	d123	13.818	7.557	5.32823	3.87686	-1.45137	0	0.29777	1.15441	-0.432175
0000029_20.tif	control	LX734	d123	13.922	7.63	5.32823	3.83569	-1.49254	0	0.29777	1.14215	-0.444434
0000029_20.tif	control	LX734	d123	14.057	7.724	5.32823	3.78866	-1.53957	0	0.29777	1.12815	-0.458439
0000029_20.tif	control	LX734	d123	14.109	7.828	5.32823	3.70881	-1.61942	0	0.29777	1.10437	-0.482214
0000029_20.tif	control	LX734	d123	12.693	9.047	5.32823	2.2524	-3.07583	0	0.29777	0.670698	-0.91589
0000029_20.tif	control	LX734	d123	12.729	8.943	5.32823	2.35498	-2.97325	0	0.29777	0.701243	-0.885345
0000029_20.tif	control	LX734	d123	12.922	8.62	5.32823	2.67992	-2.64832	0	0.29777	0.797999	-0.788589
0000029_20.tif	control	LX734	d123	13.208	9.01	5.32823	2.32364	-3.0046	0	0.29777	0.691909	-0.894678
0000029_20.tif	control	LX734	d123	13.385	8.932	5.32823	2.437	-2.89123	0	0.29777	0.725665	-0.860922
0000029_20.tif	control	LX734	d123	13.609	8.651	5.32823	2.76779	-2.56044	0	0.29777	0.824165	-0.762423
0000029_20.tif	control	LX734	d123	14.984	8.786	5.32823	3.32988	-1.99835	0	0.29777	0.991538	-0.59505
0000029_20.tif	control	LX734	d123	15.146	8.792	5.32823	3.43407	-1.89416	0	0.29777	1.02256	-0.564025
0000029_20.tif	control	LX734	d123	15.25	8.74	5.32823	3.54337	-1.78486	0	0.29777	1.05511	-0.531479
0000029_20.tif	control	LX734	d123	13.083	9.688	5.32823	1.63422	-3.69401	0	0.29777	0.486622	-1.09997
0000029_20.tif	control	LX734	d123	12.443	10.25	5.32823	1.10523	-4.22301	0	0.29777	0.329103	-1.25748
0000029_20.tif	control	LX734	d123	12.891	10.401	5.32823	0.900917	-4.42731	0	0.29777	0.268266	-1.31832
0000029_20.tif	control	LX734	d123	12.125	11.198	5.32823	0.679253	-4.64898	0	0.29777	0.202261	-1.38433
0000029_20.tif	control	LX734	d123	13.651	11.245	5.32823	0.855582	-4.47265	0	0.29777	0.254767	-1.33182
0000029_20.tif	control	LX734	d123	13.979	11.292	5.32823	1.18201	-4.14622	0	0.29777	0.351967	-1.23462
0000029_20.tif	control	LX734	d123	14.068	11.344	5.32823	1.27187	-4.05636	0	0.29777	0.378724	-1.20786
0000029_20.tif	control	LX734	d123	14.37	11.135	5.32823	1.58132	-3.74691	0	0.29777	0.47087	-1.11572
0000029_20.tif	control	LX734	d123	14.573	10.255	5.32823	2.05911	-3.26912	0	0.29777	0.613142	-0.973446
0000029_20.tif	control	LX734	d123	16.583	9.979	5.32823	4.00886	-1.31938	0	0.29777	1.19372	-0.392871
0000029_20.tif	control	LX734	d123	16.568	10.073	5.32823	3.96467	-1.36356	0	0.29777	1.18056	-0.406028
0000029_20.tif	control	LX734	d123	16.104	10.427	5.32823	3.41952	-1.90871	0	0.29777	1.01823	-0.568356
0000029_20.tif	control	LX734	d123	16.036	10.771	5.32823	3.28143	-2.0468	0	0.29777	0.977112	-0.609476
0000029_20.tif	control	LX734	d123	15.953	10.807	5.32823	3.19381	-2.13442	0	0.29777	0.951021	-0.635566
0000029_20.tif	control	LX734	d123	16.505	10.917	5.32823	3.72742	-1.60081	0	0.29777	1.10991	-0.476674
0000029_20.tif	control	LX734	d123	16.578	10.995	5.32823	3.79304	-1.53519	0	0.29777	1.12945	-0.457134
0000029_20.tif	control	LX734	d123	15.141	11.375	5.32823	2.3453	-2.98293	0	0.29777	0.698359	-0.888228
0000029_20.tif	control	LX734	d123	14.927	11.661	5.32823	2.16088	-3.16735	0	0.29777	0.643445	-0.943143
0000029_20.tif	control	LX734	d123	14.875	11.75	5.32823	2.1268	-3.20143	0	0.29777	0.633298	-0.953289
0000029_20.tif	control	LX734	d123	14.667	11.891	5.32823	1.96207	-3.36616	0	0.29777	0.584247	-1.00234
0000029_20.tif	control	LX734	d123	13.745	11.479	5.32823	0.965312	-4.36292	0	0.29777	0.287441	-1.29915
0000029_20.tif	control	LX734	d123	13.995	11.818	5.32823	1.30639	-4.02185	0	0.29777	0.389003	-1.19759
0000029_20.tif	control	LX734	d123	13.453	12	5.32823	0.961533	-4.3667	0	0.29777	0.286316	-1.30027
0000029_20.tif	control	LX734	d123	12.964	11.943	5.32823	0.667237	-4.661	0	0.29777	0.198683	-1.3879
0000029_20.tif	control	LX734	d123	12.917	11.974	5.32823	0.687553	-4.64068	0	0.29777	0.204733	-1.38186
0000029_20.tif	control	LX734	d123	13.604	12.323	5.32823	1.30534	-4.02289	0	0.29777	0.388693	-1.1979
0000029_20.tif	control	LX734	d123	14.13	12.24	5.32823	1.63283	-3.6954	0	0.29777	0.486208	-1.10038
0000029_20.tif	control	LX734	d123	15.161	12.474	5.32823	2.6408	-2.68743	0	0.29777	0.786351	-0.800237
0000029_20.tif	control	LX734	d123	15.292	12.234	5.32823	2.66514	-2.66309	0	0.29777	0.7936	-0.792988
0000029_20.tif	control	LX734	d123	15.333	12.839	5.32823	2.96801	-2.36023	0	0.29777	0.883783	-0.702805
0000029_20.tif	control	LX734	d123	15.146	13.089	5.32823	2.9545	-2.37373	0	0.29777	0.879761	-0.706827
0000029_20.tif	control	LX734	d123	15.021	13.115	5.32823	2.87251	-2.45572	0	0.29777	0.855347	-0.731241
0000029_20.tif	control	LX734	d123	12.786	13	5.32823	1.70304	-3.6252	0	0.29777	0.507113	-1.07947
0000029_20.tif	control	LX734	d123	13.078	13.281	5.32823	2.0038	-3.32443	0	0.29777	0.596672	-0.989916
0000029_20.tif	control	LX734	d123	12.984	13.422	5.32823	2.13321	-3.19502	0	0.29777	0.635207	-0.951381
0000029_20.tif	control	LX734	d123	15.37	13.562	5.32823	3.42791	-1.90032	0	0.29777	1.02073	-0.56586
0000029_20.tif	control	LX734	d123	15.656	13.458	5.32823	3.58383	-1.74441	0	0.29777	1.06716	-0.519432
0000029_20.tif	control	LX734	d123	16.188	13.677	5.32823	4.14286	-1.18537	0	0.29777	1.23362	-0.352969
0000029_20.tif	control	LX734	d123	12.526	13.87	5.32823	2.58723	-2.741	0	0.29777	0.7704	-0.816188
0000029_20.tif	control	LX734	d123	12.052	14.365	5.32823	3.15716	-2.17107	0	0.29777	0.940107	-0.646481
0000029_20.tif	control	LX734	d123	12.182	15.094	5.32823	3.84648	-1.48175	0	0.29777	1.14537	-0.44122
0000029_20.tif	control	LX734	d123	12.26	15.115	5.32823	3.85558	-1.47265	0	0.29777	1.14808	-0.438512
0000029_20.tif	control	LX734	d123	12.068	15.583	5.32823	4.34756	-0.980677	0	0.29777	1.29457	-0.292016
0000029_20.tif	control	LX734	d123	12.802	15.802	5.32823	4.505	-0.823229	0	0.29777	1.34145	-0.245133
0000029_20.tif	control	LX734	d123	12.703	15.62	5.32823	4.32402	-1.00421	0	0.29777	1.28756	-0.299024
0000029_20.tif	control	LX734	d123	12.682	15.161	5.32823	3.86571	-1.46252	0	0.29777	1.15109	-0.435495
0000029_20.tif	control	LX734	d123	12.911	15.365	5.32823	4.0696	-1.25864	0	0.29777	1.2118	-0.374784
0000029_20.tif	control	LX734	d123	12.99	15.286	5.32823	3.99367	-1.33457	0	0.29777	1.18919	-0.397394
0000029_20.tif	control	LX734	d123	13.052	14.807	5.32823	3.51925	-1.80898	0	0.29777	1.04793	-0.53866
0000029_20.tif	control	LX734	d123	13.146	14.828	5.32823	3.54821	-1.78003	0	0.29777	1.05655	-0.530039
0000029_20.tif	control	LX734	d123	13.734	15.656	5.32823	4.45857	-0.869662	0	0.29777	1.32763	-0.258959
0000029_20.tif	control	LX734	d123	13.839	15.964	5.32823	4.78191	-0.546323	0	0.29777	1.42391	-0.162679
0000029_20.tif	control	LX734	d123	13.536	15.995	5.32823	4.75577	-0.572465	0	0.29777	1.41612	-0.170463
0000029_20.tif	control	LX734	d123	13.76	14.943	5.32823	3.77103	-1.5572	0	0.29777	1.1229	-0.463687
0000029_20.tif	control	LX734	d123	13.849	14.875	5.32823	3.72945	-1.59878	0	0.29777	1.11052	-0.47607
0000029_20.tif	control	LX734	d123	13.958	14.984	5.32823	3.86547	-1.46276	0	0.29777	1.15102	-0.435565
0000029_20.tif	control	LX734	d123	13.932	15.146	5.32823	4.01286	-1.31537	0	0.29777	1.19491	-0.391679
0000029_20.tif	control	LX734	d123	13.755	14.807	5.32823	3.63839	-1.68984	0	0.29777	1.0834	-0.503185
0000029_20.tif	control	LX734	d123	13.755	14.661	5.32823	3.49775	-1.83048	0	0.29777	1.04153	-0.545062
0000029_20.tif	control	LX734	d123	13.922	14.5	5.32823	3.39482	-1.93341	0	0.29777	1.01088	-0.575711
0000029_20.tif	control	LX734	d123	13.88	14.062	5.32823	2.96953	-2.3587	0	0.29777	0.884237	-0.70235
0000029_20.tif	control	LX734	d123	13.859	13.953	5.32823	2.86045	-2.46778	0	0.29777	0.851756	-0.734831
0000029_20.tif	control	LX734	d123	14.182	13.906	5.32823	2.95383	-2.3744	0	0.29777	0.879562	-0.707026
0000029_20.tif	control	LX734	d123	16.141	17.583	5.32823	7.12012	1.79189	1	0.29777	2.12016	0.533571
0000029_20.tif	control	LX734	d123	16.203	17.484	5.32823	7.06256	1.73433	1	0.29777	2.10302	0.516432
0000029_20.tif	control	LX734	d123	15.807	16.646	5.32823	6.13774	0.809512	1	0.29777	1.82764	0.241048
0000029_20.tif	control	LX734	d123	15.552	16.078	5.32823	5.51797	0.189737	1	0.29777	1.64309	0.056498
0000029_20.tif	control	LX734	d123	16.188	13.896	5.32823	4.27243	-1.0558	0	0.29777	1.2722	-0.314385
0000029_20.tif	control	LX734	d123	16.656	14.365	5.32823	4.92996	-0.398272	0	0.29777	1.46799	-0.118594
0000029_20.tif	control	LX734	d123	16.734	14.354	5.32823	4.9845	-0.343734	0	0.29777	1.48423	-0.102354
0000029_20.tif	control	LX734	d123	17.464	14.302	5.32823	5.55076	0.222526	1	0.29777	1.65285	0.0662615
0000029_20.tif	control	LX734	d123	17.219	13.755	5.32823	5.05923	-0.268998	0	0.29777	1.50649	-0.0800996
0000029_20.tif	control	LX734	d123	17.016	13.328	5.32823	4.68241	-0.645827	0	0.29777	1.39428	-0.192308
0000029_20.tif	control	LX734	d123	17.12	12.297	5.32823	4.43715	-0.891079	0	0.29777	1.32125	-0.265337
0000029_20.tif	control	LX734	d123	17.292	12.25	5.32823	4.59491	-0.733318	0	0.29777	1.36823	-0.21836
0000029_20.tif	control	LX734	d123	17.609	10.802	5.32823	4.83739	-0.490839	0	0.29777	1.44043	-0.146157
0000029_20.tif	control	LX734	d123	17.646	10.688	5.32823	4.88709	-0.441139	0	0.29777	1.45523	-0.131358
0000029_20.tif	control	LX734	d123	16.927	9.708	5.32823	4.42514	-0.903097	0	0.29777	1.31767	-0.268915
0000030_38.tif	control	N2	wt	8.76	13.052	5.40622	5.23266	-0.173555	0	0.29777	1.55813	-0.0516796
0000030_38.tif	control	N2	wt	8.807	12.936	5.40622	5.14606	-0.260156	0	0.29777	1.53234	-0.0774665
0000030_38.tif	control	N2	wt	8.898	13.29	5.40622	5.20207	-0.204151	0	0.29777	1.54902	-0.0607899
0000030_38.tif	control	N2	wt	9.425	12.762	5.40622	4.50741	-0.898808	0	0.29777	1.34217	-0.267638
0000030_38.tif	control	N2	wt	9.585	12.519	5.40622	4.27121	-1.135	0	0.29777	1.27184	-0.33797
0000030_38.tif	control	N2	wt	9.835	14.283	5.40622	4.9507	-0.455517	0	0.29777	1.47417	-0.135639
0000030_38.tif	control	N2	wt	10.238	14.387	5.40622	4.72362	-0.682604	0	0.29777	1.40655	-0.203259
0000030_38.tif	control	N2	wt	10.384	14.311	5.40622	4.56651	-0.839707	0	0.29777	1.35977	-0.250039
0000030_38.tif	control	N2	wt	10.474	14.665	5.40622	4.76438	-0.641835	0	0.29777	1.41869	-0.191119
0000030_38.tif	control	N2	wt	10.96	14.304	5.40622	4.17494	-1.23128	0	0.29777	1.24317	-0.366639
0000030_38.tif	control	N2	wt	10.981	14.359	5.40622	4.20451	-1.20171	0	0.29777	1.25198	-0.357832
0000030_38.tif	control	N2	wt	10.714	13.667	5.40622	3.88342	-1.5228	0	0.29777	1.15637	-0.453445
0000030_38.tif	control	N2	wt	10.823	13.318	5.40622	3.57407	-1.83215	0	0.29777	1.06425	-0.545559
0000030_38.tif	control	N2	wt	10.906	13.302	5.40622	3.49966	-1.90656	0	0.29777	1.04209	-0.567715
0000030_38.tif	control	N2	wt	11.505	13.349	5.40622	3.09612	-2.3101	0	0.29777	0.921933	-0.687878
0000030_38.tif	control	N2	wt	11.641	13.25	5.40622	2.93133	-2.47489	0	0.29777	0.872862	-0.736948
0000030_38.tif	control	N2	wt	11.688	13.49	5.40622	3.08431	-2.32191	0	0.29777	0.918414	-0.691396
0000030_38.tif	control	N2	wt	11.833	13.443	5.40622	2.9586	-2.44762	0	0.29777	0.880984	-0.728826
0000030_38.tif	control	N2	wt	11.943	13.656	5.40622	3.07096	-2.33526	0	0.29777	0.91444	-0.69537
0000030_38.tif	control	N2	wt	11.87	13.958	5.40622	3.366	-2.04022	0	0.29777	1.00229	-0.607515
0000030_38.tif	control	N2	wt	11.281	14.224	5.40622	3.91473	-1.49149	0	0.29777	1.16569	-0.44412
0000030_38.tif	control	N2	wt	11.182	14.771	5.40622	4.42055	-0.985667	0	0.29777	1.31631	-0.293502
0000030_38.tif	control	N2	wt	11.281	14.781	5.40622	4.37557	-1.03065	0	0.29777	1.30291	-0.306897
0000030_38.tif	control	N2	wt	11.109	15.089	5.40622	4.72793	-0.678294	0	0.29777	1.40783	-0.201976
0000030_38.tif	control	N2	wt	11.297	15.24	5.40622	4.763	-0.643223	0	0.29777	1.41828	-0.191533
0000030_38.tif	control	N2	wt	11.37	15.495	5.40622	4.95427	-0.451945	0	0.29777	1.47523	-0.134576
0000030_38.tif	control	N2	wt	11.438	15.656	5.40622	5.06907	-0.337152	0	0.29777	1.50942	-0.100394
0000030_38.tif	control	N2	wt	11.818	15.229	5.40622	4.52351	-0.882711	0	0.29777	1.34697	-0.262845
0000030_38.tif	control	N2	wt	11.948	15.188	5.40622	4.43571	-0.970506	0	0.29777	1.32082	-0.288987
0000030_38.tif	control	N2	wt	11.792	15.125	5.40622	4.4387	-0.967521	0	0.29777	1.32171	-0.288099
0000030_38.tif	control	N2	wt	12.042	14.38	5.40622	3.65733	-1.74889	0	0.29777	1.08904	-0.520766
0000030_38.tif	control	N2	wt	12.177	14.328	5.40622	3.55406	-1.85216	0	0.29777	1.05829	-0.551517
0000030_38.tif	control	N2	wt	12.339	14.031	5.40622	3.21714	-2.18908	0	0.29777	0.957968	-0.651842
0000030_38.tif	control	N2	wt	12.349	13.833	5.40622	3.03193	-2.37429	0	0.29777	0.902819	-0.706991
0000030_38.tif	control	N2	wt	12.359	13.307	5.40622	2.5575	-2.84872	0	0.29777	0.761545	-0.848265
0000030_38.tif	control	N2	wt	12.365	13.219	5.40622	2.47799	-2.92823	0	0.29777	0.737871	-0.871939
0000030_38.tif	control	N2	wt	12.302	12.391	5.40622	1.85265	-3.55357	0	0.29777	0.551665	-1.05815
0000030_38.tif	control	N2	wt	12.141	12.391	5.40622	1.96914	-3.43708	0	0.29777	0.586349	-1.02346
0000030_38.tif	control	N2	wt	11.109	12.016	5.40622	2.66726	-2.73896	0	0.29777	0.79423	-0.81558
0000030_38.tif	control	N2	wt	11.016	12.016	5.40622	2.75445	-2.65177	0	0.29777	0.820192	-0.789618
0000030_38.tif	control	N2	wt	10.844	12.016	5.40622	2.91665	-2.48957	0	0.29777	0.868491	-0.741319
0000030_38.tif	control	N2	wt	8.594	11.505	5.40622	5.02859	-0.377629	0	0.29777	1.49736	-0.112447
0000030_38.tif	control	N2	wt	8.589	11.401	5.40622	5.02571	-0.380505	0	0.29777	1.49651	-0.113303
0000030_38.tif	control	N2	wt	9.974	11	5.40622	3.63073	-1.77549	0	0.29777	1.08112	-0.528686
0000030_38.tif	control	N2	wt	9.943	10.854	5.40622	3.66754	-1.73868	0	0.29777	1.09208	-0.517725
0000030_38.tif	control	N2	wt	10.667	11.729	5.40622	3.00937	-2.39685	0	0.29777	0.8961	-0.71371
0000030_38.tif	control	N2	wt	10.755	11.469	5.40622	2.87639	-2.52983	0	0.29777	0.856503	-0.753308
0000030_38.tif	control	N2	wt	10.766	11.307	5.40622	2.84763	-2.55859	0	0.29777	0.847939	-0.761871
0000030_38.tif	control	N2	wt	10.859	11.276	5.40622	2.7525	-2.65372	0	0.29777	0.819611	-0.790199
0000030_38.tif	control	N2	wt	10.833	11.078	5.40622	2.771	-2.63522	0	0.29777	0.825122	-0.784688
0000030_38.tif	control	N2	wt	10.927	11.062	5.40622	2.67702	-2.7292	0	0.29777	0.797137	-0.812673
0000030_38.tif	control	N2	wt	11.661	11.125	5.40622	1.9437	-3.46252	0	0.29777	0.578774	-1.03104
0000030_38.tif	control	N2	wt	12.062	10.745	5.40622	1.5765	-3.82972	0	0.29777	0.469434	-1.14038
0000030_38.tif	control	N2	wt	12.188	10.63	5.40622	1.48368	-3.92254	0	0.29777	0.441795	-1.16801
0000030_38.tif	control	N2	wt	12.323	10.38	5.40622	1.45644	-3.94978	0	0.29777	0.433683	-1.17613
0000030_38.tif	control	N2	wt	12.224	10.099	5.40622	1.68911	-3.71711	0	0.29777	0.502965	-1.10685
0000030_38.tif	control	N2	wt	11.844	10.583	5.40622	1.82694	-3.57928	0	0.29777	0.544007	-1.0658
0000030_38.tif	control	N2	wt	11.724	10.526	5.40622	1.95796	-3.44826	0	0.29777	0.583022	-1.02679
0000030_38.tif	control	N2	wt	11.615	10.38	5.40622	2.10627	-3.29995	0	0.29777	0.627184	-0.982626
0000030_38.tif	control	N2	wt	11.281	9.932	5.40622	2.58809	-2.81813	0	0.29777	0.770656	-0.839155
0000030_38.tif	control	N2	wt	11.562	9.661	5.40622	2.48264	-2.92358	0	0.29777	0.739256	-0.870554
0000030_38.tif	control	N2	wt	9.38	9.354	5.40622	4.56039	-0.845832	0	0.29777	1.35795	-0.251863
0000030_38.tif	control	N2	wt	11.734	6.865	5.40622	4.6048	-0.801422	0	0.29777	1.37117	-0.238639
0000030_38.tif	control	N2	wt	11.677	6.766	5.40622	4.71843	-0.68779	0	0.29777	1.40501	-0.204803
0000030_38.tif	control	N2	wt	10.323	6.016	5.40622	6.02812	0.621898	1	0.29777	1.79499	0.185183
0000030_38.tif	control	N2	wt	11.62	5.594	5.40622	5.82715	0.420932	1	0.29777	1.73515	0.125341
0000030_38.tif	control	N2	wt	12.042	5.417	5.40622	5.86772	0.461504	1	0.29777	1.74723	0.137422
0000030_38.tif	control	N2	wt	12.745	5.568	5.40622	5.57162	0.165396	1	0.29777	1.65906	0.04925
0000030_38.tif	control	N2	wt	12.891	5.554	5.40622	5.56487	0.158646	1	0.29777	1.65705	0.0472399
0000030_38.tif	control	N2	wt	13.464	5.656	5.40622	5.41881	0.0125889	1	0.29777	1.61356	0.0037486
0000030_38.tif	control	N2	wt	13.38	6.13	5.40622	4.94807	-0.458147	0	0.29777	1.47339	-0.136422
0000030_38.tif	control	N2	wt	13.547	6.495	5.40622	4.57835	-0.827865	0	0.29777	1.3633	-0.246513
0000030_38.tif	control	N2	wt	14.214	6.266	5.40622	4.84555	-0.560671	0	0.29777	1.44286	-0.166951
0000030_38.tif	control	N2	wt	14.271	6.203	5.40622	4.91546	-0.490756	0	0.29777	1.46368	-0.146132
0000030_38.tif	control	N2	wt	14.26	6.536	5.40622	4.58418	-0.82204	0	0.29777	1.36503	-0.244779
0000030_38.tif	control	N2	wt	13.865	7.297	5.40622	3.78501	-1.62121	0	0.29777	1.12706	-0.482748
0000030_38.tif	control	N2	wt	13.417	7.349	5.40622	3.72869	-1.67753	0	0.29777	1.11029	-0.499517
0000030_38.tif	control	N2	wt	13.781	7.646	5.40622	3.43157	-1.97465	0	0.29777	1.02182	-0.587992
0000030_38.tif	control	N2	wt	13.708	7.703	5.40622	3.3716	-2.03462	0	0.29777	1.00396	-0.605847
0000030_38.tif	control	N2	wt	13.75	7.948	5.40622	3.12841	-2.27781	0	0.29777	0.931546	-0.678264
0000030_38.tif	control	N2	wt	12.87	8.927	5.40622	2.26805	-3.13817	0	0.29777	0.675359	-0.934451
0000030_38.tif	control	N2	wt	14.307	7.823	5.40622	3.32516	-2.08106	0	0.29777	0.990134	-0.619676
0000030_38.tif	control	N2	wt	14.87	8.656	5.40622	2.72849	-2.67773	0	0.29777	0.812462	-0.797348
0000030_38.tif	control	N2	wt	14.901	8.781	5.40622	2.63353	-2.77269	0	0.29777	0.784186	-0.825624
0000030_38.tif	control	N2	wt	15.078	8.891	5.40622	2.63321	-2.77301	0	0.29777	0.784091	-0.825719
0000030_38.tif	control	N2	wt	14.453	8.766	5.40622	2.45826	-2.94796	0	0.29777	0.731997	-0.877814
0000030_38.tif	control	N2	wt	14.661	9.25	5.40622	2.10727	-3.29895	0	0.29777	0.627481	-0.982329
0000030_38.tif	control	N2	wt	14.771	9.25	5.40622	2.16454	-3.24168	0	0.29777	0.644534	-0.965276
0000030_38.tif	control	N2	wt	14.51	9.458	5.40622	1.85177	-3.55445	0	0.29777	0.551402	-1.05841
0000030_38.tif	control	N2	wt	14.047	9.297	5.40622	1.83042	-3.5758	0	0.29777	0.545043	-1.06477
0000030_38.tif	control	N2	wt	14.146	9.682	5.40622	1.49286	-3.91336	0	0.29777	0.44453	-1.16528
0000030_38.tif	control	N2	wt	12.484	10.729	5.40622	1.17164	-4.23458	0	0.29777	0.348879	-1.26093
0000030_38.tif	control	N2	wt	12.594	10.776	5.40622	1.05276	-4.35346	0	0.29777	0.313481	-1.29633
0000030_38.tif	control	N2	wt	12.51	11.38	5.40622	1.13626	-4.26996	0	0.29777	0.338344	-1.27147
0000030_38.tif	control	N2	wt	12.849	11.172	5.40622	0.761463	-4.64476	0	0.29777	0.226741	-1.38307
0000030_38.tif	control	N2	wt	12.901	11.057	5.40622	0.703182	-4.70304	0	0.29777	0.209387	-1.40042
0000030_38.tif	control	N2	wt	13.099	10.266	5.40622	0.951984	-4.45424	0	0.29777	0.283472	-1.32634
0000030_38.tif	control	N2	wt	13.422	10.057	5.40622	1.03217	-4.37405	0	0.29777	0.30735	-1.30246
0000030_38.tif	control	N2	wt	13.474	10.156	5.40622	0.926169	-4.48005	0	0.29777	0.275785	-1.33402
0000030_38.tif	control	N2	wt	13.688	10.333	5.40622	0.744752	-4.66147	0	0.29777	0.221765	-1.38805
0000030_38.tif	control	N2	wt	13.802	10.323	5.40622	0.775696	-4.63052	0	0.29777	0.230979	-1.37883
0000030_38.tif	control	N2	wt	13.896	10.307	5.40622	0.819768	-4.58645	0	0.29777	0.244102	-1.36571
0000030_38.tif	control	N2	wt	14.271	10.12	5.40622	1.16323	-4.24299	0	0.29777	0.346374	-1.26344
0000030_38.tif	control	N2	wt	13.719	10.995	5.40622	0.138957	-5.26726	0	0.29777	0.0413772	-1.56843
0000030_38.tif	control	N2	wt	13.958	10.906	5.40622	0.391414	-5.01481	0	0.29777	0.116551	-1.49326
0000030_38.tif	control	N2	wt	14.474	10.781	5.40622	0.917695	-4.48852	0	0.29777	0.273262	-1.33655
0000030_38.tif	control	N2	wt	14.344	11.208	5.40622	0.752213	-4.65401	0	0.29777	0.223987	-1.38582
0000030_38.tif	control	N2	wt	14.094	11.411	5.40622	0.595268	-4.81095	0	0.29777	0.177253	-1.43256
0000030_38.tif	control	N2	wt	14.026	11.531	5.40622	0.622774	-4.78345	0	0.29777	0.185444	-1.42437
0000030_38.tif	control	N2	wt	14.182	11.625	5.40622	0.799242	-4.60698	0	0.29777	0.23799	-1.37182
0000030_38.tif	control	N2	wt	14.672	11.521	5.40622	1.15816	-4.24806	0	0.29777	0.344864	-1.26495
0000030_38.tif	control	N2	wt	15.297	11.354	5.40622	1.71616	-3.69006	0	0.29777	0.511021	-1.09879
0000030_38.tif	control	N2	wt	12.708	11.651	5.40622	1.06626	-4.33996	0	0.29777	0.317499	-1.29231
0000030_38.tif	control	N2	wt	12.635	12.036	5.40622	1.36614	-4.04008	0	0.29777	0.406795	-1.20302
0000030_38.tif	control	N2	wt	13.026	12.24	5.40622	1.3023	-4.10392	0	0.29777	0.387784	-1.22203
0000030_38.tif	control	N2	wt	13.005	12.448	5.40622	1.49981	-3.90641	0	0.29777	0.446598	-1.16321
0000030_38.tif	control	N2	wt	13.193	12.557	5.40622	1.53986	-3.86636	0	0.29777	0.458525	-1.15129
0000030_38.tif	control	N2	wt	13.562	12.385	5.40622	1.31267	-4.09355	0	0.29777	0.390874	-1.21894
0000030_38.tif	control	N2	wt	13.698	11.87	5.40622	0.802524	-4.6037	0	0.29777	0.238968	-1.37084
0000030_38.tif	control	N2	wt	13.844	11.755	5.40622	0.722997	-4.68322	0	0.29777	0.215287	-1.39452
0000030_38.tif	control	N2	wt	14.135	12.156	5.40622	1.20617	-4.20005	0	0.29777	0.359162	-1.25065
0000030_38.tif	control	N2	wt	14.578	11.948	5.40622	1.30931	-4.09691	0	0.29777	0.389874	-1.21994
0000030_38.tif	control	N2	wt	14.891	12.536	5.40622	1.94852	-3.4577	0	0.29777	0.580211	-1.0296
0000030_38.tif	control	N2	wt	13.141	13.438	5.40622	2.4099	-2.99632	0	0.29777	0.717594	-0.892216
0000030_38.tif	control	N2	wt	13.255	13.172	5.40622	2.12782	-3.2784	0	0.29777	0.6336	-0.97621
0000030_38.tif	control	N2	wt	13.484	13.208	5.40622	2.13837	-3.26785	0	0.29777	0.636742	-0.973068
0000030_38.tif	control	N2	wt	15.021	13.161	5.40622	2.52342	-2.8828	0	0.29777	0.751398	-0.858412
0000030_38.tif	control	N2	wt	12.781	13.792	5.40622	2.84083	-2.56539	0	0.29777	0.845913	-0.763897
0000030_38.tif	control	N2	wt	12.771	13.885	5.40622	2.93279	-2.47343	0	0.29777	0.873296	-0.736514
0000030_38.tif	control	N2	wt	12.833	14.208	5.40622	3.22842	-2.1778	0	0.29777	0.961325	-0.648485
0000030_38.tif	control	N2	wt	12.771	14.302	5.40622	3.33472	-2.0715	0	0.29777	0.992978	-0.616832
0000030_38.tif	control	N2	wt	12.5	14.479	5.40622	3.58045	-1.82577	0	0.29777	1.06615	-0.543658
0000030_38.tif	control	N2	wt	12.818	14.667	5.40622	3.67894	-1.72728	0	0.29777	1.09548	-0.514331
0000030_38.tif	control	N2	wt	13.083	14.646	5.40622	3.61079	-1.79543	0	0.29777	1.07518	-0.534627
0000030_38.tif	control	N2	wt	13.089	14.531	5.40622	3.49614	-1.91008	0	0.29777	1.04105	-0.568765
0000030_38.tif	control	N2	wt	13.375	14.958	5.40622	3.89174	-1.51448	0	0.29777	1.15884	-0.450966
0000030_38.tif	control	N2	wt	13.443	14.87	5.40622	3.80041	-1.60581	0	0.29777	1.13165	-0.478161
0000030_38.tif	control	N2	wt	13.75	14.625	5.40622	3.555	-1.85122	0	0.29777	1.05857	-0.551238
0000030_38.tif	control	N2	wt	13.833	14.484	5.40622	3.41868	-1.98754	0	0.29777	1.01798	-0.59183
0000030_38.tif	control	N2	wt	13.651	13.865	5.40622	2.7924	-2.61382	0	0.29777	0.831492	-0.778318
0000030_38.tif	control	N2	wt	13.656	13.802	5.40622	2.7295	-2.67672	0	0.29777	0.812762	-0.797048
0000030_38.tif	control	N2	wt	13.995	13.802	5.40622	2.75687	-2.64935	0	0.29777	0.820913	-0.788897
0000030_38.tif	control	N2	wt	14.13	13.854	5.40622	2.83031	-2.57591	0	0.29777	0.84278	-0.76703
0000030_38.tif	control	N2	wt	14.188	13.724	5.40622	2.71456	-2.69166	0	0.29777	0.808316	-0.801494
0000030_38.tif	control	N2	wt	14.302	13.688	5.40622	2.70655	-2.69967	0	0.29777	0.80593	-0.80388
0000030_38.tif	control	N2	wt	14.63	14.115	5.40622	3.21036	-2.19586	0	0.29777	0.95595	-0.65386
0000030_38.tif	control	N2	wt	14.547	14.193	5.40622	3.25939	-2.14683	0	0.29777	0.97055	-0.63926
0000030_38.tif	control	N2	wt	14.474	14.292	5.40622	3.3345	-2.07172	0	0.29777	0.992913	-0.616897
0000030_38.tif	control	N2	wt	14.865	14.578	5.40622	3.72494	-1.68128	0	0.29777	1.10917	-0.500636
0000030_38.tif	control	N2	wt	14.677	15.031	5.40622	4.10086	-1.30536	0	0.29777	1.22111	-0.388696
0000030_38.tif	control	N2	wt	12.979	15.448	5.40622	4.41942	-0.986803	0	0.29777	1.31597	-0.29384
0000030_38.tif	control	N2	wt	12.818	15.542	5.40622	4.53759	-0.868626	0	0.29777	1.35116	-0.258651
0000030_38.tif	control	N2	wt	15.734	16.396	5.40622	5.73334	0.327124	1	0.29777	1.70722	0.0974076
0000030_38.tif	control	N2	wt	15.625	16.26	5.40622	5.56681	0.160593	1	0.29777	1.65763	0.0478199
0000030_38.tif	control	N2	wt	15.641	16.161	5.40622	5.48061	0.0743926	1	0.29777	1.63196	0.0221519
0000030_38.tif	control	N2	wt	15.656	15.49	5.40622	4.87038	-0.535841	0	0.29777	1.45025	-0.159557
0000030_38.tif	control	N2	wt	15.771	14.885	5.40622	4.38489	-1.02133	0	0.29777	1.30569	-0.304122
0000030_38.tif	control	N2	wt	15.828	14.833	5.40622	4.3685	-1.03772	0	0.29777	1.30081	-0.309002
0000030_38.tif	control	N2	wt	15.818	14.745	5.40622	4.28782	-1.1184	0	0.29777	1.27678	-0.333027
0000030_38.tif	control	N2	wt	16.135	14.88	5.40622	4.57157	-0.834655	0	0.29777	1.36128	-0.248535
0000030_38.tif	control	N2	wt	16.479	14.891	5.40622	4.77941	-0.626811	0	0.29777	1.42316	-0.186646
0000030_38.tif	control	N2	wt	16.974	14.953	5.40622	5.13919	-0.267027	0	0.29777	1.5303	-0.0795127
0000030_38.tif	control	N2	wt	16.953	13.766	5.40622	4.29745	-1.10877	0	0.29777	1.27965	-0.330159
0000030_38.tif	control	N2	wt	17.12	13.932	5.40622	4.53168	-0.874538	0	0.29777	1.3494	-0.260411
0000030_38.tif	control	N2	wt	17.234	13.859	5.40622	4.57588	-0.830338	0	0.29777	1.36256	-0.24725
0000030_38.tif	control	N2	wt	17.198	13.984	5.40622	4.62501	-0.781206	0	0.29777	1.37719	-0.23262
0000030_38.tif	control	N2	wt	17.172	14.104	5.40622	4.68162	-0.724598	0	0.29777	1.39405	-0.215764
0000030_38.tif	control	N2	wt	17.359	14.005	5.40622	4.7641	-0.64212	0	0.29777	1.41861	-0.191204
0000030_38.tif	control	N2	wt	16.542	13.625	5.40622	3.8916	-1.51462	0	0.29777	1.1588	-0.451008
0000030_38.tif	control	N2	wt	15.802	12.63	5.40622	2.69359	-2.71263	0	0.29777	0.802072	-0.807738
0000030_38.tif	control	N2	wt	15.953	12.339	5.40622	2.66844	-2.73778	0	0.29777	0.794581	-0.81523
0000030_38.tif	control	N2	wt	15.818	12.25	5.40622	2.50741	-2.89881	0	0.29777	0.746633	-0.863177
0000030_38.tif	control	N2	wt	15.943	12.089	5.40622	2.55013	-2.85609	0	0.29777	0.759353	-0.850457
0000030_38.tif	control	N2	wt	16.078	12.047	5.40622	2.65883	-2.74739	0	0.29777	0.791718	-0.818092
0000030_38.tif	control	N2	wt	16.135	12.12	5.40622	2.73901	-2.66721	0	0.29777	0.815595	-0.794215
0000030_38.tif	control	N2	wt	16.297	12.302	5.40622	2.96018	-2.44604	0	0.29777	0.881454	-0.728356
0000030_38.tif	control	N2	wt	15.63	11.719	5.40622	2.1265	-3.27972	0	0.29777	0.633207	-0.976603
0000030_38.tif	control	N2	wt	16.005	11.719	5.40622	2.48639	-2.91983	0	0.29777	0.740371	-0.869439
0000030_38.tif	control	N2	wt	16.104	11.719	5.40622	2.58211	-2.82411	0	0.29777	0.768876	-0.840934
0000030_38.tif	control	N2	wt	16.5	11.688	5.40622	2.96058	-2.44564	0	0.29777	0.881572	-0.728238
0000030_38.tif	control	N2	wt	16.51	11.562	5.40622	2.94686	-2.45936	0	0.29777	0.877485	-0.732325
0000030_38.tif	control	N2	wt	18.13	11.969	5.40622	4.61384	-0.792383	0	0.29777	1.37386	-0.235948
0000030_38.tif	control	N2	wt	16.375	10.797	5.40622	2.78471	-2.62151	0	0.29777	0.829203	-0.780607
0000030_38.tif	control	N2	wt	16.375	10.656	5.40622	2.8022	-2.60402	0	0.29777	0.834411	-0.775399
0000030_38.tif	control	N2	wt	16.245	10.578	5.40622	2.68699	-2.71923	0	0.29777	0.800104	-0.809706
0000030_38.tif	control	N2	wt	18.036	9.927	5.40622	4.57777	-0.828454	0	0.29777	1.36312	-0.246689
0000030_38.tif	control	N2	wt	17.25	9.74	5.40622	3.88204	-1.52418	0	0.29777	1.15595	-0.453856
0000030_38.tif	control	N2	wt	16.38	9.625	5.40622	3.13096	-2.27526	0	0.29777	0.932305	-0.677506
0000030_38.tif	control	N2	wt	16.37	9.505	5.40622	3.17953	-2.22669	0	0.29777	0.946767	-0.663043
0000030_38.tif	control	N2	wt	15.76	9.495	5.40622	2.67178	-2.73444	0	0.29777	0.795577	-0.814234
0000030_38.tif	control	N2	wt	15.667	9.432	5.40622	2.63607	-2.77015	0	0.29777	0.784942	-0.824868
0000030_38.tif	control	N2	wt	17.974	8.641	5.40622	5.00115	-0.405068	0	0.29777	1.48919	-0.120617
0000030_38.tif	control	N2	wt	18.026	8.547	5.40622	5.09262	-0.313602	0	0.29777	1.51643	-0.0933812
0000030_38.tif	control	N2	wt	18.276	7.693	5.40622	5.76645	0.360233	1	0.29777	1.71708	0.107267
0000030_38.tif	control	N2	wt	18.245	7.589	5.40622	5.8032	0.396981	1	0.29777	1.72802	0.118209
0000030_38.tif	control	N2	wt	16.01	7.292	5.40622	4.48161	-0.924613	0	0.29777	1.33449	-0.275322
0000030_38.tif	control	N2	wt	16.104	7.245	5.40622	4.57204	-0.834176	0	0.29777	1.36142	-0.248393
0000030_38.tif	control	N2	wt	16.302	7.099	5.40622	4.80332	-0.6029	0	0.29777	1.43028	-0.179526
0000030_38.tif	control	N2	wt	16.135	7.448	5.40622	4.42115	-0.985068	0	0.29777	1.31649	-0.293324
0000030_38.tif	control	N2	wt	16.13	7.87	5.40622	4.0792	-1.32702	0	0.29777	1.21466	-0.395146
0000030_38.tif	control	N2	wt	16.38	8.104	5.40622	4.06462	-1.3416	0	0.29777	1.21032	-0.399488
0000030_38.tif	control	N2	wt	16.656	7.891	5.40622	4.40906	-0.997158	0	0.29777	1.31289	-0.296924
0000030_38.tif	control	N2	wt	16.87	7.708	5.40622	4.68935	-0.716872	0	0.29777	1.39635	-0.213463
0000030_38.tif	control	N2	wt	16.974	7.99	5.40622	4.56747	-0.838749	0	0.29777	1.36006	-0.249754
0000030_38.tif	control	N2	wt	20.411	20.161	5.40622	11.3546	5.94838	1	0.29777	3.38106	1.77125
0000035_18.tif	control	LX734	d123	9.698	2.984	5.34395	9.3738	4.02985	1	0.29777	2.79124	1.19997
0000035_18.tif	control	LX734	d123	8.865	3.948	5.34395	8.8747	3.53075	1	0.29777	2.64262	1.05135
0000035_18.tif	control	LX734	d123	8.333	4.719	5.34395	8.5127	3.16875	1	0.29777	2.53483	0.943558
0000035_18.tif	control	LX734	d123	8.245	4.812	5.34395	8.4891	3.14515	1	0.29777	2.5278	0.936532
0000035_18.tif	control	LX734	d123	8.245	7.62	5.34395	6.44748	1.10353	1	0.29777	1.91987	0.328597
0000035_18.tif	control	LX734	d123	8.474	7.401	5.34395	6.41305	1.0691	1	0.29777	1.90962	0.318347
0000035_18.tif	control	LX734	d123	8.807	7.057	5.34395	6.40902	1.06507	1	0.29777	1.90842	0.317147
0000035_18.tif	control	LX734	d123	9.188	6.948	5.34395	6.23088	0.886928	1	0.29777	1.85537	0.264101
0000035_18.tif	control	LX734	d123	9.62	7.182	5.34395	5.77323	0.429282	1	0.29777	1.7191	0.127827
0000035_18.tif	control	LX734	d123	11.068	7.104	5.34395	5.05244	-0.291512	0	0.29777	1.50446	-0.0868036
0000035_18.tif	control	LX734	d123	11.068	7.224	5.34395	4.94484	-0.39911	0	0.29777	1.47243	-0.118843
0000035_18.tif	control	LX734	d123	10.526	8.026	5.34395	4.54911	-0.794838	0	0.29777	1.35459	-0.236679
0000035_18.tif	control	LX734	d123	10.422	8.13	5.34395	4.53168	-0.812269	0	0.29777	1.3494	-0.241869
0000035_18.tif	control	LX734	d123	10.104	8.354	5.34395	4.575	-0.768954	0	0.29777	1.3623	-0.228971
0000035_18.tif	control	LX734	d123	8.823	8.359	5.34395	5.53878	0.194834	1	0.29777	1.64928	0.0580157
0000035_18.tif	control	LX734	d123	9.74	9.526	5.34395	4.12712	-1.21684	0	0.29777	1.22893	-0.362337
0000035_18.tif	control	LX734	d123	9.823	9.589	5.34395	4.02356	-1.32039	0	0.29777	1.19809	-0.393174
0000035_18.tif	control	LX734	d123	10.531	9.578	5.34395	3.4408	-1.90315	0	0.29777	1.02457	-0.5667
0000035_18.tif	control	LX734	d123	10.609	9.531	5.34395	3.40776	-1.93619	0	0.29777	1.01473	-0.57654
0000035_18.tif	control	LX734	d123	10.849	9.328	5.34395	3.35972	-1.98423	0	0.29777	1.00043	-0.590843
0000035_18.tif	control	LX734	d123	10.693	10	5.34395	3.06709	-2.27686	0	0.29777	0.913288	-0.67798
0000035_18.tif	control	LX734	d123	11.172	10.818	5.34395	2.26572	-3.07824	0	0.29777	0.674662	-0.916606
0000035_18.tif	control	LX734	d123	10.885	11.766	5.34395	2.399	-2.94495	0	0.29777	0.714351	-0.876917
0000035_18.tif	control	LX734	d123	9.167	11.281	5.34395	4.13016	-1.21379	0	0.29777	1.22984	-0.36143
0000035_18.tif	control	LX734	d123	9.193	11.188	5.34395	4.11358	-1.23037	0	0.29777	1.2249	-0.366369
0000035_18.tif	control	LX734	d123	8.953	11.698	5.34395	4.32831	-1.01564	0	0.29777	1.28884	-0.302427
0000035_18.tif	control	LX734	d123	9.234	11.828	5.34395	4.05109	-1.29286	0	0.29777	1.20629	-0.384975
0000035_18.tif	control	LX734	d123	8.812	12.505	5.34395	4.55081	-0.793144	0	0.29777	1.35509	-0.236174
0000035_18.tif	control	LX734	d123	8.922	12.568	5.34395	4.45544	-0.888508	0	0.29777	1.3267	-0.264571
0000035_18.tif	control	LX734	d123	8.677	12.911	5.34395	4.77462	-0.569326	0	0.29777	1.42174	-0.169528
0000035_18.tif	control	LX734	d123	10.375	13.276	5.34395	3.33193	-2.01202	0	0.29777	0.992148	-0.59912
0000035_18.tif	control	LX734	d123	10.453	13.516	5.34395	3.39035	-1.9536	0	0.29777	1.00954	-0.581723
0000035_18.tif	control	LX734	d123	9.87	13.938	5.34395	4.10952	-1.23443	0	0.29777	1.22369	-0.367575
0000035_18.tif	control	LX734	d123	12.49	16.151	5.34395	4.57392	-0.770035	0	0.29777	1.36197	-0.229293
0000035_18.tif	control	LX734	d123	12.688	15.979	5.34395	4.37339	-0.970561	0	0.29777	1.30226	-0.289004
0000035_18.tif	control	LX734	d123	13.453	16.427	5.34395	4.78409	-0.559858	0	0.29777	1.42456	-0.166709
0000035_18.tif	control	LX734	d123	13.594	16.427	5.34395	4.79123	-0.552716	0	0.29777	1.42669	-0.164582
0000035_18.tif	control	LX734	d123	13.922	16.375	5.34395	4.77224	-0.571706	0	0.29777	1.42103	-0.170237
0000035_18.tif	control	LX734	d123	14.964	15.562	5.34395	4.26234	-1.08161	0	0.29777	1.2692	-0.322071
0000035_18.tif	control	LX734	d123	14.901	15.151	5.34395	3.86127	-1.48268	0	0.29777	1.14977	-0.441497
0000035_18.tif	control	LX734	d123	13.479	15.12	5.34395	3.47964	-1.86431	0	0.29777	1.03613	-0.555136
0000035_18.tif	control	LX734	d123	13.328	14.969	5.34395	3.32333	-2.02062	0	0.29777	0.989589	-0.601679
0000035_18.tif	control	LX734	d123	13.031	15.073	5.34395	3.43611	-1.90784	0	0.29777	1.02317	-0.568099
0000035_18.tif	control	LX734	d123	14.969	14.526	5.34395	3.33822	-2.00573	0	0.29777	0.994023	-0.597245
0000035_18.tif	control	LX734	d123	13.312	14.203	5.34395	2.55719	-2.78676	0	0.29777	0.761454	-0.829814
0000035_18.tif	control	LX734	d123	13.203	13.172	5.34395	1.52799	-3.81596	0	0.29777	0.45499	-1.13628
0000035_18.tif	control	LX734	d123	13.307	13.26	5.34395	1.61421	-3.72974	0	0.29777	0.480663	-1.11061
0000035_18.tif	control	LX734	d123	13.927	13.01	5.34395	1.50924	-3.83471	0	0.29777	0.449407	-1.14186
0000035_18.tif	control	LX734	d123	14.219	13.198	5.34395	1.81344	-3.53052	0	0.29777	0.539987	-1.05128
0000035_18.tif	control	LX734	d123	14.151	13.37	5.34395	1.93108	-3.41287	0	0.29777	0.575018	-1.01625
0000035_18.tif	control	LX734	d123	14.599	13.724	5.34395	2.46073	-2.88322	0	0.29777	0.732733	-0.858536
0000035_18.tif	control	LX734	d123	14.839	14.005	5.34395	2.82706	-2.51689	0	0.29777	0.841812	-0.749456
0000035_18.tif	control	LX734	d123	14.943	14.042	5.34395	2.916	-2.42795	0	0.29777	0.868298	-0.722971
0000035_18.tif	control	LX734	d123	14.974	13.896	5.34395	2.8158	-2.52815	0	0.29777	0.838462	-0.752806
0000035_18.tif	control	LX734	d123	15.078	14.005	5.34395	2.96548	-2.37847	0	0.29777	0.883032	-0.708236
0000035_18.tif	control	LX734	d123	15.12	13.698	5.34395	2.75547	-2.58848	0	0.29777	0.820497	-0.770771
0000035_18.tif	control	LX734	d123	15.073	13.031	5.34395	2.26484	-3.07911	0	0.29777	0.674401	-0.916868
0000035_18.tif	control	LX734	d123	15.094	12.677	5.34395	2.08565	-3.2583	0	0.29777	0.621044	-0.970225
0000035_18.tif	control	LX734	d123	14.677	12.432	5.34395	1.60206	-3.74189	0	0.29777	0.477047	-1.11422
0000035_18.tif	control	LX734	d123	14.307	12.271	5.34395	1.20137	-4.14258	0	0.29777	0.357733	-1.23353
0000035_18.tif	control	LX734	d123	14.156	12.26	5.34395	1.06893	-4.27502	0	0.29777	0.318297	-1.27297
0000035_18.tif	control	LX734	d123	14.083	12.328	5.34395	1.05277	-4.29118	0	0.29777	0.313484	-1.27778
0000035_18.tif	control	LX734	d123	13.901	12.068	5.34395	0.749989	-4.59396	0	0.29777	0.223324	-1.36794
0000035_18.tif	control	LX734	d123	13.578	12.104	5.34395	0.545869	-4.79808	0	0.29777	0.162543	-1.42872
0000035_18.tif	control	LX734	d123	13.427	12.359	5.34395	0.727795	-4.61616	0	0.29777	0.216715	-1.37455
0000035_18.tif	control	LX734	d123	13.01	12.464	5.34395	0.861722	-4.48223	0	0.29777	0.256595	-1.33467
0000035_18.tif	control	LX734	d123	12.693	12.448	5.34395	0.994459	-4.34949	0	0.29777	0.29612	-1.29515
0000035_18.tif	control	LX734	d123	12.557	12.49	5.34395	1.11199	-4.23196	0	0.29777	0.331116	-1.26015
0000035_18.tif	control	LX734	d123	11.292	11.906	5.34395	2.00592	-3.33803	0	0.29777	0.597303	-0.993965
0000035_18.tif	control	LX734	d123	11.438	11.443	5.34395	1.85415	-3.4898	0	0.29777	0.552109	-1.03916
0000035_18.tif	control	LX734	d123	11.906	11.453	5.34395	1.38848	-3.95547	0	0.29777	0.413447	-1.17782
0000035_18.tif	control	LX734	d123	12.344	11.568	5.34395	0.940241	-4.40371	0	0.29777	0.279976	-1.31129
0000035_18.tif	control	LX734	d123	12.365	11.812	5.34395	0.93092	-4.41303	0	0.29777	0.2772	-1.31407
[truncated: 5,952 more rows]
